# Supplementary material for: The burden of neurological conditions in north Africa and the Middle East, 1990–2019: a systematic analysis of the Global Burden of Disease Study 2019
Source: PubMed Central journal article supplement (PMC11099299; doi:10.1016/s2214-109x(24)00093-7), 2024-04-08
Supplement: mmc2.pdf [file mmc2.pdf]

# THE LANCET

## Global Health

### Supplementary appendix 2

This translation in Arabic was submitted by the authors and we reproduce it as supplied. It has not been peer reviewed. The Lancet's editorial processes have only been applied to the original in English, which should serve as reference for this manuscript.

تم تقديم هذه الترجمة باللغة العربية من قبل المؤلفين ونعيد إنتاجها كما هو مُقدم. إنها لم تخضع لاستعراض الأقران. تم تطبيق عمليات تحرير لانسيت فقط على النص الأصلي باللغة الإنجليزية، والذي يجب أن يكون بمثابة مرجع لهذه المخطوطة.

Supplement to: GBD 2019 North Africa and the Middle East Neurology Collaborators. The burden of neurological conditions in north Africa and the Middle East, 1990–2019: a systematic analysis of the Global Burden of Disease Study 2019. *Lancet Glob Health* 2024; published online April 8. [https://doi.org/10.1016/S2214-109X\(24\)00093-7](https://doi.org/10.1016/S2214-109X(24)00093-7).

## Arabic summary

## عبء الأمراض العصبية في شمال أفريقيا والشرق الأوسط من 1990 إلى 2019: تحليل منهجي لبيانات دراسة العبء العالمي للأمراض لعام 2019

المتعاونون في طب الأعصاب في دائرة الموازنة العالمية للأمراض لعام 2019 في شمال أفريقيا والشرق الأوسط\*

خلفية: إن عبء الأمراض العصبية في شمال أفريقيا والشرق الأوسط في إزداد مستمر. نحن نهدف إلى تقييم التغيرات في عبء الحالات العصبية في هذه المنطقة للمساعدة في اتخاذ القرارات في المستقبل.

المنهجية: في هذا التحليل لبيانات دراسة العبء العالمي للأمراض والإصابات وعوامل الخطر لعام 2019، درسنا الاتجاهات الزمنية لسنوات العمر المصححة باحتساب مدة العجز (سنوات العمر المعدلة حسب العجز والوفيات، والعجز مجتمعة)، والوفيات، والحالات الحديثة، والحالات السائدة ل 14 حالة ومرض عصبي وثمانية أنواع فرعية في 21 دولة في الشرق الأوسط وشمال أفريقيا. بالإضافة إلى ذلك، قمنا بتقييم سنوات العمر المعدلة حسب العجز الناتج عن الأمراض العصبية بسبب 34 عامل خطر قابل للتعديل تنتمي إلى أربع مستويات للتصنيف خلال الفترة 1990-2019. استخدم نهج التقدير الخاص بنموذج بايزي، وحدثنا فاصل الشك بنسبة 95٪ (UIs) للتقديرات النهائية بناء على القيم المرتبة الـ 25 و الـ 975 من 1000 سحب من التوزيع الخلفي.

النتائج: في عام 2019، كان هناك 441.1 ألف حالة وفاة (95% فاصل الشك 347.2 إلى 598.4) و 17.6 مليون سنة (95% فاصل الشك 12.5 إلى 24.7%) من سنوات العمر المعدلة حسب العجز في شمال أفريقيا والشرق الأوسط. وكانت الأسباب الرئيسية لسنوات العمر المصححة للعجز الناتج عن الأمراض العصبية هي السكتة الدماغية والصداع النصفي ومرض الزهايمر والأنواع الأخرى من الخرف (المشار إليه فيما يلي بالخرف). في شمال أفريقيا والشرق الأوسط، يعزى 85.8% (95% فاصل الشك 82.6 إلى 89.1%) من سنوات العمر المصححة باحتساب مدة العجز للسكتات الدماغية و 39.9% (95% فاصل الشك 26.4 إلى 54.7%) من سنوات العمر المصححة باحتساب مدة العجز للخرف كانت تُعزى إلى عوامل خطر قابلة للتعديل. سجلت شمال أفريقيا والشرق الأوسط أعلى معدلات سنوات العمر المعدلة باحتساب مدة العجز للخرف 387.0 (95% فاصل الشك 107.0 إلى 1371.8) و مرض باركنسون 84.4 (95% فاصل الشك 74.7 إلى 103.2) والصداع النصفي 601.4 (95% فاصل الشك 107.0 إلى 1371.8) بين مناطق العالم. خلال الفترة 1990-2019، انخفضت سنوات العمر المصححة باحتساب العجز المطلقة المتعلقة بالتهاب السحايا 75.8- (95% فاصل الشك 81.1- إلى 81.1) والكزاز 88.2- (95% فاصل الشك 93.9- إلى 76.1) ونزيف تحت العنكبوتية 62.8- (95% فاصل الشك 71.6- إلى 41.0)، ولكن بالنسبة لجميع الحالات العصبية الأخرى لم يكن هناك تغيير. خلال الفترة من 1990 إلى 2019. خلال الفترة 1990-2019، زاد عدد سنوات العمر المعدلة حسب العجز الناجم عن الخرف ومرض باركنسون والتصلب اللويحي والسكتة الدماغية الإقفارية واضطرابات الصداع (أي الصداع النصفي والصداع من نوع التوتر) بأكثر من الضعف في المنطقة. وزاد عبء سنوات العيش مع الإعاقة (YLDs)، وحدوث وانتشار التصلب المتعدد، ومرض الخلايا العصبية الحركية، ومرض باركنسون، والسكتة الدماغية الإقفارية في كل من المعدل المعياري للعمر وعدده. خلال هذه الفترة، تقريبا تضاعف العبء المطلق ل YLDS بسبب إصابات الرأس والعمود الفقري.

تفسير: يصاحب العبء العصبي المتزايد في شمال أفريقيا والشرق الأوسط ارتفاع نسبة الشيخوخة للسكان. السكتة الدماغية والخرف هي الأسباب الرئيسية للإعاقة العصبية ومعدلات الوفيات، والتي تعزى في المقام الأول إلى عوامل الخطر الشائعة القابلة للتعديل. وهي تتطلب تدخلات متآزرية ومنهجية ومستمرة ومتعددة القطاعات تهدف إلى كبح العبء أو التخفيف منه.

التمويل: مؤسسة بيل و ميليندا غيتس

حقوق النشر © 2024 المؤلف (المؤلفون). نشرت من قبل إلسفير المحدودة. هذه مقالة مفتوحة الوصول بموجب ترخيص CC BY 4.0
