# Supplementary material for: The burden of neurological conditions in north Africa and the Middle East, 1990–2019: a systematic analysis of the Global Burden of Disease Study 2019
Source: PubMed Central journal article supplement (PMC11099299; doi:10.1016/s2214-109x(24)00093-7), 2024-04-08
Supplement: mmc4.pdf [file mmc4.pdf]

# THE LANCET

## Global Health

### Supplementary appendix 4

This appendix formed part of the original submission and has been peer reviewed. We post it as supplied by the authors.

Supplement to: GBD 2019 North Africa and the Middle East Neurology Collaborators. The burden of neurological conditions in north Africa and the Middle East, 1990–2019: a systematic analysis of the Global Burden of Disease Study 2019. *Lancet Glob Health* 2024; published online April 8. [https://doi.org/10.1016/S2214-109X\(24\)00093-7](https://doi.org/10.1016/S2214-109X(24)00093-7).

## Table of contents

|                                                                                                                                                             |          |
|-------------------------------------------------------------------------------------------------------------------------------------------------------------|----------|
| <b>Table of contents</b> .....                                                                                                                              | <b>1</b> |
| <b>Authors' contributions</b> .....                                                                                                                         | <b>6</b> |
| <b>Supplementary Methods</b> .....                                                                                                                          | <b>8</b> |
| Table S1. Guidelines for Accurate and Transparent Health Estimates Reporting (GATHER) checklist of information for reports of global health estimates ..... | 8        |
| 1. Data.....                                                                                                                                                | 10       |
| 1.1. Data sources and outcome measures .....                                                                                                                | 10       |
| Table S2. Global Burden of Disease Study 2019 (GBD 2019) data input sources counts for neurological conditions in North Africa and Middle East .....        | 10       |
| 1.2. Regions and nations.....                                                                                                                               | 13       |
| Table S3. Global Burden of Disease Study 2019 (GBD 2019) classification of countries and regions .....                                                      | 13       |
| 1.3. GBD 2019 neurological data changes.....                                                                                                                | 14       |
| 1.4. Literature search .....                                                                                                                                | 14       |
| 2. Methodological summary of neurological conditions and definition of risk factors .....                                                                   | 15       |
| Table S4. Neurological conditions included in the present study and their definitions based on the Global Burden of Disease Study 2019 (GBD 2019).....      | 15       |
| Table S5. Risk factor exposure definitions in the Global Burden of Disease Study 2019 .....                                                                 | 16       |
| Table S6. Classification of risk factors in the Global Burden of Disease Study 2019 (GBD 2019).....                                                         | 17       |
| 3. Modelling.....                                                                                                                                           | 19       |
| 3.1. Fatal disease modelling.....                                                                                                                           | 19       |
| 3.1.1 Modelling steps for idiopathic epilepsy death estimation (as an example of fatal modelling processes) ...                                             | 20       |
| Table S7. Predictive covariates used in the epilepsy fatal modelling process .....                                                                          | 20       |
| Figure S1. Plot of the relative influence of covariates for idiopathic epilepsy .....                                                                       | 21       |
| Figure S2. Flowchart of modelling steps to epilepsy-related death and years of life lost (YLLs).....                                                        | 21       |
| 3.2. Non-fatal disease modelling .....                                                                                                                      | 22       |
| 3.2.1. Modelling steps for non-fatal dementia estimation (as an example of non-fatal modelling processes).....                                              | 22       |
| Figure S3. Flowchart of modelling steps for non-fatal dementia estimation .....                                                                             | 22       |
| Table S8. Results of non-reference adjusted meta-regression analysis for dementia estimations .....                                                         | 23       |
| Table S9. Dementia severity definitions .....                                                                                                               | 24       |
| 3.3. Choosing the appropriate model and imprecision of the estimates.....                                                                                   | 24       |
| 3.4. Heterogeneities .....                                                                                                                                  | 25       |
| 3.5. GBD global standard population .....                                                                                                                   | 26       |
| 3.6. Risk factor estimation .....                                                                                                                           | 26       |
| 3.6.1. Determine relative risks .....                                                                                                                       | 27       |
| 3.6.2 Search terms and data preparation .....                                                                                                               | 28       |
| 3.6.3. Data analysis.....                                                                                                                                   | 29       |
| 3.6.4. Estimates exposure .....                                                                                                                             | 30       |
| Theoretical minimum-risk exposure level (TMREL) .....                                                                                                       | 31       |
| Estimate population-attributable fractions .....                                                                                                            | 31       |
| Estimate summary exposure values .....                                                                                                                      | 32       |
| Mediation.....                                                                                                                                              | 32       |
| Calculating the burden of multiple risk factors.....                                                                                                        | 33       |
| Adjusting for mediation .....                                                                                                                               | 33       |
| Calculating mediation factor.....                                                                                                                           | 33       |
| Uncertainty of aggregated and mediated PAFs.....                                                                                                            | 34       |
| Important assumptions in aggregating risk factors and including mediation.....                                                                              | 34       |

|                                                                          |    |
|--------------------------------------------------------------------------|----|
| Estimate attributable burden .....                                       | 34 |
| Decomposition analysis of deaths and DALYs .....                         | 34 |
| 4. Detailed methodology for each condition .....                         | 36 |
| 4.1. Alzheimer’s disease and other dementias (fatal modelling) .....     | 36 |
| Input data .....                                                         | 36 |
| Modelling strategy .....                                                 | 37 |
| Overview .....                                                           | 37 |
| Modelling steps.....                                                     | 37 |
| 4.2. Alzheimer’s disease and other dementias (non-fatal modelling) ..... | 40 |
| Flowchart .....                                                          | 40 |
| Input data and methodological summary .....                              | 40 |
| Case definition .....                                                    | 40 |
| Model inputs .....                                                       | 40 |
| Item Response Theory for prevalence prediction .....                     | 41 |
| Excluding incidence.....                                                 | 41 |
| Severity splits .....                                                    | 41 |
| Prisma diagram of dementia severity split systematic review .....        | 42 |
| Figure. Severity ratios for each 5-year age bin, by sex. ....            | 43 |
| Relative risk due to other causes.....                                   | 43 |
| Modelling strategy .....                                                 | 44 |
| 4.3. Parkinson’s Disease (fatal modelling) .....                         | 46 |
| Input Data .....                                                         | 46 |
| Modelling Strategy .....                                                 | 46 |
| Overview .....                                                           | 46 |
| Modelling steps .....                                                    | 47 |
| 4.4. Parkinson’s Disease (non-fatal modelling) .....                     | 51 |
| Flowchart .....                                                          | 51 |
| Case definition.....                                                     | 51 |
| Model inputs .....                                                       | 51 |
| Modelling strategy .....                                                 | 52 |
| MR-BRT Crosswalk Adjustment Factors for Parkinson’s Disease .....        | 52 |
| Severity splits .....                                                    | 53 |
| 4.5. Idiopathic Epilepsy (fatal modelling) .....                         | 54 |
| Flowchart .....                                                          | 54 |
| Input Data and Methodological Summary for Idiopathic Epilepsy .....      | 54 |
| Input data .....                                                         | 54 |
| Modelling strategy .....                                                 | 54 |
| 4.6. Epilepsy impairment envelope (non-fatal modelling).....             | 56 |
| Flowchart .....                                                          | 56 |
| Case definition.....                                                     | 56 |
| Input data and processing .....                                          | 56 |
| Modelling strategy .....                                                 | 58 |
| Severity splits & disability weights .....                               | 59 |
| 4.7. Multiple Sclerosis (fatal modelling) .....                          | 60 |
| Flowchart .....                                                          | 60 |
| Input Data and Methodological Summary for Multiple Sclerosis .....       | 60 |
| Input data .....                                                         | 60 |
| Modelling strategy .....                                                 | 60 |
| 4.8. Multiple sclerosis (non-fatal modelling).....                       | 62 |

|                                                                             |    |
|-----------------------------------------------------------------------------|----|
| Flowchart.....                                                              | 62 |
| Input data and methodological summary.....                                  | 62 |
| Case definition.....                                                        | 62 |
| Input data and processing.....                                              | 62 |
| Modelling strategy.....                                                     | 63 |
| Compartmental model.....                                                    | 63 |
| Severity splits.....                                                        | 63 |
| 4.9. Headaches (non-fatal modelling).....                                   | 65 |
| Flowchart.....                                                              | 65 |
| Input Data and Methodological Summary for Headaches.....                    | 65 |
| Case definition.....                                                        | 65 |
| Migraine.....                                                               | 65 |
| Tension-type headache.....                                                  | 66 |
| Medication overuse headache.....                                            | 66 |
| Input data.....                                                             | 66 |
| Migraine.....                                                               | 66 |
| Tension-type headache.....                                                  | 67 |
| Medication overuse headache.....                                            | 67 |
| Age and sex splitting.....                                                  | 67 |
| Data adjustment (Bias adjustments).....                                     | 67 |
| Modelling strategy.....                                                     | 69 |
| Migraine.....                                                               | 69 |
| Tension-type headache.....                                                  | 70 |
| Medication overuse headache.....                                            | 70 |
| Medication overuse headache split.....                                      | 71 |
| 4.10. Motor Neuron Disease (fatal modelling).....                           | 72 |
| Flowchart.....                                                              | 72 |
| Input Data and Methodological Summary for Motor Neuron Disease.....         | 72 |
| Input data.....                                                             | 72 |
| Modelling strategy.....                                                     | 72 |
| 4.11. Motor neuron diseases (non-fatal modelling).....                      | 74 |
| Flowchart.....                                                              | 74 |
| Case definition.....                                                        | 74 |
| Input data and data processing.....                                         | 74 |
| Modelling strategy.....                                                     | 75 |
| Severity splits.....                                                        | 76 |
| 4.12. Other Neurological Disorders (fatal modelling).....                   | 80 |
| Flowchart.....                                                              | 80 |
| Input Data and Methodological Summary for Other Neurological Disorders..... | 80 |
| Input data.....                                                             | 80 |
| Modelling strategy.....                                                     | 80 |
| 4.13. Other neurological disorders (non-fatal modelling).....               | 82 |
| 4.14. Stroke (fatal modelling).....                                         | 83 |
| 4.14.1. Ischaemic stroke.....                                               | 83 |
| Input data.....                                                             | 83 |
| Modelling strategy.....                                                     | 83 |
| 4.14.2. Intracerebral haemorrhage.....                                      | 84 |
| Input data.....                                                             | 84 |
| Modelling strategy.....                                                     | 85 |



|                                                                                                                                                                                                                                                 |           |
|-------------------------------------------------------------------------------------------------------------------------------------------------------------------------------------------------------------------------------------------------|-----------|
| 4.14.3. Subarachnoid haemorrhage.....                                                                                                                                                                                                           | 85        |
| Input data .....                                                                                                                                                                                                                                | 85        |
| Modelling strategy .....                                                                                                                                                                                                                        | 85        |
| Selected covariates for CODEm models, subarachnoid haemorrhage.....                                                                                                                                                                             | 86        |
| 4.14.4. Selected covariates for CODEm models, overall stroke and subtypes .....                                                                                                                                                                 | 86        |
| DisMod covariates .....                                                                                                                                                                                                                         | 87        |
| ICD Codes used in fatal and non-fatal analysis .....                                                                                                                                                                                            | 89        |
| 5. Supplementary limitations .....                                                                                                                                                                                                              | 90        |
| 6. Confounding factors in context.....                                                                                                                                                                                                          | 91        |
| <b>Supplementary Results.....</b>                                                                                                                                                                                                               | <b>92</b> |
| 1. All ages values.....                                                                                                                                                                                                                         | 92        |
| Figure S4. The proportions of disability-adjusted life years related to neurological conditions in A) North Africa and Middle East and B) the globe.....                                                                                        | 92        |
| Figure S5. Heat maps of the burden of neurological conditions in all ages among 21 countries of North Africa and Middle East in 2019 .....                                                                                                      | 93        |
| Figure S6. Trends of the absolute number of disability-adjusted life years (DALYs) related to neurological conditions in North Africa and Middle East .....                                                                                     | 97        |
| 2. Age-standardised values .....                                                                                                                                                                                                                | 99        |
| Figure S7. Ranks of age-standardised neurological disability-adjusted life years (DALYs) rates in seven GBD super regions and four World Bank income levels in 2019.....                                                                        | 99        |
| Figure S8. Trends of the age-standardised rate of disability-adjusted life years (DALYs) related to neurological conditions in North Africa and Middle East. ....                                                                               | 99        |
| Figure S9. Ranks of age-standardised neurological disability-adjusted life years (DALYs) rates in North Africa and Middle East countries compared with other regions in the world in 2019.....                                                  | 101       |
| 3. Modifiable risk factors.....                                                                                                                                                                                                                 | 102       |
| Figure S10. Ranks of age-standardised rates of (A) stroke and (B) dementia disability-adjusted life years (DALYs) attributable to risk factors in North Africa and Middle East countries compared with other regions in the world in 2019. .... | 102       |
| 4. Age- and sex-specific proportions .....                                                                                                                                                                                                      | 103       |
| Figure S11. Age-specific burden of neurological conditions in North Africa and Middle East measured by disability-adjusted life years (DALYs) among (A) males and (B) females. ....                                                             | 104       |
| 5. Supplementary results tables .....                                                                                                                                                                                                           | 105       |
| Table S10 Global and regional burden, mortality, incidence, and prevalence of neurological conditions in different regions of the world .....                                                                                                   | 105       |
| Table S11 Cause- and sex-specific burden, mortality, incidence, and prevalence of neurological conditions in North Africa and Middle East countries .....                                                                                       | 143       |
| Table S12 Burden, mortality, incidence, and prevalence of neurological conditions in North Africa and Middle East countries .....                                                                                                               | 195       |
| Table S13 Disability, prevalence, and incidence of head and spinal injuries in North Africa and Middle East countries.....                                                                                                                      | 254       |
| Table S14 Regional incidence, prevalence, and disability of head and spinal injuries in the world and in North Africa and Middle East countries .....                                                                                           | 266       |
| Table S15 Burden of neurological conditions attributable to risk factors in North Africa and Middle East countries.....                                                                                                                         | 276       |
| Table S16 Regional and national disabilities and deaths related to neurological conditions attributable to risk factors in North Africa and Middle East countries .....                                                                         | 321       |
| Table S17 Age-specific disability and death related to neurological conditions (NCs) in North Africa and Middle East countries in 2019 .....                                                                                                    | 440       |

|                                                                                                                                                                                                             |            |
|-------------------------------------------------------------------------------------------------------------------------------------------------------------------------------------------------------------|------------|
| Table S18 Age-specific disability and death related to stroke in North Africa and Middle East countries in 2019 .....                                                                                       | 447        |
| Table S19 Age-specific disability and death related to Alzheimer’s disease in North Africa and Middle East countries in 2019 .....                                                                          | 454        |
| Table S20 Age-specific disability and death related to Parkinson’s disease in North Africa and Middle East countries in 2019 .....                                                                          | 461        |
| Table S21 Age-specific disability and death related to meningitis in North Africa and Middle East countries in 2019 .....                                                                                   | 468        |
| Table S22 Age-specific disability and death related to encephalitis in North Africa and Middle East countries in 2019 .....                                                                                 | 475        |
| Table S23 Age-specific disability and death related to tetanus in North Africa and Middle East countries in 2019 .....                                                                                      | 482        |
| Table S24 Age-specific disability and death related to brain and central nervous system cancer in North Africa and Middle East countries in 2019 .....                                                      | 489        |
| Table S25 Age-specific disability and death related to idiopathic epilepsy in North Africa and Middle East countries in 2019 .....                                                                          | 496        |
| Table S26 Age-specific disability and death related to multiple sclerosis in North Africa and Middle East countries in 2019 .....                                                                           | 503        |
| Table S27 Age-specific disability related to headache disorders in North Africa and Middle East countries in 2019 .....                                                                                     | 510        |
| Table S28 Age-specific disability and death related to motor neuron disease in North Africa and Middle East countries in 2019 .....                                                                         | 513        |
| Table S29 Age-specific disability and death related to other rare neurological conditions in North Africa and Middle East countries in 2019 .....                                                           | 520        |
| Table S30 Age-specific disability and death related to neurological disorders in North Africa and Middle East countries in 2019 .....                                                                       | 527        |
| Table S31 Age- and sex-specific disability, prevalent cases, and new cases of head and spinal injuries in North Africa and Middle East countries in 2019 .....                                              | 534        |
| Table S32 Temporal changes in the number of DALY, mortality, incidence, prevalence, and YLD of neurological conditions in North Africa and Middle East and the world from 2010 to 2019 .....                | 540        |
| Table S33 Temporal changes in the age-standardised rate of DALY, mortality, incidence, prevalence, and YLD of neurological conditions in North Africa and Middle East and the world from 2010 to 2019 ..... | 553        |
| Table S34 Systematic literature search for the epidemiological measures of neurological conditions in North Africa and Middle East countries .....                                                          | 566        |
| <b>References .....</b>                                                                                                                                                                                     | <b>569</b> |

## Authors' contributions

### Providing data or critical feedback on data sources

Sina Abdollahzade, Hassan Abidi, Hassan Abolhassani, Ahmed Abualhasan, Niveen ME Abu-Rmeileh, Ahmed Abu-Zaid, Sepideh Ahmadi, Hanadi Al Hamad, Fahad Mashhour Alanezi, Turki M Alanzi, Syed Mohamed Aljunid, Jalal Arabloo, Judie Arulappan, Mohammad Athar, Seyyed Shamsadin Athari, Abolfazl Avan, Ahmed Y Azzam, Sara Bagherieh, Ovidiu Constantin Baltatu, Derrick A. Bennett, Vijayalakshmi S Bhojaraja, Mohamed Fahmy Doheim, Fariba Dorostkar, Ebrahim Eini, Nevine El Nahas, Iman El Sayed, Sharareh Eskandarieh, Mohammad Farahmand, Valery L Feigin, Mansour Ghafourifard, Sherief Ghozy, Pouya Goleij, Vladimir Hachinski, Nima Hafezi-Nejad, Arvin Haj-Mirzaian, Ahmed I Hasaballah, Reza Heidari-Soureshjani, Haitham Jahrami, Tahereh Javaheri, Sathish Kumar Jayapal, Rohollah Kalhor, Yousef Saleh Khader, Maseer Khan, Moien AB Khan, Savita Lasrado, Mohammed Magdy Abd El Razek, Mohammad Ali Mansournia, Parham Mardi, Entezar Mehrabi Nasab, Ritesh G Menezes, Soheil Mohammadi, Syam Mohan, Ali H Mokdad, Sara Momtazmanesh, Majid Motaghinejad, Mohsen Naghavi, Zuhair S Natto, Mayowa O Owolabi, Simone Perna, Michael A Piradov, Vafa Rahimi-Movaghar, Amir Masoud Rahmani, Ali Rajabpour-Sanati, Chythra R Rao, Reza Rawassizadeh, Negar Rezaei, Nima Rezaei, Aly M A Saad, Basema Saddik, Sahar Saeedi Moghaddam, Abdallah M Samy, Brijesh Sathian, Mete Saylan, Mehran Shams-Beyranvand, Javad Sharifi-Rad, Jeevan K Shetty, Parnian Shobeiri, Soraya Siabani, Yasaman Taheri Abkenar, Sahel Valadan Tahbaz, Bay Vo, Seyed Hossein Yahyazadeh Jabbari, Iman Zare, and Mohammad Zoladl.

### Developing methods or computational machinery

Abolfazl Avan, Valery L Feigin, Sherief Ghozy, Tahereh Javaheri, Sathish Kumar Jayapal, Ali H Mokdad, Mohsen Naghavi, Amir Masoud Rahmani, Reza Rawassizadeh, Javad Sharifi-Rad, and Bay Vo.

### Providing critical feedback on methods or results

Amirali Aali, Sina Abdollahzade, Hassan Abidi, Hassan Abolhassani, Ahmed Abualhasan, Eman Abu-Gharbieh, Niveen ME Abu-Rmeileh, Ahmed Abu-Zaid, Aqeel Ahmad, Luai A Ahmed, Hanadi Al Hamad, Fahad Mashhour Alanezi, Turki M Alanzi, Yousef Alimohamadi, Syed Mohamed Aljunid, Rajaa M Al-Raddadi, Sohrab Amiri, Jalal Arabloo, Judie Arulappan, Ashokan Arumugam, Ali A Asadi-Pooya, Mohammad Athar, Seyyed Shamsadin Athari, Maha Moh'd Wahbi Atout, Abolfazl Avan, Sina Azadnajafabad, Mohammadreza Azangou-Khyavy, Amirhossein Azari Jafari, Ahmed Y Azzam, Nayereh Baghcheghi, Sara Bagherieh, Ovidiu Constantin Baltatu, Derrick A. Bennett, Vijayalakshmi S Bhojaraja, Ali Bijani, Amira Hamed Darwish, Shirin Djalalinia, Mohamed Fahmy Doheim, Fariba Dorostkar, Ebrahim Eini, Nevine El Nahas, Iman El Sayed, Muhammed Elhadi, Mohamed A Elmonem, Sharareh Eskandarieh, Shahriar Faghani, Aida Fallahzadeh, Valery L Feigin, Mansour Ghafourifard, Ali Gholami, Vladimir Hachinski, Mostafa Hadei, Nima Hafezi-Nejad, Arvin Haj-Mirzaian, Rabih Halwani, Samer Hamidi, Ahmed I Hasaballah, Khedidja Hedna, Reza Heidari-Soureshjani, Mohammad-Salar Hosseini, Soodabeh Hoveidamanesh, Haitham Jahrami, Elham Jamshidi, Tahereh Javaheri, Sathish Kumar Jayapal, Laleh R Kalankesh, Rohollah Kalhor, Zahra Kamiab, Mohammad Keykhaei, Yousef Saleh Khader, Maseer Khan, Moien AB Khan, Khatatbeh, Ahmad Khosravi, Farzad Kompani, Hamid Reza Koohestani, Bagher Larijani, Savita Lasrado, Mohammed Magdy Abd El Razek, Mohammad-Reza Malekpour, Ahmad Azam Malik, Mohammad Ali Mansournia, Parham Mardi, Seyed Farzad Maroufi, Sahar Masoudi, Mahsa Mayeli, Entezar Mehrabi Nasab, Ritesh G Menezes, Seyyedmohammadsadeq Mirmoeeni, Mohammad Mirza-Aghazadeh-Attari, Maryam Mobarakabadi, Esmaeil Mohammadi, Soheil Mohammadi, Syam Mohan, Ali H Mokdad, Sara Momtazmanesh, Fateme Montazeri, Mostafa Moradi Sarabi, Paula Moraga, Negar Morovatdar, Majid Motaghinejad, Mohsen Naghavi, Zuhair S Natto, Seyed Aria Nejadghaderi, Nafise Noroozi, Hassan Okati-Aliabad, Mayowa O Owolabi, Simone Perna, Michael A Piradov, Mohammadreza Pourahmadi, Alireza Rafiei, Vafa Rahimi-Movaghar, Amir Masoud Rahmani, Shayan Rahmani, Vahid Rahmanian, Ali Rajabpour-Sanati, Chythra R Rao, Mohammad-Mahdi Rashidi, Reza Rawassizadeh, Iman Razeghian-Jahromi, Elrashdy Moustafa Mohamed Redwan, Malihe Rezaee, Nazila Rezaei, Nima Rezaei, Mohsen Rezaeian, Reza Rikhtegar, Aly M A Saad, Basema Saddik, Saeid Sadeghian, Sahar Saeedi Moghaddam, Abdallah M Samy, Nima Sanadgol, Arash Sarveazad, Brijesh Sathian, Mete Saylan, Ataollah

Shahbandi, Shayan Shahrokhi, Mehran Shams-Beyranvand, Mohd Shanawaz, Javad Sharifi-Rad, Rahim Ali Sheikhi, Jeevan K Shetty, Parnian Shobeiri, Seyed Afshin Shorofi, Soraya Siabani, Jaimie D Steinmetz, Saverio Stranges, Seyyed Mohammad Tabatabaei, Yasaman Taheri Abkenar, Moslem Taheri Soodejani, Mohamad-Hani Temsah, Sahel Valadan Tahbaz, Rohollah Valizadeh, Siavash Vaziri, Bay Vo, Seyed Hossein Yahyazadeh Jabbari, Metin Yesiltepe, Nazar Zaki, Ali Zare Dehnavi, and Mohammad Zoladl.

**Drafting the work or revising it critically for important intellectual content**

Amirali Aali, Mohsen Abbasi-Kangevari, Zeinab Abbasi-Kangevari, Foad Abd-Allah, Sina Abdollahzade, Hassan Abidi, Hassan Abolhassani, Ahmed Abualhasan, Eman Abu-Gharbieh, Ahmed Abu-Zaid, Sepideh Ahmadi, Luai A Ahmed, Marjan Ajami, Fahad Mashhour Alanezi, Turki M Alanzi, Sohrab Amiri, Jalal Arabloo, Judie Arulappan, Ashokan Arumugam, Ali A Asadi-Pooya, Seyyed Shamsadin Athari, Maha Moh'd Wahbi Atout, Abolfazl Avan, Sina Azadnajafabad, Mohammadreza Azangou-Khyavy, Amirhossein Azari Jafari, Ahmed Y Azzam, Sara Bagherieh, Ovidiu Constantin Baltatu, Gholamreza Bazmandegan, Derrick A. Bennett, Vijayalakshmi S Bhojaraja, Saeid Bitaraf, Daniela Calina, Mohamed Fahmy Doheim, Ebrahim Eini, Iman El Sayed, Muhammed Elhadi, Mohamed A Elmonem, Sharareh Eskandarieh, Shahrar Faghani, Aida Fallahzadeh, Valery L Feigin, Seyyed-Hadi Ghamari, Sherief Ghozy, Vladimir Hachinski, Mostafa Hadei, Nima Hafezi-Nejad, Arvin Haj-Mirzaian, Rabih Halwani, Ahmed I Hasaballah, Amr Hassan, Khedidja Hedna, Mohamed I Hegazy, Mohammad-Salar Hosseini, Haitham Jahrami, Sathish Kumar Jayapal, Laleh R Kalankesh, Yousef Saleh Khader, Maseer Khan, Moien AB Khan, Khatatbeh, Hamid Reza Khayat Kashani, Farzad Kompani, Bagher Larijani, Savita Lasrado, Mohammed Magdy Abd El Razek, Mohammad-Reza Malekpour, Ahmad Azam Malik, Parham Mardi, Mahsa Mayeli, Entezar Mehrabi Nasab, Ritesh G Menezes, Seyyedmohammadsadeq Mirmoeeni, Esmaeil Mohammadi, Soheil Mohammadi, Ali H Mokdad, Sara Momtazmanesh, Fateme Montazeri, Mostafa Moradi Sarabi, Paula Moraga, Majid Motaghinejad, Mohsen Naghavi, Zuhair S Natto, Seyed Aria Nejadghaderi, Mayowa O Owolabi, Hamidreza Pazoki Toroudi, Michael A Piradov, Vafa Rahimi-Movaghar, Shayan Rahmani, Chythra R Rao, Iman Razeghian-Jahromi, Elrashdy Moustafa Mohamed Redwan, Nazila Rezaei, Nima Rezaei, Aly M A Saad, Basema Saddik, Masoumeh Sadeghi, Amirhossein Sahebkar, Saina Salahi, Sarvenaz Salahi, Abdallah M Samy, Arash Sarveazad, Mete Saylan, Mehran Shams-Beyranvand, Mohd Shanawaz, Javad Sharifi-Rad, Jeevan K Shetty, Parnian Shobeiri, Seyed Afshin Shorofi, Jaimie D Steinmetz, Saverio Stranges, Yasaman Taheri Abkenar, Mohamad-Hani Temsah, Alireza Vakilian, Sahel Valadan Tahbaz, Seyed Hossein Yahyazadeh Jabbari, Iman Zare, Ali Zare Dehnavi, and Mohammad Zoladl.

**Managing the estimation or publications process**

Abolfazl Avan, Ali H Mokdad, and Mohsen Naghavi.

## Supplementary Methods

The proposal for the present study (1523-GBD2019-032020) has been approved by the Global Burden of Diseases, Injuries, and Risk Factors Study (GBD) Scientific Publications team. The manuscript is written according to the Guidelines for Accurate and Transparent Health Estimates Reporting (GATHER) statement (Table S1) and approved by the University of Washington institutional review board committee. The GBD protocol is also available [online](#).

| <b>Table S1. Guidelines for Accurate and Transparent Health Estimates Reporting (GATHER) checklist of information for reports of global health estimates</b> |                                                                                                                                                                                                                                                                                                                                                                                         |                                                                         |
|--------------------------------------------------------------------------------------------------------------------------------------------------------------|-----------------------------------------------------------------------------------------------------------------------------------------------------------------------------------------------------------------------------------------------------------------------------------------------------------------------------------------------------------------------------------------|-------------------------------------------------------------------------|
| Item                                                                                                                                                         | Checklist item                                                                                                                                                                                                                                                                                                                                                                          | Reference                                                               |
| <b>Objectives and funding</b>                                                                                                                                |                                                                                                                                                                                                                                                                                                                                                                                         |                                                                         |
| 1                                                                                                                                                            | Define the indicator(s), populations (including age, sex, and geographic entities), and time period(s) for which estimates were made                                                                                                                                                                                                                                                    | Methods, paragraphs 2, 3, and 6                                         |
| 2                                                                                                                                                            | List the funding sources for the work                                                                                                                                                                                                                                                                                                                                                   | Methods, section “role of the funding source”                           |
| <b>Data Inputs</b>                                                                                                                                           |                                                                                                                                                                                                                                                                                                                                                                                         |                                                                         |
| <i>For all data inputs from multiple sources that are synthesised as part of the study</i>                                                                   |                                                                                                                                                                                                                                                                                                                                                                                         |                                                                         |
| 3                                                                                                                                                            | Describe how the data were identified and how the data were accessed                                                                                                                                                                                                                                                                                                                    | Supplementary methods, sections 1, 3.6, and 4                           |
| 4                                                                                                                                                            | Specify the inclusion and exclusion criteria. Identify all ad-hoc exclusions                                                                                                                                                                                                                                                                                                            | Supplementary Methods, sections 1.1 and 4                               |
| 5                                                                                                                                                            | Provide information on all included data sources and their main characteristics. For each data source used, report reference information or contact name/institution, population represented, data collection method, year(s) of data collection, sex and age range, diagnostic criteria or measurement method, and sample size, as relevant                                            | Methods; Supplementary Methods, sections 1, 3.6, and 4                  |
| 6                                                                                                                                                            | Identify and describe any categories of input data that have potentially important biases (eg, based on characteristics listed in item 5)                                                                                                                                                                                                                                               | Discussion, paragraphs 6 and 7; Supplementary Methods, sections 5 and 6 |
| <i>For data inputs that contribute to the analysis but were not synthesised as part of the study</i>                                                         |                                                                                                                                                                                                                                                                                                                                                                                         |                                                                         |
| 7                                                                                                                                                            | Describe and give sources for any other data inputs                                                                                                                                                                                                                                                                                                                                     | Supplementary Methods, sections 1.1, 3.2, and 4                         |
| <i>For all data inputs</i>                                                                                                                                   |                                                                                                                                                                                                                                                                                                                                                                                         |                                                                         |
| 8                                                                                                                                                            | Provide all data inputs in a file format from which data can be efficiently extracted (eg, a spreadsheet rather than a PDF), including all relevant meta-data listed in item 5. For any data inputs that cannot be shared because of ethical or legal reasons, such as third-party ownership, provide a contact name or the name of the institution that retains the right to the data. | Supplementary Methods, section 1.1                                      |

**Table S1. Guidelines for Accurate and Transparent Health Estimates Reporting (GATHER) checklist of information for reports of global health estimates**

| Item                          | Checklist item                                                                                                                                                                                                                                                         | Reference                                                             |
|-------------------------------|------------------------------------------------------------------------------------------------------------------------------------------------------------------------------------------------------------------------------------------------------------------------|-----------------------------------------------------------------------|
| <b>Data analysis</b>          |                                                                                                                                                                                                                                                                        |                                                                       |
| 9                             | Provide a conceptual overview of the data analysis method. A diagram may be helpful                                                                                                                                                                                    | Supplementary Methods, sections 2, 3.1, and 3.2                       |
| 10                            | Provide a detailed description of all steps of the analysis, including mathematical formulae. This description should cover, as relevant, data cleaning, data pre-processing, data adjustments and weighting of data sources, and mathematical or statistical model(s) | Supplementary Methods, sections 2, 3, and 4                           |
| 11                            | Describe how candidate models were evaluated and how the final model(s) were selected                                                                                                                                                                                  | Supplementary Methods, sections 3 and 4                               |
| 12                            | Provide the results of an evaluation of model performance, if done, as well as the results of any relevant sensitivity analysis                                                                                                                                        | Supplementary Methods, sections 3.3 and 4                             |
| 13                            | Describe methods for calculating uncertainty of the estimates. State which sources of uncertainty were, and were not, accounted for in the uncertainty analysis                                                                                                        | Supplementary Methods, sections 3.3, 3.4, and 4                       |
| 14                            | State how analytic or statistical source code used to generate estimates can be accessed                                                                                                                                                                               | Methods, the last paragraph                                           |
| <b>Results and Discussion</b> |                                                                                                                                                                                                                                                                        |                                                                       |
| 15                            | Provide published estimates in a file format from which data can be efficiently extracted                                                                                                                                                                              | Supplementary Methods, section 1.1                                    |
| 16                            | Report a quantitative measure of the uncertainty of the estimates (e.g. uncertainty intervals)                                                                                                                                                                         | Results, estimates are provided with 95% uncertainty intervals        |
| 17                            | Interpret results in light of existing evidence. If updating a previous set of estimates, describe the reasons for changes in estimates                                                                                                                                | Discussion, paragraphs 2–4                                            |
| 18                            | Discuss limitations of the estimates. Include a discussion of any modelling assumptions or data limitations that affect interpretation of the estimates                                                                                                                | Discussion, paragraphs 6–8<br>Supplementary Methods, sections 5 and 6 |

This appendix is supplemented to: “Age-, sex-, and risk-specific burden of neurological conditions in North Africa and Middle East from 1990 to 2019: A systematic analysis of the Global Burden of Disease Study 2019 data.”

Portions of this Supplementary Methods section are reproduced or adapted from appendices of methodological detail for “Global burden of 369 diseases and injuries in 204 countries and territories, 1990–2019: a systematic analysis for the Global Burden of Disease Study 2019”,<sup>1</sup> “Global burden of 87 risk factors in 204 countries and territories, 1990–2019: a systematic analysis for the Global Burden of Disease Study 2019”,<sup>2</sup> and Feigin et al.<sup>3</sup> Relevant references are provided separately at the end of the Supplementary Appendix.

## 1. Data

### 1.1. Data sources and outcome measures

The Global Burden of Diseases, Injuries, and Risk Factors Study 2019 (GBD 2019) gathered numerous data sources for each disease or injury to synthesise input sources to estimate different measures, including censuses, household surveys, civil registration and vital statistics, disease registries, health service use, air pollution monitors, satellite imaging, disease notifications, and other sources. These data sources were identified through a systematic literature review, data requests to international organisations and national agencies, and collaborations with GBD researchers and experts. The data sources were then harmonised and adjusted to account for different case definitions, diagnostic criteria, and reporting biases before being input into a statistical model.

For GBD 2019 estimates, data from 3686 vital registration sources, 147 verbal autopsy sources, 368 incidence sources, 117 prevalence sources, 229 excess mortality sources, 7753 risk factor exposure sources, and 2733 relative risk sources were used. Among these, 4474 sources belonged to all GBD measures in NAME. Among 2469 sources related to deaths and disabilities in NAME, those related to neurological conditions are summarised in Table S2 below. Additionally, there were 782 sources related to risk factors and 2067 sources related to covariates in NAME. GBD 2019 results are freely available via an interactive data downloading tool on [the Global Health Data Exchange \(GHDx\) GBD 2019 website](#) and [VizHub - GBD Results](#).

**Table S2. Global Burden of Disease Study 2019 (GBD 2019) data input sources counts for neurological conditions in North Africa and Middle East**

|                                         | Causes of death      |                            | Non-fatal health outcomes |                            |
|-----------------------------------------|----------------------|----------------------------|---------------------------|----------------------------|
|                                         | Total NAME citations | Total source metadata rows | Total NAME citations      | Total source metadata rows |
| Meningitis                              | 166                  | 346,261                    | 34                        | 1583                       |
| Encephalitis                            | 140                  | 171,678                    | 6                         | 318                        |
| Tetanus                                 | 146                  | 346,086                    | 5                         | 41                         |
| Brain and central nervous system cancer | 217                  | 302,124                    | 70                        | 19,680                     |
| Stroke                                  | 140                  | 569,984                    | 31                        | 935                        |
| Ischaemic stroke                        | 110                  | 134,136                    | 27                        | 387                        |
| Intracerebral haemorrhage               | 103                  | 132,032                    | 20                        | 313                        |
| Subarachnoid haemorrhage                | 103                  | 132,032                    | 12                        | 235                        |
| Neurological disorders*                 | 126                  | 727,916                    | 101                       | 3778                       |
| Alzheimer's disease and other dementias | N/A†                 | N/A†                       | 10                        | 91                         |
| Parkinson's disease                     | 123                  | 119,408                    | 8                         | 76                         |
| Idiopathic epilepsy                     | 126                  | 154,306                    | 34                        | 783                        |
| Multiple sclerosis                      | 123                  | 140,406                    | 30                        | 2323                       |
| Motor neuron disease                    | 116                  | 163,790                    | 2                         | 34                         |
| Headache disorders‡                     | 0                    | 0                          | 18                        | 471                        |
| Migraine                                | 0                    | 0                          | 18                        | 394                        |
| Tension-type headache                   | 0                    | 0                          | 9                         | 77                         |
| Other neurological disorders            | 110                  | 150,006                    | 0                         | 0                          |

**Table S2. Global Burden of Disease Study 2019 (GBD 2019) data input sources counts for neurological conditions in North Africa and Middle East**

|                  | Causes of death      |                            | Non-fatal health outcomes |                            |
|------------------|----------------------|----------------------------|---------------------------|----------------------------|
|                  | Total NAME citations | Total source metadata rows | Total NAME citations      | Total source metadata rows |
| Head injuries§   | N/A                  | N/A                        | N/A                       | N/A                        |
| Spinal injuries§ | N/A                  | N/A                        | N/A                       | N/A                        |

Note: The numbers indicate data specific to the North Africa and Middle-East (NAME) region. All data are retrievable via the [Global Burden of Disease Study 2019 \(GBD 2019\) Data Input Sources Tool | GHDx \(healthdata.org\)](https://ghdx.healthdata.org).

\*Neurological disorders included Alzheimer's disease and other dementias, Parkinson's disease, idiopathic epilepsy, multiple sclerosis, headache disorders (including migraine and tension-type headache), motor neuron disease, and other neurological disorders. †N/A, not available; we did not use any of the vital registration or verbal autopsy data for traditional CODEm analyses for dementia fatal modelling. ‡Headaches are not regarded as cause of deaths, and we do not describe deaths to headaches. §N/A, not available; Head/spinal injuries are N-coded injuries and not E-coded injuries. E-coded injuries were split amongst the 47 N-coded injuries using an E-N matrix. Therefore, the total non-fatal citations would have included all citations used for E-coded injuries estimation. There were no cause of death citations because deaths were attributed to E-coded injuries and not estimated for N-coded injuries.

The steps to identify and access the data include:

- Searching for published and unpublished data on neurological conditions from various sources, such as PubMed, Embase, Scopus, Web of Science, Google Scholar, and national and international databases and reports.
- Contacting experts and collaborators in the field of neurology and public health to obtain additional data and information.
- Approved access and intake by IHME data librarians of larger-scale surveys, censuses, registries, and vital registration data
- Screening the data for eligibility based on predefined inclusion and exclusion criteria, such as study design, population, case definition, and quality assessment.
- Extracting relevant data from the selected sources and entering them into a standardised data collection tool.
- Harmonising the data to account for different case definitions and methods of data collection, using a meta-regression approach.
- Inputting the data into a Bayesian hierarchical model called Disease-Model-Bayesian Meta-Regression (DisMod-MR) 2.1, which estimates the prevalence, incidence, mortality, and disability-adjusted life years (DALYs) of neurological conditions for each country, region, and super-region.

The inclusion and exclusion criteria in GBD 2019 vary depending on the type of data, the disease or injury, and the risk factor. In general, data has to be population representative, at least 150-person sample size, and meet the reference or an alternative case definition accepted by the GBD (eg, some conditions will use self-report data, some will not; some conditions will use hospital data or insurance claims data and some will not).

In order to accept non-reference case definition data to bolster the number of studies and diversities of geographies included in our analyses, we used meta-regression analyses to determine whether we can systematically adjust non-reference data to reference. This is described in more detail in section 2. For example, our case definition for epilepsy specifies active epilepsy, but we accepted studies that look at lifetime recall of epilepsy diagnosis, and then systematically adjusted these data down. For dementia, we accepted non-reference criteria such as the 10/66 algorithm, NIA-AA criteria, or clinical records, and systematically adjusted these as described in section 3.2.



The Bayesian meta-regression methods are integral for modelling cause-specific mortality and morbidity, addressing data heterogeneity among different data sources and between countries, and handling uncertainties and the dynamic nature of global health.<sup>4</sup> These methods have allowed the integration of diverse data sources, the inclusion of expert priors such as age restrictions or remission rates, and the inclusion of predictive covariates and random effects (generally by geography). Please see the appendix sections 3.1 and 3.2 on fatal and non-fatal methods overviews. We have also included examples for dementia prevalence estimation and epilepsy death estimation in these sections.

The GBD study utilised a combination of expert opinion, literature reviews, and available data to inform the priors in their Bayesian models. These priors served as the initial assumptions about the distribution of parameters before incorporating the observed data. The specifics varied across different risk factors and diseases. The priors used in the GBD 2019 study were based on a variety of sources, including published literature, publicly available data, and contributed data. The rationale for using these priors was to incorporate as much relevant information as possible into the models, while also ensuring that the models are robust and reliable. The priors helped to guide the models, especially in situations where the data may be sparse or uncertain. In the Bayesian meta-regression tool DisMod-MR 2.1 used in GBD 2019, some prior distributions were revised based on simulation studies showing that less informative priors helped to improve the coverage of uncertainty intervals. This indicates that the choice of priors was guided by a desire to improve the accuracy and reliability of the estimates. The priors used in the GBD 2019 study were not explicitly elicited in the way that priors were sometimes elicited in other contexts, such as through expert elicitation methods. Instead, the priors were derived from a variety of data sources, including censuses, household surveys, civil registration and vital statistics, disease registries, health service use, air pollution monitors, satellite imaging, disease notifications, and other sources. This approach allowed for a comprehensive and systematic assessment of the available data, which is crucial for a study of this scale and complexity. This framework inherently involved updating priors with new data to generate posterior distributions.

For input data sources, GBD 2019 included studies that met the following criteria:

- Reported primary data on mortality, prevalence, incidence, or severity of a disease, injury, or risk factor
- Used a representative sample of the population of interest (including people of both sexes and all ages living in countries of NAME)
- Used a standardised and validated measurement tool or diagnostic criteria
- Reported age- and sex-specific data or provided enough information to disaggregate by age and sex
- Reported uncertainty estimates or provided enough information to calculate them

For risk-outcome pairs, GBD 2019 included those that met the following criteria:

- Had convincing or probable evidence of a causal relationship based on specific criteria such as the criteria of the World Cancer Research Fund or the Bradford Hill criteria
- Had at least one meta-analysis of epidemiological studies that estimated the relative risk of the outcome associated with the risk factor
- Had sufficient data on the exposure distribution and the outcome burden to estimate the population attributable fraction

For ad-hoc exclusions, GBD 2019 excluded some data sources or risk-outcome pairs that did not meet the quality standards or had major limitations. For example, GBD 2019 excluded data sources that had implausible values, high heterogeneity, or inconsistent trends. We vetted data and results with geographical expert collaborators to confirm study quality, and that many conditions employed systematic outlier methods (eg, for clinical data, outliers identified if age-standardised incidence or prevalence is more than two median absolute deviations from the median age-standardised incidence or prevalence across location-years).

Core summary results include deaths, years of life lost (YLLs), years lived with disability (YLDs), disability-adjusted life years (DALYs), prevalence, incidence, life expectancy, healthy life expectancy (HALE), causes of death and illness, risk factor-attributed DALYs and deaths, and some other measures. Data are categorised according to age (including numerous age groups), sex (including males, females, and both sexes), risk factor (including 87 modifiable risk factors), year (including annual results for all measures from 1990 to 2019), and location (including 21 regions and 204 nations) with different metrics (including absolute number, rate per 100,000, and percent). We have compared results for neurological diseases in North Africa and Middle East with the rest of the world.

### 1.2. Regions and nations

We have compared results for neurological conditions in North Africa and Middle East with other regions in the world. GBD produces estimates for 204 countries and territories grouped into 21 regions and seven super-regions (Table S3). The seven GBD super-regions are central Europe, eastern Europe, and central Asia; high income; Latin America and the Caribbean; North Africa and Middle East; South Asia; southeast Asia, east Asia, and Oceania; and sub-Saharan Africa. The list of countries in each region is as follows:

| <b>Table S3. Global Burden of Disease Study 2019 (GBD 2019) classification of countries and regions</b> |                                                                                                                                                                                                                                                                                                                                                                                                                                                                                                                                                                                                                                                                                                                                                                            |
|---------------------------------------------------------------------------------------------------------|----------------------------------------------------------------------------------------------------------------------------------------------------------------------------------------------------------------------------------------------------------------------------------------------------------------------------------------------------------------------------------------------------------------------------------------------------------------------------------------------------------------------------------------------------------------------------------------------------------------------------------------------------------------------------------------------------------------------------------------------------------------------------|
| <b>GBD super regions</b>                                                                                | <b>GBD classified sub-regions and nations</b>                                                                                                                                                                                                                                                                                                                                                                                                                                                                                                                                                                                                                                                                                                                              |
| The North Africa and Middle East                                                                        | <ul style="list-style-type: none"> <li>• The Middle-East: Afghanistan, Bahrain, Iran (Islamic Republic of), Iraq, Jordan, Kuwait, Lebanon, Libya, Palestine, Oman, Qatar, Saudi Arabia, Syrian Arab Republic, Türkiye (Turkey), United Arab Emirates, Yemen;</li> <li>• North Africa: Algeria, Egypt, Morocco, Sudan, Tunisia;</li> </ul>                                                                                                                                                                                                                                                                                                                                                                                                                                  |
| Southeast Asia, East Asia, and Oceania                                                                  | <ul style="list-style-type: none"> <li>• East Asia: China, the Democratic People's Republic of Korea, Taiwan (Province of China);</li> <li>• Southeast Asia: Cambodia, Indonesia, Lao People's Democratic Republic, Malaysia, Maldives, Myanmar, Philippines, Sri Lanka, Thailand, Timor-Leste, Viet Nam;</li> <li>• Oceania: American Samoa, Cook Islands, Fiji, Guam, Kiribati, Marshall Islands, Micronesia (Federated States of), Nauru, Niue, Northern Mariana Islands, Palau, Papua New Guinea, Samoa, Solomon Islands, Tokelau, Tonga, Tuvalu, Vanuatu;</li> </ul>                                                                                                                                                                                                  |
| South Asia                                                                                              | <ul style="list-style-type: none"> <li>• South Asia comprises Bangladesh, Bhutan, India, Nepal, and Pakistan;</li> </ul>                                                                                                                                                                                                                                                                                                                                                                                                                                                                                                                                                                                                                                                   |
| Sub-Saharan Africa                                                                                      | <ul style="list-style-type: none"> <li>• Central Sub-Saharan Africa: Angola, Central African Republic, Congo, Democratic Republic of the Congo, Equatorial Guinea, and Gabon;</li> <li>• Eastern Sub-Saharan Africa: Burundi, Comoros, Djibouti, Eritrea, Ethiopia, Kenya, Madagascar, Malawi, Mauritius, Mozambique, Rwanda, Seychelles, Somalia, South Sudan, United Republic of Tanzania, Uganda, Zambia;</li> <li>• Southern Sub-Saharan Africa: Botswana, Eswatini, Lesotho, Namibia, South Africa, Zimbabwe;</li> <li>• Western Sub-Saharan Africa: Benin, Burkina Faso, Cameroon, Cabo Verde, Chad, Côte d'Ivoire, Gambia, Ghana, Guinea, Guinea-Bissau, Liberia, Mali, Mauritania, Niger, Nigeria, Sao Tome and Principe, Senegal, Sierra Leone, Togo).</li> </ul> |
| Latin America and Caribbean                                                                             | <ul style="list-style-type: none"> <li>• Caribbean: Antigua and Barbuda, Bahamas, Barbados, Belize, Bermuda, Cuba, Dominica, Dominican Republic, Grenada, Guyana, Haiti, Jamaica, Puerto Rico, Saint Kitts and Nevis, Saint Lucia, Saint Vincent and the Grenadines, Suriname, Trinidad and Tobago, United States Virgin Islands;</li> </ul>                                                                                                                                                                                                                                                                                                                                                                                                                               |

| <b>Table S3. Global Burden of Disease Study 2019 (GBD 2019) classification of countries and regions</b> |                                                                                                                                                                                                                                                                                                                                                                                                                                                                                                                                                                                                                |
|---------------------------------------------------------------------------------------------------------|----------------------------------------------------------------------------------------------------------------------------------------------------------------------------------------------------------------------------------------------------------------------------------------------------------------------------------------------------------------------------------------------------------------------------------------------------------------------------------------------------------------------------------------------------------------------------------------------------------------|
| <b>GBD super regions</b>                                                                                | <b>GBD classified sub-regions and nations</b>                                                                                                                                                                                                                                                                                                                                                                                                                                                                                                                                                                  |
|                                                                                                         | <ul style="list-style-type: none"> <li>• Andean Latin America: Bolivia (Plurinational State of), Ecuador, Peru;</li> <li>• Central Latin America: Colombia, Costa Rica, El Salvador, Guatemala, Honduras, Mexico, Nicaragua, Panama, Venezuela (Bolivarian Republic of);</li> <li>• Tropical Latin America: Brazil, Paraguay;</li> </ul>                                                                                                                                                                                                                                                                       |
| Central Europe, Eastern Europe, and Central Asia                                                        | <ul style="list-style-type: none"> <li>• Central Asia: Armenia, Azerbaijan, Georgia, Kazakhstan, Kyrgyzstan, Mongolia, Tajikistan, Turkmenistan, and Uzbekistan;</li> <li>• Central Europe: Albania, Bosnia and Herzegovina, Bulgaria, Croatia, Czechia, Hungary, North Macedonia, Montenegro, Poland, Romania, Serbia, Slovakia, Slovenia;</li> <li>• Eastern Europe: Belarus, Estonia, Latvia, Lithuania, Republic of Moldova, Russian Federation, Ukraine;</li> </ul>                                                                                                                                       |
| High-income                                                                                             | <ul style="list-style-type: none"> <li>• High-income Asia Pacific: Brunei Darussalam, Japan, the Republic of Korea, and Singapore;</li> <li>• Australasia: Australia, and New Zealand;</li> <li>• Western Europe: Andorra, Austria, Belgium, Cyprus, Denmark, Finland, France, Germany, Greece, Iceland, Ireland, Israel, Italy, Luxembourg, Malta, Monaco, Netherlands, Norway, Portugal, San Marino, Spain, Sweden, Switzerland, United Kingdom;</li> <li>• Southern Latin America: Argentina, Chile, Uruguay;</li> <li>• High-income North America: Canada, Greenland, United States of America;</li> </ul> |

There are some variations between the GBD 2019 and the World Bank in classifying countries of North Africa and Middle Eastern area. The GBD 2019 classified Israel among high-income Western European nations; and Sudan among Eastern Sub-Saharan African nations. The World Bank classifies Türkiye among European and Central Asian nations; Afghanistan among South Asian nations; and Djibouti and Malta among Middle Eastern and North African nations. It is worth noting that the GBD classification differed from the World Health Organization or the World Bank classification of countries in this region, which is usually abbreviated to MENA.

### **1.3. GBD 2019 neurological data changes**

The GBD 2019 categorisation did not change compared to the GBD 2017 in terms of neurological disorders, which both include Alzheimer's disease and other dementias, Parkinson's disease, idiopathic epilepsy, multiple sclerosis, headache disorders (including migraine and tension-type headache), motor neuron disease, and other rare neurological disorders. However, as with the previous GBD study of neurological disorders,<sup>5</sup> we added data on stroke (including ischaemic stroke, haemorrhagic stroke, and subarachnoid haemorrhage), meningitis, encephalitis, tetanus, head injuries and spinal injuries.

### **1.4. Literature search**

To evaluate the availability of evidence on the burden of neurological conditions among 21 countries of NAME, we did a review of the published scientific literature in PubMed for relevant reports published in any language up to January 1, 2024, using the following search terms:

*“(encephalitis[ti] OR meningitis[ti] OR tetanus[ti] OR ((brain[ti] OR central nervous system[ti]) cancer[ti]) OR head injur\*[ti] OR spinal injur\*[ti] OR stroke[ti] OR subarachnoid haemorrhage[ti] OR subarachnoid hemorrhage[ti] OR Alzheimer\*[ti] OR dementias[ti] OR Parkinson\*[ti] OR epilepsy[ti] OR multiple sclerosis[ti] OR headache[ti] OR migraine[ti] OR motor neuron disease[ti] OR Amyloid lateral sclerosis[ti] OR neurological*

*disorder\*[tw] OR neurological disease\*[tw]) AND (Middle East[ti] OR north Africa[ti] OR Afghanistan[ti] OR Algeria[ti] OR Bahrain[ti] OR Egypt[ti] OR Iran[ti] OR Iraq[ti] OR Jordan[ti] OR Kuwait[ti] OR Lebanon[ti] OR Libya[ti] OR Morocco[ti] OR Palestine[ti] OR Oman[ti] OR Qatar[ti] OR Saudi Arabia[ti] OR Sudan[ti] OR Syria\*[ti] OR Tunisia[ti] OR Turkey[ti] OR Türkiye[ti] OR Emirates[ti] OR Yemen[ti]) AND (Population based[tw] OR community based[tw] OR community dwelling\*[tw] OR population wide[tw]) AND (burden[tw] OR disability[tw] OR mortality[tw] OR death\*[tw] OR inciden\*[tw] OR prevalen\*[tw] OR dalys[tw] OR ylls[tw] OR ylds[tw] OR “population attributable fraction”[tw] OR risk factor\*[tw]).”*

## 2. Methodological summary of neurological conditions and definition of risk factors

GBD reference definitions for all conditions included in this analysis are listed in Table S4 and risk factor exposure in Table S5 (using definitions from GBD 2019 capstone appendices). Twenty risk factors were categorised into four levels (Table S6).

| <b>Condition</b>                        | <b>GBD case definition</b>                                                                                                                                                                                                                                                                                                                                                                                                                                                                 |
|-----------------------------------------|--------------------------------------------------------------------------------------------------------------------------------------------------------------------------------------------------------------------------------------------------------------------------------------------------------------------------------------------------------------------------------------------------------------------------------------------------------------------------------------------|
| Brain and central nervous system cancer | Malignant neoplasms of the brain and central nervous system using the ICD-10 classification system.                                                                                                                                                                                                                                                                                                                                                                                        |
| Dementia                                | A progressive, degenerative, and chronic neurological disorder typified by memory impairment and other neurological dysfunctions. The case definition is either the DSM-III, IV, or V, or ICD classification.                                                                                                                                                                                                                                                                              |
| Encephalitis                            | A disease caused by acute inflammation of the brain. The case definition follows ICD-10 diagnostic criteria.                                                                                                                                                                                                                                                                                                                                                                               |
| Epilepsy (idiopathic)                   | A condition characterised by recurrent (2+) epileptic seizures, unprovoked by any immediate identified cause. The case definition follows the International League Against Epilepsy (ILAE) definition for active epilepsy, which stipulates one epileptic seizure in the previous five years, regardless of antiepileptic drug treatment. Idiopathic epilepsy refers to epilepsy of unknown origin (as opposed to secondary epilepsy due to conditions such as stroke, brain injury, etc). |
| Meningitis                              | A disease caused by inflammation of the meninges, which is the protective membrane surrounding the brain and spinal cord. It is typically caused by an infection in the cerebrospinal fluid. Meningitis includes viral meningitis and bacterial meningitis, and the case definition follows ICD-10 diagnostic criteria.                                                                                                                                                                    |
| Migraine                                | A disabling primary headache disorder characterised by recurrent moderate or severe unilateral pulsatile headaches. The case definition follows the International Classification of Headache Disorders (ICHD)-3.                                                                                                                                                                                                                                                                           |
| Motor neuron disease                    | A set of chronic, degenerate, and progressive neurological conditions typified by the destruction of motor neurons and subsequent deterioration of voluntary muscle activity, the most common form of which is amyotrophic lateral sclerosis (ALS). The case definition follows the El Escorial criteria.                                                                                                                                                                                  |
| Multiple sclerosis                      | A chronic, degenerative, and progressive neurological condition typified by damage to the myelin sheaths. The case definition follows McDonald’s criteria, though other criteria such as Poser or Schumacher are also treated as reference, as is clinical neurological exam diagnosis.                                                                                                                                                                                                    |

**Table S4. Neurological conditions included in the present study and their definitions based on the Global Burden of Disease Study 2019 (GBD 2019)**

| Condition                    | GBD case definition                                                                                                                                                                                                                                                                                                                     |
|------------------------------|-----------------------------------------------------------------------------------------------------------------------------------------------------------------------------------------------------------------------------------------------------------------------------------------------------------------------------------------|
| Other neurological disorders | A residual category of neurological conditions not explicitly estimated in the GBD 2019 studies. These broadly include movement disorders, peripheral nerve disorders, myopathies, degenerative disorders, and others. These conditions are identified via ICD-9 and ICD-10 coding (in death data).                                     |
| Parkinson's disease          | A chronic, degenerative, and progressive neurological condition typified by loss of motor mobility and control - most notably tremors. The case definition follows the Gelb Criteria and requires the presence of at least two of the four primary symptoms (tremors, bradykinesia, stiffness of limbs and torso, posture instability). |
| Spinal cord injury           | This is an N-coded injury (nature of injury) that includes spinal cord lesion at or below the neck level.                                                                                                                                                                                                                               |
| Stroke                       | Defined according to World Health Organization (WHO) criteria. First-ever ischaemic stroke, intracerebral haemorrhage, and subarachnoid haemorrhage were defined from the day of incidence through 28 days and separately modelled survival beyond 28 days. <sup>3</sup>                                                                |
| Tension-type headache        | A headache condition characterised by dull, non-pulsatile, diffuse, band-like pain of mild to moderate intensity in the head or neck. Classification follows ICHD-3.                                                                                                                                                                    |
| Traumatic brain injury       | This is an N-coded injury (nature of injury) that involves injury to the head that can lead to short-term and in some cases long-term damage to the brain.                                                                                                                                                                              |

Note: Details of input data and methods for estimation of epidemiological figures of neurological conditions are available in Appendix 1 of the article: Global burden of 369 diseases and injuries in 204 countries and territories;<sup>1</sup> on pages 305–307 for idiopathic epilepsy, pages 693–703 for meningitis, pages 704–711 for encephalitis, pages 718–720 for tetanus, pages 835–843 for strokes and its subtypes (including ischaemic stroke, intracerebral haemorrhage, and subarachnoid haemorrhage), pages 295–299 and 963–971 for Alzheimer's disease and other dementias, pages 300–304 and 972–978 for Parkinson's disease, pages 308–301 and 979–986 for multiple sclerosis, pages 309–313 and 987–993 for motor neuron disease, pages 994–1002 for headache disorders (including migraine and tension-type headache), pages 304–316 and 1003 for other neurological disorders, and pages 1350–1361 for head/spinal injuries.<sup>1</sup>

**Table S5. Risk factor exposure definitions in the Global Burden of Disease Study 2019**

| Risk factors                         | Exposure definition                                                                                                                                                                                                                                                                                           |
|--------------------------------------|---------------------------------------------------------------------------------------------------------------------------------------------------------------------------------------------------------------------------------------------------------------------------------------------------------------|
| Ambient particulate matter pollution | population-weighted annual average mass concentration of particulate matter <2.5 mm in diameter (PM <sub>2.5</sub> ) in a cubic metre of air >2.4-5.9 mg/m <sup>3</sup> .                                                                                                                                     |
| Dietary risks                        | a composite risk factor consisting of suboptimal exposure to dietary factors including fruits, vegetables, whole grains, nuts and seeds, fibre, omega-3 fatty acids, polyunsaturated fatty acids, calcium, milk, legumes, red meat, processed meat, sugar-sweetened beverages, trans fatty acids, and sodium. |
| High alcohol use                     | grams per day of pure alcohol consumed among current drinkers greater than the age-, sex-, and region-specific TMREL.                                                                                                                                                                                         |
| High body mass index                 | body mass index >20-23 kg/m <sup>2</sup> in adults >20 years of age.                                                                                                                                                                                                                                          |

| <b>Risk factors</b>                            | <b>Exposure definition</b>                                                                                                                                                                                                  |
|------------------------------------------------|-----------------------------------------------------------------------------------------------------------------------------------------------------------------------------------------------------------------------------|
| High fasting plasma glucose                    | serum fasting plasma glucose >4.9-5.3 mmol/L in adults >25 years of age.                                                                                                                                                    |
| High low-density lipoprotein (LDL) cholesterol | LDL-cholesterol >0.9-1.4 mmol/L in adults >25 years of age.                                                                                                                                                                 |
| High systolic blood pressure                   | brachial systolic blood pressure (SBP) >105-115 mm Hg in adults >25 years of age.                                                                                                                                           |
| High temperature                               | exposure to temperatures warmer than the temperature associated with the lowest overall mortality attributable to the risk, in a given location and year.                                                                   |
| Household air pollution from solid fuels       | proportion of individuals exposed to >2.4-5.9 mg/m <sup>3</sup> of PM <sub>2.5</sub> due to the use of solid fuels for cooking, including coal, charcoal, wood, agricultural residue, and animal dung.                      |
| Kidney dysfunction                             | estimated glomerular filtration rate <60 mL/min/1.73 m <sup>2</sup> and/or albumin-to-creatinine ratio ≤30 mg/g.                                                                                                            |
| Lead exposure                                  | micrograms of lead per gram of bone greater than the age-specific theoretical minimum risk exposure level (TMREL).                                                                                                          |
| Low physical activity                          | physical activity performed by adults >25 years of age, for at least 10 minutes at a time, across all domains of life (leisure/recreation, work/household, and transport) <3000-4500 metabolic equivalent minutes per week. |
| Low temperature                                | exposure to temperatures colder than the temperature associated with the lowest overall mortality attributable to the risk, in a given location and year.                                                                   |
| Secondhand smoke                               | current exposure of nonsmokers to secondhand tobacco smoke at home, at work, or in other public places.                                                                                                                     |
| Smoking                                        | current or former users of any smoked tobacco product on a daily or occasional basis.                                                                                                                                       |

| <b>Level 1</b>           | <b>Level 2</b>                                                                                                                    | <b>Level 3</b>                                                                                                                             | <b>Level 4</b>                      |
|--------------------------|-----------------------------------------------------------------------------------------------------------------------------------|--------------------------------------------------------------------------------------------------------------------------------------------|-------------------------------------|
| Metabolic risk factors   | High systolic blood pressure<br>High LDL cholesterol<br>High fasting plasma glucose<br>High body-mass index<br>Kidney dysfunction |                                                                                                                                            |                                     |
| Behavioural risk factors | Child and maternal malnutrition<br><br>Tobacco<br><br>Dietary risks                                                               | Low birth weight and short gestation<br><br>Smoke<br>Secondhand smoke<br>Diet high in red meat<br>Diet high in sodium<br>Diet low in fibre | Low birth weight<br>Short gestation |

| <b>Table S6. Classification of risk factors in the Global Burden of Disease Study 2019 (GBD 2019)</b>                                                                                                                                                                                      |                                      |                                                                          |                                                                                            |
|--------------------------------------------------------------------------------------------------------------------------------------------------------------------------------------------------------------------------------------------------------------------------------------------|--------------------------------------|--------------------------------------------------------------------------|--------------------------------------------------------------------------------------------|
| <b>Level 1</b>                                                                                                                                                                                                                                                                             | <b>Level 2</b>                       | <b>Level 3</b>                                                           | <b>Level 4</b>                                                                             |
|                                                                                                                                                                                                                                                                                            |                                      | Diet low in fruits<br>Diet low in vegetables<br>Diet low in whole grains |                                                                                            |
|                                                                                                                                                                                                                                                                                            | Low physical activity<br>Alcohol use |                                                                          |                                                                                            |
| Environmental/<br>Occupational risk factors                                                                                                                                                                                                                                                | Air pollution                        | Particulate matter<br>pollution                                          | Ambient particulate<br>matter pollution<br><br>Household air pollution<br>from solid fuels |
|                                                                                                                                                                                                                                                                                            | Non-optimal temperature              | Low temperature<br>High temperature                                      |                                                                                            |
|                                                                                                                                                                                                                                                                                            | Other environmental risks            | Lead exposure                                                            |                                                                                            |
| Global Burden of Disease Study 2019 categorises 87 risk factors into three level 1 risk factors, 20 level 2 risk factors, 41 level 3 risk factors, and 22 level 4 risk factors. Risk factors lacking sufficient or quality data related to any neurological condition are not listed here. |                                      |                                                                          |                                                                                            |

Although details of modelling methods can vary by condition, standard methods are as follows:

We accepted data for a given disease that meets our gold standard (reference) case definition as well as alternate case definitions (eg, for epilepsy, our gold standard is active epilepsy, but we accepted studies that look at lifetime recall). Then, we used a meta-regression to systematically adjust non-reference case definition data to the reference. In that way, we could include data that were collected using heterogeneous methods. To determine how much each alternative case definition should be adjusted, we used a tool called MR-BRT (meta-regression: Bayesian, Regularized, Trimmed).<sup>6</sup> A meta-regression is like a meta-analysis, but includes covariates (fixed and random effects), and accounts for dependent variable uncertainty (measurement error). MR-BRT combines functionality for linear regressions, mixed effects models, meta-analyses, Bayesian priors, and flexible model fits with splines. It also allows for outlier trimming using a likelihood estimator and for automated covariate selection. We used log ratio or logit difference network or intercept-only meta-analyses. Input data consisted of the logit difference between matched pairs of data with different case definitions from similar geographies and collection periods for a given measure (eg, prevalence). Model results were used to adjust non-reference case definition data to the reference.

Data that are not sex-specific or provided in greater than 25-year age bins are sex- and/or age split. To split “both sex” data into male and female, we borrowed information from other studies in the dataset that provided male and female prevalence or incidence. We used the ratio of within-study male to female prevalence or incidence from these other studies as input to a meta-regression model to calculate the average proportion male and female, and applied this to “both sex” data after accounting for population structure (eg, some countries have higher proportion of males or females in their respective populations for different age groups). The following equations were used:

Male prevalence:

$$Prevalence_{male} = prevalence_{both} * (population_{both} / (population_{male} + ratio * population_{female}))$$

Female prevalence:

$$Prevalence_{female} = ratio * prevalence_{male}$$

We then splitted data with greater than 25-year age bins into 5-year age bins using the global age pattern from an initial DisMod-MR model where only granular age data were used as inputs.

Then, we input all data into a DisMod-MR model and got an initial global fit across all data regardless of collection year or geography. At this stage, we also got coefficients for predictive covariates. The global fit was passed down to super-region models as a prior, and models were run for each super-region with input data only from the respective super-region – then the same for regions and for countries. Random effects on location inform whether the prior passed down from the previous level of the geographic cascade should be higher or lower than the original fit. In this way, data from all locations informed the model fitted for North Africa and Middle East, in combination with data specific to North Africa and Middle East countries, and the data was harmonised prior to model input to account for differing case definitions.

### 3. Modelling

#### 3.1. Fatal disease modelling

The Cause Of Death Ensemble modelling (CODEm) framework was used to model most cause-specific death rates and Years of Life Lost (YLLs) owing to premature mortality, which relies on four key components:

- Data identification and gathering to have some signal of the true epidemiological process.
- Development of plausible models to predict well-documented associations in the estimates.
- Assessment of the out-of-sample predictive validity for all individual models, which are ranked for use in the ensemble modelling stage.
- Evaluation and selection of the best model with the highest out-of-sample predictive validity.

To develop pool models in the CODEm framework, four statistical models were used including linear mixed effects regression (LMER) models of the natural log of the cause-specific death rate, LMER models of the logit of the cause fraction, spatiotemporal Gaussian process regression (ST-GPR) models of the natural logarithm of the cause-specific death rate, and ST-GPR models of the logit of the cause fraction. Implausible signs on coefficients or unstable coefficients may strengthen multi-collinearity between covariates. Therefore, each combination is tested for statistical significance (covariate coefficients with a p-value < 0.05) and plausibility (the coefficients with expected directions as to the literature). We used Markov Chain Monte Carlo (MCMC) for DisMod, Logit Model Regression (LMR) for MR-BRT, and ensemble approach for CODEm where component models were a combination of mixed-effect models and space-time Gaussian process regression models. For most of the conditions in the current study, we used DisMod to get prevalence and incidence. We ran 5000 samples in DisMod and used the final 1000 for estimation.

For fatal modelling, deaths for most conditions included in our analysis were estimated using CODEm. Input data consists primarily of ICD-9 or ICD-10 coded vital registration data, supplemented in some cases by verbal autopsy data, police records, or registry data. Insufficiently defined ICD-coded data were redistributed to other underlying causes, and data went through noise-reduction to account for variation in temporal trends due to small numbers. Linear mixed-effect component models were run with all input data and used to select covariates significantly associated with the disease outcome. A subset of subsequent models run space-time smoothing, which leads to additional smoothing by borrowing information over space, time, and age, and Gaussian Process Regression that improves predictions for locations where input data were available. Component models were assessed for performance (root mean squared error and percent of correct predictions of time trend from adjacent points) and were weighted in a final ensemble model that maximises out-of-sample predictive validity. Final model uncertainty comes from regression parameters, variance around input data appoints, and heterogeneity of component models.



**3.1.1 Modelling steps for idiopathic epilepsy death estimation (as an example of fatal modelling processes)**

ICD-9 and ICD-10 coded vital registration and verbal autopsy data as well as China mortality surveillance data were input into CODem models. Separate models were run for male and female. Predictive covariates added to the model included (Table S7):

| <b>Level</b> | <b>Covariate</b>                      | <b>Direction</b> |
|--------------|---------------------------------------|------------------|
| 1            | Pigs (per capita)                     | +                |
|              | SEV scalar: epilepsy                  | +                |
|              | Mean systolic blood pressure (mmHg)   | +                |
| 2            | Health access and quality index       | -                |
|              | Mean body mass index                  | +                |
|              | Mean serum total cholesterol (mmol/L) | +                |
| 3            | Cumulative cigarettes (10 years)      | +                |
|              | Cumulative cigarettes (5 years)       | +                |
|              | Education (years per capita)          | -                |
|              | Log LDI (per capita)                  | -                |
|              | Socio-demographic Index               | -                |

Note: The level signifies strength of the evidence of association, where covariates with the strongest link to epilepsy are level 1, etc. The direction provides prior knowledge for the expected relationship, for example higher systolic blood pressure is expected to be predictive of more epilepsy deaths.

Covariates were added to mixed effect models sequentially and retained if they were significantly associated with the outcome (eg, epilepsy deaths). The final set of covariates selected by the model and their respective influence included systolic blood pressure, socio-demographic index, pigs (per capita), mean body mass index, the log-transformed SEV scalar for idiopathic epilepsy, healthcare access and quality index, education (years per capita), lag-distributed income (per capita), and cumulative cigarettes (5 and 10 years). An example plot of the relative influence of these covariates in one of the final ensemble models for idiopathic epilepsy is displayed below:

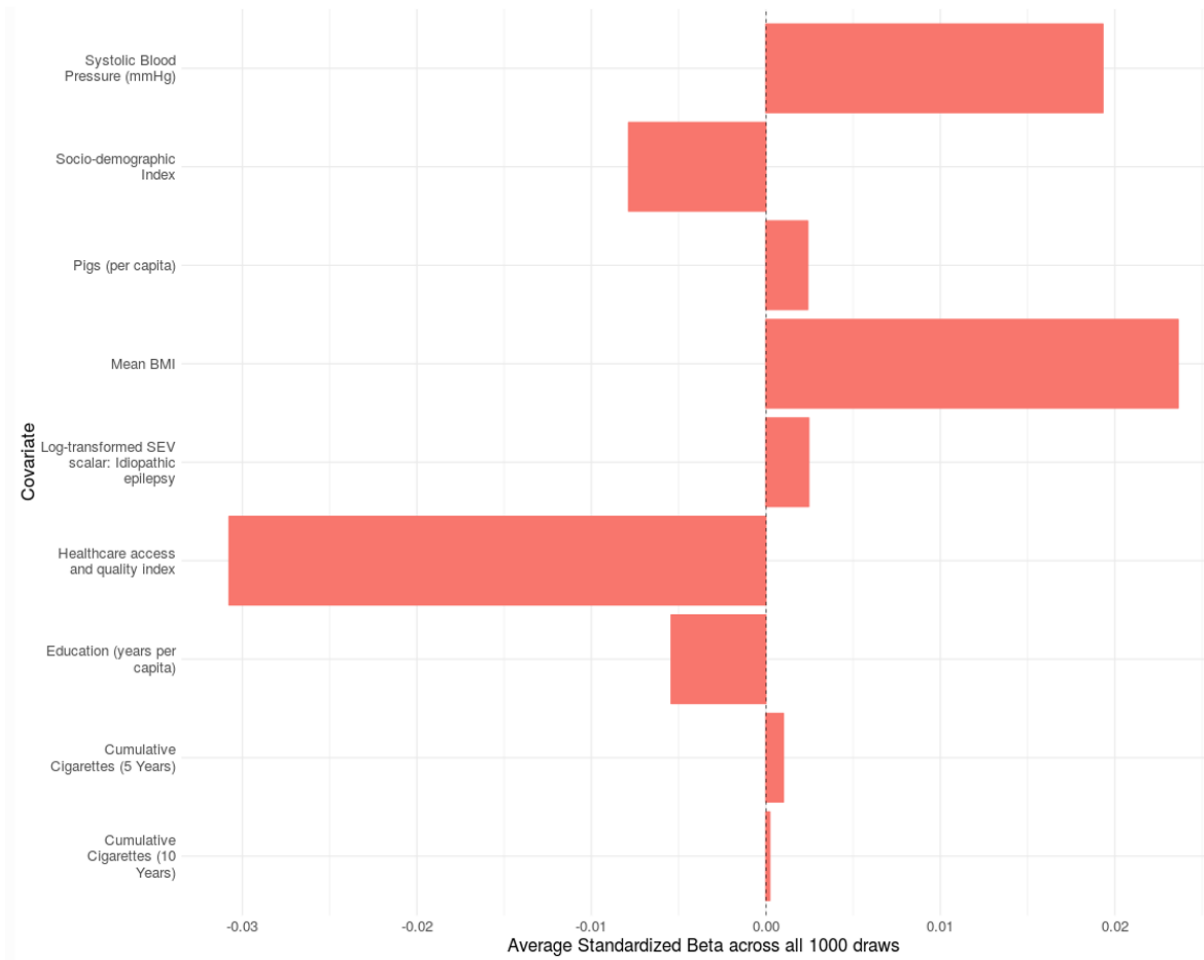

Figure S1. Plot of the relative influence of covariates for idiopathic epilepsy

The flowchart for epilepsy death and YLL modelling is shown below:

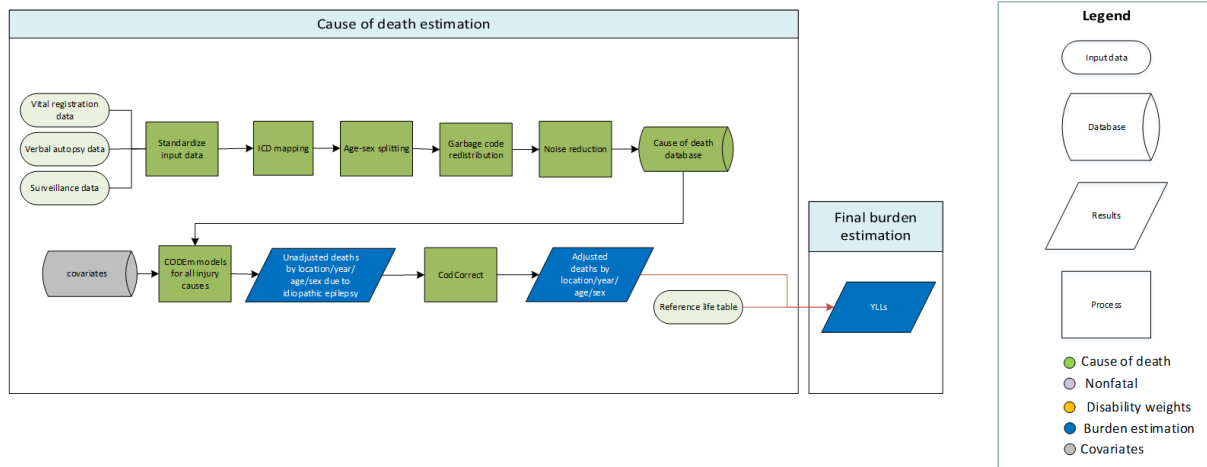

Figure S2. Flowchart of modelling steps to epilepsy-related death and years of life lost (YLLs)

### 3.2. Non-fatal disease modelling

The best available data on incidence, prevalence, and mortality were gained to estimate the burden of non-fatal neurological conditions. Estimates of the incidence, prevalence, and Years Lived with Disability (YLDs) of neurological conditions were generated with the DisMod-MR modelling tool version 2.1. DisMod-MR is a Bayesian geospatial disease modelling software that uses data on diverse parameters associated with each disease, the epidemiological relationships between the parameters, and geospatial relationships to produce estimates. We input data into either a single-parameter or compartmental DisMod-MR model and get an initial global fit across all data regardless of collection year or geography. At this stage, we also get coefficients for predictive covariates. Then, the global fit is passed down to super-region models as a prior, and models were run for each super-region, such as NAME, with input data only from the respective super-region – then the same for regions and for countries. Random effects on location inform whether the prior passed down from the previous level of the geographic cascade should be higher or lower than the original fit. Once models were fit for the lowest level of geography (national or subnational), final models were produced by aggregating - for example, the final prevalence model for the NAME region is the aggregate across all countries within NAME.

Of note, DisMod-MR does not produce YLDs, but the prevalence generated from DisMod is used to split total prevalence by disease into different severities, for instance, dementia is split into mild, moderate, and severe dementia, and then respective disability weights for each severity-specific health state is multiplied by prevalence by year-age-sex-location to get YLDs. Disability weights were produced using population-based surveys asking participants to make pairwise comparisons of the severity of different health states.<sup>7</sup>

#### 3.2.1. Modelling steps for non-fatal dementia estimation (as an example of non-fatal modelling processes)

Dementia is an example that includes the key standard techniques of data collection, adjustment of non-reference case definition data, sex splitting, age splitting, severity splitting, and multiplying by DWs to get YLDs (flow diagram).

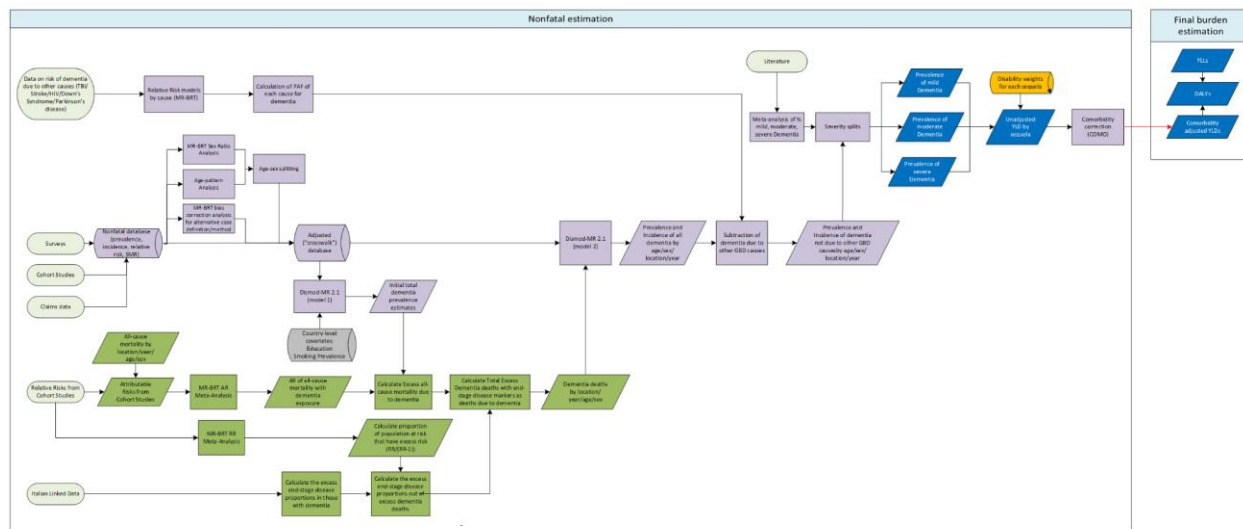

Figure S3. Flowchart of modelling steps for non-fatal dementia estimation

We estimated total dementia prevalence and incidence using DisMod-MR. Data on prevalence or incidence from population-based studies were identified via systematic review or expert collaborator advice. We used the Diagnostic and Statistical Manual of Mental Disorders (DSM) III, IV or V or ICD case definitions as the reference.

The DSM definition includes a combination of cognitive and functional deficits. Screening instruments were heterogeneous and included the Mini Mental State Examination (MMSE), Clinical Dementia Rating scale (CDR), and the Geriatric Mental State (GMS). Incidence data were included in dementia modelling for the first time in GBD 2019; previously only prevalence data were used. “Both” sex data and wide age-bin data were sex split and age split as described in section 2. Non-reference case definitions were adjusted to the gold standard. These included:

- Diagnosis based on the result of an algorithm
- Diagnosis from general practitioner data
- Diagnosis based on clinical records
- Diagnosis with the 10/66 algorithm
- Diagnosis with the NIA-AA criteria

To adjust non-reference data, we performed a logit difference network crosswalk using meta-regression-Bayesian, Regularized, Trimmed (MR-BRT). Model inputs were the logit difference between data using different case definitions matched by sex, measure, location, and approximately the same age and years of collection. The results of this analysis are displayed in Table S8 below:

| <b>Table S8. Results of non-reference adjusted meta-regression analysis for dementia estimations</b>                                                                                                                                                                                                                                                                                                                                                                                                                                                                                                                                                                                                        |                                                 |              |                                          |                           |
|-------------------------------------------------------------------------------------------------------------------------------------------------------------------------------------------------------------------------------------------------------------------------------------------------------------------------------------------------------------------------------------------------------------------------------------------------------------------------------------------------------------------------------------------------------------------------------------------------------------------------------------------------------------------------------------------------------------|-------------------------------------------------|--------------|------------------------------------------|---------------------------|
| <b>Data input</b>                                                                                                                                                                                                                                                                                                                                                                                                                                                                                                                                                                                                                                                                                           | <b>Reference or alternative case definition</b> | <b>Gamma</b> | <b>Beta coefficient, logit (95% UI)*</b> | <b>Adjustment factor†</b> |
| DSM or ICD case definition                                                                                                                                                                                                                                                                                                                                                                                                                                                                                                                                                                                                                                                                                  | Ref                                             | 0.34         | ---                                      | ---                       |
| Clinical records diagnosis criteria                                                                                                                                                                                                                                                                                                                                                                                                                                                                                                                                                                                                                                                                         | Alt                                             |              | -0.05 (-0.72 – 0.61)                     | 0.95                      |
| Algorithm diagnosis criteria (AGECAT)                                                                                                                                                                                                                                                                                                                                                                                                                                                                                                                                                                                                                                                                       | Alt                                             |              | 0.08 (-0.59 – 0.74)                      | 1.08                      |
| NIA-AA diagnosis criteria                                                                                                                                                                                                                                                                                                                                                                                                                                                                                                                                                                                                                                                                                   | Alt                                             |              | 0.51 (-0.16 – 1.17)                      | 1.67                      |
| 10/66 algorithm diagnosis criteria                                                                                                                                                                                                                                                                                                                                                                                                                                                                                                                                                                                                                                                                          | Alt                                             |              | 0.97 (0.30 – 1.64)                       | 2.64                      |
| GP records used for diagnosis                                                                                                                                                                                                                                                                                                                                                                                                                                                                                                                                                                                                                                                                               | Alt                                             |              | -1.21 (-1.88 – -0.54)                    | 0.30                      |
| UI, uncertainty interval.<br>*MR-BRT crosswalk adjustments can be interpreted as the factor the alternative case definition is adjusted by to reflect what it would have been had it been measured using the reference case definition. If the log/logit beta coefficient is negative, then the alternative is adjusted up to the reference. If the log/logit beta coefficient is positive, then the alternative is adjusted down to the reference.<br>†The adjustment factor column is the exponentiated beta coefficient. For log beta coefficients, this is the relative rate between the two case definitions. For logit beta coefficients, this is the relative odds between the two case definitions. |                                                 |              |                                          |                           |

Adjusted data were input into a DisMod-MR model to estimate dementia incidence and prevalence by year, age, sex and location. Smoking prevalence and education were included as predictive covariates in the model, with random effects on location.

Dementia due to other GBD conditions (stroke, traumatic brain injury, Parkinson’s disease, Down syndrome) were subtracted from total dementia to get final dementia cases. We do this to avoid double counting health loss (e.g., health loss from dementia due to stroke is captured under stroke health states). To determine the proportion of total

dementia attributed to stroke, Parkinson’s disease, traumatic brain injury, and Down syndrome, we conducted systematic reviews to identify studies on the relative risk of dementia due to these conditions and used these data as input into meta-analyses to determine relative risk of dementia due to each condition over age.<sup>8</sup> Results of each meta-analysis were used to calculate population attributable fractions (PAFs) with the following equation:

$$PAF = (exposure * (RR-1)) / (exposure * (RR-1) + 1)$$

PAFs were multiplied by total dementia prevalence to calculate cases of dementia due to each respective condition and subtracted from total dementia to get final dementia estimates. Final dementia prevalence was split into mild, moderate, and severe dementia based on studies that looked at the proportion of dementia in each respective severity using the Clinical Dementia Rating (CDR) scale, or other severity scales such as the Geriatric Mental State Examination (GMS), CAMDEX, Blessed test of information, memory, and concentration (BIMC), Karasawa’s, DISM-III-R, the Global Deterioration Scale (GDS), or Clinical Dementia Rating Sum-of-Boxes (CSR-SB). A total of 74 sources were identified for input to a meta-regression using MR-BRT to get severity by age.

To calculate YLDs, prevalence of dementia by severity was multiplied by its respective disability weight based on the following health state definitions (Table S9):

| <b>Table S9. Dementia severity definitions</b> |                                                                                                                                                                                                                                                                                                                          |
|------------------------------------------------|--------------------------------------------------------------------------------------------------------------------------------------------------------------------------------------------------------------------------------------------------------------------------------------------------------------------------|
| <b>Severity level</b>                          | <b>Lay description</b>                                                                                                                                                                                                                                                                                                   |
| Mild dementia                                  | The person has some trouble remembering recent events and finds it hard to concentrate and make decisions and plans. They may have slight to moderate difficulty engaging in community affairs, complicated hobbies, and intellectual interests.                                                                         |
| Moderate dementia                              | The person retains highly learned material, but has severe memory problems, is disoriented with respect to time and sometimes place. They are severely impaired in their ability to handle problems and make social judgments. They require assistance with daily activities, and only retain simple chores and hobbies. |
| Severe dementia                                | The person has complete memory loss, no longer recognises close family members, and requires help with all daily activities, including personal care.                                                                                                                                                                    |

### 3.3. Choosing the appropriate model and imprecision of the estimates

We used vetted tools such as DisMod-MR and CODEm for the majority of conditions-cross-validation approaches (eg, leaving out 20% of data, RMSE, etc) were used to assess standard model settings for DisMod. For nonfatal modelling using DisMod, we took the 1000 posterior draws after model convergence to get stable estimates with estimated uncertainty; 95% uncertainty interval (UI) is defined as the 0.025 and 0.975 quantiles of the draws. Choosing 1000 posterior samples is a common practice for balance and usually strikes a good trade-off between accuracy and efficiency, which is enough to capture the distribution without being computationally overwhelming. We have computed 1000 draws of the posterior for all elements that feed into GBD estimates. We did this to retain correlation. We have tested dropping this down to 500 draws for GBD 2021 and found this produced near identical results to those computed from 1000 draws.

For CODEm, candidate models were evaluated using out-of-sample predictive validity and cross-validation. Out-of-sample predictive validity measures how well the model predicts data that were not used in the model fitting, while cross-validation splits the data into training and testing sets and compares the model predictions with the testing data. Then, the final model(s) were selected based on the lowest RMSE and the lowest complexity penalty. The complexity penalty is a measure of how complex the model is, based on the number of parameters and random effects. The model with the lowest RMSE and the lowest complexity penalty is considered the best fit for the data.

In GBD analysis, the use of "uncertainty intervals" is a terminology choice. While Bayesian analysis often employs "credibility intervals," the concept is similar. Both intervals express the uncertainty around estimates. The term "uncertainty interval" may be preferred in this context for clarity across a broader audience, as it is not limited to the Bayesian framework. It is essentially addressing the same idea—acknowledging the range within which the true values might lie.

The GBD study accounts for the imprecision of estimates through several methods:

- Uncertainty intervals: GBD provides uncertainty intervals around its estimates, indicating the range within which the true values are likely to fall. This accounts for the imprecision in the data and modelling.
- Sensitivity analysis: GBD conducts sensitivity analyses to assess how changes in input parameters impact the estimates. This helps in understanding the robustness of the results and considering potential variations.
- Data quality metrics: GBD incorporates data quality metrics to assess the reliability of input data. Lower-quality data may lead to more imprecise estimates.

These approaches collectively address the inherent imprecision in the data and modelling processes, enhancing the transparency and reliability of the GBD estimates.

GBD estimates were assessed for stability through rigorous methods and ongoing validation. Stability was ensured by: a) data quality assurance thorough evaluation and validation of data sources to ensure accuracy; b) consistency checks with regular checks to maintain consistency across different sources and time periods; c) sensitivity analysis by examining how variations in input parameters affect the estimates, providing insights into stability; and d) peer review through inclusion of external experts for critical review ensures robustness and stability of the estimates. This continual process of validation and refinement contributed to the stability and reliability of GBD estimates.

In GBD analysis, for space time smoothing in CODEm, the temporal component relied on a tricubic function or exponential decay function. We run individual models per estimation year in DisMod. A common assumption regarding the time effect was that the relationships between risk factors, diseases, and demographic factors remain relatively stable over time. This assumption allowed for the extrapolation of trends and estimates into the future. However, this assumption might not always hold, and we did periodic reassessment and adjustments to account for any significant shifts or changes.

Further details are discussed in section 3 of Appendix 1 of the article: Global burden of 369 diseases and injuries in 204 countries and territories (on pages 48 to 56),<sup>1</sup> and Foreman et al.<sup>9</sup>

### 3.4. Heterogeneities

The inconsistency of global data for different conditions in different regions and nations has always been challenging. Seven issues create unique challenges: sparse or missing data for an outcome in a location; conflicting data (with non-overlapping confidence intervals) for the same outcome in the same place; heterogeneous case definitions, assays or instruments; non-sampling error; administrative data that exclude certain groups; limited predictive power of available covariates for an outcome; and the need to deal with anomalous studies or data points.<sup>10</sup> The wide uncertainty intervals for some of the findings reflect the heterogeneity of data sources in the North Africa and Middle East region and its countries and also incorporates uncertainty from modelling processes.

In the GBD study, handling heterogeneity of data in North Africa and Middle East for neurological conditions involved several key strategies:

- Data sources: GBD aggregates data from various sources, including national health surveys, vital registration systems, scientific literature, and other relevant databases. This helps capture the diversity of data available in the region.
- Adjustment for data quality: GBD assesses the quality of data sources and adjusts estimates accordingly using meta-regressions to test for and systematically adjust up or down the data collected using non-gold

standard case definitions (see the section describing MR-BRT “crosswalking” methodology). This is crucial for regions like North Africa and the Middle East where data quality may vary.

- Bayesian modelling: GBD often employs Bayesian statistical models to account for uncertainty and variability in data. This helps in providing more robust estimates, especially when dealing with heterogeneity. In particular, the DisMod-MR tool allows for multiple data points from different studies for the same demographics (eg, location, age, sex, year), and accounts for within-study variance to weight the relative importance of each data point (eg, larger sample size lends data more weight in the model).
- Subnational analysis: GBD recognises the diversity within regions and countries. Subnational analysis allows for a more granular understanding of the burden of disease, considering variations at a more localised level. This has been done for some of the countries in the region, such as Iran, and is in development for many others.
- Collaboration with experts: GBD involves collaboration with regional experts to ensure that local knowledge and nuances are considered in the estimation process.

These strategies collectively contribute to handling the heterogeneity of data in North Africa and the Middle East.

During the last three decades, GBD methodology evolved to build stronger tools to address these challenges. For instance, concerning data heterogeneity, mixed effects models were used for a linear random effects component and new analyses in place of classic approximations, such as log-linear models were used for nonlinear observation models.<sup>6,11</sup> GBD estimates are now internationally recognised as one of the most reliable health burden estimates and are officially used by the WHO for top-level decision-making.<sup>10,12</sup>

### 3.5. GBD global standard population

For GBD 2019, the non-weighted mean of age-specific proportional distributions from the population estimates for all national locations with a population greater than five million in 2019 was used to generate a standard population age structure.<sup>13</sup> Age-standardised rates in the GBD 2019 were calculated by using the GBD world standard population.<sup>14</sup>

In the GBD 2019 study, age-standardised rates were estimated using a method called direct standardisation:

- Age groups: The population is divided into specific age groups.
- Standard population: A standard population structure is chosen. This is a hypothetical population with known age distribution.
- Calculation: The age-specific rates in the studied population are applied to the standard population. This standardised the rates, making them comparable across different populations.
- Weighting: To account for variations in age distribution between the standard and studied populations, weights are applied to each age group.

This method allows for a meaningful comparison of rates across populations with different age structures.

### 3.6. Risk factor estimation

In GBD 2019, Meta-Regression— Bayesian, Regularised, Trimmed (MR-BRT) and Population Attributable Fractions (PAFs) were used to model relative risks.<sup>2</sup> In MR-BRT, a network random effects meta-regression was used. PAF is defined as “the proportion of disease cases that would not occur in a population if an individual risk factor were to be eliminated.”<sup>15</sup> The attributable burden is calculated as the PAF multiplied by a total burden that is dementia incidence to dementia prevalence ratio.<sup>2,9,15</sup> Details of the method of risk estimates are available in Appendix 1 of the article “Global burden of 87 risk factors in 204 countries and territories, 1990–2019.”<sup>2</sup>

Risk factors with a continuous exposure distribution with determined effect size include lead, high fasting plasma glucose, high LDL cholesterol, high systolic blood pressure, and high body-mass index, for which RRs were modelled with log-linear assumption using MR-BRT. For categorical or binary risk factors, such as all dietary risk

factors, low physical activity, and air pollution, non-linear functions using cubic splines were used to allow for monotonically increasing or decreasing.

The six analytical steps in the GBD 2019 method for estimating PAF included: (1) nineteen risk–outcome pairs meeting criteria for convincing or probable evidence on the basis of research studies were included; (2) based on published systematic reviews, GBD reviews, and meta-regressions, relative risks were estimated as a function of exposure; (3) based on all available data sources levels of exposure in each age/sex/location/year included in the study were estimated using spatiotemporal Gaussian process regression, DisMod-MR 2.1, a Bayesian meta-regression method, or alternative methods; (4) the level of exposure associated with minimum risk, called the theoretical minimum risk exposure level, was determined from published trials or cohort studies; (5) attributable DALYs were computed by multiplying PAFs by the relevant outcome quantity for each age, sex, location, and year. (6) PAFs and attributable burden for combinations of risk factors were estimated considering the mediation of different risk factors through other risk factors.<sup>3</sup> The PAF for each condition is calculated with the following equation, where exposure is defined as the prevalence of the condition.<sup>2</sup> The mediation analysis is reported by individual-level data from prospective cohort studies on the joint effects of combinations of risk factors.”<sup>3</sup>

$$\text{Population Attributable Fractions (PAF)} = \text{exposure} * (RR - 1) / ([\text{exposure} * (RR - 1)] + 1)$$

### 3.6.1. Determine relative risks

The relative risk (RR) by level of exposure or by cause for mortality or morbidity can be found in published and unpublished primary studies or in secondary studies that summarise RRs. We collated information from RCTs, cohort, pooled cohort, and case-control studies, and used these data to determine the RR for the risk–outcome pairs included in GBD 2019. For most risks, data from pooled cohorts or meta-analyses of cohorts were used; in the case of the risk of cataracts from household air pollution (HAP), cohort data were not available, and instead we used case-control data. We estimated RRs of mortality and morbidity for all risk factors for which we determined attributable burden by using RR and exposure. We incorporated RRs from studies that controlled for confounding but not for factors along the causal pathway between exposure and outcome. For risk–outcome pairs with evidence available for only one element of mortality or morbidity, we generally assumed that the estimated RRs applied equally to both. Given evidence of statistically different RRs for mortality and morbidity, we incorporated different RRs for each. We did not find that RRs were consistently higher or lower for mortality compared with morbidity. Details and citation information for the data sources used for RRs are provided in searchable form through a web-tool (<http://ghdx.healthdata.org/>). Available data sources for determining RRs varied across risks.

For the following risks estimated from a continuous exposure distribution in which the effect size was reported by categories in pooled or meta-analysis studies, we converted those categories to RR per unit increase in exposure and assumed a linear increase in the log of the RR and exposure: ambient ozone pollution, lead, high fasting plasma glucose, high LDL cholesterol, high systolic blood pressure, and high body-mass index. Many meta-analyses convert RRs to per unit increase for convenience, particularly when studies choose different categories that could not otherwise be compared. If samples in the primary studies at high levels of exposure were sufficient to inform the shape of the tail of the distribution, we applied a cap to the maximum RR by using the midpoint of the last category for which an RR was reported.

In GBD 2019, for a selected set of continuous risk factors, we modelled RRs using meta-regression— Bayesian, regularised, trimmed (MR-BRT), relaxing the log-linear assumption to allow for monotonically increasing or decreasing but non-linear functions using cubic splines. The MR-BRT program is a set of wrappers customised for global health problems that use the open source mixed effects package (<https://github.com/zhengp0/limetr>). Risk factors for which we undertook this re-analysis include: all dietary risk factors, low physical activity, kidney dysfunction, and air pollution. Because knot placement can affect the shape of the risk function when modelling with a cubic spline, we generated a wide range of knot placements and created an ensemble across these different knot placements. We also included in the final estimation 10% trimming of the data to avoid the results being



sensitive to outliers.

For GBD 2019, we conducted systematic literature reviews for 18 risks. For other risk factors, only a small fraction of the existing data appears in the published literature, and other sources predominate, such as survey data and satellite data. Data were systematically screened from household surveys archived in the GHDx (<http://ghdx.healthdata.org>), including Demographic and Health Surveys, Multiple Indicator Cluster Surveys, Living Standards Measurement Surveys, and Reproductive Health Surveys. Other national health surveys were identified based on survey series that had yielded usable data for past rounds of GBD, sources suggested to us by in-country collaborators, and surveys identified in major multinational survey data catalogues, such as the International Household Survey Network and the WHO Central Data Catalog, as well as through country Ministry of Health and Central Statistical Office websites. Citations for all data sources used for risk factor estimation in GBD 2019 are provided in searchable form through a web-tool (<http://ghdx.healthdata.org>).

Information on systematic reviews were managed by using Research Electronic Data Capture (REDCap) electronic data capture tools hosted at the University of Washington.<sup>16</sup> REDCap is a secure, web-based application designed to support data capture for research studies that provides 1) an intuitive interface for validated data entry; 2) audit trails for tracking data manipulation and export procedures; 3) automated export procedures for seamless data downloads to common statistical packages; and 4) procedures for importing data from external sources.

### **3.6.2 Search terms and data preparation**

Search terms for updates of systematic reviews for GBD 2019 are shown by risk factor in appendix section 4 Supplementary appendix 1 of Supplement to: “GBD 2019 Risk Factors Collaborators. Global burden of 87 risk factors in 204 countries and territories, 1990-2019: a systematic analysis for the Global Burden of Disease Study 2019”.<sup>2</sup>

Survey data constitutes a substantial part of the underlying data used in the estimation process. During extraction, we concentrated on demographic variables (such as location, gender, age), survey design variables (such as sampling strategy and sampling weights), and the variables used to define the population estimate (such a prevalence or a proportion) and a measure of uncertainty (standard error, confidence interval or sample size and number of cases).

Several adjustments were applied to extracted exposure sources to make the data more consistent and suitable for modelling. In GBD 2019, we implemented adjustments of risk exposure data to deal with alternative case definitions or study methods prior to entering data into our main analytical tools of DisMod-MR 2.1 and ST-GPR. This decision also included the adjustment of data presented for both sexes to a male and female equivalent. The starting point was to explicitly state the reference case definition and study method and identify alternative definitions and study characteristics that fall within our inclusion criteria. We compiled data from both within-study comparisons (ie, data that used alternative and reference definitions in the same population) and between-study comparisons (ie, data that used an alternative definition in one population and a reference definition in another population that overlap in location, time, age, and sex) of different case definitions. For between-study comparisons, we allowed a maximum calendar year difference between studies of five years. Where validation studies (ie, those carried out at the introduction of a new set of diagnostic criteria comparing to previous criteria) were available, we extracted data on the comparison of alternative to reference. For quantities of interest with multiple alternative definitions/methods we also look for pairs comparing two alternatives. In a network analysis, if A is the reference and B and C are two alternatives, a comparison of A vs B and B vs C provides an indirect comparison of the alternative C against the reference A.

We pooled either the logit difference between alternative and reference or the natural log of the ratio of alternative to reference. From simulations we found that the two methods provide almost identical results for quantities that after adjustment do not exceed a value of 0.5 (eg, prevalence or proportion). The logit difference method much better dealt with higher values and avoided prevalence or proportions to exceed one. If the values of either the reference or

alternative were zero, we aggregated values across age groups until both values had non-zero observations. We used the delta method to compute the standard error of the reference and alternative measures in logit space. The standard error of the logit difference was computed as the square root of the sum of the variances of each data point in a pair.

### 3.6.3. Data analysis

We used a network random effects meta-regression in MR-BRT. In a network analysis, if A is the reference and B and C are two alternatives, a comparison of A vs B and B vs C provides an indirect comparison of the alternative C against the reference A. To implement the network, we included dummy variables with a particular structure. This was implemented as follows, where A is the reference definition/method:

- Create  $k$  dummy variables where  $k$  are all definitions/methods other than A (eg,  $k = B, C$ )
- Code dummy  $k$  as
  - 1 if the first term of the logit difference is  $k$ ;
  - -1 if  $k$  is second term of the logit difference;
  - 0 otherwise

For example:

| Study | Comparison        | DummyB | DummyC |
|-------|-------------------|--------|--------|
| 1     | logit(B)-logit(A) | 1      | 0      |
| 2     | logit(B)-logit(A) | 1      | 0      |
| 3     | logit(C)-logit(A) | 0      | 1      |
| 4     | logit(C)-logit(A) | 0      | 1      |
| 5     | logit(C)-logit(B) | -1     | 1      |
| 6     | logit(C)-logit(B) | -1     | 1      |

The coding structure outlined above in step 1 assumes that all case definitions are mutually exclusive. In some cases, however, individual case definitions are a function of different components or dimensions. For example, case definitions may vary by the type of symptoms that a respondent experiences as well as the recall period over which those symptoms are experienced. In the presence of sparse data, it may be difficult to find both direct and indirect comparisons of all individual case definitions. In this case, an alternative approach is to assume different dimensions of case definitions have a multiplicative effect. In other words, the effect of recall period has the same relative effect across different categories of symptoms reported by respondents. To implement this coding scheme:

- Create  $k$  dummy variable columns for each case definition dimension
- For each dummy variable  $k$ :
  - Add 1 if  $k$  is a component of the first term in the logit difference
  - Subtract 1 if  $k$  is a component of the second term in the logit difference

In MR-BRT, we ran random effects meta-regression of the logit difference (or log ratio) with all the  $k$  dummy variables as covariates, omitting the intercept in the meta-regression. We used a study\_id variable for be the unique combination of the NIDs of the reference and alternative studies (or alternative1 to alternative2). The coefficients on the  $k$  dummy variables represent the pooled logit difference of the  $k$  alternative definition to the reference taking into account evidence from both direct and indirect comparisons. In the example above, the coefficient on DummyA is the pooled logit difference of B minus A; the coefficient on DummyB is the pooled logit difference of C minus A. The standard error of the pooled logit difference incorporating the between study variance was calculated as:

Where:  $se(\text{logit}(\text{difference}_k))$  = standard error of the pooled logit difference of

alternative  $k$  to the reference

$var_k$  = variance of the coefficient on dummy variable  $k$

$\gamma^2$  = between-study variance

$$se(\text{logit}(\text{difference}_k)) = \sqrt{var_k + \gamma^2}$$

If both between and within study pairs were available, we examine whether there was a systematic difference between these. If there was a significant difference, we made judgement call as to whether within-study or between study data comparisons were most appropriate. In general, this was the within-study data, however, there were important measurement or conceptual reasons for choosing between-study data. For example, for crosswalks between self-reported height and weight compared to measured height and weight, between-study comparisons may be preferable if respondents knew they would be measured and, therefore, were less likely to misreport their height and weight.

We also examined whether there were systematic differences in the adjustments by key demographics (age, sex, geographic location, year) and other potential factors that may lead to variation in crosswalks. This could only be done at present in a direct comparison model and not in a network. We did this when there was a strong rationale, eg, biological plausibility, for variation by such characteristics. After obtaining the pooled logit difference or log ratio estimates, we predicted adjustments based on the statistical model, including uncertainty in the adjustment and sampling error of each data point. For non-significant logit differences or log ratios we still applied the adjustments if there was a conceptual reason to believe that the alternative definition is biased. This expands the variance of these alternative definition data points.

#### **3.6.4. Estimates exposure**

We used systematic literature reviews to identify risk factor exposure studies published or identified since GBD 2017 and combined these with existing data from household and health examination surveys and census, morbidity, or satellite imagery and ground sensor data (used for estimation of particulate matter  $<2.5 \mu\text{m}$  in diameter [PM<sub>2.5</sub>]). Certain risks, such as poor diet and excessive alcohol consumption, also incorporated administrative record systems. Data sources used in estimating risk factor exposure can be accessed through the data source tool at <http://ghdx.healthdata.org/>.

Once data were collected and compiled, the analytical flowchart describes the adjustments applied, where necessary, to correct for bias. Examples of these adjustments include use of urban studies for lead; crosswalks between different measurements, methods, and definitions, such as for self-report of obesity and glycated haemoglobin (HbA<sub>1c</sub>) for diabetes; and age-sex splitting of data, such as for fasting plasma glucose (FPG) level, cholesterol level, and systolic blood pressure that may be reported from broad age-groups.

For the GBD, we developed two modelling approaches, a Bayesian meta-regression model (DisMod-MR 2.1) and a spatiotemporal Gaussian process regression model (ST-GPR), to pool data from different sources, control and adjust for bias in data, and incorporate other types of information such as country-level covariates. DisMod-MR 2.1 and ST-GPR are mixed effect models that borrow information across age, time, and locations to synthesise multiple data sources into unified estimates of levels and trends. A detailed description of the likelihood used for estimation and a full description of improvements made for DisMod-MR 2.1 were detailed by Vos and colleagues,<sup>1</sup> The ST-GPR model has three main hyper-parameters that control for smoothing across time, age, and location. Values for these hyper-parameters were selected on the basis of cross-validation. Cross-validation tests were conducted for different combinations of the hyper-parameters for three types of models: one data-sparse model, one data-moderate model, and one data-dense model. In each test, 20% of the data were held out, and the performance of each combination of hyper-parameters was evaluated on the held-out data. For each hyper-parameter combination, 10 cross-validation tests were conducted. The performance of each model in predicting the withheld 20% of the data was evaluated by using a combined measure based on root mean square error (RMSE) and uncertainty interval (UI) coverage. A detailed description of the ST-GPR process regression can be found below.

The main difference between these methods is their power to include unstructured types of data by sex and age group and their degree of flexibility. DisMod-MR 2.1 is the preferred tool in these cases because of its ability to integrate over age and adjust for different exposure definitions in the data; however, the use of Bayesian Markov Chain Monte Carlo (MCMC) simulations with large volumes of data renders the analysis computationally intensive and reduces the number of iterations that are possible. If standard age-group data are available – as is generally the

case for metabolic risks – using ST-GPR becomes the preferred approach.

In some cases, we adapted our methods of modelling exposure to risks where necessary to account for complexities in the risk-outcome relationship or the need for particular handling of data, for example, dietary risks and ambient air pollution (see appendix section 4 to: “GBD 2019 Risk Factors Collaborators. Global burden of 87 risk factors in 204 countries and territories, 1990-2019: a systematic analysis for the Global Burden of Disease Study 2019”<sup>2</sup> for more detail). A complete list of risks is reported in table S5, and additional details for adjustments or adaptations to particular risk models are provided in appendix section 4 (“GBD 2019 Risk Factors Collaborators. Global burden of 87 risk factors in 204 countries and territories, 1990-2019: a systematic analysis for the Global Burden of Disease Study 2019”).<sup>2</sup>

### ***Theoretical minimum-risk exposure level (TMREL)***

In this and all previous GBD studies, the counterfactual level of risk exposure used is the risk exposure that is both theoretically possible and minimizes risk in the exposed population that consequently captures the maximum population-attributable burden.<sup>17</sup> For each risk evaluated in GBD 2019, Step 4 of the analytical process describes the use of the best available epidemiological evidence from published and unpublished RRs by level of exposure and the lowest observed level of exposure from cohorts, used to select a single level of risk exposure that minimises risk from all causes of deaths combined to establish the TMREL. In principle, the TMREL for a given risk may vary by age, sex, and location if supported by clear evidence. Based on the available evidence, the TMREL itself can be uncertain, which is reflected in the 95% UIs. In GBD 2019, we updated the process of estimating TMREL for dietary risks. We set the TMREL to zero for all harmful dietary risk factors with monotonically increasing risk functions (eg, processed meat intake); this excludes sodium. For protective risks with monotonically declining risk functions with exposure (eg, fruit intake), we first determined the 85<sup>th</sup> percentile of exposure in the cohorts or trials used in the meta-regression of each outcome that was associated with the risk. Then, we determined the TMREL by weighting each risk-outcome pair by the relative global magnitude of each outcome.

### ***Estimate population-attributable fractions***

Risks are categorised on the basis of how exposure was measured: dichotomous, polytomous, and continuous. High low-density lipoprotein (LDL) cholesterol level is an example of a risk measured on a continuous scale. The PAF, which represents the proportion of risk that would be reduced in a given year if the exposure to a risk factor in the past were reduced to an ideal exposure scenario, is defined for a continuous risk factor as:<sup>18</sup>

Where  $PAF_{joasgt}$  is the PAF for cause  $o$  due to risk factor  $j$  for age group  $a$ , sex  $s$ , location  $g$ , and year  $t$ .

$RR_{joasg}(x)$  is the RR as a function of exposure level  $x$  for risk factor  $j$  for cause  $o$ , age group  $a$ , sex  $s$ , and location  $g$  with the lowest level of observed exposure as  $l$  and the highest as  $u$ ;  $P_{jasgt}(x)$  is the distribution of exposure at  $x$  for age group  $a$ , sex  $s$ , location  $g$ , and year  $t$ ; and  $TMREL_{jas}$  is the TMREL for risk factor  $j$ , age group  $a$ , and sex  $s$ .

$$PAF_{joasgt} = \frac{\int_{x=l}^u RR_{joasg}(x)P_{jasgt}(x)dx - RR_{joasg}(TMREL_{jas})}{\int_{x=l}^u RR_{joasg}(x)P_{jasgt}(x)dx}$$

The  $PAF_{joasgt}$  for dichotomous and polytomous risk factors for every country is defined as:

where  $PAF_{joasgt}$  is the PAF for cause  $o$  due to risk factor  $j$  for age group  $a$ , sex  $s$ , location  $g$ , and year  $t$ .

$RR_{joasg}(x)$  is the RR as a function of exposure level  $x$  for risk factor  $j$  for cause  $o$ , age group  $a$ , sex  $s$ , and location  $g$  on a plausible range of exposure levels from  $l$  to  $u$ ;  $P_{jasgt}(x)$  is the proportion of the population in risk group (prevalence) for age group  $a$ , sex  $s$ , location  $g$ , and year  $t$ ; and  $TMREL_{jas}$  is the TMREL for risk factor  $j$ , age group  $a$ , and sex  $s$ .

$$PAF_{joasgt} = \frac{\sum_{x=1}^u RR_{joast}(x)P_{jasgt}(x) - RR_{joasg}(TMRE_{jas})}{\sum_{x=1}^u RR_{joas}(x)P_{jasgt}(x)}$$

**Estimate summary exposure values**

We first calculate risk,  $r$ , and cause,  $c$ , for specific SEVs by using the following equation, for each most-detailed age, sex, location, year, and outcome.  $PAF$  is the YLL (expect for occupational noise, bullying victimization, and occupational ergonomic factors, which are YLD only and thus use the YLD)  $PAF$ .  $RR_{max}$  for categorical risks is the RR at the

$$SEV_{rc} = \frac{PAF_{rc}}{1 - PAF_{rc}} \frac{1}{RR_{max} - 1}$$

highest category of exposure. For continuous risks, this is otherwise, and for custom modelled risks like ambient particulate matter pollution, HAP from solid fuels, alcohol, smoking, bullying, and activity, the modeller provides draws of  $RR_{max}$ .

$$RR_{max} = RR \frac{TMREL - 1^{st} exposure}{RR_{scalar}} \text{ if protective, or}$$

$$= RR \frac{99^{th} exposure - TMREL}{RR_{scalar}}$$

Generally, RRs do not vary across time and space. However, exceptions exist, such as risks from second-hand smoke (SHS) or

HAP for which the RR is based on the integrated exposure response (IER) curve. In these cases, the RR is averaged across location and year to ensure no time or space variation. If the  $PAF$  is negative, which signifies a protective effect for that outcome, the  $PAF$  is set to 0 and the SEV is then also 0 because the SEV is univariate and constrained to be a value

$$SEV_r = \frac{1}{N(c)} \sum_c SEV_{rc}$$

between 0 and 1. Once we obtained a set of risk-cause specific SEVs at the most-detailed risk, cause, age, sex, and location for all years, we averaged across causes to produce the final risk specific  $SEV_r$ , where  $N(c)$  is the total number of outcomes for a risk.

**Mediation**

The portion of the burden of disease that is attributable to various combinations of risk factors or to all risk factors combined has been a topic of broad interest.<sup>17</sup> In GBD 2010, we only aggregated the burden of risk factors for some clusters of risks, including access to improved water and sanitation, child and maternal malnutrition, tobacco smoking, alcohol use, dietary risk factors, occupational risk factors, and sexual abuse and violence. We did not aggregate air pollution and metabolic risk factors. For GBD 2013 onwards, we aggregated all risk factors into three large categories—behavioural, environmental, and occupational, and metabolic risks—and aggregated all GBD risk factors into a single attributable fraction for each disease and eventually for all causes of burden.

Aggregating risk factors at different levels shares three essential challenges:

1. Risk factor coexistence or aggregation: for example, metabolic risk factors often occur together, or high-risk behaviours such as drug abuse and unsafe sex are related.
2. Mediation: a risk factor may affect another risk factor that lies in the physiological pathway to a disease outcome. It can be inside a cluster of risk factors, such as the effect of obesity through an increase in FPG level and later cardiovascular disease (CVD) outcomes, or between clusters of risk factors, such as the effect of fibre on cholesterol.
3. The formula used to calculate the aggregated  $PAF$ .

The aggregation method is conceptually applicable to other aggregations such as socioeconomic factors, education, homelessness, and refugee status that are being considered for inclusion in future GBD iterations. In the next section, we explain our approach to dealing with these challenges.

There are three patterns of associations between risk factors to consider (figure below). The first concerns confounding; risk B affects risk A and outcome C (Pattern 1 in *Patterns of associations between risk factors*). In these cases, the RR for A should be adjusted for B; for example, the fruit RR is adjusted for smoking. If part of the effect of A is through B, a mediator, we do not adjust the effect of A for B. For example, we do not adjust the RR of body-mass index (BMI) for cholesterol because cholesterol lies in the biological pathway between BMI and cardiovascular outcomes (Pattern 2 in *Patterns of associations between risk factors*). The third pattern occurs when risks A and B are proxies of a third variable Z and aggregation aims to estimate the total effect of a latent variable Z on C. An example is child growth failure, which is measured by stunting, wasting, and underweight as

proxies.

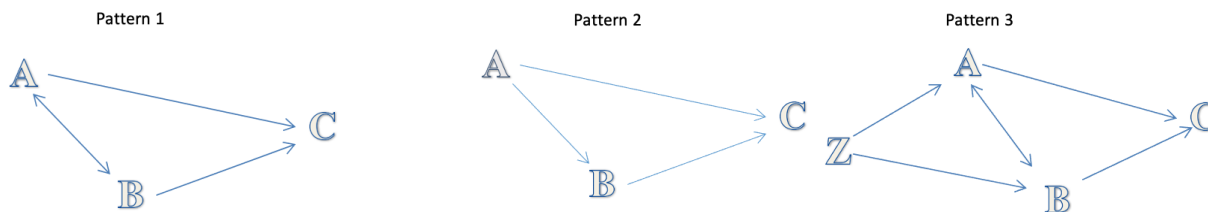

**Calculating the burden of multiple risk factors**

Validation studies have reported congruency between the true risk associated with multiple risk factors affecting the same outcome and a multiplicative aggregation of the PAFs of the individual risk factors (formula below),<sup>18</sup> where PAF is the population attributable fraction and *i* is each individual risk factor. The same validation studies also found that the overestimation from ignoring the covariance between risk factors is small. This small overestimation was important to note because few data sources exist from which we can draw information on covariance. We endeavoured to evaluate RRs that were controlled for confounders. However, because we had to rely on the literature for many RRs, we did not always have full control over the choice of confounders controlled for in each study.

$$PAF_{1..i} = 1 - \prod_{i=1}^n (1 - PAF_i)$$

**Adjusting for mediation**

When aggregating the effects of multiple risk factors, we included an MF if a part of the effect of one risk factor was included in the effect estimated for in the mediator. First, we prepared a list of possible mediations, and especially between behavioural risks and metabolic risk factors with cardiometabolic outcomes. We did not assume any mediation effect between risk factors for cancers. Danaei and colleagues assumed that part of the effect of BMI on ischaemic heart disease (IHD) is through high systolic blood pressure (SBP), cholesterol level, and FPG.<sup>19</sup> The proportion of the BMI effect that can be explained by other metabolic risk factors is the amount of mediation. The difference between the crude RR of BMI on IHD with the RR adjusted for SBP, FPG, and cholesterol level reflects the amount of BMI effect on IHD that is mediated and already included in SBP, FPG, and cholesterol level:

So, to aggregate the PAF of multiple risk factors, we first calculated the part of the excess risk (RR-1) of every risk factor that is not mediated, re-compute the PAF so that it only includes the non-mediated risk then aggregated PAFs by assuming they are independent. Therefore, if MF is the mediation factor of R2 through R1, the adjusted RR for R2 including only the non- mediated component of risk is The PAF accounting for mediation is then computed using the adjusted RR and the joint PAF computed. For every paired risk factor and outcome, the matrix of possible mediations was calculated and used.

$$MF = \frac{RR_{crude} - RR_{adjusted}}{RR_{crude} - 1}$$

$$RR_{1,2} = MF_{2/1}(RR_2 - 1) + 1$$

**Calculating mediation factor**

The best example is the mediation of BMI through SBP, FPG, and cholesterol level reported by Danaei et al.<sup>19</sup> In their meta-analysis, they report the adjusted and unadjusted RR of BMI on IHD and stroke based on combined data from individual cohorts. They calculated the MF by using the following equation, and we used it directly as the MF in risk factor aggregation. Using individual-level data from cohort studies, we estimated the MF for other metabolic risk factors and some dietary risks. For many other risk factors, no data are available to enable the use of the first method. Instead, we searched studies to estimate the effect of the risk factor on the mediator and, finally, the expected increase in IHD risk. We pooled available studies to calculate the unit increase in the mediator per unit increase in the risk factor to calculate the size of the IHD RR.

$$MF = \frac{RR_{crude} - RR_{adjusted}}{RR_{crude} - 1}$$



**Uncertainty of aggregated and mediated PAFs**

We generated 1000 draws of the posterior distribution of the MF calculated by different methods to use beside draws of other inputs to the PAF aggregation.

**Important assumptions in aggregating risk factors and including mediation**

- 1 – The MFs or PAF adjustments are similar across countries, age, sex, and years. Although the size of mediation is probably different in different populations, little data is available to inform the covariance between different risk factors or the MF amount by age and country. For example, in some countries, the size of the mediated BMI-IHD PAF exerted through cholesterol level, as calculated by the MF, was even bigger than the total burden of cholesterol level. This finding indicated that less of the effect of BMI is mediated through cholesterol level and MFs are not similar across countries.
- 2 – For many risk-mediator-outcome pairs, no data are available, so we assumed the mediation is zero.
- 3 – Because the covariance between undernutrition indicators differs by location (and across time, but results were not reported), and an interaction exists between these indicators, the total burden might be underestimated.
- 4 – We assumed no significant covariance between PAFs, which might not be true between some risk factors, such as metabolic risk factors. Although this overestimation can be controlled by using adjusted RRs, using crude RRs for BMI and other metabolic risk factors may cause significant overestimation of the aggregated metabolic risks burden.

**Estimate attributable burden**

Four key components are included in the estimation of the burden attributable to a given risk factor: the metric of burden being assessed (the number of deaths, YLLs, YLDs, or DALYs [the sum of YLLs and YLDs]); the exposure levels for a risk factor; the RR of a given outcome due to exposure; and the counterfactual level of risk factor exposure. Estimates of attributable burden as DALYs for risk-outcome pairs were generated by using the following model:

$$AB_{jasgt} = \sum_{o=1}^w DALY_{joasgt} PAF_{joasgt}$$

where  $AB_{jasgt}$  is the attributable burden for risk factor  $j$  for age group  $a$ , sex  $s$ , location  $g$ , and year  $t$ ;

$DALY_{joasgt}$  is total DALYs for cause  $o$  (of  $w$  relevant outcomes for risk factor  $j$ ) for age group  $a$ , sex  $s$ , location  $g$ , and year  $t$ ; and  $PAF_{joasgt}$  is the PAF for cause  $o$  due to risk factor  $j$  for age group  $a$ , sex  $s$ , location  $g$ , and year  $t$ . The proportions of deaths, YLLs, or YLDs attributable to a given risk factor or risk factor cluster were analogously computed by sequentially substituting each metric in place of DALYs in the equation provided.

**Decomposition analysis of deaths and DALYs**

We conducted a decomposition analysis of changes in DALYs from 2010 to 2019, decomposing changes in all-age cause-specific DALYs attributable to all risk factors and individual risk factors due to changes in population growth, population age structure, exposure to the given risk for a disease, and risk-deleted death and DALY rates. In this case, risk-deleted rates are the rates obtained after removing the effect of a risk factor or combination of risk factors — in other words, observed DALY rates multiplied by one minus the PAF for the risk or set of risks. Our decomposition analyses draw from methods developed by Das Gupta<sup>20</sup> to provide a computationally tractable solution for isolating drivers of burden changes whereby all combinations of possible pathways are averaged across factors. Attributable burden was determined, following the methods of Das Gupta,<sup>20</sup> as a product of three factors such that: where  $T_{asgt}$  represents the attributable burden at year  $t$ ;  $A_{sgt}$  is the age-specific population size for a given age group  $a$ , sex  $s$ , and location  $g$  at year  $t$ ;  $B_{asgt}$  is the underlying rate of the outcome unrelated to the risk factor or observed rate, multiplied by  $1 - PAF$  for a given age group  $a$ , sex  $s$ , and location  $g$  at year  $t$ ; and  $C_{asgt}$  is the ratio of the attributable burden to the underlying rate, which reflects the risk exposure effect for a given age group  $a$ , sex  $s$ , and location  $g$  at

$$T_{asgt} = (A_{asgt} B_{asgt} C_{asgt})$$

$$E_A = (A_{19} - A_{10}) \left( \frac{B_{10}C_{10} + B_{19}C_{19}}{3} + \frac{B_{10}C_{19} + B_{19}C_{10}}{6} \right)$$

year  $t$  defined as  $PAF/(1 - PAF)$  when decomposing attributable burden to a risk. Risk exposure effects for individual risk factors are scaled such that they sum to the all-risk exposure effect by location, age, sex, and cause accounting for mediation. This process allows for aggregation of risks; the exposure for all risks for a disease can be split into exposure to metabolic, behavioural, and environmental risks. The contribution of each factor to total change in attributable burden was determined by changing the level of one factor from time  $t_0$  to  $t_1$  – here 2010 to 2019 – with all other factors held constant. Thus, the effect of any of the three factors, for example  $A_{asgt}$  on the change of the attributable burden between 2010 ( $A_{10}$ ) and 2019 ( $A_{17}$ ) is calculated as: where  $E_A$  is the proportion of change due to factor  $A$ , and the subscripts for each factor in the equation denote the year for each estimate. Because the effect depends on the order of entry of the factor, we calculated the average of all combinations of the three factors. The proportion of change due to factor  $A_{sgt}$ , the age-specific population size for a given age group  $a$ , sex  $s$ , and location  $g$  at year  $t$ , is then further split, setting change in population growth equal to the percentage change in the all-age population from time  $t_0$  to  $t_1$  and change in population age structure to the residual, giving four factors.



### 4. Detailed methodology for each condition

This section is a verbatim from GBD 2019 Capstones with detailed methodology for each condition.<sup>1,2,3</sup>

#### 4.1. Alzheimer’s disease and other dementias (fatal modelling)

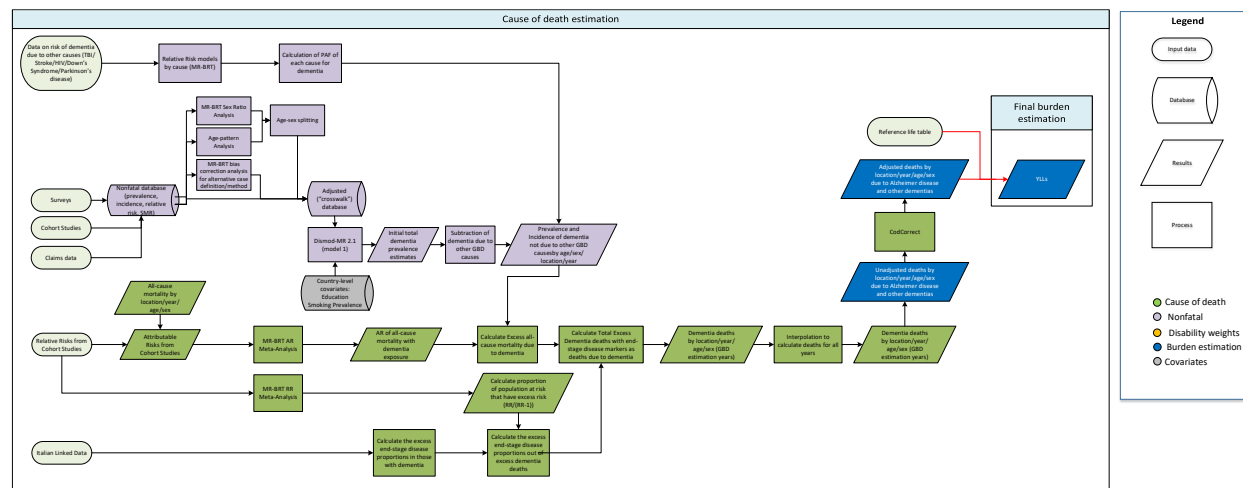

#### Input data

In GBD 2019, fatal modelling was redesigned to remove reliance on vital registration data (described in more detail in the “Modelling strategy” section). Instead, two new source types were extracted:

- (1) Literature on the relative risk of all-cause mortality given the exposure of dementia. Relative risk sources were identified through a systematic review using search terms<sup>2</sup> in PubMed. This yielded 4470 total hits, of which 34 studies were marked for extraction. Overall, the data were heterogeneous and varied in the exposure category measured (all dementia, Alzheimer’s disease, cognitive impairment) and in the different factors controlled for in analyses.
- (2) Linked vital registration and hospitalisation data. We used mortality records linked to inpatient records, covering all deaths from 2003 to 2017 in the Emilia-Romagna region of Italy.

**Table: Results of systematic review on all-cause excess mortality with dementia**

|                                          |           |
|------------------------------------------|-----------|
| <i>N</i>                                 | 60        |
| <i>Region name (%)</i>                   |           |
| East Asia                                | 4 (6.7)   |
| Eastern sub-Saharan Africa               | 2 (3.3)   |
| High-income Asia Pacific                 | 4 (6.7)   |
| High-income North America                | 22 (36.7) |
| North Africa and Middle East             | 1 (1.7)   |
| Tropical Latin America                   | 1 (1.7)   |
| Western Europe                           | 26 (43.3) |
| <i>Exposure (%)</i>                      |           |
| Alzheimer’s disease                      | 11 (18.3) |
| cognitive impairment                     | 10 (16.7) |
| other dementia                           | 35 (58.3) |
| vascular dementia                        | 4 (6.7)   |
| <i>Conducted in clinical setting (%)</i> |           |
| Clinical setting                         | 10 (16.7) |
| Population representative                | 50 (83.3) |
| <i>Controlled for education (%)</i>      |           |
| Controlled                               | 32 (53.3) |
| No control                               | 28 (46.7) |

**Table: Results of systematic review on all-cause excess mortality with dementia**

|                                                     |            |           |
|-----------------------------------------------------|------------|-----------|
| <i>Controlled for basic CVD info (%)</i>            | Controlled | 33 (55.0) |
|                                                     | No control | 27 (45.0) |
| <i>Extensive CVD control (%)</i>                    | Controlled | 15 (25.0) |
|                                                     | No control | 45 (75.0) |
| <i>Controlled for smoking and alcohol (%)</i>       | Controlled | 11 (18.3) |
|                                                     | No control | 49 (81.7) |
| <i>Controlled for factors in causal pathway (%)</i> | Controlled | 13 (21.7) |
|                                                     | No control | 47 (78.3) |

**Modelling strategy****Overview**

Dementia mortality rates have increased more than five-fold since 1980 in high-quality vital registration systems such as in the USA and Scandinavia. We have not seen an equivalent increase in prevalence and incidence data sources. If at all, there has been a modest decline in incidence and prevalence of dementia in studies in the UK and the USA.<sup>21,22</sup> Also, the greater than 20-fold variation in mortality rates of dementia between countries is much greater than the four-fold difference in prevalence and incidence between countries. As it is unlikely that case fatality from dementia has dramatically increased over the time period and that it would differ by a very large margin between countries, the hypothesis is that certifying and coding practices have changed over time and at a different pace between countries. To avoid spurious large trends over time in the fatal component of the burden of dementia, we decided for GBD 2013 to make dementia mortality rates consistent with the most recent rates relative to prevalence of countries that are most likely to certify or code dementia as an underlying cause of death. This approach was applied again for GBD 2017 with some modifications. For GBD 2019, the fatal modelling process was redesigned to avoid the need for using estimates only from the highest dementia mortality locations. This was accomplished with an attributable risk model based on a systematic review of cohort studies and relative risk data, and end-stage disease proportions from linked hospital and death records. The modelling process is described below.

**Modelling steps***Relative risk data*

First, using relative risk data extracted from studies identified by systematic review, we calculated attributable risk and the GBD estimate of all-cause mortality rate for a given study location and time, using the following formula:

$$\text{Attributable Risk} = (\text{Relative Risk} - 1) * \text{All-Cause Mortality}$$

We then conducted a meta-analysis on the attributable risk data, using covariates for age, sex, exposure category (all dementia, Alzheimer's disease, cognitive impairment), whether the study was conducted in a clinical sample, and categories indicating different types of variables that were controlled for in the component studies (educational attainment, cardiovascular disease comorbidities, smoking and alcohol consumption, and daily activities or residence in a nursing home). Relative risks were estimated using a second Bayesian bias-reduction meta-regression model and the same studies identified through systematic review. Regression results for relative risk and attributable risk analyses are displayed below.

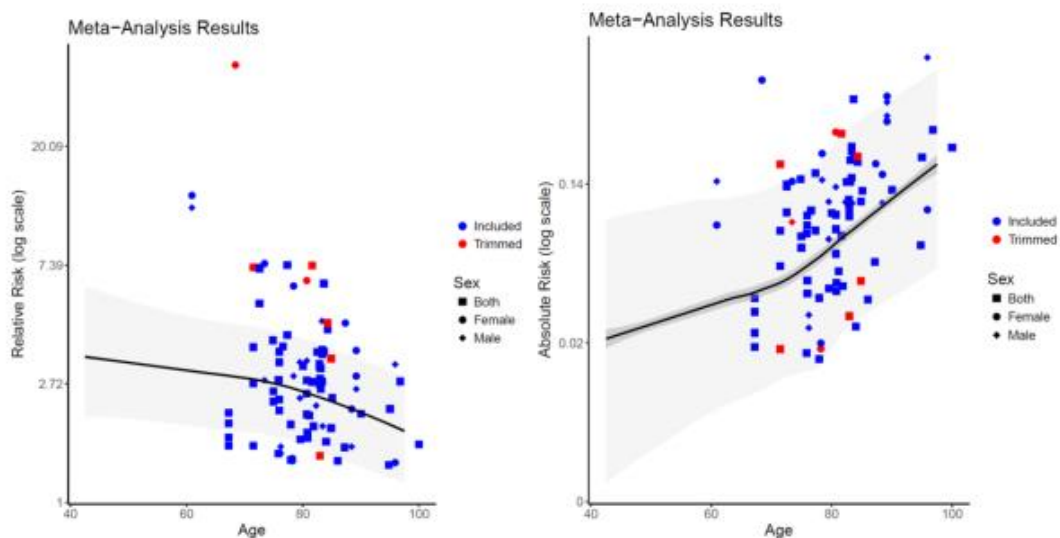

Meta-regression results were used to calculate the total number of excess deaths due to dementia as the product of our prevalence estimates (post-adjustment for dementia caused by other GBD diseases) and our estimates of attributable risk. See the non-fatal write-up on dementia for details on prevalence calculations.

#### *Linked data*

The excess deaths calculated through the multiplication of attributable risk and prevalence represent the total number of excess deaths due to having dementia, which likely includes deaths due to other conditions, such as cardiovascular diseases, that are more common in those with dementia as compared to the general population due to common underlying risk factors such as blood pressure, smoking, and lower educational attainment. In order to subset this total number of excess dementia deaths to calculate the number of deaths that were caused by dementia, we completed an analysis of linked clinical and mortality data. We used mortality records linked to inpatient records, covering all deaths from 2003 to 2017 in the Emilia-Romagna region of Italy. Using these data, we looked for markers of severe, end-stage disease in the clinical records up to one year before death.

To select these markers, for each ICD code that appeared in the data we calculated the difference in the proportion of individuals who died with dementia and had a record of each code in the year before death and the proportion of individuals who died without dementia and had a record of the same code in the year before death. We reviewed the 150 codes with the highest difference and selected codes that indicated end-stage disease, excluding codes for conditions such as cardiovascular disease. Codes for decubitus ulcer, malnutrition, sepsis, pneumonia, urinary tract infections, falling from bed, senility, dehydration, sodium imbalance, muscular wasting, bronchitis, dysphagia, hip fracture, and bedridden status were used as indicators of severe disease.

In order to determine the proportion of excess deaths that were caused by dementia, we calculated the proportion of dementia deaths that had clinical markers of end-stage disease in the year before death, above and beyond the occurrence of end-stage disease markers in those who died without dementia. The subtraction of the proportions with end-stage disease markers in those without dementia from the proportions in those with dementia represents the proportion of individuals who are assumed to have died with severe, end-stage dementia out of total deaths in those with dementia.

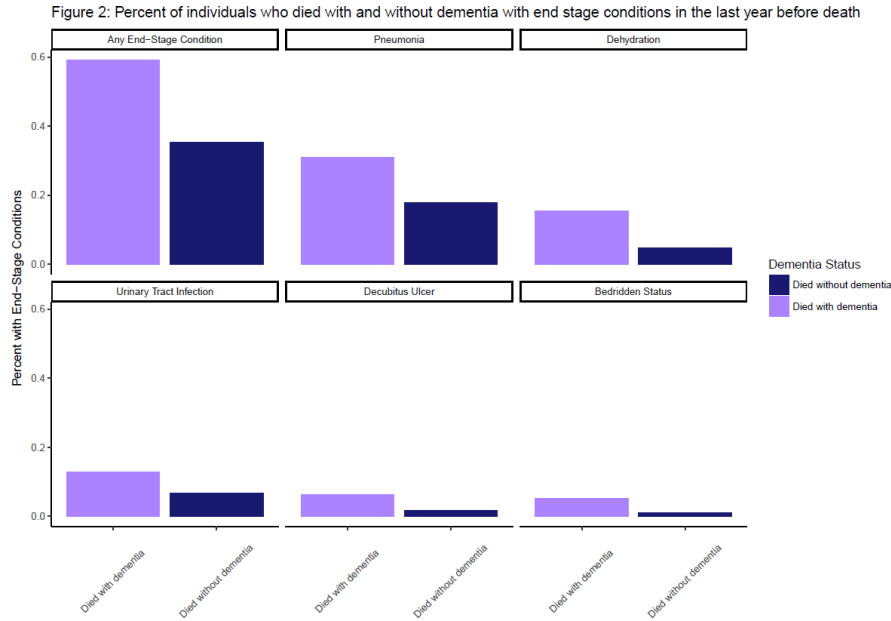

### Calculation of deaths due to dementia

In order to apply these estimates to the total excess deaths we then adjusted these proportions to calculate the proportion of individuals who died with severe, end-stage dementia out of excess dementia deaths using the formula:

$$\frac{\text{Died with Severe Disease}}{\text{Excess Dementia Deaths}} = \frac{\text{Died with Severe Disease}}{\text{Total Dementia Deaths}} * \frac{\text{Relative Risk}}{\text{Relative Risk} - 1}$$

We then calculated the number of deaths due to dementia as the product of total excess dementia deaths and the proportion of those who died with severe disease out of excess dementia deaths. These final estimates of deaths due to dementia were then used to adjust data on causes of death from all other causes in vital registration systems.

### Interpolation for all years

Finally, we used log-linear interpolation to interpolate these results (limited to 1990, 1995, 2000, 2005, 2010, 2015, 2017, 2019) to create estimates for the entire time series from 1980 to 2019. Socio-demographic Index was used as a covariate to extrapolate back to the year 1980.

## 4.2. Alzheimer’s disease and other dementias (non-fatal modelling)

### Flowchart

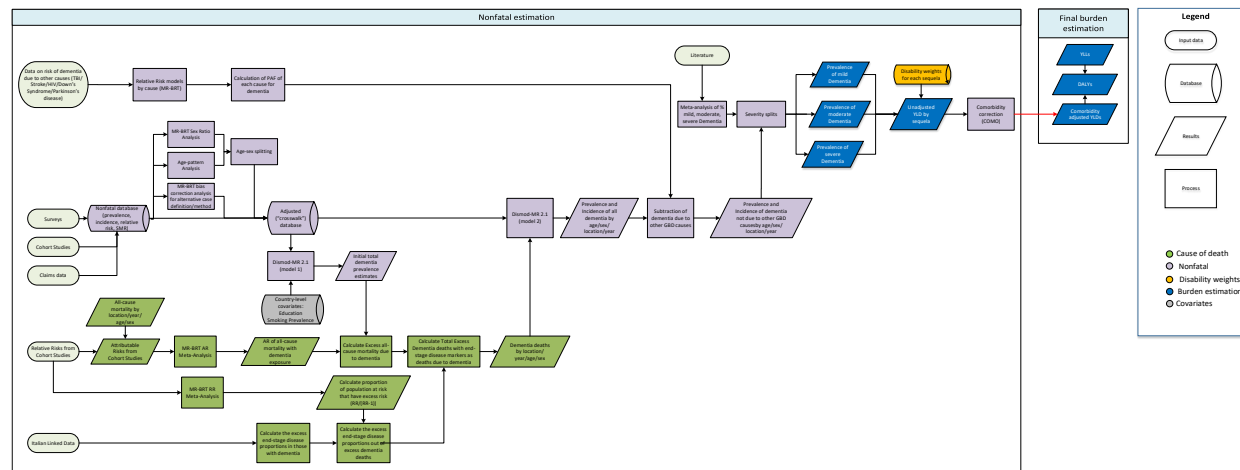

### Input data and methodological summary

#### Case definition

Dementia is a progressive, degenerative, and chronic neurological disorder typified by memory impairment and other neurological dysfunctions. For the purposes of GBD 2019, we use the Diagnostic and Statistical Manual of Mental Disorders III, IV or V, or ICD case definitions as the reference. The DSM-IV definition is:

- Multiple cognitive deficits manifested by both memory impairment and one of the following: aphasia, apraxia, agnosia, disturbance in executive functioning
- Must cause significant impairment in occupational functioning and represent a significant decline.
- Course is characterized by gradual onset and continuing cognitive decline
- Cognitive deficits are not due to other psychiatric conditions
- Deficits do not occur exclusively during the course of a delirium

A wide array of diagnostic and screening instruments exists, including Clinical Dementia Rating scale (CDR), Mini Mental State Examination (MMSE), and the Geriatric Mental State (GMS). For severity rating purposes we use the CDR as the reference. The relevant ICD-10 codes for dementia are F00, F01, F02, F03, G30, and G31. The ICD-9 codes are 290, 291.2, 291.8, 294 and 331.

Unlike most causes in the Global Burden of Disease project, dementia mortality and morbidity estimates are modelled jointly. This is because of marked discrepancies between prevalence data and cause of death data. Specifically, prevalence data suggest little to no variation over time (eg, 1990–2019), whereas age-standardised mortality rates in vital registrations in high-income countries have increased multiple times over this same period. Additionally, prevalence variation between countries is much smaller than the variation in death rates assigned to dementia in vital registration. We attribute these discrepancies to changing coding practices rather than epidemiological change.

Because of this joint procedure, descriptions of the mortality estimation process are included where relevant.

#### Model inputs

To inform our estimates of burden due to dementia, we use mortality data from relative risk studies and linked hospital to mortality data, as well as prevalence data from surveys and administrative data such as claims sources.

***Item Response Theory for prevalence prediction***

The prevalence models for dementia are data sparse, and there are not many surveys done in low-income settings. However, there are a larger body of surveys that collect data on cognitive tests and functional limitations which are the two main components of a DSM or ICD diagnosis. Predictions of dementia prevalence using information from these questions would allow for expanded data coverage and additional information in locations where there are currently no data guiding estimates.

Generating these predictions requires calibrating a model to samples that have information about both functional limitations, cognition, and adjudicated dementia diagnoses. However, making comparisons across surveys can be difficult, as each survey asks a different set of questions about cognition and limitations, although there is some overlap. This overlap allows for the use of item response theory methods for the harmonization of these scales. Once the scales are harmonized the subsamples can be utilized to create a model for the prediction of prevalence.

In GBD 2019, data from the ADAMS and HRS surveys were extracted and used for Item Response Theory modelling to estimate prevalence. HRS is a nationally representative survey in the US, which has data on cognition and functional limitations. ADAMS is a subsample of HRS that includes much more detailed neuropsychological testing and adjudicated dementia diagnoses. ADAMS includes almost all questions in HRS plus additional questions as well.

***Excluding incidence***

Since 2016, we have made the decision to exclude incidence data, because in locations with high quality cohort data on prevalence and incidence, the two are not compatible (incidence data implies a higher prevalence than what is reported). Because dementia has a slow, insidious onset and prevalence is easier to measure, we trust prevalence data more and rely on this, excluding incidence data from DisMod.

***Severity splits***

Methods to determine severity splits for dementia were redesigned in GBD 2019. A new systematic review was conducted to collect information on the proportion of individuals in each dementia severity class out of the population of all individuals with dementia. There are a variety of commonly used methods for severity rating; for the purposes of GBD 2019, we took the Clinical Dementia Rating (CDR) scale as our reference definition for severity classification, along with a doctor-given diagnosis according to DSM III, IV, V or ICD case definitions as our reference definition for dementia.

However, as a neurodegenerative disorder with a wide range of categories in which symptoms manifest, there are an abundance of classification tools which discern between severity levels along different criteria. We accepted severities classified by:

- Clinical dementia rating sum-of-boxes (CSR-SB)
- Blessed test of information, memory, and concentration (BIMC)
- Global deterioration scale (GDS)
- Geriatric Mental State Examination (GMS)
- CAMDEX
- DSM-III-R
- Karasawa's

We excluded any studies which classified dementia severity according to scales that only evaluated cognitive function and memory, excluding activities of daily living (ADLs). The most prominent such scale is MMSE.

The following search string was used:

*((dementia[MeSH Terms] OR dementia[Title] OR Alzheimer disease[Title]) AND (severity[Title/Abstract] OR CDR[Title/Abstract] OR Clinical Dementia Rating Scale[Title/Abstract]) AND (Severity of illness index[MeSH] OR*

*diagnosis[sh] OR Cross-Sectional Studies[MeSH]) AND ("1950/01/01"[Date - Publication] : "2100/02/25"[Date - Publication]) NOT (animals[MeSH] NOT humans[MeSH])*

**Prisma diagram of dementia severity split systematic review**

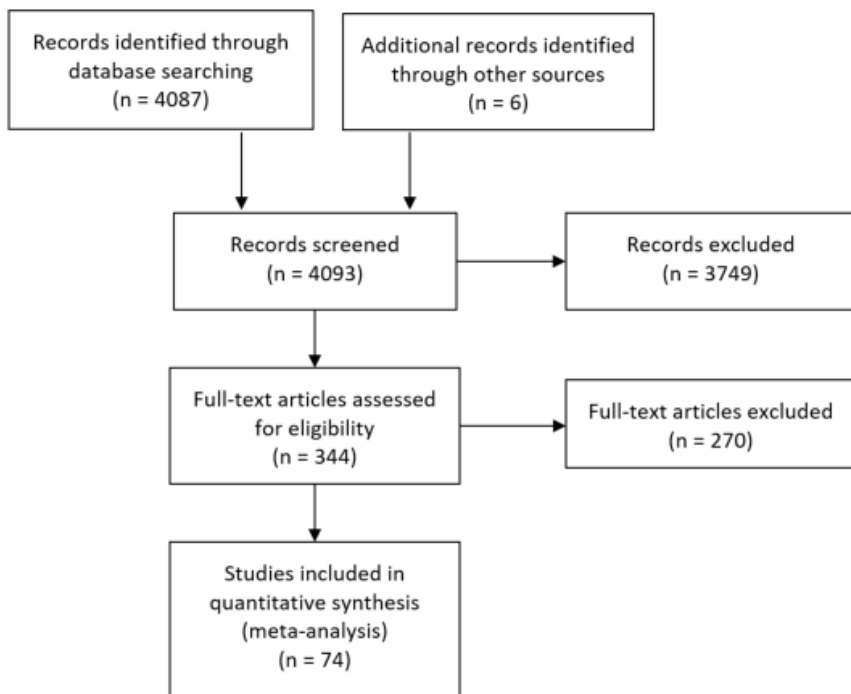

This yielded 4087 total hits, of which 338 passed initial title/abstract screening. After full-text screening, 68 sources met screening criteria and were extracted, along with one source identified through the bibliographies of other sources, and five additional sources used in GBD 2017 for other purposes. A total of 74 sources were extracted and informed the severity split, as compared to the 11 sources used in GBD 2017.

The severity split analysis was conducted using a MR-BRT meta-regression instead of being analysed as binned meta-analyses as in GBD 2017.

We multiplied estimations of prevalence (country-year-sex-age-specific) by the fractions of mild, moderate, and severe dementia and estimated 95% uncertainty intervals at the 1000-draw level. The severity distributions over age for each sex are visualized below, followed by a table describing each severity.

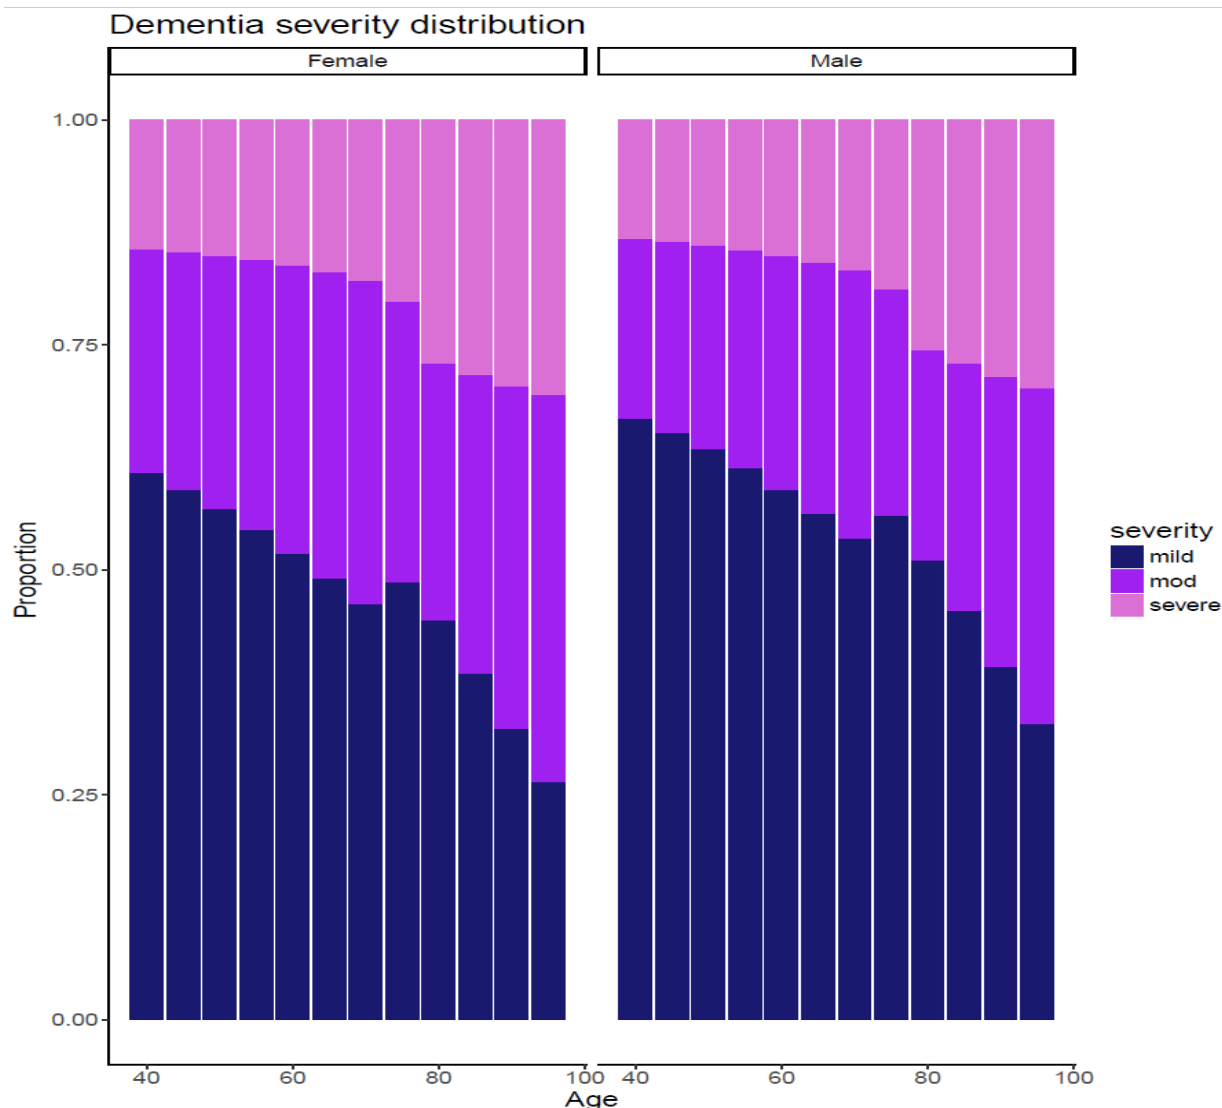

Figure. Severity ratios for each 5-year age bin, by sex.

Table of dementia severity levels.

| Severity level | Lay description                                                                                                                                                                                                                                                                                                           |
|----------------|---------------------------------------------------------------------------------------------------------------------------------------------------------------------------------------------------------------------------------------------------------------------------------------------------------------------------|
| Mild           | The person has some trouble remembering recent events and finds it hard to concentrate and make decisions and plans. They may have slight to moderate difficulty engaging in community affairs, complicated hobbies, and intellectual interests.                                                                          |
| Moderate       | The person retains highly learned material, but has severe memory problems, is disoriented with respect to time and sometimes place. They are severely impaired in their ability to handle problems and make social judgements. They require assistance with daily activities, and only retain simple chores and hobbies. |
| Severe         | The person has complete memory loss, no longer recognizes close family members, and requires help with all daily activities, including personal care.                                                                                                                                                                     |

**Relative risk due to other causes**

While the DSM definition excludes dementia cases, where the syndrome is caused by other psychiatric disorders, it does not exclude dementia cases caused by other diseases, not included in DSM. This includes, stroke, Parkinson’s



disease, Down’s syndrome and traumatic brain injury (TBI), which are found elsewhere in the GBD cause list. To prevent double counting of prevalent cases, both under dementia and each of these other causes, we adjusted our dementia prevalence to exclude cases caused by these other conditions. To do so, in GBD 2019 we used data from the Aging, Demographics and Memory study (ADAMS), to estimate the relative risk of getting dementia for each condition included in the ADAMS dataset (stroke, Parkinson’s disease, TBI). We then conducted more extensive systematic reviews on all five of these conditions to model each separately. Relative risk models were run using MR-BRT, and population attributable fractions (PAF) for each condition were calculated with the following equation, where exposure is defined as the prevalence of condition:

$$PAF = \frac{exposure * (RR - 1)}{[exposure * (RR - 1)] + 1}$$

Finally, attributable burden was calculated as the PAF multiplied by total burden (i.e. dementia incidence/prevalence).

### Modelling strategy

First, prevalence data was sex split, crosswalked and age split. Studies with age and sex detail separately were split into age- and sex-specific data points. Data specified as “both” sex data were split into male- and female-specific data points using MR-BRT to get a model ratio of female/male prevalence and then using the following equations:

Male prevalence:

$$prev_{male} = prev_{both} * \frac{pop_{both}}{(pop_{male} + ratio * pop_{female})}$$

Female prevalence:

$$prev_{female} = ratio * prev_{male}$$

We also split data points where the age range was greater than 25 years using the global age pattern.

Dementia studies are heterogeneous. Even with a smaller number of definitions (DSM/ICD), there are a large number of different ways to diagnose dementia. Most use a two-step procedure, where you screen using a cognitive test and then only fully evaluate those that fall below a certain pre-defined threshold. We controlled for methods differences by crosswalking alternative case definitions to reference. Study covariates are based on broad categories determined after going through the diagnostic heterogeneity and there are some added for specific criteria that we know are biased. The same study-level covariates were used in 2019 as in 2017 with the addition of Item Response Theory HRS predictions.

### MR-BRT Crosswalk Adjustment Factors for Dementia (Network Analysis)

| Data input                            | Reference or alternative case definition | Gamma | Beta Coefficient, Logit (95% CI) | Adjustment factor* |
|---------------------------------------|------------------------------------------|-------|----------------------------------|--------------------|
| DSM or ICD case definition            | Ref                                      | 0.34  | ---                              | ---                |
| Clinical records diagnosis criteria   | Alt                                      |       | -0.05 (-0.72 – 0.61)             | 0.51               |
| Algorithm diagnosis criteria (AGECAT) | Alt                                      |       | 0.08 (-0.59 – 0.74)              | 0.50               |
| NIA-AA diagnosis criteria             | Alt                                      |       | 0.51 (-0.16 – 1.17)              | 0.53               |
| 10/66 algorithm diagnosis criteria    | Alt                                      |       | 0.97 (0.30 – 1.64)               | 0.50               |
| GP records used for diagnosis         | Alt                                      |       | -1.21 (-1.88 – -0.54)            |                    |

Two country-level covariates were included in the initial DisMod model. Age-standardised education was used as a proxy for general brain health/use that may be protective of dementia – specifically Alzheimer’s disease. Smoking prevalence (age-standardised, both sexes) was also used as a covariate to guide estimates, as the literature has shown a positive relationship between smoking and dementia.

Note that two DisMod models were run with prevalence inputs – the first uses adjusted prevalence data (DisMod Model 1 in flowchart), which accounts for dementia caused by other diseases. The second uses unadjusted dementia (DisMod Model 2 in flowchart) which accounts for all dementia regardless of cause (this is the dementia impairment envelope). The tables below summarize country-level covariates used in each of these DisMod model.

**Covariates.** Summary of covariates used in the Parkinson’s Disease DisMod-MR meta-regression model (adjusted prevalence, Model 1)

| Covariate                             | Type                  | Parameter         | Exponentiated beta (95% Uncertainty Interval) |
|---------------------------------------|-----------------------|-------------------|-----------------------------------------------|
| Smoking prevalence (age-standardized) | Prevalence            | TBD – asking Emma |                                               |
| Healthcare access and quality index   | Excess mortality rate |                   |                                               |

**Covariates.** Summary of covariates used in the Parkinson’s Disease DisMod-MR meta-regression model (unadjusted prevalence, Model 2)

| Covariate                             | Type                  | Parameter | Exponentiated beta (95% Uncertainty Interval) |
|---------------------------------------|-----------------------|-----------|-----------------------------------------------|
| Smoking prevalence (age-standardized) | Prevalence            | 0.005     | 1.00 (1.00-1.01)                              |
| Healthcare access and quality index   | Excess mortality rate | -0.08     | 0.92 (0.92 – 0.92)                            |

As mentioned previously, the estimation of morbidity due to dementia occurs in conjunction with the mortality estimation. Additional details on this process can be found in the COD capstone appendix.

We pull the cause-specific mortality results from final fatal estimates into a final DisMod model (Model 2), with the same settings as the models previous. To prevent double counting of prevalent cases, both under dementia and under other causes that can lead to dementia, we adjusted our dementia prevalence to exclude cases caused by these other conditions, which include stroke, Parkinson’s disease, traumatic brain injury and Down’s Syndrome. To do so, we used data from the Aging, Demographics and Memory study (ADAMS) and new systematic reviews, to estimate the relative risk of getting dementia for each condition included in the ADAMS dataset (stroke, Parkinson’s disease, TBI). We first fit logistic regression models predicting the outcome of dementia given each exposure, with an additional covariate on age.

We then used these models to predict the probability of dementia given each exposure at various ages and divided the probability of having dementia by the probability of not having dementia at each age to calculate relative risks. After calculating age specific relative risks, we used these data and estimates of dementia prevalence from our DisMod-MR 2.1 model to calculate the population attributable fractions (PAFs) for each cause and age using the formula:

$$PAF = \frac{prevalence * (RR - 1)}{prevalence * (RR - 1) + 1}$$

Finally, we multiplied the PAF by the total prevalence to get the amount of dementia prevalence that can be attributed to each cause and subtracted this from the total prevalence to get the prevalence of dementia that is not due to other GBD causes.

### 4.3. Parkinson's Disease (fatal modelling)

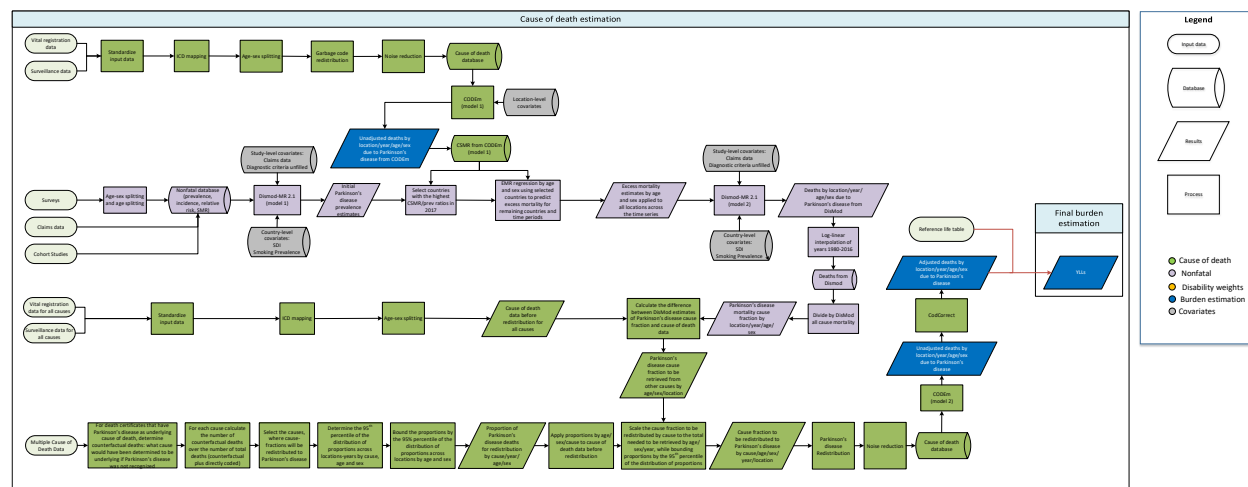

#### Input Data

In GBD 2017, data used to estimate deaths due to Parkinson's disease included mortality data from vital registration systems and prevalence data from surveys and claims sources.

An updated systematic review was conducted from September 2015 to August 2017, and search terms (below) were set to capture studies for Parkinson's disease.

Search terms: *(Parkinson disease[Title/Abstract] OR Parkinson's disease[Title/Abstract]) AND (epidemiology[Title/Abstract] OR prevalence[Title/Abstract] OR incidence[Title/Abstract]) AND ("2015/09/31"[PDAT] : "2017/08/23"[PDAT])*

Inclusion criteria comprised studies that reported prevalence, incidence, remission rate, excess mortality rate, relative risk of mortality, standardized mortality ratio, or with-condition mortality rate. Studies with no clearly defined sample or that drew from specific clinic/patient organizations were excluded. We also added US claims data for 2011 and 2012-2015. No further prevalence or incidence data were added in GBD 2019.

#### Modelling Strategy

##### Overview

Parkinson's disease mortality rates have more than doubled since 1980 in high-quality vital registration systems. We have not seen an equivalent increase in prevalence and incidence data sources. Additionally, the greater than 15-fold variation in mortality rates of Parkinson's disease between countries is much greater the three-fold difference in prevalence and incidence between high-income countries. As it is unlikely that case fatality from Parkinson's disease has dramatically increased over the time period and that it would differ by a very large margin between countries, the hypothesis is that certifying and coding practices have changed over time and at a different pace between countries. For GBD 2016, we decided to employ a modelling strategy which we have previously used to model mortality from Alzheimer disease and other dementias, which avoids spurious large trends over time in the fatal component of the burden of Parkinson's disease by making Parkinson's mortality rates consistent with the rates observed in 2016, relative to prevalence in countries that are most likely to certify or code Parkinson's disease as an underlying cause of death. For GBD 2017, we again employed this strategy.

**Modelling steps**

Fatal modelling for Parkinson's Disease is described in the following steps. The initial steps were not re-run in GBD 2019, and so the Multiple Cause of Death (MCO) Parkinson's disease inputs were identical to those used in the GBD 2017 capstone.

First, we ran a CODEm model for Parkinson's disease and extracted the mortality rates by age, sex, and geography. The covariates used in this intermediary model are displayed below; some have a direction of 0 because this model was run early in the GBD 2019 cycle. The final Parkinson's model has a negative or positive direction specified for all covariates (see final table).

| Level | Covariate                                      | Direction |
|-------|------------------------------------------------|-----------|
| 1     | Cumulative cigarette consumption (10 years)    | -         |
| 2     | Absolute latitude                              | +         |
|       | Cholesterol (total, mean per capita)           | +         |
|       | Sanitation (proportion with access)            | 0         |
|       | Improved water source (proportion with access) | 0         |
|       | Fruit consumption adjusted (g)                 | -         |
|       | Healthcare access and quality index            | -         |
| 3     | Education (years per capita)                   | -         |
|       | Socio-demographic index                        | +         |
|       | Lag distributed income                         | 0         |

Second, we ran a DisMod-MR 2.1 model with all data on incidence, prevalence, and mortality risk (RR, SMR, or with-condition mortality rates) and a setting of zero remission and extracted prevalence by age, sex, and geography. Studies where the case definition of two of the four cardinal symptoms of Parkinson's disease was not filled were crosswalked to studies using the reference case definition. No random effects were used in the model in order to prevent spurious inflation of regional differences due to differences in measurement and measurement error.

Third, we selected the seven countries (France, England, the United States, the Netherlands, Finland, Scotland, and Wales) with the highest cause-specific mortality rate (from step 1) to prevalence (from step 2) ratio in 2017, which also had an age-standardised prevalence rate greater than 0.0005, and a population greater than 1 million.

Fourth, we used a linear effects regression with dummies on age group and sex to predict excess mortality (i.e., the ratio of cause-specific mortality rate and prevalence) by age and sex, the results of which are found in the tables below.

**Table:** Fixed effect coefficients of EMR regression. Outcome: ln(EMR)

| Independent variables | Coef   | Std. error | P value | 95% Confidence Interval |        |
|-----------------------|--------|------------|---------|-------------------------|--------|
| Male                  | 0.288  | 0.036      | 0.000   | 0.218                   | 0.358  |
| Age 40-59             | -3.25  | 0.076      | 0.000   | -3.399                  | -3.101 |
| Age 60-64             | -2.557 | 0.076      | 0.000   | -2.706                  | -2.407 |
| Age 65-69             | -2.021 | 0.076      | 0.000   | -2.17                   | -1.871 |
| Age 70-74             | -1.42  | 0.076      | 0.000   | -1.57                   | -1.271 |
| Age 75- 80            | -0.898 | 0.076      | 0.000   | -1.047                  | -0.749 |
| Age 80-84             | -0.502 | 0.076      | 0.000   | -0.651                  | -0.352 |
| Age 85-89             | -0.248 | 0.076      | 0.001   | -0.397                  | -0.099 |
| Age 90-94             | -0.047 | 0.076      | 0.537   | -0.196                  | 0.102  |
| Constant              | -2.357 | 0.057      | 0.000   | -2.469                  | -2.246 |

**Table:** Predicted EMR values by age and sex (95% CI)

|           | <b>Male</b>           | <b>Female</b>         |
|-----------|-----------------------|-----------------------|
| Age 40-59 | 0·005 (0·004 – 0·005) | 0·004 (0·003 – 0·004) |
| Age 60-64 | 0·01 (0·009 – 0·011)  | 0·007 (0·007 – 0·008) |
| Age 65-69 | 0·017 (0·015 – 0·019) | 0·013 (0·011 – 0·014) |
| Age 70-74 | 0·031 (0·027 – 0·034) | 0·023 (0·02 – 0·025)  |
| Age 75-80 | 0·051 (0·046 – 0·057) | 0·039 (0·035 – 0·043) |
| Age 80-84 | 0·076 (0·068 – 0·085) | 0·058 (0·052 – 0·064) |
| Age 85-89 | 0·099 (0·089 – 0·111) | 0·074 (0·066 – 0·083) |
| Age 90-94 | 0·12 (0·108 – 0·135)  | 0·09 (0·081 – 0·1)    |
| Age 95+   | 0·126 (0·113 – 0·142) | 0·095 (0·085 – 0·106) |

Fifth, these estimates were added to a second DisMod-MR 2.1 model as pertaining to the full 1990–2017 estimation period. For the countries included in the regression, we allowed them to retain their original EMR values when the age-standardized EMR for a country was higher than the age-standardized EMR prediction generated from the regression. These countries retained their age- and sex-specific ratios and entered those also as pertaining to the full 1990–2017 estimation period. Smoking prevalence was used as a country-level covariate. We excluded data for standardized mortality ratio, with-condition mortality rate, and relative risk as we wanted to estimate cause-specific mortality rates that were consistent with the level of excess mortality from the seven chosen countries in 2017.

Sixth, we took the predictions of cause-specific mortality by age, sex, geography, and year that DisMod-MR 2.1 calculated as being consistent with the data on incidence, prevalence, and the priors on excess mortality from step five. Because DisMod-MR 2.1 produces estimates in five-year intervals only, we expanded the time series by log-linear interpolation; values for 1980-1990 were generated using a regression on the entire time series with Socio-demographic index included as a predictor. We divided this cause-specific mortality by the all-cause mortality used in DisMod to calculate the Parkinson's disease cause-fraction based on prevalence data and the excess mortality derived from countries most likely to code to Parkinson's disease as a cause of death.

Seventh, we calculated the difference between this cause-fraction derived from DisMod and the cause-fraction derived from the cause of death data prep process before redistribution in order to get the amount of cause fraction that needed to be retrieved from other causes through the Parkinson's disease redistribution process.

Eighth, in order to calculate where these Parkinson's disease deaths should be retrieved from, we analysed multiple cause of death (MCOd) data.

Ninth, for deaths where Parkinson's disease is the underlying cause of death in the years 2010-2015, we calculated what the underlying cause of death would have been in the counterfactual scenario in which Parkinson's disease had not been recognized. In order to calculate this counterfactual, we examined the causes listed in part one of the chain of the death certificate. For each death certificate chain we looked across the entire dataset from 1980-2015 and determine what the distribution of underlying causes of death was in individuals with that particular death certificate chain. Then, we assigned the counterfactual deaths proportionally to the causes that are listed as underlying in these death certificates. If, over the time period, there were less than 1000 death certificates that had exactly the same death certificate chain, then we included all death certificate chains that had those same causes, but which could additionally include other causes in the chain as well. To assign counterfactual deaths for these chains, we further subsetted the data to death certificate chains where any of the causes in the original death certificate chain were listed as underlying, determined the distribution of underlying causes of death among just this subset, and then assigned counterfactual deaths proportionally in the same manner.

Tenth, once we determined the counterfactual causes of death stemming from all Parkinson's disease deaths from 2010-2015, we calculated the proportion of deaths by cause that should be Parkinson's disease deaths according to the reference data by taking the counterfactual deaths for each cause and dividing by the sum of the counterfactual deaths for that cause plus the directly coded deaths for that cause.

Eleventh, we applied the proportions to cause of death data in cause fraction space and scaled the cause fractions to the total mortality cause fraction to be retrieved based on the DisMod model. We set caps on the percent of deaths that were moved by age, sex, and cause. The caps were determined by finding the 95<sup>th</sup> percentile of the percentages of deaths moved in each age-sex-cause category across all 5-star VR locations. The COD data is then processed using general redistribution strategies and noise reduction.

Finally, the data derived from this process was used in a final CODEm model, using the same covariates as the original CODEm model. These covariates were adjusted for this model in GBD 2019 so that every covariate had a specified directionality (see table below), and with some adjustments for level. These results were then adjusted through CodCorrect and become the final cause of death estimates for Parkinson's disease.

| Level | Covariate                                      | Direction |
|-------|------------------------------------------------|-----------|
| 1     | Cumulative cigarette consumption (10 years)    | -         |
|       | Fruit consumption adjusted (g)                 | -         |
| 2     | Absolute latitude                              | +         |
|       | Cholesterol (total, mean per capita)           | +         |
|       | Sanitation (proportion with access)            | +         |
|       | Improved water source (proportion with access) | +         |
|       | Healthcare access and quality index            | -         |
| 3     | Education (years per capita)                   | -         |
|       | Socio-demographic index                        | +         |
|       | Lag distributed income                         | +         |

The following plots show the influence of each covariate on the four CODEm models (male global, male data rich, female global, and female data rich). A positive standardized beta (to the right) means that the covariate was associated with increased death. A negative standardized beta (to the left) means the covariate was associated with decreased death.

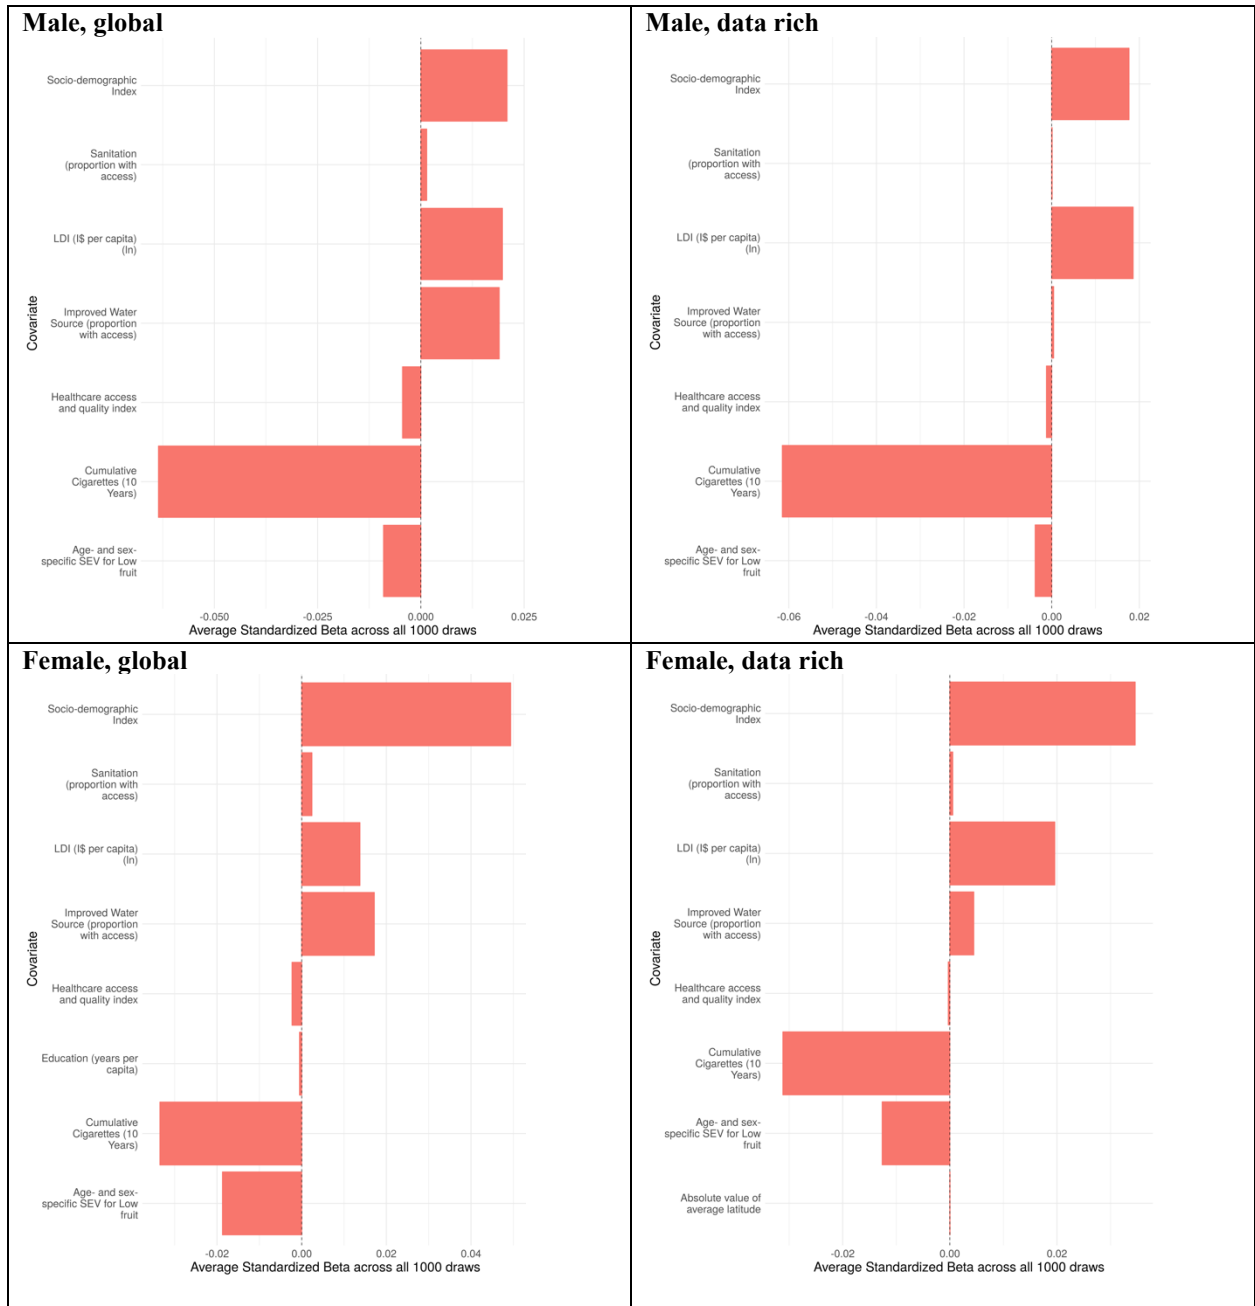

### 4.4. Parkinson’s Disease (non-fatal modelling)

#### Flowchart

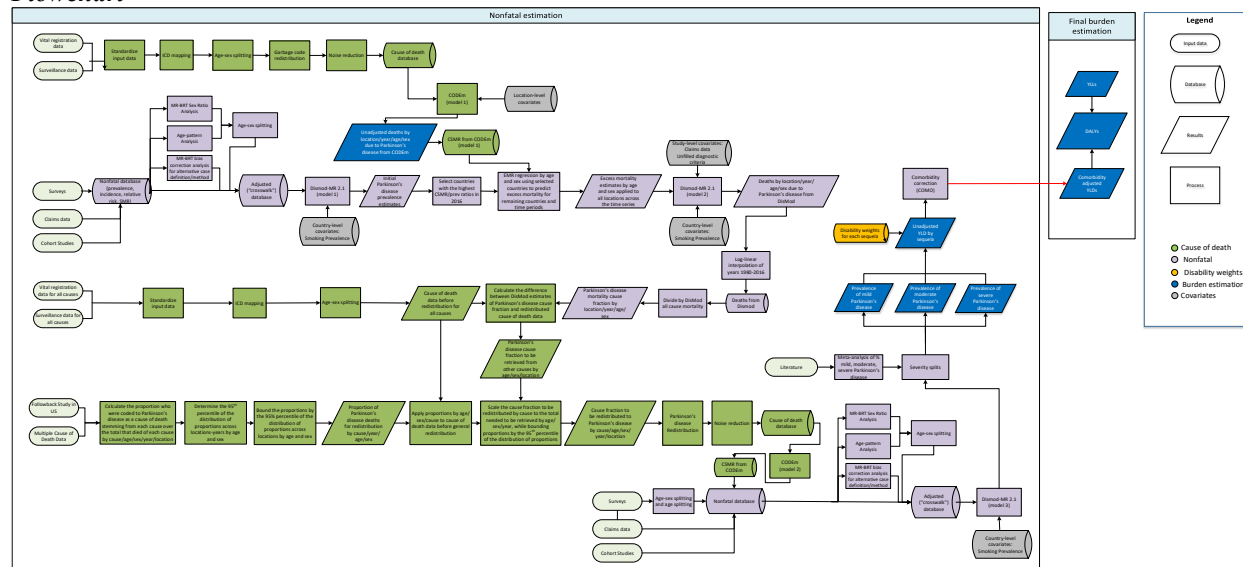

#### Case definition

Parkinson’s disease is a chronic, degenerative, and progressive neurological condition typified by the loss of motor mobility and control – most notably tremors. The corresponding ICD-10 codes are G20, G21, and G22. Our case definition for GBD is the presence of at least two of the four primary symptoms: (1) tremors/trembling, (2) bradykinesia, (3) stiffness of limbs and torso, and (4) posture instability.

Unlike most causes in the Global Burden of Disease project, Parkinson’s disease mortality and morbidity estimates are modelled jointly. This is because of marked discrepancies between prevalence data and cause of death data. Specifically, prevalence data suggest little to no variation over time (eg, 1990–2017) whereas age-standardised mortality rates in vital registrations in high-income countries have increased multiple times over this same period. Additionally, prevalence variation between countries is much smaller than the variation in death rates assigned to Parkinson’s disease in vital registration. We attribute these discrepancies to changing coding practices rather than epidemiological change.

Because of this joint procedure, descriptions of the mortality estimation process are included where relevant, but see the Parkinson’s disease fatal write up for more details.

#### Model inputs

To inform our estimates of burden due to Parkinson’s disease, we use mortality data from vital registration systems, as well as prevalence data from surveys and administrative data such as claims sources.

An updated systematic review was conducted from September 2015 to August 2017, and the search terms (below) were set to capture studies for Parkinson’s disease. This search term resulted in 660 initial hits with 20 sources marked for extraction. Studies with no clearly defined sample or that drew from specific clinic/patient organizations were excluded.

Search terms: *(Parkinson disease[Title/Abstract] OR Parkinson's disease[Title/Abstract]) AND (epidemiology[Title/Abstract] OR prevalence[Title/Abstract] OR incidence[Title/Abstract]) AND ("2015/09/31"[PDAT] : "2017/08/23"[PDAT])*



Studies using non-representative populations are excluded from modelling. Certain studies have been outliered on a case-by-case basis due to subsequent review and exclusion due to inappropriateness of the study design, or case ascertainment that conflict with existing gold-standard data – where possible. We exclude claims data from the year 2000 because these data are systematically lower than other years. As of GBD 2017, a prevalent case is identified from claims data where an individual has one inpatient visit, two outpatient visits, or one outpatient and one inpatient visit (arguing that a single mention of a code for PD in an individual could be a provisional diagnosis prior to confirmation).

### **Modelling strategy**

Studies with age and sex detail separately were split into age- and sex-specific data points. Standard GBD sex splitting methods were used for studies with only “both” sex data points: we modeled the ratio of female/male prevalence in MR-BRT and then calculated male prevalence:

$$prev_{male} = prev_{both} * \frac{pop_{both}}{(pop_{male} + ratio * pop_{female})}$$

And then calculated female prevalence:

$$prev_{female} = ratio * prev_{male}$$

We also split data points where the age range was greater than 25 years. In GBD 2017, age splitting was based on the age pattern from the United States, where we had the most detail by age. In GBD 2019, age splitting was based on the global age pattern from a DisMod model that only used input data with less than a 25-year age range. Data are location split if they are at country level and cover a number of subnationals (or are UK data).

For GBD 2019, adjustment factors for all study-level covariates were determined using matched data (by year, age, sex, location) for reference and alternative case definitions in a logit difference network meta-regression. Study-level covariates included studies that were not population representative, excluded nursing homes from their estimates, followed UKPD Brain Bank diagnosis criteria, followed MDS diagnosis criteria, or did not explicitly define diagnosis criteria. Country covariates are used to inform global patterns. Cause-specific mortality results from the final fatal Parkinson’s disease model is pulled into the final non-fatal DisMod model. The following tables provide an overview of the study-level and country covariates used in the Parkinson’s disease DisMod MR-2.1 model.

### **MR-BRT Crosswalk Adjustment Factors for Parkinson’s Disease**

| Data input                    | Reference or alternative case definition | Gamma | Beta Coefficient, Logit (95% CI) | Adjustment factor* |
|-------------------------------|------------------------------------------|-------|----------------------------------|--------------------|
| 2 of 4 diagnostic criteria    | Ref                                      | 0.48  | ---                              | ---                |
| Not population representative | Alt                                      |       | 0.03 (-0.95 – 1.04)              | 0.51               |
| Excluded nursing homes        | Alt                                      |       | 0.01 (-0.95 – 0.95)              | 0.50               |
| UKPD Brain Bank criteria      | Alt                                      |       | 0.01 (-1.46 – 0.47)              | 0.50               |
| MDS criteria                  | Alt                                      |       | 0.14 (-0.83 – 1.54)              | 0.53               |
| No explicit criteria          | Alt                                      |       | 0.01 (-0.56 – 1.37)              | 0.50               |

### **Covariates.** Summary of covariates used in the Parkinson’s Disease DisMod-MR meta-regression model

| Covariate                             | Type                  | Parameter | Exponentiated beta (95% Uncertainty Interval) |
|---------------------------------------|-----------------------|-----------|-----------------------------------------------|
| Smoking prevalence (age-standardized) | Prevalence            | -1.15     | 0.32 (0.28 – 0.36)                            |
| Healthcare access and quality index   | Excess mortality rate | -0.025    | 0.98 (0.97 – 0.98)                            |

**Severity splits**

As in GBD 2013, we use Hoehn and Yahr stages to determine severity. However, for GBD 2017 onward, the cutpoints were updated in order to more accurately correspond with the lay descriptions of severities. Specifically, a Hoehn and Yahr stage 4 now corresponds to a designation of severe, where before it was classified as moderate.

| Severity | Stage      |
|----------|------------|
| Mild     | $\leq 2.0$ |
| Moderate | 2.5-3.5    |
| Severe   | $\geq 4$   |

Severity estimates were generated by multiplying estimates of prevalence (country-year-sex-age-specific) by the fractions of mild, moderate, and severe PD, and 95% confidence intervals were estimated by taking 1000 draws. The following table provides the lay description and disability weights associated with Parkinson's disease.

| Severity level | Lay description                                                                                                                                                                                                     | DW (95% CI)            |
|----------------|---------------------------------------------------------------------------------------------------------------------------------------------------------------------------------------------------------------------|------------------------|
| Mild           | Has mild tremors and moves a little slowly, but is able to walk and do daily activities without assistance.                                                                                                         | 0.010<br>(0.005–0.019) |
| Moderate       | Has moderate tremors and moves slowly, which causes some difficulty in walking and daily activities. The person has some trouble swallowing, talking, sleeping, and remembering things.                             | 0.267<br>(0.181–0.372) |
| Severe         | Has severe tremors and moves very slowly, which causes great difficulty in walking and daily activities. The person falls easily and has a lot of difficulty talking, swallowing, sleeping, and remembering things. | 0.575<br>(0.396–0.730) |

### 4.5. Idiopathic Epilepsy (fatal modelling)

#### Flowchart

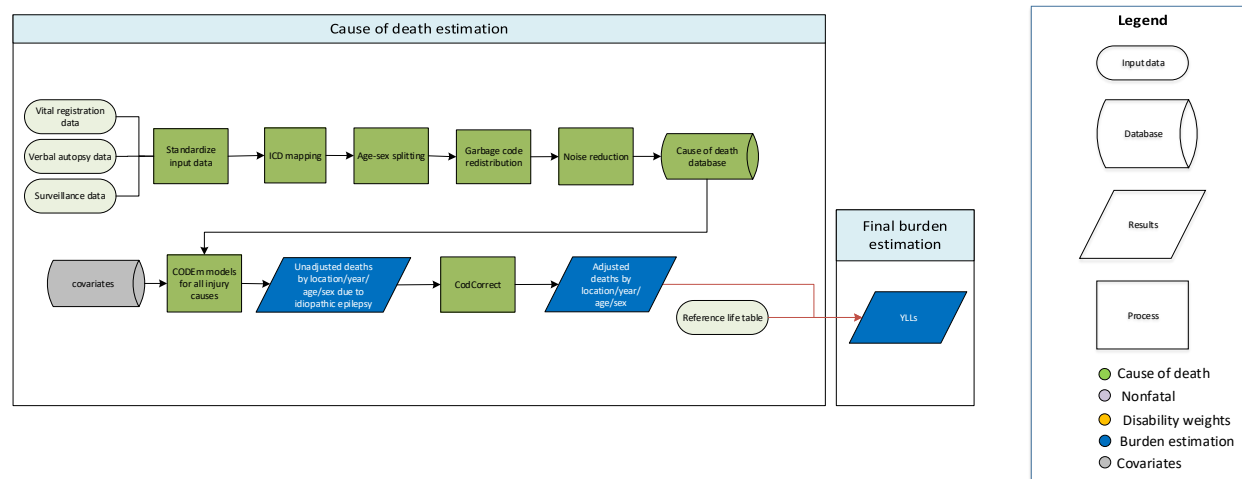

#### Input Data and Methodological Summary for Idiopathic Epilepsy

##### Input data

Data used to estimate epilepsy mortality included vital registration (VR), verbal autopsy, and China mortality surveillance data from the cause of death (COD) database. Our outlier criteria were to exclude data points that were (1) implausibly high or low relative to global or regional patterns, (2) substantially conflicted with established age or temporal patterns, or (3) substantially conflicted with other data sources based from the same locations or locations with similar characteristics (i.e., socio-demographic index).

##### Modelling strategy

The standard CODEm modelling approach (detailed in a appendix section 3.1) was used to estimate deaths due to idiopathic epilepsy. Separate models were conducted for male and female mortality, and the age range for both models was 28 days – 95+ years. Changes to these models relative to GBD 2017, and the complete list of covariates used in GBD 2019 are displayed below. Unadjusted death estimates were adjusted using CoD Correct to produce final estimates of YLLs.

**Table 1. Covariates used in Idiopathic Epilepsy mortality modelling**

| Level | Covariate                             | Direction |
|-------|---------------------------------------|-----------|
| 1     | Pigs (per capita)                     | +         |
|       | SEV scalar: epilepsy                  | +         |
|       | Mean systolic blood pressure (mmHg)   | +         |
| 2     | Health access and quality index       | -         |
|       | Mean body mass index                  | +         |
|       | Mean serum total cholesterol (mmol/L) | +         |
| 3     | Cumulative cigarettes (10 years)      | +         |
|       | Cumulative cigarettes (5 years)       | +         |
|       | Education (years per capita)          | -         |
|       | Log LDI (per capita)                  | -         |
|       | Socio-demographic Index               | -         |

The following plots show the influence of each covariate on the four CODEm models (male global, male data rich, female global, and female data rich). A positive standardized beta (to the right) means that the covariate was

associated with increased death. A negative standardized beta (to the left) means the covariate was associated with decreased death.

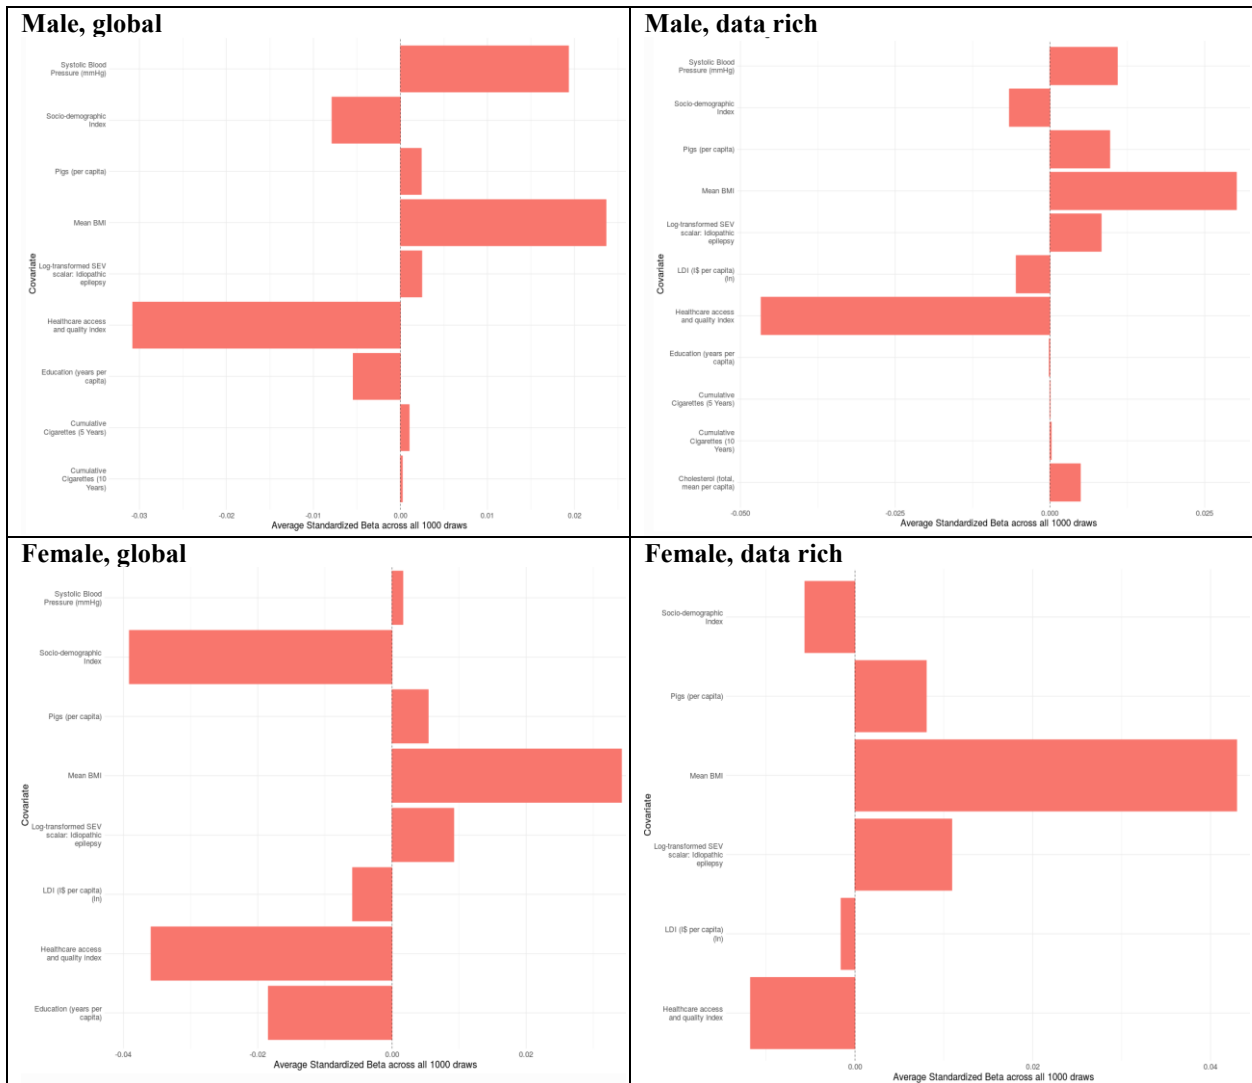

### 4.6. Epilepsy impairment envelope (non-fatal modelling)

#### Flowchart

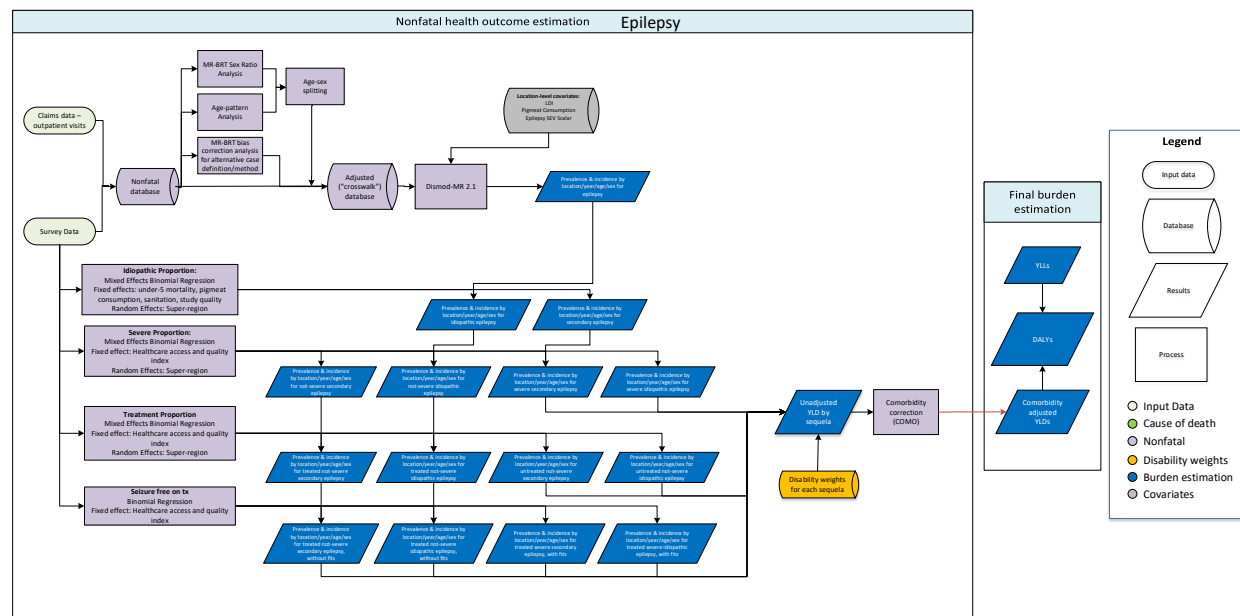

#### Case definition

Since GBD 2013, we have used the following definitions from the “Guidelines for Epidemiologic Studies on Epilepsy”: 1) Epilepsy: a condition characterised by recurrent (two or more) epileptic seizures, unprovoked by any immediate identified cause, and 2) “Active” epilepsy: a prevalent case of active epilepsy is defined as a person with epilepsy who has had at least one epileptic seizure in the previous five years, regardless of antiepileptic drug (AED) treatment. We also use the following ICD-10 codes for epilepsy: G40 (Neuro, epilepsy, total) and G41 (Neuro, epilepsy, status epilepticus). We define severe epilepsy as having seizures one or more times per month.

#### Input data and processing

##### Data inputs

The primary data inputs for the epilepsy modelling strategy were measurements of prevalence, incidence, remission rate, excess mortality rate, relative risk of mortality, standardised mortality ratio, or with-condition mortality rate for all epilepsy, regardless of cause, severity, or treatment status.

For GBD 2016, we conducted a systematic review covering 10/1/2014 to 10/7/2016 using the following search string:

*("2014/10/01"[PDAT] : "2016"[PDAT]) AND ("epilepsy"[MeSH Terms] OR "epilepsy, partial, motor"[MeSH Terms] OR "epilepsy, benign neonatal"[MeSH Terms] OR "epilepsy, reflex"[MeSH Terms] OR "myoclonic epilepsy, juvenile"[MeSH Terms] OR "epilepsy, frontal lobe"[MeSH Terms] OR "epilepsy, complex partial"[MeSH Terms] OR "epilepsy, post-traumatic"[MeSH Terms] OR "epilepsy, temporal lobe"[MeSH Terms] OR "epilepsy, absence"[MeSH Terms] OR "epilepsy, tonic-clonic"[MeSH Terms] OR "epilepsies, myoclonic"[MeSH Terms] OR "epilepsies, partial"[MeSH Terms] OR epilepsy[Title/Abstract]) AND (incidence[Title/Abstract] OR prevalence[Title/Abstract]) NOT(animals[MeSH] NOT humans[MeSH]).*

We included representative, population-based surveys that reported on prevalence, incidence, remission rate, excess mortality rate, relative risk of mortality, standardised mortality ratio, or with-condition mortality rate. We excluded

studies with no clearly defined sample (eg, among clinic attenders or patient organisation members with non-specific or non-representative catchment area).

Additional data inputs include data on the proportion of epilepsy that is primary or idiopathic, the proportion of epilepsy that is severe (one or more fits per month), the proportion of epilepsy that is untreated (the treatment gap), and the proportion of treated epilepsy that is treated without fits (no fits reported in the preceding year).

#### Data processing

For GBD 2019, we started with the final age split dataset used in GBD 2017 - raw data with large age ranges were split into 5 year age bins using the age pattern generated from a Dismod model with input data of only less than 25 years age range. Standard GBD sex splitting methods were used for studies with only “both” sex data points. We modeled the ratio of female/male prevalence in MR-BRT and calculated male prevalence:

$$prev_{male} = prev_{both} * \frac{pop_{both}}{(pop_{male} + ratio * pop_{female})}$$

And then calculated female prevalence:

$$prev_{female} = ratio * prev_{male}$$

For epilepsy, the modelled female/male ratio demonstrated a higher prevalence in males, and was used to proportionally split “both” sex data points into male and female data points (as seen in the figure below).

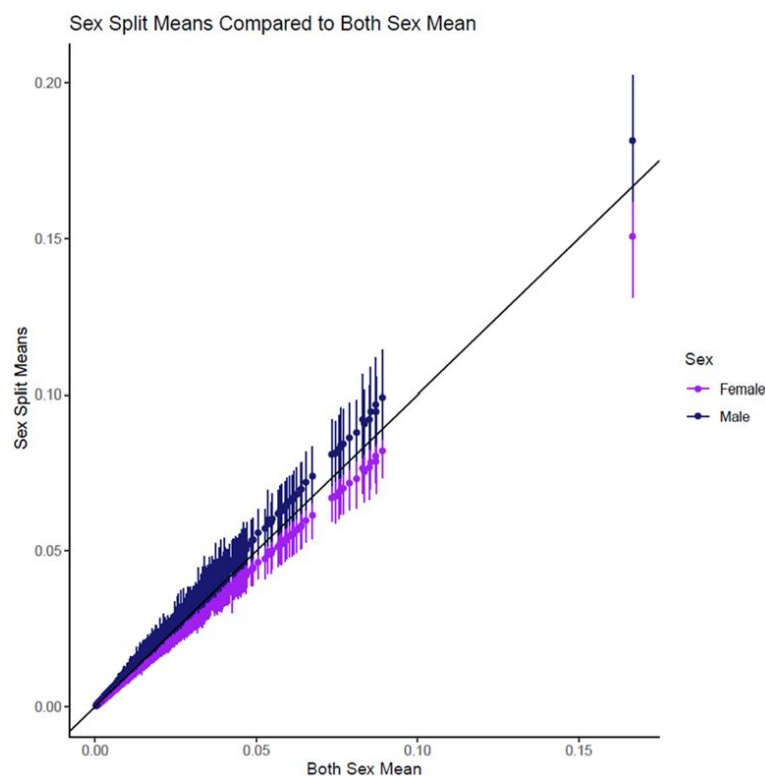

For GBD 2019, adjustment factors for all study-level covariates were determined using matched data (by year, age, sex, location) for reference and alternative case definitions in a log ratio network meta-regression. Studies that asked for lifetime recall were crosswalked to the reference definition for epilepsy.

The table below shows adjustment factors estimated using MR-BRT.

**MR-BRT Crosswalk Adjustment Factors for Epilepsy Impairment Envelope**

| Data input      | Reference or alternative case definition | Gamma | Beta Coefficient, Log (95% CI) | Adjustment factor* |
|-----------------|------------------------------------------|-------|--------------------------------|--------------------|
|                 | Ref                                      | N/A   | N/A                            | N/A                |
| Marketscan      | Alt                                      | 0.26  | -0.86 (-1.40 to -0.33)         | 0.42               |
| Marketscan 2000 | Alt                                      | 0.37  | -1.15 (-1.90 to -0.40)         | 0.32               |
| Recall lifetime | Alt                                      | 0.25  | 0.20 (-0.29 to 0.70)           | 1.22               |

\*Adjustment factor is the transformed Beta coefficient in normal space, and can be interpreted as the factor by which the alternative case definition is adjusted to reflect what it would have been if measured as the reference. Note that all of these crosswalks were run separately as opposed to in a network analysis, but all were adjusted to the same reference definition.

**Modelling strategy**

We modelled the prevalence of epilepsy in two steps: first, we created an epilepsy impairment envelope. Second, we split the envelope into primary (or idiopathic) and secondary epilepsies. Each of these were subdivided into “severe” (on average one or more fits per month) and “non-severe.” Non-severe cases were subdivided into “treated” and “un-treated.” Finally, “treated” cases were divided into “treated cases with fits” (between one and 11 fits on average in the preceding year) and “treated cases without fits” (no fits reported in the preceding year).

In the first step, we used DisMod-MR 2.1 for the epilepsy impairment envelope to model a consistent fit between incidence, prevalence, remission, and standardised mortality ratio data.

We also included the SEV epilepsy scalar, which summarises the epilepsy risk exposure level for each country, as a predictive covariate on prevalence. We included cause-specific mortality rate (CSMR) results from the epilepsy mortality model as input data to the DisMod model. Where age-specific prevalence data were available, we calculated excess mortality rate (EMR) from prevalence and CSMR. We included the log of the lag-distributed income (LDI) as a covariate on EMR to account for lower mortality in developed countries. We included Bayesian priors on remission to account for the scarcity of remission data. We set bounds on remission from 0 to 0.25 from age 0–60 and 0 to 0.05 from age 61–100. The table below indicates the covariates used in the estimation process, as well as parameters, betas, and exponentiated betas.

**Covariates.** Summary of covariates used in the epilepsy impairment envelope DisMod-MR meta-regression model

| Covariate                                                        | Type                  | Parameter | Exponentiated beta (95% Uncertainty Interval) |
|------------------------------------------------------------------|-----------------------|-----------|-----------------------------------------------|
| Log-transformed age-standardized SEV scalar: Idiopathic epilepsy | Prevalence            | 0.76      | 2.14 (2.12-2.18)                              |
| LDI (\$ per capita)                                              | Excess mortality rate | -0.55     | 0.58 (0.38-0.87)                              |

In the second step, we used mixed effects generalised linear models (binomial family) run in GBD 2017 to predict the proportion of idiopathic epilepsy, the proportion of severe epilepsy, the proportion of treated epilepsy and the proportion of epilepsy that is treated without fits.

Because not all of the data on the proportion of idiopathic epilepsy use optimal case finding methods (using CT scans or MRIs in addition to EEGs in order to diagnose secondary epilepsy), we first run an initial linear regression model with a covariate on study quality. We then use the beta from this model to crosswalk studies with non-optimal case finding methods to those with adequate methods. The adjusted data are then used in the regression for the proportion of epilepsy that is idiopathic, with a fixed effect on SDI as well as a random effect on super-region.

We used similar models to predict the proportion of severe epilepsy and treatment gap based on the reported proportions extracted from the systematic review. To predict the proportion of severe epilepsy and the treatment gap, we used mixed-effects models with a fixed effect on the log of HAQ Index and a random effect on super-region.

For the regression to determine the proportion of treated epilepsy cases that have not had a fit in the last year, there is a much smaller dataset, and therefore we cannot use a random effect in the model. Therefore, we use generalised linear model (binomial family) to generate predictions for the proportion of treated epilepsy that is seizure-free with a fixed effect on the log of HAQ Index.

We tested a fixed effect on epilepsy cause-specific mortality, under-5 mortality rate, sanitation, and pig meat consumption as well as random effects on region and country in different models, but they did not improve the models. We generated 1000 draws of country-specific estimates for each year between 1980 and 2017 for each of the models. The table below shows the betas from these regressions.

| Regression           | covariate     | beta  | SE   |
|----------------------|---------------|-------|------|
| Idiopathic           | Study quality | 0.75  | 0.59 |
| Idiopathic           | SDI           | 1.39  | 1.12 |
| Severe               | HAQ Index     | -1.23 | 1.05 |
| Treatment gap        | HAQ Index     | -3.54 | 1.37 |
| Treated without fits | HAQ Index     | 2.49  | 1.87 |

#### ***Severity splits & disability weights***

The table below illustrates the severity levels, descriptions, and disability weights associated with epilepsy. These are calculated using regressions from literature (ie, frequency of seizures).

| Severity level                            | Lay description                                                                                                                                                                                                                                    | Disability weights (95% CI) |
|-------------------------------------------|----------------------------------------------------------------------------------------------------------------------------------------------------------------------------------------------------------------------------------------------------|-----------------------------|
| severe (seizures $\geq$ once per month)   | This person has sudden seizures one or more times each month, with violent muscle contractions and stiffness, loss of consciousness, and loss of urine or bowel control. Between seizures the person has memory loss and difficulty concentrating. | 0.552 (0.375–0.71)          |
| less severe (seizures $<$ once per month) | This person has sudden seizures two to five times a year, with violent muscle contractions and stiffness, loss of consciousness, and loss of urine or bowel control.                                                                               | 0.263 (0.173–0.367)         |
| Treated without fits                      | This person has a chronic disease that requires medication every day and causes some worry but minimal interference with daily activities.                                                                                                         | 0.049 (0.031–0.072)         |



#### 4.7. Multiple Sclerosis (fatal modelling)

##### Flowchart

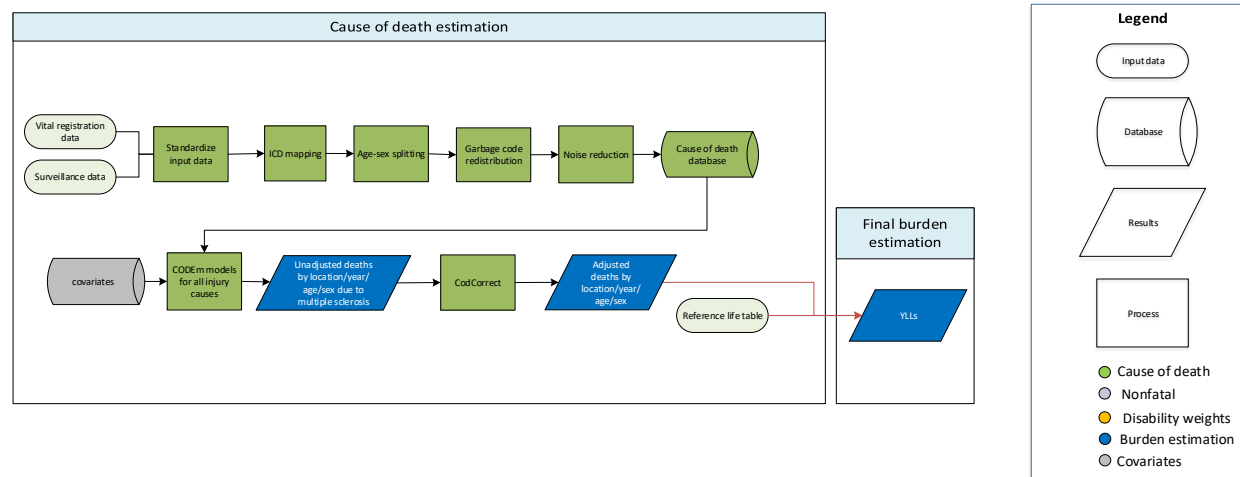

##### Input Data and Methodological Summary for Multiple Sclerosis

###### Input data

Data used to estimate multiple sclerosis included vital registration and surveillance data from the cause of death (COD) database. Our outlier criteria were to exclude data points that (1) were implausibly high or low, (2) substantially conflicted with established age or temporal patterns, or (3) substantially conflicted with other data sources conducted from the same locations or locations with similar characteristics (ie, Socio-demographic Index). In particular, where data-processing could not resolve discrepancies between different coding systems for the same location over time, one system was selected as more reliable and the other was excluded. In particular, this affected Kazakhstan, where the conversion from ICD9-BTL tabulated vital registration data (for years 1981-2003) to ICD10-coded data (for year 2013 onwards) led to an implausible 5-fold increase between 1980 and 2017 and 2017 estimates more than two-fold greater than anywhere else in the world. The ICD10-coded data were excluded.

###### Modelling strategy

The standard CODEm modelling approach was used to estimate deaths due to multiple sclerosis. Separate models were conducted for male and female mortality, and the age range for both models was 5-95+ years (differing from previous years where the age range was 20-95+ years). The linear floor was set to 0.0001. Key changes from GBD 2017 and the full list of covariates used in GBD 2019 are displayed below. Unadjusted death estimates were adjusted using CoDCorrect to produce final estimates of YLLs.

**Table 1. Covariates used in Multiple Sclerosis mortality modelling**

| Level | Covariate                             | Direction |
|-------|---------------------------------------|-----------|
| 1     | Absolute value of average latitude    | +         |
| 2     | Mean serum total cholesterol (mmol/L) | +         |
|       | Health care access and quality index  | -         |
| 3     | Cumulative cigarettes (10 years)      | +         |
|       | Cumulative cigarettes (5 years)       | +         |
|       | Education (years per capita)          | -         |
|       | Log-transformed LDI (per capita)      | -         |
|       | Smoking prevalence                    | +         |
|       | Socio-demographic Index               | +         |

The following plots show the influence of each covariate on the four CODEm models (male global, male data rich, female global, and female data rich). A positive standardized beta (to the right) means that the covariate was associated with increased death. A negative standardized beta (to the left) means the covariate was associated with decreased death.

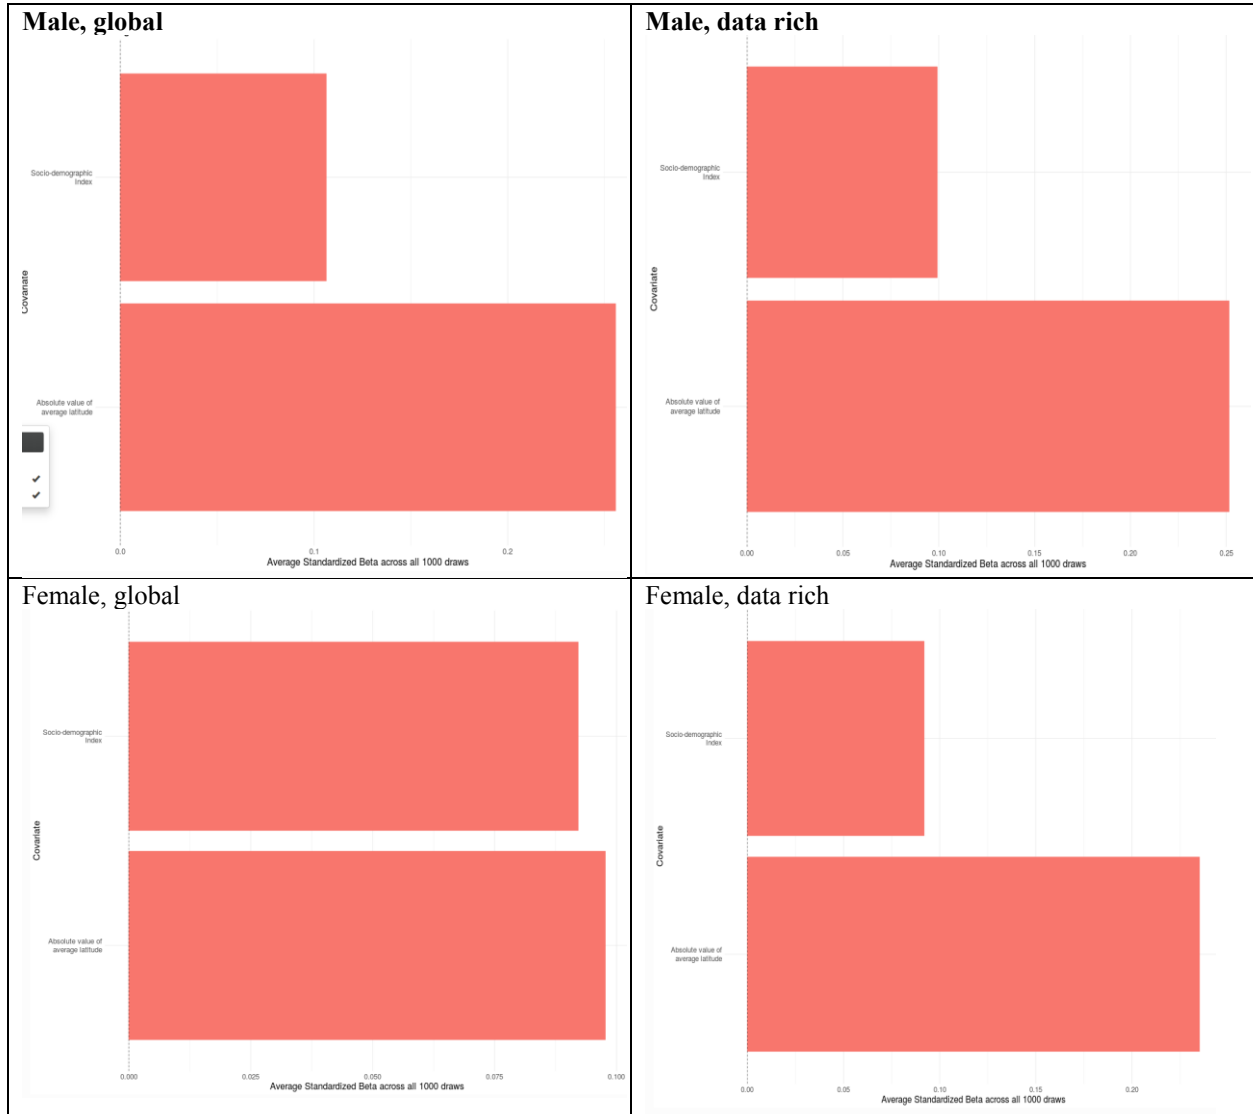

### 4.8. Multiple sclerosis (non-fatal modelling)

#### Flowchart

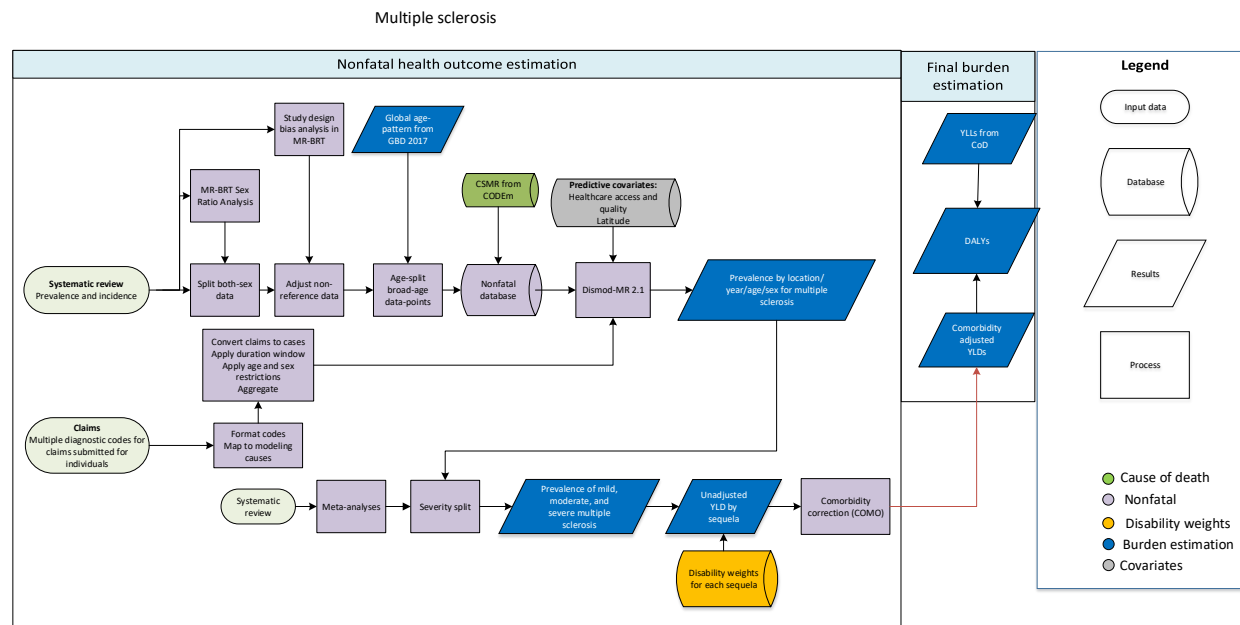

#### Input data and methodological summary

##### Case definition

Multiple sclerosis (MS) is a chronic, degenerative, and progressive neurological condition typified by the damaging of the myelin sheaths. McDonald’s criteria for diagnosis are considered the contemporary gold standard. For GBD 2019, as for previous rounds, diagnosis by McDonald’s criteria, other published criteria (such as Poser, Schumacher, or McAllen criteria), and clinical neurological exam are all treated as reference. The ICD-10 code for MS is G35.

##### Input data and processing

The data underpinning estimates of burden due to MS are generally of two types. The first are representative, population-based, cross-sectional or longitudinal studies reported in peer-reviewed journals and identified via a search-string-based review, last updated for GBD 2017 and described in previous reports. Estimates of epidemiologic measures (prevalence, incidence, etc.) were manually extracted from these publications. The second type are claims data as obtained and processed by the GBD Clinical Informatics team. An individual was extracted from claims data as a prevalent case if they had any peptic ulcer disease code as any diagnosis in one or more inpatient encounters or two or more outpatient encounters.

For studies that reported epidemiologic measures (generally prevalence or incidence) by age for both sexes combined, and also by sex for all ages combined, we calculated the sex-ratio of cases in that study and applied it to the age-specific measures to estimate age-sex-specific measures.

To estimate sex-specific measures from studies that reported only for both sexes combined, we modelled the log sex ratio in MR-BRT using all sex-specific measurements from all other studies in the database and combined these with the GBD sex-specific population estimates for the relevant age-group. For prevalence, this estimate was 0.63 (0.069 to 1.2); for incidence this estimate was 0.86 (0.53 to 1.2). These were applied by calculating male prevalence:

$$prev_{male} = prev_{both} * \frac{pop_{both}}{(pop_{male} + ratio * pop_{female})}$$

and then calculating female prevalence:

$$prev_{female} = ratio * prev_{male}$$

(Equivalent equations were used for incidence.)

After extraction and processing, some studies were marked as outliers and excluded on a case-by-case basis if they were inconsistent with established regional or temporal trends or if concerns about study quality were identified during extraction and processing.

### **Modelling strategy**

#### **Compartmental model**

We used DisMod 2.1 as the main analytical tool for the MS estimation process. Inputs included prevalence and incidence data, as described above, as well as the cause-specific mortality rate (CSMR) estimated in the GBD causes of death analysis, and excess mortality rate (EMR) obtained by dividing CSMR by prevalence data-points. Prior settings included zero remission for all ages, no incidence or excess mortality for persons under 5 years old, and incidence limited to less than 0.000005 after the age of 60 years. We also constrained the super-region random effects for prevalence, incidence, and excess mortality to -1 and 1 for all locations except Greenland, United States, and Canada, where location random effects for incidence were constrained to -4, 2 and 2, respectively.

We employed the following covariates to improve model predictions:

| <b>Covariate</b>                    | <b>Measure</b>        | <b>Beta coeff (95% CI)</b> | <b>Exponentiated</b> |
|-------------------------------------|-----------------------|----------------------------|----------------------|
| Absolute value of average latitude  | prevalence            | 0.041 (0.037 to 0.042)     | 1.04 (1.04 to 1.04)  |
| Absolute value of average latitude  | incidence             | 0.041 (0.036 to 0.045)     | 1.04 (1.04 to 1.05)  |
| Healthcare Access and Quality index | excess mortality rate | -0.027 (-0.037 to -0.022)  | 0.97 (0.96 to 0.98)  |

As described in the literature, extreme latitude is associated with higher prevalence and incidence of MS, although the pathway to explain the association is not understood. Our operationalisation of latitude is created by a population-weighted average of latitude by country and taking the absolute value. The underlying population distribution rasters are part of the Gridded Population of the World dataset.

Although there are no known cures for MS, we expect disease management to differ globally – largely as a function of available resources. To capture this, we use the Healthcare Access and Quality index covariate to capture this relationship in the estimation of excess mortality.

#### **Severity splits**

As we have done since GBD 2013, we used Kurtzke's Expanded Disability Status Scale (EDSS) to determine severity splits for MS. The EDSS scores corresponding to each severity are as follows:

Asymptomatic: EDSS = 0

Mild:  $0 < EDSS \leq 3.5$

Moderate:  $3.5 < EDSS \leq 6.5$

Severe:  $6.5 < EDSS \leq 9.5$

The table below illustrates severity levels, lay descriptions, and DWs.

| <b>Severity level</b> | <b>Lay description</b> | <b>DW (95% CI)</b> |
|-----------------------|------------------------|--------------------|
| Asymptomatic          | -                      | 0<br>(0-0)         |

| <b>Severity level</b> | <b>Lay description</b>                                                                                                                                                               | <b>DW (95% CI)</b>     |
|-----------------------|--------------------------------------------------------------------------------------------------------------------------------------------------------------------------------------|------------------------|
| Mild                  | Has mild loss of feeling in one hand, is a little unsteady while walking, has slight loss of vision in one eye, and often needs to urinate urgently.                                 | 0·183<br>(0·124–0·253) |
| Moderate              | Needs help walking, has difficulty with writing and arm coordination, has loss of vision in one eye and cannot control urinating.                                                    | 0·463<br>(0·313–0·613) |
| Severe                | Has slurred speech and difficulty swallowing. The person has weak arms and hands, very limited and stiff leg movement, has loss of vision in both eyes and cannot control urinating. | 0·719<br>(0·534–0·858) |

Because not all sources had information on the number of cases with EDSS stage 0, instead reporting on a mild category, we implemented a two-step meta-analysis strategy. First, we subsetted the studies to those that reported on the number of cases with EDSS stage 0, and did meta-analyses on the proportion of asymptomatic and mild cases. Then, we conducted meta-analyses on the full dataset to get the proportion mild, moderate, and severe, and we squeezed the asymptomatic and mild categories from the previous meta-analyses into the mild category established by the meta-analysis on the full dataset.

### 4.9. Headaches (non-fatal modelling)

#### Flowchart

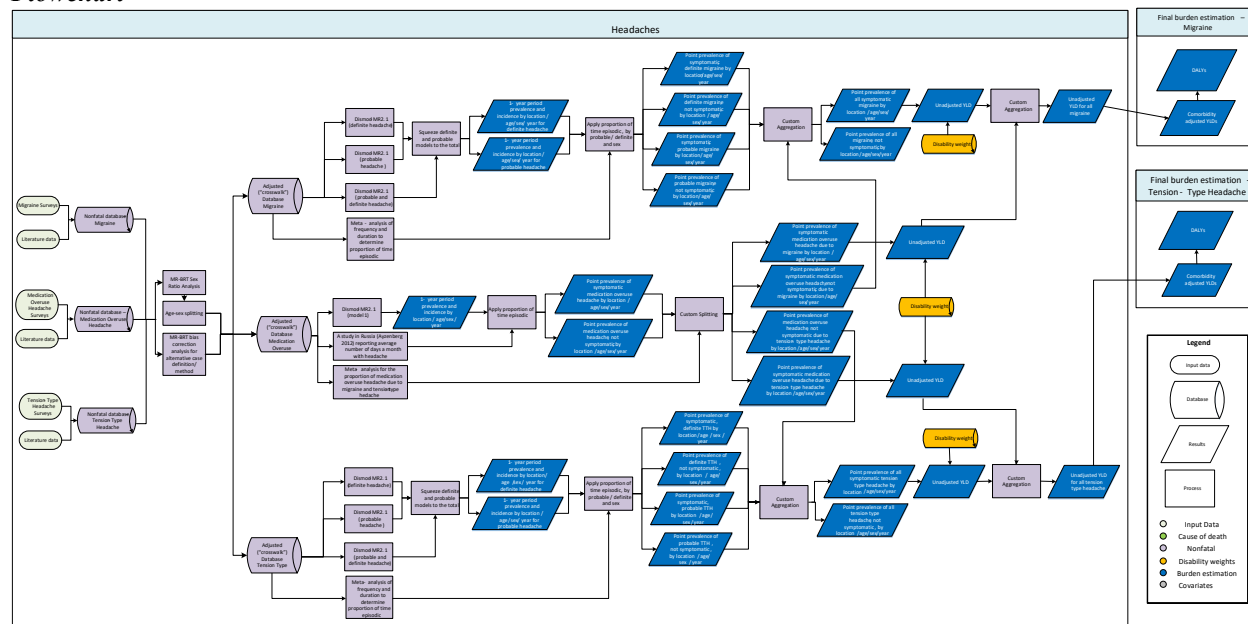

Input Data and Methodological Summary for Headaches

#### Case definition

##### Migraine

Migraine is a disabling primary headache disorder, typically characterised by recurrent moderate or severe unilateral pulsatile headaches. The two major types are migraine without aura and migraine with aura (transient neurological symptoms). In GBD, we do not distinguish between migraine with and without aura as most epidemiological studies report on overall migraine only. The reference diagnostic criteria for migraine are from the International Classification of Headache Disorders (ICHD)-3, which describe five criteria:

1. At least five attacks fulfilling criteria 2-5
2. Headache attacks lasting 4-72 hr (untreated or unsuccessfully treated)
3. Headache has at least two of the following four characteristics:
  - a. Unilateral location
  - b. Pulsating quality
  - c. Moderate or severe pain intensity
  - d. Aggravation by or causing avoidance of routine physical activity
4. During headache at least one of the following:
  - a. Nausea and/or vomiting
  - b. Photophobia and phonophobia
5. Not better accounted for by another ICHD-3 diagnosis

Definite migraine is headache that satisfies all the criteria outlined above, while probable migraine satisfies all of the above criteria except one. Studies that have looked at the reasons for cases with probable headache not fulfilling criteria definite diagnosis have suggested that most often it is the duration criterion that is left unfilled.<sup>23-27</sup> Before GBD 2017 we did not distinguish between probable and definite migraine. Since GBD 2017 we accounted for the varying case definitions used by different sources.

***Tension-type headache***

Tension-type headache (TTH) is characterised by a dull, non-pulsatile, diffuse, band-like (or vice-like) pain of mild to moderate intensity in the head or neck. The reference diagnostic criteria for tension-type headache are from the ICHD-3, which describe five criteria:

1. At least 10 attacks fulfilling criteria 2-5
2. Lasting from 30 minutes to 7 days
3. At least two of the following four characteristics:
  - a. Bilateral location
  - b. Pressing or tightening (non-pulsating) quality
  - c. Mild or moderate intensity
  - d. Not aggravated by routine physical activity such as walking or climbing stairs
4. Both of the following:
  - a. No nausea or vomiting
  - b. No more than one of photophobia or phonophobia
5. Not better accounted for by another ICHD-3 diagnosis

Definite tension-type headache is headache that satisfies all criteria outlined above, while probable tension-type headache satisfies all of the above criteria except one. Before GBD 2017 we did not distinguish between probable and definite tension-type headache. Since GBD 2017 we have accounted for varying case definitions used by different sources.

***Medication overuse headache***

Both migraine and tension-type headache can give rise to medication overuse headache (MOH), with the following International Classification of Headache Disorders (ICHD-3) diagnostic criteria:

1. Headache occurring  $\geq 15$  days/month in a patient with a pre-existing headache disorder
2. Regular overuse for  $>3$  months of one or more drugs that can be taken for acute and/or symptomatic treatment of headache
3. Not better accounted for by another ICHD-3 diagnosis.

ICHD-3 explicitly states that, when a person fulfils criteria for both migraine and MOH, both diagnoses should be given. However, our GBD headache collaborators, Steiner and Stovner, say that in survey practice, a screening question on chronic headache is used first, followed by questions to determine if medication overuse is present. This means the diagnoses of migraine and MOH become mutually exclusive (obviating any potential problem of double-counting).

***Input data******Migraine***

We last conducted a systematic review of migraine for GBD 2017, which covered papers published through September 2017. The search string for this review was ((((((("migraine disorders"[MeSH Terms] OR migraine[All Fields]) AND ((prevalence[Title/Abstract] OR incidence[Title/Abstract] OR remission[Title/Abstract] OR epidemiology[Title/Abstract]))))).

Inclusion criteria of the systematic reviews were:

- Representative, population-based surveys
- Reporting of prevalence of migraine headache

In GBD 2017 we decided to exclude medical claims data as the adjustment needed make the claims data comparable to population representative surveys was unstable.

***Tension-type headache***

We last conducted a systematic review of TTH for GBD 2017, which covered papers published through September 2017. The search string for this review was (((("headache"[MeSH Terms]) OR ("headache"[Title/Abstract] AND "tension"[Title/Abstract])) AND ("epidemiology"[Title/Abstract] OR "prevalence"[Title/Abstract] OR "incidence"[Title/Abstract] OR "remission"[Title/Abstract])))).

Inclusion criteria of the systematic reviews were:

- Representative, population-based surveys
- Reporting of prevalence of TTH headache

In GDB 2017 we decided to exclude medical claims data, as the adjustment needed make the claims data comparable to population representative surveys was unstable.

***Medication overuse headache***

We last conducted a systematic review of MOH for GBD 2017, which covered papers published through September 2017. The search string for this review was (("headache"[MeSH Terms] OR "headache"[Title/Abstract]) AND ("pharmaceutical preparations"[MeSH Terms] OR "pharmaceutical preparations"[Title/Abstract] OR "medication"[Title/Abstract]) AND ("epidemiology"[Title/Abstract] OR "prevalence"[Title/Abstract] OR "incidence"[Title/Abstract] OR "remission"[Title/Abstract])).

Inclusion criteria of the systematic reviews were:

- Representative, population-based surveys
- Reporting of prevalence of MOH headache

***Age and sex splitting***

Reported estimates of prevalence were split by age and sex where possible. First, if studies reported prevalence for broad age groups by sex (eg, prevalence in 15- to 65-year-old males and females separately), and also by specific age groups but for both sexes combined (eg, prevalence in 15- to 30-year-olds, then in 31- to 65-year-olds, for males and females combined), age-specific estimates were split by sex using the reported sex ratio and bounds of uncertainty. Second, prevalence data for both sexes that could not be split using a within-study ratio were split using a sex ratio derived from a meta-analysis of existing sex-specific data using MR-BRT. The female to male ratio was 1.90 (1.85 to 1.96). Finally, after the application of bias adjustments, where studies reported estimates across age groups spanning 25 years or more, these were split into five-year age groups using the prevalence age pattern estimated by the best DisMod-MR 2.1 for each headache type from GBD 2017.

***Data adjustment (Bias adjustments)***

We used a list of binary adjustment criteria which are a modified version of quality indicators of epidemiological studies on headache<sup>28</sup> and shown in the table below.

**Study Covariates**

| Study covariate                   | Notation            |                                                                                                                                                                                      |
|-----------------------------------|---------------------|--------------------------------------------------------------------------------------------------------------------------------------------------------------------------------------|
|                                   | Less desirable (1)  | Reference (zero)                                                                                                                                                                     |
| Other than one-year recall period | Point prevalence    | One-year prevalence                                                                                                                                                                  |
| Not representative                | Selected population | General population or community-based sample from whole country OR general population or community-based sample from defined region within a country, or school-based (for children) |



|                                                          |                                                                                                                                                                                                                                  |                                                                                                                                                                           |
|----------------------------------------------------------|----------------------------------------------------------------------------------------------------------------------------------------------------------------------------------------------------------------------------------|---------------------------------------------------------------------------------------------------------------------------------------------------------------------------|
| <b>Low-quality sampling method</b>                       | Not stated OR no (or failed) attempt to secure representativeness                                                                                                                                                                | Total defined population, or random sample corrected for population demographics OR random sample uncorrected for population demographics                                 |
| <b>Poor response</b>                                     | Not stated, or <70%                                                                                                                                                                                                              | 70–100%                                                                                                                                                                   |
| <b>Low-quality survey method and type of interviewer</b> | Not stated OR self-administered (unsupervised) questionnaire OR telephone or face-to-face interview by untrained or unspecified interviewer(s)                                                                                   | Face-to-face interview with headache expert or trained interviewer                                                                                                        |
| <b>Low-quality validation of diagnostic instrument</b>   | Instrument not specified or not validated OR validated, but sensitivity and/or specificity <70% OR validated only in screen-positive sub-sample, or in clinic or unspecified sample, but sensitivity and specificity $\geq 70\%$ | Validated in target population or similar, and sensitivity and specificity $\geq 70\%$ , or all diagnoses made in face-to-face or telephone interviews by headache expert |
| <b>Low-quality diagnostic criteria</b>                   | Not stated OR stated, other than ICHD OR ICHD (or reasonable modification)                                                                                                                                                       | ICHD (or reasonable modification)                                                                                                                                         |

We also adjusted data reported in studies that were conducted in a school setting. Studies based on lifetime recall of headaches were not included because of the concern of recall bias. For migraine and tension-type headache, we additionally marked studies where the type of headache (probable/definite) was not explicitly mentioned in the report but was determined based on the diagnostic criteria stated.

The mean and standard error for the coefficients were calculated using the MR-BRT adjustment method. All study covariates were initially evaluated independently for each of the three types of headaches. However, covariate values varied not only in magnitude but in direction across the three headache types. Because we assume that the same study covariate should adjust data at least in the same direction for all headache types, the final study covariates were evaluated taking all migraine, tension-type, and medication overuse headache data into account. Studies conducting in a school setting remained in the models but were no longer adjusted in this round of the GBD, as we were unable to find matches to inform a reliable crosswalk. The school setting covariate should be re-tested in a future round of the GBD in which new data has been added to better inform the adjustment factor. These studies were not excluded because the headache models are relatively data sparse. Betas and inverse-logit values for these covariates are shown in the table below:

#### MR-BRT Crosswalk Adjustment Factors for Headaches

| Data input                        | Reference or alternative case definition | Gamma | Beta Coefficient, Logit (95% CI) | Adjustment factor*  |
|-----------------------------------|------------------------------------------|-------|----------------------------------|---------------------|
| Other than one-year recall        | Alt                                      | 1.20  | -0.89 (-0.97 to -0.80)           | 0.30 (0.28 to 0.31) |
| Not representative                | Alt                                      |       | -0.39 (-0.45 to -0.33)           | 0.40 (0.39 to 0.42) |
| Low-quality sampling method       | Alt                                      |       | 0.73 (0.66 to 0.79)              | 0.67 (0.66 to 0.69) |
| Poor response                     | Alt                                      |       | -0.45 (-0.53 to -0.36)           | 0.40 (0.37 to 0.41) |
| Low-quality survey method         | Alt                                      |       | -0.22 (-0.31 to -0.13)           | 0.45 (0.42 to 0.47) |
| Low-quality diagnostic instrument | Alt                                      |       | 0.15 (0.13 to 0.19)              | 0.54 (0.53 to 0.55) |
| Low-quality diagnostic criteria   | Alt                                      |       | -0.37 (-0.43 to -0.32)           | 0.41 (0.39 to 0.42) |
| Headache type assumed             | Alt                                      |       | 0.37 (0.33 to 0.42)              | 0.59 (0.58 to 0.60) |

\*Adjustment factor is the transformed Beta coefficient in normal space, and can be interpreted as the factor by which the alternative case definition is adjusted to reflect what it would have been if measured as the reference.

**Modelling strategy**

As in GBD 2017, standard DisMod settings across all headache models include setting excess mortality to 0, and assuming that there was no incidence or prevalence before the age of 5 years.

**Migraine**

We made no substantive changes in the modelling strategy of migraine from GBD 2017. As in the last round, we ran separate DisMod models for definite migraine, probable migraine, and the total migraine category and set an upper bound on remission of 0.1 across all models. After running the separate models, we then scaled the results of probable and definite headache to the total headache envelope to ensure consistency.

Because some data sources, especially earlier data from before ICHD became the standard (the initial criteria were published in 1988), largely report on definite migraine, we also adjusted studies that reported only on definite migraine to the total migraine category in order to better inform that model. All data that reported on both definite and total migraine were used in regression models by sex in order to derive an age- and sex-specific adjustment. The adjustment is shown in the graphs below.

**Male**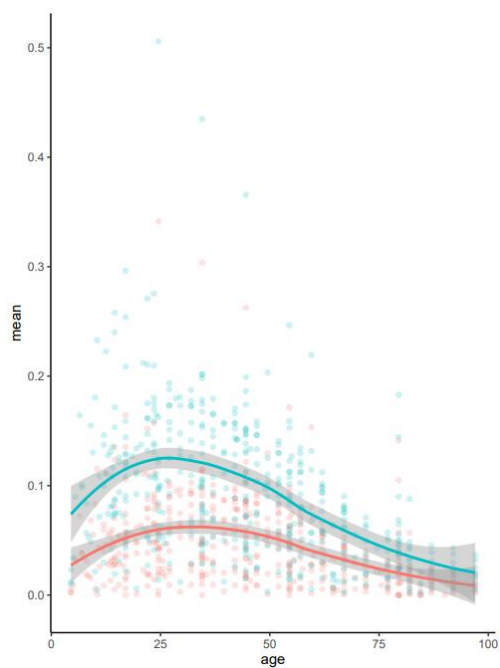**Female**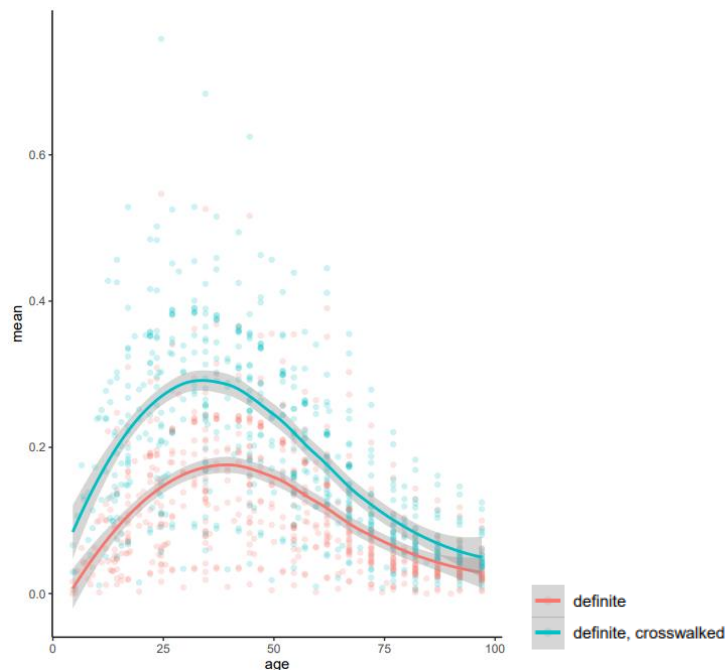

In GBD 2017, to determine the proportion of time over a year spent with migraine headache (“time symptomatic”), we performed a meta-analysis on the frequency and duration of definite headache and total headache combined using the “metafor” package in R. There were not enough data available to obtain reliable estimates on the frequency and duration of probable headache from the literature. As the proportion of time symptomatic for the total migraine category is the weighted average of time symptomatic for definite and probable migraine, weighted by the prevalence of each headache type, the proportion of time symptomatic for probable migraine was calculated as shown below.

$$Time\ Sympt_{Probable} = \frac{Time\ Sympt_{Total} - Prevalence_{Definite} * Time\ Sympt_{Definite}}{Prevalence_{Probable}}$$

For GBD 2019, we used new multi-country survey unit-record data from 19 countries in the Lift the Burden survey series provided by our collaborators on the time symptomatic of various headache types. This source provided greater granularity of time symptomatic data, as we had used summary measures from survey reports instead of microdata in the past. This source also provided data on probable, definite, and total migraine, eliminating the need to back calculate time symptomatic for probable migraine. Using the MR-BRT regression method, we calculated the proportion of time symptomatic is 0.093 for definite migraine and 0.066 for probable migraine.

### ***Tension-type headache***

In GBD 2017, we ran a single model for total tension-type headache. For this round of the GBD, we replicated the modelling process for migraine headache and ran separate DisMod models for definite TTH, probable TTH, and the total TTH category, setting an upper bound on remission of 0.5 across all models. After running the separate models, we then scaled the results of probable and definite headache to the total headache envelope to ensure consistency. Because some data sources, especially earlier data from before ICHD became the standard (the initial criteria were published in 1988), largely report on definite TTH, we also adjusted studies that reported only on definite TTH to the total TTH category in order to better inform that model. Initially, all data that reported on both definite and total TTH were used in regression models by sex in order to derive an age- and sex-specific adjustment. These sex-specific models resulted in an implausible age pattern for females such that the age-pattern of the age-split data points was the inverse of the original data. Consequently, we ran a regression model to derive an age-specific adjustment that was applied to both sexes. The adjustment is shown in the graphs below.

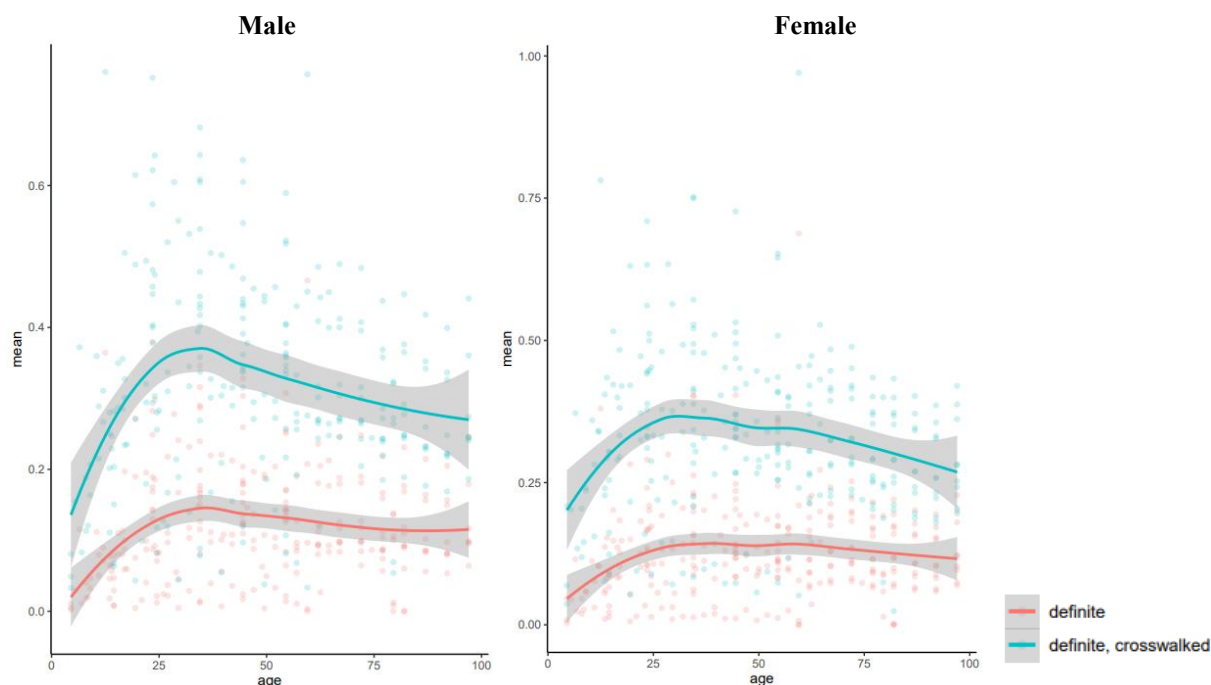

In GBD 2017, a single value derived from a meta-analysis of seven studies on the frequency of the total tension-type headache category was applied to the total TTH model. For GBD 2019 we used the results from the same meta-analysis of Lift the Burden unit-record data on the time symptomatic of headache, which also reported estimates for probable, definite, and total TTH. Using MR-BRT, we calculated the proportion of time symptomatic is 0.029 for definite TTH and 0.021 for probable TTH.

### ***Medication overuse headache***

Prior settings in the DisMod model included an upper bound on remission of 0.4. In GBD 2017, to determine the proportion of time over a year spent with medication overuse headache, we meta-analysed the two available studies

on frequency and used the one available study on duration. The result of the meta-analysis on frequency gave an estimate of 250·83 attacks per year, and the available source on duration estimated an average duration of 18·59 hours. From this data we estimated that the proportion of time symptomatic for medication overuse headache was 0·532. We made no substantive changes in the modelling strategy from GBD 2017.

### ***Medication overuse headache split***

As medication overuse headache can develop from migraine or tension-type headache, we split medication overuse into sequelae of both primary headache disorders. Based on a 2017 meta-analysis of three sources, 73·2% (63·7–81·0) of medication-overuse headache is assigned to medication overuse headache due to tension-type headache. The forest plot is shown below.

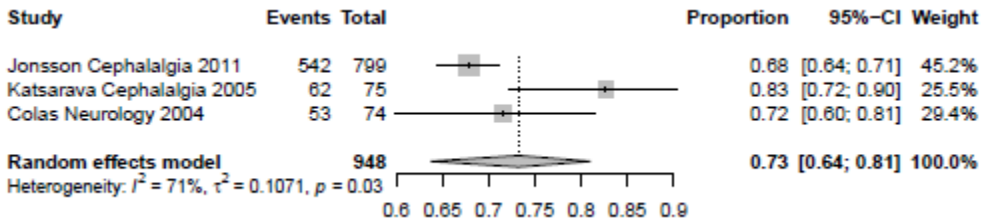

### 4.10. Motor Neuron Disease (fatal modelling)

#### Flowchart

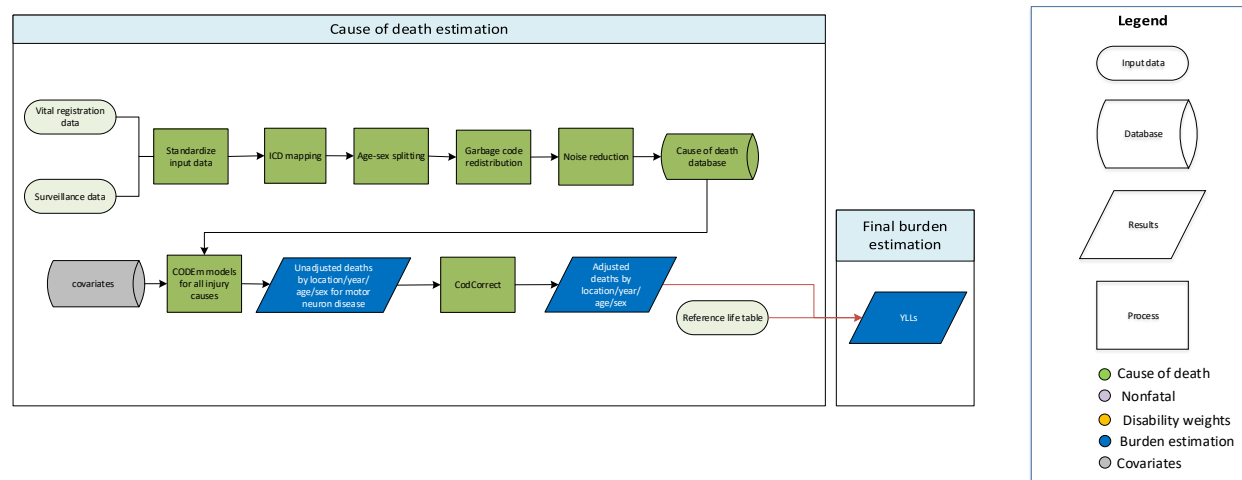

#### Input Data and Methodological Summary for Motor Neuron Disease

##### Input data

Data used to estimate Motor Neuron Disease included vital registration and surveillance data from the cause of death (COD) database. Our outlier criteria were to exclude data points that (1) were implausibly high or low, (2) substantially conflicted with established age or temporal patterns, or (3) substantially conflicted with other data sources from the same locations or locations with similar characteristics (ie, Socio-demographic Index). In GBD 2019, this affected Kazakhstan where ICD9-BTL tabulated vital registration data were available for 1991-2003 and ICD10-coded vital registration were available for 2013 onwards. The raw ICD9-BTL data for 1991 were 14-fold higher than raw ICD9-BTL (1992-2003) and ICD-10 (2013 onwards) causing an implausible time pattern via noise reduction data processing methods for ICD9-BTL data. For that reason, the ICD9-BTL data were excluded and the ICD-10 data retained.

##### Modelling strategy

The standard CODEm modelling approach (described appendix section 3.1) was used to estimate deaths due to multiple sclerosis. Separate models were conducted for male and female mortality, and the age range for both models was 0-days to 95+ years. Unadjusted death estimates were adjusted using CoDCorrect to produce final estimates of YLLs.

**Table 1. Covariates used in Motor Neuron Disease mortality modelling**

| Level | Covariate                                       | Direction |
|-------|-------------------------------------------------|-----------|
|       | Mean total body mass index (kg/m <sup>2</sup> ) | -         |
|       | Mean serum total cholesterol (mmol/L)           | -         |
|       | Absolute value of average latitude              | +         |
|       | Mean diabetes fasting plasma glucose (mmol/L)   | +         |
|       | Fruit consumption (grams per day adjusted)      | -         |
|       | Socio-demographic Index                         | +         |
|       | Health care access and quality index            | -         |
| 2     | Population-weighted mean temperature            | -         |
|       | Sanitation (proportion with access)             | +         |
|       | Improved water source (proportion with access)  | -         |
| 3     | Education (years per capita)                    | +         |
|       | Log-transformed LDI (per capita)                | +         |

"The following plots show the influence of each covariate on the four CODEm models (male global, male data rich, female global, and female data rich). A positive standardized beta (to the right) means that the covariate was associated with increased death. A negative standardized beta (to the left) means the covariate was associated with decreased death.

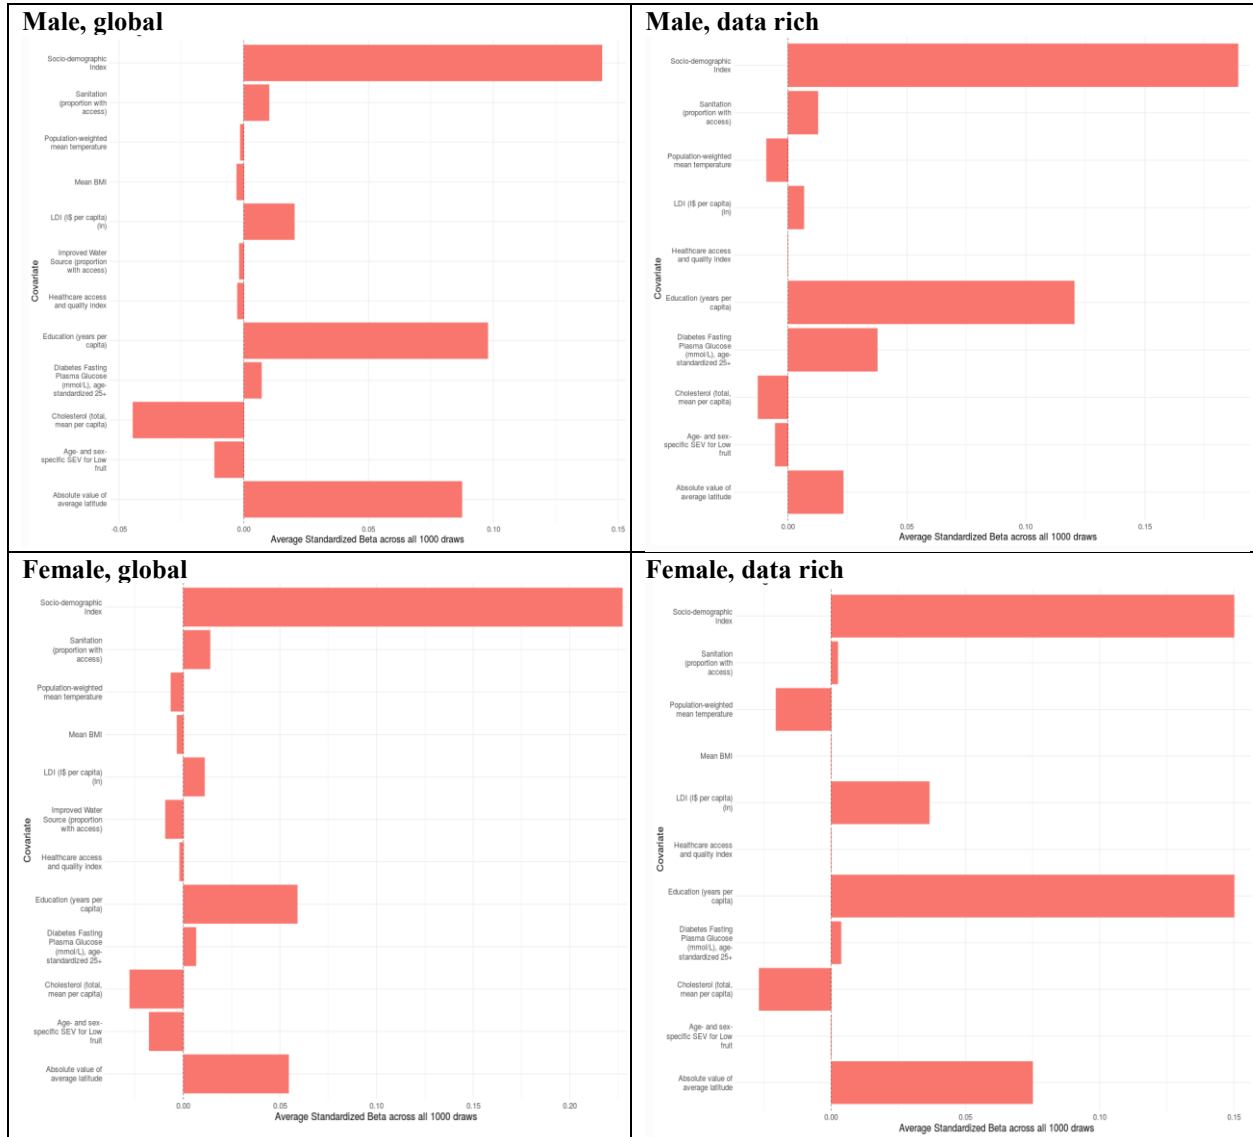

#### 4.11. Motor neuron diseases (non-fatal modelling)

##### Flowchart

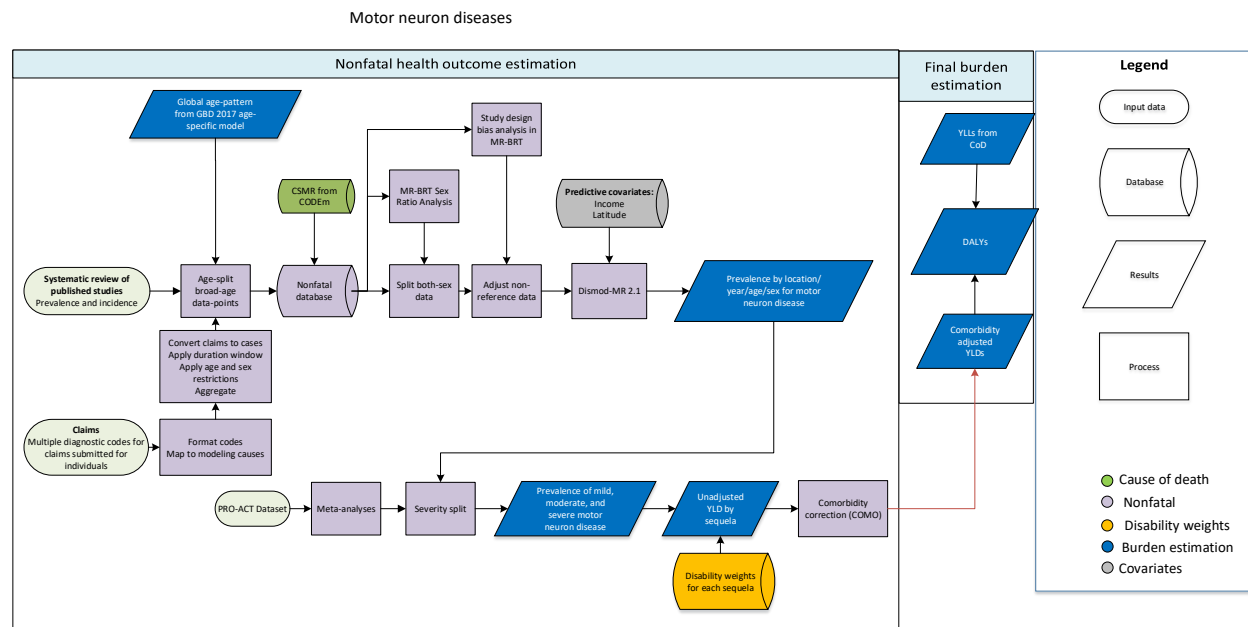

##### Case definition

Motor neuron diseases (MND) are a set of chronic, degenerative, and progressive neurological conditions typified by the destruction of motor neurons and the subsequent deterioration of voluntary muscle activity. The most common MND is amyotrophic lateral sclerosis (ALS). The El Escorial Criteria are the gold standard diagnostic criteria. The ICD-10 code corresponding to motor neuron diseases is G12.

##### Input data and data processing

A full systematic review was last conducted for GBD 2015 and will be updated in a future round of GBD. Selection criteria included: (1) the study is a representative population-based study with well-defined sample; and (2) reports on prevalence, incidence, remission, excess mortality, relative risk of mortality, standardised mortality ratio, or with-condition mortality rate for motor neuron diseases in aggregate or a specified motor neuron disease.

*(('motor neuron disease'[MeSH Terms] OR ('motor'[All Fields] AND 'neuron'[All Fields] AND 'disease'[All Fields]) OR 'motor neuron disease'[All Fields] OR ('motor'[All Fields] AND 'neuron'[All Fields] AND 'diseases'[All Fields]) OR 'motor neuron diseases'[All Fields]) OR ('amyotrophic lateral sclerosis'[MeSH Terms] OR ('amyotrophic'[All Fields] AND 'lateral'[All Fields] AND 'sclerosis'[All Fields]) OR 'amyotrophic lateral sclerosis'[All Fields]) OR ALS[All Fields] OR ('motor neuron disease'[MeSH Terms] OR ('motor'[All Fields] AND 'neuron'[All Fields] AND 'disease'[All Fields]) OR 'motor neuron disease'[All Fields] OR ('primary'[All Fields] AND 'lateral'[All Fields] AND 'sclerosis'[All Fields]) OR 'primary lateral sclerosis'[All Fields]) OR ('Politics Life Sci'[Journal] OR 'pls'[All Fields]) OR ('muscular atrophy, spinal'[MeSH Terms] OR ('muscular'[All Fields] AND 'atrophy'[All Fields] AND 'spinal'[All Fields]) OR 'spinal muscular atrophy'[All Fields] OR ('progressive'[All Fields] AND 'muscular'[All Fields] AND 'atrophy'[All Fields]) OR 'progressive muscular atrophy'[All Fields]) OR PBP[All Fields] OR ('pseudobulbar palsy'[MeSH Terms] OR ('pseudobulbar'[All Fields] AND 'palsy'[All Fields]) OR 'pseudobulbar palsy'[All Fields])) AND (('epidemiology'[Subheading] OR 'epidemiology'[All Fields] OR 'epidemiology'[MeSH Terms]) OR population-based[All Fields])*

Data from the systematic review were manually extracted for GBD 2015. For GBD 2017, data-points referring to broad age-groups were split according to the age-pattern estimated for that datum's location in a preliminary model

that used only age-specific data. For GBD 2019, all previously extracted studies were reviewed and assigned a design variable to indicate if the case definition was limited to ALS only or encompassed all MND.

Beyond data from the systematic review, as in previous rounds of GBD, we made use of claims data as obtained and processed by the GBD Clinical Informatics team and described in a separate section of this Appendix. These data link claims for all inpatient and outpatient encounters for a single individual, and provide primary and secondary diagnoses for all encounters. An individual was extracted from claims data as a prevalent case if they had any MND code as any diagnosis in one or more inpatient encounters or two or more outpatient encounters.

In GBD 2019, all sex-specific data were used to estimate a pooled sex-ratio using MR-BRT. This ratio was combined with sex-specific population estimates for the year-age-location combinations corresponding to each data point reported for both sexes combined, to estimate sex-specific data-points prior to modelling. These were applied by calculating male prevalence:

$$prev_{male} = prev_{both} * \frac{pop_{both}}{(pop_{male} + ratio * pop_{female})}$$

and then calculating female prevalence:

$$prev_{female} = ratio * prev_{male}$$

(Or the equivalent equations for incidence or other epidemiologic measure.)

Two pre-modelling adjustments were then made adjust for systematic biases in some data sources: data reporting on ALS only and data from USA claims in the year 2000 (a database that only covers a small commercially insured sub-population). Two studies of ALS only were found to be closely matched in year, age, sex and time with three studies of MND more broadly, and the log-ratios for all matched pairs were entered into an MR-BRT meta-analysis. Commercial claims data from the USA in 2000 were matched to USA claims data from later years with more complete coverage of the population, and these log-ratios were entered into a separate MR-BRT model.

#### MR-BRT Crosswalk Adjustment Factors

| Data input                                                                                                                                                                                                                         | Reference or alternative case definition | Beta Coefficient, Log (95% CI) | Adjustment factor*  |
|------------------------------------------------------------------------------------------------------------------------------------------------------------------------------------------------------------------------------------|------------------------------------------|--------------------------------|---------------------|
| Surveys of all MND using combined clinical, imaging, electrophysiology and imaging criteria<br>OR<br>Claims data from location-years other than USA 2000                                                                           | Ref                                      | ---                            | ---                 |
| USA claims from year 2000                                                                                                                                                                                                          | Alt                                      | -0.026 (-1.2 to 1.1)           | 0.97 (0.31 to 3.1)  |
| Surveys limited to ALS only                                                                                                                                                                                                        | Alt                                      | -0.13 (-0.23 to -0.029)        | 0.88 (0.79 to 0.97) |
| *Adjustment factor is the transformed Beta coefficient in normal space, and can be interpreted as the factor by which the alternative case definition is adjusted to reflect what it would have been if measured as the reference. |                                          |                                |                     |

After extraction and processing, some studies were marked as outliers and excluded on a case-by-case basis if they were inconsistent with established regional or temporal trends or if concerns about study quality were identified during extraction and processing.

#### Modelling strategy

We use DisMod 2.1 as the main analytical tool for MND estimation. Inputs included prevalence and incidence data, as described above, as well as the cause-specific mortality rate (CSMR) estimated in the GBD causes of death analysis, and excess mortality rate (EMR) obtained by dividing CSMR by prevalence data-points. Prior settings are limited to 0 remission at all ages and maximum incidence of 0.0004. We also constrain the super-region random effects for prevalence and incidence to -0.5 and 0.5 to account for spurious inflation of regional differences.



We employed the following covariates to improve model predictions:

| Covariate                          | Measure               | Beta coeff (95% CI)    | Exponentiated       |
|------------------------------------|-----------------------|------------------------|---------------------|
| Absolute value of average latitude | Prevalence            | 0.032 (0.031 to 0.033) | 1.03 (1.03 to 1.03) |
| LDI (I\$ per capita)               | Excess mortality rate | -0.5 (-0.5 to -0.5)    | 0.61 (0.61 to 0.61) |

Although there are no known cures for MND, we expect disease management to differ globally – largely as a function of available resources. To capture this, we use the natural log of lagged distributed income per capita as a proxy to capture this relationship in the estimation of excess mortality.

As described in the literature, extreme latitude may be associated with higher prevalence and incidence of motor neuron disease, although the pathway to explain the association is not understood. Our operationalisation of latitude is created by a population-weighted average of latitude by country and taking the absolute value. The underlying population distribution rasters are part of the Gridded Population of the World dataset.

### **Severity splits**

To calculate severity and disability due to MND we analysed a dataset from Pooled Resource Open-access ALS Clinical Trials (PRO-ACT). The ALS Function Rating Score (ALSFRS) is an instrument for evaluating the functional status of patients with amyotrophic lateral sclerosis. It can be used to monitor functional changes in a patient over time. It measures (1) speech, (2) salivation, (3) swallowing, (4) handwriting, (5) cutting food and handling utensils (with or without gastrostomy), (6) dressing and hygiene, (7) turning in bed and adjusting bed clothes, (8) walking, (9) climbing stairs, and (10) breathing. Each task is rated on a 5-point scale from 0 = can't do, to 4 = normal ability. Individual item scores are summed to produce a reported total score of between 0 and 40 (worst to best). ALSFRS has been revised to ALSFRS-R, which includes 12 questions (ALSFRS Q10 changes to (10) Dyspnea, (11) Orthopnea, and (12) Respiratory insufficiency), with individual item scores summed to a score between 0 and 48.

In order to eliminate any bias from the treatment effects on the ALSFRS, only the first observation at the time of trial is selected. If the first observation is missing at the time of trial (or prior), the next non-missing observation is selected to be included in the final analysis.

We subsequently mapped ALSFRS scores into GBD severities, and sequelae into different combinations of speech problems, chronic obstructive pulmonary disease, and motor impairment using the following logic:

### **Motor impairment**

The ALSFRS assess motor function of the legs through questions on walking (Q8) and stair climbing (Q9).

| Combined score | Severity level |
|----------------|----------------|
| 8              | None           |
| 5-7            | Mild           |
| 2-4            | Moderate       |
| 0-1            | Severe         |

The ALSFRS also assesses motor impairment through questions on handwriting (Q4), cutting food and handling utensils (Q5), and dressing and hygiene (Q6).

| Combined score | Severity level |
|----------------|----------------|
| 12             | None           |
| 9-11           | Mild           |
| 3-8            | Moderate       |
| 0-2            | Severe         |

After determining case severity on these two separate metrics, we aggregate by taking the most severe ranking (eg, severe + mild = a severe case).

### Respiratory problems:

Question 10 of the ALSFRS describes breathing difficulty as a function of MND.

| ALSFRS score | Description                                                      | Severity level |
|--------------|------------------------------------------------------------------|----------------|
| 4            | Normal                                                           | None           |
| 3            | Shortness of breath with minimal exertion                        | Mild           |
| 2            | Shortness of breath at rest                                      | Moderate       |
| 0-1          | Intermittent ventilator assistance required/ventilator-dependent | Severe         |

### Speech problems

Speech impairment due to MND is derived from ALSFRS question 1, which describes speech impediments. A score of 4 on this question denotes no impairment, while all other values suggest some impairment.

### Creating sequelae

After determining the severity status of each case for the three symptom umbrellas, we subsequently estimated the relative proportion of each combination of symptom class and their respective severities. Those without any symptoms (eg, no severity) were categorised as having worry about the diagnosis for disability estimation. The following table displays the various sequelae and their associated proportions.

| Sequela                                                                                                  | Proportion (Mean) | Proportion (Lower) | Proportion (Upper) |
|----------------------------------------------------------------------------------------------------------|-------------------|--------------------|--------------------|
| Mild motor impairment, mild respiratory problems and speech problems due to motor neuron disease         | 0.01779           | 0.01658            | 0.01909            |
| Mild motor impairment, moderate respiratory problems and speech problems due to motor neuron disease     | 0.00270           | 0.00225            | 0.00324            |
| Mild motor impairment, severe respiratory problems and speech problems due to motor neuron disease       | 0.00082           | 0.00059            | 0.00113            |
| Mild motor impairment, and speech problems due to motor neuron disease                                   | 0.02052           | 0.01922            | 0.02190            |
| Moderate motor impairment, mild respiratory problems and speech problems due to motor neuron disease     | 0.03377           | 0.03210            | 0.03552            |
| Moderate motor impairment, moderate respiratory problems and speech problems due to motor neuron disease | 0.00715           | 0.00640            | 0.00799            |
| Moderate motor impairment, severe respiratory problems and speech problems due to motor neuron disease   | 0.00286           | 0.00240            | 0.00342            |
| Moderate motor impairment, and speech problems due to motor neuron disease                               | 0.03041           | 0.02883            | 0.03208            |
| Severe motor impairment, mild respiratory problems and speech problems due to motor neuron disease       | 0.05242           | 0.05035            | 0.05457            |
| Severe motor impairment, moderate respiratory problems and speech problems due to motor neuron disease   | 0.02247           | 0.02111            | 0.02392            |
| Severe motor impairment, severe respiratory problems and speech problems due to motor neuron disease     | 0.01365           | 0.01259            | 0.01479            |
| Severe motor impairment and speech problems due to motor neuron disease                                  | 0.04765           | 0.04567            | 0.04970            |
| Mild respiratory problems and speech problems due to motor neuron disease                                | 0.01157           | 0.01060            | 0.01263            |

| <b>Sequela</b>                                                                          | <b>Proportion (Mean)</b> | <b>Proportion (Lower)</b> | <b>Proportion (Upper)</b> |
|-----------------------------------------------------------------------------------------|--------------------------|---------------------------|---------------------------|
| Moderate respiratory problems and speech problems due to motor neuron disease           | 0.00142                  | 0.00111                   | 0.00182                   |
| Severe respiratory problems and speech problems due to motor neuron disease             | 0.00023                  | 0.00013                   | 0.00043                   |
| Speech problems due to motor neuron disease                                             | 0.02457                  | 0.02315                   | 0.02608                   |
| Mild motor impairment and mild respiratory problems due to motor neuron disease         | 0.02245                  | 0.02109                   | 0.02389                   |
| Mild motor impairment and moderate respiratory problems due to motor neuron disease     | 0.00275                  | 0.00230                   | 0.00329                   |
| Mild motor impairment and severe respiratory problems due to motor neuron disease       | 0.00068                  | 0.00047                   | 0.00097                   |
| Mild motor impairment due to motor neuron disease                                       | 0.10388                  | 0.10103                   | 0.10681                   |
| Moderate motor impairment and mild respiratory problems due to motor neuron disease     | 0.06744                  | 0.06511                   | 0.06985                   |
| Moderate motor impairment and moderate respiratory problems due to motor neuron disease | 0.01302                  | 0.01199                   | 0.01413                   |
| Moderate motor impairment and severe respiratory problems due to motor neuron disease   | 0.00412                  | 0.00356                   | 0.00477                   |
| Moderate motor impairment due to motor neuron disease                                   | 0.20136                  | 0.19760                   | 0.20518                   |
| Severe motor impairment and mild respiratory problems due to motor neuron disease       | 0.06902                  | 0.06666                   | 0.07146                   |
| Severe motor impairment and moderate respiratory problems due to motor neuron disease   | 0.02000                  | 0.01872                   | 0.02137                   |
| Severe motor impairment and severe respiratory problems due to motor neuron disease     | 0.01062                  | 0.00969                   | 0.01163                   |
| Severe motor impairment due to motor neuron disease                                     | 0.15037                  | 0.14702                   | 0.15378                   |
| Mild respiratory problems due to motor neuron disease                                   | 0.00643                  | 0.00571                   | 0.00723                   |
| Moderate respiratory problems due to motor neuron disease                               | 0.00044                  | 0.00028                   | 0.00069                   |
| Severe respiratory problems due to motor neuron disease                                 | 0.00005                  | 0.00001                   | 0.00017                   |
| Asymptomatic, but worry about diagnosis due to motor neuron disease                     | 0.03738                  | 0.03562                   | 0.03921                   |

To determine disability due to these sequelae, we use the standard multiplicative aggregation formula as described in the main text. The following table provides description and disability weight assigned to the sequelae as appropriate.

| <b>Symptom group</b> | <b>Severity level</b> | <b>Lay description</b>                                                                                                                                                                    | <b>DW (95%)</b>        |
|----------------------|-----------------------|-------------------------------------------------------------------------------------------------------------------------------------------------------------------------------------------|------------------------|
| Respiratory problems | Asymptomatic          |                                                                                                                                                                                           |                        |
| Respiratory problems | Mild                  | Has cough and shortness of breath after heavy physical activity, but is able to walk long distances and climb stairs.                                                                     | 0.019<br>(0.011–0.033) |
| Respiratory problems | Moderate              | Has cough, wheezing, and shortness of breath, even after light physical activity. The person feels tired and can walk only short distances or climb only a few stairs.                    | 0.225<br>(0.153–0.31)  |
| Respiratory problems | Severe                | Has cough, wheezing, and shortness of breath all the time. The person has great difficulty walking even short distances or climbing any stairs, feels tired when at rest, and is anxious. | 0.408<br>(0.273–0.556) |
| Motor impairment     | Asymptomatic          |                                                                                                                                                                                           |                        |

| <b>Symptom group</b>    | <b>Severity level</b> | <b>Lay description</b>                                                                                                                               | <b>DW (95%)</b>        |
|-------------------------|-----------------------|------------------------------------------------------------------------------------------------------------------------------------------------------|------------------------|
| Motor impairment        | Mild                  | Has some difficulty in moving around but is able to walk without help.                                                                               | 0·01<br>(0·005–0·019)  |
| Motor impairment        | Moderate              | Has some difficulty in moving around and difficulty in lifting and holding objects, dressing, and sitting upright, but is able to walk without help. | 0·061<br>(0·04–0·089)  |
| Motor impairment        | Severe                | Is unable to move around without help, and is not able to lift or hold objects, get dressed, or sit upright.                                         | 0·402<br>(0·268–0·545) |
| Speech problems         | No                    |                                                                                                                                                      |                        |
| Speech problems         | Yes                   | Has difficulty speaking, and others find it difficult to understand.                                                                                 | 0·051<br>(0·032–0·078) |
| Asymptomatic, but worry | Yes                   | Has a disease diagnosis that causes some worry but minimal interference with daily activities.                                                       | 0·012<br>(0·006–0·023) |

### 4.12. Other Neurological Disorders (fatal modelling)

#### Flowchart

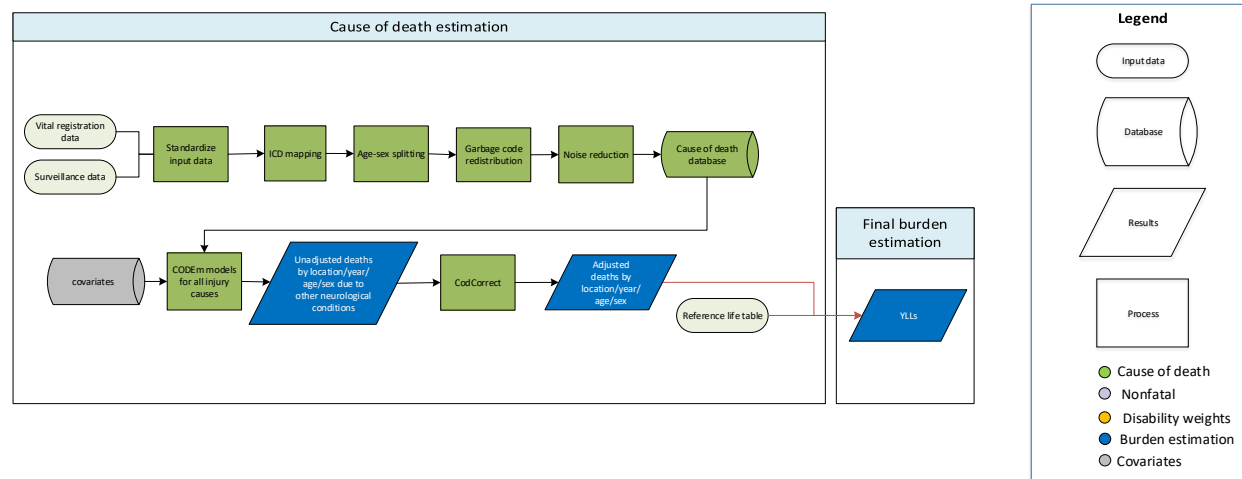

#### Input Data and Methodological Summary for Other Neurological Disorders

##### Input data

Data used to estimate other neurological disorders included vital registration and surveillance data from the cause of death (COD) database. Our outlier criteria were to exclude data points that (1) were implausibly high or low, (2) substantially conflicted with established age or temporal patterns, or (3) significantly conflicted with other data sources conducted from the same locations or locations with similar characteristics. Data excluded as outliers in GBD 2017 continued to be excluded in GBD 2019

##### Modelling strategy

The standard CODEm modelling approach (as described in appendix section 3.1) was used to estimate deaths due to multiple sclerosis. Separate models were conducted for male and female mortality, and the age range for both models was 28-days to 95+ years. Changes from GBD 2017 and the full list of covariates used in GBD 2019 are displayed below. Unadjusted death estimates were adjusted using CoD Correct to produce final estimates of YLLs.

#### Covariates used in Other Neurological Disorders mortality modelling

| Level | Covariate                                             | Direction |
|-------|-------------------------------------------------------|-----------|
| 1     | Mean total body mass index                            | +         |
|       | Mean serum total cholesterol (mmol/L)                 | +         |
|       | Mean systolic blood pressure (mm/Hg)                  | +         |
|       | Pigs per capita                                       | +         |
|       | Underweight proportion under 2 standard deviations    | +         |
|       | Red meat consumption adjusted                         | +         |
| 2     | Population density over 1000 per square kilometer pct | +         |
|       | Health care access and quality index                  | -         |
|       | Fruit consumption (grams per day adjusted)            | -         |
| 3     | Cumulative cigarettes (10 years)                      | +         |
|       | Cumulative cigarettes (5 years)                       | +         |
|       | Education (years per capita)                          | -         |
|       | Log-transformed LDI (per capita)                      | -         |
|       | Smoking prevalence                                    | +         |
|       | Socio-demographic Index                               | +         |

The following plots show the influence of each covariate on the four CODEm models (male global, male data rich, female global, and female data rich). A positive standardized beta (to the right) means that the covariate was associated with increased death. A negative standardized beta (to the left) means the covariate was associated with decreased death.

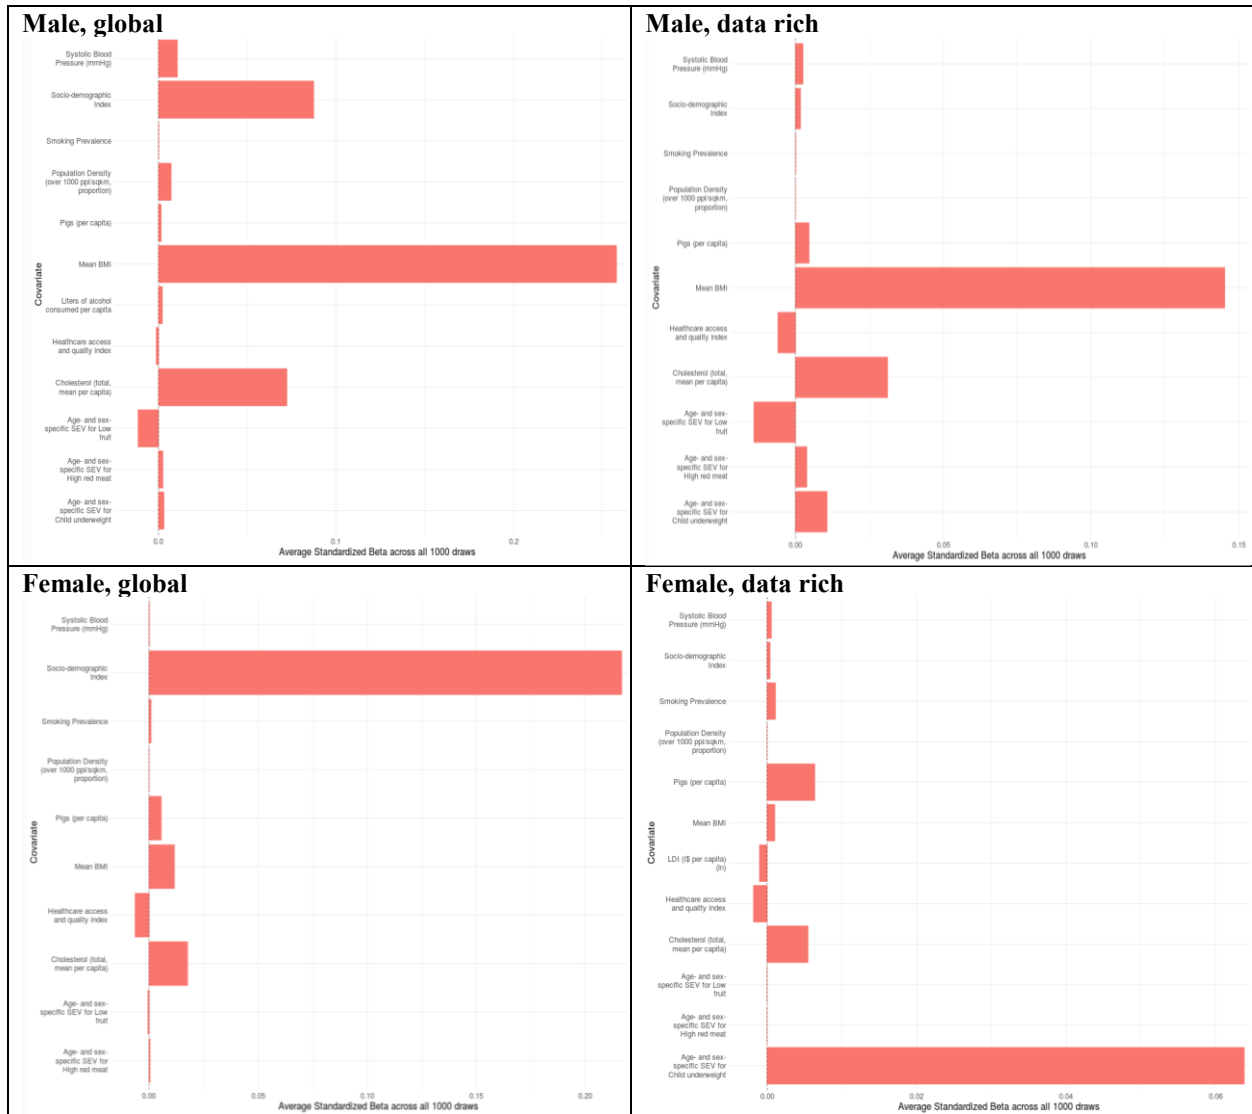

#### **4.13. Other neurological disorders (non-fatal modelling)**

In addition to the neurological disorders described above, there are many diverse types of neurological disorders with a range of severities and associated sequelae. Because these neurological disorders are diverse in their underlying causes and risk factors as well as in their associated health outcomes, modelling them together in a DisMod-MR model would not produce reliable estimates of prevalence or excess mortality. Instead, we calculated the YLDs caused by neurological disorders directly using a YLD/YLL ratio.

We calculated the ratio of YLDs to YLLs across the specified neurological disorders for which non-fatal outcomes were modelled, using YLL estimates from the GBD 2019 cause of death (CoD) analysis. We then multiplied this YLD/YLL ratio by the YLL estimates for other neurological disorders from the GBD 2019 CoD analysis, providing us with an estimate of the YLDs associated with other neurological disorders.

### 4.14. Stroke (fatal modelling)

#### 4.14.1. Ischaemic stroke

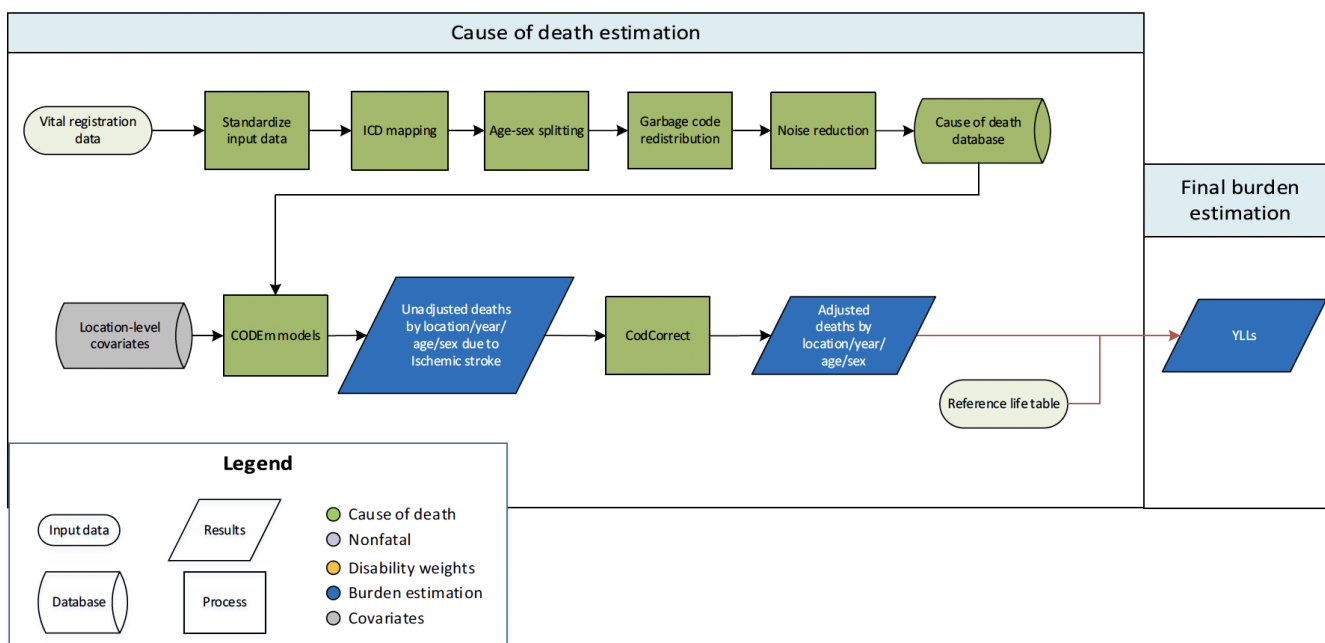

#### Input data

Vital registration data were used to model deaths from ischaemic stroke. We outliered ICD8 data points which were inconsistent with the rest of the data and created implausible time trends. We also outliered ICD10 data points in The Republic of Tajikistan due to unstable and implausible estimates in similar age groups.

#### Modelling strategy

We used a standard CODEm approach to model deaths from ischemic stroke. For GBD 2019, adjusted dietary covariates for consumption of fruits, omega-3 fatty acids, vegetables, nuts and seeds, and polyunsaturated fatty acids were replaced with the summary exposure value scalars for diet low in each of these factors. The direction for each dietary covariate was changed from -1 to 1 to as our *a priori* assumption is that low levels of intake of these dietary factors are associated with increasing mortality risk from ischaemic stroke. In addition, the dietary covariate for whole grains (kcal/capita, adjusted) and the socio-demographic index covariate were dropped as exploratory analyses indicated that the covariates were not predictive of the outcome. In addition, we changed the direction of the alcohol variable from 0 to 1 to reflect our *a priori* hypothesis about the expected direction of the association between this risk factor and mortality risk of ischaemic stroke. We also changed the level of the trans fatty acid covariate from 1 to 3. Besides these covariate changes, there are no other substantive changes from the approach used in GBD 2017.

Selected covariates for CODEm models, ischaemic stroke

| Covariate                                | Transformation | Level | Direction |
|------------------------------------------|----------------|-------|-----------|
| Summary exposure value, ischaemic stroke | None           | 1     | 1         |
| Cholesterol (total, mean per capita)     | None           | 1     | 1         |
| Smoking prevalence                       | None           | 1     | 1         |



|                                          |      |   |    |
|------------------------------------------|------|---|----|
| Systolic blood pressure (mmHg)           | None | 1 | 1  |
| Mean BMI                                 | None | 2 | 1  |
| Elevation over 1500m (proportion)        | None | 2 | -1 |
| Fasting plasma glucose                   | None | 2 | 1  |
| Outdoor pollution (PM <sub>2.5</sub> )   | None | 2 | 1  |
| Indoor air pollution                     | None | 2 | 1  |
| Healthcare access and quality index      | None | 2 | -1 |
| Lag distributed income per capita (I\$)  | Log  | 3 | -1 |
| Summary exposure value, omega-3          | None | 3 | 1  |
| Summary exposure value, fruits           | None | 3 | 1  |
| Summary exposure value, vegetables       | None | 3 | 1  |
| Summary exposure value, nuts and seeds   | None | 3 | 1  |
| Pulses/legumes (kcal/capita, unadjusted) | None | 3 | -1 |
| Summary exposure value PUFA adjusted     | None | 3 | 1  |
| Alcohol (litres per capita)              | None | 3 | 1  |
| Trans fatty acid                         | None | 3 | 1  |

**4.14.2. Intracerebral haemorrhage**

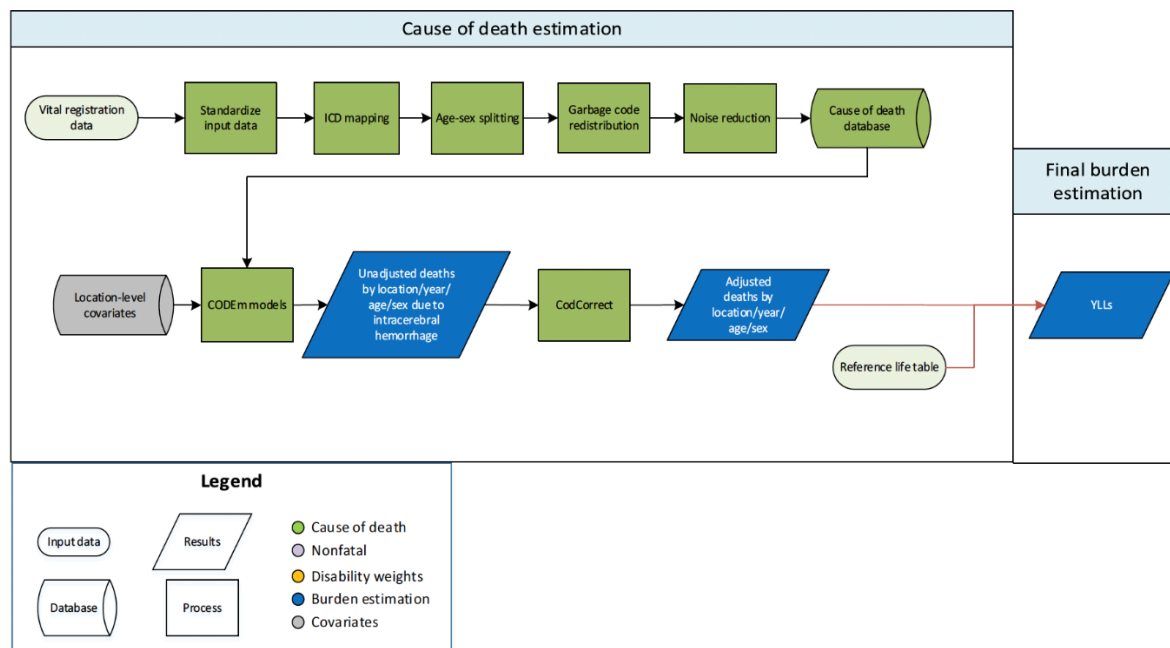

**Input data**

Vital registration data were used to model intracerebral haemorrhage. We outliered ICD8 data points which were inconsistent with the rest of the data and created implausible time trends. In addition, we outliered vital registration data points in certain countries in Latin American countries due to implausibly high values at the oldest age groups resulting in inconsistencies in time trends.

### Modelling strategy

We used a standard CODEm approach to model deaths from intracerebral haemorrhage. For GBD 2019, adjusted dietary covariates for consumption of fruits, omega-3 fatty acids, vegetables, nuts and seeds, and polyunsaturated fatty acids were replaced with the summary exposure value scalars for diet low in each of these factors. The direction for each dietary covariate was changed from -1 to 1 to as our *a priori* assumption is that low levels of intake of these dietary factors are associated with increasing mortality risk from intracerebral haemorrhage. In addition, the dietary covariate for whole grains (kcal/capita, adjusted) and the social demographic index covariate were dropped as exploratory analyses indicated that these covariates were not predictive of the mortality risk from intracerebral haemorrhage. We changed the direction of the covariate for alcohol from 0 to 1 due to our *a priori* hypothesis about the direction of the association for this covariate. We also changed the level of the cholesterol covariate from 1 to 3 and the direction from 0 to -1 to reflect the mixed and inconclusive evidence regarding cholesterol levels and risk of intracerebral haemorrhage. In addition, we changed the level of the trans fatty acid from covariate from 1 to 3 in accordance with the expected importance of this risk factor on mortality from intracerebral haemorrhage. Besides these covariate changes, there are no other substantive changes from the approach used in GBD 2017.

#### 4.14.3. Subarachnoid haemorrhage

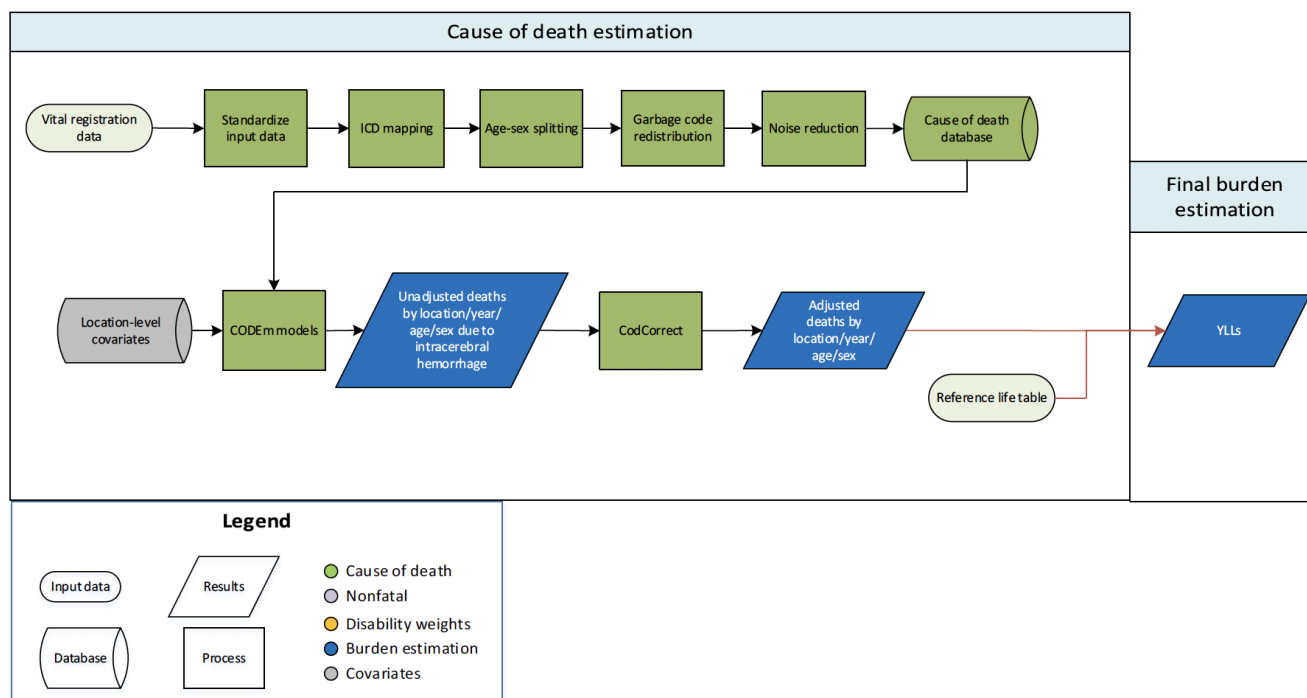

### Input data

Vital registration data were used to model subarachnoid haemorrhage. We outliered ICD8 datapoints which were inconsistent with the rest of the data and created implausible time trends. In addition, we outliered vital registration data in Tibet that was implausibly high for all years and age groups.

### Modelling strategy

We used a standard CODEm approach to model deaths from subarachnoid haemorrhage. The covariates chosen for inclusion in the ensemble modelling process are listed in the table below. For GBD 2019, we dropped the Socio-demographic Index covariate as exploratory analyses indicated that it was not predictive of the outcome. We also changed the direction of the alcohol covariate from 0 to 1 to reflect the expected direction of the association of this

risk factor with mortality risk. Apart from these changes to the covariates, there are no substantive changes from the approach used in GBD 2017.

#### ***Selected covariates for CODEm models, subarachnoid haemorrhage***

| Level | Covariate                               | Transformation | Direction |
|-------|-----------------------------------------|----------------|-----------|
| 1     | Smoking prevalence                      | None           | 1         |
| 1     | Systolic blood pressure (mmHg)          | None           | 1         |
| 2     | Healthcare access and quality index     | None           | -1        |
| 3     | Lag distributed income per capita (I\$) | Log            | -1        |
| 3     | Alcohol (litres per capita)             | None           | 1         |

#### ***4.14.4. Selected covariates for CODEm models, overall stroke and subtypes***

CODEm is an analytical tool which explores a large variety of possible models to estimate trends in causes of death. This tool explores a large variety of possible models to estimate trends in causes of death. Possible models are identified using a covariate selection algorithm that yields many plausible combinations of covariates, which are then run through four model classes. The model classes include mixed effects linear models and spatial-temporal Gaussian Process Regression models for cause fractions and death rates. All models for each cause of death are then assessed using out-of-sample predictive validity and combined into an ensemble with optimal out-of-sample predictive performance. Ensemble models for cause of death estimation outperform any single component model in tests of root mean square error, frequency of predicting correct temporal trends, and achieving 95% coverage of the prediction interval.<sup>9</sup>

| Covariate                                | Level | Direction, Stroke | Direction, Ischaemic stroke | Direction, Haemorrhagic stroke |
|------------------------------------------|-------|-------------------|-----------------------------|--------------------------------|
| Summary exposure variable                | 1     | +                 | +                           | +                              |
| Cholesterol (total, mean per capita)     | 1     | +                 | +                           | 0                              |
| Smoking prevalence                       | 1     | +                 | +                           | +                              |
| Systolic blood pressure (mmHg)           | 1     | +                 | +                           | +                              |
| Trans fatty acid                         | 1     | +                 | +                           | +                              |
| Mean BMI                                 | 2     | +                 | +                           | +                              |
| Elevation over 1500m (proportion)        | 2     | -                 | -                           | -                              |
| Fasting plasma glucose                   | 2     | +                 | +                           | +                              |
| Outdoor pollution (PM <sub>2.5</sub> )   | 2     | +                 | +                           | +                              |
| Indoor air pollution                     | 2     | +                 | +                           | +                              |
| Healthcare access and quality index      | 2     | -                 | -                           | -                              |
| Lag distributed income per capita (I\$)* | 3     | -                 | -                           | -                              |
| Socio-demographic Index                  | 3     | 0                 | 0                           | 0                              |
| Omega-3 (kcal/capita, adjusted) *        | 3     | -                 | -                           | -                              |
| Fruits (kcal/capita, adjusted)           | 3     | -                 | -                           | -                              |
| Vegetables (kcal/capita, adjusted)       | 3     | -                 | -                           | -                              |
| Nuts and seeds (kcal/capita, adjusted)   | 3     | -                 | -                           | -                              |
| Whole grains (kcal/capita, adjusted)     | 3     | -                 | -                           | -                              |
| Pulses/legumes (kcal/capita, adjusted)   | 3     | -                 | -                           | -                              |
| PUFA adjusted (percent)                  | 3     | -                 | -                           | -                              |

| Covariate                   | Level | Direction, Stroke | Direction, Ischaemic stroke | Direction, Haemorrhagic stroke |
|-----------------------------|-------|-------------------|-----------------------------|--------------------------------|
| Alcohol (litres per capita) | 3     | 0                 | 0                           | 0                              |

\*Variables were log-transformed

### DisMod covariates

Step 1:

| Cause                                | Variable name                                                    | Measure               | beta                  | Exponentiated beta |
|--------------------------------------|------------------------------------------------------------------|-----------------------|-----------------------|--------------------|
| Chronic ischaemic stroke             | Log-transformed SEV scalar: Isch Stroke                          | Prevalence            | 0.83 (0.75 – 1.03)    | 2.29 (2.12 – 2.80) |
| Chronic ischaemic stroke             | LDI (I\$ per capita)                                             | Excess mortality rate | -0.16 (-0.29 – -0.1)  | 0.85 (0.75 – 0.90) |
| Chronic haemorrhagic stroke          | Log-transformed SEV scalar: Hem Stroke                           | Prevalence            | 0.79 (0.75 – 0.92)    | 2.21 (2.12 – 2.50) |
| Chronic haemorrhagic stroke          | LDI (I\$ per capita)                                             | Excess mortality rate | -0.12 (-0.16 – -0.1)  | 0.89 (0.85 – 0.90) |
| First ever acute haemorrhagic stroke | Hospital data                                                    | Incidence             | 0.54 (0.54 – 0.54)    | 1.71 (1.71 – 1.72) |
| First ever acute haemorrhagic stroke | Any stroke                                                       | Incidence             | 1.27 (1.27 – 1.28)    | 3.57 (3.56 – 3.59) |
| First ever acute haemorrhagic stroke | First-ever acute stroke, ischaemic or haemorrhagic               | Incidence             | 0.52 (0.52 – 0.53)    | 1.69 (1.68 – 1.71) |
| First ever acute haemorrhagic stroke | Log-transformed age-standardized SEV scalar: haemorrhagic stroke | Incidence             | 0.77 (0.75 – 0.82)    | 2.17 (2.12 – 2.27) |
| First ever acute haemorrhagic stroke | Any stroke                                                       | Excess mortality rate | -0.48 (-0.66 – -0.32) | 0.62 (0.52 – 0.73) |
| First ever acute haemorrhagic stroke | First-ever acute stroke, ischaemic or haemorrhagic               | Excess mortality rate | -0.081 (-0.3 – 0.16)  | 0.62 (0.52 – 0.73) |
| First ever acute ischaemic stroke    | Hospital data                                                    | Incidence             | 0.38 (0.37 – 0.38)    | 1.46 (1.45 – 1.46) |
| First ever acute ischaemic stroke    | Any stroke                                                       | Incidence             | 0.31 (0.29 – 0.33)    | 1.37 (1.34 – 1.39) |
| First ever acute ischaemic stroke    | First-ever acute stroke, ischaemic or haemorrhagic               | Incidence             | 0.37 (0.36 – 0.38)    | 1.44 (1.43 – 1.46) |
| First ever acute ischaemic stroke    | Log-transformed age-standardized SEV scalar: ischaemic stroke    | Incidence             | 1.16 (1.09 – 1.22)    | 3.21 (2.99 – 3.39) |

Step 2:

| Cause                                 | Variable name                                   | Measure               | beta                 | Exponentiated beta |
|---------------------------------------|-------------------------------------------------|-----------------------|----------------------|--------------------|
| Chronic ischaemic stroke with CSMR    | Log-transformed SEV scalar: Ischaemic stroke    | Prevalence            | 0.89 (0.75 – 1.19)   | 2.44 (2.13 – 3.27) |
| Chronic ischaemic stroke with CSMR    | LDI (I\$ per capita)                            | Excess mortality rate | -0.49 (-0.5 – -0.46) | 0.61 (0.61 – 0.63) |
| Chronic haemorrhagic stroke with CSMR | Log-transformed SEV scalar: Haemorrhagic stroke | Prevalence            | 0.88 (0.75 – 1.15)   | 2.40 (2.13 – 3.17) |

| Cause                                          | Variable name                                                 | Measure               | beta                  | Exponentiated beta |
|------------------------------------------------|---------------------------------------------------------------|-----------------------|-----------------------|--------------------|
| Chronic haemorrhagic stroke with CSMR          | LDI (I\$ per capita)                                          | Excess mortality rate | -0.48 (-0.5 – -0.44)  | 0.62 (0.61 – 0.64) |
| First-ever acute haemorrhagic stroke with CSMR | Any stroke                                                    | Incidence             | 1.27 (1.27 – 1.29)    | 3.58 (3.56 – 3.62) |
| First-ever acute haemorrhagic stroke with CSMR | First-ever acute stroke, ischaemic or haemorrhagic            | Incidence             | 0.52 (0.52 – 0.54)    | 1.69 (1.68 – 1.71) |
| First-ever acute haemorrhagic stroke with CSMR | Log-transformed SEV scalar: Hem stroke                        | Incidence             | 1.11 (1.01 – 1.20)    | 3.03 (2.74 – 3.33) |
| First-ever acute haemorrhagic stroke with CSMR | Any stroke                                                    | Excess mortality rate | -0.37 (-0.49 – -0.27) | 0.69 (0.62 – 0.77) |
| First-ever acute haemorrhagic stroke with CSMR | First-ever acute stroke, ischaemic or haemorrhagic            | Excess mortality rate | 0.023 (-0.2 – 0.23)   | 1.02 (0.82 – 1.25) |
| First-ever acute ischaemic stroke with CSMR    | Any stroke                                                    | Incidence             | 0.32 (0.30 – 0.33)    | 1.38 (1.35 – 1.39) |
| First-ever acute ischaemic stroke with CSMR    | First-ever acute stroke, ischaemic or haemorrhagic            | Incidence             | 0.37 (0.36 – 0.38)    | 1.44 (1.43 – 1.46) |
| First-ever acute ischaemic stroke with CSMR    | Log-transformed age-standardized SEV scalar: Ischaemic stroke | Incidence             | 1.11 (1.05 – 1.18)    | 3.04 (2.86 – 3.26) |
| First-ever acute ischaemic stroke with CSMR    | Any stroke                                                    | Excess mortality rate | -0.34 (-0.45 – -0.24) | 0.71 (0.64 – 0.79) |
| First-ever acute ischaemic stroke with CSMR    | First-ever acute stroke, ischaemic or haemorrhagic            | Excess mortality rate | -0.69 (-0.82 – -0.56) | 0.51 (0.44 – 0.57) |

## Sequelae and disability weights for ischaemic stroke, intracerebral haemorrhage and subarachnoid haemorrhage

| Sequela                                    | Health state lay description                                                                                                                                                | Disability weight        |
|--------------------------------------------|-----------------------------------------------------------------------------------------------------------------------------------------------------------------------------|--------------------------|
| Asymptomatic chronic stroke                | -                                                                                                                                                                           | N/A                      |
| Acute and chronic stroke, severity level 1 | Has some difficulty in moving around and some weakness in one hand, but is able to walk without help                                                                        | 0.019<br>(0.01 – 0.032)  |
| Acute and chronic stroke, severity level 2 | Has some difficulty in moving around and in using the hands for lifting and holding things, dressing and grooming                                                           | 0.07<br>(0.046 – 0.099)  |
| Acute and chronic stroke, severity level 3 | Has some difficulty in moving around, in using the hands for lifting and holding things, dressing and grooming, and in speaking. The person is often forgetful and confused | 0.316<br>(0.205 – 0.438) |
| Acute and chronic stroke, severity level 4 | Is confined to bed or a wheelchair, has difficulty speaking and depends on others for feeding, toileting and dressing                                                       | 0.552<br>(0.376 – 0.707) |

| <b>Sequela</b>                             | <b>Health state lay description</b>                                                                                                                             | <b>Disability weight</b> |
|--------------------------------------------|-----------------------------------------------------------------------------------------------------------------------------------------------------------------|--------------------------|
| Acute and chronic stroke, severity level 5 | Is confined to bed or a wheelchair, depends on others for feeding, toileting and dressing, and has difficulty speaking, thinking clearly and remembering things | 0.588<br>(0.411 – 0.745) |

***ICD Codes used in fatal and non-fatal analysis***

**Fatal analysis**

|                         | <b>ICD10</b>                                                                        | <b>ICD9</b>                         |
|-------------------------|-------------------------------------------------------------------------------------|-------------------------------------|
| Cerebrovascular disease | G45-G46.8, I60-I63.9, I65-I66.9, I67.0-I67.3, I67.5-I67.6, I68.1-I68.2, I69.0-I69.3 | 430-435.9, 437.0-437.2, 437.5-437.8 |
| Ischaemic stroke        | G45-G46.8, I63-I63.9, I65-I66.9, I67.2-I67.3, I67.5-I67.6, I69.3                    | 433-435.9, 437.0-437.1, 437.5-437.8 |
| Haemorrhagic stroke     | I60-I62.9, I67.0-I67.1, I68.1- I68.2, I69.0-I69.2                                   | 430-432.9, 437.2                    |

**Nonfatal analysis**

|                         | <b>ICD10</b>                                                              | <b>ICD9</b>                         |
|-------------------------|---------------------------------------------------------------------------|-------------------------------------|
| Cerebrovascular disease | I60-I63.9, I65-I66.9, I67.0-I67.3, I67.5-I67.6, I68.1-I68.2, I69.0- I69.3 | 430-434.9, 437.0-437.2, 437.5-437.8 |
| Ischaemic stroke        | I63-I63.9, I65-I66.9, I67.2-I67.3, I67.5-I67.6, I69.3                     | 433-434.9, 437.0-437.1, 437.5-437.8 |
| Haemorrhagic stroke     | I60-I62.9, I67.0-I67.1, I68.1- I68.2, I69.0-I69.2                         | 430-432.9, 437.2                    |

## 5. Supplementary limitations

The GBD Study 2019, like any large-scale epidemiological study, is subject to several potential sources of bias. All possible biases related to data analyses were dealt with in the same way as in other GBD estimates. While the specific biases can vary depending on the disease, region, and data sources, here are some common types of biases that could potentially affect the estimates:

- Selection bias: This can occur if the data sources used in the study are not representative of the entire population. For example, if data is primarily collected from urban hospitals, this may not accurately reflect the disease burden in rural areas.
- Information bias: This can occur if there are inaccuracies in the data that is collected. This could be due to misdiagnosis, underreporting, or errors in data entry.
- Confounding bias: This occurs when the effect of one factor (such as a risk factor) on an outcome (such as disease incidence) is mixed with the effect of another factor.
- Bias in disease modelling: The GBD study uses complex statistical models to estimate disease burden. The assumptions made in these models can introduce bias.
- Bias due to missing data: Not all countries have comprehensive health data, and the methods used to estimate disease burden in these cases can introduce bias.
- Temporal bias: This can occur when the data used does not accurately reflect the current disease burden due to changes over time.
- Geographical bias: This can occur if the data sources used in the study do not equally represent all geographical areas.
- Bias in risk factor attribution: The GBD study estimates the disease burden attributable to various risk factors. Bias can be introduced in the process of attributing disease burden to these risk factors.
- Publication bias: This occurs when the published studies that are included in the analysis do not represent all relevant studies.
- Bias in disability weights: The GBD study uses disability weights to calculate years lived with disability (YLDs). Bias can be introduced in the process of assigning these weights.

It is important to note that the GBD study uses rigorous methods and multiple data sources to minimise these biases and provide the most accurate estimates possible. However, all epidemiological studies are subject to some degree of bias, and these should be considered when interpreting the results.

## 6. Confounding factors in context

- Selection bias: This occurs when the data used in the study is not representative of the entire population. For instance, if a study primarily uses data from urban hospitals, it may not accurately reflect the disease burden in rural areas. To mitigate this, GBD team strived to use a diverse range of data sources that cover different demographics and regions.
- Information bias: This happens when there are inaccuracies in the data collected due to factors like misdiagnosis, underreporting, or data entry errors. For all levels, GBD ensures rigorous data collection and validation processes to minimise this bias.
- Confounding bias: This arises when the effect of one factor on an outcome is mixed with the effect of another factor. GBD used different statistical methods to adjust for potential confounders to address this bias.
- Bias in disease modelling: The assumptions made in statistical models can introduce bias. GBD has assessed the impact of this bias through cross-validation or using different models and comparing the results.
- Bias due to missing data: In cases where comprehensive health data were not available for all countries, the methods used to estimate disease burden can introduce bias. Multiple imputation or other statistical techniques were used to handle missing data and to involve accurate and comprehensive assessments. GBD has used imputation techniques to consider missing data; conducted sensitivity analyses to assess how different approaches to handling missing data have impacted the results to assess robustness of the estimates; has considered the quality of available data sources for each country; and collaborated with countries to improve data reporting and fill gaps. This ongoing collaboration helps enhance the accuracy of estimates over time. By incorporating these elements, the GBD study aims to transparently communicate the level of missing data for each country, enabling users to interpret the results with a clear understanding of the data limitations.
- Temporal bias: This can occur when the data used does not accurately reflect the current disease burden due to changes over time. GBD could mitigate this bias through using the most recent data and accounting for trends over time.
- Geographical bias: If the data sources used in the study do not equally represent all geographical areas, this can introduce bias. Using a diverse range of data sources could help address this issue.
- Bias in risk factor attribution: Bias can be introduced in the process of attributing disease burden to various risk factors. Sensitivity analyses were used to assess the robustness of these attributions.
- Publication bias: This occurs when the published studies included in the analysis do not represent all relevant studies. A comprehensive literature search and the use of unpublished data in GBD 2019 study could help mitigate this bias.
- Bias in disability weights: Bias can be introduced in the process of assigning disability weights. GBD has used a wide range of resources for data and assigned these weights to all analyses.

It is important to note that while these biases can affect the results, we were aware of them and did our best to use rigorous methods and multiple data sources to provide the most accurate estimates possible. However, all epidemiological studies are subject to some degree of bias, and these should be considered when interpreting the results.



## Supplementary Results

### 1. All ages values

In North Africa and Middle East, the proportion of neurological DALYs (6.1% of global neurological DALYs; absolute numbers; Figure S4) was lower than in Southeast Asia, East Asia, and Oceania (35.4% of global neurological DALYs), Central Europe, Eastern Europe, and Central Asia (8.1%), high-income (13.6%), South Asia (19.1%), and in Sub-Saharan Africa (12.2%) regions and slightly higher than in Latin America and the Caribbean region (5.6%). In NAME, total neurological YLDs were 7.6 million (3.7–13.8; 12.2% of global neurological YLDs) and neurological YLLs were 9.9 million (8.1–12.7; 9.8% of global neurological YLLs) in 2019. Total deaths related to NCs were 4.7% of global neurological deaths, the number of new NCs was 7.6% of global neurological new events per year, and the number of prevalent cases with NCs was 7.8% of global NCs. Lebanon, Qatar, Kuwait, and Bahrain had the lowest rates of stroke DALYs (Figure 2).

**Figure S4. The proportions of disability-adjusted life years related to neurological conditions in A) North Africa and Middle East and B) the globe.**

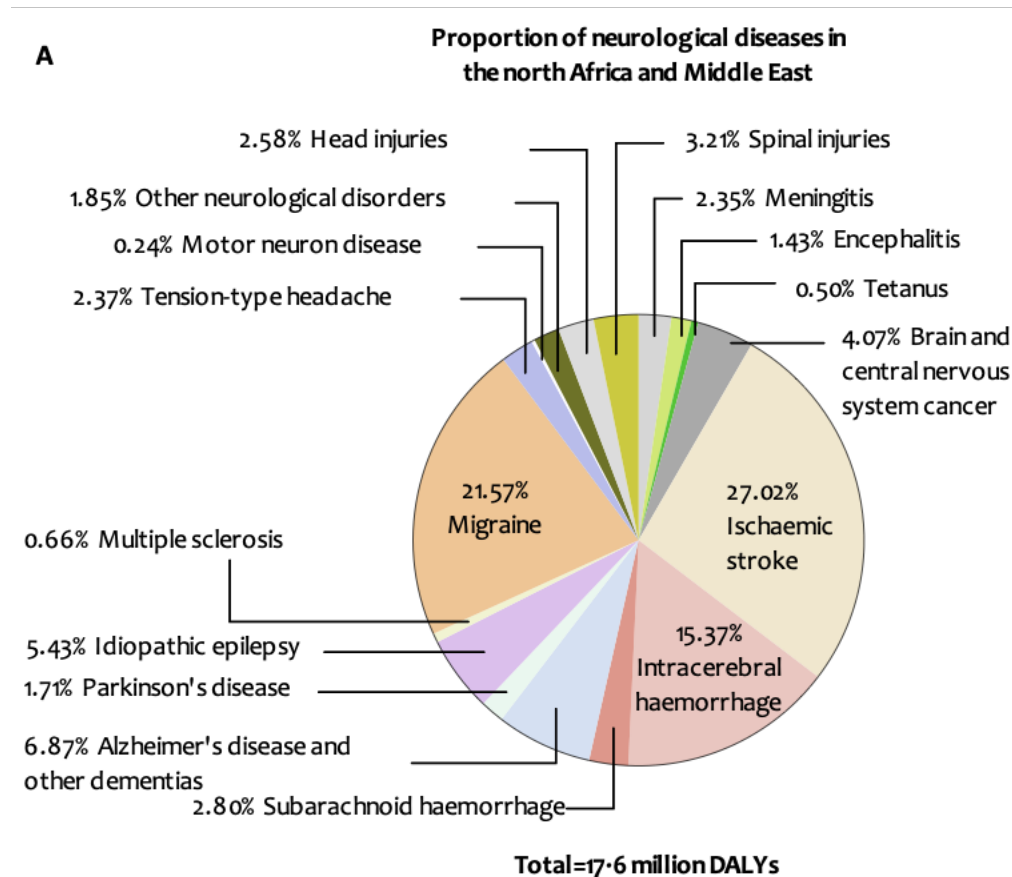

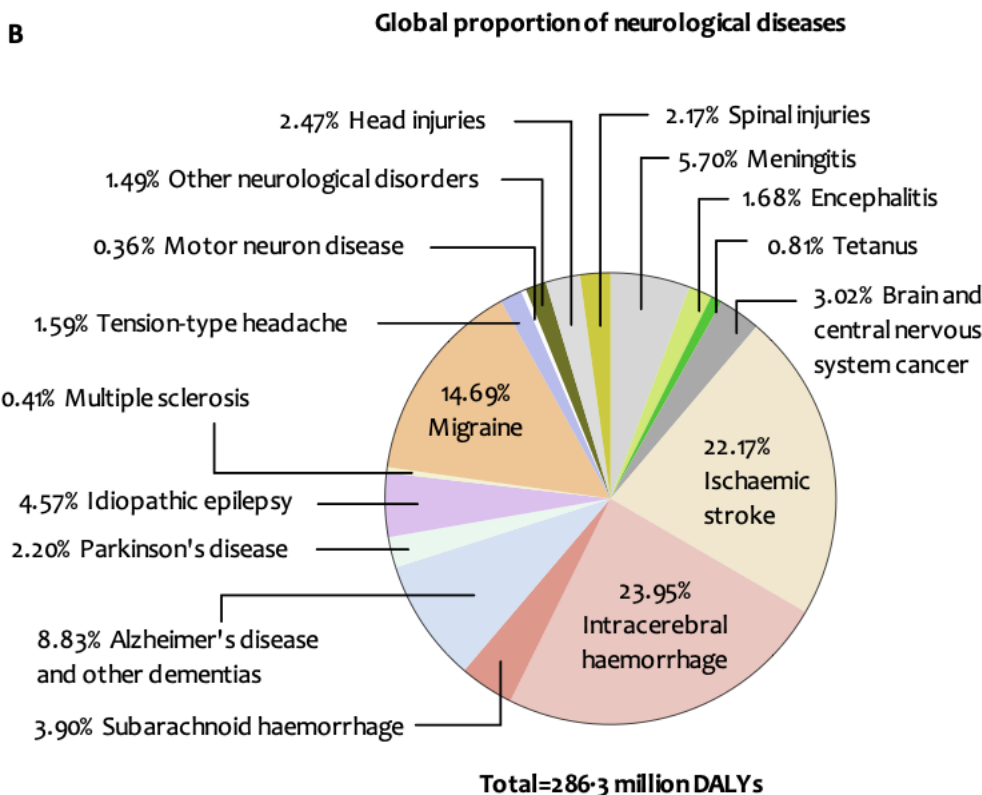

In 2019, among all NCs in NAME, stroke (7.9, 95% UI 7.1–8.9 million DALYs; 45.2% of all neurological DALYs), migraine (3.8, 0.6–8.7 million; 21.6%), and dementia (1.2, 0.5–2.7 million; 6.9%) were the leading causes of neurological DALYs with the highest absolute number. Likewise, stroke (312.2, 278.4–349.7 thousand deaths; 70.8%) and dementia (70.5, 17.2–185.8 thousand; 16.0%) were the leading causes of neurological deaths (overall, 86.8% of all neurological deaths). Heat maps in Figure S5 are showing the status of all-age DALYs of neurological conditions in the 21 countries of North Africa and Middle East in 2019.

**Figure S5. Heat maps of the burden of neurological conditions in all ages among 21 countries of North Africa and Middle East in 2019**

(A) stroke disability-adjusted life years (DALYs); (B) neurological disorders DALYs; (C) Alzheimer's disease and other dementias DALYs; (D) headache disorders DALYs; (E) brain and central nervous system DALYs; (F) meningitis DALYs; (G) encephalitis DALYs; (H) tetanus DALYs; (I) head injuries years lived with disability (YLDs); and (J) spinal injuries YLDs per 100,000 people. Abbreviations: DALYs, disability-adjusted life years; YLDs, years lived with disability; Neurological disorders include Alzheimer's disease and other dementias, Parkinson's disease, idiopathic epilepsy, multiple sclerosis, headache disorders, motor neuron disease, and other neurological disorders; Headache disorders include migraine and tension-type headache.

**A. Stroke**

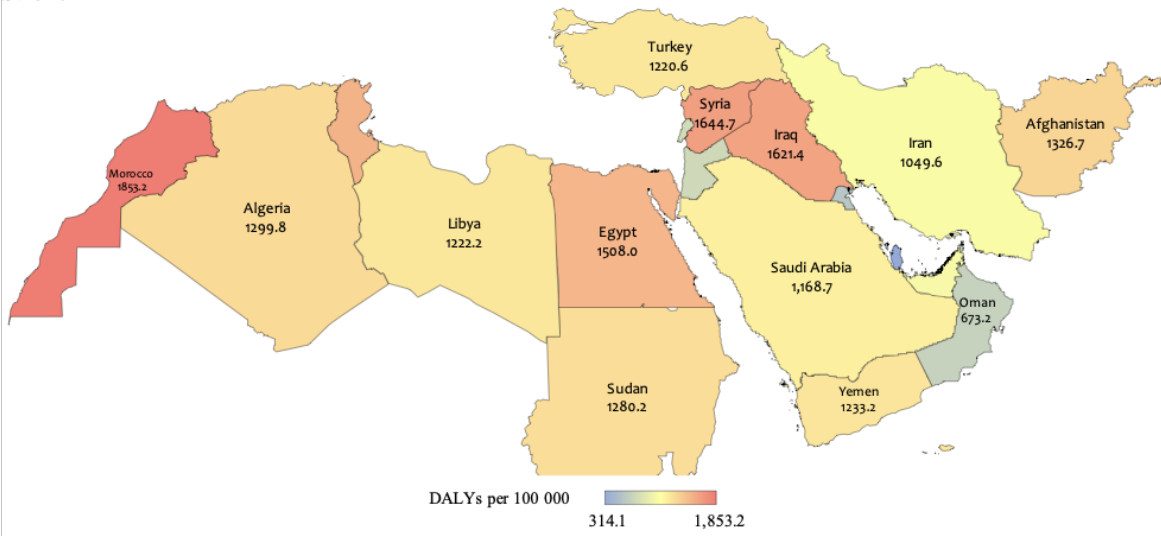

**B. Neurological disorders**

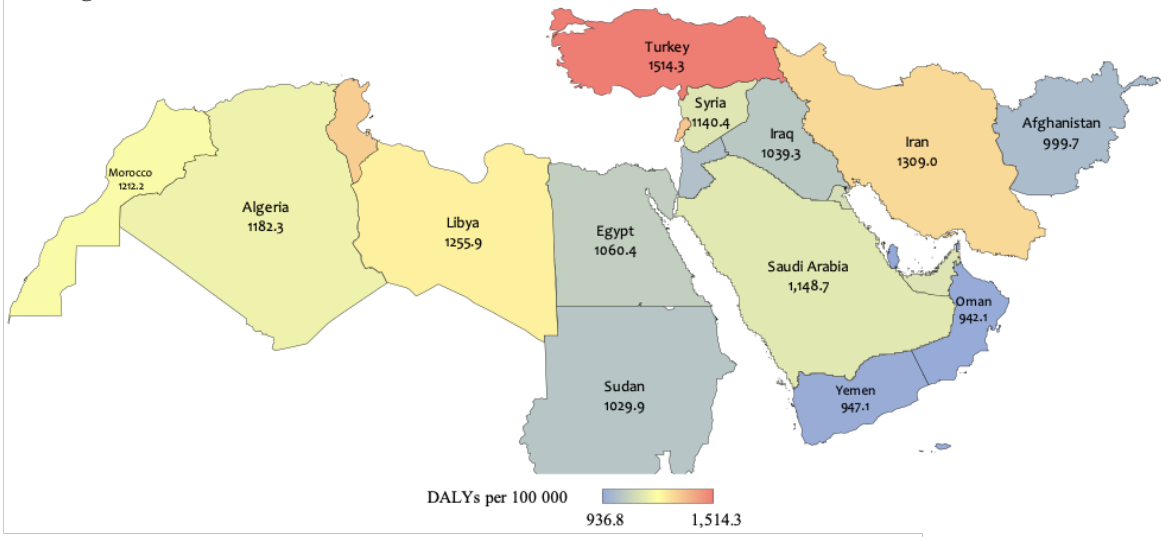

**C. Alzheimer's disease and other dementias**

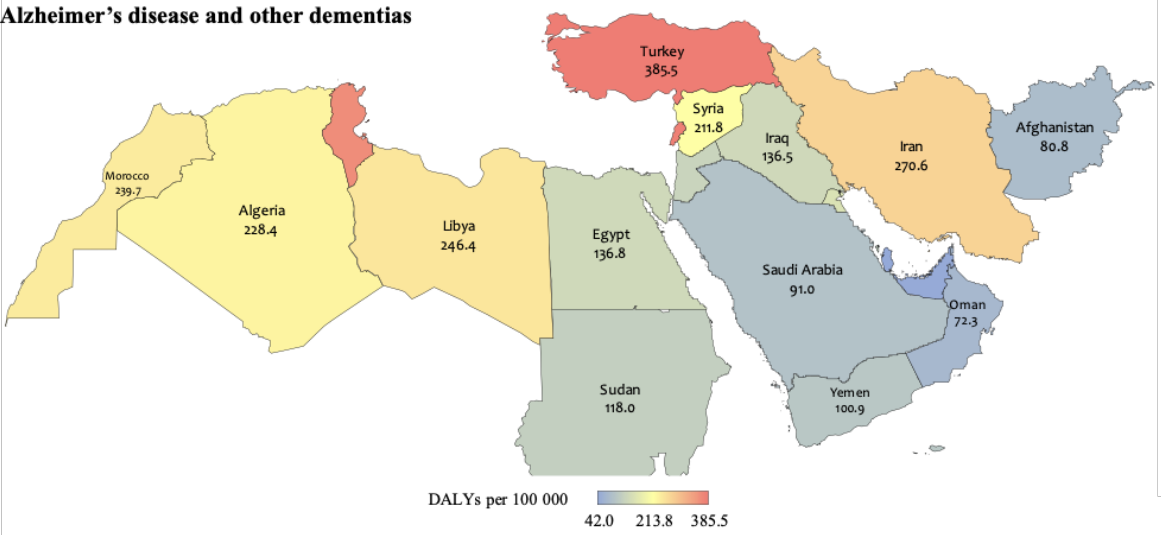

**D. Headache disorders**

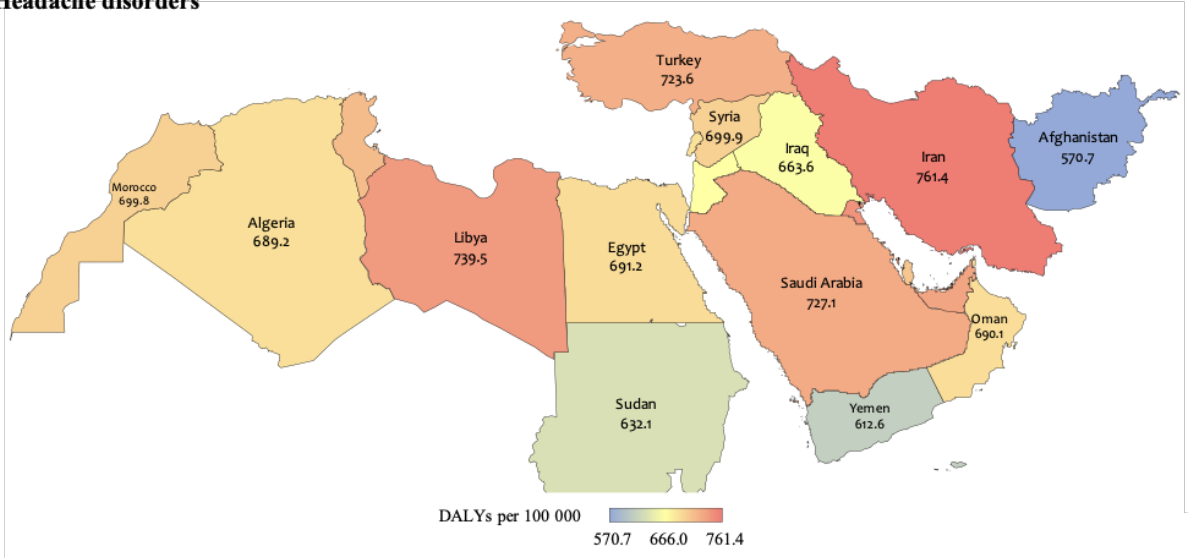

**E. Brain and central nervous system**

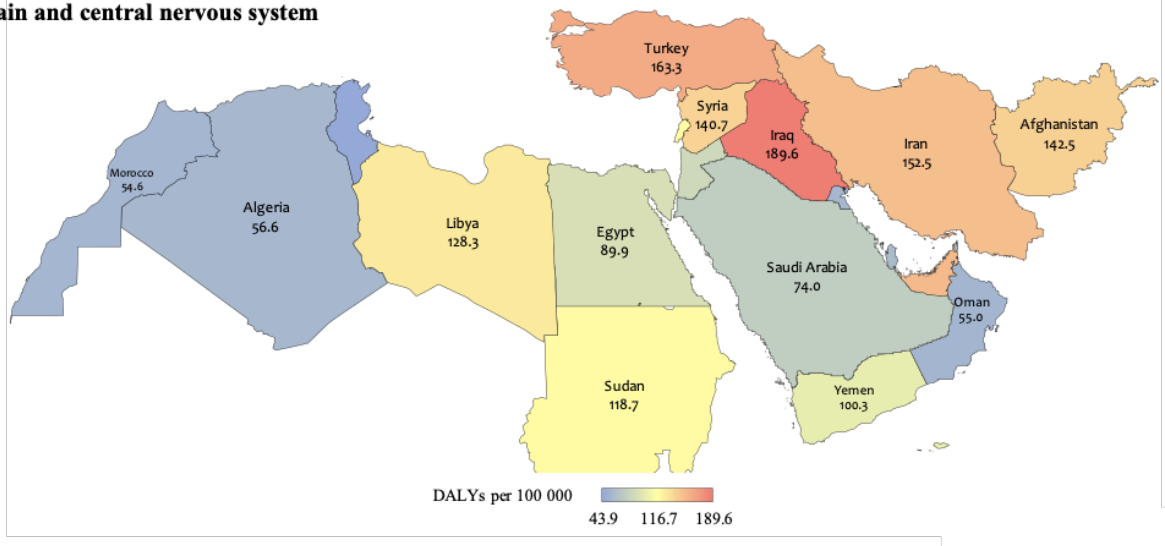

**F. Meningitis**

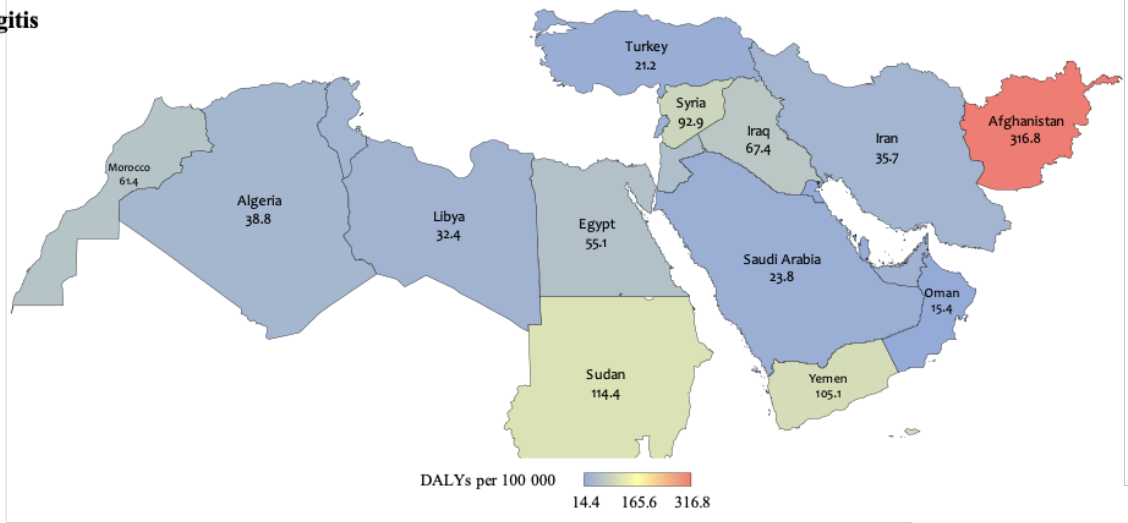

**G. Encephalitis**

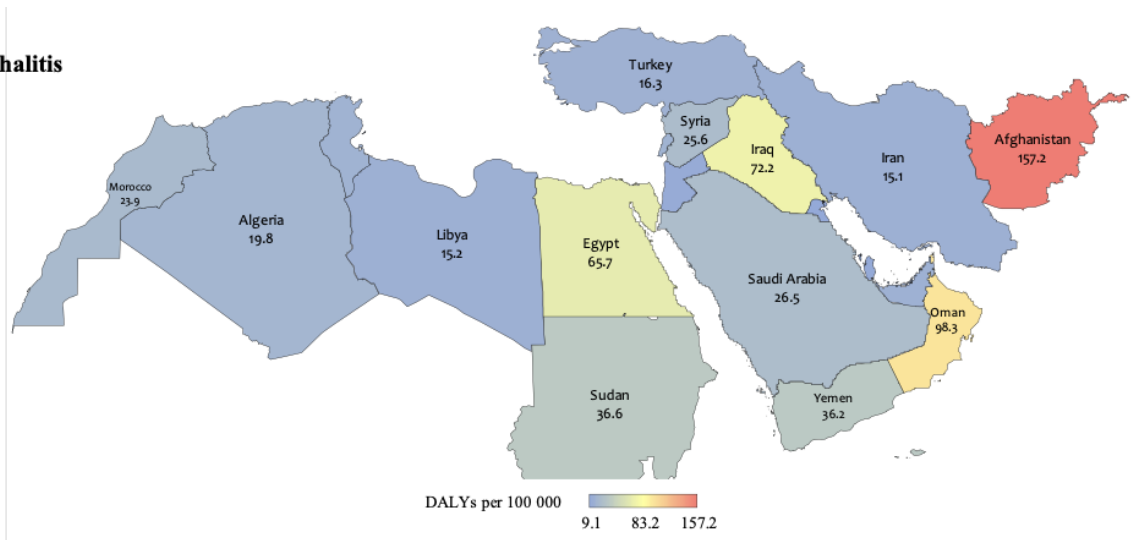

**H. Tetanus**

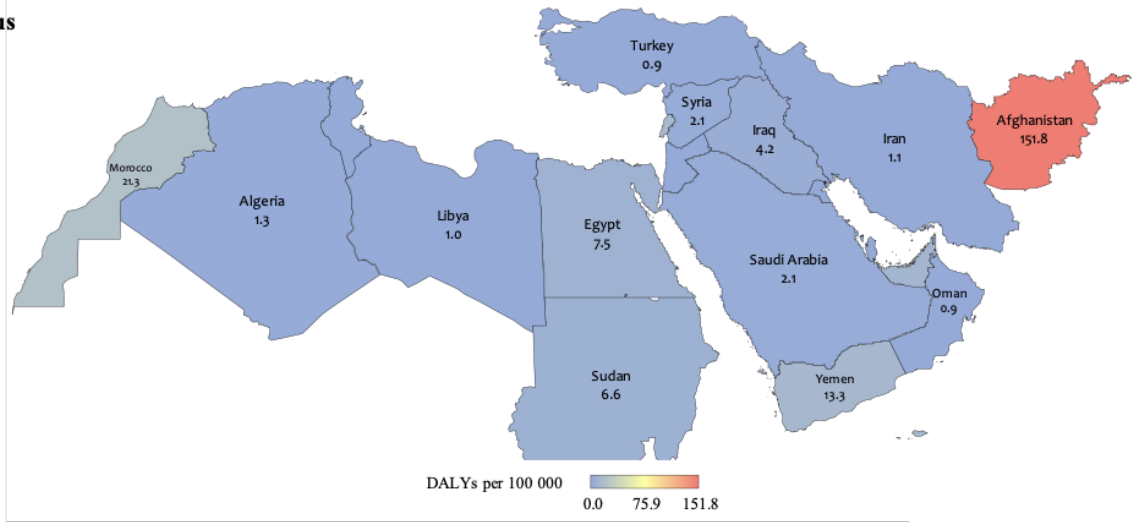

**I. Head injuries**

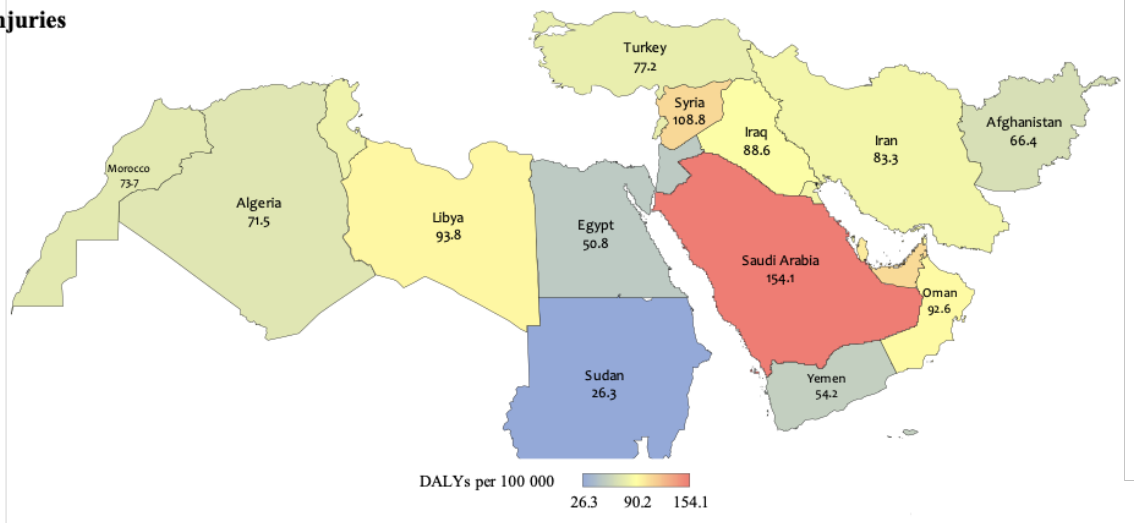

**J. Spinal injuries**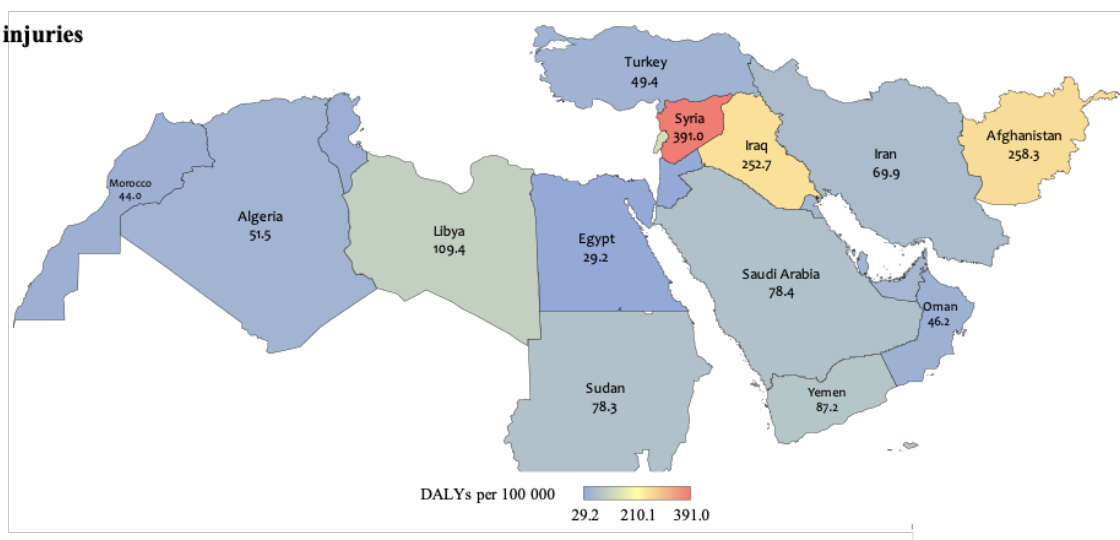

From 1990 to 2019, the absolute number of DALYs and deaths related to meningitis, tetanus, and subarachnoid haemorrhage decreased in NAME, but all other NCs almost doubled (Table S3; Figure S6). The highest increases in the number of deaths were related to dementias (1.9-time, 95% UI 1.7 to 2.5), Parkinson's disease (1.8-time, 1.5 to 2.3), multiple sclerosis (1.5-time, 0.8 to 2.5), and ischaemic stroke (1.4-time, 1.1 to 1.7; Table 1). The highest increases in the number of new cases during this period were related to Parkinson's disease, dementia, ischaemic stroke, and CNS cancer; on average with a 1.5 to 1.9 times increase. From 2010 to 2019 in particular, the number of new dementias and their burden doubled in the UAE, Qatar, Jordan, and Bahrain. The UAE and Qatar had the highest rises in the absolute number of DALYs, death, incidence, and prevalence related to almost all NCs (supplementary Table S3).

**Figure S6. Trends of the absolute number of disability-adjusted life years (DALYs) related to neurological conditions in North Africa and Middle East**

(A) meningitis; (B) encephalitis; (C) tetanus; (D) ischaemic stroke; (E) intracerebral haemorrhage; (F) subarachnoid haemorrhage; (G) Alzheimer's disease and other dementias; (H) migraine; (I) tension-type headache; (J) Parkinson's disease; (K) idiopathic epilepsy; (L) multiple sclerosis; (N) motor neuron disease; (O) other neurological disorders; and (P) brain and central nervous system cancer.

**Figure S6** Trends of the absolute number of disability-adjusted life years lost (DALYs) related to neurological conditions in North Africa and Middle East

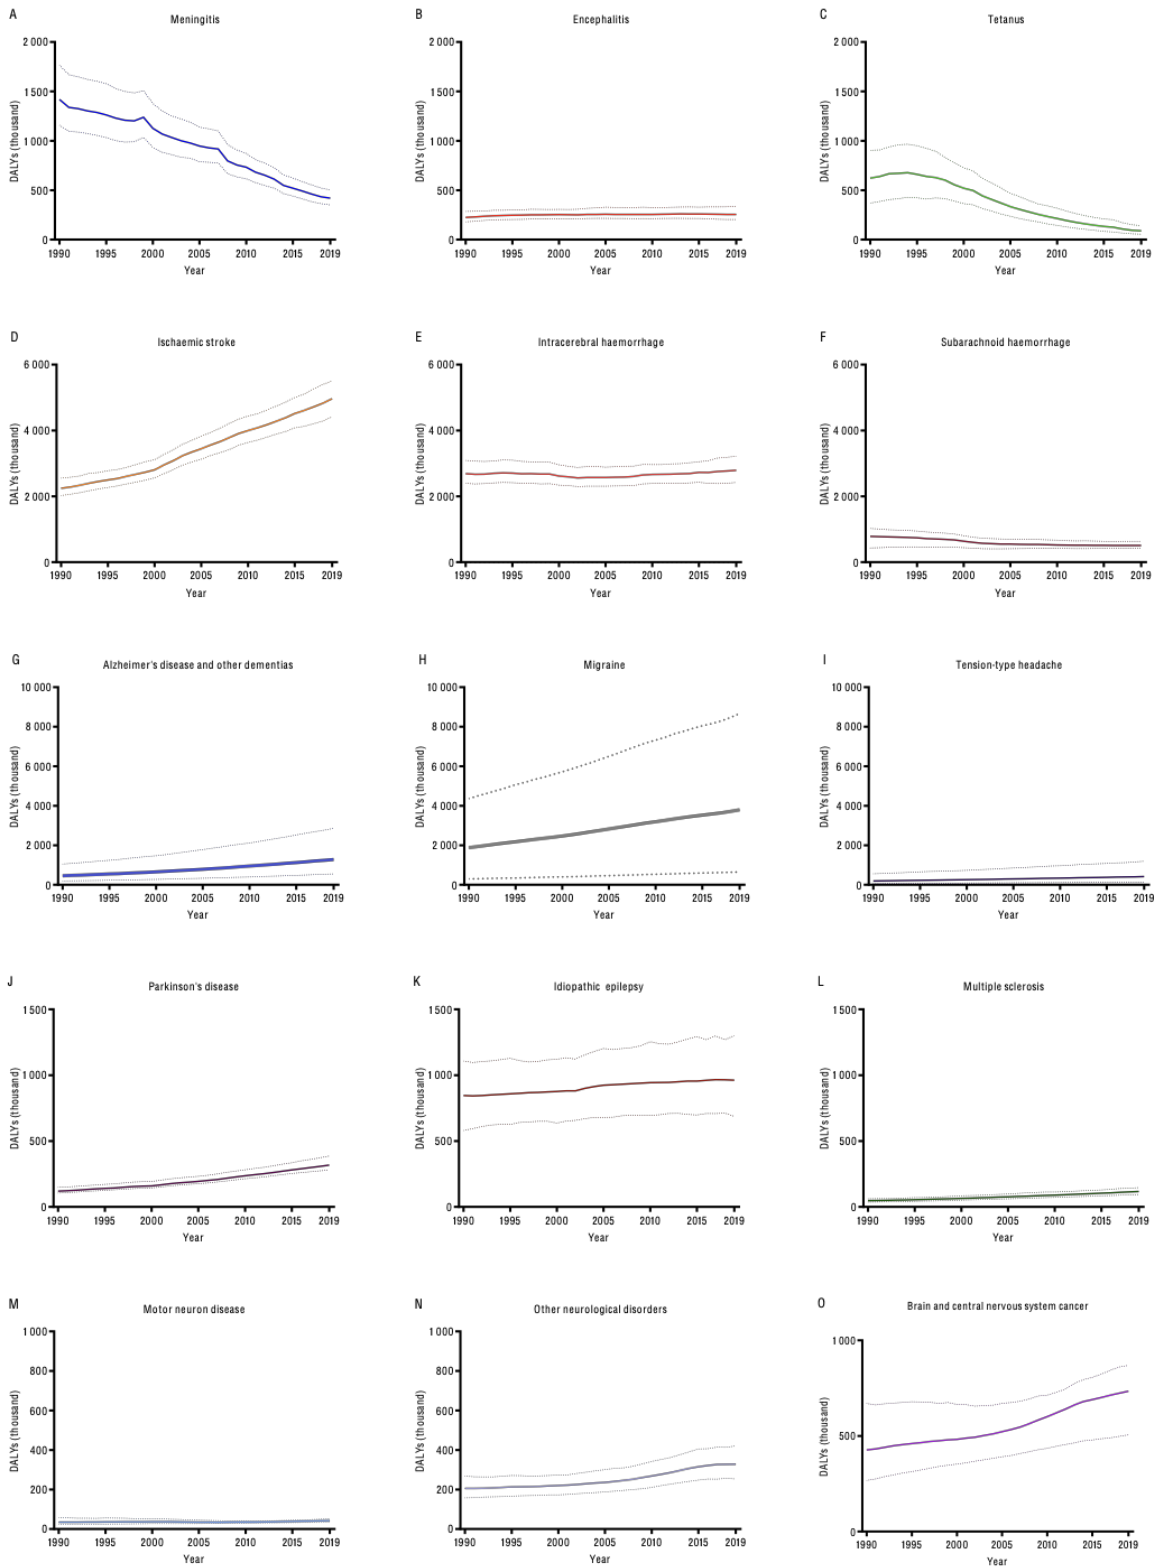

## 2. Age-standardised values

In NAME, the age-standardised rates of stroke DALYs per 100,000 (1826·2, 95% UI 1635·3–2026·2) were higher than HICs (653·2, 596·1–704·9), Latin America and Caribbean (1060·0, 976·7–1144·7), and South Asia (1702·6, 1510·9–1891·0 (Figure S7).

**Figure S7. Ranks of age-standardised neurological disability-adjusted life years (DALYs) rates in seven GBD super regions and four World Bank income levels in 2019.**

Ranks range from 1 (dark green) with the lowest rate to 12 (dark red) with the highest rate. Stroke includes ischaemic stroke, intracerebral haemorrhage, and subarachnoid haemorrhage; Neurological disorders include Alzheimer’s disease and other dementias, Parkinson’s disease, idiopathic epilepsy, multiple sclerosis, headache disorders, motor neuron disease, and other neurological disorders; Headache disorders include migraine and tension-type headache.

|                                                  | Stroke | Intracerebral haemorrhage | Subarachnoid haemorrhage | Alzheimer’s disease and other dementias | Neurological disorders | Parkinson’s disease | Idiopathic epilepsy | Headache disorders | Multiple sclerosis | Tension-type headache | Migraine | Motor neuron disease | Other neurological disorders | Brain and central nervous system cancer | Encephalitis | Meningitis | Tetanus |    |
|--------------------------------------------------|--------|---------------------------|--------------------------|-----------------------------------------|------------------------|---------------------|---------------------|--------------------|--------------------|-----------------------|----------|----------------------|------------------------------|-----------------------------------------|--------------|------------|---------|----|
| World Bank Low Income                            | 1      | 6                         | 1                        | 8                                       | 9                      | 5                   | 7                   | 2                  | 10                 | 12                    | 12       | 11                   | 11                           | 6                                       | 11           | 2          | 5       | 2  |
| Southeast Asia, East Asia, and Oceania           | 2      | 3                         | 3                        | 5                                       | 12                     | 2                   | 2                   | 12                 | 12                 | 10                    | 10       | 12                   | 8                            | 12                                      | 7            | 7          | 6       | 7  |
| Central Europe, Eastern Europe, and Central Asia | 3      | 1                         | 8                        | 1                                       | 5                      | 8                   | 12                  | 7                  | 3                  | 4                     | 6        | 1                    | 5                            | 5                                       | 1            | 10         | 4       | 11 |
| Sub-Saharan Africa                               | 4      | 8                         | 2                        | 12                                      | 6                      | 6                   | 10                  | 1                  | 11                 | 11                    | 11       | 6                    | 12                           | 2                                       | 12           | 1          | 9       | 1  |
| World Bank Lower Middle Income                   | 5      | 5                         | 4                        | 4                                       | 8                      | 11                  | 3                   | 5                  | 7                  | 6                     | 5        | 7                    | 10                           | 9                                       | 9            | 3          | 2       | 4  |
| World Bank Upper Middle Income                   | 6      | 4                         | 6                        | 7                                       | 10                     | 3                   | 6                   | 9                  | 9                  | 9                     | 9        | 9                    | 6                            | 10                                      | 3            | 9          | 10      | 9  |
| North Africa and Middle East                     | 7      | 2                         | 9                        | 11                                      | 1                      | 1                   | 1                   | 8                  | 4                  | 1                     | 1        | 4                    | 7                            | 8                                       | 2            | 6          | 7       | 6  |
| Global                                           | 8      | 7                         | 7                        | 6                                       | 7                      | 7                   | 5                   | 6                  | 5                  | 7                     | 8        | 5                    | 4                            | 7                                       | 8            | 4          | 3       | 5  |
| South Asia                                       | 9      | 9                         | 5                        | 2                                       | 11                     | 12                  | 4                   | 4                  | 8                  | 8                     | 7        | 10                   | 9                            | 11                                      | 10           | 5          | 1       | 3  |
| Latin America and Caribbean                      | 10     | 10                        | 10                       | 3                                       | 2                      | 4                   | 11                  | 3                  | 6                  | 5                     | 4        | 8                    | 3                            | 1                                       | 6            | 8          | 8       | 8  |
| World Bank High Income                           | 11     | 11                        | 11                       | 10                                      | 3                      | 9                   | 8                   | 10                 | 2                  | 3                     | 3        | 3                    | 2                            | 4                                       | 4            | 12         | 11      | 10 |
| High-income                                      | 12     | 12                        | 12                       | 9                                       | 4                      | 10                  | 9                   | 11                 | 1                  | 2                     | 2        | 2                    | 1                            | 3                                       | 5            | 11         | 12      | 12 |

Trends of neurological DALYs are reported in the main text and illustrated in Figure S8.

**Figure S8. Trends of the age-standardised rate of disability-adjusted life years (DALYs) related to neurological conditions in North Africa and Middle East.**

(A) meningitis; (B) encephalitis; (C) tetanus; (D) ischaemic stroke; (E) intracerebral haemorrhage; (F) subarachnoid haemorrhage; (G) Alzheimer’s disease and other dementias; (H) migraine; (I) tension-type headache; (J) Parkinson’s disease; (K) idiopathic epilepsy; (L) multiple sclerosis; (N) motor neuron disease; (O) other neurological disorders; and (P) brain and central nervous system cancer.



**Figure S8** Trends of the age-standardised rate of disability-adjusted life years (DALYs) related to neurological conditions in North Africa and Middle East

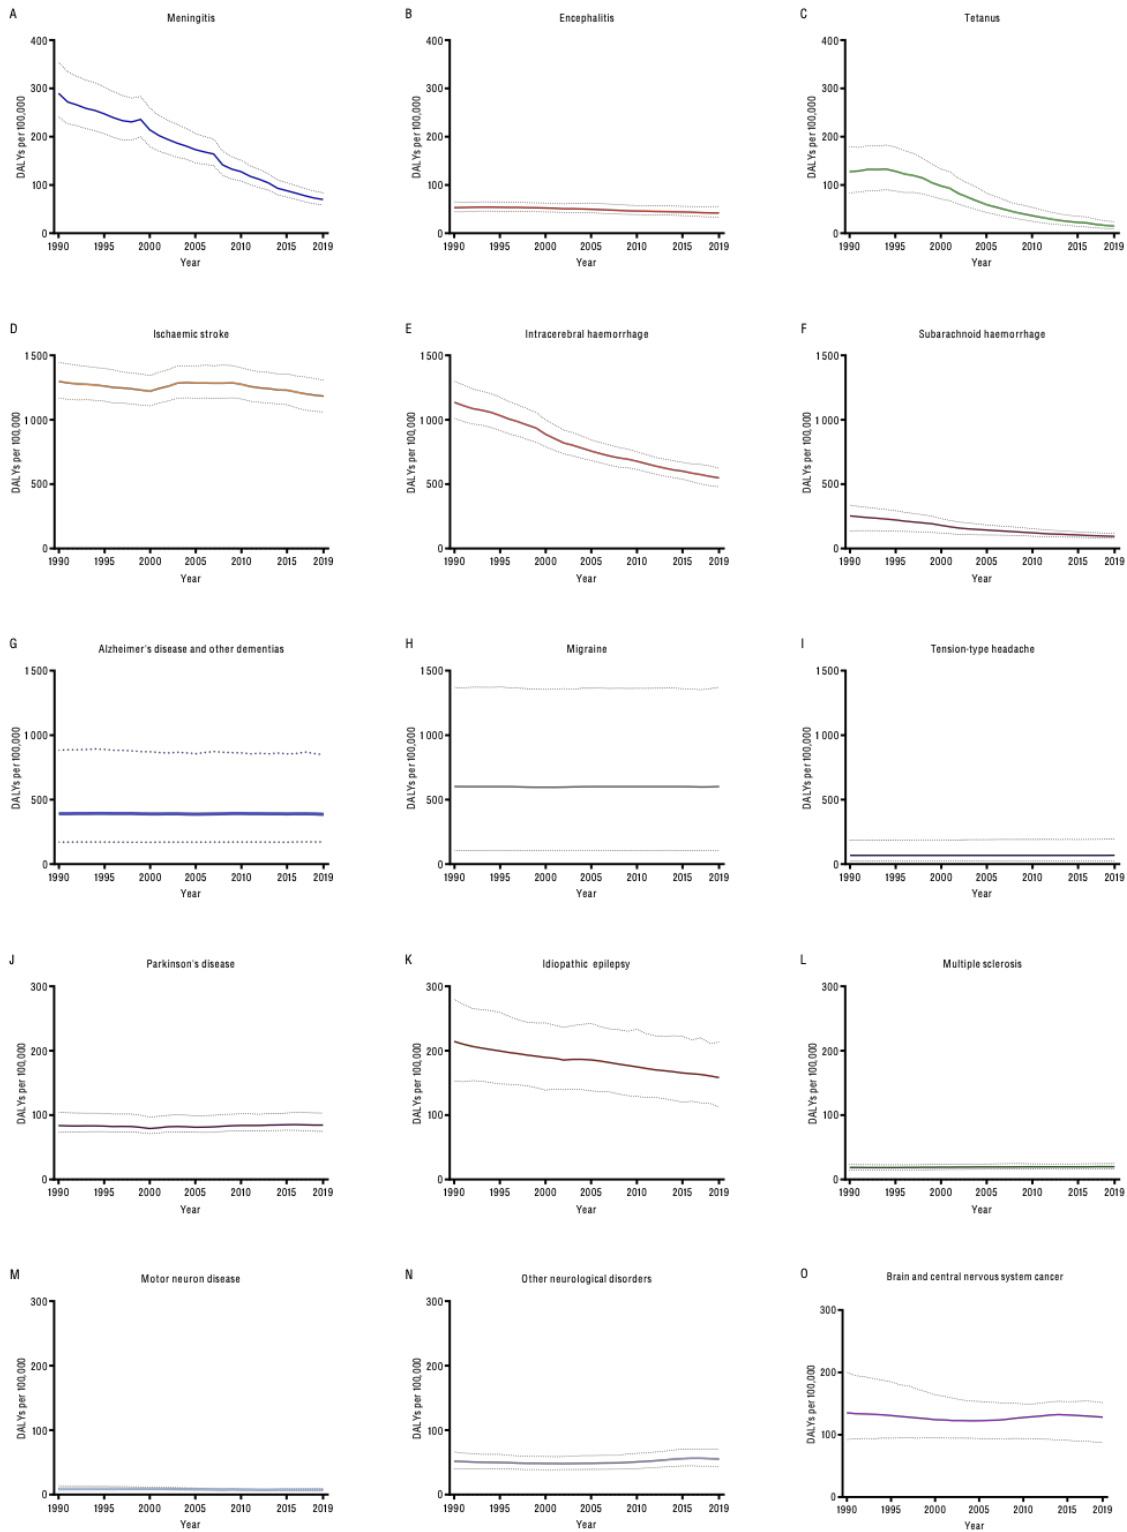

From 1990 to 2019, in NAME, the highest declines in the age-standardised death rate were related to tetanus (-88.9%, -93.3% to -80.6%), meningitis (-71.6%, -77.1% to -64.9%), subarachnoid haemorrhage (-59.0%, -70.7% to -31.6%), and idiopathic epilepsy (-33.4%, -46.2% to 2.1%; Table 1). Parkinson's disease (12.7%, 9.9% to 15.7%), ischaemic stroke (8.8%, 6.3% to 11.4%), and multiple sclerosis (5.5%, 4.0% to 6.8%) had the most substantial rises in age-standardised incidence rate from 1990 to 2019. We observed statistically significant rises in the age-standardised incidence rates in a) Saudi Arabia for CNS cancer; b) Saudi Arabia, Egypt, and Libya for all-type stroke; c) Egypt, Libya, Sudan, Saudi Arabia, Afghanistan, Yemen, Tunisia, Morocco, and Lebanon for ischaemic stroke; d) Oman, Saudi Arabia, Qatar, Morocco, Türkiye, the UAE, Iran, Bahrain, Tunisia, Egypt, Libya, the UAE, and the Syrian Arab Republic for Parkinson's disease; e) all the countries of the region except for Iran, the UAE, Jordan, and Türkiye for multiple sclerosis; f) Iran for headache disorders; and g) the UAE, Türkiye, Bahrain, Iraq, and Iran for motor neuron disease (supplementary Figure S9 and Table S4).

**Figure S9. Ranks of age-standardised neurological disability-adjusted life years (DALYs) rates in North Africa and Middle East countries compared with other regions in the world in 2019.**

Ranks range from 1 (dark red) with the highest rate to 18 (dark green) with the lowest rate. Stroke includes ischaemic stroke, haemorrhagic stroke, and subarachnoid haemorrhage; Neurological disorders include Alzheimer's disease and other dementias, Parkinson's disease, idiopathic epilepsy, multiple sclerosis, headache disorders, motor neuron disease, and other neurological disorders; Headache disorders include migraine and tension-type headache.

|                                         | Central Europe, Eastern Europe, and Central Asia | Southeast Asia, East Asia, and Oceania | Global | Latin America and Central Asia | High Income | World Bank Upper Middle Income | World Bank Lower Middle Income | World Bank Low Income | North Africa and Middle East | Algeria | Bahrain | Egypt | Iran | Iraq | Jordan | Kuwait | Lebanon | Libya | Morocco | Palestine | Oman | Qatar | Saudi Arabia | Syrian Arab Republic | United Arab Emirates | Tunisia | Turkey | Afghanistan | Yemen | Sudan |    |    |    |    |
|-----------------------------------------|--------------------------------------------------|----------------------------------------|--------|--------------------------------|-------------|--------------------------------|--------------------------------|-----------------------|------------------------------|---------|---------|-------|------|------|--------|--------|---------|-------|---------|-----------|------|-------|--------------|----------------------|----------------------|---------|--------|-------------|-------|-------|----|----|----|----|
| Stroke                                  | 1                                                | 1                                      | 1      | 3                              | 2           | 1                              | 1                              | 2                     | 1                            | 1       | 1       | 1     | 1    | 1    | 2      | 1      | 2       | 2     | 1       | 1         | 1    | 1     | 2            | 1                    | 1                    | 1       | 2      | 1           | 1     | 1     | 1  |    |    |    |
| Neurological disorders                  | 2                                                | 4                                      | 3      | 1                              | 1           | 2                              | 3                              | 1                     | 2                            | 2       | 3       | 2     | 2    | 1    | 3      | 1      | 3       | 2     | 1       | 1         | 2    | 3     | 3            | 2                    | 1                    | 2       | 2      | 1           | 2     | 3     | 3  | 3  |    |    |
| Intracerebral haemorrhage               | 3                                                | 2                                      | 4      | 7                              | 6           | 3                              | 2                              | 7                     | 4                            | 3       | 2       | 6     | 6    | 7    | 5      | 7      | 4       | 7     | 7       | 8         | 7    | 6     | 6            | 6                    | 7                    | 4       | 4      | 7           | 6     | 6     | 4  | 4  | 4  |    |
| Ischaemic stroke                        | 4                                                | 3                                      | 2      | 5                              | 5           | 4                              | 5                              | 5                     | 3                            | 4       | 4       | 3     | 3    | 4    | 2      | 3      | 2       | 3     | 3       | 5         | 3    | 2     | 2            | 3                    | 4                    | 3       | 3      | 3           | 3     | 2     | 2  | 2  |    |    |
| Headache disorders                      | 5                                                | 5                                      | 5      | 2                              | 3           | 5                              | 6                              | 3                     | 5                            | 5       | 6       | 4     | 4    | 3    | 4      | 4      | 5       | 4     | 4       | 3         | 4    | 4     | 4            | 4                    | 3                    | 5       | 5      | 4           | 4     | 4     | 5  | 5  | 5  |    |
| Migraine                                | 6                                                | 6                                      | 6      | 4                              | 4           | 6                              | 7                              | 4                     | 6                            | 6       | 7       | 5     | 5    | 5    | 6      | 5      | 6       | 5     | 4       | 5         | 5    | 5     | 5            | 5                    | 6                    | 6       | 5      | 5           | 5     | 6     | 6  | 6  | 6  |    |
| Alzheimer's disease and other dementias | 7                                                | 7                                      | 7      | 6                              | 7           | 7                              | 8                              | 6                     | 7                            | 7       | 8       | 7     | 7    | 6    | 7      | 6      | 6       | 6     | 6       | 7         | 7    | 7     | 6            | 7                    | 7                    | 7       | 7      | 7           | 7     | 7     | 7  | 7  | 7  |    |
| Meningitis                              | 8                                                | 12                                     | 15     | 16                             | 13          | 8                              | 4                              | 16                    | 14                           | 8       | 5       | 12    | 14   | 14   | 14     | 14     | 13      | 12    | 14      | 13        | 14   | 11    | 14           | 15                   | 14                   | 15      | 11     | 14          | 15    | 15    | 11 | 8  | 11 |    |
| Idiopathic epilepsy                     | 9                                                | 10                                     | 9      | 9                              | 8           | 9                              | 9                              | 9                     | 8                            | 9       | 9       | 8     | 8    | 8    | 9      | 9      | 8       | 8     | 7       | 8         | 8    | 9     | 10           | 9                    | 8                    | 10      | 8      | 8           | 8     | 8     | 9  | 10 | 8  |    |
| Subarachnoid haemorrhage                | 10                                               | 8                                      | 8      | 10                             | 9           | 11                             | 10                             | 10                    | 9                            | 10      | 10      | 10    | 10   | 13   | 8      | 12     | 11      | 14    | 13      | 14        | 11   | 9     | 12           | 11                   | 11                   | 13      | 9      | 11          | 10    | 13    | 8  | 9  | 10 |    |
| Brain and central nervous system cancer | 11                                               | 9                                      | 10     | 8                              | 10          | 13                             | 14                             | 8                     | 10                           | 12      | 13      | 9     | 12   | 10   | 10     | 8      | 8       | 9     | 9       | 9         | 13   | 8     | 12           | 10                   | 10                   | 8       | 13     | 9           | 9     | 10    | 11 | 9  |    |    |
| Parkinson's disease                     | 12                                               | 11                                     | 12     | 11                             | 11          | 12                             | 12                             | 11                    | 11                           | 13      | 12      | 11    | 9    | 9    | 11     | 11     | 10      | 10    | 11      | 10        | 10   | 10    | 8            | 8                    | 9                    | 12      | 9      | 12          | 10    | 12    | 14 | 12 |    |    |
| Encephalitis                            | 13                                               | 14                                     | 14     | 17                             | 15          | 10                             | 16                             | 17                    | 15                           | 11      | 16      | 15    | 16   | 16   | 13     | 16     | 12      | 16    | 16      | 16        | 16   | 15    | 16           | 9                    | 16                   | 14      | 15     | 16          | 17    | 17    | 15 | 12 | 15 |    |
| Tension-type headache                   | 14                                               | 13                                     | 11     | 12                             | 14          | 14                             | 15                             | 12                    | 14                           | 15      | 13      | 11    | 12   | 12   | 10     | 14     | 11      | 10    | 11      | 12        | 12   | 11    | 13           | 12                   | 11                   | 13      | 10     | 13          | 12    | 13    | 15 | 13 |    |    |
| Other neurological disorders            | 15                                               | 15                                     | 13     | 13                             | 12          | 16                             | 13                             | 13                    | 13                           | 15      | 14      | 14    | 13   | 11   | 15     | 13     | 15      | 13    | 12      | 12        | 13   | 14    | 13           | 14                   | 13                   | 12      | 14     | 12          | 11    | 11    | 14 | 16 | 14 |    |
| Tetanus                                 | 16                                               | 16                                     | 18     | 18                             | 18          | 15                             | 10                             | 18                    | 18                           | 16      | 11      | 17    | 18   | 18   | 18     | 18     | 17      | 18    | 18      | 17        | 18   | 16    | 18           | 18                   | 18                   | 18      | 18     | 18          | 18    | 18    | 14 | 17 | 13 | 17 |
| Multiple sclerosis                      | 17                                               | 18                                     | 16     | 15                             | 17          | 17                             | 17                             | 14                    | 17                           | 17      | 16      | 15    | 15   | 16   | 15     | 16     | 15      | 15    | 15      | 15        | 17   | 15    | 16           | 15                   | 16                   | 16      | 15     | 16          | 16    | 16    | 17 | 16 | 16 |    |
| Motor neuron disease                    | 18                                               | 17                                     | 17     | 14                             | 16          | 18                             | 18                             | 15                    | 16                           | 18      | 18      | 18    | 17   | 17   | 17     | 17     | 18      | 17    | 17      | 18        | 17   | 18    | 17           | 17                   | 17                   | 17      | 17     | 17          | 17    | 14    | 18 | 18 | 18 | 18 |

From 1990 to 2019, in NAME, the age-standardised rates of YLDs related to head injuries increased (1.9%, -3.5% to 5.4%) and spinal injuries decreased (-5.4%, -27.6% to 12.3%), both non-statistically significantly. Countries with a statistically significant rise in the rate of YLDs related to head injuries were the Syrian Arab Republic (107.7%, 51.8% to 211.9%), Saudi Arabia, Türkiye, Yemen, Palestine, and Libya (9.9%, 3.2% to 18.6%). Likewise, those with a significant rise in the rate of YLDs related to spinal injuries were the Syrian Arab Republic (579.2%, 218.2% to 1263.6%), Yemen, Libya, Türkiye, and Sudan (22.2%, 5.5% to 42.6%). In contrast, Lebanon, Iran, Iraq,

Afghanistan, Kuwait, Algeria, Qatar, Oman, and UAE showed statistically significant declines in age-standardised rates of YLDs related to head or spinal injuries.

### 3. Modifiable risk factors

Of total risk-attributed stroke DALYs in NAME, on average 73·3% (1287·3, 1028·1–1590·0) were related to metabolic risk factors, 34·1% (598·2, 464·3–757·4) related to behavioural risk factors, and 30·8% (540·9, 400·9–699·4) related to environmental/occupational risk factors (Table S7). In the region, 7·1% (5·0, 3·5–7·0) of meningitis, 3·8% (1·6, 0·9–2·6) of encephalitis, 2·1% (3·4, 1·9–5·5) of idiopathic epilepsy, and 10·8% (2·2, 1·5–3·0) of multiple sclerosis were attributable to modifiable risk factors. Ranks of neurological age-standardised DALYs rates attributable to modifiable risk factors in 21 North Africa and Middle East countries and seven GBD super regions are depicted in Figure S10.

**Figure S10. Ranks of age-standardised rates of (A) stroke and (B) dementia disability-adjusted life years (DALYs) attributable to risk factors in North Africa and Middle East countries compared with other regions in the world in 2019.**

Ranks range from 1 (dark red) with the highest rate to 20 (dark green) with the lowest rate. Dementia includes Alzheimer’s disease and other dementias; Stroke includes ischaemic stroke, haemorrhagic stroke, and subarachnoid haemorrhage.

**A Stroke**

|                                          | Central Europe, Eastern Europe, and Central Asia | Southeast Asia, East Asia, and Oceania | Latin America and Central Asia | High-income | World Bank Low Income | World Bank Upper Middle Income | World Bank Lower Middle Income | World Bank Low Income | World Bank Upper Middle Income | World Bank Lower Middle Income | North Africa and Middle East | Algeria | Bahrain | Egypt | Iran | Iraq | Jordan | Kuwait | Lebanon | Libya | Morocco | Palestine | Oman | Qatar | Saudi Arabia | Syrian Arab Republic | Tunisia | Turkey | United Arab Emirates | Yemen | Afghanistan | Sudan |    |
|------------------------------------------|--------------------------------------------------|----------------------------------------|--------------------------------|-------------|-----------------------|--------------------------------|--------------------------------|-----------------------|--------------------------------|--------------------------------|------------------------------|---------|---------|-------|------|------|--------|--------|---------|-------|---------|-----------|------|-------|--------------|----------------------|---------|--------|----------------------|-------|-------------|-------|----|
| High systolic blood pressure             | 1                                                | 1                                      | 1                              | 1           | 1                     | 1                              | 1                              | 1                     | 1                              | 1                              | 1                            | 1       | 1       | 1     | 1    | 1    | 1      | 1      | 1       | 1     | 1       | 1         | 1    | 1     | 1            | 1                    | 1       | 1      | 1                    | 1     | 1           | 1     |    |
| High body-mass index                     | 2                                                | 4                                      | 2                              | 2           | 2                     | 4                              | 3                              | 2                     | 3                              | 3                              | 3                            | 2       | 2       | 2     | 2    | 2    | 2      | 2      | 2       | 2     | 3       | 3         | 3    | 2     | 2            | 2                    | 3       | 2      | 2                    | 3     | 4           | 3     |    |
| High fasting plasma glucose              | 3                                                | 6                                      | 4                              | 3           | 3                     | 2                              | 4                              | 3                     | 5                              | 2                              | 4                            | 3       | 3       | 4     | 4    | 3    | 4      | 3      | 4       | 3     | 3       | 2         | 2    | 2     | 4            | 4                    | 3       | 2      | 3                    | 3     | 2           | 2     | 2  |
| Ambient particulate matter pollution     | 4                                                | 2                                      | 6                              | 7           | 5                     | 3                              | 5                              | 6                     | 2                              | 4                              | 7                            | 4       | 4       | 3     | 3    | 4    | 3      | 4      | 3       | 5     | 4       | 4         | 4    | 4     | 3            | 3                    | 4       | 4      | 4                    | 4     | 4           | 7     | 4  |
| Smoking                                  | 5                                                | 3                                      | 3                              | 4           | 4                     | 6                              | 7                              | 4                     | 4                              | 6                              | 5                            | 6       | 6       | 7     | 6    | 6    | 5      | 6      | 6       | 4     | 7       | 7         | 6    | 7     | 7            | 7                    | 5       | 6      | 5                    | 6     | 5           | 11    | 7  |
| Diet high in sodium                      | 6                                                | 5                                      | 9                              | 10          | 9                     | 10                             | 8                              | 10                    | 6                              | 9                              | 8                            | 17      | 17      | 16    | 16   | 14   | 16     | 17     | 12      | 15    | 16      | 15        | 17   | 16    | 14           | 17                   | 17      | 15     | 14                   | 15    | 19          | 18    | 19 |
| Household air pollution from solid fuels | 7                                                | 8                                      | 17                             | 19          | 10                    | 5                              | 2                              | 20                    | 13                             | 5                              | 2                            | 14      | 20      | 20    | 20   | 20   | 20     | 20     | 19      | 19    | 20      | 16        | 20   | 19    | 20           | 20                   | 20      | 19     | 20                   | 6     | 3           | 5     |    |
| High LDL cholesterol                     | 8                                                | 7                                      | 5                              | 5           | 7                     | 11                             | 12                             | 5                     | 7                              | 10                             | 11                           | 5       | 5       | 5     | 5    | 6    | 5      | 5      | 6       | 5     | 5       | 5         | 5    | 5     | 5            | 6                    | 5       | 6      | 5                    | 7     | 5           | 6     |    |
| Kidney dysfunction                       | 9                                                | 10                                     | 10                             | 11          | 8                     | 9                              | 9                              | 11                    | 10                             | 8                              | 9                            | 7       | 7       | 6     | 7    | 7    | 7      | 7      | 7       | 7     | 6       | 6         | 7    | 6     | 6            | 6                    | 7       | 7      | 7                    | 7     | 9           | 8     | 8  |
| Diet low in fruits                       | 10                                               | 13                                     | 12                             | 12          | 13                    | 7                              | 6                              | 12                    | 12                             | 7                              | 6                            | 13      | 12      | 14    | 14   | 15   | 8      | 11     | 10      | 14    | 11      | 14        | 11   | 15    | 16           | 9                    | 10      | 12     | 15                   | 13    | 10          | 10    | 12 |
| Diet high in red meat                    | 11                                               | 9                                      | 8                              | 6           | 6                     | 19                             | 14                             | 7                     | 8                              | 16                             | 15                           | 15      | 13      | 9     | 10   | 13   | 17     | 13     | 8       | 11    | 12      | 11        | 15   | 9     | 9            | 14                   | 13      | 13     | 11                   | 10    | 17          | 15    | 17 |
| Low temperature                          | 12                                               | 12                                     | 7                              | 8           | 18                    | 17                             | 15                             | 8                     | 9                              | 17                             | 14                           | 8       | 11      | 13    | 12   | 8    | 11     | 10     | 15      | 10    | 13      | 9         | 12   | 13    | 12           | 15                   | 8       | 9      | 8                    | 14    | 18          | 9     | 18 |
| Alcohol use                              | 13                                               | 11                                     | 11                             | 9           | 11                    | 15                             | 11                             | 9                     | 11                             | 14                             | 13                           | 20      | 19      | 18    | 19   | 19   | 19     | 19     | 20      | 17    | 19      | 20        | 18   | 20    | 18           | 19                   | 18      | 16     | 16                   | 19    | 20          | 20    | 20 |
| Lead exposure                            | 14                                               | 14                                     | 19                             | 18          | 14                    | 8                              | 13                             | 18                    | 14                             | 11                             | 12                           | 10      | 14      | 15    | 8    | 10   | 13     | 15     | 16      | 13    | 15      | 12        | 14   | 12    | 15           | 11                   | 9       | 11     | 13                   | 17    | 8           | 6     | 9  |
| Diet low in fiber                        | 15                                               | 16                                     | 15                             | 13          | 15                    | 13                             | 17                             | 13                    | 17                             | 12                             | 16                           | 16      | 18      | 17    | 17   | 16   | 14     | 14     | 17      | 16    | 14      | 19        | 10   | 18    | 17           | 18                   | 15      | 18     | 17                   | 18    | 12          | 13    | 13 |
| Secondhand smoke                         | 16                                               | 15                                     | 14                             | 17          | 17                    | 14                             | 16                             | 16                    | 15                             | 15                             | 17                           | 12      | 10      | 12    | 11   | 12   | 10     | 12     | 13      | 12    | 10      | 13        | 13   | 14    | 13           | 10                   | 14      | 10     | 12                   | 12    | 14          | 16    | 15 |
| Diet low in vegetables                   | 17                                               | 18                                     | 18                             | 16          | 12                    | 12                             | 10                             | 17                    | 19                             | 13                             | 10                           | 18      | 16      | 19    | 18   | 18   | 18     | 16     | 18      | 18    | 17      | 17        | 16   | 17    | 19           | 16                   | 16      | 19     | 18                   | 16    | 13          | 12    | 16 |
| Diet low in whole grains                 | 18                                               | 17                                     | 13                             | 14          | 19                    | 18                             | 18                             | 14                    | 16                             | 18                             | 18                           | 9       | 9       | 10    | 13   | 9    | 12     | 8      | 14      | 8     | 8       | 8         | 8    | 11    | 11           | 13                   | 11      | 8      | 9                    | 11    | 11          | 14    | 11 |
| Low physical activity                    | 19                                               | 19                                     | 16                             | 15          | 16                    | 20                             | 20                             | 15                    | 18                             | 20                             | 20                           | 11      | 8       | 8     | 9    | 11   | 9      | 9      | 9       | 9     | 10      | 9         | 8    | 8     | 8            | 12                   | 14      | 10     | 8                    | 15    | 17          | 10    |    |
| High temperature                         | 20                                               | 20                                     | 20                             | 20          | 20                    | 16                             | 19                             | 19                    | 20                             | 19                             | 19                           | 15      | 11      | 15    | 17   | 15   | 18     | 11     | 20      | 18    | 18      | 19        | 10   | 10    | 12           | 19                   | 17      | 20     | 9                    | 16    | 19          | 14    |    |

**B Dementias**

|                             | Central Europe, Eastern Europe, and Central Asia | Southeast Asia, East Asia, and Oceania | Global | High-income | Latin America and Central Asia | World Bank Upper-Middle Income | World Bank High Income | World Bank Lower-Middle Income | World Bank Low Income | North Africa and Middle East | Algeria | Bahrain | Egypt | Iran | Iraq | Jordan | Kuwait | Lebanon | Libya | Morocco | Palestine | Oman | Qatar | Saudi Arabia | Syrian Arab Republic | Tunisia | Turkey | United Arab Emirates | Yemen | Afghanistan | Sudan |   |   |
|-----------------------------|--------------------------------------------------|----------------------------------------|--------|-------------|--------------------------------|--------------------------------|------------------------|--------------------------------|-----------------------|------------------------------|---------|---------|-------|------|------|--------|--------|---------|-------|---------|-----------|------|-------|--------------|----------------------|---------|--------|----------------------|-------|-------------|-------|---|---|
| Smoking                     | 1                                                | 1                                      | 2      | 1           | 2                              | 1                              | 3                      | 1                              | 1                     | 1                            | 2       | 2       | 2     | 3    | 1    | 3      | 2      | 2       | 2     | 1       | 3         | 3    | 1     | 3            | 3                    | 3       | 1      | 2                    | 2     | 3           | 1     | 3 | 2 |
| High body-mass index        | 2                                                | 3                                      | 1      | 2           | 1                              | 3                              | 1                      | 2                              | 2                     | 3                            | 3       | 1       | 1     | 2    | 2    | 1      | 1      | 1       | 2     | 1       | 1         | 3    | 1     | 1            | 1                    | 2       | 1      | 1                    | 1     | 3           | 2     | 3 |   |
| High fasting plasma glucose | 3                                                | 2                                      | 3      | 3           | 3                              | 2                              | 2                      | 3                              | 3                     | 2                            | 1       | 3       | 3     | 1    | 3    | 2      | 3      | 3       | 3     | 2       | 2         | 2    | 2     | 2            | 2                    | 3       | 3      | 3                    | 2     | 2           | 1     | 1 |   |

From 1990 to 2019, the highest rises in stroke-related DALYs attributable to risk factors were observed for high fasting plasma glucose (98.2%, 68.5% to 132.0%), kidney dysfunction (51.9%, 38.8% to 65.2%), ambient particulate matter pollution (51.1%, 32.0% to 79.4%), low physical activity (48.9%, 35.5% to 63.0%), and high LDL-cholesterol (45.8%, 34.3% to 56.5%; Tables S7 and S8). These increases were higher than the global average (except for ambient particulate matter pollution). Likewise, from 1990 to 2019, dementia-related DALYs attributable to high fasting plasma glucose and high body-mass index increased by 61.0% (52.2% to 77.0%) and 50.5% (31.6% to 90.9%), respectively, which were 2-times the corresponding global PAFs.

From 1990 to 2019, stroke DALYs rate attributable to high fasting plasma glucose decreased globally (-9.8%, 95% UI -17.6% to -0.5%), while it increased in North Africa and Middle East (34.8%, 7.9% to 64.8%) with its highest increases in Egypt and Morocco (supplementary Tables S7 and S8). These changes were even more substantial for ischaemic strokes. Dementia DALY rates attributable to high fasting plasma glucose in the region (59.1%, 47.1% to 88.7%) were almost twice the global estimates (34.0%, 28.0% to 47.7%). There was a statistically significant reduction in the risk-attributed age-standardised DALYs rate related to stroke (-25.8%, -34.1% to -14.0%), Parkinson's disease (-19.0%, -31.8% to -1.7%), and meningitis (-78.5%, -85.6% to -67.8%), while it increased for dementia (19.0%, 6.7% to 37.7%). The highest reduction in the risk was attributable to household air pollution from solid fuels (with almost 50% to 85% reduction) and the two most marked increases were related to high fasting plasma glucose (on average 67.7% increase for ischaemic stroke and 59.1% increase for dementia) and high body-mass index (on average 37.1% increase for ischaemic stroke and 48.7% increase for dementia).

During the same period, among the countries of the North Africa and Middle East region, stroke DALYs rate attributable to ambient particulate matter pollution increased in Sudan (206.9%, 95% UI 59.0% to 596.3%), Yemen (204.1%, 60.2% to 642.4%), Afghanistan (112.6%, 15.3% to 436.2%), and Morocco (93.7%, 24.3% to 264.0%). There were also increasing trends of ischaemic stroke DALYs rates attributable to tobacco in Afghanistan and Egypt; of dementia in Qatar (42.2%, 4.6% to 85.2%) and Egypt (36.1%, 12.0% to 65.5%); of Parkinson's disease in Egypt (36.2%, 0.6% to 80.7%); and of multiple sclerosis in Afghanistan (81.4%, 26.4% to 153.6%), Saudi Arabia (56.6%, 9.9% to 129.6%), and Lebanon (47%, 13.9% to 92.5%). Iran was the only country in the region where stroke DALYs (197.8%, 20.0% to 2297.6%) and idiopathic epilepsy DALYs (204.6%, 90.2% to 478.2%) attributable to alcohol significantly increased.

**4. Age- and sex-specific proportions**

For neurological deaths in 2019, 60.1% (187.6, 95% UI 167.5–207.4 thousand) of all-type stroke deaths happened in the elderly (aged 70 years and older; Table S10). It was 70.2% (147.4, 130.7–163.4 thousand) for ischaemic stroke, 39.7% (35.2, 30.9–39.6 thousand) for intracerebral haemorrhage, and 36.8% (5.0, 4.0–6.1 thousand) for subarachnoid haemorrhage. Haemorrhagic strokes were almost equally distributed among the age groups 50–69 and

≥70 years. Of all deaths, 90·5% of dementia (63·8, 15·8–169·6 thousand; Table S11) and 82·9% of Parkinson's disease (13·9, 11·9–18·3 thousand; Table S12) was estimated at the elderly.

In 2019, 2058 thousand head injuries and 143 thousand spinal injuries happened among females, 1351 thousand head injuries and 77 thousand spinal injuries among males in NAME. Age- and cause-specific neurological DALYs in North Africa and Middle East among women and men are illustrated in Figure S11.

**Figure S11. Age-specific burden of neurological conditions in North Africa and Middle East measured by disability-adjusted life years (DALYs) among (A) males and (B) females.**

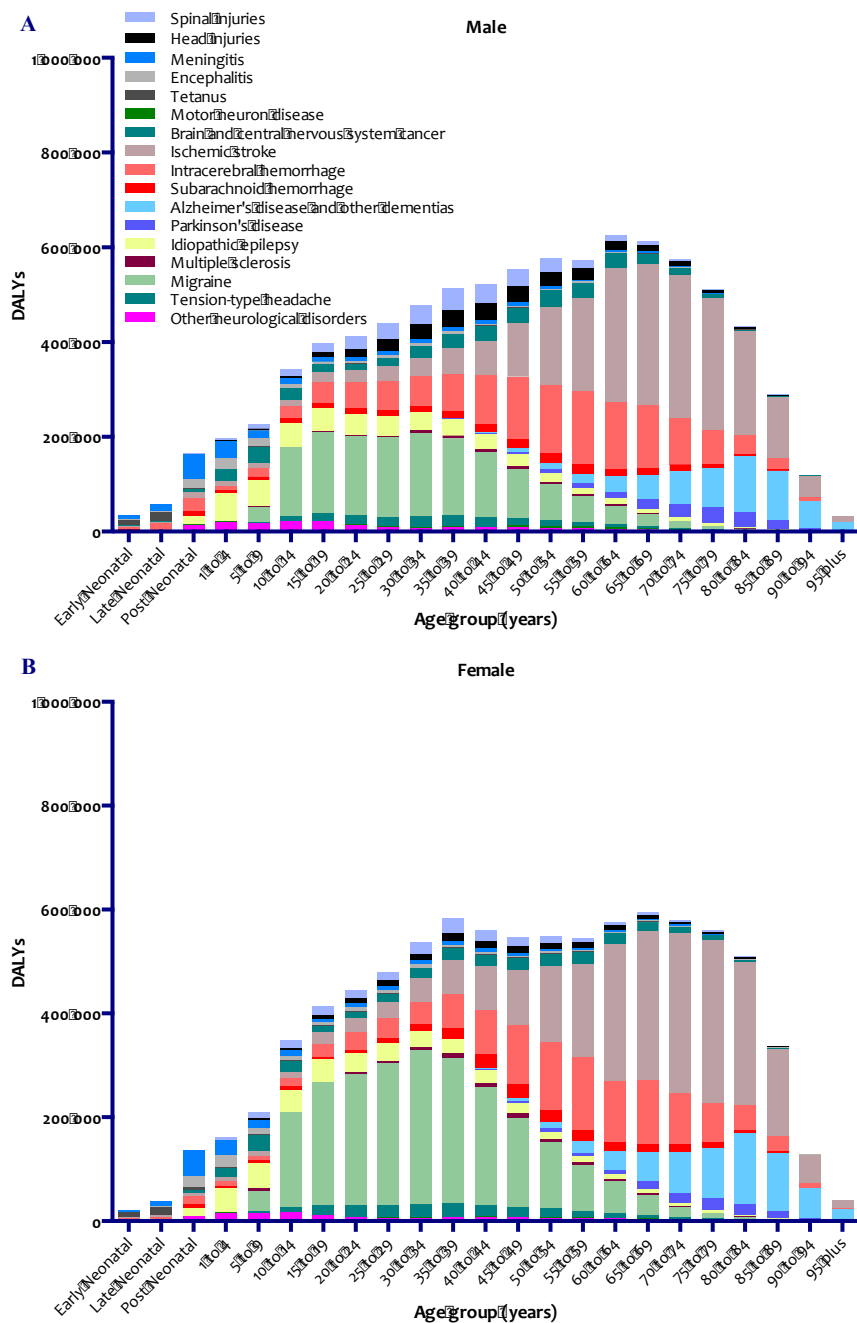

## 5. Supplementary results tables

### *Table S10 Global and regional burden, mortality, incidence, and prevalence of neurological conditions in different regions of the world*

(NEXT PAGE)

|                                |     |
|--------------------------------|-----|
| Disability-Adjusted Life Years | 106 |
| Deaths                         | 112 |
| Incidence                      | 117 |
| Prevalence                     | 123 |
| Years Lived with Disability    | 130 |
| Years of Life Lost             | 136 |

**Table S10** Global and regional burden, mortality, incidence, and prevalence of neurological conditions in different regions of the world

| Measure                                       | Cause                                            | Region        | All Ages                  |                          | Age-standardised    |                          | Sex ratio<br>2019<br>F:M |
|-----------------------------------------------|--------------------------------------------------|---------------|---------------------------|--------------------------|---------------------|--------------------------|--------------------------|
|                                               |                                                  |               | Number (thousand)         | Percent change           | Rate per 100 000    | Percent change           |                          |
|                                               |                                                  |               | 2019                      | From 1990 to 2019        | 2019                | From 1990 to 2019        |                          |
|                                               |                                                  | Mean (95% UI) | Mean (95% UI)             | Mean (95% UI)            | Mean (95% UI)       |                          |                          |
| <b>DALYs (Disability-Adjusted Life Years)</b> |                                                  |               |                           |                          |                     |                          |                          |
| Meningitis                                    | Global                                           |               | 16333.2 (13775.1–19609.8) | -51.3% (-59.4 to -42%)   | 234 (195.8–282.5)   | -57.2% (-64.4 to -48.6%) | 0.86                     |
|                                               | Southeast Asia, East Asia, and Oceania           |               | 1117.6 (985.8–1270.5)     | -81.9% (-85.2 to -78.3%) | 69.5 (60.4–80)      | -79.9% (-83.6 to -75.7%) | 0.71                     |
|                                               | Central Europe, Eastern Europe, and Central Asia |               | 149.1 (134.2–165.2)       | -74.8% (-77.4 to -71.9%) | 40.1 (35.8–45.1)    | -75.2% (-78 to -72%)     | 0.68                     |
|                                               | High-income                                      |               | 157.7 (146.4–169.1)       | -64.4% (-66.2 to -62.5%) | 16.2 (14.9–17.5)    | -72.2% (-74.2 to -70.3%) | 0.80                     |
|                                               | Latin America and Caribbean                      |               | 355.6 (295.1–421.5)       | -75.2% (-80.2 to -69.8%) | 67.5 (55.4–80.6)    | -77.7% (-82.2 to -72.5%) | 0.73                     |
|                                               | North Africa and Middle East                     |               | 412.8 (345.2–495)         | -70.5% (-77.5 to -62.3%) | 70 (58.7–83.7)      | -75.8% (-81.1 to -69.5%) | 0.91                     |
|                                               | South Asia                                       |               | 3712.1 (3190.9–4384.3)    | -62.8% (-70 to -54.4%)   | 217.8 (186.5–258.7) | -69.2% (-75.1 to -62.7%) | 1.01                     |
|                                               | Sub-Saharan Africa                               |               | 10428.3 (8282.7–12983.1)  | -22.8% (-37.9 to -2.2%)  | 781.5 (640.4–945.5) | -56.6% (-64.2 to -46.3%) | 0.80                     |
|                                               | World Bank High Income                           |               | 167.6 (155.1–180.4)       | -65.6% (-67.5 to -63.8%) | 15.2 (14–16.4)      | -73.6% (-75.5 to -71.8%) | 0.80                     |
|                                               | World Bank Upper Middle Income                   |               | 941.8 (851.2–1042.1)      | -82.2% (-84.9 to -79.2%) | 42.3 (37.9–47.3)    | -82.6% (-85.4 to -79.6%) | 0.74                     |
|                                               | World Bank Lower Middle Income                   |               | 9369.5 (7877.6–11295.6)   | -50.1% (-58.6 to -39.2%) | 296.9 (250–357.4)   | -60% (-66.5 to -51.8%)   | 0.90                     |
|                                               | World Bank Low Income                            |               | 5844.3 (4689.2–7297.5)    | -34.8% (-47.8 to -18.4%) | 670.1 (553.9–805.1) | -61.3% (-68.3 to -52.9%) | 0.79                     |
| Encephalitis                                  | Global                                           |               | 4797.4 (4059.5–6418.1)    | -43.4% (-55.8 to -15.8%) | 65.3 (55.1–87.3)    | -54.3% (-63.9 to -32.9%) | 0.87                     |
|                                               | Southeast Asia, East Asia, and Oceania           |               | 756.8 (611.2–863.9)       | -51.4% (-61.9 to -27.4%) | 43.9 (34.1–50.7)    | -50% (-61 to -30.1%)     | 0.76                     |
|                                               | Central Europe, Eastern Europe, and Central Asia |               | 198.8 (172.4–232)         | -27.7% (-36.2 to -8.1%)  | 55.4 (47.2–66)      | -22.8% (-33.1 to -0.2%)  | 0.79                     |
|                                               | High-income                                      |               | 111.5 (95.8–121)          | 22.2% (5.1 to 31.8%)     | 10.1 (8.7–11.1)     | -4% (-16.2 to 4.5%)      | 0.87                     |
|                                               | Latin America and Caribbean                      |               | 187.8 (155.6–227.1)       | -17.2% (-32.2 to 4%)     | 34.8 (28.6–42.2)    | -29.6% (-42.7 to -12.4%) | 0.83                     |
|                                               | North Africa and Middle East                     |               | 251 (200.2–332.9)         | 13.5% (-21 to 59.6%)     | 42 (33.6–55.6)      | -20.7% (-43.3 to 8.7%)   | 1.09                     |
|                                               | South Asia                                       |               | 2924 (2349.5–4371.6)      | -50.4% (-63.8 to -21%)   | 174.3 (140.4–258.4) | -61.2% (-70.7 to -39.2%) | 0.95                     |
|                                               | Sub-Saharan Africa                               |               | 367.5 (294.9–480.1)       | 77.7% (32.8 to 123.6%)   | 32.3 (26.6–40.9)    | -7.2% (-25.9 to 10.2%)   | 0.74                     |
|                                               | World Bank High Income                           |               | 129.8 (115.4–141.4)       | 3.8% (-5.7 to 11.1%)     | 10.9 (9.8–12.1)     | -20.3% (-27.1 to -13.9%) | 0.87                     |
|                                               | World Bank Upper Middle Income                   |               | 688.2 (604.3–803.5)       | -50.6% (-59.6 to -27.5%) | 30.7 (26.8–36.6)    | -52.2% (-61.1 to -29.4%) | 0.84                     |
|                                               | World Bank Lower Middle Income                   |               | 3641 (3003.3–5085.3)      | -45.5% (-58.9 to -16.5%) | 120.5 (100.2–167.9) | -58% (-67.2 to -38.1%)   | 0.89                     |
|                                               | World Bank Low Income                            |               | 336.5 (277.7–419.4)       | 23% (-13.3 to 104.7%)    | 46.9 (39.2–55.1)    | -29.5% (-46.7 to 6%)     | 0.87                     |
| Tetanus                                       | Global                                           |               | 2316.4 (1770–3279.4)      | -89.4% (-92.1 to -83.8%) | 33.7 (25.6–47.9)    | -90.2% (-92.7 to -85.1%) | 0.86                     |
|                                               | Southeast Asia, East Asia, and Oceania           |               | 222.5 (134.8–275.7)       | -93.9% (-96.6 to -91.2%) | 11.6 (7.6–14.4)     | -94.5% (-96.5 to -92.1%) | 0.64                     |
|                                               | Central Europe, Eastern Europe, and Central Asia |               | 0.9 (0.6–1.9)             | -84.3% (-88 to -68.6%)   | 0.2 (0.1–0.4)       | -84.8% (-88.2 to -70.2%) | 0.63                     |
|                                               | High-income                                      |               | 1.4 (1.1–3)               | -83.8% (-87.1 to -66.5%) | 0.1 (0.1–0.2)       | -88.9% (-91.1 to -77.3%) | 0.67                     |
|                                               | Latin America and Caribbean                      |               | 23.4 (14.7–44.1)          | -89.7% (-93.8 to -80.4%) | 4.5 (2.7–8.7)       | -91.5% (-94.9 to -83.5%) | 1.07                     |
|                                               | North Africa and Middle East                     |               | 87.4 (53.6–139.5)         | -85.8% (-92.9 to -68.7%) | 15 (9.2–24.1)       | -88.2% (-93.9 to -76.1%) | 0.85                     |
|                                               | South Asia                                       |               | 828.7 (567–1157.6)        | -94.2% (-96 to -91.2%)   | 50.7 (34.6–71.1)    | -94.3% (-96.2 to -91.5%) | 1.00                     |
|                                               | Sub-Saharan Africa                               |               | 1152.1 (809.6–1865.2)     | -62.8% (-76.5 to -33.7%) | 84.5 (57.7–133.2)   | -78.9% (-85.9 to -67.7%) | 0.75                     |
|                                               | World Bank High Income                           |               | 3.2 (2–5.2)               | -85.9% (-95.3 to -69.1%) | 0.2 (0.2–0.4)       | -91.3% (-97.3 to -79.1%) | 0.60                     |
|                                               | World Bank Upper Middle Income                   |               | 40 (30–62.5)              | -97.7% (-98.3 to -96.1%) | 1.6 (1.3–2.4)       | -98% (-98.5 to -96.7%)   | 0.50                     |
|                                               | World Bank Lower Middle Income                   |               | 1514.2 (1111.5–2028.3)    | -91.1% (-93.8 to -87.3%) | 49 (35.9–65.5)      | -92.2% (-94.5 to -89.2%) | 0.85                     |

**Table S10** Global and regional burden, mortality, incidence, and prevalence of neurological conditions in different regions of the world

| Measure                                 |                                                  | All Ages                     |                          | Age-standardised         |                          | Sex ratio |
|-----------------------------------------|--------------------------------------------------|------------------------------|--------------------------|--------------------------|--------------------------|-----------|
|                                         |                                                  | Number (thousand)            | Percent change           | Rate per 100 000         | Percent change           |           |
| Cause                                   | Region                                           | 2019                         | From 1990 to 2019        | 2019                     | From 1990 to 2019        | 2019      |
|                                         |                                                  | Mean (95% UI)                | Mean (95% UI)            | Mean (95% UI)            | Mean (95% UI)            | F:M       |
| Brain and central nervous system cancer | World Bank Low Income                            | 757.7 (508.7–1318)           | -74.5% (-83.9 to -46.8%) | 82.4 (53.6–138.9)        | -84.4% (-89.6 to -71.7%) | 0.77      |
|                                         | Global                                           | 8659.9 (6718–9574.5)         | 40.5% (-13.2 to 66.9%)   | 109 (84.6–120.9)         | -10.4% (-43.5 to 5.3%)   | 0.71      |
|                                         | Southeast Asia, East Asia, and Oceania           | 2672.7 (2000.7–3135.9)       | 22.9% (-20.6 to 65.7%)   | 112.3 (84.7–131.7)       | -18.5% (-47.3 to 8.2%)   | 0.77      |
|                                         | Central Europe, Eastern Europe, and Central Asia | 823.5 (611.1–936.8)          | 18.6% (-21 to 36.4%)     | 168.5 (126.7–191.9)      | 5.8% (-29.8 to 21.7%)    | 0.65      |
|                                         | High-income                                      | 1738.8 (1250.5–1883.5)       | 30.9% (-16.5 to 42.2%)   | 122.6 (90.9–132)         | -8.5% (-41 to -1%)       | 0.66      |
|                                         | Latin America and Caribbean                      | 711.7 (480.3–832.7)          | 110.6% (3.3 to 175.7%)   | 121.3 (81.6–142.3)       | 28.7% (-36.7 to 68.1%)   | 0.76      |
|                                         | North Africa and Middle East                     | 716.3 (493.9–848.2)          | 71% (0.9 to 131.7%)      | 128.3 (87.8–151.3)       | -5% (-40 to 23.4%)       | 0.86      |
|                                         | South Asia                                       | 1383.2 (1081.7–1662.4)       | 47.8% (-13.8 to 119.4%)  | 81.1 (63.4–97.8)         | -1.2% (-38.2 to 34.9%)   | 0.67      |
|                                         | Sub-Saharan Africa                               | 613.7 (449.4–782.3)          | 122.6% (19.3 to 259.5%)  | 62.3 (43.7–76.4)         | 13.9% (-34.7 to 64.8%)   | 0.68      |
|                                         | World Bank High Income                           | 1920.9 (1379.9–2092.2)       | 29.5% (-18.1 to 41.4%)   | 123.2 (91.5–133.4)       | -10.4% (-42.9 to -2.6%)  | 0.67      |
|                                         | World Bank Upper Middle Income                   | 3722.2 (2788.2–4206)         | 30.9% (-19.1 to 57.1%)   | 126.9 (94.8–142.9)       | -12% (-45.8 to 5.4%)     | 0.76      |
| World Bank Lower Middle Income          | 2560.3 (1954.2–2955.2)                           | 59.8% (-6 to 114.3%)         | 85.1 (64.7–98.2)         | 0.7% (-36.7 to 27.2%)    | 0.71                     |           |
| Stroke                                  | World Bank Low Income                            | 452.1 (330.3–578.7)          | 93.9% (7.7 to 217.5%)    | 70 (50.4–87.8)           | 3.6% (-38.4 to 51.6%)    | 0.70      |
|                                         | Global                                           | 143232.2 (133095.8–153241.8) | 32.4% (22 to 42.2%)      | 1768.1 (1640.6–1889.4)   | -35.2% (-40.5 to -30.5%) | 0.76      |
|                                         | Southeast Asia, East Asia, and Oceania           | 66050 (59613.2–72976.5)      | 48.3% (29 to 69.3%)      | 2563.5 (2312.5–2827.2)   | -35.8% (-44.5 to -27%)   | 0.66      |
|                                         | Central Europe, Eastern Europe, and Central Asia | 14351.9 (13236.4–15424.1)    | -8.9% (-14.7 to -3%)     | 2327.5 (2144–2500.4)     | -32.4% (-36.6 to -28%)   | 0.70      |
|                                         | High-income                                      | 13703.4 (12355.7–14781.7)    | -16.4% (-20.3 to -12.9%) | 653.2 (596.1–704.9)      | -52.9% (-54.8 to -50.9%) | 0.84      |
|                                         | Latin America and Caribbean                      | 6196.6 (5710.4–6688.8)       | 22.2% (13.5 to 31.4%)    | 1060 (976.7–1144.7)      | -50.3% (-53.8 to -46.7%) | 0.83      |
|                                         | North Africa and Middle East                     | 7946 (7060.2–8870.8)         | 43.3% (27.2 to 61.4%)    | 1826.2 (1635.3–2026.2)   | -32% (-39.1 to -23.3%)   | 1.04      |
|                                         | South Asia                                       | 24119.3 (21416.4–26859.9)    | 70.4% (47.3 to 95.6%)    | 1702.6 (1510.9–1891)     | -30.6% (-40.6 to -19.8%) | 0.87      |
|                                         | Sub-Saharan Africa                               | 10865 (9479.7–12395.1)       | 61.2% (40.8 to 84.4%)    | 2216.8 (1955.9–2495.9)   | -22.8% (-31.8 to -12.2%) | 0.90      |
|                                         | World Bank High Income                           | 15753.7 (14247.6–17024)      | -16% (-19.9 to -12.5%)   | 705.1 (643.6–762.9)      | -52.4% (-54.5 to -50.4%) | 0.83      |
|                                         | World Bank Upper Middle Income                   | 67195.7 (60574.6–73873.7)    | 27.6% (12.4 to 44.2%)    | 2067.2 (1863.6–2269.6)   | -42% (-48.7 to -34.9%)   | 0.68      |
| World Bank Lower Middle Income          | 51615 (47355.1–55856.7)                          | 64.6% (48.8 to 79.5%)        | 2177.1 (1999.5–2348.3)   | -25.6% (-33.1 to -17.8%) | 0.85                     |           |
| World Bank Low Income                   | 8585.9 (7346.5–9955.9)                           | 59.2% (39.1 to 81.7%)        | 2591.6 (2230.8–2981.7)   | -21.8% (-30.5 to -12%)   | 0.90                     |           |
| Ischaemic stroke                        | Global                                           | 63478.3 (57827.4–68986.5)    | 56.7% (43.3 to 67.9%)    | 798.8 (727.5–866.9)      | -28.5% (-34.7 to -23.2%) | 0.83      |
|                                         | Southeast Asia, East Asia, and Oceania           | 28355.4 (25100.2–31773.5)    | 138.8% (95.3 to 172.6%)  | 1144 (1016.4–1276.1)     | -3.2% (-21.4 to 10%)     | 0.73      |
|                                         | Central Europe, Eastern Europe, and Central Asia | 9122.6 (8355–9868.2)         | -9.3% (-16.1 to -2.8%)   | 1444.2 (1321.2–1560.7)   | -35.2% (-39.8 to -30.7%) | 0.78      |
|                                         | High-income                                      | 7774.2 (6824.5–8572.7)       | -18.2% (-22.8 to -14.2%) | 334.7 (295–371.2)        | -56.9% (-59.4 to -54.6%) | 0.88      |
|                                         | Latin America and Caribbean                      | 2582.8 (2358.5–2802.4)       | 39% (27.9 to 51.2%)      | 458 (417.2–496.6)        | -49.4% (-53.4 to -45%)   | 0.80      |
|                                         | North Africa and Middle East                     | 4751.4 (4227.7–5271.9)       | 120% (89 to 148.1%)      | 1183.6 (1060.8–1307)     | -8.8% (-19.6 to 2.2%)    | 1.09      |
|                                         | South Asia                                       | 7745.9 (6612–9077.2)         | 122.3% (83.9 to 159.8%)  | 605.3 (521.1–706.7)      | -19.4% (-34.1 to -4.1%)  | 0.84      |
|                                         | Sub-Saharan Africa                               | 3145.9 (2777.4–3620.1)       | 102.3% (77.8 to 126%)    | 766.5 (680.9–868.6)      | -3.8% (-16.1 to 7.4%)    | 1.08      |
|                                         | World Bank High Income                           | 9137.4 (8085.3–10026)        | -17.2% (-21.7 to -13.1%) | 374.6 (332–414)          | -55.8% (-58.2 to -53.5%) | 0.88      |



**Table S10** Global and regional burden, mortality, incidence, and prevalence of neurological conditions in different regions of the world

| Measure                      | Cause                                            | Region                     | All Ages                  |                                     | Age-standardised         |                                     | Sex ratio<br>2019<br>F:M |
|------------------------------|--------------------------------------------------|----------------------------|---------------------------|-------------------------------------|--------------------------|-------------------------------------|--------------------------|
|                              |                                                  |                            | Number (thousand)<br>2019 | Percent change<br>From 1990 to 2019 | Rate per 100 000<br>2019 | Percent change<br>From 1990 to 2019 |                          |
|                              |                                                  |                            | Mean (95% UI)             | Mean (95% UI)                       | Mean (95% UI)            | Mean (95% UI)                       |                          |
| Intracerebral haemorrhage    | World Bank Upper Middle Income                   | 33246 (29880.2–36557.8)    | 75.2% (53.8 to 94.2%)     | 1044.2 (934.2–1144.9)               | -26% (-35.1 to -18.2%)   | 0.77                                |                          |
|                              | World Bank Lower Middle Income                   | 18608.3 (16613–20667.5)    | 100.4% (76.5 to 120.9%)   | 876 (784.4–965.2)                   | -16.9% (-26.7 to -6.5%)  | 0.90                                |                          |
|                              | World Bank Low Income                            | 2455.7 (2117.3–2893.7)     | 106.7% (83.9 to 130.6%)   | 863.8 (740–1008.7)                  | -2.3% (-12.7 to 8.5%)    | 1.01                                |                          |
|                              | Global                                           | 68572.5 (63272.3–73682)    | 25.3% (12.2 to 36.3%)     | 832.8 (769.2–894.7)                 | -36.7% (-43.3 to -31%)   | 0.68                                |                          |
|                              | Southeast Asia, East Asia, and Oceania           | 34034.3 (30443.4–37734.8)  | 30.7% (10.8 to 50.5%)     | 1280 (1147.9–1417)                  | -43.2% (-52.3 to -34.5%) | 0.59                                |                          |
|                              | Central Europe, Eastern Europe, and Central Asia | 4223 (3867.2–4548.8)       | -11.4% (-19.2 to -3.7%)   | 705.2 (645.6–760.3)                 | -30.2% (-36.4 to -24.2%) | 0.57                                |                          |
|                              | High-income                                      | 4061 (3756.2–4310.9)       | -20.3% (-24.6 to -16.2%)  | 208.3 (196.2–220.4)                 | -53.1% (-55.1 to -50.9%) | 0.65                                |                          |
|                              | Latin America and Caribbean                      | 2611.3 (2385.7–2852)       | 4.4% (-5 to 14.8%)        | 437 (399.1–477)                     | -55.9% (-59.8 to -51.5%) | 0.73                                |                          |
|                              | North Africa and Middle East                     | 2702.2 (2343.7–3120.3)     | 3.4% (-12.3 to 21.4%)     | 548.4 (479.5–623.1)                 | -51.7% (-58.2 to -43.8%) | 0.93                                |                          |
|                              | South Asia                                       | 13740.6 (11774.7–15890.6)  | 55.7% (31.8 to 79.7%)     | 931.4 (798.1–1075.7)                | -35.4% (-45.5 to -25.1%) | 0.88                                |                          |
| Sub-Saharan Africa           | 7200.1 (6126.6–8347)                             | 47.7% (27 to 71.9%)        | 1372.6 (1177.7–1584.4)    | -30.4% (-39.5 to -20.2%)            | 0.82                     |                                     |                          |
| Subarachnoid haemorrhage     | World Bank High Income                           | 4627 (4293.3–4918.2)       | -20.6% (-24.9 to -16.8%)  | 223.3 (209.7–237.3)                 | -52.6% (-54.9 to -50.3%) | 0.64                                |                          |
|                              | World Bank Upper Middle Income                   | 29543.7 (26176–33096.9)    | 12.3% (-5.2 to 30.2%)     | 888.3 (787.4–993.2)                 | -47.7% (-55.7 to -39.7%) | 0.56                                |                          |
|                              | World Bank Lower Middle Income                   | 28752.2 (25833.6–31579.3)  | 53.7% (36.5 to 69.9%)     | 1144.8 (1029–1257.6)                | -29.5% (-37.8 to -21.5%) | 0.81                                |                          |
|                              | World Bank Low Income                            | 5606.1 (4742.9–6615.2)     | 45.4% (25.3 to 69.2%)     | 1601.9 (1366–1878.7)                | -28.8% (-37.6 to -18.5%) | 0.85                                |                          |
|                              | Global                                           | 11181.4 (9893.4–12668.9)   | -13.8% (-25.7 to 17%)     | 136.5 (120.8–154.7)                 | -54.2% (-60.6 to -37.5%) | 0.89                                |                          |
|                              | Southeast Asia, East Asia, and Oceania           | 3660.2 (3083.4–4334.7)     | -44.8% (-58.7 to -6.2%)   | 139.5 (117.9–164.7)                 | -74.8% (-81.2 to -56.6%) | 0.71                                |                          |
|                              | Central Europe, Eastern Europe, and Central Asia | 1006.3 (909.5–1111.8)      | 9.1% (-3.4 to 23.6%)      | 178.1 (160.9–198.3)                 | -11.2% (-21.5 to 1%)     | 0.73                                |                          |
|                              | High-income                                      | 1868.1 (1710.2–2025.1)     | 4.5% (-0.9 to 12%)        | 110.2 (101.7–118.9)                 | -33.6% (-37 to -28.4%)   | 1.16                                |                          |
|                              | Latin America and Caribbean                      | 1002.6 (911–1107.4)        | 40.3% (25 to 57.8%)       | 165.1 (149.8–182.5)                 | -30.6% (-38.3 to -21.8%) | 1.29                                |                          |
|                              | North Africa and Middle East                     | 492.4 (408.3–617.2)        | -36% (-50.6 to 6.8%)      | 94.2 (79–116.8)                     | -62.8% (-71.6 to -41%)   | 1.08                                |                          |
| Neurological disorders*      | South Asia                                       | 2632.9 (1703–3567.1)       | 42.6% (11.4 to 136.3%)    | 165.9 (106.3–224.5)                 | -36.6% (-51.2 to 5.5%)   | 0.94                                |                          |
|                              | Sub-Saharan Africa                               | 519 (315.8–1049)           | 67.6% (27.6 to 133.8%)    | 77.7 (45.3–155.7)                   | -24.5% (-37.9 to 1.6%)   | 0.62                                |                          |
|                              | World Bank High Income                           | 1989.3 (1819.3–2157.5)     | 4.6% (-0.7 to 12%)        | 107.2 (98.8–115.6)                  | -34.2% (-37.4 to -29%)   | 1.16                                |                          |
|                              | World Bank Upper Middle Income                   | 4406 (3829.6–5013.8)       | -40.2% (-52.7 to -5.7%)   | 134.7 (117.2–152.9)                 | -70.4% (-76.6 to -52.7%) | 0.81                                |                          |
|                              | World Bank Lower Middle Income                   | 4254.5 (3188.4–5488.9)     | 26.8% (3 to 88.7%)        | 156.3 (117–200.7)                   | -36.9% (-49.9 to -6%)    | 0.89                                |                          |
|                              | World Bank Low Income                            | 524.1 (302.8–1007.1)       | 50.3% (18.1 to 106.3%)    | 125.9 (71.8–238.4)                  | -30% (-42.5 to -7.8%)    | 0.79                                |                          |
|                              | Global                                           | 97724.4 (55942.8–159416.8) | 69.9% (58.7 to 90%)       | 1253.6 (719.7–2039.8)               | -0.8% (-5.1 to 3.1%)     | 1.22                                |                          |
|                              | Southeast Asia, East Asia, and Oceania           | 25859.8 (13866.4–43640.3)  | 70.2% (53.2 to 100.8%)    | 1134 (609.5–1887.4)                 | 0.4% (-7.4 to 6.9%)      | 1.24                                |                          |
|                              | Central Europe, Eastern Europe, and Central Asia | 6580.3 (4025–10385.4)      | 21.4% (11.9 to 35.5%)     | 1301.9 (775.1–2061.4)               | 0.7% (-2.8 to 4.4%)      | 1.24                                |                          |
|                              | High-income                                      | 21294.8 (12967.1–33532)    | 58.2% (40.1 to 84.6%)     | 1315.6 (731.2–2146.3)               | 1.1% (-1 to 3.8%)        | 1.37                                |                          |
| Latin America and Caribbean  | 7896.1 (4420.2–12972)                            | 78.9% (62 to 107.7%)       | 1352.4 (767.1–2203.8)     | -2.3% (-8.6 to 2.8%)                | 1.24                     |                                     |                          |
| North Africa and Middle East | 7156 (3769.7–12184.4)                            | 91.1% (72 to 109.7%)       | 1382.1 (776.6–2273.8)     | -3.9% (-10.3 to 3.5%)               | 1.25                     |                                     |                          |

**Table S10** Global and regional burden, mortality, incidence, and prevalence of neurological conditions in different regions of the world

| Measure                                 | Region                                           | All Ages                                   |                                                      | Age-standardised                          |                                                      | Sex ratio<br>2019<br>F:M |
|-----------------------------------------|--------------------------------------------------|--------------------------------------------|------------------------------------------------------|-------------------------------------------|------------------------------------------------------|--------------------------|
|                                         |                                                  | Number (thousand)<br>2019<br>Mean (95% UI) | Percent change<br>From 1990 to 2019<br>Mean (95% UI) | Rate per 100 000<br>2019<br>Mean (95% UI) | Percent change<br>From 1990 to 2019<br>Mean (95% UI) |                          |
| Alzheimer's disease and other dementias | South Asia                                       | 19068.9 (9725.7–32172.8)                   | 77% (52.9 to 102.6%)                                 | 1189.8 (648.5–1975.5)                     | -4.3% (-13.7 to 5%)                                  | 1.20                     |
|                                         | Sub-Saharan Africa                               | 9868.5 (5609.8–16119.2)                    | 119.2% (98.1 to 140%)                                | 1283.3 (772.9–2013.8)                     | 0.7% (-5.8 to 8.1%)                                  | 1.09                     |
|                                         | World Bank High Income                           | 23193.6 (14090–36738.4)                    | 58.2% (41 to 83.7%)                                  | 1319.7 (738.4–2145.1)                     | 0.9% (-1.4 to 3.6%)                                  | 1.35                     |
|                                         | World Bank Upper Middle Income                   | 34291.3 (19343.5–55999.5)                  | 63.3% (47.8 to 90.1%)                                | 1199.5 (670.6–1953.1)                     | -0.8% (-7.9 to 4.8%)                                 | 1.23                     |
|                                         | World Bank Lower Middle Income                   | 34025.6 (17416.8–57071.1)                  | 80.5% (64.3 to 99.3%)                                | 1240.6 (681–2047.5)                       | -2.1% (-8.4 to 5%)                                   | 1.20                     |
|                                         | World Bank Low Income                            | 6158.7 (3509.2–10018.6)                    | 107.8% (81.8 to 131.2%)                              | 1226.8 (724.6–1939.7)                     | -1.9% (-9.4 to 4.9%)                                 | 1.12                     |
|                                         | Global                                           | 25277 (11204.5–54558.2)                    | 161.6% (149.7 to 175.7%)                             | 338.6 (151–731.3)                         | 3.7% (-0.3 to 8.1%)                                  | 1.19                     |
|                                         | Southeast Asia, East Asia, and Oceania           | 7765.2 (3410.6–17185.4)                    | 211.5% (178 to 254.4%)                               | 361.2 (159.6–784.8)                       | 5.3% (-5.7 to 18.7%)                                 | 1.26                     |
|                                         | Central Europe, Eastern Europe, and Central Asia | 2092.9 (961.1–4507)                        | 71.9% (63.5 to 81.4%)                                | 335 (154.1–720.4)                         | 4.3% (0 to 8.7%)                                     | 1.11                     |
|                                         | High-income                                      | 8678.2 (4036.8–17955.9)                    | 127.3% (117.1 to 137.5%)                             | 329.5 (153.9–685.4)                       | 2.4% (-1.4 to 5.6%)                                  | 1.20                     |
|                                         | Latin America and Caribbean                      | 1922 (821.6–4193.6)                        | 238.7% (219.9 to 260.6%)                             | 351.8 (150.7–765.5)                       | 2.7% (-2.4 to 8.7%)                                  | 1.05                     |
|                                         | North Africa and Middle East                     | 1208.1 (532–2672.8)                        | 177.3% (161.1 to 215.8%)                             | 387 (172–848.5)                           | -1.1% (-6.6 to 12.1%)                                | 1.12                     |
|                                         | South Asia                                       | 2617.6 (1061–6225.2)                       | 260.7% (225 to 300.6%)                               | 262.1 (105.6–617.4)                       | 10% (0.1 to 21.5%)                                   | 1.06                     |
|                                         | Sub-Saharan Africa                               | 993.1 (406.6–2267.4)                       | 144.1% (128.4 to 161%)                               | 344.5 (140.3–797.7)                       | 8.5% (2.4 to 15.5%)                                  | 1.21                     |
|                                         | World Bank High Income                           | 9244.2 (4299.4–19139.6)                    | 126.6% (116.4 to 136.8%)                             | 331.6 (154.5–692.5)                       | 2.2% (-1.4 to 5.4%)                                  | 1.20                     |
| World Bank Upper Middle Income          | 10365.3 (4584.1–22624)                           | 194.9% (170 to 224.2%)                     | 359.6 (160–781.7)                                    | 4.7% (-2.9 to 13.7%)                      | 1.17                                                 |                          |
| World Bank Lower Middle Income          | 4955.3 (2039.9–11483.4)                          | 178.1% (161 to 202.7%)                     | 298.1 (122–689.3)                                    | 3.2% (-2.9 to 12.9%)                      | 1.13                                                 |                          |
| World Bank Low Income                   | 699.5 (291–1608.7)                               | 148.7% (132.3 to 167.6%)                   | 348.6 (144.7–801.4)                                  | 5.6% (-0.8 to 13%)                        | 1.21                                                 |                          |
| Parkinson's disease                     | Global                                           | 6292.6 (5769.2–6827.2)                     | 128.9% (113.3 to 142.5%)                             | 80 (73.3–86.6)                            | 2.4% (-4.4 to 8.2%)                                  | 0.56                     |
|                                         | Southeast Asia, East Asia, and Oceania           | 2044.9 (1794–2305.7)                       | 141.2% (111.1 to 172.6%)                             | 83.8 (73.7–94.1)                          | -8.6% (-19.7 to 2.6%)                                | 0.56                     |
|                                         | Central Europe, Eastern Europe, and Central Asia | 467.2 (426.9–508.2)                        | 50.2% (41.5 to 60.3%)                                | 72.7 (66.4–79.1)                          | 4.9% (-0.9 to 12.1%)                                 | 0.57                     |
|                                         | High-income                                      | 1822.1 (1648.7–1954.3)                     | 107.3% (97.9 to 113.9%)                              | 76.5 (69.5–82.3)                          | 9.8% (5.9 to 12.7%)                                  | 0.49                     |
|                                         | Latin America and Caribbean                      | 412.5 (372.9–452.1)                        | 208.4% (188.6 to 230.4%)                             | 74.3 (67.2–81.4)                          | 5.3% (-1.4 to 12.7%)                                 | 0.59                     |
|                                         | North Africa and Middle East                     | 300.7 (266.3–365.4)                        | 163.8% (134.8 to 202.1%)                             | 84.4 (74.7–103.2)                         | 0.9% (-10.2 to 15.7%)                                | 0.68                     |
|                                         | South Asia                                       | 984.6 (854.6–1124.9)                       | 182.8% (135.4 to 231.5%)                             | 82.1 (71–94)                              | -2.9% (-18.5 to 14.2%)                               | 0.67                     |
|                                         | Sub-Saharan Africa                               | 260.7 (231.4–300.6)                        | 125.1% (95.6 to 155.2%)                              | 75.6 (67–88.2)                            | 7.2% (-6.3 to 20.9%)                                 | 0.66                     |
|                                         | World Bank High Income                           | 1942.4 (1761.3–2087.9)                     | 106% (96.9 to 112.3%)                                | 76.6 (69.7–82.5)                          | 9.2% (5.5 to 12.2%)                                  | 0.49                     |
|                                         | World Bank Upper Middle Income                   | 2509.8 (2240.6–2799.6)                     | 132.6% (108.6 to 155.9%)                             | 79.5 (70.8–88.5)                          | -5.9% (-15.3 to 3.1%)                                | 0.56                     |
| World Bank Lower Middle Income          | 1646.2 (1483–1820.6)                             | 159.4% (125.5 to 189.4%)                   | 83.4 (75.1–92)                                       | 5.2% (-8.5 to 17%)                        | 0.66                                                 |                          |
| World Bank Low Income                   | 190.8 (165.6–225.5)                              | 108.8% (83.6 to 134.4%)                    | 76.9 (67–91.6)                                       | -2.4% (-13.5 to 8.9%)                     | 0.64                                                 |                          |
| Idiopathic epilepsy                     | Global                                           | 13077.6 (9986.7–16734.1)                   | 15.9% (0 to 42.1%)                                   | 170.6 (130.4–218.3)                       | -16.5% (-27.4 to 1.7%)                               | 0.82                     |
|                                         | Southeast Asia, East Asia, and Oceania           | 2259.6 (1627.7–3002.3)                     | -10.6% (-28.5 to 14.2%)                              | 108 (77.8–144.4)                          | -25.1% (-40.5 to -4.7%)                              | 0.79                     |

**Table S10** Global and regional burden, mortality, incidence, and prevalence of neurological conditions in different regions of the world

| Measure                                          | Region                                           | All Ages                  | Percent change<br>From 1990 to 2019 | Age-standardised         | Percent change<br>From 1990 to 2019 | Sex ratio<br>2019    |
|--------------------------------------------------|--------------------------------------------------|---------------------------|-------------------------------------|--------------------------|-------------------------------------|----------------------|
|                                                  |                                                  | Number (thousand)<br>2019 |                                     | Rate per 100 000<br>2019 |                                     |                      |
| Cause                                            |                                                  | Mean (95% UI)             | Mean (95% UI)                       | Mean (95% UI)            | Mean (95% UI)                       | F:M                  |
| Multiple sclerosis                               | Central Europe, Eastern Europe, and Central Asia | 704.5 (523.2–930.3)       | -5.8% (-19.5 to 9.3%)               | 170.4 (127.1–227)        | -5.2% (-19 to 9.8%)                 | 0.73                 |
|                                                  | High-income                                      | 1295.1 (894.3–1900.4)     | 15% (-3.8 to 35.3%)                 | 112.5 (76.5–165.9)       | -8.4% (-23.4 to 7.7%)               | 0.86                 |
|                                                  | Latin America and Caribbean                      | 1287 (944.9–1721.7)       | 13.1% (-6.2 to 38.4%)               | 219.9 (161.2–295.2)      | -23.9% (-36.9 to -7.6%)             | 0.84                 |
|                                                  | North Africa and Middle East                     | 955.3 (682.8–1293.2)      | 13.8% (-13.8 to 56%)                | 158.3 (112.6–213.2)      | -26.2% (-43.6 to -1.1%)             | 0.87                 |
|                                                  | South Asia                                       | 3697.9 (2884.5–4712.2)    | 9.7% (-13.9 to 54.7%)               | 207.4 (162.1–263.8)      | -29.3% (-43.7 to -3.6%)             | 0.98                 |
|                                                  | Sub-Saharan Africa                               | 2878.2 (2129.4–3822.1)    | 87.2% (54.3 to 144.2%)              | 270.1 (203.1–355.3)      | -11.8% (-26.2 to 10.6%)             | 0.64                 |
|                                                  | World Bank High Income                           | 1538.6 (1059.2–2235.1)    | 17.5% (0.1 to 36.8%)                | 121.2 (82.2–176.2)       | -6.9% (-20.8 to 8.6%)               | 0.83                 |
|                                                  | World Bank Upper Middle Income                   | 3549 (2603.4–4672.1)      | -10.8% (-26.2 to 9%)                | 137.7 (100.7–182.1)      | -25.6% (-38.2 to -9.6%)             | 0.81                 |
|                                                  | World Bank Lower Middle Income                   | 6201.9 (4795.7–7893.3)    | 25.5% (3.2 to 68.4%)                | 196.3 (151.4–250.3)      | -20% (-33.3 to 4.5%)                | 0.86                 |
|                                                  | World Bank Low Income                            | 1779.9 (1288.5–2380.3)    | 69.1% (34.9 to 130.5%)              | 249.5 (183.5–329.2)      | -16.6% (-32.1 to 8.6%)              | 0.70                 |
|                                                  | Global                                           | 1159.8 (1001.2–1381.9)    | 59.7% (46.6 to 72.7%)               | 14 (12–16.6)             | -13.2% (-20.9 to -6.3%)             | 1.57                 |
|                                                  | Southeast Asia, East Asia, and Oceania           | 108 (91.1–139.8)          | 46.5% (14.5 to 110.9%)              | 4 (3.3–5.1)              | -21% (-37.7 to 12.5%)               | 0.98                 |
|                                                  | Central Europe, Eastern Europe, and Central Asia | 132.8 (99.3–214.1)        | -7% (-23 to 29.4%)                  | 25.4 (18.9–41.2)         | -19.9% (-34 to 12.6%)               | 1.31                 |
|                                                  | High-income                                      | 550 (451.1–647.2)         | 52.9% (24.1 to 63.2%)               | 36.5 (30–43.3)           | 7.8% (-10.4 to 14.1%)               | 1.85                 |
|                                                  | Latin America and Caribbean                      | 59.3 (50–72)              | 158.7% (108.2 to 190%)              | 9.6 (8.1–11.7)           | 19.4% (-4.7 to 33.9%)               | 1.44                 |
|                                                  | North Africa and Middle East                     | 115.9 (93.1–144.8)        | 146% (98.9 to 205.5%)               | 19.9 (16.1–24.7)         | 6.2% (-11.6 to 30.5%)               | 1.58                 |
|                                                  | South Asia                                       | 144.1 (119.7–177.5)       | 134.3% (86.2 to 210.3%)             | 8.6 (7.1–10.5)           | 10.3% (-11.7 to 47.5%)              | 1.42                 |
|                                                  | Sub-Saharan Africa                               | 49.8 (40.8–62.4)          | 172.1% (107.2 to 239.4%)            | 7.2 (6–9.1)              | 14.9% (-10.8 to 44.2%)              | 1.69                 |
|                                                  | Migraine                                         | World Bank High Income    | 591.2 (490.1–695.4)                 | 48.2% (21.8 to 58%)      | 35.5 (29.4–42.3)                    | 2.5% (-13.8 to 9.7%) |
| World Bank Upper Middle Income                   |                                                  | 271.4 (226.1–346.5)       | 46.4% (27.6 to 75.8%)               | 8.3 (6.9–10.5)           | -17.5% (-28.1 to -2%)               | 1.30                 |
| World Bank Lower Middle Income                   |                                                  | 262.3 (223.2–319.6)       | 106% (74 to 152.7%)                 | 9 (7.7–11)               | -0.2% (-15 to 21.7%)                | 1.38                 |
| World Bank Low Income                            |                                                  | 34.2 (26.2–44.7)          | 145.8% (90.1 to 196.7%)             | 7.4 (5.6–9.6)            | 7.5% (-15 to 29.6%)                 | 1.58                 |
| Global                                           |                                                  | 42077.7 (6418.4–95645.2)  | 56.6% (52.6 to 62.1%)               | 525.5 (78.8–1194)        | 1.5% (-4.4 to 3.3%)                 | 1.70                 |
| Southeast Asia, East Asia, and Oceania           |                                                  | 11650.2 (1650.6–27010.1)  | 49.5% (41.1 to 59.8%)               | 488.1 (64.8–1135)        | 6.7% (-3 to 10.5%)                  | 1.65                 |
| Central Europe, Eastern Europe, and Central Asia |                                                  | 2468.6 (656.6–5214.9)     | 4.1% (1.7 to 9.5%)                  | 541.2 (131.6–1161.6)     | -0.5% (-2.7 to 0.3%)                | 1.86                 |
| High-income                                      |                                                  | 6617.2 (1167.8–14754.8)   | 17.2% (13.8 to 28%)                 | 587.6 (89.5–1321.7)      | 0.6% (-1 to 2.2%)                   | 2.06                 |
| Latin America and Caribbean                      |                                                  | 3388.3 (455.7–7790.2)     | 63.7% (56.7 to 91.3%)               | 557.2 (74.1–1281.5)      | 2.2% (-0.1 to 4.2%)                 | 1.94                 |
| North Africa and Middle East                     |                                                  | 3793.2 (645.3–8665.8)     | 102.1% (93.2 to 125.1%)             | 601.4 (107–1371.8)       | 0% (-1.6 to 1.6%)                   | 1.70                 |
| South Asia                                       |                                                  | 9779.9 (1150.3–22319.5)   | 86.3% (79.3 to 99.4%)               | 526.3 (66.1–1196.4)      | 0.6% (-2.2 to 3.6%)                 | 1.54                 |
| Sub-Saharan Africa                               |                                                  | 4380.3 (668.4–9895.8)     | 135.7% (132.2 to 138.9%)            | 461 (81.5–1033.8)        | 1.2% (-0.2 to 2.3%)                 | 1.54                 |
| World Bank High Income                           |                                                  | 7368.2 (1321.7–16430.4)   | 19.6% (16 to 30.6%)                 | 584.6 (90.8–1312.1)      | 0.5% (-1.4 to 2.2%)                 | 2.02                 |
| World Bank Upper Middle Income                   |                                                  | 14488 (2455.8–32795.2)    | 44.8% (37.8 to 53%)                 | 503.1 (78.6–1148.7)      | 5.7% (-5.5 to 9.7%)                 | 1.75                 |
| World Bank Lower Middle Income                   |                                                  | 17514.6 (2229.5–40394.2)  | 84.1% (78.8 to 93.5%)               | 544 (74.1–1244.9)        | 0.1% (-2.3 to 1.8%)                 | 1.57                 |
| World Bank Low Income                            |                                                  | 2682.5 (416.6–6084.3)     | 130.4% (126.5 to 133.4%)            | 432.4 (77.5–968.1)       | 1.4% (0 to 2.4%)                    | 1.58                 |

**Table S10** Global and regional burden, mortality, incidence, and prevalence of neurological conditions in different regions of the world

| Measure                                          | Cause                                            | Region                                 | All Ages                  |                                     | Age-standardised         |                                     | Sex ratio<br>2019<br>F:M |      |
|--------------------------------------------------|--------------------------------------------------|----------------------------------------|---------------------------|-------------------------------------|--------------------------|-------------------------------------|--------------------------|------|
|                                                  |                                                  |                                        | Number (thousand)<br>2019 | Percent change<br>From 1990 to 2019 | Rate per 100 000<br>2019 | Percent change<br>From 1990 to 2019 |                          |      |
|                                                  |                                                  |                                        | Mean (95% UI)             | Mean (95% UI)                       | Mean (95% UI)            | Mean (95% UI)                       |                          |      |
| Tension-type headache                            | Global                                           |                                        | 4541.7 (1395.5–14981.3)   | 57.8% (45.1 to 65.9%)               | 56.2 (17–188.5)          | -2.5% (-5.4 to 1.1%)                | 1.25                     |      |
|                                                  | Southeast Asia, East Asia, and Oceania           |                                        | 1126.6 (354.3–3731.9)     | 52.5% (26.4 to 74.1%)               | 46 (13.8–161.6)          | 1.7% (-5.8 to 14.3%)                | 1.10                     |      |
|                                                  | Central Europe, Eastern Europe, and Central Asia |                                        | 411.7 (145.4–1182.2)      | 6.7% (-0.7 to 12.1%)                | 85.9 (28.8–257.4)        | -1.4% (-4 to 1.5%)                  | 1.43                     |      |
|                                                  | High-income                                      |                                        | 846.4 (251.2–2751)        | 23.9% (12.5 to 31.8%)               | 68.7 (19.2–230.1)        | 0% (-4.6 to 2.6%)                   | 1.36                     |      |
|                                                  | Latin America and Caribbean                      |                                        | 331.7 (95.8–1195.2)       | 76.7% (50.4 to 99.5%)               | 54.3 (15.6–196.1)        | 0.3% (-4.4 to 4.2%)                 | 1.33                     |      |
|                                                  | North Africa and Middle East                     |                                        | 416.6 (138.3–1196.8)      | 115.5% (84.9 to 132.3%)             | 68.1 (22.8–195.5)        | 1% (-9.5 to 8.7%)                   | 1.28                     |      |
|                                                  | South Asia                                       |                                        | 930.2 (251.8–3573.8)      | 92.1% (70.8 to 107.2%)              | 51.7 (14.3–193.5)        | 0.5% (-6.1 to 7.5%)                 | 1.21                     |      |
|                                                  | Sub-Saharan Africa                               |                                        | 478.5 (142.5–1776.1)      | 133.2% (122.4 to 143.2%)            | 55 (17.7–184.3)          | 0.2% (-4.5 to 4.7%)                 | 1.27                     |      |
|                                                  | World Bank High Income                           |                                        | 942.1 (286.1–3013.9)      | 25.8% (13.1 to 34.1%)               | 68.5 (19.6–226.6)        | -0.5% (-5.8 to 2%)                  | 1.36                     |      |
|                                                  | World Bank Upper Middle Income                   |                                        | 1594.4 (533.9–4790.4)     | 46.5% (25.3 to 59.9%)               | 53.3 (16.9–170)          | -1.4% (-7.6 to 7.4%)                | 1.21                     |      |
|                                                  | World Bank Lower Middle Income                   |                                        | 1706.7 (486.1–6242.3)     | 87.7% (70.5 to 98.5%)               | 54.9 (15.9–191.2)        | -1.1% (-5.7 to 4.1%)                | 1.23                     |      |
|                                                  | World Bank Low Income                            |                                        | 296.1 (87.9–1098.6)       | 127.2% (116.2 to 137.7%)            | 51.6 (16.5–173.5)        | 0.4% (-4.5 to 5%)                   | 1.27                     |      |
|                                                  | Motor neuron disease                             | Global                                 |                           | 1034.6 (979.9–1085.4)               | 65.7% (55.5 to 77.7%)    | 12.7 (12–13.3)                      | -4.5% (-10.1 to 1.9%)    | 0.71 |
|                                                  |                                                  | Southeast Asia, East Asia, and Oceania |                           | 134 (117.9–150.6)                   | -18.2% (-31.5 to -3.9%)  | 5.5 (4.9–6.1)                       | -45% (-53.5 to -35.5%)   | 0.61 |
| Central Europe, Eastern Europe, and Central Asia |                                                  |                                        | 54.9 (50.1–59.8)          | 83.9% (58.5 to 108%)                | 10.1 (9.3–11)            | 45.2% (26.4 to 63.3%)               | 0.69                     |      |
| High-income                                      |                                                  |                                        | 629.5 (594–658.1)         | 87.8% (79.1 to 95.6%)               | 36.8 (35–38.5)           | 12.9% (8 to 17.7%)                  | 0.70                     |      |
| Latin America and Caribbean                      |                                                  |                                        | 89.3 (79.3–98.7)          | 222.3% (180.5 to 262.9%)            | 14.9 (13.2–16.5)         | 69.4% (47.3 to 90%)                 | 0.69                     |      |
| North Africa and Middle East                     |                                                  |                                        | 41.6 (33.8–50.6)          | 22.5% (-28.9 to 88.7%)              | 7.8 (6.4–9.5)            | -16.6% (-44.8 to 17.9%)             | 0.73                     |      |
| South Asia                                       |                                                  |                                        | 72.6 (58–88.7)            | 168.8% (121 to 219.5%)              | 4.5 (3.6–5.5)            | 45.8% (18.1 to 78.8%)               | 0.81                     |      |
| Sub-Saharan Africa                               |                                                  |                                        | 12.6 (10.5–15)            | 89.4% (52.8 to 127.7%)              | 1.6 (1.3–1.9)            | -16.3% (-34.8 to 5.1%)              | 1.08                     |      |
| World Bank High Income                           |                                                  |                                        | 646.1 (609.2–676.3)       | 86.7% (77.8 to 94.6%)               | 34.8 (33–36.5)           | 11.9% (7 to 16.9%)                  | 0.71                     |      |
| World Bank Upper Middle Income                   |                                                  |                                        | 261 (238.7–284.1)         | 17.4% (1 to 36.1%)                  | 8.6 (7.8–9.3)            | -22.3% (-32.7 to -10.3%)            | 0.66                     |      |
| World Bank Lower Middle Income                   |                                                  |                                        | 116.1 (101.3–133.1)       | 138.5% (104.4 to 173.1%)            | 4.1 (3.6–4.7)            | 30.3% (9.4 to 52.3%)                | 0.78                     |      |
| World Bank Low Income                            |                                                  |                                        | 10.8 (9–13.1)             | 56% (18.1 to 92.3%)                 | 2 (1.7–2.5)              | -14.4% (-32.1 to 3.5%)              | 1.02                     |      |
| Other neurological disorders                     |                                                  | Global                                 |                           | 4263.4 (3458.9–5174.1)              | 56.5% (41.8 to 74.3%)    | 55.9 (45.2–68.3)                    | 10.8% (0.4 to 22.9%)     | 0.83 |
|                                                  |                                                  | Southeast Asia, East Asia, and Oceania |                           | 771.2 (613.5–948.2)                 | 37.9% (17.7 to 61.6%)    | 37.5 (29–47.1)                      | 13% (-3.8 to 33.7%)      | 0.77 |
|                                                  | Central Europe, Eastern Europe, and Central Asia |                                        | 247.8 (206–299.3)         | 14.5% (3.3 to 26.7%)                | 61.1 (49.6–75.2)         | 14.2% (1.4 to 28.1%)                | 0.74                     |      |
|                                                  | High-income                                      |                                        | 856.3 (762.7–976)         | 38.3% (32 to 45.5%)                 | 67.6 (58.1–80.6)         | 0.3% (-6.3 to 9%)                   | 0.78                     |      |
|                                                  | Latin America and Caribbean                      |                                        | 406.1 (325–507.4)         | 52.8% (34.1 to 76.6%)               | 70.4 (55.9–88.4)         | 5.9% (-6.8 to 21.2%)                | 0.81                     |      |
|                                                  | North Africa and Middle East                     |                                        | 324.7 (250.4–417.3)       | 59.4% (26.5 to 98.9%)               | 55.2 (43–70.4)           | 6.3% (-13.5 to 30.6%)               | 0.76                     |      |
|                                                  | South Asia                                       |                                        | 842.1 (623.2–1115.9)      | 66.4% (40 to 120.6%)                | 47.1 (35–62)             | 13.2% (-4.9 to 44.2%)               | 0.96                     |      |
|                                                  | Sub-Saharan Africa                               |                                        | 815.2 (589.6–1087.3)      | 130% (85.4 to 183.9%)               | 68.2 (51.6–88.8)         | 12.1% (-7.3 to 35.1%)               | 0.88                     |      |
|                                                  | World Bank High Income                           |                                        | 921 (812.7–1057.4)        | 36.6% (30 to 43.9%)                 | 66.9 (56.8–80)           | -0.5% (-7.7 to 8.8%)                | 0.78                     |      |
|                                                  | World Bank Upper Middle Income                   |                                        | 1252.4 (1012.2–1518)      | 34.8% (19.5 to 52.8%)               | 49.5 (39.2–61.1)         | 11.8% (-1.8 to 27.9%)               | 0.78                     |      |
|                                                  | World Bank Lower Middle Income                   |                                        | 1622.4 (1227.5–2090.3)    | 80.9% (55.6 to 120.6%)              | 50.8 (38.9–64.4)         | 19.6% (2.7 to 43.6%)                | 0.90                     |      |

**Table S10** Global and regional burden, mortality, incidence, and prevalence of neurological conditions in different regions of the world

| Measure            | Cause         | Region                                           | All Ages                                   |                                                      | Age-standardised                          |                                                      | Sex ratio<br>2019<br>F:M |      |
|--------------------|---------------|--------------------------------------------------|--------------------------------------------|------------------------------------------------------|-------------------------------------------|------------------------------------------------------|--------------------------|------|
|                    |               |                                                  | Number (thousand)<br>2019<br>Mean (95% UI) | Percent change<br>From 1990 to 2019<br>Mean (95% UI) | Rate per 100 000<br>2019<br>Mean (95% UI) | Percent change<br>From 1990 to 2019<br>Mean (95% UI) |                          |      |
| Headache disorders |               | World Bank Low Income                            | 464·8 (332·6–633·8)                        | 108·1% (65·6 to 166·2%)                              | 58·3 (43–78·1)                            | 6·7% (-12·6 to 33·3%)                                | 0·86                     |      |
|                    |               | Global                                           | 46619·4 (9772·9–100161·7)                  | 56·7% (52·4 to 62·1%)                                | 581·8 (119·6–1255·6)                      | 1·1% (-4·2 to 2·9%)                                  | 1·65                     |      |
|                    |               | Southeast Asia, East Asia, and Oceania           | 12776·9 (2520·4–28023·2)                   | 49·8% (40·9 to 60%)                                  | 534·1 (98·6–1189·2)                       | 6·3% (-2·7 to 10·1%)                                 | 1·59                     |      |
|                    |               | Central Europe, Eastern Europe, and Central Asia | 2880·3 (987·5–5766·8)                      | 4·5% (2 to 9·3%)                                     | 627·1 (196–1287·8)                        | -0·6% (-2·6 to 0·3%)                                 | 1·79                     |      |
|                    |               | High-income                                      | 7463·5 (1712·2–15883)                      | 18% (14·5 to 27·9%)                                  | 656·3 (135·9–1424·6)                      | 0·5% (-1·3 to 2%)                                    | 1·97                     |      |
|                    |               | Latin America and Caribbean                      | 3720 (683–8205·9)                          | 64·8% (57·2 to 90·5%)                                | 611·5 (111·4–1348·8)                      | 2·1% (-0·4 to 4·1%)                                  | 1·88                     |      |
|                    |               | North Africa and Middle East                     | 4209·8 (990·1–9068·3)                      | 103·3% (94·5 to 123·7%)                              | 669·6 (159·1–1431·3)                      | 0·1% (-2·4 to 2·4%)                                  | 1·65                     |      |
|                    |               | South Asia                                       | 10710 (1765·8–23536·8)                     | 86·8% (79·5 to 99·8%)                                | 578 (100·5–1258·7)                        | 0·6% (-2·4 to 3·7%)                                  | 1·51                     |      |
|                    |               | Sub-Saharan Africa                               | 4858·8 (1002·7–10481·4)                    | 135·4% (130·5 to 138·7%)                             | 516·1 (123·2–1089·1)                      | 1·1% (-0·8 to 2·4%)                                  | 1·51                     |      |
|                    |               | World Bank High Income                           | 8310·2 (1933–17641·9)                      | 20·2% (16·7 to 30·3%)                                | 653·1 (138·2–1410·8)                      | 0·4% (-1·6 to 2%)                                    | 1·94                     |      |
|                    |               | World Bank Upper Middle Income                   | 16082·4 (3701·8–34346)                     | 44·9% (37·6 to 52·8%)                                | 556·4 (118·8–1199·2)                      | 4·9% (-5·3 to 9·1%)                                  | 1·69                     |      |
|                    |               | World Bank Lower Middle Income                   | 19221·3 (3425–41915·3)                     | 84·4% (78·7 to 93·6%)                                | 598·8 (112·2–1302·8)                      | 0% (-2·5 to 1·7%)                                    | 1·54                     |      |
|                    |               | World Bank Low Income                            | 2978·5 (625·3–6424)                        | 130·1% (125 to 133·4%)                               | 484·1 (115·9–1022·8)                      | 1·3% (-0·8 to 2·6%)                                  | 1·54                     |      |
|                    | <b>Deaths</b> |                                                  |                                            |                                                      |                                           |                                                      |                          |      |
| Meningitis         |               | Global                                           | 236·2 (204·4–277·4)                        | -45·4% (-53·5 to -35·8%)                             | 3·3 (2·8–3·9)                             | -56% (-62·5 to -48·3%)                               | 0·84                     |      |
|                    |               | Southeast Asia, East Asia, and Oceania           | 18·2 (16·3–20·5)                           | -76·3% (-80·3 to -71·7%)                             | 1 (0·9–1·2)                               | -77·4% (-81·2 to -73·2%)                             | 0·68                     |      |
|                    |               | Central Europe, Eastern Europe, and Central Asia | 2·7 (2·4–3)                                | -67% (-70·3 to -63·3%)                               | 0·6 (0·6–0·7)                             | -71·4% (-74·5 to -67·9%)                             | 0·59                     |      |
|                    |               | High-income                                      | 3·8 (3·6–4)                                | -50·3% (-52·8 to -48·2%)                             | 0·3 (0·3–0·3)                             | -68·9% (-70·7 to -67·3%)                             | 0·75                     |      |
|                    |               | Latin America and Caribbean                      | 5·6 (4·7–6·5)                              | -69·2% (-74·8 to -63%)                               | 1 (0·9–1·2)                               | -75·2% (-79·7 to -70·3%)                             | 0·69                     |      |
|                    |               | North Africa and Middle East                     | 6·3 (5·3–7·4)                              | -64·1% (-72·2 to -54·5%)                             | 1·2 (1–1·4)                               | -71·6% (-77·1 to -64·9%)                             | 0·88                     |      |
|                    |               | South Asia                                       | 55·5 (48·4–64·4)                           | -57·5% (-65 to -49%)                                 | 3·5 (3–4)                                 | -69% (-74 to -63·3%)                                 | 1·02                     |      |
|                    |               | Sub-Saharan Africa                               | 144·1 (117·3–175·5)                        | -17% (-32·2 to 3·7%)                                 | 14·3 (12·2–16·7)                          | -51·3% (-58·6 to -42%)                               | 0·81                     |      |
|                    |               | World Bank High Income                           | 4·1 (3·8–4·3)                              | -52·7% (-55 to -50·5%)                               | 0·3 (0·2–0·3)                             | -70·5% (-72·3 to -68·9%)                             | 0·73                     |      |
|                    |               | World Bank Upper Middle Income                   | 18·1 (16·5–19·8)                           | -73·3% (-77 to -69·3%)                               | 0·7 (0·6–0·8)                             | -78·3% (-81·4 to -75%)                               | 0·69                     |      |
|                    |               | World Bank Lower Middle Income                   | 132·5 (114–155·8)                          | -45·1% (-53·8 to -34·3%)                             | 4·5 (3·9–5·3)                             | -59·2% (-64·8 to -52·3%)                             | 0·90                     |      |
|                    |               | World Bank Low Income                            | 81·4 (66·9–99·1)                           | -29% (-42·3 to -12·6%)                               | 12·3 (10·5–14·5)                          | -55·8% (-62·5 to -47·5%)                             | 0·78                     |      |
|                    | Encephalitis  |                                                  | Global                                     | 89·9 (76·5–122·9)                                    | -23·7% (-38·9 to 12·9%)                   | 1·2 (1–1·6)                                          | -45·7% (-56·1 to -21·1%) | 0·84 |
|                    |               |                                                  | Southeast Asia, East Asia, and Oceania     | 11·1 (9·3–12·8)                                      | -40·1% (-53·8 to -5·5%)                   | 0·6 (0·5–0·7)                                        | -47·3% (-58·9 to -25·8%) | 0·73 |
|                    |               | Central Europe, Eastern Europe, and Central Asia | 3·7 (3·2–4·3)                              | -16·1% (-25·2 to 1·2%)                               | 0·9 (0·8–1)                               | -19% (-28·1 to -0·7%)                                | 0·72                     |      |
|                    |               | High-income                                      | 3·3 (2·6–3·5)                              | 79·8% (35·9 to 98·6%)                                | 0·2 (0·2–0·2)                             | 11·7% (-10·9 to 22·4%)                               | 0·77                     |      |
|                    |               | Latin America and Caribbean                      | 2·9 (2·4–3·5)                              | 3·9% (-13·6 to 25·4%)                                | 0·5 (0·4–0·6)                             | -21·4% (-34·6 to -5·8%)                              | 0·76                     |      |
|                    |               | North Africa and Middle East                     | 3·9 (3·1–5·1)                              | 26·2% (-9·4 to 71·2%)                                | 0·7 (0·6–0·9)                             | -24·9% (-42·7 to -1·9%)                              | 1·03                     |      |
|                    |               | South Asia                                       | 59·9 (48·6–90·5)                           | -29% (-46·2 to 12·5%)                                | 4·2 (3·4–6·2)                             | -52·9% (-63·7 to -27%)                               | 0·97                     |      |
|                    |               | Sub-Saharan Africa                               | 5 (4–6·7)                                  | 85·9% (40·5 to 132%)                                 | 0·6 (0·5–0·8)                             | -2·2% (-20 to 16·2%)                                 | 0·70                     |      |
|                    |               | World Bank High Income                           | 3·7 (3–3·9)                                | 54·1% (29·7 to 68·6%)                                | 0·2 (0·2–0·2)                             | -4·9% (-15·7 to 3%)                                  | 0·77                     |      |
|                    |               | World Bank Upper Middle Income                   | 10·5 (9·2–12·3)                            | -37·5% (-48·4 to -11·3%)                             | 0·4 (0·4–0·5)                             | -47·8% (-57·2 to -26·2%)                             | 0·78                     |      |

**Table S10** Global and regional burden, mortality, incidence, and prevalence of neurological conditions in different regions of the world

| Measure                                 | Region                                           | All Ages                  | Age-standardised                    |                          |                                     |                   |
|-----------------------------------------|--------------------------------------------------|---------------------------|-------------------------------------|--------------------------|-------------------------------------|-------------------|
|                                         |                                                  | Number (thousand)<br>2019 | Percent change<br>From 1990 to 2019 | Rate per 100 000<br>2019 | Percent change<br>From 1990 to 2019 | Sex ratio<br>2019 |
| Cause                                   |                                                  | Mean (95% UI)             | Mean (95% UI)                       | Mean (95% UI)            | Mean (95% UI)                       | F:M               |
| Tetanus                                 | World Bank Lower Middle Income                   | 70·6 (58·3–102·6)         | -25·5% (-41·9 to 14·9%)             | 2·8 (2·3–4)              | -47·2% (-58·4 to -21·7%)            | 0·90              |
|                                         | World Bank Low Income                            | 5·1 (4·2–6·1)             | 32·2% (-5·3 to 110·7%)              | 1 (0·8–1·2)              | -25% (-41·2 to 2·6%)                | 0·80              |
|                                         | Global                                           | 34·7 (25·9–48·5)          | -87·4% (-90·5 to -81·8%)            | 0·5 (0·4–0·7)            | -89·5% (-91·9 to -84·9%)            | 0·81              |
|                                         | Southeast Asia, East Asia, and Oceania           | 5·1 (2·7–6·4)             | -90% (-94·5 to -85·5%)              | 0·2 (0·1–0·3)            | -92·9% (-95·5 to -89·9%)            | 0·53              |
|                                         | Central Europe, Eastern Europe, and Central Asia | <0·1 (<0·1–0·1)           | -85·8% (-89·4 to -69·8%)            | <0·1 (<0·1–<0·1)         | -88·2% (-91·1 to -75·5%)            | 0·64              |
|                                         | High-income                                      | 0·1 (0–0·1)               | -79·9% (-84·1 to -59·1%)            | <0·1 (<0·1–<0·1)         | -88·6% (-90·9 to -76·8%)            | 0·69              |
|                                         | Latin America and Caribbean                      | 0·4 (0·3–0·8)             | -87·3% (-91·6 to -76·2%)            | 0·1 (0·1–0·1)            | -91·8% (-94·5 to -85·2%)            | 0·68              |
|                                         | North Africa and Middle East                     | 1·3 (0·8–2)               | -84·1% (-91·3 to -69%)              | 0·2 (0·2–0·4)            | -88·9% (-93·3 to -80·6%)            | 0·84              |
|                                         | South Asia                                       | 11·7 (8·3–16·1)           | -93·2% (-95·1 to -90·3%)            | 0·7 (0·5–1)              | -93·8% (-95·5 to -91·4%)            | 1·07              |
|                                         | Sub-Saharan Africa                               | 16 (11–25·2)              | -60·6% (-74·5 to -36·1%)            | 1·5 (0·9–2·4)            | -78·1% (-84·4 to -69·2%)            | 0·70              |
|                                         | World Bank High Income                           | 0·1 (0·1–0·2)             | -79·4% (-90·5 to -65%)              | <0·1 (<0·1–<0·1)         | -88·4% (-95·4 to -78·7%)            | 0·61              |
|                                         | World Bank Upper Middle Income                   | 1 (0·7–1·6)               | -95·7% (-96·9 to -92·5%)            | <0·1 (<0·1–0·1)          | -97% (-97·8 to -94·8%)              | 0·43              |
| Brain and central nervous system cancer | World Bank Lower Middle Income                   | 23·1 (16·4–30·7)          | -89·2% (-92·2 to -85·1%)            | 0·8 (0·6–1·1)            | -91·1% (-93·2 to -88%)              | 0·83              |
|                                         | World Bank Low Income                            | 10·4 (6·8–17·4)           | -72·5% (-82 to -48·1%)              | 1·5 (0·9–2·3)            | -83·1% (-88·1 to -74·3%)            | 0·71              |
|                                         | Global                                           | 246·3 (185·6–270·9)       | 76·4% (11 to 104·9%)                | 3 (2·3–3·4)              | -1·2% (-36·8 to 13·9%)              | 0·71              |
|                                         | Southeast Asia, East Asia, and Oceania           | 79·6 (58·7–93·5)          | 72·8% (15·7 to 116·3%)              | 3·1 (2·3–3·7)            | -6·2% (-37·2 to 15·4%)              | 0·75              |
|                                         | Central Europe, Eastern Europe, and Central Asia | 24·5 (17·6–28·2)          | 42·7% (-9·4 to 68%)                 | 4·4 (3·2–5·1)            | 17·4% (-24·9 to 37·6%)              | 0·64              |
|                                         | High-income                                      | 62·8 (42·5–69·2)          | 56·4% (-4·4 to 72·8%)               | 3·6 (2·5–3·9)            | -2·5% (-39 to 6·6%)                 | 0·65              |
|                                         | Latin America and Caribbean                      | 19·4 (12·6–22·7)          | 183% (37 to 269·4%)                 | 3·3 (2·1–3·9)            | 41·9% (-31 to 84·8%)                | 0·76              |
|                                         | North Africa and Middle East                     | 17·8 (12·1–20·9)          | 111·5% (30·3 to 173·4%)             | 3·7 (2·5–4·3)            | 3% (-33·4 to 30·2%)                 | 0·87              |
|                                         | South Asia                                       | 30·7 (23·9–36·8)          | 89·7% (17·9 to 154·8%)              | 1·9 (1·5–2·3)            | 7·3% (-29·6 to 33·9%)               | 0·70              |
|                                         | Sub-Saharan Africa                               | 11·4 (8–14)               | 141·1% (35·3 to 256·3%)             | 1·6 (1·1–1·9)            | 20·4% (-26·5 to 60·5%)              | 0·71              |
|                                         | World Bank High Income                           | 68·7 (46·7–75·6)          | 55·6% (-6·2 to 72·9%)               | 3·6 (2·5–3·9)            | -3·7% (-40·5 to 6%)                 | 0·65              |
|                                         | World Bank Upper Middle Income                   | 111·1 (81·1–126·4)        | 79·7% (14·3 to 113·4%)              | 3·5 (2·5–4)              | 0·6% (-36·4 to 19·5%)               | 0·75              |
| Stroke                                  | World Bank Lower Middle Income                   | 57·9 (44·3–66·1)          | 95·4% (23·6 to 143·8%)              | 2·1 (1·6–2·4)            | 8·4% (-26·6 to 29·9%)               | 0·74              |
|                                         | World Bank Low Income                            | 8·5 (6·1–10·6)            | 112·4% (24·3 to 218·2%)             | 1·8 (1·3–2·2)            | 11·4% (-30·4 to 51·9%)              | 0·72              |
|                                         | Global                                           | 6552·7 (5995·2–7015·1)    | 43·3% (31 to 55·4%)                 | 84·2 (76·8–90·2)         | -36·4% (-41·6 to -31·2%)            | 0·76              |
|                                         | Southeast Asia, East Asia, and Oceania           | 2999·6 (2667·7–3332·5)    | 68·8% (42·6 to 94·2%)               | 129·4 (114·8–143·6)      | -34·5% (-45 to -24·7%)              | 0·64              |
|                                         | Central Europe, Eastern Europe, and Central Asia | 761·7 (691·2–817·9)       | -1·7% (-8·5 to 4·9%)                | 121·6 (110·2–130·6)      | -33·5% (-37·9 to -29·2%)            | 0·78              |
|                                         | High-income                                      | 816·8 (697·4–887·7)       | -8% (-15·7 to -2·9%)                | 32·1 (28·1–34·6)         | -56·6% (-59·2 to -54·5%)            | 0·82              |
|                                         | Latin America and Caribbean                      | 281·7 (252·9–304·8)       | 44·3% (32·7 to 55·9%)               | 50·1 (44·8–54·2)         | -49·3% (-53·1 to -45·4%)            | 0·82              |
|                                         | North Africa and Middle East                     | 312·2 (278·4–349·7)       | 75·5% (56·2 to 98·8%)               | 87·7 (78·2–97·6)         | -27·8% (-35·4 to -16%)              | 1·07              |
|                                         | South Asia                                       | 978·9 (864·8–1095·4)      | 86·9% (57·8 to 116·7%)              | 80·2 (70·9–89·7)         | -32·6% (-43·7 to -20·5%)            | 0·87              |
|                                         | Sub-Saharan Africa                               | 401·8 (353·1–455·4)       | 69·3% (48·3 to 93·6%)               | 106·7 (94·2–120)         | -18·3% (-28 to -8%)                 | 0·94              |
|                                         | World Bank High Income                           | 915·3 (786·2–989·5)       | -8·7% (-15·8 to -3·7%)              | 34·2 (29·8–36·8)         | -56·5% (-58·9 to -54·4%)            | 0·82              |
|                                         | World Bank Upper Middle Income                   | 3235·7 (2883·7–3569·7)    | 45·8% (26·8 to 64·6%)               | 106·8 (94·9–117·8)       | -40·6% (-47·9 to -33·2%)            | 0·68              |



**Table S10** Global and regional burden, mortality, incidence, and prevalence of neurological conditions in different regions of the world

| Measure                        | Cause                                            | Region                 | All Ages                 |                          | Age-standardised         |                   | Sex ratio<br>2019<br>F:M |
|--------------------------------|--------------------------------------------------|------------------------|--------------------------|--------------------------|--------------------------|-------------------|--------------------------|
|                                |                                                  |                        | Number (thousand)        | Percent change           | Rate per 100 000         | Percent change    |                          |
|                                |                                                  |                        | 2019                     | From 1990 to 2019        | 2019                     | From 1990 to 2019 |                          |
|                                |                                                  | Mean (95% UI)          | Mean (95% UI)            | Mean (95% UI)            | Mean (95% UI)            |                   |                          |
| Ischaemic stroke               | World Bank Lower Middle Income                   | 2076.8 (1908.6–2248.7) | 78.5% (58.8 to 99.7%)    | 103.6 (94.9–111.9)       | -26.4% (-34.6 to -17%)   | 0.89              |                          |
|                                | World Bank Low Income                            | 321.5 (273.1–372.2)    | 71.6% (51.9 to 94%)      | 122.8 (104.7–141.2)      | -17.6% (-26.3 to -7.8%)  | 0.92              |                          |
|                                | Global                                           | 3293.4 (2973.5–3536.1) | 60.7% (45.8 to 74.7%)    | 43.5 (39.1–46.8)         | -33.6% (-39.2 to -28.2%) | 0.81              |                          |
|                                | Southeast Asia, East Asia, and Oceania           | 1357.9 (1194.3–1519)   | 168.6% (110.6 to 216.8%) | 61.8 (54.2–69)           | -3.1% (-24.2 to 14.4%)   | 0.65              |                          |
|                                | Central Europe, Eastern Europe, and Central Asia | 546.1 (490.7–589.3)    | -0.8% (-8.9 to 6.7%)     | 86.7 (77.8–93.6)         | -35% (-39.9 to -30.2%)   | 0.85              |                          |
|                                | High-income                                      | 517.3 (433.6–567.5)    | -13.2% (-21.1 to -7.7%)  | 18.9 (16–20.6)           | -61.9% (-64.6 to -59.8%) | 0.87              |                          |
|                                | Latin America and Caribbean                      | 149 (129.8–162)        | 60.3% (44.3 to 76.2%)    | 27.3 (23.7–29.7)         | -48.9% (-53.5 to -44%)   | 0.82              |                          |
|                                | North Africa and Middle East                     | 210.1 (187.1–234)      | 141.8% (110.1 to 175%)   | 62.9 (56.3–69.9)         | -9.1% (-20.7 to 4%)      | 1.10              |                          |
|                                | South Asia                                       | 377.8 (321.5–443.3)    | 144.2% (95.6 to 196.6%)  | 35.2 (30–40.9)           | -22.8% (-37.9 to -4.8%)  | 0.84              |                          |
|                                | Sub-Saharan Africa                               | 135.1 (118.3–155.8)    | 113.6% (82.2 to 143.5%)  | 43.5 (38.3–49.3)         | -0.5% (-14.8 to 13.3%)   | 1.07              |                          |
|                                | World Bank High Income                           | 589.9 (496.3–644.6)    | -12.7% (-20.3 to -7.6%)  | 20.6 (17.5–22.4)         | -61% (-63.6 to -59%)     | 0.88              |                          |
| World Bank Upper Middle Income | 1708.2 (1522.4–1878.2)                           | 89.5% (64.2 to 111.8%) | 58.3 (51.8–64)           | -28.4% (-37.8 to -20.3%) | 0.74                     |                   |                          |
| Intracerebral haemorrhage      | World Bank Lower Middle Income                   | 888.5 (792.1–984)      | 109.3% (80.8 to 139.2%)  | 50.3 (44.9–55.3)         | -20.4% (-30.4 to -8.5%)  | 0.93              |                          |
|                                | World Bank Low Income                            | 105.2 (88.4–125.1)     | 122.9% (95.1 to 152.2%)  | 47.4 (39.5–56.1)         | 0% (-11.9 to 12.7%)      | 0.97              |                          |
|                                | Global                                           | 2886.2 (2644.5–3099.4) | 37.5% (21.7 to 50.9%)    | 36 (33–38.7)             | -35.6% (-42.8 to -29.2%) | 0.70              |                          |
|                                | Southeast Asia, East Asia, and Oceania           | 1511.6 (1346.2–1680.8) | 47.3% (23.3 to 70.6%)    | 62.3 (55.5–69.3)         | -42.7% (-52.4 to -34.2%) | 0.63              |                          |
|                                | Central Europe, Eastern Europe, and Central Asia | 180 (163.5–194.2)      | -8.4% (-17.1 to 0.5%)    | 29 (26.3–31.3)           | -33.2% (-39.4 to -26.6%) | 0.62              |                          |
|                                | High-income                                      | 228.9 (202.4–246.9)    | -2.9% (-10.6 to 3.2%)    | 9.9 (8.9–10.6)           | -49.9% (-53.1 to -47.1%) | 0.68              |                          |
|                                | Latin America and Caribbean                      | 102.3 (93.1–112.1)     | 20.5% (9.4 to 33.1%)     | 17.7 (16–19.3)           | -54.4% (-58.5 to -49.6%) | 0.73              |                          |
|                                | North Africa and Middle East                     | 88.5 (77.9–101.1)      | 18% (1.5 to 37.8%)       | 21.6 (19–24.3)           | -51.4% (-58.1 to -41.3%) | 0.99              |                          |
|                                | South Asia                                       | 521.3 (442.8–608.6)    | 65.4% (38.3 to 92.8%)    | 39.3 (33.2–45.8)         | -38.2% (-48.2 to -27.7%) | 0.90              |                          |
|                                | Sub-Saharan Africa                               | 253.6 (217.3–292.8)    | 52.6% (32.8 to 75.3%)    | 60.6 (52.2–69.8)         | -27.4% (-36.4 to -16.8%) | 0.87              |                          |
|                                | World Bank High Income                           | 251 (222–271)          | -5.9% (-13.1 to 0.3%)    | 10.2 (9.2–11)            | -50.8% (-53.9 to -48.2%) | 0.67              |                          |
| World Bank Upper Middle Income | 1368.2 (1210.1–1529.7)                           | 30% (9.4 to 49.6%)     | 43.5 (38.4–48.5)         | -45.1% (-54.1 to -37%)   | 0.60                     |                   |                          |
| Subarachnoid haemorrhage       | World Bank Lower Middle Income                   | 1063.8 (949–1176.1)    | 63.9% (43.3 to 83.4%)    | 48.1 (42.9–53.2)         | -30.4% (-39.5 to -21.5%) | 0.86              |                          |
|                                | World Bank Low Income                            | 201.6 (171.5–236.4)    | 54.7% (35.6 to 77.6%)    | 70.9 (59.8–82.7)         | -25.5% (-33.8 to -15.5%) | 0.90              |                          |
|                                | Global                                           | 373.1 (330–415.9)      | -12.1% (-25.3 to 26.3%)  | 4.7 (4.1–5.2)            | -57.4% (-63.8 to -38.8%) | 0.86              |                          |
|                                | Southeast Asia, East Asia, and Oceania           | 130.1 (106.1–156.5)    | -46.9% (-61.4 to -1.5%)  | 5.3 (4.3–6.3)            | -79% (-84.7 to -61.9%)   | 0.67              |                          |
|                                | Central Europe, Eastern Europe, and Central Asia | 35.6 (31.7–38.9)       | 27.7% (10.3 to 49.8%)    | 5.9 (5.3–6.5)            | -4.3% (-17.5 to 12.3%)   | 0.74              |                          |
|                                | High-income                                      | 70.6 (62.9–75.2)       | 24.8% (14.7 to 32.9%)    | 3.4 (3.1–3.6)            | -31.3% (-35.8 to -27.2%) | 1.04              |                          |
|                                | Latin America and Caribbean                      | 30.5 (27.2–33.7)       | 75.7% (53.1 to 99.5%)    | 5.1 (4.6–5.7)            | -23.2% (-34.3 to -12.2%) | 1.29              |                          |
|                                | North Africa and Middle East                     | 13.6 (11.2–16.8)       | -15% (-35.7 to 38.8%)    | 3.2 (2.6–3.9)            | -59% (-70.7 to -31.6%)   | 1.05              |                          |
|                                | South Asia                                       | 79.7 (48.6–110.2)      | 47.8% (13.8 to 152.9%)   | 5.6 (3.4–7.8)            | -42% (-56 to -1.4%)      | 0.96              |                          |
|                                | Sub-Saharan Africa                               | 13.1 (7.2–27.5)        | 64.6% (31.7 to 128.1%)   | 2.6 (1.3–5.4)            | -24.7% (-38.1 to -1.5%)  | 0.63              |                          |
|                                | World Bank High Income                           | 74.4 (66.3–79)         | 24.6% (14.8 to 32.7%)    | 3.3 (3–3.5)              | -31.6% (-36 to -27.5%)   | 1.03              |                          |
| World Bank Upper Middle Income | 159.3 (134.3–184.6)                              | -39.8% (-53 to 1.8%)   | 5 (4.2–5.8)              | -73.8% (-79.6 to -55.7%) | 0.77                     |                   |                          |

**Table S10** Global and regional burden, mortality, incidence, and prevalence of neurological conditions in different regions of the world

| Measure                                 | Region                                           | All Ages                  | Age-standardised                    |                          |                                     |                   |
|-----------------------------------------|--------------------------------------------------|---------------------------|-------------------------------------|--------------------------|-------------------------------------|-------------------|
|                                         |                                                  | Number (thousand)<br>2019 | Percent change<br>From 1990 to 2019 | Rate per 100 000<br>2019 | Percent change<br>From 1990 to 2019 | Sex ratio<br>2019 |
| Cause                                   |                                                  | Mean (95% UI)             | Mean (95% UI)                       | Mean (95% UI)            | Mean (95% UI)                       | F:M               |
| Neurological disorders*                 | World Bank Lower Middle Income                   | 124.5 (89.7–161.8)        | 37.9% (8.4 to 111.7%)               | 5.2 (3.8–6.8)            | -38.6% (-52.3 to -6.4%)             | 0.92              |
|                                         | World Bank Low Income                            | 14.7 (7.9–28.5)           | 49.3% (19.6 to 99.1%)               | 4.5 (2.4–8.5)            | -31.4% (-44.3 to -9.7%)             | 0.79              |
|                                         | Global                                           | 2221.3 (1027.9–4759.8)    | 154.3% (120.5 to 174.1%)            | 30.7 (13.8–66.3)         | 1.2% (-2.8 to 7.7%)                 | 0.98              |
|                                         | Southeast Asia, East Asia, and Oceania           | 564.2 (238.2–1246.4)      | 176.5% (117 to 224.4%)              | 29.3 (11.8–66.4)         | -4.1% (-16.3 to 10%)                | 1.04              |
|                                         | Central Europe, Eastern Europe, and Central Asia | 175.9 (76.9–395)          | 77.2% (61.4 to 88.9%)               | 29.6 (13–65.3)           | 4.4% (-1.1 to 11.2%)                | 0.90              |
|                                         | High-income                                      | 839.7 (375.2–1778.7)      | 149.4% (137.2 to 159.6%)            | 31.4 (15–64.8)           | 5.5% (0 to 12%)                     | 0.96              |
|                                         | Latin America and Caribbean                      | 172.3 (76.9–368)          | 229.3% (181.8 to 258%)              | 31.7 (14–67.9)           | 0.3% (-6 to 8.6%)                   | 0.91              |
|                                         | North Africa and Middle East                     | 99.6 (47.3–213.2)         | 153.3% (111 to 207.8%)              | 33.2 (14.3–73.9)         | -2.8% (-9.6 to 13.9%)               | 1.01              |
|                                         | South Asia                                       | 265.3 (143–544.5)         | 174% (99.4 to 254%)                 | 27.7 (13.1–60.5)         | 3.3% (-11.8 to 19.5%)               | 0.98              |
|                                         | Sub-Saharan Africa                               | 104.2 (57.1–209.1)        | 132.5% (98.1 to 164.1%)             | 34 (14.7–77)             | 9.1% (-0.1 to 20.1%)                | 0.98              |
| Alzheimer's disease and other dementias | World Bank High Income                           | 887.8 (396.8–1884.5)      | 147.5% (134.8 to 157.8%)            | 31.4 (14.9–65)           | 4.8% (-0.5 to 11%)                  | 0.97              |
|                                         | World Bank Upper Middle Income                   | 795.5 (342.3–1750.7)      | 168.8% (118.6 to 204.3%)            | 29.9 (12.4–66.5)         | -3% (-11.6 to 6.7%)                 | 0.97              |
|                                         | World Bank Lower Middle Income                   | 466.9 (241.4–974)         | 149.4% (102.9 to 193.4%)            | 29.4 (13.3–64.1)         | 3.3% (-5.1 to 17.9%)                | 1.00              |
|                                         | World Bank Low Income                            | 69.9 (37.4–141.1)         | 126.3% (84.5 to 160.6%)             | 33.2 (14.3–75.2)         | 4.3% (-5.4 to 14.2%)                | 0.99              |
|                                         | Global                                           | 1623.3 (407.5–4205.7)     | 189.4% (173.5 to 214.5%)            | 22.9 (5.8–59.2)          | 3% (-1.2 to 9.8%)                   | 1.17              |
|                                         | Southeast Asia, East Asia, and Oceania           | 428.7 (102.7–1121)        | 231.2% (191.3 to 292%)              | 23.3 (5.6–60.8)          | 0.5% (-10.8 to 19%)                 | 1.25              |
|                                         | Central Europe, Eastern Europe, and Central Asia | 133.1 (32.4–356.7)        | 90.8% (78.4 to 106.9%)              | 22.2 (5.5–58.7)          | 3.9% (-1.3 to 10.6%)                | 1.05              |
|                                         | High-income                                      | 642.2 (167.9–1599.7)      | 163.2% (145.2 to 187.1%)            | 22.5 (5.8–56.7)          | 3.2% (-1.4 to 9.9%)                 | 1.19              |
|                                         | Latin America and Caribbean                      | 129.4 (32.7–331.5)        | 278.9% (251.7 to 319.2%)            | 24 (6.1–61.6)            | 0.5% (-5.3 to 9.2%)                 | 1.03              |
|                                         | North Africa and Middle East                     | 70.5 (17.2–185.8)         | 191.6% (169.8 to 253.2%)            | 25.5 (6.3–67.1)          | -2.3% (-9 to 17.3%)                 | 1.12              |
| Parkinson's disease                     | South Asia                                       | 158.1 (37.7–437.1)        | 335.4% (282.5 to 409.4%)            | 19.2 (4.6–52.1)          | 14.1% (1 to 33%)                    | 1.07              |
|                                         | Sub-Saharan Africa                               | 61.2 (15.2–166.3)         | 165% (144.8 to 189.5%)              | 25.5 (6.3–69.1)          | 11.9% (4.2 to 22.9%)                | 1.16              |
|                                         | World Bank High Income                           | 679 (177.2–1694.8)        | 162.1% (144.5 to 185.4%)            | 22.6 (5.8–56.9)          | 2.9% (-1.8 to 9.2%)                 | 1.19              |
|                                         | World Bank Upper Middle Income                   | 604.4 (149.1–1576.6)      | 217.3% (189.2 to 259.8%)            | 23.3 (5.7–60.3)          | 0.6% (-7.3 to 12.1%)                | 1.14              |
|                                         | World Bank Lower Middle Income                   | 297.3 (72.4–811.7)        | 209.8% (186.2 to 253.8%)            | 21.4 (5.1–56.2)          | 6.3% (-1.7 to 22%)                  | 1.13              |
|                                         | World Bank Low Income                            | 41.8 (10.4–113.7)         | 177% (154.5 to 205.2%)              | 25.2 (6.3–67.8)          | 8.6% (-0.1 to 19.9%)                | 1.17              |
|                                         | Global                                           | 362.9 (326.9–388.2)       | 146.5% (128.1 to 162.8%)            | 4.8 (4.3–5.1)            | 3.8% (-3.3 to 10.1%)                | 0.53              |
|                                         | Southeast Asia, East Asia, and Oceania           | 103.4 (90.2–114.9)        | 152.4% (116.1 to 190.8%)            | 4.7 (4.1–5.3)            | -10.9% (-23.1 to 2.1%)              | 0.51              |
|                                         | Central Europe, Eastern Europe, and Central Asia | 28.1 (25.3–30.3)          | 63% (51.9 to 75.8%)                 | 4.4 (4–4.7)              | 7% (0.1 to 15.3%)                   | 0.55              |
|                                         | High-income                                      | 120.1 (105.1–128.2)       | 133.2% (119.5 to 141.6%)            | 4.7 (4.1–5)              | 13.4% (8.6 to 16.9%)                | 0.45              |
| Latin America and Caribbean             | 24.8 (21.9–27.2)                                 | 228.8% (204.2 to 256.4%)  | 4.6 (4–5)                           | 3.6% (-3.8 to 12%)       | 0.61                                |                   |



**Table S10** Global and regional burden, mortality, incidence, and prevalence of neurological conditions in different regions of the world

| Measure                                          | Region                                           | All Ages                  | Age-standardised                    |                          | Sex ratio<br>2019        |                                     |
|--------------------------------------------------|--------------------------------------------------|---------------------------|-------------------------------------|--------------------------|--------------------------|-------------------------------------|
|                                                  |                                                  | Number (thousand)<br>2019 | Percent change<br>From 1990 to 2019 | Rate per 100 000<br>2019 |                          | Percent change<br>From 1990 to 2019 |
| Cause                                            |                                                  | Mean (95% UI)             | Mean (95% UI)                       | Mean (95% UI)            | Mean (95% UI)            | F:M                                 |
| Idiopathic epilepsy                              | North Africa and Middle East                     | 16·8 (14·6–21·6)          | 179·4% (145·9 to 225·5%)            | 5·3 (4·6–6·9)            | 2·3% (-10 to 19%)        | 0·66                                |
|                                                  | South Asia                                       | 55 (47·4–63·6)            | 208·7% (153·2 to 271%)              | 5·2 (4·4–6)              | -2·9% (-19·8 to 16·2%)   | 0·65                                |
|                                                  | Sub-Saharan Africa                               | 14·7 (13–17·5)            | 139% (105·8 to 174·5%)              | 4·9 (4·3–5·9)            | 11·3% (-3·5 to 27·3%)    | 0·67                                |
|                                                  | World Bank High Income                           | 126·9 (111·6–135·5)       | 130·7% (116·6 to 139·2%)            | 4·7 (4·1–4·9)            | 12·4% (7·4 to 16·1%)     | 0·45                                |
|                                                  | World Bank Upper Middle Income                   | 134·4 (119·8–147·2)       | 145·2% (117·3 to 173%)              | 4·6 (4·1–5)              | -7·7% (-17·5 to 1·8%)    | 0·53                                |
|                                                  | World Bank Lower Middle Income                   | 91·1 (81·9–100·7)         | 178% (137·6 to 213·6%)              | 5·2 (4·7–5·8)            | 7·5% (-7·5 to 20·8%)     | 0·65                                |
|                                                  | World Bank Low Income                            | 10·2 (8·8–12·4)           | 125·4% (96·9 to 154·6%)             | 4·7 (4·1–5·9)            | 0·8% (-10·9 to 13·2%)    | 0·62                                |
|                                                  | Global                                           | 114 (100·2–129·9)         | 13·9% (-1·4 to 51·6%)               | 1·5 (1·3–1·7)            | -24·8% (-34·2 to -1·6%)  | 0·71                                |
|                                                  | Southeast Asia, East Asia, and Oceania           | 16·7 (14·5–19·5)          | -27·7% (-40·5 to -6·4%)             | 0·7 (0·6–0·8)            | -48·1% (-57·1 to -32·9%) | 0·56                                |
|                                                  | Central Europe, Eastern Europe, and Central Asia | 6·3 (5·7–6·9)             | 5·8% (-3·2 to 15·2%)                | 1·4 (1·2–1·5)            | -0·8% (-9·5 to 8·6%)     | 0·53                                |
|                                                  | High-income                                      | 14·3 (11·8–15·3)          | 61·2% (26·5 to 71·8%)               | 0·9 (0·8–0·9)            | -0·3% (-17·2 to 4·7%)    | 0·69                                |
|                                                  | Latin America and Caribbean                      | 9·1 (8·2–10·3)            | 28·4% (13 to 49·4%)                 | 1·5 (1·4–1·7)            | -23·8% (-32·6 to -12·1%) | 0·60                                |
|                                                  | North Africa and Middle East                     | 6·6 (5·4–7·6)             | 5·3% (-16·7 to 70·4%)               | 1·2 (1–1·4)              | -33·4% (-46·2 to 2·1%)   | 0·88                                |
|                                                  | South Asia                                       | 39·5 (31·8–47·5)          | 7·9% (-14·4 to 67·1%)               | 2·5 (2–3)                | -36·8% (-48·4 to -9·3%)  | 1·11                                |
|                                                  | Sub-Saharan Africa                               | 21·5 (17·7–27·5)          | 76·4% (38·1 to 160%)                | 2·7 (2·2–3·4)            | -13·5% (-28·6 to 16·2%)  | 0·39                                |
| World Bank High Income                           | 16·6 (13·8–17·7)                                 | 59·2% (27·6 to 70·3%)     | 0·9 (0·8–1)                         | -0·2% (-15·5 to 6·3%)    | 0·66                     |                                     |
| World Bank Upper Middle Income                   | 27 (24·4–30·1)                                   | -18·3% (-29·2 to 0·1%)    | 1 (0·9–1·1)                         | -40·8% (-48·4 to -27·5%) | 0·59                     |                                     |
| World Bank Lower Middle Income                   | 56·2 (46·1–68·9)                                 | 18·5% (-3·9 to 79·6%)     | 2 (1·6–2·5)                         | -28·2% (-40·3 to 2·3%)   | 0·87                     |                                     |
| World Bank Low Income                            | 14·2 (12–17·1)                                   | 55·6% (22·8 to 138%)      | 2·6 (2·2–3·1)                       | -19·1% (-33 to 8·9%)     | 0·47                     |                                     |
| Global                                           | 22·4 (20·2–27·8)                                 | 68% (40·1 to 84%)         | 0·3 (0·2–0·3)                       | -14% (-29·1 to -5·9%)    | 1·35                     |                                     |
| Southeast Asia, East Asia, and Oceania           | 2·7 (2·2–3·6)                                    | 59·9% (20·4 to 138·3%)    | 0·1 (0·1–0·1)                       | -22·5% (-40·9 to 13·7%)  | 0·84                     |                                     |
| Central Europe, Eastern Europe, and Central Asia | 2·7 (2·4–9)                                      | -5·5% (-25·7 to 42%)      | 0·5 (0·4–0·9)                       | -23% (-40·1 to 18%)      | 1·26                     |                                     |
| High-income                                      | 10·6 (7·6–12·5)                                  | 68·5% (7·7 to 92·8%)      | 0·6 (0·4–0·7)                       | 5·1% (-29·9 to 18·3%)    | 1·58                     |                                     |
| Latin America and Caribbean                      | 1·2 (1–1·5)                                      | 187·4% (110·3 to 238%)    | 0·2 (0·2–0·2)                       | 20·2% (-12·4 to 41·3%)   | 1·19                     |                                     |
| North Africa and Middle East                     | 1·4 (1·2–1·8)                                    | 147·3% (83·1 to 248%)     | 0·3 (0·2–0·3)                       | 5·1% (-25 to 47·6%)      | 1·21                     |                                     |
| South Asia                                       | 2·9 (2·4–3·7)                                    | 145% (84 to 267·6%)       | 0·2 (0·2–0·2)                       | 8·2% (-18·3 to 64·4%)    | 1·26                     |                                     |
| Sub-Saharan Africa                               | 1 (0·8–1·3)                                      | 167·9% (95·7 to 264%)     | 0·2 (0·1–0·2)                       | 15·7% (-12·7 to 58·1%)   | 1·49                     |                                     |
| World Bank High Income                           | 11·4 (8·5–13·8)                                  | 60·1% (6·1 to 80·7%)      | 0·6 (0·4–0·7)                       | -1% (-31·8 to 10·2%)     | 1·58                     |                                     |
| World Bank Upper Middle Income                   | 5·3 (4·5–7·3)                                    | 48·5% (24·5 to 87·4%)     | 0·2 (0·1–0·2)                       | -24·6% (-36·7 to -5·1%)  | 1·08                     |                                     |
| World Bank Lower Middle Income                   | 5·1 (4·3–6·6)                                    | 113·7% (73·4 to 180·8%)   | 0·2 (0·2–0·2)                       | -1·1% (-18·8 to 30·6%)   | 1·20                     |                                     |
| World Bank Low Income                            | 0·6 (0·4–0·9)                                    | 132·6% (76·7 to 204·5%)   | 0·2 (0·1–0·2)                       | 4·3% (-18·4 to 37%)      | 1·36                     |                                     |
| Global                                           | 39·1 (36·6–41·1)                                 | 121·4% (108 to 135·4%)    | 0·5 (0·4–0·5)                       | 12·4% (5·7 to 19·3%)     | 0·70                     |                                     |
| Southeast Asia, East Asia, and Oceania           | 3·6 (3·1–4·1)                                    | 24·2% (3·6 to 47·5%)      | 0·1 (0·1–0·2)                       | -31·9% (-43 to -19·9%)   | 0·59                     |                                     |
| Central Europe, Eastern Europe, and Central Asia | 1·8 (1·6–2)                                      | 149·4% (106·9 to 187·1%)  | 0·3 (0·3–0·3)                       | 90·2% (59·5 to 118%)     | 0·67                     |                                     |
| High-income                                      | 27·5 (25·5–29)                                   | 127·3% (114·8 to 138·2%)  | 1·4 (1·3–1·4)                       | 30·6% (24·1 to 36·4%)    | 0·70                     |                                     |
| Latin America and Caribbean                      | 2·9 (2·6–3·2)                                    | 354·4% (296·6 to 404%)    | 0·5 (0·4–0·5)                       | 99·8% (74·8 to 120·8%)   | 0·72                     |                                     |
| Motor neuron disease                             |                                                  |                           |                                     |                          |                          |                                     |

**Table S10** Global and regional burden, mortality, incidence, and prevalence of neurological conditions in different regions of the world

| Measure                      | Cause                 | Region                                           | All Ages               |                          | Age-standardised         |                          | Sex ratio<br>2019<br>F:M |
|------------------------------|-----------------------|--------------------------------------------------|------------------------|--------------------------|--------------------------|--------------------------|--------------------------|
|                              |                       |                                                  | Number (thousand)      | Percent change           | Rate per 100 000         | Percent change           |                          |
|                              |                       |                                                  | 2019                   | From 1990 to 2019        | 2019                     | From 1990 to 2019        |                          |
|                              |                       | Mean (95% UI)                                    | Mean (95% UI)          | Mean (95% UI)            | Mean (95% UI)            |                          |                          |
| Other neurological disorders |                       | North Africa and Middle East                     | 1.1 (0.9–1.3)          | 90.4% (23.9 to 177.6%)   | 0.2 (0.2–0.3)            | 9.3% (-26.7 to 51.1%)    | 0.73                     |
|                              |                       | South Asia                                       | 1.9 (1.5–2.4)          | 234.9% (165.3 to 323.9%) | 0.1 (0.1–0.2)            | 54.3% (19 to 102%)       | 0.76                     |
|                              |                       | Sub-Saharan Africa                               | 0.2 (0.2–0.3)          | 73.2% (28.3 to 126.4%)   | <0.1 (<0.1–<0.1)         | -23.5% (-44.5 to 3.7%)   | 0.87                     |
|                              |                       | World Bank High Income                           | 28.1 (26–29.7)         | 127% (114.4 to 138.3%)   | 1.3 (1.2–1.4)            | 29.9% (23.3 to 36%)      | 0.71                     |
|                              |                       | World Bank Upper Middle Income                   | 7.7 (7–8.3)            | 88.5% (65.6 to 114.8%)   | 0.2 (0.2–0.3)            | 4.5% (-7.9 to 18.4%)     | 0.66                     |
|                              |                       | World Bank Lower Middle Income                   | 3.1 (2.6–3.5)          | 189.1% (137.2 to 247.4%) | 0.1 (0.1–0.1)            | 40.8% (12.7 to 73%)      | 0.72                     |
|                              |                       | World Bank Low Income                            | 0.2 (0.2–0.3)          | 67.4% (27.5 to 109.9%)   | 0.1 (0–0.1)              | -11% (-32.2 to 12.2%)    | 0.86                     |
|                              |                       | Global                                           | 59.6 (55.1–64.6)       | 74.8% (59.5 to 91.6%)    | 0.8 (0.7–0.8)            | -0.2% (-8.2 to 9.2%)     | 0.74                     |
|                              |                       | Southeast Asia, East Asia, and Oceania           | 9.1 (7.9–10.4)         | 53.1% (27.7 to 84.3%)    | 0.4 (0.3–0.4)            | -4.5% (-19.9 to 14.7%)   | 0.62                     |
|                              |                       | Central Europe, Eastern Europe, and Central Asia | 3.9 (3.6–4.2)          | 42.9% (30.9 to 54.5%)    | 0.8 (0.7–0.8)            | 19.7% (9.7 to 29.6%)     | 0.62                     |
|                              |                       | High-income                                      | 24.9 (23–26)           | 78.6% (70.9 to 85%)      | 1.3 (1.3–1.4)            | 3.2% (0.3 to 6.4%)       | 0.68                     |
|                              |                       | Latin America and Caribbean                      | 4.9 (4.5–5.4)          | 99.5% (82 to 119.2%)     | 0.8 (0.8–0.9)            | 3.1% (-5.7 to 12.9%)     | 0.69                     |
|                              |                       | North Africa and Middle East                     | 3.3 (2.9–3.8)          | 85.9% (42.8 to 136.2%)   | 0.7 (0.6–0.8)            | 17.4% (-7.9 to 49.9%)    | 0.67                     |
|                              |                       | South Asia                                       | 7.9 (5.9–10.6)         | 80.9% (51 to 141.8%)     | 0.5 (0.4–0.7)            | 11.2% (-11.6 to 46.3%)   | 1.15                     |
|                              |                       | Sub-Saharan Africa                               | 5.6 (4.6–6.9)          | 94% (42.6 to 152.9%)     | 0.7 (0.6–0.8)            | 4.2% (-18.3 to 31.3%)    | 0.86                     |
|                              |                       | World Bank High Income                           | 25.8 (23.9–26.9)       | 75.2% (67.8 to 81.6%)    | 1.3 (1.2–1.3)            | 1% (-2 to 4.3%)          | 0.68                     |
|                              |                       | World Bank Upper Middle Income                   | 16.6 (15.3–18)         | 68.1% (50.2 to 89.1%)    | 0.6 (0.5–0.6)            | 5.6% (-5.5 to 18.4%)     | 0.66                     |
|                              |                       | World Bank Lower Middle Income                   | 14.2 (11.4–17.8)       | 85.2% (51.2 to 129.4%)   | 0.5 (0.4–0.6)            | 14.1% (-7.3 to 41.9%)    | 0.95                     |
|                              | World Bank Low Income | 3 (2.4–3.6)                                      | 64% (26.7 to 115.9%)   | 0.5 (0.4–0.6)            | -5.1% (-23.5 to 19.8%)   | 0.85                     |                          |
| <b>Incidence</b>             |                       |                                                  |                        |                          |                          |                          |                          |
| Meningitis                   |                       | Global                                           | 2507.2 (2113.1–2988.7) | -23.8% (-26.5 to -20.4%) | 35.4 (29.6–42.5)         | -35.9% (-37 to -34.6%)   | 0.92                     |
|                              |                       | Southeast Asia, East Asia, and Oceania           | 177.1 (146.7–211.8)    | -60.9% (-63.5 to -57.6%) | 10.9 (8.8–13.3)          | -57.6% (-59.3 to -55.3%) | 0.75                     |
|                              |                       | Central Europe, Eastern Europe, and Central Asia | 70.8 (57–86)           | -45.7% (-48.6 to -42.5%) | 20.9 (16.6–25.6)         | -39.2% (-43.1 to -35.5%) | 0.79                     |
|                              |                       | High-income                                      | 96 (78.2–113.9)        | -41.5% (-45.2 to -37%)   | 10.8 (8.7–13.1)          | -49.1% (-51.2 to -46.5%) | 0.85                     |
|                              |                       | Latin America and Caribbean                      | 93 (76–110.9)          | -33.5% (-39.8 to -25.8%) | 16.8 (13.7–20)           | -46.3% (-49.9 to -42.3%) | 0.86                     |
|                              |                       | North Africa and Middle East                     | 128.5 (106.7–152.7)    | -9.9% (-16.3 to -1.9%)   | 22.5 (18.9–26.4)         | -37% (-39.9 to -33.9%)   | 1.12                     |
|                              |                       | South Asia                                       | 741.6 (610.3–883.3)    | -35.3% (-38.7 to -31.2%) | 43.6 (36.2–52.3)         | -49.2% (-50.7 to -47.5%) | 1.04                     |
|                              |                       | Sub-Saharan Africa                               | 1200.1 (997.8–1452)    | 7.8% (4.8 to 11.2%)      | 96.3 (82.6–111.7)        | -42.4% (-43.4 to -41.5%) | 0.87                     |
|                              |                       | World Bank High Income                           | 108.3 (87.9–128.8)     | -39.9% (-43.6 to -35.3%) | 11.1 (8.9–13.6)          | -47.1% (-48.9 to -44.6%) | 0.85                     |
|                              |                       | World Bank Upper Middle Income                   | 262.9 (216.8–311.1)    | -51% (-55.1 to -45.9%)   | 12 (9.8–14.4)            | -52% (-54.7 to -48.6%)   | 0.89                     |
|                              |                       | World Bank Lower Middle Income                   | 1400.3 (1163.6–1685.8) | -24.6% (-27.3 to -21.1%) | 44.8 (37.4–53.8)         | -42.6% (-43.8 to -41.4%) | 0.96                     |
|                              | World Bank Low Income | 734.4 (615.3–878.6)                              | 2.9% (-0.9 to 6.8%)    | 90.2 (77.6–103.6)        | -43.5% (-44.8 to -42.3%) | 0.86                     |                          |
| Encephalitis                 |                       | Global                                           | 1444.7 (1280.1–1614.9) | 12.5% (8.1 to 17.1%)     | 19.3 (17.1–21.7)         | -16.5% (-17.8 to -15.2%) | 0.92                     |
|                              |                       | Southeast Asia, East Asia, and Oceania           | 297.2 (257–339.9)      | -9% (-14 to -3.8%)       | 16.8 (14.3–19.6)         | -10.8% (-13.6 to -7.7%)  | 0.79                     |
|                              |                       | Central Europe, Eastern Europe, and Central Asia | 39.4 (34.8–43.8)       | -9% (-11.6 to -6.2%)     | 10 (8.8–11.4)            | -5.9% (-7.6 to -4.3%)    | 0.70                     |
|                              |                       | High-income                                      | 66.4 (59.4–73.6)       | 18.3% (12.9 to 24.4%)    | 5.7 (5–6.5)              | -10.3% (-12.5 to -8%)    | 1.04                     |

**Table S10** Global and regional burden, mortality, incidence, and prevalence of neurological conditions in different regions of the world

| Measure | Cause                                   | Region                                           | All Ages                                   |                                                      | Age-standardised                          |                                                      | Sex ratio<br>2019<br>F:M |      |
|---------|-----------------------------------------|--------------------------------------------------|--------------------------------------------|------------------------------------------------------|-------------------------------------------|------------------------------------------------------|--------------------------|------|
|         |                                         |                                                  | Number (thousand)<br>2019<br>Mean (95% UI) | Percent change<br>From 1990 to 2019<br>Mean (95% UI) | Rate per 100 000<br>2019<br>Mean (95% UI) | Percent change<br>From 1990 to 2019<br>Mean (95% UI) |                          |      |
| Tetanus |                                         | Latin America and Caribbean                      | 59.4 (51.2–68.3)                           | -4.1% (-9.4 to 0.9%)                                 | 11 (9.4–12.7)                             | -25.3% (-28 to -22.2%)                               | 0.96                     |      |
|         |                                         | North Africa and Middle East                     | 58.1 (49.8–67)                             | 46.2% (40.2 to 53.3%)                                | 9.9 (8.5–11.3)                            | -4.4% (-5.8 to -3%)                                  | 1.21                     |      |
|         |                                         | South Asia                                       | 743.1 (669.1–816.1)                        | 11% (5.5 to 16.5%)                                   | 46.7 (42.3–51.2)                          | -26.7% (-27.9 to -25.5%)                             | 0.99                     |      |
|         |                                         | Sub-Saharan Africa                               | 181.1 (153–212.8)                          | 108.3% (104.7 to 112%)                               | 16.5 (14.4–18.7)                          | -1.2% (-1.9 to -0.4%)                                | 0.92                     |      |
|         |                                         | World Bank High Income                           | 71.7 (64.1–79.5)                           | 16.3% (10.6 to 22.2%)                                | 5.7 (5–6.5)                               | -11.2% (-13.4 to -9%)                                | 1.04                     |      |
|         |                                         | World Bank Upper Middle Income                   | 339.4 (295.6–386.7)                        | -8.1% (-13 to -2.9%)                                 | 15.4 (13–17.9)                            | -11.2% (-14 to -8.1%)                                | 0.85                     |      |
|         |                                         | World Bank Lower Middle Income                   | 913.2 (814.7–1015)                         | 15.7% (10.7 to 21%)                                  | 31.9 (28.8–35.2)                          | -22.3% (-23.7 to -20.9%)                             | 0.93                     |      |
|         |                                         | World Bank Low Income                            | 119.8 (102.1–140.2)                        | 88.6% (84.2 to 93.2%)                                | 16.9 (14.9–19)                            | -6.8% (-8 to -5.6%)                                  | 0.91                     |      |
|         |                                         | Global                                           | 73.7 (53.3–101.1)                          | -88% (-91.1 to -83.2%)                               | 1 (0.7–1.4)                               | -90% (-92.4 to -86.1%)                               | 0.78                     |      |
|         |                                         | Southeast Asia, East Asia, and Oceania           | 14.9 (8–19.5)                              | -90.4% (-94.6 to -85.9%)                             | 0.7 (0.4–0.9)                             | -92.8% (-95.4 to -89.8%)                             | 0.55                     |      |
|         |                                         | Central Europe, Eastern Europe, and Central Asia | 0.1 (0–0.1)                                | -85% (-88.8 to -66.9%)                               | <0.1 (<0.1–<0.1)                          | -87.3% (-90.4 to -73.8%)                             | 0.61                     |      |
|         |                                         | High-income                                      | 0.3 (0.3–0.6)                              | -80.3% (-85 to -59.4%)                               | <0.1 (<0.1–<0.1)                          | -88.9% (-91.5 to -76.4%)                             | 0.71                     |      |
|         |                                         | Latin America and Caribbean                      | 0.7 (0.5–1.4)                              | -87.2% (-91.4 to -75.8%)                             | 0.1 (0.1–0.3)                             | -91.6% (-94.3 to -84.2%)                             | 0.64                     |      |
|         |                                         | North Africa and Middle East                     | 1.9 (1.2–2.9)                              | -83% (-90.6 to -68%)                                 | 0.3 (0.2–0.5)                             | -88.4% (-92.9 to -79%)                               | 0.82                     |      |
|         | Brain and central nervous system cancer |                                                  | South Asia                                 | 28.5 (19.5–41.3)                                     | -92.4% (-94.6 to -89.1%)                  | 1.8 (1.2–2.6)                                        | -93% (-94.9 to -90.2%)   | 1.07 |
|         |                                         |                                                  | Sub-Saharan Africa                         | 27.2 (17.5–42.4)                                     | -60% (-74.7 to -37.2%)                    | 2.5 (1.5–4)                                          | -77.9% (-84.4 to -69%)   | 0.66 |
|         |                                         | World Bank High Income                           | 0.4 (0.3–0.7)                              | -79.9% (-86.6 to -69.4%)                             | <0.1 (<0.1–<0.1)                          | -88.7% (-93.3 to -82.6%)                             | 0.68                     |      |
|         |                                         | World Bank Upper Middle Income                   | 2.6 (1.8–4.2)                              | -96.4% (-97.6 to -93.8%)                             | 0.1 (0.1–0.1)                             | -97.3% (-98.1 to -95.5%)                             | 0.44                     |      |
|         |                                         | World Bank Lower Middle Income                   | 53.2 (37.1–71.3)                           | -88.8% (-92 to -84.5%)                               | 1.8 (1.3–2.4)                             | -90.8% (-93.1 to -87.5%)                             | 0.81                     |      |
|         |                                         | World Bank Low Income                            | 17.4 (10.8–28.4)                           | -73.2% (-82.3 to -51.2%)                             | 2.4 (1.5–3.7)                             | -83.2% (-88.4 to -74.7%)                             | 0.66                     |      |
|         |                                         | Global                                           | 348 (262.1–388.9)                          | 94.4% (22 to 128.3%)                                 | 4.3 (3.3–4.9)                             | 13.8% (-27.3 to 32.8%)                               | 0.80                     |      |
|         |                                         | Southeast Asia, East Asia, and Oceania           | 113.6 (87–134.3)                           | 103.8% (34.7 to 159.5%)                              | 4.7 (3.6–5.5)                             | 22.2% (-19.7 to 52.5%)                               | 0.98                     |      |
|         |                                         | Central Europe, Eastern Europe, and Central Asia | 28 (20.5–31.8)                             | 42.9% (-7.3 to 66.2%)                                | 5.3 (3.9–6)                               | 21.5% (-21.1 to 41.1%)                               | 0.68                     |      |
|         |                                         | High-income                                      | 104 (71.4–121.9)                           | 78% (8.6 to 110.7%)                                  | 6.7 (4.7–7.8)                             | 18.9% (-25.9 to 40.9%)                               | 0.74                     |      |
|         |                                         | Latin America and Caribbean                      | 23.7 (15.7–27.9)                           | 177.2% (34.7 to 263.4%)                              | 4 (2.7–4.8)                               | 50.5% (-26.4 to 96.5%)                               | 0.80                     |      |
|         |                                         | North Africa and Middle East                     | 27.5 (18.6–32.6)                           | 152.5% (49.6 to 233.1%)                              | 5.2 (3.5–6.1)                             | 28% (-19.6 to 63.3%)                                 | 0.84                     |      |
|         |                                         | South Asia                                       | 37.2 (28.4–44.8)                           | 86.6% (12.2 to 156.2%)                               | 2.3 (1.7–2.7)                             | 11.7% (-28.4 to 44.4%)                               | 0.70                     |      |
|         |                                         | Sub-Saharan Africa                               | 13.9 (9.7–17.1)                            | 136.9% (31 to 259%)                                  | 1.7 (1.2–2)                               | 19.4% (-27.8 to 64.5%)                               | 0.70                     |      |
|         |                                         | World Bank High Income                           | 111.5 (76.6–130.2)                         | 77% (7.6 to 108.5%)                                  | 6.6 (4.6–7.6)                             | 17.6% (-27 to 38.4%)                                 | 0.75                     |      |
| Stroke  |                                         |                                                  | World Bank Upper Middle Income             | 155 (113.6–177.1)                                    | 107.6% (30.9 to 147.9%)                   | 5.2 (3.8–5.9)                                        | 27.9% (-19.5 to 52.6%)   | 0.92 |
|         |                                         | World Bank Lower Middle Income                   | 70.9 (54.3–81.9)                           | 95.5% (20.3 to 150.2%)                               | 2.5 (1.9–2.9)                             | 12.8% (-25.4 to 37.7%)                               | 0.75                     |      |
|         |                                         | World Bank Low Income                            | 10.4 (7.5–13)                              | 106.3% (19.3 to 217.5%)                              | 1.9 (1.4–2.4)                             | 9.3% (-32.5 to 52.4%)                                | 0.72                     |      |
|         |                                         | Global                                           | 12224.6 (11041.8–13589.3)                  | 70.1% (66.6 to 73.4%)                                | 150.8 (136.5–167.5)                       | -16.9% (-18.4 to -15.3%)                             | 0.99                     |      |
|         |                                         | Southeast Asia, East Asia, and Oceania           | 5415.4 (4789.4–6219.4)                     | 118.7% (107.1 to 130.4%)                             | 206.2 (183.9–234.4)                       | -8% (-12.8 to -3.2%)                                 | 0.92                     |      |
|         |                                         | Central Europe, Eastern Europe, and Central Asia | 1080.9 (973.6–1205.9)                      | -4.4% (-6.5 to -2.2%)                                | 179.6 (163.2–199)                         | -27.9% (-28.9 to -26.8%)                             | 0.91                     |      |
|         |                                         | High-income                                      | 1710.5 (1545.2–1899.3)                     | 10.4% (7 to 14.1%)                                   | 87.6 (79.6–96.4)                          | -34% (-36 to -31.9%)                                 | 1.10                     |      |

**Table S10** Global and regional burden, mortality, incidence, and prevalence of neurological conditions in different regions of the world

| Measure                  | Cause                     | Region                                           | All Ages                       |                          | Age-standardised         |                          | Sex ratio<br>2019<br>F:M |      |
|--------------------------|---------------------------|--------------------------------------------------|--------------------------------|--------------------------|--------------------------|--------------------------|--------------------------|------|
|                          |                           |                                                  | Number (thousand)              | Percent change           | Rate per 100 000         | Percent change           |                          |      |
|                          |                           |                                                  | 2019                           | From 1990 to 2019        | 2019                     | From 1990 to 2019        |                          |      |
|                          |                           | Mean (95% UI)                                    | Mean (95% UI)                  | Mean (95% UI)            | Mean (95% UI)            |                          |                          |      |
| Ischaemic stroke         |                           | Latin America and Caribbean                      | 638.1 (581.3–703.2)            | 53.9% (50 to 57.8%)      | 109.2 (99.5–120.3)       | -35.5% (-36.6 to -34.3%) | 0.96                     |      |
|                          |                           | North Africa and Middle East                     | 829.8 (758.4–912.8)            | 130.7% (124.4 to 137.7%) | 183 (166.7–201.7)        | -5.4% (-7.4 to -3.3%)    | 1.13                     |      |
|                          |                           | South Asia                                       | 1698.6 (1524.2–1894.1)         | 110.1% (104.8 to 115%)   | 117.3 (105.9–130.4)      | -10.2% (-11.4 to -9.1%)  | 1.04                     |      |
|                          |                           | Sub-Saharan Africa                               | 851.3 (777.1–933.6)            | 89.8% (86.9 to 92.5%)    | 160 (147.1–175.3)        | -13.9% (-15.2 to -12.7%) | 1.07                     |      |
|                          |                           | World Bank High Income                           | 1939.7 (1756.8–2152.2)         | 11.5% (8.2 to 15%)       | 92.6 (84.2–102)          | -33.4% (-35.4 to -31.4%) | 1.08                     |      |
|                          |                           | World Bank Upper Middle Income                   | 5884.1 (5210–6712.2)           | 83.4% (75.4 to 91.1%)    | 179.7 (160.4–203.2)      | -17.4% (-20.6 to -14.1%) | 0.94                     |      |
|                          |                           | World Bank Lower Middle Income                   | 3782.2 (3447.6–4190.7)         | 98.1% (95.2 to 101.1%)   | 154.8 (141.3–171)        | -11.6% (-12.6 to -10.8%) | 1.01                     |      |
|                          |                           | World Bank Low Income                            | 612 (564.9–666.6)              | 88.2% (85.3 to 91.1%)    | 171.2 (159–185.8)        | -12.5% (-13.8 to -11.1%) | 1.04                     |      |
|                          |                           | Global                                           | 7630.8 (6569.2–8960.4)         | 87.6% (83.5 to 91.7%)    | 94.5 (81.9–110.8)        | -10% (-12 to -8%)        | 1.07                     |      |
|                          |                           | Southeast Asia, East Asia, and Oceania           | 3643.3 (3052–4352)             | 201% (188 to 214.4%)     | 138 (116.7–164.8)        | 26.8% (23 to 30.9%)      | 1.04                     |      |
|                          |                           | Central Europe, Eastern Europe, and Central Asia | 755.3 (650.3–876.1)            | -3.3% (-6.1 to -0.5%)    | 123.5 (107.1–142.7)      | -28.5% (-29.8 to -27.1%) | 1.00                     |      |
|                          |                           | High-income                                      | 1075.6 (922.8–1252.3)          | 0.6% (-3.2 to 4.8%)      | 53.1 (45.6–61.4)         | -41.1% (-43.2 to -38.7%) | 1.09                     |      |
|                          |                           | Latin America and Caribbean                      | 382.6 (331.3–448.2)            | 59.3% (54 to 64.5%)      | 66.4 (57.4–77.6)         | -35% (-36.6 to -33.4%)   | 0.89                     |      |
|                          |                           | North Africa and Middle East                     | 602.5 (531.3–682.5)            | 166.9% (157.2 to 177.2%) | 135.5 (119.7–153.6)      | 8.8% (6.3 to 11.4%)      | 1.16                     |      |
|                          | Intracerebral haemorrhage |                                                  | South Asia                     | 708.1 (601.3–831.2)      | 119.6% (108.5 to 129.9%) | 50.5 (43–58.9)           | -4.5% (-6 to -3%)        | 1.01 |
|                          |                           |                                                  | Sub-Saharan Africa             | 463.4 (399.7–536.6)      | 111.2% (107.9 to 114.3%) | 86.1 (75–98.9)           | -2.1% (-3.1 to -1%)      | 1.20 |
|                          |                           | World Bank High Income                           | 1250.2 (1079.5–1449.8)         | 3.2% (-0.4 to 7.4%)      | 57.9 (50–66.8)           | -39.3% (-41.3 to -37%)   | 1.08                     |      |
|                          |                           | World Bank Upper Middle Income                   | 4161.5 (3508.9–4931.2)         | 130.2% (122.5 to 139%)   | 126.6 (108.3–149.8)      | 2.1% (-0.9 to 5.1%)      | 1.04                     |      |
|                          |                           | World Bank Lower Middle Income                   | 1890.7 (1634.2–2191.2)         | 111.3% (105.4 to 116.6%) | 79.6 (69.3–92.3)         | -6.6% (-8.2 to -5%)      | 1.07                     |      |
|                          |                           | World Bank Low Income                            | 324.8 (282.9–372.6)            | 111.7% (107.6 to 116.2%) | 89.5 (78.7–102.5)        | -0.3% (-2.1 to 1.7%)     | 1.16                     |      |
|                          |                           | Global                                           | 3409.1 (2970.5–3909.2)         | 43.2% (40.7 to 45.5%)    | 41.8 (36.5–47.9)         | -29.2% (-30.5 to -27.8%) | 0.78                     |      |
|                          |                           | Southeast Asia, East Asia, and Oceania           | 1451.1 (1252.3–1686.5)         | 38.4% (33.8 to 43.6%)    | 55.9 (48.4–64.3)         | -42.4% (-45.1 to -39.6%) | 0.64                     |      |
|                          |                           | Central Europe, Eastern Europe, and Central Asia | 209.1 (188–234.3)              | -14.3% (-16.2 to -12%)   | 35.8 (32.2–40)           | -33.1% (-34.4 to -31.9%) | 0.66                     |      |
|                          |                           | High-income                                      | 271.1 (237.2–307.8)            | -0.1% (-3.1 to 3.4%)     | 14 (12.3–15.8)           | -41.2% (-42.7 to -39.7%) | 0.76                     |      |
|                          |                           | Latin America and Caribbean                      | 160.5 (140.7–183)              | 29.3% (25.3 to 33.4%)    | 27.1 (23.8–31)           | -44.4% (-45.7 to -43%)   | 0.90                     |      |
|                          |                           | North Africa and Middle East                     | 163.2 (149.2–179.8)            | 65.1% (60.7 to 69.7%)    | 35 (31.8–38.6)           | -32.6% (-34.5 to -30.6%) | 1.00                     |      |
|                          |                           | South Asia                                       | 815.7 (692.8–959.2)            | 109.3% (104.4 to 114.2%) | 55.8 (47.5–65.6)         | -13.1% (-14.9 to -11.3%) | 1.06                     |      |
|                          |                           | Sub-Saharan Africa                               | 338.4 (303.9–377.2)            | 65.3% (62.3 to 68.1%)    | 65.5 (58.9–73)           | -26% (-27 to -24.9%)     | 0.94                     |      |
| Subarachnoid haemorrhage |                           |                                                  | World Bank High Income         | 308.4 (271.9–348.7)      | 0.1% (-2.7 to 3.3%)      | 14.9 (13.3–16.8)         | -40.5% (-42 to -39.1%)   | 0.74 |
|                          |                           |                                                  | World Bank Upper Middle Income | 1279.2 (1097–1488.3)     | 17.1% (13.2 to 21.3%)    | 39.6 (34.1–45.9)         | -46.7% (-48.8 to -44.5%) | 0.64 |
|                          |                           | World Bank Lower Middle Income                   | 1572.1 (1362.8–1817.7)         | 89.8% (86.7 to 92.6%)    | 63.2 (54.9–72.7)         | -15.5% (-16.8 to -14.4%) | 0.93                     |      |
|                          |                           | World Bank Low Income                            | 247.2 (226.1–269.8)            | 64.1% (61.3 to 67.1%)    | 71.2 (65.3–77.9)         | -24% (-25.2 to -22.8%)   | 0.92                     |      |
|                          |                           | Global                                           | 1184.6 (1005.9–1390.4)         | 60.7% (56.5 to 64.7%)    | 14.5 (12.3–16.9)         | -16.9% (-18.8 to -15.3%) | 1.21                     |      |
|                          |                           | Southeast Asia, East Asia, and Oceania           | 321 (271–378.1)                | 47.8% (39.4 to 55.7%)    | 12.3 (10.6–14.4)         | -32.5% (-36.8 to -28.9%) | 1.05                     |      |
|                          |                           | Central Europe, Eastern Europe, and Central Asia | 116.5 (99.2–137.4)             | 10.8% (8 to 13.8%)       | 20.3 (17.4–23.8)         | -10.9% (-12.4 to -9.5%)  | 0.90                     |      |
|                          |                           | High-income                                      | 363.8 (308.5–430.3)            | 74.5% (67.3 to 81.2%)    | 20.5 (17.4–23.9)         | 8.7% (5.9 to 11.7%)      | 1.44                     |      |

**Table S10** Global and regional burden, mortality, incidence, and prevalence of neurological conditions in different regions of the world

| Measure                 | Cause                                   | Region                                           | All Ages                     |                            | Age-standardised          |                          | Sex ratio<br>2019<br>F:M |      |
|-------------------------|-----------------------------------------|--------------------------------------------------|------------------------------|----------------------------|---------------------------|--------------------------|--------------------------|------|
|                         |                                         |                                                  | Number (thousand)            | Percent change             | Rate per 100 000          | Percent change           |                          |      |
|                         |                                         |                                                  | 2019                         | From 1990 to 2019          | 2019                      | From 1990 to 2019        |                          |      |
|                         |                                         | Mean (95% UI)                                    | Mean (95% UI)                | Mean (95% UI)              | Mean (95% UI)             |                          |                          |      |
| Neurological disorders* |                                         | Latin America and Caribbean                      | 95 (81·5–111·6)              | 88·4% (79·5 to 96·8%)      | 15·7 (13·5–18·4)          | -14·1% (-16·2 to -11·9%) | 1·46                     |      |
|                         |                                         | North Africa and Middle East                     | 64·1 (54·6–75·6)             | 82·9% (75·3 to 92·5%)      | 12·5 (10·7–14·7)          | -26·4% (-29·2 to -23·3%) | 1·24                     |      |
|                         |                                         | South Asia                                       | 174·7 (148–208·1)            | 81·6% (77·7 to 85·6%)      | 11·1 (9·4–13·2)           | -18·7% (-20·3 to -17%)   | 1·09                     |      |
|                         |                                         | Sub-Saharan Africa                               | 49·5 (41–59·6)               | 101·9% (97·2 to 107%)      | 8·5 (6·9–10·2)            | -11·4% (-12·7 to -10%)   | 0·90                     |      |
|                         |                                         | World Bank High Income                           | 381·2 (322·9–451)            | 72·5% (65·5 to 78·9%)      | 19·8 (16·7–23·1)          | 6·6% (3·9 to 9·4%)       | 1·43                     |      |
|                         |                                         | World Bank Upper Middle Income                   | 443·3 (377–522·7)            | 43·6% (37·6 to 49%)        | 13·5 (11·7–15·9)          | -29% (-32·4 to -26·5%)   | 1·15                     |      |
|                         |                                         | World Bank Lower Middle Income                   | 319·4 (270·7–378·3)          | 71·9% (69 to 75·2%)        | 12 (10·2–14·2)            | -20·9% (-22·4 to -19·5%) | 1·07                     |      |
|                         |                                         | World Bank Low Income                            | 40·1 (33·8–47·6)             | 90·3% (85·4 to 95·3%)      | 10·5 (8·7–12·5)           | -13·3% (-15·1 to -11·4%) | 0·97                     |      |
|                         |                                         | Global                                           | 805178·5 (725838·1–888847·4) | 49·1% (46·1 to 52·4%)      | 10259·5 (9223·2–11324·2)  | -0·1% (-0·6 to 0·5%)     | 1·11                     |      |
|                         |                                         | Southeast Asia, East Asia, and Oceania           | 194539·5 (174829·5–214928·3) | 36·6% (30·3 to 42·9%)      | 8814·5 (7936–9750·4)      | 4·9% (3·2 to 6·7%)       | 1·19                     |      |
|                         |                                         | Central Europe, Eastern Europe, and Central Asia | 52731·7 (47396–58219·9)      | 0·5% (-1·6 to 2·9%)        | 12359·3 (11058·2–13681·2) | 0% (-1 to 0·9%)          | 1·09                     |      |
|                         |                                         | High-income                                      | 137733·4 (124215·6–151650)   | 18·4% (15·5 to 21·5%)      | 12412 (11123·1–13713·2)   | 0·2% (-0·9 to 1·2%)      | 1·15                     |      |
|                         |                                         | Latin America and Caribbean                      | 62722·6 (56051·7–69366·1)    | 54·5% (48·8 to 59·8%)      | 10557·5 (9444·7–11680·6)  | 0·5% (-0·4 to 1·4%)      | 1·11                     |      |
|                         |                                         | North Africa and Middle East                     | 61542·7 (54639·6–68418·4)    | 89·1% (82·4 to 95·8%)      | 10090·8 (9024·1–11159·3)  | 0·8% (0 to 1·6%)         | 1·07                     |      |
|                         |                                         | South Asia                                       | 200573·3 (179176·1–222566·4) | 76·4% (72·7 to 80·3%)      | 10892·1 (9821–12030·4)    | 0% (-0·4 to 0·4%)        | 1·03                     |      |
|                         | Alzheimer's disease and other dementias |                                                  | Sub-Saharan Africa           | 95335·2 (83533·8–106945·6) | 128·2% (126·7 to 129·6%)  | 9445·5 (8443–10478)      | -0·4% (-0·7 to -0·2%)    | 1·05 |
|                         |                                         |                                                  | World Bank High Income       | 150554 (135429·6–165808·3) | 19% (16·1 to 22%)         | 12200 (10936·3–13478·3)  | -0·6% (-1·6 to 0·4%)     | 1·15 |
|                         |                                         | World Bank Upper Middle Income                   | 252144·5 (226768·2–278851·9) | 33% (27·7 to 38·6%)        | 9327·5 (8375·4–10322·8)   | 3·1% (1·9 to 4·4%)       | 1·17                     |      |
|                         |                                         | World Bank Lower Middle Income                   | 342907 (306288·3–380531·5)   | 74·2% (70·7 to 77·6%)      | 10707 (9632·9–11814·4)    | -0·7% (-1 to -0·5%)      | 1·06                     |      |
|                         |                                         | World Bank Low Income                            | 59122·8 (51834·6–66755·7)    | 122·4% (120·7 to 124·2%)   | 8942·8 (7955·3–9950)      | -0·4% (-0·8 to 0%)       | 1·05                     |      |
|                         |                                         | Global                                           | 7236·4 (6217·2–8232·7)       | 147·7% (142 to 153·6%)     | 95 (81·6–107·9)           | 1·5% (0·2 to 2·8%)       | 1·24                     |      |
|                         |                                         | Southeast Asia, East Asia, and Oceania           | 2267·3 (1915·4–2613·3)       | 231% (222·2 to 240·6%)     | 99·6 (84·6–114)           | 11·7% (9·2 to 14·1%)     | 1·28                     |      |
|                         |                                         | Central Europe, Eastern Europe, and Central Asia | 653·9 (547·5–754·3)          | 62% (56·3 to 68%)          | 103·6 (87·4–118·8)        | 3·2% (1·6 to 4·9%)       | 1·13                     |      |
|                         |                                         | High-income                                      | 2513·7 (2178·2–2835)         | 107·2% (99·6 to 115%)      | 99·8 (86·5–112·6)         | 0·2% (-1·4 to 1·9%)      | 1·29                     |      |
|                         |                                         | Latin America and Caribbean                      | 504·7 (436·1–573·9)          | 225% (216·2 to 234·8%)     | 91·3 (78·8–104·3)         | 1·5% (-0·1 to 3·1%)      | 1·10                     |      |
|                         |                                         | North Africa and Middle East                     | 361·2 (309·7–413·1)          | 177·5% (171·2 to 184·3%)   | 110·2 (93·9–125·6)        | 0·8% (-0·7 to 2·6%)      | 1·09                     |      |
|                         |                                         | South Asia                                       | 678·7 (581·6–781·9)          | 211·4% (202 to 221·5%)     | 63·6 (54·2–73)            | -0·8% (-2·4 to 0·8%)     | 1·06                     |      |
|                         |                                         | Sub-Saharan Africa                               | 256·9 (222·9–292·7)          | 122·1% (117·1 to 127·1%)   | 82·4 (71–94·2)            | -0·7% (-2·2 to 0·6%)     | 1·28                     |      |
|                         |                                         | World Bank High Income                           | 2679·2 (2317·6–3021·1)       | 107·4% (99·9 to 115·3%)    | 100·2 (86·7–113·1)        | 0·3% (-1·3 to 1·9%)      | 1·28                     |      |
|                         |                                         | World Bank Upper Middle Income                   | 3051·3 (2583·7–3516·6)       | 199% (191·4 to 206·7%)     | 102 (86·7–116·7)          | 8·6% (6·8 to 10·4%)      | 1·21                     |      |
|                         |                                         | World Bank Lower Middle Income                   | 1318·2 (1130·5–1512·6)       | 150·2% (145·7 to 155%)     | 74·6 (63·6–85·4)          | -5·8% (-7·1 to -4·5%)    | 1·14                     |      |
|                         |                                         | World Bank Low Income                            | 184·3 (159·5–210·9)          | 128·8% (122·7 to 135·3%)   | 85·3 (73·3–97·3)          | -1·1% (-2·6 to 0·3%)     | 1·26                     |      |

**Table S10** Global and regional burden, mortality, incidence, and prevalence of neurological conditions in different regions of the world

| Measure                                          |                                                  | All Ages              |                          | Age-standardised      |                          | Sex ratio             |
|--------------------------------------------------|--------------------------------------------------|-----------------------|--------------------------|-----------------------|--------------------------|-----------------------|
|                                                  |                                                  | Number (thousand)     | Percent change           | Rate per 100 000      | Percent change           |                       |
| Cause                                            | Region                                           | 2019                  | From 1990 to 2019        | 2019                  | From 1990 to 2019        | 2019                  |
|                                                  |                                                  | Mean (95% UI)         | Mean (95% UI)            | Mean (95% UI)         | Mean (95% UI)            | F:M                   |
| Parkinson's disease                              | Global                                           | 1081·7 (953·3–1211·2) | 159·7% (153 to 167%)     | 13·4 (11·8–15)        | 19·6% (17 to 22·3%)      | 0·56                  |
|                                                  | Southeast Asia, East Asia, and Oceania           | 377·8 (320·5–434·2)   | 194·7% (187·7 to 202·2%) | 14·5 (12·3–16·6)      | 13·7% (11 to 16·6%)      | 0·63                  |
|                                                  | Central Europe, Eastern Europe, and Central Asia | 69·6 (61·8–77·7)      | 41·4% (37·2 to 46%)      | 10·9 (9·7–12·1)       | 2·6% (0 to 5·1%)         | 0·60                  |
|                                                  | High-income                                      | 364·5 (329·4–399·2)   | 147·6% (130·4 to 164·6%) | 16·4 (14·8–17·9)      | 38% (29 to 46·7%)        | 0·42                  |
|                                                  | Latin America and Caribbean                      | 63·6 (56·7–70·6)      | 222·1% (214·5 to 230·9%) | 11·2 (10–12·4)        | 14% (11·9 to 16%)        | 0·63                  |
|                                                  | North Africa and Middle East                     | 42·8 (38·3–47·3)      | 192·5% (184·3 to 201·9%) | 11·4 (10·3–12·5)      | 12·7% (9·9 to 15·7%)     | 0·68                  |
|                                                  | South Asia                                       | 128·5 (108·4–149·5)   | 204·1% (194·6 to 213·2%) | 10·1 (8·5–11·6)       | 8·7% (7·2 to 10·6%)      | 0·70                  |
|                                                  | Sub-Saharan Africa                               | 34·9 (31·1–38·9)      | 130·1% (125·8 to 134·7%) | 9·2 (8·2–10·2)        | 6·1% (4·8 to 7·5%)       | 0·72                  |
|                                                  | World Bank High Income                           | 385·3 (348·8–421·1)   | 144·9% (128·2 to 161·3%) | 16·2 (14·7–17·7)      | 36·3% (27·7 to 44·7%)    | 0·43                  |
|                                                  | World Bank Upper Middle Income                   | 449·2 (383·4–515·3)   | 175·5% (169·3 to 182·3%) | 13·6 (11·7–15·6)      | 14·7% (12·2 to 17·3%)    | 0·62                  |
|                                                  | World Bank Lower Middle Income                   | 222·7 (193·1–253·7)   | 162·2% (157·3 to 167·2%) | 10·5 (9·1–11·9)       | 8·3% (7·2 to 9·6%)       | 0·70                  |
|                                                  | World Bank Low Income                            | 24 (21·5–26·6)        | 119·3% (112·6 to 127%)   | 9 (8·1–9·8)           | 1·1% (-1 to 3·6%)        | 0·70                  |
|                                                  | Idiopathic epilepsy                              | Global                | 2898·2 (2098·7–3823·4)   | 55·9% (32·4 to 83·7%) | 38·8 (28–51·3)           | 16·9% (0·1 to 36·5%)  |
| Southeast Asia, East Asia, and Oceania           |                                                  | 551 (390·4–731·6)     | 53·1% (19·7 to 105%)     | 28·8 (19·8–38·2)      | 39·2% (10·1 to 83·5%)    | 0·90                  |
| Central Europe, Eastern Europe, and Central Asia |                                                  | 150·9 (104·6–203·9)   | 2·8% (-15·3 to 23·3%)    | 39·3 (27·2–53·4)      | 8% (-11·5 to 29·3%)      | 0·76                  |
| High-income                                      |                                                  | 422·2 (287·9–563·2)   | 24·5% (3·6 to 45·2%)     | 42·9 (28·5–59·1)      | 6·2% (-10·8 to 23·4%)    | 0·86                  |
| Latin America and Caribbean                      |                                                  | 289·7 (203·4–398·6)   | 33·2% (6·5 to 70·4%)     | 51·2 (35·5–69·6)      | -0·9% (-20·2 to 25·4%)   | 0·90                  |
| North Africa and Middle East                     |                                                  | 295·5 (195–407·7)     | 67·4% (20·3 to 135·5%)   | 48·2 (32·2–66·4)      | 8·3% (-21·5 to 51·4%)    | 0·85                  |
| South Asia                                       |                                                  | 629 (423·2–854·1)     | 69·6% (23·9 to 146·5%)   | 35·1 (23·9–47·3)      | 15·8% (-15·1 to 67·5%)   | 0·85                  |
| Sub-Saharan Africa                               |                                                  | 559·9 (362·6–790·4)   | 125% (79·2 to 192·5%)    | 46·7 (31·6–63·6)      | 6·7% (-14·9 to 38·7%)    | 0·80                  |
| World Bank High Income                           |                                                  | 479·6 (323·4–643·8)   | 28·2% (7·2 to 48·5%)     | 44·1 (28·7–60·3)      | 9·5% (-8·2 to 25·8%)     | 0·85                  |
| World Bank Upper Middle Income                   |                                                  | 865 (608·9–1152·7)    | 37% (12·5 to 68·7%)      | 36·5 (25·2–48·7)      | 23·9% (1·4 to 51·2%)     | 0·87                  |
| World Bank Lower Middle Income                   |                                                  | 1228·7 (849·1–1654)   | 73·8% (38·2 to 128·1%)   | 38·3 (26·7–51·2)      | 16·7% (-6·5 to 51·9%)    | 0·86                  |
| World Bank Low Income                            |                                                  | 323·1 (196·4–470·4)   | 121·2% (63·6 to 222·8%)  | 40·3 (25·3–57·2)      | 7·2% (-21·1 to 55·1%)    | 0·80                  |
| Multiple sclerosis                               |                                                  | Global                | 59·3 (51·8–66·9)         | 41·8% (37·7 to 45·7%) | 0·7 (0·6–0·8)            | -7·3% (-8·7 to -5·8%) |
|                                                  | Southeast Asia, East Asia, and Oceania           | 4·4 (3·6–5·2)         | 54·9% (41·8 to 66·6%)    | 0·2 (0·1–0·2)         | -3·3% (-5·1 to -1·5%)    | 1·18                  |
|                                                  | Central Europe, Eastern Europe, and Central Asia | 5·3 (4·7–6)           | -11·7% (-14·5 to -9·3%)  | 1·3 (1·1–1·4)         | -11·3% (-12·4 to -10·3%) | 1·21                  |
|                                                  | High-income                                      | 26·5 (23·9–29)        | 19% (13·6 to 23·9%)      | 2·7 (2·4–2·9)         | 15% (10·5 to 19·1%)      | 2·04                  |
|                                                  | Latin America and Caribbean                      | 3·4 (2·8–4·1)         | 99·5% (90·3 to 108·5%)   | 0·6 (0·5–0·7)         | 10·5% (8·6 to 12·6%)     | 1·72                  |
|                                                  | North Africa and Middle East                     | 9·2 (7·9–10·5)        | 120% (110 to 129·4%)     | 1·4 (1·2–1·6)         | 5·5% (4 to 6·8%)         | 1·75                  |
|                                                  | South Asia                                       | 7·4 (6–9)             | 109·2% (103·6 to 114·7%) | 0·4 (0·3–0·5)         | 9·1% (7·7 to 10·5%)      | 1·52                  |
|                                                  | Sub-Saharan Africa                               | 3 (2·4–3·6)           | 149·2% (145·7 to 153%)   | 0·3 (0·3–0·4)         | 5·9% (4·8 to 7·2%)       | 1·91                  |
|                                                  | World Bank High Income                           | 28·3 (25·6–31·1)      | 19·1% (14 to 23·6%)      | 2·5 (2·3–2·8)         | 11·8% (7·9 to 15·6%)     | 2·05                  |



**Table S10** Global and regional burden, mortality, incidence, and prevalence of neurological conditions in different regions of the world

| Measure               |                                                  | All Ages                               |                          | Age-standardised         |                       | Sex ratio              |      |
|-----------------------|--------------------------------------------------|----------------------------------------|--------------------------|--------------------------|-----------------------|------------------------|------|
|                       |                                                  | Number (thousand)                      | Percent change           | Rate per 100 000         | Percent change        |                        |      |
| Cause                 | Region                                           | 2019                                   | From 1990 to 2019        | 2019                     | From 1990 to 2019     | 2019                   |      |
|                       |                                                  | Mean (95% UI)                          | Mean (95% UI)            | Mean (95% UI)            | Mean (95% UI)         | F:M                    |      |
| Migraine              | World Bank Upper Middle Income                   | 14·9 (12·8–16·9)                       | 48·4% (42 to 54·5%)      | 0·5 (0·4–0·6)            | 6·6% (4·5 to 9·4%)    | 1·48                   |      |
|                       | World Bank Lower Middle Income                   | 13·8 (11·3–16·4)                       | 93·5% (89·1 to 98·2%)    | 0·4 (0·4–0·5)            | 2·4% (1·4 to 3·7%)    | 1·53                   |      |
|                       | World Bank Low Income                            | 2·3 (1·8–2·7)                          | 161·2% (156·4 to 167·4%) | 0·4 (0·3–0·4)            | 11·9% (10·1 to 14·1%) | 1·73                   |      |
|                       | Global                                           | 87649 (76635·7–98654·6)                | 40% (36·8 to 43·5%)      | 1142·5 (995·9–1289·4)    | 2·1% (1·1 to 2·8%)    | 1·69                   |      |
|                       | Southeast Asia, East Asia, and Oceania           | 22465·6 (19797·2–25160·1)              | 22·2% (16·5 to 28·1%)    | 1085·2 (951·1–1220·9)    | 6·8% (5·1 to 8·6%)    | 1·70                   |      |
|                       | Central Europe, Eastern Europe, and Central Asia | 4108·8 (3608–4635·2)                   | -7·1% (-9·3 to -4·8%)    | 1071 (934·3–1216·4)      | -0·1% (-0·4 to 0·3%)  | 1·86                   |      |
|                       | High-income                                      | 11229·2 (9877·3–12582·3)               | 5·4% (3·6 to 7·7%)       | 1241·4 (1079–1400·1)     | 1·2% (0 to 2·2%)      | 2·01                   |      |
|                       | Latin America and Caribbean                      | 6990·8 (6079·9–7888·4)                 | 35·3% (30·5 to 40·6%)    | 1208·5 (1049·3–1374·9)   | 1·6% (-0·1 to 3·1%)   | 1·98                   |      |
|                       | North Africa and Middle East                     | 7950·9 (6837·6–9083·6)                 | 70·6% (62·7 to 79·1%)    | 1238·9 (1063·5–1415·6)   | 0·4% (-0·7 to 1·6%)   | 1·69                   |      |
|                       | South Asia                                       | 23283·1 (20365·1–26136·7)              | 63·6% (57·2 to 69·6%)    | 1213·2 (1063·8–1358·6)   | -0·2% (-2·4 to 1·8%)  | 1·53                   |      |
|                       | Sub-Saharan Africa                               | 11620·6 (9811·2–13428·9)               | 129·3% (126·3 to 132·3%) | 992·7 (859·9–1132·8)     | 0·9% (0·1 to 1·6%)    | 1·54                   |      |
|                       | World Bank High Income                           | 12488·2 (10994·7–14040)                | 6·5% (4·4 to 9%)         | 1236·8 (1074·5–1397·1)   | 1·3% (0·3 to 2·2%)    | 1·99                   |      |
|                       | World Bank Upper Middle Income                   | 27121·9 (23923·5–30452·8)              | 19% (14·2 to 24·4%)      | 1089·4 (953·9–1227·1)    | 5·8% (4·2 to 7·6%)    | 1·82                   |      |
|                       | World Bank Lower Middle Income                   | 40861·2 (35590·1–46159·9)              | 64·4% (59·2 to 69·2%)    | 1211·8 (1057·7–1361·7)   | -0·3% (-1·6 to 0·8%)  | 1·56                   |      |
|                       | World Bank Low Income                            | 7126·1 (5930–8313·2)                   | 123·8% (121·2 to 126·2%) | 937·4 (800·9–1076·2)     | 0·7% (0·2 to 1·1%)    | 1·57                   |      |
| Tension-type headache | Global                                           | 706190·1 (626723·6–788575·3)           | 49·6% (46·2 to 53·3%)    | 8968·2 (7931·9–9990·5)   | -0·4% (-1 to 0·2%)    | 1·05                   |      |
|                       | Southeast Asia, East Asia, and Oceania           | 168861·3 (149198·7–189297·5)           | 37·4% (30·5 to 44·7%)    | 7585·7 (6721·2–8479·1)   | 4·4% (2·6 to 6·5%)    | 1·14                   |      |
|                       | Central Europe, Eastern Europe, and Central Asia | 47740 (42530–53277·5)                  | 0·6% (-1·6 to 3·4%)      | 11132·6 (9878·8–12448)   | -0·1% (-1·2 to 0·9%)  | 1·04                   |      |
|                       | High-income                                      | 123147·2 (110015·6–136995·2)           | 18·4% (15·4 to 22%)      | 11007 (9758·4–12289·1)   | 0% (-1·2 to 1·2%)     | 1·09                   |      |
|                       | Latin America and Caribbean                      | 54866·4 (48544·6–61500·3)              | 56·6% (50·4 to 63%)      | 9194·1 (8124·3–10313·7)  | 0·3% (-0·6 to 1·4%)   | 1·03                   |      |
|                       | North Africa and Middle East                     | 52879·8 (46137–59485·2)                | 91·9% (84 to 99·8%)      | 8680·1 (7631·6–9732·5)   | 0·9% (-0·1 to 1·7%)   | 1·01                   |      |
|                       | South Asia                                       | 175839·8 (155563·4–197126·6)           | 77·9% (73·6 to 82·3%)    | 9569·3 (8497·7–10681·1)  | 0% (-0·4 to 0·3%)     | 0·98                   |      |
|                       | Sub-Saharan Africa                               | 82855·6 (71291·4–94414·4)              | 128% (126·5 to 129·6%)   | 8313·5 (7335·4–9340·4)   | -0·6% (-0·9 to -0·4%) | 1·01                   |      |
|                       | World Bank High Income                           | 134462·4 (119979·6–149502·6)           | 19% (16 to 22·6%)        | 10798·5 (9576·8–12055·5) | -0·8% (-2 to 0·2%)    | 1·09                   |      |
|                       | World Bank Upper Middle Income                   | 220625·1 (196068·9–246983·6)           | 33·7% (27·9 to 40·2%)    | 8084·9 (7158·9–9035)     | 2·6% (1·1 to 4%)      | 1·10                   |      |
|                       | World Bank Lower Middle Income                   | 299249·9 (263442·6–334738·4)           | 75·3% (71·4 to 79·2%)    | 9371 (8317·3–10454·1)    | -0·8% (-1·1 to -0·6%) | 1·01                   |      |
|                       | World Bank Low Income                            | 51459·9 (44233·5–58852·5)              | 122·2% (120·3 to 124·2%) | 7869·8 (6908·2–8882·1)   | -0·6% (-0·9 to -0·2%) | 1·01                   |      |
|                       | Motor neuron disease                             | Global                                 | 63·7 (57·3–71·3)         | 79% (74·1 to 84%)        | 0·8 (0·7–0·9)         | 0·3% (-0·4 to 0·9%)    | 0·77 |
|                       |                                                  | Southeast Asia, East Asia, and Oceania | 12·1 (10–15)             | 55·5% (45 to 65·6%)      | 0·5 (0·4–0·6)         | -8·9% (-10·4 to -7·3%) | 0·83 |

**Table S10** Global and regional burden, mortality, incidence, and prevalence of neurological conditions in different regions of the world

|                                |                                                  | <b>All Ages</b>              |                          | <b>Age-standardised</b>   |                          |           |
|--------------------------------|--------------------------------------------------|------------------------------|--------------------------|---------------------------|--------------------------|-----------|
| <b>Measure</b>                 |                                                  | Number (thousand)            | Percent change           | Rate per 100 000          | Percent change           | Sex ratio |
| <b>Cause</b>                   | <b>Region</b>                                    | 2019                         | From 1990 to 2019        | 2019                      | From 1990 to 2019        | 2019      |
|                                |                                                  | Mean (95% UI)                | Mean (95% UI)            | Mean (95% UI)             | Mean (95% UI)            | F:M       |
| Headache disorders             | Central Europe, Eastern Europe, and Central Asia | 3 (2.6–3.5)                  | 27.8% (23.6 to 32.7%)    | 0.6 (0.5–0.7)             | 9.8% (7.5 to 12.3%)      | 0.78      |
|                                | High-income                                      | 30.1 (28.5–31.6)             | 89.2% (85.3 to 93.4%)    | 1.7 (1.6–1.8)             | 14.6% (13 to 16.3%)      | 0.70      |
|                                | Latin America and Caribbean                      | 4 (3.5–4.5)                  | 118.2% (103.3 to 133.9%) | 0.7 (0.6–0.8)             | 21.4% (17.4 to 25.4%)    | 0.81      |
|                                | North Africa and Middle East                     | 3.4 (2.9–4.1)                | 83.1% (70.8 to 94.9%)    | 0.6 (0.5–0.7)             | 1.9% (0.3 to 3.6%)       | 0.82      |
|                                | South Asia                                       | 6.9 (5.6–8.4)                | 75.6% (66 to 84.5%)      | 0.4 (0.3–0.5)             | -1.9% (-3.4 to -0.3%)    | 0.91      |
|                                | Sub-Saharan Africa                               | 4.3 (3.5–5.2)                | 117.3% (112.1 to 122.1%) | 0.6 (0.5–0.7)             | 0.4% (-0.2 to 1.1%)      | 0.93      |
|                                | World Bank High Income                           | 30.9 (29.3–32.6)             | 88.6% (84.5 to 92.6%)    | 1.6 (1.5–1.7)             | 14.1% (12.6 to 15.7%)    | 0.70      |
|                                | World Bank Upper Middle Income                   | 17.2 (14.6–20.5)             | 61.7% (52.7 to 70.7%)    | 0.6 (0.5–0.7)             | -0.1% (-2.1 to 1.8%)     | 0.82      |
|                                | World Bank Lower Middle Income                   | 12.4 (10.2–15.1)             | 75.9% (66.9 to 84.3%)    | 0.4 (0.4–0.5)             | -2.1% (-3 to -1%)        | 0.89      |
|                                | World Bank Low Income                            | 3.1 (2.6–3.8)                | 111.6% (106.5 to 116.4%) | 0.6 (0.5–0.8)             | 1.8% (1 to 2.7%)         | 0.93      |
|                                | Global                                           | 793839.1 (714299.8–877018.8) | 48.5% (45.4 to 51.7%)    | 10110.7 (9070.7–11167.1)  | -0.2% (-0.7 to 0.4%)     | 1.11      |
|                                | Southeast Asia, East Asia, and Oceania           | 191326.9 (171561.9–211839.5) | 35.5% (29.3 to 42%)      | 8670.9 (7789.1–9596.3)    | 4.7% (3.1 to 6.5%)       | 1.20      |
|                                | Central Europe, Eastern Europe, and Central Asia | 51848.9 (46467.7–57362)      | 0% (-2.1 to 2.4%)        | 12203.6 (10908.5–13536.1) | -0.1% (-1.1 to 0.8%)     | 1.09      |
|                                | High-income                                      | 134376.4 (120812–148269.9)   | 17.2% (14.4 to 20.4%)    | 12248.5 (10944.5–13542.9) | 0.1% (-1 to 1.2%)        | 1.15      |
|                                | Latin America and Caribbean                      | 61857.2 (55187.7–68524.1)    | 53.9% (48.2 to 59.3%)    | 10402.6 (9289.8–11520.2)  | 0.5% (-0.4 to 1.4%)      | 1.11      |
|                                | North Africa and Middle East                     | 60830.7 (53891.3–67676.1)    | 88.8% (82 to 95.6%)      | 9919 (8853.1–10989.5)     | 0.8% (-0.1 to 1.5%)      | 1.07      |
|                                | South Asia                                       | 199122.9 (177628–221237.2)   | 76.1% (72.3 to 80%)      | 10782.5 (9709–11924.4)    | 0% (-0.4 to 0.4%)        | 1.03      |
|                                | Sub-Saharan Africa                               | 94476.2 (82667–106164.1)     | 128.2% (126.7 to 129.6%) | 9306.2 (8303.4–10341.2)   | -0.5% (-0.7 to -0.2%)    | 1.05      |
|                                | World Bank High Income                           | 146950.6 (131956.5–162241.3) | 17.9% (15.1 to 20.9%)    | 12035.3 (10759.2–13320.2) | -0.6% (-1.6 to 0.3%)     | 1.16      |
|                                | World Bank Upper Middle Income                   | 247747 (222409.9–274188.2)   | 31.9% (26.5 to 37.5%)    | 9174.3 (8230.4–10161.3)   | 2.9% (1.7 to 4.3%)       | 1.17      |
| World Bank Lower Middle Income | 340111.1 (303054.8–377611.4)                     | 73.9% (70.4 to 77.3%)        | 10582.8 (9504.8–11684.9) | -0.8% (-1.1 to -0.5%)     | 1.06                     |           |
| World Bank Low Income          | 58586 (51180.8–66226.4)                          | 122.4% (120.7 to 124.2%)     | 8807.2 (7816.7–9825)     | -0.4% (-0.8 to -0.1%)     | 1.05                     |           |
| <b>Prevalence</b>              |                                                  |                              |                          |                           |                          |           |
| Meningitis                     | Global                                           | 7683.5 (6590.3–9132.2)       | -23.7% (-26 to -21.1%)   | 99.9 (85.5–118.8)         | -47.2% (-48.7 to -45.5%) | 0.98      |
|                                | Southeast Asia, East Asia, and Oceania           | 690.2 (590.4–814.5)          | -63.4% (-65.3 to -61%)   | 32.5 (27.7–38.4)          | -71% (-72.4 to -69.3%)   | 0.82      |
|                                | Central Europe, Eastern Europe, and Central Asia | 253.8 (215.2–300.1)          | -42.7% (-45.7 to -39.6%) | 59.7 (50.6–70.7)          | -43% (-46 to -39.9%)     | 0.90      |
|                                | High-income                                      | 313 (270.6–360.6)            | -45.1% (-47.6 to -42.4%) | 25.9 (22.3–30.1)          | -57.4% (-59.1 to -55.6%) | 0.86      |
|                                | Latin America and Caribbean                      | 270 (234.3–310.4)            | -27.1% (-31.6 to -21.9%) | 45.2 (39.3–52.1)          | -54.8% (-57.3 to -52%)   | 0.93      |
|                                | North Africa and Middle East                     | 356.2 (306.7–419.9)          | 5.7% (-1.6 to 14%)       | 60.5 (52.2–71.1)          | -44.7% (-48.4 to -40.7%) | 1.12      |
|                                | South Asia                                       | 2675.6 (2262.5–3190.2)       | -29% (-32.7 to -25.1%)   | 149.6 (126.9–178)         | -59.8% (-61.9 to -57.5%) | 1.07      |
|                                | Sub-Saharan Africa                               | 3124.7 (2646.9–3729.8)       | 15.8% (10.6 to 21.6%)    | 318.8 (273.6–375.8)       | -48.5% (-50.7 to -46%)   | 0.91      |
|                                | World Bank High Income                           | 351.4 (303.8–406)            | -43.4% (-45.7 to -40.9%) | 26.4 (22.7–30.7)          | -56.1% (-57.7 to -54.5%) | 0.86      |
|                                | World Bank Upper Middle Income                   | 849.2 (732.7–984.4)          | -57.7% (-60 to -54.8%)   | 31.3 (27–36.4)            | -67.6% (-69.2 to -65.7%) | 0.97      |



**Table S10** Global and regional burden, mortality, incidence, and prevalence of neurological conditions in different regions of the world

| Measure                                 | Cause                          | Region                                           | All Ages                                   |                                                      | Age-standardised                          |                                                      | Sex ratio<br>2019<br>F:M |
|-----------------------------------------|--------------------------------|--------------------------------------------------|--------------------------------------------|------------------------------------------------------|-------------------------------------------|------------------------------------------------------|--------------------------|
|                                         |                                |                                                  | Number (thousand)<br>2019<br>Mean (95% UI) | Percent change<br>From 1990 to 2019<br>Mean (95% UI) | Rate per 100 000<br>2019<br>Mean (95% UI) | Percent change<br>From 1990 to 2019<br>Mean (95% UI) |                          |
| Encephalitis                            |                                | World Bank Lower Middle Income                   | 4402.9 (3752.3–5266.2)                     | -21.7% (-24.7 to -18.5%)                             | 139.9 (119.7–166.8)                       | -55.1% (-56.8 to -53.2%)                             | 1.00                     |
|                                         |                                | World Bank Low Income                            | 2075.9 (1772–2460.4)                       | 14.3% (7.4 to 22.3%)                                 | 324.6 (279.5–380.9)                       | -47.6% (-50.6 to -44%)                               | 0.90                     |
|                                         |                                | Global                                           | 4499.4 (3372.1–5573.2)                     | 4.7% (1.6 to 8.9%)                                   | 56.8 (42.6–70.3)                          | -31.9% (-33.9 to -28.5%)                             | 0.99                     |
|                                         |                                | Southeast Asia, East Asia, and Oceania           | 1318.3 (1002–1645.4)                       | -16.2% (-19.2 to -12%)                               | 57.1 (43.8–70.9)                          | -39.3% (-41.9 to -35.6%)                             | 0.86                     |
|                                         |                                | Central Europe, Eastern Europe, and Central Asia | 108.2 (80.6–134.3)                         | -5.3% (-7 to -3.7%)                                  | 23.8 (18–29.3)                            | -10.1% (-11.7 to -8.1%)                              | 0.82                     |
|                                         |                                | High-income                                      | 157.4 (120.5–193.8)                        | 4.7% (2.1 to 7.2%)                                   | 12 (9.4–14.6)                             | -22% (-23.6 to -20.3%)                               | 1.10                     |
|                                         |                                | Latin America and Caribbean                      | 192.8 (146.3–238.9)                        | 16.3% (13.1 to 19.7%)                                | 32.3 (24.5–40.1)                          | -29.3% (-31.8 to -26.5%)                             | 1.16                     |
|                                         |                                | North Africa and Middle East                     | 167.5 (127.8–205.9)                        | 79.3% (73.4 to 86.9%)                                | 28 (21.2–34.6)                            | -10.4% (-13.5 to -5.9%)                              | 1.30                     |
|                                         |                                | South Asia                                       | 2039.9 (1521.1–2522.9)                     | 3.8% (-0.4 to 9.6%)                                  | 119.2 (88.3–147.8)                        | -44.3% (-46.3 to -40.9%)                             | 1.05                     |
|                                         |                                | Sub-Saharan Africa                               | 515.4 (382.8–646)                          | 119.3% (113.3 to 129.5%)                             | 58.1 (42–73.7)                            | -4.7% (-7.2 to -0.5%)                                | 0.98                     |
|                                         |                                | World Bank High Income                           | 171.1 (131.2–210.8)                        | 4.7% (2.1 to 7.3%)                                   | 11.9 (9.3–14.5)                           | -22.4% (-24 to -20.7%)                               | 1.10                     |
|                                         | World Bank Upper Middle Income | 1412.3 (1073.9–1759)                             | -13.6% (-16.6 to -9.6%)                    | 49.8 (38.2–61.7)                                     | -36.7% (-39.1 to -33.1%)                  | 0.92                                                 |                          |
| Tetanus                                 |                                | World Bank Lower Middle Income                   | 2528.8 (1886.9–3124.5)                     | 9.3% (5.3 to 15%)                                    | 84.6 (62.7–104.9)                         | -39.7% (-41.8 to -36.4%)                             | 1.00                     |
|                                         |                                | World Bank Low Income                            | 385.7 (286.4–482.2)                        | 110.5% (102.8 to 122.3%)                             | 66.8 (48.3–84.2)                          | -5.2% (-8.5 to -0.1%)                                | 0.99                     |
|                                         |                                | Global                                           | 61.7 (44.6–81.2)                           | -64.4% (-68.1 to -61.2%)                             | 0.8 (0.6–1.1)                             | -73.7% (-76.2 to -71.5%)                             | 1.01                     |
|                                         |                                | Southeast Asia, East Asia, and Oceania           | 12.9 (9–17.4)                              | -77.5% (-80.4 to -74.7%)                             | 0.6 (0.4–0.8)                             | -81.6% (-83.9 to -79.4%)                             | 1.39                     |
|                                         |                                | Central Europe, Eastern Europe, and Central Asia | <0.1 (<0.1–<0.1)                           | -78.4% (-83.9 to -62.5%)                             | <0.1 (<0.1–<0.1)                          | -80.1% (-85.3 to -66.9%)                             | 0.80                     |
|                                         |                                | High-income                                      | <0.1 (<0.1–0.1)                            | -67% (-75.2 to -51.8%)                               | <0.1 (<0.1–<0.1)                          | -74.5% (-81.8 to -64.7%)                             | 0.37                     |
|                                         |                                | Latin America and Caribbean                      | 0.4 (0.2–0.6)                              | -61.2% (-70 to -53.2%)                               | 0.1 (0–0.1)                               | -74.4% (-80.2 to -69.1%)                             | 0.79                     |
|                                         |                                | North Africa and Middle East                     | 0.7 (0.5–1.1)                              | -35.7% (-53.8 to -16.2%)                             | 0.1 (0.1–0.2)                             | -61.7% (-70.5 to -51.9%)                             | 0.63                     |
|                                         |                                | South Asia                                       | 32.6 (23.7–42.7)                           | -66.6% (-70.3 to -63.5%)                             | 1.8 (1.3–2.4)                             | -78.5% (-80.6 to -76.9%)                             | 1.00                     |
|                                         |                                | Sub-Saharan Africa                               | 15 (10.9–19.6)                             | -5.8% (-19.3 to 4.3%)                                | 1.4 (1–1.8)                               | -56.1% (-61.1 to -52.1%)                             | 0.82                     |
|                                         |                                | World Bank High Income                           | 0.1 (0.1–0.1)                              | -52.8% (-66.7 to -38.1%)                             | <0.1 (<0.1–<0.1)                          | -61.3% (-74.8 to -48.6%)                             | 0.57                     |
|                                         | World Bank Upper Middle Income | 4.7 (3–6.8)                                      | -86.1% (-89.1 to -82.9%)                   | 0.2 (0.1–0.3)                                        | -89.2% (-91.5 to -86.7%)                  | 0.80                                                 |                          |
|                                         | World Bank Lower Middle Income | 48.5 (35.3–63.4)                                 | -62.8% (-66.8 to -59.5%)                   | 1.5 (1.1–2)                                          | -76.5% (-78.6 to -74.7%)                  | 1.05                                                 |                          |
|                                         | World Bank Low Income          | 8.4 (6.1–10.9)                                   | -1.7% (-20.6 to 16.6%)                     | 1.2 (0.9–1.6)                                        | -47.7% (-55.4 to -41.6%)                  | 0.85                                                 |                          |
| Brain and central nervous system cancer |                                | Global                                           | 1065.3 (800.4–1199.9)                      | 151.5% (50.8 to 195.7%)                              | 13.5 (10.1–15.2)                          | 59.7% (-2.4 to 86.2%)                                | 1.01                     |
|                                         |                                | Southeast Asia, East Asia, and Oceania           | 364.6 (283.6–436.3)                        | 225.7% (102.4 to 346.8%)                             | 16.3 (12.5–19.2)                          | 137.2% (45.3 to 222%)                                | 1.48                     |
|                                         |                                | Central Europe, Eastern Europe, and Central Asia | 49.4 (37.1–55.8)                           | 53.7% (2.1 to 77.5%)                                 | 10.6 (8–12)                               | 42.5% (-5.9 to 64.7%)                                | 0.79                     |
|                                         |                                | High-income                                      | 411.2 (277.3–488)                          | 118.9% (31.8 to 163.4%)                              | 30.6 (21.4–36.3)                          | 56.3% (-3.4 to 87.4%)                                | 0.86                     |
|                                         |                                | Latin America and Caribbean                      | 49.5 (33.2–58.9)                           | 190.3% (41 to 286%)                                  | 8.5 (5.6–10.1)                            | 85.2% (-9.9 to 146.2%)                               | 0.91                     |
|                                         |                                | North Africa and Middle East                     | 97.2 (64.2–115.6)                          | 280.5% (113.9 to 424.7%)                             | 16.5 (10.8–19.5)                          | 119.1% (30.2 to 189.1%)                              | 0.81                     |
|                                         |                                | South Asia                                       | 67.3 (51.8–81)                             | 77.5% (1 to 162.8%)                                  | 3.9 (3–4.7)                               | 19.9% (-27.7 to 64.7%)                               | 0.71                     |
|                                         |                                | Sub-Saharan Africa                               | 26.2 (18.8–33.1)                           | 134.3% (24.6 to 275.2%)                              | 2.6 (1.8–3.2)                             | 20.2% (-31.1 to 73.9%)                               | 0.70                     |
|                                         |                                | World Bank High Income                           | 432 (294.6–511.1)                          | 119.9% (32.8 to 163.4%)                              | 29.4 (20.6–34.7)                          | 57% (-2.5 to 86.8%)                                  | 0.87                     |
|                                         |                                | World Bank Upper Middle Income                   | 474.2 (357.7–548)                          | 220.3% (94.5 to 293.2%)                              | 17.3 (12.9–19.9)                          | 137.9% (43.1 to 190.5%)                              | 1.29                     |

**Table S10** Global and regional burden, mortality, incidence, and prevalence of neurological conditions in different regions of the world

| Measure                   | Cause            | Region                                           | All Ages                                   |                                                      | Age-standardised                          |                                                      | Sex ratio<br>2019<br>F:M |
|---------------------------|------------------|--------------------------------------------------|--------------------------------------------|------------------------------------------------------|-------------------------------------------|------------------------------------------------------|--------------------------|
|                           |                  |                                                  | Number (thousand)<br>2019<br>Mean (95% UI) | Percent change<br>From 1990 to 2019<br>Mean (95% UI) | Rate per 100 000<br>2019<br>Mean (95% UI) | Percent change<br>From 1990 to 2019<br>Mean (95% UI) |                          |
| Stroke                    |                  | World Bank Lower Middle Income                   | 139·1 (107·2–161·6)                        | 101·5% (16·3 to 171·6%)                              | 4·6 (3·5–5·3)                             | 26·9% (-21 to 61·6%)                                 | 0·79                     |
|                           |                  | World Bank Low Income                            | 19·6 (14·3–25·1)                           | 97·8% (10·7 to 218%)                                 | 2·9 (2·1–3·7)                             | 5·9% (-36·8 to 54·7%)                                | 0·72                     |
|                           |                  | Global                                           | 101474·6 (93211·9–110526·3)                | 85·3% (82·6 to 88·2%)                                | 1240·3 (1139·7–1353)                      | -6·1% (-7·2 to -5%)                                  | 1·14                     |
|                           |                  | Southeast Asia, East Asia, and Oceania           | 40296·6 (36493·8–44443·6)                  | 136·9% (126·1 to 148·1%)                             | 1517·9 (1377·7–1679·5)                    | 9·3% (5·2 to 13·7%)                                  | 1·14                     |
|                           |                  | Central Europe, Eastern Europe, and Central Asia | 7627·4 (6942·9–8379·5)                     | 1·7% (0 to 3·3%)                                     | 1283·4 (1173·2–1400·8)                    | -19·2% (-20·5 to -17·8%)                             | 1·17                     |
|                           |                  | High-income                                      | 19336·4 (17636·2–21205·1)                  | 38·9% (35·5 to 42·2%)                                | 1031·4 (948·8–1123·2)                     | -13·9% (-16·1 to -11·9%)                             | 1·14                     |
|                           |                  | Latin America and Caribbean                      | 6641·7 (6100·9–7213)                       | 72·5% (69·4 to 76%)                                  | 1114·2 (1023·6–1210·9)                    | -26·5% (-27·9 to -25·2%)                             | 1·16                     |
|                           |                  | North Africa and Middle East                     | 7323·4 (6794·7–7863·1)                     | 142·1% (137·8 to 146·3%)                             | 1537·5 (1421·9–1659·9)                    | -0·5% (-2·3 to 1·1%)                                 | 1·24                     |
|                           |                  | South Asia                                       | 12784·1 (11531–14080·9)                    | 119·8% (115·6 to 124·2%)                             | 810·1 (730·5–892·8)                       | -0·6% (-2 to 0·8%)                                   | 1·09                     |
|                           |                  | Sub-Saharan Africa                               | 7465 (6847·8–8101)                         | 106·2% (103·4 to 108·7%)                             | 1283·5 (1185·4–1385·2)                    | -8·4% (-9·4 to -7·5%)                                | 1·18                     |
|                           |                  | World Bank High Income                           | 21470 (19663·6–23527·1)                    | 39·4% (36·2 to 42·6%)                                | 1065·4 (982·2–1157·8)                     | -13·7% (-15·7 to -11·7%)                             | 1·14                     |
|                           | Ischaemic stroke |                                                  | World Bank Upper Middle Income             | 45603·3 (41291·5–50255·8)                            | 99·7% (92·2 to 107·6%)                    | 1376·4 (1248·1–1516·3)                               | -2·9% (-5·9 to 0·2%)     |
|                           |                  | World Bank Lower Middle Income                   | 29398·6 (26844·8–31983·4)                  | 109·7% (107·4 to 112·2%)                             | 1120·2 (1023·6–1222·1)                    | -3·7% (-4·7 to -2·8%)                                | 1·11                     |
|                           |                  | World Bank Low Income                            | 4946·4 (4592·8–5310·6)                     | 100·4% (97·2 to 103·6%)                              | 1277·9 (1190·5–1367·9)                    | -8·2% (-9·5 to -7%)                                  | 1·20                     |
|                           |                  | Global                                           | 77192·5 (68857·2–86457·6)                  | 95·3% (91·7 to 99·3%)                                | 951 (849·8–1064·1)                        | -1·9% (-3·4 to -0·4%)                                | 1·19                     |
|                           |                  | Southeast Asia, East Asia, and Oceania           | 31681·7 (27554·1–36036·4)                  | 176·2% (159·9 to 194·3%)                             | 1220·2 (1067·6–1388·5)                    | 25·9% (19·8 to 32·5%)                                | 1·29                     |
|                           |                  | Central Europe, Eastern Europe, and Central Asia | 5913·4 (5217·5–6686·8)                     | 1·2% (-0·8 to 3·1%)                                  | 985·7 (873·4–1107·1)                      | -20·5% (-22·1 to -18·7%)                             | 1·22                     |
|                           |                  | High-income                                      | 15094·1 (13423·3–16968·2)                  | 36·5% (32·5 to 40·9%)                                | 786·1 (700·8–878·1)                       | -16·4% (-19·1 to -13·7%)                             | 1·05                     |
|                           |                  | Latin America and Caribbean                      | 4698 (4169·8–5255·7)                       | 75·4% (71·5 to 80%)                                  | 796·8 (707·6–890·4)                       | -26·2% (-28·1 to -24·3%)                             | 1·04                     |
|                           |                  | North Africa and Middle East                     | 5998·8 (5474–6566·7)                       | 157·6% (152·8 to 162·7%)                             | 1303·6 (1183·2–1435·4)                    | 5·9% (3·6 to 8%)                                     | 1·25                     |
|                           |                  | South Asia                                       | 8311·8 (7164·9–9433·9)                     | 129·6% (122·7 to 135·8%)                             | 532·4 (461·5–606·5)                       | 4·6% (3 to 6%)                                       | 1·05                     |
|                           |                  | Sub-Saharan Africa                               | 5494·7 (4870·4–6108·4)                     | 118·3% (115·8 to 120·6%)                             | 943·4 (847·8–1045·7)                      | -2·5% (-3·4 to -1·7%)                                | 1·32                     |
|                           |                  | World Bank High Income                           | 16808·3 (14986·1–18843·2)                  | 37·2% (33·2 to 41·2%)                                | 815 (728·9–907·5)                         | -16·1% (-18·7 to -13·5%)                             | 1·06                     |
| Intracerebral haemorrhage |                  | World Bank Upper Middle Income                   | 36852·5 (32321·9–41736·5)                  | 123·1% (112·3 to 134·7%)                             | 1125 (987·3–1271·4)                       | 7·3% (3·1 to 12·1%)                                  | 1·25                     |
|                           |                  | World Bank Lower Middle Income                   | 19886·8 (17496–22232·2)                    | 119·8% (116·4 to 122·9%)                             | 775·7 (685–874·5)                         | 0·7% (-0·6 to 2·1%)                                  | 1·16                     |
|                           |                  | World Bank Low Income                            | 3605·1 (3238·3–3957·3)                     | 115·3% (112 to 118·3%)                               | 934·8 (848·1–1020·8)                      | -1·7% (-3·2 to -0·4%)                                | 1·36                     |
|                           |                  | Global                                           | 20663·9 (18016·2–23417·9)                  | 57·8% (56·1 to 59·6%)                                | 248·8 (217·1–281·4)                       | -16·8% (-18·2 to -15·4%)                             | 0·90                     |
|                           |                  | Southeast Asia, East Asia, and Oceania           | 8073·5 (6957·9–9260·1)                     | 60·6% (57·3 to 64·3%)                                | 289·3 (251·3–330·3)                       | -23·4% (-25·9 to -20·9%)                             | 0·70                     |
|                           |                  | Central Europe, Eastern Europe, and Central Asia | 1221·2 (1069·3–1390)                       | -3·9% (-6 to -1·9%)                                  | 216·8 (190–245·5)                         | -19·2% (-21·3 to -17·3%)                             | 0·84                     |
|                           |                  | High-income                                      | 2305 (2040·6–2592·2)                       | 21·4% (18·4 to 24·4%)                                | 139·1 (122·5–156·6)                       | -18·9% (-21 to -16·6%)                               | 1·08                     |
|                           |                  | Latin America and Caribbean                      | 1530·3 (1349·4–1720·9)                     | 52·7% (48·3 to 56·8%)                                | 253 (223·4–284·2)                         | -31·7% (-33·9 to -29·5%)                             | 1·33                     |
|                           |                  | North Africa and Middle East                     | 1301·3 (1169·2–1441·4)                     | 89·8% (86 to 93·8%)                                  | 241·6 (217·5–265·7)                       | -21·1% (-23·1 to -19·2%)                             | 1·07                     |

**Table S10** Global and regional burden, mortality, incidence, and prevalence of neurological conditions in different regions of the world

| Measure                                 | Cause                   | Region                                           | All Ages                        |                          | Age-standardised          |                          | Sex ratio<br>2019<br>F:M |
|-----------------------------------------|-------------------------|--------------------------------------------------|---------------------------------|--------------------------|---------------------------|--------------------------|--------------------------|
|                                         |                         |                                                  | Number (thousand)               | Percent change           | Rate per 100 000          | Percent change           |                          |
|                                         |                         |                                                  | 2019                            | From 1990 to 2019        | 2019                      | From 1990 to 2019        |                          |
|                                         |                         | Mean (95% UI)                                    | Mean (95% UI)                   | Mean (95% UI)            | Mean (95% UI)             |                          |                          |
| Subarachnoid haemorrhage                |                         | South Asia                                       | 4142.7 (3526.6–4806)            | 102% (98.5 to 105.8%)    | 257.7 (219–298.2)         | -7.6% (-9.1 to -6%)      | 1.14                     |
|                                         |                         | Sub-Saharan Africa                               | 2090 (1864.8–2330.1)            | 79.5% (76 to 82.8%)      | 347.5 (309.6–388.7)       | -21.4% (-22.5 to -20.1%) | 0.87                     |
|                                         |                         | World Bank High Income                           | 2638.6 (2332.6–2962.4)          | 24.3% (21.4 to 27%)      | 149 (131.3–168.5)         | -16.4% (-18.8 to -13.8%) | 1.04                     |
|                                         |                         | World Bank Upper Middle Income                   | 7703.5 (6686.3–8783.7)          | 40.3% (37 to 43.7%)      | 229.2 (199.9–260.1)       | -28.4% (-30.8 to -25.9%) | 0.79                     |
|                                         |                         | World Bank Lower Middle Income                   | 8916.9 (7678–10185.3)           | 91.5% (89.1 to 93.7%)    | 324 (279.4–369.2)         | -10.3% (-11.2 to -9.2%)  | 0.96                     |
|                                         |                         | World Bank Low Income                            | 1390.5 (1258–1533.9)            | 70.1% (66.9 to 73.7%)    | 342.6 (308–379.9)         | -22.2% (-23.5 to -20.9%) | 0.86                     |
|                                         |                         | Global                                           | 8396.5 (7188.2–9833.3)          | 64.5% (60.4 to 68%)      | 101.6 (87.1–118.5)        | -12.9% (-15 to -11.5%)   | 1.44                     |
|                                         |                         | Southeast Asia, East Asia, and Oceania           | 2415.6 (2052–2857.4)            | 66.2% (59.5 to 71.6%)    | 89.3 (75.9–105)           | -17.6% (-21.1 to -15.2%) | 1.13                     |
|                                         |                         | Central Europe, Eastern Europe, and Central Asia | 784.4 (668.1–930.7)             | 6.9% (5.1 to 8.9%)       | 139.9 (119.8–165)         | -11.2% (-12.4 to -9.9%)  | 1.39                     |
|                                         |                         | High-income                                      | 2729.3 (2324.3–3236.1)          | 66.3% (59.5 to 73%)      | 159.8 (136.7–187.5)       | 6% (2.2 to 8.7%)         | 1.79                     |
|                                         |                         | Latin America and Caribbean                      | 700.4 (599.5–821.3)             | 87.9% (82.3 to 93.6%)    | 113.8 (97.8–133)          | -14.5% (-16.4 to -12.6%) | 1.78                     |
|                                         |                         | North Africa and Middle East                     | 376.9 (320.2–444.6)             | 103.4% (85 to 112.9%)    | 64 (54.5–75.3)            | -18.1% (-26.3 to -14.1%) | 1.58                     |
|                                         |                         | South Asia                                       | 1068.3 (895.6–1292.8)           | 87.6% (84.8 to 90.4%)    | 62.4 (52.4–75)            | -9.8% (-11.5 to -8.2%)   | 1.09                     |
|                                         |                         | Sub-Saharan Africa                               | 321.7 (272.6–381)               | 118.3% (114.5 to 122%)   | 49.4 (41.9–57.9)          | -6.3% (-7.5 to -5.2%)    | 1.10                     |
|                                         | Neurological disorders* |                                                  | World Bank High Income          | 2887.4 (2461.6–3411.7)   | 64% (57.4 to 70.4%)       | 155.1 (132.7–181.8)      | 3.7% (-0.1 to 6.2%)      |
|                                         |                         | World Bank Upper Middle Income                   | 3113.5 (2653.5–3684.1)          | 52.8% (48.1 to 57%)      | 93.5 (79.6–109.9)         | -20.1% (-22.7 to -18%)   | 1.34                     |
|                                         |                         | World Bank Lower Middle Income                   | 2141.6 (1822.6–2537.9)          | 81.5% (79.1 to 83.8%)    | 74.7 (63.4–88.2)          | -14.5% (-16.1 to -13.2%) | 1.17                     |
|                                         |                         | World Bank Low Income                            | 249.6 (213.5–291.5)             | 104.7% (101 to 108.8%)   | 58.3 (50.1–68.1)          | -7.9% (-9.3 to -6.2%)    | 1.14                     |
|                                         |                         | Global                                           | 2658932.4 (2452847.9–2858528.8) | 54.9% (52.4 to 57.4%)    | 33451.9 (30870.7–36082)   | 0.4% (-0.1 to 0.9%)      | 1.19                     |
|                                         |                         | Southeast Asia, East Asia, and Oceania           | 685311.8 (632012.6–737143.4)    | 46% (40.9 to 51.1%)      | 29629.5 (27228.8–32045.9) | 5.6% (4.2 to 7.4%)       | 1.26                     |
|                                         |                         | Central Europe, Eastern Europe, and Central Asia | 170256.3 (157476.9–182658.3)    | 3.6% (1.9 to 5.3%)       | 38238.6 (35315.8–41193.8) | 0.1% (-0.5 to 0.8%)      | 1.17                     |
|                                         |                         | High-income                                      | 461946.8 (429491–493936.9)      | 21.6% (19.5 to 23.6%)    | 39417.1 (36416.2–42300.7) | 0.5% (-0.2 to 1.2%)      | 1.23                     |
|                                         |                         | Latin America and Caribbean                      | 209057.1 (193343.7–225622.4)    | 62.6% (58.4 to 66.5%)    | 34661.9 (32067.7–37417)   | 0.2% (-0.5 to 1.1%)      | 1.22                     |
|                                         |                         | North Africa and Middle East                     | 208460.5 (190465.7–226945.6)    | 101.2% (95.9 to 106.6%)  | 34170.6 (31389.5–37068.5) | 1.4% (0.6 to 2.3%)       | 1.19                     |
|                                         |                         | South Asia                                       | 632154.3 (581340.6–683250.5)    | 84% (80.8 to 87.2%)      | 34526.3 (31816–37231.5)   | 0% (-0.8 to 0.8%)        | 1.12                     |
|                                         |                         | Sub-Saharan Africa                               | 291745.5 (263012.9–320857.4)    | 130.8% (129.4 to 132.4%) | 30661.7 (28059.7–33299.7) | -0.2% (-0.6 to 0.2%)     | 1.13                     |
|                                         |                         | World Bank High Income                           | 506563.2 (470908.3–541601)      | 22.7% (20.6 to 24.8%)    | 38838.4 (35884.3–41709)   | -0.2% (-0.8 to 0.5%)     | 1.24                     |
|                                         |                         | World Bank Upper Middle Income                   | 874705.6 (809482.2–941170.3)    | 41.6% (37.4 to 46.1%)    | 30981.9 (28555.6–33367.7) | 4% (2.7 to 5.3%)         | 1.25                     |
|                                         |                         | World Bank Lower Middle Income                   | 1094803.5 (1004711.5–1184738.7) | 81.2% (78.5 to 84%)      | 34537.4 (31861.5–37262.9) | -0.5% (-1 to 0%)         | 1.14                     |
|                                         | World Bank Low Income   | 181354.4 (161856.9–201444)                       | 125% (123.6 to 126.6%)          | 29116.4 (26502–31862.9)  | -0.2% (-0.8 to 0.2%)      | 1.14                     |                          |
| Alzheimer's disease and other dementias |                         | Global                                           | 51624.2 (44277–59021.5)         | 160.9% (156 to 166.3%)   | 682.5 (585.2–782.7)       | 5.7% (4.3 to 7%)         | 1.28                     |
|                                         |                         | Southeast Asia, East Asia, and Oceania           | 16388 (13798.5–19015.6)         | 264.1% (254 to 274.4%)   | 740.9 (625.7–855.2)       | 24.4% (21.7 to 27%)      | 1.33                     |

**Table S10** Global and regional burden, mortality, incidence, and prevalence of neurological conditions in different regions of the world

| Measure             | Cause               | Region                                           | All Ages                       |                                     | Age-standardised         |                                     | Sex ratio<br>2019<br>F:M |      |
|---------------------|---------------------|--------------------------------------------------|--------------------------------|-------------------------------------|--------------------------|-------------------------------------|--------------------------|------|
|                     |                     |                                                  | Number (thousand)<br>2019      | Percent change<br>From 1990 to 2019 | Rate per 100 000<br>2019 | Percent change<br>From 1990 to 2019 |                          |      |
|                     |                     |                                                  | Mean (95% UI)                  | Mean (95% UI)                       | Mean (95% UI)            | Mean (95% UI)                       |                          |      |
| Parkinson's disease |                     | Central Europe, Eastern Europe, and Central Asia | 4603.3 (3852–5389.2)           | 66.7% (61.9 to 72%)                 | 733.6 (615.5–854.9)      | 4.7% (3 to 6.4%)                    | 1.20                     |      |
|                     |                     | High-income                                      | 18291.5 (15842.7–20800.8)      | 118% (111.3 to 124.9%)              | 715 (623.2–813.2)        | 2.8% (1 to 4.9%)                    | 1.29                     |      |
|                     |                     | Latin America and Caribbean                      | 3516.7 (3040.7–4011.7)         | 235.8% (227.1 to 244.9%)            | 637.3 (550.6–727.8)      | 5.8% (4.2 to 7.3%)                  | 1.13                     |      |
|                     |                     | North Africa and Middle East                     | 2485.1 (2117.2–2865)           | 184.5% (178.1 to 190.7%)            | 777.6 (660.8–896)        | 3% (1.5 to 4.6%)                    | 1.11                     |      |
|                     |                     | South Asia                                       | 4636.2 (3926.9–5335.6)         | 219% (210.3 to 229.1%)              | 428.4 (365–494)          | 1.6% (0.2 to 3%)                    | 1.08                     |      |
|                     |                     | Sub-Saharan Africa                               | 1703.4 (1467.1–1954.6)         | 123.4% (119.3 to 127.7%)            | 548.3 (470.7–628.6)      | 0.6% (-0.8 to 1.9%)                 | 1.38                     |      |
|                     |                     | World Bank High Income                           | 19475.2 (16835.3–22168.6)      | 118% (111.3 to 124.7%)              | 717.4 (623.9–816.3)      | 2.8% (1 to 4.8%)                    | 1.30                     |      |
|                     |                     | World Bank Upper Middle Income                   | 21910.3 (18485.4–25275.2)      | 222.6% (215.5 to 230.2%)            | 743.5 (629–857.1)        | 16.5% (14.7 to 18.4%)               | 1.25                     |      |
|                     |                     | World Bank Lower Middle Income                   | 8981.6 (7631.5–10351.3)        | 155.1% (151.1 to 159.5%)            | 508.3 (434.1–585.5)      | -4.5% (-5.8 to -3.1%)               | 1.18                     |      |
|                     |                     | World Bank Low Income                            | 1233.3 (1056.8–1416.7)         | 132.3% (127 to 138.2%)              | 576.6 (494.6–661.1)      | 0.8% (-0.7 to 2.4%)                 | 1.35                     |      |
|                     |                     | Global                                           | 8511 (7288.5–9841.4)           | 155.5% (150.4 to 161%)              | 106.3 (91.2–122.2)       | 15.9% (13.3 to 18.5%)               | 0.68                     |      |
|                     |                     | Southeast Asia, East Asia, and Oceania           | 3480.4 (2898.8–4148.4)         | 240.3% (231.2 to 250.4%)            | 135.3 (113.6–159.6)      | 30.2% (26.6 to 34.4%)               | 0.68                     |      |
|                     |                     | Central Europe, Eastern Europe, and Central Asia | 562.8 (481.9–648.2)            | 42.4% (38.2 to 47.8%)               | 87.8 (75.2–101.1)        | 1.7% (-1.5 to 5.2%)                 | 0.65                     |      |
|                     |                     | High-income                                      | 2471.1 (2181.3–2765.5)         | 95.9% (84.3 to 107.6%)              | 108.7 (95.8–121.8)       | 6.9% (1.1 to 12.7%)                 | 0.65                     |      |
|                     |                     | Latin America and Caribbean                      | 512.1 (440.8–590.9)            | 238.2% (228.6 to 248.5%)            | 90.2 (77.7–103.8)        | 19.9% (16.7 to 23%)                 | 0.63                     |      |
|                     |                     | North Africa and Middle East                     | 309.9 (265–362.8)              | 199.5% (188.8 to 211.2%)            | 82.6 (70.2–95.6)         | 15.4% (11.5 to 20%)                 | 0.74                     |      |
|                     |                     | South Asia                                       | 930.1 (770.2–1111.8)           | 216.5% (206.8 to 227.3%)            | 72.7 (60.3–86)           | 16.6% (14.3 to 18.8%)               | 0.76                     |      |
|                     |                     | Sub-Saharan Africa                               | 244.6 (208–288.1)              | 136.7% (131.8 to 142.3%)            | 64.1 (54.4–74.3)         | 9.7% (7.8 to 11.6%)                 | 0.69                     |      |
|                     | Idiopathic epilepsy |                                                  | World Bank High Income         | 2653.5 (2345–2966)                  | 97% (85.1 to 108.9%)     | 109.2 (96.3–122.4)                  | 7.4% (1.5 to 13.3%)      | 0.66 |
|                     |                     |                                                  | World Bank Upper Middle Income | 4016.3 (3358.7–4768)                | 213.3% (205.3 to 222.1%) | 122.4 (102.8–144.2)                 | 29% (25.3 to 32.7%)      | 0.66 |
|                     |                     | World Bank Lower Middle Income                   | 1661.1 (1403–1962.3)           | 167% (162 to 172.6%)                | 78.8 (66.1–92.5)         | 10% (8.3 to 11.7%)                  | 0.75                     |      |
|                     |                     | World Bank Low Income                            | 176 (147.8–206.4)              | 124.2% (116.2 to 133.1%)            | 65.9 (55.4–76.3)         | 3.5% (0 to 7.4%)                    | 0.73                     |      |
|                     |                     | Global                                           | 25111.1 (19033.6–31433)        | 63.9% (39.3 to 93%)                 | 326.3 (247.8–408.3)      | 13% (-3.4 to 31.8%)                 | 0.92                     |      |
|                     |                     | Southeast Asia, East Asia, and Oceania           | 5090.4 (3744.6–6535.6)         | 67.2% (30.1 to 122.6%)              | 242.3 (177.5–311.3)      | 34.4% (5.9 to 77.4%)                | 0.92                     |      |
|                     |                     | Central Europe, Eastern Europe, and Central Asia | 1548.3 (1097.2–1988.8)         | 9.5% (-9.7 to 31.7%)                | 361.6 (254–471.3)        | 7.2% (-11.5 to 29.2%)               | 0.87                     |      |
|                     |                     | High-income                                      | 3930.7 (2702.6–5086.3)         | 33.1% (8.6 to 60%)                  | 336.8 (231.4–442.1)      | 5.2% (-14 to 25.5%)                 | 0.96                     |      |
|                     |                     | Latin America and Caribbean                      | 2897.9 (2115.2–3716.1)         | 44% (14.4 to 83.4%)                 | 496 (361.4–635.8)        | -6% (-24.2 to 20.2%)                | 0.98                     |      |
|                     |                     | North Africa and Middle East                     | 1990.9 (1360.2–2600)           | 77.6% (26.2 to 150.6%)              | 336.9 (231.8–437.4)      | 8.6% (-23 to 52.4%)                 | 0.88                     |      |
|                     |                     | South Asia                                       | 5312.5 (3773.4–6915.7)         | 86.7% (37.8 to 170.5%)              | 300.8 (215.3–386.2)      | 13.1% (-15.6 to 63.6%)              | 0.91                     |      |
|                     |                     | Sub-Saharan Africa                               | 4340.2 (3000.2–5914.1)         | 124.5% (78.1 to 192.8%)             | 414.3 (292.3–544.6)      | 1.9% (-18.9 to 32.4%)               | 0.87                     |      |
|                     |                     | World Bank High Income                           | 4547.3 (3181.3–5876.6)         | 37.1% (13 to 61.4%)                 | 354.6 (244.3–467.2)      | 8.2% (-10.3 to 26.2%)               | 0.94                     |      |
|                     |                     | World Bank Upper Middle Income                   | 8198.2 (6041.5–10387.8)        | 46.1% (19.9 to 79.1%)               | 315.7 (234.1–400.3)      | 17.3% (-3.3 to 42.5%)               | 0.93                     |      |
|                     |                     | World Bank Lower Middle Income                   | 9908.9 (7360.7–12777.3)        | 88.3% (50.6 to 147.4%)              | 317.3 (236.8–405)        | 14.7% (-8.3 to 50.5%)               | 0.91                     |      |
|                     |                     | World Bank Low Income                            | 2441.4 (1579.1–3433.9)         | 117.3% (59.9 to 216%)               | 345.9 (227.7–477.6)      | 0.6% (-26.5 to 46.2%)               | 0.89                     |      |
| Multiple            |                     |                                                  | Global                         | 1756.8 (1531.9–1973.6)              | 71.7% (66.3 to 76.8%)    | 21.3 (18.5–23.9)                    | -6.2% (-8.7 to -3.8%)    | 1.99 |

**Table S10** Global and regional burden, mortality, incidence, and prevalence of neurological conditions in different regions of the world

| Measure               |                                                  | All Ages                        |                                     | Age-standardised          |                                     | Sex ratio |
|-----------------------|--------------------------------------------------|---------------------------------|-------------------------------------|---------------------------|-------------------------------------|-----------|
|                       |                                                  | Number (thousand)<br>2019       | Percent change<br>From 1990 to 2019 | Rate per 100 000<br>2019  | Percent change<br>From 1990 to 2019 |           |
| Cause                 | Region                                           | Mean (95% UI)                   | Mean (95% UI)                       | Mean (95% UI)             | Mean (95% UI)                       | F:M       |
| sclerosis             | Southeast Asia, East Asia, and Oceania           | 64·6 (50·2–80·5)                | 100·1% (86·8 to 112·7%)             | 2·5 (1·9–3·1)             | 19·9% (18 to 22%)                   | 1·45      |
|                       | Central Europe, Eastern Europe, and Central Asia | 146·3 (126–166·5)               | 8·3% (6·2 to 10·2%)                 | 28·4 (24·3–32·5)          | -5% (-6·5 to -3·4%)                 | 1·32      |
|                       | High-income                                      | 1062·1 (957·9–1169·8)           | 59·1% (50·7 to 66·6%)               | 74·5 (66·8–82·5)          | 17·5% (11·8 to 22·8%)               | 2·21      |
|                       | Latin America and Caribbean                      | 78·5 (63–94·1)                  | 160·7% (152 to 168·7%)              | 12·7 (10·2–15·2)          | 20·6% (18·5 to 22·8%)               | 1·97      |
|                       | North Africa and Middle East                     | 222·7 (190·7–256·8)             | 171·3% (165·8 to 176·5%)            | 39 (33·6–44·7)            | 11·5% (10 to 12·8%)                 | 1·98      |
|                       | South Asia                                       | 136·6 (107·6–167·8)             | 135·4% (129·8 to 140·7%)            | 8 (6·3–9·7)               | 14·3% (13 to 15·8%)                 | 1·76      |
|                       | Sub-Saharan Africa                               | 45·9 (35·9–56·8)                | 158·3% (154·6 to 162·4%)            | 6·2 (4·9–7·5)             | 11·2% (9·8 to 13%)                  | 2·20      |
|                       | World Bank High Income                           | 1114·9 (1002·9–1227·9)          | 59·1% (51 to 66·3%)                 | 70·3 (63–78)              | 14·9% (9·6 to 19·9%)                | 2·23      |
|                       | World Bank Upper Middle Income                   | 339·1 (286·7–392·3)             | 85·3% (80·4 to 90·1%)               | 10·4 (8·8–12·1)           | 5·9% (4·2 to 7·6%)                  | 1·69      |
|                       | World Bank Lower Middle Income                   | 266·3 (212·1–325·1)             | 112·4% (108·8 to 116·1%)            | 9·1 (7·3–11)              | 2·7% (1·2 to 4·1%)                  | 1·74      |
|                       | World Bank Low Income                            | 35·5 (28–43·8)                  | 161·6% (156·9 to 168%)              | 7·2 (5·8–8·7)             | 14·4% (12·6 to 16·7%)               | 1·97      |
| Migraine              | Global                                           | 1128087·3 (979598·8–1298138·1)  | 56·3% (52·3 to 60·5%)               | 14107·3 (12270·3–16239)   | 1·7% (0·7 to 2·8%)                  | 1·73      |
|                       | Southeast Asia, East Asia, and Oceania           | 310834·2 (270520·3–360356·1)    | 49·2% (41·7 to 57%)                 | 13058·2 (11309·8–15039·5) | 6·9% (4·5 to 9·6%)                  | 1·70      |
|                       | Central Europe, Eastern Europe, and Central Asia | 61838·4 (54163·3–71248·3)       | 3·1% (0·8 to 5·3%)                  | 13767 (11945·1–15870·9)   | -0·4% (-0·8 to -0·1%)               | 1·89      |
|                       | High-income                                      | 177198·5 (154611·4–205095·8)    | 16·7% (13·4 to 20·2%)               | 15898 (13829·5–18359·3)   | 0·8% (-0·6 to 2·2%)                 | 2·08      |
|                       | Latin America and Caribbean                      | 90994 (78883–106306·2)          | 62·7% (56·4 to 69·6%)               | 14973·8 (12981–17494·5)   | 2% (0·1 to 3·9%)                    | 1·99      |
|                       | North Africa and Middle East                     | 96931·5 (83756·7–112609·4)      | 100·9% (92·7 to 108·8%)             | 15355 (13305·5–17806)     | -0·1% (-1·5 to 1·4%)                | 1·76      |
|                       | South Asia                                       | 272364·6 (235734–313550·1)      | 84·9% (78·2 to 91·4%)               | 14665·7 (12739–16845·3)   | 0% (-2·7 to 2·9%)                   | 1·56      |
|                       | Sub-Saharan Africa                               | 117926·2 (100150·9–138972·4)    | 134·6% (132 to 137·4%)              | 12277·2 (10570–14226·1)   | 0·8% (-0·1 to 1·8%)                 | 1·56      |
|                       | World Bank High Income                           | 196511·3 (171633·9–227483·1)    | 18·8% (15·5 to 22·2%)               | 15744·2 (13686·9–18125·7) | 0·5% (-0·8 to 1·8%)                 | 2·05      |
|                       | World Bank Upper Middle Income                   | 381854·1 (332207·5–442329)      | 44·5% (38·1 to 51·5%)               | 13318·2 (11581·9–15401)   | 6·3% (4·2 to 8·6%)                  | 1·81      |
|                       | World Bank Lower Middle Income                   | 476963 (412558·5–549991·2)      | 83·2% (78·1 to 88·3%)               | 14807·7 (12872–17010·8)   | -0·2% (-1·8 to 1·6%)                | 1·59      |
| World Bank Low Income | 72108·8 (60626–85649·5)                          | 128·9% (127·4 to 130·4%)        | 11518·6 (9835·6–13421·6)            | 0·8% (0·3 to 1·4%)        | 1·60                                |           |
| Tension-type headache | Global                                           | 1995172·5 (1751946·8–2242204·9) | 52·6% (49·2 to 55·9%)               | 25113·5 (22020·8–28316·2) | -0·8% (-1·5 to 0%)                  | 1·06      |
|                       | Southeast Asia, East Asia, and Oceania           | 474689·4 (417821·5–533103·3)    | 43·5% (36·1 to 51·1%)               | 20786·3 (18180·6–23472·7) | 5·6% (3·4 to 8·3%)                  | 1·15      |
|                       | Central Europe, Eastern Europe, and Central Asia | 139748·9 (124072·5–155545·9)    | 2·3% (-0·3 to 5·1%)                 | 31756·6 (28039·7–35733·2) | 0% (-1·1 to 1·2%)                   | 1·05      |
|                       | High-income                                      | 374424·5 (333244·3–416231·4)    | 20% (16·7 to 23·4%)                 | 32263·7 (28503·7–36000)   | 0% (-1 to 1·3%)                     | 1·09      |
|                       | Latin America and Caribbean                      | 155507·4 (135667·9–175082·9)    | 61% (54·6 to 67·3%)                 | 25764·8 (22483·8–29108)   | -0·8% (-1·9 to 0·4%)                | 1·03      |
|                       | North Africa and Middle East                     | 149061·7 (128455·9–170990·9)    | 102·2% (93·5 to 111%)               | 24504·5 (21304·8–27987·5) | 2% (0·7 to 3·4%)                    | 1·02      |

**Table S10** Global and regional burden, mortality, incidence, and prevalence of neurological conditions in different regions of the world

| Measure                        |                                                  | All Ages                        |                          | Age-standardised          |                       | Sex ratio |
|--------------------------------|--------------------------------------------------|---------------------------------|--------------------------|---------------------------|-----------------------|-----------|
|                                |                                                  | Number (thousand)               | Percent change           | Rate per 100 000          | Percent change        |           |
| Cause                          | Region                                           | 2019                            | From 1990 to 2019        | 2019                      | From 1990 to 2019     | 2019      |
|                                |                                                  | Mean (95% UI)                   | Mean (95% UI)            | Mean (95% UI)             | Mean (95% UI)         | F:M       |
| Motor neuron disease           | South Asia                                       | 481422.4 (421988.6–544314.7)    | 83.8% (79.8 to 87.8%)    | 26254.7 (23110.1–29418.7) | -0.1% (-0.5 to 0.3%)  | 0.99      |
|                                | Sub-Saharan Africa                               | 220318.3 (187735.8–255957.4)    | 129.9% (128.4 to 131.4%) | 23094.2 (20058–26210.8)   | -0.7% (-1.1 to -0.4%) | 1.01      |
|                                | World Bank High Income                           | 407166.5 (362328.9–453198.5)    | 20.7% (17.3 to 24%)      | 31474.7 (27779.7–35146.1) | -1.1% (-2.1 to 0%)    | 1.10      |
|                                | World Bank Upper Middle Income                   | 624591.3 (550243.3–698925.7)    | 38.7% (32.5 to 44.9%)    | 22303.2 (19499.4–25184.3) | 3% (1.3 to 5.1%)      | 1.11      |
|                                | World Bank Lower Middle Income                   | 826372.9 (721726.7–936807.4)    | 80.3% (76.6 to 84%)      | 26042.8 (22872.1–29328.5) | -0.9% (-1.2 to -0.6%) | 1.01      |
|                                | World Bank Low Income                            | 135924.1 (113741.4–159753.3)    | 123.9% (122.2 to 125.7%) | 21687.4 (18624.2–24822.1) | -0.8% (-1.3 to -0.2%) | 1.01      |
|                                | Global                                           | 268.7 (231.9–310.7)             | 68.9% (62.5 to 75.7%)    | 3.4 (2.9–3.9)             | 1.9% (0.6 to 3.4%)    | 0.82      |
|                                | Southeast Asia, East Asia, and Oceania           | 55.1 (45.1–67.2)                | 47% (36.3 to 59.8%)      | 2.4 (2–3)                 | 9.6% (7.8 to 11.7%)   | 0.93      |
|                                | Central Europe, Eastern Europe, and Central Asia | 14.8 (12.5–17.6)                | 6.7% (2.5 to 11.4%)      | 3.4 (2.8–4.1)             | 4% (2.4 to 5.7%)      | 0.99      |
|                                | High-income                                      | 121.3 (107.8–135)               | 77.5% (70.5 to 84.7%)    | 7.7 (6.9–8.6)             | 19.4% (15.8 to 24%)   | 0.76      |
|                                | Latin America and Caribbean                      | 15.3 (12.8–18.3)                | 77% (65.6 to 90.1%)      | 2.6 (2.2–3.1)             | 11.3% (8.7 to 14.2%)  | 0.95      |
|                                | North Africa and Middle East                     | 15.6 (12.7–19)                  | 103.3% (92.1 to 113.8%)  | 2.6 (2.1–3.1)             | 3.5% (2 to 5.1%)      | 0.86      |
|                                | South Asia                                       | 32.4 (25.6–40.7)                | 92% (86 to 98.6%)        | 1.8 (1.4–2.2)             | 10.3% (8.7 to 12.1%)  | 0.87      |
|                                | Sub-Saharan Africa                               | 14.2 (11.2–17.9)                | 129.7% (126.5 to 132.6%) | 1.5 (1.2–1.9)             | 2.5% (1.8 to 3.1%)    | 0.89      |
| Other neurological disorders   | World Bank High Income                           | 125.4 (111.5–139.9)             | 75.4% (68.5 to 82.4%)    | 7.4 (6.6–8.2)             | 17.7% (14.4 to 21.9%) | 0.77      |
|                                | World Bank Upper Middle Income                   | 77.3 (63.8–93.7)                | 46.9% (37.1 to 58%)      | 2.8 (2.3–3.4)             | 10.1% (8.5 to 11.9%)  | 0.93      |
|                                | World Bank Lower Middle Income                   | 56.1 (44.8–70.2)                | 84.2% (78.2 to 90.5%)    | 1.8 (1.4–2.2)             | 5.4% (4.6 to 6.3%)    | 0.89      |
|                                | World Bank Low Income                            | 9.6 (7.6–11.9)                  | 120% (115.7 to 124%)     | 1.6 (1.3–1.9)             | 1.2% (0.1 to 2.4%)    | 0.89      |
|                                | Global                                           | 56.9 (39.1–77.8)                | 66.3% (56.8 to 77%)      | 0.7 (0.5–1)               | 6.4% (3.6 to 9.5%)    | 0.82      |
|                                | Southeast Asia, East Asia, and Oceania           | 7.2 (4.8–10.2)                  | 46.8% (29 to 66.9%)      | 0.3 (0.2–0.5)             | 9.8% (5.7 to 14.4%)   | 0.90      |
|                                | Central Europe, Eastern Europe, and Central Asia | 3 (2–4.2)                       | 5.6% (0.4 to 11.2%)      | 0.7 (0.4–0.9)             | 0.2% (-1 to 1.6%)     | 0.89      |
|                                | High-income                                      | 17.5 (11.7–23.7)                | 64.4% (51.3 to 80%)      | 1.3 (0.9–1.7)             | 15.9% (9.4 to 23.5%)  | 0.82      |
|                                | Latin America and Caribbean                      | 5.7 (3.8–7.8)                   | 51.3% (40 to 64.9%)      | 1 (0.7–1.3)               | -10.7% (-17 to -5%)   | 0.76      |
|                                | North Africa and Middle East                     | 3.9 (2.6–5.5)                   | 96.6% (81 to 113.8%)     | 0.7 (0.5–1)               | 0.3% (-0.9 to 1.5%)   | 1.00      |
|                                | South Asia                                       | 11.5 (7.8–15.9)                 | 80.3% (66.6 to 94.8%)    | 0.7 (0.5–0.9)             | 1.4% (-2.9 to 5.6%)   | 0.76      |
|                                | Sub-Saharan Africa                               | 8.1 (5.4–11.3)                  | 119.3% (114.9 to 123.9%) | 0.8 (0.6–1.2)             | -1% (-1.4 to -0.5%)   | 0.84      |
|                                | World Bank High Income                           | 18 (12.1–24.5)                  | 64.1% (51.1 to 79.7%)    | 1.2 (0.8–1.6)             | 15.1% (8.8 to 22.6%)  | 0.83      |
|                                | World Bank Upper Middle Income                   | 14.4 (9.7–20)                   | 43.2% (30.5 to 56.8%)    | 0.5 (0.4–0.7)             | 4.3% (0.9 to 7.9%)    | 0.87      |
| World Bank Lower Middle Income | 20 (13.5–27.7)                                   | 80.1% (69.7 to 91.3%)           | 0.7 (0.4–0.9)            | 3.1% (0.4 to 5.7%)        | 0.82                  |           |
| World Bank Low Income          | 4.3 (2.9–6.1)                                    | 118.7% (113.6 to 124.2%)        | 0.7 (0.5–0.9)            | 1.6% (0.9 to 2.3%)        | 0.89                  |           |
| Headache disorders             | Global                                           | 2602898.1 (2396738.3–2805119.6) | 54% (51.5 to 56.5%)      | 32716.8 (30148.4–35335)   | 0.2% (-0.3 to 0.8%)   | 1.20      |
|                                | Southeast Asia, East Asia, and Oceania           | 668443.8 (615598.4–720601.6)    | 44.2% (39.1 to 49.5%)    | 28868.6 (26461.8–31286.3) | 5.2% (3.7 to 7%)      | 1.27      |
|                                | Central Europe, Eastern Europe, and Central Asia | 166128.1 (153146.5–178791.1)    | 2.8% (1.2 to 4.6%)       | 37506 (34525.4–40423.8)   | 0% (-0.6 to 0.8%)     | 1.18      |



**Table S10** Global and regional burden, mortality, incidence, and prevalence of neurological conditions in different regions of the world

| Measure                                   |                                                  | All Ages                       |                          | Age-standardised          |                          | Sex ratio |
|-------------------------------------------|--------------------------------------------------|--------------------------------|--------------------------|---------------------------|--------------------------|-----------|
|                                           |                                                  | Number (thousand)              | Percent change           | Rate per 100 000          | Percent change           |           |
| Cause                                     | Region                                           | 2019                           | From 1990 to 2019        | 2019                      | From 1990 to 2019        | 2019      |
|                                           |                                                  | Mean (95% UI)                  | Mean (95% UI)            | Mean (95% UI)             | Mean (95% UI)            | F:M       |
|                                           | High-income                                      | 445981·2 (412399·9–477975)     | 20% (17·8 to 22%)        | 38660·3 (35647·5–41594·4) | 0·4% (-0·3 to 1·1%)      | 1·24      |
|                                           | Latin America and Caribbean                      | 204541·3 (188760·4–221579)     | 61·7% (57·5 to 65·6%)    | 33858·3 (31282·1–36692·1) | 0·2% (-0·6 to 1%)        | 1·23      |
|                                           | North Africa and Middle East                     | 205280·4 (186994·5–223750·1)   | 100·9% (95·4 to 106·3%)  | 33389·7 (30530·9–36328·1) | 1·3% (0·5 to 2·2%)       | 1·19      |
|                                           | South Asia                                       | 625189·3 (573755·6–676224·4)   | 83·5% (80·4 to 86·7%)    | 34008·4 (31276·1–36720·4) | -0·1% (-0·9 to 0·7%)     | 1·12      |
|                                           | Sub-Saharan Africa                               | 287333·9 (258492·8–316694·9)   | 131% (129·7 to 132·2%)   | 29968·5 (27357·4–32625·5) | -0·3% (-0·6 to 0·1%)     | 1·13      |
|                                           | World Bank High Income                           | 489368·8 (452237·2–525167·9)   | 21·1% (19 to 23·2%)      | 38069·5 (35083·1–40952·7) | -0·3% (-1 to 0·4%)       | 1·24      |
|                                           | World Bank Upper Middle Income                   | 851904·5 (785822·5–918508·7)   | 40% (35·8 to 44·6%)      | 30187·3 (27747·4–32604·4) | 3·6% (2·3 to 5·1%)       | 1·26      |
|                                           | World Bank Lower Middle Income                   | 1081546·1 (991376·7–1172010·4) | 80·9% (78·1 to 83·6%)    | 33954·8 (31261·2–36715·9) | -0·6% (-1·1 to -0·1%)    | 1·14      |
|                                           | World Bank Low Income                            | 178601·6 (158915·2–198547·4)   | 125·1% (123·8 to 126·4%) | 28435·4 (25758–31187·2)   | -0·3% (-0·7 to 0·1%)     | 1·14      |
| <b>YLDs (Years Lived with Disability)</b> |                                                  |                                |                          |                           |                          |           |
| Meningitis                                | Global                                           | 683·3 (480·9–924·3)            | -19·2% (-22·5 to -15·4%) | 9 (6·3–12·2)              | -41·2% (-43·6 to -38·4%) | 1·02      |
|                                           | Southeast Asia, East Asia, and Oceania           | 62·6 (43·3–85)                 | -62·9% (-65·2 to -60·2%) | 3·1 (2·1–4·2)             | -68% (-69·7 to -65·8%)   | 0·91      |
|                                           | Central Europe, Eastern Europe, and Central Asia | 22·3 (15·6–29·9)               | -42% (-44·9 to -39%)     | 5·6 (3·9–7·6)             | -39·5% (-42·7 to -36·3%) | 0·99      |
|                                           | High-income                                      | 28·3 (19·7–37·5)               | -46·2% (-48·6 to -43·7%) | 2·5 (1·8–3·3)             | -56·5% (-58·4 to -54·6%) | 0·92      |
|                                           | Latin America and Caribbean                      | 23·4 (16·6–31)                 | -27·3% (-31·9 to -22·2%) | 3·9 (2·8–5·2)             | -51·6% (-54·4 to -48·4%) | 1·01      |
|                                           | North Africa and Middle East                     | 36·2 (25·1–48·7)               | 17·1% (9·2 to 26·8%)     | 6 (4·2–8)                 | -34·6% (-39 to -29·4%)   | 1·16      |
|                                           | South Asia                                       | 254·4 (178·2–346)              | -20·2% (-25·9 to -13·5%) | 13·9 (9·7–18·7)           | -51·3% (-54·7 to -47·2%) | 1·09      |
|                                           | Sub-Saharan Africa                               | 256·1 (179·2–347·5)            | 25·5% (17·9 to 35·4%)    | 23·8 (17–31·9)            | -42·5% (-45·7 to -38·3%) | 0·95      |
|                                           | World Bank High Income                           | 31·7 (22·2–42)                 | -44·4% (-46·8 to -42·1%) | 2·6 (1·8–3·4)             | -55·2% (-57·1 to -53·4%) | 0·92      |
|                                           | World Bank Upper Middle Income                   | 75·6 (53–100·7)                | -58·1% (-60·6 to -55%)   | 2·9 (2–3·9)               | -65·4% (-67·3 to -63%)   | 1·03      |
|                                           | World Bank Lower Middle Income                   | 400·9 (280·5–544·6)            | -14·8% (-19·6 to -9%)    | 12·4 (8·7–16·7)           | -48% (-50·8 to -44·4%)   | 1·04      |
| World Bank Low Income                     | 174·7 (123·7–236·7)                              | 27·4% (17·9 to 39·5%)          | 24·9 (17·8–33·3)         | -39·8% (-43·9 to -34·4%)  | 0·95                     |           |
| Encephalitis                              | Global                                           | 482·4 (343·3–647·3)            | 5·2% (0·7 to 9·8%)       | 6·1 (4·4–8·3)             | -28·8% (-31·6 to -25·6%) | 1·03      |
|                                           | Southeast Asia, East Asia, and Oceania           | 131·8 (91·3–177·7)             | -23·9% (-29·6 to -17·9%) | 5·9 (4·1–8)               | -40·5% (-44·6 to -36%)   | 0·92      |
|                                           | Central Europe, Eastern Europe, and Central Asia | 10·7 (7·5–14·4)                | -9% (-13 to -5·7%)       | 2·5 (1·7–3·4)             | -9·8% (-13·4 to -6·6%)   | 0·91      |
|                                           | High-income                                      | 16·3 (11·4–21·8)               | 1·3% (-2·1 to 4·5%)      | 1·3 (0·9–1·8)             | -21·8% (-24·2 to -19·6%) | 1·18      |
|                                           | Latin America and Caribbean                      | 19·5 (13·5–26·4)               | 10·4% (4·6 to 16·8%)     | 3·3 (2·3–4·4)             | -29·1% (-33 to -25·1%)   | 1·23      |
|                                           | North Africa and Middle East                     | 19·8 (13·8–26·8)               | 84·9% (76·6 to 93·9%)    | 3·2 (2·2–4·3)             | -4·1% (-8·1 to 0·4%)     | 1·35      |
|                                           | South Asia                                       | 228·4 (163·3–307·1)            | 12% (5·1 to 18·9%)       | 12·9 (9·2–17·2)           | -37·1% (-40·6 to -33·4%) | 1·07      |
|                                           | Sub-Saharan Africa                               | 55·8 (39–75·8)                 | 119·5% (109·1 to 130·7%) | 5·7 (4·7–7)               | -4% (-8·4 to 0·5%)       | 1·03      |
|                                           | World Bank High Income                           | 17·7 (12·4–23·7)               | 1·2% (-2·2 to 4·6%)      | 1·3 (0·9–1·7)             | -22·4% (-24·9 to -20·1%) | 1·18      |
|                                           | World Bank Upper Middle Income                   | 140·2 (97·2–189·2)             | -21·4% (-27·1 to -15·4%) | 5·1 (3·6–6·9)             | -38·3% (-42·7 to -33·8%) | 0·97      |
|                                           | World Bank Lower Middle Income                   | 281 (199·4–376·4)              | 15·7% (9·3 to 22·1%)     | 9 (6·4–12·1)              | -34% (-37·5 to -30·6%)   | 1·04      |

**Table S10** Global and regional burden, mortality, incidence, and prevalence of neurological conditions in different regions of the world

| Measure                                          | Region                                           | All Ages                  | Age-standardised                    |                          |                                     |                          |
|--------------------------------------------------|--------------------------------------------------|---------------------------|-------------------------------------|--------------------------|-------------------------------------|--------------------------|
|                                                  |                                                  | Number (thousand)<br>2019 | Percent change<br>From 1990 to 2019 | Rate per 100 000<br>2019 | Percent change<br>From 1990 to 2019 | Sex ratio<br>2019        |
| Cause                                            |                                                  | Mean (95% UI)             | Mean (95% UI)                       | Mean (95% UI)            | Mean (95% UI)                       | F:M                      |
| Tetanus                                          | World Bank Low Income                            | 43·3 (30·1–58·9)          | 118·4% (105·5 to 131·8%)            | 6·8 (4·8–9·2)            | -0·8% (-6·5 to 5·2%)                | 1·04                     |
|                                                  | Global                                           | 1·7 (1–2·7)               | -76·5% (-81·8 to -71%)              | <0·1 (<0·1–<0·1)         | -81·7% (-85·3 to -77·9%)            | 0·94                     |
|                                                  | Southeast Asia, East Asia, and Oceania           | 0·4 (0·2–0·6)             | -83·5% (-87·6 to -79·7%)            | <0·1 (<0·1–<0·1)         | -86·8% (-89·8 to -83·8%)            | 1·12                     |
|                                                  | Central Europe, Eastern Europe, and Central Asia | <0·1 (<0·1–<0·1)          | -83·9% (-87·8 to -66·5%)            | <0·1 (<0·1–<0·1)         | -86·1% (-89·4 to -72·7%)            | 0·65                     |
|                                                  | High-income                                      | <0·1 (<0·1–<0·1)          | -79% (-83·7 to -60·2%)              | <0·1 (<0·1–<0·1)         | -87·2% (-90·2 to -76%)              | 0·62                     |
|                                                  | Latin America and Caribbean                      | <0·1 (<0·1–<0·1)          | -79·2% (-85·7 to -70%)              | <0·1 (<0·1–<0·1)         | -86·3% (-90·4 to -80·5%)            | 0·73                     |
|                                                  | North Africa and Middle East                     | <0·1 (<0·1–<0·1)          | -70·2% (-81·9 to -50·5%)            | <0·1 (<0·1–<0·1)         | -80·9% (-87·4 to -70·7%)            | 0·71                     |
|                                                  | South Asia                                       | 0·9 (0·5–1·4)             | -80·1% (-85·3 to -74·7%)            | <0·1 (<0·1–0·1)          | -85·2% (-88·4 to -82·3%)            | 1·01                     |
|                                                  | Sub-Saharan Africa                               | 0·5 (0·3–0·7)             | -35·7% (-54·2 to -16·8%)            | <0·1 (<0·1–0·1)          | -67·5% (-75·4 to -60%)              | 0·76                     |
|                                                  | World Bank High Income                           | <0·1 (<0·1–<0·1)          | -74·8% (-82·3 to -64·5%)            | <0·1 (<0·1–<0·1)         | -82·7% (-89·2 to -74·4%)            | 0·68                     |
|                                                  | World Bank Upper Middle Income                   | 0·1 (0·1–0·2)             | -90·7% (-93·5 to -87·5%)            | <0·1 (<0·1–<0·1)         | -92·8% (-94·9 to -90·2%)            | 0·76                     |
|                                                  | World Bank Lower Middle Income                   | 1·3 (0·8–2·1)             | -76·2% (-81·9 to -70·6%)            | <0·1 (<0·1–0·1)          | -83·2% (-86·5 to -80·2%)            | 0·98                     |
|                                                  | Brain and central nervous system cancer          | World Bank Low Income     | 0·3 (0·2–0·4)                       | -50·4% (-65·3 to -27·5%) | <0·1 (<0·1–0·1)                     | -70·7% (-78·4 to -61·8%) |
| Global                                           |                                                  | 129·4 (83·9–175)          | 118·1% (34·2 to 156·9%)             | 1·6 (1·1–2·2)            | 29·5% (-18·9 to 52%)                | 0·86                     |
| Southeast Asia, East Asia, and Oceania           |                                                  | 43·1 (28·2–60·1)          | 150% (62·5 to 225·7%)               | 1·8 (1·2–2·5)            | 56·5% (1·1 to 101·5%)               | 1·14                     |
| Central Europe, Eastern Europe, and Central Asia |                                                  | 8·6 (5·5–11·8)            | 47·1% (-3·7 to 70·6%)               | 1·7 (1·1–2·3)            | 27·7% (-16·2 to 48%)                | 0·71                     |
| High-income                                      |                                                  | 44 (26·9–60·8)            | 96·9% (19·3 to 135·8%)              | 3 (1·8–4·1)              | 34·9% (-16·1 to 60·9%)              | 0·78                     |
| Latin America and Caribbean                      |                                                  | 7·6 (4·7–10·7)            | 189·3% (40·8 to 280·8%)             | 1·3 (0·8–1·8)            | 61·4% (-21·5 to 113%)               | 0·82                     |
| North Africa and Middle East                     |                                                  | 10·6 (6·2–15)             | 203·1% (78·6 to 311·3%)             | 1·9 (1·1–2·7)            | 55·6% (-2·6 to 105·3%)              | 0·78                     |
| South Asia                                       |                                                  | 11·2 (7·4–15·4)           | 87·5% (12·1 to 159·7%)              | 0·7 (0·4–0·9)            | 14·4% (-27·1 to 49·2%)              | 0·69                     |
| Sub-Saharan Africa                               |                                                  | 4·2 (2·6–5·9)             | 137·8% (31 to 263·7%)               | 0·5 (0·3–0·7)            | 20% (-28·3 to 66·9%)                | 0·69                     |
| World Bank High Income                           |                                                  | 46·7 (28·5–64·4)          | 96·5% (19·5 to 133·9%)              | 2·9 (1·8–4)              | 34·1% (-16·6 to 59%)                | 0·78                     |
| World Bank Upper Middle Income                   |                                                  | 57·5 (37·5–78·7)          | 149·4% (55·4 to 201·3%)             | 2 (1·3–2·7)              | 60·6% (-0·4 to 94·4%)               | 1·03                     |
| World Bank Lower Middle Income                   |                                                  | 22 (14·5–29·7)            | 100·8% (22·3 to 158·6%)             | 0·8 (0·5–1)              | 17·2% (-23 to 43·7%)                | 0·75                     |
| Stroke                                           |                                                  | World Bank Low Income     | 3·1 (2–4·4)                         | 105·2% (18·2 to 218·8%)  | 0·6 (0·4–0·8)                       | 8·9% (-33 to 52·6%)      |
|                                                  | Global                                           | 17741·7 (12759·4–22587·4) | 88·9% (85·3 to 92·7%)               | 218·1 (156·7–277)        | -4·7% (-6·1 to -3·3%)               | 1·30                     |
|                                                  | Southeast Asia, East Asia, and Oceania           | 8389·8 (5940·5–10818·6)   | 140·2% (128·4 to 152·7%)            | 320·7 (227–412)          | 11·3% (6·9 to 16%)                  | 1·30                     |
|                                                  | Central Europe, Eastern Europe, and Central Asia | 1495·7 (1077·1–1904·4)    | 1·7% (0 to 3·4%)                    | 252·2 (181·4–321·6)      | -19·3% (-20·9 to -17·9%)            | 1·33                     |
|                                                  | High-income                                      | 3150·8 (2286–3990·4)      | 41·2% (37·5 to 45%)                 | 163·6 (118·1–206·4)      | -14·4% (-16·7 to -12·3%)            | 1·26                     |
|                                                  | Latin America and Caribbean                      | 631·8 (465·1–796·2)       | 76·3% (72·9 to 80·3%)               | 107·1 (78·6–134·9)       | -25·7% (-27·2 to -24·2%)            | 1·37                     |
|                                                  | North Africa and Middle East                     | 1113·7 (812·1–1400·8)     | 140·2% (135·3 to 145·3%)            | 239·4 (176·1–301·4)      | -0·7% (-2·6 to 1·2%)                | 1·43                     |
|                                                  | South Asia                                       | 1902·1 (1371·3–2435·5)    | 120·3% (115·5 to 125·7%)            | 121·3 (87·8–155·1)       | 0·2% (-1·4 to 1·8%)                 | 1·25                     |
|                                                  | Sub-Saharan Africa                               | 1057·8 (768·3–1329·3)     | 107·2% (104·3 to 110%)              | 187·1 (137·2–234·9)      | -7·6% (-8·6 to -6·5%)               | 1·37                     |
|                                                  | World Bank High Income                           | 3545·8 (2568·3–4486·7)    | 40·6% (37·1 to 44·2%)               | 171·8 (124·1–216·4)      | -14·7% (-16·9 to -12·7%)            | 1·27                     |
|                                                  | World Bank Upper Middle Income                   | 8583·8 (6097·7–10998·2)   | 106·9% (97·7 to 116·6%)             | 261·1 (185·2–335·2)      | 0·1% (-3·6 to 4%)                   | 1·32                     |
|                                                  | World Bank Lower Middle Income                   | 4868·4 (3489–6186·2)      | 107·1% (104·4 to 109·8%)            | 188·2 (135·3–238·9)      | -4·9% (-6 to -3·8%)                 | 1·27                     |



**Table S10** Global and regional burden, mortality, incidence, and prevalence of neurological conditions in different regions of the world

| Measure                                          | Cause                                            | Region                                 | All Ages                  |                                     | Age-standardised         |                                     | Sex ratio<br>2019<br>F:M |
|--------------------------------------------------|--------------------------------------------------|----------------------------------------|---------------------------|-------------------------------------|--------------------------|-------------------------------------|--------------------------|
|                                                  |                                                  |                                        | Number (thousand)<br>2019 | Percent change<br>From 1990 to 2019 | Rate per 100 000<br>2019 | Percent change<br>From 1990 to 2019 |                          |
|                                                  |                                                  |                                        | Mean (95% UI)             | Mean (95% UI)                       | Mean (95% UI)            | Mean (95% UI)                       |                          |
| Ischaemic stroke                                 | World Bank Low Income                            | 735.4 (533.3–923.5)                    | 101.4% (97.7 to 105%)     | 196.6 (144.5–244.5)                 | -7.2% (-8.7 to -5.6%)    | 1.40                                |                          |
|                                                  | Global                                           | 13128.5 (9349.9–16930.4)               | 102% (97.4 to 106.9%)     | 162.3 (115.8–209.9)                 | 0.1% (-1.8 to 2%)        | 1.36                                |                          |
|                                                  | Southeast Asia, East Asia, and Oceania           | 6400.7 (4450.5–8359.1)                 | 182.5% (166 to 200.2%)    | 248.5 (174.6–323.6)                 | 27.3% (21.1 to 34.3%)    | 1.45                                |                          |
|                                                  | Central Europe, Eastern Europe, and Central Asia | 1128.4 (809.8–1465.6)                  | 2% (-0.3 to 4%)           | 187.2 (133.9–241.9)                 | -20.4% (-22.3 to -18.7%) | 1.39                                |                          |
|                                                  | High-income                                      | 2376.4 (1723.7–3030.4)                 | 39.2% (34.7 to 43.7%)     | 119 (85.4–152.7)                    | -17.3% (-20 to -14.5%)   | 1.16                                |                          |
|                                                  | Latin America and Caribbean                      | 433.3 (313.9–550)                      | 80.9% (76.3 to 86.1%)     | 74.3 (53.9–94.5)                    | -25.7% (-27.6 to -23.8%) | 1.24                                |                          |
|                                                  | North Africa and Middle East                     | 877.3 (639.8–1114.1)                   | 157.6% (151.5 to 164.4%)  | 195.6 (144.4–249.1)                 | 5.2% (2.8 to 7.6%)       | 1.45                                |                          |
|                                                  | South Asia                                       | 1172.1 (824.7–1509.8)                  | 133.9% (126.5 to 141.8%)  | 76.2 (53.6–98.6)                    | 5.2% (3.2 to 7.1%)       | 1.21                                |                          |
|                                                  | Sub-Saharan Africa                               | 740.3 (529.9–939.5)                    | 118.6% (115.6 to 121.9%)  | 133.4 (95.8–168.6)                  | -2% (-3.1 to -0.8%)      | 1.52                                |                          |
|                                                  | World Bank High Income                           | 2688.1 (1950.5–3434.5)                 | 39% (34.8 to 43.3%)       | 125.9 (90.2–161.3)                  | -17.3% (-19.8 to -14.7%) | 1.19                                |                          |
|                                                  | World Bank Upper Middle Income                   | 6780.2 (4777.2–8828)                   | 134.9% (122.7 to 148.3%)  | 207.4 (145.3–269.1)                 | 11.1% (6.3 to 16.6%)     | 1.43                                |                          |
|                                                  | World Bank Lower Middle Income                   | 3143.5 (2221.3–4045.7)                 | 118.4% (114.6 to 122%)    | 125.4 (89.6–162.6)                  | -1.3% (-2.8 to 0.3%)     | 1.34                                |                          |
|                                                  | World Bank Low Income                            | 511.1 (367.9–645.6)                    | 116% (111.5 to 120.9%)    | 140.3 (102.7–176.6)                 | -0.8% (-2.9 to 1.1%)     | 1.59                                |                          |
|                                                  | Intracerebral haemorrhage                        | Global                                 | 3266.3 (2334–4173.7)      | 57.2% (54.9 to 59.5%)               | 39.4 (28.1–50.2)         | -17.7% (-19.2 to -16.1%)            | 0.99                     |
| Southeast Asia, East Asia, and Oceania           |                                                  | 1521 (1080.1–1970.3)                   | 60.4% (56.5 to 64.5%)     | 54.7 (38.8–70.7)                    | -23.7% (-26.3 to -21.2%) | 0.81                                |                          |
| Central Europe, Eastern Europe, and Central Asia |                                                  | 222 (157.2–287.6)                      | -3.4% (-6.2 to -0.8%)     | 39.3 (27.6–50.4)                    | -19.2% (-21.9 to -16.6%) | 0.96                                |                          |
| High-income                                      |                                                  | 352.5 (252–452.3)                      | 24.9% (21.1 to 28.8%)     | 20.6 (14.6–26.2)                    | -18.5% (-21 to -16.1%)   | 1.19                                |                          |
| Latin America and Caribbean                      |                                                  | 135.9 (97.9–173.8)                     | 57.6% (51.9 to 63.1%)     | 22.6 (16.3–28.9)                    | -30.3% (-32.7 to -27.8%) | 1.62                                |                          |
| North Africa and Middle East                     |                                                  | 182.2 (129.1–229.6)                    | 88.9% (82.6 to 95.8%)     | 34.4 (24.4–43.5)                    | -21.5% (-24.2 to -18.4%) | 1.26                                |                          |
| South Asia                                       |                                                  | 578.9 (410.1–750)                      | 104.7% (99.4 to 110.3%)   | 36.2 (25.7–46.9)                    | -6.9% (-9.2 to -4.4%)    | 1.34                                |                          |
| Sub-Saharan Africa                               |                                                  | 273.8 (197.3–342.1)                    | 80.1% (76 to 84.3%)       | 46.7 (33.7–59)                      | -20.7% (-22.2 to -19.1%) | 1.02                                |                          |
| World Bank High Income                           |                                                  | 406.7 (289.7–518.4)                    | 25.8% (22.2 to 29.3%)     | 22.3 (15.8–28.2)                    | -17.1% (-19.8 to -14.5%) | 1.16                                |                          |
| World Bank Upper Middle Income                   |                                                  | 1279.9 (910–1646.1)                    | 39.6% (35.7 to 43.9%)     | 37.9 (26.9–48.7)                    | -29.8% (-32.4 to -27.1%) | 0.85                                |                          |
| World Bank Lower Middle Income                   |                                                  | 1388.4 (983.4–1785.4)                  | 91.5% (88.3 to 95.1%)     | 50.9 (36.3–65.7)                    | -10.5% (-11.9 to -9%)    | 1.09                                |                          |
| World Bank Low Income                            |                                                  | 189.2 (135.7–237.8)                    | 70.3% (65.7 to 75.1%)     | 47.7 (34.4–60.5)                    | -21.7% (-23.8 to -19.7%) | 1.00                                |                          |
| Global                                           |                                                  | 1346.9 (964.2–1782.2)                  | 65.4% (60.7 to 69.6%)     | 16.4 (11.7–21.6)                    | -12.9% (-15.2 to -11.2%) | 1.63                                |                          |
| Subarachnoid haemorrhage                         |                                                  | Southeast Asia, East Asia, and Oceania | 468.1 (330.9–620.1)       | 67.5% (60.3 to 74.5%)               | 17.4 (12.3–23.1)         | -17.3% (-21 to -14.3%)              | 1.31                     |
|                                                  | Central Europe, Eastern Europe, and Central Asia | 145.4 (102.9–191.1)                    | 8.1% (5 to 11.2%)         | 25.7 (18.3–33.8)                    | -10.8% (-13 to -8.4%)    | 1.61                                |                          |
|                                                  | High-income                                      | 422 (302.6–556.4)                      | 74.4% (66.2 to 82.4%)     | 24 (17.2–31.6)                      | 8.7% (4.3 to 11.9%)      | 2.05                                |                          |
|                                                  | Latin America and Caribbean                      | 62.6 (45.1–82.4)                       | 92.3% (85 to 100.2%)      | 10.2 (7.4–13.4)                     | -13.2% (-16.1 to -10.4%) | 2.07                                |                          |
|                                                  | North Africa and Middle East                     | 54.2 (37.9–72.3)                       | 103.1% (83.8 to 116.5%)   | 9.3 (6.6–12.4)                      | -17.9% (-26.2 to -12.2%) | 1.77                                |                          |
|                                                  | South Asia                                       | 151.1 (105.7–203.3)                    | 90.2% (84.1 to 96.6%)     | 8.9 (6.2–12)                        | -9% (-12.3 to -5.7%)     | 1.26                                |                          |
|                                                  | Sub-Saharan Africa                               | 43.6 (31.2–57.5)                       | 118.9% (112.9 to 125.4%)  | 6.9 (5–8.9)                         | -5.6% (-8.1 to -2.9%)    | 1.28                                |                          |
|                                                  | World Bank High Income                           | 451 (322.8–592.9)                      | 70.3% (62.6 to 77.9%)     | 23.6 (16.9–31.1)                    | 5.6% (1.5 to 8.6%)       | 2.06                                |                          |
|                                                  | World Bank Upper Middle Income                   | 523.6 (372.1–692.3)                    | 51.5% (45.5 to 56.8%)     | 15.7 (11.2–20.9)                    | -21.6% (-24.5 to -19.2%) | 1.47                                |                          |

**Table S10** Global and regional burden, mortality, incidence, and prevalence of neurological conditions in different regions of the world

| Measure                                 | Cause                          | Region                                           | All Ages                 |                          | Age-standardised      |                          | Sex ratio<br>2019<br>F:M |
|-----------------------------------------|--------------------------------|--------------------------------------------------|--------------------------|--------------------------|-----------------------|--------------------------|--------------------------|
|                                         |                                |                                                  | Number (thousand)        | Percent change           | Rate per 100 000      | Percent change           |                          |
|                                         |                                |                                                  | 2019                     | From 1990 to 2019        | 2019                  | From 1990 to 2019        |                          |
|                                         |                                | Mean (95% UI)                                    | Mean (95% UI)            | Mean (95% UI)            | Mean (95% UI)         |                          |                          |
| Neurological disorders*                 |                                | World Bank Lower Middle Income                   | 336.5 (238.6–451.6)      | 80.8% (76.6 to 85.2%)    | 11.9 (8.5–15.9)       | -15.4% (-17.6 to -13.1%) | 1.36                     |
|                                         |                                | World Bank Low Income                            | 35.2 (25.2–45.8)         | 101.8% (93.4 to 110%)    | 8.5 (6.1–11)          | -8.6% (-12.3 to -4.9%)   | 1.33                     |
|                                         |                                | Global                                           | 65626 (28649.3–122710)   | 64.9% (58.3 to 81.4%)    | 831.3 (365.8–1542.4)  | 2.9% (-0.7 to 6.8%)      | 1.43                     |
|                                         |                                | Southeast Asia, East Asia, and Oceania           | 17553.3 (7346.6–33447.1) | 64.2% (53.2 to 96.7%)    | 755.8 (321.7–1444.3)  | 10.4% (5.2 to 17.8%)     | 1.41                     |
|                                         |                                | Central Europe, Eastern Europe, and Central Asia | 4202 (2161.2–7257)       | 11.4% (6.6 to 21.3%)     | 882.5 (430–1564.3)    | 0.3% (-3.7 to 4.9%)      | 1.51                     |
|                                         |                                | High-income                                      | 11939 (6080.6–21042.8)   | 35.3% (26.3 to 59.7%)    | 898.5 (377.4–1685)    | 1.4% (-1.7 to 5.4%)      | 1.69                     |
|                                         |                                | Latin America and Caribbean                      | 5390.3 (2370.9–10064.2)  | 63.7% (51.3 to 82.8%)    | 904.1 (405.6–1677.9)  | -1.5% (-9.8 to 5%)       | 1.52                     |
|                                         |                                | North Africa and Middle East                     | 5447.8 (2227.5–10439.2)  | 99.6% (83.8 to 121.6%)   | 935 (419.6–1737.7)    | 0.2% (-6.5 to 8.3%)      | 1.42                     |
|                                         |                                | South Asia                                       | 13815.8 (4897.8–26963.1) | 87.6% (72.8 to 108.7%)   | 778.8 (299.7–1483.9)  | 1.3% (-5.8 to 10.3%)     | 1.33                     |
|                                         |                                | Sub-Saharan Africa                               | 7277.7 (3231.2–13267.4)  | 131.6% (110.5 to 154.4%) | 798.9 (381.9–1413.6)  | 1% (-5.7 to 9.1%)        | 1.29                     |
|                                         |                                | World Bank High Income                           | 13192.1 (6688.8–23330.1) | 36.9% (28 to 60.5%)      | 901.3 (384.4–1675.8)  | 1.5% (-1.6 to 5.9%)      | 1.66                     |
|                                         | World Bank Upper Middle Income | 22834.6 (10450.8–41922.5)                        | 55.6% (46.3 to 77.1%)    | 800.9 (363–1486.8)       | 6.5% (0.5 to 11.7%)   | 1.45                     |                          |
| Alzheimer's disease and other dementias |                                | World Bank Lower Middle Income                   | 25126 (9332.5–49163.9)   | 85.8% (75.5 to 101.1%)   | 821.5 (333.4–1568.3)  | 0.8% (-3.8 to 6.9%)      | 1.36                     |
|                                         |                                | World Bank Low Income                            | 4435.8 (1953.2–8119.1)   | 126.5% (99.6 to 155.7%)  | 747.8 (355.9–1336.9)  | 0.9% (-7.8 to 10.6%)     | 1.32                     |
|                                         |                                | Global                                           | 7417.1 (5226.8–9927.7)   | 164.7% (158.7 to 171%)   | 98.9 (69.5–132.6)     | 5.5% (4 to 6.8%)         | 1.27                     |
|                                         |                                | Southeast Asia, East Asia, and Oceania           | 2316.8 (1631.4–3125)     | 273% (260.1 to 286.1%)   | 107 (75.3–144.2)      | 24.6% (21.7 to 27.4%)    | 1.31                     |
|                                         |                                | Central Europe, Eastern Europe, and Central Asia | 679.3 (473.6–924.6)      | 71% (65.2 to 77.4%)      | 108.2 (75.6–146.6)    | 5.2% (3.4 to 6.9%)       | 1.20                     |
|                                         |                                | High-income                                      | 2698.2 (1904.5–3596.3)   | 121.4% (114.1 to 129%)   | 104 (73.4–138.9)      | 2.8% (1 to 4.7%)         | 1.29                     |
|                                         |                                | Latin America and Caribbean                      | 504 (356.4–674.7)        | 244.3% (234.3 to 255.7%) | 91.9 (64.9–123.1)     | 6.5% (4.8 to 8.2%)       | 1.13                     |
|                                         |                                | North Africa and Middle East                     | 352.2 (248.1–474.3)      | 187.7% (180 to 195.6%)   | 112.8 (79.1–151.9)    | 2.8% (0.9 to 4.6%)       | 1.10                     |
|                                         |                                | South Asia                                       | 628.3 (444.1–839.5)      | 228.2% (216.5 to 241.4%) | 59.9 (42.4–79.9)      | 1.6% (-0.1 to 3.3%)      | 1.04                     |
|                                         |                                | Sub-Saharan Africa                               | 238.3 (167.8–321.2)      | 126.8% (122 to 132%)     | 79.6 (56.1–106.3)     | 1.4% (-0.1 to 2.8%)      | 1.38                     |
|                                         |                                | World Bank High Income                           | 2870.9 (2024.6–3822.1)   | 121.6% (114.2 to 129%)   | 104.4 (73.7–139.3)    | 2.8% (1.1 to 4.7%)       | 1.30                     |
|                                         | World Bank Upper Middle Income | 3131.1 (2195.7–4219)                             | 229.2% (220.3 to 238.5%) | 107.9 (75.7–145.5)       | 16.3% (14.2 to 18.4%) | 1.24                     |                          |
|                                         | World Bank Lower Middle Income | 1238.5 (877.3–1658.3)                            | 157.4% (152.6 to 162.9%) | 72.3 (51–96.6)           | -5.1% (-6.6 to -3.6%) | 1.16                     |                          |
|                                         | World Bank Low Income          | 173.1 (121.7–234.2)                              | 138.1% (131.1 to 145.6%) | 83.9 (59.1–112.4)        | 1.5% (-0.2 to 3.2%)   | 1.35                     |                          |
| Parkinson's disease                     |                                | Global                                           | 1210.1 (841.2–1640.7)    | 154.7% (149.4 to 160.9%) | 15.1 (10.4–20.3)      | 16.2% (13.5 to 19%)      | 0.67                     |
|                                         |                                | Southeast Asia, East Asia, and Oceania           | 502.1 (341–694.5)        | 238.9% (227.1 to 250.6%) | 19.3 (13.3–26.7)      | 30.8% (26.3 to 35.4%)    | 0.66                     |
|                                         |                                | Central Europe, Eastern Europe, and Central Asia | 79.7 (55.1–108)          | 42.6% (37.5 to 48.7%)    | 12.5 (8.6–16.9)       | 2.3% (-1.4 to 6.3%)      | 0.66                     |
|                                         |                                | High-income                                      | 344.2 (246.2–459.2)      | 93.9% (82.4 to 105.6%)   | 15.3 (10.9–20.4)      | 6.7% (0.7 to 12.4%)      | 0.65                     |
|                                         |                                | Latin America and Caribbean                      | 73.1 (50.6–99.1)         | 236% (224 to 248.3%)     | 12.8 (8.9–17.4)       | 20.2% (16.4 to 24.2%)    | 0.63                     |
|                                         |                                | North Africa and Middle East                     | 44.5 (30.7–60.5)         | 197.3% (182.1 to 214.4%) | 11.7 (8–15.7)         | 14.8% (9.2 to 21.2%)     | 0.73                     |
|                                         |                                | South Asia                                       | 130.9 (88.8–181.1)       | 213% (199.7 to 227.7%)   | 10.1 (6.9–13.8)       | 16.8% (13.2 to 20.7%)    | 0.75                     |

**Table S10** Global and regional burden, mortality, incidence, and prevalence of neurological conditions in different regions of the world

| Measure             | Cause                          | Region                                           | All Ages                 |                          | Age-standardised      |                        | Sex ratio<br>2019<br>F:M |
|---------------------|--------------------------------|--------------------------------------------------|--------------------------|--------------------------|-----------------------|------------------------|--------------------------|
|                     |                                |                                                  | Number (thousand)        | Percent change           | Rate per 100 000      | Percent change         |                          |
|                     |                                |                                                  | 2019                     | From 1990 to 2019        | 2019                  | From 1990 to 2019      |                          |
|                     |                                | Mean (95% UI)                                    | Mean (95% UI)            | Mean (95% UI)            | Mean (95% UI)         |                        |                          |
| Idiopathic epilepsy |                                | Sub-Saharan Africa                               | 35.6 (24.5–48.5)         | 137.6% (130.9 to 145.1%) | 9.1 (6.2–12.2)        | 10.1% (7.5 to 12.8%)   | 0.69                     |
|                     |                                | World Bank High Income                           | 370 (264.4–493.4)        | 95.2% (83.4 to 106.7%)   | 15.4 (11–20.5)        | 7.2% (1.1 to 13.2%)    | 0.66                     |
|                     |                                | World Bank Upper Middle Income                   | 577.9 (392.9–797.8)      | 212.5% (202.8 to 222.3%) | 17.5 (12–24.2)        | 29.7% (25.7 to 33.8%)  | 0.65                     |
|                     |                                | World Bank Lower Middle Income                   | 235.9 (160.9–322.2)      | 165.3% (158.1 to 172.9%) | 11 (7.6–14.9)         | 9.9% (7.4 to 12.5%)    | 0.74                     |
|                     |                                | World Bank Low Income                            | 25.6 (17.6–35.3)         | 124.4% (113.6 to 136.3%) | 9.4 (6.5–12.7)        | 3.9% (-0.5 to 9.1%)    | 0.72                     |
|                     |                                | Global                                           | 7740.8 (4810.3–11216.7)  | 43.7% (18.7 to 76.3%)    | 101.1 (63.1–146.8)    | 1.4% (-15.4 to 23.2%)  | 0.91                     |
|                     |                                | Southeast Asia, East Asia, and Oceania           | 1499 (892.6–2234.9)      | 32.5% (-3.4 to 85.7%)    | 72.6 (43.3–106.4)     | 9.7% (-19.5 to 53%)    | 0.92                     |
|                     |                                | Central Europe, Eastern Europe, and Central Asia | 415 (234.7–633.6)        | -4.9% (-26.9 to 20.6%)   | 99.2 (57–154.3)       | -5.2% (-28.4 to 20.9%) | 0.87                     |
|                     |                                | High-income                                      | 883.3 (484.8–1481.1)     | 17.8% (-10.1 to 49.4%)   | 78.1 (41.8–131.1)     | -5.1% (-26.5 to 19.4%) | 0.95                     |
|                     |                                | Latin America and Caribbean                      | 858 (514.5–1295.1)       | 19.2% (-9.5 to 60.1%)    | 147 (88–222.7)        | -20.8% (-39.7 to 5.1%) | 0.97                     |
|                     |                                | North Africa and Middle East                     | 603.1 (342.3–938.7)      | 47.5% (-1 to 119%)       | 101 (57.3–156.5)      | -9.3% (-39.8 to 33.8%) | 0.87                     |
|                     |                                | South Asia                                       | 1827 (1118.8–2751.1)     | 59.1% (12.2 to 142%)     | 102.3 (62.6–153.1)    | -2.5% (-30.5 to 49.3%) | 0.89                     |
|                     |                                | Sub-Saharan Africa                               | 1655.3 (970.1–2541.9)    | 108.6% (63.5 to 180.3%)  | 154 (91.2–232)        | -5.4% (-25.5 to 26.2%) | 0.86                     |
|                     |                                | World Bank High Income                           | 1040.7 (574.3–1729.4)    | 20.9% (-6.3 to 49.6%)    | 83.7 (45.4–138.6)     | -2.8% (-24.2 to 20.8%) | 0.93                     |
|                     |                                | World Bank Upper Middle Income                   | 2311 (1394.8–3430.9)     | 16.9% (-10.4 to 54%)     | 90.1 (54–134.7)       | -3.9% (-26.6 to 25%)   | 0.93                     |
|                     | World Bank Lower Middle Income | 3419.4 (2089.2–5050.1)                           | 65.3% (27.5 to 124.4%)   | 108.2 (66.9–159.4)       | 1.6% (-22.2 to 38.1%) | 0.89                   |                          |
|                     | World Bank Low Income          | 964.8 (524.8–1539.1)                             | 101.9% (47.3 to 202.1%)  | 133.7 (74–209.7)         | -6.6% (-32 to 37.4%)  | 0.88                   |                          |
| Multiple sclerosis  |                                | Global                                           | 451.2 (320.7–591.5)      | 71.3% (65.3 to 77.1%)    | 5.5 (3.9–7.1)         | -5.8% (-8.6 to -2.9%)  | 1.93                     |
|                     |                                | Southeast Asia, East Asia, and Oceania           | 18.2 (12–25.8)           | 100.1% (86.8 to 112.7%)  | 0.7 (0.5–1)           | 19.9% (18 to 22%)      | 1.45                     |
|                     |                                | Central Europe, Eastern Europe, and Central Asia | 38.6 (27–50.9)           | 8.5% (4.5 to 12.8%)      | 7.5 (5.3–9.9)         | -4.5% (-7.9 to -1.1%)  | 1.31                     |
|                     |                                | High-income                                      | 264.3 (189.2–338)        | 57.4% (48.7 to 66.1%)    | 18.8 (13.5–24.1)      | 17.3% (11.2 to 23.7%)  | 2.15                     |
|                     |                                | Latin America and Caribbean                      | 21.2 (14.4–29.1)         | 158% (146.8 to 170.2%)   | 3.4 (2.3–4.7)         | 19.9% (15.6 to 24.4%)  | 1.91                     |
|                     |                                | North Africa and Middle East                     | 57.7 (40.8–76.8)         | 169.3% (156.5 to 183.1%) | 10 (7.1–13.3)         | 10.9% (6.1 to 16.3%)   | 1.88                     |
|                     |                                | South Asia                                       | 38.4 (25.5–54)           | 135.2% (129.9 to 140.7%) | 2.2 (1.5–3.1)         | 14.3% (12.9 to 15.9%)  | 1.76                     |
|                     |                                | Sub-Saharan Africa                               | 12.8 (8.5–18.3)          | 157.3% (151.9 to 163.8%) | 1.7 (1.2–2.4)         | 10.7% (8.4 to 13.6%)   | 2.18                     |
|                     |                                | World Bank High Income                           | 278 (198.7–356.2)        | 57.6% (49.2 to 65.9%)    | 17.7 (12.7–22.7)      | 14.8% (9.1 to 20.7%)   | 2.16                     |
|                     |                                | World Bank Upper Middle Income                   | 90 (62.6–119.3)          | 84.4% (77.7 to 91.8%)    | 2.8 (1.9–3.7)         | 6.2% (3.1 to 9.5%)     | 1.64                     |
|                     |                                | World Bank Lower Middle Income                   | 73.2 (49.3–101.7)        | 112.8% (105.9 to 119.3%) | 2.5 (1.7–3.4)         | 3.2% (0 to 6.1%)       | 1.71                     |
|                     |                                | World Bank Low Income                            | 9.7 (6.4–13.7)           | 159.7% (148.4 to 172.6%) | 2 (1.3–2.7)           | 13.6% (8.8 to 18.9%)   | 1.94                     |
|                     |                                | Global                                           | 42077.7 (6418.4–95645.2) | 56.6% (52.6 to 62.1%)    | 525.5 (78.8–1194)     | 1.5% (-4.4 to 3.3%)    | 1.70                     |
|                     |                                | Southeast Asia, East Asia, and Oceania           | 11650.2 (1650.6–27010.1) | 49.5% (41.1 to 59.8%)    | 488.1 (64.8–1135)     | 6.7% (-3 to 10.5%)     | 1.65                     |
|                     |                                | Central Europe, Eastern Europe, and Central Asia | 2468.6 (656.6–5214.9)    | 4.1% (1.7 to 9.5%)       | 541.2 (131.6–1161.6)  | -0.5% (-2.7 to 0.3%)   | 1.86                     |
|                     | High-income                    | 6617.2 (1167.8–14754.8)                          | 17.2% (13.8 to 28%)      | 587.6 (89.5–1321.7)      | 0.6% (-1 to 2.2%)     | 2.06                   |                          |

**Table S10** Global and regional burden, mortality, incidence, and prevalence of neurological conditions in different regions of the world

| Measure               | Cause                          | Region                                           | All Ages                  |                                     | Age-standardised         |                                     | Sex ratio<br>2019<br>F:M |
|-----------------------|--------------------------------|--------------------------------------------------|---------------------------|-------------------------------------|--------------------------|-------------------------------------|--------------------------|
|                       |                                |                                                  | Number (thousand)<br>2019 | Percent change<br>From 1990 to 2019 | Rate per 100 000<br>2019 | Percent change<br>From 1990 to 2019 |                          |
|                       |                                |                                                  | Mean (95% UI)             | Mean (95% UI)                       | Mean (95% UI)            | Mean (95% UI)                       |                          |
| Tension-type headache |                                | Latin America and Caribbean                      | 3388.3 (455.7–7790.2)     | 63.7% (56.7 to 91.3%)               | 557.2 (74.1–1281.5)      | 2.2% (-0.1 to 4.2%)                 | 1.94                     |
|                       |                                | North Africa and Middle East                     | 3793.2 (645.3–8665.8)     | 102.1% (93.2 to 125.1%)             | 601.4 (107–1371.8)       | 0% (-1.6 to 1.6%)                   | 1.70                     |
|                       |                                | South Asia                                       | 9779.9 (1150.3–22319.5)   | 86.3% (79.3 to 99.4%)               | 526.3 (66.1–1196.4)      | 0.6% (-2.2 to 3.6%)                 | 1.54                     |
|                       |                                | Sub-Saharan Africa                               | 4380.3 (668.4–9895.8)     | 135.7% (132.2 to 138.9%)            | 461 (81.5–1033.8)        | 1.2% (-0.2 to 2.3%)                 | 1.54                     |
|                       |                                | World Bank High Income                           | 7368.2 (1321.7–16430.4)   | 19.6% (16 to 30.6%)                 | 584.6 (90.8–1312.1)      | 0.5% (-1.4 to 2.2%)                 | 2.02                     |
|                       |                                | World Bank Upper Middle Income                   | 14488 (2455.8–32795.2)    | 44.8% (37.8 to 53%)                 | 503.1 (78.6–1148.7)      | 5.7% (-5.5 to 9.7%)                 | 1.75                     |
|                       |                                | World Bank Lower Middle Income                   | 17514.6 (2229.5–40394.2)  | 84.1% (78.8 to 93.5%)               | 544 (74.1–1244.9)        | 0.1% (-2.3 to 1.8%)                 | 1.57                     |
|                       |                                | World Bank Low Income                            | 2682.5 (416.6–6084.3)     | 130.4% (126.5 to 133.4%)            | 432.4 (77.5–968.1)       | 1.4% (0 to 2.4%)                    | 1.58                     |
|                       |                                | Global                                           | 4541.7 (1395.5–14981.3)   | 57.8% (45.1 to 65.9%)               | 56.2 (17–188.5)          | -2.5% (-5.4 to 1.1%)                | 1.25                     |
|                       |                                | Southeast Asia, East Asia, and Oceania           | 1126.6 (354.3–3731.9)     | 52.5% (26.4 to 74.1%)               | 46 (13.8–161.6)          | 1.7% (-5.8 to 14.3%)                | 1.10                     |
|                       |                                | Central Europe, Eastern Europe, and Central Asia | 411.7 (145.4–1182.2)      | 6.7% (-0.7 to 12.1%)                | 85.9 (28.8–257.4)        | -1.4% (-4 to 1.5%)                  | 1.43                     |
|                       |                                | High-income                                      | 846.4 (251.2–2751)        | 23.9% (12.5 to 31.8%)               | 68.7 (19.2–230.1)        | 0% (-4.6 to 2.6%)                   | 1.36                     |
|                       |                                | Latin America and Caribbean                      | 331.7 (95.8–1195.2)       | 76.7% (50.4 to 99.5%)               | 54.3 (15.6–196.1)        | 0.3% (-4.4 to 4.2%)                 | 1.33                     |
|                       |                                | North Africa and Middle East                     | 416.6 (138.3–1196.8)      | 115.5% (84.9 to 132.3%)             | 68.1 (22.8–195.5)        | 1% (-9.5 to 8.7%)                   | 1.28                     |
|                       |                                | South Asia                                       | 930.2 (251.8–3573.8)      | 92.1% (70.8 to 107.2%)              | 51.7 (14.3–193.5)        | 0.5% (-6.1 to 7.5%)                 | 1.21                     |
|                       |                                | Sub-Saharan Africa                               | 478.5 (142.5–1776.1)      | 133.2% (122.4 to 143.2%)            | 55 (17.7–184.3)          | 0.2% (-4.5 to 4.7%)                 | 1.27                     |
|                       |                                | World Bank High Income                           | 942.1 (286.1–3013.9)      | 25.8% (13.1 to 34.1%)               | 68.5 (19.6–226.6)        | -0.5% (-5.8 to 2%)                  | 1.36                     |
|                       |                                | World Bank Upper Middle Income                   | 1594.4 (533.9–4790.4)     | 46.5% (25.3 to 59.9%)               | 53.3 (16.9–170)          | -1.4% (-7.6 to 7.4%)                | 1.21                     |
|                       |                                | World Bank Lower Middle Income                   | 1706.7 (486.1–6242.3)     | 87.7% (70.5 to 98.5%)               | 54.9 (15.9–191.2)        | -1.1% (-5.7 to 4.1%)                | 1.23                     |
|                       |                                | World Bank Low Income                            | 296.1 (87.9–1098.6)       | 127.2% (116.2 to 137.7%)            | 51.6 (16.5–173.5)        | 0.4% (-4.5 to 5%)                   | 1.27                     |
| Motor neuron disease  |                                | Global                                           | 57.1 (40–76.3)            | 68.8% (62.4 to 75.6%)               | 0.7 (0.5–1)              | 1.9% (0.6 to 3.3%)                  | 0.82                     |
|                       |                                | Southeast Asia, East Asia, and Oceania           | 11.7 (8–16.4)             | 47% (36.3 to 59.8%)                 | 0.5 (0.4–0.7)            | 9.6% (7.8 to 11.7%)                 | 0.93                     |
|                       |                                | Central Europe, Eastern Europe, and Central Asia | 3.1 (2.2–4.3)             | 6.7% (2.5 to 11.4%)                 | 0.7 (0.5–1)              | 4% (2.4 to 5.7%)                    | 0.99                     |
|                       |                                | High-income                                      | 25.7 (17.9–33.9)          | 77.3% (70.4 to 84.5%)               | 1.6 (1.1–2.1)            | 19.3% (15.7 to 23.9%)               | 0.76                     |
|                       |                                | Latin America and Caribbean                      | 3.2 (2.3–4.4)             | 77% (65.6 to 90.1%)                 | 0.5 (0.4–0.7)            | 11.3% (8.7 to 14.2%)                | 0.95                     |
|                       |                                | North Africa and Middle East                     | 3.3 (2.3–4.6)             | 103.3% (92.1 to 113.8%)             | 0.5 (0.4–0.8)            | 3.6% (2 to 5.1%)                    | 0.86                     |
|                       |                                | South Asia                                       | 6.9 (4.7–9.7)             | 92% (86 to 98.6%)                   | 0.4 (0.3–0.5)            | 10.3% (8.7 to 12.1%)                | 0.87                     |
|                       |                                | Sub-Saharan Africa                               | 3 (2–4.2)                 | 129.7% (126.5 to 132.6%)            | 0.3 (0.2–0.4)            | 2.5% (1.8 to 3.1%)                  | 0.89                     |
|                       |                                | World Bank High Income                           | 26.6 (18.6–35)            | 75.3% (68.4 to 82.3%)               | 1.6 (1.1–2)              | 17.6% (14.3 to 21.9%)               | 0.77                     |
|                       |                                | World Bank Upper Middle Income                   | 16.4 (11.3–22.9)          | 46.9% (37.1 to 58%)                 | 0.6 (0.4–0.8)            | 10.1% (8.5 to 11.9%)                | 0.93                     |
|                       | World Bank Lower Middle Income | 11.9 (8.1–16.7)                                  | 84.2% (78.2 to 90.5%)     | 0.4 (0.3–0.5)                       | 5.4% (4.6 to 6.3%)       | 0.89                                |                          |
|                       | World Bank Low Income          | 2 (1.4–2.8)                                      | 119.9% (115.7 to 124%)    | 0.3 (0.2–0.5)                       | 1.2% (0.1 to 2.4%)       | 0.89                                |                          |
| Other                 |                                | Global                                           | 2130.4 (1392.1–3016.4)    | 93.3% (65.4 to 128.5%)              | 28.3 (18.4–40.4)         | 40.6% (20.9 to 64.7%)               | 0.94                     |

**Table S10** Global and regional burden, mortality, incidence, and prevalence of neurological conditions in different regions of the world

| Measure                          |                                                  | All Ages                  |                          | Age-standardised      |                          | Sex ratio |
|----------------------------------|--------------------------------------------------|---------------------------|--------------------------|-----------------------|--------------------------|-----------|
|                                  |                                                  | Number (thousand)         | Percent change           | Rate per 100 000      | Percent change           |           |
| Cause                            | Region                                           | 2019                      | From 1990 to 2019        | 2019                  | From 1990 to 2019        | 2019      |
|                                  |                                                  | Mean (95% UI)             | Mean (95% UI)            | Mean (95% UI)         | Mean (95% UI)            | F:M       |
| neurological disorders           | Southeast Asia, East Asia, and Oceania           | 428·6 (278·7–604·8)       | 80% (40·7 to 135·4%)     | 21·5 (13·5–31·2)      | 51·9% (19·4 to 96·5%)    | 0·96      |
|                                  | Central Europe, Eastern Europe, and Central Asia | 106 (67·5–154·4)          | 24% (2·1 to 51·4%)       | 27·2 (16·6–41·1)      | 31% (3·6 to 63·2%)       | 0·94      |
|                                  | High-income                                      | 259·8 (170·4–379·6)       | 56·9% (35 to 81·2%)      | 24·4 (15·1–37·3)      | 32·6% (10·7 to 57·2%)    | 1·04      |
|                                  | Latin America and Caribbean                      | 210·7 (131·4–311)         | 54·8% (21 to 100·9%)     | 36·8 (23–54·7)        | 12·4% (-12·2 to 44·6%)   | 0·97      |
|                                  | North Africa and Middle East                     | 177·2 (106·1–265·1)       | 98·6% (41·9 to 177·9%)   | 29·4 (18–43·9)        | 25·5% (-8·9 to 71%)      | 0·92      |
|                                  | South Asia                                       | 474·4 (288·6–707)         | 106·9% (51·2 to 203·4%)  | 25·8 (15·9–38·1)      | 33·4% (-1·7 to 88·8%)    | 0·90      |
|                                  | Sub-Saharan Africa                               | 473·7 (281·7–730·9)       | 198·7% (135·8 to 295·5%) | 38·2 (23·3–57·9)      | 32·9% (6·3 to 72·7%)     | 0·90      |
|                                  | World Bank High Income                           | 295·6 (192·6–429·3)       | 58·5% (36·9 to 81·9%)    | 25·4 (15·6–38·9)      | 34·3% (12·6 to 58·7%)    | 1·02      |
|                                  | World Bank Upper Middle Income                   | 625·8 (401·8–893·3)       | 56·5% (26·9 to 94·4%)    | 25·7 (16–37·5)        | 35·6% (8·3 to 67·3%)     | 0·96      |
|                                  | World Bank Lower Middle Income                   | 925·8 (574·2–1361·7)      | 121·5% (74·1 to 192·6%)  | 28·3 (17·8–41·2)      | 39·9% (10·7 to 78·9%)    | 0·91      |
| World Bank Low Income            | 281·9 (156·1–448·1)                              | 189·7% (113·1 to 324·2%)  | 34·5 (19·8–53·6)         | 32·2% (-0·9 to 88·2%) | 0·92                     |           |
| Headache disorders               | Global                                           | 46619·4 (9772·9–100161·7) | 56·7% (52·4 to 62·1%)    | 581·8 (119·6–1255·6)  | 1·1% (-4·2 to 2·9%)      | 1·65      |
|                                  | Southeast Asia, East Asia, and Oceania           | 12776·9 (2520·4–28023·2)  | 49·8% (40·9 to 60%)      | 534·1 (98·6–1189·2)   | 6·3% (-2·7 to 10·1%)     | 1·59      |
|                                  | Central Europe, Eastern Europe, and Central Asia | 2880·3 (987·5–5766·8)     | 4·5% (2 to 9·3%)         | 627·1 (196–1287·8)    | -0·6% (-2·6 to 0·3%)     | 1·79      |
|                                  | High-income                                      | 7463·5 (1712·2–15883)     | 18% (14·5 to 27·9%)      | 656·3 (135·9–1424·6)  | 0·5% (-1·3 to 2%)        | 1·97      |
|                                  | Latin America and Caribbean                      | 3720 (683–8205·9)         | 64·8% (57·2 to 90·5%)    | 611·5 (111·4–1348·8)  | 2·1% (-0·4 to 4·1%)      | 1·88      |
|                                  | North Africa and Middle East                     | 4209·8 (990·1–9068·3)     | 103·3% (94·5 to 123·7%)  | 669·6 (159·1–1431·3)  | 0·1% (-2·4 to 2·4%)      | 1·65      |
|                                  | South Asia                                       | 10710 (1765·8–23536·8)    | 86·8% (79·5 to 99·8%)    | 578 (100·5–1258·7)    | 0·6% (-2·4 to 3·7%)      | 1·51      |
|                                  | Sub-Saharan Africa                               | 4858·8 (1002·7–10481·4)   | 135·4% (130·5 to 138·7%) | 516·1 (123·2–1089·1)  | 1·1% (-0·8 to 2·4%)      | 1·51      |
|                                  | World Bank High Income                           | 8310·2 (1933–17641·9)     | 20·2% (16·7 to 30·3%)    | 653·1 (138·2–1410·8)  | 0·4% (-1·6 to 2%)        | 1·94      |
|                                  | World Bank Upper Middle Income                   | 16082·4 (3701·8–34346)    | 44·9% (37·6 to 52·8%)    | 556·4 (118·8–1199·2)  | 4·9% (-5·3 to 9·1%)      | 1·69      |
| World Bank Lower Middle Income   | 19221·3 (3425–41915·3)                           | 84·4% (78·7 to 93·6%)     | 598·8 (112·2–1302·8)     | 0% (-2·5 to 1·7%)     | 1·54                     |           |
| World Bank Low Income            | 2978·5 (625·3–6424)                              | 130·1% (125 to 133·4%)    | 484·1 (115·9–1022·8)     | 1·3% (-0·8 to 2·6%)   | 1·54                     |           |
| <b>YLLs (Years of Life Lost)</b> |                                                  |                           |                          |                       |                          |           |
| Meningitis                       | Global                                           | 15649·9 (13103–18930·7)   | -52·1% (-60·4 to -42·7%) | 225 (187·3–273·1)     | -57·7% (-65 to -48·8%)   | 0·85      |
|                                  | Southeast Asia, East Asia, and Oceania           | 1055 (918·3–1208·2)       | -82·5% (-85·7 to -78·7%) | 66·5 (57·3–76·8)      | -80·2% (-84 to -75·9%)   | 0·70      |
|                                  | Central Europe, Eastern Europe, and Central Asia | 126·8 (113·6–141·3)       | -77·1% (-79·6 to -74%)   | 34·5 (30·5–39·1)      | -77·4% (-80·2 to -74·1%) | 0·64      |
|                                  | High-income                                      | 129·4 (122·1–136)         | -66·8% (-68·7 to -64·9%) | 13·7 (12·7–14·7)      | -74% (-76 to -72%)       | 0·78      |
|                                  | Latin America and Caribbean                      | 332·2 (271·7–397·2)       | -76·3% (-81·3 to -70·8%) | 63·5 (51·6–76·7)      | -78·4% (-83 to -73·2%)   | 0·71      |
|                                  | North Africa and Middle East                     | 376·5 (310·2–457·5)       | -72·5% (-79·3 to -64·6%) | 64·1 (53–77·6)        | -77·2% (-82·4 to -70·9%) | 0·89      |
|                                  | South Asia                                       | 3457·6 (2935·3–4130)      | -64·2% (-71·6 to -55·7%) | 204 (172·5–244·6)     | -69·9% (-76 to -63·2%)   | 1·00      |
|                                  | Sub-Saharan Africa                               | 10172·3 (8053·5–12712·2)  | -23·6% (-38·7 to -2·8%)  | 757·7 (617·6–922·1)   | -56·9% (-64·6 to -46·4%) | 0·80      |
|                                  | World Bank High Income                           | 135·8 (127·8–143·1)       | -68·4% (-70·4 to -66·6%) | 12·6 (11·7–13·6)      | -75·6% (-77·6 to -73·7%) | 0·77      |
|                                  | World Bank Upper Middle Income                   | 866·2 (777·8–962·7)       | -83% (-85·7 to -80%)     | 39·4 (35·1–44·3)      | -83·2% (-86 to -80·1%)   | 0·72      |

**Table S10** Global and regional burden, mortality, incidence, and prevalence of neurological conditions in different regions of the world

| Measure                                 | Region                                           | All Ages                                   |                                                      | Age-standardised                          |                                                      | Sex ratio<br>2019<br>F:M |
|-----------------------------------------|--------------------------------------------------|--------------------------------------------|------------------------------------------------------|-------------------------------------------|------------------------------------------------------|--------------------------|
|                                         |                                                  | Number (thousand)<br>2019<br>Mean (95% UI) | Percent change<br>From 1990 to 2019<br>Mean (95% UI) | Rate per 100 000<br>2019<br>Mean (95% UI) | Percent change<br>From 1990 to 2019<br>Mean (95% UI) |                          |
| Encephalitis                            | World Bank Lower Middle Income                   | 8968.6 (7480.9–10810.6)                    | -51.1% (-59.6 to -39.8%)                             | 284.5 (237.8–343)                         | -60.4% (-67.2 to -51.9%)                             | 0.89                     |
|                                         | World Bank Low Income                            | 5669.5 (4508.8–7103.1)                     | -35.8% (-48.8 to -19.1%)                             | 645.2 (530.5–782.8)                       | -61.9% (-68.8 to -53.2%)                             | 0.78                     |
|                                         | Global                                           | 4315 (3623.2–5928.3)                       | -46.2% (-58.5 to -17.4%)                             | 59.2 (49.5–80.9)                          | -55.9% (-65.7 to -33.2%)                             | 0.86                     |
|                                         | Southeast Asia, East Asia, and Oceania           | 624.9 (488.6–726.6)                        | -54.8% (-66.1 to -27.9%)                             | 38 (28.2–45)                              | -51.2% (-63.1 to -27.8%)                             | 0.74                     |
|                                         | Central Europe, Eastern Europe, and Central Asia | 188.1 (161.2–221.7)                        | -28.5% (-37.5 to -8.1%)                              | 52.9 (44.7–62.9)                          | -23.3% (-34.3 to 0.2%)                               | 0.78                     |
|                                         | High-income                                      | 95.2 (79.7–102)                            | 26.7% (5.8 to 38.1%)                                 | 8.8 (7.4–9.6)                             | -0.6% (-15.1 to 9.4%)                                | 0.83                     |
|                                         | Latin America and Caribbean                      | 168.3 (136.9–206.6)                        | -19.5% (-35.5 to 3.2%)                               | 31.5 (25.5–38.8)                          | -29.7% (-43.9 to -10.8%)                             | 0.80                     |
|                                         | North Africa and Middle East                     | 231.3 (179.8–314.1)                        | 9.8% (-25.4 to 58.2%)                                | 38.8 (30.3–52.5)                          | -21.8% (-45.9 to 9.5%)                               | 1.07                     |
|                                         | South Asia                                       | 2695.6 (2135.3–4145.7)                     | -52.7% (-66 to -22.5%)                               | 161.4 (128.7–246.4)                       | -62.4% (-71.9 to -39.3%)                             | 0.95                     |
|                                         | Sub-Saharan Africa                               | 311.6 (239–429.6)                          | 71.8% (23.1 to 124.4%)                               | 26.6 (21.2–35.3)                          | -7.8% (-30.1 to 14.1%)                               | 0.68                     |
|                                         | World Bank High Income                           | 112 (98.1–122)                             | 4.2% (-6.7 to 13%)                                   | 9.6 (8.5–10.8)                            | -20% (-27.8 to -12.7%)                               | 0.83                     |
| World Bank Upper Middle Income          | 548 (473.7–664.8)                                | -54.9% (-64.1 to -29.2%)                   | 25.6 (21.9–31.6)                                     | -54.3% (-63.9 to -28.2%)                  | 0.81                                                 |                          |
| Tetanus                                 | World Bank Lower Middle Income                   | 3360 (2747.2–4819.3)                       | -47.8% (-61 to -17.6%)                               | 111.5 (91.5–159.6)                        | -59.2% (-68.9 to -38.4%)                             | 0.88                     |
|                                         | World Bank Low Income                            | 293.2 (237.6–373.7)                        | 15.5% (-21.6 to 103.2%)                              | 40 (32.8–48.5)                            | -32.8% (-51.4 to 7.1%)                               | 0.84                     |
|                                         | Global                                           | 2314.6 (1768.8–3277)                       | -89.4% (-92.1 to -83.8%)                             | 33.7 (25.6–47.8)                          | -90.3% (-92.7 to -85.1%)                             | 0.86                     |
|                                         | Southeast Asia, East Asia, and Oceania           | 222.1 (134.6–275.3)                        | -93.9% (-96.6 to -91.2%)                             | 11.6 (7.6–14.4)                           | -94.5% (-96.5 to -92.1%)                             | 0.64                     |
|                                         | Central Europe, Eastern Europe, and Central Asia | 0.9 (0.6–1.9)                              | -84.3% (-88 to -68.6%)                               | 0.2 (0.1–0.4)                             | -84.8% (-88.2 to -70.2%)                             | 0.63                     |
|                                         | High-income                                      | 1.4 (1.1–3)                                | -83.8% (-87.1 to -66.5%)                             | 0.1 (0.1–0.2)                             | -88.9% (-91.2 to -77.3%)                             | 0.67                     |
|                                         | Latin America and Caribbean                      | 23.4 (14.7–44.1)                           | -89.7% (-93.9 to -80.4%)                             | 4.5 (2.7–8.7)                             | -91.5% (-94.9 to -83.5%)                             | 1.07                     |
|                                         | North Africa and Middle East                     | 87.4 (53.6–139.5)                          | -85.8% (-92.9 to -68.7%)                             | 15 (9.2–24.1)                             | -88.2% (-93.9 to -76.1%)                             | 0.85                     |
|                                         | South Asia                                       | 827.8 (566–1156.9)                         | -94.2% (-96 to -91.2%)                               | 50.6 (34.6–71)                            | -94.3% (-96.2 to -91.5%)                             | 1.00                     |
|                                         | Sub-Saharan Africa                               | 1151.6 (809.3–1864.4)                      | -62.8% (-76.5 to -33.7%)                             | 84.4 (57.6–133.2)                         | -78.9% (-85.9 to -67.7%)                             | 0.75                     |
|                                         | World Bank High Income                           | 3.2 (2–5.2)                                | -85.9% (-95.3 to -69.1%)                             | 0.2 (0.2–0.4)                             | -91.3% (-97.3 to -79.1%)                             | 0.60                     |
| World Bank Upper Middle Income          | 39.9 (29.9–62.4)                                 | -97.7% (-98.3 to -96.1%)                   | 1.6 (1.3–2.4)                                        | -98% (-98.5 to -96.7%)                    | 0.50                                                 |                          |
| Brain and central nervous system cancer | World Bank Lower Middle Income                   | 1512.8 (1109.6–2026.8)                     | -91.1% (-93.8 to -87.3%)                             | 49 (35.9–65.4)                            | -92.2% (-94.5 to -89.2%)                             | 0.85                     |
|                                         | World Bank Low Income                            | 757.4 (508.5–1317.6)                       | -74.5% (-83.9 to -46.8%)                             | 82.3 (53.6–138.9)                         | -84.4% (-89.6 to -71.7%)                             | 0.77                     |
|                                         | Global                                           | 8530.5 (6625.1–9447.6)                     | 39.7% (-13.7 to 66%)                                 | 107.4 (83.1–119)                          | -10.8% (-43.7 to 4.8%)                               | 0.71                     |
|                                         | Southeast Asia, East Asia, and Oceania           | 2629.6 (1975.7–3089.8)                     | 21.9% (-21.3 to 64.2%)                               | 110.5 (83.3–129.4)                        | -19.1% (-47.6 to 7.4%)                               | 0.76                     |
|                                         | Central Europe, Eastern Europe, and Central Asia | 815 (604.1–926.1)                          | 18.4% (-21.2 to 36.2%)                               | 166.9 (125.5–190.2)                       | 5.7% (-29.9 to 21.5%)                                | 0.65                     |
|                                         | High-income                                      | 1694.8 (1218–1829.5)                       | 29.8% (-17 to 40.7%)                                 | 119.6 (88.4–128.4)                        | -9.2% (-41.3 to -2.1%)                               | 0.66                     |
|                                         | Latin America and Caribbean                      | 704.1 (476.3–823.2)                        | 110% (3 to 174.9%)                                   | 120 (80.9–140.8)                          | 28.4% (-36.9 to 67.7%)                               | 0.76                     |
|                                         | North Africa and Middle East                     | 705.6 (486–836.9)                          | 69.9% (0.4 to 130.4%)                                | 126.4 (86.6–149.3)                        | -5.6% (-40.2 to 22.6%)                               | 0.86                     |
|                                         | South Asia                                       | 1371.9 (1074.7–1650.1)                     | 47.5% (-13.9 to 119.2%)                              | 80.4 (63–97)                              | -1.3% (-38.3 to 34.8%)                               | 0.67                     |
|                                         | Sub-Saharan Africa                               | 609.5 (446.6–776.8)                        | 122.6% (19.2 to 259.5%)                              | 61.8 (43.3–75.8)                          | 13.9% (-34.7 to 64.8%)                               | 0.68                     |
|                                         | World Bank High Income                           | 1874.2 (1354.3–2033.1)                     | 28.4% (-18.7 to 40%)                                 | 120.3 (89.3–129.9)                        | -11.1% (-43.3 to -3.4%)                              | 0.66                     |
| World Bank Upper Middle Income          | 3664.6 (2736.9–4153.2)                           | 29.9% (-19.7 to 56.2%)                     | 125 (93–140.9)                                       | -12.6% (-46.1 to 4.7%)                    | 0.76                                                 |                          |



**Table S10** Global and regional burden, mortality, incidence, and prevalence of neurological conditions in different regions of the world

| Measure                   | Region                                           | All Ages                     | Percent change<br>From 1990 to 2019 | Age-standardised         | Percent change<br>From 1990 to 2019 | Sex ratio<br>2019 |
|---------------------------|--------------------------------------------------|------------------------------|-------------------------------------|--------------------------|-------------------------------------|-------------------|
|                           |                                                  | Number (thousand)<br>2019    |                                     | Rate per 100 000<br>2019 |                                     |                   |
| Cause                     |                                                  | Mean (95% UI)                | Mean (95% UI)                       | Mean (95% UI)            | Mean (95% UI)                       | F:M               |
| Stroke                    | World Bank Lower Middle Income                   | 2538.3 (1939.6–2932.5)       | 59.5% (-6.2 to 114%)                | 84.4 (64.2–97.3)         | 0.6% (-36.8 to 27.1%)               | 0.71              |
|                           | World Bank Low Income                            | 449 (327.7–574.2)            | 93.8% (7.6 to 217.6%)               | 69.4 (50–87)             | 3.6% (-38.4 to 51.6%)               | 0.70              |
|                           | Global                                           | 125490.4 (116154.7–134427.9) | 27% (15.3 to 37.8%)                 | 1550 (1434.5–1660.7)     | -38% (-43.7 to -32.9%)              | 0.70              |
|                           | Southeast Asia, East Asia, and Oceania           | 57660.2 (51365.6–64077.9)    | 40.4% (20.1 to 62.6%)               | 2242.9 (1996.9–2488.9)   | -39.4% (-48.9 to -30%)              | 0.59              |
|                           | Central Europe, Eastern Europe, and Central Asia | 12856.1 (11824.3–13810.1)    | -10% (-16.4 to -3.4%)               | 2075.3 (1910.3–2228.8)   | -33.7% (-38.4 to -28.8%)            | 0.65              |
|                           | High-income                                      | 10552.5 (9480.3–11225.3)     | -25.5% (-30.1 to -21.7%)            | 489.7 (450.5–517.9)      | -59.1% (-60.6 to -57.2%)            | 0.73              |
|                           | Latin America and Caribbean                      | 5564.9 (5108.9–6048.1)       | 18% (8.6 to 27.8%)                  | 952.9 (874.5–1035.8)     | -52.1% (-55.8 to -48.2%)            | 0.79              |
|                           | North Africa and Middle East                     | 6832.3 (6014.8–7787.8)       | 34.5% (18 to 53.6%)                 | 1586.8 (1407–1782.8)     | -35.1% (-42.5 to -25.9%)            | 0.99              |
|                           | South Asia                                       | 22217.3 (19621.1–24900.1)    | 67.1% (42.6 to 93.9%)               | 1581.2 (1396.9–1772.1)   | -32.2% (-42.6 to -21.1%)            | 0.85              |
|                           | Sub-Saharan Africa                               | 9807.2 (8403.9–11288)        | 57.4% (35.8 to 82.4%)               | 2029.7 (1779–2312.4)     | -24% (-33.5 to -12.6%)              | 0.86              |
|                           | World Bank High Income                           | 12207.9 (11059.2–12975.5)    | -24.8% (-29.1 to -21.1%)            | 533.3 (492.6–563.6)      | -58.3% (-60 to -56.1%)              | 0.72              |
| Ischaemic stroke          | World Bank Upper Middle Income                   | 58612 (52137.9–65038.2)      | 20.8% (4.4 to 38.4%)                | 1806 (1608.7–2001.1)     | -45.4% (-52.5 to -37.8%)            | 0.61              |
|                           | World Bank Lower Middle Income                   | 46746.6 (42624.9–50644.2)    | 61.2% (44.4 to 77.3%)               | 1988.9 (1817.9–2152.7)   | -27.1% (-35.1 to -18.7%)            | 0.82              |
|                           | World Bank Low Income                            | 7850.4 (6614.1–9236.6)       | 56.2% (34.8 to 80.2%)               | 2395 (2026.2–2794.7)     | -22.8% (-32.1 to -12.3%)            | 0.86              |
|                           | Global                                           | 50349.7 (46232.4–54066.7)    | 48.1% (32.3 to 61.3%)               | 636.5 (582–683.1)        | -33.4% (-40 to -27.6%)              | 0.73              |
|                           | Southeast Asia, East Asia, and Oceania           | 21954.8 (19316–24774.8)      | 128.4% (78.2 to 169%)               | 895.5 (788.4–1006.2)     | -9.3% (-29.1 to 7.3%)               | 0.60              |
|                           | Central Europe, Eastern Europe, and Central Asia | 7994.2 (7300.2–8627.8)       | -10.7% (-18.2 to -3.3%)             | 1257 (1147.5–1356.3)     | -37% (-42.2 to -31.9%)              | 0.71              |
|                           | High-income                                      | 5397.8 (4700.8–5817.2)       | -30.8% (-36 to -26.9%)              | 215.7 (190.5–231.3)      | -65.9% (-68 to -64.2%)              | 0.76              |
|                           | Latin America and Caribbean                      | 2149.5 (1934.9–2331.4)       | 32.8% (20.2 to 46.9%)               | 383.7 (345–416.4)        | -52.4% (-56.7 to -47.6%)            | 0.73              |
|                           | North Africa and Middle East                     | 3874.1 (3427.8–4371.1)       | 112.9% (77.1 to 146.1%)             | 987.9 (880.9–1105.9)     | -11.1% (-23.3 to 1.3%)              | 1.03              |
|                           | South Asia                                       | 6573.8 (5508.5–7883.9)       | 120.4% (77 to 165.3%)               | 529.1 (448.4–627.8)      | -22% (-37.4 to -5.4%)               | 0.80              |
|                           | Sub-Saharan Africa                               | 2405.6 (2097.3–2871.8)       | 97.8% (68 to 128.2%)                | 633 (552.8–734.5)        | -4.2% (-18.3 to 9.4%)               | 1.01              |
| Intracerebral haemorrhage | World Bank High Income                           | 6449.2 (5649.4–6947.7)       | -29.1% (-34.3 to -25.3%)            | 248.7 (222.1–266.3)      | -64.2% (-66.3 to -62.4%)            | 0.76              |
|                           | World Bank Upper Middle Income                   | 26465.8 (23484.9–29270)      | 64.4% (41 to 85.3%)                 | 836.8 (744.2–923.6)      | -31.7% (-41.3 to -23.3%)            | 0.66              |
|                           | World Bank Lower Middle Income                   | 15464.8 (13644.3–17321.1)    | 97.1% (69.4 to 121.8%)              | 750.6 (667.4–832.4)      | -19.1% (-29.9 to -7.4%)             | 0.84              |
|                           | World Bank Low Income                            | 1944.6 (1625.6–2349.2)       | 104.4% (76.9 to 134.4%)             | 723.5 (608.7–867.2)      | -2.6% (-14.5 to 10.4%)              | 0.93              |
|                           | Global                                           | 65306.2 (60073.8–70392.3)    | 24% (10.4 to 35.4%)                 | 793.4 (731.2–854.6)      | -37.4% (-44.2 to -31.5%)            | 0.66              |
|                           | Southeast Asia, East Asia, and Oceania           | 32513.3 (28980.3–36184.3)    | 29.5% (9 to 50.2%)                  | 1225.2 (1091.4–1363.2)   | -43.9% (-53.1 to -34.9%)            | 0.58              |
|                           | Central Europe, Eastern Europe, and Central Asia | 4001 (3657.5–4317.3)         | -11.8% (-19.8 to -3.7%)             | 665.9 (608.3–719.7)      | -30.8% (-37.1 to -24.4%)            | 0.55              |
|                           | High-income                                      | 3708.6 (3426.1–3934.9)       | -22.9% (-27.5 to -18.9%)            | 187.7 (176.1–198.5)      | -55.1% (-57.3 to -52.9%)            | 0.61              |
|                           | Latin America and Caribbean                      | 2475.4 (2258.9–2720)         | 2.5% (-7.2 to 13.4%)                | 414.3 (378.4–455.3)      | -56.8% (-60.9 to -52.3%)            | 0.70              |
|                           | North Africa and Middle East                     | 2520 (2171.8–2943.1)         | 0.1% (-15.7 to 18.7%)               | 514 (447.9–593)          | -52.9% (-59.7 to -44.9%)            | 0.91              |
|                           | South Asia                                       | 13161.7 (11226.1–15312.2)    | 54% (29.8 to 78.9%)                 | 895.1 (764–1041.2)       | -36.2% (-46.4 to -25.6%)            | 0.87              |
| Sub-Saharan Africa        | 6926.3 (5854.9–8047.9)                           | 46.6% (25.5 to 71.7%)        | 1325.9 (1130.9–1532.5)              | -30.7% (-40.1 to -20.2%) | 0.81                                |                   |

**Table S10** Global and regional burden, mortality, incidence, and prevalence of neurological conditions in different regions of the world

| Measure                                          | Region                                           | All Ages                                   |                                                      | Age-standardised                          |                                                      | Sex ratio<br>2019<br>F:M |
|--------------------------------------------------|--------------------------------------------------|--------------------------------------------|------------------------------------------------------|-------------------------------------------|------------------------------------------------------|--------------------------|
|                                                  |                                                  | Number (thousand)<br>2019<br>Mean (95% UI) | Percent change<br>From 1990 to 2019<br>Mean (95% UI) | Rate per 100 000<br>2019<br>Mean (95% UI) | Percent change<br>From 1990 to 2019<br>Mean (95% UI) |                          |
| Subarachnoid haemorrhage                         | World Bank High Income                           | 4220.3 (3910.7–4484.5)                     | -23.3% (-27.9 to -19.5%)                             | 201 (188.4–213.5)                         | -54.7% (-57 to -52.5%)                               | 0.59                     |
|                                                  | World Bank Upper Middle Income                   | 28263.8 (24959.5–31809.1)                  | 11.3% (-6.5 to 29.8%)                                | 850.3 (750.8–954.5)                       | -48.3% (-56.5 to -40.1%)                             | 0.55                     |
|                                                  | World Bank Lower Middle Income                   | 27363.8 (24525.2–30212.7)                  | 52.1% (34 to 69%)                                    | 1094 (980.4–1207.1)                       | -30.2% (-38.7 to -22%)                               | 0.80                     |
|                                                  | World Bank Low Income                            | 5416.9 (4555.7–6430)                       | 44.7% (23.9 to 69.2%)                                | 1554.1 (1317.5–1829.1)                    | -29% (-38 to -18.4%)                                 | 0.84                     |
|                                                  | Global                                           | 9834.5 (8614.6–11416.4)                    | -19.1% (-30.7 to 12.6%)                              | 120.1 (105.5–139.2)                       | -57% (-63.3 to -39.8%)                               | 0.82                     |
|                                                  | Southeast Asia, East Asia, and Oceania           | 3192.1 (2629.6–3858.1)                     | -49.7% (-63.2 to -10.6%)                             | 122.1 (100.9–146.7)                       | -77.1% (-83.2 to -59%)                               | 0.65                     |
|                                                  | Central Europe, Eastern Europe, and Central Asia | 860.9 (773.6–958.1)                        | 9.3% (-5.5 to 26.2%)                                 | 152.4 (136.5–172.9)                       | -11.3% (-23.3 to 3.4%)                               | 0.64                     |
|                                                  | High-income                                      | 1446.1 (1353.8–1514.9)                     | -6.4% (-11.7 to 1%)                                  | 86.2 (81.8–90.9)                          | -40.1% (-43.1 to -34.3%)                             | 1.00                     |
|                                                  | Latin America and Caribbean                      | 940 (846.7–1042.8)                         | 37.9% (22.1 to 56.3%)                                | 154.8 (139.4–172)                         | -31.6% (-39.6 to -22.3%)                             | 1.26                     |
|                                                  | North Africa and Middle East                     | 438.2 (355.9–559.6)                        | -41% (-55.3 to 0.5%)                                 | 84.8 (69.4–107.1)                         | -64.9% (-73.3 to -43.4%)                             | 1.03                     |
|                                                  | South Asia                                       | 2481.8 (1550.3–3416.1)                     | 40.4% (9.1 to 141.7%)                                | 157 (96.9–216.2)                          | -37.6% (-52.2 to 7.1%)                               | 0.92                     |
|                                                  | Sub-Saharan Africa                               | 475.4 (270.4–1004.3)                       | 64% (20.1 to 134.9%)                                 | 70.8 (38.7–149)                           | -26% (-40.5 to 2.5%)                                 | 0.58                     |
|                                                  | Neurological disorders*                          | World Bank High Income                     | 1538.3 (1435.5–1616.4)                               | -6% (-11.1 to 2%)                         | 83.6 (79.1–88.5)                                     | -40.6% (-43.5 to -34.5%) |
| World Bank Upper Middle Income                   |                                                  | 3882.3 (3309.8–4473.3)                     | -44.7% (-56.5 to -10.2%)                             | 118.9 (101.9–136.5)                       | -72.7% (-78.5 to -55.1%)                             | 0.75                     |
| World Bank Lower Middle Income                   |                                                  | 3918 (2859.2–5185)                         | 23.6% (-1 to 89.9%)                                  | 144.4 (105–189.5)                         | -38.2% (-51.5 to -4.7%)                              | 0.86                     |
| World Bank Low Income                            |                                                  | 488.9 (266.8–970.4)                        | 47.6% (13.1 to 106.8%)                               | 117.4 (62.8–230.1)                        | -31.2% (-44.7 to -7.7%)                              | 0.76                     |
| Global                                           |                                                  | 32098.4 (18750.1–60829.3)                  | 81.3% (45 to 114.6%)                                 | 422.3 (243.2–806.2)                       | -7.4% (-16.5 to 2%)                                  | 0.91                     |
| Southeast Asia, East Asia, and Oceania           |                                                  | 8306.5 (4104.8–17907.5)                    | 84.2% (29 to 135.9%)                                 | 378.2 (182.9–797.3)                       | -15% (-30.3 to -1.6%)                                | 0.95                     |
| Central Europe, Eastern Europe, and Central Asia |                                                  | 2378.3 (1313.1–4674.3)                     | 44% (26.9 to 57.8%)                                  | 419.5 (248.4–793.8)                       | 1.5% (-5.4 to 8.2%)                                  | 0.83                     |
| High-income                                      |                                                  | 9355.8 (4981.4–18342.2)                    | 101.5% (83.9 to 110.9%)                              | 417.1 (251.8–754)                         | 0.6% (-2.7 to 3%)                                    | 0.88                     |
| Latin America and Caribbean                      |                                                  | 2505.7 (1436.3–4794.8)                     | 123.6% (76.1 to 166%)                                | 448.2 (252.5–865.1)                       | -4% (-12.8 to 4.6%)                                  | 0.84                     |
| North Africa and Middle East                     |                                                  | 1708.2 (1049.4–3130.8)                     | 68.3% (24.8 to 124.2%)                               | 447.2 (241.7–897.3)                       | -11.5% (-23.1 to 7.1%)                               | 0.97                     |
| South Asia                                       |                                                  | 5253.1 (3618.2–8795.2)                     | 54.2% (9.9 to 127.7%)                                | 411 (249.2–764)                           | -13.4% (-30.8 to 8.3%)                               | 0.98                     |
| Sub-Saharan Africa                               |                                                  | 2590.8 (1866.2–3969)                       | 90.4% (53.1 to 143.3%)                               | 484.4 (279.7–929.3)                       | 0.3% (-13.1 to 14.4%)                                | 0.83                     |
| Alzheimer's disease and other dementias          |                                                  | World Bank High Income                     | 10001.5 (5358.4–19600.6)                             | 98.9% (81.1 to 108.8%)                    | 418.4 (253.1–759.7)                                  | -0.4% (-3.5 to 2.2%)     |
|                                                  | World Bank Upper Middle Income                   | 11456.7 (5971.3–23998.3)                   | 80.9% (31.4 to 124.7%)                               | 398.6 (206.9–816.7)                       | -12.7% (-24.7 to -2.5%)                              | 0.90                     |
|                                                  | World Bank Lower Middle Income                   | 8899.6 (5902.4–15498.6)                    | 66.9% (28 to 121.2%)                                 | 419 (246.6–809.3)                         | -7.4% (-20.7 to 9.8%)                                | 0.95                     |
|                                                  | World Bank Low Income                            | 1722.8 (1238–2734.1)                       | 71.3% (35.7 to 125.6%)                               | 479 (269.9–934.7)                         | -5.9% (-19.8 to 7.1%)                                | 0.87                     |
|                                                  | Global                                           | 17859.9 (4374.6–47064.8)                   | 160.3% (145.7 to 181.7%)                             | 239.8 (58.5–627.2)                        | 2.9% (-1.5 to 9.8%)                                  | 1.15                     |
|                                                  | Southeast Asia, East Asia, and Oceania           | 5448.3 (1303.4–15160.3)                    | 191.2% (155.8 to 241.7%)                             | 254.2 (60.6–679.9)                        | -1.2% (-12.4 to 14.7%)                               | 1.24                     |
|                                                  | Central Europe, Eastern Europe, and Central Asia | 1413.6 (331.5–3778.6)                      | 72.4% (60.8 to 87.3%)                                | 226.8 (52.9–601.1)                        | 3.9% (-1.7 to 10.9%)                                 | 1.06                     |
|                                                  | High-income                                      | 5980.1 (1529.1–15164.3)                    | 130.1% (116.2 to 151.2%)                             | 225.5 (57.2–572.7)                        | 2.3% (-2.1 to 8.3%)                                  | 1.15                     |
|                                                  | Latin America and Caribbean                      | 1417.9 (345.7–3739.7)                      | 236.8% (213.6 to 269.3%)                             | 259.9 (63.7–682.7)                        | 1.4% (-4.8 to 10.1%)                                 | 1.02                     |
|                                                  | North Africa and Middle East                     | 855.9 (207.4–2304.9)                       | 173.2% (151.8 to 232.1%)                             | 274.2 (67.3–727.7)                        | -2.6% (-9.7 to 17.2%)                                | 1.13                     |



**Table S10** Global and regional burden, mortality, incidence, and prevalence of neurological conditions in different regions of the world

| Measure             | Cause               | Region                                           | All Ages                |                          | Age-standardised        |                          | Sex ratio<br>2019<br>F:M |
|---------------------|---------------------|--------------------------------------------------|-------------------------|--------------------------|-------------------------|--------------------------|--------------------------|
|                     |                     |                                                  | Number (thousand)       | Percent change           | Rate per 100 000        | Percent change           |                          |
|                     |                     |                                                  | 2019                    | From 1990 to 2019        | 2019                    | From 1990 to 2019        |                          |
|                     |                     | Mean (95% UI)                                    | Mean (95% UI)           | Mean (95% UI)            | Mean (95% UI)           |                          |                          |
| Parkinson's disease |                     | South Asia                                       | 1989·3 (475·2–5545)     | 272·3% (224·7 to 332·4%) | 202·2 (48·4–553·4)      | 12·8% (-0·4 to 30·6%)    | 1·07                     |
|                     |                     | Sub-Saharan Africa                               | 754·8 (179·2–2009)      | 150·1% (129·5 to 173·7%) | 265 (65·5–718·3)        | 10·8% (3 to 21·2%)       | 1·16                     |
|                     |                     | World Bank High Income                           | 6373·3 (1628·7–16173·3) | 128·9% (115·3 to 149·9%) | 227·2 (57·7–578·6)      | 2% (-2·3 to 7·7%)        | 1·15                     |
|                     |                     | World Bank Upper Middle Income                   | 7234·2 (1726·7–19986·6) | 182·2% (154·8 to 221·1%) | 251·7 (61·2–676·3)      | 0·4% (-8·3 to 11·8%)     | 1·15                     |
|                     |                     | World Bank Lower Middle Income                   | 3716·8 (849·7–10334)    | 185·8% (162·5 to 221·9%) | 225·8 (54·2–616·6)      | 6·1% (-2·1 to 20·2%)     | 1·12                     |
|                     |                     | World Bank Low Income                            | 526·4 (126·6–1428·7)    | 152·4% (130·6 to 178·4%) | 264·8 (65–719·1)        | 6·9% (-1·2 to 17·6%)     | 1·17                     |
|                     |                     | Global                                           | 5082·5 (4673·4–5409·9)  | 123·5% (105·6 to 139·9%) | 64·9 (59·6–69·2)        | -0·3% (-7·9 to 6·5%)     | 0·54                     |
|                     |                     | Southeast Asia, East Asia, and Oceania           | 1542·8 (1344·6–1723)    | 120·5% (87·5 to 156·6%)  | 64·4 (56·2–71·7)        | -16·2% (-28·2 to -3·1%)  | 0·53                     |
|                     |                     | Central Europe, Eastern Europe, and Central Asia | 387·5 (352·4–416·7)     | 51·9% (41·5 to 64·3%)    | 60·3 (54·8–64·9)        | 5·5% (-1·4 to 14%)       | 0·55                     |
|                     |                     | High-income                                      | 1477·8 (1329·1–1560·9)  | 110·7% (100·4 to 117·8%) | 61·2 (55·6–64·3)        | 10·6% (6·4 to 13·8%)     | 0·45                     |
|                     |                     | Latin America and Caribbean                      | 339·3 (304·1–371·3)     | 203·1% (180·1 to 229·6%) | 61·4 (55–67·2)          | 2·6% (-4·9 to 11·3%)     | 0·59                     |
|                     |                     | North Africa and Middle East                     | 256·2 (225·1–319·5)     | 158·7% (125·3 to 202·8%) | 72·7 (63·9–91·5)        | -1% (-13·1 to 15·8%)     | 0·67                     |
|                     |                     | South Asia                                       | 853·8 (737·9–984·5)     | 178·7% (127·6 to 233·8%) | 72 (62·1–83)            | -5·2% (-22 to 13·8%)     | 0·66                     |
|                     |                     | Sub-Saharan Africa                               | 225·1 (198·3–264·3)     | 123·2% (90·2 to 157·9%)  | 66·5 (58·5–78·7)        | 6·8% (-8 to 22·5%)       | 0·66                     |
|                     | Idiopathic epilepsy |                                                  | World Bank High Income  | 1572·3 (1416·3–1660)     | 108·7% (98·3 to 115·9%) | 61·2 (55·6–64·4)         | 9·8% (5·5 to 13·2%)      |
|                     |                     | World Bank Upper Middle Income                   | 1931·9 (1721·3–2117·2)  | 116% (90·1 to 143·6%)    | 62 (55·4–67·9)          | -12·7% (-22·8 to -2·4%)  | 0·54                     |
|                     |                     | World Bank Lower Middle Income                   | 1410·3 (1268·9–1552·1)  | 158·5% (119·6 to 192·9%) | 72·4 (65·4–79·8)        | 4·5% (-10·6 to 17·8%)    | 0·65                     |
|                     |                     | World Bank Low Income                            | 165·2 (142–196·2)       | 106·6% (78·8 to 135·8%)  | 67·5 (57·8–81·3)        | -3·2% (-15·3 to 9·3%)    | 0·63                     |
|                     |                     | Global                                           | 5336·8 (4722·7–6170)    | -9·5% (-24·1 to 27·5%)   | 69·5 (61·7–80·6)        | -33·6% (-44 to -7·6%)    | 0·71                     |
|                     |                     | Southeast Asia, East Asia, and Oceania           | 760·6 (662·3–891·8)     | -45·6% (-55·9 to -27·5%) | 35·4 (31–41·6)          | -54·6% (-63 to -39·5%)   | 0·57                     |
|                     |                     | Central Europe, Eastern Europe, and Central Asia | 289·5 (262–319·4)       | -6·9% (-15·3 to 2·2%)    | 71·2 (64·2–79·4)        | -5·3% (-14·2 to 4·9%)    | 0·57                     |
|                     |                     | High-income                                      | 411·9 (369–428·9)       | 9·5% (-5·5 to 14·5%)     | 34·4 (31·4–35·7)        | -15·2% (-25·7 to -11·3%) | 0·67                     |
|                     |                     | Latin America and Caribbean                      | 429 (378–491·3)         | 2·8% (-11·3 to 22·9%)    | 72·8 (64·1–83·7)        | -29·5% (-38·9 to -16·5%) | 0·63                     |
|                     |                     | North Africa and Middle East                     | 352·2 (279·1–412·5)     | -18·1% (-37·2 to 39%)    | 57·3 (45·6–67·2)        | -44·4% (-55·6 to -11·7%) | 0·89                     |
|                     |                     | South Asia                                       | 1870·9 (1541·6–2310·1)  | -15·8% (-36·2 to 41·5%)  | 105·1 (86·1–129·8)      | -44·3% (-56·5 to -11%)   | 1·06                     |
|                     |                     | Sub-Saharan Africa                               | 1222·9 (989·8–1571·6)   | 64·5% (25·6 to 161·4%)   | 116·2 (95·9–149·2)      | -19% (-36·2 to 16·4%)    | 0·42                     |
|                     |                     | World Bank High Income                           | 497·9 (450·8–524·5)     | 11% (-2·3 to 18·3%)      | 37·5 (35–39·7)          | -14·9% (-24·1 to -9·2%)  | 0·66                     |
|                     |                     | World Bank Upper Middle Income                   | 1238 (1109·5–1388·7)    | -38·1% (-46·8 to -21·7%) | 47·5 (42·6–53·7)        | -48% (-55·2 to -33·7%)   | 0·62                     |
|                     |                     | World Bank Lower Middle Income                   | 2782·5 (2339·8–3471)    | -3·1% (-24·4 to 58·3%)   | 88·1 (73·6–109·4)       | -36·6% (-49·3 to -2·5%)  | 0·83                     |
| Multiple sclerosis  |                     | World Bank Low Income                            | 815·1 (680·3–999·6)     | 41·8% (7·7 to 133·6%)    | 115·9 (98–140·1)        | -25·8% (-40·9 to 10·6%)  | 0·53                     |
|                     |                     | Global                                           | 708·6 (645·1–897·8)     | 53·2% (35·6 to 73·7%)    | 8·5 (7·7–10·7)          | -17·4% (-27·9 to -7·6%)  | 1·38                     |
|                     |                     | Southeast Asia, East Asia, and Oceania           | 89·9 (74–120·5)         | 38·9% (3·5 to 112·3%)    | 3·3 (2·7–4·3)           | -26·3% (-44·6 to 11·3%)  | 0·91                     |
|                     |                     | Central Europe, Eastern Europe, and Central Asia | 94·2 (67·2–173·7)       | -12·2% (-32·5 to 35·5%)  | 17·9 (12·7–33·2)        | -25% (-42·8 to 17·7%)    | 1·32                     |

**Table S10** Global and regional burden, mortality, incidence, and prevalence of neurological conditions in different regions of the world

| Measure                        |                                                  | All Ages               |                          | Age-standardised       |                          | Sex ratio |
|--------------------------------|--------------------------------------------------|------------------------|--------------------------|------------------------|--------------------------|-----------|
|                                |                                                  | Number (thousand)      | Percent change           | Rate per 100 000       | Percent change           |           |
| Cause                          | Region                                           | 2019                   | From 1990 to 2019        | 2019                   | From 1990 to 2019        | 2019      |
|                                |                                                  | Mean (95% UI)          | Mean (95% UI)            | Mean (95% UI)          | Mean (95% UI)            | F:M       |
| Motor neuron disease           | High-income                                      | 285.7 (218.6–353.6)    | 49% (3.4 to 64.9%)       | 17.7 (13.8–22.2)       | -0.8% (-28 to 8.6%)      | 1.58      |
|                                | Latin America and Caribbean                      | 38.1 (31.3–48.4)       | 159.1% (87.9 to 205.8%)  | 6.2 (5.1–7.8)          | 19.1% (-14.2 to 40.9%)   | 1.24      |
|                                | North Africa and Middle East                     | 58.2 (45.2–80.4)       | 126.5% (55.9 to 238%)    | 9.9 (7.8–13.6)         | 1.8% (-27.9 to 52.7%)    | 1.34      |
|                                | South Asia                                       | 105.7 (86.3–134.8)     | 133.9% (73.8 to 248.1%)  | 6.3 (5.2–8)            | 8.9% (-17.9 to 63.7%)    | 1.32      |
|                                | Sub-Saharan Africa                               | 36.9 (29.3–49.7)       | 177.6% (95.4 to 276.3%)  | 5.5 (4.4–7.4)          | 16.2% (-15.9 to 57.7%)   | 1.57      |
|                                | World Bank High Income                           | 313.2 (244.2–390.5)    | 40.7% (1.4 to 56.4%)     | 17.7 (14.1–22.7)       | -7.4% (-30.9 to 6.1%)    | 1.58      |
|                                | World Bank Upper Middle Income                   | 181.4 (152.5–250.9)    | 32.8% (9.4 to 72.7%)     | 5.5 (4.6–7.5)          | -25.9% (-38.7 to -5.1%)  | 1.17      |
|                                | World Bank Lower Middle Income                   | 189.2 (160.3–245.8)    | 103.4% (62.1 to 169.6%)  | 6.5 (5.5–8.4)          | -1.4% (-20.3 to 29.8%)   | 1.28      |
|                                | World Bank Low Income                            | 24.5 (17.4–34.1)       | 140.7% (74.1 to 215.9%)  | 5.4 (3.8–7.4)          | 5.4% (-20.8 to 37.8%)    | 1.47      |
|                                | Global                                           | 977.5 (926.3–1025.4)   | 65.5% (54.5 to 78.2%)    | 11.9 (11.3–12.5)       | -4.9% (-10.7 to 1.9%)    | 0.71      |
|                                | Southeast Asia, East Asia, and Oceania           | 122.3 (106.7–138)      | -21.6% (-34.6 to -6.5%)  | 5 (4.4–5.6)            | -47.7% (-56.3 to -37.9%) | 0.59      |
|                                | Central Europe, Eastern Europe, and Central Asia | 51.8 (46.9–56.6)       | 92.3% (63.1 to 118.2%)   | 9.4 (8.5–10.3)         | 49.8% (28.4 to 69.8%)    | 0.67      |
|                                | High-income                                      | 603.8 (569.7–631.1)    | 88.3% (79.2 to 96.4%)    | 35.2 (33.4–36.7)       | 12.6% (7.6 to 17.6%)     | 0.70      |
|                                | Latin America and Caribbean                      | 86 (76–95.3)           | 232.6% (186.7 to 276.3%) | 14.4 (12.7–16)         | 72.9% (49.2 to 94.7%)    | 0.68      |
|                                | North Africa and Middle East                     | 38.3 (30.6–47.1)       | 18.4% (-32.8 to 87.7%)   | 7.3 (5.8–9)            | -17.8% (-47.1 to 19.1%)  | 0.72      |
|                                | South Asia                                       | 65.7 (51.4–81.3)       | 180.6% (124.6 to 242.8%) | 4.1 (3.2–5.1)          | 50.2% (18.9 to 89.1%)    | 0.80      |
|                                | Sub-Saharan Africa                               | 9.6 (8–11.8)           | 79.6% (36.9 to 127%)     | 1.2 (1–1.5)            | -20.1% (-41 to 5.6%)     | 1.14      |
|                                | World Bank High Income                           | 619.4 (584–648.6)      | 87.2% (77.9 to 95.6%)    | 33.3 (31.5–34.8)       | 11.7% (6.6 to 16.7%)     | 0.71      |
|                                | World Bank Upper Middle Income                   | 244.6 (223.5–266.1)    | 15.8% (-1.1 to 35.2%)    | 8 (7.3–8.7)            | -24% (-34.9 to -11.7%)   | 0.64      |
| World Bank Lower Middle Income | 104.2 (90.2–120.2)                               | 146.8% (106.9 to 189%) | 3.8 (3.2–4.3)            | 33.4% (9.9 to 59.4%)   | 0.77                     |           |
| World Bank Low Income          | 8.8 (7–10.8)                                     | 46.1% (4.5 to 88.5%)   | 1.7 (1.3–2.1)            | -16.9% (-36.8 to 3.8%) | 1.05                     |           |
| Other neurological disorders   | Global                                           | 2133 (1915.2–2381.1)   | 31.4% (16.2 to 49.6%)    | 27.7 (24.7–31)         | -8.9% (-19.1 to 3.5%)    | 0.72      |
|                                | Southeast Asia, East Asia, and Oceania           | 342.6 (298.8–398.1)    | 6.8% (-12.2 to 28.6%)    | 16 (14–18.5)           | -16% (-30.8 to 1.1%)     | 0.56      |
|                                | Central Europe, Eastern Europe, and Central Asia | 141.8 (129.6–154.2)    | 8.2% (-1.8 to 18.3%)     | 33.9 (30.8–36.9)       | 3.5% (-6.6 to 13.6%)     | 0.61      |
|                                | High-income                                      | 596.5 (572.9–615.1)    | 31.5% (27.2 to 35.9%)    | 43.2 (41.7–44.7)       | -11.8% (-15.6 to -8.3%)  | 0.66      |
|                                | Latin America and Caribbean                      | 195.4 (176.4–216.1)    | 50.7% (35.2 to 67.7%)    | 33.5 (30.1–37.2)       | -0.4% (-10.8 to 10.7%)   | 0.66      |
|                                | North Africa and Middle East                     | 147.4 (127.9–171.8)    | 28.8% (-3.1 to 67.3%)    | 25.7 (22.4–29.9)       | -9.5% (-30 to 15.6%)     | 0.61      |
|                                | South Asia                                       | 367.8 (266.2–505.5)    | 32.8% (12.5 to 85.8%)    | 21.3 (15.5–29.2)       | -4.3% (-21.6 to 28%)     | 1.04      |
|                                | Sub-Saharan Africa                               | 341.4 (265.4–436.3)    | 74.4% (23.8 to 135.5%)   | 30 (24.4–36.7)         | -6.5% (-30.4 to 20.9%)   | 0.86      |
|                                | World Bank High Income                           | 625.4 (599.7–645.9)    | 28.2% (23.9 to 32.5%)    | 41.5 (39.8–43)         | -14.2% (-18.1 to -10.8%) | 0.66      |
|                                | World Bank Upper Middle Income                   | 626.6 (576–676.8)      | 18.5% (4.4 to 34.7%)     | 23.9 (21.9–25.9)       | -6% (-17.4 to 6.9%)      | 0.62      |
|                                | World Bank Lower Middle Income                   | 696.6 (538.8–895.5)    | 45.5% (17.2 to 86.2%)    | 22.5 (17.5–28.7)       | 1.1% (-18.5 to 26.2%)    | 0.89      |

**Table S10** Global and regional burden, mortality, incidence, and prevalence of neurological conditions in different regions of the world

|                |                       | <b>All Ages</b>     |                      | <b>Age-standardised</b> |                        |           |
|----------------|-----------------------|---------------------|----------------------|-------------------------|------------------------|-----------|
|                |                       | Number (thousand)   | Percent change       | Rate per 100 000        | Percent change         | Sex ratio |
| <b>Measure</b> |                       | 2019                | From 1990 to 2019    | 2019                    | From 1990 to 2019      | 2019      |
| Cause          | Region                | Mean (95% UI)       | Mean (95% UI)        | Mean (95% UI)           | Mean (95% UI)          | F:M       |
|                | World Bank Low Income | 182·9 (146·3–227·5) | 45·1% (9·8 to 99·1%) | 23·7 (19·2–29·4)        | -16·7% (-35·4 to 7·9%) | 0·78      |

Data in parentheses are 95% uncertainty intervals. Count data in thousands and percentage data are rounded to one decimal place, and sex ratio is rounded to two decimal places. Percentages and number of DALYs, YLDs, YLLs, deaths, incident cases, and prevalent cases are not mutually exclusive: the sum of percentages and number of DALYs, YLDs, YLLs, deaths, incident cases, and prevalent cases in the columns exceeds the totals for all causes combined because of overlap between various causes. Measures with insufficient data are not reported here. DALYs Disability-Adjusted Life Years; F:M, Female to male ratio; NA, no data available; UI uncertainty interval; YLDs Years Lived with Disability; YLLs Years of Life Lost; \*Stroke include ischaemic stroke, intracerebral haemorrhage, and subarachnoid haemorrhage; †Neurological disorders include Alzheimer's disease and other dementias, Parkinson's disease, idiopathic epilepsy, multiple sclerosis, headache disorders (including migraine and tension-type headache), motor neuron disease, and other neurological disorders.

***Table S11 Cause- and sex-specific burden, mortality, incidence, and prevalence of neurological conditions in North Africa and Middle East countries***

(NEXT PAGE)

|                                |     |
|--------------------------------|-----|
| Disability-Adjusted Life Years | 144 |
| Deaths                         | 152 |
| Incidence                      | 159 |
| Prevalence                     | 168 |
| Years Lived with Disability    | 178 |
| Years of Life Lost             | 187 |

**Table S11** Cause- and sex-specific burden, mortality, incidence, and prevalence of neurological conditions in North Africa and Middle East countries

| Measure                                       |                              | All Ages                  |                          | Age-standardised    |                          | Sex ratio<br>2019<br>F:M |
|-----------------------------------------------|------------------------------|---------------------------|--------------------------|---------------------|--------------------------|--------------------------|
|                                               |                              | Number (thousand)         | Percent change           | Rate per 100,000    | Percent change           |                          |
|                                               |                              | 2019                      | From 1990 to 2019        | 2019                | From 1990 to 2019        |                          |
| Cause                                         | Location                     | Mean (95% UI)             | Mean (95% UI)            | Mean (95% UI)       | Mean (95% UI)            | F:M                      |
| <b>DALYs (Disability-Adjusted Life Years)</b> |                              |                           |                          |                     |                          |                          |
| Meningitis                                    | Global                       | 16333.2 (13775.1–19609.8) | -51.3% (-59.4 to -42%)   | 234 (195.8–282.5)   | -57.2% (-64.4 to -48.6%) | 0.86                     |
|                                               | North Africa and Middle East | 412.8 (345.2–495)         | -70.5% (-77.5 to -62.3%) | 70 (58.7–83.7)      | -75.8% (-81.1 to -69.5%) | 0.91                     |
|                                               | Algeria                      | 16.2 (13.3–20.1)          | -74.7% (-84.2 to -61.1%) | 40 (33.1–49.1)      | -80.2% (-87 to -70.7%)   | 1.01                     |
|                                               | Bahrain                      | 0.2 (0.2–0.2)             | -42.7% (-55.7 to -26.8%) | 18.6 (15.8–21.8)    | -74.5% (-79.6 to -67.8%) | 0.77                     |
|                                               | Egypt                        | 54.6 (37.5–74.3)          | -68.1% (-78.3 to -54.2%) | 54 (37.4–73.2)      | -75.7% (-83.3 to -65.6%) | 0.7                      |
|                                               | Iran                         | 30.1 (26.2–34.4)          | -79% (-84.1 to -71.6%)   | 38.6 (33.5–44.3)    | -79.2% (-84.1 to -72.5%) | 0.94                     |
|                                               | Iraq                         | 28.4 (22.2–36.3)          | -69.6% (-79 to -56.4%)   | 67.4 (53.4–84.6)    | -80% (-85.7 to -72.4%)   | 0.91                     |
|                                               | Jordan                       | 5.9 (4.7–7.5)             | 5% (-25.9 to 50.7%)      | 52.6 (42.4–66.4)    | -56.5% (-68 to -39.5%)   | 0.98                     |
|                                               | Kuwait                       | 0.7 (0.6–0.9)             | -22% (-40.2 to -0.4%)    | 20.1 (16.2–24.7)    | -63.1% (-71.8 to -53.2%) | 0.67                     |
|                                               | Lebanon                      | 1.5 (1.2–2)               | -58.8% (-72.1 to -40.5%) | 29.5 (22.2–38.5)    | -68.6% (-78 to -56.1%)   | 0.8                      |
|                                               | Libya                        | 2.2 (1.7–2.8)             | -68% (-78.4 to -53.9%)   | 36.2 (28.4–45.8)    | -69.9% (-78.5 to -58.4%) | 0.94                     |
|                                               | Morocco                      | 22.1 (15.5–30)            | -82.9% (-89.4 to -74.2%) | 68.4 (47.7–94.1)    | -82% (-88.5 to -73.2%)   | 0.74                     |
|                                               | Palestine                    | 2 (1.6–2.4)               | -75% (-83.4 to -62%)     | 40.5 (34.1–48.3)    | -82.6% (-87.6 to -75.4%) | 0.79                     |
|                                               | Oman                         | 0.7 (0.6–0.9)             | -63.1% (-74.1 to -46.1%) | 24.5 (20.8–29.5)    | -73.9% (-80.2 to -63.3%) | 1.35                     |
|                                               | Qatar                        | 0.5 (0.4–0.6)             | 34.9% (-9.8 to 93.7%)    | 25.4 (20.7–31.2)    | -73.1% (-81.8 to -62.7%) | 2.08                     |
|                                               | Saudi Arabia                 | 8.5 (6.6–11.1)            | -41.8% (-56.5 to -19.7%) | 26.7 (21.3–33.5)    | -73.3% (-79.4 to -63.2%) | 1.22                     |
|                                               | Syrian Arab Republic         | 13.5 (10.4–17.2)          | -80.1% (-86.4 to -71.2%) | 100 (76.6–129.5)    | -70.7% (-79.4 to -58.5%) | 0.93                     |
|                                               | Tunisia                      | 4.1 (3.5–5.2)             | -76.3% (-84.4 to -64.1%) | 37.9 (28.2–48.2)    | -77.1% (-84.8 to -66.2%) | 0.72                     |
|                                               | Türkiye                      | 17.2 (14.4–20.6)          | -90.8% (-94.3 to -85.7%) | 25.9 (21.4–31.9)    | -89.9% (-93.7 to -84.5%) | 0.77                     |
|                                               | United Arab Emirates         | 2.8 (1.8–4.1)             | 26.4% (-21.2 to 80.3%)   | 32.1 (22.2–43.8)    | -73.9% (-81.3 to -65.7%) | 0.74                     |
|                                               | Yemen                        | 33.1 (22.3–48.2)          | -55.4% (-71.8 to -29.7%) | 97.4 (68.3–136.9)   | -68.5% (-78.6 to -54.1%) | 1.04                     |
|                                               | Afghanistan                  | 121.3 (88.6–171.7)        | -30.5% (-55 to 6.9%)     | 244.7 (184.6–325.7) | -73.6% (-82.1 to -62.4%) | 1.12                     |
|                                               | Sudan                        | 46.7 (30.9–71.1)          | -79.9% (-87.4 to -69%)   | 100.3 (68.9–144.1)  | -85.1% (-90.2 to -77.6%) | 0.75                     |
| Encephalitis                                  | Global                       | 4797.4 (4059.5–6418.1)    | -43.4% (-55.8 to -15.8%) | 65.3 (55.1–87.3)    | -54.3% (-63.9 to -32.9%) | 0.87                     |
|                                               | North Africa and Middle East | 251 (200.2–332.9)         | 13.5% (-21 to 59.6%)     | 42 (33.6–55.6)      | -20.7% (-43.3 to 8.7%)   | 1.09                     |
|                                               | Algeria                      | 8.3 (5.9–14.7)            | -2.5% (-38.8 to 49.8%)   | 20.1 (14.4–35.4)    | -28.7% (-52.4 to 3.6%)   | 0.98                     |
|                                               | Bahrain                      | 0.1 (0.1–0.2)             | 69.5% (28.5 to 110.5%)   | 11.4 (9.2–13.8)     | -25.8% (-43.7 to -8.4%)  | 0.98                     |
|                                               | Egypt                        | 65 (33.5–102.5)           | -4.1% (-43.1 to 56%)     | 62.8 (33.5–98.7)    | -31.9% (-58.4 to 4.5%)   | 0.87                     |
|                                               | Iran                         | 12.7 (10.2–14.6)          | -13.4% (-37.5 to 14.3%)  | 16.3 (12.8–19)      | -22.1% (-41.5 to -0.8%)  | 0.93                     |
|                                               | Iraq                         | 30.4 (21.1–40.4)          | 17.8% (-27.9 to 88.4%)   | 70.5 (50.3–92.5)    | -33.8% (-56.9 to -2%)    | 1.11                     |
|                                               | Jordan                       | 1.3 (1.1–1.7)             | 2.4% (-35.5 to 154.6%)   | 10.9 (8.6–14.6)     | -60.2% (-74.1 to -9.7%)  | 1.24                     |
|                                               | Kuwait                       | 0.4 (0.3–0.5)             | 54.1% (26.4 to 92%)      | 10.5 (8.6–13.3)     | -26.5% (-40.1 to -8.6%)  | 1.27                     |
|                                               | Lebanon                      | 0.9 (0.6–1.6)             | 14.4% (-22 to 59.7%)     | 17.5 (11.8–30.6)    | -19.2% (-42.9 to 10.2%)  | 1.03                     |
|                                               | Libya                        | 1 (0.7–1.9)               | 5.4% (-30.5 to 52.9%)    | 17.4 (11.9–31.6)    | -11.6% (-37.5 to 25.4%)  | 0.99                     |
|                                               | Morocco                      | 8.6 (5.3–16.3)            | -6.2% (-42.2 to 41.4%)   | 26 (15.6–48.9)      | -16.9% (-45.8 to 23.8%)  | 1.42                     |
|                                               | Palestine                    | 0.8 (0.6–1.1)             | 51.1% (-4.7 to 118.9%)   | 16.3 (13.1–22.1)    | -21.8% (-43.6 to 3.1%)   | 1.19                     |
|                                               | Oman                         | 4.5 (3.3–7.8)             | 7.8% (-31.4 to 67.1%)    | 122.1 (94–180.3)    | -44.1% (-62.4 to -14.1%) | 0.67                     |
|                                               | Qatar                        | 0.3 (0.2–0.4)             | 264.1% (136.5 to 425.7%) | 13.3 (9.9–17.6)     | -29.3% (-52.7 to 0.9%)   | 1.34                     |
|                                               | Saudi Arabia                 | 9.5 (7.1–12.8)            | 2.3% (-28.7 to 51.7%)    | 28.2 (21.6–37.8)    | -53% (-68.2 to -29.9%)   | 1.27                     |
|                                               | Syrian Arab Republic         | 3.7 (2.9–4.9)             | -52.8% (-70.3 to -17.7%) | 27.4 (21.1–36.6)    | -41% (-61.4 to -1.9%)    | 0.96                     |
|                                               | Tunisia                      | 2 (1.3–3.7)               | -18.8% (-49.5 to 18.9%)  | 18.4 (12.1–34.4)    | -28.7% (-54.5 to 2.7%)   | 0.93                     |
|                                               | Türkiye                      | 13.2 (10.8–16)            | -42.9% (-64.2 to -15%)   | 18.6 (14.9–22.9)    | -47.4% (-66.5 to -22.2%) | 0.97                     |
|                                               | United Arab Emirates         | 1.5 (0.9–3)               | 225.1% (113.7 to 388%)   | 18.4 (11.9–34.1)    | -19.5% (-44.4 to 18%)    | 0.76                     |
|                                               | Yemen                        | 11.4 (6.7–21.4)           | 52.7% (-12.4 to 168.5%)  | 31.3 (19.4–57.9)    | -7.1% (-41.7 to 47.1%)   | 1.19                     |
|                                               | Afghanistan                  | 60.2 (39.1–116.1)         | 156.9% (74 to 263.1%)    | 175.8 (131.7–248.4) | -14.2% (-38.4 to 17.5%)  | 1.44                     |
|                                               | Sudan                        | 14.9 (8.7–27.4)           | 15.7% (-37.4 to 120.1%)  | 32.1 (19.6–58.4)    | -22.1% (-53.8 to 30.3%)  | 1.07                     |
| Tetanus                                       | Global                       | 2316.4 (1770–3279.4)      | -89.4% (-92.1 to -83.8%) | 33.7 (25.6–47.9)    | -90.2% (-92.7 to -85.1%) | 0.86                     |

**Table S11** Cause- and sex-specific burden, mortality, incidence, and prevalence of neurological conditions in North Africa and Middle East countries

| Measure                                 | Cause | Location                     | All Ages                     |                                     | Age-standardised         |                                     | Sex ratio<br>2019<br>F:M |
|-----------------------------------------|-------|------------------------------|------------------------------|-------------------------------------|--------------------------|-------------------------------------|--------------------------|
|                                         |       |                              | Number (thousand)<br>2019    | Percent change<br>From 1990 to 2019 | Rate per 100,000<br>2019 | Percent change<br>From 1990 to 2019 |                          |
|                                         |       |                              | Mean (95% UI)                | Mean (95% UI)                       | Mean (95% UI)            | Mean (95% UI)                       |                          |
|                                         |       | North Africa and Middle East | 87.4 (53.6–139.5)            | -85.8% (-92.9 to -68.7%)            | 15 (9.2–24.1)            | -88.2% (-93.9 to -76.1%)            | 0.85                     |
|                                         |       | Algeria                      | 0.5 (0.4–0.9)                | -83% (-93.5 to -41.9%)              | 1.3 (0.9–2.3)            | -86.7% (-94.8 to -60.7%)            | 0.79                     |
|                                         |       | Bahrain                      | <0.1 (<0.1–<0.1)             | 37.3% (-40.9 to 115%)               | 0.7 (0.6–1.2)            | -39.3% (-75 to -6.6%)               | 1.00                     |
|                                         |       | Egypt                        | 7.4 (2.2–22)                 | -87.3% (-96.4 to -60.1%)            | 7.7 (2.5–23.2)           | -90.8% (-97 to -71.7%)              | 0.69                     |
|                                         |       | Iran                         | 0.9 (0.7–1.3)                | -94.4% (-97.6 to -82.1%)            | 1.2 (0.9–1.7)            | -94.1% (-97.4 to -82.3%)            | 0.74                     |
|                                         |       | Iraq                         | 1.8 (1–3)                    | -91.2% (-97.3 to -53.5%)            | 4 (2.3–6.7)              | -93.8% (-98 to -72.8%)              | 0.56                     |
|                                         |       | Jordan                       | 0.1 (0.1–0.2)                | -71.7% (-86.8 to -12.3%)            | 1 (0.7–1.5)              | -85.7% (-93.3 to -59%)              | 0.72                     |
|                                         |       | Kuwait                       | <0.1 (<0.1–<0.1)             | 86.7% (-69.6 to 628.3%)             | <0.1 (<0.1–0.1)          | -46.1% (-88.3 to 68%)               | 0.1                      |
|                                         |       | Lebanon                      | 0.8 (0.2–2.7)                | -57.9% (-93 to 27.8%)               | 14.9 (3.2–50.9)          | -75.8% (-95.7 to -29.1%)            | 1.11                     |
|                                         |       | Libya                        | 0.1 (0–0.1)                  | -69.7% (-88.1 to -8.1%)             | 1.2 (0.7–2)              | -70.5% (-89.8 to -19%)              | 0.72                     |
|                                         |       | Morocco                      | 7.7 (1.9–28.9)               | -95% (-98.8 to -80.8%)              | 25.7 (6.3–98.1)          | -93.9% (-98.5 to -76.2%)            | 0.84                     |
|                                         |       | Palestine                    | 0.1 (0.1–0.1)                | -90.5% (-97.4 to -52.5%)            | 1.3 (0.9–1.9)            | -92.7% (-98 to -67.8%)              | 0.71                     |
|                                         |       | Oman                         | <0.1 (<0.1–0.1)              | -79.7% (-93.8 to -19.4%)            | 1 (0.7–1.3)              | -90.3% (-96.7 to -62.2%)            | 0.77                     |
|                                         |       | Qatar                        | <0.1 (<0.1–<0.1)             | 195.2% (8.4 to 463.3%)              | 0.7 (0.5–1)              | -50.2% (-83.3 to 5%)                | 0.91                     |
|                                         |       | Saudi Arabia                 | 0.7 (0.2–1.3)                | -94.2% (-99.2 to -68.2%)            | 2.1 (0.8–3.5)            | -96.5% (-99.4 to -81.2%)            | 0.58                     |
|                                         |       | Syrian Arab Republic         | 0.3 (0.2–0.6)                | -97.6% (-99.2 to -89.5%)            | 2.4 (1.3–5)              | -95.6% (-98.6 to -81.4%)            | 0.52                     |
|                                         |       | Tunisia                      | 0.1 (0.1–0.2)                | -83.7% (-94 to -56.6%)              | 1 (0.7–1.8)              | -83.8% (-94 to -57.1%)              | 0.8                      |
|                                         |       | Türkiye                      | 0.7 (0.5–1)                  | -98% (-98.9 to -94.1%)              | 1 (0.8–1.4)              | -98.3% (-99 to -95.5%)              | 0.83                     |
|                                         |       | United Arab Emirates         | 1.1 (0.5–1.7)                | -8% (-83.2 to 209.2%)               | 33.2 (8.4–54.9)          | -86% (-96.4 to -46.5%)              | 1.79                     |
|                                         |       | Yemen                        | 4.2 (1.7–8.8)                | -85.7% (-95.7 to -34.5%)            | 11.2 (5–23.3)            | -89.9% (-96.5 to -61.6%)            | 0.51                     |
|                                         |       | Afghanistan                  | 58.1 (32.9–101.7)            | -74.6% (-88.5 to -32.2%)            | 113.9 (70.5–179.3)       | -90.2% (-94.9 to -79.6%)            | 1.03                     |
|                                         |       | Sudan                        | 2.7 (1.1–5.6)                | -92.9% (-97.4 to -77.6%)            | 5.6 (2.6–12.1)           | -94.3% (-97.8 to -83.9%)            | 0.48                     |
| Brain and central nervous system cancer |       | Global                       | 8659.9 (6718–9574.5)         | 40.5% (-13.2 to 66.9%)              | 109 (84.6–120.9)         | -10.4% (-43.5 to 5.3%)              | 0.71                     |
|                                         |       | North Africa and Middle East | 716.3 (493.9–848.2)          | 71% (0.9 to 131.7%)                 | 128.3 (87.8–151.3)       | -5% (-40 to 23.4%)                  | 0.86                     |
|                                         |       | Algeria                      | 23.7 (14.3–30.2)             | 56.3% (-16.5 to 120.5%)             | 58.3 (35.3–73.9)         | -6% (-49.9 to 28.7%)                | 0.98                     |
|                                         |       | Bahrain                      | 1 (0.6–1.4)                  | 186.4% (67.5 to 302.3%)             | 73 (46.7–93.3)           | -25% (-55.8 to 6.5%)                | 0.83                     |
|                                         |       | Egypt                        | 89.1 (61.4–125.5)            | 73.5% (-5.9 to 153.7%)              | 98.8 (68.1–141.1)        | -1.8% (-40.8 to 39.9%)              | 0.83                     |
|                                         |       | Iran                         | 128.5 (67.7–153.6)           | 40.5% (-27.9 to 81.4%)              | 156.4 (82–187)           | -10.7% (-50.1 to 8.5%)              | 0.89                     |
|                                         |       | Iraq                         | 79.9 (57.7–103.2)            | 164.2% (32 to 325.9%)               | 225.6 (162.9–289)        | 15.2% (-39.2 to 79.6%)              | 1.02                     |
|                                         |       | Jordan                       | 9.7 (7–12)                   | 202.2% (91.8 to 309.7%)             | 97.8 (69.5–120.6)        | -10.2% (-43.7 to 22.2%)             | 0.91                     |
|                                         |       | Kuwait                       | 2.5 (1.7–3.1)                | 137.7% (45.9 to 204.1%)             | 66.2 (47–82.8)           | -8.6% (-44.1 to 16.6%)              | 0.65                     |
|                                         |       | Lebanon                      | 6.1 (4.3–7.9)                | 59.8% (7.6 to 118.8%)               | 117.3 (82.6–151.5)       | -9% (-38.6 to 23.8%)                | 0.79                     |
|                                         |       | Libya                        | 8.6 (6.3–11.3)               | 71.6% (16.1 to 161.2%)              | 134.4 (99.2–175.6)       | -4.6% (-32.6 to 37.1%)              | 0.63                     |
|                                         |       | Morocco                      | 19.6 (13.1–27.1)             | 56.9% (-9.5 to 134.5%)              | 55.2 (37.4–74.2)         | 2.6% (-37.2 to 47.8%)               | 1.38                     |
|                                         |       | Palestine                    | 8.9 (6.9–11)                 | 114.7% (31.2 to 200.5%)             | 232 (175.6–279.5)        | -9.1% (-39.8 to 24.2%)              | 0.82                     |
|                                         |       | Oman                         | 2.5 (1.5–3.3)                | 151.6% (26.6 to 282.6%)             | 72.6 (43.8–91.3)         | 11% (-44.4 to 65.5%)                | 0.97                     |
|                                         |       | Qatar                        | 1.7 (1.1–2.8)                | 433.1% (209 to 716.6%)              | 85.5 (61.1–128.4)        | -20.3% (-53.1 to 20.6%)             | 1.24                     |
|                                         |       | Saudi Arabia                 | 26.5 (19.2–39.8)             | 250.7% (91.7 to 558.9%)             | 79.4 (59.2–120.9)        | 32.3% (-29.6 to 148.9%)             | 0.92                     |
|                                         |       | Syrian Arab Republic         | 20.4 (14.7–27.5)             | 34.4% (-23 to 107.6%)               | 144.8 (104.7–194.1)      | -6.8% (-38.4 to 37.2%)              | 0.83                     |
|                                         |       | Tunisia                      | 5.1 (3.4–7)                  | 44.3% (-15.1 to 113.1%)             | 41.8 (27.6–57.1)         | -5.4% (-42.2 to 37.8%)              | 1.19                     |
|                                         |       | Türkiye                      | 132.9 (63.5–183.7)           | 24.5% (-34.5 to 93.9%)              | 158.3 (76.7–215.5)       | -20.4% (-55.4 to 19.1%)             | 0.77                     |
|                                         |       | United Arab Emirates         | 14.3 (8.2–21.1)              | 462% (270.9 to 714.7%)              | 151.5 (91.5–206.7)       | -10.7% (-45.3 to 30.6%)             | 0.8                      |
|                                         |       | Yemen                        | 31.6 (18.7–46.4)             | 137% (23.7 to 365.4%)               | 123.3 (74.9–181.5)       | 15.2% (-35.9 to 99.7%)              | 0.76                     |
|                                         |       | Afghanistan                  | 54.5 (29.1–96)               | 152.7% (57 to 371.2%)               | 176 (99.6–323.9)         | -5.8% (-38.6 to 56%)                | 0.81                     |
|                                         |       | Sudan                        | 48.4 (29.1–71.3)             | 70.3% (-20 to 292.9%)               | 135.8 (84.2–196.4)       | -1.5% (-48.8 to 87.4%)              | 0.69                     |
| Stroke*                                 |       | Global                       | 143232.2 (133095.8–153241.8) | 32.4% (22 to 42.2%)                 | 1768.1 (1640.6–1889.4)   | -35.2% (-40.5 to -30.5%)            | 0.76                     |
|                                         |       | North Africa and Middle East | 7946 (7060.2–8870.8)         | 43.3% (27.2 to 61.4%)               | 1826.2 (1635.3–2026.2)   | -32% (-39.1 to -23.3%)              | 1.04                     |

**Table S11** Cause- and sex-specific burden, mortality, incidence, and prevalence of neurological conditions in North Africa and Middle East countries

| Measure                   | Location                     | All Ages                  |                                     | Age-standardised         |                                     | Sex ratio<br>2019<br>F:M |
|---------------------------|------------------------------|---------------------------|-------------------------------------|--------------------------|-------------------------------------|--------------------------|
|                           |                              | Number (thousand)<br>2019 | Percent change<br>From 1990 to 2019 | Rate per 100,000<br>2019 | Percent change<br>From 1990 to 2019 |                          |
|                           |                              | Mean (95% UI)             | Mean (95% UI)                       | Mean (95% UI)            | Mean (95% UI)                       |                          |
|                           | Algeria                      | 543.9 (451–649.2)         | 47% (18.7 to 82.1%)                 | 1755.4 (1459.6–2081.9)   | -44.6% (-55 to -31.9%)              | 1.25                     |
|                           | Bahrain                      | 8 (6.7–9.7)               | 111% (71.2 to 164.3%)               | 940.9 (796.8–1146.2)     | -52.5% (-61.2 to -42.5%)            | 1.27                     |
|                           | Egypt                        | 1494 (1146.4–1946.5)      | -7.4% (-31.5 to 33.5%)              | 2138 (1636.8–2809.8)     | -35.5% (-50 to -17%)                | 1.14                     |
|                           | Iran                         | 884.8 (812.2–943.7)       | 48.2% (33.4 to 63.4%)               | 1262.2 (1153.5–1346.3)   | -45.7% (-51 to -38.3%)              | 0.98                     |
|                           | Iraq                         | 682.9 (548–826.3)         | 117.8% (72 to 174.5%)               | 2922.9 (2399–3459.1)     | -19.4% (-35.5 to -0.8%)             | 0.82                     |
|                           | Jordan                       | 86.1 (72.9–100.2)         | 133.8% (94 to 178.9%)               | 1448 (1220.4–1679.5)     | -50.2% (-58.7 to -41.1%)            | 1.17                     |
|                           | Kuwait                       | 25.5 (21.8–29.8)          | 232.8% (186.6 to 287.4%)            | 938.4 (795–1093.3)       | -11.7% (-24 to 3.3%)                | 0.68                     |
|                           | Lebanon                      | 39.2 (30.9–48.7)          | 63% (27.7 to 105.4%)                | 752.9 (593.3–935.9)      | -33.7% (-47.6 to -16%)              | 1.08                     |
|                           | Libya                        | 82.3 (64.2–104.7)         | 52.5% (15.8 to 109.4%)              | 1570.5 (1237.3–2001.2)   | -21.3% (-37.5 to 1.4%)              | 1.22                     |
|                           | Morocco                      | 666.3 (534.6–808.8)       | 72.1% (36.4 to 111.6%)              | 2257.8 (1838.8–2702.5)   | -17.2% (-33.9 to 0.9%)              | 1.06                     |
|                           | Palestine                    | 44.9 (39.5–50.8)          | 63.5% (29.3 to 104.3%)              | 2128.3 (1878.2–2399.7)   | -32.5% (-46.4 to -15%)              | 0.99                     |
|                           | Oman                         | 30.9 (27–36.7)            | 26.6% (-0.4 to 64.9%)               | 1884.3 (1667.3–2127.1)   | -38.7% (-51.9 to -20.7%)            | 0.95                     |
|                           | Qatar                        | 9 (7.3–11.1)              | 256.6% (174.3 to 355.9%)            | 904.5 (747.6–1130.3)     | -44.7% (-57.5 to -29.5%)            | 1.72                     |
|                           | Saudi Arabia                 | 417.6 (326.2–509.9)       | 129% (67.6 to 211.5%)               | 2114.9 (1685.1–2485.5)   | -29.1% (-46.4 to -5.6%)             | 1.07                     |
|                           | Syrian Arab Republic         | 238.3 (184.9–304.4)       | -5.7% (-29.3 to 27.5%)              | 2018.1 (1589.6–2547.1)   | -40.2% (-55.3 to -19.9%)            | 0.99                     |
|                           | Tunisia                      | 176.9 (135.4–225.5)       | 83.2% (38.9 to 138.2%)              | 1477.5 (1138.5–1875)     | -24.7% (-42.8 to -2%)               | 0.92                     |
|                           | Türkiye                      | 993.1 (820.9–1177.5)      | 75.3% (32.7 to 117%)                | 1162.6 (965–1380.4)      | -23.5% (-42.5 to -5.2%)             | 0.95                     |
|                           | United Arab Emirates         | 95.5 (70.9–128.9)         | 416.5% (265.8 to 618.4%)            | 1925.6 (1517–2457.9)     | -46% (-58.5 to -30.5%)              | 1.02                     |
|                           | Yemen                        | 388.5 (302.6–500.1)       | 88.5% (44 to 152.4%)                | 2765.5 (2161.6–3520.5)   | -24.5% (-41 to -1.9%)               | 1.07                     |
|                           | Afghanistan                  | 507.8 (375.9–659.8)       | 56.3% (20.5 to 98.4%)               | 3498.2 (2508.8–4500.4)   | -21.8% (-39.4 to -3.6%)             | 1.42                     |
|                           | Sudan                        | 522.4 (385.9–715.6)       | 21.5% (-7.2 to 57.4%)               | 2585.5 (1970.5–3552.9)   | -33% (-45.3 to -16.9%)              | 1.15                     |
| Ischaemic stroke          | Global                       | 63478.3 (57827.4–68986.5) | 56.7% (43.3 to 67.9%)               | 798.8 (727.5–866.9)      | -28.5% (-34.7 to -23.2%)            | 0.83                     |
|                           | North Africa and Middle East | 4751.4 (4227.7–5271.9)    | 120% (89 to 148.1%)                 | 1183.6 (1060.8–1307)     | -8.8% (-19.6 to 2.2%)               | 1.09                     |
|                           | Algeria                      | 372.7 (302.7–448.8)       | 126.7% (81.1 to 182.3%)             | 1275.1 (1052.8–1530.2)   | -24.7% (-38.7 to -8.3%)             | 1.27                     |
|                           | Bahrain                      | 4.2 (3.5–5)               | 165.2% (120.6 to 220%)              | 613.6 (521.7–746.7)      | -43.9% (-53.5 to -33%)              | 1.29                     |
|                           | Egypt                        | 863.1 (669–1115.5)        | 99% (43.1 to 170.4%)                | 1381.5 (1070.2–1804.1)   | 13.7% (-15.5 to 43.8%)              | 1.3                      |
|                           | Iran                         | 668.9 (608–717.6)         | 68.5% (51.1 to 87.3%)               | 984.4 (890–1054.7)       | -42.8% (-48.2 to -34.9%)            | 1.03                     |
|                           | Iraq                         | 373.2 (305.8–438.9)       | 153.9% (101.6 to 214.7%)            | 1828.9 (1525.3–2123.6)   | -7% (-25.1 to 13.7%)                | 0.89                     |
|                           | Jordan                       | 59.9 (50.6–69.6)          | 161.4% (114.5 to 207.5%)            | 1083.5 (911.7–1252.3)    | -46.3% (-56.1 to -36.4%)            | 1.21                     |
|                           | Kuwait                       | 15.2 (13–18)              | 252.5% (206.4 to 307%)              | 645.4 (546.5–754.4)      | -12% (-24 to 2.4%)                  | 0.74                     |
|                           | Lebanon                      | 31.1 (24.6–38.2)          | 125.1% (71.9 to 176.4%)             | 597.8 (473.3–734.3)      | -15.1% (-34.7 to 4.6%)              | 1.08                     |
|                           | Libya                        | 55.4 (43.1–71)            | 164% (105.4 to 245.1%)              | 1122.6 (875.9–1435.2)    | 11.2% (-12 to 42.4%)                | 1.24                     |
|                           | Morocco                      | 451.7 (364.1–544.5)       | 167.3% (107.4 to 225.5%)            | 1603.6 (1305–1921.7)     | 18.5% (-6.7 to 42.2%)               | 1.09                     |
|                           | Palestine                    | 31.2 (27.2–35.4)          | 101.3% (59.7 to 150.7%)             | 1590.9 (1386.2–1793.7)   | -17.8% (-34.6 to 3%)                | 1.03                     |
|                           | Oman                         | 17.3 (14.8–19.9)          | 79.5% (38.7 to 135.1%)              | 1291.3 (1116.3–1468.2)   | -18.3% (-35.2 to 6.7%)              | 0.7                      |
|                           | Qatar                        | 3.8 (3–4.6)               | 333.4% (238.6 to 427.2%)            | 577.3 (476.3–725)        | -35.5% (-49.9 to -19.3%)            | 1.79                     |
|                           | Saudi Arabia                 | 207.9 (160.1–249.4)       | 153.3% (90.1 to 234.4%)             | 1300.8 (1026.9–1516.1)   | -17.4% (-36.3 to 5.8%)              | 1.09                     |
|                           | Syrian Arab Republic         | 116.5 (92.6–145.6)        | 43.2% (7.6 to 90.1%)                | 1069.9 (858.8–1325.1)    | -25.1% (-44.7 to -2.2%)             | 1.16                     |
|                           | Tunisia                      | 128.1 (98.9–163.2)        | 178.2% (108.2 to 261.1%)            | 1090.4 (848.4–1382.7)    | 4.1% (-22 to 34.2%)                 | 0.94                     |
|                           | Türkiye                      | 551.1 (460–649.2)         | 133.2% (71.4 to 186.1%)             | 662.7 (552.9–779.5)      | -8% (-32.7 to 14.3%)                | 1.05                     |
|                           | United Arab Emirates         | 54.4 (41.4–69.8)          | 620.9% (416.4 to 889.1%)            | 1415.2 (1128.2–1749.3)   | -33.9% (-48.7 to -15.7%)            | 1.05                     |
|                           | Yemen                        | 212.2 (168.3–276.2)       | 232.1% (159.4 to 334.1%)            | 1716.7 (1370.2–2197.1)   | 19.8% (-4.2 to 51.1%)               | 1.1                      |
|                           | Afghanistan                  | 224.6 (170.4–298.1)       | 135.5% (80.7 to 197.7%)             | 1865.5 (1381.8–2444.2)   | 27.3% (-0.6 to 58.5%)               | 1.37                     |
|                           | Sudan                        | 304.2 (232.8–427)         | 108.8% (61.1 to 165.4%)             | 1692.7 (1303.5–2360.6)   | 8.1% (-12.2 to 33.5%)               | 1.18                     |
| Intracerebral haemorrhage | Global                       | 68572.5 (63272.3–73682)   | 25.3% (12.2 to 36.3%)               | 832.8 (769.2–894.7)      | -36.7% (-43.3 to -31%)              | 0.68                     |
|                           | North Africa and Middle East | 2702.2 (2343.7–3120.3)    | 3.4% (-12.3 to 21.4%)               | 548.4 (479.5–623.1)      | -51.7% (-58.2 to -43.8%)            | 0.93                     |
|                           | Algeria                      | 142.3 (112.7–177.6)       | -16.1% (-35.6 to 10.1%)             | 403.4 (322.4–501.3)      | -67.9% (-75.6 to -58.4%)            | 1.17                     |



**Table S11** Cause- and sex-specific burden, mortality, incidence, and prevalence of neurological conditions in North Africa and Middle East countries

| Measure                  | Cause | Location                     | All Ages                   |                                     | Age-standardised         |                                     | Sex ratio<br>2019<br>F:M |
|--------------------------|-------|------------------------------|----------------------------|-------------------------------------|--------------------------|-------------------------------------|--------------------------|
|                          |       |                              | Number (thousand)<br>2019  | Percent change<br>From 1990 to 2019 | Rate per 100,000<br>2019 | Percent change<br>From 1990 to 2019 |                          |
|                          |       |                              | Mean (95% UI)              | Mean (95% UI)                       | Mean (95% UI)            | Mean (95% UI)                       |                          |
|                          |       | Bahrain                      | 3 (2.4–3.7)                | 78.6% (36.6 to 133.3%)              | 264.6 (217.2–326.5)      | -64.2% (-72 to -54.2%)              | 1.28                     |
|                          |       | Egypt                        | 525.9 (380.6–714.4)        | -36.5% (-56.7 to -7.1%)             | 641.8 (460.5–884.3)      | -59.8% (-70.7 to -45.5%)            | 0.88                     |
|                          |       | Iran                         | 172.6 (162.4–183.2)        | 6.8% (-6.5 to 20.4%)                | 223.3 (209.6–236.3)      | -53.6% (-59.9 to -47.4%)            | 0.79                     |
|                          |       | Iraq                         | 287.2 (222–364.5)          | 99.7% (51.7 to 165.7%)              | 1022 (808.4–1271.1)      | -30% (-47 to -9.1%)                 | 0.7                      |
|                          |       | Jordan                       | 22.9 (19.3–27.1)           | 83.5% (47.7 to 127.3%)              | 325.6 (273.5–385.1)      | -60% (-67.8 to -50.4%)              | 1.04                     |
|                          |       | Kuwait                       | 8.4 (6.9–10)               | 252.7% (182.6 to 330.1%)            | 246 (201.3–294)          | -4.2% (-23.3 to 18%)                | 0.49                     |
|                          |       | Lebanon                      | 6.7 (5–9)                  | -19% (-40.5 to 9.9%)                | 128.4 (95.9–170.4)       | -64% (-73.7 to -51%)                | 1.02                     |
|                          |       | Libya                        | 22.6 (16.9–30.6)           | -2.1% (-28.9 to 43%)                | 376.2 (284.9–504.4)      | -51.2% (-63.2 to -34.3%)            | 1.16                     |
|                          |       | Morocco                      | 181.5 (138.9–232.6)        | 3.6% (-24.8 to 39.1%)               | 554 (425.3–704.4)        | -51% (-64.1 to -34.3%)              | 0.97                     |
|                          |       | Palestine                    | 12.2 (10.4–14.2)           | 11.2% (-14.1 to 46.7%)              | 487.3 (416.5–568.3)      | -56.7% (-66.5 to -43%)              | 0.86                     |
|                          |       | Oman                         | 10.8 (9.3–13.4)            | -1.9% (-25.1 to 32.7%)              | 504.1 (437.1–621.6)      | -59.8% (-69.5 to -46.5%)            | 1.9                      |
|                          |       | Qatar                        | 3.5 (2.7–4.6)              | 205.4% (117.4 to 322.7%)            | 243.6 (195.1–315.2)      | -56.3% (-67.8 to -41.8%)            | 1.57                     |
|                          |       | Saudi Arabia                 | 192.7 (149.1–243.1)        | 113.8% (51 to 215.6%)               | 764.7 (597–929.3)        | -41.3% (-57.6 to -15.5%)            | 1.00                     |
|                          |       | Syrian Arab Republic         | 106.5 (80.7–141.6)         | -11.4% (-36.4 to 24.2%)             | 839 (646.4–1101.7)       | -48.5% (-62.7 to -28.8%)            | 0.83                     |
|                          |       | Tunisia                      | 40.6 (29.9–53.5)           | 2.1% (-27.6 to 42.4%)               | 322.5 (238.9–422.5)      | -56.5% (-69.3 to -38.5%)            | 0.84                     |
|                          |       | Türkiye                      | 350.8 (284.1–427.5)        | 37% (0.3 to 74.7%)                  | 399 (323.7–485.6)        | -36.9% (-54.1 to -20%)              | 0.84                     |
|                          |       | United Arab Emirates         | 35 (23.8–53.1)             | 294.6% (149.3 to 494.6%)            | 449.8 (317.9–664.8)      | -64.1% (-75.4 to -49.2%)            | 0.88                     |
|                          |       | Yemen                        | 146.7 (108.2–195.4)        | 25% (-9.2 to 75.9%)                 | 884.3 (663.2–1178.9)     | -53.7% (-65.8 to -36.8%)            | 1.00                     |
|                          |       | Afghanistan                  | 241.9 (176.7–325)          | 22.9% (-7.3 to 64.9%)               | 1397.7 (991–1864.5)      | -46% (-59.2 to -29.6%)              | 1.46                     |
|                          |       | Sudan                        | 185.7 (126.4–260.2)        | -20.6% (-43.3 to 7.9%)              | 769.9 (528.1–1070.3)     | -60.6% (-70 to -48%)                | 1.1                      |
| Subarachnoid haemorrhage |       | Global                       | 11181.4 (9893.4–12668.9)   | -13.8% (-25.7 to 17%)               | 136.5 (120.8–154.7)      | -54.2% (-60.6 to -37.5%)            | 0.89                     |
|                          |       | North Africa and Middle East | 492.4 (408.3–617.2)        | -36% (-50.6 to 6.8%)                | 94.2 (79–116.8)          | -62.8% (-71.6 to -41%)              | 1.08                     |
|                          |       | Algeria                      | 28.9 (22.1–38.1)           | -19.8% (-42.2 to 28%)               | 76.8 (58.2–100.2)        | -64.6% (-74.6 to -44.4%)            | 1.21                     |
|                          |       | Bahrain                      | 0.9 (0.7–1.2)              | 55.4% (12.2 to 135.2%)              | 62.6 (48.6–85.6)         | -58.1% (-70.1 to -41.3%)            | 1.09                     |
|                          |       | Egypt                        | 104.9 (74.6–145)           | -70.2% (-82.6 to -30.8%)            | 114.7 (82.7–158)         | -77.4% (-85.6 to -52.9%)            | 0.87                     |
|                          |       | Iran                         | 43.2 (38.4–50.6)           | 12.4% (-15.5 to 70.6%)              | 54.6 (48.5–62.6)         | -55.7% (-68.1 to -31.7%)            | 1.02                     |
|                          |       | Iraq                         | 22.6 (16.9–30.6)           | -1.1% (-34.8 to 60.2%)              | 72.1 (54.4–97.2)         | -64.1% (-76.6 to -41.4%)            | 1.09                     |
|                          |       | Jordan                       | 3.3 (2.7–4.1)              | 129.6% (69.5 to 228.8%)             | 38.9 (30.6–47.5)         | -49.8% (-63.8 to -27.7%)            | 1.17                     |
|                          |       | Kuwait                       | 1.8 (1.5–2.2)              | 92.1% (52.5 to 179.1%)              | 47 (38.9–56.6)           | -34.9% (-48.1 to -11.3%)            | 1.06                     |
|                          |       | Lebanon                      | 1.4 (1–1.9)                | -27.4% (-55.8 to 16.4%)             | 26.7 (18.6–35.8)         | -64.3% (-78.7 to -41.8%)            | 1.39                     |
|                          |       | Libya                        | 4.4 (3.2–6.3)              | -56% (-73 to -4.1%)                 | 71.7 (51.6–101.4)        | -66.7% (-77.7 to -42.9%)            | 1.23                     |
|                          |       | Morocco                      | 33.2 (23–48.6)             | -23% (-47.9 to 27.2%)               | 100.3 (70.3–143.9)       | -58.6% (-72.4 to -30.7%)            | 1.22                     |
|                          |       | Palestine                    | 1.5 (1.3–1.8)              | 49.3% (10.4 to 117.4%)              | 50.1 (42.3–59)           | -46% (-61.6 to -22.2%)              | 1.32                     |
|                          |       | Oman                         | 2.7 (2.4–3)                | -25.7% (-54.9 to 55.5%)             | 88.9 (59.7–133.6)        | -62.4% (-76.8 to -29.6%)            | 1.32                     |
|                          |       | Qatar                        | 1.7 (1.2–2.2)              | 240% (109.5 to 413.8%)              | 83.6 (62.6–109.6)        | -54.2% (-72.3 to -26.8%)            | 1.7                      |
|                          |       | Saudi Arabia                 | 17 (12.3–22.5)             | 66.7% (-0.4 to 170.7%)              | 49.5 (36.1–64.1)         | -52.5% (-71.9 to -22.6%)            | 1.57                     |
|                          |       | Syrian Arab Republic         | 15.3 (11.7–19.1)           | -70.1% (-80 to -49.5%)              | 109.2 (84.6–135.2)       | -65.7% (-76 to -47.7%)              | 0.88                     |
|                          |       | Tunisia                      | 8.2 (5.8–11.2)             | -23.9% (-51.2 to 27.2%)             | 64.5 (45.6–88.2)         | -62.6% (-76.7 to -38.2%)            | 1.09                     |
|                          |       | Türkiye                      | 91.2 (72–114.2)            | 22.8% (-22 to 111.1%)               | 100.9 (80–125.8)         | -39.9% (-61.8 to 5.4%)              | 0.87                     |
|                          |       | United Arab Emirates         | 6.1 (3.4–9.8)              | 193.2% (77.1 to 409.8%)             | 60.6 (33.3–95.3)         | -64.4% (-76.8 to -43.5%)            | 1.42                     |
|                          |       | Yemen                        | 29.6 (15.7–48.4)           | 18.9% (-19.5 to 104.4%)             | 164.5 (87.2–275.6)       | -48.9% (-63.9 to -20%)              | 1.25                     |
|                          |       | Afghanistan                  | 41.4 (13.9–70.9)           | 26% (-12.4 to 98.7%)                | 235 (76.3–400.7)         | -43.8% (-59.4 to -14.3%)            | 1.61                     |
|                          |       | Sudan                        | 32.6 (18.5–55.8)           | -35.4% (-56.2 to 35.5%)             | 122.9 (71.2–208.7)       | -63.7% (-75 to -32.7%)              | 1.16                     |
| Neurological disorders†  |       | Global                       | 97724.4 (55942.8–159416.8) | 69.9% (58.7 to 90%)                 | 1253.6 (719.7–2039.8)    | -0.8% (-5.1 to 3.1%)                | 1.22                     |
|                          |       | North Africa and Middle East | 7156 (3769.7–12184.4)      | 91.1% (72 to 109.7%)                | 1382.1 (776.6–2273.8)    | -3.9% (-10.3 to 3.5%)               | 1.25                     |
|                          |       | Algeria                      | 494.8 (254.6–842.9)        | 82.8% (47.3 to 123.8%)              | 1365.1 (738.5–2292)      | -8.4% (-21.4 to 5%)                 | 1.29                     |
|                          |       | Bahrain                      | 16.1 (7.7–28.6)            | 199.3% (134.7 to 269.8%)            | 1387.6 (768.6–2266.4)    | -8% (-23.9 to 8.1%)                 | 1.26                     |



**Table S11** Cause- and sex-specific burden, mortality, incidence, and prevalence of neurological conditions in North Africa and Middle East countries

| Measure                                 | Cause | Location                     | All Ages                  |                                     | Age-standardised         |                                     | Sex ratio<br>2019<br>F:M |
|-----------------------------------------|-------|------------------------------|---------------------------|-------------------------------------|--------------------------|-------------------------------------|--------------------------|
|                                         |       |                              | Number (thousand)<br>2019 | Percent change<br>From 1990 to 2019 | Rate per 100,000<br>2019 | Percent change<br>From 1990 to 2019 |                          |
|                                         |       |                              | Mean (95% UI)             | Mean (95% UI)                       | Mean (95% UI)            | Mean (95% UI)                       |                          |
|                                         |       | Egypt                        | 1050.5 (470.2–1877.2)     | 92% (55.8 to 126.9%)                | 1336.2 (709.8–2284.8)    | 0.9% (-13.5 to 15.6%)               | 1.3                      |
|                                         |       | Iran                         | 1103.5 (584.2–1853)       | 80.4% (60.7 to 111.9%)              | 1394.2 (785.8–2300.9)    | -4.1% (-10.3 to 4.7%)               | 1.25                     |
|                                         |       | Iraq                         | 437.8 (204.7–786.4)       | 153.1% (104.7 to 201.9%)            | 1331.8 (715.6–2250.9)    | -1.7% (-14 to 12.3%)                | 1.23                     |
|                                         |       | Jordan                       | 118.1 (54.4–213.6)        | 243.5% (184.7 to 317.9%)            | 1291.8 (687.7–2194.4)    | -4.7% (-17.1 to 8.6%)               | 1.28                     |
|                                         |       | Kuwait                       | 49.3 (22.5–88.6)          | 181.9% (131.6 to 238.7%)            | 1294.9 (693.8–2173.2)    | -4.3% (-17.6 to 9.3%)               | 1.26                     |
|                                         |       | Lebanon                      | 69.8 (37–117.5)           | 93.9% (63 to 142.7%)                | 1349.3 (721.7–2279.8)    | -3.4% (-16.8 to 12.3%)              | 1.26                     |
|                                         |       | Libya                        | 84.6 (43.8–145.1)         | 95% (63.4 to 133.8%)                | 1378.2 (759.2–2303.8)    | -3% (-15.6 to 11.8%)                | 1.24                     |
|                                         |       | Morocco                      | 435.8 (225.1–747.8)       | 71.5% (46 to 110.2%)                | 1355.8 (744.6–2284.9)    | 1.9% (-12.1 to 17%)                 | 1.24                     |
|                                         |       | Palestine                    | 50.3 (24.7–87.5)          | 142.1% (92.8 to 184.1%)             | 1376 (773.8–2255.8)      | -5.1% (-17.7 to 8.1%)               | 1.2                      |
|                                         |       | Oman                         | 43.2 (18.5–79.8)          | 167.7% (114.1 to 223.1%)            | 1340.6 (758.2–2231.2)    | 1% (-12.7 to 19.5%)                 | 1.22                     |
|                                         |       | Qatar                        | 26.8 (11.4–50.2)          | 546.8% (399.9 to 684.3%)            | 1344.2 (754.1–2196)      | -2.2% (-17.2 to 16.1%)              | 1.34                     |
|                                         |       | Saudi Arabia                 | 410.5 (195.2–722.1)       | 160.3% (106.3 to 223.5%)            | 1428.4 (794.9–2355.6)    | 0.1% (-16.7 to 20.3%)               | 1.18                     |
|                                         |       | Syrian Arab Republic         | 165.3 (80.7–293.6)        | 43.5% (20.1 to 79.2%)               | 1327.1 (692.4–2305.8)    | 1.4% (-11.9 to 16.8%)               | 1.29                     |
|                                         |       | Tunisia                      | 154.4 (80.2–263.2)        | 74.3% (47.6 to 117.8%)              | 1332.6 (699.8–2234.9)    | -2.1% (-15.5 to 11.4%)              | 1.26                     |
|                                         |       | Türkiye                      | 1232 (709.1–2000.5)       | 49.8% (23 to 84.9%)                 | 1477.4 (862.5–2368.4)    | -8.7% (-22.9 to 6.2%)               | 1.25                     |
|                                         |       | United Arab Emirates         | 104.9 (51.5–182.4)        | 439.5% (320.2 to 578.7%)            | 1432 (843.2–2254.4)      | -6.4% (-24.3 to 12%)                | 1.14                     |
|                                         |       | Yemen                        | 298.4 (137.8–541.5)       | 137.1% (81.9 to 190.8%)             | 1324.5 (723.4–2244.2)    | -2.7% (-15.4 to 12.6%)              | 1.24                     |
|                                         |       | Afghanistan                  | 382.7 (190.2–668.3)       | 154.8% (86.6 to 226.8%)             | 1503 (853.8–2492.1)      | -10.1% (-23.8 to 4.4%)              | 1.25                     |
|                                         |       | Sudan                        | 420.3 (204.7–745.9)       | 84.3% (37.5 to 130.9%)              | 1353.8 (761.5–2268.2)    | -7.1% (-20.6 to 6.3%)               | 1.2                      |
| Alzheimer's disease and other dementias |       | Global                       | 25277 (11204.5–54558.2)   | 161.6% (149.7 to 175.7%)            | 338.6 (151–731.3)        | 3.7% (-0.3 to 8.1%)                 | 1.19                     |
|                                         |       | North Africa and Middle East | 1208.1 (532–2672.8)       | 177.3% (161.1 to 215.8%)            | 387 (172–848.5)          | -1.1% (-6.6 to 12.1%)               | 1.12                     |
|                                         |       | Algeria                      | 95.6 (41.6–217.3)         | 228.9% (176.4 to 291.6%)            | 401.3 (176.1–912.8)      | -5% (-17.6 to 8.7%)                 | 1.12                     |
|                                         |       | Bahrain                      | 1.7 (0.7–3.9)             | 398.1% (321.9 to 486.1%)            | 403.1 (176.2–888.6)      | -3.8% (-15 to 9.1%)                 | 1.13                     |
|                                         |       | Egypt                        | 135.6 (59.5–305.5)        | 112.3% (83 to 155.6%)               | 362.4 (160.1–793.2)      | 0.2% (-12.4 to 18.8%)               | 1.14                     |
|                                         |       | Iran                         | 228.1 (100.8–497.8)       | 314.3% (277 to 401.2%)              | 386 (170.3–844)          | 0% (-5.4 to 21.3%)                  | 1.11                     |
|                                         |       | Iraq                         | 57.5 (25.2–128.2)         | 157.1% (125 to 195.1%)              | 382 (168.2–826.8)        | 1.9% (-9.7 to 16.3%)                | 1.08                     |
|                                         |       | Jordan                       | 14.8 (6.6–32.9)           | 385.3% (325.6 to 465.5%)            | 369.7 (165.2–822.8)      | -4.5% (-15.9 to 11.3%)              | 1.12                     |
|                                         |       | Kuwait                       | 6.9 (3.1–14.7)            | 387.2% (341.5 to 440%)              | 387.3 (174–837.8)        | -2.6% (-11.2 to 6.9%)               | 1.1                      |
|                                         |       | Lebanon                      | 19.7 (8.6–43.4)           | 208.8% (166.4 to 308.3%)            | 395.6 (172.4–866.4)      | -2.3% (-15 to 29.1%)                | 1.16                     |
|                                         |       | Libya                        | 16.6 (7.1–37.2)           | 161.3% (122.6 to 212.3%)            | 414.3 (176.1–925.9)      | -4.2% (-18.1 to 14.3%)              | 1.11                     |
|                                         |       | Morocco                      | 86.2 (37.1–195.5)         | 147% (117.2 to 177.1%)              | 385.8 (166–876.4)        | 0.3% (-10.6 to 11%)                 | 1.04                     |
|                                         |       | Palestine                    | 5.8 (2.5–13.5)            | 117.2% (87 to 155.6%)               | 388 (170.4–895.9)        | -4.4% (-17 to 12%)                  | 1.05                     |
|                                         |       | Oman                         | 3.3 (1.4–7.8)             | 126.2% (93.7 to 183.8%)             | 422 (179.8–967.9)        | -3.3% (-16.4 to 26.2%)              | 1.13                     |
|                                         |       | Qatar                        | 1.2 (0.5–2.9)             | 600% (460.9 to 778.2%)              | 407.2 (171.7–948.7)      | 3.4% (-11.6 to 19.9%)               | 1.13                     |
|                                         |       | Saudi Arabia                 | 32.5 (13.9–73)            | 122.7% (86.3 to 186.1%)             | 389.7 (168.5–863.1)      | -2% (-15.8 to 26.4%)                | 1.1                      |
|                                         |       | Syrian Arab Republic         | 30.7 (13.2–70.3)          | 112% (74.2 to 170.1%)               | 391.1 (167–907.7)        | 2.9% (-14 to 29.8%)                 | 1.14                     |
|                                         |       | Tunisia                      | 42 (18.3–95)              | 212.4% (160 to 293.7%)              | 400.1 (174.9–889.4)      | -2% (-17 to 21.4%)                  | 1.1                      |
|                                         |       | Türkiye                      | 313.7 (142.3–713.2)       | 182.1% (142.9 to 226.4%)            | 395.4 (179.6–892.7)      | -2% (-15.1 to 12.9%)                | 1.17                     |
|                                         |       | United Arab Emirates         | 4.1 (1.6–10)              | 607.7% (462.1 to 810.2%)            | 366.1 (157.8–831)        | -5.4% (-17.1 to 14.2%)              | 1.08                     |
|                                         |       | Yemen                        | 31.8 (13.7–72)            | 202% (163.7 to 252.4%)              | 383.7 (166–893.1)        | -0.4% (-11.5 to 14.1%)              | 1.07                     |
|                                         |       | Afghanistan                  | 30.9 (12.7–73.8)          | 52.6% (31.4 to 71.9%)               | 432.7 (179–1002)         | -3.7% (-15.3 to 6.8%)               | 1.05                     |
|                                         |       | Sudan                        | 48.1 (21.1–107.8)         | 107.9% (88.1 to 135.5%)             | 365.5 (160.3–840.7)      | -3.9% (-12.2 to 7%)                 | 1.08                     |
| Parkinson's disease                     |       | Global                       | 6292.6 (5769.2–6827.2)    | 128.9% (113.3 to 142.5%)            | 80 (73.3–86.6)           | 2.4% (-4.4 to 8.2%)                 | 0.56                     |
|                                         |       | North Africa and Middle East | 300.7 (266.3–365.4)       | 163.8% (134.8 to 202.1%)            | 84.4 (74.7–103.2)        | 0.9% (-10.2 to 15.7%)               | 0.68                     |
|                                         |       | Algeria                      | 21.7 (17.6–26.3)          | 161.4% (106 to 229.3%)              | 78.9 (64.1–95.1)         | -18.1% (-35.7 to 3.6%)              | 0.83                     |
|                                         |       | Bahrain                      | 0.5 (0.3–0.6)             | 299.2% (213.3 to 401.9%)            | 88.5 (64.1–106.6)        | -13.5% (-32.1 to 7.5%)              | 0.69                     |
|                                         |       | Egypt                        | 48.3 (37.8–67.9)          | 135.2% (88.1 to 190.9%)             | 98.6 (77.1–142.4)        | 11.7% (-9.4 to 36.5%)               | 1.05                     |

**Table S11** Cause- and sex-specific burden, mortality, incidence, and prevalence of neurological conditions in North Africa and Middle East countries

| Measure             |                              | All Ages                 |                           | Age-standardised    |                          | Sex ratio |
|---------------------|------------------------------|--------------------------|---------------------------|---------------------|--------------------------|-----------|
|                     |                              | Number (thousand)        | Percent change            | Rate per 100,000    | Percent change           |           |
|                     |                              | 2019                     | From 1990 to 2019         | 2019                | From 1990 to 2019        |           |
| Cause               | Location                     | Mean (95% UI)            | Mean (95% UI)             | Mean (95% UI)       | Mean (95% UI)            | F:M       |
|                     | Iran                         | 48.8 (42.4–53.9)         | 253.3% (207.9 to 313.5%)  | 76.8 (66.9–84.9)    | 3.1% (-12.9 to 20.5%)    | 0.68      |
|                     | Iraq                         | 15 (12.2–20.3)           | 209.1% (147.3 to 290.7%)  | 85.6 (71–115.2)     | 17.5% (-5.7 to 47.1%)    | 0.43      |
|                     | Jordan                       | 3.5 (3–4.1)              | 335.8% (254.4 to 432.2%)  | 74.2 (63–86.7)      | -14% (-29.8 to 5%)       | 0.69      |
|                     | Kuwait                       | 1.1 (0.9–1.3)            | 221% (180.8 to 271.8%)    | 56.1 (47.2–66)      | -26.8% (-36.5 to -14.7%) | 0.48      |
|                     | Lebanon                      | 3.7 (3–4.8)              | 142.1% (82.7 to 213.3%)   | 69.5 (57.3–91.6)    | -14.2% (-35.2 to 11.2%)  | 0.58      |
|                     | Libya                        | 3.7 (2.8–4.7)            | 206.8% (134.1 to 306.4%)  | 84.8 (65.3–108.4)   | 10.9% (-15.2 to 45.8%)   | 0.69      |
|                     | Morocco                      | 25.3 (20.6–29.6)         | 221.2% (160.6 to 300.2%)  | 96.6 (79.3–111.9)   | 39.6% (14.4 to 73.3%)    | 0.59      |
|                     | Palestine                    | 1.6 (1.1–1.9)            | 127.5% (75.6 to 210.6%)   | 93.1 (64.9–106.8)   | -4.9% (-26.4 to 29.1%)   | 0.56      |
|                     | Oman                         | 1.1 (0.8–1.3)            | 168.6% (99.7 to 253.4%)   | 125.3 (79–144.5)    | 30.3% (-2.2 to 70.4%)    | 0.52      |
|                     | Qatar                        | 0.5 (0.4–0.6)            | 517% (361.6 to 711.4%)    | 148.6 (96–194.6)    | 14.8% (-11.6 to 49.8%)   | 1.03      |
|                     | Saudi Arabia                 | 11.6 (9.4–13.5)          | 145.8% (88.1 to 247.9%)   | 111 (83.8–129.8)    | 1.6% (-19.9 to 43.5%)    | 0.4       |
|                     | Syrian Arab Republic         | 7.8 (5.5–9.8)            | 157.5% (96.9 to 243.4%)   | 83.9 (58.4–104.9)   | 13.7% (-12.2 to 49.7%)   | 0.67      |
|                     | Tunisia                      | 8.3 (6.4–10.7)           | 205.8% (138.1 to 290.2%)  | 72.7 (56.2–93.7)    | 11.1% (-13.8 to 41%)     | 0.58      |
|                     | Türkiye                      | 62.2 (48.7–105.2)        | 147.6% (97.6 to 201.9%)   | 76.1 (59.4–129.7)   | -8.2% (-25.9 to 11.9%)   | 0.67      |
|                     | United Arab Emirates         | 2.9 (2.1–3.9)            | 716.5% (504.6 to 1058.9%) | 130.5 (87–167.2)    | -10.6% (-29.6 to 21.4%)  | 0.61      |
|                     | Yemen                        | 8.2 (6.4–10.7)           | 216.7% (147.7 to 319.7%)  | 76.8 (60.8–98.7)    | 15.5% (-7.8 to 49.7%)    | 0.66      |
|                     | Afghanistan                  | 11.6 (8.8–14.9)          | 52.5% (18.5 to 92.8%)     | 113.8 (88.7–143.3)  | -6% (-25.7 to 16.3%)     | 0.74      |
|                     | Sudan                        | 13.2 (10.4–16.8)         | 81.9% (38.4 to 143.1%)    | 85.5 (67.8–107.5)   | -4.3% (-26.5 to 26.1%)   | 0.58      |
| Idiopathic epilepsy | Global                       | 13077.6 (9986.7–16734.1) | 15.9% (0 to 42.1%)        | 170.6 (130.4–218.3) | -16.5% (-27.4 to 1.7%)   | 0.82      |
|                     | North Africa and Middle East | 955.3 (682.8–1293.2)     | 13.8% (-13.8 to 56%)      | 158.3 (112.6–213.2) | -26.2% (-43.6 to -1.1%)  | 0.87      |
|                     | Algeria                      | 60.5 (29.8–101.8)        | -8.6% (-58.6 to 82.6%)    | 146.2 (70.8–246.9)  | -38% (-72.5 to 25.8%)    | 0.96      |
|                     | Bahrain                      | 2.3 (1.1–4.1)            | 83.1% (-17.9 to 303.1%)   | 186.8 (86.8–326.3)  | -31.7% (-70 to 51.3%)    | 0.94      |
|                     | Egypt                        | 111.7 (44.2–202.5)       | 34.2% (-51.1 to 227.5%)   | 110.6 (43.3–200)    | -19.5% (-70.4 to 99.5%)  | 0.74      |
|                     | Iran                         | 113.3 (78.4–155.6)       | -22.8% (-43.4 to 6.4%)    | 140.2 (96.1–192.5)  | -34.8% (-51.4 to -13%)   | 0.84      |
|                     | Iraq                         | 56.3 (24.8–98.7)         | 59.3% (-31.4 to 252.4%)   | 131 (57.8–229.5)    | -29.4% (-69.3 to 55.2%)  | 0.93      |
|                     | Jordan                       | 14.1 (6.2–26.7)          | 131.8% (-9.3 to 452%)     | 119.4 (51.7–224.9)  | -22.1% (-69.1 to 83.1%)  | 0.89      |
|                     | Kuwait                       | 5.5 (2.4–10.5)           | 74.2% (-22.8 to 296.6%)   | 138.9 (58.5–268.6)  | -22.2% (-66.5 to 81.8%)  | 0.9       |
|                     | Lebanon                      | 6.8 (3.2–12.3)           | 11.9% (-52 to 153.2%)     | 132.9 (62.6–243.4)  | -25.6% (-67.3 to 68.6%)  | 0.84      |
|                     | Libya                        | 9.3 (5.2–14.9)           | 1.9% (-46.8 to 108.6%)    | 141 (77.2–226.1)    | -29% (-63.5 to 47.3%)    | 0.86      |
|                     | Morocco                      | 47.9 (17.3–89.9)         | 17.6% (-58.2 to 176.2%)   | 135.2 (48.7–253.5)  | -11.7% (-68.2 to 108.6%) | 1.07      |
|                     | Palestine                    | 8.2 (4.5–13.3)           | 69.8% (-11.5 to 223.1%)   | 163.6 (91.1–262.6)  | -24.2% (-60.6 to 43.1%)  | 0.85      |
|                     | Oman                         | 4.5 (1.6–9)              | 91.1% (-38.5 to 468.1%)   | 107.8 (37.2–214.7)  | -9.8% (-70.4 to 160.3%)  | 0.87      |
|                     | Qatar                        | 3.1 (1.2–6.1)            | 326.2% (61.4 to 1037%)    | 126.5 (47.7–250.5)  | -28.2% (-73.2 to 94.6%)  | 1.1       |
|                     | Saudi Arabia                 | 81.4 (40.2–138)          | 128.5% (4.1 to 416.5%)    | 226.7 (107.8–394.2) | -0.3% (-56.7 to 123.2%)  | 1.06      |
|                     | Syrian Arab Republic         | 15.9 (6.8–28.7)          | -10.5% (-65.7 to 124.2%)  | 109.2 (47–198.2)    | -17.2% (-67.5 to 102.6%) | 0.89      |
|                     | Tunisia                      | 13.3 (6.6–23.5)          | -11.9% (-58.9 to 78.9%)   | 119.5 (58.8–210.4)  | -26.5% (-66.1 to 50.4%)  | 0.89      |
|                     | Türkiye                      | 163 (83.7–270.9)         | -19.8% (-60.9 to 58.6%)   | 213.7 (113.7–354.5) | -30.4% (-65.1 to 38.4%)  | 0.78      |
|                     | United Arab Emirates         | 18.9 (9–30.7)            | 253.5% (60.3 to 637%)     | 216.3 (98.8–364.2)  | -28.2% (-69.6 to 62.2%)  | 0.79      |
|                     | Yemen                        | 49.5 (26.5–81.7)         | 41.5% (-27.2 to 217.2%)   | 147.6 (78.5–243.3)  | -27.4% (-62.7 to 53%)    | 0.89      |
|                     | Afghanistan                  | 94 (50.2–142.6)          | 88% (10.5 to 308.6%)      | 224.7 (120.4–348.1) | -38.8% (-64.2 to 28.3%)  | 1.13      |
|                     | Sudan                        | 74.7 (43.3–119.5)        | 5.7% (-46.7 to 158.2%)    | 168.7 (97.5–271)    | -37.1% (-67.9 to 39.6%)  | 0.82      |
| Multiple sclerosis  | Global                       | 1159.8 (1001.2–1381.9)   | 59.7% (46.6 to 72.7%)     | 14 (12–16.6)        | -13.2% (-20.9 to -6.3%)  | 1.57      |
|                     | North Africa and Middle East | 115.9 (93.1–144.8)       | 146% (98.9 to 205.5%)     | 19.9 (16.1–24.7)    | 6.2% (-11.6 to 30.5%)    | 1.58      |
|                     | Algeria                      | 8.5 (5.7–11.2)           | 178.8% (106.5 to 257.5%)  | 20.1 (13.6–26.4)    | 12.2% (-14.2 to 41.1%)   | 1.73      |
|                     | Bahrain                      | 0.2 (0.2–0.3)            | 446% (337.3 to 558%)      | 12.5 (9.1–16.2)     | 12.3% (-7.6 to 32.6%)    | 1.8       |
|                     | Egypt                        | 14.3 (8.6–35.9)          | 95.5% (-16.2 to 400.6%)   | 15.3 (9.6–32.4)     | 6.4% (-44.2 to 137.3%)   | 1.55      |
|                     | Iran                         | 26.9 (21.8–34.9)         | 143.4% (103.1 to 191.7%)  | 29.2 (23.7–37.4)    | 0.5% (-18.6 to 20.3%)    | 1.44      |

**Table S11** Cause- and sex-specific burden, mortality, incidence, and prevalence of neurological conditions in North Africa and Middle East countries

| Measure               |                              | All Ages                  |                                     | Age-standardised         |                                     | Sex ratio |
|-----------------------|------------------------------|---------------------------|-------------------------------------|--------------------------|-------------------------------------|-----------|
|                       |                              | Number (thousand)<br>2019 | Percent change<br>From 1990 to 2019 | Rate per 100,000<br>2019 | Percent change<br>From 1990 to 2019 |           |
| Cause                 | Location                     | Mean (95% UI)             | Mean (95% UI)                       | Mean (95% UI)            | Mean (95% UI)                       | F:M       |
|                       | Iraq                         | 4.9 (3.6–6.5)             | 254% (186.9 to 340.3%)              | 14.3 (10.6–18.6)         | 12.4% (-8.4 to 39.2%)               | 1.57      |
|                       | Jordan                       | 1.9 (1.4–2.4)             | 325% (236.9 to 413%)                | 19 (13.6–23.9)           | -6.9% (-24.9 to 11.7%)              | 1.86      |
|                       | Kuwait                       | 0.9 (0.6–1.2)             | 414.3% (336.1 to 505.8%)            | 17.3 (12.8–22.6)         | 38.2% (21.1 to 58.7%)               | 1.5       |
|                       | Lebanon                      | 1.3 (0.9–1.6)             | 146.5% (97.3 to 209.4%)             | 23.5 (16.4–30.3)         | 20.9% (-2.5 to 51.3%)               | 1.58      |
|                       | Libya                        | 1.6 (1.1–2.2)             | 265% (176.8 to 418.4%)              | 21.8 (14.9–30.2)         | 34.2% (2.3 to 87.9%)                | 1.5       |
|                       | Morocco                      | 7.4 (5.2–10)              | 148.6% (94.9 to 227.4%)             | 20.2 (14.1–27)           | 25.1% (-1.6 to 63.3%)               | 1.69      |
|                       | Palestine                    | 0.7 (0.6–0.9)             | 239.9% (151.8 to 357.1%)            | 19.5 (15.3–24.3)         | 8.5% (-18.1 to 44.4%)               | 1.32      |
|                       | Oman                         | 0.7 (0.5–1)               | 301.1% (176.6 to 453.3%)            | 17.1 (11.6–23.2)         | 20.3% (-15.8 to 68.5%)              | 1.47      |
|                       | Qatar                        | 0.5 (0.4–0.7)             | 1040.4% (822.7 to 1331.2%)          | 16.8 (12.3–21.8)         | 33.7% (10.4 to 61.8%)               | 2.31      |
|                       | Saudi Arabia                 | 4.6 (3.3–6)               | 357.9% (248.8 to 567.7%)            | 11.7 (8.7–15)            | 23% (-5 to 77%)                     | 1.63      |
|                       | Syrian Arab Republic         | 2.2 (1.6–2.8)             | 118.3% (77.3 to 168.1%)             | 15.2 (11.3–19.6)         | 15.4% (-5.9 to 40.2%)               | 1.75      |
|                       | Tunisia                      | 2.9 (2.1–3.9)             | 158.7% (103.5 to 228.3%)            | 22.2 (15.5–29.2)         | 25.6% (1 to 58.9%)                  | 1.65      |
|                       | Türkiye                      | 19.4 (15.3–24.6)          | 68.9% (7 to 127.5%)                 | 21 (16.3–27.6)           | -11.8% (-37.6 to 20%)               | 1.66      |
|                       | United Arab Emirates         | 2.8 (1.7–4.4)             | 935.7% (601.3 to 1345.8%)           | 20.6 (12.3–32.5)         | 19% (-16.5 to 59.7%)                | 1.22      |
|                       | Yemen                        | 3.1 (2.4–5)               | 266.8% (156.3 to 435.7%)            | 14.1 (9.2–19.6)          | 26.4% (-9.6 to 72.1%)               | 1.35      |
|                       | Afghanistan                  | 6.6 (3.9–12.4)            | 237.7% (138 to 395.7%)              | 27.1 (16.8–48.7)         | 10.9% (-21.5 to 51.8%)              | 1.86      |
|                       | Sudan                        | 4.2 (2.6–6)               | 175.8% (93.2 to 310.7%)             | 14 (8.9–19.2)            | 20.2% (-13.9 to 70.1%)              | 1.35      |
| Migraine              | Global                       | 42077.7 (6418.4–95645.2)  | 56.6% (52.6 to 62.1%)               | 525.5 (78.8–1194)        | 1.5% (-4.4 to 3.3%)                 | 1.70      |
|                       | North Africa and Middle East | 3793.2 (645.3–8665.8)     | 102.1% (93.2 to 125.1%)             | 601.4 (107–1371.8)       | 0% (-1.6 to 1.6%)                   | 1.70      |
|                       | Algeria                      | 260 (44.3–590)            | 89% (76.7 to 120.2%)                | 602.5 (103.9–1372.1)     | -0.2% (-3.2 to 3.1%)                | 1.67      |
|                       | Bahrain                      | 9.5 (1.8–21.2)            | 219.3% (197 to 279.3%)              | 564.5 (100.5–1278.1)     | -0.7% (-3.9 to 2.8%)                | 1.66      |
|                       | Egypt                        | 619.6 (96.7–1426.4)       | 98.2% (84.3 to 113.8%)              | 621.1 (104–1420.2)       | 1.9% (-5.1 to 9.1%)                 | 1.74      |
|                       | Iran                         | 571.7 (107–1282.2)        | 77.6% (63.7 to 117.4%)              | 628.3 (115.2–1411.2)     | -0.3% (-3.6 to 4.1%)                | 1.66      |
|                       | Iraq                         | 253.2 (40.1–580.5)        | 181.6% (170.8 to 206.2%)            | 595.4 (102.8–1355.6)     | 0.3% (-2.8 to 3.2%)                 | 1.67      |
|                       | Jordan                       | 70.1 (11.9–160.3)         | 250.2% (230.2 to 298.6%)            | 590.3 (104–1339.1)       | -0.8% (-4 to 2.5%)                  | 1.66      |
|                       | Kuwait                       | 29.8 (5.2–67.4)           | 190.2% (171.1 to 225.4%)            | 578.3 (99.7–1315.1)      | 3.2% (-2.3 to 8.6%)                 | 1.68      |
|                       | Lebanon                      | 32 (5.6–73.1)             | 76.4% (68.2 to 92.7%)               | 605.8 (104–1385.5)       | 0.5% (-2.7 to 3.5%)                 | 1.67      |
|                       | Libya                        | 44.9 (7.7–101.7)          | 103.6% (88.6 to 141.3%)             | 594.7 (104–1347)         | 1.3% (-1.9 to 4.4%)                 | 1.67      |
|                       | Morocco                      | 226.8 (38.7–515.5)        | 58.5% (50.7 to 80.5%)               | 601.7 (104.2–1370.5)     | -0.3% (-3.3 to 3%)                  | 1.66      |
|                       | Palestine                    | 28.5 (4.4–66.3)           | 177.7% (166.5 to 199.2%)            | 596.1 (102.5–1357.3)     | -1.1% (-4.1 to 1.9%)                | 1.68      |
|                       | Oman                         | 28.4 (4.9–64.4)           | 185% (166.5 to 226.5%)              | 554.2 (98.7–1256.8)      | -1.4% (-4.5 to 1.9%)                | 1.67      |
|                       | Qatar                        | 18.1 (3.2–40.5)           | 601.2% (567.3 to 669.2%)            | 523 (94.3–1174.9)        | -2.7% (-6.2 to 0.8%)                | 1.66      |
|                       | Saudi Arabia                 | 234.2 (41.4–528.2)        | 176.4% (152.8 to 229.1%)            | 562 (99.4–1276.9)        | -1.2% (-5.9 to 3.8%)                | 1.55      |
|                       | Syrian Arab Republic         | 91.6 (15.5–212.2)         | 39.1% (31.2 to 62.3%)               | 609.9 (105.1–1394.5)     | 1.7% (-1.9 to 5.2%)                 | 1.68      |
|                       | Tunisia                      | 74.3 (13.2–168.6)         | 54.9% (45.1 to 82.1%)               | 606.3 (104.4–1382.7)     | 0.3% (-2.6 to 3.4%)                 | 1.67      |
|                       | Türkiye                      | 528.1 (101.8–1197.4)      | 56.6% (45.4 to 81.9%)               | 589.6 (110.2–1340.7)     | 0.2% (-4.5 to 5.2%)                 | 1.88      |
| United Arab Emirates  | 60.2 (12–134)                | 473% (424 to 588.1%)      | 535.6 (97.8–1203.7)                 | -0.7% (-4.3 to 3.1%)     | 1.66                                |           |
| Yemen                 | 175.4 (26.6–404.4)           | 169% (158.9 to 186.6%)    | 596.7 (104.2–1356.8)                | 0.1% (-2.9 to 3.2%)      | 1.65                                |           |
| Afghanistan           | 198.8 (30.2–469.5)           | 244.1% (220.3 to 261.8%)  | 587.4 (103–1342.7)                  | -1.3% (-4.9 to 3.2%)     | 1.67                                |           |
| Sudan                 | 234.3 (36.7–542)             | 122.2% (114.9 to 132.9%)  | 601.9 (104.6–1369.5)                | -0.1% (-3.2 to 3.2%)     | 1.67                                |           |
| Tension-type headache | Global                       | 4541.7 (1395.5–14981.3)   | 57.8% (45.1 to 65.9%)               | 56.2 (17–188.5)          | -2.5% (-5.4 to 1.1%)                | 1.25      |
|                       | North Africa and Middle East | 416.6 (138.3–1196.8)      | 115.5% (84.9 to 132.3%)             | 68.1 (22.8–195.5)        | 1% (-9.5 to 8.7%)                   | 1.28      |
|                       | Algeria                      | 28.5 (9.6–79.5)           | 106.7% (73.1 to 140.3%)             | 66.7 (22.6–189)          | 0.3% (-10.2 to 7.9%)                | 1.29      |
|                       | Bahrain                      | 1.1 (0.4–3.1)             | 254.2% (197.7 to 330.7%)            | 64.6 (21.3–189.3)        | -0.3% (-10.7 to 7.7%)               | 1.29      |
|                       | Egypt                        | 65.2 (21–196.7)           | 100.8% (75 to 120.6%)               | 69.1 (22.6–207.8)        | 1.4% (-10.1 to 10.8%)               | 1.29      |
|                       | Iran                         | 70.2 (23–207.1)           | 103.8% (70.9 to 131.5%)             | 77.6 (24.9–236.4)        | 5.2% (-5.7 to 15.9%)                | 1.14      |
|                       | Iraq                         | 26.3 (8.7–77)             | 193.4% (151.1 to 230.5%)            | 66.2 (22.1–190.3)        | 0.7% (-11.1 to 9.1%)                | 1.29      |

**Table S11** Cause- and sex-specific burden, mortality, incidence, and prevalence of neurological conditions in North Africa and Middle East countries

| Measure                      |                              | All Ages               |                          | Age-standardised  |                          | Sex ratio<br>2019 |
|------------------------------|------------------------------|------------------------|--------------------------|-------------------|--------------------------|-------------------|
|                              |                              | Number (thousand)      | Percent change           | Rate per 100,000  | Percent change           |                   |
|                              |                              | 2019                   | From 1990 to 2019        | 2019              | From 1990 to 2019        |                   |
| Cause                        | Location                     | Mean (95% UI)          | Mean (95% UI)            | Mean (95% UI)     | Mean (95% UI)            | F:M               |
|                              | Jordan                       | 7.4 (2.5–21.8)         | 276.6% (221.8 to 332.8%) | 66.2 (22.7–191.4) | 0.1% (-10.9 to 8.3%)     | 1.29              |
|                              | Kuwait                       | 3.2 (1.1–9)            | 204.5% (159.1 to 260.4%) | 62.8 (20.8–186.4) | 1.5% (-10.4 to 11.9%)    | 1.4               |
|                              | Lebanon                      | 3.6 (1.2–10)           | 86.4% (59 to 108.4%)     | 67 (22.7–191.7)   | 0.8% (-10.8 to 9.4%)     | 1.29              |
|                              | Libya                        | 4.9 (1.7–13.9)         | 122.3% (84.9 to 164.2%)  | 66.4 (22.8–191)   | 1.1% (-11.2 to 9.5%)     | 1.29              |
|                              | Morocco                      | 24.8 (8.5–69.4)        | 70.5% (47.5 to 93.4%)    | 66.5 (22.7–187.3) | 0.2% (-9.8 to 8.1%)      | 1.29              |
|                              | Palestine                    | 2.9 (1–8.6)            | 187.4% (144.1 to 219.3%) | 66.2 (22.1–187.5) | -0.3% (-13 to 9.3%)      | 1.3               |
|                              | Oman                         | 3.2 (1–9)              | 208.1% (154.1 to 256.4%) | 64.3 (21.6–190.1) | 0% (-15.4 to 10.8%)      | 1.29              |
|                              | Qatar                        | 2.1 (0.7–6)            | 643.8% (552 to 739.5%)   | 62 (20.7–184.7)   | -1.4% (-11.6 to 7.2%)    | 1.29              |
|                              | Saudi Arabia                 | 25.6 (9.1–70.1)        | 202% (136.9 to 255%)     | 63 (22–180.3)     | -0.3% (-18.6 to 10.8%)   | 1.3               |
|                              | Syrian Arab Republic         | 9.8 (3.4–28.4)         | 51.2% (24.9 to 78.8%)    | 67 (22.9–189.7)   | 1.1% (-10.5 to 9.5%)     | 1.29              |
|                              | Tunisia                      | 8.4 (2.9–23.5)         | 70.6% (42.7 to 97.2%)    | 67 (22.6–192.5)   | 0.7% (-10.7 to 8.5%)     | 1.3               |
|                              | Türkiye                      | 60.7 (21.7–160.1)      | 71.5% (44.9 to 93.8%)    | 66.6 (23.6–180)   | 0.8% (-10 to 10.1%)      | 1.36              |
|                              | United Arab Emirates         | 7.4 (2.4–20.5)         | 542.2% (427.1 to 676.1%) | 63.2 (20.7–187.8) | 0% (-12.6 to 8.9%)       | 1.29              |
|                              | Yemen                        | 17.6 (5.8–51.7)        | 176.7% (140 to 209.4%)   | 66.1 (22.8–185.6) | 0.6% (-11.1 to 9.8%)     | 1.28              |
|                              | Afghanistan                  | 19.6 (6.3–57.7)        | 231.4% (191.2 to 263.2%) | 65.2 (22.1–183.3) | -0.1% (-9.6 to 7.9%)     | 1.29              |
|                              | Sudan                        | 23.6 (7.8–69.1)        | 125% (95.3 to 148.4%)    | 66.4 (23.2–189)   | 0.5% (-11.8 to 9.8%)     | 1.29              |
| Motor neuron disease         | Global                       | 1034.6 (979.9–1085.4)  | 65.7% (55.5 to 77.7%)    | 12.7 (12–13.3)    | -4.5% (-10.1 to 1.9%)    | 0.71              |
|                              | North Africa and Middle East | 41.6 (33.8–50.6)       | 22.5% (-28.9 to 88.7%)   | 7.8 (6.4–9.5)     | -16.6% (-44.8 to 17.9%)  | 0.73              |
|                              | Algeria                      | 1 (0.8–1.3)            | 115.9% (60.6 to 191.1%)  | 2.5 (2–3.2)       | -2% (-28.3 to 36.3%)     | 1.15              |
|                              | Bahrain                      | <0.1 (<0.1–<0.1)       | 114.5% (70.4 to 169.7%)  | 2.1 (1.7–2.5)     | -54.1% (-64.1 to -42.6%) | 1.12              |
|                              | Egypt                        | 6.5 (3.8–10.1)         | 221.4% (80.1 to 420.3%)  | 7.9 (4.6–12.4)    | 69.4% (-4.4 to 176.8%)   | 0.68              |
|                              | Iran                         | 3.8 (3.4–4.4)          | 170.1% (88.7 to 257.6%)  | 4.7 (4.1–5.4)     | 43.7% (1 to 90.3%)       | 0.9               |
|                              | Iraq                         | 0.6 (0.5–0.8)          | 188% (107.4 to 289.5%)   | 1.8 (1.4–2.3)     | 10.6% (-27 to 58.4%)     | 1.1               |
|                              | Jordan                       | 0.3 (0.3–0.4)          | 424.1% (275.5 to 637.8%) | 3.2 (2.5–4.2)     | 35.8% (-4.5 to 97%)      | 0.53              |
|                              | Kuwait                       | 0.2 (0.2–0.3)          | -14% (-39.2 to 17.5%)    | 5.9 (4.3–7.5)     | -61.7% (-72.5 to -48.2%) | 0.37              |
|                              | Lebanon                      | 0.2 (0.1–0.3)          | 92.6% (25.8 to 185.4%)   | 3.3 (2.2–5.1)     | 4.5% (-32.1 to 55.6%)    | 0.86              |
|                              | Libya                        | 0.2 (0.1–0.4)          | 215.6% (71.3 to 427.3%)  | 3.7 (2.3–5.4)     | 39.5% (-25.6 to 142%)    | 1.02              |
|                              | Morocco                      | 0.9 (0.7–1.2)          | 130.5% (67.1 to 211.2%)  | 2.5 (1.9–3.2)     | 23.8% (-11.8 to 68%)     | 1.07              |
|                              | Palestine                    | 0.1 (0.1–0.1)          | 216.8% (132.7 to 328.8%) | 2.1 (1.7–2.5)     | 31.7% (-8.3 to 85.9%)    | 1.44              |
|                              | Oman                         | 0.1 (0.1–0.1)          | 208.9% (89.5 to 344.2%)  | 3.2 (1.9–4.4)     | 17.5% (-32.8 to 84.6%)   | 1.3               |
|                              | Qatar                        | <0.1 (<0.1–0.1)        | 619.8% (433 to 857.2%)   | 2.1 (1.6–2.7)     | -4.8% (-34.3 to 34.6%)   | 1.26              |
|                              | Saudi Arabia                 | 0.9 (0.7–1.3)          | 226.6% (85 to 448%)      | 3.1 (2.2–4.2)     | 18.7% (-35 to 116%)      | 0.88              |
|                              | Syrian Arab Republic         | 0.4 (0.3–0.7)          | 106.2% (31 to 220.1%)    | 2.9 (1.9–4.4)     | 23.9% (-21.2 to 93.2%)   | 0.87              |
|                              | Tunisia                      | 0.3 (0.2–0.5)          | 115.1% (41.1 to 224.9%)  | 2.7 (2–3.6)       | 15.9% (-24 to 76.4%)     | 0.88              |
|                              | Türkiye                      | 23.6 (18.6–29.4)       | -14.4% (-54.1 to 51.4%)  | 31.7 (24.6–40.4)  | -25% (-58 to 20.9%)      | 0.63              |
|                              | United Arab Emirates         | 0.6 (0.3–1.1)          | 961.7% (388 to 1953.3%)  | 5.9 (2.6–11.2)    | 21.9% (-44.4 to 124.6%)  | 0.98              |
|                              | Yemen                        | 0.4 (0.3–0.5)          | 196.5% (107.9 to 322.1%) | 1.8 (1.3–2.5)     | 19.9% (-23.6 to 83.1%)   | 1.11              |
|                              | Afghanistan                  | 0.6 (0.5–0.8)          | 144.4% (73.9 to 237.9%)  | 2.6 (1.8–3.6)     | -6.9% (-34.5 to 34.1%)   | 1.24              |
|                              | Sudan                        | 0.6 (0.4–0.8)          | 138.9% (63 to 241.8%)    | 2.1 (1.5–2.8)     | 17.3% (-23.4 to 74.9%)   | 1.08              |
| Other neurological disorders | Global                       | 4263.4 (3458.9–5174.1) | 56.5% (41.8 to 74.3%)    | 55.9 (45.2–68.3)  | 10.8% (0.4 to 22.9%)     | 0.83              |
|                              | North Africa and Middle East | 324.7 (250.4–417.3)    | 59.4% (26.5 to 98.9%)    | 55.2 (43–70.4)    | 6.3% (-13.5 to 30.6%)    | 0.76              |
|                              | Algeria                      | 19 (11.3–30.2)         | 53.7% (-21.7 to 206.7%)  | 46.8 (28.1–73.9)  | 4.8% (-45.2 to 93.8%)    | 0.86              |
|                              | Bahrain                      | 0.8 (0.5–1.2)          | 145% (44 to 321.6%)      | 65.6 (41.9–99.2)  | 0.3% (-39.8 to 65.6%)    | 0.91              |
|                              | Egypt                        | 49.3 (28.7–76.3)       | 96.3% (6.1 to 252.8%)    | 51.2 (31.7–76)    | 25.2% (-28.1 to 108.4%)  | 0.58              |
|                              | Iran                         | 40.7 (31.2–51.9)       | 48.5% (19.8 to 84.1%)    | 51.5 (39.2–66.3)  | 20.2% (-2.5 to 47.4%)    | 0.82              |
|                              | Iraq                         | 24 (15–36.5)           | 140.8% (37.7 to 315.4%)  | 55.4 (36.1–82.1)  | 14.4% (-32.3 to 91.1%)   | 0.99              |
|                              | Jordan                       | 5.8 (3.5–9.4)          | 204.1% (65.9 to 443.5%)  | 49.9 (31.3–77.7)  | 10.7% (-35.4 to 83.8%)   | 0.85              |
|                              | Kuwait                       | 1.8 (1–3)              | 108.4% (16.3 to 277.9%)  | 48.3 (28.3–81.4)  | -3.2% (-44.8 to 69.7%)   | 0.84              |

**Table S11** Cause- and sex-specific burden, mortality, incidence, and prevalence of neurological conditions in North Africa and Middle East countries

| Measure            |                              | All Ages                  |                           | Age-standardised     |                          | Sex ratio<br>2019 |
|--------------------|------------------------------|---------------------------|---------------------------|----------------------|--------------------------|-------------------|
|                    |                              | Number (thousand)         | Percent change            | Rate per 100,000     | Percent change           |                   |
|                    |                              | 2019                      | From 1990 to 2019         | 2019                 | From 1990 to 2019        |                   |
| Cause              | Location                     | Mean (95% UI)             | Mean (95% UI)             | Mean (95% UI)        | Mean (95% UI)            | F:M               |
|                    | Lebanon                      | 2.6 (1.6–4.1)             | 90.1% (11.5 to 257.2%)    | 51.7 (32.2–80.9)     | 28.4% (-24.8 to 133.1%)  | 0.65              |
|                    | Libya                        | 3.3 (2.2–4.7)             | 73.8% (2.4 to 219.8%)     | 51.5 (34.7–73.7)     | 23.2% (-25 to 115.9%)    | 0.71              |
|                    | Morocco                      | 16.5 (9.2–26.3)           | 71.6% (-14.5 to 239.1%)   | 47.3 (26.7–75.3)     | 32.3% (-31.9 to 148.1%)  | 0.8               |
|                    | Palestine                    | 2.4 (1.4–3.9)             | 134.8% (25.7 to 342.6%)   | 47.5 (29.7–71.6)     | 13.9% (-34 to 103.6%)    | 0.78              |
|                    | Oman                         | 1.8 (1.2–9)               | 171.8% (39.3 to 463.2%)   | 46.8 (27.9–75.1)     | 43.2% (-21.9 to 164.3%)  | 0.95              |
|                    | Qatar                        | 1.2 (0.7–1.9)             | 393.3% (181.8 to 777.7%)  | 57.8 (36.9–87)       | -3.3% (-42.3 to 67.3%)   | 1.27              |
|                    | Saudi Arabia                 | 19.7 (10.6–32.9)          | 138.3% (11.4 to 384%)     | 61.3 (34.4–101.1)    | 27.1% (-37.2 to 145.4%)  | 1.02              |
|                    | Syrian Arab Republic         | 6.9 (4.3–10.4)            | 8% (-40.5 to 96.8%)       | 48 (30.5–71.5)       | 14.1% (-34.4 to 96.1%)   | 0.93              |
|                    | Tunisia                      | 4.7 (3–7.1)               | 56.2% (-11.3 to 182.6%)   | 42 (25.4–65.3)       | 24.4% (-29.8 to 119.4%)  | 0.8               |
|                    | Türkiye                      | 61.4 (42.7–85)            | -13.6% (-43.8 to 34.7%)   | 83.4 (57.4–117.1)    | -20.8% (-48.4 to 20.7%)  | 0.72              |
|                    | United Arab Emirates         | 8.1 (5.2–11.7)            | 577.3% (281.2 to 1086.5%) | 93.8 (59.5–135.8)    | 31% (-23.2 to 121.3%)    | 0.53              |
|                    | Yemen                        | 12.4 (6.2–21.5)           | 140.2% (8.3 to 487.5%)    | 37.9 (21.8–61.2)     | 20.1% (-39.2 to 161.1%)  | 0.84              |
|                    | Afghanistan                  | 20.5 (10.5–34.7)          | 221.5% (56.3 to 543.9%)   | 49.6 (28.8–79.6)     | 5.6% (-41.9 to 94.8%)    | 0.87              |
|                    | Sudan                        | 21.4 (12.2–34.8)          | 132.1% (17.3 to 374.3%)   | 49.7 (30.3–76.2)     | 33% (-28.5 to 152.1%)    | 0.63              |
| Headache disorders | Global                       | 46619.4 (9772.9–100161.7) | 56.7% (52.4 to 62.1%)     | 581.8 (119.6–1255.6) | 1.1% (-4.2 to 2.9%)      | 1.65              |
|                    | North Africa and Middle East | 4209.8 (990.1–9068.3)     | 103.3% (94.5 to 123.7%)   | 669.6 (159.1–1431.3) | 0.1% (-2.4 to 2.4%)      | 1.65              |
|                    | Algeria                      | 288.4 (67.5–615.9)        | 90.7% (78.3 to 119.7%)    | 669.2 (155.7–1442.3) | -0.1% (-3.5 to 3.1%)     | 1.62              |
|                    | Bahrain                      | 10.6 (2.6–22.3)           | 222.7% (200.3 to 275.9%)  | 629 (149.4–1360.3)   | -0.6% (-3.9 to 2.8%)     | 1.62              |
|                    | Egypt                        | 684.8 (147.1–1492)        | 98.4% (84.9 to 112.8%)    | 690.3 (156.4–1488.7) | 1.9% (-4.8 to 8.6%)      | 1.69              |
|                    | Iran                         | 641.8 (160.7–1355.8)      | 80.2% (66.5 to 117.2%)    | 705.8 (173.2–1503.1) | 0.3% (-3.3 to 5.8%)      | 1.59              |
|                    | Iraq                         | 279.5 (60.1–621.2)        | 182.7% (170.9 to 204.1%)  | 661.6 (153–1427.4)   | 0.3% (-3.3 to 3.5%)      | 1.63              |
|                    | Jordan                       | 77.5 (17.4–171.6)         | 252.5% (233.2 to 298.1%)  | 656.4 (153.8–1428.7) | -0.7% (-3.9 to 2.5%)     | 1.62              |
|                    | Kuwait                       | 33 (7.6–71.3)             | 191.5% (173.1 to 225.4%)  | 641.1 (146.8–1408)   | 3.1% (-2.3 to 7.9%)      | 1.65              |
|                    | Lebanon                      | 35.5 (8.4–77.1)           | 77.3% (68.9 to 92.6%)     | 672.7 (153.9–1457.6) | 0.5% (-3.1 to 3.7%)      | 1.63              |
|                    | Libya                        | 49.8 (11.8–107.6)         | 105.3% (90.3 to 140.3%)   | 661.1 (155.4–1425.1) | 1.3% (-2.2 to 4.6%)      | 1.63              |
|                    | Morocco                      | 251.6 (58.5–545)          | 59.6% (51.6 to 78.5%)     | 668.2 (156.2–1445.1) | -0.2% (-3.6 to 3.1%)     | 1.62              |
|                    | Palestine                    | 31.4 (6.8–70.6)           | 178.6% (166.2 to 198.3%)  | 662.3 (157.1–1439.2) | -1% (-4.4 to 2.1%)       | 1.63              |
|                    | Oman                         | 31.6 (7.5–67.8)           | 187.2% (168.1 to 223.2%)  | 618.5 (146.4–1332.9) | -1.2% (-4.9 to 2.6%)     | 1.63              |
|                    | Qatar                        | 20.2 (5–42.9)             | 605.4% (571.7 to 667.4%)  | 585 (140.4–1252)     | -2.6% (-5.8 to 0.9%)     | 1.62              |
|                    | Saudi Arabia                 | 259.8 (62.7–548.8)        | 178.7% (155.8 to 227.9%)  | 625 (149.7–1343.4)   | -1.1% (-6.2 to 3.8%)     | 1.52              |
|                    | Syrian Arab Republic         | 101.4 (22.9–223.8)        | 40.2% (32.3 to 61.8%)     | 676.9 (157.1–1474.2) | 1.7% (-2.1 to 5.1%)      | 1.63              |
|                    | Tunisia                      | 82.7 (20.2–176.6)         | 56.3% (46.6 to 81.3%)     | 673.3 (158.7–1448.7) | 0.3% (-3.1 to 3.5%)      | 1.63              |
|                    | Türkiye                      | 588.7 (155.4–1275.3)      | 58% (47.2 to 81%)         | 656.1 (167.7–1433)   | 0.3% (-4.6 to 5%)        | 1.82              |
|                    | United Arab Emirates         | 67.6 (17.6–141.9)         | 479.9% (432.5 to 583%)    | 598.8 (142.4–1275.1) | -0.7% (-5 to 3%)         | 1.62              |
|                    | Yemen                        | 193 (40.6–431.5)          | 169.7% (159.4 to 187.2%)  | 662.8 (157.9–1435.6) | 0.1% (-3.4 to 3.6%)      | 1.61              |
|                    | Afghanistan                  | 218.4 (44.8–493.2)        | 242.9% (219.8 to 259.7%)  | 652.5 (156.7–1422.4) | -1.2% (-4.5 to 2.9%)     | 1.62              |
|                    | Sudan                        | 258 (54–579)              | 122.5% (114.3 to 132.3%)  | 668.3 (155.5–1438.9) | -0.1% (-3.7 to 3.7%)     | 1.62              |
| <b>Deaths</b>      |                              |                           |                           |                      |                          |                   |
| Meningitis         | Global                       | 236.2 (204.4–277.4)       | -45.4% (-53.5 to -35.8%)  | 3.3 (2.8–3.9)        | -56% (-62.5 to -48.3%)   | 0.84              |
|                    | North Africa and Middle East | 6.3 (5.3–7.4)             | -64.1% (-72.2 to -54.5%)  | 1.2 (1–1.4)          | -71.6% (-77.1 to -64.9%) | 0.88              |
|                    | Algeria                      | 0.3 (0.2–0.4)             | -65.2% (-78.1 to -47%)    | 0.9 (0.7–1.1)        | -74.7% (-82.4 to -64%)   | 1.06              |
|                    | Bahrain                      | <0.1 (<0.1–<0.1)          | -33.2% (-50.1 to -13%)    | 0.4 (0.3–0.5)        | -73.1% (-78.8 to -66.1%) | 0.85              |
|                    | Egypt                        | 0.8 (0.5–1.1)             | -63.9% (-76.2 to -46.5%)  | 0.8 (0.6–1.2)        | -72.2% (-81.4 to -58.8%) | 0.65              |
|                    | Iran                         | 0.6 (0.5–0.6)             | -67.7% (-75 to -57.1%)    | 0.8 (0.7–0.9)        | -72.3% (-78 to -64.3%)   | 0.81              |
|                    | Iraq                         | 0.4 (0.3–0.5)             | -63.2% (-73.7 to -48.1%)  | 1.3 (1–1.5)          | -74.8% (-81.1 to -66.3%) | 0.78              |
|                    | Jordan                       | 0.1 (0.1–0.1)             | 11.3% (-20.7 to 59.6%)    | 0.9 (0.8–1.2)        | -58.7% (-68.7 to -43.7%) | 1.03              |
|                    | Kuwait                       | <0.1 (<0.1–<0.1)          | -5.6% (-28.6 to 20.3%)    | 0.4 (0.3–0.5)        | -59.4% (-68.3 to -49.6%) | 0.59              |
|                    | Lebanon                      | <0.1 (<0.1–<0.1)          | -40% (-59.3 to -15.2%)    | 0.7 (0.5–0.9)        | -64% (-75.3 to -50.8%)   | 0.69              |



**Table S11** Cause- and sex-specific burden, mortality, incidence, and prevalence of neurological conditions in North Africa and Middle East countries

| Measure | Cause                        | Location                     | All Ages                  |                                     | Age-standardised         |                                     | Sex ratio<br>2019<br>F:M |
|---------|------------------------------|------------------------------|---------------------------|-------------------------------------|--------------------------|-------------------------------------|--------------------------|
|         |                              |                              | Number (thousand)<br>2019 | Percent change<br>From 1990 to 2019 | Rate per 100,000<br>2019 | Percent change<br>From 1990 to 2019 |                          |
|         |                              |                              | Mean (95% UI)             | Mean (95% UI)                       | Mean (95% UI)            | Mean (95% UI)                       |                          |
|         |                              | Libya                        | <0.1 (<0.1–0.1)           | -52.1% (-68.5 to -30.9%)            | 0.8 (0.6–1)              | -61.9% (-73.8 to -47.3%)            | 0.91                     |
|         |                              | Morocco                      | 0.4 (0.3–0.5)             | -74.8% (-83.3 to -63.5%)            | 1.3 (1–1.7)              | -74.7% (-82.4 to -65.3%)            | 0.79                     |
|         |                              | Palestine                    | <0.1 (<0.1–<0.1)          | -72.2% (-81.1 to -58.8%)            | 0.9 (0.8–1.1)            | -77.8% (-83.4 to -70.1%)            | 0.62                     |
|         |                              | Oman                         | <0.1 (<0.1–<0.1)          | -52.8% (-65.4 to -32.6%)            | 0.9 (0.8–1.1)            | -64.2% (-73.3 to -49.6%)            | 0.83                     |
|         |                              | Qatar                        | <0.1 (<0.1–<0.1)          | 8.8% (-31.3 to 63%)                 | 0.6 (0.4–0.8)            | -73.4% (-84.2 to -60.4%)            | 5.72                     |
|         |                              | Saudi Arabia                 | 0.2 (0.1–0.2)             | -30.7% (-49.2 to -1.3%)             | 0.9 (0.7–1.1)            | -69.7% (-77.9 to -55.6%)            | 1.35                     |
|         |                              | Syrian Arab Republic         | 0.2 (0.2–0.3)             | -74.4% (-82.4 to -63.1%)            | 1.7 (1.4–2.2)            | -64.9% (-74.9 to -51.9%)            | 0.94                     |
|         |                              | Tunisia                      | 0.1 (0.1–0.1)             | -61.5% (-75.4 to -40.8%)            | 0.8 (0.6–1)              | -69.3% (-79.3 to -55.4%)            | 0.68                     |
|         |                              | Türkiye                      | 0.4 (0.3–0.4)             | -85.3% (-90.5 to -77.2%)            | 0.5 (0.4–0.6)            | -86.7% (-91.2 to -80.4%)            | 0.78                     |
|         |                              | United Arab Emirates         | 0.1 (0–0.1)               | 70.1% (4.9 to 145.4%)               | 0.8 (0.5–1.2)            | -67.5% (-76.9 to -58.1%)            | 0.73                     |
|         |                              | Yemen                        | 0.5 (0.3–0.7)             | -47.4% (-66.3 to -19.7%)            | 2 (1.4–2.7)              | -60.2% (-72 to -44.3%)              | 0.96                     |
|         |                              | Afghanistan                  | 1.6 (1.1–2.2)             | -27.6% (-52 to 6.8%)                | 4.3 (3.1–5.7)            | -67.3% (-77.2 to -55.4%)            | 1.16                     |
|         |                              | Sudan                        | 0.7 (0.5–1)               | -76.6% (-84.7 to -64.3%)            | 1.9 (1.3–2.5)            | -80.2% (-86.3 to -71.3%)            | 0.76                     |
|         | Encephalitis                 | Global                       | 89.9 (76.5–122.9)         | -23.7% (-38.9 to 12.9%)             | 1.2 (1–1.6)              | -45.7% (-56.1 to -21.1%)            | 0.84                     |
|         |                              | North Africa and Middle East | 3.9 (3.1–5.1)             | 26.2% (-9.4 to 71.2%)               | 0.7 (0.6–0.9)            | -24.9% (-42.7 to -1.9%)             | 1.03                     |
|         |                              | Algeria                      | 0.1 (0.1–0.3)             | 18.7% (-23.4 to 79.4%)              | 0.4 (0.3–0.7)            | -23.2% (-44.7 to 7.1%)              | 0.92                     |
|         |                              | Bahrain                      | <0.1 (<0.1–<0.1)          | 95% (41.5 to 152.2%)                | 0.2 (0.2–0.3)            | -24.2% (-42.9 to -3.5%)             | 0.74                     |
|         |                              | Egypt                        | 0.9 (0.5–1.4)             | 3.6% (-36.7 to 62.8%)               | 1 (0.6–1.4)              | -30% (-54.8 to 2.7%)                | 0.94                     |
|         |                              | Iran                         | 0.2 (0.2–0.2)             | 18% (-13.1 to 52.2%)                | 0.3 (0.2–0.3)            | -15.6% (-37.9 to 4.8%)              | 0.84                     |
|         |                              | Iraq                         | 0.5 (0.3–0.6)             | 31.1% (-15.5 to 97.9%)              | 1.3 (1–1.6)              | -30.8% (-51.1 to -2.8%)             | 1.05                     |
|         |                              | Jordan                       | <0.1 (<0.1–<0.1)          | -4.5% (-43.3 to 173.6%)             | 0.2 (0.1–0.2)            | -65% (-78.2 to -13.6%)              | 1.09                     |
|         |                              | Kuwait                       | <0.1 (<0.1–<0.1)          | 73% (40 to 119.9%)                  | 0.2 (0.1–0.2)            | -22.3% (-36.3 to -4.5%)             | 1.2                      |
|         |                              | Lebanon                      | <0.1 (<0.1–<0.1)          | 38.4% (-6 to 106.6%)                | 0.3 (0.2–0.5)            | -19% (-42.9 to 19.7%)               | 0.87                     |
|         |                              | Libya                        | <0.1 (<0.1–<0.1)          | 34.3% (-8.3 to 94.4%)               | 0.3 (0.2–0.7)            | -9.6% (-35 to 33.9%)                | 0.89                     |
|         |                              | Morocco                      | 0.1 (0.1–0.3)             | 18.5% (-23.8 to 72.5%)              | 0.5 (0.3–1)              | -10.9% (-36.4 to 24.4%)             | 1.2                      |
|         |                              | Palestine                    | <0.1 (<0.1–<0.1)          | 50.3% (-3 to 118.4%)                | 0.3 (0.2–0.4)            | -22% (-43 to 6.7%)                  | 0.97                     |
|         |                              | Oman                         | 0.1 (0.1–0.1)             | 21.6% (-19.6 to 83.9%)              | 3.2 (2.5–3.9)            | -43.4% (-62.2 to -9.9%)             | 0.61                     |
|         |                              | Qatar                        | <0.1 (<0.1–<0.1)          | 299.1% (154.3 to 482.7%)            | 0.3 (0.2–0.4)            | -24.6% (-49 to 11.7%)               | 1.33                     |
|         |                              | Saudi Arabia                 | 0.2 (0.1–0.3)             | 19% (-19 to 87.5%)                  | 0.7 (0.6–0.9)            | -51.8% (-67.4 to -22.7%)            | 1.24                     |
|         |                              | Syrian Arab Republic         | 0.1 (0–0.1)               | -42.5% (-64.6 to 1.8%)              | 0.5 (0.4–0.7)            | -40.9% (-61.5 to -1.3%)             | 0.96                     |
|         | Tunisia                      | <0.1 (<0.1–0.1)              | 8.4% (-32.7 to 62.4%)     | 0.3 (0.2–0.6)                       | -23.8% (-48.9 to 11.9%)  | 0.84                                |                          |
|         | Türkiye                      | 0.2 (0.2–0.3)                | -31% (-56.3 to 4.8%)      | 0.3 (0.2–0.4)                       | -50.3% (-66.7 to -25.5%) | 0.88                                |                          |
|         | United Arab Emirates         | <0.1 (<0.1–0.1)              | 294% (144.7 to 494.9%)    | 0.3 (0.2–0.6)                       | -18.7% (-41.6 to 15.4%)  | 0.69                                |                          |
|         | Yemen                        | 0.1 (0.1–0.3)                | 62.9% (-5.7 to 178.4%)    | 0.5 (0.3–1)                         | -2% (-33.4 to 47.6%)     | 0.98                                |                          |
|         | Afghanistan                  | 1 (0.7–1.6)                  | 124.7% (57.2 to 209%)     | 4.8 (3.6–6.2)                       | -11.1% (-36.6 to 19.6%)  | 1.15                                |                          |
|         | Sudan                        | 0.2 (0.1–0.4)                | 23.2% (-32.4 to 123.2%)   | 0.5 (0.3–1)                         | -15.8% (-47.2 to 30.9%)  | 0.92                                |                          |
| Tetanus | Global                       | 34.7 (25.9–48.5)             | -87.4% (-90.5 to -81.8%)  | 0.5 (0.4–0.7)                       | -89.5% (-91.9 to -84.9%) | 0.81                                |                          |
|         | North Africa and Middle East | 1.3 (0.8–2)                  | -84.1% (-91.3 to -69%)    | 0.2 (0.2–0.4)                       | -88.9% (-93.3 to -80.6%) | 0.84                                |                          |
|         |                              | Algeria                      | <0.1 (<0.1–<0.1)          | -77.1% (-90.6 to -38.5%)            | <0.1 (<0.1–0.1)          | -84.3% (-93.4 to -61.1%)            | 0.75                     |
|         |                              | Bahrain                      | <0.1 (<0.1–<0.1)          | 62.3% (-29.1 to 156.3%)             | <0.1 (<0.1–<0.1)         | -44.1% (-76.2 to -11.3%)            | 0.98                     |
|         |                              | Egypt                        | 0.1 (0–0.4)               | -83.9% (-94.4 to -50.8%)            | 0.2 (0.1–0.5)            | -89.2% (-95.3 to -68.8%)            | 0.78                     |
|         |                              | Iran                         | <0.1 (<0.1–<0.1)          | -91.5% (-96.4 to -75.4%)            | <0.1 (<0.1–<0.1)         | -92.3% (-96.6 to -81.3%)            | 0.7                      |
|         |                              | Iraq                         | <0.1 (<0.1–<0.1)          | -90% (-96.7 to -53.6%)              | 0.1 (0–0.1)              | -92.7% (-97.3 to -72.4%)            | 0.45                     |
|         |                              | Jordan                       | <0.1 (<0.1–<0.1)          | -64.2% (-82.6 to 3.4%)              | <0.1 (<0.1–<0.1)         | -82.4% (-91.2 to -58.2%)            | 0.8                      |
|         |                              | Kuwait                       | <0.1 (<0.1–<0.1)          | 89.1% (-77.3 to 574%)               | <0.1 (<0.1–<0.1)         | -62.6% (-93.9 to -13.5%)            | 0.04                     |
|         |                              | Lebanon                      | <0.1 (<0.1–0.1)           | -52.6% (-90.5 to 57.5%)             | 0.5 (0.1–1.9)            | -79.9% (-95.6 to -34.5%)            | 0.75                     |
|         |                              | Libya                        | <0.1 (<0.1–<0.1)          | -57% (-83.6 to 8.3%)                | <0.1 (<0.1–0.1)          | -68.6% (-89.3 to -26.5%)            | 0.69                     |
|         |                              | Morocco                      | 0.1 (0–0.4)               | -93.7% (-98.5 to -77%)              | 0.4 (0.1–1.3)            | -92.6% (-98.1 to -76.1%)            | 0.72                     |
|         |                              | Palestine                    | <0.1 (<0.1–<0.1)          | -88.4% (-96.7 to -47.6%)            | <0.1 (<0.1–<0.1)         | -90.6% (-97.2 to -66.4%)            | 0.7                      |

**Table S11** Cause- and sex-specific burden, mortality, incidence, and prevalence of neurological conditions in North Africa and Middle East countries

| Measure                                 | Cause | Location                     | All Ages                  |                                     | Age-standardised         |                                     | Sex ratio<br>2019<br>F:M |
|-----------------------------------------|-------|------------------------------|---------------------------|-------------------------------------|--------------------------|-------------------------------------|--------------------------|
|                                         |       |                              | Number (thousand)<br>2019 | Percent change<br>From 1990 to 2019 | Rate per 100,000<br>2019 | Percent change<br>From 1990 to 2019 |                          |
|                                         |       |                              | Mean (95% UI)             | Mean (95% UI)                       | Mean (95% UI)            | Mean (95% UI)                       |                          |
|                                         |       | Oman                         | <0.1 (<0.1–<0.1)          | -78.3% (-92.1 to -17.8%)            | <0.1 (<0.1–<0.1)         | -92.9% (-98.7 to -57.8%)            | 0.46                     |
|                                         |       | Qatar                        | <0.1 (<0.1–<0.1)          | 225.3% (13.4 to 520.2%)             | <0.1 (<0.1–<0.1)         | -50.7% (-85.6 to 38.3%)             | 0.72                     |
|                                         |       | Saudi Arabia                 | <0.1 (<0.1–<0.1)          | -91.4% (-98.9 to -52.9%)            | <0.1 (<0.1–0.1)          | -95.5% (-99.1 to -73.3%)            | 0.62                     |
|                                         |       | Syrian Arab Republic         | <0.1 (<0.1–<0.1)          | -96.4% (-98.9 to -86.6%)            | <0.1 (<0.1–0.1)          | -93.7% (-98 to -78.8%)              | 0.53                     |
|                                         |       | Tunisia                      | <0.1 (<0.1–<0.1)          | -75.5% (-90.8 to -38.4%)            | <0.1 (<0.1–<0.1)         | -80.6% (-92.5 to -51.2%)            | 0.75                     |
|                                         |       | Türkiye                      | <0.1 (<0.1–<0.1)          | -97.7% (-98.6 to -94.1%)            | <0.1 (<0.1–<0.1)         | -98.7% (-99.3 to -96%)              | 0.82                     |
|                                         |       | United Arab Emirates         | <0.1 (<0.1–0.1)           | 2.1% (-78.1 to 288.8%)              | 2 (0.3–3.5)              | -85.5% (-95.9 to -33.6%)            | 1.78                     |
|                                         |       | Yemen                        | 0.1 (0–0.1)               | -83.6% (-94.6 to -35.4%)            | 0.2 (0.1–0.5)            | -87.7% (-95.1 to -59.4%)            | 0.49                     |
|                                         |       | Afghanistan                  | 0.8 (0.5–1.3)             | -73.8% (-86.9 to -43.4%)            | 2.5 (1.4–3.8)            | -87.7% (-92.8 to -77.3%)            | 1.01                     |
|                                         |       | Sudan                        | <0.1 (<0.1–0.1)           | -91.8% (-96.7 to -76.9%)            | 0.1 (0.1–0.2)            | -93.1% (-97 to -85.4%)              | 0.48                     |
| Brain and central nervous system cancer |       | Global                       | 246.3 (185.6–270.9)       | 76.4% (11 to 104.9%)                | 3 (2.3–3.4)              | -1.2% (-36.8 to 13.9%)              | 0.71                     |
|                                         |       | North Africa and Middle East | 17.8 (12.1–20.9)          | 111.5% (30.3 to 173.4%)             | 3.7 (2.5–4.3)            | 3% (-33.4 to 30.2%)                 | 0.87                     |
|                                         |       | Algeria                      | 0.6 (0.4–0.7)             | 102% (12.2 to 175.5%)               | 1.5 (1–1.9)              | 1.2% (-43.3 to 38.9%)               | 0.96                     |
|                                         |       | Bahrain                      | <0.1 (<0.1–<0.1)          | 232.8% (94.8 to 386%)               | 2.1 (1.4–2.7)            | -25.6% (-54.8 to 8.1%)              | 0.84                     |
|                                         |       | Egypt                        | 2.1 (1.4–3)               | 101.3% (25.7 to 185%)               | 2.7 (1.8–4.1)            | 5.4% (-28.7 to 47.6%)               | 0.84                     |
|                                         |       | Iran                         | 3.5 (1.8–4.2)             | 97.5% (5 to 138.5%)                 | 4.6 (2.3–5.5)            | -1.1% (-43.8 to 22.9%)              | 0.89                     |
|                                         |       | Iraq                         | 1.8 (1.3–2.4)             | 215.1% (65.6 to 389.7%)             | 6.4 (4.7–8.2)            | 26% (-31.9 to 93.6%)                | 0.94                     |
|                                         |       | Jordan                       | 0.2 (0.2–0.3)             | 261.5% (125.1 to 391.7%)            | 2.8 (2–3.5)              | -5.6% (-42.1 to 30.6%)              | 0.9                      |
|                                         |       | Kuwait                       | 0.1 (0–0.1)               | 205% (87.4 to 288.9%)               | 1.9 (1.3–2.4)            | 1.6% (-38.5 to 31.3%)               | 0.67                     |
|                                         |       | Lebanon                      | 0.2 (0.1–0.2)             | 82.5% (24.5 to 153.2%)              | 3.2 (2.3–4.2)            | -9% (-37.6 to 25.4%)                | 0.79                     |
|                                         |       | Libya                        | 0.2 (0.2–0.3)             | 114.8% (50.6 to 210.9%)             | 3.7 (2.8–4.9)            | -0.9% (-28.4 to 40.2%)              | 0.63                     |
|                                         |       | Morocco                      | 0.5 (0.3–0.6)             | 91.3% (24.4 to 168.9%)              | 1.4 (1–1.9)              | 5.9% (-28.1 to 45.2%)               | 1.24                     |
|                                         |       | Palestine                    | 0.2 (0.2–0.3)             | 137.9% (52.4 to 224.3%)             | 7.2 (5.2–8.7)            | -3.7% (-34.8 to 31.5%)              | 0.79                     |
|                                         |       | Oman                         | 0.1 (0–0.1)               | 176.7% (39.6 to 318.9%)             | 2.1 (1.4–2.6)            | 16.6% (-39 to 73.2%)                | 0.93                     |
|                                         |       | Qatar                        | <0.1 (<0.1–0.1)           | 485.3% (234.8 to 814.8%)            | 2.8 (2.1–4)              | -16.8% (-46.7 to 21.7%)             | 1.41                     |
|                                         |       | Saudi Arabia                 | 0.6 (0.4–0.9)             | 291.2% (111.7 to 651%)              | 2.3 (1.7–3.5)            | 32.8% (-27.6 to 148.5%)             | 0.93                     |
|                                         |       | Syrian Arab Republic         | 0.6 (0.4–0.8)             | 73.8% (6.8 to 160.3%)               | 4.5 (3–6)                | -2.6% (-34 to 43.1%)                | 0.85                     |
|                                         |       | Tunisia                      | 0.1 (0.1–0.2)             | 91.6% (22.4 to 175.2%)              | 1.1 (0.8–1.5)            | 0.5% (-34.6 to 44.2%)               | 1.18                     |
|                                         |       | Türkiye                      | 4.1 (1.8–5.7)             | 74.1% (-4.1 to 156.7%)              | 4.7 (2.1–6.6)            | -10.8% (-48.4 to 27.2%)             | 0.79                     |
|                                         |       | United Arab Emirates         | 0.3 (0.2–0.5)             | 572.5% (332.1 to 902.9%)            | 4.2 (2.6–5.7)            | -6.6% (-43.9 to 46.8%)              | 0.79                     |
|                                         |       | Yemen                        | 0.7 (0.4–0.9)             | 174.2% (48.6 to 386.6%)             | 3.4 (2.2–5.1)            | 21.7% (-29.2 to 93%)                | 0.74                     |
|                                         |       | Afghanistan                  | 1 (0.6–1.8)               | 140.1% (58 to 293.1%)               | 4.7 (2.8–8.5)            | 3.2% (-32.7 to 59.4%)               | 0.77                     |
|                                         |       | Sudan                        | 1 (0.6–1.4)               | 93.2% (-1.7 to 278.8%)              | 3.6 (2.3–5.1)            | 8.2% (-38.1 to 84%)                 | 0.7                      |
| Stroke*                                 |       | Global                       | 6552.7 (5995.2–7015.1)    | 43.3% (31 to 55.4%)                 | 84.2 (76.8–90.2)         | -36.4% (-41.6 to -31.2%)            | 0.76                     |
|                                         |       | North Africa and Middle East | 312.2 (278.4–349.7)       | 75.5% (56.2 to 98.8%)               | 87.7 (78.2–97.6)         | -27.8% (-35.4 to -16%)              | 1.07                     |
|                                         |       | Algeria                      | 24.8 (20–30.2)            | 77.1% (38.3 to 122.6%)              | 101.5 (82.6–121.6)       | -43.4% (-54.9 to -30.2%)            | 1.35                     |
|                                         |       | Bahrain                      | 0.2 (0.2–0.3)             | 109.6% (64.1 to 168.7%)             | 52.8 (43.5–66.9)         | -48.5% (-58.4 to -36.5%)            | 1.22                     |
|                                         |       | Egypt                        | 45.8 (33.6–63.2)          | 32.2% (-2.7 to 75.5%)               | 85.7 (63.1–118.9)        | -22.6% (-42.6 to 1.6%)              | 1.4                      |
|                                         |       | Iran                         | 40.9 (36.7–43.8)          | 88.6% (67.7 to 118.5%)              | 66.2 (58.7–71.3)         | -45.1% (-50.6 to -35.4%)            | 1.05                     |
|                                         |       | Iraq                         | 26.3 (21.4–31.1)          | 123.8% (77.4 to 177.3%)             | 143.3 (119.2–166.1)      | -13.7% (-30.2 to 4.5%)              | 0.83                     |
|                                         |       | Jordan                       | 3.4 (2.8–4)               | 136.2% (89.6 to 188.2%)             | 75.7 (61.3–89)           | -49.8% (-59.4 to -39.2%)            | 1.2                      |
|                                         |       | Kuwait                       | 0.9 (0.8–1.1)             | 301.8% (235.8 to 381.5%)            | 46.5 (38–55.2)           | -9.6% (-24.2 to 7.7%)               | 0.65                     |
|                                         |       | Lebanon                      | 1.8 (1.2–2.3)             | 81% (30.1 to 143.2%)                | 35.2 (24.5–45.6)         | -39.5% (-55.5 to -19.2%)            | 0.97                     |
|                                         |       | Libya                        | 3.1 (2.4–4)               | 97.1% (51.4 to 161.9%)              | 69.4 (53–90.1)           | -17.9% (-36.4 to 7.9%)              | 1.12                     |
|                                         |       | Morocco                      | 29 (23.3–35.1)            | 96.6% (55.4 to 142.5%)              | 116.4 (94.2–139.3)       | -11.9% (-29.1 to 8%)                | 0.99                     |
|                                         |       | Palestine                    | 2 (1.7–2.3)               | 59.8% (25.5 to 102.3%)              | 122.4 (105.6–138.2)      | -29.1% (-43.5 to -10.1%)            | 0.94                     |
|                                         |       | Oman                         | 1 (0.9–1.2)               | 36.7% (4.9 to 81.9%)                | 103.7 (90.7–118.7)       | -28.8% (-45 to -3.7%)               | 0.85                     |
|                                         |       | Qatar                        | 0.2 (0.1–0.2)             | 197.2% (112.5 to 306.7%)            | 52.9 (42.5–69.2)         | -36.7% (-54 to -15.7%)              | 1.91                     |

**Table S11** Cause- and sex-specific burden, mortality, incidence, and prevalence of neurological conditions in North Africa and Middle East countries

| Measure                   | Cause | Location                     | All Ages                  |                                     | Age-standardised         |                                     | Sex ratio<br>2019<br>F:M |
|---------------------------|-------|------------------------------|---------------------------|-------------------------------------|--------------------------|-------------------------------------|--------------------------|
|                           |       |                              | Number (thousand)<br>2019 | Percent change<br>From 1990 to 2019 | Rate per 100,000<br>2019 | Percent change<br>From 1990 to 2019 |                          |
|                           |       |                              | Mean (95% UI)             | Mean (95% UI)                       | Mean (95% UI)            | Mean (95% UI)                       |                          |
|                           |       | Saudi Arabia                 | 12.7 (9.8–15.4)           | 83.2% (32.6 to 152.7%)              | 102.7 (80.4–120.5)       | -32.5% (-49.1 to -10%)              | 1.03                     |
|                           |       | Syrian Arab Republic         | 9.2 (7.1–11.8)            | 24.4% (-8.8 to 68.6%)               | 99 (78.3–124.9)          | -32.2% (-50.2 to -8.6%)             | 1.19                     |
|                           |       | Tunisia                      | 8.7 (6.6–11.1)            | 114.5% (59 to 186%)                 | 80 (60.6–101.4)          | -25% (-43.8 to -0.6%)               | 0.88                     |
|                           |       | Türkiye                      | 48.9 (39.2–59.5)          | 121% (59 to 179.6%)                 | 60.6 (48.7–73.6)         | -16.5% (-39.5 to 6.2%)              | 0.99                     |
|                           |       | United Arab Emirates         | 2.2 (1.5–3)               | 348.7% (202 to 555%)                | 91.3 (70.2–118.7)        | -50% (-62 to -34.9%)                | 0.96                     |
|                           |       | Yemen                        | 14.4 (10.9–18.9)          | 108.6% (63.7 to 174.6%)             | 135.7 (102.4–176.6)      | -22.1% (-38.2 to 0.7%)              | 1.04                     |
|                           |       | Afghanistan                  | 16.8 (11.7–21.9)          | 39.3% (7.3 to 74.3%)                | 161.5 (110.3–208.5)      | -18.7% (-36.1 to -1.6%)             | 1.35                     |
|                           |       | Sudan                        | 19.6 (14.4–27.8)          | 34.7% (8.4 to 70%)                  | 125.2 (92.6–174.9)       | -29.4% (-42.2 to -12%)              | 1.13                     |
| Ischaemic stroke          |       | Global                       | 3293.4 (2973.5–3536.1)    | 60.7% (45.8 to 74.7%)               | 43.5 (39.1–46.8)         | -33.6% (-39.2 to -28.2%)            | 0.81                     |
|                           |       | North Africa and Middle East | 210.1 (187.1–234)         | 141.8% (110.1 to 175%)              | 62.9 (56.3–69.9)         | -9.1% (-20.7 to 4%)                 | 1.1                      |
|                           |       | Algeria                      | 18.7 (14.8–22.9)          | 154.5% (98.1 to 225.9%)             | 80.1 (64.4–96.8)         | -27.9% (-42.2 to -10.5%)            | 1.38                     |
|                           |       | Bahrain                      | 0.1 (0.1–0.2)             | 144.8% (93.3 to 209.7%)             | 37.5 (30.5–47.6)         | -41.4% (-53.2 to -27.1%)            | 1.23                     |
|                           |       | Egypt                        | 30.1 (21.9–41.5)          | 137% (65.8 to 212.8%)               | 62.3 (46–86.1)           | 15.3% (-17.3 to 51.5%)              | 1.51                     |
|                           |       | Iran                         | 33.2 (29.5–35.7)          | 109.7% (83.3 to 144.4%)             | 54.8 (48.3–59.2)         | -42.7% (-49.7 to -32.3%)            | 1.09                     |
|                           |       | Iraq                         | 16.7 (13.7–19.4)          | 150.2% (98.3 to 210.1%)             | 101 (83.9–116)           | -1.9% (-21.6 to 19%)                | 0.86                     |
|                           |       | Jordan                       | 2.5 (2–2.9)               | 155.9% (98.6 to 214.9%)             | 59.2 (47.4–69.3)         | -46.9% (-57.8 to -35.2%)            | 1.25                     |
|                           |       | Kuwait                       | 0.6 (0.5–0.7)             | 317.1% (246.1 to 401.3%)            | 34.2 (27.7–41)           | -10.5% (-25.6 to 6.9%)              | 0.7                      |
|                           |       | Lebanon                      | 1.5 (1–1.9)               | 140.4% (63.2 to 215.4%)             | 29.4 (19.6–38.2)         | -25% (-48 to -1.1%)                 | 0.96                     |
|                           |       | Libya                        | 2.3 (1.7–3.1)             | 181.8% (117.4 to 274.3%)            | 54.1 (40.9–72.5)         | 5.7% (-18.7 to 38.2%)               | 1.11                     |
|                           |       | Morocco                      | 21.2 (17–25.8)            | 184% (118.6 to 248.7%)              | 88.9 (71.8–108.4)        | 19% (-6.7 to 43.8%)                 | 1.01                     |
|                           |       | Palestine                    | 1.5 (1.3–1.7)             | 89.4% (48.2 to 142.7%)              | 96.5 (82–109.6)          | -15.9% (-33 to 6.2%)                | 0.96                     |
|                           |       | Oman                         | 0.6 (0.6–0.8)             | 82.1% (38.5 to 148.3%)              | 76.6 (63.8–89.9)         | -7.7% (-30.7 to 24.4%)              | 0.64                     |
|                           |       | Qatar                        | 0.1 (0.1–0.1)             | 195.5% (108.4 to 300.9%)            | 36.9 (29.4–48.4)         | -28.6% (-47.9 to -4.3%)             | 1.93                     |
|                           |       | Saudi Arabia                 | 7 (5.3–8.4)               | 93.4% (39.7 to 159.4%)              | 70.1 (53.5–82.2)         | -22.8% (-41.9 to 2.1%)              | 1.05                     |
|                           |       | Syrian Arab Republic         | 5 (3.8–6.3)               | 58.3% (10.8 to 111.7%)              | 58.3 (46.2–73.1)         | -20.6% (-42.8 to 6.2%)              | 1.35                     |
|                           |       | Tunisia                      | 6.7 (5.8–7)               | 204.9% (114.3 to 304.8%)            | 63.2 (47.3–80.4)         | -2.2% (-29.8 to 27.8%)              | 0.9                      |
|                           |       | Türkiye                      | 30.2 (24.1–36.7)          | 173.4% (88.9 to 259.4%)             | 38.3 (30.5–46.5)         | -3.7% (-32.5 to 26.5%)              | 1.05                     |
|                           |       | United Arab Emirates         | 1.2 (0.9–1.7)             | 458.2% (277.6 to 709.3%)            | 71.4 (55.2–91.1)         | -41.1% (-55.1 to -23.6%)            | 0.99                     |
|                           |       | Yemen                        | 8.9 (6.9–11.7)            | 247.2% (169.8 to 350.3%)            | 93.3 (71.2–121.2)        | 16.4% (-7.7 to 47.9%)               | 1.07                     |
|                           |       | Afghanistan                  | 8.7 (6.2–11.6)            | 107.2% (59.7 to 164.3%)             | 98 (69.2–129.4)          | 23.6% (-3.3 to 55.2%)               | 1.32                     |
|                           |       | Sudan                        | 13.1 (9.8–18.9)           | 115.4% (70.7 to 171.4%)             | 90.3 (66.7–129)          | 4.9% (-14.6 to 29.6%)               | 1.14                     |
| Intracerebral haemorrhage |       | Global                       | 2886.2 (2644.5–3099.4)    | 37.5% (21.7 to 50.9%)               | 36 (33–38.7)             | -35.6% (-42.8 to -29.2%)            | 0.7                      |
|                           |       | North Africa and Middle East | 88.5 (77.9–101.1)         | 18% (1.5 to 37.8%)                  | 21.6 (19–24.3)           | -51.4% (-58.1 to -41.3%)            | 0.99                     |
|                           |       | Algeria                      | 5.3 (4.1–6.7)             | -7.7% (-30.8 to 21.9%)              | 18.5 (14.5–23.6)         | -69.3% (-76.8 to -60.1%)            | 1.24                     |
|                           |       | Bahrain                      | 0.1 (0.1–0.1)             | 76.1% (33.5 to 133.1%)              | 13.1 (10.7–16.9)         | -61.2% (-70 to -50.1%)              | 1.24                     |
|                           |       | Egypt                        | 13.7 (9.5–19.5)           | -19% (-42.5 to 13.9%)               | 20.7 (14.5–30.1)         | -56.1% (-69.1 to -38.9%)            | 1.13                     |
|                           |       | Iran                         | 6.3 (5.8–6.7)             | 34% (14.5 to 54.5%)                 | 9.3 (8.4–9.9)            | -52.5% (-59.6 to -43.2%)            | 0.86                     |
|                           |       | Iraq                         | 9 (7.1–11.2)              | 102.5% (52.5 to 163.8%)             | 40 (32.2–48)             | -28.3% (-45.3 to -7.8%)             | 0.75                     |
|                           |       | Jordan                       | 0.8 (0.7–1)               | 93.7% (53.3 to 142.9%)              | 15.2 (12.6–18.1)         | -58.3% (-66.7 to -47.5%)            | 1.08                     |
|                           |       | Kuwait                       | 0.3 (0.2–0.3)             | 313.5% (222.5 to 417.9%)            | 10.8 (8.5–13.1)          | -3.7% (-26.2 to 21.5%)              | 0.48                     |
|                           |       | Lebanon                      | 0.3 (0.2–0.4)             | -16.7% (-40.7 to 19.7%)             | 5 (3.7–6.9)              | -69.1% (-78.1 to -55.1%)            | 0.98                     |
|                           |       | Libya                        | 0.7 (0.5–0.9)             | 15.4% (-15.4 to 60%)                | 13.3 (9.7–18.1)          | -52.9% (-65.2 to -35.6%)            | 1.16                     |
|                           |       | Morocco                      | 6.7 (5.1–8.4)             | 10.4% (-19.5 to 48%)                | 23.6 (18.4–29.1)         | -51.2% (-63.6 to -34.6%)            | 0.9                      |
|                           |       | Palestine                    | 0.5 (0.4–0.5)             | 7.6% (-17 to 41.9%)                 | 24.1 (20.3–28)           | -55.6% (-65.6 to -42.4%)            | 0.83                     |
|                           |       | Oman                         | 0.3 (0.3–0.4)             | -1.8% (-25.4 to 31.6%)              | 24 (20.4–30.5)           | -56.6% (-67.7 to -40%)              | 1.89                     |
|                           |       | Qatar                        | 0.1 (0.1–0.1)             | 187.7% (95.8 to 302.8%)             | 12.6 (9.8–16.3)          | -49.3% (-64 to -28.1%)              | 1.83                     |
|                           |       | Saudi Arabia                 | 5.3 (4.6–6)               | 74.4% (23.4 to 158.7%)              | 31.1 (24–37.4)           | -46.3% (-60.6 to -22.4%)            | 0.96                     |



**Table S11** Cause- and sex-specific burden, mortality, incidence, and prevalence of neurological conditions in North Africa and Middle East countries

| Measure                  | Cause | Location                     | All Ages                  |                                     | Age-standardised         |                                     | Sex ratio<br>2019<br>F:M |
|--------------------------|-------|------------------------------|---------------------------|-------------------------------------|--------------------------|-------------------------------------|--------------------------|
|                          |       |                              | Number (thousand)<br>2019 | Percent change<br>From 1990 to 2019 | Rate per 100,000<br>2019 | Percent change<br>From 1990 to 2019 |                          |
|                          |       |                              | Mean (95% UI)             | Mean (95% UI)                       | Mean (95% UI)            | Mean (95% UI)                       |                          |
|                          |       | Syrian Arab Republic         | 3.9 (3–5.2)               | 11.3% (-20.6 to 55.8%)              | 37.9 (29.1–49.4)         | -42.3% (-58.3 to -20.1%)            | 1.00                     |
|                          |       | Tunisia                      | 1.7 (1.3–2.2)             | 10.3% (-23.7 to 59.9%)              | 14.5 (10.8–19.1)         | -59.4% (-71.5 to -41.3%)            | 0.82                     |
|                          |       | Türkiye                      | 15.6 (12.4–19.2)          | 74.2% (26 to 123.4%)                | 18.7 (15–22.9)           | -30.5% (-49 to -9.9%)               | 0.91                     |
|                          |       | United Arab Emirates         | 0.8 (0.5–1.3)             | 264.2% (123 to 462.5%)              | 17.9 (12.5–27.2)         | -67.8% (-77.7 to -54.3%)            | 0.83                     |
|                          |       | Yemen                        | 4.6 (3.4–6.2)             | 25.2% (-7.6 to 69.9%)               | 36 (26.8–46.8)           | -55.8% (-66.7 to -40.7%)            | 0.97                     |
|                          |       | Afghanistan                  | 7 (4.9–9.3)               | 2.4% (-23.5 to 35.6%)               | 54.1 (36.6–72.4)         | -47.4% (-60 to -33.1%)              | 1.38                     |
|                          |       | Sudan                        | 5.7 (3.8–8)               | -21.7% (-40.6 to 3.9%)              | 30.4 (20.9–42.2)         | -61.5% (-70.1 to -49%)              | 1.11                     |
| Subarachnoid haemorrhage |       | Global                       | 373.1 (330–415.9)         | -12.1% (-25.3 to 26.3%)             | 4.7 (4.1–5.2)            | -57.4% (-63.8 to -38.8%)            | 0.86                     |
|                          |       | North Africa and Middle East | 13.6 (11.2–16.8)          | -15% (-35.7 to 38.8%)               | 3.2 (2.6–3.9)            | -59% (-70.7 to -31.6%)              | 1.05                     |
|                          |       | Algeria                      | 0.9 (0.7–1.2)             | -8.1% (-36.8 to 47.8%)              | 2.9 (2.1–3.7)            | -64.6% (-75.9 to -42.9%)            | 1.14                     |
|                          |       | Bahrain                      | <0.1 (<0.1–<0.1)          | 84.3% (23.7 to 177%)                | 2.2 (1.7–3.3)            | -52.9% (-69.4 to -32.1%)            | 0.97                     |
|                          |       | Egypt                        | 2 (1.4–2.9)               | -60% (-74.5 to -18.4%)              | 2.8 (1.9–3.9)            | -71.4% (-81.7 to -44.7%)            | 1.06                     |
|                          |       | Iran                         | 1.5 (1.3–1.7)             | 23.2% (-13.9 to 95.6%)              | 2.1 (1.8–2.4)            | -60.6% (-73.8 to -34.9%)            | 0.98                     |
|                          |       | Iraq                         | 0.6 (0.4–0.8)             | -8.1% (-42.6 to 65%)                | 2.3 (1.7–3.3)            | -68.4% (-80.4 to -40.9%)            | 0.91                     |
|                          |       | Jordan                       | 0.1 (0.1–0.1)             | 107.4% (41.9 to 224.3%)             | 1.2 (0.9–1.6)            | -54.9% (-69.5 to -30.4%)            | 0.96                     |
|                          |       | Kuwait                       | <0.1 (<0.1–0.1)           | 130.4% (74.7 to 243.4%)             | 1.6 (1.3–2)              | -24.8% (-43 to 3.4%)                | 0.95                     |
|                          |       | Lebanon                      | <0.1 (<0.1–0.1)           | -32.3% (-66.5 to 27.1%)             | 0.7 (0.4–1)              | -72.7% (-86.7 to -47.5%)            | 1.18                     |
|                          |       | Libya                        | 0.1 (0.1–0.2)             | -33.9% (-57.7 to 27.1%)             | 2 (1.4–2.9)              | -60.9% (-73.2 to -36.3%)            | 1.17                     |
|                          |       | Morocco                      | 1.1 (0.8–1.6)             | -9.3% (-39.6 to 56.5%)              | 3.9 (2.8–5.6)            | -56.8% (-71.3 to -21.3%)            | 1.08                     |
|                          |       | Palestine                    | <0.1 (<0.1–<0.1)          | 28.5% (-13.1 to 95.7%)              | 1.8 (1.5–2.2)            | -49.4% (-66.2 to -22.8%)            | 1.29                     |
|                          |       | Oman                         | 0.1 (0–0.1)               | -15.5% (-50.8 to 71.4%)             | 3.1 (1.8–4.7)            | -58.1% (-77.1 to -20.2%)            | 1.47                     |
|                          |       | Qatar                        | <0.1 (<0.1–<0.1)          | 225.6% (85.7 to 425.6%)             | 3.5 (2.6–4.8)            | -51.2% (-72.8 to -12.8%)            | 2.11                     |
|                          |       | Saudi Arabia                 | 0.3 (0.2–0.5)             | 41.4% (-22.5 to 148.8%)             | 1.5 (1.1–2)              | -57.5% (-76.8 to -25.9%)            | 1.27                     |
|                          |       | Syrian Arab Republic         | 0.3 (0.3–0.4)             | -55.5% (-70.1 to -25.7%)            | 2.8 (2.1–3.7)            | -59.5% (-73.3 to -35.3%)            | 0.87                     |
|                          |       | Tunisia                      | 0.3 (0.2–0.4)             | -13.3% (-48.6 to 52.4%)             | 2.3 (1.6–3.2)            | -64.2% (-79.3 to -35.6%)            | 0.97                     |
|                          |       | Türkiye                      | 3.1 (2.4–3.9)             | 46.3% (-11.3 to 180.6%)             | 3.6 (2.8–4.5)            | -39.1% (-63.8 to 20.4%)             | 0.84                     |
|                          |       | United Arab Emirates         | 0.1 (0.1–0.2)             | 205.7% (71.8 to 453.8%)             | 2 (0.9–3.2)              | -65.2% (-78.1 to -42.5%)            | 1.24                     |
|                          |       | Yemen                        | 0.8 (0.4–1.4)             | 31.6% (-6.7 to 111.7%)              | 6.4 (3.2–11.1)           | -49.2% (-63.4 to -17.8%)            | 1.11                     |
|                          |       | Afghanistan                  | 1.2 (0.4–2.1)             | 8.3% (-24.9 to 76.4%)               | 9.4 (2.8–17)             | -42.7% (-58.3 to -11.8%)            | 1.48                     |
|                          |       | Sudan                        | 0.9 (0.5–1.5)             | -31.1% (-52.4 to 35.5%)             | 4.5 (2.4–7.6)            | -63.4% (-75.2 to -30.9%)            | 1.04                     |
| Neurological disorders†* |       | Global                       | 2221.3 (1027.9–4759.8)    | 154.3% (120.5 to 174.1%)            | 30.7 (13.8–66.3)         | 1.2% (-2.8 to 7.7%)                 | 0.98                     |
|                          |       | North Africa and Middle East | 99.6 (47.3–213.2)         | 153.3% (111 to 207.8%)              | 33.2 (14.3–73.9)         | -2.8% (-9.6 to 13.9%)               | 1.01                     |
|                          |       | Algeria                      | 7.2 (3.2–16.7)            | 200% (114 to 293.4%)                | 34.2 (13.6–81.7)         | -10.5% (-26.8 to 6.2%)              | 1.07                     |
|                          |       | Bahrain                      | 0.1 (0.1–0.3)             | 273.8% (183 to 359.2%)              | 36 (15.2–80.7)           | -7.1% (-21.6 to 10.1%)              | 1.02                     |
|                          |       | Egypt                        | 10.7 (5.1–22.2)           | 109.8% (70 to 162.7%)               | 31.2 (12.8–70.1)         | 1.1% (-15.1 to 25.8%)               | 1.11                     |
|                          |       | Iran                         | 18.3 (8–41.4)             | 276.2% (178.8 to 397.5%)            | 32.1 (13.2–73.9)         | -1.4% (-8.6 to 27.8%)               | 1.01                     |
|                          |       | Iraq                         | 4.7 (2.1–9.9)             | 134% (95.7 to 183.2%)               | 32.4 (13.3–72)           | 1.2% (-13.6 to 22.6%)               | 0.88                     |
|                          |       | Jordan                       | 1.1 (0.5–2.4)             | 313% (232.7 to 404.2%)              | 30.3 (12.4–67.6)         | -9.4% (-23.2 to 11.5%)              | 1.02                     |
|                          |       | Kuwait                       | 0.5 (0.2–1.2)             | 331% (223.4 to 405%)                | 29.9 (11.4–69)           | -7.2% (-20 to 4.2%)                 | 0.97                     |
|                          |       | Lebanon                      | 1.6 (0.6–3.8)             | 210.9% (145.6 to 344.6%)            | 33 (12.6–78.5)           | -4.9% (-21.7 to 37.3%)              | 1.03                     |
|                          |       | Libya                        | 1.4 (0.6–3.2)             | 154.3% (102.3 to 218.1%)            | 35.8 (14.3–80.8)         | -1.9% (-19.7 to 23.8%)              | 1.00                     |
|                          |       | Morocco                      | 6.9 (3–15.7)              | 160.3% (118.3 to 199.1%)            | 33.1 (13.6–78)           | 6.7% (-8.8 to 26.7%)                | 0.9                      |
|                          |       | Palestine                    | 0.5 (0.3–1.1)             | 96.8% (60.8 to 145.7%)              | 34.5 (14.9–80.3)         | -6.6% (-22.6 to 16.4%)              | 0.89                     |
|                          |       | Oman                         | 0.3 (0.1–0.5)             | 131.4% (91.2 to 213.3%)             | 39.1 (17.1–90.1)         | 4.7% (-12.2 to 49.9%)               | 0.9                      |
|                          |       | Qatar                        | 0.1 (0–0.2)               | 390.2% (267.2 to 553.5%)            | 40.3 (18.1–90.3)         | 10.9% (-10.4 to 40.8%)              | 1.12                     |
|                          |       | Saudi Arabia                 | 3.1 (1.7–5.9)             | 116.5% (71.7 to 197.8%)             | 36.3 (16.7–78.1)         | -1.9% (-19.5 to 35.2%)              | 0.89                     |
|                          |       | Syrian Arab Republic         | 2.2 (1–5.1)               | 77.4% (35.5 to 138.7%)              | 33 (13.1–78.3)           | 4.9% (-16 to 40%)                   | 1.04                     |
|                          |       | Tunisia                      | 3.2 (1.3–7.4)             | 225.2% (139 to 332.1%)              | 32.7 (12.4–75.9)         | -2.1% (-22.3 to 32.4%)              | 0.95                     |

**Table S11** Cause- and sex-specific burden, mortality, incidence, and prevalence of neurological conditions in North Africa and Middle East countries

| Measure                                 | Cause | Location                     | All Ages                  |                                     | Age-standardised         |                                     | Sex ratio<br>2019<br>F:M |
|-----------------------------------------|-------|------------------------------|---------------------------|-------------------------------------|--------------------------|-------------------------------------|--------------------------|
|                                         |       |                              | Number (thousand)<br>2019 | Percent change<br>From 1990 to 2019 | Rate per 100,000<br>2019 | Percent change<br>From 1990 to 2019 |                          |
|                                         |       |                              | Mean (95% UI)             | Mean (95% UI)                       | Mean (95% UI)            | Mean (95% UI)                       |                          |
|                                         |       | Türkiye                      | 26.6 (12.1–60.8)          | 137.3% (80 to 193.6%)               | 34.5 (15.5–78.3)         | -6.9% (-22.9 to 11.4%)              | 1.04                     |
|                                         |       | United Arab Emirates         | 0.5 (0.4–0.8)             | 544% (363.6 to 791.4%)              | 35.6 (16.8–76.6)         | -7% (-22.2 to 23.5%)                | 0.89                     |
|                                         |       | Yemen                        | 2.7 (1.3–5.8)             | 170% (94.7 to 258.2%)               | 32.1 (12.5–77.4)         | 1.8% (-13.6 to 25.9%)               | 0.95                     |
|                                         |       | Afghanistan                  | 3.4 (2–6.5)               | 62.7% (37.1 to 99.1%)               | 41.1 (17.7–92.4)         | -6.7% (-22.5 to 7.6%)               | 0.98                     |
|                                         |       | Sudan                        | 4.4 (2.1–9.4)             | 85% (31.1 to 138.4%)                | 31.4 (13–72.5)           | -6.9% (-21.2 to 10.2%)              | 0.92                     |
| Alzheimer's disease and other dementias |       | Global                       | 1623.3 (407.5–4205.7)     | 189.4% (173.5 to 214.5%)            | 22.9 (5.8–59.2)          | 3% (-1.2 to 9.8%)                   | 1.17                     |
|                                         |       | North Africa and Middle East | 70.5 (17.2–185.8)         | 191.6% (169.8 to 253.2%)            | 25.5 (6.3–67.1)          | -2.3% (-9 to 17.3%)                 | 1.12                     |
|                                         |       | Algeria                      | 5.2 (1.3–15)              | 289.7% (212.2 to 394.7%)            | 27 (6.6–74.5)            | -6.3% (-20.6 to 11%)                | 1.12                     |
|                                         |       | Bahrain                      | 0.1 (0–0.2)               | 374.9% (290.8 to 482.7%)            | 27.3 (6.6–72)            | -4.4% (-18.2 to 13.2%)              | 1.14                     |
|                                         |       | Egypt                        | 6.9 (1.6–18.5)            | 110.8% (72 to 172.7%)               | 23.6 (5.4–63.1)          | -1.7% (-17.6 to 23.2%)              | 1.14                     |
|                                         |       | Iran                         | 13.9 (3.4–37.2)           | 382% (336.4 to 552.3%)              | 25.3 (6.4–67.6)          | -0.6% (-7.1 to 34.5%)               | 1.1                      |
|                                         |       | Iraq                         | 3.3 (0.8–8.5)             | 135.7% (99.4 to 182.6%)             | 25.3 (6.1–65.7)          | -0.5% (-14.6 to 18.8%)              | 1.05                     |
|                                         |       | Jordan                       | 0.8 (0.2–2.2)             | 356.6% (286.2 to 471.1%)            | 24 (6–62)                | -7.6% (-21.4 to 15.9%)              | 1.12                     |
|                                         |       | Kuwait                       | 0.4 (0.1–1.1)             | 439.9% (380.6 to 519.8%)            | 25.1 (6.5–64)            | -2.1% (-12.8 to 10.4%)              | 1.08                     |
|                                         |       | Lebanon                      | 1.3 (0.3–3.4)             | 246% (186.4 to 425.1%)              | 26.8 (6.5–70.8)          | -2.6% (-19.7 to 48%)                | 1.19                     |
|                                         |       | Libya                        | 1.1 (0.3–2.8)             | 162.3% (114 to 232.1%)              | 28.6 (7.2–72.8)          | -3.8% (-21.4 to 22%)                | 1.11                     |
|                                         |       | Morocco                      | 4.9 (1.1–13.8)            | 161.9% (120.2 to 204.4%)            | 25.4 (5.9–70.2)          | 0.7% (-14.2 to 16.1%)               | 1.01                     |
|                                         |       | Palestine                    | 0.3 (0.1–0.9)             | 98% (65.5 to 145%)                  | 25.9 (6.1–72.1)          | -6.1% (-21 to 15.6%)                | 1.02                     |
|                                         |       | Oman                         | 0.2 (0–0.4)               | 117.5% (79.4 to 214.4%)             | 28.8 (6.7–81)            | -3.5% (-20.3 to 46.7%)              | 1.11                     |
|                                         |       | Qatar                        | <0.1 (<0.1–0.1)           | 409.8% (276.9 to 594.1%)            | 27.9 (6.5–76)            | 5.8% (-14.1 to 28.2%)               | 1.12                     |
|                                         |       | Saudi Arabia                 | 1.7 (0.4–4.5)             | 106.2% (67.4 to 196.6%)             | 26.3 (6.3–68.4)          | -2.1% (-19.6 to 41%)                | 1.09                     |
|                                         |       | Syrian Arab Republic         | 1.6 (0.4–4.6)             | 75% (34.9 to 142.1%)                | 26 (6.3–70.3)            | 3.1% (-18.3 to 44.3%)               | 1.14                     |
|                                         |       | Tunisia                      | 2.5 (0.6–6.8)             | 270.1% (189 to 428%)                | 26.5 (6.3–70.3)          | -2.8% (-22.7 to 37%)                | 1.07                     |
|                                         |       | Türkiye                      | 19.7 (5.1–53.6)           | 190.5% (141.7 to 254%)              | 25.8 (6.6–70)            | -3.8% (-20.1 to 16.3%)              | 1.19                     |
|                                         |       | United Arab Emirates         | 0.1 (0–0.4)               | 496.6% (359.4 to 708.4%)            | 24.2 (5.9–64.2)          | -6.1% (-19.9 to 26.8%)              | 1.07                     |
|                                         |       | Yemen                        | 1.7 (0.4–4.7)             | 227.9% (174.9 to 303.6%)            | 25.5 (6.2–71.1)          | 0.7% (-14 to 21.5%)                 | 1.05                     |
|                                         |       | Afghanistan                  | 1.8 (0.4–4.8)             | 59.1% (32 to 85.4%)                 | 30.8 (7.5–82.3)          | -3.3% (-18.5 to 10%)                | 1.05                     |
|                                         |       | Sudan                        | 2.8 (0.7–8)               | 132.5% (103.4 to 176.2%)            | 23.9 (5.6–66)            | -5.1% (-16.2 to 11.2%)              | 1.06                     |
| Parkinson's disease                     |       | Global                       | 362.9 (326.9–388.2)       | 146.5% (128.1 to 162.8%)            | 4.8 (4.3–5.1)            | 3.8% (-3.3 to 10.1%)                | 0.53                     |
|                                         |       | North Africa and Middle East | 16.8 (14.6–21.6)          | 179.4% (145.9 to 225.5%)            | 5.3 (4.6–6.9)            | 2.3% (-10 to 19%)                   | 0.66                     |
|                                         |       | Algeria                      | 1.3 (1–1.6)               | 192.2% (125.1 to 277.6%)            | 5.4 (4.4–6.7)            | -18.7% (-36.3 to 4.6%)              | 0.84                     |
|                                         |       | Bahrain                      | <0.1 (<0.1–<0.1)          | 286.6% (187.6 to 403.7%)            | 6 (4.2–7.4)              | -7.7% (-29.9 to 17.9%)              | 0.7                      |
|                                         |       | Egypt                        | 2.4 (1.8–3.7)             | 133.4% (84.4 to 193.2%)             | 6 (4.6–9.3)              | 12.2% (-10.6 to 38.2%)              | 1.18                     |
|                                         |       | Iran                         | 2.8 (2.4–3.2)             | 343.1% (276.8 to 429.9%)            | 4.8 (4.1–5.3)            | 6.7% (-12.6 to 28.4%)               | 0.67                     |
|                                         |       | Iraq                         | 0.8 (0.7–1.2)             | 202% (137 to 289.8%)                | 5.7 (4.6–7.4)            | 22.8% (-3.6 to 58%)                 | 0.39                     |
|                                         |       | Jordan                       | 0.2 (0.2–0.2)             | 332.8% (245.4 to 442.6%)            | 4.9 (4.1–5.8)            | -13.2% (-30 to 8.6%)                | 0.67                     |
|                                         |       | Kuwait                       | 0.1 (0–0.1)               | 253.2% (199.8 to 317.8%)            | 3.5 (2.8–4.2)            | -25.1% (-36.3 to -11.7%)            | 0.46                     |
|                                         |       | Lebanon                      | 0.2 (0.2–0.3)             | 171.3% (98.1 to 266.4%)             | 4.4 (3.5–6)              | -14.1% (-37.2 to 15.7%)             | 0.55                     |
|                                         |       | Libya                        | 0.2 (0.2–0.3)             | 202.9% (125 to 314.9%)              | 5 (3.7–6.5)              | 9.9% (-18.1 to 50.5%)               | 0.62                     |
|                                         |       | Morocco                      | 1.4 (1.1–1.6)             | 244.3% (174.9 to 340.4%)            | 6 (4.9–7)                | 46.6% (16.7 to 85.9%)               | 0.54                     |
|                                         |       | Palestine                    | 0.1 (0.1–0.1)             | 118.5% (64.7 to 206.9%)             | 6.2 (4.7–7.2)            | -2.5% (-26.2 to 36.2%)              | 0.55                     |
|                                         |       | Oman                         | 0.1 (0–0.1)               | 185.9% (105.3 to 287.6%)            | 9.1 (4.9–10.7)           | 44.7% (6.3 to 96%)                  | 0.45                     |
|                                         |       | Qatar                        | <0.1 (<0.1–<0.1)          | 450.7% (294.9 to 662.2%)            | 11.1 (6.5–14.7)          | 35.3% (1.2 to 78.3%)                | 1.00                     |
|                                         |       | Saudi Arabia                 | 0.6 (0.4–0.7)             | 108% (58.2 to 207.5%)               | 7.3 (5.8–7)              | 0.2% (-22.2 to 47.7%)               | 0.36                     |
|                                         |       | Syrian Arab Republic         | 0.4 (0.3–0.6)             | 151% (86.5 to 240.1%)               | 5.7 (3.7–7.2)            | 21.1% (-8.4 to 61.8%)               | 0.69                     |
|                                         |       | Tunisia                      | 0.5 (0.4–0.6)             | 237.3% (150.4 to 341.6%)            | 4.6 (3.4–6)              | 12% (-16.4 to 45.8%)                | 0.52                     |
|                                         |       | Türkiye                      | 3.8 (2.9–7.1)             | 164.1% (106 to 229.6%)              | 4.9 (3.7–9.1)            | -6.8% (-27 to 16.1%)                | 0.67                     |
|                                         |       | United Arab Emirates         | 0.1 (0.1–0.1)             | 527.4% (356 to 824.1%)              | 8 (4.8–10.4)             | -12.8% (-32.3 to 23.5%)             | 0.58                     |
|                                         |       | Yemen                        | 0.4 (0.3–0.5)             | 246% (169.5 to 358.9%)              | 4.6 (3.6–6)              | 21.9% (-3.2 to 58.7%)               | 0.59                     |

**Table S11** Cause- and sex-specific burden, mortality, incidence, and prevalence of neurological conditions in North Africa and Middle East countries

| Measure              |                              | All Ages                   |                                     | Age-standardised         |                                     | Sex ratio |
|----------------------|------------------------------|----------------------------|-------------------------------------|--------------------------|-------------------------------------|-----------|
|                      |                              | Number (thousand)<br>2019  | Percent change<br>From 1990 to 2019 | Rate per 100,000<br>2019 | Percent change<br>From 1990 to 2019 |           |
| Cause                | Location                     | Mean (95% UI)              | Mean (95% UI)                       | Mean (95% UI)            | Mean (95% UI)                       | F:M       |
| Idiopathic epilepsy  | Afghanistan                  | 0.6 (0.4–0.7)              | 50.8% (17.4 to 90.2%)               | 6.8 (5.3–8.5)            | -2.3% (-22.7 to 20.3%)              | 0.68      |
|                      | Sudan                        | 0.7 (0.6–0.9)              | 94.9% (46.1 to 165.3%)              | 5.2 (4.1–6.5)            | 0.1% (-24.7 to 36.8%)               | 0.53      |
|                      | Global                       | 114 (100.2–129.9)          | 13.9% (-1.4 to 51.6%)               | 1.5 (1.3–1.7)            | -24.8% (-34.2 to -1.6%)             | 0.71      |
|                      | North Africa and Middle East | 6.6 (5.4–7.6)              | 5.3% (-16.7 to 70.4%)               | 1.2 (1–1.4)              | -33.4% (-46.2 to 2.1%)              | 0.88      |
|                      | Algeria                      | 0.4 (0.3–0.5)              | -16.3% (-39.6 to 30.7%)             | 1.1 (0.8–1.3)            | -49.1% (-62.4 to -24.2%)            | 1.02      |
|                      | Bahrain                      | <0.1 (<0.1–<0.1)           | 102.2% (56.6 to 171.7%)             | 1.7 (1.3–2.1)            | -34.3% (-49.1 to -13.8%)            | 0.82      |
|                      | Egypt                        | 0.4 (0.3–0.6)              | 8.4% (-21.3 to 66.4%)               | 0.5 (0.3–0.7)            | -34.5% (-52 to -4.4%)               | 0.68      |
|                      | Iran                         | 0.7 (0.6–0.8)              | -33.7% (-49.3 to 7.6%)              | 0.8 (0.7–1)              | -51.1% (-60.7 to -26.1%)            | 0.74      |
|                      | Iraq                         | 0.3 (0.2–0.4)              | 31.1% (-6.5 to 101%)                | 0.8 (0.6–1)              | -42.7% (-58 to -15.7%)              | 0.91      |
|                      | Jordan                       | 0.1 (0.1–0.1)              | 107% (54.6 to 194.2%)               | 0.6 (0.5–0.8)            | -38.7% (-52.8 to -12.8%)            | 0.82      |
|                      | Kuwait                       | <0.1 (<0.1–<0.1)           | 65.6% (38 to 112.8%)                | 0.7 (0.6–0.9)            | -30.6% (-42.2 to -13%)              | 0.8       |
|                      | Lebanon                      | <0.1 (<0.1–<0.1)           | 11.6% (-19.2 to 62.4%)              | 0.9 (0.6–1.2)            | -36.7% (-54.2 to -10.2%)            | 0.7       |
|                      | Libya                        | 0.1 (0.1–0.1)              | 23.2% (-11.1 to 80.8%)              | 1.1 (0.8–1.5)            | -25.7% (-44.4 to 3.3%)              | 0.82      |
|                      | Morocco                      | 0.3 (0.1–0.8)              | 19.9% (-21.2 to 82.6%)              | 0.9 (0.3–2.5)            | -21.8% (-45.3 to 13.6%)             | 1.32      |
|                      | Palestine                    | 0.1 (0.1–0.1)              | 56.4% (16.7 to 142.5%)              | 1.6 (1.4–2)              | -29.9% (-47.5 to 3%)                | 0.74      |
|                      | Oman                         | <0.1 (<0.1–<0.1)           | 42.5% (-3.6 to 152.9%)              | 0.4 (0.3–0.5)            | -37.8% (-56.6 to -1.6%)             | 0.75      |
|                      | Qatar                        | <0.1 (<0.1–<0.1)           | 269.9% (170.8 to 453.3%)            | 0.5 (0.4–0.7)            | -40.4% (-55.9 to -15.8%)            | 1.8       |
| Saudi Arabia         | 0.6 (0.4–0.8)                | 141.4% (41.8 to 298.1%)    | 1.8 (1.4–2.4)                       | -14.4% (-49.4 to 37.2%)  | 1.1                                 |           |
| Syrian Arab Republic | 0.1 (0.1–0.1)                | -8.3% (-37.9 to 63.4%)     | 0.6 (0.5–0.8)                       | -33.3% (-53.5 to 12.7%)  | 0.82                                |           |
| Tunisia              | 0.1 (0.1–0.1)                | -17% (-43.8 to 26%)        | 0.9 (0.6–1.2)                       | -40.6% (-58.7 to -11.3%) | 0.76                                |           |
| Türkiye              | 1.4 (1.1–1.7)                | -17% (-41.6 to 61.2%)      | 1.7 (1.4–2.1)                       | -34.1% (-56.8 to 25.7%)  | 0.75                                |           |
| United Arab Emirates | 0.1 (0.1–0.2)                | 340.1% (173.1 to 610.8%)   | 1.4 (0.9–2.1)                       | -31.9% (-52.9 to 1.1%)   | 0.68                                |           |
| Yemen                | 0.4 (0.3–0.5)                | 31.4% (-15 to 180.6%)      | 1.4 (0.9–1.9)                       | -29.8% (-52.2 to 19.6%)  | 0.85                                |           |
| Afghanistan          | 0.9 (0.4–1.2)                | 62% (19.4 to 184.5%)       | 2.5 (1.3–3.5)                       | -41.3% (-55 to -8.7%)    | 1.13                                |           |
| Sudan                | 0.6 (0.4–0.8)                | -13.4% (-49.1 to 109.2%)   | 1.6 (1.2–2.1)                       | -45.5% (-65.4 to 4.4%)   | 0.76                                |           |
| Multiple sclerosis   | Global                       | 22.4 (20.2–27.8)           | 68% (40.1 to 84%)                   | 0.3 (0.2–0.3)            | -14% (-29.1 to -5.9%)               | 1.35      |
|                      | North Africa and Middle East | 1.4 (1.2–1.8)              | 147.3% (83.1 to 248%)               | 0.3 (0.2–0.3)            | 5.1% (-25 to 47.6%)                 | 1.21      |
| Motor neuron         | Algeria                      | 0.1 (0.1–0.1)              | 166.5% (59.6 to 303%)               | 0.3 (0.1–0.4)            | 1.6% (-38.3 to 50.7%)               | 1.43      |
|                      | Bahrain                      | <0.1 (<0.1–<0.1)           | 422.7% (202.3 to 628.6%)            | 0.1 (0.1–0.2)            | -6.6% (-44.1 to 28.6%)              | 1.49      |
|                      | Egypt                        | 0.2 (0.1–0.4)              | 96.5% (-24.9 to 377.8%)             | 0.2 (0.1–0.4)            | 5.9% (-48 to 122.5%)                | 1.18      |
|                      | Iran                         | 0.4 (0.3–0.6)              | 175.2% (96.6 to 288.4%)             | 0.5 (0.4–0.7)            | 4.8% (-28.2 to 55.7%)               | 1.06      |
|                      | Iraq                         | <0.1 (<0.1–<0.1)           | 225.3% (107.9 to 436.1%)            | 0.1 (0.1–0.2)            | 4.8% (-31.5 to 69.7%)               | 1.05      |
|                      | Jordan                       | <0.1 (<0.1–<0.1)           | 308.5% (164.5 to 467.6%)            | 0.2 (0.1–0.2)            | -14.5% (-43.1 to 18%)               | 1.5       |
|                      | Kuwait                       | <0.1 (<0.1–<0.1)           | 300.3% (202.6 to 437.9%)            | 0.1 (0.1–0.2)            | 0.8% (-23 to 34.7%)                 | 1.09      |
|                      | Lebanon                      | <0.1 (<0.1–<0.1)           | 128.8% (49.9 to 257.5%)             | 0.3 (0.1–0.4)            | 7.5% (-29.5 to 66.7%)               | 1.15      |
|                      | Libya                        | <0.1 (<0.1–<0.1)           | 288.9% (132.2 to 591.5%)            | 0.3 (0.2–0.5)            | 38.4% (-17.3 to 139.5%)             | 1.21      |
|                      | Morocco                      | 0.1 (0.1–0.1)              | 177.1% (74.4 to 334.2%)             | 0.3 (0.1–0.4)            | 31.5% (-16.5 to 103.4%)             | 1.34      |
|                      | Palestine                    | <0.1 (<0.1–<0.1)           | 214.7% (89.1 to 448.7%)             | 0.2 (0.2–0.4)            | 1.6% (-37.7 to 77.2%)               | 0.94      |
|                      | Oman                         | <0.1 (<0.1–<0.1)           | 248.6% (73.1 to 534.5%)             | 0.3 (0.1–0.4)            | 16.2% (-42.4 to 115.1%)             | 1.14      |
|                      | Qatar                        | <0.1 (<0.1–<0.1)           | 594.2% (327.3 to 934.6%)            | 0.1 (0.1–0.1)            | -14.3% (-44.8 to 29.6%)             | 1.75      |
|                      | Saudi Arabia                 | <0.1 (<0.1–<0.1)           | 348.6% (142.5 to 1082.3%)           | 0.1 (0.1–0.2)            | 17.7% (-33.3 to 198.9%)             | 1.1       |
|                      | Syrian Arab Republic         | <0.1 (<0.1–<0.1)           | 123.7% (39.3 to 273.7%)             | 0.1 (0.1–0.2)            | 4.4% (-34.3 to 71.8%)               | 1.31      |
|                      | Tunisia                      | <0.1 (<0.1–<0.1)           | 178.5% (75.4 to 355.8%)             | 0.3 (0.1–0.4)            | 24.3% (-22 to 102.2%)               | 1.24      |
|                      | Türkiye                      | 0.2 (0.2–0.3)              | 53.9% (-13.4 to 151.5%)             | 0.2 (0.2–0.3)            | -23.2% (-53.2 to 26%)               | 1.37      |
| United Arab Emirates | <0.1 (<0.1–<0.1)             | 1132.7% (586.4 to 1830.3%) | 0.4 (0.2–0.7)                       | 24.9% (-27.7 to 81.3%)   | 0.95                                |           |
| Yemen                | <0.1 (<0.1–<0.1)             | 270.7% (103.4 to 567.6%)   | 0.2 (0.1–0.3)                       | 28.9% (-26.4 to 121.5%)  | 1.04                                |           |
| Afghanistan          | 0.1 (0–0.2)                  | 186.7% (81 to 382.9%)      | 0.4 (0.2–0.9)                       | 8.8% (-28.9 to 66.6%)    | 1.63                                |           |
| Sudan                | 0.1 (0–0.1)                  | 166.2% (46.7 to 377.5%)    | 0.2 (0.1–0.3)                       | 19.7% (-31.4 to 105.2%)  | 1.02                                |           |
| Motor neuron         | Global                       | 39.1 (36.6–41.1)           | 121.4% (108 to 135.4%)              | 0.5 (0.4–0.5)            | 12.4% (5.7 to 19.3%)                | 0.7       |

**Table S11** Cause- and sex-specific burden, mortality, incidence, and prevalence of neurological conditions in North Africa and Middle East countries

| Measure                      |                              | All Ages                  |                                     | Age-standardised         |                                     | Sex ratio |
|------------------------------|------------------------------|---------------------------|-------------------------------------|--------------------------|-------------------------------------|-----------|
|                              |                              | Number (thousand)<br>2019 | Percent change<br>From 1990 to 2019 | Rate per 100,000<br>2019 | Percent change<br>From 1990 to 2019 |           |
| Cause                        | Location                     | Mean (95% UI)             | Mean (95% UI)                       | Mean (95% UI)            | Mean (95% UI)                       | F:M       |
| disease                      | North Africa and Middle East | 1.1 (0.9–1.3)             | 90.4% (23.9 to 177.6%)              | 0.2 (0.2–0.3)            | 9.3% (-26.7 to 51.1%)               | 0.73      |
|                              | Algeria                      | <0.1 (<0.1–<0.1)          | 149.1% (67.4 to 278.1%)             | 0.1 (0–0.1)              | -2.1% (-34.8 to 49.6%)              | 1.03      |
|                              | Bahrain                      | <0.1 (<0.1–<0.1)          | 108.8% (52.1 to 183.7%)             | <0.1 (<0.1–0.1)          | -63.6% (-73.4 to -51.1%)            | 0.96      |
|                              | Egypt                        | 0.2 (0.1–0.3)             | 287.6% (104.4 to 557.7%)            | 0.2 (0.1–0.4)            | 85% (-4.9 to 213.5%)                | 0.77      |
|                              | Iran                         | 0.1 (0.1–0.1)             | 268.2% (140 to 424.8%)              | 0.1 (0.1–0.2)            | 61.9% (4 to 134%)                   | 0.9       |
|                              | Iraq                         | <0.1 (<0.1–<0.1)          | 240.1% (91.6 to 463.7%)             | <0.1 (<0.1–0.1)          | 19.7% (-35.8 to 111.1%)             | 0.94      |
|                              | Jordan                       | <0.1 (<0.1–<0.1)          | 455.5% (263.9 to 761%)              | 0.1 (0–0.1)              | 21.1% (-22.7 to 91.8%)              | 0.55      |
|                              | Kuwait                       | <0.1 (<0.1–<0.1)          | 12.5% (-20.2 to 52.2%)              | 0.1 (0.1–0.2)            | -54.4% (-66.8 to -38.7%)            | 0.32      |
|                              | Lebanon                      | <0.1 (<0.1–<0.1)          | 111.7% (19.5 to 245.5%)             | 0.1 (0–0.1)              | 7.3% (-39.3 to 75.9%)               | 0.73      |
|                              | Libya                        | <0.1 (<0.1–<0.1)          | 297.9% (82.7 to 653.6%)             | 0.1 (0.1–0.1)            | 51.4% (-30.9 to 187%)               | 0.94      |
|                              | Morocco                      | <0.1 (<0.1–<0.1)          | 193.5% (84 to 332.1%)               | 0.1 (0–0.1)              | 35% (-15.5 to 101.1%)               | 0.94      |
|                              | Palestine                    | <0.1 (<0.1–<0.1)          | 285% (131.8 to 525.1%)              | <0.1 (<0.1–0.1)          | 50.6% (-15.5 to 165.2%)             | 1.27      |
|                              | Oman                         | <0.1 (<0.1–<0.1)          | 235.5% (71.8 to 471.5%)             | 0.1 (0–0.1)              | 25.2% (-37.3 to 123.4%)             | 1.24      |
|                              | Qatar                        | <0.1 (<0.1–<0.1)          | 697.7% (382.4 to 1191.9%)           | <0.1 (<0.1–0.1)          | -4.2% (-46 to 63.4%)                | 1.27      |
|                              | Saudi Arabia                 | <0.1 (<0.1–<0.1)          | 287.5% (87 to 737.1%)               | 0.1 (0.1–0.1)            | 24% (-40.7 to 186.8%)               | 0.74      |
|                              | Syrian Arab Republic         | <0.1 (<0.1–<0.1)          | 187.2% (55.7 to 392%)               | 0.1 (0–0.1)              | 34.7% (-25.8 to 136.8%)             | 0.73      |
|                              | Tunisia                      | <0.1 (<0.1–<0.1)          | 178.8% (57.8 to 386.7%)             | 0.1 (0–0.1)              | 25.3% (-30 to 119.5%)               | 0.74      |
|                              | Türkiye                      | 0.6 (0.5–0.8)             | 44.6% (-12.4 to 119.7%)             | 0.8 (0.6–0.9)            | -4.7% (-38.7 to 39.2%)              | 0.61      |
|                              | United Arab Emirates         | <0.1 (<0.1–<0.1)          | 1180.6% (407.6 to 2470.6%)          | 0.2 (0.1–0.3)            | 24.9% (-49.3 to 143.6%)             | 0.93      |
|                              | Yemen                        | <0.1 (<0.1–<0.1)          | 223% (90.7 to 460.4%)               | <0.1 (<0.1–0.1)          | 24% (-31.2 to 125.4%)               | 0.96      |
|                              | Afghanistan                  | <0.1 (<0.1–<0.1)          | 92.7% (24.9 to 201.1%)              | 0.1 (0–0.1)              | -8.7% (-41.4 to 43.1%)              | 1.12      |
|                              | Sudan                        | <0.1 (<0.1–<0.1)          | 147.7% (49.3 to 304.6%)             | 0.1 (0–0.1)              | 21.6% (-27.9 to 102.9%)             | 0.93      |
| Other neurological disorders | Global                       | 59.6 (55.1–64.6)          | 74.8% (59.5 to 91.6%)               | 0.8 (0.7–0.8)            | -0.2% (-8.2 to 9.2%)                | 0.74      |
|                              | North Africa and Middle East | 3.3 (2.9–3.8)             | 85.9% (42.8 to 136.2%)              | 0.7 (0.6–0.8)            | 17.4% (-7.9 to 49.9%)               | 0.67      |
|                              | Algeria                      | 0.2 (0.1–0.2)             | 95.3% (32.9 to 164.6%)              | 0.5 (0.4–0.5)            | 10.4% (-20.6 to 45.5%)              | 0.75      |
|                              | Bahrain                      | <0.1 (<0.1–<0.1)          | 199.2% (131.5 to 284.7%)            | 0.8 (0.7–1)              | -0.8% (-21.5 to 24.7%)              | 0.7       |
|                              | Egypt                        | 0.5 (0.3–0.7)             | 141.1% (70.4 to 228.5%)             | 0.7 (0.5–1)              | 54.1% (9 to 104.8%)                 | 0.42      |
|                              | Iran                         | 0.4 (0.4–0.4)             | 138.6% (82.4 to 224.6%)             | 0.6 (0.5–0.6)            | 39.2% (8.1 to 95.9%)                | 0.68      |
|                              | Iraq                         | 0.2 (0.2–0.3)             | 144% (72.2 to 285.9%)               | 0.6 (0.4–0.7)            | 12.1% (-19.5 to 74.4%)              | 0.95      |
|                              | Jordan                       | <0.1 (<0.1–0.1)           | 201% (120.6 to 307.9%)              | 0.5 (0.4–0.6)            | -0.3% (-23.7 to 30.5%)              | 0.62      |
|                              | Kuwait                       | <0.1 (<0.1–<0.1)          | 81.1% (39.7 to 130.5%)              | 0.4 (0.3–0.4)            | -24.6% (-40.4 to -5.3%)             | 0.67      |
|                              | Lebanon                      | <0.1 (<0.1–<0.1)          | 171.8% (93.4 to 278.8%)             | 0.6 (0.5–0.8)            | 46% (3.4 to 100.9%)                 | 0.39      |
|                              | Libya                        | <0.1 (<0.1–0.1)           | 190.1% (89.2 to 360%)               | 0.7 (0.5–0.8)            | 58.5% (6.7 to 145.6%)               | 0.56      |
|                              | Morocco                      | 0.2 (0.1–0.2)             | 129.5% (71.1 to 211.1%)             | 0.5 (0.3–0.6)            | 48.6% (12 to 96.5%)                 | 0.56      |
|                              | Palestine                    | <0.1 (<0.1–<0.1)          | 116.4% (43.9 to 267.2%)             | 0.5 (0.4–0.6)            | 15.9% (-19 to 95.8%)                | 0.66      |
|                              | Oman                         | <0.1 (<0.1–<0.1)          | 215.4% (88.9 to 389%)               | 0.5 (0.4–0.6)            | 62.6% (1.1 to 157.2%)               | 1.12      |
|                              | Qatar                        | <0.1 (<0.1–<0.1)          | 348.7% (207 to 595.6%)              | 0.7 (0.5–0.9)            | -10.8% (-38 to 41.8%)               | 3.08      |
|                              | Saudi Arabia                 | 0.2 (0.1–0.2)             | 143.7% (49.6 to 327.5%)             | 0.7 (0.5–0.8)            | 19.2% (-23.7 to 114.1%)             | 1.09      |
|                              | Syrian Arab Republic         | 0.1 (0.1–0.1)             | 21.2% (-17.9 to 89.9%)              | 0.6 (0.4–0.7)            | 12.7% (-21.6 to 76.8%)              | 1.04      |
|                              | Tunisia                      | 0.1 (0–0.1)               | 121.4% (46 to 215%)                 | 0.4 (0.3–0.6)            | 35.9% (-9 to 91.1%)                 | 0.55      |
|                              | Türkiye                      | 0.9 (0.7–1.1)             | 14.3% (-17.1 to 60.8%)              | 1.1 (0.9–1.4)            | -14.7% (-36.2 to 19%)               | 0.72      |
|                              | United Arab Emirates         | 0.1 (0.1–0.2)             | 1061.4% (587.3 to 1672.4%)          | 1.5 (0.9–2.1)            | 67.4% (6.1 to 138.3%)               | 0.33      |
|                              | Yemen                        | 0.1 (0.1–0.1)             | 151.4% (47.2 to 333.8%)             | 0.3 (0.3–0.5)            | 34.3% (-13.1 to 129%)               | 0.74      |
|                              | Afghanistan                  | 0.1 (0.1–0.2)             | 151.2% (77.1 to 268.8%)             | 0.5 (0.4–0.7)            | 5.5% (-23.1 to 49.9%)               | 0.69      |
|                              | Sudan                        | 0.2 (0.1–0.2)             | 145.6% (34.7 to 301.2%)             | 0.5 (0.4–0.8)            | 57.6% (-3.2 to 131.8%)              | 0.46      |
| <b>Incidence</b>             |                              |                           |                                     |                          |                                     |           |
| Meningitis                   | Global                       | 2507.2 (2113.1–2988.7)    | -23.8% (-26.5 to -20.4%)            | 35.4 (29.6–42.5)         | -35.9% (-37 to -34.6%)              | 0.92      |

**Table S11** Cause- and sex-specific burden, mortality, incidence, and prevalence of neurological conditions in North Africa and Middle East countries

| Measure      | Cause | Location                     | All Ages                  |                                     | Age-standardised         |                                     | Sex ratio<br>2019<br>F:M |
|--------------|-------|------------------------------|---------------------------|-------------------------------------|--------------------------|-------------------------------------|--------------------------|
|              |       |                              | Number (thousand)<br>2019 | Percent change<br>From 1990 to 2019 | Rate per 100,000<br>2019 | Percent change<br>From 1990 to 2019 |                          |
|              |       |                              | Mean (95% UI)             | Mean (95% UI)                       | Mean (95% UI)            | Mean (95% UI)                       |                          |
|              |       | North Africa and Middle East | 128.5 (106.7–152.7)       | -9.9% (-16.3 to -1.9%)              | 22.5 (18.9–26.4)         | -37% (-39.9 to -33.9%)              | 1.12                     |
|              |       | Algeria                      | 7.9 (6.4–9.5)             | -5.1% (-13.2 to 4.1%)               | 19.8 (16.4–23.5)         | -33.8% (-38.6 to -28.8%)            | 1.03                     |
|              |       | Bahrain                      | 0.2 (0.2–0.3)             | 27.6% (9.2 to 50.4%)                | 19.5 (15.7–23.5)         | -46% (-51.2 to -40.6%)              | 0.87                     |
|              |       | Egypt                        | 21.6 (17.6–26.8)          | -6% (-16.6 to 5.7%)                 | 21.9 (18.1–26.7)         | -33.2% (-38.9 to -26.9%)            | 0.99                     |
|              |       | Iran                         | 19.8 (16.1–24.1)          | -16% (-25.5 to -2.6%)               | 25.8 (21.1–31)           | -23.5% (-29.3 to -17.2%)            | 2.00                     |
|              |       | Iraq                         | 9.4 (7.8–11.1)            | 5.8% (-5.5 to 17.5%)                | 22.9 (19.3–26.8)         | -40.2% (-44.8 to -36.1%)            | 0.99                     |
|              |       | Jordan                       | 3 (2.5–3.7)               | 128.8% (107.8 to 154.7%)            | 27.4 (22.5–33.1)         | -10.8% (-16.6 to -3.7%)             | 1.04                     |
|              |       | Kuwait                       | 0.7 (0.5–0.8)             | 64.1% (48.1 to 82.4%)               | 19.2 (15.6–23.2)         | -20.5% (-24.8 to -15.4%)            | 1.09                     |
|              |       | Lebanon                      | 1 (0.8–1.2)               | -2% (-12.5 to 9.9%)                 | 20 (16.5–23.7)           | -27.8% (-33 to -22.6%)              | 1.04                     |
|              |       | Libya                        | 1 (0.8–1.2)               | -27.8% (-37.6 to -15.7%)            | 17.7 (14.6–21.4)         | -34.7% (-40.1 to -28.9%)            | 1.06                     |
|              |       | Morocco                      | 7 (5.8–8.3)               | -41.1% (-46.9 to -35.1%)            | 22.1 (18.5–26.2)         | -45.9% (-49.8 to -41.6%)            | 0.93                     |
|              |       | Palestine                    | 0.9 (0.7–1.1)             | -1% (-12.7 to 12.1%)                | 18.6 (15.5–22.2)         | -44.1% (-48.5 to -39%)              | 1.03                     |
|              |       | Oman                         | 0.3 (0.2–0.3)             | -3.7% (-13.9 to 9.4%)               | 8.6 (7.1–10.4)           | -40.6% (-45.2 to -36.4%)            | 0.77                     |
|              |       | Qatar                        | 1.3 (1–1.6)               | 365.1% (306.3 to 439.9%)            | 56.3 (46.3–68.2)         | -17.5% (-22.9 to -12.5%)            | 1.05                     |
|              |       | Saudi Arabia                 | 4.4 (3.4–5.4)             | 12.6% (-0.7 to 29.9%)               | 17 (13.6–20.6)           | -33.5% (-39.9 to -26.1%)            | 1.12                     |
|              |       | Syrian Arab Republic         | 3 (2.5–3.6)               | -52.1% (-57.6 to -45.4%)            | 23.7 (19.9–27.8)         | -37.1% (-41.5 to -32.2%)            | 1.01                     |
|              |       | Tunisia                      | 2.3 (1.9–2.7)             | -10.2% (-19.6 to 0.7%)              | 21.8 (17.9–25.8)         | -21.8% (-27.9 to -16.3%)            | 1.12                     |
|              |       | Türkiye                      | 4.6 (3.8–5.4)             | -60.2% (-65.5 to -53.4%)            | 6.7 (5.5–8)              | -63.2% (-66.9 to -59.1%)            | 0.77                     |
|              |       | United Arab Emirates         | 1.2 (1–1.5)               | 126% (94.5 to 165.4%)               | 28.2 (24.1–33)           | -36% (-40.1 to -31.9%)              | 1.13                     |
|              |       | Yemen                        | 7.7 (6.3–9.4)             | 15.2% (3.4 to 29.5%)                | 23.5 (20–27.6)           | -34.6% (-39.3 to -29.3%)            | 0.96                     |
|              |       | Afghanistan                  | 25.2 (21.8–28.9)          | 75.6% (64.8 to 88.3%)               | 86.2 (76.3–96.4)         | -35.7% (-38.3 to -32.9%)            | 1.07                     |
|              |       | Sudan                        | 6 (4.9–7.2)               | -60.6% (-63.9 to -57.1%)            | 14 (11.9–16.4)           | -74.4% (-75.9 to -72.6%)            | 0.92                     |
| Encephalitis |       | Global                       | 1444.7 (1280.1–1614.9)    | 12.5% (8.1 to 17.1%)                | 19.3 (17.1–21.7)         | -16.5% (-17.8 to -15.2%)            | 0.92                     |
|              |       | North Africa and Middle East | 58.1 (49.8–67)            | 46.2% (40.2 to 53.3%)               | 9.9 (8.5–11.3)           | -4.4% (-5.8 to -3%)                 | 1.21                     |
|              |       | Algeria                      | 3.4 (2.9–4)               | 39.9% (30.1 to 49.8%)               | 8.4 (7.2–9.7)            | -2.4% (-6.5 to 1.9%)                | 1.15                     |
|              |       | Bahrain                      | 0.1 (0.1–0.1)             | 123.8% (102.1 to 145.6%)            | 8.2 (7–9.6)              | 0.5% (-3.8 to 4.8%)                 | 1.19                     |
|              |       | Egypt                        | 10 (8.5–11.8)             | 39.1% (31.4 to 47.1%)               | 10 (8.6–11.6)            | -10.6% (-15.2 to -5.9%)             | 1.12                     |
|              |       | Iran                         | 6.8 (5.8–7.8)             | 13.4% (5.7 to 22.6%)                | 8.7 (7.4–10.2)           | 1.1% (0 to 2.3%)                    | 1.16                     |
|              |       | Iraq                         | 4.6 (3.9–5.3)             | 76.6% (66.4 to 88.5%)               | 11.1 (9.6–12.7)          | -12.1% (-15.9 to -8%)               | 1.23                     |
|              |       | Jordan                       | 0.9 (0.8–1.1)             | 145.3% (130.3 to 162.4%)            | 8.2 (7–9.6)              | -5.4% (-9.3 to -0.7%)               | 1.17                     |
|              |       | Kuwait                       | 0.3 (0.3–0.4)             | 114.9% (98.8 to 132.8%)             | 8.3 (7.1–9.8)            | 0.6% (-4.3 to 5%)                   | 1.18                     |
|              |       | Lebanon                      | 0.6 (0.6–0.7)             | 31.4% (24.7 to 39.7%)               | 12.4 (10.9–14.1)         | -12.5% (-15.7 to -8.5%)             | 1.38                     |
|              |       | Libya                        | 0.4 (0.3–0.4)             | 13.8% (3.2 to 27%)                  | 6.3 (5.4–7.4)            | -1.2% (-5.3 to 2.9%)                | 1.12                     |
|              |       | Morocco                      | 2.9 (2.5–3.4)             | 18.3% (11.8 to 26%)                 | 8.6 (7.3–10)             | -2.8% (-6.8 to 1.4%)                | 1.23                     |
|              |       | Palestine                    | 0.4 (0.4–0.5)             | 100.1% (87.3 to 113.4%)             | 8.4 (7.1–9.8)            | -0.8% (-4.8 to 3.9%)                | 1.14                     |
|              |       | Oman                         | 0.6 (0.5–0.6)             | 50% (39.8 to 62%)                   | 15.8 (14.1–17.6)         | -21.3% (-24.5 to -17.7%)            | 0.88                     |
|              |       | Qatar                        | 0.2 (0.1–0.2)             | 394.9% (348.9 to 438.7%)            | 8.3 (7–9.6)              | -1.8% (-5.9 to 2.7%)                | 1.18                     |
|              |       | Saudi Arabia                 | 2.7 (2.3–3.1)             | 57% (40.6 to 73.5%)                 | 9.2 (7.9–10.7)           | -11% (-15.2 to -6.3%)               | 1.24                     |
|              |       | Syrian Arab Republic         | 1.2 (1–1.4)               | -17.5% (-24.6 to -8.8%)             | 8.6 (7.3–10.1)           | -6.9% (-11.2 to -2.6%)              | 1.16                     |
|              |       | Tunisia                      | 0.9 (0.8–1)               | 15.7% (6.9 to 26%)                  | 8.4 (7.1–9.8)            | -1.2% (-5.7 to 3.7%)                | 1.19                     |
|              |       | Türkiye                      | 8.1 (7–9.2)               | 11.8% (3.3 to 21.4%)                | 11.2 (9.6–13)            | -2.8% (-7.1 to 2%)                  | 1.23                     |
|              |       | United Arab Emirates         | 0.5 (0.4–0.6)             | 241.7% (200.6 to 288.3%)            | 8.4 (7.1–9.8)            | -0.6% (-5.8 to 4.5%)                | 1.15                     |
|              |       | Yemen                        | 2.9 (2.4–3.4)             | 89.1% (75.4 to 102.9%)              | 8.4 (7.2–9.8)            | -2% (-6.8 to 2.6%)                  | 1.15                     |
|              |       | Afghanistan                  | 7 (6.2–8)                 | 225.2% (209.5 to 242.2%)            | 19.4 (17.5–21.5)         | 0.1% (-3.8 to 4.2%)                 | 1.46                     |
|              |       | Sudan                        | 3.6 (3.4–3)               | 71.3% (59.9 to 82.7%)               | 8.3 (7–9.6)              | -3.4% (-7.6 to 0.9%)                | 1.17                     |
| Tetanus      |       | Global                       | 73.7 (53.3–101.1)         | -88% (-91.1 to -83.2%)              | 1 (0.7–1.4)              | -90% (-92.4 to -86.1%)              | 0.78                     |
|              |       | North Africa and Middle East | 1.9 (1.2–2.9)             | -83% (-90.6 to -68%)                | 0.3 (0.2–0.5)            | -88.4% (-92.9 to -79%)              | 0.82                     |

**Table S11** Cause- and sex-specific burden, mortality, incidence, and prevalence of neurological conditions in North Africa and Middle East countries

| Measure                                 | Cause | Location                     | All Ages                  |                                     | Age-standardised         |                                     | Sex ratio<br>2019<br>F:M |
|-----------------------------------------|-------|------------------------------|---------------------------|-------------------------------------|--------------------------|-------------------------------------|--------------------------|
|                                         |       |                              | Number (thousand)<br>2019 | Percent change<br>From 1990 to 2019 | Rate per 100,000<br>2019 | Percent change<br>From 1990 to 2019 |                          |
|                                         |       |                              | Mean (95% UI)             | Mean (95% UI)                       | Mean (95% UI)            | Mean (95% UI)                       |                          |
|                                         |       | Algeria                      | <0.1 (<0.1–<0.1)          | -75.3% (-90.4 to -33.4%)            | <0.1 (<0.1–0.1)          | -83.1% (-93 to -57.7%)              | 0.74                     |
|                                         |       | Bahrain                      | <0.1 (<0.1–<0.1)          | 71% (-23.8 to 170%)                 | <0.1 (<0.1–<0.1)         | -39.3% (-73.2 to -5.8%)             | 0.93                     |
|                                         |       | Egypt                        | 0.2 (0.1–0.6)             | -82.7% (-94.1 to -48.7%)            | 0.3 (0.1–0.7)            | -88.5% (-95.1 to -67.3%)            | 0.76                     |
|                                         |       | Iran                         | <0.1 (<0.1–<0.1)          | -90.7% (-96.2 to -72.8%)            | <0.1 (<0.1–0.1)          | -91.7% (-96.3 to -79.4%)            | 0.69                     |
|                                         |       | Iraq                         | <0.1 (<0.1–0.1)           | -89.1% (-96.5 to -53.5%)            | 0.1 (0.1–0.2)            | -92.2% (-97.2 to -72.2%)            | 0.43                     |
|                                         |       | Jordan                       | <0.1 (<0.1–<0.1)          | -58.9% (-81.7 to 18.5%)             | <0.1 (<0.1–<0.1)         | -80.1% (-90.8 to -53.3%)            | 0.79                     |
|                                         |       | Kuwait                       | <0.1 (<0.1–<0.1)          | 92% (-77.1 to 609.3%)               | <0.1 (<0.1–<0.1)         | -60.9% (-93.8 to -5.7%)             | 0.04                     |
|                                         |       | Lebanon                      | <0.1 (<0.1–0.1)           | -51% (-90.3 to 59.8%)               | 0.7 (0.2–2.9)            | -78.6% (-95.3 to -30.4%)            | 0.77                     |
|                                         |       | Libya                        | <0.1 (<0.1–<0.1)          | -54.9% (-82.9 to 11.7%)             | <0.1 (<0.1–0.1)          | -67.1% (-88.8 to -23.8%)            | 0.69                     |
|                                         |       | Morocco                      | 0.2 (0–0.6)               | -93.2% (-98.3 to -75.6%)            | 0.6 (0.1–1.9)            | -92.1% (-97.9 to -74%)              | 0.7                      |
|                                         |       | Palestine                    | <0.1 (<0.1–<0.1)          | -87% (-96.4 to -40%)                | <0.1 (<0.1–0.1)          | -89.7% (-96.9 to -64.2%)            | 0.69                     |
|                                         |       | Oman                         | <0.1 (<0.1–<0.1)          | -75.2% (-91.2 to -7.3%)             | <0.1 (<0.1–0.1)          | -92.1% (-98.5 to -53.2%)            | 0.47                     |
|                                         |       | Qatar                        | <0.1 (<0.1–<0.1)          | 246.7% (18.5 to 553.5%)             | <0.1 (<0.1–<0.1)         | -47.2% (-84.6 to 40.9%)             | 0.73                     |
|                                         |       | Saudi Arabia                 | <0.1 (<0.1–<0.1)          | -90.3% (-98.7 to -46.9%)            | 0.1 (0–0.1)              | -95% (-99.1 to -69.9%)              | 0.59                     |
|                                         |       | Syrian Arab Republic         | <0.1 (<0.1–<0.1)          | -96% (-98.8 to -84.9%)              | 0.1 (0–0.1)              | -93% (-97.7 to -76.5%)              | 0.52                     |
|                                         |       | Tunisia                      | <0.1 (<0.1–<0.1)          | -73.4% (-89.8 to -33.3%)            | <0.1 (<0.1–0.1)          | -78.8% (-92.1 to -47%)              | 0.74                     |
|                                         |       | Türkiye                      | <0.1 (<0.1–<0.1)          | -97.5% (-98.5 to -93.3%)            | <0.1 (<0.1–<0.1)         | -98.5% (-99.2 to -95.5%)            | 0.8                      |
|                                         |       | United Arab Emirates         | <0.1 (<0.1–0.1)           | 3.7% (-77.7 to 292%)                | 2.9 (0.4–5.3)            | -85.1% (-95.9 to -34.4%)            | 1.75                     |
|                                         |       | Yemen                        | 0.1 (0–0.2)               | -82.3% (-94.2 to -29.8%)            | 0.3 (0.2–0.7)            | -87% (-94.8 to -58.9%)              | 0.47                     |
|                                         |       | Afghanistan                  | 1.1 (0.6–1.9)             | -71.2% (-85.3 to -40%)              | 3.4 (2–5.2)              | -86.8% (-92.3 to -75.7%)            | 1.00                     |
|                                         |       | Sudan                        | 0.1 (0–0.1)               | -91% (-96.5 to -75.3%)              | 0.2 (0.1–0.4)            | -92.6% (-96.8 to -84.1%)            | 0.47                     |
| Brain and central nervous system cancer |       | Global                       | 348 (262.1–388.9)         | 94.4% (22 to 128.3%)                | 4.3 (3.3–4.9)            | 13.8% (-27.3 to 32.8%)              | 0.8                      |
|                                         |       | North Africa and Middle East | 27.5 (18.6–32.6)          | 152.5% (49.6 to 233.1%)             | 5.2 (3.5–6.1)            | 28% (-19.6 to 63.3%)                | 0.84                     |
|                                         |       | Algeria                      | 0.9 (0.6–1.2)             | 136.7% (28.9 to 225.3%)             | 2.3 (1.5–2.9)            | 28% (-30.1 to 75.1%)                | 0.94                     |
|                                         |       | Bahrain                      | <0.1 (<0.1–0.1)           | 358% (177.2 to 552.5%)              | 3.6 (2.4–4.6)            | 9.6% (-34.1 to 55.8%)               | 0.79                     |
|                                         |       | Egypt                        | 2.9 (2–4.1)               | 128.8% (34.3 to 228%)               | 3.5 (2.4–5.1)            | 20.9% (-22.4 to 69.8%)              | 0.82                     |
|                                         |       | Iran                         | 5.8 (2.9–7)               | 130.3% (23.4 to 189.2%)             | 7.3 (3.7–8.8)            | 29.6% (-25.3 to 57.5%)              | 0.86                     |
|                                         |       | Iraq                         | 2.8 (2–3.6)               | 264% (85.4 to 481.7%)               | 8.5 (6.3–10.9)           | 45.7% (-22 to 125%)                 | 0.96                     |
|                                         |       | Jordan                       | 0.4 (0.3–0.5)             | 377.4% (199.9 to 546.7%)            | 4.4 (3.1–5.4)            | 26% (-21.9 to 71.5%)                | 0.88                     |
|                                         |       | Kuwait                       | 0.1 (0.1–0.2)             | 300.1% (144.2 to 423.9%)            | 4 (2.8–5)                | 44.3% (-12.5 to 86.6%)              | 0.61                     |
|                                         |       | Lebanon                      | 0.4 (0.3–0.4)             | 195% (101.3 to 302.7%)              | 6.7 (4.8–8.6)            | 56.4% (6.3 to 111.2%)               | 0.75                     |
|                                         |       | Libya                        | 0.3 (0.2–0.4)             | 130.5% (60.2 to 239.2%)             | 5.2 (3.9–6.8)            | 15.6% (-17.6 to 64.1%)              | 0.61                     |
|                                         |       | Morocco                      | 0.6 (0.4–0.9)             | 101.7% (22.8 to 189.8%)             | 1.8 (1.3–2.4)            | 19.5% (-22.3 to 67.3%)              | 1.28                     |
|                                         |       | Palestine                    | 0.3 (0.2–0.4)             | 175.7% (74 to 272.6%)               | 9.4 (7.1–11.2)           | 9.9% (-27.2 to 49%)                 | 0.78                     |
|                                         |       | Oman                         | 0.1 (0.1–0.2)             | 343.4% (121 to 582.6%)              | 3.7 (2.3–4.7)            | 69.9% (-13.9 to 153.1%)             | 0.9                      |
|                                         |       | Qatar                        | 0.1 (0.1–0.2)             | 982.3% (534.6 to 1563%)             | 5.3 (3.8–7.6)            | 36.2% (-15.7 to 100%)               | 1.17                     |
|                                         |       | Saudi Arabia                 | 1.3 (0.9–2)               | 625.3% (283.3 to 1290.8%)           | 4.1 (3.1–6.2)            | 136% (25.5 to 341.7%)               | 0.99                     |
|                                         |       | Syrian Arab Republic         | 0.8 (0.6–1.1)             | 94.4% (18.5 to 193.9%)              | 6.1 (4.3–8.1)            | 19.5% (-19.3 to 76.6%)              | 0.82                     |
|                                         |       | Tunisia                      | 0.2 (0.2–0.3)             | 132.6% (41.8 to 241.1%)             | 1.9 (1.3–2.6)            | 39.4% (-12.3 to 103.2%)             | 1.14                     |
|                                         |       | Türkiye                      | 6.4 (3–8.8)               | 120.2% (21.9 to 234.3%)             | 7.6 (3.7–10.3)           | 25.9% (-26.3 to 82.2%)              | 0.75                     |
|                                         |       | United Arab Emirates         | 0.5 (0.3–0.7)             | 641.7% (380.4 to 976.5%)            | 5.7 (3.5–7.8)            | 8.7% (-35.1 to 65.6%)               | 0.78                     |
|                                         |       | Yemen                        | 0.8 (0.5–1.2)             | 177.9% (48.6 to 409.1%)             | 3.9 (2.4–5.7)            | 26.2% (-26.8 to 104.5%)             | 0.73                     |
|                                         |       | Afghanistan                  | 1.3 (0.7–2.3)             | 152% (64 to 330.3%)                 | 5.1 (3.9–3)              | 2.3% (-33.1 to 60.9%)               | 0.78                     |
|                                         |       | Sudan                        | 1.4 (0.8–2)               | 111% (2.4 to 346.1%)                | 4.4 (2.6–6.2)            | 16.6% (-35.3 to 106.5%)             | 0.69                     |
| Stroke*                                 |       | Global                       | 12224.6 (11041.8–13589.3) | 70.1% (66.6 to 73.4%)               | 150.8 (136.5–167.5)      | -16.9% (-18.4 to -15.3%)            | 0.99                     |
|                                         |       | North Africa and Middle East | 829.8 (758.4–912.8)       | 130.7% (124.4 to 137.7%)            | 183 (166.7–201.7)        | -5.4% (-7.4 to -3.3%)               | 1.13                     |
|                                         |       | Algeria                      | 61.1 (55.1–67.9)          | 118.1% (106.4 to 132%)              | 181.7 (164.3–202.2)      | -16.9% (-21.1 to -12.3%)            | 1.15                     |
|                                         |       | Bahrain                      | 1.2 (1.1–1.4)             | 240.4% (215.8 to 266.4%)            | 113.4 (102.3–126.6)      | -32.8% (-36.8 to -28.7%)            | 1.26                     |



**Table S11** Cause- and sex-specific burden, mortality, incidence, and prevalence of neurological conditions in North Africa and Middle East countries

| Measure                   | Cause                        | Location             | All Ages                  |                                     | Age-standardised         |                                     | Sex ratio<br>2019<br>F:M |
|---------------------------|------------------------------|----------------------|---------------------------|-------------------------------------|--------------------------|-------------------------------------|--------------------------|
|                           |                              |                      | Number (thousand)<br>2019 | Percent change<br>From 1990 to 2019 | Rate per 100,000<br>2019 | Percent change<br>From 1990 to 2019 |                          |
|                           |                              |                      | Mean (95% UI)             | Mean (95% UI)                       | Mean (95% UI)            | Mean (95% UI)                       |                          |
|                           |                              | Egypt                | 152.7 (136.4–170.2)       | 138.9% (124.4 to 155.3%)            | 228.4 (205–255.3)        | 9.6% (3.5 to 16.5%)                 | 1.3                      |
|                           |                              | Iran                 | 102.8 (90.1–117.8)        | 112.9% (103.9 to 123.9%)            | 138.8 (121.8–159.6)      | -16.7% (-18.1 to -15.1%)            | 1.07                     |
|                           |                              | Iraq                 | 60.4 (54.9–66.1)          | 153.6% (141.4 to 166.3%)            | 241.6 (216.9–267)        | -11.7% (-16.4 to -6.7%)             | 1.1                      |
|                           |                              | Jordan               | 15.5 (13.8–17.3)          | 238% (216.8 to 261.6%)              | 225.9 (200.5–253.4)      | -26.2% (-30.9 to -20.8%)            | 1.11                     |
|                           |                              | Kuwait               | 4 (3.6–4.5)               | 270.9% (249.2 to 294.7%)            | 125.8 (113.7–140.4)      | -2.7% (-8.2 to 3.3%)                | 0.86                     |
|                           |                              | Lebanon              | 7.8 (7–8.7)               | 112% (99.5 to 126.2%)               | 150.5 (135.7–167.8)      | -5.3% (-9.9 to 0.3%)                | 1.36                     |
|                           |                              | Libya                | 9.4 (8.5–10.4)            | 180.8% (162.4 to 200.3%)            | 170.9 (153.6–190.3)      | 7.9% (2.1 to 14.6%)                 | 1.5                      |
|                           |                              | Morocco              | 63.7 (57.1–70.8)          | 106.6% (93.9 to 120.9%)             | 199.8 (179.8–222)        | -4.4% (-9.8 to 1.5%)                | 1.2                      |
|                           |                              | Palestine            | 4.7 (4.3–5.3)             | 143.1% (127.3 to 157.8%)            | 189.7 (170.1–212.2)      | -7.6% (-13.7 to -1.7%)              | 1.18                     |
|                           |                              | Oman                 | 3.7 (3.3–4.2)             | 125.4% (112.1 to 138.6%)            | 196.2 (174.8–222.1)      | -10.3% (-15.9 to -4.6%)             | 1.00                     |
|                           |                              | Qatar                | 1.9 (1.7–2.2)             | 487.3% (447.3 to 527.8%)            | 127.1 (114.7–141.6)      | -26.1% (-30.3 to -21.7%)            | 1.3                      |
|                           |                              | Saudi Arabia         | 41.1 (37.4–45.2)          | 254.9% (234 to 278.8%)              | 193.9 (176.5–213.7)      | 11.9% (6.7 to 18%)                  | 1.14                     |
|                           |                              | Syrian Arab Republic | 22.2 (20.2–24.4)          | 61.4% (53.1 to 70.1%)               | 179.3 (164–196.4)        | -18.6% (-22.5 to -14.7%)            | 1.08                     |
|                           |                              | Tunisia              | 19.7 (17.6–22.1)          | 136.2% (122.1 to 151.7%)            | 159.6 (144–178.9)        | -1.2% (-6.6 to 4.3%)                | 1.13                     |
|                           |                              | Türkiye              | 125.3 (114.5–138.1)       | 117.4% (106.2 to 130.1%)            | 145.6 (133.4–160.7)      | -2.8% (-7.6 to 1.9%)                | 1.06                     |
|                           |                              | United Arab Emirates | 14.5 (12.8–16.5)          | 710.5% (643.9 to 778.5%)            | 262.2 (233.8–294.3)      | -14.8% (-19.2 to -9.9%)             | 1.15                     |
|                           |                              | Yemen                | 32.1 (29.3–35)            | 145.9% (134.6 to 157.8%)            | 207.9 (190.1–228.3)      | -9.5% (-14 to -4.7%)                | 1.12                     |
|                           |                              | Afghanistan          | 36.8 (33.6–40.3)          | 111.8% (99.3 to 123.9%)             | 217.7 (200.8–238.5)      | -7.7% (-11.8 to -3.2%)              | 1.11                     |
|                           |                              | Sudan                | 48.6 (44.3–53.8)          | 101% (91 to 112.3%)                 | 227.1 (205–253.2)        | -4.8% (-9.7 to 0.9%)                | 1.22                     |
| Ischaemic stroke          | Global                       |                      | 7630.8 (6569.2–8960.4)    | 87.6% (83.5 to 91.7%)               | 94.5 (81.9–110.8)        | -10% (-12 to -8%)                   | 1.07                     |
|                           | North Africa and Middle East |                      | 602.5 (531.3–682.5)       | 166.9% (157.2 to 177.2%)            | 135.5 (119.7–153.6)      | 8.8% (6.3 to 11.4%)                 | 1.16                     |
|                           |                              | Algeria              | 46.6 (40.7–53.3)          | 161.6% (142.6 to 182.8%)            | 140.1 (122.9–160.1)      | -1.4% (-7.3 to 5.6%)                | 1.17                     |
|                           |                              | Bahrain              | 0.9 (0.7–1)               | 261.5% (226.2 to 300.9%)            | 82 (71.4–94.5)           | -30.1% (-35.1 to -24.2%)            | 1.26                     |
|                           |                              | Egypt                | 116.4 (100.5–133.8)       | 200.2% (176.1 to 227.7%)            | 176.6 (153.4–202.3)      | 35.8% (25.7 to 46%)                 | 1.32                     |
|                           |                              | Iran                 | 82.5 (69.4–97.6)          | 122.7% (111.2 to 136.5%)            | 112.3 (94.7–133.4)       | -14.2% (-16 to -12.5%)              | 1.1                      |
|                           |                              | Iraq                 | 42.4 (36.9–48)            | 168.6% (150.2 to 187.7%)            | 178.1 (154–203.1)        | -5% (-11.7 to 2.3%)                 | 1.19                     |
|                           |                              | Jordan               | 12 (10.4–13.8)            | 245.7% (218.2 to 275.8%)            | 181.4 (156.6–208.7)      | -24.9% (-30.9 to -18.1%)            | 1.12                     |
|                           |                              | Kuwait               | 2.7 (2.4–3.2)             | 271.6% (243 to 304.6%)              | 91.5 (79.6–105.3)        | -4% (-10.7 to 4.2%)                 | 0.86                     |
|                           |                              | Lebanon              | 6.2 (5.4–7)               | 143.8% (126.1 to 164.3%)            | 119 (104.1–135.6)        | 7.9% (1.1 to 15.5%)                 | 1.39                     |
|                           |                              | Libya                | 7.2 (6.3–8.2)             | 230.5% (201.8 to 261.7%)            | 133.9 (117–152.9)        | 25.3% (16.7 to 34.8%)               | 1.55                     |
|                           |                              | Morocco              | 48.4 (42–55.5)            | 152.2% (130.5 to 175.1%)            | 152.9 (132.9–174.8)      | 14.9% (5.8 to 23.9%)                | 1.24                     |
|                           |                              | Palestine            | 3.6 (3.2–4.2)             | 164% (142.7 to 185.3%)              | 149.6 (130–172.4)        | 2.5% (-5.9 to 11.2%)                | 1.21                     |
|                           |                              | Oman                 | 2.7 (2.3–3.1)             | 156.8% (136.8 to 175.9%)            | 148.9 (128.2–173.3)      | 3.3% (-4.6 to 11.8%)                | 0.87                     |
|                           |                              | Qatar                | 1.2 (0.9–1.4)             | 515.8% (455.6 to 575.7%)            | 87.5 (75.7–101.9)        | -24.8% (-30.6 to -18.4%)            | 1.33                     |
|                           |                              | Saudi Arabia         | 28.1 (24.7–32)            | 280.6% (248.3 to 315.6%)            | 140.4 (123.8–159.3)      | 20.7% (12.7 to 29.8%)               | 1.18                     |
|                           |                              | Syrian Arab Republic | 14.8 (12.9–17)            | 85.1% (70.9 to 99.2%)               | 120.3 (105.4–136.8)      | -9.9% (-16.4 to -3.4%)              | 1.15                     |
|                           |                              | Tunisia              | 15.2 (13.2–17.7)          | 180.6% (159.2 to 204%)              | 123.4 (108.1–142.9)      | 15.9% (7.6 to 23.8%)                | 1.15                     |
|                           |                              | Türkiye              | 81.6 (71.5–93.6)          | 138.2% (120 to 158.2%)              | 95.4 (83.8–109.5)        | 4.7% (-3 to 12.8%)                  | 1.1                      |
|                           |                              | United Arab Emirates | 10.9 (9.3–12.8)           | 847.6% (743.8 to 952.1%)            | 208.2 (180.3–240.9)      | -5% (-11.4 to 2.3%)                 | 1.18                     |
|                           |                              | Yemen                | 21.9 (19.2–24.8)          | 216.3% (194.7 to 239.4%)            | 147.6 (129.8–168.3)      | 17.1% (9.1 to 25.7%)                | 1.15                     |
|                           |                              | Afghanistan          | 22.2 (19.4–25.6)          | 154.7% (130.9 to 180.7%)            | 140.3 (123.4–159.4)      | 18.9% (10.7 to 27.7%)               | 1.09                     |
|                           |                              | Sudan                | 34.5 (30.2–39.6)          | 157.6% (139.6 to 178.8%)            | 166.7 (145–190.9)        | 22.7% (14.3 to 32.1%)               | 1.25                     |
| Intracerebral haemorrhage | Global                       |                      | 3409.1 (2970.5–3909.2)    | 43.2% (40.7 to 45.5%)               | 41.8 (36.5–47.9)         | -29.2% (-30.5 to -27.8%)            | 0.78                     |
|                           | North Africa and Middle East |                      | 163.2 (149.2–179.8)       | 65.1% (60.7 to 69.7%)               | 35 (31.8–38.6)           | -32.6% (-34.5 to -30.6%)            | 1.00                     |
|                           |                              | Algeria              | 9.8 (8.7–10.9)            | 30.1% (22 to 38%)                   | 29.1 (25.8–32.5)         | -49.8% (-53.1 to -46.8%)            | 1.06                     |
|                           |                              | Bahrain              | 0.2 (0.2–0.3)             | 145.9% (125.7 to 167.4%)            | 21.8 (19.3–24.6)         | -46.4% (-50.1 to -43%)              | 1.24                     |
|                           |                              | Egypt                | 27.1 (24.4–30.2)          | 43.3% (34.7 to 52.5%)               | 39.6 (35.9–44.1)         | -34.6% (-38.2 to -30.4%)            | 1.17                     |

**Table S11** Cause- and sex-specific burden, mortality, incidence, and prevalence of neurological conditions in North Africa and Middle East countries

| Measure                  |                              | All Ages                     |                                     | Age-standardised         |                                     | Sex ratio |
|--------------------------|------------------------------|------------------------------|-------------------------------------|--------------------------|-------------------------------------|-----------|
|                          |                              | Number (thousand)<br>2019    | Percent change<br>From 1990 to 2019 | Rate per 100,000<br>2019 | Percent change<br>From 1990 to 2019 |           |
| Cause                    | Location                     | Mean (95% UI)                | Mean (95% UI)                       | Mean (95% UI)            | Mean (95% UI)                       | F:M       |
|                          | Iran                         | 12.8 (10.8–15.1)             | 68.6% (58.3 to 79.7%)               | 17.3 (14.6–20.6)         | -28% (-30.2 to -25.5%)              | 0.86      |
|                          | Iraq                         | 14.7 (13.5–16)               | 132.8% (122.2 to 146.8%)            | 52.7 (48.2–57.9)         | -22.7% (-26.6 to -18.3%)            | 0.83      |
|                          | Jordan                       | 2.2 (1.9–2.5)                | 166.1% (147.1 to 186%)              | 30.2 (26.9–34)           | -39.6% (-43.5 to -35%)              | 0.94      |
|                          | Kuwait                       | 0.7 (0.6–0.8)                | 256.5% (228.2 to 284.7%)            | 21.4 (19.2–24.2)         | -0.5% (-7.4 to 7%)                  | 0.64      |
|                          | Lebanon                      | 1 (0.9–1.1)                  | 24.9% (16.6 to 33.8%)               | 19 (16.9–21.4)           | -43.7% (-47.2 to -40.1%)            | 1.28      |
|                          | Libya                        | 1.4 (1.3–1.6)                | 74.6% (64.1 to 86%)                 | 25.3 (22.6–28.3)         | -31.6% (-35.3 to -27.9%)            | 1.33      |
|                          | Morocco                      | 10.8 (9.7–12.1)              | 27.4% (20.2 to 35.1%)               | 33.7 (30.3–37.7)         | -40% (-43.3 to -36.3%)              | 1.02      |
|                          | Palestine                    | 0.7 (0.7–0.8)                | 66.5% (55.8 to 78.5%)               | 28.3 (25.8–31.3)         | -38.8% (-42.9 to -34.8%)            | 0.95      |
|                          | Oman                         | 0.7 (0.6–0.8)                | 50.9% (40.6 to 63.9%)               | 35.3 (31.4–39.6)         | -39.3% (-43.1 to -35.4%)            | 1.6       |
|                          | Qatar                        | 0.4 (0.3–0.5)                | 380.1% (337.6 to 438.3%)            | 24.5 (21.9–27.6)         | -34% (-38.3 to -29.3%)              | 1.16      |
|                          | Saudi Arabia                 | 9.7 (8.9–10.6)               | 204% (184.5 to 224.3%)              | 42.8 (38.9–47.5)         | -6% (-11.1 to -0.8%)                | 0.99      |
|                          | Syrian Arab Republic         | 5.7 (5.2–6.3)                | 22.3% (15.6 to 30%)                 | 47.4 (43.3–52)           | -34% (-37.8 to -30.4%)              | 0.89      |
|                          | Tunisia                      | 2.9 (2.5–3.3)                | 47.1% (37.3 to 56.5%)               | 23.9 (21.1–27.3)         | -37.5% (-41.4 to -33.6%)            | 0.98      |
|                          | Türkiye                      | 30 (26.9–33.5)               | 93.1% (79.1 to 107.3%)              | 35.1 (31.4–39.1)         | -12.4% (-18.3 to -6.4%)             | 0.92      |
|                          | United Arab Emirates         | 2.6 (2.3–2.9)                | 432.8% (394.6 to 479.2%)            | 42.3 (38.1–47)           | -41.9% (-45.3 to -38.6%)            | 0.94      |
|                          | Yemen                        | 7.4 (6.8–8.2)                | 55.2% (47.8 to 62.4%)               | 44.7 (40.7–48.8)         | -45.8% (-48.6 to -42.9%)            | 0.96      |
|                          | Afghanistan                  | 11.7 (10.7–12.8)             | 63.2% (53.8 to 73.7%)               | 61 (56–66.3)             | -37.6% (-40.2 to -34.7%)            | 1.11      |
|                          | Sudan                        | 10.6 (9.6–11.6)              | 24.2% (17.5 to 30.6%)               | 45.8 (41.6–50.2)         | -44.3% (-47.4 to -41.5%)            | 1.12      |
| Subarachnoid haemorrhage | Global                       | 1184.6 (1005.9–1390.4)       | 60.7% (56.5 to 64.7%)               | 14.5 (12.3–16.9)         | -16.9% (-18.8 to -15.3%)            | 1.21      |
|                          | North Africa and Middle East | 64.1 (54.6–75.6)             | 82.9% (75.3 to 92.5%)               | 12.5 (10.7–14.7)         | -26.4% (-29.2 to -23.3%)            | 1.24      |
|                          | Algeria                      | 4.7 (4.5–6)                  | 76.1% (61 to 91.9%)                 | 12.5 (10.6–14.6)         | -33% (-38.1 to -27.6%)              | 1.2       |
|                          | Bahrain                      | 0.2 (0.1–0.2)                | 354.7% (294.1 to 430.2%)            | 9.6 (7.9–11.9)           | -11.1% (-19.6 to 0.8%)              | 1.32      |
|                          | Egypt                        | 9.2 (7.9–10.9)               | 47.8% (37.6 to 59.3%)               | 12.2 (10.5–14.3)         | -31.6% (-36.3 to -26.4%)            | 1.35      |
|                          | Iran                         | 7.5 (6.2–9.2)                | 106% (93.3 to 120%)                 | 9.2 (7.6–11.1)           | -20.9% (-23.4 to -17.9%)            | 1.21      |
|                          | Iraq                         | 3.2 (2.7–3.8)                | 90.7% (72.6 to 109.4%)              | 10.8 (9.1–12.8)          | -40.3% (-45.7 to -34.7%)            | 1.26      |
|                          | Jordan                       | 1.3 (1.1–1.6)                | 350.1% (300.9 to 401.4%)            | 14.3 (11.7–17.6)         | -2.3% (-12.5 to 7.5%)               | 1.3       |
|                          | Kuwait                       | 0.6 (0.4–0.7)                | 287.1% (244.6 to 338.5%)            | 12.9 (10.5–16.2)         | 3.1% (-6.4 to 15.2%)                | 1.35      |
|                          | Lebanon                      | 0.7 (0.5–0.8)                | 79.6% (58.5 to 103%)                | 12.5 (10.2–15.7)         | -15.3% (-24.8 to -4.5%)             | 1.25      |
|                          | Libya                        | 0.7 (0.6–0.9)                | 119.8% (99.5 to 144.3%)             | 11.7 (9.8–14)            | -19.8% (-26.1 to -12.7%)            | 1.32      |
|                          | Morocco                      | 4.5 (3.8–5.3)                | 42.4% (32.8 to 53.1%)               | 13.3 (11.3–15.4)         | -32.8% (-37.3 to -28.1%)            | 1.28      |
|                          | Palestine                    | 0.4 (0.3–0.5)                | 176.1% (152.5 to 205.6%)            | 11.8 (9.8–14.6)          | -9.4% (-16.3 to -0.8%)              | 1.33      |
|                          | Oman                         | 0.4 (0.3–0.5)                | 127.6% (104 to 153.5%)              | 12 (10.1–14.2)           | -26.9% (-32.7 to -21.1%)            | 1.35      |
|                          | Qatar                        | 0.3 (0.3–0.4)                | 548.7% (485 to 610.3%)              | 15.1 (12.9–17.5)         | -18.7% (-25.3 to -13%)              | 1.33      |
|                          | Saudi Arabia                 | 3.3 (2.7–4.1)                | 227.3% (196.2 to 266.1%)            | 10.7 (8.8–13.3)          | -5.9% (-13.1 to 4.2%)               | 1.27      |
|                          | Syrian Arab Republic         | 1.6 (1.3–1.9)                | 55.3% (40.2 to 72.7%)               | 11.6 (9.8–14)            | -22.3% (-28.4 to -15.2%)            | 1.18      |
|                          | Tunisia                      | 1.6 (1.3–1.9)                | 67% (54.7 to 81.4%)                 | 12.3 (10.3–14.7)         | -26.8% (-31.7 to -20.9%)            | 1.29      |
|                          | Türkiye                      | 13.7 (11.9–15.9)             | 74.8% (62.2 to 88.6%)               | 15.1 (13.1–17.4)         | -18.8% (-24.8 to -12.2%)            | 1.14      |
|                          | United Arab Emirates         | 1.1 (0.8–1.3)                | 562.9% (494.7 to 631.6%)            | 11.7 (9.9–13.7)          | -25.2% (-29.9 to -20.7%)            | 1.35      |
|                          | Yemen                        | 2.7 (2.3–3.1)                | 104.9% (90.7 to 122.2%)             | 15.5 (13.2–18.2)         | -26.3% (-31.3 to -20.2%)            | 1.27      |
|                          | Afghanistan                  | 2.9 (2.5–3.4)                | 93.4% (75.2 to 115.5%)              | 16.3 (13.8–19.3)         | -19.2% (-24 to -12.1%)              | 1.3       |
|                          | Sudan                        | 3.5 (3.4–1)                  | 54.4% (43.3 to 65.9%)               | 14.6 (12.5–17)           | -28.8% (-33.5 to -23.9%)            | 1.26      |
| Neurological disorders†* | Global                       | 805178.5 (725838.1–888847.4) | 49.1% (46.1 to 52.4%)               | 10259.5 (9223.2–11324.2) | -0.1% (-0.6 to 0.5%)                | 1.11      |
|                          | North Africa and Middle East | 61542.7 (54639.6–68418.4)    | 89.1% (82.4 to 95.8%)               | 10090.8 (9024.1–11159.3) | 0.8% (0 to 1.6%)                    | 1.07      |
|                          | Algeria                      | 4123.9 (3650.4–4589.5)       | 72.9% (64.3 to 81.9%)               | 9906.8 (8817.7–10981.7)  | -0.1% (-0.6 to 0.4%)                | 1.07      |
|                          | Bahrain                      | 149 (131.2–167.7)            | 201.1% (179.3 to 223.1%)            | 9902.6 (8826.1–10988.3)  | -0.1% (-0.7 to 0.5%)                | 1.07      |



**Table S11** Cause- and sex-specific burden, mortality, incidence, and prevalence of neurological conditions in North Africa and Middle East countries

| Measure                                 | Cause                        | Location             | All Ages                  |                                     | Age-standardised          |                                     | Sex ratio<br>2019<br>F:M |
|-----------------------------------------|------------------------------|----------------------|---------------------------|-------------------------------------|---------------------------|-------------------------------------|--------------------------|
|                                         |                              |                      | Number (thousand)<br>2019 | Percent change<br>From 1990 to 2019 | Rate per 100,000<br>2019  | Percent change<br>From 1990 to 2019 |                          |
|                                         |                              |                      | Mean (95% UI)             | Mean (95% UI)                       | Mean (95% UI)             | Mean (95% UI)                       |                          |
|                                         |                              | Egypt                | 10069·8 (8899·2–11220·2)  | 88·4% (81·1 to 96·2%)               | 10257·3 (9189·4–11341·2)  | 1·1% (-2·1 to 4·8%)                 | 1·08                     |
|                                         |                              | Iran                 | 9645·9 (8632·3–10716·6)   | 62·8% (52·2 to 72·8%)               | 11293·3 (10132·6–12499·6) | 4·5% (1·6 to 6·9%)                  | 1·06                     |
|                                         |                              | Iraq                 | 4137·8 (3642·8–4637)      | 159·3% (151·1 to 167·8%)            | 9902·6 (8818·8–10985·9)   | 0% (-0·5 to 0·5%)                   | 1·07                     |
|                                         |                              | Jordan               | 1148·7 (1012·6–1286·1)    | 230% (218·2 to 242·7%)              | 9888·5 (8805·2–10979·7)   | 0% (-0·4 to 0·5%)                   | 1·07                     |
|                                         |                              | Kuwait               | 451·9 (399·8–508·4)       | 162·4% (148·6 to 176·8%)            | 9888·6 (8803·3–10919·9)   | -0·1% (-2·6 to 2·5%)                | 1·08                     |
|                                         |                              | Lebanon              | 514·3 (459·3–572·6)       | 68·3% (61·8 to 74·7%)               | 9912·9 (8824·5–10995·6)   | 0·2% (-0·4 to 0·7%)                 | 1·07                     |
|                                         |                              | Libya                | 694·2 (614·9–775)         | 77·3% (66·9 to 88·3%)               | 9902·4 (8808·5–10993·8)   | 0% (-0·4 to 0·5%)                   | 1·07                     |
|                                         |                              | Morocco              | 3608·8 (3200·6–4010·2)    | 50% (44·6 to 55·5%)                 | 9904·2 (8826·3–10974·4)   | 0% (-0·5 to 0·5%)                   | 1·07                     |
|                                         |                              | Palestine            | 478·4 (419·8–539·4)       | 161·1% (155·1 to 167·9%)            | 9904·4 (8818·6–11008·6)   | -0·1% (-0·6 to 0·4%)                | 1·07                     |
|                                         |                              | Oman                 | 462·9 (402·1–528·3)       | 157·7% (141 to 173·5%)              | 9864·6 (8795·8–10966·6)   | 0% (-0·5 to 0·5%)                   | 1·07                     |
|                                         |                              | Qatar                | 297·6 (254·9–343·2)       | 581·2% (557·6 to 604·4%)            | 9777·4 (8710·9–10885·3)   | -0·5% (-1·1 to 0%)                  | 1·07                     |
|                                         |                              | Saudi Arabia         | 3568 (3139·3–4012·1)      | 144·8% (128·1 to 162·2%)            | 9582·1 (8516·5–10684·8)   | -0·8% (-3·4 to 2%)                  | 1·06                     |
|                                         |                              | Syrian Arab Republic | 1467·2 (1302·7–1640·9)    | 25·4% (18·6 to 32·1%)               | 9915 (8823·2–10985·6)     | 0·2% (-0·2 to 0·7%)                 | 1·07                     |
|                                         |                              | Tunisia              | 1171·3 (1049·6–1300)      | 45·3% (38·4 to 52·8%)               | 9908·4 (8818·4–10995·9)   | 0·1% (-0·3 to 0·6%)                 | 1·07                     |
|                                         |                              | Türkiye              | 8130·9 (7269–9079·5)      | 47·2% (39·6 to 54·4%)               | 9588·8 (8564·7–10698·3)   | 0·9% (-1·9 to 3·6%)                 | 1·08                     |
|                                         |                              | United Arab Emirates | 973·7 (829·2–1124·9)      | 435·9% (391·1 to 480·3%)            | 9865·6 (8796·4–10962·3)   | 0% (-0·7 to 0·6%)                   | 1·07                     |
|                                         |                              | Yemen                | 2994·1 (2628·3–3374·9)    | 150% (143·6 to 156·7%)              | 9895·4 (8807·4–10988·4)   | 0% (-0·4 to 0·4%)                   | 1·07                     |
|                                         |                              | Afghanistan          | 3489·7 (3052·2–3961·4)    | 238·5% (228·4 to 247·1%)            | 9901·9 (8816·5–10966·1)   | 0% (-0·5 to 0·6%)                   | 1·07                     |
|                                         |                              | Sudan                | 3902·3 (3426·3–4410·5)    | 114% (111·1 to 116·9%)              | 9879·3 (8797·9–10946·5)   | -0·1% (-0·6 to 0·3%)                | 1·07                     |
| Alzheimer's disease and other dementias | Global                       |                      | 7236·4 (6217·2–8232·7)    | 147·7% (142 to 153·6%)              | 95 (81·6–107·9)           | 1·5% (0·2 to 2·8%)                  | 1·24                     |
|                                         | North Africa and Middle East |                      | 361·2 (309·7–413·1)       | 177·5% (171·2 to 184·3%)            | 110·2 (93·9–125·6)        | 0·8% (-0·7 to 2·6%)                 | 1·09                     |
|                                         |                              | Algeria              | 28·2 (23·7–32·8)          | 222·4% (198·4 to 248%)              | 110 (93·8–126)            | -0·1% (-3·1 to 3·1%)                | 1·08                     |
|                                         |                              | Bahrain              | 0·6 (0·5–0·7)             | 450·2% (419·6 to 484%)              | 111·9 (96·1–128·1)        | 1·4% (-1·4 to 4·7%)                 | 1·08                     |
|                                         |                              | Egypt                | 44 (37·5–50·8)            | 117·7% (109·8 to 124·7%)            | 107·3 (91·6–122·8)        | 2·6% (-1·1 to 5·7%)                 | 1·09                     |
|                                         |                              | Iran                 | 67·9 (57·9–77·4)          | 291·5% (266·1 to 320·5%)            | 111·7 (95–127·3)          | 0·4% (-1·3 to 1·9%)                 | 1·08                     |
|                                         |                              | Iraq                 | 17·5 (14·9–20)            | 165·3% (156·4 to 175·8%)            | 108·8 (93·1–124·3)        | 2·2% (-0·6 to 5·3%)                 | 1·09                     |
|                                         |                              | Jordan               | 4·7 (4·5–5)               | 425·7% (403·9 to 446·7%)            | 107·9 (91·9–123·3)        | 1·8% (-1·3 to 4·8%)                 | 1·08                     |
|                                         |                              | Kuwait               | 2·1 (1·8–2·3)             | 391·7% (373·8 to 411·3%)            | 111·2 (95·4–127·1)        | 0·7% (-2·3 to 4%)                   | 1·1                      |
|                                         |                              | Lebanon              | 5·6 (4·8–6·5)             | 207·7% (191·4 to 222·2%)            | 110·6 (95·2–126·5)        | 1·6% (-1·8 to 4·7%)                 | 1·09                     |
|                                         |                              | Libya                | 4·4 (3·8–5)               | 168% (159·4 to 176·1%)              | 107·4 (90·9–122·9)        | -1·9% (-5 to 0·9%)                  | 1·08                     |
|                                         |                              | Morocco              | 25·6 (21·8–29·5)          | 140·2% (131 to 149·4%)              | 109·1 (92·7–124·8)        | -1% (-4·1 to 2·3%)                  | 1·08                     |
|                                         |                              | Palestine            | 1·8 (1·5–2)               | 136·8% (128·6 to 144·9%)            | 109·3 (93·5–124·8)        | 0·6% (-2·4 to 3·8%)                 | 1·07                     |
|                                         |                              | Oman                 | 1 (0·9–1·2)               | 144·6% (135·1 to 154%)              | 110·1 (93·9–125·2)        | -0·6% (-3·5 to 2·4%)                | 1·1                      |
|                                         |                              | Qatar                | 0·4 (0·4–0·5)             | 701·7% (645·5 to 764%)              | 109 (92·9–124·7)          | 2·5% (-1 to 6·3%)                   | 1·08                     |
|                                         |                              | Saudi Arabia         | 10·2 (8·9–11·7)           | 136·6% (124·3 to 151%)              | 108·1 (92–123·6)          | -1·3% (-4·3 to 1·9%)                | 1·1                      |

**Table S11** Cause- and sex-specific burden, mortality, incidence, and prevalence of neurological conditions in North Africa and Middle East countries

| Measure             | Cause | Location                     | All Ages                  |                                     | Age-standardised         |                                     | Sex ratio<br>2019<br>F:M |
|---------------------|-------|------------------------------|---------------------------|-------------------------------------|--------------------------|-------------------------------------|--------------------------|
|                     |       |                              | Number (thousand)<br>2019 | Percent change<br>From 1990 to 2019 | Rate per 100,000<br>2019 | Percent change<br>From 1990 to 2019 |                          |
|                     |       |                              | Mean (95% UI)             | Mean (95% UI)                       | Mean (95% UI)            | Mean (95% UI)                       |                          |
|                     |       | Syrian Arab Republic         | 9.4 (8–10.9)              | 119.3% (108.2 to 130.6%)            | 109.7 (93.7–125.5)       | 0.8% (-2.6 to 4.4%)                 | 1.1                      |
|                     |       | Tunisia                      | 12 (10.3–13.8)            | 203.8% (188.7 to 220.8%)            | 110.7 (94.6–126.2)       | 0.2% (-2.7 to 3.1%)                 | 1.09                     |
|                     |       | Türkiye                      | 91 (78.3–103.6)           | 187.5% (177.6 to 195.8%)            | 112.9 (96.7–128.9)       | 1.5% (-1.8 to 4.5%)                 | 1.1                      |
|                     |       | United Arab Emirates         | 1.4 (1.1–1.6)             | 669.5% (600.8 to 739.7%)            | 103.1 (86.7–119.4)       | -0.9% (-3.8 to 2.1%)                | 1.09                     |
|                     |       | Yemen                        | 9.7 (8.3–11.1)            | 187.9% (177 to 199.2%)              | 109.3 (93.5–124.4)       | -2.7% (-5.7 to 0.3%)                | 1.07                     |
|                     |       | Afghanistan                  | 8.5 (7.1–9.8)             | 55.2% (48.4 to 62.1%)               | 109.4 (92.9–125.6)       | -1.9% (-5.1 to 1.6%)                | 1.07                     |
|                     |       | Sudan                        | 14.9 (12.7–17.1)          | 107.3% (97.2 to 117.9%)             | 108.2 (92.1–123.5)       | -1.3% (-4.4 to 1.8%)                | 1.08                     |
| Parkinson's disease |       | Global                       | 1081.7 (953.3–1211.2)     | 159.7% (153 to 167%)                | 13.4 (11.8–15)           | 19.6% (17 to 22.3%)                 | 0.56                     |
|                     |       | North Africa and Middle East | 42.8 (38.3–47.3)          | 192.5% (184.3 to 201.9%)            | 11.4 (10.3–12.5)         | 12.7% (9.9 to 15.7%)                | 0.68                     |
|                     |       | Algeria                      | 3.2 (2.8–3.7)             | 200.8% (176.4 to 228.3%)            | 11 (9.8–12.3)            | 6.6% (-0.9 to 15.4%)                | 0.75                     |
|                     |       | Bahrain                      | 0.1 (0.1–0.1)             | 466.8% (391.3 to 546%)              | 13.7 (12–15.5)           | 12.8% (1.4 to 26%)                  | 0.69                     |
|                     |       | Egypt                        | 6.3 (5.5–7.2)             | 142.4% (121.3 to 162.3%)            | 12 (10.5–13.6)           | 12.1% (3.7 to 20%)                  | 0.91                     |
|                     |       | Iran                         | 7.4 (6.3–8.7)             | 256.7% (226.9 to 285.1%)            | 11.2 (9.4–13.2)          | 13.7% (11.1 to 16.4%)               | 0.68                     |
|                     |       | Iraq                         | 2 (1.7–2.2)               | 183.6% (163.9 to 208.4%)            | 10 (8.8–11.3)            | 1.6% (-5.3 to 9.9%)                 | 0.62                     |
|                     |       | Jordan                       | 0.6 (0.5–0.6)             | 408% (353.5 to 457.6%)              | 10.3 (9.1–11.6)          | -3% (-12.7 to 6%)                   | 0.75                     |
|                     |       | Kuwait                       | 0.2 (0.2–0.2)             | 288.1% (244.9 to 338.3%)            | 8.4 (7.4–9.6)            | -11.5% (-23.7 to 2.8%)              | 0.65                     |
|                     |       | Lebanon                      | 0.5 (0.5–0.6)             | 189.9% (158.6 to 222.5%)            | 10.2 (9.2–11.4)          | 8.8% (-1 to 19.2%)                  | 0.68                     |
|                     |       | Libya                        | 0.5 (0.5–0.6)             | 208.6% (188.1 to 233.7%)            | 11.3 (9.9–12.5)          | 11.7% (3.9 to 20.6%)                | 0.66                     |
|                     |       | Morocco                      | 2.7 (2.4–3)               | 176.5% (152.1 to 204.6%)            | 9.8 (8.8–10.9)           | 21% (10.5 to 32.2%)                 | 0.59                     |
|                     |       | Palestine                    | 0.2 (0.2–0.2)             | 160.2% (139.7 to 183.5%)            | 11.3 (10.1–12.7)         | 3.8% (-3.7 to 12.4%)                | 0.62                     |
|                     |       | Oman                         | 0.2 (0.2–0.2)             | 222.3% (196.6 to 253.5%)            | 17.6 (15.6–20.1)         | 33.3% (23.2 to 45.2%)               | 0.54                     |
|                     |       | Qatar                        | 0.1 (0.1–0.1)             | 796.5% (707.7 to 879.6%)            | 18.4 (16.3–20.7)         | 26.5% (16.2 to 38.3%)               | 0.87                     |
|                     |       | Saudi Arabia                 | 2 (1.7–2.2)               | 224.7% (195.2 to 256.1%)            | 16 (14.4–18.2)           | 26.7% (16.2 to 38.2%)               | 0.51                     |
|                     |       | Syrian Arab Republic         | 1.2 (1–1.3)               | 153.7% (130.8 to 177.6%)            | 11.6 (10.3–12.9)         | 9.1% (0.1 to 19.3%)                 | 0.71                     |
|                     |       | Tunisia                      | 1.2 (1.1–1.4)             | 195.9% (169.2 to 227.2%)            | 10.5 (9.4–11.8)          | 12.5% (3.4 to 24.2%)                | 0.64                     |
|                     |       | Türkiye                      | 10.2 (9–11.5)             | 220.8% (198.1 to 247.2%)            | 12.3 (10.8–13.8)         | 19.9% (11.6 to 29.7%)               | 0.65                     |
|                     |       | United Arab Emirates         | 0.5 (0.4–0.6)             | 854.7% (769.4 to 943.5%)            | 19 (17.1–21.2)           | 14.3% (7.1 to 21.3%)                | 0.75                     |
|                     |       | Yemen                        | 1 (0.9–1.1)               | 207.8% (183.7 to 237.2%)            | 8.8 (7.8–9.8)            | 11.5% (3.4 to 21.9%)                | 0.68                     |
|                     |       | Afghanistan                  | 1.1 (1–1.2)               | 63.2% (48.2 to 78.2%)               | 10.5 (9.5–11.6)          | -2.8% (-8.8 to 4%)                  | 0.62                     |
|                     |       | Sudan                        | 1.6 (1.4–1.7)             | 94.7% (77.4 to 114.4%)              | 9.4 (8.4–10.6)           | -1.2% (-8.9 to 7.9%)                | 0.62                     |
| Idiopathic epilepsy |       | Global                       | 2898.2 (2098.7–3823.4)    | 55.9% (32.4 to 83.7%)               | 38.8 (28–51.3)           | 16.9% (0.1 to 36.5%)                | 0.86                     |
|                     |       | North Africa and Middle East | 295.5 (195–407.7)         | 67.4% (20.3 to 135.5%)              | 48.2 (32.2–66.4)         | 8.3% (-21.5 to 51.4%)               | 0.85                     |
|                     |       | Algeria                      | 20.2 (5.5–34.2)           | 44.1% (-64.1 to 502.9%)             | 48.2 (13.1–81.3)         | -0.3% (-74.5 to 315.8%)             | 0.88                     |
|                     |       | Bahrain                      | 0.8 (0.2–1.3)             | 134% (-28 to 809.6%)                | 61.2 (18.2–101.5)        | -5.2% (-70.4 to 270.5%)             | 0.87                     |
|                     |       | Egypt                        | 40.8 (10.7–70.8)          | 59.9% (-54.8 to 647.6%)             | 39.3 (10.5–68.1)         | -0.4% (-72 to 360.2%)               | 0.79                     |
|                     |       | Iran                         | 44.7 (30.1–62.1)          | 26.5% (-6.9 to 71.9%)               | 55.6 (37.2–77.3)         | 8.3% (-18.6 to 44%)                 | 0.87                     |
|                     |       | Iraq                         | 20.2 (4.9–36.1)           | 116.9% (-40.6 to 800.7%)            | 45.3 (11–79.1)           | 1.3% (-72.3 to 319.5%)              | 0.88                     |
|                     |       | Jordan                       | 5.7 (1.5–9.7)             | 183.9% (-25.7 to 975.2%)            | 46.5 (12.5–79)           | 4.7% (-72.3 to 291.9%)              | 0.86                     |
|                     |       | Kuwait                       | 2.2 (0.6–3.7)             | 115.4% (-38.4 to 703.8%)            | 56 (15.2–90.4)           | -0.9% (-72 to 282.6%)               | 0.87                     |
|                     |       | Lebanon                      | 2.6 (0.7–4.4)             | 50% (-61.3 to 581.9%)               | 50.9 (14.3–85.5)         | 7.2% (-72.2 to 387.8%)              | 0.85                     |
|                     |       | Libya                        | 2.9 (0.9–4.8)             | 19.4% (-63.1 to 350.8%)             | 45.6 (14.8–75)           | -8.1% (-69.9 to 242.5%)             | 0.84                     |
|                     |       | Morocco                      | 15.5 (4.1–27.5)           | 39.5% (-66.3 to 514.5%)             | 44.2 (11.7–78.4)         | 13.7% (-72.8 to 390.2%)             | 0.92                     |
|                     |       | Palestine                    | 2.5 (0.6–4.4)             | 126.4% (-42.8 to 926.7%)            | 45.6 (12–79.7)           | 5.7% (-72.6 to 387.6%)              | 0.87                     |
|                     |       | Oman                         | 2.2 (0.7–3.8)             | 134.3% (-32.3 to 837.3%)            | 50.3 (15.1–85.3)         | 19.4% (-65.9 to 372.9%)             | 0.87                     |
|                     |       | Qatar                        | 1.4 (0.4–2.4)             | 465.9% (62.6 to 2033.6%)            | 56.4 (16.9–93.7)         | 2% (-69.9 to 273.5%)                | 0.95                     |
|                     |       | Saudi Arabia                 | 23.9 (6.5–39.4)           | 153.9% (-31.8 to 928.7%)            | 71.1 (20.2–117.3)        | 33% (-62.7 to 418.5%)               | 0.92                     |
|                     |       | Syrian Arab Republic         | 5.9 (1.7–10.2)            | 1.6% (-73.8 to 372.8%)              | 41.7 (12.2–71.8)         | 12.6% (-70.5 to 417.6%)             | 0.88                     |
|                     |       | Tunisia                      | 4.7 (1.4–7.8)             | 35.2% (-66.3 to 480.4%)             | 43.8 (12.5–72.7)         | 17.2% (-71.6 to 406.5%)             | 0.91                     |

**Table S11** Cause- and sex-specific burden, mortality, incidence, and prevalence of neurological conditions in North Africa and Middle East countries

| Measure            | Cause                | Location                     | All Ages                  |                                     | Age-standardised         |                                     | Sex ratio<br>2019<br>F:M |
|--------------------|----------------------|------------------------------|---------------------------|-------------------------------------|--------------------------|-------------------------------------|--------------------------|
|                    |                      |                              | Number (thousand)<br>2019 | Percent change<br>From 1990 to 2019 | Rate per 100,000<br>2019 | Percent change<br>From 1990 to 2019 |                          |
|                    |                      |                              | Mean (95% UI)             | Mean (95% UI)                       | Mean (95% UI)            | Mean (95% UI)                       |                          |
| Multiple sclerosis |                      | Türkiye                      | 47.3 (14–76)              | 47.5% (-54.5 to 511%)               | 63.5 (18.8–103.2)        | 28.1% (-60.8 to 432.1%)             | 0.81                     |
|                    |                      | United Arab Emirates         | 5.3 (1.5–9)               | 307.6% (17.5 to 1375.9%)            | 65.1 (18.4–106.5)        | -6% (-73.4 to 237.2%)               | 0.82                     |
|                    |                      | Yemen                        | 12.7 (3.1–24)             | 118.1% (-53.8 to 1156.3%)           | 35.3 (8.5–66)            | 4.1% (-78 to 476%)                  | 0.85                     |
|                    |                      | Afghanistan                  | 16.1 (2.9–31.8)           | 234.2% (-28.5 to 2078.6%)           | 35.5 (6.5–69.7)          | -2.6% (-79.7 to 535%)               | 0.98                     |
|                    |                      | Sudan                        | 17.4 (4.2–32.4)           | 104.9% (-50.1 to 982.3%)            | 38 (9.2–69.8)            | 10.1% (-72.8 to 488.9%)             | 0.85                     |
|                    |                      | Global                       | 59.3 (51.8–66.9)          | 41.8% (37.7 to 45.7%)               | 0.7 (0.6–0.8)            | -7.3% (-8.7 to -5.8%)               | 1.69                     |
|                    |                      | North Africa and Middle East | 9.2 (7.9–10.5)            | 120% (110 to 129.4%)                | 1.4 (1.2–1.6)            | 5.5% (4 to 6.8%)                    | 1.75                     |
|                    |                      | Algeria                      | 0.7 (0.6–0.8)             | 138.2% (115.5 to 160%)              | 1.5 (1.3–1.8)            | 21.3% (15.6 to 28%)                 | 1.82                     |
|                    |                      | Bahrain                      | <0.1 (<0.1–<0.1)          | 271% (222.2 to 329%)                | 1.2 (1–1.5)              | 27.9% (21 to 34.9%)                 | 1.91                     |
|                    |                      | Egypt                        | 0.8 (0.7–1)               | 132.1% (123.1 to 142.2%)            | 0.8 (0.7–1)              | 17.6% (13.8 to 21.8%)               | 1.73                     |
|                    |                      | Iran                         | 1.9 (1.6–2.2)             | 78.9% (60.5 to 97.2%)               | 2 (1.7–2.2)              | -5.2% (-8.4 to -2%)                 | 1.77                     |
|                    |                      | Iraq                         | 0.6 (0.5–0.7)             | 238.3% (218.6 to 256.6%)            | 1.3 (1.1–1.6)            | 13.8% (9.2 to 18.5%)                | 1.78                     |
|                    |                      | Jordan                       | 0.2 (0.2–0.2)             | 245.5% (204.9 to 283.8%)            | 1.6 (1.3–1.9)            | -2.4% (-12.7 to 7.8%)               | 1.94                     |
|                    |                      | Kuwait                       | 0.1 (0.1–0.1)             | 302.1% (270.4 to 337.5%)            | 1.8 (1.5–2.1)            | 49.9% (41.5 to 58.8%)               | 1.6                      |
|                    |                      | Lebanon                      | 0.1 (0.1–0.1)             | 135.2% (114.3 to 158%)              | 1.8 (1.5–2.2)            | 26.5% (20.2 to 34.6%)               | 1.8                      |
|                    |                      | Libya                        | 0.1 (0.1–0.1)             | 169.2% (143.6 to 194.3%)            | 1.5 (1.3–1.7)            | 25.9% (19.4 to 30.9%)               | 1.67                     |
|                    |                      | Morocco                      | 0.6 (0.5–0.7)             | 87.7% (75.1 to 101.5%)              | 1.5 (1.2–1.8)            | 20.3% (14 to 26.9%)                 | 1.8                      |
|                    |                      | Palestine                    | 0.1 (0.1–0.1)             | 235.8% (219.6 to 254.9%)            | 1.5 (1.2–1.7)            | 16.3% (12.3 to 21.4%)               | 1.63                     |
|                    |                      | Oman                         | 0.1 (0.1–0.1)             | 340.4% (304.2 to 374.4%)            | 1.2 (1–1.4)              | 28% (21.8 to 34.8%)                 | 1.53                     |
|                    |                      | Qatar                        | 0.1 (0.1–0.1)             | 1046.5% (915.9 to 1227.2%)          | 1.8 (1.6–2)              | 44.3% (27.3 to 63.6%)               | 2.42                     |
|                    |                      | Saudi Arabia                 | 0.5 (0.4–0.6)             | 273.2% (242.2 to 306%)              | 1 (0.8–1.2)              | 22.9% (17.5 to 28.3%)               | 1.98                     |
|                    |                      | Syrian Arab Republic         | 0.2 (0.2–0.3)             | 50.7% (38.9 to 64.2%)               | 1.5 (1.2–1.8)            | 20.4% (15.3 to 25.1%)               | 1.94                     |
|                    |                      | Tunisia                      | 0.2 (0.2–0.3)             | 85.5% (69.4 to 102.4%)              | 1.7 (1.4–2.1)            | 23.2% (17.7 to 28.2%)               | 1.8                      |
|                    | Türkiye              | 1.6 (1.5–1.6)                | 53.6% (48.8 to 58.7%)     | 1.7 (1.6–1.8)                       | -2% (-4.3 to 0.4%)       | 1.67                                |                          |
|                    | United Arab Emirates | 0.2 (0.1–0.2)                | 498.6% (387.4 to 612.9%)  | 1.1 (0.9–1.2)                       | 5% (-1.1 to 12.2%)       | 1.48                                |                          |
|                    | Yemen                | 0.3 (0.2–0.3)                | 233.9% (217.3 to 251.1%)  | 0.9 (0.7–1)                         | 17.1% (11.5 to 22.6%)    | 1.56                                |                          |
|                    | Afghanistan          | 0.6 (0.5–0.7)                | 342.8% (318 to 368.5%)    | 1.6 (1.4–1.9)                       | 12.3% (7.4 to 17.5%)     | 1.87                                |                          |
|                    | Sudan                | 0.4 (0.3–0.4)                | 169.4% (156.9 to 182.3%)  | 0.9 (0.7–1)                         | 16.9% (12.1 to 22%)      | 1.58                                |                          |
| Migraine           |                      | Global                       | 87649 (76635.7–98654.6)   | 40% (36.8 to 43.5%)                 | 1142.5 (995.9–1289.4)    | 2.1% (1.1 to 2.8%)                  | 1.69                     |
|                    |                      | North Africa and Middle East | 7950.9 (6837.6–9083.6)    | 70.6% (62.7 to 79.1%)               | 1238.9 (1063.5–1415.6)   | 0.4% (-0.7 to 1.6%)                 | 1.69                     |
|                    |                      | Algeria                      | 527 (448–606.8)           | 50.7% (41.4 to 60.7%)               | 1234.6 (1047.1–1422.7)   | 0.1% (0 to 0.1%)                    | 1.66                     |
|                    |                      | Bahrain                      | 16.7 (14.3–19.3)          | 151.6% (132.1 to 176.2%)            | 1189.7 (1004.9–1375.8)   | 0.4% (0 to 0.8%)                    | 1.66                     |
|                    |                      | Egypt                        | 1383.8 (1182.6–1579.4)    | 85.2% (73.6 to 98.1%)               | 1285.1 (1107.4–1462.9)   | 3.3% (-2.1 to 9.3%)                 | 1.72                     |
|                    |                      | Iran                         | 1093.3 (967.5–1223.9)     | 31.4% (21.9 to 41.7%)               | 1274.7 (1119.7–1427)     | -0.7% (-3.4 to 2.3%)                | 1.75                     |
|                    |                      | Iraq                         | 569.3 (479.2–662.2)       | 140% (127.9 to 151.9%)              | 1229.4 (1042.5–1418.4)   | -0.1% (-0.2 to -0.1%)               | 1.66                     |
|                    |                      | Jordan                       | 155 (130.1–180.1)         | 199.1% (186.6 to 212.3%)            | 1213.3 (1027.6–1402.1)   | -0.6% (-0.8 to -0.5%)               | 1.66                     |
|                    |                      | Kuwait                       | 56 (47.9–65.3)            | 140.8% (123.9 to 159.7%)            | 1223.6 (1039.8–1415.4)   | 2.8% (-0.5 to 6.6%)                 | 1.64                     |
|                    |                      | Lebanon                      | 63.4 (54–72.9)            | 51.9% (44.8 to 59.7%)               | 1235.1 (1046.9–1423.5)   | -0.4% (-0.5 to -0.2%)               | 1.66                     |
|                    |                      | Libya                        | 87 (74.6–100)             | 51.3% (37.8 to 65.4%)               | 1227.8 (1041.4–1416.6)   | 1.1% (0.8 to 1.4%)                  | 1.66                     |
|                    |                      | Morocco                      | 456.4 (389.5–524.5)       | 32.8% (26.8 to 39%)                 | 1236.4 (1048.9–1424.6)   | -0.4% (-0.4 to -0.3%)               | 1.66                     |
|                    |                      | Palestine                    | 68.4 (56.9–80.3)          | 148.6% (140.3 to 156.8%)            | 1232.3 (1045–1421)       | -0.3% (-0.5 to -0.2%)               | 1.66                     |
|                    |                      | Oman                         | 55.9 (47.2–65.1)          | 119.2% (97.7 to 141.3%)             | 1153.5 (973.2–1340.3)    | -1% (-1.4 to -0.7%)                 | 1.66                     |
|                    |                      | Qatar                        | 32.3 (27.2–37.9)          | 494.1% (456 to 527.1%)              | 1106.2 (930.6–1292.4)    | -2.3% (-3 to -1.6%)                 | 1.66                     |
|                    |                      | Saudi Arabia                 | 449.3 (384–519.7)         | 110.6% (89.9 to 133.2%)             | 1179.2 (1004.5–1362.2)   | -0.6% (-3.9 to 2.4%)                | 1.56                     |
|                    |                      | Syrian Arab Republic         | 191.1 (160.8–221.4)       | 8% (0.1 to 15.9%)                   | 1261.9 (1074.4–1450.5)   | 2.4% (1.9 to 2.9%)                  | 1.66                     |
|                    |                      | Tunisia                      | 139.8 (120.1–160)         | 23.2% (16 to 31%)                   | 1239.1 (1051.9–1427.3)   | 0.2% (0.1 to 0.3%)                  | 1.66                     |
|                    |                      | Türkiye                      | 961.5 (826.6–1099.3)      | 23.7% (15.5 to 32.7%)               | 1200.2 (1023.9–1384.3)   | 0.3% (-3 to 4.4%)                   | 1.8                      |

**Table S11** Cause- and sex-specific burden, mortality, incidence, and prevalence of neurological conditions in North Africa and Middle East countries

| Measure               | Cause                | Location                     | All Ages                     |                                     | Age-standardised         |                                     | Sex ratio<br>2019<br>F:M |
|-----------------------|----------------------|------------------------------|------------------------------|-------------------------------------|--------------------------|-------------------------------------|--------------------------|
|                       |                      |                              | Number (thousand)<br>2019    | Percent change<br>From 1990 to 2019 | Rate per 100,000<br>2019 | Percent change<br>From 1990 to 2019 |                          |
|                       |                      |                              | Mean (95% UI)                | Mean (95% UI)                       | Mean (95% UI)            | Mean (95% UI)                       |                          |
| Tension-type headache |                      | United Arab Emirates         | 103.2 (86–123.5)             | 338.5% (291.1 to 393.5%)            | 1148.7 (968.7–1333.5)    | 0.3% (-0.2 to 1%)                   | 1.66                     |
|                       |                      | Yemen                        | 442 (365.1–521.9)            | 136.6% (126.1 to 146.9%)            | 1236.1 (1049.1–1424.3)   | -0.1% (-0.3 to 0%)                  | 1.66                     |
|                       |                      | Afghanistan                  | 524.9 (430.1–623.8)          | 255% (247.6 to 264.2%)              | 1229 (1042.8–1418)       | -2.2% (-2.7 to -1.8%)               | 1.66                     |
|                       |                      | Sudan                        | 566.6 (470.3–665)            | 110% (105.7 to 113.9%)              | 1240 (1052.1–1428.4)     | -0.3% (-0.4 to -0.1%)               | 1.66                     |
|                       |                      | Global                       | 706190.1 (626723.6–788575.3) | 49.6% (46.2 to 53.3%)               | 8968.2 (7931.9–9990.5)   | -0.4% (-1 to 0.2%)                  | 1.05                     |
|                       |                      | North Africa and Middle East | 52879.8 (46137–59485.2)      | 91.9% (84 to 99.8%)                 | 8680.1 (7631.6–9732.5)   | 0.9% (-0.1 to 1.7%)                 | 1.01                     |
|                       |                      | Algeria                      | 3544.5 (3089.9–4021.8)       | 76.2% (66.4 to 87%)                 | 8501 (7440.7–9578.6)     | -0.1% (-0.1 to -0.1%)               | 1.01                     |
|                       |                      | Bahrain                      | 130.8 (112.6–149.9)          | 208.6% (184.1 to 235.6%)            | 8524.4 (7476–9592.8)     | -0.2% (-0.3 to 0%)                  | 1.01                     |
|                       |                      | Egypt                        | 8593.6 (7460.4–9681.3)       | 88.9% (80.8 to 98%)                 | 8812.2 (7762.7–9893.9)   | 0.7% (-2.7 to 5%)                   | 1.01                     |
|                       |                      | Iran                         | 8430.1 (7411.2–9501.1)       | 67.4% (55.2 to 78.9%)               | 9837.5 (8687.5–11030.7)  | 5.3% (1.9 to 7.9%)                  | 1.00                     |
|                       |                      | Iraq                         | 3528 (3048–4011.2)           | 162.9% (153.4 to 172.6%)            | 8507.1 (7448.5–9584.3)   | 0% (0 to 0%)                        | 1.01                     |
|                       |                      | Jordan                       | 982.5 (849.6–1113.7)         | 235.1% (221 to 250.2%)              | 8508.4 (7455–9588.3)     | 0.1% (0 to 0.2%)                    | 1.01                     |
|                       |                      | Kuwait                       | 391.3 (340.7–446.6)          | 165.4% (150 to 182.2%)              | 8487.2 (7489.2–9540.2)   | -0.6% (-3.3 to 2.4%)                | 1.02                     |
|                       |                      | Lebanon                      | 442 (387.1–499.4)            | 69.9% (62.6 to 77%)                 | 8503.8 (7444.7–9581.2)   | 0.2% (0.1 to 0.3%)                  | 1.01                     |
|                       |                      | Libya                        | 599.2 (520.2–678.7)          | 81.7% (69.1 to 94.3%)               | 8508.4 (7450.6–9585.8)   | -0.1% (-0.2 to 0.1%)                | 1.01                     |
|                       |                      | Morocco                      | 3107.8 (2711.4–3503)         | 52.4% (46.3 to 59%)                 | 8502.5 (7441.7–9579.2)   | 0% (0 to 0%)                        | 1.01                     |
|                       |                      | Palestine                    | 405.5 (349.9–462.3)          | 163.7% (156.7 to 171.4%)            | 8503.8 (7444.3–9580.2)   | -0.1% (-0.2 to 0%)                  | 1.01                     |
|                       |                      | Oman                         | 403.5 (342.7–467.6)          | 164.3% (145.6 to 183.1%)            | 8531.4 (7483.3–9610.9)   | 0% (-0.2 to 0.1%)                   | 1.01                     |
|                       |                      | Qatar                        | 263.2 (222.4–306.8)          | 594.1% (567.9 to 620.2%)            | 8485.2 (7444.1–9569.2)   | -0.4% (-0.7 to -0.1%)               | 1.01                     |
|                       |                      | Saudi Arabia                 | 3081.9 (2653.4–3512.2)       | 150.6% (131.2 to 170.4%)            | 8206.1 (7168.6–9215.6)   | -1% (-4 to 2%)                      | 1.01                     |
|                       | Syrian Arab Republic | 1259.3 (1101.1–1426.1)       | 28.2% (20.3 to 35.8%)        | 8488 (7422.9–9561.3)                | -0.1% (-0.3 to 0.1%)     | 1.01                                |                          |
|                       | Tunisia              | 1013.2 (890.1–1140.5)        | 48% (40 to 56.9%)            | 8502 (7441.4–9578.4)                | 0% (0 to 0.1%)           | 1.01                                |                          |
|                       | Türkiye              | 7018.7 (6183.8–7932.9)       | 50% (41.3 to 59%)            | 8197.3 (7199.6–9252.4)              | 0.7% (-2.5 to 3.6%)      | 1.01                                |                          |
|                       | United Arab Emirates | 863.1 (722.1–1015.4)         | 451.2% (400.5 to 502.6%)     | 8528.1 (7490.2–9612.7)              | -0.1% (-0.3 to 0.1%)     | 1.01                                |                          |
|                       | Yemen                | 2528.3 (2163.2–2899)         | 152.5% (145.1 to 159.9%)     | 8504.5 (7443.4–9580.9)              | 0% (0 to 0.1%)           | 1.01                                |                          |
|                       | Afghanistan          | 2938.3 (2512.7–3388.7)       | 237% (225.6 to 247%)         | 8515.2 (7457.9–9593.9)              | 0.4% (0.2 to 0.6%)       | 1.01                                |                          |
|                       | Sudan                | 3301.3 (2844–3772.5)         | 114.8% (111.7 to 117.8%)     | 8482.4 (7418.8–9558.5)              | -0.1% (-0.2 to -0.1%)    | 1.01                                |                          |
| Motor neuron disease  |                      | Global                       | 63.7 (57.3–71.3)             | 79% (74.1 to 84%)                   | 0.8 (0.7–0.9)            | 0.3% (-0.4 to 0.9%)                 | 0.77                     |
|                       |                      | North Africa and Middle East | 3.4 (2.9–4.1)                | 83.1% (70.8 to 94.9%)               | 0.6 (0.5–0.7)            | 1.9% (0.3 to 3.6%)                  | 0.82                     |
|                       |                      | Algeria                      | 0.2 (0.2–0.3)                | 85.6% (68.4 to 104.6%)              | 0.5 (0.4–0.6)            | 0.8% (-2.8 to 4.5%)                 | 0.89                     |
|                       |                      | Bahrain                      | <0.1 (<0.1–<0.1)             | 254.2% (199.1 to 312.3%)            | 0.5 (0.4–0.6)            | 4.4% (0.6 to 8.3%)                  | 0.89                     |
|                       |                      | Egypt                        | 0.5 (0.4–0.6)                | 72.4% (60.2 to 83.7%)               | 0.5 (0.5–0.7)            | -1.8% (-5.2 to 2%)                  | 0.88                     |
|                       |                      | Iran                         | 0.5 (0.4–0.6)                | 69.8% (50.1 to 87.8%)               | 0.6 (0.5–0.7)            | 4.1% (2.2 to 6.2%)                  | 0.86                     |
|                       |                      | Iraq                         | 0.2 (0.2–0.3)                | 132.4% (110.9 to 154%)              | 0.6 (0.5–0.7)            | 4.1% (0.7 to 7.7%)                  | 0.87                     |
|                       |                      | Jordan                       | 0.1 (0–0.1)                  | 221% (185 to 257.9%)                | 0.5 (0.5–0.6)            | 2.4% (-1.9 to 6.6%)                 | 0.89                     |
|                       |                      | Kuwait                       | <0.1 (<0.1–<0.1)             | 142.6% (113.4 to 171.4%)            | 0.5 (0.4–0.6)            | -12% (-16.5 to -7.4%)               | 0.83                     |
|                       |                      | Lebanon                      | <0.1 (<0.1–<0.1)             | 63.7% (51.1 to 75.5%)               | 0.5 (0.4–0.6)            | -0.6% (-3.8 to 2.8%)                | 0.87                     |
|                       |                      | Libya                        | <0.1 (<0.1–<0.1)             | 65.1% (41.3 to 88%)                 | 0.5 (0.4–0.6)            | 1.4% (-2.7 to 5.5%)                 | 0.93                     |
|                       |                      | Morocco                      | 0.2 (0.2–0.2)                | 49.4% (34.4 to 64.1%)               | 0.6 (0.5–0.7)            | -2.1% (-5.8 to 1.6%)                | 0.88                     |
|                       |                      | Palestine                    | <0.1 (<0.1–<0.1)             | 119.4% (98.4 to 141.2%)             | 0.6 (0.5–0.7)            | 0.5% (-2.8 to 4.1%)                 | 0.89                     |
|                       |                      | Oman                         | <0.1 (<0.1–<0.1)             | 128% (101.1 to 156.7%)              | 0.5 (0.4–0.6)            | 0.6% (-3 to 4.1%)                   | 0.86                     |
|                       |                      | Qatar                        | <0.1 (<0.1–<0.1)             | 541% (467.6 to 611.6%)              | 0.5 (0.4–0.6)            | 1.3% (-2.6 to 5.5%)                 | 0.89                     |
|                       |                      | Saudi Arabia                 | 0.1 (0.1–0.2)                | 127.1% (94.5 to 161.5%)             | 0.5 (0.4–0.6)            | 3.1% (-1.3 to 7.2%)                 | 0.82                     |

**Table S11** Cause- and sex-specific burden, mortality, incidence, and prevalence of neurological conditions in North Africa and Middle East countries

| Measure            | Cause      | Location                     | All Ages                     |                                     | Age-standardised         |                                     | Sex ratio<br>2019<br>F:M |
|--------------------|------------|------------------------------|------------------------------|-------------------------------------|--------------------------|-------------------------------------|--------------------------|
|                    |            |                              | Number (thousand)<br>2019    | Percent change<br>From 1990 to 2019 | Rate per 100,000<br>2019 | Percent change<br>From 1990 to 2019 |                          |
|                    |            |                              | Mean (95% UI)                | Mean (95% UI)                       | Mean (95% UI)            | Mean (95% UI)                       |                          |
|                    |            | Syrian Arab Republic         | 0.1 (0.1–0.1)                | 18.3% (1 to 35.5%)                  | 0.6 (0.5–0.7)            | 0% (-3.6 to 4.2%)                   | 0.9                      |
|                    |            | Tunisia                      | 0.1 (0.1–0.1)                | 53.6% (37.7 to 69%)                 | 0.5 (0.5–0.7)            | -1.8% (-5.2 to 1.9%)                | 0.87                     |
|                    |            | Türkiye                      | 0.7 (0.6–0.8)                | 63.7% (53.4 to 74.5%)               | 0.9 (0.8–1)              | 7.9% (3.8 to 12%)                   | 0.68                     |
|                    |            | United Arab Emirates         | <0.1 (<0.1–0.1)              | 516.2% (409.8 to 613.1%)            | 0.5 (0.4–0.6)            | 8.5% (4.1 to 12.8%)                 | 0.86                     |
|                    |            | Yemen                        | 0.1 (0.1–0.2)                | 111.3% (93 to 130.7%)               | 0.5 (0.4–0.7)            | 1% (-2.7 to 5.3%)                   | 0.88                     |
|                    |            | Afghanistan                  | 0.2 (0.2–0.3)                | 203.3% (184.4 to 223.2%)            | 0.7 (0.6–0.8)            | 2.1% (-1 to 5.8%)                   | 0.9                      |
|                    |            | Sudan                        | 0.2 (0.1–0.2)                | 80.9% (68.1 to 93.4%)               | 0.5 (0.4–0.6)            | -1.7% (-5.2 to 2.6%)                | 0.88                     |
| Headache disorders |            | Global                       | 793839.1 (714299.8–877018.8) | 48.5% (45.4 to 51.7%)               | 10110.7 (9070.7–11167.1) | -0.2% (-0.7 to 0.4%)                | 1.11                     |
|                    |            | North Africa and Middle East | 60830.7 (53891.3–67676.1)    | 88.8% (82 to 95.6%)                 | 9919 (8853.1–10989.5)    | 0.8% (-0.1 to 1.5%)                 | 1.07                     |
|                    |            | Algeria                      | 4071.5 (3596.7–4536)         | 72.4% (63.8 to 81.7%)               | 9735.6 (8650–10821.3)    | -0.1% (-0.1 to 0%)                  | 1.07                     |
|                    |            | Bahrain                      | 147.5 (129.6–166.4)          | 200.9% (179.2 to 223.7%)            | 9714.1 (8647.6–10789.3)  | -0.1% (-0.2 to 0%)                  | 1.07                     |
|                    |            | Egypt                        | 9977.4 (8813.7–11125.9)      | 88.4% (81.1 to 96.3%)               | 10097.3 (9024.8–11179.1) | 1% (-2.1 to 4.7%)                   | 1.08                     |
|                    |            | Iran                         | 9523.5 (8508–10591.8)        | 62.3% (51.6 to 72.1%)               | 11112.1 (9952.4–12306.5) | 4.6% (1.6 to 6.9%)                  | 1.06                     |
|                    |            | Iraq                         | 4097.3 (3604.7–4592.2)       | 159.5% (151.2 to 168.2%)            | 9736.6 (8654.2–10821.6)  | 0% (0 to 0%)                        | 1.07                     |
|                    |            | Jordan                       | 1137.5 (1001.8–1274)         | 229.7% (217.7 to 242.6%)            | 9721.7 (8637.2–10804.7)  | 0% (-0.1 to 0.1%)                   | 1.07                     |
|                    |            | Kuwait                       | 447.3 (394–503.2)            | 162% (148.3 to 176%)                | 9710.8 (8639.4–10763.2)  | -0.1% (-2.6 to 2.5%)                | 1.08                     |
|                    |            | Lebanon                      | 505.4 (450.6–563.9)          | 67.4% (61.1 to 73.5%)               | 9738.8 (8650.3–10829.1)  | 0.1% (0 to 0.2%)                    | 1.07                     |
|                    |            | Libya                        | 686.2 (606.5–767.2)          | 77.2% (66.6 to 88.4%)               | 9736.2 (8655.1–10820.8)  | 0.1% (-0.1 to 0.2%)                 | 1.07                     |
|                    |            | Morocco                      | 3564.2 (3157.9–3966.9)       | 49.6% (44.3 to 55.2%)               | 9739 (8652.6–10825.3)    | -0.1% (-0.1 to 0%)                  | 1.07                     |
|                    |            | Palestine                    | 473.9 (414.8–534.7)          | 161.4% (155.4 to 168%)              | 9736.1 (8651.9–10822)    | -0.1% (-0.2 to 0%)                  | 1.07                     |
|                    |            | Oman                         | 459.4 (397.9–524.3)          | 157.8% (141.4 to 173.4%)            | 9684.9 (8625.4–10764)    | -0.2% (-0.3 to 0%)                  | 1.07                     |
|                    |            | Qatar                        | 295.5 (252.8–340.8)          | 581.5% (557.2 to 604.5%)            | 9591.5 (8532.6–10666.3)  | -0.6% (-0.9 to -0.3%)               | 1.07                     |
|                    |            | Saudi Arabia                 | 3531.2 (3088.6–3972.7)       | 144.7% (127.8 to 162.2%)            | 9385.4 (8318–10477.2)    | -1% (-3.5 to 1.8%)                  | 1.06                     |
|                    |            | Syrian Arab Republic         | 1450.4 (1285.1–1623.1)       | 25.1% (18.2 to 31.8%)               | 9749.8 (8662–10834.3)    | 0.2% (0 to 0.4%)                    | 1.07                     |
|                    |            | Tunisia                      | 1153 (1029.2–1281.5)         | 44.5% (37.3 to 51.9%)               | 9741 (8652.7–10828.7)    | 0.1% (0 to 0.1%)                    | 1.07                     |
|                    |            | Türkiye                      | 7980.1 (7127–8917.3)         | 46.3% (39 to 53.5%)                 | 9397.5 (8376.7–10486.8)  | 0.7% (-2.1 to 3.2%)                 | 1.09                     |
|                    |            | United Arab Emirates         | 966.3 (822.4–1117.1)         | 436.5% (392.1 to 481.4%)            | 9676.8 (8629.4–10745.8)  | 0% (-0.2 to 0.2%)                   | 1.07                     |
|                    |            | Yemen                        | 2970.2 (2605–3349.3)         | 150% (143.5 to 156.6%)              | 9740.6 (8655.2–10825.6)  | 0% (-0.1 to 0.1%)                   | 1.07                     |
|                    |            | Afghanistan                  | 3463.2 (3022.7–3937.2)       | 239.6% (230 to 248.4%)              | 9744.2 (8662.8–10828.1)  | 0.1% (-0.1 to 0.3%)                 | 1.07                     |
|                    |            | Sudan                        | 3867.9 (3387.7–4370.9)       | 114.1% (111.4 to 116.6%)            | 9722.3 (8634.6–10808)    | -0.2% (-0.2 to -0.1%)               | 1.07                     |
| Prevalence         | Meningitis | Global                       | 7683.5 (6590.3–9132.2)       | -23.7% (-26 to -21.1%)              | 99.9 (85.5–118.8)        | -47.2% (-48.7 to -45.5%)            | 0.98                     |
|                    |            | North Africa and Middle East | 356.2 (306.7–419.9)          | 5.7% (-1.6 to 14%)                  | 60.5 (52.2–71.1)         | -44.7% (-48.4 to -40.7%)            | 1.12                     |
|                    |            | Algeria                      | 21.6 (17.7–26.8)             | 21.7% (-1.1 to 48.1%)               | 53.2 (43.5–65.7)         | -32.3% (-45.1 to -17.5%)            | 1.00                     |
|                    |            | Bahrain                      | 0.6 (0.5–0.7)                | 76.6% (45 to 110.6%)                | 40.1 (32.7–48.6)         | -46.2% (-56.2 to -35.5%)            | 0.83                     |

**Table S11** Cause- and sex-specific burden, mortality, incidence, and prevalence of neurological conditions in North Africa and Middle East countries

| Measure      | Cause | Location                     | All Ages                  |                                     | Age-standardised         |                                     | Sex ratio<br>2019<br>F:M |
|--------------|-------|------------------------------|---------------------------|-------------------------------------|--------------------------|-------------------------------------|--------------------------|
|              |       |                              | Number (thousand)<br>2019 | Percent change<br>From 1990 to 2019 | Rate per 100,000<br>2019 | Percent change<br>From 1990 to 2019 |                          |
|              |       |                              | Mean (95% UI)             | Mean (95% UI)                       | Mean (95% UI)            | Mean (95% UI)                       |                          |
|              |       | Egypt                        | 60.6 (49.3–75.6)          | 5.3% (-15.3 to 29.8%)               | 63.8 (51.9–79.7)         | -42.7% (-54.3 to -29.3%)            | 0.98                     |
|              |       | Iran                         | 58.7 (50.1–69.3)          | 3% (-5.1 to 12.2%)                  | 69.4 (59.2–82)           | -35.7% (-40.3 to -30.8%)            | 2.02                     |
|              |       | Iraq                         | 23.9 (19.7–29.1)          | 46.7% (18.5 to 80.2%)               | 59.8 (49.5–72.5)         | -42% (-53.5 to -28.6%)              | 0.98                     |
|              |       | Jordan                       | 9.5 (7.8–11.6)            | 174.9% (126.3 to 229.7%)            | 86.2 (71.1–105.2)        | -17.7% (-32.3 to -1.2%)             | 1.01                     |
|              |       | Kuwait                       | 1.7 (1.4–2)               | 102.1% (65 to 145.4%)               | 37.6 (31–46.1)           | -25.8% (-39.2 to -9.4%)             | 1.08                     |
|              |       | Lebanon                      | 2.9 (2.4–3.6)             | 2.5% (-15.3 to 24.6%)               | 55.7 (45.8–68.5)         | -39.8% (-50.5 to -26.9%)            | 1.02                     |
|              |       | Libya                        | 3.4 (2.8–4.3)             | 52.6% (23.9 to 86.7%)               | 50.3 (41.7–63.7)         | -14.6% (-31 to 3.9%)                | 1.05                     |
|              |       | Morocco                      | 24.5 (19.8–30.6)          | -27.1% (-41.4 to -10.6%)            | 69.2 (55.9–86.4)         | -51.8% (-61.5 to -40.5%)            | 0.9                      |
|              |       | Palestine                    | 3.2 (2.7–4)               | 32.6% (8.9 to 60.5%)                | 71.5 (58.7–88.5)         | -47.2% (-56.9 to -35.8%)            | 1.05                     |
|              |       | Oman                         | 0.7 (0.6–0.9)             | 55.8% (26.2 to 90.2%)               | 17.1 (13.6–21.7)         | -38.1% (-50.1 to -23.9%)            | 0.78                     |
|              |       | Qatar                        | 2.6 (2.1–3.1)             | 421.2% (327.5 to 527.1%)            | 89 (73.1–108.5)          | -26.2% (-39.7 to -10.5%)            | 0.96                     |
|              |       | Saudi Arabia                 | 10.8 (8.6–13.3)           | 81.2% (46.1 to 117.4%)              | 31.2 (25–38.3)           | -29.1% (-43.3 to -14.4%)            | 1.03                     |
|              |       | Syrian Arab Republic         | 11.7 (9.7–14.4)           | -31.5% (-44.6 to -16.5%)            | 82.1 (68.7–101)          | -45% (-55.3 to -32.4%)              | 1.00                     |
|              |       | Tunisia                      | 7.5 (6.2–9.1)             | 5.1% (-14.9 to 28.5%)               | 63.4 (52–76.9)           | -31.3% (-44.6 to -16.1%)            | 1.14                     |
|              |       | Türkiye                      | 12.6 (10.4–15.5)          | -53.5% (-63 to -42.9%)              | 14.9 (12.3–18.4)         | -69% (-75.3 to -62%)                | 0.76                     |
|              |       | United Arab Emirates         | 3.2 (2.6–4)               | 333.9% (251.6 to 421.7%)            | 38.3 (31.2–47.4)         | -21% (-36.2 to -5%)                 | 1.08                     |
|              |       | Yemen                        | 23.5 (18.7–29.6)          | 71.4% (33.2 to 115.3%)              | 84.5 (67.6–106.3)        | -29.7% (-45.4 to -11.7%)            | 0.94                     |
|              |       | Afghanistan                  | 56.5 (46.4–68.9)          | 71.4% (34.9 to 114.7%)              | 217.1 (178.4–261.1)      | -41% (-53.6 to -26.1%)              | 1.11                     |
|              |       | Sudan                        | 16.3 (13.1–20.4)          | -55.8% (-64.7 to -43.9%)            | 44.1 (35.4–54.9)         | -79% (-83.3 to -73.3%)              | 0.92                     |
| Encephalitis |       | Global                       | 4499.4 (3372.1–5573.2)    | 4.7% (1.6 to 8.9%)                  | 56.8 (42.6–70.3)         | -31.9% (-33.9 to -28.5%)            | 0.99                     |
|              |       | North Africa and Middle East | 167.5 (127.8–205.9)       | 79.3% (73.4 to 86.9%)               | 28 (21.2–34.6)           | -10.4% (-13.5 to -5.9%)             | 1.3                      |
|              |       | Algeria                      | 9.6 (7.4–11.9)            | 87.5% (76.2 to 99.4%)               | 23.2 (17.7–28.8)         | -0.2% (-6.2 to 6.6%)                | 1.2                      |
|              |       | Bahrain                      | 0.3 (0.2–0.3)             | 212.3% (193.4 to 232.4%)            | 17.1 (13.3–21.4)         | -4.4% (-10.7 to 2%)                 | 1.22                     |
|              |       | Egypt                        | 27.2 (20.8–33.7)          | 52.4% (42.3 to 64.1%)               | 28.5 (21.5–35.6)         | -20.2% (-25.6 to -14%)              | 1.19                     |
|              |       | Iran                         | 20.9 (16.2–25.6)          | 52.4% (47.1 to 59.2%)               | 24.2 (18.8–29.7)         | -10.8% (-13.8 to -6.1%)             | 1.24                     |
|              |       | Iraq                         | 11.2 (8.6–13.8)           | 131.8% (119.3 to 146.5%)            | 28.4 (21.2–35.2)         | -13.3% (-18.3 to -7.4%)             | 1.29                     |
|              |       | Jordan                       | 2.9 (2.2–3.5)             | 194.6% (179 to 209.4%)              | 25.8 (19.8–32.2)         | -14.3% (-19.2 to -9.7%)             | 1.23                     |
|              |       | Kuwait                       | 0.7 (0.6–0.9)             | 173.5% (154 to 193.4%)              | 16.1 (12.5–20)           | -3.3% (-10.5 to 4.2%)               | 1.26                     |
|              |       | Lebanon                      | 1.7 (1.3–2.1)             | 36.5% (29.2 to 44%)                 | 32.1 (24.7–39.8)         | -23.2% (-27.5 to -18.4%)            | 1.5                      |
|              |       | Libya                        | 1.3 (1–1.6)               | 151.6% (137.9 to 165.6%)            | 18.8 (14.2–23.5)         | 33.2% (26.1 to 40.4%)               | 1.2                      |
|              |       | Morocco                      | 9.8 (7.4–12.3)            | 43.3% (35.1 to 52.7%)               | 27 (20.3–33.7)           | -10.3% (-15.8 to -4%)               | 1.29                     |
|              |       | Palestine                    | 1.5 (1.2–1.9)             | 153.8% (139.4 to 169%)              | 33.9 (25.9–42.1)         | -4.8% (-10.5 to 1%)                 | 1.2                      |
|              |       | Oman                         | 1.2 (1–1.5)               | 115.7% (99.9 to 131.1%)             | 28.9 (22.3–35.6)         | -18.2% (-24.5 to -11.5%)            | 1.00                     |
|              |       | Qatar                        | 0.4 (0.3–0.5)             | 521.9% (468.5 to 576%)              | 13 (10–16.2)             | -10.8% (-18.7 to -2.6%)             | 1.24                     |
|              |       | Saudi Arabia                 | 6.2 (4.8–7.8)             | 146.9% (128.5 to 165%)              | 17.2 (13.2–21.7)         | -7.3% (-14.1 to -0.2%)              | 1.26                     |
|              |       | Syrian Arab Republic         | 4.6 (3.5–5.7)             | 17.4% (9.8 to 25.1%)                | 31.5 (23.9–39.6)         | -12.7% (-18.7 to -6.8%)             | 1.23                     |
|              |       | Tunisia                      | 3.1 (2.4–3.8)             | 41.2% (33.7 to 49.1%)               | 25.6 (19.5–31.7)         | -11.4% (-16.1 to -6.4%)             | 1.27                     |
|              |       | Türkiye                      | 23.7 (18.2–29.3)          | 39.7% (31.6 to 48%)                 | 27.2 (21–33.5)           | -12.3% (-17.9 to -6.4%)             | 1.31                     |
|              |       | United Arab Emirates         | 1.5 (1.2–1.9)             | 596.8% (542.3 to 656.7%)            | 15.3 (11.6–19.2)         | 23.9% (13.7 to 35.1%)               | 1.22                     |
|              |       | Yemen                        | 9 (6.7–11.5)              | 175.4% (154.6 to 195.5%)            | 32.5 (23.6–41.7)         | 9.1% (0.5 to 17.5%)                 | 1.23                     |
|              |       | Afghanistan                  | 19.8 (14.6–25.3)          | 232.3% (204.9 to 263.8%)            | 69.4 (48.6–89.3)         | 4.4% (-4.1 to 13.2%)                | 1.58                     |
|              |       | Sudan                        | 10.5 (8–13.3)             | 88.7% (75 to 106%)                  | 28.9 (21.5–36.5)         | -12.4% (-18.8 to -4.3%)             | 1.25                     |
| Tetanus      |       | Global                       | 61.7 (44.6–81.2)          | -64.4% (-68.1 to -61.2%)            | 0.8 (0.6–1.1)            | -73.7% (-76.2 to -71.5%)            | 1.01                     |
|              |       | North Africa and Middle East | 0.7 (0.5–1.1)             | -35.7% (-53.8 to -16.2%)            | 0.1 (0.1–0.2)            | -61.7% (-70.5 to -51.9%)            | 0.63                     |
|              |       | Algeria                      | <0.1 (<0.1–<0.1)          | -10.2% (-45.5 to 17.6%)             | <0.1 (<0.1–<0.1)         | -45.1% (-65.9 to -28.6%)            | 0.68                     |
|              |       | Bahrain                      | <0.1 (<0.1–<0.1)          | 168.5% (143.6 to 196.5%)            | 0.1 (0–0.1)              | -5.9% (-15.2 to 3.8%)               | 0.76                     |
|              |       | Egypt                        | 0.1 (0.1–0.2)             | -36.6% (-54.2 to -18%)              | 0.1 (0.1–0.2)            | -63.5% (-73.5 to -53.2%)            | 0.34                     |
|              |       | Iran                         | <0.1 (<0.1–<0.1)          | -58.9% (-72.9 to -44.9%)            | <0.1 (<0.1–<0.1)         | -69.4% (-78.2 to -61.1%)            | 0.59                     |



**Table S11** Cause- and sex-specific burden, mortality, incidence, and prevalence of neurological conditions in North Africa and Middle East countries

| Measure                                 | Cause                        | Location             | All Ages                    |                                     | Age-standardised         |                                     | Sex ratio<br>2019<br>F:M |
|-----------------------------------------|------------------------------|----------------------|-----------------------------|-------------------------------------|--------------------------|-------------------------------------|--------------------------|
|                                         |                              |                      | Number (thousand)<br>2019   | Percent change<br>From 1990 to 2019 | Rate per 100,000<br>2019 | Percent change<br>From 1990 to 2019 |                          |
|                                         |                              |                      | Mean (95% UI)               | Mean (95% UI)                       | Mean (95% UI)            | Mean (95% UI)                       |                          |
|                                         |                              | Iraq                 | 0.1 (<0.1–0.1)              | -23.6% (-51.5 to 6.3%)              | 0.1 (0.1–0.2)            | -63.5% (-73.9 to -53.4%)            | 0.45                     |
|                                         |                              | Jordan               | <0.1 (<0.1–<0.1)            | 71.8% (23.6 to 119%)                | <0.1 (<0.1–0.1)          | -40.8% (-55.8 to -26.1%)            | 0.58                     |
|                                         |                              | Kuwait               | <0.1 (<0.1–<0.1)            | 136% (117 to 157.4%)                | 0.1 (0–0.1)              | -6.2% (-13.7 to 2.4%)               | 0.92                     |
|                                         |                              | Lebanon              | <0.1 (<0.1–<0.1)            | -39.7% (-80.8 to 55%)               | 0.1 (0–0.2)              | -72.6% (-90.5 to -27.6%)            | 0.76                     |
|                                         |                              | Libya                | <0.1 (<0.1–<0.1)            | 15.8% (-16.4 to 39.3%)              | <0.1 (<0.1–<0.1)         | -26.3% (-48.5 to -11.7%)            | 0.78                     |
|                                         |                              | Morocco              | 0.1 (0.1–0.2)               | -48.9% (-67.7 to -28.2%)            | 0.4 (0.2–0.5)            | -57.8% (-71.1 to -43.8%)            | 0.76                     |
|                                         |                              | Palestine            | <0.1 (<0.1–<0.1)            | -7% (-58.9 to 44.8%)                | <0.1 (<0.1–0.1)          | -52.6% (-74.1 to -36.1%)            | 0.61                     |
|                                         |                              | Oman                 | <0.1 (<0.1–<0.1)            | 44.3% (-13.4 to 94.5%)              | <0.1 (<0.1–<0.1)         | -50.9% (-79.9 to -20.2%)            | 0.8                      |
|                                         |                              | Qatar                | <0.1 (<0.1–<0.1)            | 454.9% (372.5 to 504.4%)            | <0.1 (<0.1–0.1)          | -11.4% (-30.2 to -2.7%)             | 2.29                     |
|                                         |                              | Saudi Arabia         | <0.1 (<0.1–<0.1)            | -39.1% (-76.9 to 7%)                | <0.1 (<0.1–0.1)          | -71.4% (-87.9 to -51%)              | 0.84                     |
|                                         |                              | Syrian Arab Republic | <0.1 (<0.1–<0.1)            | -73.6% (-84.1 to -61.8%)            | 0.1 (0–0.1)              | -72.3% (-81.1 to -63.1%)            | 0.77                     |
|                                         |                              | Tunisia              | <0.1 (<0.1–<0.1)            | -13.1% (-43.5 to 11.7%)             | <0.1 (<0.1–<0.1)         | -35.6% (-57.7 to -18.4%)            | 0.75                     |
|                                         |                              | Türkiye              | <0.1 (<0.1–0.1)             | -58.7% (-76.1 to -34.5%)            | 0.1 (0–0.1)              | -74.2% (-86.2 to -54.7%)            | 0.83                     |
|                                         |                              | United Arab Emirates | <0.1 (<0.1–<0.1)            | 59% (-27 to 218.5%)                 | 0.2 (0.1–0.3)            | -82.6% (-92.8 to -36.4%)            | 1.64                     |
|                                         |                              | Yemen                | <0.1 (<0.1–0.1)             | -21.7% (-65.9 to 29.9%)             | 0.1 (0.1–0.2)            | -58.7% (-79.3 to -40.8%)            | 0.34                     |
|                                         |                              | Afghanistan          | 0.2 (0.2–0.3)               | -14% (-47.3 to 48.1%)               | 0.6 (0.4–0.8)            | -67.3% (-77.7 to -51.9%)            | 0.86                     |
|                                         |                              | Sudan                | <0.1 (<0.1–0.1)             | -41.6% (-69.4 to -8.5%)             | 0.1 (0.1–0.2)            | -65.6% (-79.8 to -52.8%)            | 0.37                     |
| Brain and central nervous system cancer | Global                       |                      | 1065.3 (800.4–1199.9)       | 151.5% (50.8 to 195.7%)             | 13.5 (10.1–15.2)         | 59.7% (-2.4 to 86.2%)               | 1.01                     |
|                                         | North Africa and Middle East |                      | 97.2 (64.2–115.6)           | 280.5% (113.9 to 424.7%)            | 16.5 (10.8–19.5)         | 119.1% (30.2 to 189.1%)             | 0.81                     |
|                                         |                              | Algeria              | 3.5 (2.1–4.6)               | 240.6% (80.2 to 401.8%)             | 8.3 (4.9–11.1)           | 118.4% (15.6 to 213.7%)             | 0.93                     |
|                                         |                              | Bahrain              | 0.2 (0.1–0.3)               | 723.9% (389.9 to 1098.2%)           | 14.8 (9.4–19.3)          | 147.5% (49.6 to 250.5%)             | 0.73                     |
|                                         |                              | Egypt                | 8.4 (5.6–11.7)              | 226.4% (63.4 to 401.9%)             | 8.7 (5.9–12)             | 81.5% (1.2 to 172%)                 | 0.79                     |
|                                         |                              | Iran                 | 23.2 (12.1–29.5)            | 221.6% (78.6 to 352.2%)             | 27.7 (14.4–35.1)         | 129.4% (36.1 to 203.2%)             | 0.85                     |
|                                         |                              | Iraq                 | 9.5 (6.8–12.6)              | 422.3% (154.6 to 768.9%)            | 23.5 (17–31.2)           | 123.7% (14.7 to 254.7%)             | 1.00                     |
|                                         |                              | Jordan               | 1.8 (1.3–2.3)               | 709.6% (408.1 to 1031.3%)           | 15.8 (11.4–20)           | 146.1% (57.1 to 240.4%)             | 0.84                     |
|                                         |                              | Kuwait               | 0.8 (0.6–1.1)               | 417% (212.8 to 610.5%)              | 20.8 (14.7–26.2)         | 120.7% (35.2 to 197.4%)             | 0.56                     |
|                                         |                              | Lebanon              | 1.8 (1.2–2.3)               | 535.7% (309.1 to 812.8%)            | 34 (23.6–44.8)           | 284.7% (150.6 to 439.7%)            | 0.7                      |
|                                         |                              | Libya                | 1 (0.7–1.4)                 | 173.7% (77.5 to 332.5%)             | 15.3 (11–20.2)           | 69.6% (17.6 to 153.3%)              | 0.58                     |
|                                         |                              | Morocco              | 1.6 (1.1–2.3)               | 158.2% (39 to 300.6%)               | 4.6 (3–6.5)              | 79.1% (0.8 to 165.4%)               | 1.37                     |
|                                         |                              | Palestine            | 1.1 (0.9–1.5)               | 280.7% (122 to 456.2%)              | 25 (18.9–31.3)           | 60.2% (2.7 to 120.3%)               | 0.76                     |
|                                         |                              | Oman                 | 0.7 (0.4–0.9)               | 754.3% (329.7 to 1289.4%)           | 15.7 (9.1–20.4)          | 255.2% (76.4 to 453.4%)             | 0.85                     |
|                                         |                              | Qatar                | 0.6 (0.4–1)                 | 2220% (1205.8 to 3531.3%)           | 24.3 (17–36.4)           | 230.5% (93.2 to 395%)               | 0.94                     |
|                                         |                              | Saudi Arabia         | 6.8 (4.8–10.2)              | 1355.6% (660.2 to 2697.9%)          | 17.9 (13.1–26.5)         | 444.1% (181.8 to 910.9%)            | 1.06                     |
|                                         |                              | Syrian Arab Republic | 2.5 (1.8–3.3)               | 166.4% (57.3 to 321.2%)             | 17.5 (12.8–23.6)         | 109.7% (38.8 to 216.7%)             | 0.78                     |
|                                         |                              | Tunisia              | 0.9 (0.6–1.3)               | 239.2% (90.3 to 430.9%)             | 8.1 (5.2–11.4)           | 157.8% (49 to 292.8%)               | 1.1                      |
|                                         |                              | Türkiye              | 23.1 (11.3–32.3)            | 279.2% (97.5 to 516%)               | 29 (14.5–40)             | 173.1% (53 to 322.7%)               | 0.72                     |
|                                         |                              | United Arab Emirates | 1.5 (0.9–2.3)               | 820.1% (481.5 to 1255.4%)           | 16.2 (9.5–22.6)          | 60.9% (-6.8 to 134.6%)              | 0.78                     |
|                                         |                              | Yemen                | 1.9 (1.1–2.8)               | 210% (60 to 521.8%)                 | 6.8 (4.1–9.9)            | 47.8% (-18.6 to 161.2%)             | 0.73                     |
|                                         |                              | Afghanistan          | 2.5 (1.3–4.4)               | 183% (72 to 445.1%)                 | 7.6 (4.3–13.6)           | 2.9% (-33 to 74.3%)                 | 0.79                     |
|                                         |                              | Sudan                | 3.7 (2.1–5.3)               | 166.2% (16.8 to 550.4%)             | 9.1 (5.4–13.2)           | 47% (-25.8 to 197.7%)               | 0.67                     |
| Stroke*                                 | Global                       |                      | 101474.6 (93211.9–110526.3) | 85.3% (82.6 to 88.2%)               | 1240.3 (1139.7–1353)     | -6.1% (-7.2 to -5%)                 | 1.14                     |
|                                         | North Africa and Middle East |                      | 7323.4 (6794.7–7863.1)      | 142.1% (137.8 to 146.3%)            | 1537.5 (1421.9–1659.9)   | -0.5% (-2.3 to 1.1%)                | 1.24                     |
|                                         |                              | Algeria              | 549.7 (506.6–593)           | 129% (118.8 to 139.1%)              | 1540.3 (1417.2–1668)     | -10.7% (-14.5 to -7%)               | 1.26                     |
|                                         |                              | Bahrain              | 14.5 (13.4–15.8)            | 292.5% (272.2 to 313.4%)            | 1136.4 (1049–1234.8)     | -24.2% (-27.5 to -20.8%)            | 1.35                     |
|                                         |                              | Egypt                | 1269.8 (1170.8–1374.6)      | 151.8% (140.2 to 163.9%)            | 1806.1 (1658.1–1974.5)   | 18.5% (12.9 to 23.9%)               | 1.35                     |
|                                         |                              | Iran                 | 963.5 (859.2–1079.7)        | 123.4% (115.9 to 131.2%)            | 1253.8 (1113.5–1418.4)   | -13.3% (-15.9 to -10.7%)            | 1.16                     |
|                                         |                              | Iraq                 | 520 (483.1–557.3)           | 169.6% (159 to 180.7%)              | 1968.8 (1823.4–2122.1)   | -9.6% (-13.3 to -5.4%)              | 1.18                     |

**Table S11** Cause- and sex-specific burden, mortality, incidence, and prevalence of neurological conditions in North Africa and Middle East countries

| Measure                   | Cause                        | Location             | All Ages                  |                                     | Age-standardised         |                                     | Sex ratio<br>2019<br>F:M |
|---------------------------|------------------------------|----------------------|---------------------------|-------------------------------------|--------------------------|-------------------------------------|--------------------------|
|                           |                              |                      | Number (thousand)<br>2019 | Percent change<br>From 1990 to 2019 | Rate per 100,000<br>2019 | Percent change<br>From 1990 to 2019 |                          |
|                           |                              |                      | Mean (95% UI)             | Mean (95% UI)                       | Mean (95% UI)            | Mean (95% UI)                       |                          |
|                           |                              | Jordan               | 134·6 (123·3–145·5)       | 258·4% (239·7 to 275%)              | 1793·9 (1621·2–1952·9)   | -23·4% (-27·7 to -19·5%)            | 1·25                     |
|                           |                              | Kuwait               | 42·7 (39·3–46·4)          | 267·6% (248·5 to 287·1%)            | 1230·6 (1134·6–1332·5)   | -5·9% (-10·4 to -1·4%)              | 1·05                     |
|                           |                              | Lebanon              | 74·8 (69·4–80·8)          | 124·2% (114·6 to 134·6%)            | 1425·1 (1320·3–1538·1)   | 2·2% (-1·8 to 6·6%)                 | 1·39                     |
|                           |                              | Libya                | 90·4 (83·4–96·9)          | 201·2% (186·1 to 214·9%)            | 1588·4 (1461·7–1712·9)   | 14% (8·9 to 18·7%)                  | 1·59                     |
|                           |                              | Morocco              | 557·1 (515·5–599·7)       | 120·3% (110·8 to 131%)              | 1695·1 (1563·4–1833·2)   | 3·4% (-0·7 to 8·2%)                 | 1·33                     |
|                           |                              | Palestine            | 41·3 (37·8–45·1)          | 167·1% (153·9 to 180·9%)            | 1510·8 (1381·5–1666·5)   | -3·7% (-8·5 to 1·4%)                | 1·33                     |
|                           |                              | Oman                 | 37·7 (34·6–41·2)          | 167·7% (154·3 to 182%)              | 1525·6 (1399·9–1686·6)   | -8·5% (-12·4 to -4·5%)              | 1·1                      |
|                           |                              | Qatar                | 22·3 (20·3–24·5)          | 568·9% (532·5 to 607·4%)            | 1226·3 (1127·4–1327·2)   | -22·2% (-25·6 to -18·9%)            | 1·31                     |
|                           |                              | Saudi Arabia         | 480·5 (442·2–523·2)       | 238·8% (214·5 to 262·7%)            | 1967·7 (1818·1–2143·5)   | 7·9% (-0·1 to 15·2%)                | 1·33                     |
|                           |                              | Syrian Arab Republic | 199·6 (184·4–215·1)       | 78·9% (71·6 to 86·2%)               | 1518·7 (1403·8–1637·5)   | -13·9% (-17·3 to -10·5%)            | 1·14                     |
|                           |                              | Tunisia              | 159·9 (147·4–173·4)       | 184·9% (171 to 200·3%)              | 1260·8 (1162·6–1366)     | 22·1% (16·3 to 28·2%)               | 1·19                     |
|                           |                              | Türkiye              | 1080·4 (1002·6–1164·9)    | 103·3% (94·4 to 112·7%)             | 1213·6 (1124·7–1309·4)   | -8·7% (-12·4 to -4·6%)              | 1·21                     |
|                           |                              | United Arab Emirates | 136·8 (125·5–148·3)       | 721·6% (675·3 to 767·1%)            | 2225·7 (2037·3–2436·3)   | -7·5% (-11·6 to -3·6%)              | 1·22                     |
|                           |                              | Yemen                | 260·9 (242–280·8)         | 174·8% (161·2 to 188·1%)            | 1609·4 (1480·2–1745·5)   | 0·8% (-4·2 to 5·7%)                 | 1·25                     |
|                           |                              | Afghanistan          | 281·2 (260·9–302·7)       | 130·1% (117·5 to 141·2%)            | 1657·6 (1533·4–1779·5)   | 3·8% (-1·2 to 8%)                   | 1·31                     |
|                           |                              | Sudan                | 398 (367·1–427·9)         | 124·6% (114·5 to 134·3%)            | 1785·8 (1645·2–1936·9)   | 8·2% (3·7 to 12·8%)                 | 1·33                     |
| Ischaemic stroke          | Global                       |                      | 77192·5 (68857·2–86457·6) | 95·3% (91·7 to 99·3%)               | 951 (849·8–1064·1)       | -1·9% (-3·4 to -0·4%)               | 1·19                     |
|                           | North Africa and Middle East |                      | 5998·8 (5474–6566·7)      | 157·6% (152·8 to 162·7%)            | 1303·6 (1183·2–1435·4)   | 5·9% (3·6 to 8%)                    | 1·25                     |
|                           |                              | Algeria              | 470 (427·5–513·8)         | 150·1% (138·7 to 161·4%)            | 1347·1 (1227–1477·6)     | -2·6% (-6·7 to 1·7%)                | 1·26                     |
|                           |                              | Bahrain              | 11·2 (10·1–12·4)          | 297·3% (276·9 to 317·4%)            | 949·2 (859·7–1048·7)     | -23·8% (-27·5 to -20·2%)            | 1·34                     |
|                           |                              | Egypt                | 1089·8 (991–1195)         | 181·7% (168·2 to 194·4%)            | 1597 (1436·4–1765·4)     | 31·7% (24·9 to 38·1%)               | 1·37                     |
|                           |                              | Iran                 | 849 (736·7–971·9)         | 123·9% (115·1 to 132·9%)            | 1127·4 (977–1300·9)      | -13·1% (-16·1 to -10·1%)            | 1·16                     |
|                           |                              | Iraq                 | 414·4 (378·2–449·6)       | 169·7% (158·8 to 182·2%)            | 1656·7 (1500·2–1820)     | -7·6% (-11·8 to -2·6%)              | 1·27                     |
|                           |                              | Jordan               | 113·8 (102·4–124·4)       | 256·8% (238·1 to 273·9%)            | 1591·7 (1411·6–1753·9)   | -23·9% (-28·6 to -19·4%)            | 1·27                     |
|                           |                              | Kuwait               | 33 (29·8–36·3)            | 264·5% (248·5 to 281%)              | 1032·1 (934·4–1132·1)    | -6·5% (-11 to -2·1%)                | 1·02                     |
|                           |                              | Lebanon              | 65·7 (59·9–71·6)          | 141·5% (131·1 to 153%)              | 1254 (1145–1367·4)       | 8·4% (4 to 13·1%)                   | 1·38                     |
|                           |                              | Libya                | 76·4 (69·4–83)            | 223·3% (207·5 to 239%)              | 1395·3 (1262·3–1526·8)   | 23·5% (17·7 to 29·4%)               | 1·63                     |
|                           |                              | Morocco              | 476·8 (435·2–521·4)       | 144% (133 to 156·2%)                | 1480·4 (1346·4–1625·7)   | 13·5% (8·4 to 19·4%)                | 1·35                     |
|                           |                              | Palestine            | 35·2 (31·8–39)            | 168·2% (155·5 to 180·7%)            | 1341·8 (1205·3–1496·6)   | -0·6% (-5·9 to 4·6%)                | 1·33                     |
|                           |                              | Oman                 | 29·8 (27–33)              | 176·1% (164 to 190%)                | 1327·2 (1192·6–1493·3)   | -2·9% (-7·6 to 1·9%)                | 1·01                     |
|                           |                              | Qatar                | 15·9 (14·1–17·9)          | 593·8% (566·3 to 621·8%)            | 1000·1 (908·5–1098·6)    | -20·9% (-24·8 to -17·5%)            | 1·31                     |
|                           |                              | Saudi Arabia         | 321·1 (290·9–356·3)       | 249·5% (214·9 to 281·5%)            | 1504·9 (1360·8–1680·6)   | 13·5% (1·9 to 23·8%)                | 1·37                     |
|                           |                              | Syrian Arab Republic | 156·7 (142·9–171·2)       | 94% (86·3 to 102%)                  | 1224·1 (1107·6–1338·3)   | -8·4% (-12·3 to -4·5%)              | 1·19                     |
|                           |                              | Tunisia              | 141·9 (129–155·7)         | 191·6% (178·5 to 206·8%)            | 1130·1 (1028·1–1240·4)   | 25·6% (20·1 to 31·5%)               | 1·17                     |
|                           |                              | Türkiye              | 838·4 (764·1–920·8)       | 114·7% (104·8 to 124·9%)            | 956·3 (872·9–1049·7)     | -5·2% (-9·5 to -0·7%)               | 1·21                     |
|                           |                              | United Arab Emirates | 108·9 (98·6–119·9)        | 779·7% (733·4 to 827·4%)            | 2005·1 (1808·4–2238·2)   | -3·3% (-7·9 to 1·1%)                | 1·23                     |
|                           |                              | Yemen                | 210·9 (192·4–230·5)       | 215·7% (201·3 to 229·9%)            | 1355·2 (1220·3–1492·9)   | 15·9% (9·8 to 21·5%)                | 1·27                     |
|                           |                              | Afghanistan          | 208 (188·8–227)           | 148·9% (135 to 162·7%)              | 1309·1 (1187·6–1435·3)   | 18·2% (12·4 to 23·2%)               | 1·28                     |
|                           |                              | Sudan                | 325·7 (297·5–355·5)       | 153·9% (143·4 to 165%)              | 1520·7 (1375·6–1681·8)   | 23·8% (18·5 to 29·5%)               | 1·35                     |
| Intracerebral haemorrhage | Global                       |                      | 20663·9 (18016·2–23417·9) | 57·8% (56·1 to 59·6%)               | 248·8 (217·1–281·4)      | -16·8% (-18·2 to -15·4%)            | 0·9                      |
|                           | North Africa and Middle East |                      | 1301·3 (1169·2–1441·4)    | 89·8% (86 to 93·8%)                 | 241·6 (217·5–265·7)      | -21·1% (-23·1 to -19·2%)            | 1·07                     |
|                           |                              | Algeria              | 78·7 (70·9–86·7)          | 50% (43·8 to 56·9%)                 | 201·9 (182·3–221·3)      | -39·9% (-42·7 to -37·1%)            | 1·14                     |
|                           |                              | Bahrain              | 2·9 (2·5–3·2)             | 223·4% (207·8 to 239·9%)            | 186 (166·5–205·7)        | -31·2% (-34·4 to -28·1%)            | 1·3                      |
|                           |                              | Egypt                | 191·8 (173·5–212·1)       | 69% (62·2 to 75·9%)                 | 236·1 (213·7–260·5)      | -21·7% (-25·2 to -18·5%)            | 1·19                     |
|                           |                              | Iran                 | 115·8 (100–132·7)         | 89·9% (83·3 to 96·5%)               | 138·3 (120·1–157·2)      | -16·3% (-19·5 to -13·1%)            | 0·99                     |
|                           |                              | Iraq                 | 110·4 (101·1–120)         | 164·6% (154·8 to 175·5%)            | 346·5 (316·6–378·4)      | -16% (-19·1 to -12·4%)              | 0·81                     |
|                           |                              | Jordan               | 19·7 (17·3–22·3)          | 218·2% (201·4 to 234·9%)            | 213·9 (189·8–238·7)      | -29·2% (-33·2 to -25%)              | 1·07                     |



**Table S11** Cause- and sex-specific burden, mortality, incidence, and prevalence of neurological conditions in North Africa and Middle East countries

| Measure                              | Cause | Location                     | All Ages                        |                                     | Age-standardised          |                                     | Sex ratio<br>2019<br>F:M |
|--------------------------------------|-------|------------------------------|---------------------------------|-------------------------------------|---------------------------|-------------------------------------|--------------------------|
|                                      |       |                              | Number (thousand)<br>2019       | Percent change<br>From 1990 to 2019 | Rate per 100,000<br>2019  | Percent change<br>From 1990 to 2019 |                          |
|                                      |       |                              | Mean (95% UI)                   | Mean (95% UI)                       | Mean (95% UI)             | Mean (95% UI)                       |                          |
|                                      |       | Kuwait                       | 7.7 (6.7–8.7)                   | 239.2% (220.8 to 258%)              | 181.9 (160.3–202.9)       | -5.9% (-11 to -1.2%)                | 0.93                     |
|                                      |       | Lebanon                      | 9 (8–10)                        | 51.2% (44.4 to 58%)                 | 170.3 (151.9–188.9)       | -25.4% (-29 to -21.9%)              | 1.31                     |
|                                      |       | Libya                        | 13.2 (11.9–14.5)                | 104.8% (97 to 113.1%)               | 202.1 (182.3–222.3)       | -21.3% (-24.3 to -18%)              | 1.35                     |
|                                      |       | Morocco                      | 81.1 (73.4–90)                  | 46.4% (40.9 to 51.9%)               | 227.7 (205.7–251.9)       | -29% (-31.8 to -26%)                | 1.14                     |
|                                      |       | Palestine                    | 6.1 (5.3–7.1)                   | 137.1% (123.4 to 153%)              | 176.6 (155.3–203.6)       | -21.6% (-26.1 to -16.1%)            | 1.13                     |
|                                      |       | Oman                         | 7.3 (6.3–8.3)                   | 123.3% (111.7 to 136.7%)            | 215.3 (191.2–240.9)       | -30.2% (-33.6 to -26.2%)            | 1.57                     |
|                                      |       | Qatar                        | 5.1 (4.4–5.8)                   | 492.5% (460.9 to 527.5%)            | 209.1 (184.9–232.2)       | -28.6% (-32.2 to -24.8%)            | 1.19                     |
|                                      |       | Saudi Arabia                 | 153.8 (128.3–183.3)             | 202.7% (182.9 to 223%)              | 493.7 (421.2–576.3)       | -5.3% (-10.8 to 0%)                 | 1.18                     |
|                                      |       | Syrian Arab Republic         | 42.2 (38.2–46.3)                | 34.9% (29.2 to 42.7%)               | 298.5 (270.2–327.4)       | -30.1% (-33.2 to -26.4%)            | 0.89                     |
|                                      |       | Tunisia                      | 16.6 (14.3–18.8)                | 118.3% (97.6 to 140%)               | 128.2 (110–144.9)         | 2% (-6.9 to 12.1%)                  | 1.12                     |
|                                      |       | Türkiye                      | 212.8 (190.9–233.9)             | 73.1% (65.5 to 81.5%)               | 234.6 (210.6–257.5)       | -15.9% (-19.7 to -11.7%)            | 1.08                     |
|                                      |       | United Arab Emirates         | 25 (22.3–28.1)                  | 509.4% (482.8 to 536.8%)            | 282.6 (253.7–312.3)       | -30.3% (-33.4 to -27.3%)            | 1.08                     |
|                                      |       | Yemen                        | 51.2 (46.6–56.5)                | 82.4% (74.1 to 92.2%)               | 260 (236.1–286)           | -37% (-39.8 to -33.6%)              | 1.04                     |
|                                      |       | Afghanistan                  | 74.9 (67.2–82.1)                | 90.7% (79.7 to 103%)                | 355.1 (316.2–392)         | -27% (-30.2 to -23.5%)              | 1.33                     |
|                                      |       | Sudan                        | 74.7 (67.9–82.2)                | 54.2% (47 to 62.2%)                 | 279.6 (253.9–307.1)       | -31.9% (-34.9 to -28.8%)            | 1.14                     |
| Subarachnoid haemorrhage             |       | Global                       | 8396.5 (7188.2–9833.3)          | 64.5% (60.4 to 68%)                 | 101.6 (87.1–118.5)        | -12.9% (-15 to -11.5%)              | 1.44                     |
|                                      |       | North Africa and Middle East | 376.9 (320.2–444.6)             | 103.4% (85 to 112.9%)               | 64 (54.5–75.3)            | -18.1% (-26.3 to -14.1%)            | 1.58                     |
|                                      |       | Algeria                      | 27.3 (21.8–32.4)                | 97.8% (51.7 to 114.1%)              | 64.7 (51.8–76.8)          | -24.2% (-43 to -17.1%)              | 1.5                      |
|                                      |       | Bahrain                      | 1.1 (0.9–1.3)                   | 361.9% (326.7 to 396.5%)            | 53.2 (44.2–63.1)          | -6.4% (-11.9 to -1.2%)              | 1.52                     |
|                                      |       | Egypt                        | 54.4 (45.4–64.2)                | 68.6% (46.1 to 79.3%)               | 61.4 (51.6–72.5)          | -21.5% (-33 to -16.4%)              | 1.64                     |
|                                      |       | Iran                         | 45.4 (37.3–54.9)                | 127.3% (117.8 to 136.1%)            | 49.4 (40.8–59.3)          | -7.1% (-8.9 to -5.2%)               | 1.56                     |
|                                      |       | Iraq                         | 21 (16.9–24.9)                  | 141.6% (88.5 to 162%)               | 58.9 (46–70)              | -26.1% (-45.7 to -19.5%)            | 1.61                     |
|                                      |       | Jordan                       | 7.8 (6.6–9.3)                   | 347.5% (322.3 to 392.6%)            | 74.9 (62.3–88.5)          | -1.1% (-5.6 to 8.6%)                | 1.51                     |
|                                      |       | Kuwait                       | 3.9 (3.2–4.6)                   | 281.6% (257.9 to 310.1%)            | 71.5 (59–84.8)            | 2.1% (-3 to 10%)                    | 1.64                     |
|                                      |       | Lebanon                      | 3.6 (3.4–3)                     | 81% (63.8 to 91.7%)                 | 67.8 (56.1–80.9)          | -9.6% (-18.9 to -4.4%)              | 1.62                     |
|                                      |       | Libya                        | 4.8 (3.9–5.7)                   | 146.3% (106.5 to 162.2%)            | 63.7 (51.5–75.1)          | -11.4% (-27.1 to -6.2%)             | 1.6                      |
|                                      |       | Morocco                      | 24.6 (20.5–29.4)                | 58.4% (35.6 to 68.5%)               | 66.1 (55.6–78.6)          | -22.9% (-34.4 to -17.4%)            | 1.55                     |
|                                      |       | Palestine                    | 2.5 (2.1–3)                     | 207.6% (193.3 to 224.2%)            | 65.6 (54.2–77.7)          | -4.3% (-9 to 0.6%)                  | 1.64                     |
|                                      |       | Oman                         | 2.6 (2.2–3.1)                   | 179.6% (153.1 to 197.5%)            | 58 (48.9–68.6)            | -18.9% (-29.7 to -13.9%)            | 1.67                     |
|                                      |       | Qatar                        | 2.4 (2–2.9)                     | 577% (448.3 to 625.5%)              | 73.6 (57.6–87.5)          | -17.4% (-38.8 to -11.6%)            | 1.54                     |
|                                      |       | Saudi Arabia                 | 23.5 (19.5–27.7)                | 252.7% (233.5 to 271.3%)            | 58.5 (48.5–69.5)          | -3.1% (-9.2 to 1%)                  | 1.64                     |
|                                      |       | Syrian Arab Republic         | 9.4 (7.4–11.3)                  | 61.6% (28.4 to 73.6%)               | 63.1 (50.8–74.9)          | -15.5% (-32.3 to -9.8%)             | 1.44                     |
|                                      |       | Tunisia                      | 8.7 (7–10.3)                    | 119% (70.2 to 145.7%)               | 65.2 (53.3–76.9)          | 3.7% (-19 to 15.8%)                 | 1.63                     |
|                                      |       | Türkiye                      | 74 (62.7–86.5)                  | 63.7% (55.6 to 73.9%)               | 78.4 (66.2–91.3)          | -19.2% (-23.3 to -14.1%)            | 1.52                     |
|                                      |       | United Arab Emirates         | 8 (6.7–9.5)                     | 644.4% (588.5 to 698.8%)            | 58 (49–68.4)              | -15.4% (-23.2 to -10.8%)            | 1.69                     |
|                                      |       | Yemen                        | 15 (12.7–17.6)                  | 138.3% (125.8 to 151.7%)            | 68.9 (58.1–81.4)          | -17.6% (-21.9 to -12.6%)            | 1.61                     |
|                                      |       | Afghanistan                  | 16.4 (13.7–19.5)                | 170.2% (152.7 to 189.5%)            | 66.9 (56.4–79.3)          | -10.6% (-14.9 to -6.4%)             | 1.58                     |
|                                      |       | Sudan                        | 20.1 (17–23.6)                  | 87.1% (77.4 to 98.7%)               | 67.6 (57.5–79.7)          | -19.5% (-23.9 to -14.5%)            | 1.57                     |
| Neurological disorders <sup>†*</sup> |       | Global                       | 2658932.4 (2452847.9–2858528.8) | 54.9% (52.4 to 57.4%)               | 33451.9 (30870.7–36082)   | 0.4% (-0.1 to 0.9%)                 | 1.19                     |
|                                      |       | North Africa and Middle East | 208460.5 (190465.7–226945.6)    | 101.2% (95.9 to 106.6%)             | 34170.6 (31389.5–37068.5) | 1.4% (0.6 to 2.3%)                  | 1.19                     |
|                                      |       | Algeria                      | 14066.4 (12788.1–15403)         | 86.2% (78.9 to 93.9%)               | 33570.1 (30564.3–36622.8) | 0.1% (-0.7 to 1%)                   | 1.19                     |
|                                      |       | Bahrain                      | 524.4 (473.9–576.7)             | 221.5% (205.6 to 238.1%)            | 33112.7 (30197.4–36147)   | -0.1% (-1.2 to 1%)                  | 1.18                     |
|                                      |       | Egypt                        | 34352.8 (31415.8–37326.1)       | 96.6% (89 to 104.2%)                | 35726.9 (32855.2–38512.6) | 2.8% (-0.8 to 6.7%)                 | 1.2                      |
|                                      |       | Iran                         | 33461.6 (30981.9–35941.1)       | 81.4% (73.2 to 90%)                 | 38297.2 (35449.7–41091.4) | 5.3% (3.4 to 7.3%)                  | 1.15                     |

**Table S11** Cause- and sex-specific burden, mortality, incidence, and prevalence of neurological conditions in North Africa and Middle East countries

| Measure                                 | Cause                        | Location             | All Ages                  |                                     | Age-standardised          |                                     | Sex ratio<br>2019<br>F:M |
|-----------------------------------------|------------------------------|----------------------|---------------------------|-------------------------------------|---------------------------|-------------------------------------|--------------------------|
|                                         |                              |                      | Number (thousand)<br>2019 | Percent change<br>From 1990 to 2019 | Rate per 100,000<br>2019  | Percent change<br>From 1990 to 2019 |                          |
|                                         |                              |                      | Mean (95% UI)             | Mean (95% UI)                       | Mean (95% UI)             | Mean (95% UI)                       |                          |
|                                         |                              | Iraq                 | 13749.7 (12424.5–15155.1) | 174.7% (168.3 to 181.5%)            | 33513.6 (30526.4–36599.7) | 0.2% (-0.6 to 1.1%)                 | 1.18                     |
|                                         |                              | Jordan               | 3820.3 (3444.4–4203.3)    | 248.2% (237.8 to 259.4%)            | 33366.2 (30403.8–36446.1) | 0.1% (-0.7 to 0.9%)                 | 1.19                     |
|                                         |                              | Kuwait               | 1592.6 (1444.6–1756.4)    | 180.3% (168.3 to 192.5%)            | 33272 (30301.2–36326.1)   | 0.8% (-1.7 to 3.5%)                 | 1.2                      |
|                                         |                              | Lebanon              | 1765.5 (1607.1–1930.3)    | 76.4% (71.6 to 81.4%)               | 33723.8 (30708.5–36796.6) | 0.5% (-0.4 to 1.4%)                 | 1.18                     |
|                                         |                              | Libya                | 2417.2 (2195–2643.4)      | 96.6% (87.7 to 105.5%)              | 33496.5 (30469–36534.7)   | 0.7% (-0.1 to 1.4%)                 | 1.18                     |
|                                         |                              | Morocco              | 12337 (11206.9–13482.8)   | 58.5% (53.8 to 63%)                 | 33537 (30530.4–36612.6)   | 0.2% (-0.6 to 1%)                   | 1.19                     |
|                                         |                              | Palestine            | 1555.7 (1395.3–1715.1)    | 172.9% (167.6 to 178.5%)            | 33527.9 (30565.1–36597.7) | -0.1% (-0.9 to 0.8%)                | 1.18                     |
|                                         |                              | Oman                 | 1575.2 (1415–1754.3)      | 180.2% (168.3 to 193%)              | 32834.2 (29837.3–35871.3) | 0.1% (-0.9 to 1%)                   | 1.18                     |
|                                         |                              | Qatar                | 1029.9 (924.9–1150.2)     | 608.8% (592 to 626%)                | 32245.1 (29313.4–35220.7) | -0.7% (-1.7 to 0.3%)                | 1.19                     |
|                                         |                              | Saudi Arabia         | 12255.8 (11107.4–13550.3) | 166.8% (153.5 to 180.3%)            | 31719.5 (28912–34577.5)   | -1% (-3.6 to 1.9%)                  | 1.16                     |
|                                         |                              | Syrian Arab Republic | 4994 (4532.8–5479.4)      | 37.4% (32.5 to 42.4%)               | 33730.3 (30733.5–36791.7) | 1.1% (0.2 to 1.9%)                  | 1.19                     |
|                                         |                              | Tunisia              | 4068.6 (3719.3–4444.1)    | 55.6% (49.5 to 61.5%)               | 33620.3 (30668–36658.7)   | 0.5% (-0.2 to 1.3%)                 | 1.19                     |
|                                         |                              | Türkiye              | 28054 (25592.4–30582.4)   | 57.3% (50.3 to 63.9%)               | 31966.2 (29201.8–34866.9) | 1% (-1.6 to 3.6%)                   | 1.24                     |
|                                         |                              | United Arab Emirates | 3418.9 (3055.9–3814.3)    | 475.3% (441.9 to 508.3%)            | 32631.3 (29615.7–35673.5) | -0.1% (-1.3 to 1%)                  | 1.18                     |
|                                         |                              | Yemen                | 9573.6 (8555–10612.4)     | 163.6% (158.4 to 168.8%)            | 33439.2 (30457.6–36527.8) | 0.1% (-0.6 to 0.9%)                 | 1.19                     |
|                                         |                              | Afghanistan          | 10980.2 (9799.2–12197.3)  | 234.7% (227.3 to 241.4%)            | 33401.5 (30465.4–36481)   | -0.4% (-1.3 to 0.4%)                | 1.19                     |
|                                         |                              | Sudan                | 12655.4 (11340.5–13986.7) | 119.4% (116.7 to 122.3%)            | 33434.1 (30397.1–36506.1) | 0.1% (-0.7 to 0.9%)                 | 1.19                     |
| Alzheimer's disease and other dementias | Global                       |                      | 51624.2 (44277–59021.5)   | 160.9% (156 to 166.3%)              | 682.5 (585.2–782.7)       | 5.7% (4.3 to 7%)                    | 1.28                     |
|                                         | North Africa and Middle East |                      | 2485.1 (2117.2–2865)      | 184.5% (178.1 to 190.7%)            | 777.6 (660.8–896)         | 3% (1.5 to 4.6%)                    | 1.11                     |
|                                         |                              | Algeria              | 193.1 (162.8–224)         | 231.7% (211.8 to 253.3%)            | 777.5 (659.7–898.6)       | 1.5% (-1.9 to 4.8%)                 | 1.1                      |
|                                         |                              | Bahrain              | 3.8 (3.2–4.3)             | 450.3% (424.1 to 479.2%)            | 801.1 (684.2–925.8)       | 3.5% (0.2 to 7.1%)                  | 1.1                      |
|                                         |                              | Egypt                | 295.8 (250.9–342.6)       | 121.4% (113.8 to 129.1%)            | 750.4 (635.6–866.1)       | 5.2% (1.4 to 8.7%)                  | 1.12                     |
|                                         |                              | Iran                 | 470.9 (397.9–542.9)       | 303.8% (282.7 to 328.6%)            | 789 (667.8–910.4)         | 1.6% (-0.3 to 3.2%)                 | 1.1                      |
|                                         |                              | Iraq                 | 118.9 (101.5–137.3)       | 165.6% (156.2 to 176.3%)            | 764.1 (647.4–882)         | 3.8% (0.7 to 7.5%)                  | 1.11                     |
|                                         |                              | Jordan               | 32 (27–37.4)              | 432.9% (411.5 to 453.7%)            | 763.4 (645.9–890)         | 3.8% (-0.1 to 7.8%)                 | 1.1                      |
|                                         |                              | Kuwait               | 14.3 (12.3–16.4)          | 401.3% (382.3 to 422%)              | 798.8 (682.4–922)         | 1.3% (-2.1 to 4.8%)                 | 1.12                     |
|                                         |                              | Lebanon              | 39.9 (34.1–46.4)          | 221% (204.8 to 235.4%)              | 792.4 (677.6–916.5)       | 4.2% (0.5 to 8.4%)                  | 1.11                     |
|                                         |                              | Libya                | 30.5 (25.8–35.2)          | 169.1% (159.2 to 178.8%)            | 755.9 (635.1–874.7)       | -1.1% (-4.6 to 2.6%)                | 1.1                      |
|                                         |                              | Morocco              | 174.6 (147.7–202.3)       | 145% (135.7 to 155%)                | 761.7 (643.9–884.8)       | 0.5% (-2.9 to 4.3%)                 | 1.1                      |
|                                         |                              | Palestine            | 12 (10.3–14)              | 135.9% (126.9 to 144.7%)            | 771.8 (652.9–891)         | 2.1% (-1.8 to 5.8%)                 | 1.09                     |
|                                         |                              | Oman                 | 6.7 (5.7–7.8)             | 143.4% (135.2 to 153.2%)            | 789.5 (668.6–913.6)       | 1.1% (-2.4 to 4.6%)                 | 1.11                     |
|                                         |                              | Qatar                | 2.7 (2.3–3.2)             | 685.6% (629.8 to 752.1%)            | 779.2 (654.8–905.3)       | 3.9% (0.1 to 8.2%)                  | 1.1                      |
|                                         |                              | Saudi Arabia         | 67.8 (58–77.8)            | 133.2% (122.1 to 147%)              | 770.3 (648.2–891.9)       | 0.8% (-2.6 to 5.3%)                 | 1.12                     |
|                                         |                              | Syrian Arab Republic | 63.7 (53.7–74)            | 117.3% (106.6 to 128.4%)            | 770.3 (653.1–892.3)       | 2.3% (-1.7 to 6.3%)                 | 1.12                     |
|                                         |                              | Tunisia              | 84.6 (72–98)              | 215.4% (200.5 to 231.5%)            | 791.8 (670.4–916)         | 2.1% (-1.3 to 5.5%)                 | 1.12                     |
|                                         |                              | Türkiye              | 643.1 (550.3–741.8)       | 198.7% (188.4 to 208.2%)            | 805.1 (686.6–926.2)       | 4.7% (1 to 8.1%)                    | 1.13                     |
|                                         |                              | United Arab Emirates | 8.1 (6.6–9.6)             | 636.5% (579.7 to 696.4%)            | 721.3 (602.2–842.2)       | -0.1% (-3.5 to 3.2%)                | 1.11                     |

**Table S11** Cause- and sex-specific burden, mortality, incidence, and prevalence of neurological conditions in North Africa and Middle East countries

|                      |                              | All Ages                 |                           | Age-standardised      |                          |           |
|----------------------|------------------------------|--------------------------|---------------------------|-----------------------|--------------------------|-----------|
| Measure              | Location                     | Number (thousand)        | Percent change            | Rate per 100,000      | Percent change           | Sex ratio |
|                      |                              | 2019                     | From 1990 to 2019         | 2019                  | From 1990 to 2019        | 2019      |
| Cause                |                              | Mean (95% UI)            | Mean (95% UI)             | Mean (95% UI)         | Mean (95% UI)            | F:M       |
| Parkinson's disease  | Yemen                        | 64.8 (54.8–74.7)         | 190.8% (179.6 to 203%)    | 752.3 (639.3–869.6)   | -2.7% (-6 to 1.1%)       | 1.09      |
|                      | Afghanistan                  | 54.8 (45.9–63.6)         | 54.1% (47.3 to 60.4%)     | 735.4 (616.4–852.4)   | -1.6% (-5.3 to 2.4%)     | 1.09      |
|                      | Sudan                        | 100.5 (85.7–116)         | 111.9% (101.4 to 122%)    | 746.2 (630.2–861.7)   | 0.2% (-3.3 to 3.8%)      | 1.1       |
|                      | Global                       | 8511 (7288.5–9841.4)     | 155.5% (150.4 to 161%)    | 106.3 (91.2–122.2)    | 15.9% (13.3 to 18.5%)    | 0.68      |
|                      | North Africa and Middle East | 309.9 (265–362.8)        | 199.5% (188.8 to 211.2%)  | 82.6 (70.2–95.6)      | 15.4% (11.5 to 20%)      | 0.74      |
|                      | Algeria                      | 24 (19.9–28.8)           | 217.4% (181 to 255.3%)    | 80.4 (66.5–96.8)      | 10.2% (-1.1 to 22%)      | 0.78      |
|                      | Bahrain                      | 0.7 (0.6–0.8)            | 493.1% (408.4 to 582.9%)  | 94 (75.9–113.4)       | 12.5% (-5.2 to 33.3%)    | 0.73      |
|                      | Egypt                        | 43.8 (36.1–52.6)         | 148.8% (120 to 177.7%)    | 84.4 (69.1–101)       | 17.3% (3.6 to 30.7%)     | 0.85      |
|                      | Iran                         | 56.5 (47.3–66.9)         | 260.9% (235 to 285.6%)    | 85.1 (70.2–101.3)     | 13.1% (10.4 to 15.8%)    | 0.75      |
|                      | Iraq                         | 14.4 (11.8–17.1)         | 193.4% (168.2 to 226.9%)  | 74.2 (61.1–87.9)      | 5.1% (-4.3 to 17.1%)     | 0.67      |
|                      | Jordan                       | 4.1 (3.4–4.9)            | 425.7% (364.4 to 488.4%)  | 77 (63.4–91.5)        | 3% (-11.5 to 16.6%)      | 0.79      |
|                      | Kuwait                       | 1.6 (1.3–1.9)            | 315.1% (261.1 to 379.4%)  | 71.4 (59.1–86.1)      | -8.5% (-23.9 to 9.9%)    | 0.72      |
|                      | Lebanon                      | 4.1 (3.5–4.8)            | 192.1% (157.6 to 228.7%)  | 77.6 (66.5–90.9)      | 9.3% (-3.1 to 23.6%)     | 0.75      |
|                      | Libya                        | 3.8 (3.2–4.5)            | 213.5% (184.3 to 251.5%)  | 84.1 (69.3–98.3)      | 13.5% (2.3 to 27.9%)     | 0.74      |
|                      | Morocco                      | 20.5 (17.2–23.8)         | 179.5% (147.3 to 219.8%)  | 73.7 (61.9–85.8)      | 20.7% (6.3 to 39%)       | 0.69      |
|                      | Palestine                    | 1.5 (1.3–1.8)            | 158.4% (129.8 to 188.4%)  | 78.3 (65.2–92.4)      | 2.1% (-8.8 to 14.4%)     | 0.69      |
|                      | Oman                         | 1.4 (1.1–1.7)            | 213.3% (180.9 to 249%)    | 112.5 (92.9–135.2)    | 28% (14 to 44.8%)        | 0.62      |
| Qatar                | 0.8 (0.6–1)                  | 811.6% (709.6 to 914.7%) | 119.3 (98.3–142.9)        | 20.2% (6.9 to 36.3%)  | 0.89                     |           |
| Saudi Arabia         | 13.3 (11–15.9)               | 233.9% (195.1 to 279.3%) | 107.6 (90.4–127.8)        | 27.7% (13.1 to 45%)   | 0.6                      |           |
| Syrian Arab Republic | 8.3 (6.9–9.9)                | 160.5% (132.4 to 191.7%) | 81.6 (67.8–97)            | 11.6% (-1.3 to 26.8%) | 0.75                     |           |
| Tunisia              | 9.3 (7.8–10.9)               | 208.5% (170.6 to 249.5%) | 79.6 (66.9–93.2)          | 15.1% (1.8 to 30.4%)  | 0.73                     |           |
| Türkiye              | 72.5 (59.4–86.8)             | 225% (194.8 to 259.1%)   | 86.9 (71–104.1)           | 22.3% (10.9 to 35.5%) | 0.71                     |           |
| United Arab Emirates | 3.1 (2.5–3.9)                | 901% (789.1 to 1022.1%)  | 116 (97.6–138.8)          | 11.8% (0.6 to 23.6%)  | 0.79                     |           |
| Yemen                | 7.2 (5.9–8.7)                | 205.1% (175.4 to 242%)   | 63.6 (51.9–76.4)          | 9.7% (-1.8 to 24.7%)  | 0.76                     |           |
| Afghanistan          | 7.4 (6.1–8.8)                | 61.8% (44.4 to 82.4%)    | 69.3 (58.2–82.4)          | -3.3% (-12.9 to 8%)   | 0.72                     |           |
| Sudan                | 11.4 (9.5–13.7)              | 102.4% (78.9 to 129.8%)  | 69.7 (58.3–83.4)          | 2.1% (-9.9 to 16.1%)  | 0.7                      |           |
| Idiopathic epilepsy  | Global                       | 25111.1 (19033.6–31433)  | 63.9% (39.3 to 93%)       | 326.3 (247.8–408.3)   | 13% (-3.4 to 31.8%)      | 0.92      |
|                      | North Africa and Middle East | 1990.9 (1360.2–2600)     | 77.6% (26.2 to 150.6%)    | 336.9 (231.8–437.4)   | 8.6% (-23 to 52.4%)      | 0.88      |
|                      | Algeria                      | 131.1 (38.6–215)         | 40.1% (-62.6 to 496.7%)   | 322.5 (94.5–529.8)    | -7.9% (-76.4 to 293%)    | 0.93      |
|                      | Bahrain                      | 5.5 (1.7–9.1)            | 143.6% (-26.4 to 883.4%)  | 450.6 (140.2–726.5)   | -10.6% (-72.9 to 252.3%) | 0.94      |
|                      | Egypt                        | 274.8 (77.9–460.8)       | 84.3% (-49.4 to 746%)     | 275.4 (79.2–459.6)    | 8.2% (-70.5 to 395%)     | 0.79      |
|                      | Iran                         | 281.7 (193–373.6)        | 28.3% (-5.1 to 72.5%)     | 352.8 (240.3–465.2)   | 1.5% (-24 to 35.3%)      | 0.88      |
|                      | Iraq                         | 126.9 (33.6–217.4)       | 125.5% (-39.4 to 851.8%)  | 299.1 (77.8–510.2)    | -3.3% (-74.2 to 300.6%)  | 0.93      |
|                      | Jordan                       | 35.4 (9.7–59.7)          | 204.5% (-20.6 to 1036.4%) | 302.9 (83.8–498.4)    | 3.5% (-73.1 to 291.1%)   | 0.9       |
|                      | Kuwait                       | 15.2 (4.3–24.1)          | 119.1% (-37.4 to 718.6%)  | 388.9 (106.7–618.4)   | -4.5% (-73.2 to 267.1%)  | 0.92      |
|                      | Lebanon                      | 17.5 (5.1–28.2)          | 56.4% (-59.4 to 598.3%)   | 343.8 (99.5–558.2)    | 3.3% (-72.7 to 371.4%)   | 0.89      |
|                      | Libya                        | 18.5 (6.1–29.2)          | 25.6% (-59.8 to 364%)     | 287.1 (93.7–450.4)    | -15.5% (-72.8 to 217.9%) | 0.88      |
|                      | Morocco                      | 103.3 (24.8–182.3)       | 55.2% (-62.8 to 593%)     | 295.3 (70.8–519.2)    | 16.6% (-72.4 to 416.5%)  | 0.98      |
|                      | Palestine                    | 15.2 (4–25.7)            | 137.7% (-41.1 to 1001.8%) | 301.3 (78.4–510.7)    | 2.2% (-74.3 to 374.9%)   | 0.93      |
|                      | Oman                         | 14 (4.3–22.8)            | 153% (-24.4 to 892.3%)    | 339.1 (106.3–548.8)   | 20.3% (-65.1 to 372.1%)  | 0.91      |
|                      | Qatar                        | 9.5 (3.1–15.5)           | 484.5% (71.8 to 2028.4%)  | 397.3 (130.2–630.9)   | -1.7% (-71 to 262.2%)    | 1.04      |
|                      | Saudi Arabia                 | 187.6 (56.2–294)         | 209.3% (-14.6 to 1107.1%) | 563.3 (162.9–883.2)   | 41.8% (-60.1 to 462.6%)  | 1.02      |
|                      | Syrian Arab Republic         | 39.1 (11.4–66.2)         | 18.9% (-68.8 to 447.1%)   | 269.8 (79.6–454.1)    | 13.8% (-70.2 to 417.4%)  | 0.93      |
|                      | Tunisia                      | 31.1 (8.9–50.4)          | 47.6% (-64 to 534.6%)     | 279.7 (79.6–456.8)    | 16.3% (-72.2 to 395.8%)  | 0.96      |
|                      | Türkiye                      | 373.6 (110.8–580.8)      | 57.9% (-53.3 to 564.8%)   | 476 (143.4–741.4)     | 23.8% (-62.6 to 422.5%)  | 0.8       |
|                      | United Arab Emirates         | 38 (11.1–60.6)           | 306.1% (16 to 1404.2%)    | 491.9 (143–776.3)     | -13.1% (-74.9 to 216.9%) | 0.84      |
|                      | Yemen                        | 72.9 (18–135.4)          | 113.8% (-55.2 to 1082%)   | 220.1 (53.2–403.6)    | -3.3% (-79.5 to 439.8%)  | 0.89      |
|                      | Afghanistan                  | 93.8 (16.7–183.1)        | 204.7% (-33.9 to 1912.6%) | 234.4 (41.5–453.3)    | -9.9% (-80.5 to 489.9%)  | 1.09      |

**Table S11** Cause- and sex-specific burden, mortality, incidence, and prevalence of neurological conditions in North Africa and Middle East countries

| Measure            |                              | All Ages                       |                                     | Age-standardised          |                                     | Sex ratio<br>2019 |
|--------------------|------------------------------|--------------------------------|-------------------------------------|---------------------------|-------------------------------------|-------------------|
|                    |                              | Number (thousand)<br>2019      | Percent change<br>From 1990 to 2019 | Rate per 100,000<br>2019  | Percent change<br>From 1990 to 2019 |                   |
| Cause              | Location                     | Mean (95% UI)                  | Mean (95% UI)                       | Mean (95% UI)             | Mean (95% UI)                       | F:M               |
| Multiple sclerosis | Sudan                        | 104.1 (25.3–187.3)             | 110.9% (-49.8 to 1029.8%)           | 245.5 (60.3–444.7)        | 8.5% (-73.9 to 482%)                | 0.87              |
|                    | Global                       | 1756.8 (1531.9–1973.6)         | 71.7% (66.3 to 76.8%)               | 21.3 (18.5–23.9)          | -6.2% (-8.7 to -3.8%)               | 1.99              |
|                    | North Africa and Middle East | 222.7 (190.7–256.8)            | 171.3% (165.8 to 176.5%)            | 39 (33.6–44.7)            | 11.5% (10 to 12.8%)                 | 1.98              |
|                    | Algeria                      | 17.6 (14.4–21.3)               | 222.5% (203.8 to 242%)              | 41.9 (34.2–50.6)          | 26.4% (20.4 to 33.6%)               | 1.98              |
|                    | Bahrain                      | 0.6 (0.5–0.7)                  | 484.5% (438.6 to 535.1%)            | 32.7 (26.3–40.3)          | 29.1% (21.6 to 36.4%)               | 2.06              |
|                    | Egypt                        | 17.8 (14–21.6)                 | 160.1% (150 to 171.7%)              | 20.6 (16.4–25)            | 22.2% (17.7 to 27.4%)               | 1.98              |
|                    | Iran                         | 46.9 (39.9–53.7)               | 135.2% (124.4 to 145.7%)            | 51.2 (44.1–58.5)          | -4.9% (-8.2 to -1.6%)               | 2.09              |
|                    | Iraq                         | 12.8 (10.1–16.1)               | 274.2% (256.6 to 293.6%)            | 37.8 (30–46.9)            | 19.5% (14.2 to 25.2%)               | 1.93              |
|                    | Jordan                       | 4.6 (3.7–5.6)                  | 345.7% (289.6 to 401.1%)            | 47 (37.9–56.8)            | -1.2% (-13.3 to 10.6%)              | 2.07              |
|                    | Kuwait                       | 2.7 (2.2–3.3)                  | 485.7% (448.8 to 526.8%)            | 53 (43.7–63.5)            | 59.7% (50.5 to 69.9%)               | 1.68              |
|                    | Lebanon                      | 2.9 (2.4–3.5)                  | 179.2% (162.9 to 199.5%)            | 53.9 (43.9–64.2)          | 34.7% (27.2 to 43.9%)               | 1.95              |
|                    | Libya                        | 3 (2.5–3.6)                    | 261.2% (240.2 to 282.5%)            | 41.1 (34.2–48.9)          | 31.6% (24.9 to 38.4%)               | 1.82              |
|                    | Morocco                      | 15 (12.2–18.3)                 | 151.6% (136.6 to 168.2%)            | 40.9 (33.3–49.7)          | 26.4% (19.3 to 34.6%)               | 1.96              |
|                    | Palestine                    | 1.5 (1.2–1.8)                  | 268% (252.9 to 286.8%)              | 41.5 (33.6–50.2)          | 18.5% (13.9 to 24.3%)               | 1.78              |
|                    | Oman                         | 1.5 (1.2–1.8)                  | 352.9% (326.2 to 381.2%)            | 34.3 (28.3–41)            | 33.8% (27.2 to 41.9%)               | 1.69              |
|                    | Qatar                        | 1.8 (1.6–2)                    | 1183.7% (988.2 to 1408.8%)          | 56.1 (49.2–62.9)          | 54.1% (34 to 77.5%)                 | 2.58              |
|                    | Saudi Arabia                 | 10.8 (8.3–13.6)                | 364.9% (340 to 389.3%)              | 28.4 (22.4–35.2)          | 29.7% (23.9 to 35.9%)               | 2.13              |
|                    | Syrian Arab Republic         | 5.9 (4.7–7.2)                  | 130.5% (117.5 to 143.2%)            | 42.1 (33.4–51.5)          | 23.8% (18.6 to 28.4%)               | 2.1               |
|                    | Tunisia                      | 6.6 (5.4–7.9)                  | 170.3% (156.3 to 186.2%)            | 49.7 (40.8–59.8)          | 28.4% (22.4 to 34.2%)               | 1.95              |
|                    | Türkiye                      | 45.8 (43.9–47.9)               | 110.2% (105.2 to 115.9%)            | 48.7 (46.7–50.9)          | 2.5% (0.1 to 5%)                    | 1.78              |
|                    | United Arab Emirates         | 3.1 (2.6–3.7)                  | 709.6% (610.3 to 804.1%)            | 23.8 (20.5–27.5)          | -0.9% (-9.2 to 7.7%)                | 1.82              |
|                    | Yemen                        | 5 (4–6.2)                      | 253.5% (235.8 to 271.5%)            | 23.3 (18.6–28.4)          | 22.9% (16.8 to 29.2%)               | 1.72              |
|                    | Afghanistan                  | 10 (8.2–12.1)                  | 259.8% (239.6 to 281.6%)            | 43.1 (36–51.2)            | 19.9% (13.6 to 25.7%)               | 2.06              |
|                    | Sudan                        | 6.7 (5.3–8.3)                  | 180% (166.4 to 195%)                | 23.1 (18.5–27.9)          | 23.9% (18.2 to 30.7%)               | 1.74              |
| Migraine           | Global                       | 1128087.3 (979598.8–1298138.1) | 56.3% (52.3 to 60.5%)               | 14107.3 (12270.3–16239)   | 1.7% (0.7 to 2.8%)                  | 1.73              |
|                    | North Africa and Middle East | 96931.5 (83756.7–112609.4)     | 100.9% (92.7 to 108.8%)             | 15355 (13305.5–17806)     | -0.1% (-1.5 to 1.4%)                | 1.76              |
|                    | Algeria                      | 6629.2 (5653–7727.2)           | 87.9% (76.8 to 98.6%)               | 15365.7 (13120.8–17933.6) | -0.1% (-0.2 to 0%)                  | 1.72              |
|                    | Bahrain                      | 239.7 (205.3–279.9)            | 215.9% (197.3 to 237.3%)            | 14419.8 (12318.8–16876.2) | -0.7% (-1 to -0.3%)                 | 1.72              |
|                    | Egypt                        | 15818.7 (13828.6–18240.8)      | 97.4% (83.2 to 112.2%)              | 15809.3 (13960.9–18055.5) | 1.8% (-5 to 9%)                     | 1.82              |
|                    | Iran                         | 14579.4 (12748–16638)          | 75.8% (63.4 to 88.4%)               | 16048.8 (14063.2–18371.8) | -0.5% (-4 to 2.8%)                  | 1.76              |
|                    | Iraq                         | 6522.5 (5506.5–7700.2)         | 179.5% (170.3 to 187.6%)            | 15300.4 (13067–17857.9)   | -0.1% (-0.1 to -0.1%)               | 1.72              |
|                    | Jordan                       | 1789.5 (1517.3–2114.9)         | 247.9% (233.8 to 262.4%)            | 15033 (12863.2–17565.4)   | -1% (-1.1 to -0.8%)                 | 1.72              |
|                    | Kuwait                       | 764.4 (652.8–896.7)            | 189.8% (171.5 to 208.5%)            | 14884.8 (12735.9–17378.9) | 3.7% (-0.5 to 7.9%)                 | 1.69              |
|                    | Lebanon                      | 819.1 (700.6–950.6)            | 75.4% (68.5 to 81.6%)               | 15516.6 (13250.8–18080.2) | 0.2% (0 to 0.4%)                    | 1.72              |
|                    | Libya                        | 1150 (980.2–1340.8)            | 102.9% (88.9 to 116.4%)             | 15252.6 (13031.9–17806.7) | 1.9% (1.6 to 2.2%)                  | 1.72              |
|                    | Morocco                      | 5801.2 (4955.3–6762.3)         | 57.5% (50.8 to 63.8%)               | 15400.4 (13149.2–17963.3) | -0.3% (-0.4 to -0.3%)               | 1.72              |
|                    | Palestine                    | 736.1 (619.2–875.3)            | 176.4% (169.4 to 183%)              | 15338.5 (13096.5–17900)   | -1.2% (-1.4 to -0.9%)               | 1.72              |
|                    | Oman                         | 721.3 (607.2–849.2)            | 182.6% (166.6 to 197.2%)            | 14081.2 (12028–16515.9)   | -1.5% (-1.8 to -1.2%)               | 1.72              |

**Table S11** Cause- and sex-specific burden, mortality, incidence, and prevalence of neurological conditions in North Africa and Middle East countries

| Measure               | Cause | Location                     | All Ages                        |                                     | Age-standardised          |                                     | Sex ratio<br>2019<br>F:M |
|-----------------------|-------|------------------------------|---------------------------------|-------------------------------------|---------------------------|-------------------------------------|--------------------------|
|                       |       |                              | Number (thousand)<br>2019       | Percent change<br>From 1990 to 2019 | Rate per 100,000<br>2019  | Percent change<br>From 1990 to 2019 |                          |
|                       |       |                              | Mean (95% UI)                   | Mean (95% UI)                       | Mean (95% UI)             | Mean (95% UI)                       |                          |
|                       |       | Qatar                        | 457.4 (385.3–540.2)             | 596.8% (576 to 614.3%)              | 13295.3 (11309.2–15700.9) | -2.7% (-3.3 to -2.2%)               | 1.72                     |
|                       |       | Saudi Arabia                 | 5954.6 (5057.3–6988.8)          | 173.9% (151.3 to 195.1%)            | 14325.3 (12266.3–16709.6) | -1.3% (-5.2 to 2.8%)                | 1.57                     |
|                       |       | Syrian Arab Republic         | 2354 (2000.1–2775.1)            | 38.7% (31.9 to 46.1%)               | 15691 (13390.1–18304.1)   | 2.5% (2 to 2.9%)                    | 1.72                     |
|                       |       | Tunisia                      | 1889.8 (1626.6–2191.2)          | 54% (45.3 to 62.5%)                 | 15455 (13195.2–18014.9)   | 0.4% (0.4 to 0.5%)                  | 1.72                     |
|                       |       | Türkiye                      | 13296.1 (11425.7–15392.4)       | 55.1% (45.5 to 65.2%)               | 14888.4 (12817.8–17240.8) | 0% (-4.1 to 4.2%)                   | 1.93                     |
|                       |       | United Arab Emirates         | 1521.8 (1290.3–1798.7)          | 466.6% (428.2 to 509.6%)            | 13693.4 (11674.5–16104.4) | -0.7% (-1.1 to -0.3%)               | 1.72                     |
|                       |       | Yemen                        | 4554 (3811.6–5444.9)            | 168.1% (161.7 to 173.9%)            | 15398.5 (13147.1–17961.2) | 0% (-0.1 to 0.1%)                   | 1.72                     |
|                       |       | Afghanistan                  | 5201.9 (4319.1–6245.2)          | 240.2% (231.8 to 247.4%)            | 15315.6 (13076.7–17870.6) | -2.3% (-2.7 to -1.8%)               | 1.72                     |
|                       |       | Sudan                        | 6032.2 (5066.7–7200.2)          | 121.7% (118.9 to 124.1%)            | 15412 (13164.6–17974.7)   | -0.2% (-0.3 to -0.1%)               | 1.72                     |
| Tension-type headache |       | Global                       | 1995172.5 (1751946.8–2242204.9) | 52.6% (49.2 to 55.9%)               | 25113.5 (22020.8–28316.2) | -0.8% (-1.5 to 0%)                  | 1.06                     |
|                       |       | North Africa and Middle East | 149061.7 (128455.9–170990.9)    | 102.2% (93.5 to 111%)               | 24504.5 (21304.8–27987.5) | 2% (0.7 to 3.4%)                    | 1.02                     |
|                       |       | Algeria                      | 9888 (8443.6–11527.6)           | 85.5% (74.2 to 98.1%)               | 23647.6 (20341.2–27276.9) | -0.1% (-0.1 to 0%)                  | 1.02                     |
|                       |       | Bahrain                      | 377.8 (318.5–442.8)             | 224.3% (196.2 to 253%)              | 23716 (20422–27274.1)     | -0.1% (-0.3 to 0.1%)                | 1.02                     |
|                       |       | Egypt                        | 25094.8 (21538.9–28759.9)       | 97.1% (85.8 to 108.5%)              | 26290.9 (22878.1–29775.3) | 3.6% (-1.6 to 9.5%)                 | 1.04                     |
|                       |       | Iran                         | 25773 (22795.1–28770)           | 88.3% (74.4 to 101.8%)              | 29640.4 (26202.1–32949.4) | 9.7% (6.5 to 13.1%)                 | 0.99                     |
|                       |       | Iraq                         | 9672.8 (8160.2–11338.8)         | 173.9% (163.8 to 183.3%)            | 23667.9 (20363.1–27281.6) | 0% (0 to 0%)                        | 1.02                     |
|                       |       | Jordan                       | 2700.1 (2285.9–3158.5)          | 248.3% (232.6 to 266.5%)            | 23661.5 (20365.4–27259.2) | 0.1% (0 to 0.2%)                    | 1.02                     |
|                       |       | Kuwait                       | 1117.9 (946.8–1313.4)           | 175.2% (156.1 to 195.5%)            | 23533 (20134.8–26965.1)   | -0.9% (-4.9 to 3%)                  | 1.05                     |
|                       |       | Lebanon                      | 1237.3 (1062–1432.4)            | 75.6% (67.8 to 83.6%)               | 23655 (20353.1–27281.3)   | 0.1% (0 to 0.3%)                    | 1.02                     |
|                       |       | Libya                        | 1698.7 (1444.4–1978.9)          | 94.9% (81.4 to 109.5%)              | 23667.9 (20357.9–27281.4) | -0.1% (-0.2 to 0.1%)                | 1.02                     |
|                       |       | Morocco                      | 8691.6 (7444.1–10049.1)         | 58.2% (51.7 to 65.2%)               | 23654.8 (20352.1–27282.8) | 0% (-0.1 to 0%)                     | 1.02                     |
|                       |       | Palestine                    | 1094.4 (921–1287.9)             | 172.3% (164.6 to 180.4%)            | 23661.8 (20360.3–27277.7) | 0% (-0.2 to 0.1%)                   | 1.02                     |
|                       |       | Oman                         | 1138.7 (948.5–1361.3)           | 181.2% (161.5 to 199.9%)            | 23692.5 (20423.5–27194.2) | -0.1% (-0.3 to 0%)                  | 1.02                     |
|                       |       | Qatar                        | 756.4 (622.3–910.8)             | 614.6% (587.5 to 637.7%)            | 23538.3 (20220.1–27033.6) | -0.5% (-0.9 to -0.2%)               | 1.02                     |
|                       |       | Saudi Arabia                 | 8354.7 (7033.6–9767.9)          | 162.3% (142.1 to 182.5%)            | 21757.9 (18684.4–24972.1) | -2.7% (-7 to 2%)                    | 1.01                     |
|                       |       | Syrian Arab Republic         | 3507.8 (2996.7–4066.4)          | 36.6% (28.8 to 44.8%)               | 23640.6 (20306.7–27263.7) | 0% (-0.3 to 0.3%)                   | 1.02                     |
|                       |       | Tunisia                      | 2863.7 (2464.9–3296.8)          | 55% (45.8 to 64.3%)                 | 23657.2 (20350.7–27289)   | 0.1% (0 to 0.1%)                    | 1.02                     |
|                       |       | Türkiye                      | 19035.8 (16410–21823.2)         | 57.2% (45.8 to 67.8%)               | 21726.3 (18745.7–24838.8) | 1% (-2.9 to 5.2%)                   | 1.02                     |
|                       |       | United Arab Emirates         | 2512.6 (2048.3–3008.5)          | 483.1% (427 to 537.9%)              | 23676 (20386.9–27204.5)   | -0.2% (-0.5 to 0%)                  | 1.02                     |

**Table S11** Cause- and sex-specific burden, mortality, incidence, and prevalence of neurological conditions in North Africa and Middle East countries

| Measure                      | Cause | Location                     | All Ages                  |                                     | Age-standardised          |                                     | Sex ratio<br>2019<br>F:M |
|------------------------------|-------|------------------------------|---------------------------|-------------------------------------|---------------------------|-------------------------------------|--------------------------|
|                              |       |                              | Number (thousand)<br>2019 | Percent change<br>From 1990 to 2019 | Rate per 100,000<br>2019  | Percent change<br>From 1990 to 2019 |                          |
|                              |       |                              | Mean (95% UI)             | Mean (95% UI)                       | Mean (95% UI)             | Mean (95% UI)                       |                          |
|                              |       | Yemen                        | 6749 (5678·8–8024)        | 162·7% (155·4 to 169·6%)            | 23663 (20359·2–27287·1)   | 0% (-0·1 to 0·1%)                   | 1·02                     |
|                              |       | Afghanistan                  | 7750·9 (6436·5–9231·4)    | 234·6% (222·8 to 246·5%)            | 23693·8 (20386·8–27306·9) | 0·4% (0·1 to 0·7%)                  | 1·02                     |
|                              |       | Sudan                        | 8894 (7481·3–10475·8)     | 118·3% (115·4 to 121·4%)            | 23598·8 (20291–27242·1)   | -0·1% (-0·2 to -0·1%)               | 1·02                     |
| Motor neuron disease         |       | Global                       | 268·7 (231·9–310·7)       | 68·9% (62·5 to 75·7%)               | 3·4 (2·9–3·9)             | 1·9% (0·6 to 3·4%)                  | 0·82                     |
|                              |       | North Africa and Middle East | 15·6 (12·7–19)            | 103·3% (92·1 to 113·8%)             | 2·6 (2·1–3·1)             | 3·5% (2 to 5·1%)                    | 0·86                     |
|                              |       | Algeria                      | 1 (0·8–1·2)               | 89·8% (74·6 to 104·9%)              | 2·4 (1·9–2·8)             | 2% (-1·6 to 5·7%)                   | 0·85                     |
|                              |       | Bahrain                      | <0·1 (<0·1–0·1)           | 235·2% (197·8 to 274·8%)            | 2·8 (2·3–3·4)             | 3·7% (-0·5 to 7·9%)                 | 0·86                     |
|                              |       | Egypt                        | 2·1 (1·7–2·6)             | 96·4% (87·1 to 105·5%)              | 2·2 (1·8–2·7)             | 4·2% (0·6 to 8·2%)                  | 0·87                     |
|                              |       | Iran                         | 2·5 (2·3–2)               | 86·9% (70·6 to 103·5%)              | 2·9 (2·3–3·5)             | 6·6% (4·9 to 8·4%)                  | 0·89                     |
|                              |       | Iraq                         | 1 (0·8–1·3)               | 170·7% (154·7 to 186·6%)            | 2·5 (2·1–3·1)             | 2·6% (-1·2 to 6·4%)                 | 0·88                     |
|                              |       | Jordan                       | 0·3 (0·2–0·4)             | 252% (224·4 to 277·9%)              | 2·7 (2·2–3·3)             | 3% (-1·7 to 7·2%)                   | 0·84                     |
|                              |       | Kuwait                       | 0·2 (0·1–0·2)             | 166·7% (143·3 to 192·9%)            | 3·1 (2·6–3·8)             | -4·2% (-9·8 to 1·1%)                | 0·85                     |
|                              |       | Lebanon                      | 0·1 (0·1–0·2)             | 77·2% (65·9 to 87·5%)               | 2·8 (2·3–3·4)             | 2·8% (-1 to 6·9%)                   | 0·87                     |
|                              |       | Libya                        | 0·2 (0·1–0·2)             | 81·7% (64·2 to 98·3%)               | 2·3 (1·9–2·8)             | -4·9% (-8·6 to -0·9%)               | 0·91                     |
|                              |       | Morocco                      | 0·9 (0·7–1·1)             | 62·3% (51·4 to 73·3%)               | 2·4 (1·9–2·9)             | 4% (0 to 8%)                        | 0·84                     |
|                              |       | Palestine                    | 0·1 (0·1–0·1)             | 175·2% (158·3 to 189·6%)            | 2·6 (2·1–3·2)             | 4% (0 to 7·7%)                      | 0·89                     |
|                              |       | Oman                         | 0·1 (0·1–0·1)             | 182·6% (159·7 to 207·3%)            | 2·3 (1·9–2·8)             | 2·7% (-1·3 to 6·9%)                 | 0·87                     |
|                              |       | Qatar                        | 0·1 (0·1–0·1)             | 631·5% (587·1 to 678·9%)            | 2·8 (2·3–3·5)             | 4·2% (-0·3 to 8·7%)                 | 0·86                     |
|                              |       | Saudi Arabia                 | 0·9 (0·7–1·2)             | 166·9% (141·5 to 192·2%)            | 2·4 (2–2·9)               | 2·9% (-0·9 to 6·8%)                 | 0·85                     |
|                              |       | Syrian Arab Republic         | 0·4 (0·3–0·5)             | 28·3% (17·7 to 41·1%)               | 2·5 (2·1–3·1)             | 0·4% (-3·4 to 4·6%)                 | 0·87                     |
|                              |       | Tunisia                      | 0·3 (0·3–0·4)             | 61·1% (48·2 to 75·5%)               | 2·7 (2·2–3·3)             | 4·1% (-0·5 to 8·1%)                 | 0·89                     |
|                              |       | Türkiye                      | 3·2 (2·6–3·7)             | 77·2% (64·6 to 89·4%)               | 3·6 (3–4·2)               | 10·2% (6·2 to 14·5%)                | 0·83                     |
|                              |       | United Arab Emirates         | 0·3 (0·2–0·4)             | 472·2% (400 to 543·2%)              | 2·7 (2·2–3·2)             | -0·5% (-4·4 to 4·5%)                | 0·87                     |
|                              |       | Yemen                        | 0·5 (0·4–0·6)             | 153·1% (137·6 to 168·2%)            | 1·6 (1·3–2)               | -0·8% (-4·5 to 3·2%)                | 0·86                     |
|                              |       | Afghanistan                  | 0·7 (0·5–0·8)             | 238·4% (219·8 to 260%)              | 1·9 (1·6–2·4)             | 0·2% (-4 to 4·2%)                   | 0·82                     |
|                              |       | Sudan                        | 0·6 (0·5–0·8)             | 123·4% (113·4 to 134·2%)            | 1·7 (1·4–2·1)             | 4·1% (0·4 to 8·2%)                  | 0·86                     |
| Other neurological disorders |       | Global                       | 56·9 (39·1–77·8)          | 66·3% (56·8 to 77%)                 | 0·7 (0·5–1)               | 6·4% (3·6 to 9·5%)                  | 0·82                     |
|                              |       | North Africa and Middle East | 3·9 (2·6–5·5)             | 96·6% (81 to 113·8%)                | 0·7 (0·5–1)               | 0·3% (-0·9 to 1·5%)                 | 1·00                     |
|                              |       | Algeria                      | 0·3 (0·2–0·4)             | 91·2% (70·5 to 114·3%)              | 0·7 (0·5–1)               | -0·1% (-0·2 to 0·1%)                | 1·00                     |
|                              |       | Bahrain                      | <0·1 (<0·1–<0·1)          | 251·2% (197·9 to 315·7%)            | 0·7 (0·5–0·9)             | -0·4% (-0·9 to 0%)                  | 1·00                     |
|                              |       | Egypt                        | 0·6 (0·4–0·9)             | 88·8% (80·3 to 97·3%)               | 0·7 (0·5–1)               | 0% (-0·2 to 0·3%)                   | 1·00                     |
|                              |       | Iran                         | 0·5 (0·4–0·8)             | 69·6% (46·7 to 96·5%)               | 0·6 (0·4–0·9)             | 0·2% (-0·1 to 0·4%)                 | 0·97                     |
|                              |       | Iraq                         | 0·3 (0·2–0·4)             | 156·2% (137·6 to 177·1%)            | 0·7 (0·5–1)               | 0% (0 to 0%)                        | 1·00                     |
|                              |       | Jordan                       | 0·1 (0·1–0·1)             | 288·5% (245 to 338·6%)              | 0·9 (0·6–1·2)             | 11·4% (3·6 to 20·5%)                | 1·02                     |
|                              |       | Kuwait                       | <0·1 (<0·1–<0·1)          | 197·2% (159·5 to 237·8%)            | 0·7 (0·5–1)               | 2% (-4 to 9·2%)                     | 0·99                     |
|                              |       | Lebanon                      | <0·1 (<0·1–<0·1)          | 74·9% (63·2 to 87·3%)               | 0·7 (0·5–1)               | 0·2% (-0·1 to 0·6%)                 | 1·00                     |
|                              |       | Libya                        | <0·1 (<0·1–0·1)           | 126·5% (89·7 to 177·6%)             | 0·6 (0·4–0·9)             | 19·1% (6·4 to 36·4%)                | 0·98                     |
|                              |       | Morocco                      | 0·2 (0·2–0·3)             | 63% (48·7 to 78·5%)                 | 0·7 (0·5–1)               | 0% (-0·1 to 0·1%)                   | 1·00                     |
|                              |       | Palestine                    | <0·1 (<0·1–<0·1)          | 154% (137·8 to 173·2%)              | 0·7 (0·5–1)               | -0·5% (-1 to -0·1%)                 | 1·00                     |
|                              |       | Oman                         | <0·1 (<0·1–<0·1)          | 153·2% (121·5 to 186·7%)            | 0·7 (0·5–0·9)             | -0·2% (-0·5 to 0·1%)                | 1·00                     |
|                              |       | Qatar                        | <0·1 (<0·1–<0·1)          | 591·6% (536·1 to 640·5%)            | 0·7 (0·5–0·9)             | 0·3% (-0·3 to 1%)                   | 1·00                     |
|                              |       | Saudi Arabia                 | 0·2 (0·1–0·3)             | 153·9% (116·9 to 194·2%)            | 0·7 (0·5–1)               | 0·3% (0·1 to 0·4%)                  | 1·00                     |
|                              |       | Syrian Arab Republic         | 0·1 (0·1–0·1)             | 36·5% (18·7 to 57·6%)               | 0·7 (0·5–1)               | -0·1% (-0·4 to 0·3%)                | 1·00                     |
|                              |       | Tunisia                      | 0·1 (0·1–0·1)             | 64·4% (46·9 to 83%)                 | 0·7 (0·5–1)               | 0% (-0·2 to 0·1%)                   | 1·00                     |
|                              |       | Türkiye                      | 0·6 (0·4–0·9)             | 62·4% (44·5 to 81%)                 | 0·7 (0·5–1)               | 0·8% (-5 to 7·6%)                   | 1·03                     |
|                              |       | United Arab Emirates         | 0·1 (0–0·1)               | 496·2% (395·1 to 607%)              | 0·7 (0·5–0·9)             | -0·1% (-0·6 to 0·4%)                | 1·00                     |
|                              |       | Yemen                        | 0·2 (0·1–0·3)             | 140·3% (125·8 to 156·2%)            | 0·7 (0·5–1)               | 0·3% (0 to 0·5%)                    | 1·00                     |



**Table S11** Cause- and sex-specific burden, mortality, incidence, and prevalence of neurological conditions in North Africa and Middle East countries

| Measure                                   | Cause                        | Location                      | All Ages                               |                                     | Age-standardised              |                                     | Sex ratio<br>2019<br>F:M |
|-------------------------------------------|------------------------------|-------------------------------|----------------------------------------|-------------------------------------|-------------------------------|-------------------------------------|--------------------------|
|                                           |                              |                               | Number (thousand)<br>2019              | Percent change<br>From 1990 to 2019 | Rate per 100,000<br>2019      | Percent change<br>From 1990 to 2019 |                          |
|                                           |                              |                               | Mean (95% UI)                          | Mean (95% UI)                       | Mean (95% UI)                 | Mean (95% UI)                       |                          |
| Headache disorders                        | Afghanistan                  |                               | 0.2 (0.1–0.3)                          | 207.4% (183.1 to 228.1%)            | 0.7 (0.5–1)                   | -0.3% (-0.8 to 0.2%)                | 1.00                     |
|                                           | Sudan                        |                               | 0.2 (0.2–0.3)                          | 106.7% (99.4 to 114.7%)             | 0.7 (0.5–1)                   | 0% (-0.1 to 0.2%)                   | 1.00                     |
|                                           | Global                       |                               | 2602898.1<br>(2396738.3–<br>2805119.6) | 54% (51.5 to 56.5%)                 | 32716.8 (30148.4–<br>35335)   | 0.2% (-0.3 to 0.8%)                 | 1.2                      |
|                                           | North Africa and Middle East |                               | 205280.4 (186994.5–<br>223750.1)       | 100.9% (95.4 to 106.3%)             | 33389.7 (30530.9–<br>36328.1) | 1.3% (0.5 to 2.2%)                  | 1.19                     |
|                                           | Algeria                      |                               | 13831.1 (12549.8–<br>15188.5)          | 85.9% (78.2 to 93.4%)               | 32788.5 (29733.8–<br>35917.9) | 0.1% (-0.4 to 0.7%)                 | 1.19                     |
|                                           | Bahrain                      |                               | 517.8 (467–570.9)                      | 221.6% (205 to 238.3%)              | 32232.2 (29237–<br>35273.3)   | -0.1% (-0.6 to 0.5%)                | 1.19                     |
|                                           | Egypt                        |                               | 33951.1 (31033.2–<br>36963)            | 96.5% (89.3 to 104.5%)              | 35022.4 (32158–<br>37899.9)   | 2.7% (-0.8 to 6.7%)                 | 1.21                     |
|                                           | Iran                         |                               | 32958.4 (30482.4–<br>35496.7)          | 81% (72.7 to 89.6%)                 | 37542.1 (34654.1–<br>40354.8) | 5.4% (3.5 to 7.5%)                  | 1.15                     |
|                                           | Iraq                         |                               | 13572.5 (12216.2–<br>14975.5)          | 175.3% (169.1 to 181.8%)            | 32763.7 (29727.1–<br>35826.9) | 0.2% (-0.3 to 0.7%)                 | 1.19                     |
|                                           | Jordan                       |                               | 3770.8 (3396.2–<br>4150.4)             | 247.8% (237.5 to 258.9%)            | 32603.8 (29560.1–<br>35676.2) | 0% (-0.6 to 0.5%)                   | 1.19                     |
|                                           | Kuwait                       |                               | 1571.2 (1423.1–<br>1732.6)             | 179.9% (167.6 to 192.2%)            | 32425.7 (29466.2–<br>35506.5) | 0.8% (-1.8 to 3.3%)                 | 1.2                      |
|                                           | Lebanon                      |                               | 1724.5 (1566.6–<br>1888.7)             | 75.3% (70.5 to 80.2%)               | 32916.6 (29885.3–<br>36014.1) | 0.4% (-0.1 to 0.9%)                 | 1.19                     |
|                                           | Libya                        |                               | 2382.1 (2156.1–<br>2608.3)             | 96.7% (87.5 to 105.6%)              | 32752.8 (29720–<br>35810.4)   | 0.8% (0.3 to 1.3%)                  | 1.19                     |
|                                           | Morocco                      |                               | 12136.8 (10998.9–<br>13271.3)          | 57.9% (53.2 to 62.5%)               | 32787.8 (29774–<br>35877.7)   | 0.1% (-0.4 to 0.6%)                 | 1.19                     |
|                                           | Palestine                    |                               | 1536 (1378–1697)                       | 173.5% (168.3 to 178.6%)            | 32770.6 (29756.4–<br>35868.7) | -0.1% (-0.7 to 0.4%)                | 1.19                     |
|                                           | Oman                         |                               | 1560 (1397.9–1741.2)                   | 180.6% (168.5 to 193.2%)            | 32016.9 (29024.5–<br>35062.5) | -0.1% (-0.8 to 0.5%)                | 1.19                     |
|                                           | Qatar                        |                               | 1020.5 (913.9–1140.9)                  | 609.4% (592.3 to 625.7%)            | 31367.7 (28394.9–<br>34336.2) | -0.8% (-1.5 to -0.2%)               | 1.19                     |
|                                           | Saudi Arabia                 |                               | 12076.9 (10926.9–<br>13362)            | 166.6% (153.2 to 180%)              | 30759.7 (27871.4–<br>33712.7) | -1.5% (-4 to 1.2%)                  | 1.16                     |
|                                           | Syrian Arab Republic         |                               | 4919 (4454.6–5399.6)                   | 37.1% (32 to 42.2%)                 | 32983.9 (29977.1–<br>36072.6) | 1% (0.4 to 1.5%)                    | 1.19                     |
|                                           | Tunisia                      |                               | 3985.5 (3630.6–<br>4359.6)             | 54.5% (48.3 to 60.4%)               | 32857.4 (29808.3–<br>35970.3) | 0.4% (-0.1 to 0.9%)                 | 1.19                     |
| Türkiye                                   |                              | 27316.9 (24809–<br>29912.1)   | 56.1% (49.3 to 62.8%)                  | 31032.8 (28267.3–<br>33987.3)       | 0.7% (-1.8 to 3.4%)           | 1.25                                |                          |
| United Arab Emirates                      |                              | 3386.5 (3025.4–3794)          | 477.2% (443.3 to 509%)                 | 31755.5 (28744.2–<br>34841.8)       | 0% (-0.6 to 0.6%)             | 1.19                                |                          |
| Yemen                                     |                              | 9474.7 (8476.3–<br>10502.6)   | 163.9% (159.2 to 168.7%)               | 32765.4 (29726.4–<br>35887.4)       | 0.2% (-0.3 to 0.7%)           | 1.19                                |                          |
| Afghanistan                               |                              | 10870.8 (9667.2–<br>12101.4)  | 236.4% (229.2 to 243%)                 | 32717.2 (29722.6–<br>35827.7)       | -0.4% (-0.9 to 0.2%)          | 1.19                                |                          |
| Sudan                                     |                              | 12508.7 (11209.3–<br>13860.2) | 119.5% (117.3 to 122%)                 | 32741.2 (29701.9–<br>35840.2)       | 0.1% (-0.5 to 0.6%)           | 1.19                                |                          |
| <b>YLDs (Years Lived with Disability)</b> |                              |                               |                                        |                                     |                               |                                     |                          |
| Meningitis                                | Global                       |                               | 683.3 (480.9–924.3)                    | -19.2% (-22.5 to -15.4%)            | 9 (6.3–12.2)                  | -41.2% (-43.6 to -38.4%)            | 1.02                     |
|                                           | North Africa and Middle East |                               | 36.2 (25.1–48.7)                       | 17.1% (9.2 to 26.8%)                | 6 (4.2–8)                     | -34.6% (-39 to -29.4%)              | 1.16                     |
|                                           | Algeria                      |                               | 2.2 (1.5–3)                            | 32.6% (17.8 to 48%)                 | 5.4 (3.7–7.3)                 | -20.4% (-29.4 to -11.2%)            | 1.03                     |
|                                           | Bahrain                      |                               | 0.1 (0–0.1)                            | 69.2% (45.3 to 101.3%)              | 3.9 (2.7–5.4)                 | -44.7% (-51.7 to -35.7%)            | 0.85                     |
|                                           | Egypt                        |                               | 6.3 (4.3–8.6)                          | 24.3% (7.7 to 42.2%)                | 6.3 (4.3–8.6)                 | -29.9% (-39 to -20.2%)              | 1.02                     |
|                                           | Iran                         |                               | 5.9 (4.1–7.9)                          | 4.6% (-5.1 to 15.9%)                | 7 (4.9–9.3)                   | -28.1% (-34 to -21.5%)              | 2.07                     |

**Table S11** Cause- and sex-specific burden, mortality, incidence, and prevalence of neurological conditions in North Africa and Middle East countries

| Measure              |                              | All Ages                 |                          | Age-standardised     |                          | Sex ratio<br>2019 |
|----------------------|------------------------------|--------------------------|--------------------------|----------------------|--------------------------|-------------------|
|                      |                              | Number (thousand)        | Percent change           | Rate per 100,000     | Percent change           |                   |
|                      |                              | 2019                     | From 1990 to 2019        | 2019                 | From 1990 to 2019        |                   |
| Cause                | Location                     | Mean (95% UI)            | Mean (95% UI)            | Mean (95% UI)        | Mean (95% UI)            | F:M               |
|                      | Iraq                         | 2.5 (1.7–3.3)            | 67.1% (49.1 to 87.9%)    | 5.8 (4–7.8)          | -30.1% (-37.7 to -21.7%) | 1.04              |
|                      | Jordan                       | 1 (0.7–1.4)              | 178.2% (129.5 to 241.1%) | 8.6 (5.8–12)         | -11.4% (-25.3 to 7.1%)   | 1.03              |
|                      | Kuwait                       | 0.2 (0.1–0.2)            | 109.8% (85.4 to 135.6%)  | 3.6 (2.5–4.9)        | -19.5% (-29 to -9.2%)    | 1.14              |
|                      | Lebanon                      | 0.3 (0.2–0.4)            | 9.3% (-5.5 to 26.6%)     | 5.7 (3.9–7.8)        | -31.5% (-40.5 to -21.3%) | 1.07              |
|                      | Libya                        | 0.3 (0.2–0.5)            | 57.8% (41 to 77.2%)      | 5 (3.5–6.8)          | -5.1% (-14.7 to 5.9%)    | 1.09              |
|                      | Morocco                      | 2.4 (1.7–3.3)            | -18.3% (-30.3 to -2.8%)  | 6.8 (4.7–9.3)        | -42.1% (-49.9 to -32%)   | 0.94              |
|                      | Palestine                    | 0.4 (0.3–0.5)            | 39.3% (21.3 to 59.7%)    | 7.6 (5.2–10.4)       | -42% (-49 to -33.9%)     | 1.04              |
|                      | Oman                         | 0.1 (0–0.1)              | 59.2% (39.1 to 81.2%)    | 1.6 (1.1–2.2)        | -32.6% (-40.7 to -23.8%) | 0.81              |
|                      | Qatar                        | 0.2 (0.2–0.3)            | 433.6% (314.1 to 580.1%) | 8 (5.4–10.9)         | -22.2% (-36.6 to -5.3%)  | 0.96              |
|                      | Saudi Arabia                 | 1 (0.7–1.4)              | 80.9% (59.7 to 105.7%)   | 2.9 (2–4)            | -25.2% (-34.1 to -15.2%) | 1.07              |
|                      | Syrian Arab Republic         | 1.2 (0.8–1.6)            | -30.8% (-40.3 to -19.4%) | 8.2 (5.6–11.2)       | -38.4% (-46.4 to -29.7%) | 1.00              |
|                      | Tunisia                      | 0.8 (0.5–1)              | 6.7% (-6.7 to 24.3%)     | 6.5 (4.5–9.1)        | -25% (-33.6 to -12.7%)   | 1.18              |
|                      | Türkiye                      | 1.2 (0.8–1.7)            | -49.8% (-56.7 to -42%)   | 1.5 (1–2.1)          | -64.1% (-69 to -58.5%)   | 0.78              |
|                      | United Arab Emirates         | 0.3 (0.2–0.4)            | 333.9% (292.3 to 376.9%) | 3.6 (2.5–4.9)        | -16.1% (-24.9 to -6.1%)  | 1.12              |
|                      | Yemen                        | 2.3 (1.6–3.2)            | 86.1% (63.1 to 112.3%)   | 7.4 (5.2–10.2)       | -20% (-29.5 to -9.3%)    | 1.00              |
|                      | Afghanistan                  | 5.8 (4.1–7.8)            | 108.3% (79.6 to 142.8%)  | 19.1 (13.9–25.3)     | -33.2% (-42 to -22.8%)   | 1.13              |
|                      | Sudan                        | 1.6 (1.1–2.3)            | -47.7% (-55 to -38.7%)   | 4.1 (2.8–5.5)        | -74.4% (-77.6 to -70.4%) | 0.96              |
| Encephalitis         | Global                       | 482.4 (343.3–647.3)      | 5.2% (0.7 to 9.8%)       | 6.1 (4.4–8.3)        | -28.8% (-31.6 to -25.6%) | 1.03              |
|                      | North Africa and Middle East | 19.8 (13.8–26.8)         | 84.9% (76.6 to 93.9%)    | 3.2 (2.2–4.3)        | -4.1% (-8.1 to 0.4%)     | 1.35              |
|                      | Algeria                      | 1.2 (0.8–1.6)            | 94.5% (76.8 to 113.5%)   | 2.7 (1.9–3.7)        | 8.6% (-1.1 to 18.5%)     | 1.24              |
|                      | Bahrain                      | <0.1 (<0.1–<0.1)         | 187.6% (156.4 to 223.9%) | 1.9 (1.3–2.6)        | -7.3% (-17 to 4.6%)      | 1.24              |
|                      | Egypt                        | 3.2 (2.2–4.4)            | 62.8% (49 to 78.3%)      | 3.2 (2.2–4.4)        | -13.2% (-20.2 to -5.3%)  | 1.24              |
|                      | Iran                         | 2.4 (1.7–3.3)            | 47.4% (37.4 to 57.9%)    | 2.8 (1.9–3.8)        | -8.6% (-14.1 to -3.1%)   | 1.33              |
|                      | Iraq                         | 1.3 (0.9–1.8)            | 149.5% (130.6 to 169.4%) | 3.2 (2.2–4.3)        | -4.5% (-11.4 to 2.7%)    | 1.37              |
|                      | Jordan                       | 0.4 (0.2–0.5)            | 197.7% (169.8 to 217.4%) | 3.1 (2.1–4.2)        | -9.9% (-17.7 to -4%)     | 1.26              |
|                      | Kuwait                       | 0.1 (0.1–0.1)            | 178.7% (147.6 to 207.1%) | 1.7 (1.2–2.4)        | 1.8% (-9 to 12.2%)       | 1.33              |
|                      | Lebanon                      | 0.2 (0.1–0.3)            | 40.1% (25.7 to 54.9%)    | 3.7 (2.6–5.1)        | -17.9% (-26.4 to -8.5%)  | 1.58              |
|                      | Libya                        | 0.2 (0.1–0.2)            | 153.6% (135.9 to 178.4%) | 2.2 (1.5–2.9)        | 39.6% (30.6 to 51.4%)    | 1.24              |
|                      | Morocco                      | 1.2 (0.8–1.6)            | 47.7% (36.5 to 60.2%)    | 3.1 (2.2–4.3)        | -3.2% (-10.4 to 4.8%)    | 1.32              |
|                      | Palestine                    | 0.2 (0.1–0.3)            | 153.5% (127 to 181.8%)   | 4.2 (2.9–5.8)        | -3.1% (-12.4 to 6.9%)    | 1.22              |
|                      | Oman                         | 0.1 (0.1–0.2)            | 112.6% (90.4 to 136.2%)  | 3 (2.1–4.1)          | -17.2% (-25.6 to -8.2%)  | 1.05              |
|                      | Qatar                        | <0.1 (<0.1–<0.1)         | 540.5% (486.5 to 583.1%) | 1.4 (0.9–1.9)        | -6% (-13.9 to 1.1%)      | 1.26              |
|                      | Saudi Arabia                 | 0.7 (0.5–0.9)            | 140.7% (117.8 to 165%)   | 1.8 (1.3–2.5)        | -7.6% (-16.3 to 1.9%)    | 1.32              |
|                      | Syrian Arab Republic         | 0.6 (0.4–0.8)            | 16.4% (8 to 25.4%)       | 3.7 (2.6–5.1)        | -7.5% (-13.3 to -0.9%)   | 1.26              |
|                      | Tunisia                      | 0.4 (0.3–0.5)            | 36.2% (23.4 to 51%)      | 3.1 (2.1–4.2)        | -10.5% (-18.6 to -1.5%)  | 1.33              |
|                      | Türkiye                      | 2.7 (1.8–3.7)            | 35.4% (19 to 50.4%)      | 3.1 (2.1–4.3)        | -10.6% (-21.2 to -0.5%)  | 1.34              |
| United Arab Emirates | 0.2 (0.1–0.2)                | 591.3% (545.5 to 639.8%) | 1.6 (1.1–2.2)            | 28.8% (19.3 to 38%)  | 1.28                     |                   |
| Yemen                | 1.1 (0.7–1.5)                | 187.7% (163.7 to 215.1%) | 3.5 (2.5–4.8)            | 16.7% (8.3 to 26.2%) | 1.32                     |                   |
| Afghanistan          | 2.5 (1.7–3.3)                | 288.8% (253.9 to 328.3%) | 7.5 (5.4–10.1)           | 12.6% (2.4 to 23.8%) | 1.58                     |                   |
| Sudan                | 1.3 (0.9–1.8)                | 114.1% (95.8 to 132.8%)  | 3.3 (2.3–4.5)            | 0.2% (-7.7 to 8.4%)  | 1.27                     |                   |
| Tetanus              | Global                       | 1.7 (1–2.7)              | -76.5% (-81.8 to -71%)   | <0.1 (<0.1–<0.1)     | -81.7% (-85.3 to -77.9%) | 0.94              |
|                      | North Africa and Middle East | <0.1 (<0.1–<0.1)         | -70.2% (-81.9 to -50.5%) | <0.1 (<0.1–<0.1)     | -80.9% (-87.4 to -70.7%) | 0.71              |
|                      | Algeria                      | <0.1 (<0.1–<0.1)         | -46.5% (-76.6 to -2.4%)  | <0.1 (<0.1–<0.1)     | -65.9% (-84.6 to -41.1%) | 0.7               |
|                      | Bahrain                      | <0.1 (<0.1–<0.1)         | 136.8% (87 to 169.8%)    | <0.1 (<0.1–<0.1)     | -11.7% (-35.5 to 0%)     | 0.77              |
|                      | Egypt                        | <0.1 (<0.1–<0.1)         | -65.9% (-81.4 to -38.2%) | <0.1 (<0.1–<0.1)     | -79.4% (-88 to -61.9%)   | 0.47              |
|                      | Iran                         | <0.1 (<0.1–<0.1)         | -79% (-90 to -59.4%)     | <0.1 (<0.1–<0.1)     | -82.7% (-90.7 to -70.6%) | 0.62              |
|                      | Iraq                         | <0.1 (<0.1–<0.1)         | -64.2% (-85.1 to -12.2%) | <0.1 (<0.1–<0.1)     | -78.7% (-89.9 to -58.3%) | 0.45              |
|                      | Jordan                       | <0.1 (<0.1–<0.1)         | 11.7% (-38.3 to 76.3%)   | <0.1 (<0.1–<0.1)     | -54.7% (-72.7 to -35.8%) | 0.63              |
|                      | Kuwait                       | <0.1 (<0.1–<0.1)         | 123% (90.9 to 149.1%)    | <0.1 (<0.1–<0.1)     | -9.2% (-21.4 to 1.3%)    | 0.91              |



**Table S11** Cause- and sex-specific burden, mortality, incidence, and prevalence of neurological conditions in North Africa and Middle East countries

| Measure                                 | Cause                        | Location             | All Ages                  |                                     | Age-standardised         |                                     | Sex ratio<br>2019<br>F:M |
|-----------------------------------------|------------------------------|----------------------|---------------------------|-------------------------------------|--------------------------|-------------------------------------|--------------------------|
|                                         |                              |                      | Number (thousand)<br>2019 | Percent change<br>From 1990 to 2019 | Rate per 100,000<br>2019 | Percent change<br>From 1990 to 2019 |                          |
|                                         |                              |                      | Mean (95% UI)             | Mean (95% UI)                       | Mean (95% UI)            | Mean (95% UI)                       |                          |
|                                         |                              | Lebanon              | <0.1 (<0.1–<0.1)          | -48.7% (-87.9 to 58.3%)             | <0.1 (<0.1–<0.1)         | -77.4% (-94.2 to -30.2%)            | 0.76                     |
|                                         |                              | Libya                | <0.1 (<0.1–<0.1)          | -24.6% (-59.7 to 14.3%)             | <0.1 (<0.1–<0.1)         | -46.2% (-73.2 to -18.6%)            | 0.74                     |
|                                         |                              | Morocco              | <0.1 (<0.1–<0.1)          | -81.5% (-91.7 to -62.2%)            | <0.1 (<0.1–<0.1)         | -82% (-91.4 to -65.1%)              | 0.74                     |
|                                         |                              | Palestine            | <0.1 (<0.1–<0.1)          | -58.1% (-87.2 to 12.5%)             | <0.1 (<0.1–<0.1)         | -72.5% (-90.1 to -44.6%)            | 0.64                     |
|                                         |                              | Oman                 | <0.1 (<0.1–<0.1)          | -25.8% (-69.3 to 53.4%)             | <0.1 (<0.1–<0.1)         | -78.1% (-93.8 to -34.9%)            | 0.69                     |
|                                         |                              | Qatar                | <0.1 (<0.1–<0.1)          | 322.8% (141.9 to 430%)              | <0.1 (<0.1–<0.1)         | -27.4% (-63.8 to -3.7%)             | 1.62                     |
|                                         |                              | Saudi Arabia         | <0.1 (<0.1–<0.1)          | -76% (-93.8 to -17.7%)              | <0.1 (<0.1–<0.1)         | -87.9% (-96.6 to -59.1%)            | 0.76                     |
|                                         |                              | Syrian Arab Republic | <0.1 (<0.1–<0.1)          | -87.9% (-94.9 to -69.9%)            | <0.1 (<0.1–<0.1)         | -83.4% (-92.1 to -67.4%)            | 0.7                      |
|                                         |                              | Tunisia              | <0.1 (<0.1–<0.1)          | -45.6% (-75.1 to -9.6%)             | <0.1 (<0.1–<0.1)         | -56.9% (-80.3 to -30.5%)            | 0.75                     |
|                                         |                              | Türkiye              | <0.1 (<0.1–<0.1)          | -87.3% (-94 to -72.3%)              | <0.1 (<0.1–<0.1)         | -92.6% (-96.6 to -81.5%)            | 0.82                     |
|                                         |                              | United Arab Emirates | <0.1 (<0.1–<0.1)          | 19.4% (-65.4 to 265.1%)             | <0.1 (<0.1–<0.1)         | -83% (-95 to -29.7%)                | 1.71                     |
|                                         |                              | Yemen                | <0.1 (<0.1–<0.1)          | -64.9% (-87.5 to 3.4%)              | <0.1 (<0.1–<0.1)         | -77.7% (-91.4 to -48.7%)            | 0.4                      |
|                                         |                              | Afghanistan          | <0.1 (<0.1–<0.1)          | -59.9% (-78.4 to -18.6%)            | <0.1 (<0.1–<0.1)         | -82.7% (-89.1 to -70.5%)            | 0.94                     |
|                                         |                              | Sudan                | <0.1 (<0.1–<0.1)          | -76.4% (-90.3 to -41.6%)            | <0.1 (<0.1–<0.1)         | -83.6% (-92.6 to -68.2%)            | 0.41                     |
| Brain and central nervous system cancer | Global                       |                      | 129.4 (83.9–175)          | 118.1% (34.2 to 156.9%)             | 1.6 (1.1–2.2)            | 29.5% (-18.9 to 52%)                | 0.86                     |
|                                         | North Africa and Middle East |                      | 10.6 (6.2–15)             | 203.1% (78.6 to 311.3%)             | 1.9 (1.1–2.7)            | 55.6% (-2.6 to 105.3%)              | 0.78                     |
|                                         |                              | Algeria              | 0.4 (0.2–0.6)             | 183.7% (52.9 to 298.7%)             | 0.9 (0.5–1.4)            | 59% (-14.1 to 120.7%)               | 0.89                     |
|                                         |                              | Bahrain              | <0.1 (<0.1–<0.1)          | 510.4% (260.3 to 799.8%)            | 1.5 (0.9–2.2)            | 50.6% (-10.4 to 121.5%)             | 0.72                     |
|                                         |                              | Egypt                | 1 (0.6–1.6)               | 164.1% (48 to 286.3%)               | 1.2 (0.7–1.8)            | 39.2% (-12.6 to 102%)               | 0.78                     |
|                                         |                              | Iran                 | 2.4 (1.1–3.5)             | 174% (49.3 to 259.1%)               | 2.9 (1.3–4.3)            | 62.6% (-5.7 to 104.8%)              | 0.81                     |
|                                         |                              | Iraq                 | 1 (0.6–1.5)               | 318.3% (111.4 to 590.4%)            | 2.9 (1.8–4.2)            | 64.4% (-13.6 to 160.6%)             | 0.95                     |
|                                         |                              | Jordan               | 0.2 (0.1–0.3)             | 509% (285.8 to 731.1%)              | 1.7 (1.1–2.5)            | 62.9% (0.1 to 124.2%)               | 0.81                     |
|                                         |                              | Kuwait               | 0.1 (0–0.1)               | 380.1% (193.4 to 556.2%)            | 1.9 (1.2–2.9)            | 81.7% (11.4 to 148.3%)              | 0.55                     |
|                                         |                              | Lebanon              | 0.2 (0.1–0.2)             | 318.6% (176.1 to 489%)              | 3.1 (1.9–4.6)            | 128.8% (50.9 to 223.1%)             | 0.69                     |
|                                         |                              | Libya                | 0.1 (0.1–0.2)             | 154.9% (69.8 to 287.6%)             | 1.9 (1.2–2.7)            | 33.2% (-5.8 to 94.8%)               | 0.58                     |
|                                         |                              | Morocco              | 0.2 (0.1–0.3)             | 123.8% (33.3 to 228.5%)             | 0.6 (0.4–0.9)            | 36.2% (-14 to 92.3%)                | 1.26                     |
|                                         |                              | Palestine            | 0.1 (0.1–0.2)             | 216.7% (92.4 to 357.9%)             | 3.2 (2.4–3)              | 25.1% (-19.5 to 76.2%)              | 0.74                     |
|                                         |                              | Oman                 | 0.1 (0–0.1)               | 514.4% (193.5 to 920.7%)            | 1.6 (0.9–2.4)            | 130.8% (13.7 to 260.4%)             | 0.82                     |
|                                         |                              | Qatar                | <0.1 (<0.1–0.1)           | 1494.2% (769.7 to 2457.2%)          | 2.4 (1.5–3.8)            | 97.1% (16.7 to 204.4%)              | 1.00                     |
|                                         |                              | Saudi Arabia         | 0.6 (0.4–1)               | 932.3% (436 to 1905.1%)             | 1.8 (1.2–2.9)            | 237.6% (77.8 to 536.9%)             | 0.96                     |
|                                         |                              | Syrian Arab Republic | 0.3 (0.2–0.4)             | 122.3% (34.4 to 241%)               | 2.1 (1.4–3.2)            | 42.3% (-4.4 to 112.2%)              | 0.76                     |
|                                         |                              | Tunisia              | 0.1 (0.1–0.2)             | 187.5% (71.7 to 334.5%)             | 0.8 (0.5–1.3)            | 83.1% (10.5 to 174.5%)              | 1.05                     |
|                                         |                              | Türkiye              | 2.5 (1.1–3.9)             | 178.5% (50.6 to 349.9%)             | 3 (1.3–4.7)              | 67.7% (-3.5 to 160.9%)              | 0.69                     |
|                                         |                              | United Arab Emirates | 0.2 (0.1–0.3)             | 736.5% (427.5 to 1139.8%)           | 2.1 (1.1–3.2)            | 25.8% (-25.8 to 91.7%)              | 0.75                     |
|                                         |                              | Yemen                | 0.3 (0.1–0.4)             | 191.3% (55 to 447.4%)               | 1.2 (0.7–1.9)            | 32.2% (-24.3 to 118.2%)             | 0.71                     |
|                                         |                              | Afghanistan          | 0.4 (0.2–0.7)             | 158.9% (67.4 to 354.3%)             | 1.5 (0.8–2.9)            | 2.9% (-32.8 to 63.2%)               | 0.77                     |
|                                         |                              | Sudan                | 0.5 (0.2–0.7)             | 131.1% (10.5 to 404%)               | 1.4 (0.8–2.1)            | 25.8% (-31.3 to 129.2%)             | 0.67                     |
| Stroke*                                 | Global                       |                      | 17741.7 (12759.4–22587.4) | 88.9% (85.3 to 92.7%)               | 218.1 (156.7–277)        | -4.7% (-6.1 to -3.3%)               | 1.3                      |
|                                         | North Africa and Middle East |                      | 1113.7 (812.1–1400.8)     | 140.2% (135.3 to 145.3%)            | 239.4 (176.1–301.4)      | -0.7% (-2.6 to 1.2%)                | 1.43                     |
|                                         |                              | Algeria              | 85 (62.2–107.5)           | 128.1% (116.1 to 140.6%)            | 242.8 (178.6–307.3)      | -10.6% (-14.9 to -6%)               | 1.44                     |
|                                         |                              | Bahrain              | 2.1 (1.5–2.6)             | 275.8% (251.4 to 302.4%)            | 173.8 (126–219.2)        | -25.9% (-30 to -21.8%)              | 1.56                     |
|                                         |                              | Egypt                | 193.9 (141.7–245.2)       | 149.5% (136.2 to 163%)              | 282.6 (206.4–356.5)      | 18% (11.8 to 24.2%)                 | 1.57                     |
|                                         |                              | Iran                 | 148 (106.3–188.6)         | 125.2% (116.8 to 134%)              | 196.4 (140.3–251.9)      | -12.7% (-15.5 to -10%)              | 1.34                     |
|                                         |                              | Iraq                 | 78.4 (56.7–98.6)          | 167% (154.2 to 181.1%)              | 306.4 (223.5–385.2)      | -8.7% (-13.3 to -3.7%)              | 1.39                     |
|                                         |                              | Jordan               | 20.5 (14.9–25.8)          | 256.2% (235.6 to 277.3%)            | 284.5 (207.6–358.1)      | -23.7% (-28.5 to -19.2%)            | 1.47                     |
|                                         |                              | Kuwait               | 6.3 (4.5–8)               | 262.6% (237.2 to 288.5%)            | 189.4 (138.2–238)        | -6.8% (-12.1 to -1.3%)              | 1.2                      |
|                                         |                              | Lebanon              | 11.8 (8.7–14.8)           | 127.4% (116 to 140.3%)              | 224.6 (165.6–281.1)      | 1.8% (-2.8 to 7.2%)                 | 1.62                     |
|                                         |                              | Libya                | 13.7 (10–17.2)            | 193% (177.2 to 209.7%)              | 248.1 (179.9–311)        | 12.8% (6.9 to 18.8%)                | 1.85                     |

**Table S11** Cause- and sex-specific burden, mortality, incidence, and prevalence of neurological conditions in North Africa and Middle East countries

| Measure                   | Cause | Location                     | All Ages                  |                                     | Age-standardised         |                                     | Sex ratio<br>2019<br>F:M |
|---------------------------|-------|------------------------------|---------------------------|-------------------------------------|--------------------------|-------------------------------------|--------------------------|
|                           |       |                              | Number (thousand)<br>2019 | Percent change<br>From 1990 to 2019 | Rate per 100,000<br>2019 | Percent change<br>From 1990 to 2019 |                          |
|                           |       |                              | Mean (95% UI)             | Mean (95% UI)                       | Mean (95% UI)            | Mean (95% UI)                       |                          |
|                           |       | Morocco                      | 85.2 (62.1–106.7)         | 119.2% (108.3 to 131.5%)            | 265.1 (194.2–333)        | 3.4% (-1.4 to 9.1%)                 | 1.53                     |
|                           |       | Palestine                    | 6.3 (4.6–8)               | 161% (146.3 to 176.7%)              | 238 (173.6–302.4)        | -3.9% (-9.4 to 1.6%)                | 1.54                     |
|                           |       | Oman                         | 5.5 (3.9–7.1)             | 162% (145.6 to 179%)                | 237.2 (174.1–301.6)      | -8.1% (-12.8 to -3%)                | 1.27                     |
|                           |       | Qatar                        | 3.1 (2.2–4)               | 555.1% (505.9 to 612.7%)            | 182.2 (132.5–228.2)      | -24.2% (-28.2 to -19.9%)            | 1.5                      |
|                           |       | Saudi Arabia                 | 68.9 (49–87.5)            | 226.9% (200.7 to 255.2%)            | 299.4 (218.9–378.4)      | 7.2% (-1.5 to 15.6%)                | 1.55                     |
|                           |       | Syrian Arab Republic         | 30 (22–38)                | 77.7% (68.4 to 86.5%)               | 234.1 (172.3–295.5)      | -13.7% (-17.7 to -9.6%)             | 1.33                     |
|                           |       | Tunisia                      | 24.9 (18.4–31.3)          | 180.2% (164.4 to 196.5%)            | 199.4 (146.5–250.1)      | 21.2% (14.7 to 27.8%)               | 1.39                     |
|                           |       | Türkiye                      | 168 (122.3–211.3)         | 104.2% (93.2 to 116%)               | 191.2 (139.3–239.6)      | -8.6% (-13.2 to -3.6%)              | 1.39                     |
|                           |       | United Arab Emirates         | 18.8 (13.5–24.2)          | 686.9% (628.8 to 746.8%)            | 336.4 (245.1–425.6)      | -10.2% (-14.8 to -5.7%)             | 1.41                     |
|                           |       | Yemen                        | 39.8 (29–50.1)            | 175.4% (160.3 to 191.5%)            | 249.6 (183.1–315.4)      | 1.2% (-4.2 to 7%)                   | 1.43                     |
|                           |       | Afghanistan                  | 41.5 (30.3–52)            | 127.5% (113.7 to 141.6%)            | 248.5 (183.7–312)        | 3.4% (-2.1 to 8.1%)                 | 1.5                      |
|                           |       | Sudan                        | 60.6 (43.9–76.3)          | 122.8% (111.4 to 134.4%)            | 276.5 (201.3–351.5)      | 8.2% (2.6 to 13.3%)                 | 1.54                     |
| Ischaemic stroke          |       | Global                       | 13128.5 (9349.9–16930.4)  | 102% (97.4 to 106.9%)               | 162.3 (115.8–209.9)      | 0.1% (-1.8 to 2%)                   | 1.36                     |
|                           |       | North Africa and Middle East | 877.3 (639.8–1114.1)      | 157.6% (151.5 to 164.4%)            | 195.6 (144.4–249.1)      | 5.2% (2.8 to 7.6%)                  | 1.45                     |
|                           |       | Algeria                      | 69.8 (50.8–89.3)          | 151.1% (135.5 to 167.4%)            | 204.2 (149.2–261.1)      | -3.1% (-8.5 to 2.6%)                | 1.45                     |
|                           |       | Bahrain                      | 1.5 (1.1–2)               | 287.4% (256.8 to 320.9%)            | 139.9 (101.5–178.9)      | -25.5% (-30.1 to -20.7%)            | 1.56                     |
|                           |       | Egypt                        | 159 (115.8–203.1)         | 179.1% (161.3 to 197.2%)            | 239.8 (175.1–307.5)      | 30% (22.2 to 37.9%)                 | 1.58                     |
|                           |       | Iran                         | 124.9 (88.9–160.3)        | 130% (120.3 to 141.2%)              | 169.1 (121.1–219.4)      | -12.7% (-15.8 to -9.5%)             | 1.35                     |
|                           |       | Iraq                         | 60.3 (43.3–76.4)          | 169.8% (154.6 to 186.7%)            | 249.5 (181.9–315.5)      | -6.3% (-11.5 to -0.1%)              | 1.48                     |
|                           |       | Jordan                       | 16.7 (12–21.1)            | 258.7% (234.4 to 283.5%)            | 243 (176.8–308.3)        | -23.7% (-29.1 to -18.5%)            | 1.48                     |
|                           |       | Kuwait                       | 4.7 (3.4–5.9)             | 265.9% (237.1 to 297.9%)            | 153.2 (111.1–193.1)      | -7.5% (-13.9 to -1.4%)              | 1.19                     |
|                           |       | Lebanon                      | 10 (7.3–12.6)             | 146.5% (132.8 to 161.4%)            | 190.1 (140–240.3)        | 7.8% (1.9 to 14.1%)                 | 1.62                     |
|                           |       | Libya                        | 11.2 (8.1–14.2)           | 220% (199.6 to 240.5%)              | 209.8 (152.5–264.3)      | 21.6% (14.6 to 28.9%)               | 1.89                     |
|                           |       | Morocco                      | 70.2 (50.8–88.4)          | 143.8% (129.5 to 159.4%)            | 223 (161.5–281)          | 12.6% (6.4 to 19.5%)                | 1.56                     |
|                           |       | Palestine                    | 5.1 (3.7–6.5)             | 163.5% (146.1 to 183.8%)            | 203.2 (147.6–260.1)      | -0.9% (-7.4 to 5.9%)                | 1.56                     |
|                           |       | Oman                         | 4.2 (3–5.4)               | 173% (151.6 to 194.5%)              | 197.7 (145.4–253.1)      | -2.6% (-8.7 to 3.8%)                | 1.18                     |
|                           |       | Qatar                        | 2.1 (1.5–2.7)             | 577.8% (513.3 to 654.7%)            | 143.4 (105–182.3)        | -23.4% (-28.4 to -18.4%)            | 1.51                     |
|                           |       | Saudi Arabia                 | 44.8 (32–57.5)            | 240.3% (202.3 to 280.5%)            | 222 (162.1–281.5)        | 12.5% (0.7 to 24.5%)                | 1.59                     |
|                           |       | Syrian Arab Republic         | 22.8 (16.7–29)            | 94.5% (82.4 to 106.8%)              | 182.8 (133.9–233.7)      | -8.8% (-13.6 to -3.7%)              | 1.39                     |
|                           |       | Tunisia                      | 21.3 (15.5–26.9)          | 194.8% (176.7 to 214.1%)            | 171.2 (125.8–216.1)      | 25.1% (18 to 33%)                   | 1.37                     |
|                           |       | Türkiye                      | 126.6 (92.7–160.6)        | 117.6% (102.4 to 133.2%)            | 145.8 (106.5–184)        | -5.7% (-11.7 to 0.5%)               | 1.4                      |
|                           |       | United Arab Emirates         | 14.4 (10.4–18.7)          | 754.8% (678.1 to 839.9%)            | 289.4 (210–368)          | -5.9% (-11.6 to -0.7%)              | 1.42                     |
|                           |       | Yemen                        | 30.5 (22.1–38.8)          | 216.5% (196.9 to 238.2%)            | 202.9 (148.1–258.8)      | 15.1% (7.9 to 22.6%)                | 1.47                     |
|                           |       | Afghanistan                  | 29 (21–37)                | 142.9% (123.4 to 161.9%)            | 189.7 (139.8–240.7)      | 17.3% (9.8 to 23.9%)                | 1.48                     |
|                           |       | Sudan                        | 47.3 (33.9–60.2)          | 150.9% (135.3 to 167.7%)            | 226.9 (164.1–290.5)      | 22.6% (15.5 to 30.3%)               | 1.57                     |
| Intracerebral haemorrhage |       | Global                       | 3266.3 (2334–4173.7)      | 57.2% (54.9 to 59.5%)               | 39.4 (28.1–50.2)         | -17.7% (-19.2 to -16.1%)            | 0.99                     |
|                           |       | North Africa and Middle East | 182.2 (129.1–229.6)       | 88.9% (82.6 to 95.8%)               | 34.4 (24.4–43.5)         | -21.5% (-24.2 to -18.4%)            | 1.26                     |
|                           |       | Algeria                      | 11.2 (7.8–14.4)           | 50.3% (35.3 to 65.8%)               | 29.2 (20.5–37.5)         | -39.8% (-45.5 to -34%)              | 1.33                     |
|                           |       | Bahrain                      | 0.4 (0.3–0.5)             | 217.3% (175 to 264.1%)              | 26.2 (18.1–34)           | -32.1% (-39.1 to -24.6%)            | 1.51                     |
|                           |       | Egypt                        | 27 (19.1–34.6)            | 68.2% (50.9 to 86.9%)               | 33.8 (24.2–43.2)         | -22.2% (-29.7 to -14%)              | 1.39                     |
|                           |       | Iran                         | 16.5 (11.5–21.1)          | 93% (84 to 102.4%)                  | 19.9 (14.1–25.6)         | -15.1% (-19.1 to -10.9%)            | 1.17                     |
|                           |       | Iraq                         | 15.1 (10.6–19.3)          | 161.7% (136.8 to 188.3%)            | 48.4 (34.2–61.7)         | -16.2% (-23.4 to -8.3%)             | 0.97                     |
|                           |       | Jordan                       | 2.7 (1.9–3.6)             | 216.8% (181.1 to 254.4%)            | 30.7 (21.8–39.7)         | -29.4% (-36.7 to -21.5%)            | 1.25                     |
|                           |       | Kuwait                       | 1.1 (0.7–1.4)             | 239.5% (187 to 294.7%)              | 25.9 (18.2–33.8)         | -6.3% (-17.3 to 4.8%)               | 1.09                     |
|                           |       | Lebanon                      | 1.3 (0.9–1.7)             | 52.5% (36 to 70.8%)                 | 24.7 (17.4–31.6)         | -25.7% (-33.5 to -17%)              | 1.53                     |
|                           |       | Libya                        | 1.9 (1.3–2.4)             | 103.6% (80.7 to 127.9%)             | 29 (20.5–37.8)           | -21.7% (-29.4 to -13.3%)            | 1.58                     |
|                           |       | Morocco                      | 11.5 (8.1–14.7)           | 46.4% (32.2 to 61.3%)               | 32.6 (23–41.7)           | -29.1% (-35.7 to -22.3%)            | 1.32                     |
|                           |       | Palestine                    | 0.9 (0.6–1.1)             | 134% (107.2 to 161.3%)              | 25.4 (17.9–32.8)         | -22% (-30.1 to -12.9%)              | 1.32                     |

**Table S11** Cause- and sex-specific burden, mortality, incidence, and prevalence of neurological conditions in North Africa and Middle East countries

| Measure                  | Cause | Location                     | All Ages                  |                                     | Age-standardised         |                                     | Sex ratio<br>2019<br>F:M |
|--------------------------|-------|------------------------------|---------------------------|-------------------------------------|--------------------------|-------------------------------------|--------------------------|
|                          |       |                              | Number (thousand)<br>2019 | Percent change<br>From 1990 to 2019 | Rate per 100,000<br>2019 | Percent change<br>From 1990 to 2019 |                          |
|                          |       |                              | Mean (95% UI)             | Mean (95% UI)                       | Mean (95% UI)            | Mean (95% UI)                       |                          |
|                          |       | Oman                         | 1 (0.7–1.3)               | 120.8% (94.1 to 152.2%)             | 31.1 (22.2–40)           | -30.2% (-36.7 to -22.6%)            | 1.84                     |
|                          |       | Qatar                        | 0.7 (0.5–0.9)             | 486.1% (398.9 to 596.6%)            | 28.6 (20.2–36.5)         | -30% (-37.3 to -22.4%)              | 1.39                     |
|                          |       | Saudi Arabia                 | 20.8 (14.3–27.6)          | 198.4% (164.8 to 235.6%)            | 68.9 (48.4–89.2)         | -5.7% (-13.5 to 3.3%)               | 1.39                     |
|                          |       | Syrian Arab Republic         | 5.9 (4.1–7.5)             | 35.3% (22.2 to 49.3%)               | 42.1 (29.6–53.2)         | -29.9% (-36.5 to -23.2%)            | 1.06                     |
|                          |       | Tunisia                      | 2.4 (1.7–3.2)             | 117.3% (89.7 to 151%)               | 18.6 (12.9–24.6)         | 1% (-11.9 to 16.4%)                 | 1.33                     |
|                          |       | Türkiye                      | 30.8 (21.6–39.3)          | 74.8% (56.5 to 93.9%)               | 34.2 (24.1–43.7)         | -15.9% (-24.3 to -6.6%)             | 1.27                     |
|                          |       | United Arab Emirates         | 3.2 (2.3–4.2)             | 492.2% (407.8 to 599.6%)            | 38.7 (27.7–49.6)         | -32% (-37.9 to -25.2%)              | 1.26                     |
|                          |       | Yemen                        | 7.1 (5.1–9.1)             | 82% (63.7 to 101.4%)                | 36.7 (26.3–46.8)         | -37.2% (-42.9 to -30.4%)            | 1.21                     |
|                          |       | Afghanistan                  | 10.2 (7.3–13)             | 87.6% (68.5 to 109.1%)              | 49.1 (35.3–62.2)         | -27.6% (-33.8 to -21.2%)            | 1.54                     |
|                          |       | Sudan                        | 10.5 (7.4–13.5)           | 53.2% (37.9 to 69%)                 | 39.7 (28.1–50.3)         | -32.1% (-38.3 to -25.6%)            | 1.35                     |
| Subarachnoid haemorrhage |       | Global                       | 1346.9 (964.2–1782.2)     | 65.4% (60.7 to 69.6%)               | 16.4 (11.7–21.6)         | -12.9% (-15.2 to -11.2%)            | 1.63                     |
|                          |       | North Africa and Middle East | 54.2 (37.9–72.3)          | 103.1% (83.8 to 116.5%)             | 9.3 (6.6–12.4)           | -17.9% (-26.2 to -12.2%)            | 1.77                     |
|                          |       | Algeria                      | 4 (2.7–5.4)               | 98.4% (53.6 to 135.2%)              | 9.5 (6.5–13)             | -23.7% (-41.8 to -9.3%)             | 1.67                     |
|                          |       | Bahrain                      | 0.1 (0.1–0.2)             | 353.6% (288.7 to 432.3%)            | 7.7 (5.2–10.4)           | -7.2% (-19.9 to 7.6%)               | 1.74                     |
|                          |       | Egypt                        | 7.9 (5.4–10.6)            | 68.8% (40 to 96.8%)                 | 9 (6.1–12.1)             | -21.3% (-34.6 to -8.4%)             | 1.84                     |
|                          |       | Iran                         | 6.7 (4.7–9)               | 129.1% (116.4 to 142.7%)            | 7.3 (5.2–9.9)            | -6.6% (-10.8 to -2.3%)              | 1.75                     |
|                          |       | Iraq                         | 3 (2.1–4.2)               | 141.8% (92.3 to 183.1%)             | 8.6 (5.9–11.8)           | -25.3% (-44.6 to -11.8%)            | 1.81                     |
|                          |       | Jordan                       | 1.1 (0.8–1.5)             | 345% (283.5 to 415.2%)              | 10.8 (7.5–14.5)          | -1.4% (-14.7 to 14.6%)              | 1.7                      |
|                          |       | Kuwait                       | 0.5 (0.4–0.7)             | 283.9% (223.4 to 357.4%)            | 10.3 (7.2–13.9)          | 3% (-11.2 to 20.2%)                 | 1.85                     |
|                          |       | Lebanon                      | 0.5 (0.4–0.7)             | 81.8% (54.2 to 113.8%)              | 9.9 (6.8–13.6)           | -9.9% (-23.7 to 6.3%)               | 1.81                     |
|                          |       | Libya                        | 0.7 (0.5–0.9)             | 145.8% (102.5 to 188.2%)            | 9.3 (6.4–12.8)           | -11% (-27.8 to 4%)                  | 1.78                     |
|                          |       | Morocco                      | 3.5 (2.4–4.8)             | 58.3% (30.8 to 84%)                 | 9.6 (6.6–12.8)           | -22.8% (-36.1 to -9.7%)             | 1.73                     |
|                          |       | Palestine                    | 0.4 (0.2–0.5)             | 202.8% (161.5 to 251.9%)            | 9.5 (6.5–12.9)           | -5.3% (-18.9 to 11%)                | 1.83                     |
|                          |       | Oman                         | 0.4 (0.3–0.5)             | 176.3% (133.9 to 220%)              | 8.3 (5.8–11.3)           | -19.2% (-32.4 to -5.8%)             | 1.87                     |
|                          |       | Qatar                        | 0.3 (0.2–0.4)             | 571.8% (450.8 to 693.6%)            | 10.2 (7–13.8)            | -17.9% (-36.9 to -2.8%)             | 1.75                     |
|                          |       | Saudi Arabia                 | 3.3 (2.3–4.6)             | 249.5% (196.9 to 308.4%)            | 8.5 (5.9–11.6)           | -2.9% (-16.7 to 12.6%)              | 1.85                     |
|                          |       | Syrian Arab Republic         | 1.4 (0.9–1.9)             | 62.7% (29.4 to 92.5%)               | 9.2 (6.4–12.4)           | -14.4% (-30.5 to 0.6%)              | 1.64                     |
|                          |       | Tunisia                      | 1.3 (0.9–1.7)             | 118.1% (71.9 to 163.3%)             | 9.6 (6.6–13)             | 2.9% (-19.3 to 24.5%)               | 1.82                     |
|                          |       | Türkiye                      | 10.6 (7.3–14.4)           | 63.5% (38.4 to 92.1%)               | 11.3 (7.8–15.2)          | -19.5% (-31.6 to -4.8%)             | 1.73                     |
|                          |       | United Arab Emirates         | 1.1 (0.8–1.6)             | 634.3% (522.4 to 767.7%)            | 8.2 (5.7–11.3)           | -15.8% (-27 to -3.1%)               | 1.9                      |
|                          |       | Yemen                        | 2.2 (1.5–2.9)             | 140.2% (106.5 to 178.1%)            | 10 (7–13.5)              | -16.6% (-28.6 to -3.4%)             | 1.78                     |
|                          |       | Afghanistan                  | 2.3 (1.6–3.1)             | 166.4% (129.5 to 213.7%)            | 9.6 (6.7–12.9)           | -10.6% (-23.4 to 4.2%)              | 1.75                     |
|                          |       | Sudan                        | 2.9 (2.3–3.9)             | 87.6% (60.3 to 116.6%)              | 9.9 (6.9–13.3)           | -18.9% (-31.2 to -5.4%)             | 1.75                     |
| Neurological disorders†* |       | Global                       | 65626 (28649.3–122710)    | 64.9% (58.3 to 81.4%)               | 831.3 (365.8–1542.4)     | 2.9% (-0.7 to 6.8%)                 | 1.43                     |
|                          |       | North Africa and Middle East | 5447.8 (2227.5–10439.2)   | 99.6% (83.8 to 121.6%)              | 935 (419.6–1737.7)       | 0.2% (-6.5 to 8.3%)                 | 1.42                     |
|                          |       | Algeria                      | 374.2 (157.4–723.9)       | 84.9% (44 to 148%)                  | 928.2 (416.8–1744.2)     | -2.3% (-20 to 19.5%)                | 1.42                     |
|                          |       | Bahrain                      | 13.3 (5.2–25.4)           | 204.4% (128.4 to 304.6%)            | 923.6 (424.3–1686.2)     | -4.4% (-29 to 24.2%)                | 1.39                     |
|                          |       | Egypt                        | 852 (300.4–1665.6)        | 94.8% (48.2 to 146.5%)              | 931.2 (371.4–1745.9)     | 2% (-16.8 to 23.4%)                 | 1.44                     |
|                          |       | Iran                         | 833.3 (360.8–1572.9)      | 76.6% (61.6 to 100%)                | 975.8 (451.6–1800)       | -0.6% (-6.7 to 6.2%)                | 1.39                     |
|                          |       | Iraq                         | 353.6 (132.5–707)         | 168.9% (104.9 to 239.6%)            | 913 (394.4–1730.9)       | -0.1% (-18.2 to 20.6%)              | 1.42                     |
|                          |       | Jordan                       | 97.6 (36.3–192.4)         | 245.4% (173.6 to 348.2%)            | 907.9 (394.5–1704.5)     | -0.8% (-17.2 to 18.5%)              | 1.42                     |
|                          |       | Kuwait                       | 41.2 (15.6–81)            | 185.4% (126.4 to 264.3%)            | 916.1 (399.6–1722.5)     | 1.2% (-18.1 to 24.3%)               | 1.42                     |
|                          |       | Lebanon                      | 48.7 (20.4–92.6)          | 81.3% (48.1 to 132.4%)              | 931.4 (391–1772.2)       | -0.2% (-17.7 to 20.5%)              | 1.42                     |
|                          |       | Libya                        | 62.7 (24.3–122.2)         | 92.6% (53.5 to 140.6%)              | 904.5 (393.2–1713.4)     | -2% (-18.5 to 16.5%)                | 1.42                     |
|                          |       | Morocco                      | 327.2 (124.9–641.4)       | 62.1% (28.2 to 109.9%)              | 925.7 (383.4–1774.1)     | 1.1% (-18.1 to 23.1%)               | 1.42                     |
|                          |       | Palestine                    | 39.9 (15–78.1)            | 166.7% (106 to 236.2%)              | 915.4 (406.2–1702.6)     | -0.9% (-17.1 to 18%)                | 1.42                     |
|                          |       | Oman                         | 38.1 (13.6–75.2)          | 175.9% (112.6 to 250.9%)            | 877.8 (389.3–1634.8)     | 0.7% (-17.7 to 24.3%)               | 1.41                     |
|                          |       | Qatar                        | 24.4 (9.3–47.7)           | 572% (407.4 to 748.7%)              | 861.3 (393.5–1543.5)     | -3.5% (-24.6 to 22.3%)              | 1.44                     |

**Table S11** Cause- and sex-specific burden, mortality, incidence, and prevalence of neurological conditions in North Africa and Middle East countries

| Measure                                 | Cause                | Location                     | All Ages                  |                                     | Age-standardised         |                                     | Sex ratio<br>2019<br>F:M |
|-----------------------------------------|----------------------|------------------------------|---------------------------|-------------------------------------|--------------------------|-------------------------------------|--------------------------|
|                                         |                      |                              | Number (thousand)<br>2019 | Percent change<br>From 1990 to 2019 | Rate per 100,000<br>2019 | Percent change<br>From 1990 to 2019 |                          |
|                                         |                      |                              | Mean (95% UI)             | Mean (95% UI)                       | Mean (95% UI)            | Mean (95% UI)                       |                          |
| Alzheimer's disease and other dementias |                      | Saudi Arabia                 | 338.3 (128.9–653.2)       | 172.5% (108.9 to 275.5%)            | 949.3 (419–1737.1)       | 3.3% (-18.3 to 35.6%)               | 1.33                     |
|                                         |                      | Syrian Arab Republic         | 128.5 (49–254)            | 38.9% (11.1 to 84.7%)               | 916.3 (384.9–1745.3)     | 1.8% (-14.4 to 23%)                 | 1.44                     |
|                                         |                      | Tunisia                      | 109.3 (46.3–207.6)        | 64.6% (41.2 to 114.7%)              | 916.1 (393.8–1740)       | 1.6% (-12.7 to 20.5%)               | 1.45                     |
|                                         |                      | Türkiye                      | 833.8 (374–1538.2)        | 61.1% (30.1 to 120.6%)              | 966.5 (437.5–1760)       | 1% (-18.7 to 29.4%)                 | 1.46                     |
|                                         |                      | United Arab Emirates         | 84.7 (33.2–163.2)         | 430.1% (298.9 to 626.6%)            | 917 (419.7–1693.9)       | -4.9% (-28.6 to 25.3%)              | 1.35                     |
|                                         |                      | Yemen                        | 238.4 (80.9–479.5)        | 158.2% (97.3 to 245%)               | 887.5 (363.5–1694.8)     | -1.1% (-17.1 to 19.2%)              | 1.42                     |
|                                         |                      | Afghanistan                  | 279.5 (101.6–561)         | 224.6% (127.3 to 339.8%)            | 896.8 (387.4–1711.2)     | -2.4% (-22.3 to 23.3%)              | 1.45                     |
|                                         |                      | Sudan                        | 323.5 (113.5–649.9)       | 118.3% (70.7 to 191.4%)             | 902.9 (375.3–1718.2)     | 0.3% (-16 to 24.4%)                 | 1.42                     |
|                                         |                      | Global                       | 7417.1 (5226.8–9927.7)    | 164.7% (158.7 to 171%)              | 98.9 (69.5–132.6)        | 5.5% (4 to 6.8%)                    | 1.27                     |
|                                         |                      | North Africa and Middle East | 352.2 (248.1–474.3)       | 187.7% (180 to 195.6%)              | 112.8 (79.1–151.9)       | 2.8% (0.9 to 4.6%)                  | 1.1                      |
|                                         |                      | Algeria                      | 27.4 (19.4–37)            | 244.1% (216.3 to 275.2%)            | 113.1 (79.6–152.1)       | 1% (-3.2 to 5.2%)                   | 1.09                     |
|                                         |                      | Bahrain                      | 0.5 (0.3–0.7)             | 440% (403.7 to 480.9%)              | 113.7 (80.5–151.6)       | 2.9% (-1 to 7.3%)                   | 1.09                     |
|                                         |                      | Egypt                        | 41.2 (29.3–55.5)          | 119.1% (108.5 to 130%)              | 110 (76.8–148.3)         | 4.8% (0.4 to 9.7%)                  | 1.1                      |
|                                         |                      | Iran                         | 67.3 (47.3–90.6)          | 325.9% (297.8 to 357.1%)            | 113.9 (80–154)           | 2.2% (0 to 4%)                      | 1.08                     |
|                                         |                      | Iraq                         | 16.6 (11.8–22.4)          | 167.2% (154.7 to 181.3%)            | 110.5 (78.3–149.5)       | 6.3% (2.1 to 10.9%)                 | 1.09                     |
|                                         |                      | Jordan                       | 4.5 (3.1–6.1)             | 431% (401.7 to 459.4%)              | 111.6 (78.2–151.8)       | 3.7% (-1 to 8.3%)                   | 1.09                     |
|                                         |                      | Kuwait                       | 2 (1.4–2.7)               | 406.6% (380.4 to 434.2%)            | 116.3 (81.6–156.8)       | 0.6% (-3.7 to 5.4%)                 | 1.11                     |
|                                         |                      | Lebanon                      | 5.7 (4.7–7)               | 227.4% (206.9 to 246.6%)            | 113.8 (79.9–152.6)       | 3.3% (-1.1 to 8.2%)                 | 1.1                      |
|                                         |                      | Libya                        | 4.4 (3.1–5.8)             | 167.3% (155.4 to 180.6%)            | 109 (76.7–145.9)         | -2.1% (-6.2 to 2.7%)                | 1.09                     |
|                                         |                      | Morocco                      | 24.7 (17.4–33.3)          | 145.7% (134 to 158.8%)              | 110.9 (77.8–149.4)       | -0.2% (-4.4 to 4.5%)                | 1.08                     |
|                                         |                      | Palestine                    | 1.7 (1.2–2.3)             | 131.4% (119.3 to 143.7%)            | 111.6 (78.9–150.6)       | 1.5% (-3.4 to 6.1%)                 | 1.08                     |
|                                         |                      | Oman                         | 0.9 (0.6–1.2)             | 140.1% (127.7 to 155.2%)            | 113.4 (79.6–152)         | 0.8% (-3.4 to 5.3%)                 | 1.1                      |
|                                         |                      | Qatar                        | 0.3 (0.2–0.5)             | 637.3% (552.5 to 735.9%)            | 110.5 (77.2–147.4)       | 2.8% (-1.9 to 8%)                   | 1.09                     |
|                                         | Saudi Arabia         | 9.1 (6.4–12.3)               | 128.3% (112.8 to 144.1%)  | 109.4 (76.6–146.3)                  | 1.2% (-3.3 to 5.8%)      | 1.11                                |                          |
|                                         | Syrian Arab Republic | 8.8 (6.2–11.9)               | 109.5% (95.8 to 123.9%)   | 110.8 (77.7–149.2)                  | 0.3% (-4 to 5.3%)        | 1.1                                 |                          |
|                                         | Tunisia              | 12.1 (8.5–16.3)              | 221.5% (202.1 to 243%)    | 114.9 (80.6–155.1)                  | 1.3% (-2.8 to 5.4%)      | 1.12                                |                          |
|                                         | Türkiye              | 92.7 (65.1–124.2)            | 199.6% (185.3 to 212.4%)  | 116.9 (82–157.2)                    | 3.9% (-0.7 to 8.2%)      | 1.11                                |                          |
|                                         | United Arab Emirates | 1 (0.7–1.5)                  | 610.5% (527.9 to 705.4%)  | 103.7 (72.7–139.5)                  | -0.4% (-4.8 to 3.8%)     | 1.09                                |                          |
|                                         | Yemen                | 9.1 (6.4–12.2)               | 195.2% (180.2 to 211.8%)  | 109.2 (76.5–146.7)                  | -2.6% (-7.1 to 2%)       | 1.08                                |                          |
|                                         | Afghanistan          | 7.5 (5.3–10.2)               | 54.5% (46.3 to 63.3%)     | 103.8 (73.3–140.2)                  | -2.3% (-6.5 to 2.7%)     | 1.07                                |                          |
|                                         | Sudan                | 14.3 (10.2–19.2)             | 115% (101.6 to 129.3%)    | 108.5 (76.5–145.8)                  | -0.1% (-4.3 to 4.3%)     | 1.09                                |                          |
| Parkinson's disease                     |                      | Global                       | 1210.1 (841.2–1640.7)     | 154.7% (149.4 to 160.9%)            | 15.1 (10.4–20.3)         | 16.2% (13.5 to 19%)                 | 0.67                     |
|                                         |                      | North Africa and Middle East | 44.5 (30.7–60.5)          | 197.3% (182.1 to 214.4%)            | 11.7 (8–15.7)            | 14.8% (9.2 to 21.2%)                | 0.73                     |
|                                         |                      | Algeria                      | 3.4 (2.4–4.7)             | 213.3% (165.9 to 268.6%)            | 11.4 (7.9–15.5)          | 9.2% (-6.4 to 25.7%)                | 0.77                     |
|                                         |                      | Bahrain                      | 0.1 (0.1–0.1)             | 494.3% (387.6 to 617.3%)            | 13 (8.8–17.7)            | 11.2% (-7.8 to 34.3%)               | 0.73                     |
|                                         |                      | Egypt                        | 6.4 (4.3–8.9)             | 147.6% (106.3 to 196.4%)            | 12 (8.2–16.5)            | 16.5% (-1.6 to 37.1%)               | 0.84                     |
|                                         |                      | Iran                         | 8.1 (5.5–11.1)            | 255.1% (228.5 to 282.5%)            | 12 (8.1–16.6)            | 13.2% (8.7 to 17.3%)                | 0.74                     |
|                                         |                      | Iraq                         | 2.1 (1.4–2.8)             | 200% (156.4 to 252.7%)              | 10.5 (7.3–14.2)          | 6.8% (-7.7 to 24.8%)                | 0.67                     |
|                                         |                      | Jordan                       | 0.6 (0.4–0.8)             | 425% (342.9 to 517%)                | 10.9 (7.5–15.1)          | 2.8% (-13.4 to 19.7%)               | 0.78                     |
|                                         |                      | Kuwait                       | 0.2 (0.2–0.3)             | 311.7% (238.6 to 396.9%)            | 10.1 (6.8–13.9)          | -9.2% (-26.3 to 11.5%)              | 0.72                     |
|                                         |                      | Lebanon                      | 0.6 (0.4–0.8)             | 184% (140.8 to 236.9%)              | 10.8 (7.5–14.9)          | 7.8% (-8.5 to 26.4%)                | 0.75                     |
|                                         |                      | Libya                        | 0.5 (0.4–0.8)             | 210.8% (170 to 263.7%)              | 11.8 (8–16.3)            | 12% (-2.8 to 31%)                   | 0.74                     |
|                                         |                      | Morocco                      | 3 (2–4.2)                 | 176.2% (132.8 to 232.9%)            | 10.5 (7.2–14.6)          | 19.4% (0.8 to 42.1%)                | 0.69                     |
|                                         |                      | Palestine                    | 0.2 (0.1–0.3)             | 159.2% (115.7 to 204.1%)            | 11 (7.6–15.1)            | 1.2% (-13.4 to 18%)                 | 0.69                     |
|                                         |                      | Oman                         | 0.2 (0.1–0.3)             | 214% (165.6 to 267.9%)              | 15.6 (10.6–21.4)         | 26.7% (8.5 to 46.6%)                | 0.63                     |
|                                         |                      | Qatar                        | 0.1 (0.1–0.2)             | 807.3% (650 to 989.8%)              | 16.4 (11.3–22.5)         | 18% (0.7 to 36.9%)                  | 0.88                     |
|                                         |                      | Saudi Arabia                 | 1.9 (1.3–2.7)             | 239.4% (184.2 to 304.5%)            | 14.8 (10.2–20.4)         | 27.1% (8.4 to 48.9%)                | 0.6                      |
|                                         |                      | Syrian Arab Republic         | 1.2 (0.8–1.7)             | 158.5% (118.1 to 207.3%)            | 11.5 (8–15.9)            | 10.1% (-6.3 to 30.5%)               | 0.74                     |

**Table S11** Cause- and sex-specific burden, mortality, incidence, and prevalence of neurological conditions in North Africa and Middle East countries

| Measure             | Cause | Location                     | All Ages                  |                                     | Age-standardised         |                                     | Sex ratio<br>2019<br>F:M |
|---------------------|-------|------------------------------|---------------------------|-------------------------------------|--------------------------|-------------------------------------|--------------------------|
|                     |       |                              | Number (thousand)<br>2019 | Percent change<br>From 1990 to 2019 | Rate per 100,000<br>2019 | Percent change<br>From 1990 to 2019 |                          |
|                     |       |                              | Mean (95% UI)             | Mean (95% UI)                       | Mean (95% UI)            | Mean (95% UI)                       |                          |
|                     |       | Tunisia                      | 1.3 (0.9–1.8)             | 202.6% (153.7 to 262.6%)            | 11.2 (7.7–15.2)          | 13.9% (-3.3 to 34.8%)               | 0.73                     |
|                     |       | Türkiye                      | 10.3 (7–14.2)             | 220.9% (175.2 to 275.1%)            | 12.3 (8.4–16.8)          | 21.5% (4.3 to 41.8%)                | 0.71                     |
|                     |       | United Arab Emirates         | 0.5 (0.3–0.7)             | 907.8% (719.4 to 1151.3%)           | 16.1 (11.3–22.3)         | 10.9% (-4.2 to 28.2%)               | 0.78                     |
|                     |       | Yemen                        | 1 (0.7–1.5)               | 204.1% (154 to 263.5%)              | 9 (6.2–12.4)             | 9.6% (-7.1 to 29.6%)                | 0.76                     |
|                     |       | Afghanistan                  | 1.1 (0.7–1.5)             | 63.8% (37.9 to 94.7%)               | 9.6 (6.5–13.3)           | -4.1% (-17.2 to 11.4%)              | 0.72                     |
|                     |       | Sudan                        | 1.7 (1.1–2.3)             | 102.3% (69 to 143%)                 | 9.9 (6.8–14)             | 1.8% (-14.6 to 21.1%)               | 0.7                      |
| Idiopathic epilepsy |       | Global                       | 7740.8 (4810.3–11216.7)   | 43.7% (18.7 to 76.3%)               | 101.1 (63.1–146.8)       | 1.4% (-15.4 to 23.2%)               | 0.91                     |
|                     |       | North Africa and Middle East | 603.1 (342.3–938.7)       | 47.5% (-1 to 119%)                  | 101 (57.3–156.5)         | -9.3% (-39.8 to 33.8%)              | 0.87                     |
|                     |       | Algeria                      | 38.7 (8.7–80)             | 15.9% (-75.9 to 408.9%)             | 94.6 (21.2–196.2)        | -22.9% (-83.9 to 237%)              | 0.91                     |
|                     |       | Bahrain                      | 1.5 (0.4–3.3)             | 93.9% (-54.7 to 821.7%)             | 125.4 (29.5–263.3)       | -27.4% (-82.5 to 245.2%)            | 0.92                     |
|                     |       | Egypt                        | 87.3 (21–178)             | 54.2% (-65.2 to 647.7%)             | 86.5 (20.9–177.8)        | -9.2% (-79.5 to 337.3%)             | 0.77                     |
|                     |       | Iran                         | 79.9 (45.7–122.2)         | 5.9% (-27.2 to 51.5%)               | 100 (57.2–152.2)         | -14.4% (-41.4 to 21.7%)             | 0.87                     |
|                     |       | Iraq                         | 39.7 (8.4–82.1)           | 95.1% (-53.5 to 838.5%)             | 92.3 (20–189.2)          | -15.6% (-80.5 to 286.1%)            | 0.91                     |
|                     |       | Jordan                       | 10.5 (2.4–23.1)           | 154.2% (-40.2 to 939.2%)            | 88.5 (20.3–192.5)        | -12.8% (-79.2 to 245.1%)            | 0.89                     |
|                     |       | Kuwait                       | 4 (1–9)                   | 92.1% (-51.6 to 741.6%)             | 103.4 (23.9–231)         | -15.2% (-78.7 to 270.3%)            | 0.91                     |
|                     |       | Lebanon                      | 4.6 (1.1–10)              | 24.1% (-71.5 to 456%)               | 91.5 (21.8–198.7)        | -16.9% (-81.2 to 270.9%)            | 0.88                     |
|                     |       | Libya                        | 5.5 (1.6–10.9)            | 7.8% (-69.3 to 350.6%)              | 85.6 (25–167.6)          | -26.2% (-78.6 to 201%)              | 0.86                     |
|                     |       | Morocco                      | 33.7 (7.3–72.1)           | 30.9% (-74.5 to 553.2%)             | 96 (21–203.5)            | -0.5% (-80.9 to 388.9%)             | 0.96                     |
|                     |       | Palestine                    | 4.7 (1.1–9.8)             | 108.4% (-54.9 to 925.8%)            | 92 (22.5–190.6)          | -10.2% (-80.5 to 341.2%)            | 0.92                     |
|                     |       | Oman                         | 3.9 (0.9–8.3)             | 107.9% (-53.3 to 851.7%)            | 92.8 (22.2–199.6)        | -0.4% (-77.1 to 347%)               | 0.89                     |
|                     |       | Qatar                        | 2.5 (0.6–5.6)             | 355.7% (9.8 to 1964.2%)             | 103.9 (25.2–227.9)       | -22.8% (-80.9 to 249.8%)            | 1.01                     |
|                     |       | Saudi Arabia                 | 51.6 (12.7–107.9)         | 142.1% (-39.5 to 872.6%)            | 152.9 (37.8–320)         | 12.9% (-72.7 to 356.7%)             | 1.01                     |
|                     |       | Syrian Arab Republic         | 11.6 (2.7–24.3)           | -3.4% (-79.6 to 382.7%)             | 79.9 (18.6–167.4)        | -6.2% (-79.8 to 370.4%)             | 0.92                     |
|                     |       | Tunisia                      | 8.7 (2–19.2)              | 23.8% (-69.5 to 529.6%)             | 78.3 (18.3–168)          | -0.5% (-75.3 to 381.1%)             | 0.95                     |
|                     |       | Türkiye                      | 102.4 (25–214)            | 18.7% (-71.1 to 432.2%)             | 131.3 (32.4–273.9)       | -5.2% (-76.5 to 327.2%)             | 0.79                     |
|                     |       | United Arab Emirates         | 11.9 (3.1–23.5)           | 251.2% (-12.1 to 1308.2%)           | 152.1 (38.2–303.4)       | -23.7% (-81.4 to 211.6%)            | 0.83                     |
|                     |       | Yemen                        | 25.7 (5.5–56.3)           | 85.9% (-62.5 to 936.9%)             | 76.5 (16.8–162.9)        | -15.5% (-83.6 to 372.7%)            | 0.87                     |
|                     |       | Afghanistan                  | 37.8 (6.4–83.6)           | 185.9% (-42 to 2058.3%)             | 92 (15.6–202.9)          | -16.3% (-83.1 to 512.7%)            | 1.07                     |
|                     |       | Sudan                        | 36.3 (8–79.4)             | 84.4% (-56.9 to 958.2%)             | 84.3 (18.4–183.6)        | -5.1% (-77.8 to 449.1%)             | 0.86                     |
| Multiple sclerosis  |       | Global                       | 451.2 (320.7–591.5)       | 71.3% (65.3 to 77.1%)               | 5.5 (3.9–7.1)            | -5.8% (-8.6 to -2.9%)               | 1.93                     |
|                     |       | North Africa and Middle East | 57.7 (40.8–76.8)          | 169.3% (156.5 to 183.1%)            | 10 (7.1–13.3)            | 10.9% (6.1 to 16.3%)                | 1.88                     |
|                     |       | Algeria                      | 4.5 (3.1–6.3)             | 218.1% (167.6 to 278%)              | 10.8 (7.3–14.9)          | 25.3% (6.4 to 48.3%)                | 1.86                     |
|                     |       | Bahrain                      | 0.2 (0.1–0.2)             | 464.7% (361.2 to 595.2%)            | 8.4 (5.5–11.6)           | 25.3% (6.2 to 47.9%)                | 1.96                     |
|                     |       | Egypt                        | 4.8 (3.2–6.8)             | 160.1% (121.2 to 202.7%)            | 5.5 (3.7–7.8)            | 22.6% (4.4 to 43.5%)                | 1.87                     |
|                     |       | Iran                         | 12 (8.4–15.9)             | 133.3% (117.5 to 150.8%)            | 13 (9.1–17.2)            | -4.8% (-10.5 to 1.6%)               | 2.00                     |
|                     |       | Iraq                         | 3.3 (2.2–4.8)             | 273% (215 to 339.5%)                | 9.7 (6.4–13.7)           | 19.1% (0.9 to 40.6%)                | 1.83                     |
|                     |       | Jordan                       | 1.2 (0.8–1.7)             | 343.4% (251.7 to 443.3%)            | 12.1 (7.9–16.6)          | -1% (-21.1 to 20%)                  | 1.96                     |
|                     |       | Kuwait                       | 0.7 (0.5–1)               | 468% (369.2 to 600.9%)              | 13.5 (9.1–18.5)          | 56.2% (32.3 to 85.2%)               | 1.63                     |
|                     |       | Lebanon                      | 0.7 (0.5–1)               | 174.4% (129 to 232.9%)              | 13.6 (9.1–18.6)          | 33% (11.9 to 61.6%)                 | 1.84                     |
|                     |       | Libya                        | 0.8 (0.5–1.1)             | 253.4% (192.9 to 321.9%)            | 10.5 (7.2–14.6)          | 29.1% (8.3 to 54.8%)                | 1.72                     |
|                     |       | Morocco                      | 3.9 (2.5–5.4)             | 145.6% (107 to 193.4%)              | 10.4 (6.9–14.5)          | 23.9% (4.6 to 46.7%)                | 1.85                     |
|                     |       | Palestine                    | 0.4 (0.3–0.5)             | 263.1% (206 to 331.9%)              | 10.5 (7–14.5)            | 16.9% (-0.6 to 39.5%)               | 1.68                     |
|                     |       | Oman                         | 0.4 (0.3–0.6)             | 346.2% (275.8 to 434%)              | 8.8 (5.9–12.2)           | 30.8% (10.3 to 55.9%)               | 1.61                     |
|                     |       | Qatar                        | 0.5 (0.3–0.6)             | 1172.4% (915.4 to 1561.2%)          | 14.1 (9.8–18.9)          | 52.2% (26 to 86.9%)                 | 2.49                     |
|                     |       | Saudi Arabia                 | 2.8 (1.8–4.1)             | 353.6% (279.3 to 435.7%)            | 7.3 (4.8–10.2)           | 25.4% (6.8 to 45.1%)                | 2.03                     |
|                     |       | Syrian Arab Republic         | 1.5 (1–2.1)               | 124.9% (89.3 to 167.5%)             | 10.8 (7.3–15)            | 22.4% (3.8 to 43.8%)                | 1.98                     |
|                     |       | Tunisia                      | 1.7 (1.1–2.3)             | 165% (124 to 214.2%)                | 12.7 (8.7–17.3)          | 27.1% (6.9 to 50.3%)                | 1.86                     |
|                     |       | Türkiye                      | 11.8 (8.3–15.3)           | 109.3% (78 to 144.8%)               | 12.5 (8.8–16.3)          | 2.9% (-11.9 to 20%)                 | 1.69                     |



**Table S11** Cause- and sex-specific burden, mortality, incidence, and prevalence of neurological conditions in North Africa and Middle East countries

| Measure               |                              | All Ages                  |                                     | Age-standardised         |                                     | Sex ratio |
|-----------------------|------------------------------|---------------------------|-------------------------------------|--------------------------|-------------------------------------|-----------|
|                       |                              | Number (thousand)<br>2019 | Percent change<br>From 1990 to 2019 | Rate per 100,000<br>2019 | Percent change<br>From 1990 to 2019 |           |
| Cause                 | Location                     | Mean (95% UI)             | Mean (95% UI)                       | Mean (95% UI)            | Mean (95% UI)                       | F:M       |
| Migraine              | United Arab Emirates         | 0.8 (0.5–1.2)             | 699% (539.2 to 921.1%)              | 6.3 (4.3–8.6)            | -1.4% (-17.9 to 19.9%)              | 1.79      |
|                       | Yemen                        | 1.4 (0.9–1.9)             | 249.8% (197.8 to 314.9%)            | 6.2 (4.1–8.6)            | 21.6% (4.4 to 42.9%)                | 1.64      |
|                       | Afghanistan                  | 2.6 (1.7–3.6)             | 260.4% (199 to 333.6%)              | 10.8 (7.1–14.8)          | 17.9% (-1.6 to 41.8%)               | 1.94      |
|                       | Sudan                        | 1.8 (1.2–2.5)             | 176.2% (132.5 to 220.5%)            | 6.1 (4.1–8.5)            | 22.1% (2.7 to 41.7%)                | 1.68      |
|                       | Global                       | 42077.7 (6418.4–95645.2)  | 56.6% (52.6 to 62.1%)               | 525.5 (78.8–1194)        | 1.5% (-4.4 to 3.3%)                 | 1.7       |
|                       | North Africa and Middle East | 3793.2 (645.3–8665.8)     | 102.1% (93.2 to 125.1%)             | 601.4 (107–1371.8)       | 0% (-1.6 to 1.6%)                   | 1.7       |
|                       | Algeria                      | 260 (44.3–590)            | 89% (76.7 to 120.2%)                | 602.5 (103.9–1372.1)     | -0.2% (-3.2 to 3.1%)                | 1.67      |
|                       | Bahrain                      | 9.5 (1.8–21.2)            | 219.3% (197 to 279.3%)              | 564.5 (100.5–1278.1)     | -0.7% (-3.9 to 2.8%)                | 1.66      |
|                       | Egypt                        | 619.6 (96.7–1426.4)       | 98.2% (84.3 to 113.8%)              | 621.1 (104–1420.2)       | 1.9% (-5.1 to 9.1%)                 | 1.74      |
|                       | Iran                         | 571.7 (107–1282.2)        | 77.6% (63.7 to 117.4%)              | 628.3 (115.2–1411.2)     | -0.3% (-3.6 to 4.1%)                | 1.66      |
|                       | Iraq                         | 253.2 (40.1–580.5)        | 181.6% (170.8 to 206.2%)            | 595.4 (102.8–1355.6)     | 0.3% (-2.8 to 3.2%)                 | 1.67      |
|                       | Jordan                       | 70.1 (11.9–160.3)         | 250.2% (230.2 to 298.6%)            | 590.3 (104–1339.1)       | -0.8% (-4 to 2.5%)                  | 1.66      |
|                       | Kuwait                       | 29.8 (5.2–67.4)           | 190.2% (171.1 to 225.4%)            | 578.3 (99.7–1315.1)      | 3.2% (-2.3 to 8.6%)                 | 1.68      |
|                       | Lebanon                      | 32 (5.6–73.1)             | 76.4% (68.2 to 92.7%)               | 605.8 (104–1385.5)       | 0.5% (-2.7 to 3.5%)                 | 1.67      |
|                       | Libya                        | 44.9 (7.7–101.7)          | 103.6% (88.6 to 141.3%)             | 594.7 (104–1347)         | 1.3% (-1.9 to 4.4%)                 | 1.67      |
|                       | Morocco                      | 226.8 (38.7–515.5)        | 58.5% (50.7 to 80.5%)               | 601.7 (104.2–1370.5)     | -0.3% (-3.3 to 3%)                  | 1.66      |
|                       | Palestine                    | 28.5 (4.4–66.3)           | 177.7% (166.5 to 199.2%)            | 596.1 (102.5–1357.3)     | -1.1% (-4.1 to 1.9%)                | 1.68      |
|                       | Oman                         | 28.4 (4.9–64.4)           | 185% (166.5 to 226.5%)              | 554.2 (98.7–1256.8)      | -1.4% (-4.5 to 1.9%)                | 1.67      |
|                       | Qatar                        | 18.1 (3.2–40.5)           | 601.2% (567.3 to 669.2%)            | 523 (94.3–1174.9)        | -2.7% (-6.2 to 0.8%)                | 1.66      |
|                       | Saudi Arabia                 | 234.2 (41.4–528.2)        | 176.4% (152.8 to 229.1%)            | 562 (99.4–1276.9)        | -1.2% (-5.9 to 3.8%)                | 1.55      |
|                       | Syrian Arab Republic         | 91.6 (15.5–212.2)         | 39.1% (31.2 to 62.3%)               | 609.9 (105.1–1394.5)     | 1.7% (-1.9 to 5.2%)                 | 1.68      |
| Tunisia               | 74.3 (13.2–168.6)            | 54.9% (45.1 to 82.1%)     | 606.3 (104.4–1382.7)                | 0.3% (-2.6 to 3.4%)      | 1.67                                |           |
| Türkiye               | 528.1 (101.8–1197.4)         | 56.6% (45.4 to 81.9%)     | 589.6 (110.2–1340.7)                | 0.2% (-4.5 to 5.2%)      | 1.88                                |           |
| United Arab Emirates  | 60.2 (12–134)                | 473% (424 to 588.1%)      | 535.6 (97.8–1203.7)                 | -0.7% (-4.3 to 3.1%)     | 1.66                                |           |
| Yemen                 | 175.4 (26.6–404.4)           | 169% (158.9 to 186.6%)    | 596.7 (104.2–1356.8)                | 0.1% (-2.9 to 3.2%)      | 1.65                                |           |
| Afghanistan           | 198.8 (30.2–469.5)           | 244.1% (220.3 to 261.8%)  | 587.4 (103–1342.7)                  | -1.3% (-4.9 to 3.2%)     | 1.67                                |           |
| Sudan                 | 234.3 (36.7–542)             | 122.2% (114.9 to 132.9%)  | 601.9 (104.6–1369.5)                | -0.1% (-3.2 to 3.2%)     | 1.67                                |           |
| Tension-type headache | Global                       | 4541.7 (1395.5–14981.3)   | 57.8% (45.1 to 65.9%)               | 56.2 (17–188.5)          | -2.5% (-5.4 to 1.1%)                | 1.25      |
|                       | North Africa and Middle East | 416.6 (138.3–1196.8)      | 115.5% (84.9 to 132.3%)             | 68.1 (22.8–195.5)        | 1% (-9.5 to 8.7%)                   | 1.28      |
|                       | Algeria                      | 28.5 (9.6–79.5)           | 106.7% (73.1 to 140.3%)             | 66.7 (22.6–189)          | 0.3% (-10.2 to 7.9%)                | 1.29      |
|                       | Bahrain                      | 1.1 (0.4–3.1)             | 254.2% (197.7 to 330.7%)            | 64.6 (21.3–189.3)        | -0.3% (-10.7 to 7.7%)               | 1.29      |
|                       | Egypt                        | 65.2 (21–196.7)           | 100.8% (75 to 120.6%)               | 69.1 (22.6–207.8)        | 1.4% (-10.1 to 10.8%)               | 1.29      |
|                       | Iran                         | 70.2 (23–207.1)           | 103.8% (70.9 to 131.5%)             | 77.6 (24.9–236.4)        | 5.2% (-5.7 to 15.9%)                | 1.14      |
|                       | Iraq                         | 26.3 (8.7–77)             | 193.4% (151.1 to 230.5%)            | 66.2 (22.1–190.3)        | 0.7% (-11.1 to 9.1%)                | 1.29      |
|                       | Jordan                       | 7.4 (2.5–21.8)            | 276.6% (221.8 to 332.8%)            | 66.2 (22.7–191.4)        | 0.1% (-10.9 to 8.3%)                | 1.29      |
|                       | Kuwait                       | 3.2 (1.1–9)               | 204.5% (159.1 to 260.4%)            | 62.8 (20.8–186.4)        | 1.5% (-10.4 to 11.9%)               | 1.4       |
|                       | Lebanon                      | 3.6 (1.2–10)              | 86.4% (59 to 108.4%)                | 67 (22.7–191.7)          | 0.8% (-10.8 to 9.4%)                | 1.29      |
|                       | Libya                        | 4.9 (1.7–13.9)            | 122.3% (84.9 to 164.2%)             | 66.4 (22.8–191)          | 1.1% (-11.2 to 9.5%)                | 1.29      |
|                       | Morocco                      | 24.8 (8.5–69.4)           | 70.5% (47.5 to 93.4%)               | 66.5 (22.7–187.3)        | 0.2% (-9.8 to 8.1%)                 | 1.29      |
|                       | Palestine                    | 2.9 (1–8.6)               | 187.4% (144.1 to 219.3%)            | 66.2 (22.1–187.5)        | -0.3% (-13 to 9.3%)                 | 1.3       |
|                       | Oman                         | 3.2 (1–9)                 | 208.1% (154.1 to 256.4%)            | 64.3 (21.6–190.1)        | 0% (-15.4 to 10.8%)                 | 1.29      |
|                       | Qatar                        | 2.1 (0.7–6)               | 643.8% (552 to 739.5%)              | 62 (20.7–184.7)          | -1.4% (-11.6 to 7.2%)               | 1.29      |
|                       | Saudi Arabia                 | 25.6 (9.1–70.1)           | 202% (136.9 to 255%)                | 63 (22–180.3)            | -0.3% (-18.6 to 10.8%)              | 1.3       |
|                       | Syrian Arab Republic         | 9.8 (3.4–28.4)            | 51.2% (24.9 to 78.8%)               | 67 (22.9–189.7)          | 1.1% (-10.5 to 9.5%)                | 1.29      |
|                       | Tunisia                      | 8.4 (2.9–23.5)            | 70.6% (42.7 to 97.2%)               | 67 (22.6–192.5)          | 0.7% (-10.7 to 8.5%)                | 1.3       |
|                       | Türkiye                      | 60.7 (21.7–160.1)         | 71.5% (44.9 to 93.8%)               | 66.6 (23.6–180)          | 0.8% (-10 to 10.1%)                 | 1.36      |
|                       | United Arab Emirates         | 7.4 (2.4–20.5)            | 542.2% (427.1 to 676.1%)            | 63.2 (20.7–187.8)        | 0% (-12.6 to 8.9%)                  | 1.29      |

**Table S11** Cause- and sex-specific burden, mortality, incidence, and prevalence of neurological conditions in North Africa and Middle East countries

| Measure                      |                              | All Ages                  |                                     | Age-standardised         |                                     | Sex ratio |
|------------------------------|------------------------------|---------------------------|-------------------------------------|--------------------------|-------------------------------------|-----------|
|                              |                              | Number (thousand)<br>2019 | Percent change<br>From 1990 to 2019 | Rate per 100,000<br>2019 | Percent change<br>From 1990 to 2019 |           |
| Cause                        | Location                     | Mean (95% UI)             | Mean (95% UI)                       | Mean (95% UI)            | Mean (95% UI)                       | F:M       |
| Motor neuron disease         | Yemen                        | 17.6 (5.8–51.7)           | 176.7% (140 to 209.4%)              | 66.1 (22.8–185.6)        | 0.6% (-11.1 to 9.8%)                | 1.28      |
|                              | Afghanistan                  | 19.6 (6.3–57.7)           | 231.4% (191.2 to 263.2%)            | 65.2 (22.1–183.3)        | -0.1% (-9.6 to 7.9%)                | 1.29      |
|                              | Sudan                        | 23.6 (7.8–69.1)           | 125% (95.3 to 148.4%)               | 66.4 (23.2–189)          | 0.5% (-11.8 to 9.8%)                | 1.29      |
|                              | Global                       | 57.1 (40–76.3)            | 68.8% (62.4 to 75.6%)               | 0.7 (0.5–1)              | 1.9% (0.6 to 3.3%)                  | 0.82      |
|                              | North Africa and Middle East | 3.3 (2.3–4.6)             | 103.3% (92.1 to 113.8%)             | 0.5 (0.4–0.8)            | 3.6% (2 to 5.1%)                    | 0.86      |
|                              | Algeria                      | 0.2 (0.1–0.3)             | 89.9% (74.6 to 104.9%)              | 0.5 (0.3–0.7)            | 2% (-1.6 to 5.7%)                   | 0.85      |
|                              | Bahrain                      | <0.1 (<0.1–<0.1)          | 235.2% (197.8 to 274.8%)            | 0.6 (0.4–0.8)            | 3.7% (-0.5 to 7.9%)                 | 0.86      |
|                              | Egypt                        | 0.5 (0.3–0.6)             | 96.4% (87.1 to 105.5%)              | 0.5 (0.3–0.7)            | 4.2% (0.6 to 8.2%)                  | 0.87      |
|                              | Iran                         | 0.5 (0.4–0.8)             | 86.9% (70.6 to 103.5%)              | 0.6 (0.4–0.9)            | 6.6% (4.9 to 8.4%)                  | 0.89      |
|                              | Iraq                         | 0.2 (0.1–0.3)             | 170.7% (154.7 to 186.6%)            | 0.5 (0.4–0.7)            | 2.6% (-1.2 to 6.4%)                 | 0.88      |
|                              | Jordan                       | 0.1 (0–0.1)               | 252.1% (224.4 to 277.9%)            | 0.6 (0.4–0.8)            | 3% (-1.7 to 7.2%)                   | 0.84      |
|                              | Kuwait                       | <0.1 (<0.1–<0.1)          | 166.7% (143.3 to 192.9%)            | 0.7 (0.5–0.9)            | -4.2% (-9.8 to 1.1%)                | 0.85      |
|                              | Lebanon                      | <0.1 (<0.1–<0.1)          | 77.2% (65.9 to 87.5%)               | 0.6 (0.4–0.8)            | 2.8% (-1 to 6.9%)                   | 0.87      |
|                              | Libya                        | <0.1 (<0.1–<0.1)          | 81.7% (64.2 to 98.3%)               | 0.5 (0.3–0.7)            | -4.9% (-8.6 to -0.9%)               | 0.91      |
|                              | Morocco                      | 0.2 (0.1–0.3)             | 62.3% (51.4 to 73.3%)               | 0.5 (0.3–0.7)            | 4% (0 to 8%)                        | 0.84      |
|                              | Palestine                    | <0.1 (<0.1–<0.1)          | 175.2% (158.3 to 189.6%)            | 0.5 (0.4–0.8)            | 4% (0 to 7.7%)                      | 0.89      |
|                              | Oman                         | <0.1 (<0.1–<0.1)          | 182.6% (159.7 to 207.3%)            | 0.5 (0.3–0.7)            | 2.7% (-1.3 to 6.9%)                 | 0.87      |
|                              | Qatar                        | <0.1 (<0.1–<0.1)          | 631.4% (587.1 to 678.9%)            | 0.6 (0.4–0.8)            | 4.2% (-0.3 to 8.7%)                 | 0.86      |
|                              | Saudi Arabia                 | 0.2 (0.1–0.3)             | 166.9% (141.5 to 192.2%)            | 0.5 (0.4–0.7)            | 2.9% (-0.9 to 6.8%)                 | 0.85      |
|                              | Syrian Arab Republic         | 0.1 (0.1–0.1)             | 28.3% (17.7 to 41.1%)               | 0.5 (0.4–0.8)            | 0.5% (-3.4 to 4.6%)                 | 0.87      |
| Tunisia                      | 0.1 (0–0.1)                  | 61.1% (48.2 to 75.5%)     | 0.6 (0.4–0.8)                       | 4.1% (-0.5 to 8.1%)      | 0.89                                |           |
| Türkiye                      | 0.7 (0.5–0.9)                | 77.3% (64.6 to 89.4%)     | 0.8 (0.5–1)                         | 10.2% (6.2 to 14.5%)     | 0.83                                |           |
| United Arab Emirates         | 0.1 (0–0.1)                  | 472.1% (400 to 543.2%)    | 0.6 (0.4–0.8)                       | -0.6% (-4.4 to 4.5%)     | 0.87                                |           |
| Yemen                        | 0.1 (0.1–0.1)                | 153% (137.6 to 168.2%)    | 0.3 (0.2–0.5)                       | -0.8% (-4.5 to 3.2%)     | 0.86                                |           |
| Afghanistan                  | 0.1 (0.1–0.2)                | 238.3% (219.8 to 260%)    | 0.4 (0.3–0.6)                       | 0.2% (-4 to 4.2%)        | 0.82                                |           |
| Sudan                        | 0.1 (0.1–0.2)                | 123.4% (113.4 to 134.2%)  | 0.4 (0.2–0.5)                       | 4.1% (0.4 to 8.2%)       | 0.86                                |           |
| Other neurological disorders | Global                       | 2130.4 (1392.1–3016.4)    | 93.3% (65.4 to 128.5%)              | 28.3 (18.4–40.4)         | 40.6% (20.9 to 64.7%)               | 0.94      |
|                              | North Africa and Middle East | 177.2 (106.1–265.1)       | 98.6% (41.9 to 177.9%)              | 29.4 (18–43.9)           | 25.5% (-8.9 to 71%)                 | 0.92      |
| Algeria                      | 11.6 (4–22.1)                | 61.2% (-48.7 to 478.3%)   | 28.6 (10.1–54.1)                    | 12.4% (-63 to 244%)      | 0.96                                |           |
| Bahrain                      | 0.4 (0.1–0.8)                | 168.8% (-11.7 to 924.4%)  | 33.5 (10.8–66.6)                    | 8.3% (-65.7 to 260.8%)   | 0.98                                |           |
| Egypt                        | 27.1 (8.4–51.8)              | 120.5% (-34.1 to 711%)    | 26.4 (9.5–48.8)                     | 30.6% (-56.7 to 292.5%)  | 0.81                                |           |
| Iran                         | 23.8 (14.3–35.3)             | 40.7% (3.5 to 90.8%)      | 30.4 (18.3–45.5)                    | 19.7% (-12.2 to 57.7%)   | 0.94                                |           |
| Iraq                         | 12.2 (3.6–24)                | 175.6% (-13.8 to 915.1%)  | 27.9 (9.7–53.7)                     | 24.2% (-56.8 to 272.3%)  | 0.95                                |           |
| Jordan                       | 3.3 (1.1–6.8)                | 263.1% (14.7 to 1066.3%)  | 27.8 (10.1–54.6)                    | 26.7% (-54.8 to 240.1%)  | 0.95                                |           |
| Kuwait                       | 1.2 (0.4–2.4)                | 176.9% (-1 to 807.8%)     | 31.2 (11.4–65)                      | 25% (-53.9 to 247.1%)    | 0.96                                |           |
| Lebanon                      | 1.4 (0.5–2.8)                | 73% (-37.5 to 470.2%)     | 28.3 (10.4–55.2)                    | 21.8% (-55 to 271.5%)    | 0.95                                |           |
| Libya                        | 1.6 (0.7–3)                  | 47.7% (-42.9 to 404.3%)   | 25.9 (10.8–47.7)                    | 10.2% (-56.3 to 209.3%)  | 0.92                                |           |
| Morocco                      | 10.2 (3.3–20.3)              | 80.6% (-47.6 to 585.6%)   | 29.1 (9.6–58)                       | 40.2% (-57.1 to 346.5%)  | 0.99                                |           |
| Palestine                    | 1.5 (0.4–2.9)                | 195.7% (-14.6 to 1003.2%) | 27.5 (9.6–51.9)                     | 27.6% (-55.3 to 278.1%)  | 0.97                                |           |
| Oman                         | 1.1 (0.4–2.2)                | 171.8% (-21.8 to 887.6%)  | 28.1 (10.4–55.7)                    | 41.7% (-53.9 to 325%)    | 0.94                                |           |
| Qatar                        | 0.7 (0.3–1.4)                | 536.4% (124.1 to 2135.2%) | 30.8 (11.5–61.1)                    | 16.1% (-56.9 to 248.4%)  | 1.04                                |           |
| Saudi Arabia                 | 12.8 (4.1–26.1)              | 195.5% (-14.4 to 925.6%)  | 39.3 (13.3–79.7)                    | 54.1% (-52.8 to 379.6%)  | 0.99                                |           |
| Syrian Arab Republic         | 3.9 (1.3–7.3)                | 42.2% (-55.8 to 438.3%)   | 25.9 (9.4–49.2)                     | 37.1% (-54.2 to 305.1%)  | 0.97                                |           |
| Tunisia                      | 2.7 (1.1–5.1)                | 70.6% (-35.2 to 451.1%)   | 25 (9.6–47.4)                       | 38.2% (-48.7 to 285.9%)  | 1.02                                |           |
| Türkiye                      | 27.2 (10.1–51.7)             | 46.3% (-49 to 378.4%)     | 36.7 (13–71.8)                      | 26.5% (-57.8 to 276.8%)  | 0.84                                |           |
| United Arab Emirates         | 2.8 (0.9–5.4)                | 347.5% (39 to 1491.1%)    | 39.3 (12.8–76.3)                    | 9.5% (-65.6 to 251.2%)   | 0.86                                |           |
| Yemen                        | 8.2 (2.2–17)                 | 162.8% (-28.4 to 1089%)   | 23.5 (7.9–45.9)                     | 20.8% (-61.6 to 293.2%)  | 0.92                                |           |
| Afghanistan                  | 12 (2.9–25.7)                | 308.4% (0 to 1736.2%)     | 27.6 (8.7–55.4)                     | 20.4% (-63.8 to 330.8%)  | 1.09                                |           |

**Table S11** Cause- and sex-specific burden, mortality, incidence, and prevalence of neurological conditions in North Africa and Middle East countries

| Measure                          | Cause                        | Location           | All Ages                  |                                     | Age-standardised         |                                     | Sex ratio<br>2019<br>F:M |
|----------------------------------|------------------------------|--------------------|---------------------------|-------------------------------------|--------------------------|-------------------------------------|--------------------------|
|                                  |                              |                    | Number (thousand)<br>2019 | Percent change<br>From 1990 to 2019 | Rate per 100,000<br>2019 | Percent change<br>From 1990 to 2019 |                          |
|                                  |                              |                    | Mean (95% UI)             | Mean (95% UI)                       | Mean (95% UI)            | Mean (95% UI)                       |                          |
| Headache disorders               | Sudan                        |                    | 11.4 (3.2–23.9)           | 158.3% (-26.2 to 1024.1%)           | 25.4 (9–50.9)            | 31.9% (-56 to 326.6%)               | 0.9                      |
|                                  | Global                       |                    | 46619.4 (9772.9–100161.7) | 56.7% (52.4 to 62.1%)               | 581.8 (119.6–1255.6)     | 1.1% (-4.2 to 2.9%)                 | 1.65                     |
|                                  | North Africa and Middle East |                    | 4209.8 (990.1–9068.3)     | 103.3% (94.5 to 123.7%)             | 669.6 (159.1–1431.3)     | 0.1% (-2.4 to 2.4%)                 | 1.65                     |
|                                  | Algeria                      |                    | 288.4 (67.5–615.9)        | 90.7% (78.3 to 119.7%)              | 669.2 (155.7–1442.3)     | -0.1% (-3.5 to 3.1%)                | 1.62                     |
|                                  | Bahrain                      |                    | 10.6 (2.6–22.3)           | 222.7% (200.3 to 275.9%)            | 629 (149.4–1360.3)       | -0.6% (-3.9 to 2.8%)                | 1.62                     |
|                                  | Egypt                        |                    | 684.8 (147.1–1492)        | 98.4% (84.9 to 112.8%)              | 690.3 (156.4–1488.7)     | 1.9% (-4.8 to 8.6%)                 | 1.69                     |
|                                  | Iran                         |                    | 641.8 (160.7–1355.8)      | 80.2% (66.5 to 117.2%)              | 705.8 (173.2–1503.1)     | 0.3% (-3.3 to 5.8%)                 | 1.59                     |
|                                  | Iraq                         |                    | 279.5 (60.1–621.2)        | 182.7% (170.9 to 204.1%)            | 661.6 (153–1427.4)       | 0.3% (-3.3 to 3.5%)                 | 1.63                     |
|                                  | Jordan                       |                    | 77.5 (17.4–171.6)         | 252.5% (233.2 to 298.1%)            | 656.4 (153.8–1428.7)     | -0.7% (-3.9 to 2.5%)                | 1.62                     |
|                                  | Kuwait                       |                    | 33 (7.6–71.3)             | 191.5% (173.1 to 225.4%)            | 641.1 (146.8–1408)       | 3.1% (-2.3 to 7.9%)                 | 1.65                     |
|                                  | Lebanon                      |                    | 35.5 (8.4–77.1)           | 77.3% (68.9 to 92.6%)               | 672.7 (153.9–1457.6)     | 0.5% (-3.1 to 3.7%)                 | 1.63                     |
|                                  | Libya                        |                    | 49.8 (11.8–107.6)         | 105.3% (90.3 to 140.3%)             | 661.1 (155.4–1425.1)     | 1.3% (-2.2 to 4.6%)                 | 1.63                     |
|                                  | Morocco                      |                    | 251.6 (58.5–545)          | 59.6% (51.6 to 78.5%)               | 668.2 (156.2–1445.1)     | -0.2% (-3.6 to 3.1%)                | 1.62                     |
|                                  | Palestine                    |                    | 31.4 (6.8–70.6)           | 178.6% (166.2 to 198.3%)            | 662.3 (157.1–1439.2)     | -1% (-4.4 to 2.1%)                  | 1.63                     |
|                                  | Oman                         |                    | 31.6 (7.5–67.8)           | 187.2% (168.1 to 223.2%)            | 618.5 (146.4–1332.9)     | -1.2% (-4.9 to 2.6%)                | 1.63                     |
|                                  | Qatar                        |                    | 20.2 (5–42.9)             | 605.4% (571.7 to 667.4%)            | 585 (140.4–1252)         | -2.6% (-5.8 to 0.9%)                | 1.62                     |
|                                  | Saudi Arabia                 |                    | 259.8 (62.7–548.8)        | 178.7% (155.8 to 227.9%)            | 625 (149.7–1343.4)       | -1.1% (-6.2 to 3.8%)                | 1.52                     |
|                                  | Syrian Arab Republic         |                    | 101.4 (22.9–223.8)        | 40.2% (32.3 to 61.8%)               | 676.9 (157.1–1474.2)     | 1.7% (-2.1 to 5.1%)                 | 1.63                     |
|                                  | Tunisia                      |                    | 82.7 (20.2–176.6)         | 56.3% (46.6 to 81.3%)               | 673.3 (158.7–1448.7)     | 0.3% (-3.1 to 3.5%)                 | 1.63                     |
|                                  | Türkiye                      |                    | 588.7 (155.4–1275.3)      | 58% (47.2 to 81%)                   | 656.1 (167.7–1433)       | 0.3% (-4.6 to 5%)                   | 1.82                     |
| United Arab Emirates             |                              | 67.6 (17.6–141.9)  | 479.9% (432.5 to 583%)    | 598.8 (142.4–1275.1)                | -0.7% (-5 to 3%)         | 1.62                                |                          |
| Yemen                            |                              | 193 (40.6–431.5)   | 169.7% (159.4 to 187.2%)  | 662.8 (157.9–1435.6)                | 0.1% (-3.4 to 3.6%)      | 1.61                                |                          |
| Afghanistan                      |                              | 218.4 (44.8–493.2) | 242.9% (219.8 to 259.7%)  | 652.5 (156.7–1422.4)                | -1.2% (-4.5 to 2.9%)     | 1.62                                |                          |
| Sudan                            |                              | 258 (54–579)       | 122.5% (114.3 to 132.3%)  | 668.3 (155.5–1438.9)                | -0.1% (-3.7 to 3.7%)     | 1.62                                |                          |
| <b>YLLs (Years of Life Lost)</b> |                              |                    |                           |                                     |                          |                                     |                          |
| Meningitis                       | Global                       |                    | 15649.9 (13103–18930.7)   | -52.1% (-60.4 to -42.7%)            | 225 (187.3–273.1)        | -57.7% (-65 to -48.8%)              | 0.85                     |
|                                  | North Africa and Middle East |                    | 376.5 (310.2–457.5)       | -72.5% (-79.3 to -64.6%)            | 64.1 (53–77.6)           | -77.2% (-82.4 to -70.9%)            | 0.89                     |
| Headache disorders               | Algeria                      |                    | 14 (11.2–17.7)            | -77.6% (-86.5 to -65%)              | 34.6 (27.8–43.5)         | -82.2% (-88.8 to -73.4%)            | 1.01                     |
|                                  | Bahrain                      |                    | 0.1 (0.1–0.2)             | -54.4% (-66.4 to -39.6%)            | 14.7 (12.2–17.6)         | -77.7% (-82.9 to -71.1%)            | 0.75                     |
|                                  | Egypt                        |                    | 48.3 (31.7–67.1)          | -70.9% (-81.2 to -56.9%)            | 47.7 (31.3–66.4)         | -77.7% (-85.5 to -67.2%)            | 0.67                     |
|                                  | Iran                         |                    | 24.2 (21–27.7)            | -82.4% (-87 to -76.1%)              | 31.7 (27.2–36.5)         | -82.1% (-86.5 to -75.8%)            | 0.79                     |
|                                  | Iraq                         |                    | 25.9 (19.8–33.8)          | -71.8% (-80.9 to -58.8%)            | 61.6 (47.4–78.2)         | -81.3% (-86.9 to -73.7%)            | 0.9                      |
|                                  | Jordan                       |                    | 4.9 (3.9–6.5)             | -6.7% (-36.5 to 38.4%)              | 44 (34.6–57.4)           | -60.4% (-71.9 to -42.9%)            | 0.97                     |
|                                  | Kuwait                       |                    | 0.6 (0.5–0.7)             | -33.4% (-51.4 to -11.7%)            | 16.5 (12.7–21.1)         | -67% (-75.7 to -56.6%)              | 0.59                     |
|                                  | Lebanon                      |                    | 1.2 (0.9–1.7)             | -64.2% (-77 to -45.1%)              | 23.8 (16.8–32.5)         | -72.3% (-81.8 to -59.2%)            | 0.74                     |
|                                  | Libya                        |                    | 1.8 (1.4–2.4)             | -72.1% (-81.8 to -58.5%)            | 31.2 (23.6–40.4)         | -72.9% (-81.3 to -61.5%)            | 0.91                     |
|                                  | Morocco                      |                    | 19.6 (13.1–27.7)          | -84.5% (-90.6 to -76%)              | 61.6 (40.9–87.5)         | -83.3% (-89.8 to -74.7%)            | 0.72                     |
|                                  | Palestine                    |                    | 1.6 (1.3–2.1)             | -79% (-86.9 to -66.3%)              | 32.8 (26.9–40)           | -85% (-89.8 to -77.9%)              | 0.74                     |
|                                  | Oman                         |                    | 0.6 (0.5–0.8)             | -66% (-76.5 to -49.6%)              | 22.9 (19.3–27.9)         | -74.9% (-81.3 to -64.3%)            | 1.4                      |
|                                  | Qatar                        |                    | 0.3 (0.2–0.4)             | -17.1% (-48.5 to 28.8%)             | 17.5 (13.4–22.3)         | -79.3% (-86.8 to -69.8%)            | 2.9                      |
|                                  | Saudi Arabia                 |                    | 7.5 (5.5–10.1)            | -46.8% (-61.4 to -25%)              | 23.7 (18.4–30.4)         | -75.2% (-81.4 to -65.4%)            | 1.23                     |
|                                  | Syrian Arab Republic         |                    | 12.3 (9.3–16)             | -81.4% (-87.6 to -72.5%)            | 91.8 (68.7–121)          | -72% (-80.9 to -59.6%)              | 0.92                     |
|                                  | Tunisia                      |                    | 3.3 (2.3–4.4)             | -79.9% (-87.6 to -68.2%)            | 31.3 (21.8–41.7)         | -80% (-87.5 to -69.4%)              | 0.65                     |
|                                  | Türkiye                      |                    | 16 (13.2–19.4)            | -91.4% (-94.7 to -86.4%)            | 24.4 (20–30.4)           | -90.3% (-94.1 to -85%)              | 0.77                     |
|                                  | United Arab Emirates         |                    | 2.5 (1.5–3.8)             | 16.6% (-31.4 to 70.4%)              | 28.5 (19–40.4)           | -75.9% (-83.4 to -67.4%)            | 0.7                      |
| Yemen                            |                              | 30.8 (20.1–46)     | -57.8% (-73.6 to -32.2%)  | 90 (61.5–129.3)                     | -70% (-80.1 to -55.4%)   | 1.04                                |                          |
| Afghanistan                      |                              | 115.5 (82.3–166.4) | -32.8% (-56.4 to 4.7%)    | 225.5 (164.4–306.1)                 | -74.9% (-83.5 to -63.5%) | 1.12                                |                          |



**Table S11** Cause- and sex-specific burden, mortality, incidence, and prevalence of neurological conditions in North Africa and Middle East countries

| Measure                          | Cause                        | Location          | All Ages                  |                                     | Age-standardised         |                                     | Sex ratio<br>2019<br>F:M |
|----------------------------------|------------------------------|-------------------|---------------------------|-------------------------------------|--------------------------|-------------------------------------|--------------------------|
|                                  |                              |                   | Number (thousand)<br>2019 | Percent change<br>From 1990 to 2019 | Rate per 100,000<br>2019 | Percent change<br>From 1990 to 2019 |                          |
|                                  |                              |                   | Mean (95% UI)             | Mean (95% UI)                       | Mean (95% UI)            | Mean (95% UI)                       |                          |
| Encephalitis                     | Sudan                        |                   | 45 (29.4–69.6)            | -80.4% (-87.9 to -69.3%)            | 96.3 (64.8–140.3)        | -85.3% (-90.4 to -77.7%)            | 0.74                     |
|                                  | Global                       |                   | 4315 (3623.2–5928.3)      | -46.2% (-58.5 to -17.4%)            | 59.2 (49.5–80.9)         | -55.9% (-65.7 to -33.2%)            | 0.86                     |
|                                  | North Africa and Middle East |                   | 231.3 (179.8–314.1)       | 9.8% (-25.4 to 58.2%)               | 38.8 (30.3–52.5)         | -21.8% (-45.9 to 9.5%)              | 1.07                     |
|                                  | Algeria                      |                   | 7.1 (4.7–13.7)            | -9.7% (-47.2 to 43.8%)              | 17.3 (11.7–32.9)         | -32.4% (-58 to 3%)                  | 0.95                     |
|                                  | Bahrain                      |                   | 0.1 (0.1–0.1)             | 52.7% (9.2 to 97%)                  | 9.5 (7.5–12)             | -28.6% (-48.3 to -9.3%)             | 0.94                     |
|                                  | Egypt                        |                   | 61.8 (29.7–99.3)          | -6.1% (-45.9 to 55.8%)              | 59.5 (29.6–95.5)         | -32.7% (-60.1 to 5.5%)              | 0.86                     |
|                                  | Iran                         |                   | 10.2 (7.7–12.1)           | -21.1% (-45.2 to 8.7%)              | 13.5 (9.8–16.2)          | -24.4% (-45.9 to 0.9%)              | 0.86                     |
|                                  | Iraq                         |                   | 29.1 (19.8–39.1)          | 15.1% (-30.7 to 86.4%)              | 67.4 (47–89)             | -34.7% (-58.1 to -2.2%)             | 1.1                      |
|                                  | Jordan                       |                   | 0.9 (0.7–1.3)             | -18.6% (-52.9 to 144.1%)            | 7.8 (5.8–11.4)           | -67.4% (-80.4 to -9.5%)             | 1.23                     |
|                                  | Kuwait                       |                   | 0.3 (0.3–0.4)             | 38.3% (9.1 to 81%)                  | 8.8 (7.1–11.4)           | -30.4% (-44.7 to -10.3%)            | 1.26                     |
|                                  | Lebanon                      |                   | 0.7 (0.4–1.4)             | 8.8% (-34.1 to 66.7%)               | 13.7 (8.2–26.8)          | -19.5% (-48.9 to 19.7%)             | 0.92                     |
|                                  | Libya                        |                   | 0.9 (0.6–1.8)             | -4.4% (-39.8 to 44.2%)              | 15.2 (9.9–29.6)          | -15.9% (-43 to 23.6%)               | 0.96                     |
|                                  | Morocco                      |                   | 7.4 (4.1–15)              | -11.2% (-49.8 to 40.9%)             | 22.9 (12.6–45.6)         | -18.4% (-51.2 to 26.5%)             | 1.43                     |
|                                  | Palestine                    |                   | 0.6 (0.4–0.9)             | 33.7% (-22 to 111.2%)               | 12.1 (9.1–17.7)          | -26.7% (-52.2 to 5.4%)              | 1.18                     |
|                                  | Oman                         |                   | 4.4 (3.2–7.6)             | 6.2% (-33 to 66.1%)                 | 119.1 (91.1–177.2)       | -44.5% (-63 to -14.1%)              | 0.66                     |
|                                  | Qatar                        |                   | 0.2 (0.2–0.4)             | 238.1% (108.4 to 412.1%)            | 11.9 (8.7–16.3)          | -31.3% (-56.3 to 1.4%)              | 1.35                     |
|                                  | Saudi Arabia                 |                   | 8.8 (6.5–12)              | -2.1% (-33.1 to 48%)                | 26.4 (19.8–35.6)         | -54.5% (-69.8 to -31%)              | 1.26                     |
|                                  | Syrian Arab Republic         |                   | 3.2 (2.3–4.4)             | -57.2% (-74.4 to -20.4%)            | 23.7 (17.6–33)           | -44.1% (-65.5 to -0.8%)             | 0.92                     |
|                                  | Tunisia                      |                   | 1.6 (1.3–3)               | -25.7% (-57.6 to 15.8%)             | 15.4 (9.1–31.5)          | -31.5% (-59.2 to 5.4%)              | 0.87                     |
|                                  | Türkiye                      |                   | 10.6 (8.1–13.1)           | -50.2% (-70.5 to -21.4%)            | 15.6 (11.8–19.6)         | -51.4% (-70.6 to -23.6%)            | 0.91                     |
| United Arab Emirates             |                              | 1.3 (0.7–2.8)     | 204.8% (88.7 to 370.6%)   | 16.8 (10.4–32)                      | -22.3% (-48.1 to 16.4%)  | 0.72                                |                          |
| Yemen                            |                              | 10.3 (5.7–20.5)   | 45.6% (-19.9 to 167.3%)   | 27.8 (16.2–54.6)                    | -9.4% (-46.2 to 51.2%)   | 1.18                                |                          |
| Afghanistan                      |                              | 57.7 (36.8–113.5) | 153.3% (68.1 to 262.9%)   | 168.2 (124.6–241.3)                 | -15.1% (-39.9 to 17.6%)  | 1.43                                |                          |
| Sudan                            |                              | 13.6 (7.4–25.9)   | 10.8% (-42.9 to 121.2%)   | 28.8 (16.4–54.8)                    | -24% (-57.6 to 34.5%)    | 1.05                                |                          |
| Tetanus                          | Global                       |                   | 2314.6 (1768.8–3277)      | -89.4% (-92.1 to -83.8%)            | 33.7 (25.6–47.8)         | -90.3% (-92.7 to -85.1%)            | 0.86                     |
|                                  | North Africa and Middle East |                   | 87.4 (53.6–139.5)         | -85.8% (-92.9 to -68.7%)            | 15 (9.2–24.1)            | -88.2% (-93.9 to -76.1%)            | 0.85                     |
|                                  | Algeria                      |                   | 0.5 (0.4–0.9)             | -83% (-93.5 to -41.9%)              | 1.3 (0.9–2.3)            | -86.7% (-94.8 to -60.7%)            | 0.79                     |
|                                  | Bahrain                      |                   | <0.1 (<0.1–<0.1)          | 37.1% (-41 to 114.9%)               | 0.7 (0.6–1.2)            | -39.4% (-75 to -6.6%)               | 1.00                     |
|                                  | Egypt                        |                   | 7.4 (2.2–22)              | -87.3% (-96.4 to -60.1%)            | 7.7 (2.5–23.2)           | -90.8% (-97 to -71.7%)              | 0.69                     |
|                                  | Iran                         |                   | 0.9 (0.7–1.3)             | -94.4% (-97.6 to -82.2%)            | 1.2 (0.9–1.7)            | -94.1% (-97.4 to -82.4%)            | 0.74                     |
|                                  | Iraq                         |                   | 1.8 (1–3)                 | -91.2% (-97.3 to -53.5%)            | 4 (2.3–6.7)              | -93.8% (-98 to -72.8%)              | 0.56                     |
|                                  | Jordan                       |                   | 0.1 (0.1–0.2)             | -71.8% (-86.8 to -12.3%)            | 1 (0.7–1.5)              | -85.7% (-93.3 to -59%)              | 0.72                     |
|                                  | Kuwait                       |                   | <0.1 (<0.1–<0.1)          | 84.7% (-77.8 to 686.7%)             | <0.1 (<0.1–0.1)          | -47.7% (-91 to 74.2%)               | 0.06                     |
|                                  | Lebanon                      |                   | 0.8 (0.2–2.7)             | -57.9% (-93 to 27.8%)               | 14.9 (3.2–50.9)          | -75.8% (-95.7 to -29.1%)            | 1.11                     |
|                                  | Libya                        |                   | 0.1 (0–0.1)               | -69.7% (-88.1 to -8.1%)             | 1.2 (0.7–2)              | -70.5% (-89.8 to -19%)              | 0.72                     |
|                                  | Morocco                      |                   | 7.7 (1.9–28.9)            | -95% (-98.8 to -80.8%)              | 25.7 (6.3–98.1)          | -93.9% (-98.5 to -76.2%)            | 0.84                     |
|                                  | Palestine                    |                   | 0.1 (0.1–0.1)             | -90.5% (-97.4 to -52.6%)            | 1.3 (0.9–1.9)            | -92.7% (-98 to -67.8%)              | 0.71                     |
|                                  | Oman                         |                   | <0.1 (<0.1–<0.1)          | -79.7% (-93.8 to -19.4%)            | 1 (0.7–1.3)              | -90.3% (-96.7 to -62.2%)            | 0.77                     |
|                                  | Qatar                        |                   | <0.1 (<0.1–<0.1)          | 195.1% (8.3 to 463.4%)              | 0.7 (0.5–1)              | -50.2% (-83.3 to 5%)                | 0.91                     |
|                                  | Saudi Arabia                 |                   | 0.7 (0.2–1.3)             | -94.2% (-99.2 to -68.2%)            | 2.1 (0.8–3.5)            | -96.5% (-99.4 to -81.2%)            | 0.58                     |
|                                  | Syrian Arab Republic         |                   | 0.3 (0.2–0.6)             | -97.6% (-99.2 to -89.5%)            | 2.4 (1.3–5)              | -95.6% (-98.6 to -81.4%)            | 0.52                     |
|                                  | Tunisia                      |                   | 0.1 (0.1–0.2)             | -83.7% (-94 to -56.6%)              | 1 (0.7–1.8)              | -83.8% (-94 to -57.1%)              | 0.8                      |
|                                  | Türkiye                      |                   | 0.7 (0.5–1)               | -98% (-98.9 to -94.1%)              | 1 (0.8–1.4)              | -98.3% (-99 to -95.6%)              | 0.83                     |
|                                  | United Arab Emirates         |                   | 1.1 (0.5–1.7)             | -8% (-83.2 to 209.2%)               | 33.2 (8.4–54.9)          | -86% (-96.4 to -46.5%)              | 1.79                     |
| Yemen                            |                              | 4.2 (1.7–8.8)     | -85.7% (-95.7 to -34.5%)  | 11.2 (5–23.3)                       | -89.9% (-96.5 to -61.6%) | 0.51                                |                          |
| Afghanistan                      |                              | 58.1 (32.9–101.6) | -74.6% (-88.5 to -32.2%)  | 113.9 (70.4–179.3)                  | -90.2% (-94.9 to -79.6%) | 1.03                                |                          |
| Sudan                            |                              | 2.7 (1.1–5.6)     | -92.9% (-97.4 to -77.6%)  | 5.6 (2.6–12.1)                      | -94.3% (-97.8 to -83.9%) | 0.48                                |                          |
| Brain and central nervous system | Global                       |                   | 8530.5 (6625.1–9447.6)    | 39.7% (-13.7 to 66%)                | 107.4 (83.1–119)         | -10.8% (-43.7 to 4.8%)              | 0.71                     |

**Table S11** Cause- and sex-specific burden, mortality, incidence, and prevalence of neurological conditions in North Africa and Middle East countries

| Measure          | Location                     | All Ages                     |                                     | Age-standardised         |                                     | Sex ratio<br>2019<br>F:M |
|------------------|------------------------------|------------------------------|-------------------------------------|--------------------------|-------------------------------------|--------------------------|
|                  |                              | Number (thousand)<br>2019    | Percent change<br>From 1990 to 2019 | Rate per 100,000<br>2019 | Percent change<br>From 1990 to 2019 |                          |
|                  |                              | Mean (95% UI)                | Mean (95% UI)                       | Mean (95% UI)            | Mean (95% UI)                       |                          |
| cancer           | North Africa and Middle East | 705.6 (486–836.9)            | 69.9% (0.4 to 130.4%)               | 126.4 (86.6–149.3)       | -5.6% (-40.2 to 22.6%)              | 0.86                     |
|                  | Algeria                      | 23.3 (14.1–29.7)             | 55.2% (-17.1 to 119%)               | 57.4 (34.8–72.8)         | -6.6% (-50.2 to 27.9%)              | 0.98                     |
|                  | Bahrain                      | 1 (0.6–1.3)                  | 183.3% (66.3 to 297.5%)             | 71.5 (45.8–91.6)         | -25.8% (-56.1 to 5.3%)              | 0.83                     |
|                  | Egypt                        | 88 (60.6–123.9)              | 72.8% (-6.2 to 152.9%)              | 97.6 (67.4–139.6)        | -2.2% (-41 to 39.4%)                | 0.83                     |
|                  | Iran                         | 126.2 (66.6–150.7)           | 39.2% (-28.5 to 80%)                | 153.5 (80.7–183.6)       | -11.4% (-50.6 to 7.8%)              | 0.89                     |
|                  | Iraq                         | 78.8 (57.2–102)              | 162.9% (31.3 to 323.7%)             | 222.7 (161.1–285.4)      | 14.7% (-39.3 to 78.9%)              | 1.02                     |
|                  | Jordan                       | 9.6 (6.8–11.8)               | 199.4% (90 to 306%)                 | 96.1 (68.3–118.7)        | -10.9% (-44.2 to 21.4%)             | 0.92                     |
|                  | Kuwait                       | 2.4 (1.7–3)                  | 134.1% (43.7 to 198.9%)             | 64.3 (45.7–80.2)         | -10% (-45.1 to 14.8%)               | 0.65                     |
|                  | Lebanon                      | 5.9 (4.1–7.6)                | 57.1% (5.6 to 115.1%)               | 114.1 (80.2–146.9)       | -10.5% (-39.7 to 21.6%)             | 0.79                     |
|                  | Libya                        | 8.5 (6.2–11.2)               | 70.9% (15.5 to 160.1%)              | 132.5 (97.6–173.2)       | -5% (-32.8 to 36.5%)                | 0.63                     |
|                  | Morocco                      | 19.4 (13–26.8)               | 56.4% (-9.8 to 133.7%)              | 54.6 (36.9–73.8)         | 2.3% (-37.4 to 47.3%)               | 1.39                     |
|                  | Palestine                    | 8.8 (6.8–10.9)               | 113.7% (30.7 to 199.1%)             | 228.8 (173.5–275.6)      | -9.4% (-40.1 to 23.6%)              | 0.82                     |
|                  | Oman                         | 2.5 (1.4–3.2)                | 148% (25.1 to 276.2%)               | 71 (42.8–89.6)           | 9.7% (-45.2 to 63.5%)               | 0.97                     |
|                  | Qatar                        | 1.6 (1.1–2.7)                | 422.6% (204.5 to 702.6%)            | 83.1 (59.5–125.1)        | -21.6% (-53.8 to 18.8%)             | 1.25                     |
|                  | Saudi Arabia                 | 25.8 (18.8–38.9)             | 245.2% (88.5 to 548.5%)             | 77.6 (57.8–117.9)        | 30.4% (-30.5 to 145.4%)             | 0.92                     |
|                  | Syrian Arab Republic         | 20.1 (14.4–27.2)             | 33.6% (-23.6 to 106.3%)             | 142.6 (103–191.1)        | -7.3% (-38.8 to 36.5%)              | 0.83                     |
|                  | Tunisia                      | 5 (3.3–6.8)                  | 42.9% (-16.3 to 111%)               | 41 (27–56)               | -6.3% (-42.7 to 36.2%)              | 1.2                      |
|                  | Türkiye                      | 130.4 (62.3–180.1)           | 23.2% (-35.1 to 91.7%)              | 155.2 (75.2–211.6)       | -21.2% (-55.8 to 17.8%)             | 0.77                     |
|                  | United Arab Emirates         | 14.1 (8.1–21)                | 459.7% (269.5 to 712.1%)            | 149.4 (90.4–203.9)       | -11% (-45.5 to 29.8%)               | 0.8                      |
|                  | Yemen                        | 31.3 (18.6–46)               | 136.6% (23.5 to 365.2%)             | 122.1 (74.2–179.5)       | 15% (-36 to 99.4%)                  | 0.76                     |
| Afghanistan      | 54.1 (28.9–95.3)             | 152.6% (56.9 to 371.5%)      | 174.6 (98.6–321.4)                  | -5.9% (-38.6 to 55.9%)   | 0.81                                |                          |
| Sudan            | 48 (28.8–70.5)               | 69.9% (-20.1 to 292.2%)      | 134.4 (83.4–194.7)                  | -1.7% (-49 to 87.2%)     | 0.69                                |                          |
| Stroke*          | Global                       | 125490.4 (116154.7–134427.9) | 27% (15.3 to 37.8%)                 | 1550 (1434.5–1660.7)     | -38% (-43.7 to -32.9%)              | 0.7                      |
|                  | North Africa and Middle East | 6832.3 (6014.8–7787.8)       | 34.5% (18 to 53.6%)                 | 1586.8 (1407–1782.8)     | -35.1% (-42.5 to -25.9%)            | 0.99                     |
|                  | Algeria                      | 458.9 (365.7–567.4)          | 37.9% (8.1 to 76.4%)                | 1512.6 (1223–1842.1)     | -47.8% (-58.8 to -34%)              | 1.22                     |
|                  | Bahrain                      | 5.9 (4.8–7.5)                | 82.8% (42.3 to 141.6%)              | 767 (633.5–977.6)        | -56.1% (-65 to -45%)                | 1.21                     |
|                  | Egypt                        | 1300.1 (960.6–1749.9)        | -15.4% (-39.9 to 25.9%)             | 1855.4 (1367.5–2533.1)   | -39.7% (-55.1 to -19.7%)            | 1.08                     |
|                  | Iran                         | 736.7 (679.9–781.7)          | 38.6% (23 to 55.4%)                 | 1065.8 (976.7–1134.4)    | -49.2% (-54.5 to -41.4%)            | 0.93                     |
|                  | Iraq                         | 604.5 (471.7–746)            | 112.7% (62.5 to 175.2%)             | 2616.5 (2102.7–3132.9)   | -20.5% (-38.2 to 0%)                | 0.77                     |
|                  | Jordan                       | 65.6 (54.3–78.1)             | 111.1% (67.1 to 162%)               | 1163.5 (954.9–1374.6)    | -54.1% (-63.2 to -43.8%)            | 1.11                     |
|                  | Kuwait                       | 19.2 (15.8–23.1)             | 224.1% (165.5 to 293.9%)            | 749 (616.5–896.1)        | -12.8% (-27.8 to 5.7%)              | 0.58                     |
|                  | Lebanon                      | 27.4 (19.3–35.9)             | 45.3% (2.7 to 96.7%)                | 528.3 (372.5–692.1)      | -42.3% (-59.3 to -21.3%)            | 0.91                     |
|                  | Libya                        | 68.6 (51.2–90.6)             | 39.1% (0.8 to 99.7%)                | 1322.4 (1000.5–1742.3)   | -25.6% (-43.4 to 0.2%)              | 1.13                     |
|                  | Morocco                      | 581.1 (451.5–721.7)          | 66.8% (27.8 to 110.2%)              | 1992.7 (1584.1–2446.6)   | -19.4% (-37.5 to 0.5%)              | 1.01                     |
|                  | Palestine                    | 38.6 (33–43.9)               | 54% (18.4 to 97.9%)                 | 1890.3 (1632.7–2140.5)   | -35% (-49.6 to -16.4%)              | 0.94                     |
|                  | Oman                         | 25.3 (21.8–30.6)             | 13.8% (-13.2 to 53.4%)              | 1647.1 (1439.9–1874.5)   | -41.5% (-55 to -21.9%)              | 0.91                     |
|                  | Qatar                        | 5.9 (4.3–7.9)                | 187.7% (103.6 to 298.9%)            | 722.3 (572.2–941)        | -48.2% (-62 to -31%)                | 1.78                     |
|                  | Saudi Arabia                 | 348.7 (259.5–437.9)          | 116.2% (51.2 to 209.1%)             | 1815.5 (1408.2–2165.5)   | -32.8% (-51 to -7.4%)               | 1.00                     |
|                  | Syrian Arab Republic         | 208.3 (157.6–274)            | -11.7% (-36 to 23.3%)               | 1784 (1385.4–2304.3)     | -42.5% (-58.2 to -20.6%)            | 0.96                     |
|                  | Tunisia                      | 152 (112.9–200.8)            | 73.3% (26.9 to 133.5%)              | 1278.1 (957.8–1669)      | -28.9% (-48 to -4.6%)               | 0.86                     |
|                  | Türkiye                      | 825.1 (660.4–1008.3)         | 70.3% (22.4 to 119.6%)              | 971.3 (778.9–1182.1)     | -25.9% (-46.7 to -4.8%)             | 0.89                     |
|                  | United Arab Emirates         | 76.7 (53–110.4)              | 376.4% (212.6 to 600.9%)            | 1589.3 (1200–2106.9)     | -50.2% (-63.3 to -33.3%)            | 0.94                     |
| Yemen            | 348.7 (262.5–463.4)          | 81.9% (35.4 to 149.9%)       | 2515.8 (1917–3278.3)                | -26.4% (-43.7 to -2.2%)  | 1.04                                |                          |
| Afghanistan      | 466.3 (332.5–617.4)          | 52% (14.2 to 96.2%)          | 3249.7 (2264.5–4235.5)              | -23.2% (-41.6 to -4%)    | 1.42                                |                          |
| Sudan            | 461.8 (329–661)              | 14.7% (-15.3 to 52.6%)       | 2309 (1690.7–3286.2)                | -35.9% (-49.3 to -18.7%) | 1.11                                |                          |
| Ischaemic stroke | Global                       | 50349.7 (46232.4–54066.7)    | 48.1% (32.3 to 61.3%)               | 636.5 (582–683.1)        | -33.4% (-40 to -27.6%)              | 0.73                     |
|                  | North Africa and Middle East | 3874.1 (3427.8–4371.1)       | 112.9% (77.1 to 146.1%)             | 987.9 (880.9–1105.9)     | -11.1% (-23.3 to 1.3%)              | 1.03                     |

**Table S11** Cause- and sex-specific burden, mortality, incidence, and prevalence of neurological conditions in North Africa and Middle East countries

| Measure                   | Cause | Location                     | All Ages                  |                                     | Age-standardised         |                                     | Sex ratio<br>2019<br>F:M |
|---------------------------|-------|------------------------------|---------------------------|-------------------------------------|--------------------------|-------------------------------------|--------------------------|
|                           |       |                              | Number (thousand)<br>2019 | Percent change<br>From 1990 to 2019 | Rate per 100,000<br>2019 | Percent change<br>From 1990 to 2019 |                          |
|                           |       |                              | Mean (95% UI)             | Mean (95% UI)                       | Mean (95% UI)            | Mean (95% UI)                       |                          |
|                           |       | Algeria                      | 302.9 (238–378)           | 121.8% (69.2 to 188%)               | 1071 (848.5–1326.6)      | -27.8% (-43.4 to -9.4%)             | 1.24                     |
|                           |       | Bahrain                      | 2.6 (2.1–3.3)             | 123.7% (71.8 to 193.8%)             | 473.6 (390–608.3)        | -47.7% (-58.7 to -35%)              | 1.21                     |
|                           |       | Egypt                        | 704.1 (521.9–961)         | 86.9% (27.6 to 165.9%)              | 1141.7 (834.6–1566.8)    | 10.8% (-22 to 46%)                  | 1.25                     |
|                           |       | Iran                         | 544 (496.6–578.7)         | 58.8% (39.2 to 79.3%)               | 815.3 (737.4–870.1)      | -46.6% (-52.8 to -38%)              | 0.98                     |
|                           |       | Iraq                         | 312.9 (249.3–376.9)       | 151.1% (90.4 to 223.9%)             | 1579.4 (1289–1862.9)     | -7.1% (-28.1 to 17.2%)              | 0.82                     |
|                           |       | Jordan                       | 43.3 (35.6–51.1)          | 136.7% (84.1 to 191.8%)             | 840.5 (689.2–990.8)      | -50.6% (-61.4 to -39.3%)            | 1.14                     |
|                           |       | Kuwait                       | 10.6 (8.7–12.9)           | 246.8% (184.7 to 326.6%)            | 492.2 (402.7–595.2)      | -13.3% (-28.9 to 5.9%)              | 0.63                     |
|                           |       | Lebanon                      | 21.1 (14.3–27.4)          | 116.3% (46.7 to 187%)               | 407.8 (275.3–528.6)      | -22.7% (-46.2 to 3.1%)              | 0.9                      |
|                           |       | Libya                        | 44.2 (32.7–59.7)          | 152.8% (85.7 to 252.6%)             | 912.8 (682.1–1217.5)     | 9% (-17.8 to 46.7%)                 | 1.13                     |
|                           |       | Morocco                      | 381.4 (298–470.1)         | 172.2% (101.8 to 245.1%)            | 1380.6 (1094.3–1686.2)   | 19.5% (-9.3 to 48%)                 | 1.03                     |
|                           |       | Palestine                    | 26.1 (22.1–29.8)          | 92.3% (46.2 to 150%)                | 1387.8 (1182.5–1583.7)   | -19.8% (-38 to 3.7%)                | 0.97                     |
|                           |       | Oman                         | 13.1 (11–15.5)            | 61.9% (19.4 to 124.2%)              | 1093.5 (932.1–1272.3)    | -20.6% (-39.3 to 8.4%)              | 0.64                     |
|                           |       | Qatar                        | 1.7 (1.3–2.4)             | 199% (99 to 324.1%)                 | 433.9 (344.6–570.4)      | -38.7% (-55.7 to -18%)              | 1.89                     |
|                           |       | Saudi Arabia                 | 163.1 (119.6–201.3)       | 136.7% (62.8 to 229.7%)             | 1078.7 (809.9–1276.7)    | -21.7% (-43 to 4.6%)                | 1.01                     |
|                           |       | Syrian Arab Republic         | 93.7 (70.7–121.9)         | 34.6% (-5 to 89.5%)                 | 887.1 (687–1136.2)       | -27.8% (-49.7 to -0.9%)             | 1.12                     |
|                           |       | Tunisia                      | 106.8 (79.9–140.3)        | 175.1% (94.2 to 273.1%)             | 919.3 (689.9–1202.8)     | 0.9% (-28 to 35.7%)                 | 0.87                     |
|                           |       | Türkiye                      | 424.5 (337.5–520)         | 138.3% (59.8 to 211.6%)             | 516.9 (411.8–632.2)      | -8.6% (-38.7 to 19.9%)              | 0.97                     |
|                           |       | United Arab Emirates         | 40 (27.9–55.1)            | 582.3% (344.3 to 936.2%)            | 1125.8 (857.3–1440)      | -38.6% (-54.7 to -17.6%)            | 0.96                     |
|                           |       | Yemen                        | 181.7 (139.4–241.2)       | 234.9% (150.9 to 360%)              | 1513.8 (1168.7–2002)     | 20.4% (-6.8 to 57.4%)               | 1.06                     |
|                           |       | Afghanistan                  | 195.5 (141.6–268.2)       | 134.5% (74.8 to 207.3%)             | 1675.8 (1191.4–2257.4)   | 28.6% (-2.2 to 64.4%)               | 1.36                     |
|                           |       | Sudan                        | 256.9 (187.2–378)         | 102.5% (50.2 to 167.8%)             | 1465.8 (1081.7–2132.7)   | 6.2% (-16.1 to 35.3%)               | 1.12                     |
| Intracerebral haemorrhage |       | Global                       | 65306.2 (60073.8–70392.3) | 24% (10.4 to 35.4%)                 | 793.4 (731.2–854.6)      | -37.4% (-44.2 to -31.5%)            | 0.66                     |
|                           |       | North Africa and Middle East | 2520 (2171.8–2943.1)      | 0.1% (-15.7 to 18.7%)               | 514 (447.9–593)          | -52.9% (-59.7 to -44.9%)            | 0.91                     |
|                           |       | Algeria                      | 131.1 (101.7–165.7)       | -19.2% (-39.1 to 7.8%)              | 374.3 (293–473.1)        | -69% (-76.8 to -59.3%)              | 1.16                     |
|                           |       | Bahrain                      | 2.6 (2–3.3)               | 67.6% (24.5 to 126.6%)              | 238.4 (192.5–299.8)      | -65.9% (-74 to -55.4%)              | 1.26                     |
|                           |       | Egypt                        | 498.9 (354.5–683.9)       | -38.6% (-58.8 to -8.7%)             | 608 (426.1–849.3)        | -60.8% (-72 to -46%)                | 0.86                     |
|                           |       | Iran                         | 156.2 (147.5–165.4)       | 2% (-11 to 15.5%)                   | 203.3 (190.9–215.2)      | -55.6% (-61.9 to -49.2%)            | 0.76                     |
|                           |       | Iraq                         | 272.1 (207.2–348)         | 97.1% (48 to 165.7%)                | 973.6 (760.3–1219.7)     | -30.5% (-48 to -8.6%)               | 0.68                     |
|                           |       | Jordan                       | 20.1 (16.6–24.1)          | 73.5% (36.2 to 118.7%)              | 294.9 (244.2–353)        | -61.7% (-69.8 to -52%)              | 1.02                     |
|                           |       | Kuwait                       | 7.4 (5.9–9)               | 254.6% (175.8 to 343.4%)            | 220.2 (175.7–269.5)      | -4% (-25.4 to 20.7%)                | 0.44                     |
|                           |       | Lebanon                      | 5.4 (3.8–7.6)             | -27.2% (-50.1 to 4.9%)              | 103.7 (72.5–145.4)       | -67.9% (-77.7 to -53.8%)            | 0.93                     |
|                           |       | Libya                        | 20.7 (15–28.7)            | -6.5% (-34.2 to 39.9%)              | 347.2 (254–476.4)        | -52.7% (-65.3 to -34.7%)            | 1.13                     |
|                           |       | Morocco                      | 170 (126.5–220.3)         | 1.6% (-27.3 to 38.3%)               | 521.4 (392.9–671)        | -52% (-65.3 to -34.6%)              | 0.95                     |
|                           |       | Palestine                    | 11.3 (9.5–13.3)           | 7% (-18.3 to 42.8%)                 | 462 (389.4–544)          | -57.7% (-67.7 to -43.6%)            | 0.84                     |
|                           |       | Oman                         | 9.8 (8.4–12.4)            | -7.1% (-29.6 to 28.1%)              | 473 (407.1–592.1)        | -60.9% (-70.6 to -47.4%)            | 1.9                      |
|                           |       | Qatar                        | 2.8 (2.1–3.9)             | 174.5% (83.4 to 292.8%)             | 215 (165.9–284.7)        | -58.4% (-70.5 to -42.9%)            | 1.59                     |
|                           |       | Saudi Arabia                 | 171.9 (126.8–221.2)       | 106.7% (41 to 213.9%)               | 695.8 (533.8–855.4)      | -43.4% (-60.1 to -16%)              | 0.97                     |
|                           |       | Syrian Arab Republic         | 100.6 (75.7–135.8)        | -13.1% (-38.9 to 24.2%)             | 796.9 (605.4–1057.1)     | -49.2% (-63.8 to -28.7%)            | 0.82                     |
|                           |       | Tunisia                      | 38.2 (27.6–51)            | -1.2% (-31.3 to 40%)                | 303.9 (221.8–403.7)      | -58% (-70.6 to -40%)                | 0.81                     |
|                           |       | Türkiye                      | 320.1 (253.6–397.6)       | 34.2% (-3.3 to 74.6%)               | 364.9 (289.8–451.6)      | -38.3% (-56.1 to -20.1%)            | 0.8                      |
|                           |       | United Arab Emirates         | 31.8 (20.8–50.2)          | 281.6% (130.5 to 495.2%)            | 411.1 (282.8–629.3)      | -65.7% (-77.3 to -50.2%)            | 0.85                     |
|                           |       | Yemen                        | 139.6 (101.6–188.1)       | 23% (-12.1 to 75.9%)                | 847.6 (623.1–1140.1)     | -54.2% (-66.6 to -36.7%)            | 0.99                     |
|                           |       | Afghanistan                  | 231.7 (166.2–313.9)       | 21.1% (-10 to 64.3%)                | 1348.6 (941.2–1813.7)    | -46.5% (-60 to -29.7%)              | 1.46                     |
|                           |       | Sudan                        | 175.2 (115.8–250.4)       | -22.8% (-45.8 to 6.5%)              | 730.2 (488.8–1029)       | -61.5% (-71.1 to -48.6%)            | 1.09                     |
| Subarachnoid haemorrhage  |       | Global                       | 9834.5 (8614.6–11416.4)   | -19.1% (-30.7 to 12.6%)             | 120.1 (105.5–139.2)      | -57% (-63.3 to -39.8%)              | 0.82                     |
|                           |       | North Africa and Middle East | 438.2 (355.9–559.6)       | -41% (-55.3 to 0.5%)                | 84.8 (69.4–107.1)        | -64.9% (-73.3 to -43.4%)            | 1.03                     |
|                           |       | Algeria                      | 24.9 (18.2–34.2)          | -26.7% (-49.3 to 20.6%)             | 67.4 (49.6–90.1)         | -67.1% (-77.2 to -46.7%)            | 1.15                     |

**Table S11** Cause- and sex-specific burden, mortality, incidence, and prevalence of neurological conditions in North Africa and Middle East countries

| Measure                                 |                              | All Ages                  |                          | Age-standardised     |                          | Sex ratio |
|-----------------------------------------|------------------------------|---------------------------|--------------------------|----------------------|--------------------------|-----------|
|                                         |                              | Number (thousand)         | Percent change           | Rate per 100,000     | Percent change           |           |
|                                         |                              | 2019                      | From 1990 to 2019        | 2019                 | From 1990 to 2019        |           |
| Cause                                   | Location                     | Mean (95% UI)             | Mean (95% UI)            | Mean (95% UI)        | Mean (95% UI)            | F:M       |
|                                         | Bahrain                      | 0.7 (0.5–1)               | 37.2% (-6.2 to 119.3%)   | 55 (41.9–77.4)       | -61% (-73 to -43.7%)     | 1.02      |
|                                         | Egypt                        | 97.1 (67.3–138)           | -72% (-84.1 to -33.8%)   | 105.7 (74.2–149.7)   | -78.7% (-86.7 to -53.8%) | 0.82      |
|                                         | Iran                         | 36.6 (32.3–43.6)          | 2.8% (-24.5 to 62.9%)    | 47.2 (41.9–54.8)     | -59% (-71.2 to -34.3%)   | 0.94      |
|                                         | Iraq                         | 19.6 (13.9–27.5)          | -9.4% (-42.4 to 54.8%)   | 63.4 (45.7–89.1)     | -66.5% (-79.1 to -42.8%) | 1.02      |
|                                         | Jordan                       | 2.2 (1.7–2.8)             | 84.9% (27.4 to 189.2%)   | 28.1 (20.8–34.8)     | -57.8% (-71 to -34.1%)   | 1.01      |
|                                         | Kuwait                       | 1.3 (1–1.6)               | 58% (17.6 to 159%)       | 36.6 (29.5–46.1)     | -41% (-55.4 to -13.9%)   | 0.9       |
|                                         | Lebanon                      | 0.9 (0.5–1.3)             | -46.5% (-73.5 to -0.1%)  | 16.8 (9.5–25.3)      | -73.7% (-87.1 to -50.4%) | 1.2       |
|                                         | Libya                        | 3.7 (2.5–5.5)             | -61.8% (-77.8 to -10.3%) | 62.4 (42.4–92.6)     | -69.6% (-80.3 to -45.5%) | 1.16      |
|                                         | Morocco                      | 29.6 (19.4–45.1)          | -27.5% (-51.9 to 25.2%)  | 90.6 (61–134.7)      | -60.6% (-74.2 to -30.8%) | 1.18      |
|                                         | Palestine                    | 1.2 (0.9–1.4)             | 29% (-10.1 to 98.3%)     | 40.6 (33–48.7)       | -51% (-66.6 to -25.4%)   | 1.22      |
|                                         | Oman                         | 2.4 (1.6–4)               | -33.3% (-61.6 to 47.5%)  | 80.6 (51.4–125.1)    | -64.4% (-79 to -30.7%)   | 1.27      |
|                                         | Qatar                        | 1.4 (1–1.8)               | 203.9% (73.8 to 389.9%)  | 73.4 (53.3–97.8)     | -56.9% (-74.6 to -27.3%) | 1.7       |
|                                         | Saudi Arabia                 | 13.7 (9.2–19.2)           | 48% (-17.9 to 162%)      | 41 (28.5–55.1)       | -57% (-76.5 to -24.9%)   | 1.52      |
|                                         | Syrian Arab Republic         | 14 (10.4–17.8)            | -72.3% (-82 to -52.7%)   | 100 (75.4–126)       | -67.5% (-77.7 to -49.3%) | 0.83      |
|                                         | Tunisia                      | 6.9 (4.6–9.8)             | -32% (-58.1 to 19.4%)    | 54.9 (37–77)         | -66.3% (-79.7 to -41.1%) | 1.01      |
|                                         | Türkiye                      | 80.5 (61.6–103.1)         | 18.9% (-27.9 to 116.3%)  | 89.5 (69.3–113.8)    | -41.8% (-64.7 to 8.3%)   | 0.8       |
|                                         | United Arab Emirates         | 5 (2.3–8.9)               | 158.9% (42.8 to 384.3%)  | 52.3 (24.9–85.9)     | -67.3% (-80 to -45.5%)   | 1.35      |
|                                         | Yemen                        | 27.5 (13.5–46)            | 14.3% (-25.3 to 99.8%)   | 154.5 (76.3–264)     | -50.2% (-65.3 to -20.4%) | 1.23      |
|                                         | Afghanistan                  | 39.1 (11.8–68.6)          | 22.2% (-15.8 to 93.1%)   | 225.4 (67.3–391.3)   | -44.6% (-61 to -14.5%)   | 1.6       |
|                                         | Sudan                        | 29.7 (15.6–53)            | -39.2% (-59.5 to 28.9%)  | 113 (60.8–198.4)     | -65.4% (-76.4 to -33.3%) | 1.12      |
| Neurological disorders†*                | Global                       | 32098.4 (18750.1–60829.3) | 81.3% (45 to 114.6%)     | 422.3 (243.2–806.2)  | -7.4% (-16.5 to 2%)      | 0.91      |
|                                         | North Africa and Middle East | 1708.2 (1049.4–3130.8)    | 68.3% (24.8 to 124.2%)   | 447.2 (241.7–897.3)  | -11.5% (-23.1 to 7.1%)   | 0.97      |
|                                         | Algeria                      | 120.5 (65.6–244.8)        | 76.5% (15.8 to 149.8%)   | 436.9 (213.5–944)    | -19.1% (-37.2 to -0.3%)  | 1.06      |
|                                         | Bahrain                      | 2.8 (1.8–5)               | 177.7% (104.4 to 266.1%) | 464.1 (236.7–947.9)  | -14.5% (-29.9 to 1.7%)   | 1.02      |
|                                         | Egypt                        | 198.5 (116–369.3)         | 80.9% (36.9 to 132.9%)   | 405.1 (199.8–823.1)  | -1.6% (-20.5 to 23.9%)   | 1.04      |
|                                         | Iran                         | 270.1 (147.8–532.9)       | 93.5% (24.4 to 184.4%)   | 418.4 (213.6–866.4)  | -11.4% (-24.7 to 14%)    | 0.97      |
|                                         | Iraq                         | 84.1 (50.5–154.9)         | 103% (54 to 160.3%)      | 418.7 (207.7–864.7)  | -5.2% (-22.9 to 15.3%)   | 0.89      |
|                                         | Jordan                       | 20.4 (12.1–39)            | 234.3% (153 to 323.6%)   | 384 (185–824.8)      | -12.8% (-28.2 to 7.1%)   | 1.00      |
|                                         | Kuwait                       | 8.1 (4.3–16.1)            | 165.2% (85.4 to 248.6%)  | 378.8 (172.1–818.2)  | -15.4% (-30.9 to -2.5%)  | 0.94      |
|                                         | Lebanon                      | 21.1 (10.3–46)            | 130.7% (67.3 to 224.2%)  | 417.9 (201.9–909.6)  | -9.8% (-26.4 to 24.9%)   | 0.96      |
|                                         | Libya                        | 21.9 (11.9–42.8)          | 102% (46.8 to 168.6%)    | 473.7 (234.6–985.4)  | -4.9% (-24.5 to 21%)     | 0.97      |
|                                         | Morocco                      | 108.6 (55.9–219.9)        | 107.6% (62.2 to 147%)    | 430.1 (205.5–908.5)  | 3.7% (-13.6 to 22%)      | 0.93      |
|                                         | Palestine                    | 10.4 (7.2–18.4)           | 78.8% (37.8 to 135.8%)   | 460.6 (252.7–984.1)  | -12.5% (-30.3 to 10.9%)  | 0.87      |
|                                         | Oman                         | 5 (3.1–9.4)               | 118.9% (77.3 to 181.2%)  | 462.8 (225.9–999.7)  | 1.4% (-15.7 to 39.5%)    | 0.93      |
|                                         | Qatar                        | 2.4 (1.6–4.1)             | 370.4% (237.2 to 547.8%) | 482.8 (243.5–1022.1) | 0.2% (-21.4 to 25.4%)    | 1.16      |
|                                         | Saudi Arabia                 | 72.2 (48.1–118.9)         | 115% (55.8 to 200.1%)    | 479.1 (260.8–954.7)  | -5.6% (-25.5 to 29.5%)   | 0.91      |
|                                         | Syrian Arab Republic         | 36.7 (18.4–76.7)          | 62% (10.4 to 128.3%)     | 410.7 (188.7–907.5)  | 0.5% (-23.9 to 36.2%)    | 1.01      |
|                                         | Tunisia                      | 45.1 (21–96.2)            | 103.5% (31.5 to 186.1%)  | 416.5 (189.5–892.1)  | -9.4% (-31.7 to 20.7%)   | 0.94      |
|                                         | Türkiye                      | 398.2 (225.2–780.4)       | 30.7% (-14.4 to 93.1%)   | 511 (293.3–978.2)    | -22.8% (-39.9 to -2%)    | 0.94      |
|                                         | United Arab Emirates         | 20.3 (13.6–29.8)          | 482.3% (297.7 to 728.9%) | 515.1 (295.4–990.3)  | -9.1% (-27.7 to 15.9%)   | 0.81      |
|                                         | Yemen                        | 59.9 (37.2–106.7)         | 79% (15.7 to 196.2%)     | 437 (215.1–925.6)    | -5.7% (-25.8 to 23%)     | 0.96      |
|                                         | Afghanistan                  | 103.1 (67–153.5)          | 61% (24.8 to 135.6%)     | 606.2 (341.8–1162.2) | -19.5% (-37.6 to 2.3%)   | 1.01      |
|                                         | Sudan                        | 96.8 (60.9–163.2)         | 21.2% (-24.2 to 109.6%)  | 451 (240.8–919.7)    | -19% (-40.9 to 5.1%)     | 0.87      |
| Alzheimer's disease and other dementias | Global                       | 17859.9 (4374.6–47064.8)  | 160.3% (145.7 to 181.7%) | 239.8 (58.5–627.2)   | 2.9% (-1.5 to 9.8%)      | 1.15      |
|                                         | North Africa and Middle East | 855.9 (207.4–2304.9)      | 173.2% (151.8 to 232.1%) | 274.2 (67.3–727.7)   | -2.6% (-9.7 to 17.2%)    | 1.13      |
|                                         | Algeria                      | 68.2 (16.7–189.7)         | 223.2% (150.9 to 312.3%) | 288.2 (70.3–791.7)   | -7.2% (-23.2 to 12.4%)   | 1.14      |
|                                         | Bahrain                      | 1.2 (0.3–3.4)             | 382.8% (289.1 to 512.1%) | 289.4 (70.1–764.3)   | -6.2% (-20.9 to 12.1%)   | 1.15      |

**Table S11** Cause- and sex-specific burden, mortality, incidence, and prevalence of neurological conditions in North Africa and Middle East countries

| Measure             | Cause | Location                     | All Ages                  |                                     | Age-standardised         |                                     | Sex ratio<br>2019<br>F:M |
|---------------------|-------|------------------------------|---------------------------|-------------------------------------|--------------------------|-------------------------------------|--------------------------|
|                     |       |                              | Number (thousand)<br>2019 | Percent change<br>From 1990 to 2019 | Rate per 100,000<br>2019 | Percent change<br>From 1990 to 2019 |                          |
|                     |       |                              | Mean (95% UI)             | Mean (95% UI)                       | Mean (95% UI)            | Mean (95% UI)                       |                          |
|                     |       | Egypt                        | 94.4 (21.9–259.4)         | 109.5% (67.1 to 173.8%)             | 252.4 (56.8–672.4)       | -1.7% (-19.3 to 25.3%)              | 1.16                     |
|                     |       | Iran                         | 160.8 (38.2–426.3)        | 309.6% (265.3 to 447.6%)            | 272.1 (66.1–723)         | -0.9% (-7.7 to 32%)                 | 1.12                     |
|                     |       | Iraq                         | 40.9 (9.7–107.6)          | 153.1% (109.1 to 209.2%)            | 271.4 (64.8–723.4)       | 0.3% (-16 to 21.3%)                 | 1.07                     |
|                     |       | Jordan                       | 10.3 (2.5–28.6)           | 367.9% (287.4 to 478.3%)            | 258.1 (63–715.8)         | -7.7% (-22.3 to 14.6%)              | 1.13                     |
|                     |       | Kuwait                       | 4.8 (1.2–12.6)            | 379.4% (320.7 to 456.3%)            | 271 (67.9–731)           | -3.9% (-15.3 to 10%)                | 1.1                      |
|                     |       | Lebanon                      | 14 (3.3–38.8)             | 201.8% (146.8 to 347.3%)            | 281.8 (67.2–770.7)       | -4.4% (-20.7 to 40.6%)              | 1.18                     |
|                     |       | Libya                        | 12.2 (3–33.4)             | 159.2% (106.9 to 231.1%)            | 305.3 (74.8–829.1)       | -5% (-23.6 to 21.6%)                | 1.12                     |
|                     |       | Morocco                      | 61.5 (13.9–170.8)         | 147.5% (105.1 to 196.1%)            | 274.9 (62.5–760.6)       | 0.5% (-15.5 to 18.8%)               | 1.03                     |
|                     |       | Palestine                    | 4.1 (1–11.9)              | 111.9% (74 to 165.2%)               | 276.4 (63.8–791.3)       | -6.6% (-22.5 to 16.2%)              | 1.05                     |
|                     |       | Oman                         | 2.4 (0.6–6.7)             | 121.4% (82.1 to 204.3%)             | 308.6 (71–852.2)         | -4.7% (-21.2 to 39.9%)              | 1.14                     |
|                     |       | Qatar                        | 0.9 (0.2–2.5)             | 586.4% (396.5 to 851.4%)            | 296.7 (70.2–820.8)       | 3.7% (-16.9 to 28.2%)               | 1.15                     |
|                     |       | Saudi Arabia                 | 23.4 (5.6–63.7)           | 120.5% (73.4 to 215.2%)             | 280.3 (67–747.3)         | -3.2% (-21.1 to 39.5%)              | 1.1                      |
|                     |       | Syrian Arab Republic         | 21.9 (4.8–61.9)           | 113% (60.9 to 198.9%)               | 280.2 (65.9–791)         | 4% (-19.1 to 47.9%)                 | 1.16                     |
|                     |       | Tunisia                      | 29.9 (7.1–79.8)           | 208.9% (135.9 to 338.8%)            | 285.2 (67–745.2)         | -3.3% (-25 to 34.3%)                | 1.09                     |
|                     |       | Türkiye                      | 220.9 (55.7–628.9)        | 175.4% (126 to 237.4%)              | 278.5 (70.2–786.3)       | -4.3% (-21.4 to 16.6%)              | 1.19                     |
|                     |       | United Arab Emirates         | 3.1 (0.7–8.9)             | 606.8% (406.4 to 889.8%)            | 262.4 (62.9–724.5)       | -7.2% (-22.3 to 25.2%)              | 1.08                     |
|                     |       | Yemen                        | 22.7 (5.2–64.6)           | 204.8% (151 to 283.8%)              | 274.5 (63.9–761.5)       | 0.5% (-15.7 to 23.6%)               | 1.07                     |
|                     |       | Afghanistan                  | 23.4 (5.5–64.8)           | 52% (22.7 to 79.9%)                 | 328.9 (79.5–892.5)       | -4.1% (-20.5 to 10.9%)              | 1.04                     |
|                     |       | Sudan                        | 33.9 (7.8–93.2)           | 105.1% (77.7 to 146.5%)             | 257 (59.6–730.3)         | -5.5% (-17.2 to 11.7%)              | 1.07                     |
| Parkinson's disease |       | Global                       | 5082.5 (4673.4–5409.9)    | 123.5% (105.6 to 139.9%)            | 64.9 (59.6–69.2)         | -0.3% (-7.9 to 6.5%)                | 0.54                     |
|                     |       | North Africa and Middle East | 256.2 (225.1–319.5)       | 158.7% (125.3 to 202.8%)            | 72.7 (63.9–91.5)         | -1% (-13.1 to 15.8%)                | 0.67                     |
|                     |       | Algeria                      | 18.3 (14.4–22.7)          | 153.4% (90.7 to 234.1%)             | 67.5 (53.3–83.2)         | -21.4% (-39.6 to 2.4%)              | 0.84                     |
|                     |       | Bahrain                      | 0.4 (0.2–0.5)             | 266.9% (169.3 to 389.4%)            | 75.5 (52.4–93.7)         | -16.7% (-37.1 to 7.3%)              | 0.69                     |
|                     |       | Egypt                        | 42 (31.6–61.9)            | 133.4% (80.9 to 196%)               | 86.6 (65.3–130.4)        | 11.1% (-12.2 to 39.4%)              | 1.09                     |
|                     |       | Iran                         | 40.7 (34.6–44.9)          | 253% (199.1 to 325.2%)              | 64.8 (55.1–71.4)         | 1.4% (-17.1 to 21.9%)               | 0.67                     |
|                     |       | Iraq                         | 12.9 (10.3–18.5)          | 210.7% (139.7 to 303.4%)            | 75.1 (60.6–104.5)        | 19.2% (-7.3 to 53.8%)               | 0.4                      |
|                     |       | Jordan                       | 2.9 (2.5–3.5)             | 321.2% (232.5 to 428.2%)            | 63.3 (52.9–75.2)         | -16.4% (-33.5 to 4.8%)              | 0.67                     |
|                     |       | Kuwait                       | 0.8 (0.7–1)               | 202.2% (154.4 to 263%)              | 46 (37.5–55.1)           | -29.8% (-40.8 to -16.3%)            | 0.44                     |
|                     |       | Lebanon                      | 3.1 (2.5–4.2)             | 135.7% (69.9 to 219.5%)             | 58.7 (46.9–79.9)         | -17.4% (-40.2 to 11.5%)             | 0.56                     |
|                     |       | Libya                        | 3.2 (2.3–4.2)             | 206.1% (123.4 to 324.3%)            | 73 (53.5–95.8)           | 10.7% (-18.9 to 51.8%)              | 0.68                     |
|                     |       | Morocco                      | 22.3 (17.7–26.3)          | 228.2% (160.1 to 323.9%)            | 86.1 (69–100.3)          | 42.6% (14 to 83.9%)                 | 0.58                     |
|                     |       | Palestine                    | 1.4 (0.9–1.6)             | 123.3% (67.5 to 219.4%)             | 82.1 (54.5–95.3)         | -5.7% (-29.1 to 33.6%)              | 0.55                     |
|                     |       | Oman                         | 0.9 (0.6–1)               | 160.2% (84 to 258.2%)               | 109.7 (65–128.8)         | 30.8% (-5.2 to 77%)                 | 0.5                      |
|                     |       | Qatar                        | 0.4 (0.3–0.5)             | 463.5% (290.7 to 692.3%)            | 132.3 (80.5–177.6)       | 14.4% (-14.8 to 53.3%)              | 1.05                     |
|                     |       | Saudi Arabia                 | 9.7 (7.6–11.5)            | 133% (72.6 to 247.2%)               | 96.2 (69.4–113.5)        | -1.5% (-25 to 46.7%)                | 0.37                     |
|                     |       | Syrian Arab Republic         | 6.6 (4.3–8.6)             | 157.3% (86.7 to 255.3%)             | 72.5 (47.6–93.1)         | 14.2% (-15.7 to 56.3%)              | 0.66                     |
|                     |       | Tunisia                      | 6.9 (5.1–9.4)             | 206.4% (125 to 308.2%)              | 61.4 (44.9–82.7)         | 10.6% (-18.1 to 45.8%)              | 0.55                     |
|                     |       | Türkiye                      | 51.9 (39.3–96.4)          | 136.8% (82.2 to 201%)               | 63.8 (48.4–119.1)        | -12.3% (-31.8 to 10.9%)             | 0.67                     |
|                     |       | United Arab Emirates         | 2.4 (1.6–3.4)             | 687.2% (456.3 to 1074.3%)           | 114.3 (70.7–151)         | -13% (-33.7 to 23.8%)               | 0.59                     |
|                     |       | Yemen                        | 7.1 (5.5–9.7)             | 218.6% (142.5 to 341.6%)            | 67.7 (52.8–89.4)         | 16.4% (-9.6 to 55.9%)               | 0.64                     |
|                     |       | Afghanistan                  | 10.5 (7.8–13.7)           | 51.5% (14.8 to 96.2%)               | 104.2 (79.3–133.3)       | -6.2% (-27.4 to 18.8%)              | 0.74                     |
|                     |       | Sudan                        | 11.6 (8.8–15.1)           | 79.3% (32.6 to 148%)                | 75.6 (58.5–96.3)         | -5% (-29.6 to 30.5%)                | 0.57                     |
| Idiopathic epilepsy |       | Global                       | 5336.8 (4722.7–6170)      | -9.5% (-24.1 to 27.5%)              | 69.5 (61.7–80.6)         | -33.6% (-44 to -7.6%)               | 0.71                     |
|                     |       | North Africa and Middle East | 352.2 (279.1–412.5)       | -18.1% (-37.2 to 39%)               | 57.3 (45.6–67.2)         | -44.4% (-55.6 to -11.7%)            | 0.89                     |
|                     |       | Algeria                      | 21.8 (16.7–27.2)          | -33.4% (-53.1 to 9%)                | 51.6 (39.6–64.2)         | -54.4% (-67.1 to -27.6%)            | 1.05                     |
|                     |       | Bahrain                      | 0.8 (0.6–1)               | 65% (28.5 to 120.6%)                | 61.4 (49.5–77.6)         | -39.1% (-52 to -18.5%)              | 0.98                     |
|                     |       | Egypt                        | 24.4 (16–36.7)            | -8.4% (-35.4 to 47.7%)              | 24 (16.1–35.9)           | -42.9% (-59 to -10.4%)              | 0.62                     |
|                     |       | Iran                         | 33.4 (30.1–39.3)          | -53.1% (-65.8 to -19.2%)            | 40.2 (36–47.4)           | -59% (-69.4 to -34.5%)              | 0.77                     |



**Table S11** Cause- and sex-specific burden, mortality, incidence, and prevalence of neurological conditions in North Africa and Middle East countries

| Measure              |                              | All Ages                |                            | Age-standardised        |                          | Sex ratio |
|----------------------|------------------------------|-------------------------|----------------------------|-------------------------|--------------------------|-----------|
|                      |                              | Number (thousand)       | Percent change             | Rate per 100,000        | Percent change           |           |
|                      |                              | 2019                    | From 1990 to 2019          | 2019                    | From 1990 to 2019        |           |
| Cause                | Location                     | Mean (95% UI)           | Mean (95% UI)              | Mean (95% UI)           | Mean (95% UI)            | F:M       |
|                      | Iraq                         | 16.6 (12.4–21.7)        | 10.7% (-22.1 to 78.1%)     | 38.7 (29.1–50.1)        | -49.1% (-63.3 to -22.8%) | 0.98      |
|                      | Jordan                       | 3.7 (2.8–4.5)           | 85.1% (36.2 to 165.2%)     | 30.9 (23.6–37.7)        | -40.4% (-55.1 to -15%)   | 0.89      |
|                      | Kuwait                       | 1.5 (1.2–1.8)           | 38.3% (14.1 to 78.1%)      | 35.5 (29.4–43.8)        | -37.1% (-47.8 to -20.3%) | 0.88      |
|                      | Lebanon                      | 2.1 (1.5–3)             | -7.7% (-34.7 to 38.7%)     | 41.5 (29.8–57.5)        | -39.6% (-56.7 to -9.9%)  | 0.76      |
|                      | Libya                        | 3.8 (2.8–5.1)           | -5.7% (-33.4 to 41.7%)     | 55.4 (39.9–75.2)        | -32.9% (-50.9 to -3.5%)  | 0.86      |
|                      | Morocco                      | 14.2 (5–37.8)           | -5.2% (-40 to 50.5%)       | 39.2 (13.8–104.9)       | -30.8% (-54.5 to 4.4%)   | 1.42      |
|                      | Palestine                    | 3.5 (3–4.3)             | 36.1% (-0.9 to 123%)       | 71.6 (60.9–86.9)        | -36.9% (-52.6 to -3.6%)  | 0.78      |
|                      | Oman                         | 0.7 (0.5–0.9)           | 29.1% (-13.6 to 138.5%)    | 15 (12.4–19.6)          | -43.2% (-60.6 to -5.2%)  | 0.77      |
|                      | Qatar                        | 0.6 (0.5–0.8)           | 237% (146.6 to 406.7%)     | 22.6 (17.5–30)          | -45.8% (-59.9 to -19.9%) | 1.56      |
|                      | Saudi Arabia                 | 29.8 (21.7–41.7)        | 108.2% (24 to 251.9%)      | 73.8 (55.9–100.8)       | -19.6% (-51.6 to 32.3%)  | 1.18      |
|                      | Syrian Arab Republic         | 4.2 (3.2–5.7)           | -25.6% (-49.9 to 35.1%)    | 29.3 (22.2–39)          | -37.3% (-56.7 to 10.3%)  | 0.82      |
|                      | Tunisia                      | 4.7 (3.3–6.5)           | -42.6% (-62.6 to -8.6%)    | 41.2 (28.8–57.6)        | -50.9% (-67.6 to -23.8%) | 0.79      |
|                      | Türkiye                      | 60.6 (50.2–72.8)        | -48.2% (-64.1 to 6.5%)     | 82.5 (67.7–98.8)        | -51.1% (-66.2 to -1.7%)  | 0.75      |
|                      | United Arab Emirates         | 7 (4.3–10.9)            | 257.4% (124.3 to 474.8%)   | 64.2 (41.6–96.7)        | -36.9% (-57.1 to -3.7%)  | 0.69      |
|                      | Yemen                        | 23.8 (15.4–33.8)        | 12.4% (-28.4 to 172.2%)    | 71.1 (46.5–100.1)       | -36.9% (-58.2 to 23.2%)  | 0.92      |
| Afghanistan          | 56.2 (28.5–79.5)             | 52.8% (5.4 to 208.8%)   | 132.6 (65.9–185.9)         | -48.4% (-61.9 to -8.1%) | 1.17                     |           |
| Sudan                | 38.4 (24.1–53.5)             | -24.7% (-56 to 107.4%)  | 84.4 (54.1–116.2)          | -52.9% (-71.8 to 6%)    | 0.77                     |           |
| Multiple sclerosis   | Global                       | 708.6 (645.1–897.8)     | 53.2% (35.6 to 73.7%)      | 8.5 (7.7–10.7)          | -17.4% (-27.9 to -7.6%)  | 1.38      |
|                      | North Africa and Middle East | 58.2 (45.2–80.4)        | 126.5% (55.9 to 238%)      | 9.9 (7.8–13.6)          | 1.8% (-27.9 to 52.7%)    | 1.34      |
|                      | Algeria                      | 4 (2–5.8)               | 144.3% (39.6 to 288%)      | 9.3 (4.6–13.5)          | 0.1% (-42.7 to 55.6%)    | 1.6       |
|                      | Bahrain                      | 0.1 (0–0.1)             | 412.5% (190.6 to 618.1%)   | 4.1 (2.5–5.5)           | -7.1% (-44.4 to 28%)     | 1.51      |
|                      | Egypt                        | 9.5 (4.4–30)            | 73.8% (-47.9 to 495.6%)    | 9.7 (4.7–26.4)          | -1.1% (-64.7 to 191.7%)  | 1.4       |
|                      | Iran                         | 14.9 (12.3–22)          | 152.2% (86.7 to 244.2%)    | 16.2 (13.4–23.5)        | 5.1% (-26.7 to 48.4%)    | 1.12      |
|                      | Iraq                         | 1.6 (1.1–2.3)           | 219.6% (103.3 to 437.3%)   | 4.7 (3.2–6.7)           | 0.8% (-35.9 to 66.6%)    | 1.17      |
|                      | Jordan                       | 0.7 (0.4–0.9)           | 297% (146 to 459%)         | 6.9 (4.3–8.9)           | -15.7% (-45.8 to 17.1%)  | 1.71      |
|                      | Kuwait                       | 0.2 (0.1–0.3)           | 282.6% (188.1 to 408.8%)   | 3.9 (2.9–5.5)           | -1.4% (-26.3 to 31.7%)   | 1.12      |
|                      | Lebanon                      | 0.5 (0.3–0.8)           | 116% (38.7 to 240.2%)      | 9.9 (5.1–14.5)          | 7.4% (-32 to 68.3%)      | 1.3       |
|                      | Libya                        | 0.8 (0.4–1.4)           | 276.4% (125.3 to 571%)     | 11.3 (5.5–19)           | 39.3% (-20 to 143.8%)    | 1.33      |
|                      | Morocco                      | 3.6 (1.8–5.7)           | 151.9% (53.5 to 315.9%)    | 9.7 (4.9–15.2)          | 26.3% (-22 to 105.7%)    | 1.54      |
|                      | Palestine                    | 0.3 (0.3–0.5)           | 216.9% (81.8 to 464.4%)    | 9 (6.9–12.8)            | 0% (-39.5 to 73.8%)      | 1.00      |
|                      | Oman                         | 0.3 (0.2–0.5)           | 258.7% (74.9 to 559.7%)    | 8.2 (3.9–13.5)          | 10.8% (-46.2 to 103.4%)  | 1.33      |
|                      | Qatar                        | 0.1 (0.1–0.1)           | 594.9% (327.6 to 922.8%)   | 2.7 (1.9–3.7)           | -18.7% (-49.7 to 21.5%)  | 1.5       |
|                      | Saudi Arabia                 | 1.7 (1.2–2.6)           | 365.1% (151.5 to 1122.9%)  | 4.3 (3–6.2)             | 19.2% (-34.5 to 205.4%)  | 1.13      |
|                      | Syrian Arab Republic         | 0.6 (0.4–0.9)           | 104.2% (23 to 241.6%)      | 4.4 (3–6)               | 1.1% (-37.4 to 69.5%)    | 1.31      |
|                      | Tunisia                      | 1.3 (0.6–1.9)           | 150.6% (52.4 to 321.6%)    | 9.5 (4.8–14.4)          | 23.7% (-25.4 to 102.9%)  | 1.42      |
|                      | Türkiye                      | 7.7 (5.5–11.2)          | 30.3% (-42.8 to 137.8%)    | 8.5 (5.9–13.9)          | -27% (-62.8 to 40.7%)    | 1.61      |
|                      | United Arab Emirates         | 2 (0.9–3.6)             | 1081.6% (551.8 to 1757.5%) | 14.3 (6–26.2)           | 31% (-26.2 to 94.8%)     | 1.01      |
| Yemen                | 1.7 (0.8–3.1)                | 281.2% (93.8 to 661.2%) | 7.9 (3.8–12.8)             | 30.5% (-29.5 to 133.4%) | 1.16                     |           |
| Afghanistan          | 4 (1.4–9.8)                  | 224.7% (96.9 to 486.4%) | 16.3 (6.7–36.8)            | 6.8% (-31.4 to 74.9%)   | 1.81                     |           |
| Sudan                | 2.4 (1.4–4.1)                | 175.4% (41.8 to 425.8%) | 7.9 (3.5–12.6)             | 18.8% (-35.9 to 113.6%) | 1.15                     |           |
| Motor neuron disease | Global                       | 977.5 (926.3–1025.4)    | 65.5% (54.5 to 78.2%)      | 11.9 (11.3–12.5)        | -4.9% (-10.7 to 1.9%)    | 0.71      |
|                      | North Africa and Middle East | 38.3 (30.6–47.1)        | 18.4% (-32.8 to 87.7%)     | 7.3 (5.8–9)             | -17.8% (-47.1 to 19.1%)  | 0.72      |
|                      | Algeria                      | 0.8 (0.6–1.1)           | 123.9% (53.5 to 228.4%)    | 2 (1.5–2.7)             | -3% (-34.5 to 46.4%)     | 1.23      |
|                      | Bahrain                      | <0.1 (<0.1–<0.1)        | 86% (35.2 to 150.7%)       | 1.5 (1.2–1.8)           | -62.5% (-71.9 to -50.5%) | 1.24      |
|                      | Egypt                        | 6 (3.3–9.6)             | 237.5% (78.8 to 465.4%)    | 7.5 (4.1–11.9)          | 76.4% (-5.4 to 195.5%)   | 0.67      |
|                      | Iran                         | 3.3 (2.9–3.8)           | 191.4% (89.1 to 307.9%)    | 4.1 (3.6–4.7)           | 51.5% (0.1 to 113.1%)    | 0.9       |
|                      | Iraq                         | 0.4 (0.3–0.6)           | 197.8% (78.6 to 360.2%)    | 1.3 (0.9–1.8)           | 14.2% (-35.6 to 91%)     | 1.2       |
|                      | Jordan                       | 0.3 (0.2–0.4)           | 493.6% (282.5 to 804.1%)   | 2.6 (2–3.6)             | 45.7% (-6.6 to 129.7%)   | 0.47      |
|                      | Kuwait                       | 0.2 (0.1–0.2)           | -23.4% (-47.6 to 7.8%)     | 5.3 (3.7–6.8)           | -64.4% (-75.2 to -50.4%) | 0.33      |

**Table S11** Cause- and sex-specific burden, mortality, incidence, and prevalence of neurological conditions in North Africa and Middle East countries

| Measure                      | Cause | Location                     | All Ages                  |                                     | Age-standardised         |                                     | Sex ratio<br>2019<br>F:M |
|------------------------------|-------|------------------------------|---------------------------|-------------------------------------|--------------------------|-------------------------------------|--------------------------|
|                              |       |                              | Number (thousand)<br>2019 | Percent change<br>From 1990 to 2019 | Rate per 100,000<br>2019 | Percent change<br>From 1990 to 2019 |                          |
|                              |       |                              | Mean (95% UI)             | Mean (95% UI)                       | Mean (95% UI)            | Mean (95% UI)                       |                          |
|                              |       | Lebanon                      | 0.1 (0.1–0.2)             | 96.5% (12.6 to 215.5%)              | 2.7 (1.6–4.4)            | 4.9% (-40.2 to 68.1%)               | 0.85                     |
|                              |       | Libya                        | 0.2 (0.1–0.3)             | 260% (70.3 to 566.3%)               | 3.2 (1.8–4.9)            | 50.1% (-29.3 to 183.3%)             | 1.03                     |
|                              |       | Morocco                      | 0.7 (0.5–1)               | 158.1% (67.8 to 277.2%)             | 2 (1.4–2.7)              | 30.1% (-17.5 to 90.3%)              | 1.13                     |
|                              |       | Palestine                    | 0.1 (0–0.1)               | 239% (117.3 to 435.5%)              | 1.5 (1.2–1.9)            | 45.5% (-11.5 to 143.9%)             | 1.72                     |
|                              |       | Oman                         | 0.1 (0–0.1)               | 218.5% (67.6 to 419.9%)             | 2.7 (1.4–3.9)            | 20.7% (-36.9 to 109.9%)             | 1.39                     |
|                              |       | Qatar                        | <0.1 (<0.1–<0.1)          | 612.3% (342.6 to 1009.8%)           | 1.5 (1.1–2.1)            | -7.9% (-45.3 to 50.3%)              | 1.45                     |
|                              |       | Saudi Arabia                 | 0.7 (0.5–1.1)             | 247.2% (68.1 to 594.8%)             | 2.6 (1.8–3.7)            | 22.5% (-40.3 to 166.4%)             | 0.89                     |
|                              |       | Syrian Arab Republic         | 0.3 (0.2–0.6)             | 138.8% (32.1 to 304.8%)             | 2.3 (1.4–3.8)            | 31.1% (-26.3 to 121.1%)             | 0.87                     |
|                              |       | Tunisia                      | 0.3 (0.2–0.4)             | 135.3% (34.9 to 295.4%)             | 2.1 (1.4–3)              | 19.7% (-31.3 to 104%)               | 0.88                     |
|                              |       | Türkiye                      | 22.9 (18–28.8)            | -15.7% (-55.2 to 50.7%)             | 31 (23.8–39.6)           | -25.6% (-58.5 to 21.2%)             | 0.62                     |
|                              |       | United Arab Emirates         | 0.5 (0.2–1)               | 1091.1% (375.2 to 2343.4%)          | 5.3 (2–10.6)             | 24.9% (-47.6 to 142.8%)             | 0.99                     |
|                              |       | Yemen                        | 0.3 (0.2–0.4)             | 214.8% (96.5 to 413.9%)             | 1.4 (1–2.1)              | 26.1% (-27.5 to 120.6%)             | 1.18                     |
|                              |       | Afghanistan                  | 0.5 (0.4–0.7)             | 126.7% (53.4 to 236.3%)             | 2.2 (1.5–3.2)            | -8.2% (-39.2 to 41.1%)              | 1.34                     |
|                              |       | Sudan                        | 0.5 (0.3–0.7)             | 143.8% (50.9 to 286.3%)             | 1.7 (1.1–2.5)            | 20.5% (-28 to 97.1%)                | 1.14                     |
| Other neurological disorders |       | Global                       | 2133 (1915.2–2381.1)      | 31.4% (16.2 to 49.6%)               | 27.7 (24.7–31)           | -8.9% (-19.1 to 3.5%)               | 0.72                     |
|                              |       | North Africa and Middle East | 147.4 (127.9–171.8)       | 28.8% (-3.1 to 67.3%)               | 25.7 (22.4–29.9)         | -9.5% (-30 to 15.6%)                | 0.61                     |
|                              |       | Algeria                      | 7.4 (6.2–8.9)             | 43.2% (-7.6 to 100.8%)              | 18.3 (15.2–21.7)         | -5.3% (-35.7 to 28.1%)              | 0.72                     |
|                              |       | Bahrain                      | 0.4 (0.3–0.4)             | 122.4% (70.4 to 191.1%)             | 32.2 (26.9–38.3)         | -6.8% (-26.3 to 19.5%)              | 0.84                     |
|                              |       | Egypt                        | 22.2 (15–31.6)            | 73.1% (17 to 150.5%)                | 24.8 (16.8–35.2)         | 19.9% (-17.1 to 65.9%)              | 0.39                     |
|                              |       | Iran                         | 16.9 (15.7–18.2)          | 61.1% (18.9 to 116.6%)              | 21.1 (19.4–22.6)         | 20.8% (-8.5 to 62.8%)               | 0.66                     |
|                              |       | Iraq                         | 11.8 (9–14.9)             | 113.1% (48.2 to 236.7%)             | 27.5 (21.2–34.5)         | 6% (-24.3 to 66.1%)                 | 1.02                     |
|                              |       | Jordan                       | 2.5 (2.1–3.1)             | 150.6% (78.6 to 250.6%)             | 22.1 (18–27.1)           | -4.5% (-29.8 to 29.7%)              | 0.74                     |
|                              |       | Kuwait                       | 0.6 (0.5–0.8)             | 41.3% (4.8 to 85.4%)                | 17.1 (13.7–21.3)         | -31.5% (-48.1 to -10.8%)            | 0.66                     |
|                              |       | Lebanon                      | 1.2 (0.9–1.6)             | 115.2% (50 to 201.4%)               | 23.4 (16.9–31.7)         | 37.4% (-3.3 to 90.7%)               | 0.4                      |
|                              |       | Libya                        | 1.7 (1.3–2.2)             | 109.8% (36 to 234.8%)               | 25.6 (19.3–33.1)         | 39.9% (-6.8 to 117.6%)              | 0.54                     |
|                              |       | Morocco                      | 6.3 (4.6–8.6)             | 58.9% (12.2 to 128.7%)              | 18.2 (13.1–24.5)         | 21.5% (-12.2 to 69.2%)              | 0.56                     |
|                              |       | Palestine                    | 1 (0.8–1.2)               | 79.5% (13.7 to 211.1%)              | 20 (16.6–23.7)           | -0.7% (-33.2 to 67.7%)              | 0.57                     |
|                              |       | Oman                         | 0.7 (0.5–0.8)             | 171.9% (63.8 to 318.8%)             | 18.7 (15–22.9)           | 45.4% (-9.7 to 120.5%)              | 0.97                     |
|                              |       | Qatar                        | 0.5 (0.4–0.6)             | 273.2% (153.8 to 481.7%)            | 27 (20.7–35.8)           | -18.7% (-43.7 to 23.2%)             | 1.57                     |
|                              |       | Saudi Arabia                 | 6.8 (5.2–9)               | 74.6% (5.7 to 198.8%)               | 22 (17.5–27.6)           | -3.2% (-39.1 to 61.5%)              | 1.07                     |
|                              |       | Syrian Arab Republic         | 3 (2.3–4)                 | -17.4% (-46.6 to 33.4%)             | 22 (16.8–28.7)           | -4.7% (-35 to 50.1%)                | 0.89                     |
|                              |       | Tunisia                      | 2 (1.4–2.7)               | 40% (-9.2 to 106.1%)                | 17.1 (12.3–23.3)         | 8.7% (-28.7 to 55.2%)               | 0.56                     |
|                              |       | Türkiye                      | 34.2 (27.9–41.9)          | -34.8% (-54.1 to -5.4%)             | 46.7 (38.8–56.7)         | -38.7% (-56.1 to -12.2%)            | 0.64                     |
|                              |       | United Arab Emirates         | 5.3 (3.2–8)               | 836.4% (460 to 1357.3%)             | 54.5 (33.9–79.3)         | 52.7% (-2.2 to 120.7%)              | 0.33                     |
|                              |       | Yemen                        | 4.2 (2.8–6.1)             | 106% (15.6 to 271.1%)               | 14.4 (10.1–20.4)         | 19% (-25.5 to 104.8%)               | 0.73                     |
|                              |       | Afghanistan                  | 8.4 (5.9–11.7)            | 146.6% (63.7 to 282.3%)             | 22 (16.4–30.1)           | -8.4% (-35.7 to 34%)                | 0.64                     |
|                              |       | Sudan                        | 10.1 (6.3–15.1)           | 108.2% (7.4 to 272.2%)              | 24.3 (15.7–35.3)         | 34.3% (-24.9 to 114.5%)             | 0.42                     |

Data in parentheses are 95% uncertainty intervals. Count data in thousands and percentage data are rounded to one decimal place, and sex ratio is rounded to two decimal place. Percentages and number of DALYs, YLDs, YLLs, deaths, incident cases, and prevalent cases are not mutually exclusive: the sum of percentages and number of DALYs, YLDs, YLLs, deaths, incident cases, and prevalent cases in the columns exceeds the totals for all causes combined because of overlap between various causes. Measures with insufficient data are not reported here. DALYs Disability-Adjusted Life Years; F:M, Female to male ratio; NA, no data available; UI uncertainty interval; YLDs Years Lived with Disability; YLLs Years of Life Lost; \*Stroke include ischaemic stroke, intracerebral haemorrhage, and subarachnoid haemorrhage; †Neurological disorders include Alzheimer's disease and other dementias, Parkinson's disease, idiopathic epilepsy, multiple sclerosis, headache disorders (including migraine and tension-type headache), motor neuron disease, and other neurological disorders.

**Table S12 Burden, mortality, incidence, and prevalence of neurological conditions in North Africa and Middle East countries**

(NEXT PAGE)

|                                |     |
|--------------------------------|-----|
| Disability-Adjusted Life Years | 196 |
| Deaths                         | 205 |
| Incidence                      | 214 |
| Prevalence                     | 224 |
| Years Lived with Disability    | 235 |
| Years of Life Lost             | 245 |



**Table S12** Burden, mortality, incidence, and prevalence of neurological conditions in North Africa and Middle East countries

| Measure                                       | Cause | Location                                | All Ages                        | Percent change           | Age-standardised       | Percent change           |
|-----------------------------------------------|-------|-----------------------------------------|---------------------------------|--------------------------|------------------------|--------------------------|
|                                               |       |                                         | Number                          | From 1990 to 2019        | Rate per 100,000       | From 1990 to 2019        |
|                                               |       |                                         | 2019                            | Mean (95% UI)            | 2019                   | Mean (95% UI)            |
| <b>DALYs (Disability-Adjusted Life Years)</b> |       |                                         |                                 |                          |                        |                          |
| Global                                        |       | Meningitis                              | 16333198 (13775122–19609767)    | -51·3% (-59·4 to -42%)   | 234 (195·8–282·5)      | -57·2% (-64·4 to -48·6%) |
|                                               |       | Encephalitis                            | 4797407 (4059493–6418088)       | -43·4% (-55·8 to -15·8%) | 65·3 (55·1–87·3)       | -54·3% (-63·9 to -32·9%) |
|                                               |       | Tetanus                                 | 2316381 (1770002–3279408)       | -89·4% (-92·1 to -83·8%) | 33·7 (25·6–47·9)       | -90·2% (-92·7 to -85·1%) |
|                                               |       | Brain and central nervous system cancer | 8659871 (6718029–9574458)       | 40·5% (-13·2 to 66·9%)   | 109 (84·6–120·9)       | -10·4% (-43·5 to 5·3%)   |
|                                               |       | Stroke*                                 | 143232184 (133095809–153241824) | 32·4% (22 to 42·2%)      | 1768·1 (1640·6–1889·4) | -35·2% (-40·5 to -30·5%) |
|                                               |       | Ischaemic stroke                        | 63478272 (57827413–68986524)    | 56·7% (43·3 to 67·9%)    | 798·8 (727·5–866·9)    | -28·5% (-34·7 to -23·2%) |
|                                               |       | Intracerebral haemorrhage               | 68572498 (63272310–73681973)    | 25·3% (12·2 to 36·3%)    | 832·8 (769·2–894·7)    | -36·7% (-43·3 to -31%)   |
|                                               |       | Subarachnoid haemorrhage                | 11181414 (9893414–12668877)     | -13·8% (-25·7 to 17%)    | 136·5 (120·8–154·7)    | -54·2% (-60·6 to -37·5%) |
|                                               |       | Neurological disorders†                 | 97724412 (55942819–159416793)   | 69·9% (58·7 to 90%)      | 1253·6 (719·7–2039·8)  | -0·8% (-5·1 to 3·1%)     |
|                                               |       | Alzheimer's disease and other dementias | 25276989 (11204523–54558243)    | 161·6% (149·7 to 175·7%) | 338·6 (151–731·3)      | 3·7% (-0·3 to 8·1%)      |
|                                               |       | Parkinson's disease                     | 6292616 (5769210–6827207)       | 128·9% (113·3 to 142·5%) | 80 (73·3–86·6)         | 2·4% (-4·4 to 8·2%)      |
|                                               |       | Idiopathic epilepsy                     | 13077624 (9986730–16734086)     | 15·9% (0 to 42·1%)       | 170·6 (130·4–218·3)    | -16·5% (-27·4 to 1·7%)   |
|                                               |       | Multiple sclerosis                      | 1159832 (1001180–1381870)       | 59·7% (46·6 to 72·7%)    | 14 (12–16·6)           | -13·2% (-20·9 to -6·3%)  |
|                                               |       | Migraine                                | 42077666 (6418383–95645211)     | 56·6% (52·6 to 62·1%)    | 525·5 (78·8–1194)      | 1·5% (-4·4 to 3·3%)      |
|                                               |       | Tension-type headache                   | 4541689 (1395546–14981336)      | 57·8% (45·1 to 65·9%)    | 56·2 (17–188·5)        | -2·5% (-5·4 to 1·1%)     |
|                                               |       | Motor neuron disease                    | 1034607 (979911–1085401)        | 65·7% (55·5 to 77·7%)    | 12·7 (12–13·3)         | -4·5% (-10·1 to 1·9%)    |
|                                               |       | Other neurological disorders            | 4263390 (3458864–5174136)       | 56·5% (41·8 to 74·3%)    | 55·9 (45·2–68·3)       | 10·8% (0·4 to 22·9%)     |
|                                               |       | Headache disorders                      | 46619355 (9772903–100161726)    | 56·7% (52·4 to 62·1%)    | 581·8 (119·6–1255·6)   | 1·1% (-4·2 to 2·9%)      |
| North Africa and Middle East                  |       | Meningitis                              | 412772 (345204–495004)          | -70·5% (-77·5 to -62·3%) | 70 (58·7–83·7)         | -75·8% (-81·1 to -69·5%) |
|                                               |       | Encephalitis                            | 251049 (200161–332874)          | 13·5% (-21 to 59·6%)     | 42 (33·6–55·6)         | -20·7% (-43·3 to 8·7%)   |
|                                               |       | Tetanus                                 | 87412 (53608–139520)            | -85·8% (-92·9 to -68·7%) | 15 (9·2–24·1)          | -88·2% (-93·9 to -76·1%) |
|                                               |       | Brain and central nervous system cancer | 716271 (493932–848226)          | 71% (0·9 to 131·7%)      | 128·3 (87·8–151·3)     | -5% (-40 to 23·4%)       |
|                                               |       | Stroke*                                 | 7946004 (7060209–8870766)       | 43·3% (27·2 to 61·4%)    | 1826·2 (1635·3–2026·2) | -32% (-39·1 to -23·3%)   |
|                                               |       | Ischaemic stroke                        | 4751376 (4227735–5271899)       | 120% (89 to 148·1%)      | 1183·6 (1060·8–1307)   | -8·8% (-19·6 to 2·2%)    |
|                                               |       | Intracerebral haemorrhage               | 2702244 (2343718–3120307)       | 3·4% (-12·3 to 21·4%)    | 548·4 (479·5–623·1)    | -51·7% (-58·2 to -43·8%) |
|                                               |       | Subarachnoid haemorrhage                | 492385 (408280–617218)          | -36% (-50·6 to 6·8%)     | 94·2 (79–116·8)        | -62·8% (-71·6 to -41%)   |
|                                               |       | Neurological disorders†                 | 7156041 (3769688–12184398)      | 91·1% (72 to 109·7%)     | 1382·1 (776·6–2273·8)  | -3·9% (-10·3 to 3·5%)    |
|                                               |       | Alzheimer's disease and other dementias | 1208064 (532026–2672826)        | 177·3% (161·1 to 215·8%) | 387 (172–848·5)        | -1·1% (-6·6 to 12·1%)    |
|                                               |       | Parkinson's disease                     | 300698 (266277–365360)          | 163·8% (134·8 to 202·1%) | 84·4 (74·7–103·2)      | 0·9% (-10·2 to 15·7%)    |
|                                               |       | Idiopathic epilepsy                     | 955271 (682842–1293169)         | 13·8% (-13·8 to 56%)     | 158·3 (112·6–213·2)    | -26·2% (-43·6 to -1·1%)  |
|                                               |       | Multiple sclerosis                      | 115886 (93053–144758)           | 146% (98·9 to 205·5%)    | 19·9 (16·1–24·7)       | 6·2% (-11·6 to 30·5%)    |
|                                               |       | Migraine                                | 3793207 (645291–8665809)        | 102·1% (93·2 to 125·1%)  | 601·4 (107–1371·8)     | 0% (-1·6 to 1·6%)        |
|                                               |       | Tension-type headache                   | 416595 (138258–1196825)         | 115·5% (84·9 to 132·3%)  | 68·1 (22·8–195·5)      | 1% (-9·5 to 8·7%)        |

**Table S12** Burden, mortality, incidence, and prevalence of neurological conditions in North Africa and Middle East countries

| Measure               | Cause                                   | Location           | All Ages                 |                          | Age-standardised       |                          |
|-----------------------|-----------------------------------------|--------------------|--------------------------|--------------------------|------------------------|--------------------------|
|                       |                                         |                    | Number                   | Percent change           | Rate per 100,000       | Percent change           |
|                       |                                         |                    | 2019                     | From 1990 to 2019        | 2019                   | From 1990 to 2019        |
|                       |                                         | Mean (95% UI)      | Mean (95% UI)            | Mean (95% UI)            | Mean (95% UI)          |                          |
| Algeria               | Motor neuron disease                    |                    | 41628 (33815–50605)      | 22.5% (-28.9 to 88.7%)   | 7.8 (6.4–9.5)          | -16.6% (-44.8 to 17.9%)  |
|                       | Other neurological disorders            |                    | 324691 (250401–417325)   | 59.4% (26.5 to 98.9%)    | 55.2 (43–70.4)         | 6.3% (-13.5 to 30.6%)    |
|                       | Headache disorders                      |                    | 4209802 (990143–9068319) | 103.3% (94.5 to 123.7%)  | 669.6 (159.1–1431.3)   | 0.1% (-2.4 to 2.4%)      |
|                       | Meningitis                              |                    | 16224 (13337–20098)      | -74.7% (-84.2 to -61.1%) | 40 (33.1–49.1)         | -80.2% (-87 to -70.7%)   |
|                       | Encephalitis                            |                    | 8284 (5881–14740)        | -2.5% (-38.8 to 49.8%)   | 20.1 (14.4–35.4)       | -28.7% (-52.4 to 3.6%)   |
|                       | Tetanus                                 |                    | 540 (393–943)            | -83% (-93.5 to -41.9%)   | 1.3 (0.9–2.3)          | -86.7% (-94.8 to -60.7%) |
|                       | Brain and central nervous system cancer |                    | 23674 (14317–30164)      | 56.3% (-16.5 to 120.5%)  | 58.3 (35.3–73.9)       | -6% (-49.9 to 28.7%)     |
|                       | Stroke*                                 |                    | 543945 (450965–649230)   | 47% (18.7 to 82.1%)      | 1755.4 (1459.6–2081.9) | -44.6% (-55 to -31.9%)   |
|                       | Ischaemic stroke                        |                    | 372749 (302683–448803)   | 126.7% (81.1 to 182.3%)  | 1275.1 (1052.8–1530.2) | -24.7% (-38.7 to -8.3%)  |
|                       | Intracerebral haemorrhage               |                    | 142325 (112671–177630)   | -16.1% (-35.6 to 10.1%)  | 403.4 (322.4–501.3)    | -67.9% (-75.6 to -58.4%) |
|                       | Subarachnoid haemorrhage                |                    | 28872 (22118–38126)      | -19.8% (-42.2 to 28%)    | 76.8 (58.2–100.2)      | -64.6% (-74.6 to -44.4%) |
|                       | Neurological disorders†                 |                    | 494778 (254585–842878)   | 82.8% (47.3 to 123.8%)   | 1365.1 (738.5–2292)    | -8.4% (-21.4 to 5%)      |
|                       | Alzheimer's disease and other dementias |                    | 95573 (41570–217272)     | 228.9% (176.4 to 291.6%) | 401.3 (176.1–912.8)    | -5% (-17.6 to 8.7%)      |
|                       | Parkinson's disease                     |                    | 21708 (17579–26334)      | 161.4% (106 to 229.3%)   | 78.9 (64.1–95.1)       | -18.1% (-35.7 to 3.6%)   |
|                       | Idiopathic epilepsy                     |                    | 60483 (29802–101772)     | -8.6% (-58.6 to 82.6%)   | 146.2 (70.8–246.9)     | -38% (-72.5 to 25.8%)    |
|                       | Multiple sclerosis                      |                    | 8523 (5733–11226)        | 178.8% (106.5 to 257.5%) | 20.1 (13.6–26.4)       | 12.2% (-14.2 to 41.1%)   |
|                       | Migraine                                |                    | 259963 (44334–590017)    | 89% (76.7 to 120.2%)     | 602.5 (103.9–1372.1)   | -0.2% (-3.2 to 3.1%)     |
| Tension-type headache |                                         | 28460 (9650–79524) | 106.7% (73.1 to 140.3%)  | 66.7 (22.6–189)          | 0.3% (-10.2 to 7.9%)   |                          |
| Bahrain               | Motor neuron disease                    |                    | 1023 (806–1285)          | 115.9% (60.6 to 191.1%)  | 2.5 (2–3.2)            | -2% (-28.3 to 36.3%)     |
|                       | Other neurological disorders            |                    | 19045 (11271–30215)      | 53.7% (-21.7 to 206.7%)  | 46.8 (28.1–73.9)       | 4.8% (-45.2 to 93.8%)    |
|                       | Headache disorders                      |                    | 288424 (67480–615898)    | 90.7% (78.3 to 119.7%)   | 669.2 (155.7–1442.3)   | -0.1% (-3.5 to 3.1%)     |
|                       | Meningitis                              |                    | 208 (175–248)            | -42.7% (-55.7 to -26.8%) | 18.6 (15.8–21.8)       | -74.5% (-79.6 to -67.8%) |
|                       | Encephalitis                            |                    | 141 (113–171)            | 69.5% (28.5 to 110.5%)   | 11.4 (9.2–13.8)        | -25.8% (-43.7 to -8.4%)  |
|                       | Tetanus                                 |                    | 10 (8–14)                | 37.3% (-40.9 to 115%)    | 0.7 (0.6–1.2)          | -39.3% (-75 to -6.6%)    |
|                       | Brain and central nervous system cancer |                    | 1022 (618–1352)          | 186.4% (67.5 to 302.3%)  | 73 (46.7–93.3)         | -25% (-55.8 to 6.5%)     |
|                       | Stroke*                                 |                    | 7987 (6663–9690)         | 111% (71.2 to 164.3%)    | 940.9 (796.8–1146.2)   | -52.5% (-61.2 to -42.5%) |
|                       | Ischaemic stroke                        |                    | 4155 (3482–5019)         | 165.2% (120.6 to 220%)   | 613.6 (521.7–746.7)    | -43.9% (-53.5 to -33%)   |
|                       | Intracerebral haemorrhage               |                    | 2952 (2394–3662)         | 78.6% (36.6 to 133.3%)   | 264.6 (217.2–326.5)    | -64.2% (-72 to -54.2%)   |
|                       | Subarachnoid haemorrhage                |                    | 880 (677–1193)           | 55.4% (12.2 to 135.2%)   | 62.6 (48.6–85.6)       | -58.1% (-70.1 to -41.3%) |
|                       | Neurological disorders†                 |                    | 16094 (7722–28555)       | 199.3% (134.7 to 269.8%) | 1387.6 (768.6–2266.4)  | -8% (-23.9 to 8.1%)      |
|                       | Alzheimer's disease and other dementias |                    | 1694 (733–3909)          | 398.1% (321.9 to 486.1%) | 403.1 (176.2–888.6)    | -3.8% (-15 to 9.1%)      |
|                       | Parkinson's disease                     |                    | 467 (340–573)            | 299.2% (213.3 to 401.9%) | 88.5 (64.1–106.6)      | -13.5% (-32.1 to 7.5%)   |
|                       | Idiopathic epilepsy                     |                    | 2334 (1088–4053)         | 83.1% (-17.9 to 303.1%)  | 186.8 (86.8–326.3)     | -31.7% (-70 to 51.3%)    |
|                       | Multiple sclerosis                      |                    | 232 (166–309)            | 446% (337.3 to 558%)     | 12.5 (9.1–16.2)        | 12.3% (-7.6 to 32.6%)    |
|                       | Migraine                                |                    | 9458 (1762–21196)        | 219.3% (197 to 279.3%)   | 564.5 (100.5–1278.1)   | -0.7% (-3.9 to 2.8%)     |
| Tension-type headache |                                         | 1117 (386–3084)    | 254.2% (197.7 to 330.7%) | 64.6 (21.3–189.3)        | -0.3% (-10.7 to 7.7%)  |                          |
| Egypt                 | Motor neuron disease                    |                    | 33 (27–40)               | 114.5% (70.4 to 169.7%)  | 2.1 (1.7–2.5)          | -54.1% (-64.1 to -42.6%) |
|                       | Other neurological disorders            |                    | 759 (484–1160)           | 145% (44 to 321.6%)      | 65.6 (41.9–99.2)       | 0.3% (-39.8 to 65.6%)    |
|                       | Headache disorders                      |                    | 10575 (2641–22348)       | 222.7% (200.3 to 275.9%) | 629 (149.4–1360.3)     | -0.6% (-3.9 to 2.8%)     |
|                       | Meningitis                              |                    | 54627 (37527–74295)      | -68.1% (-78.3 to -54.2%) | 54 (37.4–73.2)         | -75.7% (-83.3 to -65.6%) |
|                       | Encephalitis                            |                    | 65047 (33529–102544)     | -4.1% (-43.1 to 56%)     | 62.8 (33.5–98.7)       | -31.9% (-58.4 to 4.5%)   |
|                       | Tetanus                                 |                    | 7406 (2206–21957)        | -87.3% (-96.4 to -60.1%) | 7.7 (2.5–23.2)         | -90.8% (-97 to -71.7%)   |
|                       | Brain and central nervous system cancer |                    | 89056 (61392–125531)     | 73.5% (-5.9 to 153.7%)   | 98.8 (68.1–141.1)      | -1.8% (-40.8 to 39.9%)   |

**Table S12** Burden, mortality, incidence, and prevalence of neurological conditions in North Africa and Middle East countries

| Measure                                 | Cause                                   | Location               | All Ages                  |                          | Age-standardised         |                          |                          |
|-----------------------------------------|-----------------------------------------|------------------------|---------------------------|--------------------------|--------------------------|--------------------------|--------------------------|
|                                         |                                         |                        | Number                    | Percent change           | Rate per 100,000         | Percent change           |                          |
|                                         |                                         |                        | 2019                      | From 1990 to 2019        | 2019                     | From 1990 to 2019        |                          |
|                                         |                                         | Mean (95% UI)          | Mean (95% UI)             | Mean (95% UI)            | Mean (95% UI)            |                          |                          |
| Iran (Islamic Republic of)              | Stroke*                                 |                        | 1493970 (1146402–1946512) | -7.4% (-31.5 to 33.5%)   | 2138 (1636.8–2809.8)     | -35.5% (-50 to -17%)     |                          |
|                                         | Ischaemic stroke                        |                        | 863083 (669024–1115487)   | 99% (43.1 to 170.4%)     | 1381.5 (1070.2–1804.1)   | 13.7% (-15.5 to 43.8%)   |                          |
|                                         | Intracerebral haemorrhage               |                        | 525945 (380648–714428)    | -36.5% (-56.7 to -7.1%)  | 641.8 (460.5–884.3)      | -59.8% (-70.7 to -45.5%) |                          |
|                                         | Subarachnoid haemorrhage                |                        | 104943 (74559–145019)     | -70.2% (-82.6 to -30.8%) | 114.7 (82.7–158)         | -77.4% (-85.6 to -52.9%) |                          |
|                                         | Neurological disorders†                 |                        | 1050487 (470197–1877241)  | 92% (55.8 to 126.9%)     | 1336.2 (709.8–2284.8)    | 0.9% (-13.5 to 15.6%)    |                          |
|                                         | Alzheimer's disease and other dementias |                        | 135572 (59535–305476)     | 112.3% (83 to 155.6%)    | 362.4 (160.1–793.2)      | 0.2% (-12.4 to 18.8%)    |                          |
|                                         | Parkinson's disease                     |                        | 48343 (37833–67875)       | 135.2% (88.1 to 190.9%)  | 98.6 (77.1–142.4)        | 11.7% (-9.4 to 36.5%)    |                          |
|                                         | Idiopathic epilepsy                     |                        | 111651 (44159–202534)     | 34.2% (-51.1 to 227.5%)  | 110.6 (43.3–200)         | -19.5% (-70.4 to 99.5%)  |                          |
|                                         | Multiple sclerosis                      |                        | 14335 (8608–35878)        | 95.5% (-16.2 to 400.6%)  | 15.3 (9.6–32.4)          | 6.4% (-44.2 to 137.3%)   |                          |
|                                         | Migraine                                |                        | 619621 (96677–1426392)    | 98.2% (84.3 to 113.8%)   | 621.1 (104–1420.2)       | 1.9% (-5.1 to 9.1%)      |                          |
|                                         | Tension-type headache                   |                        | 65173 (20989–196744)      | 100.8% (75 to 120.6%)    | 69.1 (22.6–207.8)        | 1.4% (-10.1 to 10.8%)    |                          |
|                                         | Motor neuron disease                    |                        | 6483 (3807–10066)         | 221.4% (80.1 to 420.3%)  | 7.9 (4.6–12.4)           | 69.4% (-4.4 to 176.8%)   |                          |
|                                         | Other neurological disorders            |                        | 49309 (28736–76336)       | 96.3% (6.1 to 252.8%)    | 51.2 (31.7–76)           | 25.2% (-28.1 to 108.4%)  |                          |
|                                         | Headache disorders                      |                        | 684794 (147091–1491960)   | 98.4% (84.9 to 112.8%)   | 690.3 (156.4–1488.7)     | 1.9% (-4.8 to 8.6%)      |                          |
|                                         | Meningitis                              |                        | 30092 (26169–34399)       | -79% (-84.1 to -71.6%)   | 38.6 (33.5–44.3)         | -79.2% (-84.1 to -72.5%) |                          |
|                                         | Encephalitis                            |                        | 12690 (10236–14589)       | -13.4% (-37.5 to 14.3%)  | 16.3 (12.8–19)           | -22.1% (-41.5 to -0.8%)  |                          |
|                                         | Tetanus                                 |                        | 911 (693–1254)            | -94.4% (-97.6 to -82.1%) | 1.2 (0.9–1.7)            | -94.1% (-97.4 to -82.3%) |                          |
|                                         | Brain and central nervous system cancer |                        | 128547 (67682–153606)     | 40.5% (-27.9 to 81.4%)   | 156.4 (82–187)           | -10.7% (-50.1 to 8.5%)   |                          |
|                                         | Iraq                                    | Stroke*                |                           | 884768 (812248–943655)   | 48.2% (33.4 to 63.4%)    | 1262.2 (1153.5–1346.3)   | -45.7% (-51 to -38.3%)   |
|                                         |                                         | Ischaemic stroke       |                           | 668904 (607976–717571)   | 68.5% (51.1 to 87.3%)    | 984.4 (890–1054.7)       | -42.8% (-48.2 to -34.9%) |
| Intracerebral haemorrhage               |                                         |                        | 172626 (162359–183216)    | 6.8% (-6.5 to 20.4%)     | 223.3 (209.6–236.3)      | -53.6% (-59.9 to -47.4%) |                          |
| Subarachnoid haemorrhage                |                                         |                        | 43238 (38360–50622)       | 12.4% (-15.5 to 70.6%)   | 54.6 (48.5–62.6)         | -55.7% (-68.1 to -31.7%) |                          |
| Neurological disorders†                 |                                         |                        | 1103459 (584174–1853014)  | 80.4% (60.7 to 111.9%)   | 1394.2 (785.8–2300.9)    | -4.1% (-10.3 to 4.7%)    |                          |
| Alzheimer's disease and other dementias |                                         |                        | 228128 (100792–497824)    | 314.3% (277 to 401.2%)   | 386 (170.3–844)          | 0% (-5.4 to 21.3%)       |                          |
| Parkinson's disease                     |                                         |                        | 48779 (42378–53932)       | 253.3% (207.9 to 313.5%) | 76.8 (66.9–84.9)         | 3.1% (-12.9 to 20.5%)    |                          |
| Idiopathic epilepsy                     |                                         |                        | 113267 (78371–155611)     | -22.8% (-43.4 to 6.4%)   | 140.2 (96.1–192.5)       | -34.8% (-51.4 to -13%)   |                          |
| Multiple sclerosis                      |                                         |                        | 26915 (21772–34918)       | 143.4% (103.1 to 191.7%) | 29.2 (23.7–37.4)         | 0.5% (-18.6 to 20.3%)    |                          |
| Migraine                                |                                         |                        | 571655 (107029–1282201)   | 77.6% (63.7 to 117.4%)   | 628.3 (115.2–1411.2)     | -0.3% (-3.6 to 4.1%)     |                          |
| Tension-type headache                   |                                         |                        | 70182 (23015–207136)      | 103.8% (70.9 to 131.5%)  | 77.6 (24.9–236.4)        | 5.2% (-5.7 to 15.9%)     |                          |
| Motor neuron disease                    |                                         |                        | 3832 (3359–4363)          | 170.1% (88.7 to 257.6%)  | 4.7 (4.1–5.4)            | 43.7% (1 to 90.3%)       |                          |
| Other neurological disorders            |                                         |                        | 40701 (31189–51857)       | 48.5% (19.8 to 84.1%)    | 51.5 (39.2–66.3)         | 20.2% (-2.5 to 47.4%)    |                          |
| Headache disorders                      |                                         |                        | 641837 (160733–1355804)   | 80.2% (66.5 to 117.2%)   | 705.8 (173.2–1503.1)     | 0.3% (-3.3 to 5.8%)      |                          |
| Meningitis                              |                                         |                        | 28390 (22192–36269)       | -69.6% (-79 to -56.4%)   | 67.4 (53.4–84.6)         | -80% (-85.7 to -72.4%)   |                          |
| Encephalitis                            |                                         |                        | 30409 (21118–40443)       | 17.8% (-27.9 to 88.4%)   | 70.5 (50.3–92.5)         | -33.8% (-56.9 to -2%)    |                          |
| Tetanus                                 |                                         |                        | 1783 (1014–3003)          | -91.2% (-97.3 to -53.5%) | 4 (2.3–6.7)              | -93.8% (-98 to -72.8%)   |                          |
| Brain and central nervous system cancer |                                         |                        | 79865 (57728–103168)      | 164.2% (32 to 325.9%)    | 225.6 (162.9–289)        | 15.2% (-39.2 to 79.6%)   |                          |
| Stroke*                                 |                                         |                        | 682943 (548026–826273)    | 117.8% (72 to 174.5%)    | 2922.9 (2399–3459.1)     | -19.4% (-35.5 to -0.8%)  |                          |
| Ischaemic stroke                        |                                         |                        | 373159 (305766–438919)    | 153.9% (101.6 to 214.7%) | 1828.9 (1525.3–2123.6)   | -7% (-25.1 to 13.7%)     |                          |
| Intracerebral haemorrhage               |                                         | 287202 (221961–364476) | 99.7% (51.7 to 165.7%)    | 1022 (808.4–1271.1)      | -30% (-47 to -9.1%)      |                          |                          |
| Subarachnoid haemorrhage                |                                         | 22582 (16870–30599)    | -1.1% (-34.8 to 60.2%)    | 72.1 (54.4–97.2)         | -64.1% (-76.6 to -41.4%) |                          |                          |
| Neurological disorders†                 |                                         | 437763 (204665–786450) | 153.1% (104.7 to 201.9%)  | 1331.8 (715.6–2250.9)    | -1.7% (-14 to 12.3%)     |                          |                          |
| Alzheimer's disease and other dementias |                                         | 57498 (25205–128176)   | 157.1% (125 to 195.1%)    | 382 (168.2–826.8)        | 1.9% (-9.7 to 16.3%)     |                          |                          |

**Table S12** Burden, mortality, incidence, and prevalence of neurological conditions in North Africa and Middle East countries

| Measure                                 | Cause                                   | Location           | All Ages                 |                          | Age-standardised         |                          |
|-----------------------------------------|-----------------------------------------|--------------------|--------------------------|--------------------------|--------------------------|--------------------------|
|                                         |                                         |                    | Number                   | Percent change           | Rate per 100,000         | Percent change           |
|                                         |                                         |                    | 2019                     | From 1990 to 2019        | 2019                     | From 1990 to 2019        |
|                                         |                                         | Mean (95% UI)      | Mean (95% UI)            | Mean (95% UI)            | Mean (95% UI)            |                          |
| Jordan                                  | Parkinson's disease                     |                    | 14973 (12204–20254)      | 209·1% (147·3 to 290·7%) | 85·6 (71–115·2)          | 17·5% (-5·7 to 47·1%)    |
|                                         | Idiopathic epilepsy                     |                    | 56263 (24821–98677)      | 59·3% (-31·4 to 252·4%)  | 131 (57·8–229·5)         | -29·4% (-69·3 to 55·2%)  |
|                                         | Multiple sclerosis                      |                    | 4893 (3596–6482)         | 254% (186·9 to 340·3%)   | 14·3 (10·6–18·6)         | 12·4% (-8·4 to 39·2%)    |
|                                         | Migraine                                |                    | 253176 (40135–580495)    | 181·6% (170·8 to 206·2%) | 595·4 (102·8–1355·6)     | 0·3% (-2·8 to 3·2%)      |
|                                         | Tension-type headache                   |                    | 26343 (8663–77009)       | 193·4% (151·1 to 230·5%) | 66·2 (22·1–190·3)        | 0·7% (-11·1 to 9·1%)     |
|                                         | Motor neuron disease                    |                    | 640 (495–796)            | 188% (107·4 to 289·5%)   | 1·8 (1·4–2·3)            | 10·6% (-27 to 58·4%)     |
|                                         | Other neurological disorders            |                    | 23978 (15008–36485)      | 140·8% (37·7 to 315·4%)  | 55·4 (36·1–82·1)         | 14·4% (-32·3 to 91·1%)   |
|                                         | Headache disorders                      |                    | 279519 (60086–621233)    | 182·7% (170·9 to 204·1%) | 661·6 (153–1427·4)       | 0·3% (-3·3 to 3·5%)      |
|                                         | Meningitis                              |                    | 5929 (4734–7496)         | 5% (-25·9 to 50·7%)      | 52·6 (42·4–66·4)         | -56·5% (-68 to -39·5%)   |
|                                         | Encephalitis                            |                    | 1262 (993–1679)          | 2·4% (-35·5 to 154·6%)   | 10·9 (8·6–14·6)          | -60·2% (-74·1 to -9·7%)  |
|                                         | Tetanus                                 |                    | 118 (87–174)             | -71·7% (-86·8 to -12·3%) | 1 (0·7–1·5)              | -85·7% (-93·3 to -59%)   |
|                                         | Brain and central nervous system cancer |                    | 9737 (6956–12042)        | 202·2% (91·8 to 309·7%)  | 97·8 (69·5–120·6)        | -10·2% (-43·7 to 22·2%)  |
|                                         | Stroke*                                 |                    | 86118 (72852–100150)     | 133·8% (94 to 178·9%)    | 1448 (1220·4–1679·5)     | -50·2% (-58·7 to -41·1%) |
|                                         | Ischaemic stroke                        |                    | 59926 (50568–69639)      | 161·4% (114·5 to 207·5%) | 1083·5 (911·7–1252·3)    | -46·3% (-56·1 to -36·4%) |
|                                         | Intracerebral haemorrhage               |                    | 22856 (19316–27054)      | 83·5% (47·7 to 127·3%)   | 325·6 (273·5–385·1)      | -60% (-67·8 to -50·4%)   |
|                                         | Subarachnoid haemorrhage                |                    | 3335 (2693–4084)         | 129·6% (69·5 to 228·8%)  | 38·9 (30·6–47·5)         | -49·8% (-63·8 to -27·7%) |
|                                         | Neurological disorders†                 |                    | 118079 (54388–213589)    | 243·5% (184·7 to 317·9%) | 1291·8 (687·7–2194·4)    | -4·7% (-17·1 to 8·6%)    |
| Alzheimer's disease and other dementias |                                         | 14828 (6605–32942) | 385·3% (325·6 to 465·5%) | 369·7 (165·2–822·8)      | -4·5% (-15·9 to 11·3%)   |                          |
| Kuwait                                  | Parkinson's disease                     |                    | 3534 (3007–4138)         | 335·8% (254·4 to 432·2%) | 74·2 (63–86·7)           | -14% (-29·8 to 5%)       |
|                                         | Idiopathic epilepsy                     |                    | 14136 (6162–26671)       | 131·8% (-9·3 to 452%)    | 119·4 (51·7–224·9)       | -22·1% (-69·1 to 83·1%)  |
|                                         | Multiple sclerosis                      |                    | 1903 (1351–2405)         | 325% (236·9 to 413%)     | 19 (13·6–23·9)           | -6·9% (-24·9 to 11·7%)   |
|                                         | Migraine                                |                    | 70088 (11911–160288)     | 250·2% (230·2 to 298·6%) | 590·3 (104–1339·1)       | -0·8% (-4 to 2·5%)       |
|                                         | Tension-type headache                   |                    | 7406 (2514–21769)        | 276·6% (221·8 to 332·8%) | 66·2 (22·7–191·4)        | 0·1% (-10·9 to 8·3%)     |
|                                         | Motor neuron disease                    |                    | 338 (265–446)            | 424·1% (275·5 to 637·8%) | 3·2 (2·5–4·2)            | 35·8% (-4·5 to 97%)      |
|                                         | Other neurological disorders            |                    | 5844 (3502–9358)         | 204·1% (65·9 to 443·5%)  | 49·9 (31·3–77·7)         | 10·7% (-35·4 to 83·8%)   |
|                                         | Headache disorders                      |                    | 77495 (17367–171586)     | 252·5% (233·2 to 298·1%) | 656·4 (153·8–1428·7)     | -0·7% (-3·9 to 2·5%)     |
|                                         | Meningitis                              |                    | 749 (606–917)            | -22% (-40·2 to -0·4%)    | 20·1 (16·2–24·7)         | -63·1% (-71·8 to -53·2%) |
|                                         | Encephalitis                            |                    | 403 (333–511)            | 54·1% (26·4 to 92%)      | 10·5 (8·6–13·3)          | -26·5% (-40·1 to -8·6%)  |
|                                         | Tetanus                                 |                    | 1 (0–3)                  | 86·7% (-69·6 to 628·3%)  | 0 (0–0·1)                | -46·1% (-88·3 to 68%)    |
|                                         | Brain and central nervous system cancer |                    | 2478 (1736–3106)         | 137·7% (45·9 to 204·1%)  | 66·2 (47–82·8)           | -8·6% (-44·1 to 16·6%)   |
|                                         | Stroke*                                 |                    | 25463 (21787–29824)      | 232·8% (186·6 to 287·4%) | 938·4 (795–1093·3)       | -11·7% (-24 to 3·3%)     |
|                                         | Ischaemic stroke                        |                    | 15225 (12984–17974)      | 252·5% (206·4 to 307%)   | 645·4 (546·5–754·4)      | -12% (-24 to 2·4%)       |
|                                         | Intracerebral haemorrhage               |                    | 8432 (6893–10043)        | 252·7% (182·6 to 330·1%) | 246 (201·3–294)          | -4·2% (-23·3 to 18%)     |
|                                         | Subarachnoid haemorrhage                |                    | 1807 (1476–2200)         | 92·1% (52·5 to 179·1%)   | 47 (38·9–56·6)           | -34·9% (-48·1 to -11·3%) |
|                                         | Neurological disorders†                 |                    | 49272 (22503–88625)      | 181·9% (131·6 to 238·7%) | 1294·9 (693·8–2173·2)    | -4·3% (-17·6 to 9·3%)    |
| Alzheimer's disease and other dementias |                                         | 6860 (3079–14690)  | 387·2% (341·5 to 440%)   | 387·3 (174–837·8)        | -2·6% (-11·2 to 6·9%)    |                          |
| Parkinson's disease                     |                                         | 1052 (894–1255)    | 221% (180·8 to 271·8%)   | 56·1 (47·2–66)           | -26·8% (-36·5 to -14·7%) |                          |
| Idiopathic epilepsy                     |                                         | 5505 (2389–10479)  | 74·2% (-22·8 to 296·6%)  | 138·9 (58·5–268·6)       | -22·2% (-66·5 to 81·8%)  |                          |
| Multiple sclerosis                      |                                         | 894 (644–1180)     | 414·3% (336·1 to 505·8%) | 17·3 (12·8–22·6)         | 38·2% (21·1 to 58·7%)    |                          |
| Migraine                                |                                         | 29758 (5159–67375) | 190·2% (171·1 to 225·4%) | 578·3 (99·7–1315·1)      | 3·2% (-2·3 to 8·6%)      |                          |
| Tension-type headache                   |                                         | 3205 (1084–8967)   | 204·5% (159·1 to 260·4%) | 62·8 (20·8–186·4)        | 1·5% (-10·4 to 11·9%)    |                          |
| Motor neuron disease                    |                                         | 210 (155–262)      | -14% (-39·2 to 17·5%)    | 5·9 (4·3–7·5)            | -61·7% (-72·5 to -48·2%) |                          |
| Other neurological disorders            |                                         | 1788 (1032–3017)   | 108·4% (16·3 to 277·9%)  | 48·3 (28·3–81·4)         | -3·2% (-44·8 to 69·7%)   |                          |
| Headache disorders                      |                                         | 32963 (7555–71305) | 191·5% (173·1 to 225·4%) | 641·1 (146·8–1408)       | 3·1% (-2·3 to 7·9%)      |                          |

**Table S12** Burden, mortality, incidence, and prevalence of neurological conditions in North Africa and Middle East countries

| Measure                                 |                                         | All Ages               |                                     | Age-standardised         |                                     |                          |
|-----------------------------------------|-----------------------------------------|------------------------|-------------------------------------|--------------------------|-------------------------------------|--------------------------|
|                                         |                                         | Number<br>2019         | Percent change<br>From 1990 to 2019 | Rate per 100,000<br>2019 | Percent change<br>From 1990 to 2019 |                          |
| Cause                                   | Location                                | Mean (95% UI)          | Mean (95% UI)                       | Mean (95% UI)            | Mean (95% UI)                       |                          |
| Lebanon                                 | Meningitis                              | 1528 (1154–1994)       | -58.8% (-72.1 to -40.5%)            | 29.5 (22.2–38.5)         | -68.6% (-78 to -56.1%)              |                          |
|                                         | Encephalitis                            | 902 (609–1583)         | 14.4% (-22 to 59.7%)                | 17.5 (11.8–30.6)         | -19.2% (-42.9 to 10.2%)             |                          |
|                                         | Tetanus                                 | 767 (166–2657)         | -57.9% (-93 to 27.8%)               | 14.9 (3.2–50.9)          | -75.8% (-95.7 to -29.1%)            |                          |
|                                         | Brain and central nervous system cancer | 6094 (4252–7858)       | 59.8% (7.6 to 118.8%)               | 117.3 (82.6–151.5)       | -9% (-38.6 to 23.8%)                |                          |
|                                         | Stroke*                                 | 39216 (30874–48709)    | 63% (27.7 to 105.4%)                | 752.9 (593.3–935.9)      | -33.7% (-47.6 to -16%)              |                          |
|                                         | Ischaemic stroke                        | 31068 (24587–38151)    | 125.1% (71.9 to 176.4%)             | 597.8 (473.3–734.3)      | -15.1% (-34.7 to 4.6%)              |                          |
|                                         | Intracerebral haemorrhage               | 6732 (5020–8959)       | -19% (-40.5 to 9.9%)                | 128.4 (95.9–170.4)       | -64% (-73.7 to -51%)                |                          |
|                                         | Subarachnoid haemorrhage                | 1416 (991–1898)        | -27.4% (-55.8 to 16.4%)             | 26.7 (18.6–35.8)         | -64.3% (-78.7 to -41.8%)            |                          |
|                                         | Neurological disorders†                 | 69765 (36994–117533)   | 93.9% (63 to 142.7%)                | 1349.3 (721.7–2279.8)    | -3.4% (-16.8 to 12.3%)              |                          |
|                                         | Alzheimer's disease and other dementias | 19727 (8592–43392)     | 208.8% (166.4 to 308.3%)            | 395.6 (172.4–866.4)      | -2.3% (-15 to 29.1%)                |                          |
|                                         | Parkinson's disease                     | 3662 (3016–4825)       | 142.1% (82.7 to 213.3%)             | 69.5 (57.3–91.6)         | -14.2% (-35.2 to 11.2%)             |                          |
|                                         | Idiopathic epilepsy                     | 6786 (3216–12311)      | 11.9% (-52 to 153.2%)               | 132.9 (62.6–243.4)       | -25.6% (-67.3 to 68.6%)             |                          |
|                                         | Multiple sclerosis                      | 1270 (891–1630)        | 146.5% (97.3 to 209.4%)             | 23.5 (16.4–30.3)         | 20.9% (-2.5 to 51.3%)               |                          |
|                                         | Migraine                                | 31980 (5563–73108)     | 76.4% (68.2 to 92.7%)               | 605.8 (104–1385.5)       | 0.5% (-2.7 to 3.5%)                 |                          |
|                                         | Tension-type headache                   | 3565 (1217–10006)      | 86.4% (59 to 108.4%)                | 67 (22.7–191.7)          | 0.8% (-10.8 to 9.4%)                |                          |
|                                         | Motor neuron disease                    | 169 (112–261)          | 92.6% (25.8 to 185.4%)              | 3.3 (2.2–5.1)            | 4.5% (-32.1 to 55.6%)               |                          |
|                                         | Other neurological disorders            | 2606 (1643–4080)       | 90.1% (11.5 to 257.2%)              | 51.7 (32.2–80.9)         | 28.4% (-24.8 to 133.1%)             |                          |
|                                         | Libya                                   | Headache disorders     | 35546 (8399–77063)                  | 77.3% (68.9 to 92.6%)    | 672.7 (153.9–1457.6)                | 0.5% (-3.1 to 3.7%)      |
|                                         |                                         | Meningitis             | 2179 (1718–2754)                    | -68% (-78.4 to -53.9%)   | 36.2 (28.4–45.8)                    | -69.9% (-78.5 to -58.4%) |
| Encephalitis                            |                                         | 1025 (707–1917)        | 5.4% (-30.5 to 52.9%)               | 17.4 (11.9–31.6)         | -11.6% (-37.5 to 25.4%)             |                          |
| Tetanus                                 |                                         | 67 (44–116)            | -69.7% (-88.1 to -8.1%)             | 1.2 (0.7–2)              | -70.5% (-89.8 to -19%)              |                          |
| Brain and central nervous system cancer |                                         | 8639 (6346–11310)      | 71.6% (16.1 to 161.2%)              | 134.4 (99.2–175.6)       | -4.6% (-32.6 to 37.1%)              |                          |
| Stroke*                                 |                                         | 82320 (64181–104686)   | 52.5% (15.8 to 109.4%)              | 1570.5 (1237.3–2001.2)   | -21.3% (-37.5 to 1.4%)              |                          |
| Ischaemic stroke                        |                                         | 55357 (43126–71016)    | 164% (105.4 to 245.1%)              | 1122.6 (875.9–1435.2)    | 11.2% (-12 to 42.4%)                |                          |
| Intracerebral haemorrhage               |                                         | 22583 (16898–30609)    | -2.1% (-28.9 to 43%)                | 376.2 (284.9–504.4)      | -51.2% (-63.2 to -34.3%)            |                          |
| Subarachnoid haemorrhage                |                                         | 4380 (3189–6255)       | -56% (-73 to -4.1%)                 | 71.7 (51.6–101.4)        | -66.7% (-77.7 to -42.9%)            |                          |
| Neurological disorders†                 |                                         | 84590 (43792–145104)   | 95% (63.4 to 133.8%)                | 1378.2 (759.2–2303.8)    | -3% (-15.6 to 11.8%)                |                          |
| Alzheimer's disease and other dementias |                                         | 16595 (7063–37243)     | 161.3% (122.6 to 212.3%)            | 414.3 (176.1–925.9)      | -4.2% (-18.1 to 14.3%)              |                          |
| Parkinson's disease                     |                                         | 3712 (2836–4719)       | 206.8% (134.1 to 306.4%)            | 84.8 (65.3–108.4)        | 10.9% (-15.2 to 45.8%)              |                          |
| Idiopathic epilepsy                     |                                         | 9315 (5179–14869)      | 1.9% (-46.8 to 108.6%)              | 141 (77.2–226.1)         | -29% (-63.5 to 47.3%)               |                          |
| Multiple sclerosis                      |                                         | 1604 (1091–2241)       | 265% (176.8 to 418.4%)              | 21.8 (14.9–30.2)         | 34.2% (2.3 to 87.9%)                |                          |
| Migraine                                |                                         | 44893 (7730–101676)    | 103.6% (88.6 to 141.3%)             | 594.7 (104–1347)         | 1.3% (-1.9 to 4.4%)                 |                          |
| Tension-type headache                   |                                         | 4920 (1694–13899)      | 122.3% (84.9 to 164.2%)             | 66.4 (22.8–191)          | 1.1% (-11.2 to 9.5%)                |                          |
| Motor neuron disease                    |                                         | 243 (149–363)          | 215.6% (71.3 to 427.3%)             | 3.7 (2.3–5.4)            | 39.5% (-25.6 to 142%)               |                          |
| Other neurological disorders            |                                         | 3308 (2226–4717)       | 73.8% (2.4 to 219.8%)               | 51.5 (34.7–73.7)         | 23.2% (-25 to 115.9%)               |                          |
| Morocco                                 |                                         | Headache disorders     | 49812 (11832–107596)                | 105.3% (90.3 to 140.3%)  | 661.1 (155.4–1425.1)                | 1.3% (-2.2 to 4.6%)      |
|                                         | Meningitis                              | 22079 (15488–30007)    | -82.9% (-89.4 to -74.2%)            | 68.4 (47.7–94.1)         | -82% (-88.5 to -73.2%)              |                          |
|                                         | Encephalitis                            | 8593 (5253–16290)      | -6.2% (-42.2 to 41.4%)              | 26 (15.6–48.9)           | -16.9% (-45.8 to 23.8%)             |                          |
|                                         | Tetanus                                 | 7669 (1916–28940)      | -95% (-98.8 to -80.8%)              | 25.7 (6.3–98.1)          | -93.9% (-98.5 to -76.2%)            |                          |
|                                         | Brain and central nervous system cancer | 19615 (13105–27097)    | 56.9% (-9.5 to 134.5%)              | 55.2 (37.4–74.2)         | 2.6% (-37.2 to 47.8%)               |                          |
|                                         | Stroke*                                 | 666284 (534574–808810) | 72.1% (36.4 to 111.6%)              | 2257.8 (1838.8–2702.5)   | -17.2% (-33.9 to 0.9%)              |                          |
|                                         | Ischaemic stroke                        | 451674 (364060–544462) | 167.3% (107.4 to 225.5%)            | 1603.6 (1305–1921.7)     | 18.5% (-6.7 to 42.2%)               |                          |
|                                         | Intracerebral haemorrhage               | 181455 (138916–232630) | 3.6% (-24.8 to 39.1%)               | 554 (425.3–704.4)        | -51% (-64.1 to -34.3%)              |                          |



**Table S12** Burden, mortality, incidence, and prevalence of neurological conditions in North Africa and Middle East countries

| Measure                                 | Cause                                   | Location                | All Ages                 |                          | Age-standardised        |                          |
|-----------------------------------------|-----------------------------------------|-------------------------|--------------------------|--------------------------|-------------------------|--------------------------|
|                                         |                                         |                         | Number                   | Percent change           | Rate per 100,000        | Percent change           |
|                                         |                                         |                         | 2019                     | From 1990 to 2019        | 2019                    | From 1990 to 2019        |
|                                         |                                         | Mean (95% UI)           | Mean (95% UI)            | Mean (95% UI)            | Mean (95% UI)           |                          |
| Palestine                               | Subarachnoid haemorrhage                |                         | 33155 (23008–48586)      | -23% (-47.9 to 27.2%)    | 100.3 (70.3–143.9)      | -58.6% (-72.4 to -30.7%) |
|                                         | Neurological disorders†                 |                         | 435807 (225061–747805)   | 71.5% (46 to 110.2%)     | 1355.8 (744.6–2284.9)   | 1.9% (-12.1 to 17%)      |
|                                         | Alzheimer's disease and other dementias |                         | 86183 (37096–195521)     | 147% (117.2 to 177.1%)   | 385.8 (166–876.4)       | 0.3% (-10.6 to 11%)      |
|                                         | Parkinson's disease                     |                         | 25269 (20568–29607)      | 221.2% (160.6 to 300.2%) | 96.6 (79.3–111.9)       | 39.6% (14.4 to 73.3%)    |
|                                         | Idiopathic epilepsy                     |                         | 47904 (17349–89938)      | 17.6% (-58.2 to 176.2%)  | 135.2 (48.7–253.5)      | -11.7% (-68.2 to 108.6%) |
|                                         | Multiple sclerosis                      |                         | 7437 (5171–10001)        | 148.6% (94.9 to 227.4%)  | 20.2 (14.1–27)          | 25.1% (-1.6 to 63.3%)    |
|                                         | Migraine                                |                         | 226776 (38690–515523)    | 58.5% (50.7 to 80.5%)    | 601.7 (104.2–1370.5)    | -0.3% (-3.3 to 3%)       |
|                                         | Tension-type headache                   |                         | 24818 (8463–69426)       | 70.5% (47.5 to 93.4%)    | 66.5 (22.7–187.3)       | 0.2% (-9.8 to 8.1%)      |
|                                         | Motor neuron disease                    |                         | 903 (687–1185)           | 130.5% (67.1 to 211.2%)  | 2.5 (1.9–3.2)           | 23.8% (-11.8 to 68%)     |
|                                         | Other neurological disorders            |                         | 16517 (9202–26306)       | 71.6% (-14.5 to 239.1%)  | 47.3 (26.7–75.3)        | 32.3% (-31.9 to 148.1%)  |
|                                         | Headache disorders                      |                         | 251594 (58542–544979)    | 59.6% (51.6 to 78.5%)    | 668.2 (156.2–1445.1)    | -0.2% (-3.6 to 3.1%)     |
|                                         | Meningitis                              |                         | 1996 (1640–2450)         | -75% (-83.4 to -62%)     | 40.5 (34.1–48.3)        | -82.6% (-87.6 to -75.4%) |
|                                         | Encephalitis                            |                         | 824 (642–1137)           | 51.1% (-4.7 to 118.9%)   | 16.3 (13.1–22.1)        | -21.8% (-43.6 to 3.1%)   |
|                                         | Tetanus                                 |                         | 71 (51–106)              | -90.5% (-97.4 to -52.5%) | 1.3 (0.9–1.9)           | -92.7% (-98 to -67.8%)   |
|                                         | Brain and central nervous system cancer |                         | 8903 (6939–11031)        | 114.7% (31.2 to 200.5%)  | 232 (175.6–279.5)       | -9.1% (-39.8 to 24.2%)   |
|                                         | Stroke*                                 |                         | 44902 (39457–50763)      | 63.5% (29.3 to 104.3%)   | 2128.3 (1878.2–2399.7)  | -32.5% (-46.4 to -15%)   |
|                                         | Ischaemic stroke                        |                         | 31202 (27203–35384)      | 101.3% (59.7 to 150.7%)  | 1590.9 (1386.2–1793.7)  | -17.8% (-34.6 to 3%)     |
|                                         | Intracerebral haemorrhage               |                         | 12183 (10390–14189)      | 11.2% (-14.1 to 46.7%)   | 487.3 (416.5–568.3)     | -56.7% (-66.5 to -43%)   |
|                                         | Subarachnoid haemorrhage                |                         | 1516 (1277–1778)         | 49.3% (10.4 to 117.4%)   | 50.1 (42.3–59)          | -46% (-61.6 to -22.2%)   |
|                                         | Oman                                    | Neurological disorders† |                          | 50324 (24673–87487)      | 142.1% (92.8 to 184.1%) | 1376 (773.8–2255.8)      |
| Alzheimer's disease and other dementias |                                         |                         | 5818 (2538–13511)        | 117.2% (87 to 155.6%)    | 388 (170.4–895.9)       | -4.4% (-17 to 12%)       |
| Parkinson's disease                     |                                         |                         | 1614 (1142–1855)         | 127.5% (75.6 to 210.6%)  | 93.1 (64.9–106.8)       | -4.9% (-26.4 to 29.1%)   |
| Idiopathic epilepsy                     |                                         |                         | 8232 (4516–13294)        | 69.8% (-11.5 to 223.1%)  | 163.6 (91.1–262.6)      | -24.2% (-60.6 to 43.1%)  |
| Multiple sclerosis                      |                                         |                         | 726 (572–901)            | 239.9% (151.8 to 357.1%) | 19.5 (15.3–24.3)        | 8.5% (-18.1 to 44.4%)    |
| Migraine                                |                                         |                         | 28492 (4390–66341)       | 177.7% (166.5 to 199.2%) | 596.1 (102.5–1357.3)    | -1.1% (-4.1 to 1.9%)     |
| Tension-type headache                   |                                         |                         | 2914 (952–8613)          | 187.4% (144.1 to 219.3%) | 66.2 (22.1–187.5)       | -0.3% (-13 to 9.3%)      |
| Motor neuron disease                    |                                         |                         | 84 (69–102)              | 216.8% (132.7 to 328.8%) | 2.1 (1.7–2.5)           | 31.7% (-8.3 to 85.9%)    |
| Other neurological disorders            |                                         |                         | 2443 (1404–3855)         | 134.8% (25.7 to 342.6%)  | 47.5 (29.7–71.6)        | 13.9% (-34 to 103.6%)    |
| Headache disorders                      |                                         |                         | 31406 (6765–70639)       | 178.6% (166.2 to 198.3%) | 662.3 (157.1–1439.2)    | -1% (-4.4 to 2.1%)       |
| Meningitis                              |                                         |                         | 708 (600–870)            | -63.1% (-74.1 to -46.1%) | 24.5 (20.8–29.5)        | -73.9% (-80.2 to -63.3%) |
| Encephalitis                            |                                         |                         | 4505 (3291–7755)         | 7.8% (-31.4 to 67.1%)    | 122.1 (94–180.3)        | -44.1% (-62.4 to -14.1%) |
| Tetanus                                 |                                         |                         | 40 (32–50)               | -79.7% (-93.8 to -19.4%) | 1 (0.7–1.3)             | -90.3% (-96.7 to -62.2%) |
| Brain and central nervous system cancer |                                         |                         | 2520 (1453–3280)         | 151.6% (26.6 to 282.6%)  | 72.6 (43.8–91.3)        | 11% (-44.4 to 65.5%)     |
| Stroke*                                 |                                         |                         | 30859 (27010–36651)      | 26.6% (-0.4 to 64.9%)    | 1884.3 (1667.3–2127.1)  | -38.7% (-51.9 to -20.7%) |
| Ischaemic stroke                        |                                         |                         | 17267 (14836–19890)      | 79.5% (38.7 to 135.1%)   | 1291.3 (1116.3–1468.2)  | -18.3% (-35.2 to 6.7%)   |
| Intracerebral haemorrhage               |                                         |                         | 10843 (9315–13404)       | -1.9% (-25.1 to 32.7%)   | 504.1 (437.1–621.6)     | -59.8% (-69.5 to -46.5%) |
| Subarachnoid haemorrhage                |                                         |                         | 2749 (1961–4314)         | -25.7% (-54.9 to 55.5%)  | 88.9 (59.7–133.6)       | -62.4% (-76.8 to -29.6%) |
| Neurological disorders†                 |                                         |                         | 43187 (18527–79809)      | 167.7% (114.1 to 223.1%) | 1340.6 (758.2–2231.2)   | 1% (-12.7 to 19.5%)      |
| Alzheimer's disease and other dementias |                                         |                         | 3313 (1388–7765)         | 126.2% (93.7 to 183.8%)  | 422 (179.8–967.9)       | -3.3% (-16.4 to 26.2%)   |
| Parkinson's disease                     |                                         | 1097 (785–1265)         | 168.6% (99.7 to 253.4%)  | 125.3 (79–144.5)         | 30.3% (-2.2 to 70.4%)   |                          |
| Idiopathic epilepsy                     |                                         | 4544 (1615–9015)        | 91.1% (-38.5 to 468.1%)  | 107.8 (37.2–214.7)       | -9.8% (-70.4 to 160.3%) |                          |
| Multiple sclerosis                      |                                         | 728 (501–973)           | 301.1% (176.6 to 453.3%) | 17.1 (11.6–23.2)         | 20.3% (-15.8 to 68.5%)  |                          |
| Migraine                                |                                         | 28437 (4879–64400)      | 185% (166.5 to 226.5%)   | 554.2 (98.7–1256.8)      | -1.4% (-4.5 to 1.9%)    |                          |

**Table S12** Burden, mortality, incidence, and prevalence of neurological conditions in North Africa and Middle East countries

| Measure                                 |                                         | All Ages               |                            | Age-standardised        |                          |
|-----------------------------------------|-----------------------------------------|------------------------|----------------------------|-------------------------|--------------------------|
|                                         |                                         | Number                 | Percent change             | Rate per 100,000        | Percent change           |
|                                         |                                         | 2019                   | From 1990 to 2019          | 2019                    | From 1990 to 2019        |
| Cause                                   | Location                                | Mean (95% UI)          | Mean (95% UI)              | Mean (95% UI)           | Mean (95% UI)            |
| Qatar                                   | Tension-type headache                   | 3196 (1042–8985)       | 208.1% (154.1 to 256.4%)   | 64.3 (21.6–190.1)       | 0% (-15.4 to 10.8%)      |
|                                         | Motor neuron disease                    | 100 (68–130)           | 208.9% (89.5 to 344.2%)    | 3.2 (1.9–4.4)           | 17.5% (-32.8 to 84.6%)   |
|                                         | Other neurological disorders            | 1771 (1005–2906)       | 171.8% (39.3 to 463.2%)    | 46.8 (27.9–75.1)        | 43.2% (-21.9 to 164.3%)  |
|                                         | Headache disorders                      | 31633 (7474–67794)     | 187.2% (168.1 to 223.2%)   | 618.5 (146.4–1332.9)    | -1.2% (-4.9 to 2.6%)     |
|                                         | Meningitis                              | 516 (413–641)          | 34.9% (-9.8 to 93.7%)      | 25.4 (20.7–31.2)        | -73.1% (-81.8 to -62.7%) |
|                                         | Encephalitis                            | 279 (207–394)          | 264.1% (136.5 to 425.7%)   | 13.3 (9.9–17.6)         | -29.3% (-52.7 to 0.9%)   |
|                                         | Tetanus                                 | 17 (13–23)             | 195.2% (8.4 to 463.3%)     | 0.7 (0.5–1)             | -50.2% (-83.3 to 5%)     |
|                                         | Brain and central nervous system cancer | 1692 (1130–2801)       | 433.1% (209 to 716.6%)     | 85.5 (61.1–128.4)       | -20.3% (-53.1 to 20.6%)  |
|                                         | Stroke*                                 | 8998 (7254–11097)      | 256.6% (174.3 to 355.9%)   | 904.5 (747.6–1130.3)    | -44.7% (-57.5 to -29.5%) |
|                                         | Ischaemic stroke                        | 3791 (2990–4599)       | 333.4% (238.6 to 427.2%)   | 577.3 (476.3–725)       | -35.5% (-49.9 to -19.3%) |
|                                         | Intracerebral haemorrhage               | 3518 (2730–4574)       | 205.4% (117.4 to 322.7%)   | 243.6 (195.1–315.2)     | -56.3% (-67.8 to -41.8%) |
|                                         | Subarachnoid haemorrhage                | 1689 (1246–2192)       | 240% (109.5 to 413.8%)     | 83.6 (62.6–109.6)       | -54.2% (-72.3 to -26.8%) |
|                                         | Neurological disorders†                 | 26834 (11350–50198)    | 546.8% (399.9 to 684.3%)   | 1344.2 (754.1–2196)     | -2.2% (-17.2 to 16.1%)   |
|                                         | Alzheimer's disease and other dementias | 1203 (489–2863)        | 600% (460.9 to 778.2%)     | 407.2 (171.7–948.7)     | 3.4% (-11.6 to 19.9%)    |
|                                         | Parkinson's disease                     | 488 (360–643)          | 517% (361.6 to 711.4%)     | 148.6 (96–194.6)        | 14.8% (-11.6 to 49.8%)   |
|                                         | Idiopathic epilepsy                     | 3147 (1212–6098)       | 326.2% (61.4 to 1037%)     | 126.5 (47.7–250.5)      | -28.2% (-73.2 to 94.6%)  |
|                                         | Multiple sclerosis                      | 540 (388–720)          | 1040.4% (822.7 to 1331.2%) | 16.8 (12.3–21.8)        | 33.7% (10.4 to 61.8%)    |
|                                         | Migraine                                | 18109 (3233–40461)     | 601.2% (567.3 to 669.2%)   | 523 (94.3–1174.9)       | -2.7% (-6.2 to 0.8%)     |
|                                         | Saudi Arabia                            | Tension-type headache  | 2135 (699–6004)            | 643.8% (552 to 739.5%)  | 62 (20.7–184.7)          |
| Motor neuron disease                    |                                         | 50 (39–64)             | 619.8% (433 to 857.2%)     | 2.1 (1.6–2.7)           | -4.8% (-34.3 to 34.6%)   |
| Other neurological disorders            |                                         | 1162 (702–1855)        | 393.3% (181.8 to 777.7%)   | 57.8 (36.9–87)          | -3.3% (-42.3 to 67.3%)   |
| Headache disorders                      |                                         | 20244 (5008–42949)     | 605.4% (571.7 to 667.4%)   | 585 (140.4–1252)        | -2.6% (-5.8 to 0.9%)     |
| Meningitis                              |                                         | 8491 (6565–11135)      | -41.8% (-56.5 to -19.7%)   | 26.7 (21.3–33.5)        | -73.3% (-79.4 to -63.2%) |
| Encephalitis                            |                                         | 9462 (7139–12792)      | 2.3% (-28.7 to 51.7%)      | 28.2 (21.6–37.8)        | -53% (-68.2 to -29.9%)   |
| Tetanus                                 |                                         | 749 (246–1293)         | -94.2% (-99.2 to -68.2%)   | 2.1 (0.8–3.5)           | -96.5% (-99.4 to -81.2%) |
| Brain and central nervous system cancer |                                         | 26453 (19219–39839)    | 250.7% (91.7 to 558.9%)    | 79.4 (59.2–120.9)       | 32.3% (-29.6 to 148.9%)  |
| Stroke*                                 |                                         | 417599 (326188–509857) | 129% (67.6 to 211.5%)      | 2114.9 (1685.1–2485.5)  | -29.1% (-46.4 to -5.6%)  |
| Ischaemic stroke                        |                                         | 207936 (160132–249405) | 153.3% (90.1 to 234.4%)    | 1300.8 (1026.9–1516.1)  | -17.4% (-36.3 to 5.8%)   |
| Intracerebral haemorrhage               |                                         | 192664 (149104–243126) | 113.8% (51 to 215.6%)      | 764.7 (597–929.3)       | -41.3% (-57.6 to -15.5%) |
| Subarachnoid haemorrhage                |                                         | 16999 (12299–22487)    | 66.7% (-0.4 to 170.7%)     | 49.5 (36.1–64.1)        | -52.5% (-71.9 to -22.6%) |
| Neurological disorders†                 |                                         | 410451 (195196–722127) | 160.3% (106.3 to 223.5%)   | 1428.4 (794.9–2355.6)   | 0.1% (-16.7 to 20.3%)    |
| Alzheimer's disease and other dementias |                                         | 32530 (13935–72984)    | 122.7% (86.3 to 186.1%)    | 389.7 (168.5–863.1)     | -2% (-15.8 to 26.4%)     |
| Parkinson's disease                     |                                         | 11587 (9409–13541)     | 145.8% (88.1 to 247.9%)    | 111 (83.8–129.8)        | 1.6% (-19.9 to 43.5%)    |
| Idiopathic epilepsy                     |                                         | 81357 (40168–137978)   | 128.5% (4.1 to 416.5%)     | 226.7 (107.8–394.2)     | -0.3% (-56.7 to 123.2%)  |
| Multiple sclerosis                      |                                         | 4558 (3316–5953)       | 357.9% (248.8 to 567.7%)   | 11.7 (8.7–15)           | 23% (-5 to 77%)          |
| Migraine                                |                                         | 234239 (41410–528197)  | 176.4% (152.8 to 229.1%)   | 562 (99.4–1276.9)       | -1.2% (-5.9 to 3.8%)     |
| Tension-type headache                   |                                         | 25584 (9050–70083)     | 202% (136.9 to 255%)       | 63 (22–180.3)           | -0.3% (-18.6 to 10.8%)   |
| Motor neuron disease                    | 941 (676–1306)                          | 226.6% (85 to 448%)    | 3.1 (2.2–4.2)              | 18.7% (-35 to 116%)     |                          |
| Other neurological disorders            | 19655 (10586–32871)                     | 138.3% (11.4 to 384%)  | 61.3 (34.4–101.1)          | 27.1% (-37.2 to 145.4%) |                          |
| Syrian Arab Republic                    | Headache disorders                      | 259823 (62718–548786)  | 178.7% (155.8 to 227.9%)   | 625 (149.7–1343.4)      | -1.1% (-6.2 to 3.8%)     |
|                                         | Meningitis                              | 13469 (10405–17156)    | -80.1% (-86.4 to -71.2%)   | 100 (76.6–129.5)        | -70.7% (-79.4 to -58.5%) |
|                                         | Encephalitis                            | 3715 (2866–4881)       | -52.8% (-70.3 to -17.7%)   | 27.4 (21.1–36.6)        | -41% (-61.4 to -1.9%)    |
|                                         | Tetanus                                 | 307 (169–626)          | -97.6% (-99.2 to -89.5%)   | 2.4 (1.3–5)             | -95.6% (-98.6 to -81.4%) |

**Table S12** Burden, mortality, incidence, and prevalence of neurological conditions in North Africa and Middle East countries

| Measure                                 | Cause                                   | Location                                | All Ages                 |                          | Age-standardised        |                          |                        |
|-----------------------------------------|-----------------------------------------|-----------------------------------------|--------------------------|--------------------------|-------------------------|--------------------------|------------------------|
|                                         |                                         |                                         | Number                   | Percent change           | Rate per 100,000        | Percent change           |                        |
|                                         |                                         |                                         | 2019                     | From 1990 to 2019        | 2019                    | From 1990 to 2019        |                        |
|                                         |                                         | Mean (95% UI)                           | Mean (95% UI)            | Mean (95% UI)            | Mean (95% UI)           |                          |                        |
| Tunisia                                 | Brain and central nervous system cancer |                                         | 20391 (14676–27540)      | 34.4% (-23 to 107.6%)    | 144.8 (104.7–194.1)     | -6.8% (-38.4 to 37.2%)   |                        |
|                                         | Stroke*                                 |                                         | 238333 (184920–304410)   | -5.7% (-29.3 to 27.5%)   | 2018.1 (1589.6–2547.1)  | -40.2% (-55.3 to -19.9%) |                        |
|                                         | Ischaemic stroke                        |                                         | 116537 (92554–145609)    | 43.2% (7.6 to 90.1%)     | 1069.9 (858.8–1325.1)   | -25.1% (-44.7 to -2.2%)  |                        |
|                                         | Intracerebral haemorrhage               |                                         | 106469 (80729–141598)    | -11.4% (-36.4 to 24.2%)  | 839 (646.4–1101.7)      | -48.5% (-62.7 to -28.8%) |                        |
|                                         | Subarachnoid haemorrhage                |                                         | 15327 (11694–19102)      | -70.1% (-80 to -49.5%)   | 109.2 (84.6–135.2)      | -65.7% (-76 to -47.7%)   |                        |
|                                         | Neurological disorders†                 |                                         | 165257 (80674–293562)    | 43.5% (20.1 to 79.2%)    | 1327.1 (692.4–2305.8)   | 1.4% (-11.9 to 16.8%)    |                        |
|                                         | Alzheimer's disease and other dementias |                                         | 30688 (13248–70349)      | 112% (74.2 to 170.1%)    | 391.1 (167–907.7)       | 2.9% (-14 to 29.8%)      |                        |
|                                         | Parkinson's disease                     |                                         | 7787 (5490–9816)         | 157.5% (96.9 to 243.4%)  | 83.9 (58.4–104.9)       | 13.7% (-12.2 to 49.7%)   |                        |
|                                         | Idiopathic epilepsy                     |                                         | 15874 (6769–28704)       | -10.5% (-65.7 to 124.2%) | 109.2 (47–198.2)        | -17.2% (-67.5 to 102.6%) |                        |
|                                         | Multiple sclerosis                      |                                         | 2153 (1605–2776)         | 118.3% (77.3 to 168.1%)  | 15.2 (11.3–19.6)        | 15.4% (-5.9 to 40.2%)    |                        |
|                                         | Migraine                                |                                         | 91621 (15453–212202)     | 39.1% (31.2 to 62.3%)    | 609.9 (105.1–1394.5)    | 1.7% (-1.9 to 5.2%)      |                        |
|                                         | Tension-type headache                   |                                         | 9810 (3361–28381)        | 51.2% (24.9 to 78.8%)    | 67 (22.9–189.7)         | 1.1% (-10.5 to 9.5%)     |                        |
|                                         | Motor neuron disease                    |                                         | 424 (278–650)            | 106.2% (31 to 220.1%)    | 2.9 (1.9–4.4)           | 23.9% (-21.2 to 93.2%)   |                        |
|                                         | Other neurological disorders            |                                         | 6900 (4257–10445)        | 8% (-40.5 to 96.8%)      | 48 (30.5–71.5)          | 14.1% (-34.4 to 96.1%)   |                        |
|                                         | Headache disorders                      |                                         | 101431 (22875–223796)    | 40.2% (32.3 to 61.8%)    | 676.9 (157.1–1474.2)    | 1.7% (-2.1 to 5.1%)      |                        |
|                                         | Meningitis                              |                                         | 4056 (3030–5173)         | -76.3% (-84.4 to -64.1%) | 37.9 (28.2–48.2)        | -77.1% (-84.8 to -66.2%) |                        |
|                                         | Encephalitis                            |                                         | 1987 (1319–3724)         | -18.8% (-49.5 to 18.9%)  | 18.4 (12.1–34.4)        | -28.7% (-54.5 to 2.7%)   |                        |
|                                         | Tetanus                                 |                                         | 106 (70–195)             | -83.7% (-94 to -56.6%)   | 1 (0.7–1.8)             | -83.8% (-94 to -57.1%)   |                        |
|                                         | Türkiye                                 | Brain and central nervous system cancer |                          | 5077 (3366–6958)         | 44.3% (-15.1 to 113.1%) | 41.8 (27.6–57.1)         | -5.4% (-42.2 to 37.8%) |
|                                         |                                         | Stroke*                                 |                          | 176891 (135395–225499)   | 83.2% (38.9 to 138.2%)  | 1477.5 (1138.5–1875)     | -24.7% (-42.8 to -2%)  |
| Ischaemic stroke                        |                                         |                                         | 128086 (98885–163158)    | 178.2% (108.2 to 261.1%) | 1090.4 (848.4–1382.7)   | 4.1% (-22 to 34.2%)      |                        |
| Intracerebral haemorrhage               |                                         |                                         | 40607 (29901–53483)      | 2.1% (-27.6 to 42.4%)    | 322.5 (238.9–422.5)     | -56.5% (-69.3 to -38.5%) |                        |
| Subarachnoid haemorrhage                |                                         |                                         | 8198 (5771–11166)        | -23.9% (-51.2 to 27.2%)  | 64.5 (45.6–88.2)        | -62.6% (-76.7 to -38.2%) |                        |
| Neurological disorders†                 |                                         |                                         | 154375 (80217–263164)    | 74.3% (47.6 to 117.8%)   | 1332.6 (699.8–2234.9)   | -2.1% (-15.5 to 11.4%)   |                        |
| Alzheimer's disease and other dementias |                                         |                                         | 42020 (18281–94965)      | 212.4% (160 to 293.7%)   | 400.1 (174.9–889.4)     | -2% (-17 to 21.4%)       |                        |
| Parkinson's disease                     |                                         |                                         | 8271 (6418–10676)        | 205.8% (138.1 to 290.2%) | 72.7 (56.2–93.7)        | 11.1% (-13.8 to 41%)     |                        |
| Idiopathic epilepsy                     |                                         |                                         | 13345 (6574–23467)       | -11.9% (-58.9 to 78.9%)  | 119.5 (58.8–210.4)      | -26.5% (-66.1 to 50.4%)  |                        |
| Multiple sclerosis                      |                                         |                                         | 2938 (2061–3853)         | 158.7% (103.5 to 228.3%) | 22.2 (15.5–29.2)        | 25.6% (1 to 58.9%)       |                        |
| Migraine                                |                                         |                                         | 74318 (13231–168600)     | 54.9% (45.1 to 82.1%)    | 606.3 (104.4–1382.7)    | 0.3% (-2.6 to 3.4%)      |                        |
| Tension-type headache                   |                                         |                                         | 8414 (2880–23528)        | 70.6% (42.7 to 97.2%)    | 67 (22.6–192.5)         | 0.7% (-10.7 to 8.5%)     |                        |
| Motor neuron disease                    |                                         |                                         | 346 (249–473)            | 115.1% (41.1 to 224.9%)  | 2.7 (2–3.6)             | 15.9% (-24 to 76.4%)     |                        |
| Other neurological disorders            |                                         |                                         | 4722 (2962–7075)         | 56.2% (-11.3 to 182.6%)  | 42 (25.4–65.3)          | 24.4% (-29.8 to 119.4%)  |                        |
| Headache disorders                      |                                         |                                         | 82732 (20234–176614)     | 56.3% (46.6 to 81.3%)    | 673.3 (158.7–1448.7)    | 0.3% (-3.1 to 3.5%)      |                        |
| Meningitis                              |                                         |                                         | 17218 (14424–20635)      | -90.8% (-94.3 to -85.7%) | 25.9 (21.4–31.9)        | -89.9% (-93.7 to -84.5%) |                        |
| Encephalitis                            |                                         |                                         | 13246 (10795–15985)      | -42.9% (-64.2 to -15%)   | 18.6 (14.9–22.9)        | -47.4% (-66.5 to -22.2%) |                        |
| Tetanus                                 |                                         |                                         | 711 (543–962)            | -98% (-98.9 to -94.1%)   | 1 (0.8–1.4)             | -98.3% (-99 to -95.5%)   |                        |
| Brain and central nervous system cancer |                                         |                                         | 132889 (63488–183730)    | 24.5% (-34.5 to 93.9%)   | 158.3 (76.7–215.5)      | -20.4% (-55.4 to 19.1%)  |                        |
| Stroke*                                 |                                         |                                         | 993082 (820881–1177528)  | 75.3% (32.7 to 117%)     | 1162.6 (965–1380.4)     | -23.5% (-42.5 to -5.2%)  |                        |
| Ischaemic stroke                        |                                         | 551064 (459967–649248)                  | 133.2% (71.4 to 186.1%)  | 662.7 (552.9–779.5)      | -8% (-32.7 to 14.3%)    |                          |                        |
| Intracerebral haemorrhage               |                                         | 350826 (284141–427496)                  | 37% (0.3 to 74.7%)       | 399 (323.7–485.6)        | -36.9% (-54.1 to -20%)  |                          |                        |
| Subarachnoid haemorrhage                |                                         | 91192 (72042–114240)                    | 22.8% (-22 to 111.1%)    | 100.9 (80–125.8)         | -39.9% (-61.8 to 5.4%)  |                          |                        |
| Neurological disorders†                 |                                         | 1231991 (709138–2000451)                | 49.8% (23 to 84.9%)      | 1477.4 (862.5–2368.4)    | -8.7% (-22.9 to 6.2%)   |                          |                        |
| Alzheimer's disease and other dementias |                                         | 313664 (142254–713153)                  | 182.1% (142.9 to 226.4%) | 395.4 (179.6–892.7)      | -2% (-15.1 to 12.9%)    |                          |                        |



**Table S12** Burden, mortality, incidence, and prevalence of neurological conditions in North Africa and Middle East countries

| Measure                                 | Cause                                   | Location                 | All Ages                 |                           | Age-standardised         |                          |                          |
|-----------------------------------------|-----------------------------------------|--------------------------|--------------------------|---------------------------|--------------------------|--------------------------|--------------------------|
|                                         |                                         |                          | Number                   | Percent change            | Rate per 100,000         | Percent change           |                          |
|                                         |                                         |                          | 2019                     | From 1990 to 2019         | 2019                     | From 1990 to 2019        |                          |
|                                         |                                         | Mean (95% UI)            | Mean (95% UI)            | Mean (95% UI)             | Mean (95% UI)            |                          |                          |
| United Arab Emirates                    | Parkinson's disease                     |                          | 62178 (48654–105236)     | 147·6% (97·6 to 201·9%)   | 76·1 (59·4–129·7)        | -8·2% (-25·9 to 11·9%)   |                          |
|                                         | Idiopathic epilepsy                     |                          | 162977 (83748–270865)    | -19·8% (-60·9 to 58·6%)   | 213·7 (113·7–354·5)      | -30·4% (-65·1 to 38·4%)  |                          |
|                                         | Multiple sclerosis                      |                          | 19425 (15255–24609)      | 68·9% (7 to 127·5%)       | 21 (16·3–27·6)           | -11·8% (-37·6 to 20%)    |                          |
|                                         | Migraine                                |                          | 528078 (101819–1197352)  | 56·6% (45·4 to 81·9%)     | 589·6 (110·2–1340·7)     | 0·2% (-4·5 to 5·2%)      |                          |
|                                         | Tension-type headache                   |                          | 60666 (21747–160117)     | 71·5% (44·9 to 93·8%)     | 66·6 (23·6–180)          | 0·8% (-10 to 10·1%)      |                          |
|                                         | Motor neuron disease                    |                          | 23574 (18647–29385)      | -14·4% (-54·1 to 51·4%)   | 31·7 (24·6–40·4)         | -25% (-58 to 20·9%)      |                          |
|                                         | Other neurological disorders            |                          | 61429 (42698–84967)      | -13·6% (-43·8 to 34·7%)   | 83·4 (57·4–117·1)        | -20·8% (-48·4 to 20·7%)  |                          |
|                                         | Headache disorders                      |                          | 588744 (155386–1275312)  | 58% (47·2 to 81%)         | 656·1 (167·7–1433)       | 0·3% (-4·6 to 5%)        |                          |
|                                         | Meningitis                              |                          | 2834 (1849–4062)         | 26·4% (-21·2 to 80·3%)    | 32·1 (22·2–43·8)         | -73·9% (-81·3 to -65·7%) |                          |
|                                         | Encephalitis                            |                          | 1474 (881–2971)          | 225·1% (113·7 to 388%)    | 18·4 (11·9–34·1)         | -19·5% (-44·4 to 18%)    |                          |
|                                         | Tetanus                                 |                          | 1060 (485–1742)          | -8% (-83·2 to 209·2%)     | 33·2 (8·4–54·9)          | -86% (-96·4 to -46·5%)   |                          |
|                                         | Brain and central nervous system cancer |                          | 14328 (8218–21137)       | 462% (270·9 to 714·7%)    | 151·5 (91·5–206·7)       | -10·7% (-45·3 to 30·6%)  |                          |
|                                         | Stroke*                                 |                          | 95518 (70890–128945)     | 416·5% (265·8 to 618·4%)  | 1925·6 (1517–2457·9)     | -46% (-58·5 to -30·5%)   |                          |
|                                         | Ischaemic stroke                        |                          | 54428 (41443–69792)      | 620·9% (416·4 to 889·1%)  | 1415·2 (1128·2–1749·3)   | -33·9% (-48·7 to -15·7%) |                          |
|                                         | Intracerebral haemorrhage               |                          | 35021 (23807–53069)      | 294·6% (149·3 to 494·6%)  | 449·8 (317·9–664·8)      | -64·1% (-75·4 to -49·2%) |                          |
|                                         | Yemen                                   | Subarachnoid haemorrhage |                          | 6068 (3360–9834)          | 193·2% (77·1 to 409·8%)  | 60·6 (33·3–95·3)         | -64·4% (-76·8 to -43·5%) |
|                                         |                                         | Neurological disorders†  |                          | 104945 (51493–182388)     | 439·5% (320·2 to 578·7%) | 1432 (843·2–2254·4)      | -6·4% (-24·3 to 12%)     |
| Alzheimer's disease and other dementias |                                         |                          | 4085 (1620–9979)         | 607·7% (462·1 to 810·2%)  | 366·1 (157·8–831)        | -5·4% (-17·1 to 14·2%)   |                          |
| Parkinson's disease                     |                                         |                          | 2896 (2100–3866)         | 716·5% (504·6 to 1058·9%) | 130·5 (87–167·2)         | -10·6% (-29·6 to 21·4%)  |                          |
| Idiopathic epilepsy                     |                                         |                          | 18904 (8991–30669)       | 253·5% (60·3 to 637%)     | 216·3 (98·8–364·2)       | -28·2% (-69·6 to 62·2%)  |                          |
| Multiple sclerosis                      |                                         |                          | 2827 (1713–4429)         | 935·7% (601·3 to 1345·8%) | 20·6 (12·3–32·5)         | 19% (-16·5 to 59·7%)     |                          |
| Migraine                                |                                         |                          | 60153 (11995–134011)     | 473% (424 to 588·1%)      | 535·6 (97·8–1203·7)      | -0·7% (-4·3 to 3·1%)     |                          |
| Tension-type headache                   |                                         |                          | 7426 (2396–20517)        | 542·2% (427·1 to 676·1%)  | 63·2 (20·7–187·8)        | 0% (-12·6 to 8·9%)       |                          |
| Motor neuron disease                    |                                         |                          | 561 (258–1065)           | 961·7% (388 to 1953·3%)   | 5·9 (2·6–11·2)           | 21·9% (-44·4 to 124·6%)  |                          |
| Other neurological disorders            |                                         |                          | 8094 (5181–11697)        | 577·3% (281·2 to 1086·5%) | 93·8 (59·5–135·8)        | 31% (-23·2 to 121·3%)    |                          |
| Headache disorders                      |                                         |                          | 67579 (17571–141865)     | 479·9% (432·5 to 583%)    | 598·8 (142·4–1275·1)     | -0·7% (-5 to 3%)         |                          |
| Meningitis                              |                                         |                          | 33109 (22291–48225)      | -55·4% (-71·8 to -29·7%)  | 97·4 (68·3–136·9)        | -68·5% (-78·6 to -54·1%) |                          |
| Encephalitis                            |                                         |                          | 11411 (6705–21416)       | 52·7% (-12·4 to 168·5%)   | 31·3 (19·4–57·9)         | -7·1% (-41·7 to 47·1%)   |                          |
| Tetanus                                 |                                         |                          | 4196 (1662–8780)         | -85·7% (-95·7 to -34·5%)  | 11·2 (5–23·3)            | -89·9% (-96·5 to -61·6%) |                          |
| Brain and central nervous system cancer |                                         |                          | 31600 (18698–46415)      | 137% (23·7 to 365·4%)     | 123·3 (74·9–181·5)       | 15·2% (-35·9 to 99·7%)   |                          |
| Stroke*                                 |                                         |                          | 388486 (302567–500074)   | 88·5% (44 to 152·4%)      | 2765·5 (2161·6–3520·5)   | -24·5% (-41 to -1·9%)    |                          |
| Ischaemic stroke                        |                                         |                          | 212195 (168265–276241)   | 232·1% (159·4 to 334·1%)  | 1716·7 (1370·2–2197·1)   | 19·8% (-4·2 to 51·1%)    |                          |
| Intracerebral haemorrhage               |                                         | 146684 (108214–195409)   | 25% (-9·2 to 75·9%)      | 884·3 (663·2–1178·9)      | -53·7% (-65·8 to -36·8%) |                          |                          |
| Subarachnoid haemorrhage                |                                         | 29608 (15705–48366)      | 18·9% (-19·5 to 104·4%)  | 164·5 (87·2–275·6)        | -48·9% (-63·9 to -20%)   |                          |                          |
| Neurological disorders†                 |                                         | 298357 (137796–541512)   | 137·1% (81·9 to 190·8%)  | 1324·5 (723·4–2244·2)     | -2·7% (-15·4 to 12·6%)   |                          |                          |
| Alzheimer's disease and other dementias |                                         | 31778 (13661–72000)      | 202% (163·7 to 252·4%)   | 383·7 (166–893·1)         | -0·4% (-11·5 to 14·1%)   |                          |                          |
| Parkinson's disease                     |                                         | 8163 (6383–10687)        | 216·7% (147·7 to 319·7%) | 76·8 (60·8–98·7)          | 15·5% (-7·8 to 49·7%)    |                          |                          |
| Idiopathic epilepsy                     |                                         | 49541 (26539–81681)      | 41·5% (-27·2 to 217·2%)  | 147·6 (78·5–243·3)        | -27·4% (-62·7 to 53%)    |                          |                          |
| Multiple sclerosis                      |                                         | 3096 (1957–4548)         | 266·8% (156·3 to 435·7%) | 14·1 (9·2–19·6)           | 26·4% (-9·6 to 72·1%)    |                          |                          |
| Migraine                                |                                         | 175369 (26571–404422)    | 169% (158·9 to 186·6%)   | 596·7 (104·2–1356·8)      | 0·1% (-2·9 to 3·2%)      |                          |                          |
| Tension-type headache                   |                                         | 17617 (5766–51725)       | 176·7% (140 to 209·4%)   | 66·1 (22·8–185·6)         | 0·6% (-11·1 to 9·8%)     |                          |                          |
| Motor neuron disease                    |                                         | 396 (300–514)            | 196·5% (107·9 to 322·1%) | 1·8 (1·3–2·5)             | 19·9% (-23·6 to 83·1%)   |                          |                          |
| Other neurological disorders            |                                         | 12397 (6185–21451)       | 140·2% (8·3 to 487·5%)   | 37·9 (21·8–61·2)          | 20·1% (-39·2 to 161·1%)  |                          |                          |

**Table S12** Burden, mortality, incidence, and prevalence of neurological conditions in North Africa and Middle East countries

|                                         |                                         | All Ages                  |                          | Age-standardised         |                          |
|-----------------------------------------|-----------------------------------------|---------------------------|--------------------------|--------------------------|--------------------------|
| Measure                                 | Location                                | Number                    | Percent change           | Rate per 100,000         | Percent change           |
|                                         |                                         | 2019                      | From 1990 to 2019        | 2019                     | From 1990 to 2019        |
| Cause                                   |                                         | Mean (95% UI)             | Mean (95% UI)            | Mean (95% UI)            | Mean (95% UI)            |
| Afghanistan                             | Headache disorders                      | 192986 (40627–431548)     | 169.7% (159.4 to 187.2%) | 662.8 (157.9–1435.6)     | 0.1% (-3.4 to 3.6%)      |
|                                         | Meningitis                              | 121279 (88624–171666)     | -30.5% (-55 to 6.9%)     | 244.7 (184.6–325.7)      | -73.6% (-82.1 to -62.4%) |
|                                         | Encephalitis                            | 60188 (39100–116114)      | 156.9% (74 to 263.1%)    | 175.8 (131.7–248.4)      | -14.2% (-38.4 to 17.5%)  |
|                                         | Tetanus                                 | 58111 (32892–101654)      | -74.6% (-88.5 to -32.2%) | 113.9 (70.5–179.3)       | -90.2% (-94.9 to -79.6%) |
|                                         | Brain and central nervous system cancer | 54529 (29084–95999)       | 152.7% (57 to 371.2%)    | 176 (99.6–323.9)         | -5.8% (-38.6 to 56%)     |
|                                         | Stroke*                                 | 507837 (375947–659772)    | 56.3% (20.5 to 98.4%)    | 3498.2 (2508.8–4500.4)   | -21.8% (-39.4 to -3.6%)  |
|                                         | Ischaemic stroke                        | 224570 (170361–298131)    | 135.5% (80.7 to 197.7%)  | 1865.5 (1381.8–2444.2)   | 27.3% (-0.6 to 58.5%)    |
|                                         | Intracerebral haemorrhage               | 241903 (176658–324979)    | 22.9% (-7.3 to 64.9%)    | 1397.7 (991–1864.5)      | -46% (-59.2 to -29.6%)   |
|                                         | Subarachnoid haemorrhage                | 41364 (13929–70872)       | 26% (-12.4 to 98.7%)     | 235 (76.3–400.7)         | -43.8% (-59.4 to -14.3%) |
|                                         | Neurological disorders†                 | 382680 (190210–668251)    | 154.8% (86.6 to 226.8%)  | 1503 (853.8–2492.1)      | -10.1% (-23.8 to 4.4%)   |
|                                         | Alzheimer's disease and other dementias | 30938 (12731–73803)       | 52.6% (31.4 to 71.9%)    | 432.7 (179–1002)         | -3.7% (-15.3 to 6.8%)    |
|                                         | Parkinson's disease                     | 11574 (8845–14866)        | 52.5% (18.5 to 92.8%)    | 113.8 (88.7–143.3)       | -6% (-25.7 to 16.3%)     |
|                                         | Idiopathic epilepsy                     | 94040 (50171–142571)      | 88% (10.5 to 308.6%)     | 224.7 (120.4–348.1)      | -38.8% (-64.2 to 28.3%)  |
|                                         | Multiple sclerosis                      | 6575 (3900–12354)         | 237.7% (138 to 395.7%)   | 27.1 (16.8–48.7)         | 10.9% (-21.5 to 51.8%)   |
|                                         | Migraine                                | 198849 (30218–469528)     | 244.1% (220.3 to 261.8%) | 587.4 (103–1342.7)       | -1.3% (-4.9 to 3.2%)     |
|                                         | Tension-type headache                   | 19586 (6272–57731)        | 231.4% (191.2 to 263.2%) | 65.2 (22.1–183.3)        | -0.1% (-9.6 to 7.9%)     |
|                                         | Motor neuron disease                    | 628 (484–827)             | 144.4% (73.9 to 237.9%)  | 2.6 (1.8–3.6)            | -6.9% (-34.5 to 34.1%)   |
|                                         | Other neurological disorders            | 20488 (10466–34679)       | 221.5% (56.3 to 543.9%)  | 49.6 (28.8–79.6)         | 5.6% (-41.9 to 94.8%)    |
|                                         | Sudan                                   | Headache disorders        | 218435 (44781–493226)    | 242.9% (219.8 to 259.7%) | 652.5 (156.7–1422.4)     |
| Meningitis                              |                                         | 46672 (30936–71077)       | -79.9% (-87.4 to -69%)   | 100.3 (68.9–144.1)       | -85.1% (-90.2 to -77.6%) |
| Encephalitis                            |                                         | 14946 (8675–27391)        | 15.7% (-37.4 to 120.1%)  | 32.1 (19.6–58.4)         | -22.1% (-53.8 to 30.3%)  |
| Tetanus                                 |                                         | 2686 (1121–5579)          | -92.9% (-97.4 to -77.6%) | 5.6 (2.6–12.1)           | -94.3% (-97.8 to -83.9%) |
| Brain and central nervous system cancer |                                         | 48434 (29080–71332)       | 70.3% (-20 to 292.9%)    | 135.8 (84.2–196.4)       | -1.5% (-48.8 to 87.4%)   |
| Stroke*                                 |                                         | 522412 (385879–715571)    | 21.5% (-7.2 to 57.4%)    | 2585.5 (1970.5–3552.9)   | -33% (-45.3 to -16.9%)   |
| Ischaemic stroke                        |                                         | 304172 (232832–427020)    | 108.8% (61.1 to 165.4%)  | 1692.7 (1303.5–2360.6)   | 8.1% (-12.2 to 33.5%)    |
| Intracerebral haemorrhage               |                                         | 185673 (126437–260181)    | -20.6% (-43.3 to 7.9%)   | 769.9 (528.1–1070.3)     | -60.6% (-70 to -48%)     |
| Subarachnoid haemorrhage                |                                         | 32567 (18464–55769)       | -35.4% (-56.2 to 35.5%)  | 122.9 (71.2–208.7)       | -63.7% (-75 to -32.7%)   |
| Neurological disorders†                 |                                         | 420277 (204680–745904)    | 84.3% (37.5 to 130.9%)   | 1353.8 (761.5–2268.2)    | -7.1% (-20.6 to 6.3%)    |
| Alzheimer's disease and other dementias |                                         | 48141 (21134–107828)      | 107.9% (88.1 to 135.5%)  | 365.5 (160.3–840.7)      | -3.9% (-12.2 to 7%)      |
| Parkinson's disease                     |                                         | 13238 (10419–16768)       | 81.9% (38.4 to 143.1%)   | 85.5 (67.8–107.5)        | -4.3% (-26.5 to 26.1%)   |
| Idiopathic epilepsy                     |                                         | 74696 (43254–119485)      | 5.7% (-46.7 to 158.2%)   | 168.7 (97.5–271)         | -37.1% (-67.9 to 39.6%)  |
| Multiple sclerosis                      |                                         | 4194 (2566–6043)          | 175.8% (93.2 to 310.7%)  | 14 (8.9–19.2)            | 20.2% (-13.9 to 70.1%)   |
| Migraine                                |                                         | 234320 (36676–542009)     | 122.2% (114.9 to 132.9%) | 601.9 (104.6–1369.5)     | -0.1% (-3.2 to 3.2%)     |
| Tension-type headache                   |                                         | 23633 (7813–69143)        | 125% (95.3 to 148.4%)    | 66.4 (23.2–189)          | 0.5% (-11.8 to 9.8%)     |
| Motor neuron disease                    |                                         | 608 (449–804)             | 138.9% (63 to 241.8%)    | 2.1 (1.5–2.8)            | 17.3% (-23.4 to 74.9%)   |
| Other neurological disorders            |                                         | 21446 (12180–34810)       | 132.1% (17.3 to 374.3%)  | 49.7 (30.3–76.2)         | 33% (-28.5 to 152.1%)    |
| Headache disorders                      |                                         | 257953 (53961–578953)     | 122.5% (114.3 to 132.3%) | 668.3 (155.5–1438.9)     | -0.1% (-3.7 to 3.7%)     |
| <b>Deaths</b>                           |                                         |                           |                          |                          |                          |
| Global                                  | Meningitis                              | 236222 (204381–277426)    | -45.4% (-53.5 to -35.8%) | 3.3 (2.8–3.9)            | -56% (-62.5 to -48.3%)   |
|                                         | Encephalitis                            | 89897 (76532–122874)      | -23.7% (-38.9 to 12.9%)  | 1.2 (1–1.6)              | -45.7% (-56.1 to -21.1%) |
|                                         | Tetanus                                 | 34684 (25943–48457)       | -87.4% (-90.5 to -81.8%) | 0.5 (0.4–0.7)            | -89.5% (-91.9 to -84.9%) |
|                                         | Brain and central nervous system cancer | 246253 (185642–270930)    | 76.4% (11 to 104.9%)     | 3 (2.3–3.4)              | -1.2% (-36.8 to 13.9%)   |
|                                         | Stroke*                                 | 6552725 (5995200–7015139) | 43.3% (31 to 55.4%)      | 84.2 (76.8–90.2)         | -36.4% (-41.6 to -31.2%) |

**Table S12** Burden, mortality, incidence, and prevalence of neurological conditions in North Africa and Middle East countries

| Measure                                 | Cause                                   | Location      | All Ages                  |                          | Age-standardised       |                          |
|-----------------------------------------|-----------------------------------------|---------------|---------------------------|--------------------------|------------------------|--------------------------|
|                                         |                                         |               | Number                    | Percent change           | Rate per 100,000       | Percent change           |
|                                         |                                         |               | 2019                      | From 1990 to 2019        | 2019                   | From 1990 to 2019        |
|                                         |                                         | Mean (95% UI) | Mean (95% UI)             | Mean (95% UI)            | Mean (95% UI)          |                          |
| North Africa and Middle East            | Ischaemic stroke                        |               | 3293397 (2973537–3536076) | 60.7% (45.8 to 74.7%)    | 43.5 (39.1–46.8)       | -33.6% (-39.2 to -28.2%) |
|                                         | Intracerebral haemorrhage               |               | 2886196 (2644484–3099351) | 37.5% (21.7 to 50.9%)    | 36 (33–38.7)           | -35.6% (-42.8 to -29.2%) |
|                                         | Subarachnoid haemorrhage                |               | 373131 (330033–415937)    | -12.1% (-25.3 to 26.3%)  | 4.7 (4.1–5.2)          | -57.4% (-63.8 to -38.8%) |
|                                         | Neurological disorders†                 |               | 2221323 (1027903–4759829) | 154.3% (120.5 to 174.1%) | 30.7 (13.8–66.3)       | 1.2% (-2.8 to 7.7%)      |
|                                         | Alzheimer's disease and other dementias |               | 1623276 (407465–4205719)  | 189.4% (173.5 to 214.5%) | 22.9 (5.8–59.2)        | 3% (-1.2 to 9.8%)        |
|                                         | Parkinson's disease                     |               | 362907 (326855–388200)    | 146.5% (128.1 to 162.8%) | 4.8 (4.3–5.1)          | 3.8% (-3.3 to 10.1%)     |
|                                         | Idiopathic epilepsy                     |               | 114011 (100178–129928)    | 13.9% (-1.4 to 51.6%)    | 1.5 (1.3–1.7)          | -24.8% (-34.2 to -1.6%)  |
|                                         | Multiple sclerosis                      |               | 22439 (20226–27792)       | 68% (40.1 to 84%)        | 0.3 (0.2–0.3)          | -14% (-29.1 to -5.9%)    |
|                                         | Motor neuron disease                    |               | 39081 (36567–41130)       | 121.4% (108 to 135.4%)   | 0.5 (0.4–0.5)          | 12.4% (5.7 to 19.3%)     |
|                                         | Other neurological disorders            |               | 59610 (55082–64551)       | 74.8% (59.5 to 91.6%)    | 0.8 (0.7–0.8)          | -0.2% (-8.2 to 9.2%)     |
|                                         | Meningitis                              |               | 6275 (5332–7405)          | -64.1% (-72.2 to -54.5%) | 1.2 (1–1.4)            | -71.6% (-77.1 to -64.9%) |
|                                         | Encephalitis                            |               | 3926 (3148–5118)          | 26.2% (-9.4 to 71.2%)    | 0.7 (0.6–0.9)          | -24.9% (-42.7 to -1.9%)  |
|                                         | Tetanus                                 |               | 1289 (823–2015)           | -84.1% (-91.3 to -69%)   | 0.2 (0.2–0.4)          | -88.9% (-93.3 to -80.6%) |
|                                         | Brain and central nervous system cancer |               | 17773 (12096–20936)       | 111.5% (30.3 to 173.4%)  | 3.7 (2.5–4.3)          | 3% (-33.4 to 30.2%)      |
|                                         | Stroke*                                 |               | 312220 (278450–349726)    | 75.5% (56.2 to 98.8%)    | 87.7 (78.2–97.6)       | -27.8% (-35.4 to -16%)   |
|                                         | Ischaemic stroke                        |               | 210108 (187141–234048)    | 141.8% (110.1 to 175%)   | 62.9 (56.3–69.9)       | -9.1% (-20.7 to 4%)      |
|                                         | Intracerebral haemorrhage               |               | 88542 (77871–101100)      | 18% (1.5 to 37.8%)       | 21.6 (19–24.3)         | -51.4% (-58.1 to -41.3%) |
|                                         | Subarachnoid haemorrhage                |               | 13570 (11176–16789)       | -15% (-35.7 to 38.8%)    | 3.2 (2.6–3.9)          | -59% (-70.7 to -31.6%)   |
|                                         | Neurological disorders†                 |               | 99628 (47340–213242)      | 153.3% (111 to 207.8%)   | 33.2 (14.3–73.9)       | -2.8% (-9.6 to 13.9%)    |
|                                         | Alzheimer's disease and other dementias |               | 70483 (17247–185789)      | 191.6% (169.8 to 253.2%) | 25.5 (6.3–67.1)        | -2.3% (-9 to 17.3%)      |
|                                         | Parkinson's disease                     |               | 16784 (14607–21649)       | 179.4% (145.9 to 225.5%) | 5.3 (4.6–6.9)          | 2.3% (-10 to 19%)        |
|                                         | Idiopathic epilepsy                     |               | 6570 (5357–7629)          | 5.3% (-16.7 to 70.4%)    | 1.2 (1–1.4)            | -33.4% (-46.2 to 2.1%)   |
|                                         | Multiple sclerosis                      |               | 1436 (1176–1814)          | 147.3% (83.1 to 248%)    | 0.3 (0.2–0.3)          | 5.1% (-25 to 47.6%)      |
|                                         | Motor neuron disease                    |               | 1068 (855–1318)           | 90.4% (23.9 to 177.6%)   | 0.2 (0.2–0.3)          | 9.3% (-26.7 to 51.1%)    |
|                                         | Other neurological disorders            |               | 3287 (2889–3778)          | 85.9% (42.8 to 136.2%)   | 0.7 (0.6–0.8)          | 17.4% (-7.9 to 49.9%)    |
|                                         | Algeria                                 | Meningitis    |                           | 292 (234–363)            | -65.2% (-78.1 to -47%) | 0.9 (0.7–1.1)            |
| Encephalitis                            |                                         |               | 134 (94–253)              | 18.7% (-23.4 to 79.4%)   | 0.4 (0.3–0.7)          | -23.2% (-44.7 to 7.1%)   |
| Tetanus                                 |                                         |               | 10 (7–20)                 | -77.1% (-90.6 to -38.5%) | 0 (0–0.1)              | -84.3% (-93.4 to -61.1%) |
| Brain and central nervous system cancer |                                         |               | 557 (355–702)             | 102% (12.2 to 175.5%)    | 1.5 (1–1.9)            | 1.2% (-43.3 to 38.9%)    |
| Stroke*                                 |                                         |               | 24811 (19995–30219)       | 77.1% (38.3 to 122.6%)   | 101.5 (82.6–121.6)     | -43.4% (-54.9 to -30.2%) |
| Ischaemic stroke                        |                                         |               | 18650 (14812–22930)       | 154.5% (98.1 to 225.9%)  | 80.1 (64.4–96.8)       | -27.9% (-42.2 to -10.5%) |
| Intracerebral haemorrhage               |                                         |               | 5276 (4129–6725)          | -7.7% (-30.8 to 21.9%)   | 18.5 (14.5–23.6)       | -69.3% (-76.8 to -60.1%) |
| Subarachnoid haemorrhage                |                                         |               | 885 (658–1175)            | -8.1% (-36.8 to 47.8%)   | 2.9 (2.1–3.7)          | -64.6% (-75.9 to -42.9%) |
| Neurological disorders†                 |                                         |               | 7191 (3170–16735)         | 200% (114 to 293.4%)     | 34.2 (13.6–81.7)       | -10.5% (-26.8 to 6.2%)   |
| Alzheimer's disease and other dementias |                                         |               | 5209 (1256–14968)         | 289.7% (212.2 to 394.7%) | 27 (6.6–74.5)          | -6.3% (-20.6 to 11%)     |
| Parkinson's disease                     |                                         |               | 1283 (1019–1583)          | 192.2% (125.1 to 277.6%) | 5.4 (4.4–6.7)          | -18.7% (-36.3 to 4.6%)   |
| Idiopathic epilepsy                     |                                         |               | 410 (313–514)             | -16.3% (-39.6 to 30.7%)  | 1.1 (0.8–1.3)          | -49.1% (-62.4 to -24.2%) |
| Multiple sclerosis                      |                                         |               | 101 (52–142)              | 166.5% (59.6 to 303%)    | 0.3 (0.1–0.4)          | 1.6% (-38.3 to 50.7%)    |
| Motor neuron disease                    |                                         |               | 23 (17–31)                | 149.1% (67.4 to 278.1%)  | 0.1 (0–0.1)            | -2.1% (-34.8 to 49.6%)   |
| Other neurological disorders            |                                         |               | 165 (136–198)             | 95.3% (32.9 to 164.6%)   | 0.5 (0.4–0.5)          | 10.4% (-20.6 to 45.5%)   |

**Table S12** Burden, mortality, incidence, and prevalence of neurological conditions in North Africa and Middle East countries

| Measure                      |                                         | All Ages                 |                                     | Age-standardised         |                                     |
|------------------------------|-----------------------------------------|--------------------------|-------------------------------------|--------------------------|-------------------------------------|
|                              |                                         | Number<br>2019           | Percent change<br>From 1990 to 2019 | Rate per 100,000<br>2019 | Percent change<br>From 1990 to 2019 |
| Cause                        | Location                                | Mean (95% UI)            | Mean (95% UI)                       | Mean (95% UI)            | Mean (95% UI)                       |
| Bahrain                      | Meningitis                              | 3 (3–4)                  | -33.2% (-50.1 to -13%)              | 0.4 (0.3–0.5)            | -73.1% (-78.8 to -66.1%)            |
|                              | Encephalitis                            | 2 (2–3)                  | 95% (41.5 to 152.2%)                | 0.2 (0.2–0.3)            | -24.2% (-42.9 to -3.5%)             |
|                              | Tetanus                                 | 0 (0–0)                  | 62.3% (-29.1 to 156.3%)             | 0 (0–0)                  | -44.1% (-76.2 to -11.3%)            |
|                              | Brain and central nervous system cancer | 26 (16–34)               | 232.8% (94.8 to 386%)               | 2.1 (1.4–2.7)            | -25.6% (-54.8 to 8.1%)              |
|                              | Stroke*                                 | 245 (200–310)            | 109.6% (64.1 to 168.7%)             | 52.8 (43.5–66.9)         | -48.5% (-58.4 to -36.5%)            |
|                              | Ischaemic stroke                        | 136 (111–177)            | 144.8% (93.3 to 209.7%)             | 37.5 (30.5–47.6)         | -41.4% (-53.2 to -27.1%)            |
|                              | Intracerebral haemorrhage               | 88 (70–113)              | 76.1% (33.5 to 133.1%)              | 13.1 (10.7–16.9)         | -61.2% (-70 to -50.1%)              |
|                              | Subarachnoid haemorrhage                | 20 (15–31)               | 84.3% (23.7 to 177%)                | 2.2 (1.7–3.3)            | -52.9% (-69.4 to -32.1%)            |
|                              | Neurological disorders†                 | 123 (64–251)             | 273.8% (183 to 359.2%)              | 36 (15.2–80.7)           | -7.1% (-21.6 to 10.1%)              |
|                              | Alzheimer's disease and other dementias | 74 (18–202)              | 374.9% (290.8 to 482.7%)            | 27.3 (6.6–72)            | -4.4% (-18.2 to 13.2%)              |
|                              | Parkinson's disease                     | 21 (15–27)               | 286.6% (187.6 to 403.7%)            | 6 (4.2–7.4)              | -7.7% (-29.9 to 17.9%)              |
|                              | Idiopathic epilepsy                     | 17 (13–22)               | 102.2% (56.6 to 171.7%)             | 1.7 (1.3–2.1)            | -34.3% (-49.1 to -13.8%)            |
|                              | Multiple sclerosis                      | 2 (1–3)                  | 422.7% (202.3 to 628.6%)            | 0.1 (0.1–0.2)            | -6.6% (-44.1 to 28.6%)              |
|                              | Motor neuron disease                    | 1 (0–1)                  | 108.8% (52.1 to 183.7%)             | 0 (0–0.1)                | -63.6% (-73.4 to -51.1%)            |
| Other neurological disorders | 8 (6–10)                                | 199.2% (131.5 to 284.7%) | 0.8 (0.7–1)                         | -0.8% (-21.5 to 24.7%)   |                                     |
| Egypt                        | Meningitis                              | 764 (512–1067)           | -63.9% (-76.2 to -46.5%)            | 0.8 (0.6–1.2)            | -72.2% (-81.4 to -58.8%)            |
|                              | Encephalitis                            | 910 (508–1371)           | 3.6% (-36.7 to 62.8%)               | 1 (0.6–1.4)              | -30% (-54.8 to 2.7%)                |
|                              | Tetanus                                 | 136 (47–393)             | -83.9% (-94.4 to -50.8%)            | 0.2 (0.1–0.5)            | -89.2% (-95.3 to -68.8%)            |
|                              | Brain and central nervous system cancer | 2066 (1425–3046)         | 101.3% (25.7 to 185%)               | 2.7 (1.8–4.1)            | 5.4% (-28.7 to 47.6%)               |
|                              | Stroke*                                 | 45767 (33557–63157)      | 32.2% (-2.7 to 75.5%)               | 85.7 (63.1–118.9)        | -22.6% (-42.6 to 1.6%)              |
|                              | Ischaemic stroke                        | 30078 (21909–41497)      | 137% (65.8 to 212.8%)               | 62.3 (46–86.1)           | 15.3% (-17.3 to 51.5%)              |
|                              | Intracerebral haemorrhage               | 13654 (9489–19503)       | -19% (-42.5 to 13.9%)               | 20.7 (14.5–30.1)         | -56.1% (-69.1 to -38.9%)            |
|                              | Subarachnoid haemorrhage                | 2035 (1418–2867)         | -60% (-74.5 to -18.4%)              | 2.8 (1.9–3.9)            | -71.4% (-81.7 to -44.7%)            |
|                              | Neurological disorders†                 | 10675 (5110–22175)       | 109.8% (70 to 162.7%)               | 31.2 (12.8–70.1)         | 1.1% (-15.1 to 25.8%)               |
|                              | Alzheimer's disease and other dementias | 6918 (1554–18509)        | 110.8% (72 to 172.7%)               | 23.6 (5.4–63.1)          | -1.7% (-17.6 to 23.2%)              |
|                              | Parkinson's disease                     | 2439 (1842–3675)         | 133.4% (84.4 to 193.2%)             | 6 (4.6–9.3)              | 12.2% (-10.6 to 38.2%)              |
|                              | Idiopathic epilepsy                     | 441 (302–644)            | 8.4% (-21.3 to 66.4%)               | 0.5 (0.3–0.7)            | -34.5% (-52 to -4.4%)               |
|                              | Multiple sclerosis                      | 191 (96–426)             | 96.5% (-24.9 to 377.8%)             | 0.2 (0.1–0.4)            | 5.9% (-48 to 122.5%)                |
|                              | Motor neuron disease                    | 177 (98–284)             | 287.6% (104.4 to 557.7%)            | 0.2 (0.1–0.4)            | 85% (-4.9 to 213.5%)                |
| Other neurological disorders | 510 (341–722)                           | 141.1% (70.4 to 228.5%)  | 0.7 (0.5–1)                         | 54.1% (9 to 104.8%)      |                                     |
| Iran (Islamic Republic of)   | Meningitis                              | 577 (515–647)            | -67.7% (-75 to -57.1%)              | 0.8 (0.7–0.9)            | -72.3% (-78 to -64.3%)              |
|                              | Encephalitis                            | 217 (157–244)            | 18% (-13.1 to 52.2%)                | 0.3 (0.2–0.3)            | -15.6% (-37.9 to 4.8%)              |
|                              | Tetanus                                 | 17 (12–24)               | -91.5% (-96.4 to -75.4%)            | 0 (0–0)                  | -92.3% (-96.6 to -81.3%)            |
|                              | Brain and central nervous system cancer | 3494 (1751–4173)         | 97.5% (5 to 138.5%)                 | 4.6 (2.3–5.5)            | -1.1% (-43.8 to 22.9%)              |
|                              | Stroke*                                 | 40912 (36741–43849)      | 88.6% (67.7 to 118.5%)              | 66.2 (58.7–71.3)         | -45.1% (-50.6 to -35.4%)            |
|                              | Ischaemic stroke                        | 33151 (29508–35673)      | 109.7% (83.3 to 144.4%)             | 54.8 (48.3–59.2)         | -42.7% (-49.7 to -32.3%)            |
|                              | Intracerebral haemorrhage               | 6308 (5792–6705)         | 34% (14.5 to 54.5%)                 | 9.3 (8.4–9.9)            | -52.5% (-59.6 to -43.2%)            |
|                              | Subarachnoid haemorrhage                | 1453 (1269–1653)         | 23.2% (-13.9 to 95.6%)              | 2.1 (1.8–2.4)            | -60.6% (-73.8 to -34.9%)            |
|                              | Neurological disorders†                 | 18338 (7975–41415)       | 276.2% (178.8 to 397.5%)            | 32.1 (13.2–73.9)         | -1.4% (-8.6 to 27.8%)               |
|                              | Alzheimer's disease and other dementias | 13910 (3444–37233)       | 382% (336.4 to 552.3%)              | 25.3 (6.4–67.6)          | -0.6% (-7.1 to 34.5%)               |
|                              | Parkinson's disease                     | 2848 (2432–3155)         | 343.1% (276.8 to 429.9%)            | 4.8 (4.1–5.3)            | 6.7% (-12.6 to 28.4%)               |
|                              | Idiopathic epilepsy                     | 662 (605–776)            | -33.7% (-49.3 to 7.6%)              | 0.8 (0.7–1)              | -51.1% (-60.7 to -26.1%)            |

**Table S12** Burden, mortality, incidence, and prevalence of neurological conditions in North Africa and Middle East countries

| Measure                                 |                                         | All Ages             |                          | Age-standardised     |                          |
|-----------------------------------------|-----------------------------------------|----------------------|--------------------------|----------------------|--------------------------|
|                                         |                                         | Number               | Percent change           | Rate per 100,000     | Percent change           |
| Cause                                   | Location                                | 2019                 | From 1990 to 2019        | 2019                 | From 1990 to 2019        |
|                                         |                                         | Mean (95% UI)        | Mean (95% UI)            | Mean (95% UI)        | Mean (95% UI)            |
| Iraq                                    | Multiple sclerosis                      | 396 (328–587)        | 175.2% (96.6 to 288.4%)  | 0.5 (0.4–0.7)        | 4.8% (-28.2 to 55.7%)    |
|                                         | Motor neuron disease                    | 103 (89–119)         | 268.2% (140 to 424.8%)   | 0.1 (0.1–0.2)        | 61.9% (4 to 134%)        |
|                                         | Other neurological disorders            | 419 (390–449)        | 138.6% (82.4 to 224.6%)  | 0.6 (0.5–0.6)        | 39.2% (8.1 to 95.9%)     |
|                                         | Meningitis                              | 427 (336–535)        | -63.2% (-73.7 to -48.1%) | 1.3 (1–1.5)          | -74.8% (-81.1 to -66.3%) |
|                                         | Encephalitis                            | 457 (334–590)        | 31.1% (-15.5 to 97.9%)   | 1.3 (1–1.6)          | -30.8% (-51.1 to -2.8%)  |
|                                         | Tetanus                                 | 24 (15–39)           | -90% (-96.7 to -53.6%)   | 0.1 (0–0.1)          | -92.7% (-97.3 to -72.4%) |
|                                         | Brain and central nervous system cancer | 1842 (1330–2362)     | 215.1% (65.6 to 389.7%)  | 6.4 (4.7–8.2)        | 26% (-31.9 to 93.6%)     |
|                                         | Stroke*                                 | 26256 (21422–31075)  | 123.8% (77.4 to 177.3%)  | 143.3 (119.2–166.1)  | -13.7% (-30.2 to 4.5%)   |
|                                         | Ischaemic stroke                        | 16678 (13716–19426)  | 150.2% (98.3 to 210.1%)  | 101 (83.9–116)       | -1.9% (-21.6 to 19%)     |
|                                         | Intracerebral haemorrhage               | 9012 (7054–11186)    | 102.5% (52.5 to 163.8%)  | 40 (32.2–48)         | -28.3% (-45.3 to -7.8%)  |
|                                         | Subarachnoid haemorrhage                | 566 (410–796)        | -8.1% (-42.6 to 65%)     | 2.3 (1.7–3.3)        | -68.4% (-80.4 to -40.9%) |
|                                         | Neurological disorders†                 | 4654 (2139–9861)     | 134% (95.7 to 183.2%)    | 32.4 (13.3–72)       | 1.2% (-13.6 to 22.6%)    |
|                                         | Alzheimer's disease and other dementias | 3259 (779–8524)      | 135.7% (99.4 to 182.6%)  | 25.3 (6.1–65.7)      | -0.5% (-14.6 to 18.8%)   |
|                                         | Jordan                                  | Parkinson's disease  | 842 (684–1150)           | 202% (137 to 289.8%) | 5.7 (4.6–7.4)            |
| Idiopathic epilepsy                     |                                         | 301 (225–393)        | 31.1% (-6.5 to 101%)     | 0.8 (0.6–1)          | -42.7% (-58 to -15.7%)   |
| Multiple sclerosis                      |                                         | 40 (28–57)           | 225.3% (107.9 to 436.1%) | 0.1 (0.1–0.2)        | 4.8% (-31.5 to 69.7%)    |
| Motor neuron disease                    |                                         | 11 (8–15)            | 240.1% (91.6 to 463.7%)  | 0 (0–0.1)            | 19.7% (-35.8 to 111.1%)  |
| Other neurological disorders            |                                         | 201 (155–254)        | 144% (72.2 to 285.9%)    | 0.6 (0.4–0.7)        | 12.1% (-19.5 to 74.4%)   |
| Meningitis                              |                                         | 83 (66–104)          | 11.3% (-20.7 to 59.6%)   | 0.9 (0.8–1.2)        | -58.7% (-68.7 to -43.7%) |
| Encephalitis                            |                                         | 15 (11–22)           | -4.5% (-43.3 to 173.6%)  | 0.2 (0.1–0.2)        | -65% (-78.2 to -13.6%)   |
| Tetanus                                 |                                         | 2 (1–3)              | -64.2% (-82.6 to 3.4%)   | 0 (0–0)              | -82.4% (-91.2 to -58.2%) |
| Brain and central nervous system cancer |                                         | 228 (162–282)        | 261.5% (125.1 to 391.7%) | 2.8 (2–3.5)          | -5.6% (-42.1 to 30.6%)   |
| Stroke*                                 |                                         | 3367 (2758–3983)     | 136.2% (89.6 to 188.2%)  | 75.7 (61.3–89)       | -49.8% (-59.4 to -39.2%) |
| Ischaemic stroke                        |                                         | 2472 (2020–2919)     | 155.9% (98.6 to 214.9%)  | 59.2 (47.4–69.3)     | -46.9% (-57.8 to -35.2%) |
| Intracerebral haemorrhage               |                                         | 820 (676–980)        | 93.7% (53.3 to 142.9%)   | 15.2 (12.6–18.1)     | -58.3% (-66.7 to -47.5%) |
| Subarachnoid haemorrhage                |                                         | 76 (55–94)           | 107.4% (41.9 to 224.3%)  | 1.2 (0.9–1.6)        | -54.9% (-69.5 to -30.4%) |
| Neurological disorders†                 |                                         | 1094 (503–2425)      | 313% (232.7 to 404.2%)   | 30.3 (12.4–67.6)     | -9.4% (-23.2 to 11.5%)   |
| Kuwait                                  | Alzheimer's disease and other dementias | 767 (188–2164)       | 356.6% (286.2 to 471.1%) | 24 (6–62)            | -7.6% (-21.4 to 15.9%)   |
|                                         | Parkinson's disease                     | 192 (160–228)        | 332.8% (245.4 to 442.6%) | 4.9 (4.1–5.8)        | -13.2% (-30 to 8.6%)     |
|                                         | Idiopathic epilepsy                     | 67 (51–81)           | 107% (54.6 to 194.2%)    | 0.6 (0.5–0.8)        | -38.7% (-52.8 to -12.8%) |
|                                         | Multiple sclerosis                      | 17 (11–23)           | 308.5% (164.5 to 467.6%) | 0.2 (0.1–0.2)        | -14.5% (-43.1 to 18%)    |
|                                         | Motor neuron disease                    | 6 (4–7)              | 455.5% (263.9 to 761%)   | 0.1 (0–0.1)          | 21.1% (-22.7 to 91.8%)   |
|                                         | Other neurological disorders            | 45 (38–55)           | 201% (120.6 to 307.9%)   | 0.5 (0.4–0.6)        | -0.3% (-23.7 to 30.5%)   |
|                                         | Meningitis                              | 12 (10–15)           | -5.6% (-28.6 to 20.3%)   | 0.4 (0.3–0.5)        | -59.4% (-68.3 to -49.6%) |
|                                         | Encephalitis                            | 6 (5–8)              | 73% (40 to 119.9%)       | 0.2 (0.1–0.2)        | -22.3% (-36.3 to -4.5%)  |
|                                         | Tetanus                                 | 0 (0–0)              | 89.1% (-77.3 to 574%)    | 0 (0–0)              | -62.6% (-93.9 to -13.5%) |
|                                         | Brain and central nervous system cancer | 59 (42–74)           | 205% (87.4 to 288.9%)    | 1.9 (1.3–2.4)        | 1.6% (-38.5 to 31.3%)    |
|                                         | Stroke*                                 | 920 (757–1093)       | 301.8% (235.8 to 381.5%) | 46.5 (38–55.2)       | -9.6% (-24.2 to 7.7%)    |
|                                         | Ischaemic stroke                        | 617 (504–742)        | 317.1% (246.1 to 401.3%) | 34.2 (27.7–41)       | -10.5% (-25.6 to 6.9%)   |
|                                         | Intracerebral haemorrhage               | 263 (207–319)        | 313.5% (222.5 to 417.9%) | 10.8 (8.5–13.1)      | -3.7% (-26.2 to 21.5%)   |
|                                         | Subarachnoid haemorrhage                | 40 (33–51)           | 130.4% (74.7 to 243.4%)  | 1.6 (1.3–2)          | -24.8% (-43 to 3.4%)     |
| Neurological disorders†                 | 532 (216–1200)                          | 331% (223.4 to 405%) | 29.9 (11.4–69)           | -7.2% (-20 to 4.2%)  |                          |



**Table S12** Burden, mortality, incidence, and prevalence of neurological conditions in North Africa and Middle East countries

|                                         |                                         | All Ages            |                          | Age-standardised        |                          |                          |
|-----------------------------------------|-----------------------------------------|---------------------|--------------------------|-------------------------|--------------------------|--------------------------|
| Measure                                 | Location                                | Number              | Percent change           | Rate per 100,000        | Percent change           |                          |
|                                         |                                         | 2019                | From 1990 to 2019        | 2019                    | From 1990 to 2019        |                          |
| Cause                                   |                                         | Mean (95% UI)       | Mean (95% UI)            | Mean (95% UI)           | Mean (95% UI)            |                          |
| Lebanon                                 | Alzheimer's disease and other dementias | 425 (110–1086)      | 439.9% (380.6 to 519.8%) | 25.1 (6.5–64)           | -2.1% (-12.8 to 10.4%)   |                          |
|                                         | Parkinson's disease                     | 58 (47–69)          | 253.2% (199.8 to 317.8%) | 3.5 (2.8–4.2)           | -25.1% (-36.3 to -11.7%) |                          |
|                                         | Idiopathic epilepsy                     | 28 (23–35)          | 65.6% (38 to 112.8%)     | 0.7 (0.6–0.9)           | -30.6% (-42.2 to -13%)   |                          |
|                                         | Multiple sclerosis                      | 5 (4–7)             | 300.3% (202.6 to 437.9%) | 0.1 (0.1–0.2)           | 0.8% (-23 to 34.7%)      |                          |
|                                         | Motor neuron disease                    | 4 (3–5)             | 12.5% (-20.2 to 52.2%)   | 0.1 (0.1–0.2)           | -54.4% (-66.8 to -38.7%) |                          |
|                                         | Other neurological disorders            | 12 (10–14)          | 81.1% (39.7 to 130.5%)   | 0.4 (0.3–0.4)           | -24.6% (-40.4 to -5.3%)  |                          |
|                                         | Meningitis                              | 34 (25–45)          | -40% (-59.3 to -15.2%)   | 0.7 (0.5–0.9)           | -64% (-75.3 to -50.8%)   |                          |
|                                         | Encephalitis                            | 15 (10–28)          | 38.4% (-6 to 106.6%)     | 0.3 (0.2–0.5)           | -19% (-42.9 to 19.7%)    |                          |
|                                         | Tetanus                                 | 23 (5–99)           | -52.6% (-90.5 to 57.5%)  | 0.5 (0.1–1.9)           | -79.9% (-95.6 to -34.5%) |                          |
|                                         | Brain and central nervous system cancer | 168 (122–220)       | 82.5% (24.5 to 153.2%)   | 3.2 (2.3–4.2)           | -9% (-37.6 to 25.4%)     |                          |
|                                         | Stroke*                                 | 1764 (1236–2298)    | 81% (30.1 to 143.2%)     | 35.2 (24.5–45.6)        | -39.5% (-55.5 to -19.2%) |                          |
|                                         | Ischaemic stroke                        | 1470 (986–1903)     | 140.4% (63.2 to 215.4%)  | 29.4 (19.6–38.2)        | -25% (-48 to -1.1%)      |                          |
|                                         | Intracerebral haemorrhage               | 257 (188–351)       | -16.7% (-40.7 to 19.7%)  | 5 (3.7–6.9)             | -69.1% (-78.1 to -55.1%) |                          |
|                                         | Subarachnoid haemorrhage                | 37 (21–54)          | -32.3% (-66.5 to 27.1%)  | 0.7 (0.4–1)             | -72.7% (-86.7 to -47.5%) |                          |
|                                         | Neurological disorders†                 | 1578 (622–3760)     | 210.9% (145.6 to 344.6%) | 33 (12.6–78.5)          | -4.9% (-21.7 to 37.3%)   |                          |
|                                         | Alzheimer's disease and other dementias | 1255 (306–3375)     | 246% (186.4 to 425.1%)   | 26.8 (6.5–70.8)         | -2.6% (-19.7 to 48%)     |                          |
|                                         | Parkinson's disease                     | 226 (180–312)       | 171.3% (98.1 to 266.4%)  | 4.4 (3.5–6)             | -14.1% (-37.2 to 15.7%)  |                          |
|                                         | Libya                                   | Idiopathic epilepsy | 46 (34–63)               | 11.6% (-19.2 to 62.4%)  | 0.9 (0.6–1.2)            | -36.7% (-54.2 to -10.2%) |
|                                         |                                         | Multiple sclerosis  | 15 (8–21)                | 128.8% (49.9 to 257.5%) | 0.3 (0.1–0.4)            | 7.5% (-29.5 to 66.7%)    |
| Motor neuron disease                    |                                         | 4 (2–8)             | 111.7% (19.5 to 245.5%)  | 0.1 (0–0.1)             | 7.3% (-39.3 to 75.9%)    |                          |
| Other neurological disorders            |                                         | 31 (24–41)          | 171.8% (93.4 to 278.8%)  | 0.6 (0.5–0.8)           | 46% (3.4 to 100.9%)      |                          |
| Meningitis                              |                                         | 43 (32–56)          | -52.1% (-68.5 to -30.9%) | 0.8 (0.6–1)             | -61.9% (-73.8 to -47.3%) |                          |
| Encephalitis                            |                                         | 19 (12–37)          | 34.3% (-8.3 to 94.4%)    | 0.3 (0.2–0.7)           | -9.6% (-35 to 33.9%)     |                          |
| Tetanus                                 |                                         | 1 (1–3)             | -57% (-83.6 to 8.3%)     | 0 (0–0.1)               | -68.6% (-89.3 to -26.5%) |                          |
| Brain and central nervous system cancer |                                         | 217 (161–289)       | 114.8% (50.6 to 210.9%)  | 3.7 (2.8–4.9)           | -0.9% (-28.4 to 40.2%)   |                          |
| Stroke*                                 |                                         | 3086 (2364–4016)    | 97.1% (51.4 to 161.9%)   | 69.4 (53–90.1)          | -17.9% (-36.4 to 7.9%)   |                          |
| Ischaemic stroke                        |                                         | 2301 (1732–3073)    | 181.8% (117.4 to 274.3%) | 54.1 (40.9–72.5)        | 5.7% (-18.7 to 38.2%)    |                          |
| Intracerebral haemorrhage               |                                         | 678 (497–936)       | 15.4% (-15.4 to 60%)     | 13.3 (9.7–18.1)         | -52.9% (-65.2 to -35.6%) |                          |
| Subarachnoid haemorrhage                |                                         | 107 (73–156)        | -33.9% (-57.7 to 27.1%)  | 2 (1.4–2.9)             | -60.9% (-73.2 to -36.3%) |                          |
| Neurological disorders†                 |                                         | 1438 (613–3179)     | 154.3% (102.3 to 218.1%) | 35.8 (14.3–80.8)        | -1.9% (-19.7 to 23.8%)   |                          |
| Alzheimer's disease and other dementias |                                         | 1094 (276–2789)     | 162.3% (114 to 232.1%)   | 28.6 (7.2–72.8)         | -3.8% (-21.4 to 22%)     |                          |
| Parkinson's disease                     |                                         | 203 (150–265)       | 202.9% (125 to 314.9%)   | 5 (3.7–6.5)             | 9.9% (-18.1 to 50.5%)    |                          |
| Idiopathic epilepsy                     |                                         | 75 (55–101)         | 23.2% (-11.1 to 80.8%)   | 1.1 (0.8–1.5)           | -25.7% (-44.4 to 3.3%)   |                          |
| Multiple sclerosis                      |                                         | 21 (11–35)          | 288.9% (132.2 to 591.5%) | 0.3 (0.2–0.5)           | 38.4% (-17.3 to 139.5%)  |                          |
| Motor neuron disease                    |                                         | 6 (3–9)             | 297.9% (82.7 to 653.6%)  | 0.1 (0.1–0.1)           | 51.4% (-30.9 to 187%)    |                          |
| Other neurological disorders            |                                         | 39 (29–51)          | 190.1% (89.2 to 360%)    | 0.7 (0.5–0.8)           | 58.5% (6.7 to 145.6%)    |                          |
| Morocco                                 | Meningitis                              | 400 (288–511)       | -74.8% (-83.3 to -63.5%) | 1.3 (1–1.7)             | -74.7% (-82.4 to -65.3%) |                          |
|                                         | Encephalitis                            | 150 (83–309)        | 18.5% (-23.8 to 72.5%)   | 0.5 (0.3–1)             | -10.9% (-36.4 to 24.4%)  |                          |
|                                         | Tetanus                                 | 113 (30–374)        | -93.7% (-98.5 to -77%)   | 0.4 (0.1–1.3)           | -92.6% (-98.1 to -76.1%) |                          |
|                                         | Brain and central nervous system cancer | 479 (344–639)       | 91.3% (24.4 to 168.9%)   | 1.4 (1–1.9)             | 5.9% (-28.1 to 45.2%)    |                          |
|                                         | Stroke*                                 | 29033 (23331–35135) | 96.6% (55.4 to 142.5%)   | 116.4 (94.2–139.3)      | -11.9% (-29.1 to 8%)     |                          |
|                                         | Ischaemic stroke                        | 21220 (16956–25800) | 184% (118.6 to 248.7%)   | 88.9 (71.8–108.4)       | 19% (-6.7 to 43.8%)      |                          |
|                                         | Intracerebral haemorrhage               | 6700 (5090–8430)    | 10.4% (-19.5 to 48%)     | 23.6 (18.4–29.1)        | -51.2% (-63.6 to -34.6%) |                          |

**Table S12** Burden, mortality, incidence, and prevalence of neurological conditions in North Africa and Middle East countries

| Measure                                 |                                         | All Ages                 |                                     | Age-standardised         |                                     |
|-----------------------------------------|-----------------------------------------|--------------------------|-------------------------------------|--------------------------|-------------------------------------|
|                                         |                                         | Number<br>2019           | Percent change<br>From 1990 to 2019 | Rate per 100,000<br>2019 | Percent change<br>From 1990 to 2019 |
| Cause                                   | Location                                | Mean (95% UI)            | Mean (95% UI)                       | Mean (95% UI)            | Mean (95% UI)                       |
|                                         | Subarachnoid haemorrhage                | 1113 (763–1621)          | -9.3% (-39.6 to 56.5%)              | 3.9 (2.8–5.6)            | -56.8% (-71.3 to -21.3%)            |
|                                         | Neurological disorders†                 | 6917 (3047–15662)        | 160.3% (118.3 to 199.1%)            | 33.1 (13.6–78)           | 6.7% (-8.8 to 26.7%)                |
|                                         | Alzheimer's disease and other dementias | 4945 (1122–13768)        | 161.9% (120.2 to 204.4%)            | 25.4 (5.9–70.2)          | 0.7% (-14.2 to 16.1%)               |
|                                         | Parkinson's disease                     | 1390 (1122–1614)         | 244.3% (174.9 to 340.4%)            | 6 (4.9–7)                | 46.6% (16.7 to 85.9%)               |
|                                         | Idiopathic epilepsy                     | 304 (101–846)            | 19.9% (-21.2 to 82.6%)              | 0.9 (0.3–2.5)            | -21.8% (-45.3 to 13.6%)             |
|                                         | Multiple sclerosis                      | 99 (51–148)              | 177.1% (74.4 to 334.2%)             | 0.3 (0.1–0.4)            | 31.5% (-16.5 to 103.4%)             |
|                                         | Motor neuron disease                    | 22 (15–30)               | 193.5% (84 to 332.1%)               | 0.1 (0–0.1)              | 35% (-15.5 to 101.1%)               |
|                                         | Other neurological disorders            | 157 (111–204)            | 129.5% (71.1 to 211.1%)             | 0.5 (0.3–0.6)            | 48.6% (12 to 96.5%)                 |
| Palestine                               | Meningitis                              | 28 (23–33)               | -72.2% (-81.1 to -58.8%)            | 0.9 (0.8–1.1)            | -77.8% (-83.4 to -70.1%)            |
|                                         | Encephalitis                            | 10 (8–15)                | 50.3% (-3 to 118.4%)                | 0.3 (0.2–0.4)            | -22% (-43 to 6.7%)                  |
|                                         | Tetanus                                 | 1 (1–1)                  | -88.4% (-96.7 to -47.6%)            | 0 (0–0)                  | -90.6% (-97.2 to -66.4%)            |
|                                         | Brain and central nervous system cancer | 210 (159–251)            | 137.9% (52.4 to 224.3%)             | 7.2 (5.2–8.7)            | -3.7% (-34.8 to 31.5%)              |
|                                         | Stroke*                                 | 2019 (1740–2286)         | 59.8% (25.5 to 102.3%)              | 122.4 (105.6–138.2)      | -29.1% (-43.5 to -10.1%)            |
|                                         | Ischaemic stroke                        | 1511 (1288–1720)         | 89.4% (48.2 to 142.7%)              | 96.5 (82–109.6)          | -15.9% (-33 to 6.2%)                |
|                                         | Intracerebral haemorrhage               | 468 (395–549)            | 7.6% (-17 to 41.9%)                 | 24.1 (20.3–28)           | -55.6% (-65.6 to -42.4%)            |
|                                         | Subarachnoid haemorrhage                | 40 (32–48)               | 28.5% (-13.1 to 95.7%)              | 1.8 (1.5–2.2)            | -49.4% (-66.2 to -22.8%)            |
|                                         | Neurological disorders†                 | 509 (261–1116)           | 96.8% (60.8 to 145.7%)              | 34.5 (14.9–80.3)         | -6.6% (-22.6 to 16.4%)              |
|                                         | Alzheimer's disease and other dementias | 326 (76–926)             | 98% (65.5 to 145%)                  | 25.9 (6.1–72.1)          | -6.1% (-21 to 15.6%)                |
|                                         | Parkinson's disease                     | 92 (61–107)              | 118.5% (64.7 to 206.9%)             | 6.2 (4.7–7.2)            | -2.5% (-26.2 to 36.2%)              |
|                                         | Idiopathic epilepsy                     | 63 (54–77)               | 56.4% (16.7 to 142.5%)              | 1.6 (1.4–2)              | -29.9% (-47.5 to 3%)                |
|                                         | Oman                                    | Multiple sclerosis       | 8 (6–12)                            | 214.7% (89.1 to 448.7%)  | 0.2 (0.2–0.4)                       |
| Motor neuron disease                    |                                         | 1 (1–2)                  | 285% (131.8 to 525.1%)              | 0 (0–0.1)                | 50.6% (-15.5 to 165.2%)             |
| Other neurological disorders            |                                         | 17 (15–20)               | 116.4% (43.9 to 267.2%)             | 0.5 (0.4–0.6)            | 15.9% (-19 to 95.8%)                |
| Meningitis                              |                                         | 14 (12–16)               | -52.8% (-65.4 to -32.6%)            | 0.9 (0.8–1.1)            | -64.2% (-73.3 to -49.6%)            |
| Encephalitis                            |                                         | 83 (63–126)              | 21.6% (-19.6 to 83.9%)              | 3.2 (2.5–3.9)            | -43.4% (-62.2 to -9.9%)             |
| Tetanus                                 |                                         | 1 (1–1)                  | -78.3% (-92.1 to -17.8%)            | 0 (0–0)                  | -92.9% (-98.7 to -57.8%)            |
| Brain and central nervous system cancer |                                         | 54 (32–70)               | 176.7% (39.6 to 318.9%)             | 2.1 (1.4–2.6)            | 16.6% (-39 to 73.2%)                |
| Stroke*                                 |                                         | 1030 (895–1196)          | 36.7% (4.9 to 81.9%)                | 103.7 (90.7–118.7)       | -28.8% (-45 to -3.7%)               |
| Ischaemic stroke                        |                                         | 650 (557–758)            | 82.1% (38.5 to 148.3%)              | 76.6 (63.8–89.9)         | -7.7% (-30.7 to 24.4%)              |
| Intracerebral haemorrhage               |                                         | 323 (276–408)            | -1.8% (-25.4 to 31.6%)              | 24 (20.4–30.5)           | -56.6% (-67.7 to -40%)              |
| Subarachnoid haemorrhage                |                                         | 58 (37–98)               | -15.5% (-50.8 to 71.4%)             | 3.1 (1.8–4.7)            | -58.1% (-77.1 to -20.2%)            |
| Neurological disorders†                 |                                         | 257 (130–543)            | 131.4% (91.2 to 213.3%)             | 39.1 (17.1–90.1)         | 4.7% (-12.2 to 49.9%)               |
| Alzheimer's disease and other dementias |                                         | 163 (37–446)             | 117.5% (79.4 to 214.4%)             | 28.8 (6.7–81)            | -3.5% (-20.3 to 46.7%)              |
| Parkinson's disease                     | 60 (37–70)                              | 185.9% (105.3 to 287.6%) | 9.1 (4.9–10.7)                      | 44.7% (6.3 to 96%)       |                                     |
| Idiopathic epilepsy                     | 12 (10–17)                              | 42.5% (-3.6 to 152.9%)   | 0.4 (0.3–0.5)                       | -37.8% (-56.6 to -1.6%)  |                                     |
| Multiple sclerosis                      | 8 (4–12)                                | 248.6% (73.1 to 534.5%)  | 0.3 (0.1–0.4)                       | 16.2% (-42.4 to 115.1%)  |                                     |
| Motor neuron disease                    | 2 (1–3)                                 | 235.5% (71.8 to 471.5%)  | 0.1 (0–0.1)                         | 25.2% (-37.3 to 123.4%)  |                                     |
| Other neurological disorders            | 13 (10–16)                              | 215.4% (88.9 to 389%)    | 0.5 (0.4–0.6)                       | 62.6% (1.1 to 157.2%)    |                                     |
| Qatar                                   | Meningitis                              | 5 (4–7)                  | 8.8% (-31.3 to 63%)                 | 0.6 (0.4–0.8)            | -73.4% (-84.2 to -60.4%)            |
|                                         | Encephalitis                            | 4 (3–6)                  | 299.1% (154.3 to 482.7%)            | 0.3 (0.2–0.4)            | -24.6% (-49 to 11.7%)               |
|                                         | Tetanus                                 | 0 (0–0)                  | 225.3% (13.4 to 520.2%)             | 0 (0–0)                  | -50.7% (-85.6 to 38.3%)             |
|                                         | Brain and central nervous system cancer | 37 (24–62)               | 485.3% (234.8 to 814.8%)            | 2.8 (2.1–4)              | -16.8% (-46.7 to 21.7%)             |

**Table S12** Burden, mortality, incidence, and prevalence of neurological conditions in North Africa and Middle East countries

| Measure                                 |                                         | All Ages                 |                           | Age-standardised         |                          |
|-----------------------------------------|-----------------------------------------|--------------------------|---------------------------|--------------------------|--------------------------|
|                                         |                                         | Number                   | Percent change            | Rate per 100,000         | Percent change           |
| Cause                                   | Location                                | 2019                     | From 1990 to 2019         | 2019                     | From 1990 to 2019        |
|                                         |                                         | Mean (95% UI)            | Mean (95% UI)             | Mean (95% UI)            | Mean (95% UI)            |
| Saudi Arabia                            | Stroke*                                 | 181 (136–239)            | 197.2% (112.5 to 306.7%)  | 52.9 (42.5–69.2)         | -36.7% (-54 to -15.7%)   |
|                                         | Ischaemic stroke                        | 70 (53–97)               | 195.5% (108.4 to 300.9%)  | 36.9 (29.4–48.4)         | -28.6% (-47.9 to -4.3%)  |
|                                         | Intracerebral haemorrhage               | 77 (57–106)              | 187.7% (95.8 to 302.8%)   | 12.6 (9.8–16.3)          | -49.3% (-64 to -28.1%)   |
|                                         | Subarachnoid haemorrhage                | 34 (24–46)               | 225.6% (85.7 to 425.6%)   | 3.5 (2.6–4.8)            | -51.2% (-72.8 to -12.8%) |
|                                         | Neurological disorders†                 | 83 (46–161)              | 390.2% (267.2 to 553.5%)  | 40.3 (18.1–90.3)         | 10.9% (-10.4 to 40.8%)   |
|                                         | Alzheimer's disease and other dementias | 41 (10–120)              | 409.8% (276.9 to 594.1%)  | 27.9 (6.5–76)            | 5.8% (-14.1 to 28.2%)    |
|                                         | Parkinson's disease                     | 19 (13–26)               | 450.7% (294.9 to 662.2%)  | 11.1 (6.5–14.7)          | 35.3% (1.2 to 78.3%)     |
|                                         | Idiopathic epilepsy                     | 11 (8–15)                | 269.9% (170.8 to 453.3%)  | 0.5 (0.4–0.7)            | -40.4% (-55.9 to -15.8%) |
|                                         | Multiple sclerosis                      | 2 (1–3)                  | 594.2% (327.3 to 934.6%)  | 0.1 (0.1–0.1)            | -14.3% (-44.8 to 29.6%)  |
|                                         | Motor neuron disease                    | 1 (1–1)                  | 697.7% (382.4 to 1191.9%) | 0 (0–0.1)                | -4.2% (-46 to 63.4%)     |
|                                         | Other neurological disorders            | 9 (6–12)                 | 348.7% (207 to 595.6%)    | 0.7 (0.5–0.9)            | -10.8% (-38 to 41.8%)    |
|                                         | Meningitis                              | 180 (134–240)            | -30.7% (-49.2 to -1.3%)   | 0.9 (0.7–1.1)            | -69.7% (-77.9 to -55.6%) |
|                                         | Syrian Arab Republic                    | Encephalitis             | 186 (137–254)             | 19% (-19 to 87.5%)       | 0.7 (0.6–0.9)            |
| Tetanus                                 |                                         | 14 (5–25)                | -91.4% (-98.9 to -52.9%)  | 0 (0–0.1)                | -95.5% (-99.1 to -73.3%) |
| Brain and central nervous system cancer |                                         | 597 (437–915)            | 291.2% (111.7 to 651%)    | 2.3 (1.7–3.5)            | 32.8% (-27.6 to 148.5%)  |
| Stroke*                                 |                                         | 12669 (9750–15359)       | 83.2% (32.6 to 152.7%)    | 102.7 (80.4–120.5)       | -32.5% (-49.1 to -10%)   |
| Ischaemic stroke                        |                                         | 7034 (5262–8441)         | 93.4% (39.7 to 159.4%)    | 70.1 (53.5–82.2)         | -22.8% (-41.9 to 2.1%)   |
| Intracerebral haemorrhage               |                                         | 5292 (3981–6647)         | 74.4% (23.4 to 158.7%)    | 31.1 (24–37.4)           | -46.3% (-60.6 to -22.4%) |
| Subarachnoid haemorrhage                |                                         | 344 (235–473)            | 41.4% (-22.5 to 148.8%)   | 1.5 (1.1–2)              | -57.5% (-76.8 to -25.9%) |
| Neurological disorders†                 |                                         | 3083 (1725–5891)         | 116.5% (71.7 to 197.8%)   | 36.3 (16.7–78.1)         | -1.9% (-19.5 to 35.2%)   |
| Alzheimer's disease and other dementias |                                         | 1707 (411–4518)          | 106.2% (67.4 to 196.6%)   | 26.3 (6.3–68.4)          | -2.1% (-19.6 to 41%)     |
| Parkinson's disease                     |                                         | 562 (414–665)            | 108% (58.2 to 207.5%)     | 7.3 (5–8.7)              | 0.2% (-22.2 to 47.7%)    |
| Idiopathic epilepsy                     |                                         | 602 (439–838)            | 141.4% (41.8 to 298.1%)   | 1.8 (1.4–2.4)            | -14.4% (-49.4 to 37.2%)  |
| Multiple sclerosis                      |                                         | 40 (27–60)               | 348.6% (142.5 to 1082.3%) | 0.1 (0.1–0.2)            | 17.7% (-33.3 to 198.9%)  |
| Motor neuron disease                    |                                         | 20 (13–29)               | 287.5% (87 to 737.1%)     | 0.1 (0.1–0.1)            | 24% (-40.7 to 186.8%)    |
| Other neurological disorders            | 151 (115–201)                           | 143.7% (49.6 to 327.5%)  | 0.7 (0.5–0.8)             | 19.2% (-23.7 to 114.1%)  |                          |
| Meningitis                              | 214 (165–276)                           | -74.4% (-82.4 to -63.1%) | 1.7 (1.4–2.2)             | -64.9% (-74.9 to -51.9%) |                          |
| Encephalitis                            | 59 (44–82)                              | -42.5% (-64.6 to 1.8%)   | 0.5 (0.4–0.7)             | -40.9% (-61.5 to -1.3%)  |                          |
| Tetanus                                 | 5 (3–11)                                | -96.4% (-98.9 to -86.6%) | 0 (0–0.1)                 | -93.7% (-98 to -78.8%)   |                          |
| Brain and central nervous system cancer | 566 (388–768)                           | 73.8% (6.8 to 160.3%)    | 4.5 (3–6)                 | -2.6% (-34 to 43.1%)     |                          |
| Stroke*                                 | 9186 (7117–11838)                       | 24.4% (-8.8 to 68.6%)    | 99 (78.3–124.9)           | -32.2% (-50.2 to -8.6%)  |                          |
| Ischaemic stroke                        | 4954 (3849–6348)                        | 58.3% (10.8 to 111.7%)   | 58.3 (46.2–73.1)          | -20.6% (-42.8 to 6.2%)   |                          |
| Intracerebral haemorrhage               | 3895 (2952–5174)                        | 11.3% (-20.6 to 55.8%)   | 37.9 (29.1–49.4)          | -42.3% (-58.3 to -20.1%) |                          |
| Subarachnoid haemorrhage                | 336 (250–438)                           | -55.5% (-70.1 to -25.7%) | 2.8 (2.1–3.7)             | -59.5% (-73.3 to -35.3%) |                          |
| Neurological disorders†                 | 2208 (956–5130)                         | 77.4% (35.5 to 138.7%)   | 33 (13.1–78.3)            | 4.9% (-16 to 40%)        |                          |
| Alzheimer's disease and other dementias | 1592 (368–4596)                         | 75% (34.9 to 142.1%)     | 26 (6.3–70.3)             | 3.1% (-18.3 to 44.3%)    |                          |
| Parkinson's disease                     | 434 (286–555)                           | 151% (86.5 to 240.1%)    | 5.7 (3.7–7.2)             | 21.1% (-8.4 to 61.8%)    |                          |
| Idiopathic epilepsy                     | 87 (63–117)                             | -8.3% (-37.9 to 63.4%)   | 0.6 (0.5–0.8)             | -33.3% (-53.5 to 12.7%)  |                          |
| Multiple sclerosis                      | 18 (12–25)                              | 123.7% (39.3 to 273.7%)  | 0.1 (0.1–0.2)             | 4.4% (-34.3 to 71.8%)    |                          |
| Motor neuron disease                    | 10 (6–17)                               | 187.2% (55.7 to 392%)    | 0.1 (0–0.1)               | 34.7% (-25.8 to 136.8%)  |                          |
| Other neurological disorders            | 67 (52–86)                              | 21.2% (-17.9 to 89.9%)   | 0.6 (0.4–0.7)             | 12.7% (-21.6 to 76.8%)   |                          |
| Tunisia                                 | Meningitis                              | 85 (61–115)              | -61.5% (-75.4 to -40.8%)  | 0.8 (0.6–1)              | -69.3% (-79.3 to -55.4%) |



**Table S12** Burden, mortality, incidence, and prevalence of neurological conditions in North Africa and Middle East countries

| Measure              |                                         | All Ages            |                            | Age-standardised  |                          |
|----------------------|-----------------------------------------|---------------------|----------------------------|-------------------|--------------------------|
|                      |                                         | Number              | Percent change             | Rate per 100,000  | Percent change           |
| Cause                | Location                                | 2019                | From 1990 to 2019          | 2019              | From 1990 to 2019        |
|                      |                                         | Mean (95% UI)       | Mean (95% UI)              | Mean (95% UI)     | Mean (95% UI)            |
|                      | Encephalitis                            | 36 (23–72)          | 8·4% (-32·7 to 62·4%)      | 0·3 (0·2–0·6)     | -23·8% (-48·9 to 11·9%)  |
|                      | Tetanus                                 | 2 (1–5)             | -75·5% (-90·8 to -38·4%)   | 0 (0–0)           | -80·6% (-92·5 to -51·2%) |
|                      | Brain and central nervous system cancer | 138 (94–186)        | 91·6% (22·4 to 175·2%)     | 1·1 (0·8–1·5)     | 0·5% (-34·6 to 44·2%)    |
|                      | Stroke*                                 | 8713 (6627–11147)   | 114·5% (59 to 186%)        | 80 (60·6–101·4)   | -25% (-43·8 to -0·6%)    |
|                      | Ischaemic stroke                        | 6748 (5045–8677)    | 204·9% (114·3 to 304·8%)   | 63·2 (47·3–80·4)  | -2·2% (-29·8 to 27·8%)   |
|                      | Intracerebral haemorrhage               | 1692 (1254–2247)    | 10·3% (-23·7 to 59·9%)     | 14·5 (10·8–19·1)  | -59·4% (-71·5 to -41·3%) |
|                      | Subarachnoid haemorrhage                | 273 (186–385)       | -13·3% (-48·6 to 52·4%)    | 2·3 (1·6–3·2)     | -64·2% (-79·3 to -35·6%) |
|                      | Neurological disorders†                 | 3229 (1267–7379)    | 225·2% (139 to 332·1%)     | 32·7 (12·4–75·9)  | -2·1% (-22·3 to 32·4%)   |
|                      | Alzheimer's disease and other dementias | 2547 (597–6753)     | 270·1% (189 to 428%)       | 26·5 (6·3–70·3)   | -2·8% (-22·7 to 37%)     |
|                      | Parkinson's disease                     | 485 (356–646)       | 237·3% (150·4 to 341·6%)   | 4·6 (3·4–6)       | 12% (-16·4 to 45·8%)     |
|                      | Idiopathic epilepsy                     | 101 (71–139)        | -17% (-43·8 to 26%)        | 0·9 (0·6–1·2)     | -40·6% (-58·7 to -11·3%) |
|                      | Multiple sclerosis                      | 35 (18–52)          | 178·5% (75·4 to 355·8%)    | 0·3 (0·1–0·4)     | 24·3% (-22 to 102·2%)    |
|                      | Motor neuron disease                    | 9 (6–13)            | 178·8% (57·8 to 386·7%)    | 0·1 (0–0·1)       | 25·3% (-30 to 119·5%)    |
|                      | Other neurological disorders            | 53 (38–72)          | 121·4% (46 to 215%)        | 0·4 (0·3–0·6)     | 35·9% (-9 to 91·1%)      |
| Türkiye              | Meningitis                              | 351 (288–422)       | -85·3% (-90·5 to -77·2%)   | 0·5 (0·4–0·6)     | -86·7% (-91·2 to -80·4%) |
|                      | Encephalitis                            | 231 (179–287)       | -31% (-56·3 to 4·8%)       | 0·3 (0·2–0·4)     | -50·3% (-66·7 to -25·5%) |
|                      | Tetanus                                 | 16 (11–23)          | -97·7% (-98·6 to -94·1%)   | 0 (0–0)           | -98·7% (-99·3 to -96%)   |
|                      | Brain and central nervous system cancer | 4074 (1833–5724)    | 74·1% (-4·1 to 156·7%)     | 4·7 (2·1–6·6)     | -10·8% (-48·4 to 27·2%)  |
|                      | Stroke*                                 | 48947 (39204–59511) | 121% (59 to 179·6%)        | 60·6 (48·7–73·6)  | -16·5% (-39·5 to 6·2%)   |
|                      | Ischaemic stroke                        | 30216 (24111–36742) | 173·4% (88·9 to 259·4%)    | 38·3 (30·5–46·5)  | -3·7% (-32·5 to 26·5%)   |
|                      | Intracerebral haemorrhage               | 15611 (12430–19184) | 74·2% (26 to 123·4%)       | 18·7 (15–22·9)    | -30·5% (-49 to -9·9%)    |
|                      | Subarachnoid haemorrhage                | 3120 (2421–3942)    | 46·3% (-11·3 to 180·6%)    | 3·6 (2·8–4·5)     | -39·1% (-63·8 to 20·4%)  |
|                      | Neurological disorders†                 | 26636 (12094–60752) | 137·3% (80 to 193·6%)      | 34·5 (15·5–78·3)  | -6·9% (-22·9 to 11·4%)   |
|                      | Alzheimer's disease and other dementias | 19721 (5070–53643)  | 190·5% (141·7 to 254%)     | 25·8 (6·6–70)     | -3·8% (-20·1 to 16·3%)   |
|                      | Parkinson's disease                     | 3838 (2916–7139)    | 164·1% (106 to 229·6%)     | 4·9 (3·7–9·1)     | -6·8% (-27 to 16·1%)     |
|                      | Idiopathic epilepsy                     | 1361 (1110–1654)    | -17% (-41·6 to 61·2%)      | 1·7 (1·4–2·1)     | -34·1% (-56·8 to 25·7%)  |
|                      | Multiple sclerosis                      | 206 (151–292)       | 53·9% (-13·4 to 151·5%)    | 0·2 (0·2–0·3)     | -23·2% (-53·2 to 26%)    |
|                      | Motor neuron disease                    | 624 (481–789)       | 44·6% (-12·4 to 119·7%)    | 0·8 (0·6–0·9)     | -4·7% (-38·7 to 39·2%)   |
|                      | Other neurological disorders            | 886 (723–1085)      | 14·3% (-17·1 to 60·8%)     | 1·1 (0·9–1·4)     | -14·7% (-36·2 to 19%)    |
| United Arab Emirates | Meningitis                              | 54 (32–80)          | 70·1% (4·9 to 145·4%)      | 0·8 (0·5–1·2)     | -67·5% (-76·9 to -58·1%) |
|                      | Encephalitis                            | 25 (13–53)          | 294% (144·7 to 494·9%)     | 0·3 (0·2–0·6)     | -18·7% (-41·6 to 15·4%)  |
|                      | Tetanus                                 | 33 (12–55)          | 2·1% (-78·1 to 288·8%)     | 2 (0·3–3·5)       | -85·5% (-95·9 to -33·6%) |
|                      | Brain and central nervous system cancer | 314 (180–465)       | 572·5% (332·1 to 902·9%)   | 4·2 (2·6–5·7)     | -6·6% (-43·9 to 46·8%)   |
|                      | Stroke*                                 | 2168 (1544–3026)    | 348·7% (202 to 555%)       | 91·3 (70·2–118·7) | -50% (-62 to -34·9%)     |
|                      | Ischaemic stroke                        | 1240 (891–1675)     | 458·2% (277·6 to 709·3%)   | 71·4 (55·2–91·1)  | -41·1% (-55·1 to -23·6%) |
|                      | Intracerebral haemorrhage               | 812 (534–1257)      | 264·2% (123 to 462·5%)     | 17·9 (12·5–27·2)  | -67·8% (-77·7 to -54·3%) |
|                      | Subarachnoid haemorrhage                | 117 (53–208)        | 205·7% (71·8 to 453·8%)    | 2 (0·9–3·2)       | -65·2% (-78·1 to -42·5%) |
|                      | Neurological disorders†                 | 541 (352–839)       | 544% (363·6 to 791·4%)     | 35·6 (16·8–76·6)  | -7% (-22·2 to 23·5%)     |
|                      | Alzheimer's disease and other dementias | 138 (31–390)        | 496·6% (359·4 to 708·4%)   | 24·2 (5·9–64·2)   | -6·1% (-19·9 to 26·8%)   |
|                      | Parkinson's disease                     | 90 (60–123)         | 527·4% (356 to 824·1%)     | 8 (4·8–10·4)      | -12·8% (-32·3 to 23·5%)  |
|                      | Idiopathic epilepsy                     | 141 (86–220)        | 340·1% (173·1 to 610·8%)   | 1·4 (0·9–2·1)     | -31·9% (-52·9 to 1·1%)   |
|                      | Multiple sclerosis                      | 44 (20–80)          | 1132·7% (586·4 to 1830·3%) | 0·4 (0·2–0·7)     | 24·9% (-27·7 to 81·3%)   |

**Table S12** Burden, mortality, incidence, and prevalence of neurological conditions in North Africa and Middle East countries

| Measure     |                                         | All Ages            |                                     | Age-standardised         |                                     |
|-------------|-----------------------------------------|---------------------|-------------------------------------|--------------------------|-------------------------------------|
|             |                                         | Number<br>2019      | Percent change<br>From 1990 to 2019 | Rate per 100,000<br>2019 | Percent change<br>From 1990 to 2019 |
| Cause       | Location                                | Mean (95% UI)       | Mean (95% UI)                       | Mean (95% UI)            | Mean (95% UI)                       |
| Yemen       | Motor neuron disease                    | 13 (5–26)           | 1180.6% (407.6 to 2470.6%)          | 0.2 (0.1–0.3)            | 24.9% (-49.3 to 143.6%)             |
|             | Other neurological disorders            | 115 (69–173)        | 1061.4% (587.3 to 1672.4%)          | 1.5 (0.9–2.1)            | 67.4% (6.1 to 138.3%)               |
|             | Meningitis                              | 479 (330–684)       | -47.4% (-66.3 to -19.7%)            | 2 (1.4–2.7)              | -60.2% (-72 to -44.3%)              |
|             | Encephalitis                            | 148 (86–291)        | 62.9% (-5.7 to 178.4%)              | 0.5 (0.3–1)              | -2% (-33.4 to 47.6%)                |
|             | Tetanus                                 | 58 (27–119)         | -83.6% (-94.6 to -35.4%)            | 0.2 (0.1–0.5)            | -87.7% (-95.1 to -59.4%)            |
|             | Brain and central nervous system cancer | 653 (398–950)       | 174.2% (48.6 to 386.6%)             | 3.4 (2.2–5.1)            | 21.7% (-29.2 to 93%)                |
|             | Stroke*                                 | 14375 (10909–18865) | 108.6% (63.7 to 174.6%)             | 135.7 (102.4–176.6)      | -22.1% (-38.2 to 0.7%)              |
|             | Ischaemic stroke                        | 8921 (6871–11744)   | 247.2% (169.8 to 350.3%)            | 93.3 (71.2–121.2)        | 16.4% (-7.7 to 47.9%)               |
|             | Intracerebral haemorrhage               | 4607 (3395–6206)    | 25.2% (-7.6 to 69.9%)               | 36 (26.8–46.8)           | -55.8% (-66.7 to -40.7%)            |
|             | Subarachnoid haemorrhage                | 846 (418–1437)      | 31.6% (-6.7 to 111.7%)              | 6.4 (3.2–11.1)           | -49.2% (-63.4 to -17.8%)            |
|             | Neurological disorders†                 | 2651 (1275–5794)    | 170% (94.7 to 258.2%)               | 32.1 (12.5–77.4)         | 1.8% (-13.6 to 25.9%)               |
|             | Alzheimer's disease and other dementias | 1731 (403–4750)     | 227.9% (174.9 to 303.6%)            | 25.5 (6.2–71.1)          | 0.7% (-14 to 21.5%)                 |
|             | Parkinson's disease                     | 413 (322–540)       | 246% (169.5 to 358.9%)              | 4.6 (3.6–6)              | 21.9% (-3.2 to 58.7%)               |
|             | Idiopathic epilepsy                     | 382 (251–536)       | 31.4% (-15 to 180.6%)               | 1.4 (0.9–1.9)            | -29.8% (-52.2 to 19.6%)             |
|             | Multiple sclerosis                      | 41 (20–67)          | 270.7% (103.4 to 567.6%)            | 0.2 (0.1–0.3)            | 28.9% (-26.4 to 121.5%)             |
| Afghanistan | Motor neuron disease                    | 7 (5–11)            | 223% (90.7 to 460.4%)               | 0 (0–0.1)                | 24% (-31.2 to 125.4%)               |
|             | Other neurological disorders            | 76 (54–108)         | 151.4% (47.2 to 333.8%)             | 0.3 (0.3–0.5)            | 34.3% (-13.1 to 129%)               |
|             | Meningitis                              | 1563 (1134–2159)    | -27.6% (-52 to 6.8%)                | 4.3 (3.1–5.7)            | -67.3% (-77.2 to -55.4%)            |
|             | Encephalitis                            | 1016 (727–1612)     | 124.7% (57.2 to 209%)               | 4.8 (3.6–6.2)            | -11.1% (-36.6 to 19.6%)             |
|             | Tetanus                                 | 792 (476–1309)      | -73.8% (-86.9 to -43.4%)            | 2.5 (1.4–3.8)            | -87.7% (-92.8 to -77.3%)            |
|             | Brain and central nervous system cancer | 1014 (569–1848)     | 140.1% (58 to 293.1%)               | 4.7 (2.8–8.5)            | 3.2% (-32.7 to 59.4%)               |
|             | Stroke*                                 | 16816 (11747–21934) | 39.3% (7.3 to 74.3%)                | 161.5 (110.3–208.5)      | -18.7% (-36.1 to -1.6%)             |
|             | Ischaemic stroke                        | 8673 (6211–11616)   | 107.2% (59.7 to 164.3%)             | 98 (69.2–129.4)          | 23.6% (-3.3 to 55.2%)               |
|             | Intracerebral haemorrhage               | 6961 (4904–9333)    | 2.4% (-23.5 to 35.6%)               | 54.1 (36.6–72.4)         | -47.4% (-60 to -33.1%)              |
|             | Subarachnoid haemorrhage                | 1183 (363–2053)     | 8.3% (-24.9 to 76.4%)               | 9.4 (2.8–17)             | -42.7% (-58.3 to -11.8%)            |
|             | Neurological disorders†                 | 3434 (1983–6537)    | 62.7% (37.1 to 99.1%)               | 41.1 (17.7–92.4)         | -6.7% (-22.5 to 7.6%)               |
|             | Alzheimer's disease and other dementias | 1775 (422–4801)     | 59.1% (32 to 85.4%)                 | 30.8 (7.5–82.3)          | -3.3% (-18.5 to 10%)                |
|             | Parkinson's disease                     | 560 (431–715)       | 50.8% (17.4 to 90.2%)               | 6.8 (5.3–8.5)            | -2.3% (-22.7 to 20.3%)              |
|             | Idiopathic epilepsy                     | 860 (434–1211)      | 62% (19.4 to 184.5%)                | 2.5 (1.3–3.5)            | -41.3% (-55 to -8.7%)               |
|             | Multiple sclerosis                      | 90 (36–205)         | 186.7% (81 to 382.9%)               | 0.4 (0.2–0.9)            | 8.8% (-28.9 to 66.6%)               |
| Sudan       | Motor neuron disease                    | 11 (8–17)           | 92.7% (24.9 to 201.1%)              | 0.1 (0–0.1)              | -8.7% (-41.4 to 43.1%)              |
|             | Other neurological disorders            | 138 (101–185)       | 151.2% (77.1 to 268.8%)             | 0.5 (0.4–0.7)            | 5.5% (-23.1 to 49.9%)               |
|             | Meningitis                              | 662 (452–951)       | -76.6% (-84.7 to -64.3%)            | 1.9 (1.3–2.5)            | -80.2% (-86.3 to -71.3%)            |
|             | Encephalitis                            | 198 (115–375)       | 23.2% (-32.4 to 123.2%)             | 0.5 (0.3–1)              | -15.8% (-47.2 to 30.9%)             |
|             | Tetanus                                 | 38 (18–82)          | -91.8% (-96.7 to -76.9%)            | 0.1 (0.1–0.2)            | -93.1% (-97 to -85.4%)              |
|             | Brain and central nervous system cancer | 961 (600–1387)      | 93.2% (-1.7 to 278.8%)              | 3.6 (2.3–5.1)            | 8.2% (-38.1 to 84%)                 |
|             | Stroke*                                 | 19638 (14425–27765) | 34.7% (8.4 to 70%)                  | 125.2 (92.6–174.9)       | -29.4% (-42.2 to -12%)              |
|             | Ischaemic stroke                        | 13107 (9770–18878)  | 115.4% (70.7 to 171.4%)             | 90.3 (66.7–129)          | 4.9% (-14.6 to 29.6%)               |
|             | Intracerebral haemorrhage               | 5660 (3818–7963)    | -21.7% (-40.6 to 3.9%)              | 30.4 (20.9–42.2)         | -61.5% (-70.1 to -49%)              |
|             | Subarachnoid haemorrhage                | 872 (472–1495)      | -31.1% (-52.4 to 35.5%)             | 4.5 (2.4–7.6)            | -63.4% (-75.2 to -30.9%)            |
|             | Neurological disorders†                 | 4356 (2098–9385)    | 85% (31.1 to 138.4%)                | 31.4 (13–72.5)           | -6.9% (-21.2 to 10.2%)              |
|             | Alzheimer's disease and other dementias | 2815 (663–8000)     | 132.5% (103.4 to 176.2%)            | 23.9 (5.6–66)            | -5.1% (-16.2 to 11.2%)              |

**Table S12** Burden, mortality, incidence, and prevalence of neurological conditions in North Africa and Middle East countries

|                              |                                         | All Ages                        |                                     | Age-standardised         |                                     |
|------------------------------|-----------------------------------------|---------------------------------|-------------------------------------|--------------------------|-------------------------------------|
|                              |                                         | Number<br>2019                  | Percent change<br>From 1990 to 2019 | Rate per 100,000<br>2019 | Percent change<br>From 1990 to 2019 |
| Measure                      | Location                                | Mean (95% UI)                   | Mean (95% UI)                       | Mean (95% UI)            | Mean (95% UI)                       |
|                              | Parkinson's disease                     | 710 (557–898)                   | 94·9% (46·1 to 165·3%)              | 5·2 (4·1–6·5)            | 0·1% (-24·7 to 36·8%)               |
|                              | Idiopathic epilepsy                     | 592 (383–816)                   | -13·4% (-49·1 to 109·2%)            | 1·6 (1–2·1)              | -45·5% (-65·4 to 4·4%)              |
|                              | Multiple sclerosis                      | 56 (25–89)                      | 166·2% (46·7 to 377·5%)             | 0·2 (0·1–0·3)            | 19·7% (-31·4 to 105·2%)             |
|                              | Motor neuron disease                    | 12 (8–17)                       | 147·7% (49·3 to 304·6%)             | 0·1 (0–0·1)              | 21·6% (-27·9 to 102·9%)             |
|                              | Other neurological disorders            | 171 (111–248)                   | 145·6% (34·7 to 301·2%)             | 0·5 (0·4–0·8)            | 57·6% (-3·2 to 131·8%)              |
| <b>Incidence</b>             |                                         |                                 |                                     |                          |                                     |
| Global                       | Meningitis                              | 2507224 (2113069–2988698)       | -23·8% (-26·5 to -20·4%)            | 35·4 (29·6–42·5)         | -35·9% (-37 to -34·6%)              |
|                              | Encephalitis                            | 1444722 (1280147–1614941)       | 12·5% (8·1 to 17·1%)                | 19·3 (17·1–21·7)         | -16·5% (-17·8 to -15·2%)            |
|                              | Tetanus                                 | 73662 (53347–101149)            | -88% (-91·1 to -83·2%)              | 1 (0·7–1·4)              | -90% (-92·4 to -86·1%)              |
|                              | Brain and central nervous system cancer | 347992 (262084–388896)          | 94·4% (22 to 128·3%)                | 4·3 (3·3–4·9)            | 13·8% (-27·3 to 32·8%)              |
|                              | Stroke*                                 | 12224551 (11041816–13589312)    | 70·1% (66·6 to 73·4%)               | 150·8 (136·5–167·5)      | -16·9% (-18·4 to -15·3%)            |
|                              | Ischaemic stroke                        | 7630803 (6569220–8960358)       | 87·6% (83·5 to 91·7%)               | 94·5 (81·9–110·8)        | -10% (-12 to -8%)                   |
|                              | Intracerebral haemorrhage               | 3409122 (2970474–3909194)       | 43·2% (40·7 to 45·5%)               | 41·8 (36·5–47·9)         | -29·2% (-30·5 to -27·8%)            |
|                              | Subarachnoid haemorrhage                | 1184625 (1005873–1390420)       | 60·7% (56·5 to 64·7%)               | 14·5 (12·3–16·9)         | -16·9% (-18·8 to -15·3%)            |
|                              | Neurological disorders†                 | 805178458 (725838131–888847392) | 49·1% (46·1 to 52·4%)               | 10259·5 (9223·2–11324·2) | -0·1% (-0·6 to 0·5%)                |
|                              | Alzheimer's disease and other dementias | 7236385 (6217239–8232672)       | 147·7% (142 to 153·6%)              | 95 (81·6–107·9)          | 1·5% (0·2 to 2·8%)                  |
|                              | Parkinson's disease                     | 1081723 (953265–1211202)        | 159·7% (153 to 167%)                | 13·4 (11·8–15)           | 19·6% (17 to 22·3%)                 |
|                              | Idiopathic epilepsy                     | 2898222 (2098718–3823376)       | 55·9% (32·4 to 83·7%)               | 38·8 (28–51·3)           | 16·9% (0·1 to 36·5%)                |
|                              | Multiple sclerosis                      | 59345 (51818–66943)             | 41·8% (37·7 to 45·7%)               | 0·7 (0·6–0·8)            | -7·3% (-8·7 to -5·8%)               |
|                              | Migraine                                | 87648969 (76635688–98654602)    | 40% (36·8 to 43·5%)                 | 1142·5 (995·9–1289·4)    | 2·1% (1·1 to 2·8%)                  |
|                              | Tension-type headache                   | 706190114 (626723555–788575302) | 49·6% (46·2 to 53·3%)               | 8968·2 (7931·9–9990·5)   | -0·4% (-1 to 0·2%)                  |
|                              | Motor neuron disease                    | 63700 (57296–71343)             | 79% (74·1 to 84%)                   | 0·8 (0·7–0·9)            | 0·3% (-0·4 to 0·9%)                 |
|                              | Other neurological disorders            | 0 (0–0)                         | 0% (0 to 0%)                        | 0 (0–0)                  | 0% (0 to 0%)                        |
|                              | Headache disorders                      | 793839083 (714299832–877018808) | 48·5% (45·4 to 51·7%)               | 10110·7 (9070·7–11167·1) | -0·2% (-0·7 to 0·4%)                |
| North Africa and Middle East | Meningitis                              | 128547 (106665–152723)          | -9·9% (-16·3 to -1·9%)              | 22·5 (18·9–26·4)         | -37% (-39·9 to -33·9%)              |
|                              | Encephalitis                            | 58113 (49849–67005)             | 46·2% (40·2 to 53·3%)               | 9·9 (8·5–11·3)           | -4·4% (-5·8 to -3%)                 |
|                              | Tetanus                                 | 1860 (1177–2923)                | -83% (-90·6 to -68%)                | 0·3 (0·2–0·5)            | -88·4% (-92·9 to -79%)              |
|                              | Brain and central nervous system cancer | 27529 (18554–32579)             | 152·5% (49·6 to 233·1%)             | 5·2 (3·5–6·1)            | 28% (-19·6 to 63·3%)                |
|                              | Stroke*                                 | 829803 (758352–912812)          | 130·7% (124·4 to 137·7%)            | 183 (166·7–201·7)        | -5·4% (-7·4 to -3·3%)               |
|                              | Ischaemic stroke                        | 602510 (531317–682539)          | 166·9% (157·2 to 177·2%)            | 135·5 (119·7–153·6)      | 8·8% (6·3 to 11·4%)                 |
|                              | Intracerebral haemorrhage               | 163240 (149166–179814)          | 65·1% (60·7 to 69·7%)               | 35 (31·8–38·6)           | -32·6% (-34·5 to -30·6%)            |
|                              | Subarachnoid haemorrhage                | 64053 (54559–75578)             | 82·9% (75·3 to 92·5%)               | 12·5 (10·7–14·7)         | -26·4% (-29·2 to -23·3%)            |
|                              | Neurological disorders†                 | 61542741 (54639556–68418425)    | 89·1% (82·4 to 95·8%)               | 10090·8 (9024·1–11159·3) | 0·8% (0 to 1·6%)                    |
|                              | Alzheimer's disease and other dementias | 361192 (309692–413138)          | 177·5% (171·2 to 184·3%)            | 110·2 (93·9–125·6)       | 0·8% (-0·7 to 2·6%)                 |
|                              | Parkinson's disease                     | 42804 (38332–47338)             | 192·5% (184·3 to 201·9%)            | 11·4 (10·3–12·5)         | 12·7% (9·9 to 15·7%)                |
|                              | Idiopathic epilepsy                     | 295453 (195044–407682)          | 67·4% (20·3 to 135·5%)              | 48·2 (32·2–66·4)         | 8·3% (-21·5 to 51·4%)               |

**Table S12** Burden, mortality, incidence, and prevalence of neurological conditions in North Africa and Middle East countries

| Measure                      | Cause                                   | Location                  | All Ages                     |                          | Age-standardised        |                          |
|------------------------------|-----------------------------------------|---------------------------|------------------------------|--------------------------|-------------------------|--------------------------|
|                              |                                         |                           | Number                       | Percent change           | Rate per 100,000        | Percent change           |
|                              |                                         |                           | 2019                         | From 1990 to 2019        | 2019                    | From 1990 to 2019        |
|                              |                                         | Mean (95% UI)             | Mean (95% UI)                | Mean (95% UI)            | Mean (95% UI)           |                          |
| Algeria                      | Multiple sclerosis                      |                           | 9218 (7879–10525)            | 120% (110 to 129·4%)     | 1·4 (1·2–1·6)           | 5·5% (4 to 6·8%)         |
|                              | Migraine                                |                           | 7950885 (6837588–9083619)    | 70·6% (62·7 to 79·1%)    | 1238·9 (1063·5–1415·6)  | 0·4% (-0·7 to 1·6%)      |
|                              | Tension-type headache                   |                           | 52879780 (46137009–59485212) | 91·9% (84 to 99·8%)      | 8680·1 (7631·6–9732·5)  | 0·9% (-0·1 to 1·7%)      |
|                              | Motor neuron disease                    |                           | 3409 (2881–4056)             | 83·1% (70·8 to 94·9%)    | 0·6 (0·5–0·7)           | 1·9% (0·3 to 3·6%)       |
|                              | Other neurological disorders            |                           | 0 (0–0)                      | 0% (0 to 0%)             | 0 (0–0)                 | 0% (0 to 0%)             |
|                              | Headache disorders                      |                           | 60830665 (53891298–67676102) | 88·8% (82 to 95·6%)      | 9919 (8853·1–10989·5)   | 0·8% (-0·1 to 1·5%)      |
|                              | Meningitis                              |                           | 7858 (6442–9451)             | -5·1% (-13·2 to 4·1%)    | 19·8 (16·4–23·5)        | -33·8% (-38·6 to -28·8%) |
|                              | Encephalitis                            |                           | 3407 (2900–3956)             | 39·9% (30·1 to 49·8%)    | 8·4 (7·2–9·7)           | -2·4% (-6·5 to 1·9%)     |
|                              | Tetanus                                 |                           | 16 (11–32)                   | -75·3% (-90·4 to -33·4%) | 0 (0–0·1)               | -83·1% (-93 to -57·7%)   |
|                              | Brain and central nervous system cancer |                           | 906 (567–1162)               | 136·7% (28·9 to 225·3%)  | 2·3 (1·5–2·9)           | 28% (-30·1 to 75·1%)     |
|                              | Stroke*                                 |                           | 61052 (55145–67937)          | 118·1% (106·4 to 132%)   | 181·7 (164·3–202·2)     | -16·9% (-21·1 to -12·3%) |
|                              | Ischaemic stroke                        |                           | 46561 (40719–53253)          | 161·6% (142·6 to 182·8%) | 140·1 (122·9–160·1)     | -1·4% (-7·3 to 5·6%)     |
|                              | Intracerebral haemorrhage               |                           | 9769 (8701–10901)            | 30·1% (22 to 38%)        | 29·1 (25·8–32·5)        | -49·8% (-53·1 to -46·8%) |
|                              | Subarachnoid haemorrhage                |                           | 4722 (3970–5563)             | 76·1% (61 to 91·9%)      | 12·5 (10·6–14·6)        | -33% (-38·1 to -27·6%)   |
|                              | Neurological disorders†                 |                           | 4123947 (3650397–4589463)    | 72·9% (64·3 to 81·9%)    | 9906·8 (8817·7–10981·7) | -0·1% (-0·6 to 0·4%)     |
|                              | Alzheimer's disease and other dementias |                           | 28168 (23651–32803)          | 222·4% (198·4 to 248%)   | 110 (93·8–126)          | -0·1% (-3·1 to 3·1%)     |
|                              | Parkinson's disease                     |                           | 3215 (2838–3684)             | 200·8% (176·4 to 228·3%) | 11 (9·8–12·3)           | 6·6% (-0·9 to 15·4%)     |
|                              | Idiopathic epilepsy                     |                           | 20216 (5528–34174)           | 44·1% (-64·1 to 502·9%)  | 48·2 (13·1–81·3)        | -0·3% (-74·5 to 315·8%)  |
|                              | Multiple sclerosis                      |                           | 684 (567–810)                | 138·2% (115·5 to 160%)   | 1·5 (1·3–1·8)           | 21·3% (15·6 to 28%)      |
|                              | Migraine                                |                           | 526992 (447986–606761)       | 50·7% (41·4 to 60·7%)    | 1234·6 (1047·1–1422·7)  | 0·1% (0 to 0·1%)         |
| Tension-type headache        |                                         | 3544462 (3089897–4021845) | 76·2% (66·4 to 87%)          | 8501 (7440·7–9578·6)     | -0·1% (-0·1 to -0·1%)   |                          |
| Motor neuron disease         |                                         | 211 (174–254)             | 85·6% (68·4 to 104·6%)       | 0·5 (0·4–0·6)            | 0·8% (-2·8 to 4·5%)     |                          |
| Other neurological disorders |                                         | 0 (0–0)                   | 0% (0 to 0%)                 | 0 (0–0)                  | 0% (0 to 0%)            |                          |
| Headache disorders           |                                         | 4071454 (3596687–4535972) | 72·4% (63·8 to 81·7%)        | 9735·6 (8650–10821·3)    | -0·1% (-0·1 to 0%)      |                          |
| Bahrain                      | Meningitis                              |                           | 208 (165–256)                | 27·6% (9·2 to 50·4%)     | 19·5 (15·7–23·5)        | -46% (-51·2 to -40·6%)   |
|                              | Encephalitis                            |                           | 93 (79–107)                  | 123·8% (102·1 to 145·6%) | 8·2 (7–9·6)             | 0·5% (-3·8 to 4·8%)      |
|                              | Tetanus                                 |                           | 0 (0–0)                      | 71% (-23·8 to 170%)      | 0 (0–0)                 | -39·3% (-73·2 to -5·8%)  |
|                              | Brain and central nervous system cancer |                           | 47 (28–61)                   | 358% (177·2 to 552·5%)   | 3·6 (2·4–4·6)           | 9·6% (-34·1 to 55·8%)    |
|                              | Stroke*                                 |                           | 1236 (1090–1394)             | 240·4% (215·8 to 266·4%) | 113·4 (102·3–126·6)     | -32·8% (-36·8 to -28·7%) |
|                              | Ischaemic stroke                        |                           | 854 (724–1019)               | 261·5% (226·2 to 300·9%) | 82 (71·4–94·5)          | -30·1% (-35·1 to -24·2%) |
|                              | Intracerebral haemorrhage               |                           | 230 (202–261)                | 145·9% (125·7 to 167·4%) | 21·8 (19·3–24·6)        | -46·4% (-50·1 to -43%)   |
|                              | Subarachnoid haemorrhage                |                           | 153 (121–196)                | 354·7% (294·1 to 430·2%) | 9·6 (7·9–11·9)          | -11·1% (-19·6 to 0·8%)   |
|                              | Neurological disorders†                 |                           | 148982 (131155–167732)       | 201·1% (179·3 to 223·1%) | 9902·6 (8826·1–10988·3) | -0·1% (-0·7 to 0·5%)     |
|                              | Alzheimer's disease and other dementias |                           | 573 (492–659)                | 450·2% (419·6 to 484%)   | 111·9 (96·1–128·1)      | 1·4% (-1·4 to 4·7%)      |
|                              | Parkinson's disease                     |                           | 94 (78–110)                  | 466·8% (391·3 to 546%)   | 13·7 (12–15·5)          | 12·8% (1·4 to 26%)       |
|                              | Idiopathic epilepsy                     |                           | 758 (221–1274)               | 134% (-28 to 809·6%)     | 61·2 (18·2–101·5)       | -5·2% (-70·4 to 270·5%)  |
|                              | Multiple sclerosis                      |                           | 21 (17–26)                   | 271% (222·2 to 329%)     | 1·2 (1–1·5)             | 27·9% (21 to 34·9%)      |
|                              | Migraine                                |                           | 16696 (14309–19280)          | 151·6% (132·1 to 176·2%) | 1189·7 (1004·9–1375·8)  | 0·4% (0 to 0·8%)         |
|                              | Tension-type headache                   |                           | 130833 (112605–149916)       | 208·6% (184·1 to 235·6%) | 8524·4 (7476–9592·8)    | -0·2% (-0·3 to 0%)       |
|                              | Motor neuron disease                    |                           | 7 (5–9)                      | 254·2% (199·1 to 312·3%) | 0·5 (0·4–0·6)           | 4·4% (0·6 to 8·3%)       |

**Table S12** Burden, mortality, incidence, and prevalence of neurological conditions in North Africa and Middle East countries

| Measure | Cause                      | Location                                | All Ages                     |                          | Age-standardised          |                          |
|---------|----------------------------|-----------------------------------------|------------------------------|--------------------------|---------------------------|--------------------------|
|         |                            |                                         | Number                       | Percent change           | Rate per 100,000          | Percent change           |
|         |                            |                                         | 2019                         | From 1990 to 2019        | 2019                      | From 1990 to 2019        |
|         |                            | Mean (95% UI)                           | Mean (95% UI)                | Mean (95% UI)            | Mean (95% UI)             |                          |
| Egypt   |                            | Other neurological disorders            | 0 (0–0)                      | 0% (0 to 0%)             | 0 (0–0)                   | 0% (0 to 0%)             |
|         |                            | Headache disorders                      | 147529 (129607–166427)       | 200·9% (179·2 to 223·7%) | 9714·1 (8647·6–10789·3)   | -0·1% (-0·2 to 0%)       |
|         |                            | Meningitis                              | 21599 (17577–26759)          | -6% (-16·6 to 5·7%)      | 21·9 (18·1–26·7)          | -33·2% (-38·9 to -26·9%) |
|         |                            | Encephalitis                            | 10024 (8491–11839)           | 39·1% (31·4 to 47·1%)    | 10 (8·6–11·6)             | -10·6% (-15·2 to -5·9%)  |
|         |                            | Tetanus                                 | 213 (72–628)                 | -82·7% (-94·1 to -48·7%) | 0·3 (0·1–0·7)             | -88·5% (-95·1 to -67·3%) |
|         |                            | Brain and central nervous system cancer | 2910 (2013–4118)             | 128·8% (34·3 to 228%)    | 3·5 (2·4–5·1)             | 20·9% (-22·4 to 69·8%)   |
|         |                            | Stroke*                                 | 152702 (136448–170214)       | 138·9% (124·4 to 155·3%) | 228·4 (205–255·3)         | 9·6% (3·5 to 16·5%)      |
|         |                            | Ischaemic stroke                        | 116369 (100531–133786)       | 200·2% (176·1 to 227·7%) | 176·6 (153·4–202·3)       | 35·8% (25·7 to 46%)      |
|         |                            | Intracerebral haemorrhage               | 27106 (24428–30214)          | 43·3% (34·7 to 52·5%)    | 39·6 (35·9–44·1)          | -34·6% (-38·2 to -30·4%) |
|         |                            | Subarachnoid haemorrhage                | 9227 (7905–10872)            | 47·8% (37·6 to 59·3%)    | 12·2 (10·5–14·3)          | -31·6% (-36·3 to -26·4%) |
|         |                            | Neurological disorders†                 | 10069794 (8899171–11220191)  | 88·4% (81·1 to 96·2%)    | 10257·3 (9189·4–11341·2)  | 1·1% (-2·1 to 4·8%)      |
|         |                            | Alzheimer's disease and other dementias | 44042 (37497–50789)          | 117·7% (109·8 to 124·7%) | 107·3 (91·6–122·8)        | 2·6% (-1·1 to 5·7%)      |
|         |                            | Parkinson's disease                     | 6280 (5471–7205)             | 142·4% (121·3 to 162·3%) | 12 (10·5–13·6)            | 12·1% (3·7 to 20%)       |
|         |                            | Idiopathic epilepsy                     | 40757 (10706–70842)          | 59·9% (-54·8 to 647·6%)  | 39·3 (10·5–68·1)          | -0·4% (-72 to 360·2%)    |
|         |                            | Multiple sclerosis                      | 818 (658–986)                | 132·1% (123·1 to 142·2%) | 0·8 (0·7–1)               | 17·6% (13·8 to 21·8%)    |
|         |                            | Migraine                                | 1383829 (1182631–1579436)    | 85·2% (73·6 to 98·1%)    | 1285·1 (1107·4–1462·9)    | 3·3% (-2·1 to 9·3%)      |
|         |                            | Tension-type headache                   | 8593585 (7460381–9681319)    | 88·9% (80·8 to 98%)      | 8812·2 (7762·7–9893·9)    | 0·7% (-2·7 to 5%)        |
|         |                            | Motor neuron disease                    | 482 (400–580)                | 72·4% (60·2 to 83·7%)    | 0·5 (0·5–0·7)             | -1·8% (-5·2 to 2%)       |
|         | Iran (Islamic Republic of) |                                         | Other neurological disorders | 0 (0–0)                  | 0% (0 to 0%)              | 0 (0–0)                  |
|         |                            | Headache disorders                      | 9977414 (8813692–11125950)   | 88·4% (81·1 to 96·3%)    | 10097·3 (9024·8–11179·1)  | 1% (-2·1 to 4·7%)        |
|         |                            | Meningitis                              | 19839 (16076–24050)          | -16% (-25·5 to -2·6%)    | 25·8 (21·1–31)            | -23·5% (-29·3 to -17·2%) |
|         |                            | Encephalitis                            | 6769 (5769–7841)             | 13·4% (5·7 to 22·6%)     | 8·7 (7·4–10·2)            | 1·1% (0 to 2·3%)         |
|         |                            | Tetanus                                 | 27 (19–41)                   | -90·7% (-96·2 to -72·8%) | 0 (0–0·1)                 | -91·7% (-96·3 to -79·4%) |
|         |                            | Brain and central nervous system cancer | 5811 (2942–7046)             | 130·3% (23·4 to 189·2%)  | 7·3 (3·7–8·8)             | 29·6% (-25·3 to 57·5%)   |
|         |                            | Stroke*                                 | 102778 (90115–117821)        | 112·9% (103·9 to 123·9%) | 138·8 (121·8–159·6)       | -16·7% (-18·1 to -15·1%) |
|         |                            | Ischaemic stroke                        | 82457 (69393–97578)          | 122·7% (111·2 to 136·5%) | 112·3 (94·7–133·4)        | -14·2% (-16 to -12·5%)   |
|         |                            | Intracerebral haemorrhage               | 12798 (10809–15134)          | 68·6% (58·3 to 79·7%)    | 17·3 (14·6–20·6)          | -28% (-30·2 to -25·5%)   |
|         |                            | Subarachnoid haemorrhage                | 7523 (6200–9169)             | 106% (93·3 to 120%)      | 9·2 (7·6–11·1)            | -20·9% (-23·4 to -17·9%) |
|         |                            | Neurological disorders†                 | 9645919 (8632330–10716566)   | 62·8% (52·2 to 72·8%)    | 11293·3 (10132·6–12499·6) | 4·5% (1·6 to 6·9%)       |
|         |                            | Alzheimer's disease and other dementias | 67888 (57885–77446)          | 291·5% (266·1 to 320·5%) | 111·7 (95–127·3)          | 0·4% (-1·3 to 1·9%)      |
|         |                            | Parkinson's disease                     | 7444 (6276–8663)             | 256·7% (226·9 to 285·1%) | 11·2 (9·4–13·2)           | 13·7% (11·1 to 16·4%)    |
|         |                            | Idiopathic epilepsy                     | 44729 (30094–62083)          | 26·5% (-6·9 to 71·9%)    | 55·6 (37·2–77·3)          | 8·3% (-18·6 to 44%)      |
|         |                            | Multiple sclerosis                      | 1913 (1643–2191)             | 78·9% (60·5 to 97·2%)    | 2 (1·7–2·2)               | -5·2% (-8·4 to -2%)      |
|         |                            | Migraine                                | 1093330 (967519–1223899)     | 31·4% (21·9 to 41·7%)    | 1274·7 (1119·7–1427)      | -0·7% (-3·4 to 2·3%)     |
|         |                            | Tension-type headache                   | 8430126 (7411247–9501060)    | 67·4% (55·2 to 78·9%)    | 9837·5 (8687·5–11030·7)   | 5·3% (1·9 to 7·9%)       |
|         |                            | Motor neuron disease                    | 490 (409–596)                | 69·8% (50·1 to 87·8%)    | 0·6 (0·5–0·7)             | 4·1% (2·2 to 6·2%)       |
|         |                            | Other neurological disorders            | 0 (0–0)                      | 0% (0 to 0%)             | 0 (0–0)                   | 0% (0 to 0%)             |
|         | Headache disorders         | 9523455 (8507965–10591783)              | 62·3% (51·6 to 72·1%)        | 11112·1 (9952·4–12306·5) | 4·6% (1·6 to 6·9%)        |                          |

**Table S12** Burden, mortality, incidence, and prevalence of neurological conditions in North Africa and Middle East countries

| Measure                                 |                                         | All Ages                  |                                     | Age-standardised         |                                     |
|-----------------------------------------|-----------------------------------------|---------------------------|-------------------------------------|--------------------------|-------------------------------------|
|                                         |                                         | Number<br>2019            | Percent change<br>From 1990 to 2019 | Rate per 100,000<br>2019 | Percent change<br>From 1990 to 2019 |
| Cause                                   | Location                                | Mean (95% UI)             | Mean (95% UI)                       | Mean (95% UI)            | Mean (95% UI)                       |
| Iraq                                    | Meningitis                              | 9393 (7789–11141)         | 5·8% (-5·5 to 17·5%)                | 22·9 (19·3–26·8)         | -40·2% (-44·8 to -36·1%)            |
|                                         | Encephalitis                            | 4582 (3921–5321)          | 76·6% (66·4 to 88·5%)               | 11·1 (9·6–12·7)          | -12·1% (-15·9 to -8%)               |
|                                         | Tetanus                                 | 38 (23–65)                | -89·1% (-96·5 to -53·5%)            | 0·1 (0·1–0·2)            | -92·2% (-97·2 to -72·2%)            |
|                                         | Brain and central nervous system cancer | 2797 (2019–3628)          | 264% (85·4 to 481·7%)               | 8·5 (6·3–10·9)           | 45·7% (-22 to 125%)                 |
|                                         | Stroke*                                 | 60403 (54854–66101)       | 153·6% (141·4 to 166·3%)            | 241·6 (216·9–267)        | -11·7% (-16·4 to -6·7%)             |
|                                         | Ischaemic stroke                        | 42447 (36923–48014)       | 168·6% (150·2 to 187·7%)            | 178·1 (154–203·1)        | -5% (-11·7 to 2·3%)                 |
|                                         | Intracerebral haemorrhage               | 14714 (13481–16029)       | 132·8% (122·2 to 146·8%)            | 52·7 (48·2–57·9)         | -22·7% (-26·6 to -18·3%)            |
|                                         | Subarachnoid haemorrhage                | 3242 (2740–3831)          | 90·7% (72·6 to 109·4%)              | 10·8 (9·1–12·8)          | -40·3% (-45·7 to -34·7%)            |
|                                         | Neurological disorders†                 | 4137753 (3642822–4636981) | 159·3% (151·1 to 167·8%)            | 9902·6 (8818·8–10985·9)  | 0% (-0·5 to 0·5%)                   |
|                                         | Alzheimer's disease and other dementias | 17479 (14946–20004)       | 165·3% (156·4 to 175·8%)            | 108·8 (93·1–124·3)       | 2·2% (-0·6 to 5·3%)                 |
|                                         | Parkinson's disease                     | 1951 (1712–2207)          | 183·6% (163·9 to 208·4%)            | 10 (8·8–11·3)            | 1·6% (-5·3 to 9·9%)                 |
|                                         | Idiopathic epilepsy                     | 20248 (4904–36053)        | 116·9% (-40·6 to 800·7%)            | 45·3 (11–79·1)           | 1·3% (-72·3 to 319·5%)              |
|                                         | Multiple sclerosis                      | 607 (481–749)             | 238·3% (218·6 to 256·6%)            | 1·3 (1·1–1·6)            | 13·8% (9·2 to 18·5%)                |
|                                         | Migraine                                | 569281 (479195–662177)    | 140% (127·9 to 151·9%)              | 1229·4 (1042·5–1418·4)   | -0·1% (-0·2 to -0·1%)               |
|                                         | Tension-type headache                   | 3527971 (3048007–4011221) | 162·9% (153·4 to 172·6%)            | 8507·1 (7448·5–9584·3)   | 0% (0 to 0%)                        |
|                                         | Motor neuron disease                    | 215 (178–260)             | 132·4% (110·9 to 154%)              | 0·6 (0·5–0·7)            | 4·1% (0·7 to 7·7%)                  |
|                                         | Other neurological disorders            | 0 (0–0)                   | 0% (0 to 0%)                        | 0 (0–0)                  | 0% (0 to 0%)                        |
|                                         | Headache disorders                      | 4097252 (3604695–4592180) | 159·5% (151·2 to 168·2%)            | 9736·6 (8654·2–10821·6)  | 0% (0 to 0%)                        |
|                                         | Jordan                                  | Meningitis                | 3034 (2459–3737)                    | 128·8% (107·8 to 154·7%) | 27·4 (22·5–33·1)                    |
| Encephalitis                            |                                         | 939 (785–1120)            | 145·3% (130·3 to 162·4%)            | 8·2 (7–9·6)              | -5·4% (-9·3 to -0·7%)               |
| Tetanus                                 |                                         | 3 (2–4)                   | -58·9% (-81·7 to 18·5%)             | 0 (0–0)                  | -80·1% (-90·8 to -53·3%)            |
| Brain and central nervous system cancer |                                         | 409 (295–508)             | 377·4% (199·9 to 546·7%)            | 4·4 (3·1–5·4)            | 26% (-21·9 to 71·5%)                |
| Stroke*                                 |                                         | 15457 (13809–17262)       | 238% (216·8 to 261·6%)              | 225·9 (200·5–253·4)      | -26·2% (-30·9 to -20·8%)            |
| Ischaemic stroke                        |                                         | 12026 (10423–13812)       | 245·7% (218·2 to 275·8%)            | 181·4 (156·6–208·7)      | -24·9% (-30·9 to -18·1%)            |
| Intracerebral haemorrhage               |                                         | 2162 (1916–2472)          | 166·1% (147·1 to 186%)              | 30·2 (26·9–34)           | -39·6% (-43·5 to -35%)              |
| Subarachnoid haemorrhage                |                                         | 1270 (1034–1570)          | 350·1% (300·9 to 401·4%)            | 14·3 (11·7–17·6)         | -2·3% (-12·5 to 7·5%)               |
| Neurological disorders†                 |                                         | 1148696 (1012559–1286134) | 230% (218·2 to 242·7%)              | 9888·5 (8805·2–10979·7)  | 0% (-0·4 to 0·5%)                   |
| Alzheimer's disease and other dementias |                                         | 4712 (4020–5451)          | 425·7% (403·9 to 446·7%)            | 107·9 (91·9–123·3)       | 1·8% (-1·3 to 4·8%)                 |
| Parkinson's disease                     |                                         | 563 (491–642)             | 408% (353·5 to 457·6%)              | 10·3 (9·1–11·6)          | -3% (-12·7 to 6%)                   |
| Idiopathic epilepsy                     |                                         | 5674 (1526–9673)          | 183·9% (-25·7 to 975·2%)            | 46·5 (12·5–79)           | 4·7% (-72·3 to 291·9%)              |
| Multiple sclerosis                      |                                         | 202 (163–241)             | 245·5% (204·9 to 283·8%)            | 1·6 (1·3–1·9)            | -2·4% (-12·7 to 7·8%)               |
| Migraine                                |                                         | 155009 (130146–180094)    | 199·1% (186·6 to 212·3%)            | 1213·3 (1027·6–1402·1)   | -0·6% (-0·8 to -0·5%)               |
| Tension-type headache                   |                                         | 982482 (849563–1113702)   | 235·1% (221 to 250·2%)              | 8508·4 (7455–9588·3)     | 0·1% (0 to 0·2%)                    |
| Motor neuron disease                    |                                         | 55 (46–66)                | 221% (185 to 257·9%)                | 0·5 (0·5–0·6)            | 2·4% (-1·9 to 6·6%)                 |
| Other neurological disorders            |                                         | 0 (0–0)                   | 0% (0 to 0%)                        | 0 (0–0)                  | 0% (0 to 0%)                        |
| Headache disorders                      |                                         | 1137490 (1001771–1274002) | 229·7% (217·7 to 242·6%)            | 9721·7 (8637·2–10804·7)  | 0% (-0·1 to 0·1%)                   |
| Kuwait                                  |                                         | Meningitis                | 669 (534–826)                       | 64·1% (48·1 to 82·4%)    | 19·2 (15·6–23·2)                    |
|                                         | Encephalitis                            | 307 (259–359)             | 114·9% (98·8 to 132·8%)             | 8·3 (7·1–9·8)            | 0·6% (-4·3 to 5%)                   |
|                                         | Tetanus                                 | 0 (0–0)                   | 92% (-77·1 to 609·3%)               | 0 (0–0)                  | -60·9% (-93·8 to -5·7%)             |
|                                         | Brain and central nervous system cancer | 144 (101–181)             | 300·1% (144·2 to 423·9%)            | 4 (2·8–5)                | 44·3% (-12·5 to 86·6%)              |



**Table S12** Burden, mortality, incidence, and prevalence of neurological conditions in North Africa and Middle East countries

| Measure                                 | Cause                                   | Location               | All Ages                 |                          | Age-standardised         |                          |                      |
|-----------------------------------------|-----------------------------------------|------------------------|--------------------------|--------------------------|--------------------------|--------------------------|----------------------|
|                                         |                                         |                        | Number                   | Percent change           | Rate per 100,000         | Percent change           |                      |
|                                         |                                         |                        | 2019                     | From 1990 to 2019        | 2019                     | From 1990 to 2019        |                      |
|                                         |                                         | Mean (95% UI)          | Mean (95% UI)            | Mean (95% UI)            | Mean (95% UI)            |                          |                      |
| Lebanon                                 | Stroke*                                 |                        | 4005 (3598–4495)         | 270.9% (249.2 to 294.7%) | 125.8 (113.7–140.4)      | -2.7% (-8.2 to 3.3%)     |                      |
|                                         | Ischaemic stroke                        |                        | 2745 (2374–3199)         | 271.6% (243 to 304.6%)   | 91.5 (79.6–105.3)        | -4% (-10.7 to 4.2%)      |                      |
|                                         | Intracerebral haemorrhage               |                        | 704 (626–803)            | 256.5% (228.2 to 284.7%) | 21.4 (19.2–24.2)         | -0.5% (-7.4 to 7%)       |                      |
|                                         | Subarachnoid haemorrhage                |                        | 556 (438–711)            | 287.1% (244.6 to 338.5%) | 12.9 (10.5–16.2)         | 3.1% (-6.4 to 15.2%)     |                      |
|                                         | Neurological disorders†                 |                        | 451938 (399757–508423)   | 162.4% (148.6 to 176.8%) | 9888.6 (8803.3–10919.9)  | -0.1% (-2.6 to 2.5%)     |                      |
|                                         | Alzheimer's disease and other dementias |                        | 2054 (1797–2316)         | 391.7% (373.8 to 411.3%) | 111.2 (95.4–127.1)       | 0.7% (-2.3 to 4%)        |                      |
|                                         | Parkinson's disease                     |                        | 190 (165–222)            | 288.1% (244.9 to 338.3%) | 8.4 (7.4–9.6)            | -11.5% (-23.7 to 2.8%)   |                      |
|                                         | Idiopathic epilepsy                     |                        | 2250 (614–3660)          | 115.4% (-38.4 to 703.8%) | 56 (15.2–90.4)           | -0.9% (-72 to 282.6%)    |                      |
|                                         | Multiple sclerosis                      |                        | 101 (82–120)             | 302.1% (270.4 to 337.5%) | 1.8 (1.5–2.1)            | 49.9% (41.5 to 58.8%)    |                      |
|                                         | Migraine                                |                        | 56016 (47909–65273)      | 140.8% (123.9 to 159.7%) | 1223.6 (1039.8–1415.4)   | 2.8% (-0.5 to 6.6%)      |                      |
|                                         | Tension-type headache                   |                        | 391309 (340667–446614)   | 165.4% (150 to 182.2%)   | 8487.2 (7489.2–9540.2)   | -0.6% (-3.3 to 2.4%)     |                      |
|                                         | Motor neuron disease                    |                        | 19 (15–24)               | 142.6% (113.4 to 171.4%) | 0.5 (0.4–0.6)            | -12% (-16.5 to -7.4%)    |                      |
|                                         | Other neurological disorders            |                        | 0 (0–0)                  | 0% (0 to 0%)             | 0 (0–0)                  | 0% (0 to 0%)             |                      |
|                                         | Headache disorders                      |                        | 447324 (393997–503177)   | 162% (148.3 to 176%)     | 9710.8 (8639.4–10763.2)  | -0.1% (-2.6 to 2.5%)     |                      |
|                                         | Meningitis                              |                        | 1024 (846–1215)          | -2% (-12.5 to 9.9%)      | 20 (16.5–23.7)           | -27.8% (-33 to -22.6%)   |                      |
|                                         | Encephalitis                            |                        | 635 (556–721)            | 31.4% (24.7 to 39.7%)    | 12.4 (10.9–14.1)         | -12.5% (-15.7 to -8.5%)  |                      |
|                                         | Tetanus                                 |                        | 37 (8–145)               | -51% (-90.3 to 59.8%)    | 0.7 (0.2–2.9)            | -78.6% (-95.3 to -30.4%) |                      |
|                                         | Brain and central nervous system cancer |                        | 350 (252–447)            | 195% (101.3 to 302.7%)   | 6.7 (4.8–8.6)            | 56.4% (6.3 to 111.2%)    |                      |
|                                         | Libya                                   | Stroke*                |                          | 7800 (7030–8706)         | 112% (99.5 to 126.2%)    | 150.5 (135.7–167.8)      | -5.3% (-9.9 to 0.3%) |
|                                         |                                         | Ischaemic stroke       |                          | 6161 (5384–7048)         | 143.8% (126.1 to 164.3%) | 119 (104.1–135.6)        | 7.9% (1.1 to 15.5%)  |
| Intracerebral haemorrhage               |                                         |                        | 979 (866–1103)           | 24.9% (16.6 to 33.8%)    | 19 (16.9–21.4)           | -43.7% (-47.2 to -40.1%) |                      |
| Subarachnoid haemorrhage                |                                         |                        | 660 (539–834)            | 79.6% (58.5 to 103%)     | 12.5 (10.2–15.7)         | -15.3% (-24.8 to -4.5%)  |                      |
| Neurological disorders†                 |                                         |                        | 514250 (459288–572600)   | 68.3% (61.8 to 74.7%)    | 9912.9 (8824.5–10995.6)  | 0.2% (-0.4 to 0.7%)      |                      |
| Alzheimer's disease and other dementias |                                         |                        | 5623 (4787–6485)         | 207.7% (191.4 to 222.2%) | 110.6 (95.2–126.5)       | 1.6% (-1.8 to 4.7%)      |                      |
| Parkinson's disease                     |                                         |                        | 536 (481–603)            | 189.9% (158.6 to 222.5%) | 10.2 (9.2–11.4)          | 8.8% (-1 to 19.2%)       |                      |
| Idiopathic epilepsy                     |                                         |                        | 2594 (728–4401)          | 50% (-61.3 to 581.9%)    | 50.9 (14.3–85.5)         | 7.2% (-72.2 to 387.8%)   |                      |
| Multiple sclerosis                      |                                         |                        | 102 (84–121)             | 135.2% (114.3 to 158%)   | 1.8 (1.5–2.2)            | 26.5% (20.2 to 34.6%)    |                      |
| Migraine                                |                                         |                        | 63410 (53956–72932)      | 51.9% (44.8 to 59.7%)    | 1235.1 (1046.9–1423.5)   | -0.4% (-0.5 to -0.2%)    |                      |
| Tension-type headache                   |                                         |                        | 441957 (387091–499441)   | 69.9% (62.6 to 77%)      | 8503.8 (7444.7–9581.2)   | 0.2% (0.1 to 0.3%)       |                      |
| Motor neuron disease                    |                                         |                        | 28 (23–33)               | 63.7% (51.1 to 75.5%)    | 0.5 (0.4–0.6)            | -0.6% (-3.8 to 2.8%)     |                      |
| Other neurological disorders            |                                         |                        | 0 (0–0)                  | 0% (0 to 0%)             | 0 (0–0)                  | 0% (0 to 0%)             |                      |
| Headache disorders                      |                                         |                        | 505367 (450608–563886)   | 67.4% (61.1 to 73.5%)    | 9738.8 (8650.3–10829.1)  | 0.1% (0 to 0.2%)         |                      |
| Meningitis                              |                                         |                        | 965 (783–1160)           | -27.8% (-37.6 to -15.7%) | 17.7 (14.6–21.4)         | -34.7% (-40.1 to -28.9%) |                      |
| Encephalitis                            |                                         |                        | 360 (306–417)            | 13.8% (3.2 to 27%)       | 6.3 (5.4–7.4)            | -1.2% (-5.3 to 2.9%)     |                      |
| Tetanus                                 |                                         |                        | 2 (1–5)                  | -54.9% (-82.9 to 11.7%)  | 0 (0–0.1)                | -67.1% (-88.8 to -23.8%) |                      |
| Brain and central nervous system cancer |                                         |                        | 319 (237–423)            | 130.5% (60.2 to 239.2%)  | 5.2 (3.9–6.8)            | 15.6% (-17.6 to 64.1%)   |                      |
| Stroke*                                 |                                         |                        | 9358 (8475–10432)        | 180.8% (162.4 to 200.3%) | 170.9 (153.6–190.3)      | 7.9% (2.1 to 14.6%)      |                      |
| Ischaemic stroke                        |                                         |                        | 7177 (6299–8209)         | 230.5% (201.8 to 261.7%) | 133.9 (117–152.9)        | 25.3% (16.7 to 34.8%)    |                      |
| Intracerebral haemorrhage               |                                         | 1434 (1285–1592)       | 74.6% (64.1 to 86%)      | 25.3 (22.6–28.3)         | -31.6% (-35.3 to -27.9%) |                          |                      |
| Subarachnoid haemorrhage                |                                         | 747 (617–917)          | 119.8% (99.5 to 144.3%)  | 11.7 (9.8–14)            | -19.8% (-26.1 to -12.7%) |                          |                      |
| Neurological disorders†                 |                                         | 694187 (614912–774991) | 77.3% (66.9 to 88.3%)    | 9902.4 (8808.5–10993.8)  | 0% (-0.4 to 0.5%)        |                          |                      |
| Alzheimer's disease and other dementias |                                         | 4408 (3768–5005)       | 168% (159.4 to 176.1%)   | 107.4 (90.9–122.9)       | -1.9% (-5 to 0.9%)       |                          |                      |
| Parkinson's disease                     |                                         | 515 (457–572)          | 208.6% (188.1 to 233.7%) | 11.3 (9.9–12.5)          | 11.7% (3.9 to 20.6%)     |                          |                      |

**Table S12** Burden, mortality, incidence, and prevalence of neurological conditions in North Africa and Middle East countries

| Measure                      | Cause                                   | Location               | All Ages                  |                          | Age-standardised        |                          |
|------------------------------|-----------------------------------------|------------------------|---------------------------|--------------------------|-------------------------|--------------------------|
|                              |                                         |                        | Number                    | Percent change           | Rate per 100,000        | Percent change           |
|                              |                                         |                        | 2019                      | From 1990 to 2019        | 2019                    | From 1990 to 2019        |
|                              |                                         | Mean (95% UI)          | Mean (95% UI)             | Mean (95% UI)            | Mean (95% UI)           |                          |
| Morocco                      | Idiopathic epilepsy                     |                        | 2904 (941–4821)           | 19·4% (-63·1 to 350·8%)  | 45·6 (14·8–75)          | -8·1% (-69·9 to 242·5%)  |
|                              | Multiple sclerosis                      |                        | 119 (101–140)             | 169·2% (143·6 to 194·3%) | 1·5 (1·3–1·7)           | 25·9% (19·4 to 30·9%)    |
|                              | Migraine                                |                        | 87010 (74572–100028)      | 51·3% (37·8 to 65·4%)    | 1227·8 (1041·4–1416·6)  | 1·1% (0·8 to 1·4%)       |
|                              | Tension-type headache                   |                        | 599202 (520188–678679)    | 81·7% (69·1 to 94·3%)    | 8508·4 (7450·6–9585·8)  | -0·1% (-0·2 to 0·1%)     |
|                              | Motor neuron disease                    |                        | 29 (24–35)                | 65·1% (41·3 to 88%)      | 0·5 (0·4–0·6)           | 1·4% (-2·7 to 5·5%)      |
|                              | Other neurological disorders            |                        | 0 (0–0)                   | 0% (0 to 0%)             | 0 (0–0)                 | 0% (0 to 0%)             |
|                              | Headache disorders                      |                        | 686212 (606467–767209)    | 77·2% (66·6 to 88·4%)    | 9736·2 (8655·1–10820·8) | 0·1% (-0·1 to 0·2%)      |
|                              | Meningitis                              |                        | 7009 (5794–8281)          | -41·1% (-46·9 to -35·1%) | 22·1 (18·5–26·2)        | -45·9% (-49·8 to -41·6%) |
|                              | Encephalitis                            |                        | 2914 (2471–3374)          | 18·3% (11·8 to 26%)      | 8·6 (7·3–10)            | -2·8% (-6·8 to 1·4%)     |
|                              | Tetanus                                 |                        | 169 (44–567)              | -93·2% (-98·3 to -75·6%) | 0·6 (0·1–1·9)           | -92·1% (-97·9 to -74%)   |
|                              | Brain and central nervous system cancer |                        | 639 (446–862)             | 101·7% (22·8 to 189·8%)  | 1·8 (1·3–2·4)           | 19·5% (-22·3 to 67·3%)   |
|                              | Stroke*                                 |                        | 63692 (57107–70794)       | 106·6% (93·9 to 120·9%)  | 199·8 (179·8–222)       | -4·4% (-9·8 to 1·5%)     |
|                              | Ischaemic stroke                        |                        | 48382 (42016–55500)       | 152·2% (130·5 to 175·1%) | 152·9 (132·9–174·8)     | 14·9% (5·8 to 23·9%)     |
|                              | Intracerebral haemorrhage               |                        | 10826 (9693–12112)        | 27·4% (20·2 to 35·1%)    | 33·7 (30·3–37·7)        | -40% (-43·3 to -36·3%)   |
|                              | Subarachnoid haemorrhage                |                        | 4485 (3794–5253)          | 42·4% (32·8 to 53·1%)    | 13·3 (11·3–15·4)        | -32·8% (-37·3 to -28·1%) |
|                              | Neurological disorders†                 |                        | 3608793 (3200563–4010183) | 50% (44·6 to 55·5%)      | 9904·2 (8826·3–10974·4) | 0% (-0·5 to 0·5%)        |
|                              | Alzheimer's disease and other dementias |                        | 25591 (21785–29492)       | 140·2% (131 to 149·4%)   | 109·1 (92·7–124·8)      | -1% (-4·1 to 2·3%)       |
| Parkinson's disease          |                                         | 2733 (2425–3050)       | 176·5% (152·1 to 204·6%)  | 9·8 (8·8–10·9)           | 21% (10·5 to 32·2%)     |                          |
| Palestine                    | Idiopathic epilepsy                     |                        | 15481 (4080–27531)        | 39·5% (-66·3 to 514·5%)  | 44·2 (11·7–78·4)        | 13·7% (-72·8 to 390·2%)  |
|                              | Multiple sclerosis                      |                        | 565 (471–673)             | 87·7% (75·1 to 101·5%)   | 1·5 (1·2–1·8)           | 20·3% (14 to 26·9%)      |
|                              | Migraine                                |                        | 456426 (389533–524531)    | 32·8% (26·8 to 39%)      | 1236·4 (1048·9–1424·6)  | -0·4% (-0·4 to -0·3%)    |
|                              | Tension-type headache                   |                        | 3107802 (2711391–3502989) | 52·4% (46·3 to 59%)      | 8502·5 (7441·7–9579·2)  | 0% (0 to 0%)             |
|                              | Motor neuron disease                    |                        | 195 (161–239)             | 49·4% (34·4 to 64·1%)    | 0·6 (0·5–0·7)           | -2·1% (-5·8 to 1·6%)     |
|                              | Other neurological disorders            |                        | 0 (0–0)                   | 0% (0 to 0%)             | 0 (0–0)                 | 0% (0 to 0%)             |
|                              | Headache disorders                      |                        | 3564228 (3157937–3966864) | 49·6% (44·3 to 55·2%)    | 9739 (8652·6–10825·3)   | -0·1% (-0·1 to 0%)       |
|                              | Meningitis                              |                        | 912 (725–1116)            | -1% (-12·7 to 12·1%)     | 18·6 (15·5–22·2)        | -44·1% (-48·5 to -39%)   |
|                              | Encephalitis                            |                        | 435 (357–523)             | 100·1% (87·3 to 113·4%)  | 8·4 (7·1–9·8)           | -0·8% (-4·8 to 3·9%)     |
|                              | Tetanus                                 |                        | 2 (1–2)                   | -87% (-96·4 to -40%)     | 0 (0–0·1)               | -89·7% (-96·9 to -64·2%) |
|                              | Brain and central nervous system cancer |                        | 324 (249–395)             | 175·7% (74 to 272·6%)    | 9·4 (7·1–11·2)          | 9·9% (-27·2 to 49%)      |
|                              | Stroke*                                 |                        | 4745 (4261–5288)          | 143·1% (127·3 to 157·8%) | 189·7 (170·1–212·2)     | -7·6% (-13·7 to -1·7%)   |
|                              | Ischaemic stroke                        |                        | 3632 (3175–4171)          | 164% (142·7 to 185·3%)   | 149·6 (130–172·4)       | 2·5% (-5·9 to 11·2%)     |
|                              | Intracerebral haemorrhage               |                        | 727 (650–832)             | 66·5% (55·8 to 78·5%)    | 28·3 (25·8–31·3)        | -38·8% (-42·9 to -34·8%) |
|                              | Subarachnoid haemorrhage                |                        | 386 (316–475)             | 176·1% (152·5 to 205·6%) | 11·8 (9·8–14·6)         | -9·4% (-16·3 to -0·8%)   |
|                              | Neurological disorders†                 |                        | 478406 (419814–539351)    | 161·1% (155·1 to 167·9%) | 9904·4 (8818·6–11008·6) | -0·1% (-0·6 to 0·4%)     |
|                              | Alzheimer's disease and other dementias |                        | 1766 (1512–2023)          | 136·8% (128·6 to 144·9%) | 109·3 (93·5–124·8)      | 0·6% (-2·4 to 3·8%)      |
| Parkinson's disease          |                                         | 217 (193–244)          | 160·2% (139·7 to 183·5%)  | 11·3 (10·1–12·7)         | 3·8% (-3·7 to 12·4%)    |                          |
| Idiopathic epilepsy          |                                         | 2473 (625–4398)        | 126·4% (-42·8 to 926·7%)  | 45·6 (12–79·7)           | 5·7% (-72·6 to 387·6%)  |                          |
| Multiple sclerosis           |                                         | 74 (60–90)             | 235·8% (219·6 to 254·9%)  | 1·5 (1·2–1·7)            | 16·3% (12·3 to 21·4%)   |                          |
| Migraine                     |                                         | 68357 (56868–80265)    | 148·6% (140·3 to 156·8%)  | 1232·3 (1045–1421)       | -0·3% (-0·5 to -0·2%)   |                          |
| Tension-type headache        |                                         | 405495 (349922–462326) | 163·7% (156·7 to 171·4%)  | 8503·8 (7444·3–9580·2)   | -0·1% (-0·2 to 0%)      |                          |
| Motor neuron disease         |                                         | 24 (20–29)             | 119·4% (98·4 to 141·2%)   | 0·6 (0·5–0·7)            | 0·5% (-2·8 to 4·1%)     |                          |
| Other neurological disorders |                                         | 0 (0–0)                | 0% (0 to 0%)              | 0 (0–0)                  | 0% (0 to 0%)            |                          |



**Table S12** Burden, mortality, incidence, and prevalence of neurological conditions in North Africa and Middle East countries

| Measure                      | Cause                                   | Location      | All Ages               |                            | Age-standardised        |                          |
|------------------------------|-----------------------------------------|---------------|------------------------|----------------------------|-------------------------|--------------------------|
|                              |                                         |               | Number                 | Percent change             | Rate per 100,000        | Percent change           |
|                              |                                         |               | 2019                   | From 1990 to 2019          | 2019                    | From 1990 to 2019        |
|                              |                                         | Mean (95% UI) | Mean (95% UI)          | Mean (95% UI)              | Mean (95% UI)           |                          |
| Oman                         | Headache disorders                      |               | 473852 (414848–534653) | 161.4% (155.4 to 168%)     | 9736.1 (8651.9–10822)   | -0.1% (-0.2 to 0%)       |
|                              | Meningitis                              |               | 274 (216–341)          | -3.7% (-13.9 to 9.4%)      | 8.6 (7.1–10.4)          | -40.6% (-45.2 to -36.4%) |
|                              | Encephalitis                            |               | 568 (495–645)          | 50% (39.8 to 62%)          | 15.8 (14.1–17.6)        | -21.3% (-24.5 to -17.7%) |
|                              | Tetanus                                 |               | 1 (1–2)                | -75.2% (-91.2 to -7.3%)    | 0 (0–0.1)               | -92.1% (-98.5 to -53.2%) |
|                              | Brain and central nervous system cancer |               | 123 (72–161)           | 343.4% (121 to 582.6%)     | 3.7 (2.3–4.7)           | 69.9% (-13.9 to 153.1%)  |
|                              | Stroke*                                 |               | 3701 (3308–4161)       | 125.4% (112.1 to 138.6%)   | 196.2 (174.8–222.1)     | -10.3% (-15.9 to -4.6%)  |
|                              | Ischaemic stroke                        |               | 2666 (2292–3116)       | 156.8% (136.8 to 175.9%)   | 148.9 (128.2–173.3)     | 3.3% (-4.6 to 11.8%)     |
|                              | Intracerebral haemorrhage               |               | 669 (590–756)          | 50.9% (40.6 to 63.9%)      | 35.3 (31.4–39.6)        | -39.3% (-43.1 to -35.4%) |
|                              | Subarachnoid haemorrhage                |               | 366 (301–451)          | 127.6% (104 to 153.5%)     | 12 (10.1–14.2)          | -26.9% (-32.7 to -21.1%) |
|                              | Neurological disorders†                 |               | 462926 (402131–528279) | 157.7% (141 to 173.5%)     | 9864.6 (8795.8–10966.6) | 0% (-0.5 to 0.5%)        |
|                              | Alzheimer's disease and other dementias |               | 1020 (873–1171)        | 144.6% (135.1 to 154%)     | 110.1 (93.9–125.2)      | -0.6% (-3.5 to 2.4%)     |
|                              | Parkinson's disease                     |               | 213 (185–245)          | 222.3% (196.6 to 253.5%)   | 17.6 (15.6–20.1)        | 33.3% (23.2 to 45.2%)    |
|                              | Idiopathic epilepsy                     |               | 2223 (686–3757)        | 134.3% (-32.3 to 837.3%)   | 50.3 (15.1–85.3)        | 19.4% (-65.9 to 372.9%)  |
|                              | Multiple sclerosis                      |               | 82 (67–100)            | 340.4% (304.2 to 374.4%)   | 1.2 (1–1.4)             | 28% (21.8 to 34.8%)      |
|                              | Migraine                                |               | 55853 (47175–65125)    | 119.2% (97.7 to 141.3%)    | 1153.5 (973.2–1340.3)   | -1% (-1.4 to -0.7%)      |
|                              | Tension-type headache                   |               | 403518 (342668–467602) | 164.3% (145.6 to 183.1%)   | 8531.4 (7483.3–9610.9)  | 0% (-0.2 to 0.1%)        |
|                              | Motor neuron disease                    |               | 18 (14–22)             | 128% (101.1 to 156.7%)     | 0.5 (0.4–0.6)           | 0.6% (-3 to 4.1%)        |
| Other neurological disorders |                                         | 0 (0–0)       | 0% (0 to 0%)           | 0 (0–0)                    | 0% (0 to 0%)            |                          |
| Qatar                        | Headache disorders                      |               | 459371 (397916–524267) | 157.8% (141.4 to 173.4%)   | 9684.9 (8625.4–10764)   | -0.2% (-0.3 to 0%)       |
|                              | Meningitis                              |               | 1264 (987–1594)        | 365.1% (306.3 to 439.9%)   | 56.3 (46.3–68.2)        | -17.5% (-22.9 to -12.5%) |
|                              | Encephalitis                            |               | 170 (141–199)          | 394.9% (348.9 to 438.7%)   | 8.3 (7–9.6)             | -1.8% (-5.9 to 2.7%)     |
|                              | Tetanus                                 |               | 1 (0–1)                | 246.7% (18.5 to 553.5%)    | 0 (0–0)                 | -47.2% (-84.6 to 40.9%)  |
|                              | Brain and central nervous system cancer |               | 97 (63–161)            | 982.3% (534.6 to 1563%)    | 5.3 (3.8–7.6)           | 36.2% (-15.7 to 100%)    |
|                              | Stroke*                                 |               | 1889 (1659–2171)       | 487.3% (447.3 to 527.8%)   | 127.1 (114.7–141.6)     | -26.1% (-30.3 to -21.7%) |
|                              | Ischaemic stroke                        |               | 1165 (949–1435)        | 515.8% (455.6 to 575.7%)   | 87.5 (75.7–101.9)       | -24.8% (-30.6 to -18.4%) |
|                              | Intracerebral haemorrhage               |               | 385 (328–454)          | 380.1% (337.6 to 438.3%)   | 24.5 (21.9–27.6)        | -34% (-38.3 to -29.3%)   |
|                              | Subarachnoid haemorrhage                |               | 339 (274–412)          | 548.7% (485 to 610.3%)     | 15.1 (12.9–17.5)        | -18.7% (-25.3 to -13%)   |
|                              | Neurological disorders†                 |               | 297563 (254878–343236) | 581.2% (557.6 to 604.4%)   | 9777.4 (8710.9–10885.3) | -0.5% (-1.1 to 0%)       |
|                              | Alzheimer's disease and other dementias |               | 434 (362–505)          | 701.7% (645.5 to 764%)     | 109 (92.9–124.7)        | 2.5% (-1 to 6.3%)        |
|                              | Parkinson's disease                     |               | 110 (92–132)           | 796.5% (707.7 to 879.6%)   | 18.4 (16.3–20.7)        | 26.5% (16.2 to 38.3%)    |
|                              | Idiopathic epilepsy                     |               | 1413 (442–2362)        | 465.9% (62.6 to 2033.6%)   | 56.4 (16.9–93.7)        | 2% (-69.9 to 273.5%)     |
|                              | Multiple sclerosis                      |               | 85 (73–99)             | 1046.5% (915.9 to 1227.2%) | 1.8 (1.6–2)             | 44.3% (27.3 to 63.6%)    |
|                              | Migraine                                |               | 32281 (27198–37927)    | 494.1% (456 to 527.1%)     | 1106.2 (930.6–1292.4)   | -2.3% (-3 to -1.6%)      |
|                              | Tension-type headache                   |               | 263229 (222394–306753) | 594.1% (567.9 to 620.2%)   | 8485.2 (7444.1–9569.2)  | -0.4% (-0.7 to -0.1%)    |
|                              | Motor neuron disease                    |               | 11 (8–14)              | 541% (467.6 to 611.6%)     | 0.5 (0.4–0.6)           | 1.3% (-2.6 to 5.5%)      |
| Other neurological disorders |                                         | 0 (0–0)       | 0% (0 to 0%)           | 0 (0–0)                    | 0% (0 to 0%)            |                          |
| Saudi Arabia                 | Headache disorders                      |               | 295510 (252820–340824) | 581.5% (557.2 to 604.5%)   | 9591.5 (8532.6–10666.3) | -0.6% (-0.9 to -0.3%)    |
|                              | Meningitis                              |               | 4378 (3416–5388)       | 12.6% (-0.7 to 29.9%)      | 17 (13.6–20.6)          | -33.5% (-39.9 to -26.1%) |
|                              | Encephalitis                            |               | 2662 (2268–3079)       | 57% (40.6 to 73.5%)        | 9.2 (7.9–10.7)          | -11% (-15.2 to -6.3%)    |
|                              | Tetanus                                 |               | 24 (8–42)              | -90.3% (-98.7 to -46.9%)   | 0.1 (0–0.1)             | -95% (-99.1 to -69.9%)   |
|                              | Brain and central nervous system cancer |               | 1296 (944–1962)        | 625.3% (283.3 to 1290.8%)  | 4.1 (3.1–6.2)           | 136% (25.5 to 341.7%)    |
|                              | Stroke*                                 |               | 41061 (37416–45161)    | 254.9% (234 to 278.8%)     | 193.9 (176.5–213.7)     | 11.9% (6.7 to 18%)       |
|                              | Ischaemic stroke                        |               | 28087 (24748–32005)    | 280.6% (248.3 to 315.6%)   | 140.4 (123.8–159.3)     | 20.7% (12.7 to 29.8%)    |
|                              | Intracerebral haemorrhage               |               | 9675 (8851–10619)      | 204% (184.5 to 224.3%)     | 42.8 (38.9–47.5)        | -6% (-11.1 to -0.8%)     |

**Table S12** Burden, mortality, incidence, and prevalence of neurological conditions in North Africa and Middle East countries

| Measure              | Cause                        | Location                                | All Ages                  |                          | Age-standardised        |                          |
|----------------------|------------------------------|-----------------------------------------|---------------------------|--------------------------|-------------------------|--------------------------|
|                      |                              |                                         | Number                    | Percent change           | Rate per 100,000        | Percent change           |
|                      |                              |                                         | 2019                      | From 1990 to 2019        | 2019                    | From 1990 to 2019        |
|                      |                              | Mean (95% UI)                           | Mean (95% UI)             | Mean (95% UI)            | Mean (95% UI)           |                          |
| Syrian Arab Republic |                              | Subarachnoid haemorrhage                | 3299 (2654–4136)          | 227.3% (196.2 to 266.1%) | 10.7 (8.8–13.3)         | -5.9% (-13.1 to 4.2%)    |
|                      |                              | Neurological disorders†                 | 3567976 (3139311–4012111) | 144.8% (128.1 to 162.2%) | 9582.1 (8516.5–10684.8) | -0.8% (-3.4 to 2%)       |
|                      |                              | Alzheimer's disease and other dementias | 10230 (8861–11651)        | 136.6% (124.3 to 151%)   | 108.1 (92–123.6)        | -1.3% (-4.3 to 1.9%)     |
|                      |                              | Parkinson's disease                     | 1952 (1713–2220)          | 224.7% (195.2 to 256.1%) | 16 (14.4–18.2)          | 26.7% (16.2 to 38.2%)    |
|                      |                              | Idiopathic epilepsy                     | 23922 (6464–39404)        | 153.9% (-31.8 to 928.7%) | 71.1 (20.2–117.3)       | 33% (-62.7 to 418.5%)    |
|                      |                              | Multiple sclerosis                      | 487 (387–593)             | 273.2% (242.2 to 306%)   | 1 (0.8–1.2)             | 22.9% (17.5 to 28.3%)    |
|                      |                              | Migraine                                | 449325 (383954–519673)    | 110.6% (89.9 to 133.2%)  | 1179.2 (1004.5–1362.2)  | -0.6% (-3.9 to 2.4%)     |
|                      |                              | Tension-type headache                   | 3081911 (2653414–3512212) | 150.6% (131.2 to 170.4%) | 8206.1 (7168.6–9215.6)  | -1% (-4 to 2%)           |
|                      |                              | Motor neuron disease                    | 149 (119–186)             | 127.1% (94.5 to 161.5%)  | 0.5 (0.4–0.6)           | 3.1% (-1.3 to 7.2%)      |
|                      |                              | Other neurological disorders            | 0 (0–0)                   | 0% (0 to 0%)             | 0 (0–0)                 | 0% (0 to 0%)             |
|                      |                              | Headache disorders                      | 3531235 (3088625–3972683) | 144.7% (127.8 to 162.2%) | 9385.4 (8318–10477.2)   | -1% (-3.5 to 1.8%)       |
|                      |                              | Meningitis                              | 3021 (2512–3583)          | -52.1% (-57.6 to -45.4%) | 23.7 (19.9–27.8)        | -37.1% (-41.5 to -32.2%) |
|                      |                              | Encephalitis                            | 1171 (993–1369)           | -17.5% (-24.6 to -8.8%)  | 8.6 (7.3–10.1)          | -6.9% (-11.2 to -2.6%)   |
|                      |                              | Tetanus                                 | 8 (5–18)                  | -96% (-98.8 to -84.9%)   | 0.1 (0–0.1)             | -93% (-97.7 to -76.5%)   |
|                      |                              | Brain and central nervous system cancer | 804 (568–1083)            | 94.4% (18.5 to 193.9%)   | 6.1 (4.3–8.1)           | 19.5% (-19.3 to 76.6%)   |
|                      |                              | Stroke*                                 | 22164 (20152–24408)       | 61.4% (53.1 to 70.1%)    | 179.3 (164–196.4)       | -18.6% (-22.5 to -14.7%) |
|                      |                              | Ischaemic stroke                        | 14837 (12917–16977)       | 85.1% (70.9 to 99.2%)    | 120.3 (105.4–136.8)     | -9.9% (-16.4 to -3.4%)   |
|                      |                              | Intracerebral haemorrhage               | 5745 (5231–6338)          | 22.3% (15.6 to 30%)      | 47.4 (43.3–52)          | -34% (-37.8 to -30.4%)   |
|                      |                              | Subarachnoid haemorrhage                | 1583 (1311–1935)          | 55.3% (40.2 to 72.7%)    | 11.6 (9.8–14)           | -22.3% (-28.4 to -15.2%) |
|                      |                              | Neurological disorders†                 | 1467183 (1302744–1640873) | 25.4% (18.6 to 32.1%)    | 9915 (8823.2–10985.6)   | 0.2% (-0.2 to 0.7%)      |
|                      |                              | Alzheimer's disease and other dementias | 9408 (8003–10910)         | 119.3% (108.2 to 130.6%) | 109.7 (93.7–125.5)      | 0.8% (-2.6 to 4.4%)      |
|                      |                              | Parkinson's disease                     | 1177 (1034–1333)          | 153.7% (130.8 to 177.6%) | 11.6 (10.3–12.9)        | 9.1% (0.1 to 19.3%)      |
|                      |                              | Idiopathic epilepsy                     | 5930 (1736–10195)         | 1.6% (-73.8 to 372.8%)   | 41.7 (12.2–71.8)        | 12.6% (-70.5 to 417.6%)  |
|                      |                              | Multiple sclerosis                      | 210 (172–253)             | 50.7% (38.9 to 64.2%)    | 1.5 (1.2–1.8)           | 20.4% (15.3 to 25.1%)    |
|                      |                              | Migraine                                | 191070 (160765–221406)    | 8% (0.1 to 15.9%)        | 1261.9 (1074.4–1450.5)  | 2.4% (1.9 to 2.9%)       |
|                      |                              | Tension-type headache                   | 1259310 (1101071–1426066) | 28.2% (20.3 to 35.8%)    | 8488 (7422.9–9561.3)    | -0.1% (-0.3 to 0.1%)     |
|                      |                              | Motor neuron disease                    | 79 (64–96)                | 18.3% (1 to 35.5%)       | 0.6 (0.5–0.7)           | 0% (-3.6 to 4.2%)        |
|                      | Other neurological disorders | 0 (0–0)                                 | 0% (0 to 0%)              | 0 (0–0)                  | 0% (0 to 0%)            |                          |
|                      | Headache disorders           | 1450380 (1285098–1623077)               | 25.1% (18.2 to 31.8%)     | 9749.8 (8662–10834.3)    | 0.2% (0 to 0.4%)        |                          |
| Tunisia              |                              | Meningitis                              | 2268 (1852–2674)          | -10.2% (-19.6 to 0.7%)   | 21.8 (17.9–25.8)        | -21.8% (-27.9 to -16.3%) |
|                      |                              | Encephalitis                            | 902 (772–1037)            | 15.7% (6.9 to 26%)       | 8.4 (7.1–9.8)           | -1.2% (-5.7 to 3.7%)     |
|                      |                              | Tetanus                                 | 4 (2–7)                   | -73.4% (-89.8 to -33.3%) | 0 (0–0.1)               | -78.8% (-92.1 to -47%)   |
|                      |                              | Brain and central nervous system cancer | 231 (156–316)             | 132.6% (41.8 to 241.1%)  | 1.9 (1.3–2.6)           | 39.4% (-12.3 to 103.2%)  |
|                      |                              | Stroke*                                 | 19659 (17619–22111)       | 136.2% (122.1 to 151.7%) | 159.6 (144–178.9)       | -1.2% (-6.6 to 4.3%)     |
|                      |                              | Ischaemic stroke                        | 15194 (13233–17660)       | 180.6% (159.2 to 204%)   | 123.4 (108.1–142.9)     | 15.9% (7.6 to 23.8%)     |
|                      |                              | Intracerebral haemorrhage               | 2884 (2533–3290)          | 47.1% (37.3 to 56.5%)    | 23.9 (21.1–27.3)        | -37.5% (-41.4 to -33.6%) |
|                      |                              | Subarachnoid haemorrhage                | 1581 (1313–1909)          | 67% (54.7 to 81.4%)      | 12.3 (10.3–14.7)        | -26.8% (-31.7 to -20.9%) |
|                      |                              | Neurological disorders†                 | 1171253 (1049587–1299980) | 45.3% (38.4 to 52.8%)    | 9908.4 (8818.4–10995.9) | 0.1% (-0.3 to 0.6%)      |

**Table S12** Burden, mortality, incidence, and prevalence of neurological conditions in North Africa and Middle East countries

| Measure                                 | Cause                                   | Location                                | All Ages                  |                          | Age-standardised         |                          |                       |
|-----------------------------------------|-----------------------------------------|-----------------------------------------|---------------------------|--------------------------|--------------------------|--------------------------|-----------------------|
|                                         |                                         |                                         | Number                    | Percent change           | Rate per 100,000         | Percent change           |                       |
|                                         |                                         |                                         | 2019                      | From 1990 to 2019        | 2019                     | From 1990 to 2019        |                       |
|                                         |                                         | Mean (95% UI)                           | Mean (95% UI)             | Mean (95% UI)            | Mean (95% UI)            |                          |                       |
| Türkiye                                 | Alzheimer's disease and other dementias |                                         | 12027 (10263–13810)       | 203·8% (188·7 to 220·8%) | 110·7 (94·6–126·2)       | 0·2% (-2·7 to 3·1%)      |                       |
|                                         | Parkinson's disease                     |                                         | 1234 (1096–1388)          | 195·9% (169·2 to 227·2%) | 10·5 (9·4–11·8)          | 12·5% (3·4 to 24·2%)     |                       |
|                                         | Idiopathic epilepsy                     |                                         | 4724 (1367–7778)          | 35·2% (-66·3 to 480·4%)  | 43·8 (12·5–72·7)         | 17·2% (-71·6 to 406·5%)  |                       |
|                                         | Multiple sclerosis                      |                                         | 214 (177–252)             | 85·5% (69·4 to 102·4%)   | 1·7 (1·4–2·1)            | 23·2% (17·7 to 28·2%)    |                       |
|                                         | Migraine                                |                                         | 139776 (120065–160031)    | 23·2% (16 to 31%)        | 1239·1 (1051·9–1427·3)   | 0·2% (0·1 to 0·3%)       |                       |
|                                         | Tension-type headache                   |                                         | 1013213 (890081–1140492)  | 48% (40 to 56·9%)        | 8502 (7441·4–9578·4)     | 0% (0 to 0·1%)           |                       |
|                                         | Motor neuron disease                    |                                         | 64 (53–78)                | 53·6% (37·7 to 69%)      | 0·5 (0·5–0·7)            | -1·8% (-5·2 to 1·9%)     |                       |
|                                         | Other neurological disorders            |                                         | 0 (0–0)                   | 0% (0 to 0%)             | 0 (0–0)                  | 0% (0 to 0%)             |                       |
|                                         | Headache disorders                      |                                         | 1152989 (1029232–1281523) | 44·5% (37·3 to 51·9%)    | 9741 (8652·7–10828·7)    | 0·1% (0 to 0·1%)         |                       |
|                                         | Meningitis                              |                                         | 4631 (3846–5447)          | -60·2% (-65·5 to -53·4%) | 6·7 (5·5–8)              | -63·2% (-66·9 to -59·1%) |                       |
|                                         | Encephalitis                            |                                         | 8083 (6976–9240)          | 11·8% (3·3 to 21·4%)     | 11·2 (9·6–13)            | -2·8% (-7·1 to 2%)       |                       |
|                                         | Tetanus                                 |                                         | 26 (18–38)                | -97·5% (-98·5 to -93·3%) | 0 (0–0)                  | -98·5% (-99·2 to -95·5%) |                       |
|                                         | Brain and central nervous system cancer |                                         | 6355 (2999–8787)          | 120·2% (21·9 to 234·3%)  | 7·6 (3·7–10·3)           | 25·9% (-26·3 to 82·2%)   |                       |
|                                         | Stroke*                                 |                                         | 125345 (114547–138123)    | 117·4% (106·2 to 130·1%) | 145·6 (133·4–160·7)      | -2·8% (-7·6 to 1·9%)     |                       |
|                                         | Ischaemic stroke                        |                                         | 81599 (71499–93648)       | 138·2% (120 to 158·2%)   | 95·4 (83·8–109·5)        | 4·7% (-3 to 12·8%)       |                       |
|                                         | Intracerebral haemorrhage               |                                         | 30027 (26923–33453)       | 93·1% (79·1 to 107·3%)   | 35·1 (31·4–39·1)         | -12·4% (-18·3 to -6·4%)  |                       |
|                                         | Subarachnoid haemorrhage                |                                         | 13719 (11850–15875)       | 74·8% (62·2 to 88·6%)    | 15·1 (13·1–17·4)         | -18·8% (-24·8 to -12·2%) |                       |
|                                         | Neurological disorders†                 |                                         | 8130897 (7269011–9079477) | 47·2% (39·6 to 54·4%)    | 9588·8 (8564·7–10698·3)  | 0·9% (-1·9 to 3·6%)      |                       |
|                                         | United Arab Emirates                    | Alzheimer's disease and other dementias |                           | 90963 (78271–103566)     | 187·5% (177·6 to 195·8%) | 112·9 (96·7–128·9)       | 1·5% (-1·8 to 4·5%)   |
|                                         |                                         | Parkinson's disease                     |                           | 10209 (8951–11496)       | 220·8% (198·1 to 247·2%) | 12·3 (10·8–13·8)         | 19·9% (11·6 to 29·7%) |
| Idiopathic epilepsy                     |                                         |                                         | 47294 (13980–76026)       | 47·5% (-54·5 to 511%)    | 63·5 (18·8–103·2)        | 28·1% (-60·8 to 432·1%)  |                       |
| Multiple sclerosis                      |                                         |                                         | 1562 (1484–1647)          | 53·6% (48·8 to 58·7%)    | 1·7 (1·6–1·8)            | -2% (-4·3 to 0·4%)       |                       |
| Migraine                                |                                         |                                         | 961458 (826618–1099316)   | 23·7% (15·5 to 32·7%)    | 1200·2 (1023·9–1384·3)   | 0·3% (-3 to 4·4%)        |                       |
| Tension-type headache                   |                                         |                                         | 7018674 (6183837–7932907) | 50% (41·3 to 59%)        | 8197·3 (7199·6–9252·4)   | 0·7% (-2·5 to 3·6%)      |                       |
| Motor neuron disease                    |                                         |                                         | 737 (640–840)             | 63·7% (53·4 to 74·5%)    | 0·9 (0·8–1)              | 7·9% (3·8 to 12%)        |                       |
| Other neurological disorders            |                                         |                                         | 0 (0–0)                   | 0% (0 to 0%)             | 0 (0–0)                  | 0% (0 to 0%)             |                       |
| Headache disorders                      |                                         |                                         | 7980132 (7127013–8917328) | 46·3% (39 to 53·5%)      | 9397·5 (8376·7–10486·8)  | 0·7% (-2·1 to 3·2%)      |                       |
| Meningitis                              |                                         |                                         | 1235 (997–1517)           | 126% (94·5 to 165·4%)    | 28·2 (24·1–33)           | -36% (-40·1 to -31·9%)   |                       |
| Encephalitis                            |                                         |                                         | 534 (444–621)             | 241·7% (200·6 to 288·3%) | 8·4 (7·1–9·8)            | -0·6% (-5·8 to 4·5%)     |                       |
| Tetanus                                 |                                         |                                         | 49 (19–82)                | 3·7% (-77·7 to 292%)     | 2·9 (0·4–5·3)            | -85·1% (-95·9 to -34·4%) |                       |
| Brain and central nervous system cancer |                                         |                                         | 479 (275–704)             | 641·7% (380·4 to 976·5%) | 5·7 (3·5–7·8)            | 8·7% (-35·1 to 65·6%)    |                       |
| Stroke*                                 |                                         |                                         | 14482 (12788–16501)       | 710·5% (643·9 to 778·5%) | 262·2 (233·8–294·3)      | -14·8% (-19·2 to -9·9%)  |                       |
| Ischaemic stroke                        |                                         |                                         | 10857 (9258–12752)        | 847·6% (743·8 to 952·1%) | 208·2 (180·3–240·9)      | -5% (-11·4 to 2·3%)      |                       |
| Intracerebral haemorrhage               |                                         |                                         | 2561 (2257–2883)          | 432·8% (394·6 to 479·2%) | 42·3 (38·1–47)           | -41·9% (-45·3 to -38·6%) |                       |
| Subarachnoid haemorrhage                |                                         |                                         | 1064 (849–1323)           | 562·9% (494·7 to 631·6%) | 11·7 (9·9–13·7)          | -25·2% (-29·9 to -20·7%) |                       |
| Neurological disorders†                 |                                         |                                         | 973713 (829158–1124932)   | 435·9% (391·1 to 480·3%) | 9865·6 (8796·4–10962·3)  | 0% (-0·7 to 0·6%)        |                       |
| Alzheimer's disease and other dementias |                                         |                                         | 1369 (1110–1622)          | 669·5% (600·8 to 739·7%) | 103·1 (86·7–119·4)       | -0·9% (-3·8 to 2·1%)     |                       |
| Parkinson's disease                     |                                         |                                         | 471 (402–563)             | 854·7% (769·4 to 943·5%) | 19 (17·1–21·2)           | 14·3% (7·1 to 21·3%)     |                       |
| Idiopathic epilepsy                     |                                         | 5334 (1502–8982)                        | 307·6% (17·5 to 1375·9%)  | 65·1 (18·4–106·5)        | -6% (-73·4 to 237·2%)    |                          |                       |
| Multiple sclerosis                      |                                         | 152 (120–190)                           | 498·6% (387·4 to 612·9%)  | 1·1 (0·9–1·2)            | 5% (-1·1 to 12·2%)       |                          |                       |

**Table S12** Burden, mortality, incidence, and prevalence of neurological conditions in North Africa and Middle East countries

| Measure                                 | Cause                                   | Location                  | All Ages                  |                          | Age-standardised          |                          |                      |
|-----------------------------------------|-----------------------------------------|---------------------------|---------------------------|--------------------------|---------------------------|--------------------------|----------------------|
|                                         |                                         |                           | Number                    | Percent change           | Rate per 100,000          | Percent change           |                      |
|                                         |                                         |                           | 2019                      | From 1990 to 2019        | 2019                      | From 1990 to 2019        |                      |
|                                         |                                         | Mean (95% UI)             | Mean (95% UI)             | Mean (95% UI)            | Mean (95% UI)             |                          |                      |
| Yemen                                   | Migraine                                |                           | 103202 (85999–123478)     | 338.5% (291.1 to 393.5%) | 1148.7 (968.7–1333.5)     | 0.3% (-0.2 to 1%)        |                      |
|                                         | Tension-type headache                   |                           | 863143 (722148–1015406)   | 451.2% (400.5 to 502.6%) | 8528.1 (7490.2–9612.7)    | -0.1% (-0.3 to 0.1%)     |                      |
|                                         | Motor neuron disease                    |                           | 42 (31–56)                | 516.2% (409.8 to 613.1%) | 0.5 (0.4–0.6)             | 8.5% (4.1 to 12.8%)      |                      |
|                                         | Other neurological disorders            |                           | 0 (0–0)                   | 0% (0 to 0%)             | 0 (0–0)                   | 0% (0 to 0%)             |                      |
|                                         | Headache disorders                      |                           | 966345 (822373–1117064)   | 436.5% (392.1 to 481.4%) | 9676.8 (8629.4–10745.8)   | 0% (-0.2 to 0.2%)        |                      |
|                                         | Meningitis                              |                           | 7684 (6256–9394)          | 15.2% (3.4 to 29.5%)     | 23.5 (20–27.6)            | -34.6% (-39.3 to -29.3%) |                      |
|                                         | Encephalitis                            |                           | 2888 (2393–3447)          | 89.1% (75.4 to 102.9%)   | 8.4 (7.2–9.8)             | -2% (-6.8 to 2.6%)       |                      |
|                                         | Tetanus                                 |                           | 86 (39–184)               | -82.3% (-94.2 to -29.8%) | 0.3 (0.2–0.7)             | -87% (-94.8 to -58.9%)   |                      |
|                                         | Brain and central nervous system cancer |                           | 842 (503–1211)            | 177.9% (48.6 to 409.1%)  | 3.9 (2.4–5.7)             | 26.2% (-26.8 to 104.5%)  |                      |
|                                         | Stroke*                                 |                           | 32051 (29342–34986)       | 145.9% (134.6 to 157.8%) | 207.9 (190.1–228.3)       | -9.5% (-14 to -4.7%)     |                      |
|                                         | Ischaemic stroke                        |                           | 21937 (19200–24782)       | 216.3% (194.7 to 239.4%) | 147.6 (129.8–168.3)       | 17.1% (9.1 to 25.7%)     |                      |
|                                         | Intracerebral haemorrhage               |                           | 7447 (6770–8165)          | 55.2% (47.8 to 62.4%)    | 44.7 (40.7–48.8)          | -45.8% (-48.6 to -42.9%) |                      |
|                                         | Subarachnoid haemorrhage                |                           | 2667 (2281–3109)          | 104.9% (90.7 to 122.2%)  | 15.5 (13.2–18.2)          | -26.3% (-31.3 to -20.2%) |                      |
|                                         | Neurological disorders†                 |                           | 2994086 (2628346–3374853) | 150% (143.6 to 156.7%)   | 9895.4 (8807.4–10988.4)   | 0% (-0.4 to 0.4%)        |                      |
|                                         | Alzheimer's disease and other dementias |                           | 9717 (8284–11147)         | 187.9% (177 to 199.2%)   | 109.3 (93.5–124.4)        | -2.7% (-5.7 to 0.3%)     |                      |
|                                         | Afghanistan                             | Parkinson's disease       |                           | 1005 (878–1130)          | 207.8% (183.7 to 237.2%)  | 8.8 (7.8–9.8)            | 11.5% (3.4 to 21.9%) |
|                                         |                                         | Idiopathic epilepsy       |                           | 12744 (3088–23978)       | 118.1% (-53.8 to 1156.3%) | 35.3 (8.5–66)            | 4.1% (-78 to 476%)   |
| Multiple sclerosis                      |                                         |                           | 268 (216–324)             | 233.9% (217.3 to 251.1%) | 0.9 (0.7–1)               | 17.1% (11.5 to 22.6%)    |                      |
| Migraine                                |                                         |                           | 441953 (365086–521903)    | 136.6% (126.1 to 146.9%) | 1236.1 (1049.1–1424.3)    | -0.1% (-0.3 to 0%)       |                      |
| Tension-type headache                   |                                         |                           | 2528256 (2163210–2899036) | 152.5% (145.1 to 159.9%) | 8504.5 (7443.4–9580.9)    | 0% (0 to 0.1%)           |                      |
| Motor neuron disease                    |                                         |                           | 144 (116–173)             | 111.3% (93 to 130.7%)    | 0.5 (0.4–0.7)             | 1% (-2.7 to 5.3%)        |                      |
| Other neurological disorders            |                                         |                           | 0 (0–0)                   | 0% (0 to 0%)             | 0 (0–0)                   | 0% (0 to 0%)             |                      |
| Headache disorders                      |                                         |                           | 2970209 (2605021–3349282) | 150% (143.5 to 156.6%)   | 9740.6 (8655.2–10825.6)   | 0% (-0.1 to 0.1%)        |                      |
| Meningitis                              |                                         |                           | 25187 (21806–28902)       | 75.6% (64.8 to 88.3%)    | 86.2 (76.3–96.4)          | -35.7% (-38.3 to -32.9%) |                      |
| Encephalitis                            |                                         |                           | 7014 (6176–8040)          | 225.2% (209.5 to 242.2%) | 19.4 (17.5–21.5)          | 0.1% (-3.8 to 4.2%)      |                      |
| Tetanus                                 |                                         |                           | 1096 (645–1872)           | -71.2% (-85.3 to -40%)   | 3.4 (2–5.2)               | -86.8% (-92.3 to -75.7%) |                      |
| Brain and central nervous system cancer |                                         |                           | 1264 (694–2276)           | 152% (64 to 330.3%)      | 5.1 (3–9.3)               | 2.3% (-33.1 to 60.9%)    |                      |
| Stroke*                                 |                                         |                           | 36785 (33645–40296)       | 111.8% (99.3 to 123.9%)  | 217.7 (200.8–238.5)       | -7.7% (-11.8 to -3.2%)   |                      |
| Ischaemic stroke                        |                                         |                           | 22218 (19362–25555)       | 154.7% (130.9 to 180.7%) | 140.3 (123.4–159.4)       | 18.9% (10.7 to 27.7%)    |                      |
| Intracerebral haemorrhage               |                                         |                           | 11653 (10651–12823)       | 63.2% (53.8 to 73.7%)    | 61 (56–66.3)              | -37.6% (-40.2 to -34.7%) |                      |
| Subarachnoid haemorrhage                |                                         |                           | 2914 (2471–3422)          | 93.4% (75.2 to 115.5%)   | 16.3 (13.8–19.3)          | -19.2% (-24 to -12.1%)   |                      |
| Neurological disorders†                 |                                         |                           | 3489660 (3052224–3961436) | 238.5% (228.4 to 247.1%) | 9901.9 (8816.5–10966.1)   | 0% (-0.5 to 0.6%)        |                      |
| Alzheimer's disease and other dementias |                                         | 8459 (7105–9788)          | 55.2% (48.4 to 62.1%)     | 109.4 (92.9–125.6)       | -1.9% (-5.1 to 1.6%)      |                          |                      |
| Parkinson's disease                     |                                         | 1102 (984–1236)           | 63.2% (48.2 to 78.2%)     | 10.5 (9.5–11.6)          | -2.8% (-8.8 to 4%)        |                          |                      |
| Idiopathic epilepsy                     |                                         | 16073 (2945–31796)        | 234.2% (-28.5 to 2078.6%) | 35.5 (6.5–69.7)          | -2.6% (-79.7 to 535%)     |                          |                      |
| Multiple sclerosis                      |                                         | 588 (490–704)             | 342.8% (318 to 368.5%)    | 1.6 (1.4–1.9)            | 12.3% (7.4 to 17.5%)      |                          |                      |
| Migraine                                |                                         | 524948 (430066–623815)    | 255% (247.6 to 264.2%)    | 1229 (1042.8–1418)       | -2.2% (-2.7 to -1.8%)     |                          |                      |
| Tension-type headache                   |                                         | 2938263 (2512679–3388697) | 237% (225.6 to 247%)      | 8515.2 (7457.9–9593.9)   | 0.4% (0.2 to 0.6%)        |                          |                      |
| Motor neuron disease                    |                                         | 226 (182–278)             | 203.3% (184.4 to 223.2%)  | 0.7 (0.6–0.8)            | 2.1% (-1 to 5.8%)         |                          |                      |
| Other neurological disorders            |                                         | 0 (0–0)                   | 0% (0 to 0%)              | 0 (0–0)                  | 0% (0 to 0%)              |                          |                      |

**Table S12** Burden, mortality, incidence, and prevalence of neurological conditions in North Africa and Middle East countries

|                    |                                         | All Ages                           |                          | Age-standardised          |                          |
|--------------------|-----------------------------------------|------------------------------------|--------------------------|---------------------------|--------------------------|
| Measure            | Location                                | Number                             | Percent change           | Rate per 100,000          | Percent change           |
|                    |                                         | 2019                               | From 1990 to 2019        | 2019                      | From 1990 to 2019        |
| Cause              |                                         | Mean (95% UI)                      | Mean (95% UI)            | Mean (95% UI)             | Mean (95% UI)            |
| Sudan              | Headache disorders                      | 3463211 (3022728–3937188)          | 239·6% (230 to 248·4%)   | 9744·2 (8662·8–10828·1)   | 0·1% (-0·1 to 0·3%)      |
|                    | Meningitis                              | 5966 (4872–7163)                   | -60·6% (-63·9 to -57·1%) | 14 (11·9–16·4)            | -74·4% (-75·9 to -72·6%) |
|                    | Encephalitis                            | 3596 (2974–4272)                   | 71·3% (59·9 to 82·7%)    | 8·3 (7–9·6)               | -3·4% (-7·6 to 0·9%)     |
|                    | Tetanus                                 | 58 (27–122)                        | -91% (-96·5 to -75·3%)   | 0·2 (0·1–0·4)             | -92·6% (-96·8 to -84·1%) |
|                    | Brain and central nervous system cancer | 1354 (800–1961)                    | 111% (2·4 to 346·1%)     | 4·4 (2·6–6·2)             | 16·6% (-35·3 to 106·5%)  |
|                    | Stroke*                                 | 48595 (44282–53816)                | 101% (91 to 112·3%)      | 227·1 (205–253·2)         | -4·8% (-9·7 to 0·9%)     |
|                    | Ischaemic stroke                        | 34529 (30159–39646)                | 157·6% (139·6 to 178·8%) | 166·7 (145–190·9)         | 22·7% (14·3 to 32·1%)    |
|                    | Intracerebral haemorrhage               | 10580 (9645–11599)                 | 24·2% (17·5 to 30·6%)    | 45·8 (41·6–50·2)          | -44·3% (-47·4 to -41·5%) |
|                    | Subarachnoid haemorrhage                | 3486 (3000–4062)                   | 54·4% (43·3 to 65·9%)    | 14·6 (12·5–17)            | -28·8% (-33·5 to -23·9%) |
|                    | Neurological disorders†                 | 3902295 (3426301–4410513)          | 114% (111·1 to 116·9%)   | 9879·3 (8797·9–10946·5)   | -0·1% (-0·6 to 0·3%)     |
|                    | Alzheimer's disease and other dementias | 14895 (12715–17101)                | 107·3% (97·2 to 117·9%)  | 108·2 (92·1–123·5)        | -1·3% (-4·4 to 1·8%)     |
|                    | Parkinson's disease                     | 1552 (1379–1745)                   | 94·7% (77·4 to 114·4%)   | 9·4 (8·4–10·6)            | -1·2% (-8·9 to 7·9%)     |
|                    | Idiopathic epilepsy                     | 17413 (4224–32374)                 | 104·9% (-50·1 to 982·3%) | 38 (9·2–69·8)             | 10·1% (-72·8 to 488·9%)  |
|                    | Multiple sclerosis                      | 352 (282–426)                      | 169·4% (156·9 to 182·3%) | 0·9 (0·7–1)               | 16·9% (12·1 to 22%)      |
|                    | Migraine                                | 566587 (470251–665008)             | 110% (105·7 to 113·9%)   | 1240 (1052·1–1428·4)      | -0·3% (-0·4 to -0·1%)    |
|                    | Tension-type headache                   | 3301315 (2843973–3772470)          | 114·8% (111·7 to 117·8%) | 8482·4 (7418·8–9558·5)    | -0·1% (-0·2 to -0·1%)    |
|                    | Motor neuron disease                    | 182 (147–220)                      | 80·9% (68·1 to 93·4%)    | 0·5 (0·4–0·6)             | -1·7% (-5·2 to 2·6%)     |
|                    | Other neurological disorders            | 0 (0–0)                            | 0% (0 to 0%)             | 0 (0–0)                   | 0% (0 to 0%)             |
| Headache disorders | 3867901 (3387749–4370946)               | 114·1% (111·4 to 116·6%)           | 9722·3 (8634·6–10808)    | -0·2% (-0·2 to -0·1%)     |                          |
| <b>Prevalence</b>  |                                         |                                    |                          |                           |                          |
| Global             | Meningitis                              | 7683540 (6590288–9132199)          | -23·7% (-26 to -21·1%)   | 99·9 (85·5–118·8)         | -47·2% (-48·7 to -45·5%) |
|                    | Encephalitis                            | 4499425 (3372091–5573174)          | 4·7% (1·6 to 8·9%)       | 56·8 (42·6–70·3)          | -31·9% (-33·9 to -28·5%) |
|                    | Tetanus                                 | 61660 (44603–81241)                | -64·4% (-68·1 to -61·2%) | 0·8 (0·6–1·1)             | -73·7% (-76·2 to -71·5%) |
|                    | Brain and central nervous system cancer | 1065294 (800441–1199906)           | 151·5% (50·8 to 195·7%)  | 13·5 (10·1–15·2)          | 59·7% (-2·4 to 86·2%)    |
|                    | Stroke*                                 | 101474558 (93211910–110526302)     | 85·3% (82·6 to 88·2%)    | 1240·3 (1139·7–1353)      | -6·1% (-7·2 to -5%)      |
|                    | Ischaemic stroke                        | 77192499 (68857178–86457604)       | 95·3% (91·7 to 99·3%)    | 951 (849·8–1064·1)        | -1·9% (-3·4 to -0·4%)    |
|                    | Intracerebral haemorrhage               | 20663889 (18016197–23417927)       | 57·8% (56·1 to 59·6%)    | 248·8 (217·1–281·4)       | -16·8% (-18·2 to -15·4%) |
|                    | Subarachnoid haemorrhage                | 8396541 (7188193–9833329)          | 64·5% (60·4 to 68%)      | 101·6 (87·1–118·5)        | -12·9% (-15 to -11·5%)   |
|                    | Neurological disorders†                 | 2658932358 (2452847930–2858528818) | 54·9% (52·4 to 57·4%)    | 33451·9 (30870·7–36082)   | 0·4% (-0·1 to 0·9%)      |
|                    | Alzheimer's disease and other dementias | 51624193 (44276969–59021502)       | 160·9% (156 to 166·3%)   | 682·5 (585·2–782·7)       | 5·7% (4·3 to 7%)         |
|                    | Parkinson's disease                     | 8511022 (7288530–9841378)          | 155·5% (150·4 to 161%)   | 106·3 (91·2–122·2)        | 15·9% (13·3 to 18·5%)    |
|                    | Idiopathic epilepsy                     | 25111110 (19033571–31433013)       | 63·9% (39·3 to 93%)      | 326·3 (247·8–408·3)       | 13% (-3·4 to 31·8%)      |
|                    | Multiple sclerosis                      | 1756792 (1531919–1973623)          | 71·7% (66·3 to 76·8%)    | 21·3 (18·5–23·9)          | -6·2% (-8·7 to -3·8%)    |
|                    | Migraine                                | 1128087261 (979598830–1298138078)  | 56·3% (52·3 to 60·5%)    | 14107·3 (12270·3–16239)   | 1·7% (0·7 to 2·8%)       |
|                    | Tension-type headache                   | 1995172549 (1751946846–2242204885) | 52·6% (49·2 to 55·9%)    | 25113·5 (22020·8–28316·2) | -0·8% (-1·5 to 0%)       |

**Table S12** Burden, mortality, incidence, and prevalence of neurological conditions in North Africa and Middle East countries

| Measure                                 |                                         | All Ages                           |                                     | Age-standardised          |                                     |                      |
|-----------------------------------------|-----------------------------------------|------------------------------------|-------------------------------------|---------------------------|-------------------------------------|----------------------|
|                                         |                                         | Number<br>2019                     | Percent change<br>From 1990 to 2019 | Rate per 100,000<br>2019  | Percent change<br>From 1990 to 2019 |                      |
| Cause                                   | Location                                | Mean (95% UI)                      | Mean (95% UI)                       | Mean (95% UI)             | Mean (95% UI)                       |                      |
| North Africa and Middle East            | Motor neuron disease                    | 268674 (231894–310664)             | 68·9% (62·5 to 75·7%)               | 3·4 (2·9–3·9)             | 1·9% (0·6 to 3·4%)                  |                      |
|                                         | Other neurological disorders            | 56882 (39066–77832)                | 66·3% (56·8 to 77%)                 | 0·7 (0·5–1)               | 6·4% (3·6 to 9·5%)                  |                      |
|                                         | Headache disorders                      | 2602898103 (2396738294–2805119610) | 54% (51·5 to 56·5%)                 | 32716·8 (30148·4–35335)   | 0·2% (-0·3 to 0·8%)                 |                      |
|                                         | Meningitis                              | 356233 (306659–419924)             | 5·7% (-1·6 to 14%)                  | 60·5 (52·2–71·1)          | -44·7% (-48·4 to -40·7%)            |                      |
|                                         | Encephalitis                            | 167496 (127752–205936)             | 79·3% (73·4 to 86·9%)               | 28 (21·2–34·6)            | -10·4% (-13·5 to -5·9%)             |                      |
|                                         | Tetanus                                 | 748 (500–1074)                     | -35·7% (-53·8 to -16·2%)            | 0·1 (0·1–0·2)             | -61·7% (-70·5 to -51·9%)            |                      |
|                                         | Brain and central nervous system cancer | 97195 (64216–115621)               | 280·5% (113·9 to 424·7%)            | 16·5 (10·8–19·5)          | 119·1% (30·2 to 189·1%)             |                      |
|                                         | Stroke*                                 | 7323421 (6794727–7863138)          | 142·1% (137·8 to 146·3%)            | 1537·5 (1421·9–1659·9)    | -0·5% (-2·3 to 1·1%)                |                      |
|                                         | Ischaemic stroke                        | 5998774 (5473979–6566718)          | 157·6% (152·8 to 162·7%)            | 1303·6 (1183·2–1435·4)    | 5·9% (3·6 to 8%)                    |                      |
|                                         | Intracerebral haemorrhage               | 1301257 (1169230–1441443)          | 89·8% (86 to 93·8%)                 | 241·6 (217·5–265·7)       | -21·1% (-23·1 to -19·2%)            |                      |
|                                         | Subarachnoid haemorrhage                | 376883 (320184–444637)             | 103·4% (85 to 112·9%)               | 64 (54·5–75·3)            | -18·1% (-26·3 to -14·1%)            |                      |
|                                         | Neurological disorders†                 | 208460497 (190465729–226945563)    | 101·2% (95·9 to 106·6%)             | 34170·6 (31389·5–37068·5) | 1·4% (0·6 to 2·3%)                  |                      |
|                                         | Alzheimer's disease and other dementias | 2485062 (2117243–2864990)          | 184·5% (178·1 to 190·7%)            | 777·6 (660·8–896)         | 3% (1·5 to 4·6%)                    |                      |
|                                         | Parkinson's disease                     | 309887 (264964–362774)             | 199·5% (188·8 to 211·2%)            | 82·6 (70·2–95·6)          | 15·4% (11·5 to 20%)                 |                      |
|                                         | Idiopathic epilepsy                     | 1990924 (1360240–2600038)          | 77·6% (26·2 to 150·6%)              | 336·9 (231·8–437·4)       | 8·6% (-23 to 52·4%)                 |                      |
|                                         | Algeria                                 | Multiple sclerosis                 | 222696 (190733–256781)              | 171·3% (165·8 to 176·5%)  | 39 (33·6–44·7)                      | 11·5% (10 to 12·8%)  |
|                                         |                                         | Migraine                           | 96931476 (83756714–112609351)       | 100·9% (92·7 to 108·8%)   | 15355 (13305·5–17806)               | -0·1% (-1·5 to 1·4%) |
| Tension-type headache                   |                                         | 149061721 (128455947–170990926)    | 102·2% (93·5 to 111%)               | 24504·5 (21304·8–27987·5) | 2% (0·7 to 3·4%)                    |                      |
| Motor neuron disease                    |                                         | 15574 (12657–19025)                | 103·3% (92·1 to 113·8%)             | 2·6 (2·1–3·1)             | 3·5% (2 to 5·1%)                    |                      |
| Other neurological disorders            |                                         | 3937 (2627–5514)                   | 96·6% (81 to 113·8%)                | 0·7 (0·5–1)               | 0·3% (-0·9 to 1·5%)                 |                      |
| Headache disorders                      |                                         | 205280354 (186994538–223750113)    | 100·9% (95·4 to 106·3%)             | 33389·7 (30530·9–36328·1) | 1·3% (0·5 to 2·2%)                  |                      |
| Meningitis                              |                                         | 21625 (17717–26763)                | 21·7% (-1·1 to 48·1%)               | 53·2 (43·5–65·7)          | -32·3% (-45·1 to -17·5%)            |                      |
| Encephalitis                            |                                         | 9650 (7397–11935)                  | 87·5% (76·2 to 99·4%)               | 23·2 (17·7–28·8)          | -0·2% (-6·2 to 6·6%)                |                      |
| Tetanus                                 |                                         | 12 (7–20)                          | -10·2% (-45·5 to 17·6%)             | 0 (0–0)                   | -45·1% (-65·9 to -28·6%)            |                      |
| Brain and central nervous system cancer |                                         | 3451 (2055–4639)                   | 240·6% (80·2 to 401·8%)             | 8·3 (4·9–11·1)            | 118·4% (15·6 to 213·7%)             |                      |
| Stroke*                                 |                                         | 549736 (506627–592960)             | 129% (118·8 to 139·1%)              | 1540·3 (1417·2–1668)      | -10·7% (-14·5 to -7%)               |                      |
| Ischaemic stroke                        |                                         | 469983 (427467–513763)             | 150·1% (138·7 to 161·4%)            | 1347·1 (1227–1477·6)      | -2·6% (-6·7 to 1·7%)                |                      |
| Intracerebral haemorrhage               |                                         | 78698 (70922–86722)                | 50% (43·8 to 56·9%)                 | 201·9 (182·3–221·3)       | -39·9% (-42·7 to -37·1%)            |                      |
| Subarachnoid haemorrhage                |                                         | 27321 (21829–32379)                | 97·8% (51·7 to 114·1%)              | 64·7 (51·8–76·8)          | -24·2% (-43 to -17·1%)              |                      |
| Neurological disorders†                 |                                         | 14066371 (12788073–15402985)       | 86·2% (78·9 to 93·9%)               | 33570·1 (30564·3–36622·8) | 0·1% (-0·7 to 1%)                   |                      |
| Alzheimer's disease and other dementias |                                         | 193058 (162815–224021)             | 231·7% (211·8 to 253·3%)            | 777·5 (659·7–898·6)       | 1·5% (-1·9 to 4·8%)                 |                      |
| Parkinson's disease                     |                                         | 23956 (19889–28839)                | 217·4% (181 to 255·3%)              | 80·4 (66·5–96·8)          | 10·2% (-1·1 to 22%)                 |                      |
| Idiopathic epilepsy                     | 131094 (38570–214998)                   | 40·1% (-62·6 to 496·7%)            | 322·5 (94·5–529·8)                  | -7·9% (-76·4 to 293%)     |                                     |                      |
| Multiple sclerosis                      | 17581 (14373–21340)                     | 222·5% (203·8 to 242%)             | 41·9 (34·2–50·6)                    | 26·4% (20·4 to 33·6%)     |                                     |                      |
| Migraine                                | 6629210 (5653007–7727155)               | 87·9% (76·8 to 98·6%)              | 15365·7 (13120·8–17933·6)           | -0·1% (-0·2 to 0%)        |                                     |                      |
| Tension-type headache                   | 9888031 (8443602–11527577)              | 85·5% (74·2 to 98·1%)              | 23647·6 (20341·2–27276·9)           | -0·1% (-0·1 to 0%)        |                                     |                      |



**Table S12** Burden, mortality, incidence, and prevalence of neurological conditions in North Africa and Middle East countries

| Measure                      |                                         | All Ages                     |                           | Age-standardised          |                          |
|------------------------------|-----------------------------------------|------------------------------|---------------------------|---------------------------|--------------------------|
|                              |                                         | Number                       | Percent change            | Rate per 100,000          | Percent change           |
|                              |                                         | 2019                         | From 1990 to 2019         | 2019                      | From 1990 to 2019        |
| Cause                        | Location                                | Mean (95% UI)                | Mean (95% UI)             | Mean (95% UI)             | Mean (95% UI)            |
| Bahrain                      | Motor neuron disease                    | 997 (799–1217)               | 89·8% (74·6 to 104·9%)    | 2·4 (1·9–2·8)             | 2% (-1·6 to 5·7%)        |
|                              | Other neurological disorders            | 277 (185–389)                | 91·2% (70·5 to 114·3%)    | 0·7 (0·5–1)               | -0·1% (-0·2 to 0·1%)     |
|                              | Headache disorders                      | 13831109 (12549817–15188452) | 85·9% (78·2 to 93·4%)     | 32788·5 (29733·8–35917·9) | 0·1% (-0·4 to 0·7%)      |
|                              | Meningitis                              | 595 (485–726)                | 76·6% (45 to 110·6%)      | 40·1 (32·7–48·6)          | -46·2% (-56·2 to -35·5%) |
|                              | Encephalitis                            | 266 (208–332)                | 212·3% (193·4 to 232·4%)  | 17·1 (13·3–21·4)          | -4·4% (-10·7 to 2%)      |
|                              | Tetanus                                 | 1 (0–2)                      | 168·5% (143·6 to 196·5%)  | 0·1 (0–0·1)               | -5·9% (-15·2 to 3·8%)    |
|                              | Brain and central nervous system cancer | 206 (123–279)                | 723·9% (389·9 to 1098·2%) | 14·8 (9·4–19·3)           | 147·5% (49·6 to 250·5%)  |
|                              | Stroke*                                 | 14539 (13369–15844)          | 292·5% (272·2 to 313·4%)  | 1136·4 (1049–1234·8)      | -24·2% (-27·5 to -20·8%) |
|                              | Ischaemic stroke                        | 11186 (10069–12387)          | 297·3% (276·9 to 317·4%)  | 949·2 (859·7–1048·7)      | -23·8% (-27·5 to -20·2%) |
|                              | Intracerebral haemorrhage               | 2862 (2545–3203)             | 223·4% (207·8 to 239·9%)  | 186 (166·5–205·7)         | -31·2% (-34·4 to -28·1%) |
|                              | Subarachnoid haemorrhage                | 1059 (873–1262)              | 361·9% (326·7 to 396·5%)  | 53·2 (44·2–63·1)          | -6·4% (-11·9 to -1·2%)   |
|                              | Neurological disorders†                 | 524416 (473877–576693)       | 221·5% (205·6 to 238·1%)  | 33112·7 (30197·4–36147)   | -0·1% (-1·2 to 1%)       |
|                              | Alzheimer's disease and other dementias | 3757 (3198–4348)             | 450·3% (424·1 to 479·2%)  | 801·1 (684·2–925·8)       | 3·5% (0·2 to 7·1%)       |
|                              | Parkinson's disease                     | 674 (552–825)                | 493·1% (408·4 to 582·9%)  | 94 (75·9–113·4)           | 12·5% (-5·2 to 33·3%)    |
|                              | Idiopathic epilepsy                     | 5530 (1707–9062)             | 143·6% (-26·4 to 883·4%)  | 450·6 (140·2–726·5)       | -10·6% (-72·9 to 252·3%) |
|                              | Multiple sclerosis                      | 592 (471–734)                | 484·5% (438·6 to 535·1%)  | 32·7 (26·3–40·3)          | 29·1% (21·6 to 36·4%)    |
| Migraine                     | 239676 (205264–279890)                  | 215·9% (197·3 to 237·3%)     | 14419·8 (12318·8–16876·2) | -0·7% (-1 to -0·3%)       |                          |
| Tension-type headache        | 377845 (318458–442847)                  | 224·3% (196·2 to 253%)       | 23716 (20422–27274·1)     | -0·1% (-0·3 to 0·1%)      |                          |
| Egypt                        | Motor neuron disease                    | 46 (36–58)                   | 235·2% (197·8 to 274·8%)  | 2·8 (2·3–3·4)             | 3·7% (-0·5 to 7·9%)      |
|                              | Other neurological disorders            | 10 (7–15)                    | 251·2% (197·9 to 315·7%)  | 0·7 (0·5–0·9)             | -0·4% (-0·9 to 0%)       |
|                              | Headache disorders                      | 517784 (467000–570886)       | 221·6% (205 to 238·3%)    | 32232·2 (29237–35273·3)   | -0·1% (-0·6 to 0·5%)     |
|                              | Meningitis                              | 60577 (49274–75589)          | 5·3% (-15·3 to 29·8%)     | 63·8 (51·9–79·7)          | -42·7% (-54·3 to -29·3%) |
|                              | Encephalitis                            | 27214 (20780–33672)          | 52·4% (42·3 to 64·1%)     | 28·5 (21·5–35·6)          | -20·2% (-25·6 to -14%)   |
|                              | Tetanus                                 | 128 (76–195)                 | -36·6% (-54·2 to -18%)    | 0·1 (0·1–0·2)             | -63·5% (-73·5 to -53·2%) |
|                              | Brain and central nervous system cancer | 8411 (5551–11708)            | 226·4% (63·4 to 401·9%)   | 8·7 (5·9–12)              | 81·5% (1·2 to 172%)      |
|                              | Stroke*                                 | 1269834 (1170811–1374639)    | 151·8% (140·2 to 163·9%)  | 1806·1 (1658·1–1974·5)    | 18·5% (12·9 to 23·9%)    |
|                              | Ischaemic stroke                        | 1089819 (991038–1194962)     | 181·7% (168·2 to 194·4%)  | 1597 (1436·4–1765·4)      | 31·7% (24·9 to 38·1%)    |
|                              | Intracerebral haemorrhage               | 191761 (173529–212078)       | 69% (62·2 to 75·9%)       | 236·1 (213·7–260·5)       | -21·7% (-25·2 to -18·5%) |
|                              | Subarachnoid haemorrhage                | 54368 (45386–64247)          | 68·6% (46·1 to 79·3%)     | 61·4 (51·6–72·5)          | -21·5% (-33 to -16·4%)   |
|                              | Neurological disorders†                 | 34352847 (31415782–37326127) | 96·6% (89 to 104·2%)      | 35726·9 (32855·2–38512·6) | 2·8% (-0·8 to 6·7%)      |
|                              | Alzheimer's disease and other dementias | 295756 (250876–342572)       | 121·4% (113·8 to 129·1%)  | 750·4 (635·6–866·1)       | 5·2% (1·4 to 8·7%)       |
|                              | Parkinson's disease                     | 43837 (36133–52603)          | 148·8% (120 to 177·7%)    | 84·4 (69·1–101)           | 17·3% (3·6 to 30·7%)     |
|                              | Idiopathic epilepsy                     | 274828 (77862–460774)        | 84·3% (-49·4 to 746%)     | 275·4 (79·2–459·6)        | 8·2% (-70·5 to 395%)     |
|                              | Multiple sclerosis                      | 17764 (14045–21567)          | 160·1% (150 to 171·7%)    | 20·6 (16·4–25)            | 22·2% (17·7 to 27·4%)    |
| Migraine                     | 15818651 (13828617–18240820)            | 97·4% (83·2 to 112·2%)       | 15809·3 (13960·9–18055·5) | 1·8% (-5 to 9%)           |                          |
| Tension-type headache        | 25094802 (21538924–28759918)            | 97·1% (85·8 to 108·5%)       | 26290·9 (22878·1–29775·3) | 3·6% (-1·6 to 9·5%)       |                          |
| Motor neuron disease         | 2135 (1705–2641)                        | 96·4% (87·1 to 105·5%)       | 2·2 (1·8–2·7)             | 4·2% (0·6 to 8·2%)        |                          |
| Other neurological disorders | 619 (413–862)                           | 88·8% (80·3 to 97·3%)        | 0·7 (0·5–1)               | 0% (-0·2 to 0·3%)         |                          |



**Table S12** Burden, mortality, incidence, and prevalence of neurological conditions in North Africa and Middle East countries

|                                         |                                         | All Ages                     |                              | Age-standardised          |                           |                         |
|-----------------------------------------|-----------------------------------------|------------------------------|------------------------------|---------------------------|---------------------------|-------------------------|
| Measure                                 | Location                                | Number                       | Percent change               | Rate per 100,000          | Percent change            |                         |
|                                         |                                         | 2019                         | From 1990 to 2019            | 2019                      | From 1990 to 2019         |                         |
| Cause                                   |                                         | Mean (95% UI)                | Mean (95% UI)                | Mean (95% UI)             | Mean (95% UI)             |                         |
| Iran (Islamic Republic of)              | Headache disorders                      | 33951125 (31033203–36963035) | 96·5% (89·3 to 104·5%)       | 35022·4 (32158–37899·9)   | 2·7% (-0·8 to 6·7%)       |                         |
|                                         | Meningitis                              | 58747 (50149–69255)          | 3% (-5·1 to 12·2%)           | 69·4 (59·2–82)            | -35·7% (-40·3 to -30·8%)  |                         |
|                                         | Encephalitis                            | 20904 (16204–25628)          | 52·4% (47·1 to 59·2%)        | 24·2 (18·8–29·7)          | -10·8% (-13·8 to -6·1%)   |                         |
|                                         | Tetanus                                 | 20 (11–32)                   | -58·9% (-72·9 to -44·9%)     | 0 (0–0)                   | -69·4% (-78·2 to -61·1%)  |                         |
|                                         | Brain and central nervous system cancer | 23225 (12066–29504)          | 221·6% (78·6 to 352·2%)      | 27·7 (14·4–35·1)          | 129·4% (36·1 to 203·2%)   |                         |
|                                         | Stroke*                                 | 963512 (859232–1079662)      | 123·4% (115·9 to 131·2%)     | 1253·8 (1113·5–1418·4)    | -13·3% (-15·9 to -10·7%)  |                         |
|                                         | Ischaemic stroke                        | 849042 (736693–971863)       | 123·9% (115·1 to 132·9%)     | 1127·4 (977–1300·9)       | -13·1% (-16·1 to -10·1%)  |                         |
|                                         | Intracerebral haemorrhage               | 115797 (99985–132722)        | 89·9% (83·3 to 96·5%)        | 138·3 (120·1–157·2)       | -16·3% (-19·5 to -13·1%)  |                         |
|                                         | Subarachnoid haemorrhage                | 45366 (37280–54943)          | 127·3% (117·8 to 136·1%)     | 49·4 (40·8–59·3)          | -7·1% (-8·9 to -5·2%)     |                         |
|                                         | Neurological disorders†                 | 33461615 (30981852–35941056) | 81·4% (73·2 to 90%)          | 38297·2 (35449·7–41091·4) | 5·3% (3·4 to 7·3%)        |                         |
|                                         | Alzheimer's disease and other dementias | 470948 (397868–542859)       | 303·8% (282·7 to 328·6%)     | 789 (667·8–910·4)         | 1·6% (-0·3 to 3·2%)       |                         |
|                                         | Parkinson's disease                     | 56514 (47335–66920)          | 260·9% (235 to 285·6%)       | 85·1 (70·2–101·3)         | 13·1% (10·4 to 15·8%)     |                         |
|                                         | Idiopathic epilepsy                     | 281691 (192954–373635)       | 28·3% (-5·1 to 72·5%)        | 352·8 (240·3–465·2)       | 1·5% (-24 to 35·3%)       |                         |
|                                         | Multiple sclerosis                      | 46854 (39948–53742)          | 135·2% (124·4 to 145·7%)     | 51·2 (44·1–58·5)          | -4·9% (-8·2 to -1·6%)     |                         |
|                                         | Migraine                                | 14579445 (12748031–16637964) | 75·8% (63·4 to 88·4%)        | 16048·8 (14063·2–18371·8) | -0·5% (-4 to 2·8%)        |                         |
|                                         | Tension-type headache                   | 25772952 (22795090–28770049) | 88·3% (74·4 to 101·8%)       | 29640·4 (26202·1–32949·4) | 9·7% (6·5 to 13·1%)       |                         |
|                                         | Motor neuron disease                    | 2546 (2012–3187)             | 86·9% (70·6 to 103·5%)       | 2·9 (2·3–3·5)             | 6·6% (4·9 to 8·4%)        |                         |
|                                         | Other neurological disorders            | 540 (356–773)                | 69·6% (46·7 to 96·5%)        | 0·6 (0·4–0·9)             | 0·2% (-0·1 to 0·4%)       |                         |
|                                         | Iraq                                    | Headache disorders           | 32958409 (30482353–35496741) | 81% (72·7 to 89·6%)       | 37542·1 (34654·1–40354·8) | 5·4% (3·5 to 7·5%)      |
|                                         |                                         | Meningitis                   | 23872 (19687–29101)          | 46·7% (18·5 to 80·2%)     | 59·8 (49·5–72·5)          | -42% (-53·5 to -28·6%)  |
| Encephalitis                            |                                         | 11216 (8551–13841)           | 131·8% (119·3 to 146·5%)     | 28·4 (21·2–35·2)          | -13·3% (-18·3 to -7·4%)   |                         |
| Tetanus                                 |                                         | 46 (29–67)                   | -23·6% (-51·5 to 6·3%)       | 0·1 (0·1–0·2)             | -63·5% (-73·9 to -53·4%)  |                         |
| Brain and central nervous system cancer |                                         | 9453 (6780–12580)            | 422·3% (154·6 to 768·9%)     | 23·5 (17–31·2)            | 123·7% (14·7 to 254·7%)   |                         |
| Stroke*                                 |                                         | 520023 (483072–557268)       | 169·6% (159 to 180·7%)       | 1968·8 (1823·4–2122·1)    | -9·6% (-13·3 to -5·4%)    |                         |
| Ischaemic stroke                        |                                         | 414374 (378236–449645)       | 169·7% (158·8 to 182·2%)     | 1656·7 (1500·2–1820)      | -7·6% (-11·8 to -2·6%)    |                         |
| Intracerebral haemorrhage               |                                         | 110425 (101055–120024)       | 164·6% (154·8 to 175·5%)     | 346·5 (316·6–378·4)       | -16% (-19·1 to -12·4%)    |                         |
| Subarachnoid haemorrhage                |                                         | 21047 (16904–24891)          | 141·6% (88·5 to 162%)        | 58·9 (46–70)              | -26·1% (-45·7 to -19·5%)  |                         |
| Neurological disorders†                 |                                         | 13749679 (12424473–15155117) | 174·7% (168·3 to 181·5%)     | 33513·6 (30526·4–36599·7) | 0·2% (-0·6 to 1·1%)       |                         |
| Alzheimer's disease and other dementias |                                         | 118870 (101493–137301)       | 165·6% (156·2 to 176·3%)     | 764·1 (647·4–882)         | 3·8% (0·7 to 7·5%)        |                         |
| Parkinson's disease                     |                                         | 14382 (11802–17136)          | 193·4% (168·2 to 226·9%)     | 74·2 (61·1–87·9)          | 5·1% (-4·3 to 17·1%)      |                         |
| Idiopathic epilepsy                     |                                         | 126929 (33569–217387)        | 125·5% (-39·4 to 851·8%)     | 299·1 (77·8–510·2)        | -3·3% (-74·2 to 300·6%)   |                         |
| Multiple sclerosis                      |                                         | 12797 (10065–16073)          | 274·2% (256·6 to 293·6%)     | 37·8 (30–46·9)            | 19·5% (14·2 to 25·2%)     |                         |
| Migraine                                |                                         | 6522476 (5506459–7700191)    | 179·5% (170·3 to 187·6%)     | 15300·4 (13067–17857·9)   | -0·1% (-0·1 to -0·1%)     |                         |
| Tension-type headache                   |                                         | 9672804 (8160231–11338809)   | 173·9% (163·8 to 183·3%)     | 23667·9 (20363·1–27281·6) | 0% (0 to 0%)              |                         |
| Motor neuron disease                    |                                         | 1025 (822–1264)              | 170·7% (154·7 to 186·6%)     | 2·5 (2·1–3·1)             | 2·6% (-1·2 to 6·4%)       |                         |
| Other neurological disorders            |                                         | 253 (169–354)                | 156·2% (137·6 to 177·1%)     | 0·7 (0·5–1)               | 0% (0 to 0%)              |                         |
| Headache disorders                      |                                         | 13572476 (12216221–14975491) | 175·3% (169·1 to 181·8%)     | 32763·7 (29727·1–35826·9) | 0·2% (-0·3 to 0·7%)       |                         |
| Jordan                                  |                                         | Meningitis                   | 9454 (7810–11615)            | 174·9% (126·3 to 229·7%)  | 86·2 (71·1–105·2)         | -17·7% (-32·3 to -1·2%) |

**Table S12** Burden, mortality, incidence, and prevalence of neurological conditions in North Africa and Middle East countries

| Measure                      | Cause                                   | Location                  | All Ages                  |                           | Age-standardised          |                          |
|------------------------------|-----------------------------------------|---------------------------|---------------------------|---------------------------|---------------------------|--------------------------|
|                              |                                         |                           | Number                    | Percent change            | Rate per 100,000          | Percent change           |
|                              |                                         |                           | 2019                      | From 1990 to 2019         | 2019                      | From 1990 to 2019        |
|                              |                                         | Mean (95% UI)             | Mean (95% UI)             | Mean (95% UI)             | Mean (95% UI)             |                          |
| Kuwait                       | Encephalitis                            |                           | 2852 (2206–3537)          | 194·6% (179 to 209·4%)    | 25·8 (19·8–32·2)          | -14·3% (-19·2 to -9·7%)  |
|                              | Tetanus                                 |                           | 4 (2–7)                   | 71·8% (23·6 to 119%)      | 0 (0–0·1)                 | -40·8% (-55·8 to -26·1%) |
|                              | Brain and central nervous system cancer |                           | 1782 (1268–2270)          | 709·6% (408·1 to 1031·3%) | 15·8 (11·4–20)            | 146·1% (57·1 to 240·4%)  |
|                              | Stroke*                                 |                           | 134580 (123260–145467)    | 258·4% (239·7 to 275%)    | 1793·9 (1621·2–1952·9)    | -23·4% (-27·7 to -19·5%) |
|                              | Ischaemic stroke                        |                           | 113823 (102391–124390)    | 256·8% (238·1 to 273·9%)  | 1591·7 (1411·6–1753·9)    | -23·9% (-28·6 to -19·4%) |
|                              | Intracerebral haemorrhage               |                           | 19651 (17293–22289)       | 218·2% (201·4 to 234·9%)  | 213·9 (189·8–238·7)       | -29·2% (-33·2 to -25%)   |
|                              | Subarachnoid haemorrhage                |                           | 7841 (6569–9273)          | 347·5% (322·3 to 392·6%)  | 74·9 (62·3–88·5)          | -1·1% (-5·6 to 8·6%)     |
|                              | Neurological disorders†                 |                           | 3820339 (3444388–4203289) | 248·2% (237·8 to 259·4%)  | 33366·2 (30403·8–36446·1) | 0·1% (-0·7 to 0·9%)      |
|                              | Alzheimer's disease and other dementias |                           | 31996 (26991–37367)       | 432·9% (411·5 to 453·7%)  | 763·4 (645·9–890)         | 3·8% (-0·1 to 7·8%)      |
|                              | Parkinson's disease                     |                           | 4127 (3383–4884)          | 425·7% (364·4 to 488·4%)  | 77 (63·4–91·5)            | 3% (-11·5 to 16·6%)      |
|                              | Idiopathic epilepsy                     |                           | 35446 (9652–59654)        | 204·5% (-20·6 to 1036·4%) | 302·9 (83·8–498·4)        | 3·5% (-73·1 to 291·1%)   |
|                              | Multiple sclerosis                      |                           | 4613 (3653–5615)          | 345·7% (289·6 to 401·1%)  | 47 (37·9–56·8)            | -1·2% (-13·3 to 10·6%)   |
|                              | Migraine                                |                           | 1789505 (1517280–2114905) | 247·9% (233·8 to 262·4%)  | 15033 (12863·2–17565·4)   | -1% (-1·1 to -0·8%)      |
|                              | Tension-type headache                   |                           | 2700147 (2285860–3158502) | 248·3% (232·6 to 266·5%)  | 23661·5 (20365·4–27259·2) | 0·1% (0 to 0·2%)         |
|                              | Motor neuron disease                    |                           | 308 (248–380)             | 252% (224·4 to 277·9%)    | 2·7 (2·2–3·3)             | 3% (-1·7 to 7·2%)        |
|                              | Other neurological disorders            |                           | 92 (62–128)               | 288·5% (245 to 338·6%)    | 0·9 (0·6–1·2)             | 11·4% (3·6 to 20·5%)     |
|                              | Headache disorders                      |                           | 3770800 (3396204–4150448) | 247·8% (237·5 to 258·9%)  | 32603·8 (29560·1–35676·2) | 0% (-0·6 to 0·5%)        |
|                              | Meningitis                              |                           | 1650 (1360–2032)          | 102·1% (65 to 145·4%)     | 37·6 (31–46·1)            | -25·8% (-39·2 to -9·4%)  |
|                              | Encephalitis                            |                           | 742 (579–916)             | 173·5% (154 to 193·4%)    | 16·1 (12·5–20)            | -3·3% (-10·5 to 4·2%)    |
|                              | Tetanus                                 |                           | 4 (2–6)                   | 136% (117 to 157·4%)      | 0·1 (0–0·1)               | -6·2% (-13·7 to 2·4%)    |
|                              | Brain and central nervous system cancer |                           | 833 (578–1059)            | 417% (212·8 to 610·5%)    | 20·8 (14·7–26·2)          | 120·7% (35·2 to 197·4%)  |
|                              | Stroke*                                 |                           | 42739 (39334–46356)       | 267·6% (248·5 to 287·1%)  | 1230·6 (1134·6–1332·5)    | -5·9% (-10·4 to -1·4%)   |
|                              | Ischaemic stroke                        |                           | 32970 (29762–36320)       | 264·5% (248·5 to 281%)    | 1032·1 (934·4–1132·1)     | -6·5% (-11 to -2·1%)     |
|                              | Intracerebral haemorrhage               |                           | 7685 (6691–8702)          | 239·2% (220·8 to 258%)    | 181·9 (160·3–202·9)       | -5·9% (-11 to -1·2%)     |
|                              | Subarachnoid haemorrhage                |                           | 3852 (3238–4565)          | 281·6% (257·9 to 310·1%)  | 71·5 (59–84·8)            | 2·1% (-3 to 10%)         |
|                              | Neurological disorders†                 |                           | 1592630 (1444629–1756386) | 180·3% (168·3 to 192·5%)  | 33272 (30301·2–36326·1)   | 0·8% (-1·7 to 3·5%)      |
|                              | Alzheimer's disease and other dementias |                           | 14284 (12285–16371)       | 401·3% (382·3 to 422%)    | 798·8 (682·4–922)         | 1·3% (-2·1 to 4·8%)      |
| Parkinson's disease          |                                         | 1581 (1292–1923)          | 315·1% (261·1 to 379·4%)  | 71·4 (59·1–86·1)          | -8·5% (-23·9 to 9·9%)     |                          |
| Idiopathic epilepsy          |                                         | 15171 (4283–24128)        | 119·1% (-37·4 to 718·6%)  | 388·9 (106·7–618·4)       | -4·5% (-73·2 to 267·1%)   |                          |
| Multiple sclerosis           |                                         | 2717 (2228–3296)          | 485·7% (448·8 to 526·8%)  | 53 (43·7–63·5)            | 59·7% (50·5 to 69·9%)     |                          |
| Migraine                     |                                         | 764424 (652804–896685)    | 189·8% (171·5 to 208·5%)  | 14884·8 (12735·9–17378·9) | 3·7% (-0·5 to 7·9%)       |                          |
| Tension-type headache        |                                         | 1117900 (946810–1313413)  | 175·2% (156·1 to 195·5%)  | 23533 (20134·8–26965·1)   | -0·9% (-4·9 to 3%)        |                          |
| Motor neuron disease         |                                         | 152 (121–190)             | 166·7% (143·3 to 192·9%)  | 3·1 (2·6–3·8)             | -4·2% (-9·8 to 1·1%)      |                          |
| Other neurological disorders |                                         | 30 (20–45)                | 197·2% (159·5 to 237·8%)  | 0·7 (0·5–1)               | 2% (-4 to 9·2%)           |                          |
| Headache disorders           |                                         | 1571200 (1423071–1732552) | 179·9% (167·6 to 192·2%)  | 32425·7 (29466·2–35506·5) | 0·8% (-1·8 to 3·3%)       |                          |
| Lebanon                      | Meningitis                              |                           | 2893 (2379–3561)          | 2·5% (-15·3 to 24·6%)     | 55·7 (45·8–68·5)          | -39·8% (-50·5 to -26·9%) |
|                              | Encephalitis                            |                           | 1684 (1292–2085)          | 36·5% (29·2 to 44%)       | 32·1 (24·7–39·8)          | -23·2% (-27·5 to -18·4%) |
|                              | Tetanus                                 |                           | 3 (1–9)                   | -39·7% (-80·8 to 55%)     | 0·1 (0–0·2)               | -72·6% (-90·5 to -27·6%) |
|                              | Brain and central nervous system cancer |                           | 1781 (1230–2343)          | 535·7% (309·1 to 812·8%)  | 34 (23·6–44·8)            | 284·7% (150·6 to 439·7%) |

**Table S12** Burden, mortality, incidence, and prevalence of neurological conditions in North Africa and Middle East countries

| Measure                                 | Cause                                   | Location                  | All Ages                  |                           | Age-standardised          |                          |
|-----------------------------------------|-----------------------------------------|---------------------------|---------------------------|---------------------------|---------------------------|--------------------------|
|                                         |                                         |                           | Number                    | Percent change            | Rate per 100,000          | Percent change           |
|                                         |                                         |                           | 2019                      | From 1990 to 2019         | 2019                      | From 1990 to 2019        |
|                                         |                                         | Mean (95% UI)             | Mean (95% UI)             | Mean (95% UI)             | Mean (95% UI)             |                          |
| Libya                                   | Stroke*                                 |                           | 74841 (69385–80771)       | 124.2% (114.6 to 134.6%)  | 1425.1 (1320.3–1538.1)    | 2.2% (-1.8 to 6.6%)      |
|                                         | Ischaemic stroke                        |                           | 65698 (59943–71554)       | 141.5% (131.1 to 153%)    | 1254 (1145–1367.4)        | 8.4% (4 to 13.1%)        |
|                                         | Intracerebral haemorrhage               |                           | 8994 (8003–9978)          | 51.2% (44.4 to 58%)       | 170.3 (151.9–188.9)       | -25.4% (-29 to -21.9%)   |
|                                         | Subarachnoid haemorrhage                |                           | 3628 (3015–4328)          | 81% (63.8 to 91.7%)       | 67.8 (56.1–80.9)          | -9.6% (-18.9 to -4.4%)   |
|                                         | Neurological disorders†                 |                           | 1765467 (1607119–1930344) | 76.4% (71.6 to 81.4%)     | 33723.8 (30708.5–36796.6) | 0.5% (-0.4 to 1.4%)      |
|                                         | Alzheimer's disease and other dementias |                           | 39913 (34066–46450)       | 221% (204.8 to 235.4%)    | 792.4 (677.6–916.5)       | 4.2% (0.5 to 8.4%)       |
|                                         | Parkinson's disease                     |                           | 4065 (3476–4757)          | 192.1% (157.6 to 228.7%)  | 77.6 (66.5–90.9)          | 9.3% (-3.1 to 23.6%)     |
|                                         | Idiopathic epilepsy                     |                           | 17459 (5094–28152)        | 56.4% (-59.4 to 598.3%)   | 343.8 (99.5–558.2)        | 3.3% (-72.7 to 371.4%)   |
|                                         | Multiple sclerosis                      |                           | 2918 (2372–3504)          | 179.2% (162.9 to 199.5%)  | 53.9 (43.9–64.2)          | 34.7% (27.2 to 43.9%)    |
|                                         | Migraine                                |                           | 819115 (700606–950606)    | 75.4% (68.5 to 81.6%)     | 15516.6 (13250.8–18080.2) | 0.2% (0 to 0.4%)         |
|                                         | Tension-type headache                   |                           | 1237281 (1062030–1432419) | 75.6% (67.8 to 83.6%)     | 23655 (20353.1–27281.3)   | 0.1% (0 to 0.3%)         |
|                                         | Motor neuron disease                    |                           | 148 (121–181)             | 77.2% (65.9 to 87.5%)     | 2.8 (2.3–3.4)             | 2.8% (-1 to 6.9%)        |
|                                         | Other neurological disorders            |                           | 36 (24–50)                | 74.9% (63.2 to 87.3%)     | 0.7 (0.5–1)               | 0.2% (-0.1 to 0.6%)      |
|                                         | Headache disorders                      |                           | 1724497 (1566585–1888655) | 75.3% (70.5 to 80.2%)     | 32916.6 (29885.3–36014.1) | 0.4% (-0.1 to 0.9%)      |
|                                         | Meningitis                              |                           | 3369 (2778–4257)          | 52.6% (23.9 to 86.7%)     | 50.3 (41.7–63.7)          | -14.6% (-31 to 3.9%)     |
|                                         | Encephalitis                            |                           | 1302 (988–1628)           | 151.6% (137.9 to 165.6%)  | 18.8 (14.2–23.5)          | 33.2% (26.1 to 40.4%)    |
|                                         | Tetanus                                 |                           | 2 (1–3)                   | 15.8% (-16.4 to 39.3%)    | 0 (0–0)                   | -26.3% (-48.5 to -11.7%) |
|                                         | Brain and central nervous system cancer |                           | 1010 (727–1362)           | 173.7% (77.5 to 332.5%)   | 15.3 (11–20.2)            | 69.6% (17.6 to 153.3%)   |
|                                         | Stroke*                                 |                           | 90351 (83440–96922)       | 201.2% (186.1 to 214.9%)  | 1588.4 (1461.7–1712.9)    | 14% (8.9 to 18.7%)       |
|                                         | Ischaemic stroke                        |                           | 76359 (69400–82982)       | 223.3% (207.5 to 239%)    | 1395.3 (1262.3–1526.8)    | 23.5% (17.7 to 29.4%)    |
|                                         | Intracerebral haemorrhage               |                           | 13165 (11865–14473)       | 104.8% (97 to 113.1%)     | 202.1 (182.3–222.3)       | -21.3% (-24.3 to -18%)   |
|                                         | Subarachnoid haemorrhage                |                           | 4772 (3877–5658)          | 146.3% (106.5 to 162.2%)  | 63.7 (51.5–75.1)          | -11.4% (-27.1 to -6.2%)  |
|                                         | Neurological disorders†                 |                           | 2417198 (2194984–2643442) | 96.6% (87.7 to 105.5%)    | 33496.5 (30469–36534.7)   | 0.7% (-0.1 to 1.4%)      |
| Alzheimer's disease and other dementias |                                         | 30490 (25757–35237)       | 169.1% (159.2 to 178.8%)  | 755.9 (635.1–874.7)       | -1.1% (-4.6 to 2.6%)      |                          |
| Parkinson's disease                     |                                         | 3830 (3183–4453)          | 213.5% (184.3 to 251.5%)  | 84.1 (69.3–98.3)          | 13.5% (2.3 to 27.9%)      |                          |
| Idiopathic epilepsy                     |                                         | 18517 (6097–29168)        | 25.6% (-59.8 to 364%)     | 287.1 (93.7–450.4)        | -15.5% (-72.8 to 217.9%)  |                          |
| Multiple sclerosis                      |                                         | 2974 (2455–3556)          | 261.2% (240.2 to 282.5%)  | 41.1 (34.2–48.9)          | 31.6% (24.9 to 38.4%)     |                          |
| Migraine                                |                                         | 1150029 (980241–1340837)  | 102.9% (88.9 to 116.4%)   | 15252.6 (13031.9–17806.7) | 1.9% (1.6 to 2.2%)        |                          |
| Tension-type headache                   |                                         | 1698733 (1444446–1978942) | 94.9% (81.4 to 109.5%)    | 23667.9 (20357.9–27281.4) | -0.1% (-0.2 to 0.1%)      |                          |
| Motor neuron disease                    |                                         | 164 (132–204)             | 81.7% (64.2 to 98.3%)     | 2.3 (1.9–2.8)             | -4.9% (-8.6 to -0.9%)     |                          |
| Other neurological disorders            |                                         | 40 (26–57)                | 126.5% (89.7 to 177.6%)   | 0.6 (0.4–0.9)             | 19.1% (6.4 to 36.4%)      |                          |
| Headache disorders                      |                                         | 2382119 (2156062–2608297) | 96.7% (87.5 to 105.6%)    | 32752.8 (29720–35810.4)   | 0.8% (0.3 to 1.3%)        |                          |
| Morocco                                 | Meningitis                              |                           | 24546 (19831–30631)       | -27.1% (-41.4 to -10.6%)  | 69.2 (55.9–86.4)          | -51.8% (-61.5 to -40.5%) |
|                                         | Encephalitis                            |                           | 9842 (7414–12268)         | 43.3% (35.1 to 52.7%)     | 27 (20.3–33.7)            | -10.3% (-15.8 to -4%)    |
|                                         | Tetanus                                 |                           | 132 (85–187)              | -48.9% (-67.7 to -28.2%)  | 0.4 (0.2–0.5)             | -57.8% (-71.1 to -43.8%) |
|                                         | Brain and central nervous system cancer |                           | 1647 (1052–2316)          | 158.2% (39 to 300.6%)     | 4.6 (3–6.5)               | 79.1% (0.8 to 165.4%)    |
|                                         | Stroke*                                 |                           | 557119 (515485–599727)    | 120.3% (110.8 to 131%)    | 1695.1 (1563.4–1833.2)    | 3.4% (-0.7 to 8.2%)      |
|                                         | Ischaemic stroke                        |                           | 476785 (435246–521362)    | 144% (133 to 156.2%)      | 1480.4 (1346.4–1625.7)    | 13.5% (8.4 to 19.4%)     |
|                                         | Intracerebral haemorrhage               |                           | 81150 (73393–90013)       | 46.4% (40.9 to 51.9%)     | 227.7 (205.7–251.9)       | -29% (-31.8 to -26%)     |

**Table S12** Burden, mortality, incidence, and prevalence of neurological conditions in North Africa and Middle East countries

| Measure                                 |                                         | All Ages                     |                           | Age-standardised          |                           |
|-----------------------------------------|-----------------------------------------|------------------------------|---------------------------|---------------------------|---------------------------|
|                                         |                                         | Number                       | Percent change            | Rate per 100,000          | Percent change            |
| Cause                                   | Location                                | 2019                         | From 1990 to 2019         | 2019                      | From 1990 to 2019         |
|                                         |                                         | Mean (95% UI)                | Mean (95% UI)             | Mean (95% UI)             | Mean (95% UI)             |
| Palestine                               | Subarachnoid haemorrhage                | 24641 (20517–29395)          | 58·4% (35·6 to 68·5%)     | 66·1 (55·6–78·6)          | -22·9% (-34·4 to -17·4%)  |
|                                         | Neurological disorders†                 | 12336972 (11206895–13482839) | 58·5% (53·8 to 63%)       | 33537 (30530·4–36612·6)   | 0·2% (-0·6 to 1%)         |
|                                         | Alzheimer's disease and other dementias | 174576 (147734–202323)       | 145% (135·7 to 155%)      | 761·7 (643·9–884·8)       | 0·5% (-2·9 to 4·3%)       |
|                                         | Parkinson's disease                     | 20470 (17155–23848)          | 179·5% (147·3 to 219·8%)  | 73·7 (61·9–85·8)          | 20·7% (6·3 to 39%)        |
|                                         | Idiopathic epilepsy                     | 103282 (24771–182256)        | 55·2% (-62·8 to 593%)     | 295·3 (70·8–519·2)        | 16·6% (-72·4 to 416·5%)   |
|                                         | Multiple sclerosis                      | 15001 (12205–18295)          | 151·6% (136·6 to 168·2%)  | 40·9 (33·3–49·7)          | 26·4% (19·3 to 34·6%)     |
|                                         | Migraine                                | 5801216 (4955330–6762318)    | 57·5% (50·8 to 63·8%)     | 15400·4 (13149·2–17963·3) | -0·3% (-0·4 to -0·3%)     |
|                                         | Tension-type headache                   | 8691626 (7444134–10049060)   | 58·2% (51·7 to 65·2%)     | 23654·8 (20352·1–27282·8) | 0% (-0·1 to 0%)           |
|                                         | Motor neuron disease                    | 863 (701–1067)               | 62·3% (51·4 to 73·3%)     | 2·4 (1·9–2·9)             | 4% (0 to 8%)              |
|                                         | Other neurological disorders            | 242 (161–343)                | 63% (48·7 to 78·5%)       | 0·7 (0·5–1)               | 0% (-0·1 to 0·1%)         |
|                                         | Headache disorders                      | 12136822 (10998942–13271258) | 57·9% (53·2 to 62·5%)     | 32787·8 (29774–35877·7)   | 0·1% (-0·4 to 0·6%)       |
|                                         | Meningitis                              | 3238 (2656–4044)             | 32·6% (8·9 to 60·5%)      | 71·5 (58·7–88·5)          | -47·2% (-56·9 to -35·8%)  |
|                                         | Encephalitis                            | 1535 (1189–1893)             | 153·8% (139·4 to 169%)    | 33·9 (25·9–42·1)          | -4·8% (-10·5 to 1%)       |
|                                         | Tetanus                                 | 2 (1–3)                      | -7% (-58·9 to 44·8%)      | 0 (0–0·1)                 | -52·6% (-74·1 to -36·1%)  |
|                                         | Brain and central nervous system cancer | 1143 (885–1498)              | 280·7% (122 to 456·2%)    | 25 (18·9–31·3)            | 60·2% (2·7 to 120·3%)     |
|                                         | Stroke*                                 | 41305 (37846–45067)          | 167·1% (153·9 to 180·9%)  | 1510·8 (1381·5–1666·5)    | -3·7% (-8·5 to 1·4%)      |
|                                         | Ischaemic stroke                        | 35217 (31813–38979)          | 168·2% (155·5 to 180·7%)  | 1341·8 (1205·3–1496·6)    | -0·6% (-5·9 to 4·6%)      |
|                                         | Intracerebral haemorrhage               | 6105 (5301–7123)             | 137·1% (123·4 to 153%)    | 176·6 (155·3–203·6)       | -21·6% (-26·1 to -16·1%)  |
|                                         | Subarachnoid haemorrhage                | 2509 (2061–2972)             | 207·6% (193·3 to 224·2%)  | 65·6 (54·2–77·7)          | -4·3% (-9 to 0·6%)        |
|                                         | Oman                                    | Neurological disorders†      | 1555737 (1395251–1715093) | 172·9% (167·6 to 178·5%)  | 33527·9 (30565·1–36597·7) |
| Alzheimer's disease and other dementias |                                         | 12043 (10286–13959)          | 135·9% (126·9 to 144·7%)  | 771·8 (652·9–891)         | 2·1% (-1·8 to 5·8%)       |
| Parkinson's disease                     |                                         | 1517 (1259–1792)             | 158·4% (129·8 to 188·4%)  | 78·3 (65·2–92·4)          | 2·1% (-8·8 to 14·4%)      |
| Idiopathic epilepsy                     |                                         | 15155 (4009–25681)           | 137·7% (-41·1 to 1001·8%) | 301·3 (78·4–510·7)        | 2·2% (-74·3 to 374·9%)    |
| Multiple sclerosis                      |                                         | 1498 (1205–1827)             | 268% (252·9 to 286·8%)    | 41·5 (33·6–50·2)          | 18·5% (13·9 to 24·3%)     |
| Migraine                                |                                         | 736087 (619212–875301)       | 176·4% (169·4 to 183%)    | 15338·5 (13096·5–17900)   | -1·2% (-1·4 to -0·9%)     |
| Tension-type headache                   |                                         | 1094411 (920963–1287920)     | 172·3% (164·6 to 180·4%)  | 23661·8 (20360·3–27277·7) | 0% (-0·2 to 0·1%)         |
| Motor neuron disease                    |                                         | 120 (95–150)                 | 175·2% (158·3 to 189·6%)  | 2·6 (2·1–3·2)             | 4% (0 to 7·7%)            |
| Other neurological disorders            |                                         | 29 (19–40)                   | 154% (137·8 to 173·2%)    | 0·7 (0·5–1)               | -0·5% (-1 to -0·1%)       |
| Headache disorders                      |                                         | 1535980 (1377994–1696993)    | 173·5% (168·3 to 178·6%)  | 32770·6 (29756·4–35868·7) | -0·1% (-0·7 to 0·4%)      |
| Meningitis                              |                                         | 735 (580–945)                | 55·8% (26·2 to 90·2%)     | 17·1 (13·6–21·7)          | -38·1% (-50·1 to -23·9%)  |
| Encephalitis                            |                                         | 1233 (960–1509)              | 115·7% (99·9 to 131·1%)   | 28·9 (22·3–35·6)          | -18·2% (-24·5 to -11·5%)  |
| Tetanus                                 |                                         | 1 (1–2)                      | 44·3% (-13·4 to 94·5%)    | 0 (0–0)                   | -50·9% (-79·9 to -20·2%)  |
| Brain and central nervous system cancer |                                         | 673 (380–900)                | 754·3% (329·7 to 1289·4%) | 15·7 (9·1–20·4)           | 255·2% (76·4 to 453·4%)   |
| Stroke*                                 | 37722 (34606–41220)                     | 167·7% (154·3 to 182%)       | 1525·6 (1399·9–1686·6)    | -8·5% (-12·4 to -4·5%)    |                           |
| Ischaemic stroke                        | 29829 (26974–32984)                     | 176·1% (164 to 190%)         | 1327·2 (1192·6–1493·3)    | -2·9% (-7·6 to 1·9%)      |                           |
| Intracerebral haemorrhage               | 7278 (6350–8298)                        | 123·3% (111·7 to 136·7%)     | 215·3 (191·2–240·9)       | -30·2% (-33·6 to -26·2%)  |                           |
| Subarachnoid haemorrhage                | 2619 (2167–3072)                        | 179·6% (153·1 to 197·5%)     | 58 (48·9–68·6)            | -18·9% (-29·7 to -13·9%)  |                           |
| Neurological disorders†                 | 1575176 (1414954–1754275)               | 180·2% (168·3 to 193%)       | 32834·2 (29837·3–35871·3) | 0·1% (-0·9 to 1%)         |                           |

**Table S12** Burden, mortality, incidence, and prevalence of neurological conditions in North Africa and Middle East countries

| Measure                                 |                                         | All Ages                                |                            | Age-standardised          |                          |                      |
|-----------------------------------------|-----------------------------------------|-----------------------------------------|----------------------------|---------------------------|--------------------------|----------------------|
|                                         |                                         | Number                                  | Percent change             | Rate per 100,000          | Percent change           |                      |
| Cause                                   | Location                                | 2019                                    | From 1990 to 2019          | 2019                      | From 1990 to 2019        |                      |
|                                         |                                         | Mean (95% UI)                           | Mean (95% UI)              | Mean (95% UI)             | Mean (95% UI)            |                      |
| Qatar                                   | Alzheimer's disease and other dementias | 6746 (5733–7781)                        | 143·4% (135·2 to 153·2%)   | 789·5 (668·6–913·6)       | 1·1% (-2·4 to 4·6%)      |                      |
|                                         | Parkinson's disease                     | 1362 (1125–1661)                        | 213·3% (180·9 to 249%)     | 112·5 (92·9–135·2)        | 28% (14 to 44·8%)        |                      |
|                                         | Idiopathic epilepsy                     | 14018 (4253–22808)                      | 153% (-24·4 to 892·3%)     | 339·1 (106·3–548·8)       | 20·3% (-65·1 to 372·1%)  |                      |
|                                         | Multiple sclerosis                      | 1483 (1206–1835)                        | 352·9% (326·2 to 381·2%)   | 34·3 (28·3–41)            | 33·8% (27·2 to 41·9%)    |                      |
|                                         | Migraine                                | 721298 (607176–849217)                  | 182·6% (166·6 to 197·2%)   | 14081·2 (12028–16515·9)   | -1·5% (-1·8 to -1·2%)    |                      |
|                                         | Tension-type headache                   | 1138730 (948472–1361335)                | 181·2% (161·5 to 199·9%)   | 23692·5 (20423·5–27194·2) | -0·1% (-0·3 to 0%)       |                      |
|                                         | Motor neuron disease                    | 116 (91–145)                            | 182·6% (159·7 to 207·3%)   | 2·3 (1·9–2·8)             | 2·7% (-1·3 to 6·9%)      |                      |
|                                         | Other neurological disorders            | 27 (18–39)                              | 153·2% (121·5 to 186·7%)   | 0·7 (0·5–0·9)             | -0·2% (-0·5 to 0·1%)     |                      |
|                                         | Headache disorders                      | 1559952 (1397888–1741248)               | 180·6% (168·5 to 193·2%)   | 32016·9 (29024·5–35062·5) | -0·1% (-0·8 to 0·5%)     |                      |
|                                         | Meningitis                              | 2554 (2108–3120)                        | 421·2% (327·5 to 527·1%)   | 89 (73·1–108·5)           | -26·2% (-39·7 to -10·5%) |                      |
|                                         | Encephalitis                            | 382 (297–476)                           | 521·9% (468·5 to 576%)     | 13 (10–16·2)              | -10·8% (-18·7 to -2·6%)  |                      |
|                                         | Tetanus                                 | 1 (0–1)                                 | 454·9% (372·5 to 504·4%)   | 0 (0–0·1)                 | -11·4% (-30·2 to -2·7%)  |                      |
|                                         | Brain and central nervous system cancer | 586 (374–975)                           | 2220% (1205·8 to 3531·3%)  | 24·3 (17–36·4)            | 230·5% (93·2 to 395%)    |                      |
|                                         | Stroke*                                 | 22335 (20296–24525)                     | 568·9% (532·5 to 607·4%)   | 1226·3 (1127·4–1327·2)    | -22·2% (-25·6 to -18·9%) |                      |
|                                         | Ischaemic stroke                        | 15886 (14141–17914)                     | 593·8% (566·3 to 621·8%)   | 1000·1 (908·5–1098·6)     | -20·9% (-24·8 to -17·5%) |                      |
|                                         | Intracerebral haemorrhage               | 5075 (4419–5756)                        | 492·5% (460·9 to 527·5%)   | 209·1 (184·9–232·2)       | -28·6% (-32·2 to -24·8%) |                      |
|                                         | Subarachnoid haemorrhage                | 2422 (1952–2857)                        | 577% (448·3 to 625·5%)     | 73·6 (57·6–87·5)          | -17·4% (-38·8 to -11·6%) |                      |
|                                         | Neurological disorders†                 | 1029865 (924870–1150192)                | 608·8% (592 to 626%)       | 32245·1 (29313·4–35220·7) | -0·7% (-1·7 to 0·3%)     |                      |
|                                         | Saudi Arabia                            | Alzheimer's disease and other dementias | 2696 (2251–3172)           | 685·6% (629·8 to 752·1%)  | 779·2 (654·8–905·3)      | 3·9% (0·1 to 8·2%)   |
|                                         |                                         | Parkinson's disease                     | 750 (594–951)              | 811·6% (709·6 to 914·7%)  | 119·3 (98·3–142·9)       | 20·2% (6·9 to 36·3%) |
| Idiopathic epilepsy                     |                                         | 9532 (3056–15453)                       | 484·5% (71·8 to 2028·4%)   | 397·3 (130·2–630·9)       | -1·7% (-71 to 262·2%)    |                      |
| Multiple sclerosis                      |                                         | 1784 (1551–2001)                        | 1183·7% (988·2 to 1408·8%) | 56·1 (49·2–62·9)          | 54·1% (34 to 77·5%)      |                      |
| Migraine                                |                                         | 457439 (385311–540225)                  | 596·8% (576 to 614·3%)     | 13295·3 (11309·2–15700·9) | -2·7% (-3·3 to -2·2%)    |                      |
| Tension-type headache                   |                                         | 756418 (622260–910774)                  | 614·6% (587·5 to 637·7%)   | 23538·3 (20220·1–27033·6) | -0·5% (-0·9 to -0·2%)    |                      |
| Motor neuron disease                    |                                         | 93 (73–119)                             | 631·5% (587·1 to 678·9%)   | 2·8 (2·3–3·5)             | 4·2% (-0·3 to 8·7%)      |                      |
| Other neurological disorders            |                                         | 18 (12–26)                              | 591·6% (536·1 to 640·5%)   | 0·7 (0·5–0·9)             | 0·3% (-0·3 to 1%)        |                      |
| Headache disorders                      |                                         | 1020526 (913853–1140900)                | 609·4% (592·3 to 625·7%)   | 31367·7 (28394·9–34336·2) | -0·8% (-1·5 to -0·2%)    |                      |
| Meningitis                              |                                         | 10756 (8555–13346)                      | 81·2% (46·1 to 117·4%)     | 31·2 (25–38·3)            | -29·1% (-43·3 to -14·4%) |                      |
| Encephalitis                            |                                         | 6242 (4833–7806)                        | 146·9% (128·5 to 165%)     | 17·2 (13·2–21·7)          | -7·3% (-14·1 to -0·2%)   |                      |
| Tetanus                                 |                                         | 17 (9–28)                               | -39·1% (-76·9 to 7%)       | 0 (0–0·1)                 | -71·4% (-87·9 to -51%)   |                      |
| Brain and central nervous system cancer |                                         | 6790 (4813–10153)                       | 1355·6% (660·2 to 2697·9%) | 17·9 (13·1–26·5)          | 444·1% (181·8 to 910·9%) |                      |
| Stroke*                                 |                                         | 480500 (442193–523176)                  | 238·8% (214·5 to 262·7%)   | 1967·7 (1818·1–2143·5)    | 7·9% (-0·1 to 15·2%)     |                      |
| Ischaemic stroke                        |                                         | 321122 (290893–356283)                  | 249·5% (214·9 to 281·5%)   | 1504·9 (1360·8–1680·6)    | 13·5% (1·9 to 23·8%)     |                      |
| Intracerebral haemorrhage               |                                         | 153819 (128262–183295)                  | 202·7% (182·9 to 223%)     | 493·7 (421·2–576·3)       | -5·3% (-10·8 to 0%)      |                      |
| Subarachnoid haemorrhage                |                                         | 23492 (19521–27716)                     | 252·7% (233·5 to 271·3%)   | 58·5 (48·5–69·5)          | -3·1% (-9·2 to 1%)       |                      |
| Neurological disorders†                 |                                         | 12255833 (11107362–13550299)            | 166·8% (153·5 to 180·3%)   | 31719·5 (28912–34577·5)   | -1% (-3·6 to 1·9%)       |                      |
| Alzheimer's disease and other dementias |                                         | 67805 (58042–77811)                     | 133·2% (122·1 to 147%)     | 770·3 (648·2–891·9)       | 0·8% (-2·6 to 5·3%)      |                      |
| Parkinson's disease                     |                                         | 13291 (11019–15910)                     | 233·9% (195·1 to 279·3%)   | 107·6 (90·4–127·8)        | 27·7% (13·1 to 45%)      |                      |
| Idiopathic epilepsy                     | 187641 (56191–294049)                   | 209·3% (-14·6 to 1107·1%)               | 563·3 (162·9–883·2)        | 41·8% (-60·1 to 462·6%)   |                          |                      |



**Table S12** Burden, mortality, incidence, and prevalence of neurological conditions in North Africa and Middle East countries

|                                         |                                         | All Ages                     |                           | Age-standardised          |                          |
|-----------------------------------------|-----------------------------------------|------------------------------|---------------------------|---------------------------|--------------------------|
| Measure                                 | Location                                | Number                       | Percent change            | Rate per 100,000          | Percent change           |
|                                         |                                         | 2019                         | From 1990 to 2019         | 2019                      | From 1990 to 2019        |
| Cause                                   |                                         | Mean (95% UI)                | Mean (95% UI)             | Mean (95% UI)             | Mean (95% UI)            |
| Syrian Arab Republic                    | Multiple sclerosis                      | 10757 (8342–13614)           | 364·9% (340 to 389·3%)    | 28·4 (22·4–35·2)          | 29·7% (23·9 to 35·9%)    |
|                                         | Migraine                                | 5954561 (5057344–6988764)    | 173·9% (151·3 to 195·1%)  | 14325·3 (12266·3–16709·6) | -1·3% (-5·2 to 2·8%)     |
|                                         | Tension-type headache                   | 8354742 (7033634–9767868)    | 162·3% (142·1 to 182·5%)  | 21757·9 (18684·4–24972·1) | -2·7% (-7 to 2%)         |
|                                         | Motor neuron disease                    | 927 (738–1158)               | 166·9% (141·5 to 192·2%)  | 2·4 (2–2·9)               | 2·9% (-0·9 to 6·8%)      |
|                                         | Other neurological disorders            | 227 (150–330)                | 153·9% (116·9 to 194·2%)  | 0·7 (0·5–1)               | 0·3% (0·1 to 0·4%)       |
|                                         | Headache disorders                      | 12076851 (10926929–13362048) | 166·6% (153·2 to 180%)    | 30759·7 (27871·4–33712·7) | -1·5% (-4 to 1·2%)       |
|                                         | Meningitis                              | 11671 (9722–14373)           | -31·5% (-44·6 to -16·5%)  | 82·1 (68·7–101)           | -45% (-55·3 to -32·4%)   |
|                                         | Encephalitis                            | 4573 (3488–5719)             | 17·4% (9·8 to 25·1%)      | 31·5 (23·9–39·6)          | -12·7% (-18·7 to -6·8%)  |
|                                         | Tetanus                                 | 9 (5–13)                     | -73·6% (-84·1 to -61·8%)  | 0·1 (0–0·1)               | -72·3% (-81·1 to -63·1%) |
|                                         | Brain and central nervous system cancer | 2461 (1818–3349)             | 166·4% (57·3 to 321·2%)   | 17·5 (12·8–23·6)          | 109·7% (38·8 to 216·7%)  |
|                                         | Stroke*                                 | 199599 (184381–215112)       | 78·9% (71·6 to 86·2%)     | 1518·7 (1403·8–1637·5)    | -13·9% (-17·3 to -10·5%) |
|                                         | Ischaemic stroke                        | 156735 (142891–171185)       | 94% (86·3 to 102%)        | 1224·1 (1107·6–1338·3)    | -8·4% (-12·3 to -4·5%)   |
|                                         | Intracerebral haemorrhage               | 42182 (38241–46305)          | 34·9% (29·2 to 42·7%)     | 298·5 (270·2–327·4)       | -30·1% (-33·2 to -26·4%) |
|                                         | Subarachnoid haemorrhage                | 9383 (7415–11295)            | 61·6% (28·4 to 73·6%)     | 63·1 (50·8–74·9)          | -15·5% (-32·3 to -9·8%)  |
|                                         | Neurological disorders†                 | 4994027 (4532771–5479405)    | 37·4% (32·5 to 42·4%)     | 33730·3 (30733·5–36791·7) | 1·1% (0·2 to 1·9%)       |
|                                         | Alzheimer's disease and other dementias | 63678 (53661–73950)          | 117·3% (106·6 to 128·4%)  | 770·3 (653·1–892·3)       | 2·3% (-1·7 to 6·3%)      |
|                                         | Parkinson's disease                     | 8349 (6932–9929)             | 160·5% (132·4 to 191·7%)  | 81·6 (67·8–97)            | 11·6% (-1·3 to 26·8%)    |
|                                         | Idiopathic epilepsy                     | 39099 (11405–66196)          | 18·9% (-68·8 to 447·1%)   | 269·8 (79·6–454·1)        | 13·8% (-70·2 to 417·4%)  |
|                                         | Multiple sclerosis                      | 5899 (4683–7200)             | 130·5% (117·5 to 143·2%)  | 42·1 (33·4–51·5)          | 23·8% (18·6 to 28·4%)    |
|                                         | Tunisia                                 | Migraine                     | 2353979 (2000112–2775087) | 38·7% (31·9 to 46·1%)     | 15691 (13390·1–18304·1)  |
| Tension-type headache                   |                                         | 3507816 (2996722–4066438)    | 36·6% (28·8 to 44·8%)     | 23640·6 (20306·7–27263·7) | 0% (-0·3 to 0·3%)        |
| Motor neuron disease                    |                                         | 367 (297–452)                | 28·3% (17·7 to 41·1%)     | 2·5 (2·1–3·1)             | 0·4% (-3·4 to 4·6%)      |
| Other neurological disorders            |                                         | 98 (65–136)                  | 36·5% (18·7 to 57·6%)     | 0·7 (0·5–1)               | -0·1% (-0·4 to 0·3%)     |
| Headache disorders                      |                                         | 4919044 (4454649–5399577)    | 37·1% (32 to 42·2%)       | 32983·9 (29977·1–36072·6) | 1% (0·4 to 1·5%)         |
| Meningitis                              |                                         | 7524 (6184–9135)             | 5·1% (-14·9 to 28·5%)     | 63·4 (52–76·9)            | -31·3% (-44·6 to -16·1%) |
| Encephalitis                            |                                         | 3109 (2368–3846)             | 41·2% (33·7 to 49·1%)     | 25·6 (19·5–31·7)          | -11·4% (-16·1 to -6·4%)  |
| Tetanus                                 |                                         | 3 (2–5)                      | -13·1% (-43·5 to 11·7%)   | 0 (0–0)                   | -35·6% (-57·7 to -18·4%) |
| Brain and central nervous system cancer |                                         | 932 (602–1310)               | 239·2% (90·3 to 430·9%)   | 8·1 (5·2–11·4)            | 157·8% (49 to 292·8%)    |
| Stroke*                                 |                                         | 159928 (147442–173396)       | 184·9% (171 to 200·3%)    | 1260·8 (1162·6–1366)      | 22·1% (16·3 to 28·2%)    |
| Ischaemic stroke                        |                                         | 141938 (129035–155655)       | 191·6% (178·5 to 206·8%)  | 1130·1 (1028·1–1240·4)    | 25·6% (20·1 to 31·5%)    |
| Intracerebral haemorrhage               |                                         | 16645 (14281–18819)          | 118·3% (97·6 to 140%)     | 128·2 (110–144·9)         | 2% (-6·9 to 12·1%)       |
| Subarachnoid haemorrhage                |                                         | 8671 (7021–10281)            | 119% (70·2 to 145·7%)     | 65·2 (53·3–76·9)          | 3·7% (-19 to 15·8%)      |
| Neurological disorders†                 |                                         | 4068566 (3719308–4444144)    | 55·6% (49·5 to 61·5%)     | 33620·3 (30668–36658·7)   | 0·5% (-0·2 to 1·3%)      |
| Alzheimer's disease and other dementias |                                         | 84642 (72004–97973)          | 215·4% (200·5 to 231·5%)  | 791·8 (670·4–916)         | 2·1% (-1·3 to 5·5%)      |
| Parkinson's disease                     |                                         | 9312 (7834–10877)            | 208·5% (170·6 to 249·5%)  | 79·6 (66·9–93·2)          | 15·1% (1·8 to 30·4%)     |
| Idiopathic epilepsy                     |                                         | 31108 (8948–50416)           | 47·6% (-64 to 534·6%)     | 279·7 (79·6–456·8)        | 16·3% (-72·2 to 395·8%)  |
| Multiple sclerosis                      |                                         | 6567 (5389–7931)             | 170·3% (156·3 to 186·2%)  | 49·7 (40·8–59·8)          | 28·4% (22·4 to 34·2%)    |
| Migraine                                |                                         | 1889805 (1626638–2191245)    | 54% (45·3 to 62·5%)       | 15455 (13195·2–18014·9)   | 0·4% (0·4 to 0·5%)       |

**Table S12** Burden, mortality, incidence, and prevalence of neurological conditions in North Africa and Middle East countries

| Measure               |                                         | All Ages                     |                           | Age-standardised          |                          |
|-----------------------|-----------------------------------------|------------------------------|---------------------------|---------------------------|--------------------------|
|                       |                                         | Number                       | Percent change            | Rate per 100,000          | Percent change           |
| Cause                 | Location                                | 2019                         | From 1990 to 2019         | 2019                      | From 1990 to 2019        |
|                       |                                         | Mean (95% UI)                | Mean (95% UI)             | Mean (95% UI)             | Mean (95% UI)            |
| Türkiye               | Tension-type headache                   | 2863725 (2464872–3296804)    | 55% (45·8 to 64·3%)       | 23657·2 (20350·7–27289)   | 0·1% (0 to 0·1%)         |
|                       | Motor neuron disease                    | 332 (269–408)                | 61·1% (48·2 to 75·5%)     | 2·7 (2·2–3·3)             | 4·1% (-0·5 to 8·1%)      |
|                       | Other neurological disorders            | 83 (55–116)                  | 64·4% (46·9 to 83%)       | 0·7 (0·5–1)               | 0% (-0·2 to 0·1%)        |
|                       | Headache disorders                      | 3985492 (3630553–4359580)    | 54·5% (48·3 to 60·4%)     | 32857·4 (29808·3–35970·3) | 0·4% (-0·1 to 0·9%)      |
|                       | Meningitis                              | 12559 (10364–15525)          | -53·5% (-63 to -42·9%)    | 14·9 (12·3–18·4)          | -69% (-75·3 to -62%)     |
|                       | Encephalitis                            | 23653 (18209–29257)          | 39·7% (31·6 to 48%)       | 27·2 (21–33·5)            | -12·3% (-17·9 to -6·4%)  |
|                       | Tetanus                                 | 43 (23–75)                   | -58·7% (-76·1 to -34·5%)  | 0·1 (0–0·1)               | -74·2% (-86·2 to -54·7%) |
|                       | Brain and central nervous system cancer | 23091 (11335–32329)          | 279·2% (97·5 to 516%)     | 29 (14·5–40)              | 173·1% (53 to 322·7%)    |
|                       | Stroke*                                 | 1080379 (1002616–1164932)    | 103·3% (94·4 to 112·7%)   | 1213·6 (1124·7–1309·4)    | -8·7% (-12·4 to -4·6%)   |
|                       | Ischaemic stroke                        | 838412 (764091–920762)       | 114·7% (104·8 to 124·9%)  | 956·3 (872·9–1049·7)      | -5·2% (-9·5 to -0·7%)    |
|                       | Intracerebral haemorrhage               | 212849 (190914–233873)       | 73·1% (65·5 to 81·5%)     | 234·6 (210·6–257·5)       | -15·9% (-19·7 to -11·7%) |
|                       | Subarachnoid haemorrhage                | 74005 (62671–86497)          | 63·7% (55·6 to 73·9%)     | 78·4 (66·2–91·3)          | -19·2% (-23·3 to -14·1%) |
|                       | Neurological disorders†                 | 28053956 (25592370–30582393) | 57·3% (50·3 to 63·9%)     | 31966·2 (29201·8–34866·9) | 1% (-1·6 to 3·6%)        |
|                       | Alzheimer's disease and other dementias | 643123 (550258–741760)       | 198·7% (188·4 to 208·2%)  | 805·1 (686·6–926·2)       | 4·7% (1 to 8·1%)         |
|                       | Parkinson's disease                     | 72458 (59364–86774)          | 225% (194·8 to 259·1%)    | 86·9 (71–104·1)           | 22·3% (10·9 to 35·5%)    |
|                       | Idiopathic epilepsy                     | 373568 (110799–580823)       | 57·9% (-53·3 to 564·8%)   | 476 (143·4–741·4)         | 23·8% (-62·6 to 422·5%)  |
|                       | Multiple sclerosis                      | 45814 (43903–47892)          | 110·2% (105·2 to 115·9%)  | 48·7 (46·7–50·9)          | 2·5% (0·1 to 5%)         |
| Migraine              | 13296101 (11425706–15392415)            | 55·1% (45·5 to 65·2%)        | 14888·4 (12817·8–17240·8) | 0% (-4·1 to 4·2%)         |                          |
| United Arab Emirates  | Tension-type headache                   | 19035787 (16409964–21823161) | 57·2% (45·8 to 67·8%)     | 21726·3 (18745·7–24838·8) | 1% (-2·9 to 5·2%)        |
|                       | Motor neuron disease                    | 3163 (2637–3746)             | 77·2% (64·6 to 89·4%)     | 3·6 (3–4·2)               | 10·2% (6·2 to 14·5%)     |
|                       | Other neurological disorders            | 623 (416–872)                | 62·4% (44·5 to 81%)       | 0·7 (0·5–1)               | 0·8% (-5 to 7·6%)        |
|                       | Headache disorders                      | 27316884 (24809006–29912076) | 56·1% (49·3 to 62·8%)     | 31032·8 (28267·3–33987·3) | 0·7% (-1·8 to 3·4%)      |
|                       | Meningitis                              | 3196 (2562–3961)             | 333·9% (251·6 to 421·7%)  | 38·3 (31·2–47·4)          | -21% (-36·2 to -5%)      |
|                       | Encephalitis                            | 1528 (1169–1905)             | 596·8% (542·3 to 656·7%)  | 15·3 (11·6–19·2)          | 23·9% (13·7 to 35·1%)    |
|                       | Tetanus                                 | 6 (4–9)                      | 59% (-27 to 218·5%)       | 0·2 (0·1–0·3)             | -82·6% (-92·8 to -36·4%) |
|                       | Brain and central nervous system cancer | 1511 (860–2264)              | 820·1% (481·5 to 1255·4%) | 16·2 (9·5–22·6)           | 60·9% (-6·8 to 134·6%)   |
|                       | Stroke*                                 | 136808 (125534–148340)       | 721·6% (675·3 to 767·1%)  | 2225·7 (2037·3–2436·3)    | -7·5% (-11·6 to -3·6%)   |
|                       | Ischaemic stroke                        | 108862 (98572–119869)        | 779·7% (733·4 to 827·4%)  | 2005·1 (1808·4–2238·2)    | -3·3% (-7·9 to 1·1%)     |
|                       | Intracerebral haemorrhage               | 24981 (22321–28054)          | 509·4% (482·8 to 536·8%)  | 282·6 (253·7–312·3)       | -30·3% (-33·4 to -27·3%) |
|                       | Subarachnoid haemorrhage                | 8045 (6737–9531)             | 644·4% (588·5 to 698·8%)  | 58 (49–68·4)              | -15·4% (-23·2 to -10·8%) |
|                       | Neurological disorders†                 | 3418888 (3055926–3814303)    | 475·3% (441·9 to 508·3%)  | 32631·3 (29615·7–35673·5) | -0·1% (-1·3 to 1%)       |
|                       | Alzheimer's disease and other dementias | 8095 (6634–9647)             | 636·5% (579·7 to 696·4%)  | 721·3 (602·2–842·2)       | -0·1% (-3·5 to 3·2%)     |
|                       | Parkinson's disease                     | 3131 (2506–3880)             | 901% (789·1 to 1022·1%)   | 116 (97·6–138·8)          | 11·8% (0·6 to 23·6%)     |
|                       | Idiopathic epilepsy                     | 38016 (11150–60612)          | 306·1% (16 to 1404·2%)    | 491·9 (143–776·3)         | -13·1% (-74·9 to 216·9%) |
|                       | Multiple sclerosis                      | 3103 (2586–3694)             | 709·6% (610·3 to 804·1%)  | 23·8 (20·5–27·5)          | -0·9% (-9·2 to 7·7%)     |
| Migraine              | 1521822 (1290266–1798697)               | 466·6% (428·2 to 509·6%)     | 13693·4 (11674·5–16104·4) | -0·7% (-1·1 to -0·3%)     |                          |
| Tension-type headache | 2512643 (2048289–3008501)               | 483·1% (427 to 537·9%)       | 23676 (20386·9–27204·5)   | -0·2% (-0·5 to 0%)        |                          |
| Motor neuron disease  | 297 (229–384)                           | 472·2% (400 to 543·2%)       | 2·7 (2·2–3·2)             | -0·5% (-4·4 to 4·5%)      |                          |



**Table S12** Burden, mortality, incidence, and prevalence of neurological conditions in North Africa and Middle East countries

|                                         |                                         | All Ages                    |                            | Age-standardised          |                           |
|-----------------------------------------|-----------------------------------------|-----------------------------|----------------------------|---------------------------|---------------------------|
| Measure                                 | Location                                | Number                      | Percent change             | Rate per 100,000          | Percent change            |
|                                         |                                         | 2019                        | From 1990 to 2019          | 2019                      | From 1990 to 2019         |
| Cause                                   |                                         | Mean (95% UI)               | Mean (95% UI)              | Mean (95% UI)             | Mean (95% UI)             |
| Yemen                                   | Other neurological disorders            | 63 (39–97)                  | 496.2% (395.1 to 607%)     | 0.7 (0.5–0.9)             | -0.1% (-0.6 to 0.4%)      |
|                                         | Headache disorders                      | 3386525 (3025434–3793999)   | 477.2% (443.3 to 509%)     | 31755.5 (28744.2–34841.8) | 0% (-0.6 to 0.6%)         |
|                                         | Meningitis                              | 23455 (18740–29582)         | 71.4% (33.2 to 115.3%)     | 84.5 (67.6–106.3)         | -29.7% (-45.4 to -11.7%)  |
|                                         | Encephalitis                            | 9044 (6746–11507)           | 175.4% (154.6 to 195.5%)   | 32.5 (23.6–41.7)          | 9.1% (0.5 to 17.5%)       |
|                                         | Tetanus                                 | 43 (27–64)                  | -21.7% (-65.9 to 29.9%)    | 0.1 (0.1–0.2)             | -58.7% (-79.3 to -40.8%)  |
|                                         | Brain and central nervous system cancer | 1936 (1105–2806)            | 210% (60 to 521.8%)        | 6.8 (4.1–9.9)             | 47.8% (-18.6 to 161.2%)   |
|                                         | Stroke*                                 | 260915 (242029–280821)      | 174.8% (161.2 to 188.1%)   | 1609.4 (1480.2–1745.5)    | 0.8% (-4.2 to 5.7%)       |
|                                         | Ischaemic stroke                        | 210911 (192387–230501)      | 215.7% (201.3 to 229.9%)   | 1355.2 (1220.3–1492.9)    | 15.9% (9.8 to 21.5%)      |
|                                         | Intracerebral haemorrhage               | 51230 (46578–56482)         | 82.4% (74.1 to 92.2%)      | 260 (236.1–286)           | -37% (-39.8 to -33.6%)    |
|                                         | Subarachnoid haemorrhage                | 15013 (12661–17634)         | 138.3% (125.8 to 151.7%)   | 68.9 (58.1–81.4)          | -17.6% (-21.9 to -12.6%)  |
|                                         | Neurological disorders†                 | 9573564 (8555001–10612384)  | 163.6% (158.4 to 168.8%)   | 33439.2 (30457.6–36527.8) | 0.1% (-0.6 to 0.9%)       |
|                                         | Alzheimer's disease and other dementias | 64757 (54820–74749)         | 190.8% (179.6 to 203%)     | 752.3 (639.3–869.6)       | -2.7% (-6 to 1.1%)        |
|                                         | Parkinson's disease                     | 7214 (5874–8683)            | 205.1% (175.4 to 242%)     | 63.6 (51.9–76.4)          | 9.7% (-1.8 to 24.7%)      |
|                                         | Idiopathic epilepsy                     | 72874 (17982–135412)        | 113.8% (-55.2 to 1082%)    | 220.1 (53.2–403.6)        | -3.3% (-79.5 to 439.8%)   |
|                                         | Multiple sclerosis                      | 5042 (4003–6214)            | 253.5% (235.8 to 271.5%)   | 23.3 (18.6–28.4)          | 22.9% (16.8 to 29.2%)     |
|                                         | Migraine                                | 4554030 (3811556–5444867)   | 168.1% (161.7 to 173.9%)   | 15398.5 (13147.1–17961.2) | 0% (-0.1 to 0.1%)         |
|                                         | Tension-type headache                   | 6749015 (5678757–8023953)   | 162.7% (155.4 to 169.6%)   | 23663 (20359.2–27287.1)   | 0% (-0.1 to 0.1%)         |
|                                         | Motor neuron disease                    | 470 (372–588)               | 153.1% (137.6 to 168.2%)   | 1.6 (1.3–2)               | -0.8% (-4.5 to 3.2%)      |
|                                         | Other neurological disorders            | 180 (120–252)               | 140.3% (125.8 to 156.2%)   | 0.7 (0.5–1)               | 0.3% (0 to 0.5%)          |
|                                         | Afghanistan                             | Headache disorders          | 9474680 (8476336–10502588) | 163.9% (159.2 to 168.7%)  | 32765.4 (29726.4–35887.4) |
| Meningitis                              |                                         | 56549 (46438–68857)         | 71.4% (34.9 to 114.7%)     | 217.1 (178.4–261.1)       | -41% (-53.6 to -26.1%)    |
| Encephalitis                            |                                         | 19845 (14553–25342)         | 232.3% (204.9 to 263.8%)   | 69.4 (48.6–89.3)          | 4.4% (-4.1 to 13.2%)      |
| Tetanus                                 |                                         | 229 (161–311)               | -14% (-47.3 to 48.1%)      | 0.6 (0.4–0.8)             | -67.3% (-77.7 to -51.9%)  |
| Brain and central nervous system cancer |                                         | 2524 (1341–4399)            | 183% (72 to 445.1%)        | 7.6 (4.3–13.6)            | 2.9% (-33 to 74.3%)       |
| Stroke*                                 |                                         | 281177 (260881–302740)      | 130.1% (117.5 to 141.2%)   | 1657.6 (1533.4–1779.5)    | 3.8% (-1.2 to 8%)         |
| Ischaemic stroke                        |                                         | 208005 (188770–227010)      | 148.9% (135 to 162.7%)     | 1309.1 (1187.6–1435.3)    | 18.2% (12.4 to 23.2%)     |
| Intracerebral haemorrhage               |                                         | 74850 (67151–82123)         | 90.7% (79.7 to 103%)       | 355.1 (316.2–392)         | -27% (-30.2 to -23.5%)    |
| Subarachnoid haemorrhage                |                                         | 16373 (13652–19482)         | 170.2% (152.7 to 189.5%)   | 66.9 (56.4–79.3)          | -10.6% (-14.9 to -6.4%)   |
| Neurological disorders†                 |                                         | 10980202 (9799203–12197339) | 234.7% (227.3 to 241.4%)   | 33401.5 (30465.4–36481)   | -0.4% (-1.3 to 0.4%)      |
| Alzheimer's disease and other dementias |                                         | 54772 (45887–63556)         | 54.1% (47.3 to 60.4%)      | 735.4 (616.4–852.4)       | -1.6% (-5.3 to 2.4%)      |
| Parkinson's disease                     |                                         | 7352 (6145–8807)            | 61.8% (44.4 to 82.4%)      | 69.3 (58.2–82.4)          | -3.3% (-12.9 to 8%)       |
| Idiopathic epilepsy                     |                                         | 93796 (16679–183102)        | 204.7% (-33.9 to 1912.6%)  | 234.4 (41.5–453.3)        | -9.9% (-80.5 to 489.9%)   |
| Multiple sclerosis                      |                                         | 9996 (8248–12114)           | 259.8% (239.6 to 281.6%)   | 43.1 (36–51.2)            | 19.9% (13.6 to 25.7%)     |
| Migraine                                |                                         | 5201896 (4319114–6245247)   | 240.2% (231.8 to 247.4%)   | 15315.6 (13076.7–17870.6) | -2.3% (-2.7 to -1.8%)     |
| Tension-type headache                   |                                         | 7750880 (6436495–9231384)   | 234.6% (222.8 to 246.5%)   | 23693.8 (20386.8–27306.9) | 0.4% (0.1 to 0.7%)        |
| Motor neuron disease                    |                                         | 652 (521–815)               | 238.4% (219.8 to 260%)     | 1.9 (1.6–2.4)             | 0.2% (-4 to 4.2%)         |
| Other neurological disorders            |                                         | 210 (139–295)               | 207.4% (183.1 to 228.1%)   | 0.7 (0.5–1)               | -0.3% (-0.8 to 0.2%)      |
| Headache disorders                      |                                         | 10870791 (9667151–12101396) | 236.4% (229.2 to 243%)     | 32717.2 (29722.6–35827.7) | -0.4% (-0.9 to 0.2%)      |

**Table S12** Burden, mortality, incidence, and prevalence of neurological conditions in North Africa and Middle East countries

| Measure                                   |                                         | All Ages                      |                           | Age-standardised          |                          |
|-------------------------------------------|-----------------------------------------|-------------------------------|---------------------------|---------------------------|--------------------------|
|                                           |                                         | Number                        | Percent change            | Rate per 100,000          | Percent change           |
|                                           |                                         | 2019                          | From 1990 to 2019         | 2019                      | From 1990 to 2019        |
| Cause                                     | Location                                | Mean (95% UI)                 | Mean (95% UI)             | Mean (95% UI)             | Mean (95% UI)            |
| Sudan                                     | Meningitis                              | 16303 (13100–20405)           | -55.8% (-64.7 to -43.9%)  | 44.1 (35.4–54.9)          | -79% (-83.3 to -73.3%)   |
|                                           | Encephalitis                            | 10509 (7968–13256)            | 88.7% (75 to 106%)        | 28.9 (21.5–36.5)          | -12.4% (-18.8 to -4.3%)  |
|                                           | Tetanus                                 | 43 (27–65)                    | -41.6% (-69.4 to -8.5%)   | 0.1 (0.1–0.2)             | -65.6% (-79.8 to -52.8%) |
|                                           | Brain and central nervous system cancer | 3651 (2077–5305)              | 166.2% (16.8 to 550.4%)   | 9.1 (5.4–13.2)            | 47% (-25.8 to 197.7%)    |
|                                           | Stroke*                                 | 398038 (367084–427930)        | 124.6% (114.5 to 134.3%)  | 1785.8 (1645.2–1936.9)    | 8.2% (3.7 to 12.8%)      |
|                                           | Ischaemic stroke                        | 325721 (297455–355521)        | 153.9% (143.4 to 165%)    | 1520.7 (1375.6–1681.8)    | 23.8% (18.5 to 29.5%)    |
|                                           | Intracerebral haemorrhage               | 74732 (67854–82225)           | 54.2% (47 to 62.2%)       | 279.6 (253.9–307.1)       | -31.9% (-34.9 to -28.8%) |
|                                           | Subarachnoid haemorrhage                | 20074 (16980–23622)           | 87.1% (77.4 to 98.7%)     | 67.6 (57.5–79.7)          | -19.5% (-23.9 to -14.5%) |
|                                           | Neurological disorders†                 | 12655355 (11340532–13986720)  | 119.4% (116.7 to 122.3%)  | 33434.1 (30397.1–36506.1) | 0.1% (-0.7 to 0.9%)      |
|                                           | Alzheimer's disease and other dementias | 100531 (85731–115957)         | 111.9% (101.4 to 122%)    | 746.2 (630.2–861.7)       | 0.2% (-3.3 to 3.8%)      |
|                                           | Parkinson's disease                     | 11401 (9527–13651)            | 102.4% (78.9 to 129.8%)   | 69.7 (58.3–83.4)          | 2.1% (-9.9 to 16.1%)     |
|                                           | Idiopathic epilepsy                     | 104147 (25345–187318)         | 110.9% (-49.8 to 1029.8%) | 245.5 (60.3–444.7)        | 8.5% (-73.9 to 482%)     |
|                                           | Multiple sclerosis                      | 6715 (5309–8260)              | 180% (166.4 to 195%)      | 23.1 (18.5–27.9)          | 23.9% (18.2 to 30.7%)    |
|                                           | Migraine                                | 6032231 (5066737–7200217)     | 121.7% (118.9 to 124.1%)  | 15412 (13164.6–17974.7)   | -0.2% (-0.3 to -0.1%)    |
|                                           | Tension-type headache                   | 8893989 (7481341–10475764)    | 118.3% (115.4 to 121.4%)  | 23598.8 (20291–27242.1)   | -0.1% (-0.2 to -0.1%)    |
|                                           | Motor neuron disease                    | 637 (502–799)                 | 123.4% (113.4 to 134.2%)  | 1.7 (1.4–2.1)             | 4.1% (0.4 to 8.2%)       |
| Other neurological disorders              | 236 (158–328)                           | 106.7% (99.4 to 114.7%)       | 0.7 (0.5–1)               | 0% (-0.1 to 0.2%)         |                          |
| Headache disorders                        | 12508726 (11209326–13860164)            | 119.5% (117.3 to 122%)        | 32741.2 (29701.9–35840.2) | 0.1% (-0.5 to 0.6%)       |                          |
| <b>YLDs (Years Lived with Disability)</b> |                                         |                               |                           |                           |                          |
| Global                                    | Meningitis                              | 683333 (480874–924320)        | -19.2% (-22.5 to -15.4%)  | 9 (6.3–12.2)              | -41.2% (-43.6 to -38.4%) |
|                                           | Encephalitis                            | 482436 (343282–647343)        | 5.2% (0.7 to 9.8%)        | 6.1 (4.4–8.3)             | -28.8% (-31.6 to -25.6%) |
|                                           | Tetanus                                 | 1745 (1022–2663)              | -76.5% (-81.8 to -71%)    | 0 (0–0)                   | -81.7% (-85.3 to -77.9%) |
|                                           | Brain and central nervous system cancer | 129402 (83870–174962)         | 118.1% (34.2 to 156.9%)   | 1.6 (1.1–2.2)             | 29.5% (-18.9 to 52%)     |
|                                           | Stroke*                                 | 17741742 (12759419–22587415)  | 88.9% (85.3 to 92.7%)     | 218.1 (156.7–277)         | -4.7% (-6.1 to -3.3%)    |
|                                           | Ischaemic stroke                        | 13128534 (9349917–16930382)   | 102% (97.4 to 106.9%)     | 162.3 (115.8–209.9)       | 0.1% (-1.8 to 2%)        |
|                                           | Intracerebral haemorrhage               | 3266283 (2333985–4173735)     | 57.2% (54.9 to 59.5%)     | 39.4 (28.1–50.2)          | -17.7% (-19.2 to -16.1%) |
|                                           | Subarachnoid haemorrhage                | 1346925 (964157–1782242)      | 65.4% (60.7 to 69.6%)     | 16.4 (11.7–21.6)          | -12.9% (-15.2 to -11.2%) |
|                                           | Neurological disorders†                 | 65625969 (28649298–122710043) | 64.9% (58.3 to 81.4%)     | 831.3 (365.8–1542.4)      | 2.9% (-0.7 to 6.8%)      |
|                                           | Alzheimer's disease and other dementias | 7417069 (5226780–9927706)     | 164.7% (158.7 to 171%)    | 98.9 (69.5–132.6)         | 5.5% (4 to 6.8%)         |
|                                           | Parkinson's disease                     | 1210093 (841166–1640683)      | 154.7% (149.4 to 160.9%)  | 15.1 (10.4–20.3)          | 16.2% (13.5 to 19%)      |
|                                           | Idiopathic epilepsy                     | 7740804 (4810323–11216664)    | 43.7% (18.7 to 76.3%)     | 101.1 (63.1–146.8)        | 1.4% (-15.4 to 23.2%)    |
|                                           | Multiple sclerosis                      | 451204 (320712–591541)        | 71.3% (65.3 to 77.1%)     | 5.5 (3.9–7.1)             | -5.8% (-8.6 to -2.9%)    |
|                                           | Migraine                                | 42077666 (6418383–95645211)   | 56.6% (52.6 to 62.1%)     | 525.5 (78.8–1194)         | 1.5% (-4.4 to 3.3%)      |
|                                           | Tension-type headache                   | 4541689 (1395546–14981336)    | 57.8% (45.1 to 65.9%)     | 56.2 (17–188.5)           | -2.5% (-5.4 to 1.1%)     |
|                                           | Motor neuron disease                    | 57068 (39982–76338)           | 68.8% (62.4 to 75.6%)     | 0.7 (0.5–1)               | 1.9% (0.6 to 3.3%)       |
| Other neurological disorders              | 2130376 (1392089–3016404)               | 93.3% (65.4 to 128.5%)        | 28.3 (18.4–40.4)          | 40.6% (20.9 to 64.7%)     |                          |

**Table S12** Burden, mortality, incidence, and prevalence of neurological conditions in North Africa and Middle East countries

| Measure                                 |                                         | All Ages                     |                          | Age-standardised        |                          |
|-----------------------------------------|-----------------------------------------|------------------------------|--------------------------|-------------------------|--------------------------|
|                                         |                                         | Number                       | Percent change           | Rate per 100,000        | Percent change           |
| Cause                                   | Location                                | 2019                         | From 1990 to 2019        | 2019                    | From 1990 to 2019        |
|                                         |                                         | Mean (95% UI)                | Mean (95% UI)            | Mean (95% UI)           | Mean (95% UI)            |
| North Africa and Middle East            | Headache disorders                      | 46619355 (9772903–100161726) | 56·7% (52·4 to 62·1%)    | 581·8 (119·6–1255·6)    | 1·1% (-4·2 to 2·9%)      |
|                                         | Meningitis                              | 36232 (25118–48690)          | 17·1% (9·2 to 26·8%)     | 6 (4·2–8)               | -34·6% (-39 to -29·4%)   |
|                                         | Encephalitis                            | 19799 (13819–26804)          | 84·9% (76·6 to 93·9%)    | 3·2 (2·2–4·3)           | -4·1% (-8·1 to 0·4%)     |
|                                         | Tetanus                                 | 27 (15–42)                   | -70·2% (-81·9 to -50·5%) | 0 (0–0)                 | -80·9% (-87·4 to -70·7%) |
|                                         | Brain and central nervous system cancer | 10647 (6244–14986)           | 203·1% (78·6 to 311·3%)  | 1·9 (1·1–2·7)           | 55·6% (-2·6 to 105·3%)   |
|                                         | Stroke*                                 | 1113741 (812092–1400797)     | 140·2% (135·3 to 145·3%) | 239·4 (176·1–301·4)     | -0·7% (-2·6 to 1·2%)     |
|                                         | Ischaemic stroke                        | 877321 (639827–1114121)      | 157·6% (151·5 to 164·4%) | 195·6 (144·4–249·1)     | 5·2% (2·8 to 7·6%)       |
|                                         | Intracerebral haemorrhage               | 182217 (129142–229566)       | 88·9% (82·6 to 95·8%)    | 34·4 (24·4–43·5)        | -21·5% (-24·2 to -18·4%) |
|                                         | Subarachnoid haemorrhage                | 54203 (37875–72271)          | 103·1% (83·8 to 116·5%)  | 9·3 (6·6–12·4)          | -17·9% (-26·2 to -12·2%) |
|                                         | Neurological disorders†                 | 5447847 (2227535–10439230)   | 99·6% (83·8 to 121·6%)   | 935 (419·6–1737·7)      | 0·2% (-6·5 to 8·3%)      |
|                                         | Alzheimer's disease and other dementias | 352185 (248064–474309)       | 187·7% (180 to 195·6%)   | 112·8 (79·1–151·9)      | 2·8% (0·9 to 4·6%)       |
|                                         | Parkinson's disease                     | 44505 (30653–60492)          | 197·3% (182·1 to 214·4%) | 11·7 (8–15·7)           | 14·8% (9·2 to 21·2%)     |
|                                         | Idiopathic epilepsy                     | 603114 (342286–938664)       | 47·5% (-1 to 119%)       | 101 (57·3–156·5)        | -9·3% (-39·8 to 33·8%)   |
|                                         | Multiple sclerosis                      | 57687 (40798–76752)          | 169·3% (156·5 to 183·1%) | 10 (7·1–13·3)           | 10·9% (6·1 to 16·3%)     |
|                                         | Migraine                                | 3793207 (645291–8665809)     | 102·1% (93·2 to 125·1%)  | 601·4 (107–1371·8)      | 0% (-1·6 to 1·6%)        |
|                                         | Tension-type headache                   | 416595 (138258–1196825)      | 115·5% (84·9 to 132·3%)  | 68·1 (22·8–195·5)       | 1% (-9·5 to 8·7%)        |
|                                         | Motor neuron disease                    | 3308 (2269–4604)             | 103·3% (92·1 to 113·8%)  | 0·5 (0·4–0·8)           | 3·6% (2 to 5·1%)         |
|                                         | Other neurological disorders            | 177246 (106129–265092)       | 98·6% (41·9 to 177·9%)   | 29·4 (18–43·9)          | 25·5% (-8·9 to 71%)      |
|                                         | Algeria                                 | Headache disorders           | 4209802 (990143–9068319) | 103·3% (94·5 to 123·7%) | 669·6 (159·1–1431·3)     |
| Meningitis                              |                                         | 2230 (1544–3012)             | 32·6% (17·8 to 48%)      | 5·4 (3·7–7·3)           | -20·4% (-29·4 to -11·2%) |
| Encephalitis                            |                                         | 1151 (800–1568)              | 94·5% (76·8 to 113·5%)   | 2·7 (1·9–3·7)           | 8·6% (-1·1 to 18·5%)     |
| Tetanus                                 |                                         | 0 (0–1)                      | -46·5% (-76·6 to -2·4%)  | 0 (0–0)                 | -65·9% (-84·6 to -41·1%) |
| Brain and central nervous system cancer |                                         | 363 (193–552)                | 183·7% (52·9 to 298·7%)  | 0·9 (0·5–1·4)           | 59% (-14·1 to 120·7%)    |
| Stroke*                                 |                                         | 85024 (62206–107505)         | 128·1% (116·1 to 140·6%) | 242·8 (178·6–307·3)     | -10·6% (-14·9 to -6%)    |
| Ischaemic stroke                        |                                         | 69844 (50800–89336)          | 151·1% (135·5 to 167·4%) | 204·2 (149·2–261·1)     | -3·1% (-8·5 to 2·6%)     |
| Intracerebral haemorrhage               |                                         | 11224 (7842–14388)           | 50·3% (35·3 to 65·8%)    | 29·2 (20·5–37·5)        | -39·8% (-45·5 to -34%)   |
| Subarachnoid haemorrhage                |                                         | 3955 (2721–5400)             | 98·4% (53·6 to 135·2%)   | 9·5 (6·5–13)            | -23·7% (-41·8 to -9·3%)  |
| Neurological disorders†                 |                                         | 374247 (157441–723907)       | 84·9% (44 to 148%)       | 928·2 (416·8–1744·2)    | -2·3% (-20 to 19·5%)     |
| Alzheimer's disease and other dementias |                                         | 27351 (19435–36980)          | 244·1% (216·3 to 275·2%) | 113·1 (79·6–152·1)      | 1% (-3·2 to 5·2%)        |
| Parkinson's disease                     |                                         | 3441 (2387–4723)             | 213·3% (165·9 to 268·6%) | 11·4 (7·9–15·5)         | 9·2% (-6·4 to 25·7%)     |
| Idiopathic epilepsy                     |                                         | 38664 (8737–80014)           | 15·9% (-75·9 to 408·9%)  | 94·6 (21·2–196·2)       | -22·9% (-83·9 to 237%)   |
| Multiple sclerosis                      |                                         | 4546 (3054–6303)             | 218·1% (167·6 to 278%)   | 10·8 (7·3–14·9)         | 25·3% (6·4 to 48·3%)     |
| Migraine                                |                                         | 259963 (44334–590017)        | 89% (76·7 to 120·2%)     | 602·5 (103·9–1372·1)    | -0·2% (-3·2 to 3·1%)     |
| Tension-type headache                   |                                         | 28460 (9650–79524)           | 106·7% (73·1 to 140·3%)  | 66·7 (22·6–189)         | 0·3% (-10·2 to 7·9%)     |
| Motor neuron disease                    |                                         | 212 (145–296)                | 89·9% (74·6 to 104·9%)   | 0·5 (0·3–0·7)           | 2% (-1·6 to 5·7%)        |
| Other neurological disorders            |                                         | 11609 (3995–22111)           | 61·2% (-48·7 to 478·3%)  | 28·6 (10·1–54·1)        | 12·4% (-63 to 244%)      |
| Bahrain                                 |                                         | Headache disorders           | 288424 (67480–615898)    | 90·7% (78·3 to 119·7%)  | 669·2 (155·7–1442·3)     |
|                                         | Meningitis                              | 58 (40–80)                   | 69·2% (45·3 to 101·3%)   | 3·9 (2·7–5·4)           | -44·7% (-51·7 to -35·7%) |
|                                         | Encephalitis                            | 30 (21–42)                   | 187·6% (156·4 to 223·9%) | 1·9 (1·3–2·6)           | -7·3% (-17 to 4·6%)      |
|                                         | Tetanus                                 | 0 (0–0)                      | 136·8% (87 to 169·8%)    | 0 (0–0)                 | -11·7% (-35·5 to 0%)     |
|                                         | Brain and central nervous system cancer | 21 (11–31)                   | 510·4% (260·3 to 799·8%) | 1·5 (0·9–2·2)           | 50·6% (-10·4 to 121·5%)  |
|                                         | Stroke*                                 | 2076 (1491–2641)             | 275·8% (251·4 to 302·4%) | 173·8 (126–219·2)       | -25·9% (-30 to -21·8%)   |

**Table S12** Burden, mortality, incidence, and prevalence of neurological conditions in North Africa and Middle East countries

| Measure                                 | Cause                                   | Location                | All Ages                 |                          | Age-standardised         |                          |
|-----------------------------------------|-----------------------------------------|-------------------------|--------------------------|--------------------------|--------------------------|--------------------------|
|                                         |                                         |                         | Number                   | Percent change           | Rate per 100,000         | Percent change           |
|                                         |                                         |                         | 2019                     | From 1990 to 2019        | 2019                     | From 1990 to 2019        |
|                                         |                                         | Mean (95% UI)           | Mean (95% UI)            | Mean (95% UI)            | Mean (95% UI)            |                          |
| Egypt                                   | Ischaemic stroke                        |                         | 1541 (1097–1972)         | 287.4% (256.8 to 320.9%) | 139.9 (101.5–178.9)      | -25.5% (-30.1 to -20.7%) |
|                                         | Intracerebral haemorrhage               |                         | 387 (268–510)            | 217.3% (175 to 264.1%)   | 26.2 (18.1–34)           | -32.1% (-39.1 to -24.6%) |
|                                         | Subarachnoid haemorrhage                |                         | 148 (100–202)            | 353.6% (288.7 to 432.3%) | 7.7 (5.2–10.4)           | -7.2% (-19.9 to 7.6%)    |
|                                         | Neurological disorders†                 |                         | 13285 (5189–25427)       | 204.4% (128.4 to 304.6%) | 923.6 (424.3–1686.2)     | -4.4% (-29 to 24.2%)     |
|                                         | Alzheimer's disease and other dementias |                         | 492 (346–665)            | 440% (403.7 to 480.9%)   | 113.7 (80.5–151.6)       | 2.9% (-1 to 7.3%)        |
|                                         | Parkinson's disease                     |                         | 99 (64–142)              | 494.3% (387.6 to 617.3%) | 13 (8.8–17.7)            | 11.2% (-7.8 to 34.3%)    |
|                                         | Idiopathic epilepsy                     |                         | 1549 (373–3291)          | 93.9% (-54.7 to 821.7%)  | 125.4 (29.5–263.3)       | -27.4% (-82.5 to 245.2%) |
|                                         | Multiple sclerosis                      |                         | 154 (101–218)            | 464.7% (361.2 to 595.2%) | 8.4 (5.5–11.6)           | 25.3% (6.2 to 47.9%)     |
|                                         | Migraine                                |                         | 9458 (1762–21196)        | 219.3% (197 to 279.3%)   | 564.5 (100.5–1278.1)     | -0.7% (-3.9 to 2.8%)     |
|                                         | Tension-type headache                   |                         | 1117 (386–3084)          | 254.2% (197.7 to 330.7%) | 64.6 (21.3–189.3)        | -0.3% (-10.7 to 7.7%)    |
|                                         | Motor neuron disease                    |                         | 10 (7–14)                | 235.2% (197.8 to 274.8%) | 0.6 (0.4–0.8)            | 3.7% (-0.5 to 7.9%)      |
|                                         | Other neurological disorders            |                         | 405 (139–807)            | 168.8% (-11.7 to 924.4%) | 33.5 (10.8–66.6)         | 8.3% (-65.7 to 260.8%)   |
|                                         | Headache disorders                      |                         | 10575 (2641–22348)       | 222.7% (200.3 to 275.9%) | 629 (149.4–1360.3)       | -0.6% (-3.9 to 2.8%)     |
|                                         | Meningitis                              |                         | 6334 (4295–8627)         | 24.3% (7.7 to 42.2%)     | 6.3 (4.3–8.6)            | -29.9% (-39 to -20.2%)   |
|                                         | Encephalitis                            |                         | 3213 (2215–4397)         | 62.8% (49 to 78.3%)      | 3.2 (2.2–4.4)            | -13.2% (-20.2 to -5.3%)  |
|                                         | Tetanus                                 |                         | 4 (2–8)                  | -65.9% (-81.4 to -38.2%) | 0 (0–0)                  | -79.4% (-88 to -61.9%)   |
|                                         | Brain and central nervous system cancer |                         | 1037 (634–1565)          | 164.1% (48 to 286.3%)    | 1.2 (0.7–1.8)            | 39.2% (-12.6 to 102%)    |
|                                         | Stroke*                                 |                         | 193859 (141703–245188)   | 149.5% (136.2 to 163%)   | 282.6 (206.4–356.5)      | 18% (11.8 to 24.2%)      |
|                                         | Ischaemic stroke                        |                         | 158984 (115787–203081)   | 179.1% (161.3 to 197.2%) | 239.8 (175.1–307.5)      | 30% (22.2 to 37.9%)      |
|                                         | Intracerebral haemorrhage               |                         | 27020 (19059–34612)      | 68.2% (50.9 to 86.9%)    | 33.8 (24.2–43.2)         | -22.2% (-29.7 to -14%)   |
| Subarachnoid haemorrhage                |                                         | 7856 (5370–10558)       | 68.8% (40 to 96.8%)      | 9 (6.1–12.1)             | -21.3% (-34.6 to -8.4%)  |                          |
| Neurological disorders†                 |                                         | 851984 (300357–1665555) | 94.8% (48.2 to 146.5%)   | 931.2 (371.4–1745.9)     | 2% (-16.8 to 23.4%)      |                          |
| Alzheimer's disease and other dementias |                                         | 41201 (29329–55508)     | 119.1% (108.5 to 130%)   | 110 (76.8–148.3)         | 4.8% (0.4 to 9.7%)       |                          |
| Parkinson's disease                     |                                         | 6366 (4279–8932)        | 147.6% (106.3 to 196.4%) | 12 (8.2–16.5)            | 16.5% (-1.6 to 37.1%)    |                          |
| Idiopathic epilepsy                     |                                         | 87277 (21019–178024)    | 54.2% (-65.2 to 647.7%)  | 86.5 (20.9–177.8)        | -9.2% (-79.5 to 337.3%)  |                          |
| Multiple sclerosis                      |                                         | 4792 (3178–6761)        | 160.1% (121.2 to 202.7%) | 5.5 (3.7–7.8)            | 22.6% (4.4 to 43.5%)     |                          |
| Migraine                                |                                         | 619621 (96677–1426392)  | 98.2% (84.3 to 113.8%)   | 621.1 (104–1420.2)       | 1.9% (-5.1 to 9.1%)      |                          |
| Tension-type headache                   |                                         | 65173 (20989–196744)    | 100.8% (75 to 120.6%)    | 69.1 (22.6–207.8)        | 1.4% (-10.1 to 10.8%)    |                          |
| Motor neuron disease                    |                                         | 454 (308–632)           | 96.4% (87.1 to 105.5%)   | 0.5 (0.3–0.7)            | 4.2% (0.6 to 8.2%)       |                          |
| Other neurological disorders            |                                         | 27101 (8400–51840)      | 120.5% (-34.1 to 711%)   | 26.4 (9.5–48.8)          | 30.6% (-56.7 to 292.5%)  |                          |
| Headache disorders                      |                                         | 684794 (147091–1491960) | 98.4% (84.9 to 112.8%)   | 690.3 (156.4–1488.7)     | 1.9% (-4.8 to 8.6%)      |                          |
| Meningitis                              |                                         | 5917 (4098–7913)        | 4.6% (-5.1 to 15.9%)     | 7 (4.9–9.3)              | -28.1% (-34 to -21.5%)   |                          |
| Encephalitis                            |                                         | 2444 (1678–3343)        | 47.4% (37.4 to 57.9%)    | 2.8 (1.9–3.8)            | -8.6% (-14.1 to -3.1%)   |                          |
| Tetanus                                 |                                         | 1 (0–1)                 | -79% (-90 to -59.4%)     | 0 (0–0)                  | -82.7% (-90.7 to -70.6%) |                          |
| Brain and central nervous system cancer |                                         | 2379 (1087–3523)        | 174% (49.3 to 259.1%)    | 2.9 (1.3–4.3)            | 62.6% (-5.7 to 104.8%)   |                          |
| Stroke*                                 |                                         | 148037 (106315–188599)  | 125.2% (116.8 to 134%)   | 196.4 (140.3–251.9)      | -12.7% (-15.5 to -10%)   |                          |
| Ischaemic stroke                        |                                         | 124907 (88889–160270)   | 130% (120.3 to 141.2%)   | 169.1 (121.1–219.4)      | -12.7% (-15.8 to -9.5%)  |                          |
| Intracerebral haemorrhage               |                                         | 16457 (11518–21066)     | 93% (84 to 102.4%)       | 19.9 (14.1–25.6)         | -15.1% (-19.1 to -10.9%) |                          |
| Subarachnoid haemorrhage                |                                         | 6673 (4684–9048)        | 129.1% (116.4 to 142.7%) | 7.3 (5.2–9.9)            | -6.6% (-10.8 to -2.3%)   |                          |
| Neurological disorders†                 |                                         | 833316 (360833–1572932) | 76.6% (61.6 to 100%)     | 975.8 (451.6–1800)       | -0.6% (-6.7 to 6.2%)     |                          |
| Alzheimer's disease and other dementias |                                         | 67291 (47273–90622)     | 325.9% (297.8 to 357.1%) | 113.9 (80–154)           | 2.2% (0 to 4%)           |                          |
| Parkinson's disease                     |                                         | 8067 (5467–11099)       | 255.1% (228.5 to 282.5%) | 12 (8.1–16.6)            | 13.2% (8.7 to 17.3%)     |                          |
| Idiopathic epilepsy                     |                                         | 79851 (45748–122172)    | 5.9% (-27.2 to 51.5%)    | 100 (57.2–152.2)         | -14.4% (-41.4 to 21.7%)  |                          |

**Table S12** Burden, mortality, incidence, and prevalence of neurological conditions in North Africa and Middle East countries

| Measure | Cause  | Location                                | All Ages                                |                          | Age-standardised        |                          |                          |
|---------|--------|-----------------------------------------|-----------------------------------------|--------------------------|-------------------------|--------------------------|--------------------------|
|         |        |                                         | Number                                  | Percent change           | Rate per 100,000        | Percent change           |                          |
|         |        |                                         | 2019                                    | From 1990 to 2019        | 2019                    | From 1990 to 2019        |                          |
|         |        | Mean (95% UI)                           | Mean (95% UI)                           | Mean (95% UI)            | Mean (95% UI)           |                          |                          |
| Iraq    |        | Multiple sclerosis                      | 11971 (8380–15879)                      | 133.3% (117.5 to 150.8%) | 13 (9.1–17.2)           | -4.8% (-10.5 to 1.6%)    |                          |
|         |        | Migraine                                | 571655 (107029–1282201)                 | 77.6% (63.7 to 117.4%)   | 628.3 (115.2–1411.2)    | -0.3% (-3.6 to 4.1%)     |                          |
|         |        | Tension-type headache                   | 70182 (23015–207136)                    | 103.8% (70.9 to 131.5%)  | 77.6 (24.9–236.4)       | 5.2% (-5.7 to 15.9%)     |                          |
|         |        | Motor neuron disease                    | 541 (370–758)                           | 86.9% (70.6 to 103.5%)   | 0.6 (0.4–0.9)           | 6.6% (4.9 to 8.4%)       |                          |
|         |        | Other neurological disorders            | 23759 (14285–35287)                     | 40.7% (3.5 to 90.8%)     | 30.4 (18.3–45.5)        | 19.7% (-12.2 to 57.7%)   |                          |
|         |        | Headache disorders                      | 641837 (160733–1355804)                 | 80.2% (66.5 to 117.2%)   | 705.8 (173.2–1503.1)    | 0.3% (-3.3 to 5.8%)      |                          |
|         |        | Meningitis                              | 2459 (1672–3320)                        | 67.1% (49.1 to 87.9%)    | 5.8 (4–7.8)             | -30.1% (-37.7 to -21.7%) |                          |
|         |        | Encephalitis                            | 1335 (933–1813)                         | 149.5% (130.6 to 169.4%) | 3.2 (2.2–4.3)           | -4.5% (-11.4 to 2.7%)    |                          |
|         |        | Tetanus                                 | 1 (1–2)                                 | -64.2% (-85.1 to -12.2%) | 0 (0–0)                 | -78.7% (-89.9 to -58.3%) |                          |
|         |        | Brain and central nervous system cancer | 1033 (636–1504)                         | 318.3% (111.4 to 590.4%) | 2.9 (1.8–4.2)           | 64.4% (-13.6 to 160.6%)  |                          |
|         |        | Stroke*                                 | 78443 (56662–98553)                     | 167% (154.2 to 181.1%)   | 306.4 (223.5–385.2)     | -8.7% (-13.3 to -3.7%)   |                          |
|         |        | Ischaemic stroke                        | 60290 (43323–76438)                     | 169.8% (154.6 to 186.7%) | 249.5 (181.9–315.5)     | -6.3% (-11.5 to -0.1%)   |                          |
|         |        | Intracerebral haemorrhage               | 15125 (10610–19282)                     | 161.7% (136.8 to 188.3%) | 48.4 (34.2–61.7)        | -16.2% (-23.4 to -8.3%)  |                          |
|         |        | Subarachnoid haemorrhage                | 3028 (2077–4156)                        | 141.8% (92.3 to 183.1%)  | 8.6 (5.9–11.8)          | -25.3% (-44.6 to -11.8%) |                          |
|         |        | Neurological disorders†                 | 353613 (132455–707045)                  | 168.9% (104.9 to 239.6%) | 913 (394.4–1730.9)      | -0.1% (-18.2 to 20.6%)   |                          |
|         |        | Alzheimer's disease and other dementias | 16645 (11832–22420)                     | 167.2% (154.7 to 181.3%) | 110.5 (78.3–149.5)      | 6.3% (2.1 to 10.9%)      |                          |
|         | Jordan |                                         | Parkinson's disease                     | 2072 (1426–2825)         | 200% (156.4 to 252.7%)  | 10.5 (7.3–14.2)          | 6.8% (-7.7 to 24.8%)     |
|         |        |                                         | Idiopathic epilepsy                     | 39664 (8430–82092)       | 95.1% (-53.5 to 838.5%) | 92.3 (20–189.2)          | -15.6% (-80.5 to 286.1%) |
|         |        |                                         | Multiple sclerosis                      | 3320 (2197–4752)         | 273% (215 to 339.5%)    | 9.7 (6.4–13.7)           | 19.1% (0.9 to 40.6%)     |
|         |        | Migraine                                | 253176 (40135–580495)                   | 181.6% (170.8 to 206.2%) | 595.4 (102.8–1355.6)    | 0.3% (-2.8 to 3.2%)      |                          |
|         |        | Tension-type headache                   | 26343 (8663–77009)                      | 193.4% (151.1 to 230.5%) | 66.2 (22.1–190.3)       | 0.7% (-11.1 to 9.1%)     |                          |
|         |        | Motor neuron disease                    | 218 (148–303)                           | 170.7% (154.7 to 186.6%) | 0.5 (0.4–0.7)           | 2.6% (-1.2 to 6.4%)      |                          |
|         |        | Other neurological disorders            | 12176 (3620–23961)                      | 175.6% (-13.8 to 915.1%) | 27.9 (9.7–53.7)         | 24.2% (-56.8 to 272.3%)  |                          |
|         |        | Headache disorders                      | 279519 (60086–621233)                   | 182.7% (170.9 to 204.1%) | 661.6 (153–1427.4)      | 0.3% (-3.3 to 3.5%)      |                          |
|         |        | Meningitis                              | 997 (660–1408)                          | 178.2% (129.5 to 241.1%) | 8.6 (5.8–12)            | -11.4% (-25.3 to 7.1%)   |                          |
|         |        | Encephalitis                            | 356 (246–484)                           | 197.7% (169.8 to 217.4%) | 3.1 (2.1–4.2)           | -9.9% (-17.7 to -4%)     |                          |
|         |        | Tetanus                                 | 0 (0–0)                                 | 11.7% (-38.3 to 76.3%)   | 0 (0–0)                 | -54.7% (-72.7 to -35.8%) |                          |
|         |        | Brain and central nervous system cancer | 174 (104–252)                           | 509% (285.8 to 731.1%)   | 1.7 (1.1–2.5)           | 62.9% (0.1 to 124.2%)    |                          |
|         |        | Stroke*                                 | 20515 (14870–25763)                     | 256.2% (235.6 to 277.3%) | 284.5 (207.6–358.1)     | -23.7% (-28.5 to -19.2%) |                          |
|         |        | Ischaemic stroke                        | 16657 (12027–21062)                     | 258.7% (234.4 to 283.5%) | 243 (176.8–308.3)       | -23.7% (-29.1 to -18.5%) |                          |
|         |        | Intracerebral haemorrhage               | 2747 (1923–3585)                        | 216.8% (181.1 to 254.4%) | 30.7 (21.8–39.7)        | -29.4% (-36.7 to -21.5%) |                          |
|         |        | Subarachnoid haemorrhage                | 1111 (765–1522)                         | 345% (283.5 to 415.2%)   | 10.8 (7.5–14.5)         | -1.4% (-14.7 to 14.6%)   |                          |
|         |        | Neurological disorders†                 | 97636 (36331–192445)                    | 245.4% (173.6 to 348.2%) | 907.9 (394.5–1704.5)    | -0.8% (-17.2 to 18.5%)   |                          |
| Kuwait  |        |                                         | Alzheimer's disease and other dementias | 4479 (3147–6083)         | 431% (401.7 to 459.4%)  | 111.6 (78.2–151.8)       | 3.7% (-1 to 8.3%)        |
|         |        |                                         | Parkinson's disease                     | 600 (414–838)            | 425% (342.9 to 517%)    | 10.9 (7.5–15.1)          | 2.8% (-13.4 to 19.7%)    |
|         |        | Idiopathic epilepsy                     | 10477 (2356–23076)                      | 154.2% (-40.2 to 939.2%) | 88.5 (20.3–192.5)       | -12.8% (-79.2 to 245.1%) |                          |
|         |        | Multiple sclerosis                      | 1198 (774–1659)                         | 343.4% (251.7 to 443.3%) | 12.1 (7.9–16.6)         | -1% (-21.1 to 20%)       |                          |
|         |        | Migraine                                | 70088 (11911–160288)                    | 250.2% (230.2 to 298.6%) | 590.3 (104–1339.1)      | -0.8% (-4 to 2.5%)       |                          |
|         |        | Tension-type headache                   | 7406 (2514–21769)                       | 276.6% (221.8 to 332.8%) | 66.2 (22.7–191.4)       | 0.1% (-10.9 to 8.3%)     |                          |
|         |        | Motor neuron disease                    | 65 (45–91)                              | 252.1% (224.4 to 277.9%) | 0.6 (0.4–0.8)           | 3% (-1.7 to 7.2%)        |                          |
|         |        | Other neurological disorders            | 3322 (1084–6819)                        | 263.1% (14.7 to 1066.3%) | 27.8 (10.1–54.6)        | 26.7% (-54.8 to 240.1%)  |                          |
|         |        | Headache disorders                      | 77495 (17367–171586)                    | 252.5% (233.2 to 298.1%) | 656.4 (153.8–1428.7)    | -0.7% (-3.9 to 2.5%)     |                          |
|         |        | Meningitis                              | 160 (111–217)                           | 109.8% (85.4 to 135.6%)  | 3.6 (2.5–4.9)           | -19.5% (-29 to -9.2%)    |                          |
|         |        | Encephalitis                            | 82 (56–113)                             | 178.7% (147.6 to 207.1%) | 1.7 (1.2–2.4)           | 1.8% (-9 to 12.2%)       |                          |



**Table S12** Burden, mortality, incidence, and prevalence of neurological conditions in North Africa and Middle East countries

| Measure | Cause                                   | Location                                | All Ages                                |                          | Age-standardised         |                          |                          |
|---------|-----------------------------------------|-----------------------------------------|-----------------------------------------|--------------------------|--------------------------|--------------------------|--------------------------|
|         |                                         |                                         | Number                                  | Percent change           | Rate per 100,000         | Percent change           |                          |
|         |                                         |                                         | 2019                                    | From 1990 to 2019        | 2019                     | From 1990 to 2019        |                          |
|         |                                         | Mean (95% UI)                           | Mean (95% UI)                           | Mean (95% UI)            | Mean (95% UI)            |                          |                          |
| Lebanon |                                         | Tetanus                                 | 0 (0–0)                                 | 123% (90.9 to 149.1%)    | 0 (0–0)                  | -9.2% (-21.4 to 1.3%)    |                          |
|         |                                         | Brain and central nervous system cancer | 73 (44–111)                             | 380.1% (193.4 to 556.2%) | 1.9 (1.2–2.9)            | 81.7% (11.4 to 148.3%)   |                          |
|         |                                         | Stroke*                                 | 6281 (4549–7999)                        | 262.6% (237.2 to 288.5%) | 189.4 (138.2–238)        | -6.8% (-12.1 to -1.3%)   |                          |
|         |                                         | Ischaemic stroke                        | 4675 (3370–5942)                        | 265.9% (237.1 to 297.9%) | 153.2 (111.1–193.1)      | -7.5% (-13.9 to -1.4%)   |                          |
|         |                                         | Intracerebral haemorrhage               | 1061 (734–1403)                         | 239.5% (187 to 294.7%)   | 25.9 (18.2–33.8)         | -6.3% (-17.3 to 4.8%)    |                          |
|         |                                         | Subarachnoid haemorrhage                | 545 (377–739)                           | 283.9% (223.4 to 357.4%) | 10.3 (7.2–13.9)          | 3% (-11.2 to 20.2%)      |                          |
|         |                                         | Neurological disorders†                 | 41195 (15568–81016)                     | 185.4% (126.4 to 264.3%) | 916.1 (399.6–1722.5)     | 1.2% (-18.1 to 24.3%)    |                          |
|         |                                         | Alzheimer's disease and other dementias | 2044 (1442–2740)                        | 406.6% (380.4 to 434.2%) | 116.3 (81.6–156.8)       | 0.6% (-3.7 to 5.4%)      |                          |
|         |                                         | Parkinson's disease                     | 232 (156–329)                           | 311.7% (238.6 to 396.9%) | 10.1 (6.8–13.9)          | -9.2% (-26.3 to 11.5%)   |                          |
|         |                                         | Idiopathic epilepsy                     | 4048 (964–9024)                         | 92.1% (-51.6 to 741.6%)  | 103.4 (23.9–231)         | -15.2% (-78.7 to 270.3%) |                          |
|         |                                         | Multiple sclerosis                      | 701 (466–983)                           | 468% (369.2 to 600.9%)   | 13.5 (9.1–18.5)          | 56.2% (32.3 to 85.2%)    |                          |
|         |                                         | Migraine                                | 29758 (5159–67375)                      | 190.2% (171.1 to 225.4%) | 578.3 (99.7–1315.1)      | 3.2% (-2.3 to 8.6%)      |                          |
|         |                                         | Tension-type headache                   | 3205 (1084–8967)                        | 204.5% (159.1 to 260.4%) | 62.8 (20.8–186.4)        | 1.5% (-10.4 to 11.9%)    |                          |
|         |                                         | Motor neuron disease                    | 32 (22–45)                              | 166.7% (143.3 to 192.9%) | 0.7 (0.5–0.9)            | -4.2% (-9.8 to 1.1%)     |                          |
|         |                                         | Other neurological disorders            | 1175 (429–2398)                         | 176.9% (-1 to 807.8%)    | 31.2 (11.4–65)           | 25% (-53.9 to 247.1%)    |                          |
|         |                                         | Headache disorders                      | 32963 (7555–71305)                      | 191.5% (173.1 to 225.4%) | 641.1 (146.8–1408)       | 3.1% (-2.3 to 7.9%)      |                          |
|         |                                         | Meningitis                              | 297 (204–404)                           | 9.3% (-5.5 to 26.6%)     | 5.7 (3.9–7.8)            | -31.5% (-40.5 to -21.3%) |                          |
|         | Libya                                   |                                         | Encephalitis                            | 196 (136–267)            | 40.1% (25.7 to 54.9%)    | 3.7 (2.6–5.1)            | -17.9% (-26.4 to -8.5%)  |
|         |                                         |                                         | Tetanus                                 | 0 (0–1)                  | -48.7% (-87.9 to 58.3%)  | 0 (0–0)                  | -77.4% (-94.2 to -30.2%) |
|         |                                         |                                         | Brain and central nervous system cancer | 164 (100–244)            | 318.6% (176.1 to 489%)   | 3.1 (1.9–4.6)            | 128.8% (50.9 to 223.1%)  |
|         |                                         | Stroke*                                 | 11799 (8708–14761)                      | 127.4% (116 to 140.3%)   | 224.6 (165.6–281.1)      | 1.8% (-2.8 to 7.2%)      |                          |
|         |                                         | Ischaemic stroke                        | 9967 (7343–12584)                       | 146.5% (132.8 to 161.4%) | 190.1 (140–240.3)        | 7.8% (1.9 to 14.1%)      |                          |
|         |                                         | Intracerebral haemorrhage               | 1302 (922–1675)                         | 52.5% (36 to 70.8%)      | 24.7 (17.4–31.6)         | -25.7% (-33.5 to -17%)   |                          |
|         |                                         | Subarachnoid haemorrhage                | 530 (363–729)                           | 81.8% (54.2 to 113.8%)   | 9.9 (6.8–13.6)           | -9.9% (-23.7 to 6.3%)    |                          |
|         |                                         | Neurological disorders†                 | 48653 (20353–92622)                     | 81.3% (48.1 to 132.4%)   | 931.4 (391–1772.2)       | -0.2% (-17.7 to 20.5%)   |                          |
|         |                                         | Alzheimer's disease and other dementias | 5722 (4024–7672)                        | 227.4% (206.9 to 246.6%) | 113.8 (79.9–152.6)       | 3.3% (-1.1 to 8.2%)      |                          |
|         |                                         | Parkinson's disease                     | 569 (396–783)                           | 184% (140.8 to 236.9%)   | 10.8 (7.5–14.9)          | 7.8% (-8.5 to 26.4%)     |                          |
|         |                                         | Idiopathic epilepsy                     | 4637 (1101–9995)                        | 24.1% (-71.5 to 456%)    | 91.5 (21.8–198.7)        | -16.9% (-81.2 to 270.9%) |                          |
|         |                                         | Multiple sclerosis                      | 739 (493–1016)                          | 174.4% (129 to 232.9%)   | 13.6 (9.1–18.6)          | 33% (11.9 to 61.6%)      |                          |
|         |                                         | Migraine                                | 31980 (5563–73108)                      | 76.4% (68.2 to 92.7%)    | 605.8 (104–1385.5)       | 0.5% (-2.7 to 3.5%)      |                          |
|         |                                         | Tension-type headache                   | 3565 (1217–10006)                       | 86.4% (59 to 108.4%)     | 67 (22.7–191.7)          | 0.8% (-10.8 to 9.4%)     |                          |
|         |                                         | Motor neuron disease                    | 31 (22–44)                              | 77.2% (65.9 to 87.5%)    | 0.6 (0.4–0.8)            | 2.8% (-1 to 6.9%)        |                          |
|         |                                         | Other neurological disorders            | 1409 (532–2801)                         | 73% (-37.5 to 470.2%)    | 28.3 (10.4–55.2)         | 21.8% (-55 to 271.5%)    |                          |
|         |                                         | Headache disorders                      | 35546 (8399–77063)                      | 77.3% (68.9 to 92.6%)    | 672.7 (153.9–1457.6)     | 0.5% (-3.1 to 3.7%)      |                          |
|         |                                         | Meningitis                              | 342 (237–460)                           | 57.8% (41 to 77.2%)      | 5 (3.5–6.8)              | -5.1% (-14.7 to 5.9%)    |                          |
|         |                                         | Encephalitis                            | 153 (105–209)                           | 153.6% (135.9 to 178.4%) | 2.2 (1.5–2.9)            | 39.6% (30.6 to 51.4%)    |                          |
|         |                                         | Tetanus                                 | 0 (0–0)                                 | -24.6% (-59.7 to 14.3%)  | 0 (0–0)                  | -46.2% (-73.2 to -18.6%) |                          |
|         | Brain and central nervous system cancer | 119 (76–173)                            | 154.9% (69.8 to 287.6%)                 | 1.9 (1.2–2.7)            | 33.2% (-5.8 to 94.8%)    |                          |                          |
|         | Stroke*                                 | 13742 (9969–17230)                      | 193% (177.2 to 209.7%)                  | 248.1 (179.9–311)        | 12.8% (6.9 to 18.8%)     |                          |                          |
|         | Ischaemic stroke                        | 11200 (8057–14164)                      | 220% (199.6 to 240.5%)                  | 209.8 (152.5–264.3)      | 21.6% (14.6 to 28.9%)    |                          |                          |
|         | Intracerebral haemorrhage               | 1857 (1298–2418)                        | 103.6% (80.7 to 127.9%)                 | 29 (20.5–37.8)           | -21.7% (-29.4 to -13.3%) |                          |                          |
|         | Subarachnoid haemorrhage                | 685 (470–950)                           | 145.8% (102.5 to 188.2%)                | 9.3 (6.4–12.8)           | -11% (-27.8 to 4%)       |                          |                          |
|         | Neurological disorders†                 | 62689 (24320–122168)                    | 92.6% (53.5 to 140.6%)                  | 904.5 (393.2–1713.4)     | -2% (-18.5 to 16.5%)     |                          |                          |

**Table S12** Burden, mortality, incidence, and prevalence of neurological conditions in North Africa and Middle East countries

| Measure                                 | Cause                                   | Location                                | All Ages                 |                          | Age-standardised         |                          |                      |
|-----------------------------------------|-----------------------------------------|-----------------------------------------|--------------------------|--------------------------|--------------------------|--------------------------|----------------------|
|                                         |                                         |                                         | Number                   | Percent change           | Rate per 100,000         | Percent change           |                      |
|                                         |                                         |                                         | 2019                     | From 1990 to 2019        | 2019                     | From 1990 to 2019        |                      |
|                                         |                                         | Mean (95% UI)                           | Mean (95% UI)            | Mean (95% UI)            | Mean (95% UI)            |                          |                      |
| Morocco                                 | Alzheimer's disease and other dementias |                                         | 4356 (3058–5850)         | 167.3% (155.4 to 180.6%) | 109 (76.7–145.9)         | -2.1% (-6.2 to 2.7%)     |                      |
|                                         | Parkinson's disease                     |                                         | 549 (370–760)            | 210.8% (170 to 263.7%)   | 11.8 (8–16.3)            | 12% (-2.8 to 31%)        |                      |
|                                         | Idiopathic epilepsy                     |                                         | 5538 (1612–10918)        | 7.8% (-69.3 to 350.6%)   | 85.6 (25–167.6)          | -26.2% (-78.6 to 201%)   |                      |
|                                         | Multiple sclerosis                      |                                         | 768 (520–1067)           | 253.4% (192.9 to 321.9%) | 10.5 (7.2–14.6)          | 29.1% (8.3 to 54.8%)     |                      |
|                                         | Migraine                                |                                         | 44893 (7730–101676)      | 103.6% (88.6 to 141.3%)  | 594.7 (104–1347)         | 1.3% (-1.9 to 4.4%)      |                      |
|                                         | Tension-type headache                   |                                         | 4920 (1694–13899)        | 122.3% (84.9 to 164.2%)  | 66.4 (22.8–191)          | 1.1% (-11.2 to 9.5%)     |                      |
|                                         | Motor neuron disease                    |                                         | 35 (24–49)               | 81.7% (64.2 to 98.3%)    | 0.5 (0.3–0.7)            | -4.9% (-8.6 to -0.9%)    |                      |
|                                         | Other neurological disorders            |                                         | 1630 (664–3036)          | 47.7% (-42.9 to 404.3%)  | 25.9 (10.8–47.7)         | 10.2% (-56.3 to 209.3%)  |                      |
|                                         | Headache disorders                      |                                         | 49812 (11832–107596)     | 105.3% (90.3 to 140.3%)  | 661.1 (155.4–1425.1)     | 1.3% (-2.2 to 4.6%)      |                      |
|                                         | Meningitis                              |                                         | 2442 (1667–3340)         | -18.3% (-30.3 to -2.8%)  | 6.8 (4.7–9.3)            | -42.1% (-49.9 to -32%)   |                      |
|                                         | Encephalitis                            |                                         | 1159 (806–1589)          | 47.7% (36.5 to 60.2%)    | 3.1 (2.2–4.3)            | -3.2% (-10.4 to 4.8%)    |                      |
|                                         | Tetanus                                 |                                         | 4 (2–7)                  | -81.5% (-91.7 to -62.2%) | 0 (0–0)                  | -82% (-91.4 to -65.1%)   |                      |
|                                         | Brain and central nervous system cancer |                                         | 218 (131–332)            | 123.8% (33.3 to 228.5%)  | 0.6 (0.4–0.9)            | 36.2% (-14 to 92.3%)     |                      |
|                                         | Stroke*                                 |                                         | 85229 (62093–106733)     | 119.2% (108.3 to 131.5%) | 265.1 (194.2–333)        | 3.4% (-1.4 to 9.1%)      |                      |
|                                         | Ischaemic stroke                        |                                         | 70229 (50759–88434)      | 143.8% (129.5 to 159.4%) | 223 (161.5–281)          | 12.6% (6.4 to 19.5%)     |                      |
|                                         | Intracerebral haemorrhage               |                                         | 11457 (8143–14677)       | 46.4% (32.2 to 61.3%)    | 32.6 (23–41.7)           | -29.1% (-35.7 to -22.3%) |                      |
|                                         | Subarachnoid haemorrhage                |                                         | 3543 (2444–4750)         | 58.3% (30.8 to 84%)      | 9.6 (6.6–12.8)           | -22.8% (-36.1 to -9.7%)  |                      |
|                                         | Neurological disorders†                 |                                         | 327176 (124928–641409)   | 62.1% (28.2 to 109.9%)   | 925.7 (383.4–1774.1)     | 1.1% (-18.1 to 23.1%)    |                      |
|                                         | Palestine                               | Alzheimer's disease and other dementias |                          | 24732 (17391–33330)      | 145.7% (134 to 158.8%)   | 110.9 (77.8–149.4)       | -0.2% (-4.4 to 4.5%) |
|                                         |                                         | Parkinson's disease                     |                          | 2959 (2025–4161)         | 176.2% (132.8 to 232.9%) | 10.5 (7.2–14.6)          | 19.4% (0.8 to 42.1%) |
| Idiopathic epilepsy                     |                                         |                                         | 33678 (7332–72053)       | 30.9% (-74.5 to 553.2%)  | 96 (21–203.5)            | -0.5% (-80.9 to 388.9%)  |                      |
| Multiple sclerosis                      |                                         |                                         | 3853 (2549–5380)         | 145.6% (107 to 193.4%)   | 10.4 (6.9–14.5)          | 23.9% (4.6 to 46.7%)     |                      |
| Migraine                                |                                         |                                         | 226776 (38690–515523)    | 58.5% (50.7 to 80.5%)    | 601.7 (104.2–1370.5)     | -0.3% (-3.3 to 3%)       |                      |
| Tension-type headache                   |                                         |                                         | 24818 (8463–69426)       | 70.5% (47.5 to 93.4%)    | 66.5 (22.7–187.3)        | 0.2% (-9.8 to 8.1%)      |                      |
| Motor neuron disease                    |                                         |                                         | 183 (125–256)            | 62.3% (51.4 to 73.3%)    | 0.5 (0.3–0.7)            | 4% (0 to 8%)             |                      |
| Other neurological disorders            |                                         |                                         | 10177 (3267–20278)       | 80.6% (-47.6 to 585.6%)  | 29.1 (9.6–58)            | 40.2% (-57.1 to 346.5%)  |                      |
| Headache disorders                      |                                         |                                         | 251594 (58542–544979)    | 59.6% (51.6 to 78.5%)    | 668.2 (156.2–1445.1)     | -0.2% (-3.6 to 3.1%)     |                      |
| Meningitis                              |                                         |                                         | 372 (255–515)            | 39.3% (21.3 to 59.7%)    | 7.6 (5.2–10.4)           | -42% (-49 to -33.9%)     |                      |
| Encephalitis                            |                                         |                                         | 201 (139–280)            | 153.5% (127 to 181.8%)   | 4.2 (2.9–5.8)            | -3.1% (-12.4 to 6.9%)    |                      |
| Tetanus                                 |                                         |                                         | 0 (0–0)                  | -58.1% (-87.2 to 12.5%)  | 0 (0–0)                  | -72.5% (-90.1 to -44.6%) |                      |
| Brain and central nervous system cancer |                                         |                                         | 121 (79–167)             | 216.7% (92.4 to 357.9%)  | 3.2 (2–4.3)              | 25.1% (-19.5 to 76.2%)   |                      |
| Stroke*                                 |                                         |                                         | 6341 (4621–7995)         | 161% (146.3 to 176.7%)   | 238 (173.6–302.4)        | -3.9% (-9.4 to 1.6%)     |                      |
| Ischaemic stroke                        |                                         |                                         | 5124 (3703–6496)         | 163.5% (146.1 to 183.8%) | 203.2 (147.6–260.1)      | -0.9% (-7.4 to 5.9%)     |                      |
| Intracerebral haemorrhage               |                                         |                                         | 858 (601–1132)           | 134% (107.2 to 161.3%)   | 25.4 (17.9–32.8)         | -22% (-30.1 to -12.9%)   |                      |
| Subarachnoid haemorrhage                |                                         |                                         | 359 (242–486)            | 202.8% (161.5 to 251.9%) | 9.5 (6.5–12.9)           | -5.3% (-18.9 to 11%)     |                      |
| Neurological disorders†                 |                                         |                                         | 39889 (14998–78109)      | 166.7% (106 to 236.2%)   | 915.4 (406.2–1702.6)     | -0.9% (-17.1 to 18%)     |                      |
| Alzheimer's disease and other dementias |                                         |                                         | 1679 (1195–2282)         | 131.4% (119.3 to 143.7%) | 111.6 (78.9–150.6)       | 1.5% (-3.4 to 6.1%)      |                      |
| Parkinson's disease                     |                                         |                                         | 218 (149–307)            | 159.2% (115.7 to 204.1%) | 11 (7.6–15.1)            | 1.2% (-13.4 to 18%)      |                      |
| Idiopathic epilepsy                     |                                         | 4710 (1129–9817)                        | 108.4% (-54.9 to 925.8%) | 92 (22.5–190.6)          | -10.2% (-80.5 to 341.2%) |                          |                      |
| Multiple sclerosis                      |                                         | 386 (259–538)                           | 263.1% (206 to 331.9%)   | 10.5 (7–14.5)            | 16.9% (-0.6 to 39.5%)    |                          |                      |
| Migraine                                |                                         | 28492 (4390–66341)                      | 177.7% (166.5 to 199.2%) | 596.1 (102.5–1357.3)     | -1.1% (-4.1 to 1.9%)     |                          |                      |
| Tension-type headache                   |                                         | 2914 (952–8613)                         | 187.4% (144.1 to 219.3%) | 66.2 (22.1–187.5)        | -0.3% (-13 to 9.3%)      |                          |                      |
| Motor neuron disease                    |                                         | 25 (17–35)                              | 175.2% (158.3 to 189.6%) | 0.5 (0.4–0.8)            | 4% (0 to 7.7%)           |                          |                      |



**Table S12** Burden, mortality, incidence, and prevalence of neurological conditions in North Africa and Middle East countries

| Measure      | Cause | Location                                | All Ages                     |                            | Age-standardised         |                          |
|--------------|-------|-----------------------------------------|------------------------------|----------------------------|--------------------------|--------------------------|
|              |       |                                         | Number                       | Percent change             | Rate per 100,000         | Percent change           |
|              |       |                                         | 2019                         | From 1990 to 2019          | 2019                     | From 1990 to 2019        |
|              |       | Mean (95% UI)                           | Mean (95% UI)                | Mean (95% UI)              | Mean (95% UI)            |                          |
| Oman         |       | Other neurological disorders            | 1464 (445–2897)              | 195.7% (-14.6 to 1003.2%)  | 27.5 (9.6–51.9)          | 27.6% (-55.3 to 278.1%)  |
|              |       | Headache disorders                      | 31406 (6765–70639)           | 178.6% (166.2 to 198.3%)   | 662.3 (157.1–1439.2)     | -1% (-4.4 to 2.1%)       |
|              |       | Meningitis                              | 71 (48–100)                  | 59.2% (39.1 to 81.2%)      | 1.6 (1.1–2.2)            | -32.6% (-40.7 to -23.8%) |
|              |       | Encephalitis                            | 137 (95–190)                 | 112.6% (90.4 to 136.2%)    | 3 (2.1–4.1)              | -17.2% (-25.6 to -8.2%)  |
|              |       | Tetanus                                 | 0 (0–0)                      | -25.8% (-69.3 to 53.4%)    | 0 (0–0)                  | -78.1% (-93.8 to -34.9%) |
|              |       | Brain and central nervous system cancer | 59 (30–92)                   | 514.4% (193.5 to 920.7%)   | 1.6 (0.9–2.4)            | 130.8% (13.7 to 260.4%)  |
|              |       | Stroke*                                 | 5523 (3941–7070)             | 162% (145.6 to 179%)       | 237.2 (174.1–301.6)      | -8.1% (-12.8 to -3%)     |
|              |       | Ischaemic stroke                        | 4152 (2977–5371)             | 173% (151.6 to 194.5%)     | 197.7 (145.4–253.1)      | -2.6% (-8.7 to 3.8%)     |
|              |       | Intracerebral haemorrhage               | 1005 (708–1327)              | 120.8% (94.1 to 152.2%)    | 31.1 (22.2–40)           | -30.2% (-36.7 to -22.6%) |
|              |       | Subarachnoid haemorrhage                | 366 (253–495)                | 176.3% (133.9 to 220%)     | 8.3 (5.8–11.3)           | -19.2% (-32.4 to -5.8%)  |
|              |       | Neurological disorders†                 | 38140 (13649–75171)          | 175.9% (112.6 to 250.9%)   | 877.8 (389.3–1634.8)     | 0.7% (-17.7 to 24.3%)    |
|              |       | Alzheimer's disease and other dementias | 907 (642–1232)               | 140.1% (127.7 to 155.2%)   | 113.4 (79.6–152)         | 0.8% (-3.4 to 5.3%)      |
|              |       | Parkinson's disease                     | 199 (133–284)                | 214% (165.6 to 267.9%)     | 15.6 (10.6–21.4)         | 26.7% (8.5 to 46.6%)     |
|              |       | Idiopathic epilepsy                     | 3890 (946–8304)              | 107.9% (-53.3 to 851.7%)   | 92.8 (22.2–199.6)        | -0.4% (-77.1 to 347%)    |
|              |       | Multiple sclerosis                      | 393 (262–556)                | 346.2% (275.8 to 434%)     | 8.8 (5.9–12.2)           | 30.8% (10.3 to 55.9%)    |
|              |       | Migraine                                | 28437 (4879–64400)           | 185% (166.5 to 226.5%)     | 554.2 (98.7–1256.8)      | -1.4% (-4.5 to 1.9%)     |
|              |       | Tension-type headache                   | 3196 (1042–8985)             | 208.1% (154.1 to 256.4%)   | 64.3 (21.6–190.1)        | 0% (-15.4 to 10.8%)      |
|              |       | Motor neuron disease                    | 25 (17–34)                   | 182.6% (159.7 to 207.3%)   | 0.5 (0.3–0.7)            | 2.7% (-1.3 to 6.9%)      |
|              | Qatar |                                         | Other neurological disorders | 1095 (363–2211)            | 171.8% (-21.8 to 887.6%) | 28.1 (10.4–55.7)         |
|              |       | Headache disorders                      | 31633 (7474–67794)           | 187.2% (168.1 to 223.2%)   | 618.5 (146.4–1332.9)     | -1.2% (-4.9 to 2.6%)     |
|              |       | Meningitis                              | 235 (156–332)                | 433.6% (314.1 to 580.1%)   | 8 (5.4–10.9)             | -22.2% (-36.6 to -5.3%)  |
|              |       | Encephalitis                            | 42 (29–57)                   | 540.5% (486.5 to 583.1%)   | 1.4 (0.9–1.9)            | -6% (-13.9 to 1.1%)      |
|              |       | Tetanus                                 | 0 (0–0)                      | 322.8% (141.9 to 430%)     | 0 (0–0)                  | -27.4% (-63.8 to -3.7%)  |
|              |       | Brain and central nervous system cancer | 49 (27–89)                   | 1494.2% (769.7 to 2457.2%) | 2.4 (1.5–3.8)            | 97.1% (16.7 to 204.4%)   |
|              |       | Stroke*                                 | 3099 (2242–3978)             | 555.1% (505.9 to 612.7%)   | 182.2 (132.5–228.2)      | -24.2% (-28.2 to -19.9%) |
|              |       | Ischaemic stroke                        | 2104 (1497–2721)             | 577.8% (513.3 to 654.7%)   | 143.4 (105–182.3)        | -23.4% (-28.4 to -18.4%) |
|              |       | Intracerebral haemorrhage               | 669 (464–884)                | 486.1% (398.9 to 596.6%)   | 28.6 (20.2–36.5)         | -30% (-37.3 to -22.4%)   |
|              |       | Subarachnoid haemorrhage                | 327 (223–443)                | 571.8% (450.8 to 693.6%)   | 10.2 (7–13.8)            | -17.9% (-36.9 to -2.8%)  |
|              |       | Neurological disorders†                 | 24393 (9303–47736)           | 572% (407.4 to 748.7%)     | 861.3 (393.5–1543.5)     | -3.5% (-24.6 to 22.3%)   |
|              |       | Alzheimer's disease and other dementias | 338 (231–473)                | 637.3% (552.5 to 735.9%)   | 110.5 (77.2–147.4)       | 2.8% (-1.9 to 8%)        |
|              |       | Parkinson's disease                     | 112 (72–165)                 | 807.3% (650 to 989.8%)     | 16.4 (11.3–22.5)         | 18% (0.7 to 36.9%)       |
|              |       | Idiopathic epilepsy                     | 2530 (608–5562)              | 355.7% (9.8 to 1964.2%)    | 103.9 (25.2–227.9)       | -22.8% (-80.9 to 249.8%) |
|              |       | Multiple sclerosis                      | 465 (313–641)                | 1172.4% (915.4 to 1561.2%) | 14.1 (9.8–18.9)          | 52.2% (26 to 86.9%)      |
|              |       | Migraine                                | 18109 (3233–40461)           | 601.2% (567.3 to 669.2%)   | 523 (94.3–1174.9)        | -2.7% (-6.2 to 0.8%)     |
|              |       | Tension-type headache                   | 2135 (699–6004)              | 643.8% (552 to 739.5%)     | 62 (20.7–184.7)          | -1.4% (-11.6 to 7.2%)    |
|              |       | Motor neuron disease                    | 20 (13–28)                   | 631.4% (587.1 to 678.9%)   | 0.6 (0.4–0.8)            | 4.2% (-0.3 to 8.7%)      |
|              |       | Other neurological disorders            | 684 (252–1366)               | 536.4% (124.1 to 2135.2%)  | 30.8 (11.5–61.1)         | 16.1% (-56.9 to 248.4%)  |
| Saudi Arabia |       | Headache disorders                      | 20244 (5008–42949)           | 605.4% (571.7 to 667.4%)   | 585 (140.4–1252)         | -2.6% (-5.8 to 0.9%)     |
|              |       | Meningitis                              | 1038 (713–1412)              | 80.9% (59.7 to 105.7%)     | 2.9 (2–4)                | -25.2% (-34.1 to -15.2%) |
|              |       | Encephalitis                            | 680 (473–947)                | 140.7% (117.8 to 165%)     | 1.8 (1.3–2.5)            | -7.6% (-16.3 to 1.9%)    |
|              |       | Tetanus                                 | 1 (0–1)                      | -76% (-93.8 to -17.7%)     | 0 (0–0)                  | -87.9% (-96.6 to -59.1%) |
|              |       | Brain and central nervous system cancer | 619 (372–994)                | 932.3% (436 to 1905.1%)    | 1.8 (1.2–2.9)            | 237.6% (77.8 to 536.9%)  |
|              |       | Stroke*                                 | 68914 (48974–87456)          | 226.9% (200.7 to 255.2%)   | 299.4 (218.9–378.4)      | 7.2% (-1.5 to 15.6%)     |
|              |       | Ischaemic stroke                        | 44814 (32037–57463)          | 240.3% (202.3 to 280.5%)   | 222 (162.1–281.5)        | 12.5% (0.7 to 24.5%)     |

**Table S12** Burden, mortality, incidence, and prevalence of neurological conditions in North Africa and Middle East countries

| Measure                                 | Cause                                   | Location              | All Ages                 |                          | Age-standardised         |                          |
|-----------------------------------------|-----------------------------------------|-----------------------|--------------------------|--------------------------|--------------------------|--------------------------|
|                                         |                                         |                       | Number                   | Percent change           | Rate per 100,000         | Percent change           |
|                                         |                                         |                       | 2019                     | From 1990 to 2019        | 2019                     | From 1990 to 2019        |
|                                         |                                         | Mean (95% UI)         | Mean (95% UI)            | Mean (95% UI)            | Mean (95% UI)            |                          |
| Syrian Arab Republic                    | Intracerebral haemorrhage               |                       | 20788 (14337–27557)      | 198.4% (164.8 to 235.6%) | 68.9 (48.4–89.2)         | -5.7% (-13.5 to 3.3%)    |
|                                         | Subarachnoid haemorrhage                |                       | 3312 (2288–4602)         | 249.5% (196.9 to 308.4%) | 8.5 (5.9–11.6)           | -2.9% (-16.7 to 12.6%)   |
|                                         | Neurological disorders†                 |                       | 338288 (128872–653216)   | 172.5% (108.9 to 275.5%) | 949.3 (419–1737.1)       | 3.3% (-18.3 to 35.6%)    |
|                                         | Alzheimer's disease and other dementias |                       | 9112 (6427–12276)        | 128.3% (112.8 to 144.1%) | 109.4 (76.6–146.3)       | 1.2% (-3.3 to 5.8%)      |
|                                         | Parkinson's disease                     |                       | 1928 (1291–2728)         | 239.4% (184.2 to 304.5%) | 14.8 (10.2–20.4)         | 27.1% (8.4 to 48.9%)     |
|                                         | Idiopathic epilepsy                     |                       | 51551 (12678–107945)     | 142.1% (-39.5 to 872.6%) | 152.9 (37.8–320)         | 12.9% (-72.7 to 356.7%)  |
|                                         | Multiple sclerosis                      |                       | 2841 (1830–4067)         | 353.6% (279.3 to 435.7%) | 7.3 (4.8–10.2)           | 25.4% (6.8 to 45.1%)     |
|                                         | Migraine                                |                       | 234239 (41410–528197)    | 176.4% (152.8 to 229.1%) | 562 (99.4–1276.9)        | -1.2% (-5.9 to 3.8%)     |
|                                         | Tension-type headache                   |                       | 25584 (9050–70083)       | 202% (136.9 to 255%)     | 63 (22–180.3)            | -0.3% (-18.6 to 10.8%)   |
|                                         | Motor neuron disease                    |                       | 197 (135–277)            | 166.9% (141.5 to 192.2%) | 0.5 (0.4–0.7)            | 2.9% (-0.9 to 6.8%)      |
|                                         | Other neurological disorders            |                       | 12836 (4055–26144)       | 195.5% (-14.4 to 925.6%) | 39.3 (13.3–79.7)         | 54.1% (-52.8 to 379.6%)  |
|                                         | Headache disorders                      |                       | 259823 (62718–548786)    | 178.7% (155.8 to 227.9%) | 625 (149.7–1343.4)       | -1.1% (-6.2 to 3.8%)     |
|                                         | Meningitis                              |                       | 1196 (807–1614)          | -30.8% (-40.3 to -19.4%) | 8.2 (5.6–11.2)           | -38.4% (-46.4 to -29.7%) |
|                                         | Encephalitis                            |                       | 551 (387–752)            | 16.4% (8 to 25.4%)       | 3.7 (2.6–5.1)            | -7.5% (-13.3 to -0.9%)   |
|                                         | Tetanus                                 |                       | 0 (0–0)                  | -87.9% (-94.9 to -69.9%) | 0 (0–0)                  | -83.4% (-92.1 to -67.4%) |
|                                         | Brain and central nervous system cancer |                       | 293 (185–435)            | 122.3% (34.4 to 241%)    | 2.1 (1.4–3.2)            | 42.3% (-4.4 to 112.2%)   |
|                                         | Stroke*                                 |                       | 30049 (22030–37974)      | 77.7% (68.4 to 86.5%)    | 234.1 (172.3–295.5)      | -13.7% (-17.7 to -9.6%)  |
|                                         | Ischaemic stroke                        |                       | 22824 (16673–29014)      | 94.5% (82.4 to 106.8%)   | 182.8 (133.9–233.7)      | -8.8% (-13.6 to -3.7%)   |
|                                         | Intracerebral haemorrhage               |                       | 5870 (4115–7482)         | 35.3% (22.2 to 49.3%)    | 42.1 (29.6–53.2)         | -29.9% (-36.5 to -23.2%) |
|                                         | Subarachnoid haemorrhage                |                       | 1355 (917–1857)          | 62.7% (29.4 to 92.5%)    | 9.2 (6.4–12.4)           | -14.4% (-30.5 to 0.6%)   |
|                                         | Neurological disorders†                 |                       | 128515 (48961–253992)    | 38.9% (11.1 to 84.7%)    | 916.3 (384.9–1745.3)     | 1.8% (-14.4 to 23%)      |
|                                         | Alzheimer's disease and other dementias |                       | 8807 (6210–11896)        | 109.5% (95.8 to 123.9%)  | 110.8 (77.7–149.2)       | 0.3% (-4 to 5.3%)        |
|                                         | Parkinson's disease                     |                       | 1198 (821–1670)          | 158.5% (118.1 to 207.3%) | 11.5 (8–15.9)            | 10.1% (-6.3 to 30.5%)    |
| Idiopathic epilepsy                     |                                         | 11625 (2685–24285)    | -3.4% (-79.6 to 382.7%)  | 79.9 (18.6–167.4)        | -6.2% (-79.8 to 370.4%)  |                          |
| Multiple sclerosis                      |                                         | 1511 (1018–2113)      | 124.9% (89.3 to 167.5%)  | 10.8 (7.3–15)            | 22.4% (3.8 to 43.8%)     |                          |
| Migraine                                |                                         | 91621 (15453–212202)  | 39.1% (31.2 to 62.3%)    | 609.9 (105.1–1394.5)     | 1.7% (-1.9 to 5.2%)      |                          |
| Tension-type headache                   |                                         | 9810 (3361–28381)     | 51.2% (24.9 to 78.8%)    | 67 (22.9–189.7)          | 1.1% (-10.5 to 9.5%)     |                          |
| Motor neuron disease                    |                                         | 78 (53–110)           | 28.3% (17.7 to 41.1%)    | 0.5 (0.4–0.8)            | 0.5% (-3.4 to 4.6%)      |                          |
| Other neurological disorders            |                                         | 3865 (1320–7291)      | 42.2% (-55.8 to 438.3%)  | 25.9 (9.4–49.2)          | 37.1% (-54.2 to 305.1%)  |                          |
| Headache disorders                      |                                         | 101431 (22875–223796) | 40.2% (32.3 to 61.8%)    | 676.9 (157.1–1474.2)     | 1.7% (-2.1 to 5.1%)      |                          |
| Meningitis                              |                                         | 765 (524–1050)        | 6.7% (-6.7 to 24.3%)     | 6.5 (4.5–9.1)            | -25% (-33.6 to -12.7%)   |                          |
| Encephalitis                            |                                         | 372 (257–506)         | 36.2% (23.4 to 51%)      | 3.1 (2.1–4.2)            | -10.5% (-18.6 to -1.5%)  |                          |
| Tetanus                                 |                                         | 0 (0–0)               | -45.6% (-75.1 to -9.6%)  | 0 (0–0)                  | -56.9% (-80.3 to -30.5%) |                          |
| Brain and central nervous system cancer |                                         | 98 (59–151)           | 187.5% (71.7 to 334.5%)  | 0.8 (0.5–1.3)            | 83.1% (10.5 to 174.5%)   |                          |
| Stroke*                                 |                                         | 24933 (18357–31268)   | 180.2% (164.4 to 196.5%) | 199.4 (146.5–250.1)      | 21.2% (14.7 to 27.8%)    |                          |
| Ischaemic stroke                        |                                         | 21265 (15507–26856)   | 194.8% (176.7 to 214.1%) | 171.2 (125.8–216.1)      | 25.1% (18 to 33%)        |                          |
| Intracerebral haemorrhage               |                                         | 2401 (1672–3170)      | 117.3% (89.7 to 151%)    | 18.6 (12.9–24.6)         | 1% (-11.9 to 16.4%)      |                          |
| Subarachnoid haemorrhage                |                                         | 1266 (873–1737)       | 118.1% (71.9 to 163.3%)  | 9.6 (6.6–13)             | 2.9% (-19.3 to 24.5%)    |                          |
| Neurological disorders†                 |                                         | 109299 (46257–207558) | 64.6% (41.2 to 114.7%)   | 916.1 (393.8–1740)       | 1.6% (-12.7 to 20.5%)    |                          |
| Alzheimer's disease and other dementias |                                         | 12094 (8498–16332)    | 221.5% (202.1 to 243%)   | 114.9 (80.6–155.1)       | 1.3% (-2.8 to 5.4%)      |                          |
| Parkinson's disease                     |                                         | 1324 (903–1807)       | 202.6% (153.7 to 262.6%) | 11.2 (7.7–15.2)          | 13.9% (-3.3 to 34.8%)    |                          |
| Idiopathic epilepsy                     |                                         | 8669 (2011–19193)     | 23.8% (-69.5 to 529.6%)  | 78.3 (18.3–168)          | -0.5% (-75.3 to 381.1%)  |                          |
| Multiple sclerosis                      |                                         | 1683 (1146–2277)      | 165% (124 to 214.2%)     | 12.7 (8.7–17.3)          | 27.1% (6.9 to 50.3%)     |                          |
| Tunisia                                 |                                         |                       |                          |                          |                          |                          |
|                                         |                                         |                       |                          |                          |                          |                          |
|                                         |                                         |                       |                          |                          |                          |                          |
|                                         |                                         |                       |                          |                          |                          |                          |
|                                         |                                         |                       |                          |                          |                          |                          |
|                                         |                                         |                       |                          |                          |                          |                          |
|                                         |                                         |                       |                          |                          |                          |                          |
|                                         |                                         |                       |                          |                          |                          |                          |
|                                         |                                         |                       |                          |                          |                          |                          |
|                                         |                                         |                       |                          |                          |                          |                          |
|                                         |                                         |                       |                          |                          |                          |                          |

**Table S12** Burden, mortality, incidence, and prevalence of neurological conditions in North Africa and Middle East countries

| Measure                                 | Cause                                   | Location            | All Ages                 |                           | Age-standardised         |                          |                         |
|-----------------------------------------|-----------------------------------------|---------------------|--------------------------|---------------------------|--------------------------|--------------------------|-------------------------|
|                                         |                                         |                     | Number                   | Percent change            | Rate per 100,000         | Percent change           |                         |
|                                         |                                         |                     | 2019                     | From 1990 to 2019         | 2019                     | From 1990 to 2019        |                         |
|                                         |                                         | Mean (95% UI)       | Mean (95% UI)            | Mean (95% UI)             | Mean (95% UI)            |                          |                         |
| Türkiye                                 | Migraine                                |                     | 74318 (13231–168600)     | 54.9% (45.1 to 82.1%)     | 606.3 (104.4–1382.7)     | 0.3% (-2.6 to 3.4%)      |                         |
|                                         | Tension-type headache                   |                     | 8414 (2880–23528)        | 70.6% (42.7 to 97.2%)     | 67 (22.6–192.5)          | 0.7% (-10.7 to 8.5%)     |                         |
|                                         | Motor neuron disease                    |                     | 71 (49–99)               | 61.1% (48.2 to 75.5%)     | 0.6 (0.4–0.8)            | 4.1% (-0.5 to 8.1%)      |                         |
|                                         | Other neurological disorders            |                     | 2727 (1117–5118)         | 70.6% (-35.2 to 451.1%)   | 25 (9.6–47.4)            | 38.2% (-48.7 to 285.9%)  |                         |
|                                         | Headache disorders                      |                     | 82732 (20234–176614)     | 56.3% (46.6 to 81.3%)     | 673.3 (158.7–1448.7)     | 0.3% (-3.1 to 3.5%)      |                         |
|                                         | Meningitis                              |                     | 1235 (835–1710)          | -49.8% (-56.7 to -42%)    | 1.5 (1–2.1)              | -64.1% (-69 to -58.5%)   |                         |
|                                         | Encephalitis                            |                     | 2677 (1834–3686)         | 35.4% (19 to 50.4%)       | 3.1 (2.1–4.3)            | -10.6% (-21.2 to -0.5%)  |                         |
|                                         | Tetanus                                 |                     | 1 (1–2)                  | -87.3% (-94 to -72.3%)    | 0 (0–0)                  | -92.6% (-96.6 to -81.5%) |                         |
|                                         | Brain and central nervous system cancer |                     | 2518 (1094–3941)         | 178.5% (50.6 to 349.9%)   | 3 (1.3–4.7)              | 67.7% (-3.5 to 160.9%)   |                         |
|                                         | Stroke*                                 |                     | 168016 (122306–211256)   | 104.2% (93.2 to 116%)     | 191.2 (139.3–239.6)      | -8.6% (-13.2 to -3.6%)   |                         |
|                                         | Ischaemic stroke                        |                     | 126600 (92718–160564)    | 117.6% (102.4 to 133.2%)  | 145.8 (106.5–184)        | -5.7% (-11.7 to 0.5%)    |                         |
|                                         | Intracerebral haemorrhage               |                     | 30767 (21581–39288)      | 74.8% (56.5 to 93.9%)     | 34.2 (24.1–43.7)         | -15.9% (-24.3 to -6.6%)  |                         |
|                                         | Subarachnoid haemorrhage                |                     | 10649 (7316–14357)       | 63.5% (38.4 to 92.1%)     | 11.3 (7.8–15.2)          | -19.5% (-31.6 to -4.8%)  |                         |
|                                         | Neurological disorders†                 |                     | 833810 (374048–1538176)  | 61.1% (30.1 to 120.6%)    | 966.5 (437.5–1760)       | 1% (-18.7 to 29.4%)      |                         |
|                                         | Alzheimer's disease and other dementias |                     | 92726 (65127–124219)     | 199.6% (185.3 to 212.4%)  | 116.9 (82–157.2)         | 3.9% (-0.7 to 8.2%)      |                         |
|                                         | United Arab Emirates                    | Parkinson's disease |                          | 10292 (7018–14162)        | 220.9% (175.2 to 275.1%) | 12.3 (8.4–16.8)          | 21.5% (4.3 to 41.8%)    |
|                                         |                                         | Idiopathic epilepsy |                          | 102409 (24971–214021)     | 18.7% (-71.1 to 432.2%)  | 131.3 (32.4–273.9)       | -5.2% (-76.5 to 327.2%) |
| Multiple sclerosis                      |                                         |                     | 11771 (8260–15345)       | 109.3% (78 to 144.8%)     | 12.5 (8.8–16.3)          | 2.9% (-11.9 to 20%)      |                         |
| Migraine                                |                                         |                     | 528078 (101819–1197352)  | 56.6% (45.4 to 81.9%)     | 589.6 (110.2–1340.7)     | 0.2% (-4.5 to 5.2%)      |                         |
| Tension-type headache                   |                                         |                     | 60666 (21747–160117)     | 71.5% (44.9 to 93.8%)     | 66.6 (23.6–180)          | 0.8% (-10 to 10.1%)      |                         |
| Motor neuron disease                    |                                         |                     | 672 (464–916)            | 77.3% (64.6 to 89.4%)     | 0.8 (0.5–1)              | 10.2% (6.2 to 14.5%)     |                         |
| Other neurological disorders            |                                         |                     | 27197 (10055–51718)      | 46.3% (-49 to 378.4%)     | 36.7 (13–71.8)           | 26.5% (-57.8 to 276.8%)  |                         |
| Headache disorders                      |                                         |                     | 588744 (155386–1275312)  | 58% (47.2 to 81%)         | 656.1 (167.7–1433)       | 0.3% (-4.6 to 5%)        |                         |
| Meningitis                              |                                         |                     | 302 (208–415)            | 333.9% (292.3 to 376.9%)  | 3.6 (2.5–4.9)            | -16.1% (-24.9 to -6.1%)  |                         |
| Encephalitis                            |                                         |                     | 165 (113–229)            | 591.3% (545.5 to 639.8%)  | 1.6 (1.1–2.2)            | 28.8% (19.3 to 38%)      |                         |
| Tetanus                                 |                                         |                     | 0 (0–1)                  | 19.4% (-65.4 to 265.1%)   | 0 (0–0)                  | -83% (-95 to -29.7%)     |                         |
| Brain and central nervous system cancer |                                         |                     | 180 (89–302)             | 736.5% (427.5 to 1139.8%) | 2.1 (1.1–3.2)            | 25.8% (-25.8 to 91.7%)   |                         |
| Stroke*                                 |                                         |                     | 18775 (13548–24191)      | 686.9% (628.8 to 746.8%)  | 336.4 (245.1–425.6)      | -10.2% (-14.8 to -5.7%)  |                         |
| Ischaemic stroke                        |                                         |                     | 14430 (10385–18659)      | 754.8% (678.1 to 839.9%)  | 289.4 (210–368)          | -5.9% (-11.6 to -0.7%)   |                         |
| Intracerebral haemorrhage               |                                         |                     | 3249 (2285–4213)         | 492.2% (407.8 to 599.6%)  | 38.7 (27.7–49.6)         | -32% (-37.9 to -25.2%)   |                         |
| Subarachnoid haemorrhage                |                                         |                     | 1097 (754–1555)          | 634.3% (522.4 to 767.7%)  | 8.2 (5.7–11.3)           | -15.8% (-27 to -3.1%)    |                         |
| Neurological disorders†                 |                                         |                     | 84688 (33224–163183)     | 430.1% (298.9 to 626.6%)  | 917 (419.7–1693.9)       | -4.9% (-28.6 to 25.3%)   |                         |
| Alzheimer's disease and other dementias |                                         | 1032 (696–1462)     | 610.5% (527.9 to 705.4%) | 103.7 (72.7–139.5)        | -0.4% (-4.8 to 3.8%)     |                          |                         |
| Yemen                                   | Parkinson's disease                     |                     | 474 (311–710)            | 907.8% (719.4 to 1151.3%) | 16.1 (11.3–22.3)         | 10.9% (-4.2 to 28.2%)    |                         |
|                                         | Idiopathic epilepsy                     |                     | 11873 (3086–23522)       | 251.2% (-12.1 to 1308.2%) | 152.1 (38.2–303.4)       | -23.7% (-81.4 to 211.6%) |                         |
|                                         | Multiple sclerosis                      |                     | 832 (544–1183)           | 699% (539.2 to 921.1%)    | 6.3 (4.3–8.6)            | -1.4% (-17.9 to 19.9%)   |                         |
|                                         | Migraine                                |                     | 60153 (11995–134011)     | 473% (424 to 588.1%)      | 535.6 (97.8–1203.7)      | -0.7% (-4.3 to 3.1%)     |                         |
|                                         | Tension-type headache                   |                     | 7426 (2396–20517)        | 542.2% (427.1 to 676.1%)  | 63.2 (20.7–187.8)        | 0% (-12.6 to 8.9%)       |                         |
|                                         | Motor neuron disease                    |                     | 63 (43–91)               | 472.1% (400 to 543.2%)    | 0.6 (0.4–0.8)            | -0.6% (-4.4 to 4.5%)     |                         |
|                                         | Other neurological disorders            |                     | 2834 (932–5379)          | 347.5% (39 to 1491.1%)    | 39.3 (12.8–76.3)         | 9.5% (-65.6 to 251.2%)   |                         |
|                                         | Headache disorders                      |                     | 67579 (17571–141865)     | 479.9% (432.5 to 583%)    | 598.8 (142.4–1275.1)     | -0.7% (-5 to 3%)         |                         |
|                                         | Meningitis                              |                     | 2295 (1582–3166)         | 86.1% (63.1 to 112.3%)    | 7.4 (5.2–10.2)           | -20% (-29.5 to -9.3%)    |                         |
|                                         | Encephalitis                            |                     | 1071 (745–1479)          | 187.7% (163.7 to 215.1%)  | 3.5 (2.5–4.8)            | 16.7% (8.3 to 26.2%)     |                         |

**Table S12** Burden, mortality, incidence, and prevalence of neurological conditions in North Africa and Middle East countries

| Measure     | Cause                        | Location                                | All Ages                 |                          | Age-standardised         |                          |
|-------------|------------------------------|-----------------------------------------|--------------------------|--------------------------|--------------------------|--------------------------|
|             |                              |                                         | Number                   | Percent change           | Rate per 100,000         | Percent change           |
|             |                              |                                         | 2019                     | From 1990 to 2019        | 2019                     | From 1990 to 2019        |
|             |                              | Mean (95% UI)                           | Mean (95% UI)            | Mean (95% UI)            | Mean (95% UI)            |                          |
| Afghanistan |                              | Tetanus                                 | 1 (1–3)                  | -64.9% (-87.5 to 3.4%)   | 0 (0–0)                  | -77.7% (-91.4 to -48.7%) |
|             |                              | Brain and central nervous system cancer | 272 (145–430)            | 191.3% (55 to 447.4%)    | 1.2 (0.7–1.9)            | 32.2% (-24.3 to 118.2%)  |
|             |                              | Stroke*                                 | 39779 (29049–50057)      | 175.4% (160.3 to 191.5%) | 249.6 (183.1–315.4)      | 1.2% (-4.2 to 7%)        |
|             |                              | Ischaemic stroke                        | 30505 (22098–38798)      | 216.5% (196.9 to 238.2%) | 202.9 (148.1–258.8)      | 15.1% (7.9 to 22.6%)     |
|             |                              | Intracerebral haemorrhage               | 7123 (5082–9074)         | 82% (63.7 to 101.4%)     | 36.7 (26.3–46.8)         | -37.2% (-42.9 to -30.4%) |
|             |                              | Subarachnoid haemorrhage                | 2151 (1490–2876)         | 140.2% (106.5 to 178.1%) | 10 (7–13.5)              | -16.6% (-28.6 to -3.4%)  |
|             |                              | Neurological disorders†                 | 238440 (80945–479466)    | 158.2% (97.3 to 245%)    | 887.5 (363.5–1694.8)     | -1.1% (-17.1 to 19.2%)   |
|             |                              | Alzheimer's disease and other dementias | 9054 (6367–12226)        | 195.2% (180.2 to 211.8%) | 109.2 (76.5–146.7)       | -2.6% (-7.1 to 2%)       |
|             |                              | Parkinson's disease                     | 1048 (702–1482)          | 204.1% (154 to 263.5%)   | 9 (6.2–12.4)             | 9.6% (-7.1 to 29.6%)     |
|             |                              | Idiopathic epilepsy                     | 25729 (5544–56291)       | 85.9% (-62.5 to 936.9%)  | 76.5 (16.8–162.9)        | -15.5% (-83.6 to 372.7%) |
|             |                              | Multiple sclerosis                      | 1351 (896–1903)          | 249.8% (197.8 to 314.9%) | 6.2 (4.1–8.6)            | 21.6% (4.4 to 42.9%)     |
|             |                              | Migraine                                | 175369 (26571–404422)    | 169% (158.9 to 186.6%)   | 596.7 (104.2–1356.8)     | 0.1% (-2.9 to 3.2%)      |
|             |                              | Tension-type headache                   | 17617 (5766–51725)       | 176.7% (140 to 209.4%)   | 66.1 (22.8–185.6)        | 0.6% (-11.1 to 9.8%)     |
|             |                              | Motor neuron disease                    | 100 (68–140)             | 153% (137.6 to 168.2%)   | 0.3 (0.2–0.5)            | -0.8% (-4.5 to 3.2%)     |
|             |                              | Other neurological disorders            | 8171 (2243–16997)        | 162.8% (-28.4 to 1089%)  | 23.5 (7.9–45.9)          | 20.8% (-61.6 to 293.2%)  |
|             |                              | Headache disorders                      | 192986 (40627–431548)    | 169.7% (159.4 to 187.2%) | 662.8 (157.9–1435.6)     | 0.1% (-3.4 to 3.6%)      |
|             |                              | Meningitis                              | 5811 (4106–7806)         | 108.3% (79.6 to 142.8%)  | 19.1 (13.9–25.3)         | -33.2% (-42 to -22.8%)   |
|             |                              | Encephalitis                            | 2459 (1749–3338)         | 288.8% (253.9 to 328.3%) | 7.5 (5.4–10.1)           | 12.6% (2.4 to 23.8%)     |
|             |                              | Tetanus                                 | 12 (6–19)                | -59.9% (-78.4 to -18.6%) | 0 (0–0.1)                | -82.7% (-89.1 to -70.5%) |
|             |                              | Brain and central nervous system cancer | 386 (195–728)            | 158.9% (67.4 to 354.3%)  | 1.5 (0.8–2.9)            | 2.9% (-32.8 to 63.2%)    |
|             |                              | Stroke*                                 | 41547 (30305–52032)      | 127.5% (113.7 to 141.6%) | 248.5 (183.7–312)        | 3.4% (-2.1 to 8.1%)      |
|             |                              | Ischaemic stroke                        | 29039 (21015–36955)      | 142.9% (123.4 to 161.9%) | 189.7 (139.8–240.7)      | 17.3% (9.8 to 23.9%)     |
|             |                              | Intracerebral haemorrhage               | 10209 (7293–13030)       | 87.6% (68.5 to 109.1%)   | 49.1 (35.3–62.2)         | -27.6% (-33.8 to -21.2%) |
|             |                              | Subarachnoid haemorrhage                | 2299 (1599–3105)         | 166.4% (129.5 to 213.7%) | 9.6 (6.7–12.9)           | -10.6% (-23.4 to 4.2%)   |
|             |                              | Neurological disorders†                 | 279547 (101550–560990)   | 224.6% (127.3 to 339.8%) | 896.8 (387.4–1711.2)     | -2.4% (-22.3 to 23.3%)   |
|             |                              | Alzheimer's disease and other dementias | 7490 (5271–10167)        | 54.5% (46.3 to 63.3%)    | 103.8 (73.3–140.2)       | -2.3% (-6.5 to 2.7%)     |
|             | Parkinson's disease          | 1059 (715–1488)                         | 63.8% (37.9 to 94.7%)    | 9.6 (6.5–13.3)           | -4.1% (-17.2 to 11.4%)   |                          |
|             | Idiopathic epilepsy          | 37823 (6439–83555)                      | 185.9% (-42 to 2058.3%)  | 92 (15.6–202.9)          | -16.3% (-83.1 to 512.7%) |                          |
|             | Multiple sclerosis           | 2557 (1653–3578)                        | 260.4% (199 to 333.6%)   | 10.8 (7.1–14.8)          | 17.9% (-1.6 to 41.8%)    |                          |
|             | Migraine                     | 198849 (30218–469528)                   | 244.1% (220.3 to 261.8%) | 587.4 (103–1342.7)       | -1.3% (-4.9 to 3.2%)     |                          |
|             | Tension-type headache        | 19586 (6272–57731)                      | 231.4% (191.2 to 263.2%) | 65.2 (22.1–183.3)        | -0.1% (-9.6 to 7.9%)     |                          |
|             | Motor neuron disease         | 138 (94–195)                            | 238.3% (219.8 to 260%)   | 0.4 (0.3–0.6)            | 0.2% (-4 to 4.2%)        |                          |
|             | Other neurological disorders | 12045 (2865–25726)                      | 308.4% (0 to 1736.2%)    | 27.6 (8.7–55.4)          | 20.4% (-63.8 to 330.8%)  |                          |
| Sudan       |                              | Headache disorders                      | 218435 (44781–493226)    | 242.9% (219.8 to 259.7%) | 652.5 (156.7–1422.4)     | -1.2% (-4.5 to 2.9%)     |
|             |                              | Meningitis                              | 1639 (1137–2271)         | -47.7% (-55 to -38.7%)   | 4.1 (2.8–5.5)            | -74.4% (-77.6 to -70.4%) |
|             |                              | Encephalitis                            | 1303 (908–1779)          | 114.1% (95.8 to 132.8%)  | 3.3 (2.3–4.5)            | 0.2% (-7.7 to 8.4%)      |
|             |                              | Tetanus                                 | 1 (1–2)                  | -76.4% (-90.3 to -41.6%) | 0 (0–0)                  | -83.6% (-92.6 to -68.2%) |
|             |                              | Brain and central nervous system cancer | 458 (246–701)            | 131.1% (10.5 to 404%)    | 1.4 (0.8–2.1)            | 25.8% (-31.3 to 129.2%)  |
|             |                              | Stroke*                                 | 60626 (43937–76264)      | 122.8% (111.4 to 134.4%) | 276.5 (201.3–351.5)      | 8.2% (2.6 to 13.3%)      |
|             |                              | Ischaemic stroke                        | 47279 (33937–60223)      | 150.9% (135.3 to 167.7%) | 226.9 (164.1–290.5)      | 22.6% (15.5 to 30.3%)    |
|             |                              | Intracerebral haemorrhage               | 10455 (7363–13471)       | 53.2% (37.9 to 69%)      | 39.7 (28.1–50.3)         | -32.1% (-38.3 to -25.6%) |
|             |                              | Subarachnoid haemorrhage                | 2893 (2009–3932)         | 87.6% (60.3 to 116.6%)   | 9.9 (6.9–13.3)           | -18.9% (-31.2 to -5.4%)  |
|             |                              | Neurological disorders†                 | 323508 (113529–649897)   | 118.3% (70.7 to 191.4%)  | 902.9 (375.3–1718.2)     | 0.3% (-16 to 24.4%)      |

**Table S12** Burden, mortality, incidence, and prevalence of neurological conditions in North Africa and Middle East countries

| Measure                          |                                         | All Ages                        |                                     | Age-standardised         |                                     |
|----------------------------------|-----------------------------------------|---------------------------------|-------------------------------------|--------------------------|-------------------------------------|
|                                  |                                         | Number<br>2019                  | Percent change<br>From 1990 to 2019 | Rate per 100,000<br>2019 | Percent change<br>From 1990 to 2019 |
| Cause                            | Location                                | Mean (95% UI)                   | Mean (95% UI)                       | Mean (95% UI)            | Mean (95% UI)                       |
|                                  | Alzheimer's disease and other dementias | 14276 (10170–19240)             | 115% (101·6 to 129·3%)              | 108·5 (76·5–145·8)       | -0·1% (-4·3 to 4·3%)                |
|                                  | Parkinson's disease                     | 1655 (1112–2320)                | 102·3% (69 to 143%)                 | 9·9 (6·8–14)             | 1·8% (-14·6 to 21·1%)               |
|                                  | Idiopathic epilepsy                     | 36309 (8020–79414)              | 84·4% (-56·9 to 958·2%)             | 84·3 (18·4–183·6)        | -5·1% (-77·8 to 449·1%)             |
|                                  | Multiple sclerosis                      | 1798 (1181–2524)                | 176·2% (132·5 to 220·5%)            | 6·1 (4·1–8·5)            | 22·1% (2·7 to 41·7%)                |
|                                  | Migraine                                | 234320 (36676–542009)           | 122·2% (114·9 to 132·9%)            | 601·9 (104·6–1369·5)     | -0·1% (-3·2 to 3·2%)                |
|                                  | Tension-type headache                   | 23633 (7813–69143)              | 125% (95·3 to 148·4%)               | 66·4 (23·2–189)          | 0·5% (-11·8 to 9·8%)                |
|                                  | Motor neuron disease                    | 135 (91–188)                    | 123·4% (113·4 to 134·2%)            | 0·4 (0·2–0·5)            | 4·1% (0·4 to 8·2%)                  |
|                                  | Other neurological disorders            | 11382 (3219–23893)              | 158·3% (-26·2 to 1024·1%)           | 25·4 (9–50·9)            | 31·9% (-56 to 326·6%)               |
|                                  | Headache disorders                      | 257953 (53961–578953)           | 122·5% (114·3 to 132·3%)            | 668·3 (155·5–1438·9)     | -0·1% (-3·7 to 3·7%)                |
| <b>YLLs (Years of Life Lost)</b> |                                         |                                 |                                     |                          |                                     |
| Global                           | Meningitis                              | 15649865 (13102961–18930650)    | -52·1% (-60·4 to -42·7%)            | 225 (187·3–273·1)        | -57·7% (-65 to -48·8%)              |
|                                  | Encephalitis                            | 4314970 (3623222–5928341)       | -46·2% (-58·5 to -17·4%)            | 59·2 (49·5–80·9)         | -55·9% (-65·7 to -33·2%)            |
|                                  | Tetanus                                 | 2314636 (1768800–3276980)       | -89·4% (-92·1 to -83·8%)            | 33·7 (25·6–47·8)         | -90·3% (-92·7 to -85·1%)            |
|                                  | Brain and central nervous system cancer | 8530468 (6625077–9447558)       | 39·7% (-13·7 to 66%)                | 107·4 (83·1–119)         | -10·8% (-43·7 to 4·8%)              |
|                                  | Stroke*                                 | 125490442 (116154749–134427938) | 27% (15·3 to 37·8%)                 | 1550 (1434·5–1660·7)     | -38% (-43·7 to -32·9%)              |
|                                  | Ischaemic stroke                        | 50349738 (46232449–54066668)    | 48·1% (32·3 to 61·3%)               | 636·5 (582–683·1)        | -33·4% (-40 to -27·6%)              |
|                                  | Intracerebral haemorrhage               | 65306215 (60073845–70392269)    | 24% (10·4 to 35·4%)                 | 793·4 (731·2–854·6)      | -37·4% (-44·2 to -31·5%)            |
|                                  | Subarachnoid haemorrhage                | 9834489 (8614600–11416373)      | -19·1% (-30·7 to 12·6%)             | 120·1 (105·5–139·2)      | -57% (-63·3 to -39·8%)              |
|                                  | Neurological disorders†                 | 32098442 (18750071–60829291)    | 81·3% (45 to 114·6%)                | 422·3 (243·2–806·2)      | -7·4% (-16·5 to 2%)                 |
|                                  | Alzheimer's disease and other dementias | 17859920 (4374613–47064787)     | 160·3% (145·7 to 181·7%)            | 239·8 (58·5–627·2)       | 2·9% (-1·5 to 9·8%)                 |
|                                  | Parkinson's disease                     | 5082522 (4673385–5409853)       | 123·5% (105·6 to 139·9%)            | 64·9 (59·6–69·2)         | -0·3% (-7·9 to 6·5%)                |
|                                  | Idiopathic epilepsy                     | 5336821 (4722718–6170046)       | -9·5% (-24·1 to 27·5%)              | 69·5 (61·7–80·6)         | -33·6% (-44 to -7·6%)               |
|                                  | Multiple sclerosis                      | 708628 (645137–897753)          | 53·2% (35·6 to 73·7%)               | 8·5 (7·7–10·7)           | -17·4% (-27·9 to -7·6%)             |
|                                  | Motor neuron disease                    | 977539 (926348–1025430)         | 65·5% (54·5 to 78·2%)               | 11·9 (11·3–12·5)         | -4·9% (-10·7 to 1·9%)               |
|                                  | Other neurological disorders            | 2133013 (1915236–2381088)       | 31·4% (16·2 to 49·6%)               | 27·7 (24·7–31)           | -8·9% (-19·1 to 3·5%)               |
| North Africa and Middle East     | Meningitis                              | 376540 (310241–457477)          | -72·5% (-79·3 to -64·6%)            | 64·1 (53–77·6)           | -77·2% (-82·4 to -70·9%)            |
|                                  | Encephalitis                            | 231250 (179810–314123)          | 9·8% (-25·4 to 58·2%)               | 38·8 (30·3–52·5)         | -21·8% (-45·9 to 9·5%)              |
|                                  | Tetanus                                 | 87385 (53584–139487)            | -85·8% (-92·9 to -68·7%)            | 15 (9·2–24·1)            | -88·2% (-93·9 to -76·1%)            |
|                                  | Brain and central nervous system cancer | 705624 (485965–836908)          | 69·9% (0·4 to 130·4%)               | 126·4 (86·6–149·3)       | -5·6% (-40·2 to 22·6%)              |
|                                  | Stroke*                                 | 6832264 (6014765–7787849)       | 34·5% (18 to 53·6%)                 | 1586·8 (1407–1782·8)     | -35·1% (-42·5 to -25·9%)            |
|                                  | Ischaemic stroke                        | 3874055 (3427786–4371090)       | 112·9% (77·1 to 146·1%)             | 987·9 (880·9–1105·9)     | -11·1% (-23·3 to 1·3%)              |
|                                  | Intracerebral haemorrhage               | 2520027 (2171781–2943061)       | 0·1% (-15·7 to 18·7%)               | 514 (447·9–593)          | -52·9% (-59·7 to -44·9%)            |
|                                  | Subarachnoid haemorrhage                | 438182 (355907–559639)          | -41% (-55·3 to 0·5%)                | 84·8 (69·4–107·1)        | -64·9% (-73·3 to -43·4%)            |
|                                  | Neurological disorders†                 | 1708193 (1049368–3130756)       | 68·3% (24·8 to 124·2%)              | 447·2 (241·7–897·3)      | -11·5% (-23·1 to 7·1%)              |
|                                  | Alzheimer's disease and other dementias | 855879 (207406–2304917)         | 173·2% (151·8 to 232·1%)            | 274·2 (67·3–727·7)       | -2·6% (-9·7 to 17·2%)               |



**Table S12** Burden, mortality, incidence, and prevalence of neurological conditions in North Africa and Middle East countries

|                                         |                                         | All Ages                 |                          | Age-standardised         |                          |
|-----------------------------------------|-----------------------------------------|--------------------------|--------------------------|--------------------------|--------------------------|
| Measure                                 | Location                                | Number                   | Percent change           | Rate per 100,000         | Percent change           |
|                                         |                                         | 2019                     | From 1990 to 2019        | 2019                     | From 1990 to 2019        |
| Cause                                   |                                         | Mean (95% UI)            | Mean (95% UI)            | Mean (95% UI)            | Mean (95% UI)            |
| Algeria                                 | Parkinson's disease                     | 256193 (225088–319531)   | 158.7% (125.3 to 202.8%) | 72.7 (63.9–91.5)         | -1% (-13.1 to 15.8%)     |
|                                         | Idiopathic epilepsy                     | 352158 (279073–412488)   | -18.1% (-37.2 to 39%)    | 57.3 (45.6–67.2)         | -44.4% (-55.6 to -11.7%) |
|                                         | Multiple sclerosis                      | 58198 (45154–80375)      | 126.5% (55.9 to 238%)    | 9.9 (7.8–13.6)           | 1.8% (-27.9 to 52.7%)    |
|                                         | Motor neuron disease                    | 38320 (30630–47074)      | 18.4% (-32.8 to 87.7%)   | 7.3 (5.8–9)              | -17.8% (-47.1 to 19.1%)  |
|                                         | Other neurological disorders            | 147446 (127889–171848)   | 28.8% (-3.1 to 67.3%)    | 25.7 (22.4–29.9)         | -9.5% (-30 to 15.6%)     |
|                                         | Meningitis                              | 13994 (11227–17746)      | -77.6% (-86.5 to -65%)   | 34.6 (27.8–43.5)         | -82.2% (-88.8 to -73.4%) |
|                                         | Encephalitis                            | 7133 (4745–13687)        | -9.7% (-47.2 to 43.8%)   | 17.3 (11.7–32.9)         | -32.4% (-58 to 3%)       |
|                                         | Tetanus                                 | 539 (393–942)            | -83% (-93.5 to -41.9%)   | 1.3 (0.9–2.3)            | -86.7% (-94.8 to -60.7%) |
|                                         | Brain and central nervous system cancer | 23311 (14132–29666)      | 55.2% (-17.1 to 119%)    | 57.4 (34.8–72.8)         | -6.6% (-50.2 to 27.9%)   |
|                                         | Stroke*                                 | 458921 (365717–567391)   | 37.9% (8.1 to 76.4%)     | 1512.6 (1223–1842.1)     | -47.8% (-58.8 to -34%)   |
|                                         | Ischaemic stroke                        | 302904 (238050–377992)   | 121.8% (69.2 to 188%)    | 1071 (848.5–1326.6)      | -27.8% (-43.4 to -9.4%)  |
|                                         | Intracerebral haemorrhage               | 131101 (101693–165721)   | -19.2% (-39.1 to 7.8%)   | 374.3 (293–473.1)        | -69% (-76.8 to -59.3%)   |
|                                         | Subarachnoid haemorrhage                | 24917 (18170–34201)      | -26.7% (-49.3 to 20.6%)  | 67.4 (49.6–90.1)         | -67.1% (-77.2 to -46.7%) |
|                                         | Bahrain                                 | Neurological disorders†  | 120531 (65613–244802)    | 76.5% (15.8 to 149.8%)   | 436.9 (213.5–944)        |
| Alzheimer's disease and other dementias |                                         | 68222 (16660–189706)     | 223.2% (150.9 to 312.3%) | 288.2 (70.3–791.7)       | -7.2% (-23.2 to 12.4%)   |
| Parkinson's disease                     |                                         | 18267 (14367–22680)      | 153.4% (90.7 to 234.1%)  | 67.5 (53.3–83.2)         | -21.4% (-39.6 to 2.4%)   |
| Idiopathic epilepsy                     |                                         | 21819 (16684–27174)      | -33.4% (-53.1 to 9%)     | 51.6 (39.6–64.2)         | -54.4% (-67.1 to -27.6%) |
| Multiple sclerosis                      |                                         | 3976 (1993–5812)         | 144.3% (39.6 to 288%)    | 9.3 (4.6–13.5)           | 0.1% (-42.7 to 55.6%)    |
| Motor neuron disease                    |                                         | 811 (613–1058)           | 123.9% (53.5 to 228.4%)  | 2 (1.5–2.7)              | -3% (-34.5 to 46.4%)     |
| Other neurological disorders            |                                         | 7435 (6159–8871)         | 43.2% (-7.6 to 100.8%)   | 18.3 (15.2–21.7)         | -5.3% (-35.7 to 28.1%)   |
| Meningitis                              |                                         | 150 (124–180)            | -54.4% (-66.4 to -39.6%) | 14.7 (12.2–17.6)         | -77.7% (-82.9 to -71.1%) |
| Encephalitis                            |                                         | 111 (87–140)             | 52.7% (9.2 to 97%)       | 9.5 (7.5–12)             | -28.6% (-48.3 to -9.3%)  |
| Tetanus                                 |                                         | 10 (8–14)                | 37.1% (-41 to 114.9%)    | 0.7 (0.6–1.2)            | -39.4% (-75 to -6.6%)    |
| Brain and central nervous system cancer |                                         | 1001 (606–1327)          | 183.3% (66.3 to 297.5%)  | 71.5 (45.8–91.6)         | -25.8% (-56.1 to 5.3%)   |
| Stroke*                                 |                                         | 5911 (4755–7465)         | 82.8% (42.3 to 141.6%)   | 767 (633.5–977.6)        | -56.1% (-65 to -45%)     |
| Ischaemic stroke                        |                                         | 2614 (2086–3342)         | 123.7% (71.8 to 193.8%)  | 473.6 (390–608.3)        | -47.7% (-58.7 to -35%)   |
| Intracerebral haemorrhage               |                                         | 2564 (2018–3270)         | 67.6% (24.5 to 126.6%)   | 238.4 (192.5–299.8)      | -65.9% (-74 to -55.4%)   |
| Subarachnoid haemorrhage                | 732 (537–1043)                          | 37.2% (-6.2 to 119.3%)   | 55 (41.9–77.4)           | -61% (-73 to -43.7%)     |                          |
| Egypt                                   | Neurological disorders†                 | 2810 (1778–5047)         | 177.7% (104.4 to 266.1%) | 464.1 (236.7–947.9)      | -14.5% (-29.9 to 1.7%)   |
|                                         | Alzheimer's disease and other dementias | 1202 (287–3440)          | 382.8% (289.1 to 512.1%) | 289.4 (70.1–764.3)       | -6.2% (-20.9 to 12.1%)   |
|                                         | Parkinson's disease                     | 368 (248–469)            | 266.9% (169.3 to 389.4%) | 75.5 (52.4–93.7)         | -16.7% (-37.1 to 7.3%)   |
|                                         | Idiopathic epilepsy                     | 785 (618–1037)           | 65% (28.5 to 120.6%)     | 61.4 (49.5–77.6)         | -39.1% (-52 to -18.5%)   |
|                                         | Multiple sclerosis                      | 78 (45–106)              | 412.5% (190.6 to 618.1%) | 4.1 (2.5–5.5)            | -7.1% (-44.4 to 28%)     |
|                                         | Motor neuron disease                    | 23 (18–29)               | 86% (35.2 to 150.7%)     | 1.5 (1.2–1.8)            | -62.5% (-71.9 to -50.5%) |
|                                         | Other neurological disorders            | 354 (295–429)            | 122.4% (70.4 to 191.1%)  | 32.2 (26.9–38.3)         | -6.8% (-26.3 to 19.5%)   |
|                                         | Meningitis                              | 48294 (31689–67133)      | -70.9% (-81.2 to -56.9%) | 47.7 (31.3–66.4)         | -77.7% (-85.5 to -67.2%) |
|                                         | Encephalitis                            | 61833 (29716–99309)      | -6.1% (-45.9 to 55.8%)   | 59.5 (29.6–95.5)         | -32.7% (-60.1 to 5.5%)   |
|                                         | Tetanus                                 | 7402 (2203–21951)        | -87.3% (-96.4 to -60.1%) | 7.7 (2.5–23.2)           | -90.8% (-97 to -71.7%)   |
|                                         | Brain and central nervous system cancer | 88019 (60623–123901)     | 72.8% (-6.2 to 152.9%)   | 97.6 (67.4–139.6)        | -2.2% (-41 to 39.4%)     |
|                                         | Stroke*                                 | 1300110 (960642–1749931) | -15.4% (-39.9 to 25.9%)  | 1855.4 (1367.5–2533.1)   | -39.7% (-55.1 to -19.7%) |
|                                         | Ischaemic stroke                        | 704099 (521871–961041)   | 86.9% (27.6 to 165.9%)   | 1141.7 (834.6–1566.8)    | 10.8% (-22 to 46%)       |
|                                         | Intracerebral haemorrhage               | 498924 (354451–683948)   | -38.6% (-58.8 to -8.7%)  | 608 (426.1–849.3)        | -60.8% (-72 to -46%)     |
| Subarachnoid haemorrhage                | 97087 (67306–137958)                    | -72% (-84.1 to -33.8%)   | 105.7 (74.2–149.7)       | -78.7% (-86.7 to -53.8%) |                          |

**Table S12** Burden, mortality, incidence, and prevalence of neurological conditions in North Africa and Middle East countries

| Measure                                 |                                         | All Ages                                |                          | Age-standardised         |                          |                        |
|-----------------------------------------|-----------------------------------------|-----------------------------------------|--------------------------|--------------------------|--------------------------|------------------------|
|                                         |                                         | Number                                  | Percent change           | Rate per 100,000         | Percent change           |                        |
| Cause                                   | Location                                | 2019                                    | From 1990 to 2019        | 2019                     | From 1990 to 2019        |                        |
|                                         |                                         | Mean (95% UI)                           | Mean (95% UI)            | Mean (95% UI)            | Mean (95% UI)            |                        |
| Iran (Islamic Republic of)              | Neurological disorders†                 | 198502 (115959–369299)                  | 80.9% (36.9 to 132.9%)   | 405.1 (199.8–823.1)      | -1.6% (-20.5 to 23.9%)   |                        |
|                                         | Alzheimer's disease and other dementias | 94371 (21935–259421)                    | 109.5% (67.1 to 173.8%)  | 252.4 (56.8–672.4)       | -1.7% (-19.3 to 25.3%)   |                        |
|                                         | Parkinson's disease                     | 41977 (31577–61942)                     | 133.4% (80.9 to 196%)    | 86.6 (65.3–130.4)        | 11.1% (-12.2 to 39.4%)   |                        |
|                                         | Idiopathic epilepsy                     | 24374 (16027–36689)                     | -8.4% (-35.4 to 47.7%)   | 24 (16.1–35.9)           | -42.9% (-59 to -10.4%)   |                        |
|                                         | Multiple sclerosis                      | 9543 (4393–30024)                       | 73.8% (-47.9 to 495.6%)  | 9.7 (4.7–26.4)           | -1.1% (-64.7 to 191.7%)  |                        |
|                                         | Motor neuron disease                    | 6029 (3334–9618)                        | 237.5% (78.8 to 465.4%)  | 7.5 (4.1–11.9)           | 76.4% (-5.4 to 195.5%)   |                        |
|                                         | Other neurological disorders            | 22208 (14954–31604)                     | 73.1% (17 to 150.5%)     | 24.8 (16.8–35.2)         | 19.9% (-17.1 to 65.9%)   |                        |
|                                         | Meningitis                              | 24175 (21013–27651)                     | -82.4% (-87 to -76.1%)   | 31.7 (27.2–36.5)         | -82.1% (-86.5 to -75.8%) |                        |
|                                         | Encephalitis                            | 10246 (7698–12077)                      | -21.1% (-45.2 to 8.7%)   | 13.5 (9.8–16.2)          | -24.4% (-45.9 to 0.9%)   |                        |
|                                         | Tetanus                                 | 910 (692–1253)                          | -94.4% (-97.6 to -82.2%) | 1.2 (0.9–1.7)            | -94.1% (-97.4 to -82.4%) |                        |
|                                         | Brain and central nervous system cancer | 126167 (66631–150728)                   | 39.2% (-28.5 to 80%)     | 153.5 (80.7–183.6)       | -11.4% (-50.6 to 7.8%)   |                        |
|                                         | Stroke*                                 | 736731 (679915–781711)                  | 38.6% (23 to 55.4%)      | 1065.8 (976.7–1134.4)    | -49.2% (-54.5 to -41.4%) |                        |
|                                         | Ischaemic stroke                        | 543997 (496639–578722)                  | 58.8% (39.2 to 79.3%)    | 815.3 (737.4–870.1)      | -46.6% (-52.8 to -38%)   |                        |
|                                         | Intracerebral haemorrhage               | 156169 (147538–165405)                  | 2% (-11 to 15.5%)        | 203.3 (190.9–215.2)      | -55.6% (-61.9 to -49.2%) |                        |
|                                         | Subarachnoid haemorrhage                | 36565 (32315–43627)                     | 2.8% (-24.5 to 62.9%)    | 47.2 (41.9–54.8)         | -59% (-71.2 to -34.3%)   |                        |
|                                         | Iraq                                    | Neurological disorders†                 | 270143 (147800–532947)   | 93.5% (24.4 to 184.4%)   | 418.4 (213.6–866.4)      | -11.4% (-24.7 to 14%)  |
|                                         |                                         | Alzheimer's disease and other dementias | 160837 (38235–426338)    | 309.6% (265.3 to 447.6%) | 272.1 (66.1–723)         | -0.9% (-7.7 to 32%)    |
| Parkinson's disease                     |                                         | 40712 (34551–44885)                     | 253% (199.1 to 325.2%)   | 64.8 (55.1–71.4)         | 1.4% (-17.1 to 21.9%)    |                        |
| Idiopathic epilepsy                     |                                         | 33416 (30081–39269)                     | -53.1% (-65.8 to -19.2%) | 40.2 (36–47.4)           | -59% (-69.4 to -34.5%)   |                        |
| Multiple sclerosis                      |                                         | 14945 (12308–21975)                     | 152.2% (86.7 to 244.2%)  | 16.2 (13.4–23.5)         | 5.1% (-26.7 to 48.4%)    |                        |
| Motor neuron disease                    |                                         | 3291 (2875–3758)                        | 191.4% (89.1 to 307.9%)  | 4.1 (3.6–4.7)            | 51.5% (0.1 to 113.1%)    |                        |
| Other neurological disorders            |                                         | 16942 (15688–18168)                     | 61.1% (18.9 to 116.6%)   | 21.1 (19.4–22.6)         | 20.8% (-8.5 to 62.8%)    |                        |
| Meningitis                              |                                         | 25931 (19826–33764)                     | -71.8% (-80.9 to -58.8%) | 61.6 (47.4–78.2)         | -81.3% (-86.9 to -73.7%) |                        |
| Encephalitis                            |                                         | 29074 (19822–39114)                     | 15.1% (-30.7 to 86.4%)   | 67.4 (47–89)             | -34.7% (-58.1 to -2.2%)  |                        |
| Tetanus                                 |                                         | 1781 (1012–3002)                        | -91.2% (-97.3 to -53.5%) | 4 (2.3–6.7)              | -93.8% (-98 to -72.8%)   |                        |
| Brain and central nervous system cancer |                                         | 78832 (57161–101955)                    | 162.9% (31.3 to 323.7%)  | 222.7 (161.1–285.4)      | 14.7% (-39.3 to 78.9%)   |                        |
| Stroke*                                 |                                         | 604499 (471681–745962)                  | 112.7% (62.5 to 175.2%)  | 2616.5 (2102.7–3132.9)   | -20.5% (-38.2 to 0%)     |                        |
| Ischaemic stroke                        |                                         | 312868 (249314–376904)                  | 151.1% (90.4 to 223.9%)  | 1579.4 (1289–1862.9)     | -7.1% (-28.1 to 17.2%)   |                        |
| Intracerebral haemorrhage               |                                         | 272077 (207250–348016)                  | 97.1% (48 to 165.7%)     | 973.6 (760.3–1219.7)     | -30.5% (-48 to -8.6%)    |                        |
| Subarachnoid haemorrhage                |                                         | 19554 (13921–27517)                     | -9.4% (-42.4 to 54.8%)   | 63.4 (45.7–89.1)         | -66.5% (-79.1 to -42.8%) |                        |
| Jordan                                  |                                         | Neurological disorders†                 | 84150 (50537–154877)     | 103% (54 to 160.3%)      | 418.7 (207.7–864.7)      | -5.2% (-22.9 to 15.3%) |
|                                         |                                         | Alzheimer's disease and other dementias | 40853 (9715–107617)      | 153.1% (109.1 to 209.2%) | 271.4 (64.8–723.4)       | 0.3% (-16 to 21.3%)    |
|                                         | Parkinson's disease                     | 12901 (10288–18484)                     | 210.7% (139.7 to 303.4%) | 75.1 (60.6–104.5)        | 19.2% (-7.3 to 53.8%)    |                        |
|                                         | Idiopathic epilepsy                     | 16599 (12416–21675)                     | 10.7% (-22.1 to 78.1%)   | 38.7 (29.1–50.1)         | -49.1% (-63.3 to -22.8%) |                        |
|                                         | Multiple sclerosis                      | 1573 (1093–2283)                        | 219.6% (103.3 to 437.3%) | 4.7 (3.2–6.7)            | 0.8% (-35.9 to 66.6%)    |                        |
|                                         | Motor neuron disease                    | 422 (306–573)                           | 197.8% (78.6 to 360.2%)  | 1.3 (0.9–1.8)            | 14.2% (-35.6 to 91%)     |                        |
|                                         | Other neurological disorders            | 11802 (8983–14891)                      | 113.1% (48.2 to 236.7%)  | 27.5 (21.2–34.5)         | 6% (-24.3 to 66.1%)      |                        |
|                                         | Meningitis                              | 4932 (3860–6486)                        | -6.7% (-36.5 to 38.4%)   | 44 (34.6–57.4)           | -60.4% (-71.9 to -42.9%) |                        |
|                                         | Encephalitis                            | 906 (661–1303)                          | -18.6% (-52.9 to 144.1%) | 7.8 (5.8–11.4)           | -67.4% (-80.4 to -9.5%)  |                        |
|                                         | Tetanus                                 | 118 (87–174)                            | -71.8% (-86.8 to -12.3%) | 1 (0.7–1.5)              | -85.7% (-93.3 to -59%)   |                        |
|                                         | Brain and central nervous system cancer | 9563 (6825–11843)                       | 199.4% (90 to 306%)      | 96.1 (68.3–118.7)        | -10.9% (-44.2 to 21.4%)  |                        |
|                                         | Stroke*                                 | 65603 (54338–78113)                     | 111.1% (67.1 to 162%)    | 1163.5 (954.9–1374.6)    | -54.1% (-63.2 to -43.8%) |                        |



**Table S12** Burden, mortality, incidence, and prevalence of neurological conditions in North Africa and Middle East countries

| Measure                      | Cause                                   | Location         | All Ages                 |                          | Age-standardised         |                          |
|------------------------------|-----------------------------------------|------------------|--------------------------|--------------------------|--------------------------|--------------------------|
|                              |                                         |                  | Number                   | Percent change           | Rate per 100,000         | Percent change           |
|                              |                                         |                  | 2019                     | From 1990 to 2019        | 2019                     | From 1990 to 2019        |
|                              |                                         | Mean (95% UI)    | Mean (95% UI)            | Mean (95% UI)            | Mean (95% UI)            |                          |
| Kuwait                       | Ischaemic stroke                        |                  | 43269 (35599–51125)      | 136.7% (84.1 to 191.8%)  | 840.5 (689.2–990.8)      | -50.6% (-61.4 to -39.3%) |
|                              | Intracerebral haemorrhage               |                  | 20109 (16625–24114)      | 73.5% (36.2 to 118.7%)   | 294.9 (244.2–353)        | -61.7% (-69.8 to -52%)   |
|                              | Subarachnoid haemorrhage                |                  | 2224 (1725–2759)         | 84.9% (27.4 to 189.2%)   | 28.1 (20.8–34.8)         | -57.8% (-71 to -34.1%)   |
|                              | Neurological disorders†                 |                  | 20443 (12115–38987)      | 234.3% (153 to 323.6%)   | 384 (185–824.8)          | -12.8% (-28.2 to 7.1%)   |
|                              | Alzheimer's disease and other dementias |                  | 10349 (2456–28594)       | 367.9% (287.4 to 478.3%) | 258.1 (63–715.8)         | -7.7% (-22.3 to 14.6%)   |
|                              | Parkinson's disease                     |                  | 2934 (2457–3511)         | 321.2% (232.5 to 428.2%) | 63.3 (52.9–75.2)         | -16.4% (-33.5 to 4.8%)   |
|                              | Idiopathic epilepsy                     |                  | 3660 (2795–4476)         | 85.1% (36.2 to 165.2%)   | 30.9 (23.6–37.7)         | -40.4% (-55.1 to -15%)   |
|                              | Multiple sclerosis                      |                  | 706 (422–922)            | 297% (146 to 459%)       | 6.9 (4.3–8.9)            | -15.7% (-45.8 to 17.1%)  |
|                              | Motor neuron disease                    |                  | 273 (202–379)            | 493.6% (282.5 to 804.1%) | 2.6 (2–3.6)              | 45.7% (-6.6 to 129.7%)   |
|                              | Other neurological disorders            |                  | 2522 (2050–3103)         | 150.6% (78.6 to 250.6%)  | 22.1 (18–27.1)           | -4.5% (-29.8 to 29.7%)   |
|                              | Meningitis                              |                  | 589 (460–747)            | -33.4% (-51.4 to -11.7%) | 16.5 (12.7–21.1)         | -67% (-75.7 to -56.6%)   |
|                              | Encephalitis                            |                  | 321 (260–422)            | 38.3% (9.1 to 81%)       | 8.8 (7.1–11.4)           | -30.4% (-44.7 to -10.3%) |
|                              | Tetanus                                 |                  | 1 (0–3)                  | 84.7% (-77.8 to 686.7%)  | 0 (0–0.1)                | -47.7% (-91 to 74.2%)    |
|                              | Brain and central nervous system cancer |                  | 2405 (1687–3006)         | 134.1% (43.7 to 198.9%)  | 64.3 (45.7–80.2)         | -10% (-45.1 to 14.8%)    |
|                              | Stroke*                                 |                  | 19183 (15796–23106)      | 224.1% (165.5 to 293.9%) | 749 (616.5–896.1)        | -12.8% (-27.8 to 5.7%)   |
|                              | Ischaemic stroke                        |                  | 10550 (8664–12861)       | 246.8% (184.7 to 326.6%) | 492.2 (402.7–595.2)      | -13.3% (-28.9 to 5.9%)   |
|                              | Intracerebral haemorrhage               |                  | 7371 (5899–8995)         | 254.6% (175.8 to 343.4%) | 220.2 (175.7–269.5)      | -4% (-25.4 to 20.7%)     |
|                              | Subarachnoid haemorrhage                |                  | 1262 (1010–1605)         | 58% (17.6 to 159%)       | 36.6 (29.5–46.1)         | -41% (-55.4 to -13.9%)   |
|                              | Neurological disorders†                 |                  | 8076 (4291–16107)        | 165.2% (85.4 to 248.6%)  | 378.8 (172.1–818.2)      | -15.4% (-30.9 to -2.5%)  |
|                              | Alzheimer's disease and other dementias |                  | 4815 (1207–12607)        | 379.4% (320.7 to 456.3%) | 271 (67.9–731)           | -3.9% (-15.3 to 10%)     |
| Parkinson's disease          |                                         | 820 (675–986)    | 202.2% (154.4 to 263%)   | 46 (37.5–55.1)           | -29.8% (-40.8 to -16.3%) |                          |
| Idiopathic epilepsy          |                                         | 1457 (1202–1833) | 38.3% (14.1 to 78.1%)    | 35.5 (29.4–43.8)         | -37.1% (-47.8 to -20.3%) |                          |
| Multiple sclerosis           |                                         | 193 (145–275)    | 282.6% (188.1 to 408.8%) | 3.9 (2.9–5.5)            | -1.4% (-26.3 to 31.7%)   |                          |
| Motor neuron disease         |                                         | 178 (124–227)    | -23.4% (-47.6 to 7.8%)   | 5.3 (3.7–6.8)            | -64.4% (-75.2 to -50.4%) |                          |
| Other neurological disorders |                                         | 613 (499–758)    | 41.3% (4.8 to 85.4%)     | 17.1 (13.7–21.3)         | -31.5% (-48.1 to -10.8%) |                          |
| Lebanon                      | Meningitis                              |                  | 1231 (870–1677)          | -64.2% (-77 to -45.1%)   | 23.8 (16.8–32.5)         | -72.3% (-81.8 to -59.2%) |
|                              | Encephalitis                            |                  | 706 (422–1379)           | 8.8% (-34.1 to 66.7%)    | 13.7 (8.2–26.8)          | -19.5% (-48.9 to 19.7%)  |
|                              | Tetanus                                 |                  | 766 (166–2656)           | -57.9% (-93 to 27.8%)    | 14.9 (3.2–50.9)          | -75.8% (-95.7 to -29.1%) |
|                              | Brain and central nervous system cancer |                  | 5929 (4138–7638)         | 57.1% (5.6 to 115.1%)    | 114.1 (80.2–146.9)       | -10.5% (-39.7 to 21.6%)  |
|                              | Stroke*                                 |                  | 27417 (19332–35906)      | 45.3% (2.7 to 96.7%)     | 528.3 (372.5–692.1)      | -42.3% (-59.3 to -21.3%) |
|                              | Ischaemic stroke                        |                  | 21101 (14261–27359)      | 116.3% (46.7 to 187%)    | 407.8 (275.3–528.6)      | -22.7% (-46.2 to 3.1%)   |
|                              | Intracerebral haemorrhage               |                  | 5430 (3796–7649)         | -27.2% (-50.1 to 4.9%)   | 103.7 (72.5–145.4)       | -67.9% (-77.7 to -53.8%) |
|                              | Subarachnoid haemorrhage                |                  | 887 (503–1337)           | -46.5% (-73.5 to -0.1%)  | 16.8 (9.5–25.3)          | -73.7% (-87.1 to -50.4%) |
|                              | Neurological disorders†                 |                  | 21112 (10304–45979)      | 130.7% (67.3 to 224.2%)  | 417.9 (201.9–909.6)      | -9.8% (-26.4 to 24.9%)   |
|                              | Alzheimer's disease and other dementias |                  | 14005 (3289–38760)       | 201.8% (146.8 to 347.3%) | 281.8 (67.2–770.7)       | -4.4% (-20.7 to 40.6%)   |
|                              | Parkinson's disease                     |                  | 3093 (2474–4206)         | 135.7% (69.9 to 219.5%)  | 58.7 (46.9–79.9)         | -17.4% (-40.2 to 11.5%)  |
|                              | Idiopathic epilepsy                     |                  | 2148 (1537–2988)         | -7.7% (-34.7 to 38.7%)   | 41.5 (29.8–57.5)         | -39.6% (-56.7 to -9.9%)  |
|                              | Multiple sclerosis                      |                  | 531 (274–778)            | 116% (38.7 to 240.2%)    | 9.9 (5.1–14.5)           | 7.4% (-32 to 68.3%)      |
|                              | Motor neuron disease                    |                  | 138 (81–227)             | 96.5% (12.6 to 215.5%)   | 2.7 (1.6–4.4)            | 4.9% (-40.2 to 68.1%)    |
|                              | Other neurological disorders            |                  | 1197 (865–1618)          | 115.2% (50 to 201.4%)    | 23.4 (16.9–31.7)         | 37.4% (-3.3 to 90.7%)    |
| Libya                        | Meningitis                              |                  | 1837 (1380–2396)         | -72.1% (-81.8 to -58.5%) | 31.2 (23.6–40.4)         | -72.9% (-81.3 to -61.5%) |
|                              | Encephalitis                            |                  | 872 (571–1766)           | -4.4% (-39.8 to 44.2%)   | 15.2 (9.9–29.6)          | -15.9% (-43 to 23.6%)    |
|                              | Tetanus                                 |                  | 66 (44–116)              | -69.7% (-88.1 to -8.1%)  | 1.2 (0.7–2)              | -70.5% (-89.8 to -19%)   |

**Table S12** Burden, mortality, incidence, and prevalence of neurological conditions in North Africa and Middle East countries

| Measure<br>Cause                        |                                         | All Ages                 |                          | Age-standardised         |                          |
|-----------------------------------------|-----------------------------------------|--------------------------|--------------------------|--------------------------|--------------------------|
|                                         |                                         | Number                   | Percent change           | Rate per 100,000         | Percent change           |
|                                         |                                         | 2019                     | From 1990 to 2019        | 2019                     | From 1990 to 2019        |
| Location                                | Mean (95% UI)                           | Mean (95% UI)            | Mean (95% UI)            | Mean (95% UI)            |                          |
| Morocco                                 | Brain and central nervous system cancer | 8520 (6244–11164)        | 70.9% (15.5 to 160.1%)   | 132.5 (97.6–173.2)       | -5% (-32.8 to 36.5%)     |
|                                         | Stroke*                                 | 68578 (51189–90565)      | 39.1% (0.8 to 99.7%)     | 1322.4 (1000.5–1742.3)   | -25.6% (-43.4 to 0.2%)   |
|                                         | Ischaemic stroke                        | 44157 (32728–59668)      | 152.8% (85.7 to 252.6%)  | 912.8 (682.1–1217.5)     | 9% (-17.8 to 46.7%)      |
|                                         | Intracerebral haemorrhage               | 20726 (15025–28745)      | -6.5% (-34.2 to 39.9%)   | 347.2 (254–476.4)        | -52.7% (-65.3 to -34.7%) |
|                                         | Subarachnoid haemorrhage                | 3696 (2486–5548)         | -61.8% (-77.8 to -10.3%) | 62.4 (42.4–92.6)         | -69.6% (-80.3 to -45.5%) |
|                                         | Neurological disorders†                 | 21901 (11896–42823)      | 102% (46.8 to 168.6%)    | 473.7 (234.6–985.4)      | -4.9% (-24.5 to 21%)     |
|                                         | Alzheimer's disease and other dementias | 12239 (2972–33364)       | 159.2% (106.9 to 231.1%) | 305.3 (74.8–829.1)       | -5% (-23.6 to 21.6%)     |
|                                         | Parkinson's disease                     | 3163 (2321–4165)         | 206.1% (123.4 to 324.3%) | 73 (53.5–95.8)           | 10.7% (-18.9 to 51.8%)   |
|                                         | Idiopathic epilepsy                     | 3777 (2759–5119)         | -5.7% (-33.4 to 41.7%)   | 55.4 (39.9–75.2)         | -32.9% (-50.9 to -3.5%)  |
|                                         | Multiple sclerosis                      | 836 (411–1423)           | 276.4% (125.3 to 571%)   | 11.3 (5.5–19)            | 39.3% (-20 to 143.8%)    |
|                                         | Motor neuron disease                    | 209 (115–327)            | 260% (70.3 to 566.3%)    | 3.2 (1.8–4.9)            | 50.1% (-29.3 to 183.3%)  |
|                                         | Other neurological disorders            | 1677 (1252–2176)         | 109.8% (36 to 234.8%)    | 25.6 (19.3–33.1)         | 39.9% (-6.8 to 117.6%)   |
|                                         | Meningitis                              | 19636 (13062–27667)      | -84.5% (-90.6 to -76%)   | 61.6 (40.9–87.5)         | -83.3% (-89.8 to -74.7%) |
|                                         | Encephalitis                            | 7434 (4105–15000)        | -11.2% (-49.8 to 40.9%)  | 22.9 (12.6–45.6)         | -18.4% (-51.2 to 26.5%)  |
|                                         | Tetanus                                 | 7666 (1913–28936)        | -95% (-98.8 to -80.8%)   | 25.7 (6.3–98.1)          | -93.9% (-98.5 to -76.2%) |
|                                         | Brain and central nervous system cancer | 19397 (12986–26757)      | 56.4% (-9.8 to 133.7%)   | 54.6 (36.9–73.8)         | 2.3% (-37.4 to 47.3%)    |
|                                         | Stroke*                                 | 581054 (451454–721688)   | 66.8% (27.8 to 110.2%)   | 1992.7 (1584.1–2446.6)   | -19.4% (-37.5 to 0.5%)   |
|                                         | Ischaemic stroke                        | 381444 (298001–470143)   | 172.2% (101.8 to 245.1%) | 1380.6 (1094.3–1686.2)   | 19.5% (-9.3 to 48%)      |
|                                         | Intracerebral haemorrhage               | 169997 (126492–220310)   | 1.6% (-27.3 to 38.3%)    | 521.4 (392.9–671)        | -52% (-65.3 to -34.6%)   |
| Subarachnoid haemorrhage                | 29612 (19446–45136)                     | -27.5% (-51.9 to 25.2%)  | 90.6 (61–134.7)          | -60.6% (-74.2 to -30.8%) |                          |
| Neurological disorders†                 | 108631 (55917–219853)                   | 107.6% (62.2 to 147%)    | 430.1 (205.5–908.5)      | 3.7% (-13.6 to 22%)      |                          |
| Alzheimer's disease and other dementias | 61451 (13881–170845)                    | 147.5% (105.1 to 196.1%) | 274.9 (62.5–760.6)       | 0.5% (-15.5 to 18.8%)    |                          |
| Parkinson's disease                     | 22310 (17671–26335)                     | 228.2% (160.1 to 323.9%) | 86.1 (69–100.3)          | 42.6% (14 to 83.9%)      |                          |
| Idiopathic epilepsy                     | 14226 (5014–37834)                      | -5.2% (-40 to 50.5%)     | 39.2 (13.8–104.9)        | -30.8% (-54.5 to 4.4%)   |                          |
| Multiple sclerosis                      | 3584 (1808–5653)                        | 151.9% (53.5 to 315.9%)  | 9.7 (4.9–15.2)           | 26.3% (-22 to 105.7%)    |                          |
| Motor neuron disease                    | 720 (505–991)                           | 158.1% (67.8 to 277.2%)  | 2 (1.4–2.7)              | 30.1% (-17.5 to 90.3%)   |                          |
| Other neurological disorders            | 6339 (4554–8577)                        | 58.9% (12.2 to 128.7%)   | 18.2 (13.1–24.5)         | 21.5% (-12.2 to 69.2%)   |                          |
| Palestine                               | Meningitis                              | 1624 (1290–2076)         | -79% (-86.9 to -66.3%)   | 32.8 (26.9–40)           | -85% (-89.8 to -77.9%)   |
|                                         | Encephalitis                            | 622 (448–937)            | 33.7% (-22 to 111.2%)    | 12.1 (9.1–17.7)          | -26.7% (-52.2 to 5.4%)   |
|                                         | Tetanus                                 | 71 (51–106)              | -90.5% (-97.4 to -52.6%) | 1.3 (0.9–1.9)            | -92.7% (-98 to -67.8%)   |
|                                         | Brain and central nervous system cancer | 8782 (6846–10894)        | 113.7% (30.7 to 199.1%)  | 228.8 (173.5–275.6)      | -9.4% (-40.1 to 23.6%)   |
|                                         | Stroke*                                 | 38561 (33005–43892)      | 54% (18.4 to 97.9%)      | 1890.3 (1632.7–2140.5)   | -35% (-49.6 to -16.4%)   |
|                                         | Ischaemic stroke                        | 26078 (22065–29807)      | 92.3% (46.2 to 150%)     | 1387.8 (1182.5–1583.7)   | -19.8% (-38 to 3.7%)     |
|                                         | Intracerebral haemorrhage               | 11325 (9548–13292)       | 7% (-18.3 to 42.8%)      | 462 (389.4–544)          | -57.7% (-67.7 to -43.6%) |
|                                         | Subarachnoid haemorrhage                | 1157 (941–1393)          | 29% (-10.1 to 98.3%)     | 40.6 (33–48.7)           | -51% (-66.6 to -25.4%)   |
|                                         | Neurological disorders†                 | 10435 (7161–18412)       | 78.8% (37.8 to 135.8%)   | 460.6 (252.7–984.1)      | -12.5% (-30.3 to 10.9%)  |
|                                         | Alzheimer's disease and other dementias | 4139 (955–11921)         | 111.9% (74 to 165.2%)    | 276.4 (63.8–791.3)       | -6.6% (-22.5 to 16.2%)   |
|                                         | Parkinson's disease                     | 1396 (932–1626)          | 123.3% (67.5 to 219.4%)  | 82.1 (54.5–95.3)         | -5.7% (-29.1 to 33.6%)   |
|                                         | Idiopathic epilepsy                     | 3522 (2976–4335)         | 36.1% (-0.9 to 123%)     | 71.6 (60.9–86.9)         | -36.9% (-52.6 to -3.6%)  |
|                                         | Multiple sclerosis                      | 340 (259–458)            | 216.9% (81.8 to 464.4%)  | 9 (6.9–12.8)             | 0% (-39.5 to 73.8%)      |
|                                         | Motor neuron disease                    | 59 (47–74)               | 239% (117.3 to 435.5%)   | 1.5 (1.2–1.9)            | 45.5% (-11.5 to 143.9%)  |
|                                         | Other neurological disorders            | 979 (804–1191)           | 79.5% (13.7 to 211.1%)   | 20 (16.6–23.7)           | -0.7% (-33.2 to 67.7%)   |

**Table S12** Burden, mortality, incidence, and prevalence of neurological conditions in North Africa and Middle East countries

| Measure      |                                         | All Ages               |                           | Age-standardised       |                          |
|--------------|-----------------------------------------|------------------------|---------------------------|------------------------|--------------------------|
|              |                                         | Number                 | Percent change            | Rate per 100,000       | Percent change           |
| Cause        | Location                                | 2019                   | From 1990 to 2019         | 2019                   | From 1990 to 2019        |
|              |                                         | Mean (95% UI)          | Mean (95% UI)             | Mean (95% UI)          | Mean (95% UI)            |
| Oman         | Meningitis                              | 637 (532–797)          | -66% (-76.5 to -49.6%)    | 22.9 (19.3–27.9)       | -74.9% (-81.3 to -64.3%) |
|              | Encephalitis                            | 4369 (3162–7628)       | 6.2% (-33 to 66.1%)       | 119.1 (91.1–177.2)     | -44.5% (-63 to -14.1%)   |
|              | Tetanus                                 | 40 (32–50)             | -79.7% (-93.8 to -19.4%)  | 1 (0.7–1.3)            | -90.3% (-96.7 to -62.2%) |
|              | Brain and central nervous system cancer | 2460 (1421–3200)       | 148% (25.1 to 276.2%)     | 71 (42.8–89.6)         | 9.7% (-45.2 to 63.5%)    |
|              | Stroke*                                 | 25335 (21843–30592)    | 13.8% (-13.2 to 53.4%)    | 1647.1 (1439.9–1874.5) | -41.5% (-55 to -21.9%)   |
|              | Ischaemic stroke                        | 13115 (11032–15498)    | 61.9% (19.4 to 124.2%)    | 1093.5 (932.1–1272.3)  | -20.6% (-39.3 to 8.4%)   |
|              | Intracerebral haemorrhage               | 9838 (8377–12433)      | -7.1% (-29.6 to 28.1%)    | 473 (407.1–592.1)      | -60.9% (-70.6 to -47.4%) |
|              | Subarachnoid haemorrhage                | 2383 (1623–3970)       | -33.3% (-61.6 to 47.5%)   | 80.6 (51.4–125.1)      | -64.4% (-79 to -30.7%)   |
|              | Neurological disorders†                 | 5047 (3089–9368)       | 118.9% (77.3 to 181.2%)   | 462.8 (225.9–999.7)    | 1.4% (-15.7 to 39.5%)    |
|              | Alzheimer's disease and other dementias | 2406 (559–6695)        | 121.4% (82.1 to 204.3%)   | 308.6 (71–852.2)       | -4.7% (-21.2 to 39.9%)   |
|              | Parkinson's disease                     | 899 (595–1047)         | 160.2% (84 to 258.2%)     | 109.7 (65–128.8)       | 30.8% (-5.2 to 77%)      |
|              | Idiopathic epilepsy                     | 655 (527–911)          | 29.1% (-13.6 to 138.5%)   | 15 (12.4–19.6)         | -43.2% (-60.6 to -5.2%)  |
|              | Multiple sclerosis                      | 336 (159–518)          | 258.7% (74.9 to 559.7%)   | 8.2 (3.9–13.5)         | 10.8% (-46.2 to 103.4%)  |
|              | Motor neuron disease                    | 76 (46–106)            | 218.5% (67.6 to 419.9%)   | 2.7 (1.4–3.9)          | 20.7% (-36.9 to 109.9%)  |
|              | Other neurological disorders            | 676 (545–813)          | 171.9% (63.8 to 318.8%)   | 18.7 (15–22.9)         | 45.4% (-9.7 to 120.5%)   |
| Qatar        | Meningitis                              | 280 (212–367)          | -17.1% (-48.5 to 28.8%)   | 17.5 (13.4–22.3)       | -79.3% (-86.8 to -69.8%) |
|              | Encephalitis                            | 237 (169–351)          | 238.1% (108.4 to 412.1%)  | 11.9 (8.7–16.3)        | -31.3% (-56.3 to 1.4%)   |
|              | Tetanus                                 | 17 (13–23)             | 195.1% (8.3 to 463.4%)    | 0.7 (0.5–1)            | -50.2% (-83.3 to 5%)     |
|              | Brain and central nervous system cancer | 1643 (1097–2724)       | 422.6% (204.5 to 702.6%)  | 83.1 (59.5–125.1)      | -21.6% (-53.8 to 18.8%)  |
|              | Stroke*                                 | 5899 (4347–7879)       | 187.7% (103.6 to 298.9%)  | 722.3 (572.2–941)      | -48.2% (-62 to -31%)     |
|              | Ischaemic stroke                        | 1687 (1251–2371)       | 199% (99 to 324.1%)       | 433.9 (344.6–570.4)    | -38.7% (-55.7 to -18%)   |
|              | Intracerebral haemorrhage               | 2850 (2061–3897)       | 174.5% (83.4 to 292.8%)   | 215 (165.9–284.7)      | -58.4% (-70.5 to -42.9%) |
|              | Subarachnoid haemorrhage                | 1362 (958–1847)        | 203.9% (73.8 to 389.9%)   | 73.4 (53.3–97.8)       | -56.9% (-74.6 to -27.3%) |
|              | Neurological disorders†                 | 2441 (1551–4070)       | 370.4% (237.2 to 547.8%)  | 482.8 (243.5–1022.1)   | 0.2% (-21.4 to 25.4%)    |
|              | Alzheimer's disease and other dementias | 865 (194–2513)         | 586.4% (396.5 to 851.4%)  | 296.7 (70.2–820.8)     | 3.7% (-16.9 to 28.2%)    |
|              | Parkinson's disease                     | 377 (251–523)          | 463.5% (290.7 to 692.3%)  | 132.3 (80.5–177.6)     | 14.4% (-14.8 to 53.3%)   |
|              | Idiopathic epilepsy                     | 617 (465–845)          | 237% (146.6 to 406.7%)    | 22.6 (17.5–30)         | -45.8% (-59.9 to -19.9%) |
|              | Multiple sclerosis                      | 75 (51–112)            | 594.9% (327.6 to 922.8%)  | 2.7 (1.9–3.7)          | -18.7% (-49.7 to 21.5%)  |
|              | Motor neuron disease                    | 30 (21–41)             | 612.3% (342.6 to 1009.8%) | 1.5 (1.1–2.1)          | -7.9% (-45.3 to 50.3%)   |
|              | Other neurological disorders            | 478 (362–650)          | 273.2% (153.8 to 481.7%)  | 27 (20.7–35.8)         | -18.7% (-43.7 to 23.2%)  |
| Saudi Arabia | Meningitis                              | 7453 (5506–10113)      | -46.8% (-61.4 to -25%)    | 23.7 (18.4–30.4)       | -75.2% (-81.4 to -65.4%) |
|              | Encephalitis                            | 8782 (6507–11985)      | -2.1% (-33.1 to 48%)      | 26.4 (19.8–35.6)       | -54.5% (-69.8 to -31%)   |
|              | Tetanus                                 | 749 (245–1293)         | -94.2% (-99.2 to -68.2%)  | 2.1 (0.8–3.5)          | -96.5% (-99.4 to -81.2%) |
|              | Brain and central nervous system cancer | 25834 (18794–38905)    | 245.2% (88.5 to 548.5%)   | 77.6 (57.8–117.9)      | 30.4% (-30.5 to 145.4%)  |
|              | Stroke*                                 | 348685 (259472–437865) | 116.2% (51.2 to 209.1%)   | 1815.5 (1408.2–2165.5) | -32.8% (-51 to -7.4%)    |
|              | Ischaemic stroke                        | 163122 (119550–201296) | 136.7% (62.8 to 229.7%)   | 1078.7 (809.9–1276.7)  | -21.7% (-43 to 4.6%)     |
|              | Intracerebral haemorrhage               | 171876 (126809–221167) | 106.7% (41 to 213.9%)     | 695.8 (533.8–855.4)    | -43.4% (-60.1 to -16%)   |
|              | Subarachnoid haemorrhage                | 13687 (9191–19190)     | 48% (-17.9 to 162%)       | 41 (28.5–55.1)         | -57% (-76.5 to -24.9%)   |
|              | Neurological disorders†                 | 72163 (48100–118902)   | 115% (55.8 to 200.1%)     | 479.1 (260.8–954.7)    | -5.6% (-25.5 to 29.5%)   |
|              | Alzheimer's disease and other dementias | 23419 (5586–63721)     | 120.5% (73.4 to 215.2%)   | 280.3 (67–747.3)       | -3.2% (-21.1 to 39.5%)   |
|              | Parkinson's disease                     | 9658 (7640–11493)      | 133% (72.6 to 247.2%)     | 96.2 (69.4–113.5)      | -1.5% (-25 to 46.7%)     |
|              | Idiopathic epilepsy                     | 29806 (21684–41678)    | 108.2% (24 to 251.9%)     | 73.8 (55.9–100.8)      | -19.6% (-51.6 to 32.3%)  |
|              | Multiple sclerosis                      | 1717 (1153–2595)       | 365.1% (151.5 to 1122.9%) | 4.3 (3–6.2)            | 19.2% (-34.5 to 205.4%)  |

**Table S12** Burden, mortality, incidence, and prevalence of neurological conditions in North Africa and Middle East countries

| Measure                                 |                                         | All Ages                |                          | Age-standardised      |                          |
|-----------------------------------------|-----------------------------------------|-------------------------|--------------------------|-----------------------|--------------------------|
|                                         |                                         | Number                  | Percent change           | Rate per 100,000      | Percent change           |
| Cause                                   | Location                                | 2019                    | From 1990 to 2019        | 2019                  | From 1990 to 2019        |
|                                         |                                         | Mean (95% UI)           | Mean (95% UI)            | Mean (95% UI)         | Mean (95% UI)            |
| Syrian Arab Republic                    | Motor neuron disease                    | 744 (495–1102)          | 247.2% (68.1 to 594.8%)  | 2.6 (1.8–3.7)         | 22.5% (-40.3 to 166.4%)  |
|                                         | Other neurological disorders            | 6819 (5187–9015)        | 74.6% (5.7 to 198.8%)    | 22 (17.5–27.6)        | -3.2% (-39.1 to 61.5%)   |
|                                         | Meningitis                              | 12273 (9255–15997)      | -81.4% (-87.6 to -72.5%) | 91.8 (68.7–121)       | -72% (-80.9 to -59.6%)   |
|                                         | Encephalitis                            | 3164 (2336–4375)        | -57.2% (-74.4 to -20.4%) | 23.7 (17.6–33)        | -44.1% (-65.5 to -0.8%)  |
|                                         | Tetanus                                 | 307 (169–626)           | -97.6% (-99.2 to -89.5%) | 2.4 (1.3–5)           | -95.6% (-98.6 to -81.4%) |
|                                         | Brain and central nervous system cancer | 20098 (14445–27220)     | 33.6% (-23.6 to 106.3%)  | 142.6 (103–191.1)     | -7.3% (-38.8 to 36.5%)   |
|                                         | Stroke*                                 | 208285 (157650–274015)  | -11.7% (-36 to 23.3%)    | 1784 (1385.4–2304.3)  | -42.5% (-58.2 to -20.6%) |
|                                         | Ischaemic stroke                        | 93713 (70730–121893)    | 34.6% (-5 to 89.5%)      | 887.1 (687–1136.2)    | -27.8% (-49.7 to -0.9%)  |
|                                         | Intracerebral haemorrhage               | 100600 (75708–135767)   | -13.1% (-38.9 to 24.2%)  | 796.9 (605.4–1057.1)  | -49.2% (-63.8 to -28.7%) |
|                                         | Subarachnoid haemorrhage                | 13972 (10358–17842)     | -72.3% (-82 to -52.7%)   | 100 (75.4–126)        | -67.5% (-77.7 to -49.3%) |
|                                         | Neurological disorders†                 | 36742 (18448–76713)     | 62% (10.4 to 128.3%)     | 410.7 (188.7–907.5)   | 0.5% (-23.9 to 36.2%)    |
|                                         | Alzheimer's disease and other dementias | 21880 (4846–61900)      | 113% (60.9 to 198.9%)    | 280.2 (65.9–791)      | 4% (-19.1 to 47.9%)      |
|                                         | Parkinson's disease                     | 6589 (4310–8576)        | 157.3% (86.7 to 255.3%)  | 72.5 (47.6–93.1)      | 14.2% (-15.7 to 56.3%)   |
|                                         | Idiopathic epilepsy                     | 4249 (3218–5691)        | -25.6% (-49.9 to 35.1%)  | 29.3 (22.2–39)        | -37.3% (-56.7 to 10.3%)  |
|                                         | Tunisia                                 | Multiple sclerosis      | 642 (441–882)            | 104.2% (23 to 241.6%) | 4.4 (3–6)                |
| Motor neuron disease                    |                                         | 346 (204–566)           | 138.8% (32.1 to 304.8%)  | 2.3 (1.4–3.8)         | 31.1% (-26.3 to 121.1%)  |
| Other neurological disorders            |                                         | 3035 (2315–3951)        | -17.4% (-46.6 to 33.4%)  | 22 (16.8–28.7)        | -4.7% (-35 to 50.1%)     |
| Meningitis                              |                                         | 3291 (2322–4396)        | -79.9% (-87.6 to -68.2%) | 31.3 (21.8–41.7)      | -80% (-87.5 to -69.4%)   |
| Encephalitis                            |                                         | 1616 (974–3338)         | -25.7% (-57.6 to 15.8%)  | 15.4 (9.1–31.5)       | -31.5% (-59.2 to 5.4%)   |
| Tetanus                                 |                                         | 106 (70–195)            | -83.7% (-94 to -56.6%)   | 1 (0.7–1.8)           | -83.8% (-94 to -57.1%)   |
| Brain and central nervous system cancer |                                         | 4979 (3286–6824)        | 42.9% (-16.3 to 111%)    | 41 (27–56)            | -6.3% (-42.7 to 36.2%)   |
| Stroke*                                 |                                         | 151958 (112873–200799)  | 73.3% (26.9 to 133.5%)   | 1278.1 (957.8–1669)   | -28.9% (-48 to -4.6%)    |
| Ischaemic stroke                        |                                         | 106821 (79854–140307)   | 175.1% (94.2 to 273.1%)  | 919.3 (689.9–1202.8)  | 0.9% (-28 to 35.7%)      |
| Intracerebral haemorrhage               |                                         | 38206 (27649–51027)     | -1.2% (-31.3 to 40%)     | 303.9 (221.8–403.7)   | -58% (-70.6 to -40%)     |
| Subarachnoid haemorrhage                |                                         | 6932 (4647–9826)        | -32% (-58.1 to 19.4%)    | 54.9 (37–77)          | -66.3% (-79.7 to -41.1%) |
| Neurological disorders†                 |                                         | 45075 (20976–96180)     | 103.5% (31.5 to 186.1%)  | 416.5 (189.5–892.1)   | -9.4% (-31.7 to 20.7%)   |
| Alzheimer's disease and other dementias |                                         | 29927 (7064–79849)      | 208.9% (135.9 to 338.8%) | 285.2 (67–745.2)      | -3.3% (-25 to 34.3%)     |
| Parkinson's disease                     |                                         | 6947 (5059–9387)        | 206.4% (125 to 308.2%)   | 61.4 (44.9–82.7)      | 10.6% (-18.1 to 45.8%)   |
| Idiopathic epilepsy                     |                                         | 4677 (3260–6549)        | -42.6% (-62.6 to -8.6%)  | 41.2 (28.8–57.6)      | -50.9% (-67.6 to -23.8%) |
| Türkiye                                 | Multiple sclerosis                      | 1255 (641–1900)         | 150.6% (52.4 to 321.6%)  | 9.5 (4.8–14.4)        | 23.7% (-25.4 to 102.9%)  |
|                                         | Motor neuron disease                    | 275 (181–402)           | 135.3% (34.9 to 295.4%)  | 2.1 (1.4–3)           | 19.7% (-31.3 to 104%)    |
|                                         | Other neurological disorders            | 1994 (1435–2726)        | 40% (-9.2 to 106.1%)     | 17.1 (12.3–23.3)      | 8.7% (-28.7 to 55.2%)    |
|                                         | Meningitis                              | 15983 (13179–19410)     | -91.4% (-94.7 to -86.4%) | 24.4 (20–30.4)        | -90.3% (-94.1 to -85%)   |
|                                         | Encephalitis                            | 10569 (8148–13138)      | -50.2% (-70.5 to -21.4%) | 15.6 (11.8–19.6)      | -51.4% (-70.6 to -23.6%) |
|                                         | Tetanus                                 | 710 (542–960)           | -98% (-98.9 to -94.1%)   | 1 (0.8–1.4)           | -98.3% (-99 to -95.6%)   |
|                                         | Brain and central nervous system cancer | 130370 (62327–180115)   | 23.2% (-35.1 to 91.7%)   | 155.2 (75.2–211.6)    | -21.2% (-55.8 to 17.8%)  |
|                                         | Stroke*                                 | 825066 (660411–1008282) | 70.3% (22.4 to 119.6%)   | 971.3 (778.9–1182.1)  | -25.9% (-46.7 to -4.8%)  |
|                                         | Ischaemic stroke                        | 424464 (337531–519987)  | 138.3% (59.8 to 211.6%)  | 516.9 (411.8–632.2)   | -8.6% (-38.7 to 19.9%)   |
|                                         | Intracerebral haemorrhage               | 320059 (253584–397583)  | 34.2% (-3.3 to 74.6%)    | 364.9 (289.8–451.6)   | -38.3% (-56.1 to -20.1%) |
|                                         | Subarachnoid haemorrhage                | 80543 (61565–103081)    | 18.9% (-27.9 to 116.3%)  | 89.5 (69.3–113.8)     | -41.8% (-64.7 to 8.3%)   |
|                                         | Neurological disorders†                 | 398180 (225184–780441)  | 30.7% (-14.4 to 93.1%)   | 511 (293.3–978.2)     | -22.8% (-39.9 to -2%)    |
|                                         | Alzheimer's disease and other dementias | 220938 (55718–628880)   | 175.4% (126 to 237.4%)   | 278.5 (70.2–786.3)    | -4.3% (-21.4 to 16.6%)   |

**Table S12** Burden, mortality, incidence, and prevalence of neurological conditions in North Africa and Middle East countries

| Measure                                 |                                         | All Ages                |                            | Age-standardised         |                          |
|-----------------------------------------|-----------------------------------------|-------------------------|----------------------------|--------------------------|--------------------------|
|                                         |                                         | Number                  | Percent change             | Rate per 100,000         | Percent change           |
| Cause                                   | Location                                | 2019                    | From 1990 to 2019          | 2019                     | From 1990 to 2019        |
|                                         |                                         | Mean (95% UI)           | Mean (95% UI)              | Mean (95% UI)            | Mean (95% UI)            |
| United Arab Emirates                    | Parkinson's disease                     | 51886 (39341–96417)     | 136.8% (82.2 to 201%)      | 63.8 (48.4–119.1)        | -12.3% (-31.8 to 10.9%)  |
|                                         | Idiopathic epilepsy                     | 60568 (50170–72791)     | -48.2% (-64.1 to 6.5%)     | 82.5 (67.7–98.8)         | -51.1% (-66.2 to -1.7%)  |
|                                         | Multiple sclerosis                      | 7654 (5547–11248)       | 30.3% (-42.8 to 137.8%)    | 8.5 (5.9–13.9)           | -27% (-62.8 to 40.7%)    |
|                                         | Motor neuron disease                    | 22902 (17977–28750)     | -15.7% (-55.2 to 50.7%)    | 31 (23.8–39.6)           | -25.6% (-58.5 to 21.2%)  |
|                                         | Other neurological disorders            | 34231 (27915–41914)     | -34.8% (-54.1 to -5.4%)    | 46.7 (38.8–56.7)         | -38.7% (-56.1 to -12.2%) |
|                                         | Meningitis                              | 2532 (1538–3785)        | 16.6% (-31.4 to 70.4%)     | 28.5 (19–40.4)           | -75.9% (-83.4 to -67.4%) |
|                                         | Encephalitis                            | 1309 (721–2801)         | 204.8% (88.7 to 370.6%)    | 16.8 (10.4–32)           | -22.3% (-48.1 to 16.4%)  |
|                                         | Tetanus                                 | 1059 (485–1741)         | -8% (-83.2 to 209.2%)      | 33.2 (8.4–54.9)          | -86% (-96.4 to -46.5%)   |
|                                         | Brain and central nervous system cancer | 14149 (8124–20956)      | 459.7% (269.5 to 712.1%)   | 149.4 (90.4–203.9)       | -11% (-45.5 to 29.8%)    |
|                                         | Stroke*                                 | 76743 (52969–110388)    | 376.4% (212.6 to 600.9%)   | 1589.3 (1200–2106.9)     | -50.2% (-63.3 to -33.3%) |
|                                         | Ischaemic stroke                        | 39999 (27917–55080)     | 582.3% (344.3 to 936.2%)   | 1125.8 (857.3–1440)      | -38.6% (-54.7 to -17.6%) |
|                                         | Intracerebral haemorrhage               | 31773 (20820–50238)     | 281.6% (130.5 to 495.2%)   | 411.1 (282.8–629.3)      | -65.7% (-77.3 to -50.2%) |
|                                         | Subarachnoid haemorrhage                | 4972 (2324–8880)        | 158.9% (42.8 to 384.3%)    | 52.3 (24.9–85.9)         | -67.3% (-80 to -45.5%)   |
|                                         | Yemen                                   | Neurological disorders† | 20257 (13568–29820)        | 482.3% (297.7 to 728.9%) | 515.1 (295.4–990.3)      |
| Alzheimer's disease and other dementias |                                         | 3053 (668–8893)         | 606.8% (406.4 to 889.8%)   | 262.4 (62.9–724.5)       | -7.2% (-22.3 to 25.2%)   |
| Parkinson's disease                     |                                         | 2422 (1594–3367)        | 687.2% (456.3 to 1074.3%)  | 114.3 (70.7–151)         | -13% (-33.7 to 23.8%)    |
| Idiopathic epilepsy                     |                                         | 7030 (4322–10921)       | 257.4% (124.3 to 474.8%)   | 64.2 (41.6–96.7)         | -36.9% (-57.1 to -3.7%)  |
| Multiple sclerosis                      |                                         | 1995 (912–3569)         | 1081.6% (551.8 to 1757.5%) | 14.3 (6–26.2)            | 31% (-26.2 to 94.8%)     |
| Motor neuron disease                    |                                         | 498 (196–1005)          | 1091.1% (375.2 to 2343.4%) | 5.3 (2–10.6)             | 24.9% (-47.6 to 142.8%)  |
| Other neurological disorders            |                                         | 5260 (3193–7965)        | 836.4% (460 to 1357.3%)    | 54.5 (33.9–79.3)         | 52.7% (-2.2 to 120.7%)   |
| Meningitis                              |                                         | 30814 (20053–46016)     | -57.8% (-73.6 to -32.2%)   | 90 (61.5–129.3)          | -70% (-80.1 to -55.4%)   |
| Encephalitis                            |                                         | 10340 (5678–20479)      | 45.6% (-19.9 to 167.3%)    | 27.8 (16.2–54.6)         | -9.4% (-46.2 to 51.2%)   |
| Tetanus                                 |                                         | 4194 (1661–8779)        | -85.7% (-95.7 to -34.5%)   | 11.2 (5–23.3)            | -89.9% (-96.5 to -61.6%) |
| Brain and central nervous system cancer |                                         | 31328 (18560–46009)     | 136.6% (23.5 to 365.2%)    | 122.1 (74.2–179.5)       | 15% (-36 to 99.4%)       |
| Stroke*                                 |                                         | 348708 (262489–463408)  | 81.9% (35.4 to 149.9%)     | 2515.8 (1917–3278.3)     | -26.4% (-43.7 to -2.2%)  |
| Ischaemic stroke                        |                                         | 181690 (139380–241207)  | 234.9% (150.9 to 360%)     | 1513.8 (1168.7–2002)     | 20.4% (-6.8 to 57.4%)    |
| Intracerebral haemorrhage               |                                         | 139561 (101599–188052)  | 23% (-12.1 to 75.9%)       | 847.6 (623.1–1140.1)     | -54.2% (-66.6 to -36.7%) |
| Subarachnoid haemorrhage                | 27457 (13469–46026)                     | 14.3% (-25.3 to 99.8%)  | 154.5 (76.3–264)           | -50.2% (-65.3 to -20.4%) |                          |
| Afghanistan                             | Neurological disorders†                 | 59917 (37226–106735)    | 79% (15.7 to 196.2%)       | 437 (215.1–925.6)        | -5.7% (-25.8 to 23%)     |
|                                         | Alzheimer's disease and other dementias | 22724 (5231–64624)      | 204.8% (151 to 283.8%)     | 274.5 (63.9–761.5)       | 0.5% (-15.7 to 23.6%)    |
|                                         | Parkinson's disease                     | 7114 (5460–9661)        | 218.6% (142.5 to 341.6%)   | 67.7 (52.8–89.4)         | 16.4% (-9.6 to 55.9%)    |
|                                         | Idiopathic epilepsy                     | 23811 (15415–33812)     | 12.4% (-28.4 to 172.2%)    | 71.1 (46.5–100.1)        | -36.9% (-58.2 to 23.2%)  |
|                                         | Multiple sclerosis                      | 1745 (778–3095)         | 281.2% (93.8 to 661.2%)    | 7.9 (3.8–12.8)           | 30.5% (-29.5 to 133.4%)  |
|                                         | Motor neuron disease                    | 296 (206–417)           | 214.8% (96.5 to 413.9%)    | 1.4 (1–2.1)              | 26.1% (-27.5 to 120.6%)  |
|                                         | Other neurological disorders            | 4227 (2849–6124)        | 106% (15.6 to 271.1%)      | 14.4 (10.1–20.4)         | 19% (-25.5 to 104.8%)    |
|                                         | Meningitis                              | 115469 (82285–166403)   | -32.8% (-56.4 to 4.7%)     | 225.5 (164.4–306.1)      | -74.9% (-83.5 to -63.5%) |
|                                         | Encephalitis                            | 57729 (36789–113537)    | 153.3% (68.1 to 262.9%)    | 168.2 (124.6–241.3)      | -15.1% (-39.9 to 17.6%)  |
|                                         | Tetanus                                 | 58099 (32883–101635)    | -74.6% (-88.5 to -32.2%)   | 113.9 (70.4–179.3)       | -90.2% (-94.9 to -79.6%) |
|                                         | Brain and central nervous system cancer | 54143 (28875–95299)     | 152.6% (56.9 to 371.5%)    | 174.6 (98.6–321.4)       | -5.9% (-38.6 to 55.9%)   |
|                                         | Stroke*                                 | 466290 (332486–617437)  | 52% (14.2 to 96.2%)        | 3249.7 (2264.5–4235.5)   | -23.2% (-41.6 to -4%)    |
|                                         | Ischaemic stroke                        | 195531 (141603–268203)  | 134.5% (74.8 to 207.3%)    | 1675.8 (1191.4–2257.4)   | 28.6% (-2.2 to 64.4%)    |
|                                         | Intracerebral haemorrhage               | 231694 (166235–313924)  | 21.1% (-10 to 64.3%)       | 1348.6 (941.2–1813.7)    | -46.5% (-60 to -29.7%)   |



**Table S12** Burden, mortality, incidence, and prevalence of neurological conditions in North Africa and Middle East countries

| Measure                      |                                         | All Ages                |                          | Age-standardised        |                          |
|------------------------------|-----------------------------------------|-------------------------|--------------------------|-------------------------|--------------------------|
|                              |                                         | Number                  | Percent change           | Rate per 100,000        | Percent change           |
|                              |                                         | 2019                    | From 1990 to 2019        | 2019                    | From 1990 to 2019        |
| Cause                        | Location                                | Mean (95% UI)           | Mean (95% UI)            | Mean (95% UI)           | Mean (95% UI)            |
| Sudan                        | Subarachnoid haemorrhage                | 39065 (11765–68601)     | 22.2% (-15.8 to 93.1%)   | 225.4 (67.3–391.3)      | -44.6% (-61 to -14.5%)   |
|                              | Neurological disorders†                 | 103133 (67039–153499)   | 61% (24.8 to 135.6%)     | 606.2 (341.8–1162.2)    | -19.5% (-37.6 to 2.3%)   |
|                              | Alzheimer's disease and other dementias | 23448 (5538–64822)      | 52% (22.7 to 79.9%)      | 328.9 (79.5–892.5)      | -4.1% (-20.5 to 10.9%)   |
|                              | Parkinson's disease                     | 10515 (7840–13740)      | 51.5% (14.8 to 96.2%)    | 104.2 (79.3–133.3)      | -6.2% (-27.4 to 18.8%)   |
|                              | Idiopathic epilepsy                     | 56218 (28474–79484)     | 52.8% (5.4 to 208.8%)    | 132.6 (65.9–185.9)      | -48.4% (-61.9 to -8.1%)  |
|                              | Multiple sclerosis                      | 4019 (1431–9775)        | 224.7% (96.9 to 486.4%)  | 16.3 (6.7–36.8)         | 6.8% (-31.4 to 74.9%)    |
|                              | Motor neuron disease                    | 490 (353–677)           | 126.7% (53.4 to 236.3%)  | 2.2 (1.5–3.2)           | -8.2% (-39.2 to 41.1%)   |
|                              | Other neurological disorders            | 8443 (5904–11671)       | 146.6% (63.7 to 282.3%)  | 22 (16.4–30.1)          | -8.4% (-35.7 to 34%)     |
|                              | Meningitis                              | 45033 (29393–69598)     | -80.4% (-87.9 to -69.3%) | 96.3 (64.8–140.3)       | -85.3% (-90.4 to -77.7%) |
|                              | Encephalitis                            | 13643 (7364–25877)      | 10.8% (-42.9 to 121.2%)  | 28.8 (16.4–54.8)        | -24% (-57.6 to 34.5%)    |
|                              | Tetanus                                 | 2684 (1120–5577)        | -92.9% (-97.4 to -77.6%) | 5.6 (2.6–12.1)          | -94.3% (-97.8 to -83.9%) |
|                              | Brain and central nervous system cancer | 47975 (28840–70549)     | 69.9% (-20.1 to 292.2%)  | 134.4 (83.4–194.7)      | -1.7% (-49 to 87.2%)     |
|                              | Stroke*                                 | 461786 (328962–661040)  | 14.7% (-15.3 to 52.6%)   | 2309 (1690.7–3286.2)    | -35.9% (-49.3 to -18.7%) |
|                              | Ischaemic stroke                        | 256894 (187194–378036)  | 102.5% (50.2 to 167.8%)  | 1465.8 (1081.7–2132.7)  | 6.2% (-16.1 to 35.3%)    |
|                              | Intracerebral haemorrhage               | 175218 (115804–250413)  | -22.8% (-45.8 to 6.5%)   | 730.2 (488.8–1029)      | -61.5% (-71.1 to -48.6%) |
|                              | Subarachnoid haemorrhage                | 29674 (15608–52961)     | -39.2% (-59.5 to 28.9%)  | 113 (60.8–198.4)        | -65.4% (-76.4 to -33.3%) |
|                              | Neurological disorders††                | 96769 (60909–163156)    | 21.2% (-24.2 to 109.6%)  | 451 (240.8–919.7)       | -19% (-40.9 to 5.1%)     |
|                              | Alzheimer's disease and other dementias | 33865 (7813–93233)      | 105.1% (77.7 to 146.5%)  | 257 (59.6–730.3)        | -5.5% (-17.2 to 11.7%)   |
|                              | Parkinson's disease                     | 11583 (8809–15062)      | 79.3% (32.6 to 148%)     | 75.6 (58.5–96.3)        | -5% (-29.6 to 30.5%)     |
|                              | Idiopathic epilepsy                     | 38387 (24060–53514)     | -24.7% (-56 to 107.4%)   | 84.4 (54.1–116.2)       | -52.9% (-71.8 to 6%)     |
| Multiple sclerosis           | 2397 (981–4083)                         | 175.4% (41.8 to 425.8%) | 7.9 (3.5–12.6)           | 18.8% (-35.9 to 113.6%) |                          |
| Motor neuron disease         | 472 (328–674)                           | 143.8% (50.9 to 286.3%) | 1.7 (1.1–2.5)            | 20.5% (-28 to 97.1%)    |                          |
| Other neurological disorders | 10089 (6343–15109)                      | 108.2% (7.4 to 272.2%)  | 24.3 (15.7–35.3)         | 34.3% (-24.9 to 114.5%) |                          |

Data in parentheses are 95% uncertainty intervals. Percentage data are rounded to one decimal place. Percentages and number of DALYs, YLDs, YLLs, deaths, incident cases, and prevalent cases are not mutually exclusive: the sum of percentages and number of DALYs, YLDs, YLLs, deaths, incident cases, and prevalent cases in the columns exceeds the totals for all causes combined because of overlap between various causes. Measures with insufficient data are not reported here. DALYs, Disability-Adjusted Life Years; UI, uncertainty interval; YLDs, Years Lived with Disability; YLLs, Years of Life Lost; \* Stroke include ischaemic stroke, intracerebral haemorrhage, and subarachnoid haemorrhage; † Neurological disorders include Alzheimer's disease and other dementias, Parkinson's disease, idiopathic epilepsy, multiple sclerosis, headache disorders (including migraine and tension-type headache), motor neuron disease, and other neurological disorders.

***Table S13 Disability, prevalence, and incidence of head and spinal injuries in North Africa and Middle East countries***

(NEXT PAGE)



**Table S13** Disability, prevalence, and incidence of head and spinal injuries in North Africa and Middle East countries

| Location                                  |                              | All Ages                  |                          | Age-standardised  |                         |                          |      |    |
|-------------------------------------------|------------------------------|---------------------------|--------------------------|-------------------|-------------------------|--------------------------|------|----|
|                                           |                              | Number                    | Percent change           | Rate per 100,000  | Percent change          |                          |      |    |
| Cause                                     | Measure                      | 2019                      | From 1990 to 2019        | 2019              | From 1990 to 2019       |                          |      |    |
|                                           |                              | Mean (95% UI)             | Mean (95% UI)            | Rank              | Mean (95% UI)           | Mean (95% UI)            | Rank |    |
| <b>YLDs (Years Lived with Disability)</b> |                              |                           |                          |                   |                         |                          |      |    |
| Minor TBI                                 | Global                       | 1366897 (963637–1833553)  | 70.5% (66.9 to 74%)      |                   | 16.9 (11.9–22.7)        | -4.4% (-5.7 to -3%)      |      |    |
|                                           | North Africa and Middle East | 86593 (60649–118700)      | 120.2% (98.7 to 134.7%)  |                   | 15.4 (10.9–21)          | 0.7% (-9.4 to 7.1%)      |      |    |
|                                           | Algeria                      | 4727 (3343–6407)          | 109.1% (84.5 to 139.4%)  | 5                 | 11.8 (8.3–15.9)         | -6.5% (-16.2 to 5.3%)    |      | 8  |
|                                           | Bahrain                      | 182 (123–251)             | 316.5% (261.9 to 381%)   | 18                | 11.1 (7.6–15.1)         | 3.4% (-7.8 to 14.9%)     |      | 13 |
|                                           | Egypt                        | 7891 (5463–10815)         | 112.3% (86.8 to 142%)    | 7                 | 9.4 (6.5–12.8)          | 7.1% (-4.7 to 20.2%)     |      | 15 |
|                                           | Iran (Islamic Republic of)   | 11129 (8111–14902)        | 33.6% (11.9 to 54.5%)    | 2                 | 12.9 (9.5–17.3)         | -37.8% (-52.2 to -27%)   |      | 2  |
|                                           | Iraq                         | 10092 (6104–16454)        | 115.5% (87.6 to 148.7%)  | 10                | 28.7 (17.4–47.3)        | -26.7% (-39.5 to -12.7%) |      | 3  |
|                                           | Jordan                       | 947 (643–1309)            | 282.4% (236.3 to 331.8%) | 15                | 9.5 (6.5–13)            | -2.8% (-12.4 to 7.4%)    |      | 10 |
|                                           | Kuwait                       | 581 (408–794)             | 135% (70.4 to 199.6%)    | 11                | 12.8 (9–17.3)           | -20.7% (-37.8 to -5.4%)  |      | 4  |
|                                           | Lebanon                      | 866 (558–1434)            | 10.6% (-10.9 to 43.9%)   | 1                 | 16.4 (10.5–27.1)        | -40.7% (-52.2 to -24.1%) |      | 1  |
|                                           | Libya                        | 1159 (809–1627)           | 201% (154.1 to 259.1%)   | 13                | 16.9 (11.8–23.5)        | 29.7% (10 to 56.5%)      |      | 19 |
|                                           | Morocco                      | 4180 (2899–5741)          | 79.8% (60.4 to 99.3%)    | 3                 | 11.9 (8.2–16.2)         | 0% (-9.2 to 9.5%)        |      | 11 |
|                                           | Palestine                    | 997 (579–1687)            | 203.2% (163.2 to 253.3%) | 14                | 25.4 (15.1–42.3)        | 20.4% (4.8 to 39.1%)     |      | 17 |
|                                           | Oman                         | 594 (401–826)             | 187.2% (151.7 to 228.9%) | 12                | 14.7 (10.1–20.3)        | -7.1% (-16.1 to 3.1%)    |      | 7  |
|                                           | Qatar                        | 429 (293–598)             | 570.2% (479.3 to 670.4%) | 20                | 15.1 (10.4–20.8)        | -10% (-19 to 0%)         |      | 6  |
|                                           | Saudi Arabia                 | 8773 (6055–12173)         | 290.8% (251.8 to 331.7%) | 16                | 25.6 (17.7–35.4)        | 24.5% (14.3 to 35.2%)    |      | 18 |
|                                           | Syrian Arab Republic         | 4487 (2355–8386)          | 381.2% (188 to 723%)     | 19                | 33.9 (17.7–64)          | 227.3% (88.4 to 477.2%)  |      | 21 |
|                                           | Tunisia                      | 1421 (984–1965)           | 93% (72.6 to 115.7%)     | 4                 | 11.3 (7.8–15.5)         | 2.3% (-7.9 to 13.4%)     |      | 12 |
|                                           | Türkiye                      | 10034 (7184–13736)        | 113.9% (89.8 to 141.7%)  | 8                 | 11.2 (8–15.3)           | 16.5% (5 to 30.4%)       |      | 16 |
|                                           | United Arab Emirates         | 1402 (943–1933)           | 573.3% (479.2 to 684.7%) | 21                | 13.5 (9.2–18.4)         | -5.9% (-14.6 to 4.2%)    |      | 9  |
| Yemen                                     | 4101 (2470–7070)             | 301.3% (202.1 to 461.8%)  | 17                       | 17 (10.6–27.5)    | 45.5% (10.5 to 98.8%)   |                          | 20   |    |
| Afghanistan                               | 8250 (4003–16254)            | 115.1% (33.3 to 288.1%)   | 9                        | 34.8 (16.1–71.7)  | -14.9% (-41 to 39.6%)   |                          | 5    |    |
| Sudan                                     | 4261 (2975–5853)             | 111.3% (81.6 to 143.4%)   | 6                        | 14.5 (10.2–19.7)  | 4.1% (-6.5 to 16.5%)    |                          | 14   |    |
| Moderate/Severe TBI                       | Global                       | 5710006 (4035548–7732980) | 81.1% (78.5 to 84%)      |                   | 69.7 (49.3–94.3)        | 1.3% (0 to 2.7%)         |      |    |
|                                           | North Africa and Middle East | 366440 (262928–489575)    | 126% (113.5 to 134.9%)   |                   | 64.7 (46.6–86.2)        | 2.1% (-2.6 to 5.7%)      |      |    |
|                                           | Algeria                      | 25209 (17920–33941)       | 100.8% (89.2 to 114%)    | 4                 | 62 (44.3–83.5)          | -11.3% (-15.9 to -6.3%)  |      | 5  |
|                                           | Bahrain                      | 1057 (739–1448)           | 323.1% (290.3 to 359.8%) | 19                | 60.4 (42.7–82.4)        | 3.6% (-2.7 to 10.6%)     |      | 13 |
|                                           | Egypt                        | 42450 (29730–57678)       | 107.1% (92.8 to 124%)    | 6                 | 49.2 (34.5–66.6)        | 3.4% (-3.2 to 10.6%)     |      | 12 |
|                                           | Iran (Islamic Republic of)   | 59063 (43787–78802)       | 56.3% (42.3 to 68.7%)    | 2                 | 67.2 (49.8–89.3)        | -25.9% (-33.4 to -20.8%) |      | 2  |
|                                           | Iraq                         | 27218 (18768–38467)       | 145.2% (113.8 to 174.8%) | 10                | 77.1 (53.4–107.8)       | -17.1% (-29 to -6.5%)    |      | 4  |
|                                           | Jordan                       | 4937 (3462–6753)          | 285.5% (258.6 to 315.4%) | 17                | 49.9 (34.8–67.9)        | -4.2% (-9.4 to 1.7%)     |      | 10 |
|                                           | Kuwait                       | 3130 (2213–4237)          | 192.9% (172.4 to 214.4%) | 14                | 67.8 (48.4–91.6)        | -10.2% (-15.3 to -5%)    |      | 7  |
|                                           | Lebanon                      | 3159 (2248–4421)          | 40.3% (8.9 to 67%)       | 1                 | 59.3 (42.2–82.9)        | -26.9% (-41.4 to -14.3%) |      | 1  |
|                                           | Libya                        | 5161 (3684–6943)          | 162.4% (143.6 to 185.4%) | 11                | 74.2 (52.8–99.5)        | 6.3% (-0.6 to 15.8%)     |      | 16 |
|                                           | Morocco                      | 22334 (15760–30222)       | 90.8% (79.1 to 102.5%)   | 3                 | 62.1 (43.8–84.1)        | 3% (-2.8 to 8.8%)        |      | 11 |
|                                           | Palestine                    | 2731 (1843–4038)          | 183.8% (156.8 to 209.1%) | 12                | 71.5 (48.5–103.9)       | 6.9% (-1.5 to 13.9%)     |      | 17 |
|                                           | Oman                         | 3652 (2537–5017)          | 198.1% (178.1 to 217.8%) | 16                | 85.5 (60.2–116.3)       | -5.1% (-9.6 to -0.1%)    |      | 8  |
|                                           | Qatar                        | 2427 (1693–3334)          | 555.4% (509.1 to 605.4%) | 20                | 82.1 (58.3–112.1)       | -10.6% (-15.3 to -5.6%)  |      | 6  |
|                                           | Saudi Arabia                 | 46302 (32141–64030)       | 315% (290.4 to 340.2%)   | 18                | 130.5 (91.7–179.2)      | 25% (19.6 to 31.1%)      |      | 20 |
|                                           | Syrian Arab Republic         | 11277 (7082–18353)        | 190.3% (112.9 to 363%)   | 13                | 82.5 (51.2–136.2)       | 80.6% (30.3 to 196.7%)   |      | 21 |
|                                           | Tunisia                      | 7959 (5606–10868)         | 102.6% (90.6 to 115.6%)  | 5                 | 61.7 (43.4–84.2)        | 3.8% (-1.7 to 9.7%)      |      | 14 |
|                                           | Türkiye                      | 52808 (37969–71236)       | 124.6% (110.2 to 140.4%) | 8                 | 57.9 (41.6–78)          | 19.4% (12.4 to 27.3%)    |      | 19 |
|                                           | United Arab Emirates         | 8574 (5987–11786)         | 609% (552.6 to 668.7%)   | 21                | 73.8 (51.8–100.8)       | -4.7% (-9.8 to 0.7%)     |      | 9  |
| Yemen                                     | 12987 (9126–17590)           | 195.8% (166.6 to 240.6%)  | 15                       | 58.2 (41.4–78.6)  | 10.3% (-0.1 to 29.2%)   |                          | 18   |    |
| Afghanistan                               | 17161 (10831–28999)          | 114% (34 to 237.5%)       | 7                        | 70.8 (43.7–124.1) | -19.7% (-44.9 to 17.1%) |                          | 3    |    |
| Sudan                                     | 6473 (4602–8820)             | 125.3% (103.1 to 148.6%)  | 9                        | 22.5 (16.1–30.6)  | 5.5% (-3.4 to 15%)      |                          | 15   |    |

**Table S13** Disability, prevalence, and incidence of head and spinal injuries in North Africa and Middle East countries

| Location                            |                              | All Ages                  |                           | Age-standardised   |                         |                           |      |
|-------------------------------------|------------------------------|---------------------------|---------------------------|--------------------|-------------------------|---------------------------|------|
|                                     |                              | Number                    | Percent change            | Rate per 100,000   | Percent change          |                           |      |
| Cause                               | Measure                      | 2019                      | From 1990 to 2019         | 2019               | From 1990 to 2019       |                           |      |
|                                     |                              | Mean (95% UI)             | Mean (95% UI)             | Rank               | Mean (95% UI)           | Mean (95% UI)             | Rank |
| Spinal cord lesion at neck level    | Global                       | 4253092 (3040199–5853314) | 72.9% (59.4 to 81.2%)     |                    | 52.3 (37.3–72.1)        | 4.1% (-2 to 10.1%)        |      |
|                                     | North Africa and Middle East | 478758 (220027–1142123)   | 85% (33.5 to 134.8%)      |                    | 77.7 (36.2–184)         | -3.6% (-28.8 to 18.6%)    |      |
|                                     | Algeria                      | 16112 (10072–27420)       | 198.8% (111.7 to 382%)    | 11                 | 37.4 (23.7–62.4)        | 36.3% (-1.6 to 118.3%)    | 16   |
|                                     | Bahrain                      | 507 (353–667)             | 297.9% (232.5 to 381.3%)  | 16                 | 27.6 (19.3–35.9)        | 4.7% (-11 to 24.4%)       | 10   |
|                                     | Egypt                        | 19407 (13662–25647)       | 121.4% (81.7 to 175.7%)   | 7                  | 20.7 (14.7–27.2)        | 11.4% (-7.7 to 35.6%)     | 12   |
|                                     | Iran (Islamic Republic of)   | 45403 (26088–81294)       | -8.2% (-31.9 to 36.5%)    | 2                  | 48.3 (28.1–84.5)        | -52.4% (-65.6 to -29.9%)  | 2    |
|                                     | Iraq                         | 101161 (30457–290074)     | 76.1% (63.5 to 99.5%)     | 5                  | 250.3 (76.5–713.1)      | -29% (-37.7 to -18%)      | 4    |
|                                     | Jordan                       | 2590 (1769–3456)          | 323.5% (249.5 to 427.2%)  | 17                 | 24 (16.7–31.6)          | 8.9% (-8 to 31.2%)        | 11   |
|                                     | Kuwait                       | 2085 (1288–3558)          | 248.5% (188.7 to 319.3%)  | 13                 | 40.3 (25.6–66.9)        | 12.3% (-5.5 to 32.7%)     | 14   |
|                                     | Lebanon                      | 6683 (1907–20012)         | -30.7% (-39.1 to 0.8%)    | 1                  | 124.9 (35.6–375.8)      | -59.3% (-64.8 to -42.7%)  | 1    |
|                                     | Libya                        | 6296 (2895–14626)         | 291.7% (199.9 to 372%)    | 15                 | 85.2 (39.5–199.7)       | 92.9% (34.9 to 150.8%)    | 19   |
|                                     | Morocco                      | 10298 (7376–13405)        | 55.9% (19.7 to 92.1%)     | 4                  | 27.7 (19.8–35.9)        | -7.4% (-25.3 to 10.4%)    | 6    |
|                                     | Palestine                    | 12738 (3692–36518)        | 152.4% (126.9 to 173.8%)  | 8                  | 294.1 (86.7–825.7)      | 12% (-1.2 to 20.9%)       | 13   |
|                                     | Oman                         | 1503 (1036–1983)          | 215.3% (160.8 to 278.1%)  | 12                 | 31.1 (21.6–40.7)        | 2% (-12.4 to 18.4%)       | 8    |
|                                     | Qatar                        | 1086 (750–1434)           | 551.9% (436.1 to 676.7%)  | 20                 | 32.9 (23.2–42.7)        | -9.4% (-21.7 to 3.9%)     | 5    |
|                                     | Saudi Arabia                 | 19302 (13513–25372)       | 288.1% (238.2 to 346.9%)  | 14                 | 47.8 (33.5–61.8)        | 17.9% (3.9 to 33.1%)      | 15   |
|                                     | Syrian Arab Republic         | 54992 (14594–158293)      | 957.7% (407.5 to 2102.3%) | 21                 | 391.5 (102.9–1140.2)    | 734.9% (290.4 to 1616.7%) | 21   |
|                                     | Tunisia                      | 3261 (2300–4228)          | 86.9% (57.7 to 116.2%)    | 6                  | 25.4 (18.1–32.9)        | 2.8% (-11.4 to 17.7%)     | 9    |
|                                     | Türkiye                      | 29313 (19188–43188)       | 158.9% (104.8 to 244.2%)  | 9                  | 31.9 (20.9–47.3)        | 47.9% (17.7 to 99.9%)     | 18   |
|                                     | United Arab Emirates         | 3664 (2562–4774)          | 541.4% (419.2 to 694%)    | 19                 | 28.2 (20–36.2)          | -7.3% (-20.9 to 8.8%)     | 7    |
|                                     | Yemen                        | 24187 (9216–62658)        | 379.2% (246.7 to 490.5%)  | 18                 | 87.2 (33.8–224.9)       | 101.8% (38.9 to 162.4%)   | 20   |
| Afghanistan                         | 94455 (22346–283345)         | 25.1% (-25.6 to 315.1%)   | 3                         | 325.6 (73.8–997.6) | -52.1% (-68.1 to 36.6%) | 3                         |      |
| Sudan                               | 23229 (13788–46606)          | 180.4% (136.6 to 222.8%)  | 10                        | 68.8 (41.8–132.9)  | 36.7% (12.7 to 61.4%)   | 17                        |      |
| Spinal cord lesion below neck level | Global                       | 1947717 (1370638–2571462) | 51.1% (44.7 to 57.6%)     |                    | 23.9 (16.8–31.5)        | -12% (-15.4 to -8.5%)     |      |
|                                     | North Africa and Middle East | 85431 (59750–113824)      | 88.1% (74.3 to 101.8%)    |                    | 14.5 (10.2–19.3)        | -14.1% (-20.4 to -7.9%)   |      |
|                                     | Algeria                      | 5431 (3738–7277)          | 62.3% (38.7 to 89.2%)     | 7                  | 13 (9–17.5)             | -25.5% (-35.4 to -14%)    | 5    |
|                                     | Bahrain                      | 209 (145–285)             | 228% (170.4 to 302.9%)    | 18                 | 11.7 (8.1–15.9)         | -15.1% (-28.3 to 0.3%)    | 13   |
|                                     | Egypt                        | 9565 (6545–12709)         | 68.2% (39.8 to 99.9%)     | 8                  | 10.5 (7.2–13.9)         | -15.4% (-29.6 to -0.5%)   | 12   |
|                                     | Iran (Islamic Republic of)   | 13521 (8937–19264)        | 48.5% (35.7 to 60.3%)     | 4                  | 15 (10–21.4)            | -28% (-34.3 to -22%)      | 3    |
|                                     | Iraq                         | 5258 (3619–7084)          | 132.5% (98.8 to 172.3%)   | 13                 | 14.3 (9.9–19.3)         | -20.7% (-31.5 to -8.4%)   | 8    |
|                                     | Jordan                       | 1088 (730–1489)           | 200.7% (150.9 to 256.9%)  | 17                 | 10.4 (7.1–14.2)         | -22.8% (-33.6 to -10.5%)  | 7    |
|                                     | Kuwait                       | 570 (390–789)             | 168.6% (124.8 to 218.6%)  | 15                 | 11.7 (8.1–16.2)         | -15.8% (-27.5 to -2.6%)   | 11   |
|                                     | Lebanon                      | 544 (372–742)             | 24.1% (4 to 45.4%)        | 1                  | 10.2 (6.9–13.8)         | -35.4% (-45.4 to -24.5%)  | 1    |
|                                     | Libya                        | 1070 (744–1435)           | 130.5% (94.9 to 169.6%)   | 12                 | 14.9 (10.5–19.7)        | -3.6% (-16.7 to 11.2%)    | 19   |
|                                     | Morocco                      | 5522 (3863–7341)          | 57.3% (33.8 to 81.8%)     | 6                  | 15 (10.6–19.9)          | -12.1% (-24.2 to 0.7%)    | 17   |
|                                     | Palestine                    | 584 (389–850)             | 90.4% (28.8 to 168.5%)    | 9                  | 14.9 (9.9–22.4)         | -25.6% (-44.5 to -2.5%)   | 4    |
|                                     | Oman                         | 613 (408–839)             | 134.1% (91.5 to 183.7%)   | 14                 | 13.3 (9.1–17.9)         | -24.6% (-36 to -11.4%)    | 6    |
|                                     | Qatar                        | 439 (287–617)             | 396.5% (302.9 to 501.6%)  | 20                 | 13.8 (9.3–19.1)         | -32.1% (-42.1 to -21.3%)  | 2    |
|                                     | Saudi Arabia                 | 8725 (5893–11997)         | 187.4% (146.5 to 235.9%)  | 16                 | 22.8 (15.4–30.7)        | -12.2% (-24 to 0.8%)      | 16   |
|                                     | Syrian Arab Republic         | 1673 (1173–2294)          | 47.4% (23.8 to 75.6%)     | 2                  | 11.7 (8.2–16)           | -6.4% (-19.9 to 9.5%)     | 18   |
|                                     | Tunisia                      | 1456 (999–1987)           | 47.8% (25.3 to 72.8%)     | 3                  | 11.3 (7.8–15.5)         | -20.3% (-31.9 to -7.5%)   | 9    |
|                                     | Türkiye                      | 10849 (7328–15191)        | 56.6% (28.6 to 89.6%)     | 5                  | 11.8 (8–16.5)           | -13.3% (-28.3 to 5%)      | 15   |
|                                     | United Arab Emirates         | 1800 (1237–2461)          | 482.4% (373.3 to 611%)    | 21                 | 14.7 (10.3–19.6)        | -17.5% (-29.3 to -5.1%)   | 10   |
|                                     | Yemen                        | 3284 (2275–4342)          | 128.1% (92.4 to 171.5%)   | 11                 | 13.7 (9.5–17.9)         | -13.8% (-25.9 to 0%)      | 14   |
| Afghanistan                         | 4434 (3065–6190)             | 251.3% (173.4 to 354.2%)  | 19                        | 16.4 (11.4–23.2)   | 14.3% (-8.5 to 49.6%)   | 21                        |      |
| Sudan                               | 8709 (6089–11611)            | 108.5% (81.2 to 140.4%)   | 10                        | 27.7 (19.5–36.5)   | -3.4% (-14.8 to 9%)     | 20                        |      |

**Table S13** Disability, prevalence, and incidence of head and spinal injuries in North Africa and Middle East countries

| Location        |                              | All Ages                  |                           | Age-standardised   |                         |                           |      |
|-----------------|------------------------------|---------------------------|---------------------------|--------------------|-------------------------|---------------------------|------|
|                 |                              | Number                    | Percent change            | Rate per 100,000   | Percent change          |                           | Rank |
| Cause           | Measure                      | 2019                      | From 1990 to 2019         | 2019               | From 1990 to 2019       |                           |      |
|                 |                              | Mean (95% UI)             | Mean (95% UI)             | Rank               | Mean (95% UI)           | Mean (95% UI)             |      |
| Head Injuries   | Global                       | 7076902 (4997948–9588098) | 79% (76.6 to 81.5%)       |                    | 86.5 (61.1–117.2)       | 0.1% (-1 to 1.3%)         |      |
|                 | North Africa and Middle East | 453033 (331629–604021)    | 124.9% (111.3 to 133.7%)  |                    | 80.1 (58.6–106.9)       | 1.9% (-3.5 to 5.4%)       |      |
|                 | Algeria                      | 29937 (21475–40072)       | 102.1% (90.9 to 114.9%)   | 5                  | 73.8 (52.9–99)          | -10.6% (-14.9 to -6%)     | 6    |
|                 | Bahrain                      | 1239 (871–1704)           | 322.1% (292 to 355.1%)    | 19                 | 71.4 (50.3–97)          | 3.6% (-2.3 to 9.8%)       | 13   |
|                 | Egypt                        | 50341 (35383–68471)       | 107.9% (95 to 122.9%)     | 6                  | 58.6 (41.4–79.3)        | 4% (-2.1 to 10.7%)        | 14   |
|                 | Iran (Islamic Republic of)   | 70192 (52341–93184)       | 52.2% (39.8 to 63.9%)     | 2                  | 80.1 (59.6–106.4)       | -28.1% (-34.8 to -23.2%)  | 2    |
|                 | Iraq                         | 37310 (26823–50871)       | 136.4% (111.1 to 161.5%)  | 10                 | 105.8 (76.4–143.3)      | -19.9% (-30.1 to -10.6%)  | 3    |
|                 | Jordan                       | 5884 (4095–7991)          | 285% (261.2 to 310.9%)    | 17                 | 59.4 (41.4–80.3)        | -3.9% (-8.6 to 1%)        | 10   |
|                 | Kuwait                       | 3711 (2638–5012)          | 182% (157.4 to 204.3%)    | 12                 | 80.6 (57.8–108.6)       | -12% (-18 to -6.7%)       | 5    |
|                 | Lebanon                      | 4026 (2849–5569)          | 32.7% (7 to 58.8%)        | 1                  | 75.7 (53.6–105.1)       | -30.4% (-42.8 to -18%)    | 1    |
|                 | Libya                        | 6320 (4603–8529)          | 168.7% (151.7 to 189.7%)  | 11                 | 91.1 (66.4–122.5)       | 9.9% (3.2 to 18.6%)       | 16   |
|                 | Morocco                      | 26514 (18727–35851)       | 89% (78.7 to 99.1%)       | 3                  | 73.9 (52–100.1)         | 2.5% (-2.9 to 7.6%)       | 11   |
|                 | Palestine                    | 3728 (2642–5148)          | 188.7% (163.9 to 212.4%)  | 13                 | 97 (69.2–133.3)         | 10.2% (2.1 to 17.8%)      | 17   |
|                 | Oman                         | 4246 (2938–5805)          | 196.5% (179.6 to 214.8%)  | 14                 | 100.2 (70.5–136.3)      | -5.4% (-9.6 to -0.8%)     | 8    |
|                 | Qatar                        | 2857 (1994–3911)          | 557.5% (514.3 to 600.8%)  | 20                 | 97.2 (68.5–132.2)       | -10.5% (-14.8 to -6.2%)   | 7    |
|                 | Saudi Arabia                 | 55075 (38616–75312)       | 310.9% (289.1 to 332.1%)  | 18                 | 156.1 (109.5–212.2)     | 25% (20.1 to 29.7%)       | 20   |
|                 | Syrian Arab Republic         | 15764 (10567–23012)       | 227.2% (146 to 379.1%)    | 16                 | 116.4 (75.7–170)        | 107.7% (51.8 to 211.9%)   | 21   |
|                 | Tunisia                      | 9380 (6559–12772)         | 101.1% (90.9 to 112.3%)   | 4                  | 73 (51.3–99.5)          | 3.5% (-1.5 to 8.8%)       | 12   |
|                 | Türkiye                      | 62842 (45196–84968)       | 122.8% (109.8 to 137.1%)  | 9                  | 69.1 (49.6–93.2)        | 18.9% (12.6 to 26.1%)     | 19   |
|                 | United Arab Emirates         | 9976 (6962–13671)         | 603.8% (555.7 to 656.9%)  | 21                 | 87.3 (60.9–119.3)       | -4.9% (-9.5 to 0%)        | 9    |
|                 | Yemen                        | 17087 (12086–23384)       | 215.7% (182.1 to 263.2%)  | 15                 | 75.2 (54.3–101.2)       | 16.7% (4.8 to 33.9%)      | 18   |
| Afghanistan     | 25411 (16490–40529)          | 114.3% (34.3 to 250.9%)   | 7                         | 105.6 (66.4–176.9) | -18.2% (-43.5 to 22.8%) | 4                         |      |
| Sudan           | 10734 (7768–14444)           | 119.5% (99.9 to 139.2%)   | 8                         | 37 (27–49.6)       | 4.9% (-1.9 to 12.7%)    | 15                        |      |
| Spinal Injuries | Global                       | 6200809 (4465317–8156193) | 65.4% (56.3 to 72%)       |                    | 76.2 (54.8–100.4)       | -1.5% (-5.6 to 3.3%)      |      |
|                 | North Africa and Middle East | 564189 (289631–1229092)   | 85.5% (36.6 to 124.6%)    |                    | 92.2 (48–198.8)         | -5.4% (-27.6 to 12.3%)    |      |
|                 | Algeria                      | 21542 (14186–32871)       | 146.5% (91.6 to 263.6%)   | 9                  | 50.5 (33.5–75.6)        | 12.2% (-11.6 to 62.6%)    | 16   |
|                 | Bahrain                      | 716 (501–939)             | 274.7% (224.5 to 332.1%)  | 16                 | 39.3 (27.9–51.1)        | -2.1% (-13.7 to 11.7%)    | 11   |
|                 | Egypt                        | 28971 (20531–37521)       | 100.5% (75.2 to 133.9%)   | 7                  | 31.2 (22.2–40.3)        | 0.7% (-11.7 to 16.9%)     | 12   |
|                 | Iran (Islamic Republic of)   | 58925 (36923–97182)       | 0.7% (-26.5 to 40%)       | 2                  | 63.3 (39.9–102)         | -48.3% (-62.5 to -29.6%)  | 3    |
|                 | Iraq                         | 106419 (35020–295453)     | 78.2% (65.8 to 104.2%)    | 6                  | 264.6 (89.6–729.2)      | -28.6% (-37.1 to -18.4%)  | 4    |
|                 | Jordan                       | 3679 (2567–4814)          | 277.9% (228 to 346.7%)    | 17                 | 34.4 (24.2–44.8)        | -3.2% (-14.6 to 11.5%)    | 10   |
|                 | Kuwait                       | 2655 (1727–4220)          | 227.6% (179.1 to 283.8%)  | 13                 | 52 (34.5–79.6)          | 4.4% (-10.2 to 21%)       | 13   |
|                 | Lebanon                      | 7227 (2416–20570)         | -28.3% (-37.9 to 4.3%)    | 1                  | 135 (45.1–386.4)        | -58.1% (-63.8 to -41.5%)  | 1    |
|                 | Libya                        | 7366 (3820–15730)         | 255.6% (178.8 to 331.9%)  | 15                 | 100.1 (52–214.7)        | 67.9% (21.6 to 123.9%)    | 19   |
|                 | Morocco                      | 15820 (11427–20411)       | 56.4% (29.9 to 80.1%)     | 4                  | 42.7 (30.9–55)          | -9.1% (-21.4 to 2.7%)     | 7    |
|                 | Palestine                    | 13321 (4255–37063)        | 148.8% (118.7 to 168.3%)  | 10                 | 309 (100.2–843.4)       | 9.3% (-5.8 to 17.9%)      | 15   |
|                 | Oman                         | 2116 (1481–2770)          | 186.5% (148.6 to 232.1%)  | 12                 | 44.4 (31.2–57.6)        | -7.8% (-17.9 to 4.1%)     | 8    |
|                 | Qatar                        | 1525 (1072–2024)          | 498% (415.6 to 588.7%)    | 19                 | 46.7 (32.9–61.2)        | -17.5% (-26.8 to -8.3%)   | 5    |
|                 | Saudi Arabia                 | 28027 (19946–36763)       | 249.9% (213.8 to 290.2%)  | 14                 | 70.6 (50.1–92.2)        | 6.2% (-3.8 to 16.6%)      | 14   |
|                 | Syrian Arab Republic         | 56665 (16102–159728)      | 794.6% (325.3 to 1703.5%) | 21                 | 403.2 (112.6–1150.3)    | 579.2% (218.2 to 1263.6%) | 21   |
|                 | Tunisia                      | 4717 (3406–6139)          | 72.8% (51.4 to 94.8%)     | 5                  | 36.7 (26.5–47.6)        | -5.7% (-16 to 5.6%)       | 9    |
|                 | Türkiye                      | 40162 (27330–56767)       | 120.1% (83.7 to 175.5%)   | 8                  | 43.7 (29.7–61.9)        | 24.2% (3.7 to 55.5%)      | 18   |
|                 | United Arab Emirates         | 5464 (3826–7080)          | 520.7% (428.5 to 622.5%)  | 20                 | 42.9 (30.9–54.8)        | -11.1% (-21.3 to -1.1%)   | 6    |
|                 | Yemen                        | 27471 (12186–66369)       | 323.5% (208.3 to 439.2%)  | 18                 | 100.9 (45.9–237.9)      | 70.7% (18.8 to 131.1%)    | 20   |
| Afghanistan     | 98889 (26400–287537)         | 28.8% (-24.1 to 309.3%)   | 3                         | 342 (87.3–1016.4)  | -50.7% (-67.5 to 33%)   | 2                         |      |
| Sudan           | 31938 (20436–55444)          | 156.3% (122.8 to 192.8%)  | 11                        | 96.5 (63.1–164.2)  | 22.2% (5.5 to 42.6%)    | 17                        |      |

**Table S13** Disability, prevalence, and incidence of head and spinal injuries in North Africa and Middle East countries

| Location            | Cause                        | Measure              | All Ages                     |                          | Age-standardised    |                         |                          | Rank |
|---------------------|------------------------------|----------------------|------------------------------|--------------------------|---------------------|-------------------------|--------------------------|------|
|                     |                              |                      | Number                       | Percent change           | Rate per 100,000    | Percent change          |                          |      |
|                     |                              |                      | 2019                         | From 1990 to 2019        | 2019                | From 1990 to 2019       |                          |      |
|                     |                              | Mean (95% UI)        | Mean (95% UI)                | Rank                     | Mean (95% UI)       | Mean (95% UI)           |                          |      |
| <b>Prevalence</b>   |                              |                      |                              |                          |                     |                         |                          |      |
| Minor TBI           | Global                       |                      | 11482589 (10758798–12351815) | 71.3% (67.8 to 74.5%)    |                     | 141.9 (133–152.7)       | -4.4% (-5.7 to -3.2%)    |      |
|                     | North Africa and Middle East |                      | 720413 (591293–955610)       | 119.7% (98.8 to 132.8%)  |                     | 129 (106.2–170.2)       | 0.2% (-9.6 to 6.3%)      |      |
|                     | Algeria                      |                      | 39090 (35470–43719)          | 109% (95.9 to 129.5%)    | 6                   | 98.1 (89.4–108.9)       | -6.4% (-11.4 to 1.7%)    | 8    |
|                     | Bahrain                      |                      | 1489 (1369–1612)             | 314.7% (294.7 to 336.8%) | 18                  | 92.6 (85.6–100)         | 3.2% (-1.1 to 7.8%)      | 13   |
|                     | Egypt                        |                      | 65076 (60170–70707)          | 111.8% (102.8 to 121.1%) | 7                   | 78.1 (72.6–84)          | 7% (3.1 to 11%)          | 15   |
|                     | Iran (Islamic Republic of)   |                      | 92711 (81930–110077)         | 32.7% (11.3 to 53.3%)    | 2                   | 108.5 (96.2–128.2)      | -38.8% (-52.4 to -27.4%) | 2    |
|                     | Iraq                         |                      | 83833 (53435–142108)         | 112.7% (87.2 to 139.6%)  | 8                   | 241.5 (154.3–413.9)     | -28.4% (-41.1 to -15.2%) | 3    |
|                     | Jordan                       |                      | 7774 (7129–8520)             | 281.6% (265.9 to 299.7%) | 15                  | 78.7 (72.7–85.4)        | -2.9% (-6.2 to 1%)       | 10   |
|                     | Kuwait                       |                      | 4771 (4305–5380)             | 129.6% (66.3 to 182.4%)  | 11                  | 106.5 (96.7–119.3)      | -21.6% (-38.9 to -9.6%)  | 4    |
|                     | Lebanon                      |                      | 7301 (5178–12217)            | 11.6% (-8.8 to 42.1%)    | 1                   | 138.3 (97.8–231.3)      | -40.5% (-51.5 to -25%)   | 1    |
|                     | Libya                        |                      | 9647 (7867–12989)            | 202.8% (167 to 257%)     | 14                  | 141.4 (116.4–187.5)     | 30.8% (14.8 to 56.5%)    | 19   |
|                     | Morocco                      |                      | 34642 (32135–37604)          | 80.3% (73.5 to 87.9%)    | 3                   | 98.8 (91.7–107.1)       | 0.3% (-2.9 to 3.8%)      | 11   |
|                     | Palestine                    |                      | 8308 (5057–14690)            | 201.7% (174.9 to 237.3%) | 13                  | 214.1 (131.3–372.1)     | 20.5% (9 to 34.4%)       | 17   |
|                     | Oman                         |                      | 4866 (4483–5315)             | 186.1% (174.5 to 198.9%) | 12                  | 123.1 (114.3–132.7)     | -6.7% (-9.6 to -3.3%)    | 7    |
|                     | Qatar                        |                      | 3511 (3190–3893)             | 570.1% (540.5 to 601.1%) | 20                  | 126.8 (117.1–137.9)     | -9.4% (-12.8 to -5.8%)   | 6    |
|                     | Saudi Arabia                 |                      | 72399 (64683–81721)          | 289.9% (266.5 to 315.1%) | 16                  | 215.3 (195.4–239.6)     | 25% (18.7 to 31.4%)      | 18   |
|                     | Syrian Arab Republic         |                      | 37575 (19729–71859)          | 389% (193 to 722.1%)     | 19                  | 286.9 (147.5–571.1)     | 234.4% (91.4 to 478.2%)  | 21   |
|                     | Tunisia                      |                      | 11811 (10995–12674)          | 94.2% (86.2 to 102.1%)   | 4                   | 94.1 (87.5–101.3)       | 2.7% (-0.5 to 5.7%)      | 12   |
|                     | Türkiye                      |                      | 83419 (76697–91188)          | 115% (103.9 to 127.6%)   | 9                   | 93.3 (85.8–102)         | 16.9% (11.6 to 23.5%)    | 16   |
|                     | United Arab Emirates         |                      | 11458 (10596–12412)          | 573.8% (546.6 to 605.7%) | 21                  | 113.4 (105.8–122.1)     | -5.4% (-8.2 to -2.5%)    | 9    |
| Yemen               |                              | 34648 (23883–56263)  | 309% (215.5 to 466%)         | 17                       | 144.6 (103.2–223.6) | 48.1% (14.5 to 102.6%)  | 20                       |      |
| Afghanistan         |                              | 70165 (34848–142450) | 116.1% (35.2 to 291.7%)      | 10                       | 301 (139.5–639.5)   | -13.7% (-39.2 to 43.5%) | 5                        |      |
| Sudan               |                              | 35188 (30134–43909)  | 108.8% (83.3 to 128%)        | 5                        | 121 (105.1–149.1)   | 3.5% (-4 to 11.2%)      | 14                       |      |
| Moderate/Severe TBI | Global                       |                      | 37505339 (35614732–39599637) | 82.8% (80 to 85.7%)      |                     | 457.4 (434.3–482.6)     | 1.4% (0.1 to 2.8%)       |      |
|                     | North Africa and Middle East |                      | 2376468 (2188401–2700644)    | 130% (116.8 to 138.2%)   |                     | 423.2 (390.4–479.2)     | 3.1% (-2 to 6.1%)        |      |
|                     | Algeria                      |                      | 163516 (154536–173917)       | 104.2% (97.1 to 112%)    | 4                   | 404.8 (383.8–429.5)     | -10.5% (-13.1 to -7.5%)  | 5    |
|                     | Bahrain                      |                      | 6842 (6435–7323)             | 331% (314.2 to 348%)     | 19                  | 394.3 (372.7–419.7)     | 4.5% (1.3 to 7.9%)       | 14   |
|                     | Egypt                        |                      | 272495 (258365–287373)       | 108.1% (101.6 to 115.2%) | 6                   | 318.5 (302.7–334.8)     | 3.6% (0.5 to 6.8%)       | 12   |
|                     | Iran (Islamic Republic of)   |                      | 386217 (357662–420709)       | 64.8% (50.3 to 75.3%)    | 2                   | 441.4 (410.4–478.8)     | -23.9% (-31.9 to -18.9%) | 2    |
|                     | Iraq                         |                      | 177373 (144014–255710)       | 144.3% (114 to 171.3%)   | 10                  | 508.7 (417.6–728.7)     | -18.1% (-30 to -8.2%)    | 4    |
|                     | Jordan                       |                      | 31647 (29851–33490)          | 290.5% (279 to 302.4%)   | 17                  | 324.1 (306.9–341.8)     | -3.8% (-6.2 to -1.3%)    | 10   |
|                     | Kuwait                       |                      | 20178 (18941–21626)          | 199.7% (189.1 to 210.7%) | 15                  | 443.3 (419.6–473.3)     | -8.8% (-11.4 to -6.3%)   | 7    |
|                     | Lebanon                      |                      | 20744 (18109–27107)          | 41.4% (10.6 to 67.1%)    | 1                   | 389.8 (339.9–510.3)     | -26.8% (-41.5 to -14.8%) | 1    |
|                     | Libya                        |                      | 33484 (30875–37616)          | 166.2% (154.2 to 184.5%) | 11                  | 485.9 (450.3–543)       | 7% (2.4 to 15.1%)        | 16   |

**Table S13** Disability, prevalence, and incidence of head and spinal injuries in North Africa and Middle East countries

| Location                            |                              | All Ages                    |                          |    | Age-standardised     |                         |                          |      |
|-------------------------------------|------------------------------|-----------------------------|--------------------------|----|----------------------|-------------------------|--------------------------|------|
|                                     |                              | Number                      | Percent change           |    | Rate per 100,000     | Percent change          |                          |      |
| Cause                               | Measure                      | 2019                        | From 1990 to 2019        |    | 2019                 | From 1990 to 2019       |                          |      |
|                                     |                              | Mean (95% UI)               | Mean (95% UI)            |    | Rank                 | Mean (95% UI)           | Mean (95% UI)            | Rank |
| Spinal cord lesion at neck level    | Morocco                      | 144833 (136919–153465)      | 93.4% (86.3 to 99.3%)    |    | 3                    | 404.5 (383.4–427.9)     | 3.5% (0.3 to 6.2%)       | 11   |
|                                     | Palestine                    | 17858 (13854–27341)         | 187.1% (161.2 to 203.5%) |    | 12                   | 474.3 (371.7–721.2)     | 8.1% (0 to 12.7%)        | 17   |
|                                     | Oman                         | 23269 (21831–24840)         | 199.2% (190.9 to 207.4%) |    | 14                   | 555.9 (526.6–589)       | -4.6% (-6.9 to -2.4%)    | 8    |
|                                     | Qatar                        | 15463 (14427–16703)         | 558.5% (539.7 to 582%)   |    | 20                   | 537.2 (509.1–572.8)     | -9.8% (-12.2 to -7%)     | 6    |
|                                     | Saudi Arabia                 | 297376 (274874–323853)      | 318% (301.9 to 333.9%)   |    | 18                   | 855.4 (798–919.3)       | 25.6% (22.1 to 29%)      | 20   |
|                                     | Syrian Arab Republic         | 74284 (52381–129427)        | 200.3% (121.1 to 369.7%) |    | 16                   | 546.8 (376.2–974.9)     | 84.6% (31.4 to 194.7%)   | 21   |
|                                     | Tunisia                      | 51831 (49256–54732)         | 106% (100.6 to 111.8%)   |    | 5                    | 401.9 (382.3–424.2)     | 4.3% (2 to 7.1%)         | 13   |
|                                     | Türkiye                      | 344715 (325611–366874)      | 128.6% (120.2 to 138.6%) |    | 9                    | 377.8 (357.6–401.5)     | 20.3% (16 to 25.1%)      | 19   |
|                                     | United Arab Emirates         | 54835 (51305–58856)         | 616.8% (587.1 to 640.8%) |    | 21                   | 480.1 (455.6–509.7)     | -4.1% (-6.8 to -2%)      | 9    |
|                                     | Yemen                        | 83073 (73742–102117)        | 195.9% (175.2 to 236.2%) |    | 13                   | 379.9 (337.2–466.3)     | 10.6% (2.2 to 29.3%)     | 18   |
|                                     | Afghanistan                  | 112371 (77419–202832)       | 109.3% (33.3 to 229%)    |    | 7                    | 473.6 (316.7–887.3)     | -20.4% (-45.2 to 15.6%)  | 3    |
|                                     | Sudan                        | 41654 (38114–47604)         | 127.1% (119.2 to 136.4%) |    | 8                    | 147.5 (135.4–166.9)     | 6.5% (2.7 to 11.7%)      | 15   |
|                                     | Global                       | 10857565 (9490785–13911786) | 82.9% (69.7 to 91.1%)    |    |                      | 133.3 (116.3–171.1)     | 8.7% (2.8 to 14.7%)      |      |
|                                     | North Africa and Middle East | 1179736 (578725–2753325)    | 98.8% (42.8 to 150.3%)   |    |                      | 192.6 (95.9–445.7)      | 2.3% (-24.7 to 24.9%)    |      |
|                                     | Algeria                      | 40733 (29768–67436)         | 221.5% (139.2 to 415.9%) |    |                      | 95 (70.4–154.2)         | 45.6% (10.5 to 129.3%)   | 17   |
|                                     | Bahrain                      | 1314 (1196–1491)            | 337.8% (300.2 to 368.3%) |    | 11                   | 72.1 (66–81.2)          | 14.4% (3.6 to 22.4%)     | 10   |
|                                     | Egypt                        | 47851 (43430–55034)         | 138% (119.3 to 172.1%)   |    | 16                   | 51.4 (47–58.3)          | 19.3% (10.8 to 34.9%)    | 12   |
|                                     | Iran (Islamic Republic of)   | 118774 (77897–213075)       | 1.3% (-24.5 to 52.5%)    |    | 7                    | 127 (85.4–222.2)        | -48.8% (-63.2 to -23.7%) | 3    |
|                                     | Iraq                         | 250995 (76003–710887)       | 88.9% (77.5 to 110.4%)   |    | 2                    | 626.6 (193.4–1771.8)    | -25.1% (-34.9 to -14%)   | 4    |
|                                     | Jordan                       | 6598 (5933–7818)            | 359.7% (320.8 to 442.6%) |    | 5                    | 61.8 (56.2–71.9)        | 17.5% (8.7 to 35.2%)     | 11   |
|                                     | Kuwait                       | 5517 (3998–9287)            | 280.2% (233.8 to 345.5%) |    | 17                   | 107.9 (80.3–176.4)      | 21.5% (6.5 to 45.7%)     | 14   |
|                                     | Lebanon                      | 18126 (5491–58095)          | -21.4% (-30.5 to 12.7%)  |    | 13                   | 338.9 (102.6–1087)      | -54.1% (-60 to -36.4%)   | 1    |
|                                     | Libya                        | 15744 (7745–36439)          | 317.9% (229.1 to 390.4%) |    | 1                    | 213.7 (105.7–498.9)     | 103.4% (44.1 to 161.2%)  | 19   |
|                                     | Morocco                      | 25296 (23066–28856)         | 69% (34.9 to 92.6%)      |    | 14                   | 68.3 (62.4–77.6)        | -0.4% (-16.5 to 10.4%)   | 6    |
|                                     | Palestine                    | 31857 (9434–90472)          | 169.9% (145.5 to 183.3%) |    | 4                    | 742.4 (223.5–2100.8)    | 19.5% (6.1 to 26.6%)     | 13   |
|                                     | Oman                         | 3892 (3564–4215)            | 244.2% (226.7 to 260.7%) |    | 8                    | 82 (76.4–88.2)          | 11.7% (7 to 16.9%)       | 9    |
|                                     | Qatar                        | 2843 (2610–3081)            | 617.8% (580.9 to 658.7%) |    | 12                   | 87.9 (81.6–95)          | 0.4% (-4.3 to 5.2%)      | 7    |
|                                     | Saudi Arabia                 | 50055 (45545–55087)         | 326.2% (303.3 to 352.5%) |    | 20                   | 126.1 (115.6–137.9)     | 29.1% (23.1 to 35.6%)    | 15   |
| Syrian Arab Republic                | 138355 (38037–399489)        | 1049.3% (458.8 to 2231.5%)  |                          | 15 | 989.8 (275.3–2883.5) | 801.4% (319.5 to 1724%) | 21                       |      |
| Tunisia                             | 8545 (7943–9249)             | 103.7% (92.5 to 115.1%)     |                          | 21 | 66.5 (61.8–72)       | 10.7% (4.8 to 17.2%)    | 8                        |      |
| Türkiye                             | 77214 (61893–109056)         | 191.5% (147.8 to 272.8%)    |                          | 6  | 83.9 (67.3–118.5)    | 64.9% (38.9 to 114.4%)  | 18                       |      |
| United Arab Emirates                | 9063 (8389–9800)             | 582.7% (532 to 620.7%)      |                          | 9  | 70.6 (66–75.8)       | -1.9% (-7.3 to 2.6%)    | 5                        |      |
| Yemen                               | 56156 (22113–148124)         | 404.1% (276.1 to 506.9%)    |                          | 19 | 207.3 (84.5–545.3)   | 114% (45.9 to 178.7%)   | 20                       |      |
| Afghanistan                         | 214777 (51501–641727)        | 28.9% (-23.3 to 330.8%)     |                          | 18 | 755.2 (173–2296.9)   | -50.1% (-66.8 to 44.9%) | 2                        |      |
| Sudan                               | 54832 (36638–101867)         | 198.7% (166.9 to 234.5%)    |                          | 3  | 164.5 (112.8–296.7)  | 45.4% (26.3 to 70.1%)   | 16                       |      |
| Spinal cord lesion below neck level | Global                       | 9777472 (9208477–10448724)  | 80.1% (76.1 to 84.5%)    |    | 10                   | 119.7 (112.8–128)       | 2.8% (0.9 to 5.1%)       |      |

**Table S13** Disability, prevalence, and incidence of head and spinal injuries in North Africa and Middle East countries

| Location      |                              | All Ages                     |                          | Age-standardised         |                          |      |  |
|---------------|------------------------------|------------------------------|--------------------------|--------------------------|--------------------------|------|--|
|               |                              | Number                       | Percent change           | Rate per 100,000         | Percent change           | Rank |  |
| Cause         | Measure                      | 2019                         | From 1990 to 2019        | 2019                     | From 1990 to 2019        | Rank |  |
|               |                              | Mean (95% UI)                | Mean (95% UI)            | Mean (95% UI)            | Mean (95% UI)            | Rank |  |
| Head Injuries | North Africa and Middle East | 418004 (387020–462511)       | 148.2% (141 to 157.3%)   | 71.7 (66.4–79.4)         | 13% (9.8 to 17.6%)       |      |  |
|               | Algeria                      | 27040 (24961–29482)          | 110.4% (99.9 to 120.6%)  | 6 65.3 (60.4–71.1)       | -4.3% (-8.6 to 0%)       | 3    |  |
|               | Bahrain                      | 1149 (1070–1230)             | 361.3% (336.4 to 387.6%) | 19 65.2 (61–69.6)        | 18.3% (12.3 to 24.5%)    | 17   |  |
|               | Egypt                        | 43873 (40983–46736)          | 116.5% (106.6 to 127.8%) | 7 48.7 (45.6–51.7)       | 8.5% (3.9 to 13.8%)      | 13   |  |
|               | Iran (Islamic Republic of)   | 73619 (61638–95401)          | 103.6% (93 to 116.7%)    | 5 82.1 (69.1–105.7)      | -2.8% (-8.2 to 4.5%)     | 4    |  |
|               | Iraq                         | 24654 (23214–26281)          | 192.8% (182.8 to 204.7%) | 13 67.9 (64.2–72.2)      | -0.6% (-3.8 to 3.1%)     | 7    |  |
|               | Jordan                       | 5759 (5393–6150)             | 310% (294 to 330.6%)     | 17 55.8 (52.5–59.4)      | 4.4% (0.6 to 9%)         | 10   |  |
|               | Kuwait                       | 3408 (3177–3653)             | 225.2% (212.3 to 239.7%) | 14 70.8 (66.4–75.4)      | 1.3% (-2.5 to 5.3%)      | 9    |  |
|               | Lebanon                      | 3281 (3081–3507)             | 79.9% (69.7 to 89.7%)    | 1 61.4 (57.6–65.5)       | -6.9% (-12.3 to -1.8%)   | 2    |  |
|               | Libya                        | 5232 (4863–5774)             | 181.7% (164.7 to 207.5%) | 12 73.3 (68.3–80.3)      | 16.8% (10.2 to 26.3%)    | 16   |  |
|               | Morocco                      | 23840 (22369–25585)          | 96.9% (88.7 to 107%)     | 2 65.1 (61–69.8)         | 9.2% (5.1 to 14.4%)      | 14   |  |
|               | Palestine                    | 2760 (2385–3550)             | 128.4% (60.1 to 198.9%)  | 8 71.4 (60.7–96.1)       | -10.4% (-30.8 to 8%)     | 1    |  |
|               | Oman                         | 3539 (3267–3840)             | 232% (215.9 to 249.7%)   | 15 78.2 (72.9–83.7)      | 6.9% (2.3 to 12.1%)      | 12   |  |
|               | Qatar                        | 2595 (2389–2806)             | 618.3% (581 to 653.8%)   | 21 83.6 (77.5–89.7)      | -1.5% (-6.2 to 3%)       | 5    |  |
|               | Saudi Arabia                 | 49177 (45198–53903)          | 312.1% (288.7 to 337%)   | 18 130.3 (121–141.7)     | 25.5% (19.3 to 31.9%)    | 19   |  |
|               | Syrian Arab Republic         | 8426 (7804–9100)             | 98.9% (88.9 to 110.6%)   | 3 59.1 (54.6–63.9)       | 25% (18.5 to 33.2%)      | 18   |  |
|               | Tunisia                      | 8153 (7647–8827)             | 99.6% (88.9 to 109.6%)   | 4 63.4 (59.5–68.5)       | 6.5% (1.3 to 11.7%)      | 11   |  |
|               | Türkiye                      | 61977 (56066–72328)          | 139% (120.7 to 170.1%)   | 9 67.5 (61.1–78.6)       | 31.1% (21.3 to 46.9%)    | 21   |  |
|               | United Arab Emirates         | 8213 (7624–8844)             | 606.3% (573.7 to 636.9%) | 20 68.1 (63.8–72.6)      | -0.6% (-4.2 to 3.1%)     | 6    |  |
|               | Yemen                        | 12455 (11570–13316)          | 166% (145.8 to 180.6%)   | 11 52.7 (49.1–56.5)      | 0.4% (-6.1 to 5%)        | 8    |  |
|               | Afghanistan                  | 14498 (12307–18547)          | 284.9% (239 to 370.4%)   | 16 54.7 (46.1–71.2)      | 26.8% (10.7 to 57.7%)    | 20   |  |
|               | Sudan                        | 33931 (31280–36875)          | 147.5% (134 to 163.4%)   | 10 109.4 (101.4–118.1)   | 14.9% (9.2 to 21.4%)     | 15   |  |
|               | Global                       | 48987927 (46840150–51316804) | 79.9% (77.6 to 82.4%)    | 599.3 (573–627.3)        | 0% (-1.1 to 1.2%)        |      |  |
|               | North Africa and Middle East | 3096882 (2843657–3481267)    | 127.5% (113.2 to 135.7%) | 552.2 (507.4–619.2)      | 2.4% (-3.3 to 5.7%)      |      |  |
|               | Algeria                      | 202606 (192787–214115)       | 105.1% (98.8 to 112.3%)  | 5 502.8 (479.6–530.1)    | -9.8% (-12 to -7%)       | 6    |  |
|               | Bahrain                      | 8331 (7910–8808)             | 328% (314.1 to 342.3%)   | 19 486.9 (464.6–512.4)   | 4.2% (1.5 to 7.2%)       | 13   |  |
|               | Egypt                        | 337571 (322203–354072)       | 108.8% (103.3 to 115.1%) | 6 396.6 (378.8–415.3)    | 4.3% (1.7 to 7%)         | 14   |  |
|               | Iran (Islamic Republic of)   | 478928 (445665–520699)       | 57.4% (45.6 to 67.5%)    | 2 549.8 (513.4–594.8)    | -27.4% (-34.4 to -22.2%) | 2    |  |
|               | Iraq                         | 261206 (207437–347346)       | 133.2% (110 to 156.2%)   | 10 750.1 (597.1–996.4)   | -21.7% (-31.2 to -12.7%) | 3    |  |
| Jordan        | 39421 (37539–41373)          | 288.7% (279.4 to 299.1%)     | 17 402.8 (385.5–421.6)   | -3.6% (-5.7 to -1.6%)    | 10                       |      |  |
| Kuwait        | 24948 (23651–26471)          | 183.2% (157.4 to 200%)       | 12 549.8 (523.6–578.6)   | -11.6% (-17.4 to -7.7%)  | 5                        |      |  |
| Lebanon       | 28045 (23771–37081)          | 32.2% (7.4 to 57.3%)         | 1 528.1 (446.9–699.7)    | -30.9% (-42.9 to -19.1%) | 1                        |      |  |
| Libya         | 43130 (39583–47930)          | 173.6% (159.7 to 191.3%)     | 11 627.3 (578.7–693.6)   | 11.6% (5.9 to 19.3%)     | 16                       |      |  |
| Morocco       | 179475 (171427–188308)       | 90.7% (85 to 95.5%)          | 3 503.3 (481.4–527.5)    | 2.9% (0.2 to 5%)         | 11                       |      |  |
| Palestine     | 26166 (19893–36241)          | 191.6% (168.6 to 209.5%)     | 13 688.4 (527.1–948.2)   | 11.7% (4.9 to 17.8%)     | 17                       |      |  |
| Oman          | 28135 (26674–29779)          | 196.9% (189 to 204.2%)       | 14 679 (649.3–713.3)     | -5% (-7.1 to -3.1%)      | 8                        |      |  |
| Qatar         | 18974 (17875–20194)          | 560.7% (543.2 to 581%)       | 20 663.9 (631.7–701.2)   | -9.7% (-11.8 to -7.3%)   | 7                        |      |  |
| Saudi Arabia  | 369775 (344765–397295)       | 312.2% (298.2 to 325.3%)     | 18 1070.7 (1008.3–1140)  | 25.5% (22.3 to 28.3%)    | 20                       |      |  |



**Table S13** Disability, prevalence, and incidence of head and spinal injuries in North Africa and Middle East countries

|                      |                              | All Ages                     |                          |    | Age-standardised    |                           |                          |  |
|----------------------|------------------------------|------------------------------|--------------------------|----|---------------------|---------------------------|--------------------------|--|
|                      |                              | Number                       | Percent change           |    | Rate per 100,000    | Percent change            |                          |  |
| Location             | Measure                      | 2019                         | From 1990 to 2019        |    | 2019                | From 1990 to 2019         |                          |  |
| Cause                |                              | Mean (95% UI)                | Mean (95% UI)            |    | Rank                | Mean (95% UI)             | Mean (95% UI)            |  |
| Spinal Injuries      | Syrian Arab Republic         | 111858 (77475–171069)        | 245·1% (153·3 to 392·3%) |    | 16                  | 833·7 (566·3–1291·1)      | 118·2% (55·8 to 220·8%)  |  |
|                      | Tunisia                      | 63641 (60813–66654)          | 103·7% (98·7 to 108·9%)  |    | 4                   | 496 (474·4–519)           | 4% (1·9 to 6·4%)         |  |
|                      | Türkiye                      | 428134 (407264–451661)       | 125·8% (118·6 to 134·6%) |    | 9                   | 471·1 (448·7–496·4)       | 19·6% (16·1 to 24·1%)    |  |
|                      | United Arab Emirates         | 66292 (62592–70302)          | 609% (583·8 to 628·9%)   |    | 21                  | 593·5 (566·6–623·9)       | -4·4% (-6·7 to -2·6%)    |  |
|                      | Yemen                        | 117721 (101299–141736)       | 222·1% (190·6 to 269·5%) |    | 15                  | 524·6 (456·2–626·3)       | 18·9% (7·1 to 35·6%)     |  |
|                      | Afghanistan                  | 182536 (119628–305576)       | 111·9% (34·5 to 251%)    |    | 7                   | 774·5 (486·3–1367)        | -17·9% (-42·8 to 24·8%)  |  |
|                      | Sudan                        | 76842 (69587–87305)          | 118·3% (102·2 to 130·2%) |    | 8                   | 268·5 (244·4–303·9)       | 5·2% (0·6 to 10·1%)      |  |
|                      | Global                       | 20635037 (18925876–23611174) | 81·5% (74·2 to 87·1%)    |    |                     | 253·1 (231·5–290·4)       | 5·8% (2·7 to 9·6%)       |  |
|                      | North Africa and Middle East | 1597740 (989333–3176105)     | 109·7% (55·4 to 149·4%)  |    |                     | 264·3 (165·5–520·5)       | 5% (-19·4 to 21·4%)      |  |
|                      | Algeria                      | 67773 (56104–95193)          | 165·6% (124·4 to 263·4%) |    | 9                   | 160·3 (134–220·9)         | 20·1% (2·5 to 61·7%)     |  |
|                      | Bahrain                      | 2464 (2288–2677)             | 348·4% (320·5 to 373·3%) |    | 18                  | 137·3 (127·8–148·6)       | 16·2% (8·9 to 22·2%)     |  |
|                      | Egypt                        | 91724 (85282–100309)         | 127·2% (115·4 to 145%)   |    | 7                   | 100·1 (93·4–108·4)        | 13·8% (8·4 to 21·8%)     |  |
|                      | Iran (Islamic Republic of)   | 192392 (147592–289632)       | 25·4% (-10·6 to 72·8%)   |    | 2                   | 209·1 (162·9–308·2)       | -37·1% (-55·4 to -15%)   |  |
|                      | Iraq                         | 275649 (100535–735044)       | 95·1% (81·3 to 125·1%)   |    | 5                   | 694·5 (261·2–1838·6)      | -23·3% (-32·7 to -11·6%) |  |
|                      | Jordan                       | 12356 (11428–13714)          | 335·1% (312·7 to 373·3%) |    | 17                  | 117·6 (109·5–128·8)       | 10·9% (5·8 to 19·5%)     |  |
|                      | Kuwait                       | 8925 (7309–12662)            | 257·1% (228·7 to 305%)   |    | 13                  | 178·7 (149·6–246·3)       | 12·6% (3·7 to 28·4%)     |  |
|                      | Lebanon                      | 21407 (8783–61368)           | -14% (-27 to 31·1%)      |    | 1                   | 400·3 (164·1–1148·2)      | -50·2% (-57·6 to -27·9%) |  |
|                      | Libya                        | 20977 (12852–41589)          | 272·9% (206·2 to 346·6%) |    | 14                  | 287 (176·8–572·8)         | 71% (31·2 to 126·2%)     |  |
|                      | Morocco                      | 49136 (45658–53596)          | 81·5% (56·8 to 96·1%)    |    | 4                   | 133·4 (124·2–145·2)       | 4·1% (-6·6 to 10·5%)     |  |
|                      | Palestine                    | 34617 (12023–92970)          | 166% (136·8 to 180·4%)   |    | 10                  | 813·9 (289·2–2164·2)      | 16·1% (1·3 to 24%)       |  |
|                      | Oman                         | 7431 (6863–8020)             | 238·3% (223·6 to 252·6%) |    | 12                  | 160·2 (150·2–171·2)       | 9·3% (5·5 to 13·7%)      |  |
|                      | Qatar                        | 5438 (5015–5874)             | 618% (588·7 to 648%)     |    | 20                  | 171·5 (159·9–184·2)       | -0·5% (-4·4 to 3·4%)     |  |
|                      | Saudi Arabia                 | 99232 (90735–108803)         | 319·1% (298·7 to 340·4%) |    | 15                  | 256·4 (236·7–279·5)       | 27·2% (21·8 to 32·6%)    |  |
| Syrian Arab Republic | 146780 (46392–407902)        | 801·9% (347 to 1631·3%)      |                          | 21 | 1048·9 (332·6–2942) | 567·8% (215·4 to 1184·7%) |                          |  |
| Tunisia              | 16698 (15691–17935)          | 101·7% (91·9 to 110·6%)      |                          | 6  | 129·9 (121·8–139·6) | 8·6% (3·7 to 13·4%)       |                          |  |
| Türkiye              | 139191 (121472–172113)       | 165·6% (139·5 to 213·1%)     |                          | 8  | 151·4 (132·4–187·8) | 47·9% (32·9 to 75·7%)     |                          |  |
| United Arab Emirates | 17277 (16071–18581)          | 593·7% (558·7 to 620·8%)     |                          | 19 | 138·6 (130·6–148·2) | -1·2% (-5·1 to 1·8%)      |                          |  |
| Yemen                | 68611 (34516–160572)         | 333·7% (228·3 to 445·6%)     |                          | 16 | 260 (136·8–594·8)   | 74·1% (25 to 134·1%)      |                          |  |
| Afghanistan          | 229275 (64978–655574)        | 34·5% (-20·8 to 328·2%)      |                          | 3  | 810 (224·5–2351)    | -48% (-65·9 to 41·6%)     |                          |  |
| Sudan                | 88763 (69261–135844)         | 176·8% (154·2 to 208·3%)     |                          | 11 | 274 (218·1–405·4)   | 31·5% (19·6 to 50·5%)     |                          |  |
| <b>Incidence</b>     |                              |                              |                          |    |                     |                           |                          |  |
| Minor TBI            | Global                       | 12668525 (9926564–16020674)  | 29·1% (19·7 to 36·6%)    |    |                     | 163·1 (127·9–206·5)       | -9·7% (-15·7 to -5·6%)   |  |
|                      | North Africa and Middle East | 1008833 (766229–1364308)     | 67·1% (46 to 87·7%)      |    |                     | 161·5 (122·4–220·8)       | -1·1% (-14·1 to 13·2%)   |  |
|                      | Algeria                      | 51280 (40057–64923)          | 37·6% (28·2 to 47·2%)    |    | 9                   | 120·8 (94·6–153·1)        | -11·4% (-16·8 to -5·4%)  |  |



**Table S13** Disability, prevalence, and incidence of head and spinal injuries in North Africa and Middle East countries

| Location            |                              | All Ages                     |                          |      | Age-standardised    |                         |                          |  |
|---------------------|------------------------------|------------------------------|--------------------------|------|---------------------|-------------------------|--------------------------|--|
|                     |                              | Number                       | Percent change           |      | Rate per 100,000    | Percent change          |                          |  |
| Cause               | Measure                      | 2019                         | From 1990 to 2019        |      | 2019                | From 1990 to 2019       |                          |  |
|                     |                              | Mean (95% UI)                | Mean (95% UI)            | Rank | Mean (95% UI)       | Mean (95% UI)           | Rank                     |  |
| Moderate/Severe TBI | Bahrain                      | 1695 (1320–2134)             | 157.9% (138.2 to 177.1%) |      | 15                  | 123 (96.6–156.2)        | 5.2% (-1.9 to 13%)       |  |
|                     | Egypt                        | 106781 (83639–134451)        | 84.5% (71.7 to 99.2%)    |      | 10                  | 103 (80.9–129.6)        | 7.3% (0.5 to 15.6%)      |  |
|                     | Iran (Islamic Republic of)   | 102334 (79869–131127)        | -36.8% (-57.3 to -16.9%) |      | 1                   | 120.7 (94.2–154.7)      | -54.9% (-70 to -40.3%)   |  |
|                     | Iraq                         | 79695 (61603–103004)         | 85.4% (54.6 to 111.5%)   |      | 11                  | 172.9 (133.1–222.5)     | -24.1% (-36.2 to -14.2%) |  |
|                     | Jordan                       | 13358 (10382–17077)          | 184.5% (166.8 to 203.9%) |      | 16                  | 107 (83.2–136.3)        | -3.2% (-8.6 to 2.9%)     |  |
|                     | Kuwait                       | 6024 (4607–7739)             | -31% (-67.8 to 33.6%)    |      | 2                   | 132.2 (102.6–168.1)     | -69.6% (-85.6 to -42.1%) |  |
|                     | Lebanon                      | 6246 (4861–8007)             | -28.5% (-59.5 to 8.4%)   |      | 3                   | 121.8 (94.8–155.1)      | -51.8% (-72.3 to -28.3%) |  |
|                     | Libya                        | 14238 (10426–21063)          | 143.2% (88.7 to 262.8%)  |      | 14                  | 203.8 (147.6–306.1)     | 55.9% (19.3 to 138.8%)   |  |
|                     | Morocco                      | 47920 (37277–61368)          | 33.2% (24.6 to 42.7%)    |      | 8                   | 131.1 (102–167.6)       | 0.2% (-5.8 to 6.7%)      |  |
|                     | Palestine                    | 6952 (5430–8746)             | 26.3% (-27.5 to 91.7%)   |      | 5                   | 127.9 (100.2–160.9)     | -44.7% (-67.6 to -18.1%) |  |
|                     | Oman                         | 7893 (6112–10038)            | 130.7% (110.9 to 151.6%) |      | 13                  | 160.4 (125.9–202.6)     | -6.3% (-12.8 to 0.2%)    |  |
|                     | Qatar                        | 5894 (4431–7793)             | 507.3% (454.1 to 560%)   |      | 20                  | 172.2 (131.9–224.1)     | -8.8% (-15.3 to -2%)     |  |
|                     | Saudi Arabia                 | 117133 (86100–157862)        | 197.8% (166.1 to 230.5%) |      | 17                  | 284.5 (210.9–377.8)     | 22.1% (11.4 to 32%)      |  |
|                     | Syrian Arab Republic         | 30687 (19644–53828)          | 106.8% (42 to 263%)      |      | 12                  | 235 (142.5–434.7)       | 128.9% (47.1 to 316.5%)  |  |
|                     | Tunisia                      | 14210 (11061–18067)          | 26.7% (17.9 to 35.4%)    |      | 6                   | 125.3 (97.1–160.4)      | 1% (-4.9 to 7.5%)        |  |
|                     | Türkiye                      | 97591 (76100–124436)         | 31.9% (17.9 to 47.6%)    |      | 7                   | 120.6 (94.2–153.3)      | 4.8% (-5.2 to 16.7%)     |  |
|                     | United Arab Emirates         | 14587 (11242–18651)          | 361.1% (328.6 to 396.4%) |      | 18                  | 145.1 (114.4–184)       | -6.6% (-10.9 to -1.9%)   |  |
|                     | Yemen                        | 114021 (60442–238096)        | 588.9% (261.5 to 1352%)  |      | 21                  | 320.2 (173.7–647.9)     | 178.2% (50.4 to 483.7%)  |  |
|                     | Afghanistan                  | 117717 (64739–236555)        | 447.1% (322 to 601.1%)   |      | 19                  | 361.4 (178.7–782.8)     | 107.2% (40.1 to 196.8%)  |  |
|                     | Sudan                        | 51552 (39111–67761)          | 6.8% (-44.6 to 69.3%)    |      | 4                   | 119.6 (91.7–155.6)      | -46.5% (-71.3 to -16.5%) |  |
|                     | Global                       | 14492183 (12603272–16571211) | 60.4% (54.5 to 65.9%)    |      |                     | 182.7 (158.9–209.8)     | -1.4% (-4 to 0.7%)       |  |
|                     | North Africa and Middle East | 902661 (790629–1024620)      | 33% (10.3 to 57%)        |      |                     | 157.1 (137.9–179.1)     | -25% (-37.3 to -12.1%)   |  |
|                     | Algeria                      | 58539 (51622–65734)          | 51.7% (41.7 to 61.1%)    |      | 3                   | 145 (128.3–162.5)       | -14.5% (-18.5 to -10.3%) |  |
|                     | Bahrain                      | 1911 (1683–2162)             | 177.1% (156.5 to 197.5%) |      | 15                  | 136 (120–153.1)         | -5.5% (-10.2 to -0.5%)   |  |
|                     | Egypt                        | 115686 (101649–130554)       | 86.7% (75.9 to 97.2%)    |      | 10                  | 126.7 (111.2–143.2)     | 3.7% (-1.1 to 8.8%)      |  |
|                     | Iran (Islamic Republic of)   | 122435 (107746–139494)       | -61.6% (-73.6 to -43.4%) |      | 1                   | 146.8 (129.6–166.5)     | -74% (-81.9 to -62.1%)   |  |
|                     | Iraq                         | 60597 (53849–68171)          | 128.5% (110.5 to 141.9%) |      | 13                  | 148 (131.9–165.3)       | -11.7% (-17.4 to -7.3%)  |  |
|                     | Jordan                       | 12681 (11225–14283)          | 197.7% (181.1 to 214.4%) |      | 16                  | 115.9 (102.9–129.2)     | -8.3% (-12.5 to -3.8%)   |  |
|                     | Kuwait                       | 6513 (5745–7316)             | 59% (7.2 to 106.8%)      |      | 5                   | 147.9 (130.9–164.5)     | -36.9% (-56.1 to -20.4%) |  |
|                     | Lebanon                      | 6537 (5806–7346)             | 28% (2 to 48.4%)         |      | 2                   | 126.1 (111.8–141.2)     | -24% (-38.7 to -12.5%)   |  |
|                     | Libya                        | 12538 (10974–14700)          | 108.8% (90.7 to 134.3%)  |      | 11                  | 180.8 (159–210.7)       | 10.2% (1.7 to 23.9%)     |  |
|                     | Morocco                      | 54268 (47976–60843)          | 55% (47 to 63.1%)        |      | 4                   | 154.8 (136.6–173.5)     | 3% (-1.3 to 7.1%)        |  |
| Palestine           | 5681 (5040–6372)             | 113.9% (63.7 to 151.3%)      |                          | 12   | 126.6 (112.6–141.1) | -10.4% (-29 to 3.1%)    |                          |  |
| Oman                | 9225 (7977–10563)            | 136.4% (118.7 to 154%)       |                          | 14   | 225.6 (197.4–254.5) | -7.8% (-13.2 to -2.1%)  |                          |  |
| Qatar               | 5995 (5235–6777)             | 494.4% (457.7 to 532.6%)     |                          | 21   | 201.8 (178.6–226.2) | -10.8% (-15.1 to -5.7%) |                          |  |
| Saudi Arabia        | 125089 (108626–142125)       | 251% (230.8 to 271.9%)       |                          | 18   | 343.4 (299.5–385.7) | 28.7% (23.3 to 33.6%)   |                          |  |

**Table S13** Disability, prevalence, and incidence of head and spinal injuries in North Africa and Middle East countries

| Location                            |                              | All Ages                 |                           |    | Age-standardised |                       |                           |  |
|-------------------------------------|------------------------------|--------------------------|---------------------------|----|------------------|-----------------------|---------------------------|--|
|                                     |                              | Number                   | Percent change            |    | Rate per 100,000 | Percent change        |                           |  |
| Cause                               | Measure                      | 2019                     | From 1990 to 2019         |    | 2019             | From 1990 to 2019     |                           |  |
|                                     |                              | Mean (95% UI)            | Mean (95% UI)             |    | Rank             | Mean (95% UI)         | Mean (95% UI)             |  |
| Spinal cord lesion at neck level    | Syrian Arab Republic         | 22143 (17365–31567)      | 77.7% (44.4 to 150.7%)    |    | 8                | 178.5 (129.9–286.4)   | 63.9% (21.8 to 156.4%)    |  |
|                                     | Tunisia                      | 17549 (15521–19755)      | 59.1% (49.6 to 69.2%)     |    | 6                | 148.4 (130.9–166.6)   | 5.4% (0.9 to 9.9%)        |  |
|                                     | Türkiye                      | 121665 (106815–137945)   | 80.3% (66.7 to 93.9%)     |    | 9                | 144.5 (127–163.6)     | 19.9% (12.1 to 27.7%)     |  |
|                                     | United Arab Emirates         | 18596 (16004–21565)      | 450.9% (410.4 to 495.7%)  |    | 20               | 184.6 (162.9–208.5)   | -8.4% (-12.1 to -4.7%)    |  |
|                                     | Yemen                        | 50877 (39076–74712)      | 238.1% (167.8 to 390.1%)  |    | 17               | 175.5 (138.7–249.2)   | 29.8% (5.1 to 82.7%)      |  |
|                                     | Afghanistan                  | 55027 (40875–86053)      | 317.1% (246.2 to 444.4%)  |    | 19               | 210.5 (135.1–378.6)   | 64.6% (16.1 to 154.3%)    |  |
|                                     | Sudan                        | 18192 (15010–21945)      | 65.7% (20.5 to 95.9%)     |    | 7                | 52.4 (43.3–62.4)      | -19.7% (-40 to -6.5%)     |  |
|                                     | Global                       | 492278 (354297–675136)   | 43.3% (9.8 to 67.6%)      |    |                  | 6.2 (4.5–8.6)         | -10.6% (-27.7 to 1%)      |  |
|                                     | North Africa and Middle East | 37699 (20760–81071)      | 55.3% (-12.6 to 145.9%)   |    |                  | 6.6 (3.6–14.3)        | -13.3% (-54 to 45.7%)     |  |
|                                     | Algeria                      | 1032 (776–1353)          | 62.5% (49.5 to 77.2%)     |    | 10               | 2.5 (1.9–3.3)         | -7.4% (-15.1 to 0.6%)     |  |
|                                     | Bahrain                      | 34 (26–45)               | 201.5% (172.1 to 230.5%)  |    | 13               | 2.5 (1.9–3.2)         | 4.2% (-6.1 to 14%)        |  |
|                                     | Egypt                        | 2335 (1712–3223)         | 126.4% (96.4 to 189.9%)   |    | 11               | 2.5 (1.8–3.4)         | 23.4% (8.1 to 56.2%)      |  |
|                                     | Iran (Islamic Republic of)   | 2229 (1676–2908)         | -82% (-91.4 to -59.8%)    |    | 2                | 2.7 (2–3.5)           | -89.4% (-95.1 to -75.6%)  |  |
|                                     | Iraq                         | 2059 (1241–3940)         | 41.9% (13.7 to 91.4%)     |    | 6                | 4.8 (2.9–8.9)         | -41.2% (-52.2 to -22.7%)  |  |
|                                     | Jordan                       | 241 (186–307)            | 220.9% (198.2 to 245.4%)  |    | 14               | 2.2 (1.7–2.8)         | -1.1% (-8 to 6.1%)        |  |
|                                     | Kuwait                       | 118 (89–153)             | -82.1% (-93.6 to -37.9%)  |    | 1                | 2.7 (2–3.4)           | -92.1% (-97.3 to -73.4%)  |  |
|                                     | Lebanon                      | 130 (100–168)            | -72.6% (-89.2 to -22.9%)  |    | 3                | 2.5 (1.9–3.2)         | -82.3% (-93 to -51.3%)    |  |
|                                     | Libya                        | 637 (306–1483)           | 542.7% (203.5 to 1469.4%) |    | 17               | 9.4 (4.5–22)          | 251.6% (64.1 to 771.8%)   |  |
|                                     | Morocco                      | 976 (728–1258)           | 61.2% (51 to 72.8%)       |    | 9                | 2.8 (2.1–3.6)         | 8% (1.4 to 14.9%)         |  |
|                                     | Palestine                    | 148 (108–218)            | -53.6% (-75.6 to 17.5%)   |    | 4                | 3.1 (2.3–4.5)         | -78.2% (-88.7 to -46.3%)  |  |
| Oman                                | 151 (111–204)                | 151.3% (130.4 to 178.4%) |                           | 12 | 3.7 (2.7–5)      | -1.7% (-10.1 to 8%)   |                           |  |
| Qatar                               | 109 (83–141)                 | 543.4% (481.6 to 605.7%) |                           | 18 | 3.6 (2.7–4.7)    | -3.9% (-12.8 to 4.7%) |                           |  |
| Saudi Arabia                        | 2285 (1700–3042)             | 260.3% (233.4 to 287.8%) |                           | 15 | 6.2 (4.5–8.3)    | 34.4% (25.8 to 43.2%) |                           |  |
| Spinal cord lesion below neck level | Syrian Arab Republic         | 2444 (766–6813)          | 829.2% (215.8 to 2114.1%) |    | 19               | 23.3 (6.6–66.7)       | 960.5% (221.7 to 2587.9%) |  |
|                                     | Tunisia                      | 310 (231–413)            | 60.3% (45.7 to 75.1%)     |    | 8                | 2.6 (2–3.5)           | 7.6% (-1.7 to 16.9%)      |  |
|                                     | Türkiye                      | 2391 (1791–3134)         | 45.4% (3.5 to 87.6%)      |    | 7                | 2.9 (2.1–3.8)         | 1.3% (-25 to 26.1%)       |  |
|                                     | United Arab Emirates         | 306 (225–415)            | 456.4% (419.8 to 497%)    |    | 16               | 3.1 (2.3–4.1)         | -3.7% (-9.6 to 2.1%)      |  |
|                                     | Yemen                        | 8190 (2414–23485)        | 3053.8% (811.8 to 8943%)  |    | 21               | 24 (7.4–68.4)         | 959.8% (223.3 to 3055.5%) |  |
|                                     | Afghanistan                  | 9804 (2660–28962)        | 831.4% (559.5 to 1047.8%) |    | 20               | 41.7 (9.8–129.8)      | 369% (166 to 559.6%)      |  |
|                                     | Sudan                        | 1728 (1252–2364)         | -26.1% (-69.7 to 60.7%)   |    | 5                | 4.8 (3.4–6.6)         | -60.7% (-83.9 to -18.7%)  |  |
|                                     | Global                       | 416722 (289713–584687)   | 65.5% (48.9 to 78.9%)     |    |                  | 5.3 (3.7–7.4)         | -0.1% (-8.4 to 5.5%)      |  |
|                                     | North Africa and Middle East | 15077 (11480–19576)      | -18.2% (-57.7 to 42.1%)   |    |                  | 2.6 (2–3.4)           | -57.2% (-78.4 to -24.2%)  |  |
|                                     | Algeria                      | 903 (671–1192)           | 62.4% (48 to 77.6%)       |    | 6                | 2.2 (1.7–2.9)         | -5.9% (-14 to 1.6%)       |  |
|                                     | Bahrain                      | 30 (23–39)               | 205.3% (175.9 to 235%)    |    | 16               | 2.2 (1.6–2.8)         | 7.3% (-2.8 to 16.1%)      |  |
|                                     | Egypt                        | 1725 (1285–2343)         | 93.4% (80.5 to 107.4%)    |    | 8                | 1.8 (1.4–2.5)         | 7.8% (1.2 to 15.1%)       |  |
|                                     | Iran (Islamic Republic of)   | 1935 (1454–2512)         | -84.4% (-93.2 to -59.6%)  |    | 1                | 2.3 (1.7–3)           | -91% (-96.2 to -76.1%)    |  |
|                                     | Iraq                         | 1016 (782–1311)          | 147.2% (134.3 to 161.8%)  |    | 12               | 2.4 (1.9–3.1)         | -4.5% (-9.2 to 0.5%)      |  |
|                                     | Jordan                       | 214 (164–273)            | 216.7% (193.8 to 239.8%)  |    | 17               | 1.9 (1.5–2.4)         | -1.1% (-8.1 to 5.3%)      |  |
|                                     | Kuwait                       | 104 (79–134)             | 151.7% (132 to 171.8%)    |    | 13               | 2.3 (1.8–3)           | -2.7% (-9.8 to 3.7%)      |  |
|                                     | Lebanon                      | 113 (88–144)             | 59.3% (34.4 to 87.4%)     |    | 5                | 2.2 (1.7–2.8)         | -4.9% (-20.5 to 11.3%)    |  |
|                                     | Libya                        | 178 (134–233)            | 105.8% (85.6 to 136.4%)   |    | 9                | 2.6 (1.9–3.4)         | 13% (2.7 to 28.1%)        |  |
|                                     | Morocco                      | 860 (652–1120)           | 59.1% (48.6 to 71.5%)     |    | 4                | 2.4 (1.8–3.2)         | 8% (1.6 to 14.8%)         |  |

**Table S13** Disability, prevalence, and incidence of head and spinal injuries in North Africa and Middle East countries

|                              |                              | All Ages                     |                          |    | Age-standardised     |                          |                          |  |
|------------------------------|------------------------------|------------------------------|--------------------------|----|----------------------|--------------------------|--------------------------|--|
|                              |                              | Number                       | Percent change           |    | Rate per 100,000     | Percent change           |                          |  |
| Location                     | Measure                      | 2019                         | From 1990 to 2019        |    | 2019                 | From 1990 to 2019        |                          |  |
| Cause                        | Measure                      | Mean (95% UI)                | Mean (95% UI)            |    | Rank                 | Mean (95% UI)            | Mean (95% UI)            |  |
| Head Injuries                | Palestine                    | 105 (83–133)                 | 182.1% (162.2 to 208.6%) |    | 15                   | 2.3 (1.8–2.9)            | 15.4% (8 to 25.7%)       |  |
|                              | Oman                         | 128 (94–172)                 | 154.3% (130.3 to 180.2%) |    | 14                   | 3.1 (2.3–4.3)            | 0.9% (-8.1 to 10.2%)     |  |
|                              | Qatar                        | 95 (72–123)                  | 552.3% (487.8 to 614.1%) |    | 21                   | 3.1 (2.3–4.1)            | -2.3% (-11.2 to 6.5%)    |  |
|                              | Saudi Arabia                 | 2019 (1500–2668)             | 248.3% (220.3 to 275.4%) |    | 19                   | 5.5 (4–7.3)              | 32% (23.1 to 40.7%)      |  |
|                              | Syrian Arab Republic         | 317 (243–414)                | 50.5% (35.9 to 73.6%)    |    | 2                    | 2.4 (1.8–3.1)            | 34% (17.3 to 67.3%)      |  |
|                              | Tunisia                      | 263 (195–350)                | 53.3% (38.3 to 70%)      |    | 3                    | 2.2 (1.7–3)              | 4.4% (-4.9 to 13.8%)     |  |
|                              | Türkiye                      | 2001 (1516–2619)             | 85% (61.4 to 115.1%)     |    | 7                    | 2.4 (1.8–3.1)            | 25.7% (10.9 to 43.3%)    |  |
|                              | United Arab Emirates         | 256 (189–339)                | 443.4% (407.2 to 485.6%) |    | 20                   | 2.6 (1.9–3.5)            | -3.2% (-9.1 to 2.6%)     |  |
|                              | Yemen                        | 573 (436–752)                | 143.8% (131.1 to 156.5%) |    | 11                   | 2 (1.5–2.6)              | 0.1% (-4.8 to 5%)        |  |
|                              | Afghanistan                  | 648 (506–815)                | 245.1% (222 to 274.5%)   |    | 18                   | 2 (1.6–2.5)              | 10.1% (1.5 to 24.5%)     |  |
|                              | Sudan                        | 1577 (1140–2213)             | 127.2% (112.6 to 144.4%) |    | 10                   | 4.3 (3.1–6.1)            | 9.1% (2.2 to 16.9%)      |  |
|                              | Global                       | 27160708 (23357251–31415052) | 44.1% (36.9 to 49.7%)    |    |                      | 345.9 (297.8–401)        | -5.5% (-8.9 to -3%)      |  |
|                              | North Africa and Middle East | 1911495 (1624871–2305162)    | 49% (31.3 to 67.4%)      |    |                      | 318.6 (271.9–382.4)      | -14.5% (-24.8 to -4%)    |  |
|                              | Algeria                      | 109818 (95425–126366)        | 44.8% (36.1 to 53.2%)    |    | 7                    | 265.8 (231.2–305.6)      | -13.1% (-17.2 to -8.7%)  |  |
|                              | Bahrain                      | 3605 (3131–4160)             | 167.7% (150.1 to 185%)   |    | 15                   | 259 (224.4–299.4)        | -0.7% (-5.5 to 4.4%)     |  |
|                              | Egypt                        | 222467 (191763–257387)       | 85.6% (74.8 to 96.2%)    |    | 10                   | 229.8 (199.1–263.8)      | 5.3% (0.5 to 10.6%)      |  |
|                              | Iran (Islamic Republic of)   | 224769 (194553–259552)       | -53.3% (-64.7 to -38.8%) |    | 1                    | 267.5 (232.3–308.7)      | -67.8% (-75.7 to -58%)   |  |
|                              | Iraq                         | 140292 (119415–166064)       | 101.8% (77.4 to 121.4%)  |    | 12                   | 320.9 (275.6–375.8)      | -18.8% (-27.5 to -12.2%) |  |
|                              | Jordan                       | 26039 (22338–30461)          | 190.8% (175.3 to 206.3%) |    | 16                   | 223 (193.7–258.6)        | -5.9% (-10 to -1.2%)     |  |
|                              | Kuwait                       | 12537 (10826–14617)          | -2.2% (-45.2 to 51.3%)   |    | 3                    | 280.1 (242.7–323.8)      | -58.2% (-76 to -37.2%)   |  |
|                              | Lebanon                      | 12783 (11084–14829)          | -7.7% (-38.2 to 21.4%)   |    | 2                    | 247.9 (215.1–288.1)      | -40.8% (-59.4 to -23.5%) |  |
|                              | Libya                        | 26776 (22306–34151)          | 125.8% (95.7 to 182%)    |    | 13                   | 384.6 (320.5–493.9)      | 30.4% (12.6 to 66%)      |  |
|                              | Morocco                      | 102188 (88863–118831)        | 44% (37 to 51.2%)        |    | 6                    | 285.9 (249.6–331.2)      | 1.7% (-2.5 to 5.9%)      |  |
|                              | Palestine                    | 12633 (10861–14734)          | 54.8% (1.8 to 106.4%)    |    | 8                    | 254.5 (221–295.7)        | -31.7% (-53.3 to -12.3%) |  |
|                              | Oman                         | 17119 (14700–19857)          | 133.7% (117.4 to 152.2%) |    | 14                   | 386 (336.3–438.3)        | -7.2% (-11.9 to -2%)     |  |
|                              | Qatar                        | 11890 (10081–14150)          | 500.7% (462.3 to 540.7%) |    | 21                   | 374 (324.5–433.9)        | -9.9% (-14.5 to -5.1%)   |  |
|                              | Saudi Arabia                 | 242222 (207011–286739)       | 223.1% (200.7 to 246.1%) |    | 17                   | 627.9 (541.6–735)        | 25.6% (19.3 to 32.2%)    |  |
|                              | Syrian Arab Republic         | 52830 (39544–76766)          | 93.5% (49.1 to 182.8%)   |    | 11                   | 413.5 (297.4–625.7)      | 95.4% (43.6 to 192.7%)   |  |
|                              | Tunisia                      | 31759 (27629–36591)          | 42.7% (34.4 to 51.4%)    |    | 5                    | 273.7 (237.6–316.6)      | 3.3% (-1 to 8.1%)        |  |
|                              | Türkiye                      | 219256 (191556–254991)       | 55% (43.4 to 66.5%)      |    | 9                    | 265.1 (231.6–308)        | 12.5% (5.2 to 20%)       |  |
|                              | United Arab Emirates         | 33183 (28455–38552)          | 407.5% (374.1 to 445.5%) |    | 19                   | 329.7 (286.2–378.1)      | -7.6% (-11.2 to -3.8%)   |  |
|                              | Yemen                        | 164898 (108336–287669)       | 421.8% (240.8 to 822.5%) |    | 20                   | 495.8 (338.5–840.9)      | 98.1% (35.1 to 236.3%)   |  |
| Afghanistan                  | 172744 (114294–298507)       | 397.7% (305.3 to 512.9%)     |                          | 18 | 571.9 (346.5–1015.1) | 89.2% (38.3 to 157.5%)   |                          |  |
| Sudan                        | 69744 (56092–87454)          | 17.7% (-31.8 to 69.8%)       |                          | 4  | 171.9 (140.9–212.8)  | -40.5% (-64.4 to -16.4%) |                          |  |
| Global                       | 909001 (706953–1156410)      | 52.7% (30.4 to 69.9%)        |                          |    | 11.5 (9–14.7)        | -6.1% (-17.3 to 1.5%)    |                          |  |
| North Africa and Middle East | 52776 (34780–97680)          | 23.6% (-24.7 to 91.9%)       |                          |    | 9.2 (6–17)           | -32.7% (-60.7 to 8.9%)   |                          |  |
| Algeria                      | 1935 (1588–2368)             | 62.5% (50.5 to 74.2%)        |                          | 9  | 4.8 (3.9–5.8)        | -6.7% (-13.1 to -0.4%)   |                          |  |
| Bahrain                      | 65 (53–78)                   | 203.2% (178.6 to 227.1%)     |                          | 13 | 4.6 (3.8–5.6)        | 5.6% (-2.2 to 13.4%)     |                          |  |

**Table S13** Disability, prevalence, and incidence of head and spinal injuries in North Africa and Middle East countries

| Location |                            | All Ages           |                           | Age-standardised |                   |                           |      |
|----------|----------------------------|--------------------|---------------------------|------------------|-------------------|---------------------------|------|
|          |                            | Number             | Percent change            | Rate per 100,000 | Percent change    |                           |      |
| Cause    | Measure                    | 2019               | From 1990 to 2019         | 2019             | From 1990 to 2019 |                           |      |
|          |                            | Mean (95% UI)      | Mean (95% UI)             | Rank             | Mean (95% UI)     | Mean (95% UI)             | Rank |
|          | Egypt                      | 4060 (3281–5084)   | 111·1% (92 to 145·7%)     | 11               | 4·3 (3·5–5·4)     | 16·3% (6·6 to 33·8%)      | 16   |
|          | Iran (Islamic Republic of) | 4164 (3373–5116)   | -83·2% (-90·8 to -68·2%)  | 1                | 5 (4·1–6·1)       | -90·2% (-94·8 to -81·2%)  | 1    |
|          | Iraq                       | 3076 (2202–4940)   | 65·2% (31·9 to 112·4%)    | 10               | 7·2 (5·2–11·3)    | -32·4% (-44·7 to -15·8%)  | 6    |
|          | Jordan                     | 456 (379–543)      | 218·9% (200·2 to 239·5%)  | 14               | 4·1 (3·4–4·9)     | -1·1% (-6·7 to 4·5%)      | 10   |
|          | Kuwait                     | 222 (183–267)      | -68·3% (-87·9 to -5·2%)   | 2                | 5 (4·1–6)         | -86·3% (-94·9 to -60·5%)  | 2    |
|          | Lebanon                    | 244 (201–294)      | -55·5% (-81·3 to 1·8%)    | 3                | 4·7 (3·9–5·7)     | -71·5% (-87·7 to -37·5%)  | 3    |
|          | Libya                      | 815 (471–1647)     | 338·9% (157·3 to 790%)    | 16               | 11·9 (6·8–24·4)   | 141·6% (40·5 to 405·8%)   | 18   |
|          | Morocco                    | 1836 (1507–2226)   | 60·2% (51·6 to 69·8%)     | 7                | 5·2 (4·3–6·3)     | 8% (2·9 to 13·7%)         | 14   |
|          | Palestine                  | 254 (207–324)      | -29% (-65·1 to 58·3%)     | 4                | 5·4 (4·4–6·8)     | -66·9% (-83·5 to -29·6%)  | 4    |
|          | Oman                       | 279 (226–355)      | 152·6% (134·3 to 174·8%)  | 12               | 6·8 (5·4–8·5)     | -0·5% (-7·3 to 6·9%)      | 11   |
|          | Qatar                      | 204 (168–248)      | 547·5% (494·8 to 597%)    | 19               | 6·7 (5·5–8·1)     | -3·2% (-10·3 to 3·5%)     | 9    |
|          | Saudi Arabia               | 4304 (3458–5275)   | 254·6% (231·5 to 279·4%)  | 15               | 11·7 (9·3–14·4)   | 33·3% (26·1 to 40·4%)     | 17   |
|          | Syrian Arab Republic       | 2762 (1061–7102)   | 482·8% (137·9 to 1262·7%) | 18               | 25·7 (8·8–69·2)   | 548·3% (131·1 to 1510·3%) | 21   |
|          | Tunisia                    | 574 (467–697)      | 57% (45·4 to 69·3%)       | 6                | 4·9 (4–6)         | 6·1% (-0·9 to 13%)        | 13   |
|          | Türkiye                    | 4391 (3619–5398)   | 61·1% (27·9 to 89·6%)     | 8                | 5·3 (4·3–6·5)     | 11·1% (-9 to 28·1%)       | 15   |
|          | United Arab Emirates       | 562 (454–695)      | 450·4% (416·7 to 487·7%)  | 17               | 5·6 (4·6–7)       | -3·5% (-8·2 to 1·3%)      | 8    |
|          | Yemen                      | 8763 (2941–24072)  | 1671·3% (510 to 4727·5%)  | 21               | 26 (9·3–70·3)     | 510·5% (122·1 to 1565%)   | 20   |
|          | Afghanistan                | 10452 (3261–29635) | 742·6% (464 to 974%)      | 20               | 43·7 (11·8–131·7) | 308·3% (115·4 to 502·2%)  | 19   |
|          | Sudan                      | 3305 (2618–4167)   | 8·9% (-48·2 to 87·2%)     | 5                | 9·1 (7·2–11·5)    | -43·6% (-72·1 to -7·9%)   | 5    |

TBI, traumatic brain injury; UI uncertainty interval; YLDs, Years Lived with Disability. Data in parentheses are 95% uncertainty intervals. Count data are absolute numbers and percentage data are rounded to one decimal place, and sex ratio is rounded to two decimal place. Percentages and number of YLDs, prevalent cases, and incident cases are not mutually exclusive: the sum of percentages and number of YLDs in the columns exceeds the totals for all injuries combined because of overlap between various causes. Rank numbers show the ranks of countries with the highest decline or lowest rise (rank 1) to the highest rise (rank 21) in the number or rate of the specific injury during 1990–2019.

***Table S14 Regional incidence, prevalence, and disability of head and spinal injuries in the world and in North Africa and Middle East countries***  
(NEXT PAGE)

**Table S14** Incidence, prevalence, and disability of head and spinal injuries in the world and in North Africa and Middle East countries

|                                     |            | All Ages                  |                          | Age-standardised    |                          |           |
|-------------------------------------|------------|---------------------------|--------------------------|---------------------|--------------------------|-----------|
|                                     |            | Number (thousand)         | Percent change           | Rate per 100,000    | Percent change           | Sex ratio |
| Location                            |            | 2019                      | From 1990 to 2019        | 2019                | From 1990 to 2019        | 2019      |
| Cause                               | Measure    | Mean (95% UI)             | Mean (95% UI)            | Mean (95% UI)       | Mean (95% UI)            | F:M       |
| <b>Global</b>                       |            |                           |                          |                     |                          |           |
| Minor TBI                           | Incidence  | 12668.5 (9926.6–16020.7)  | 29.1% (19.7 to 36.6%)    | 163.1 (127.9–206.5) | -9.7% (-15.7 to -5.6%)   | 0.59      |
|                                     | Prevalence | 11482.6 (10758.8–12351.8) | 71.3% (67.8 to 74.5%)    | 141.9 (133–152.7)   | -4.4% (-5.7 to -3.2%)    | 0.62      |
|                                     | YLDs       | 1366.9 (963.6–1833.6)     | 70.5% (66.9 to 74%)      | 16.9 (11.9–22.7)    | -4.4% (-5.7 to -3%)      | 0.61      |
| Moderate/Severe TBI                 | Incidence  | 14492.2 (12603.3–16571.2) | 60.4% (54.5 to 65.9%)    | 182.7 (158.9–209.8) | -1.4% (-4 to 0.7%)       | 0.61      |
|                                     | Prevalence | 37505.3 (35614.7–39599.6) | 82.8% (80 to 85.7%)      | 457.4 (434.3–482.6) | 1.4% (0.1 to 2.8%)       | 0.59      |
|                                     | YLDs       | 5710 (4035.5–7733)        | 81.1% (78.5 to 84%)      | 69.7 (49.3–94.3)    | 1.3% (0 to 2.7%)         | 0.58      |
| Spinal cord lesion at neck level    | Incidence  | 492.3 (354.3–675.1)       | 43.3% (9.8 to 67.6%)     | 6.2 (4.5–8.6)       | -10.6% (-27.7 to 1%)     | 0.77      |
|                                     | Prevalence | 10857.6 (9490.8–13911.8)  | 82.9% (69.7 to 91.1%)    | 133.3 (116.3–171.1) | 8.7% (2.8 to 14.7%)      | 0.74      |
|                                     | YLDs       | 4253.1 (3040.2–5853.3)    | 72.9% (59.4 to 81.2%)    | 52.3 (37.3–72.1)    | 4.1% (-2 to 10.1%)       | 0.72      |
| Spinal cord lesion below neck level | Incidence  | 416.7 (289.7–584.7)       | 65.5% (48.9 to 78.9%)    | 5.3 (3.7–7.4)       | -0.1% (-8.4 to 5.5%)     | 0.87      |
|                                     | Prevalence | 9777.5 (9208.5–10448.7)   | 80.1% (76.1 to 84.5%)    | 119.7 (112.8–128)   | 2.8% (0.9 to 5.1%)       | 0.81      |
|                                     | YLDs       | 1947.7 (1370.6–2571.5)    | 51.1% (44.7 to 57.6%)    | 23.9 (16.8–31.5)    | -12% (-15.4 to -8.5%)    | 0.78      |
| Head Injuries                       | Incidence  | 27160.7 (23357.3–31415.1) | 44.1% (36.9 to 49.7%)    | 345.9 (297.8–401)   | -5.5% (-8.9 to -3%)      | 0.60      |
|                                     | Prevalence | 48987.9 (46840.1–51316.8) | 79.9% (77.6 to 82.4%)    | 599.3 (573–627.3)   | 0% (-1.1 to 1.2%)        | 0.60      |
|                                     | YLDs       | 7076.9 (4997.9–9588.1)    | 79% (76.6 to 81.5%)      | 86.5 (61.1–117.2)   | 0.1% (-1 to 1.3%)        | 0.59      |
| Spinal Injuries                     | Incidence  | 909 (707–1156.4)          | 52.7% (30.4 to 69.9%)    | 11.5 (9–14.7)       | -6.1% (-17.3 to 1.5%)    | 0.82      |
|                                     | Prevalence | 20635 (18925.9–23611.2)   | 81.5% (74.2 to 87.1%)    | 253.1 (231.5–290.4) | 5.8% (2.7 to 9.6%)       | 0.77      |
|                                     | YLDs       | 6200.8 (4465.3–8156.2)    | 65.4% (56.3 to 72%)      | 76.2 (54.8–100.4)   | -1.5% (-5.6 to 3.3%)     | 0.74      |
| <b>North Africa and Middle East</b> |            |                           |                          |                     |                          |           |
| Minor TBI                           | Incidence  | 1008.8 (766.2–1364.3)     | 67.1% (46 to 87.7%)      | 161.5 (122.4–220.8) | -1.1% (-14.1 to 13.2%)   | 0.58      |
|                                     | Prevalence | 720.4 (591.3–955.6)       | 119.7% (98.8 to 132.8%)  | 129 (106.2–170.2)   | 0.2% (-9.6 to 6.3%)      | 0.58      |
|                                     | YLDs       | 86.6 (60.6–118.7)         | 120.2% (98.7 to 134.7%)  | 15.4 (10.9–21)      | 0.7% (-9.4 to 7.1%)      | 0.57      |
| Moderate/Severe TBI                 | Incidence  | 902.7 (790.6–1024.6)      | 33% (10.3 to 57%)        | 157.1 (137.9–179.1) | -25% (-37.3 to -12.1%)   | 0.58      |
|                                     | Prevalence | 2376.5 (2188.4–2700.6)    | 130% (116.8 to 138.2%)   | 423.2 (390.4–479.2) | 3.1% (-2 to 6.1%)        | 0.53      |
|                                     | YLDs       | 366.4 (262.9–489.6)       | 126% (113.5 to 134.9%)   | 64.7 (46.6–86.2)    | 2.1% (-2.6 to 5.7%)      | 0.52      |
| Spinal cord lesion at neck level    | Incidence  | 37.7 (20.8–81.1)          | 55.3% (-12.6 to 145.9%)  | 6.6 (3.6–14.3)      | -13.3% (-54 to 45.7%)    | 0.77      |
|                                     | Prevalence | 1179.7 (578.7–2753.3)     | 98.8% (42.8 to 150.3%)   | 192.6 (95.9–445.7)  | 2.3% (-24.7 to 24.9%)    | 0.70      |
|                                     | YLDs       | 478.8 (220–1142.1)        | 85% (33.5 to 134.8%)     | 77.7 (36.2–184)     | -3.6% (-28.8 to 18.6%)   | 0.69      |
| Spinal cord lesion below neck level | Incidence  | 15.1 (11.5–19.6)          | -18.2% (-57.7 to 42.1%)  | 2.6 (2–3.4)         | -57.2% (-78.4 to -24.2%) | 0.76      |
|                                     | Prevalence | 418 (387–462.5)           | 148.2% (141 to 157.3%)   | 71.7 (66.4–79.4)    | 13% (9.8 to 17.6%)       | 0.72      |
|                                     | YLDs       | 85.4 (59.7–113.8)         | 88.1% (74.3 to 101.8%)   | 14.5 (10.2–19.3)    | -14.1% (-20.4 to -7.9%)  | 0.71      |
| Head Injuries                       | Incidence  | 1911.5 (1624.9–2305.2)    | 49% (31.3 to 67.4%)      | 318.6 (271.9–382.4) | -14.5% (-24.8 to -4%)    | 0.58      |
|                                     | Prevalence | 3096.9 (2843.7–3481.3)    | 127.5% (113.2 to 135.7%) | 552.2 (507.4–619.2) | 2.4% (-3.3 to 5.7%)      | 0.54      |
|                                     | YLDs       | 453 (331.6–604)           | 124.9% (111.3 to 133.7%) | 80.1 (58.6–106.9)   | 1.9% (-3.5 to 5.4%)      | 0.53      |
| Spinal Injuries                     | Incidence  | 52.8 (34.8–97.7)          | 23.6% (-24.7 to 91.9%)   | 9.2 (6–17)          | -32.7% (-60.7 to 8.9%)   | 0.76      |
|                                     | Prevalence | 1597.7 (989.3–3176.1)     | 109.7% (55.4 to 149.4%)  | 264.3 (165.5–520.5) | 5% (-19.4 to 21.4%)      | 0.71      |
|                                     | YLDs       | 564.2 (289.6–1229.1)      | 85.5% (36.6 to 124.6%)   | 92.2 (48–198.8)     | -5.4% (-27.6 to 12.3%)   | 0.70      |
| <b>Algeria</b>                      |            |                           |                          |                     |                          |           |
| Minor TBI                           | Incidence  | 51.3 (40.1–64.9)          | 37.6% (28.2 to 47.2%)    | 120.8 (94.6–153.1)  | -11.4% (-16.8 to -5.4%)  | 0.59      |
|                                     | Prevalence | 39.1 (35.5–43.7)          | 109% (95.9 to 129.5%)    | 98.1 (89.4–108.9)   | -6.4% (-11.4 to 1.7%)    | 0.61      |
|                                     | YLDs       | 4.7 (3.3–6.4)             | 109.1% (84.5 to 139.4%)  | 11.8 (8.3–15.9)     | -6.5% (-16.2 to 5.3%)    | 0.60      |
| Moderate/Severe TBI                 | Incidence  | 58.5 (51.6–65.7)          | 51.7% (41.7 to 61.1%)    | 145 (128.3–162.5)   | -14.5% (-18.5 to -10.3%) | 0.61      |
|                                     | Prevalence | 163.5 (154.5–173.9)       | 104.2% (97.1 to 112%)    | 404.8 (383.8–429.5) | -10.5% (-13.1 to -7.5%)  | 0.58      |
|                                     | YLDs       | 25.2 (17.9–33.9)          | 100.8% (89.2 to 114%)    | 62 (44.3–83.5)      | -11.3% (-15.9 to -6.3%)  | 0.57      |
| Spinal cord lesion at neck level    | Incidence  | 1 (0.8–1.4)               | 62.5% (49.5 to 77.2%)    | 2.5 (1.9–3.3)       | -7.4% (-15.1 to 0.6%)    | 0.69      |
|                                     | Prevalence | 40.7 (29.8–67.4)          | 221.5% (139.2 to 415.9%) | 95 (70.4–154.2)     | 45.6% (10.5 to 129.3%)   | 0.65      |
|                                     | YLDs       | 16.1 (10.1–27.4)          | 198.8% (111.7 to 382%)   | 37.4 (23.7–62.4)    | 36.3% (-1.6 to 118.3%)   | 0.64      |
| Spinal cord lesion below neck level | Incidence  | 0.9 (0.7–1.2)             | 62.4% (48 to 77.6%)      | 2.2 (1.7–2.9)       | -5.9% (-14 to 1.6%)      | 0.79      |
|                                     | Prevalence | 27 (25–29.5)              | 110.4% (99.9 to 120.6%)  | 65.3 (60.4–71.1)    | -4.3% (-8.6 to 0%)       | 0.76      |

**Table S14** Incidence, prevalence, and disability of head and spinal injuries in the world and in North Africa and Middle East countries

|                                     |            | All Ages            |                          | Age-standardised    |                          |           |
|-------------------------------------|------------|---------------------|--------------------------|---------------------|--------------------------|-----------|
|                                     |            | Number (thousand)   | Percent change           | Rate per 100,000    | Percent change           | Sex ratio |
| Location                            |            | 2019                | From 1990 to 2019        | 2019                | From 1990 to 2019        | 2019      |
| Cause                               | Measure    | Mean (95% UI)       | Mean (95% UI)            | Mean (95% UI)       | Mean (95% UI)            | F:M       |
| Head Injuries                       | YLDs       | 5.4 (3.7–7.3)       | 62.3% (38.7 to 89.2%)    | 13 (9–17.5)         | -25.5% (-35.4 to -14%)   | 0.75      |
|                                     | Incidence  | 109.8 (95.4–126.4)  | 44.8% (36.1 to 53.2%)    | 265.8 (231.2–305.6) | -13.1% (-17.2 to -8.7%)  | 0.60      |
|                                     | Prevalence | 202.6 (192.8–214.1) | 105.1% (98.8 to 112.3%)  | 502.8 (479.6–530.1) | -9.8% (-12 to -7%)       | 0.58      |
| Spinal Injuries                     | YLDs       | 29.9 (21.5–40.1)    | 102.1% (90.9 to 114.9%)  | 73.8 (52.9–99)      | -10.6% (-14.9 to -6%)    | 0.57      |
|                                     | Incidence  | 1.9 (1.6–2.4)       | 62.5% (50.5 to 74.2%)    | 4.8 (3.9–5.8)       | -6.7% (-13.1 to -0.4%)   | 0.74      |
|                                     | Prevalence | 67.8 (56.1–95.2)    | 165.6% (124.4 to 263.4%) | 160.3 (134–220.9)   | 20.1% (2.5 to 61.7%)     | 0.70      |
|                                     | YLDs       | 21.5 (14.2–32.9)    | 146.5% (91.6 to 263.6%)  | 50.5 (33.5–75.6)    | 12.2% (-11.6 to 62.6%)   | 0.66      |
| <b>Bahrain</b>                      |            |                     |                          |                     |                          |           |
| Minor TBI                           | Incidence  | 1.7 (1.3–2.1)       | 157.9% (138.2 to 177.1%) | 123 (96.6–156.2)    | 5.2% (-1.9 to 13%)       | 0.62      |
|                                     | Prevalence | 1.5 (1.4–1.6)       | 314.7% (294.7 to 336.8%) | 92.6 (85.6–100)     | 3.2% (-1.1 to 7.8%)      | 0.64      |
|                                     | YLDs       | 0.2 (0.1–0.3)       | 316.5% (261.9 to 381%)   | 11.1 (7.6–15.1)     | 3.4% (-7.8 to 14.9%)     | 0.63      |
| Moderate/Severe TBI                 | Incidence  | 1.9 (1.7–2.2)       | 177.1% (156.5 to 197.5%) | 136 (120–153.1)     | -5.5% (-10.2 to -0.5%)   | 0.58      |
|                                     | Prevalence | 6.8 (6.4–7.3)       | 331% (314.2 to 348%)     | 394.3 (372.7–419.7) | 4.5% (1.3 to 7.9%)       | 0.57      |
|                                     | YLDs       | 1.1 (0.7–1.4)       | 323.1% (290.3 to 359.8%) | 60.4 (42.7–82.4)    | 3.6% (-2.7 to 10.6%)     | 0.56      |
| Spinal cord lesion at neck level    | Incidence  | <0.1 (<0.1–<0.1)    | 201.5% (172.1 to 230.5%) | 2.5 (1.9–3.2)       | 4.2% (-6.1 to 14%)       | 0.70      |
|                                     | Prevalence | 1.3 (1.2–1.5)       | 337.8% (300.2 to 368.3%) | 72.1 (66–81.2)      | 14.4% (3.6 to 22.4%)     | 0.69      |
|                                     | YLDs       | 0.5 (0.4–0.7)       | 297.9% (232.5 to 381.3%) | 27.6 (19.3–35.9)    | 4.7% (-11 to 24.4%)      | 0.67      |
| Spinal cord lesion below neck level | Incidence  | <0.1 (<0.1–<0.1)    | 205.3% (175.9 to 235%)   | 2.2 (1.6–2.8)       | 7.3% (-2.8 to 16.1%)     | 0.80      |
|                                     | Prevalence | 1.1 (1.1–1.2)       | 361.3% (336.4 to 387.6%) | 65.2 (61–69.6)      | 18.3% (12.3 to 24.5%)    | 0.79      |
|                                     | YLDs       | 0.2 (0.1–0.3)       | 228% (170.4 to 302.9%)   | 11.7 (8.1–15.9)     | -15.1% (-28.3 to 0.3%)   | 0.77      |
| Head Injuries                       | Incidence  | 3.6 (3.1–4.2)       | 167.7% (150.1 to 185%)   | 259 (224.4–299.4)   | -0.7% (-5.5 to 4.4%)     | 0.60      |
|                                     | Prevalence | 8.3 (7.9–8.8)       | 328% (314.1 to 342.3%)   | 486.9 (464.6–512.4) | 4.2% (1.5 to 7.2%)       | 0.58      |
|                                     | YLDs       | 1.2 (0.9–1.7)       | 322.1% (292 to 355.1%)   | 71.4 (50.3–97)      | 3.6% (-2.3 to 9.8%)      | 0.57      |
| Spinal Injuries                     | Incidence  | 0.1 (0.1–0.1)       | 203.2% (178.6 to 227.1%) | 4.6 (3.8–5.6)       | 5.6% (-2.2 to 13.4%)     | 0.74      |
|                                     | Prevalence | 2.5 (2.3–2.7)       | 348.4% (320.5 to 373.3%) | 137.3 (127.8–148.6) | 16.2% (8.9 to 22.2%)     | 0.73      |
|                                     | YLDs       | 0.7 (0.5–0.9)       | 274.7% (224.5 to 332.1%) | 39.3 (27.9–51.1)    | -2.1% (-13.7 to 11.7%)   | 0.70      |
| <b>Egypt</b>                        |            |                     |                          |                     |                          |           |
| Minor TBI                           | Incidence  | 106.8 (83.6–134.5)  | 84.5% (71.7 to 99.2%)    | 103 (80.9–129.6)    | 7.3% (0.5 to 15.6%)      | 0.68      |
|                                     | Prevalence | 65.1 (60.2–70.7)    | 111.8% (102.8 to 121.1%) | 78.1 (72.6–84)      | 7% (3.1 to 11%)          | 0.71      |
|                                     | YLDs       | 7.9 (5.5–10.8)      | 112.3% (86.8 to 142%)    | 9.4 (6.5–12.8)      | 7.1% (-4.7 to 20.2%)     | 0.69      |
| Moderate/Severe TBI                 | Incidence  | 115.7 (101.6–130.6) | 86.7% (75.9 to 97.2%)    | 126.7 (111.2–143.2) | 3.7% (-1.1 to 8.8%)      | 0.67      |
|                                     | Prevalence | 272.5 (258.4–287.4) | 108.1% (101.6 to 115.2%) | 318.5 (302.7–334.8) | 3.6% (0.5 to 6.8%)       | 0.63      |
|                                     | YLDs       | 42.5 (29.7–57.7)    | 107.1% (92.8 to 124%)    | 49.2 (34.5–66.6)    | 3.4% (-3.2 to 10.6%)     | 0.62      |
| Spinal cord lesion at neck level    | Incidence  | 2.3 (1.7–3.2)       | 126.4% (96.4 to 189.9%)  | 2.5 (1.8–3.4)       | 23.4% (8.1 to 56.2%)     | 0.75      |
|                                     | Prevalence | 47.9 (43.4–55)      | 138% (119.3 to 172.1%)   | 51.4 (47–58.3)      | 19.3% (10.8 to 34.9%)    | 0.75      |
|                                     | YLDs       | 19.4 (13.7–25.6)    | 121.4% (81.7 to 175.7%)  | 20.7 (14.7–27.2)    | 11.4% (-7.7 to 35.6%)    | 0.73      |
| Spinal cord lesion below neck level | Incidence  | 1.7 (1.3–2.3)       | 93.4% (80.5 to 107.4%)   | 1.8 (1.4–2.5)       | 7.8% (1.2 to 15.1%)      | 0.92      |
|                                     | Prevalence | 43.9 (41–46.7)      | 116.5% (106.6 to 127.8%) | 48.7 (45.6–51.7)    | 8.5% (3.9 to 13.8%)      | 0.87      |
|                                     | YLDs       | 9.6 (6.5–12.7)      | 68.2% (39.8 to 99.9%)    | 10.5 (7.2–13.9)     | -15.4% (-29.6 to -0.5%)  | 0.85      |
| Head Injuries                       | Incidence  | 222.5 (191.8–257.4) | 85.6% (74.8 to 96.2%)    | 229.8 (199.1–263.8) | 5.3% (0.5 to 10.6%)      | 0.68      |
|                                     | Prevalence | 337.6 (322.2–354.1) | 108.8% (103.3 to 115.1%) | 396.6 (378.8–415.3) | 4.3% (1.7 to 7%)         | 0.64      |
|                                     | YLDs       | 50.3 (35.4–68.5)    | 107.9% (95 to 122.9%)    | 58.6 (41.4–79.3)    | 4% (-2.1 to 10.7%)       | 0.63      |
| Spinal Injuries                     | Incidence  | 4.1 (3.3–5.1)       | 111.1% (92 to 145.7%)    | 4.3 (3.5–5.4)       | 16.3% (6.6 to 33.8%)     | 0.82      |
|                                     | Prevalence | 91.7 (85.3–100.3)   | 127.2% (115.4 to 145%)   | 100.1 (93.4–108.4)  | 13.8% (8.4 to 21.8%)     | 0.81      |
|                                     | YLDs       | 29 (20.5–37.5)      | 100.5% (75.2 to 133.9%)  | 31.2 (22.2–40.3)    | 0.7% (-11.7 to 16.9%)    | 0.77      |
| <b>Iran</b>                         |            |                     |                          |                     |                          |           |
| Minor TBI                           | Incidence  | 102.3 (79.9–131.1)  | -36.8% (-57.3 to -16.9%) | 120.7 (94.2–154.7)  | -54.9% (-70 to -40.3%)   | 0.53      |
|                                     | Prevalence | 92.7 (81.9–110.1)   | 32.7% (11.3 to 53.3%)    | 108.5 (96.2–128.2)  | -38.8% (-52.4 to -27.4%) | 0.53      |
|                                     | YLDs       | 11.1 (8.1–14.9)     | 33.6% (11.9 to 54.5%)    | 12.9 (9.5–17.3)     | -37.8% (-52.2 to -27%)   | 0.52      |
| Moderate/Severe TBI                 | Incidence  | 122.4 (107.7–139.5) | -61.6% (-73.6 to -43.4%) | 146.8 (129.6–166.5) | -74% (-81.9 to -62.1%)   | 0.54      |



**Table S14** Incidence, prevalence, and disability of head and spinal injuries in the world and in North Africa and Middle East countries

|                                     |            | All Ages            |                          | Age-standardised     |                          |           |
|-------------------------------------|------------|---------------------|--------------------------|----------------------|--------------------------|-----------|
|                                     |            | Number (thousand)   | Percent change           | Rate per 100,000     | Percent change           | Sex ratio |
| Location                            |            | 2019                | From 1990 to 2019        | 2019                 | From 1990 to 2019        | 2019      |
| Cause                               | Measure    | Mean (95% UI)       | Mean (95% UI)            | Mean (95% UI)        | Mean (95% UI)            | F:M       |
| Spinal cord lesion at neck level    | Prevalence | 386.2 (357.7–420.7) | 64.8% (50.3 to 75.3%)    | 441.4 (410.4–478.8)  | -23.9% (-31.9 to -18.9%) | 0.52      |
|                                     | YLDs       | 59.1 (43.8–78.8)    | 56.3% (42.3 to 68.7%)    | 67.2 (49.8–89.3)     | -25.9% (-33.4 to -20.8%) | 0.51      |
|                                     | Incidence  | 2.2 (1.7–2.9)       | -82% (-91.4 to -59.8%)   | 2.7 (2–3.5)          | -89.4% (-95.1 to -75.6%) | 0.61      |
| Spinal cord lesion below neck level | Prevalence | 118.8 (77.9–213.1)  | 1.3% (-24.5 to 52.5%)    | 127 (85.4–222.2)     | -48.8% (-63.2 to -23.7%) | 0.62      |
|                                     | YLDs       | 45.4 (26.1–81.3)    | -8.2% (-31.9 to 36.5%)   | 48.3 (28.1–84.5)     | -52.4% (-65.6 to -29.9%) | 0.61      |
|                                     | Incidence  | 1.9 (1.5–2.5)       | -84.4% (-93.2 to -59.6%) | 2.3 (1.7–3)          | -91% (-96.2 to -76.1%)   | 0.70      |
| Head Injuries                       | Prevalence | 73.6 (61.6–95.4)    | 103.6% (93 to 116.7%)    | 82.1 (69.1–105.7)    | -2.8% (-8.2 to 4.5%)     | 0.70      |
|                                     | YLDs       | 13.5 (8.9–19.3)     | 48.5% (35.7 to 60.3%)    | 15 (10–21.4)         | -28% (-34.3 to -22%)     | 0.69      |
|                                     | Incidence  | 224.8 (194.6–259.6) | -53.3% (-64.7 to -38.8%) | 267.5 (232.3–308.7)  | -67.8% (-75.7 to -58%)   | 0.54      |
| Spinal Injuries                     | Prevalence | 478.9 (445.7–520.7) | 57.4% (45.6 to 67.5%)    | 549.8 (513.4–594.8)  | -27.4% (-34.4 to -22.2%) | 0.52      |
|                                     | YLDs       | 70.2 (52.3–93.2)    | 52.2% (39.8 to 63.9%)    | 80.1 (59.6–106.4)    | -28.1% (-34.8 to -23.2%) | 0.51      |
|                                     | Incidence  | 4.2 (3.4–5.1)       | -83.2% (-90.8 to -68.2%) | 5 (4.1–6.1)          | -90.2% (-94.8 to -81.2%) | 0.65      |
|                                     | Prevalence | 192.4 (147.6–289.6) | 25.4% (-10.6 to 72.8%)   | 209.1 (162.9–308.2)  | -37.1% (-55.4 to -15%)   | 0.65      |
|                                     | YLDs       | 58.9 (36.9–97.2)    | 0.7% (-26.5 to 40%)      | 63.3 (39.9–102)      | -48.3% (-62.5 to -29.6%) | 0.63      |
| <b>Iraq</b>                         |            |                     |                          |                      |                          |           |
| Minor TBI                           | Incidence  | 79.7 (61.6–103)     | 85.4% (54.6 to 111.5%)   | 172.9 (133.1–222.5)  | -24.1% (-36.2 to -14.2%) | 0.51      |
|                                     | Prevalence | 83.8 (53.4–142.1)   | 112.7% (87.2 to 139.6%)  | 241.5 (154.3–413.9)  | -28.4% (-41.1 to -15.2%) | 0.52      |
|                                     | YLDs       | 10.1 (6.1–16.5)     | 115.5% (87.6 to 148.7%)  | 28.7 (17.4–47.3)     | -26.7% (-39.5 to -12.7%) | 0.52      |
| Moderate/Severe TBI                 | Incidence  | 60.6 (53.8–68.2)    | 128.5% (110.5 to 141.9%) | 148 (131.9–165.3)    | -11.7% (-17.4 to -7.3%)  | 0.51      |
|                                     | Prevalence | 177.4 (144–255.7)   | 144.3% (114 to 171.3%)   | 508.7 (417.6–728.7)  | -18.1% (-30 to -8.2%)    | 0.47      |
|                                     | YLDs       | 27.2 (18.8–38.5)    | 145.2% (113.8 to 174.8%) | 77.1 (53.4–107.8)    | -17.1% (-29 to -6.5%)    | 0.46      |
| Spinal cord lesion at neck level    | Incidence  | 2.1 (1.2–3.9)       | 41.9% (13.7 to 91.4%)    | 4.8 (2.9–8.9)        | -41.2% (-52.2 to -22.7%) | 0.58      |
|                                     | Prevalence | 251 (76–710.9)      | 88.9% (77.5 to 110.4%)   | 626.6 (193.4–1771.8) | -25.1% (-34.9 to -14%)   | 0.67      |
|                                     | YLDs       | 101.2 (30.5–290.1)  | 76.1% (63.5 to 99.5%)    | 250.3 (76.5–713.1)   | -29% (-37.7 to -18%)     | 0.66      |
| Spinal cord lesion below neck level | Incidence  | 1 (0.8–1.3)         | 147.2% (134.3 to 161.8%) | 2.4 (1.9–3.1)        | -4.5% (-9.2 to 0.5%)     | 0.66      |
|                                     | Prevalence | 24.7 (23.2–26.3)    | 192.8% (182.8 to 204.7%) | 67.9 (64.2–72.2)     | -0.6% (-3.8 to 3.1%)     | 0.68      |
|                                     | YLDs       | 5.3 (3.6–7.1)       | 132.5% (98.8 to 172.3%)  | 14.3 (9.9–19.3)      | -20.7% (-31.5 to -8.4%)  | 0.67      |
| Head Injuries                       | Incidence  | 140.3 (119.4–166.1) | 101.8% (77.4 to 121.4%)  | 320.9 (275.6–375.8)  | -18.8% (-27.5 to -12.2%) | 0.51      |
|                                     | Prevalence | 261.2 (207.4–347.3) | 133.2% (110 to 156.2%)   | 750.1 (597.1–996.4)  | -21.7% (-31.2 to -12.7%) | 0.49      |
|                                     | YLDs       | 37.3 (26.8–50.9)    | 136.4% (111.1 to 161.5%) | 105.8 (76.4–143.3)   | -19.9% (-30.1 to -10.6%) | 0.48      |
| Spinal Injuries                     | Incidence  | 3.1 (2.2–4.9)       | 65.2% (31.9 to 112.4%)   | 7.2 (5.2–11.3)       | -32.4% (-44.7 to -15.8%) | 0.61      |
|                                     | Prevalence | 275.6 (100.5–735)   | 95.1% (81.3 to 125.1%)   | 694.5 (261.2–1838.6) | -23.3% (-32.7 to -11.6%) | 0.68      |
|                                     | YLDs       | 106.4 (35–295.5)    | 78.2% (65.8 to 104.2%)   | 264.6 (89.6–729.2)   | -28.6% (-37.1 to -18.4%) | 0.66      |
| <b>Jordan</b>                       |            |                     |                          |                      |                          |           |
| Minor TBI                           | Incidence  | 13.4 (10.4–17.1)    | 184.5% (166.8 to 203.9%) | 107 (83.2–136.3)     | -3.2% (-8.6 to 2.9%)     | 0.62      |
|                                     | Prevalence | 7.8 (7.1–8.5)       | 281.6% (265.9 to 299.7%) | 78.7 (72.7–85.4)     | -2.9% (-6.2 to 1%)       | 0.64      |
|                                     | YLDs       | 0.9 (0.6–1.3)       | 282.4% (236.3 to 331.8%) | 9.5 (6.5–13)         | -2.8% (-12.4 to 7.4%)    | 0.63      |
| Moderate/Severe TBI                 | Incidence  | 12.7 (11.2–14.3)    | 197.7% (181.1 to 214.4%) | 115.9 (102.9–129.2)  | -8.3% (-12.5 to -3.8%)   | 0.59      |
|                                     | Prevalence | 31.6 (29.9–33.5)    | 290.5% (279 to 302.4%)   | 324.1 (306.9–341.8)  | -3.8% (-6.2 to -1.3%)    | 0.58      |
|                                     | YLDs       | 4.9 (3.5–6.8)       | 285.5% (258.6 to 315.4%) | 49.9 (34.8–67.9)     | -4.2% (-9.4 to 1.7%)     | 0.57      |
| Spinal cord lesion at neck level    | Incidence  | 0.2 (0.2–0.3)       | 220.9% (198.2 to 245.4%) | 2.2 (1.7–2.8)        | -1.1% (-8 to 6.1%)       | 0.70      |
|                                     | Prevalence | 6.6 (5.9–7.8)       | 359.7% (320.8 to 442.6%) | 61.8 (56.2–71.9)     | 17.5% (8.7 to 35.2%)     | 0.70      |
|                                     | YLDs       | 2.6 (1.8–3.5)       | 323.5% (249.5 to 427.2%) | 24 (16.7–31.6)       | 8.9% (-8 to 31.2%)       | 0.68      |
| Spinal cord lesion below neck level | Incidence  | 0.2 (0.2–0.3)       | 216.7% (193.8 to 239.8%) | 1.9 (1.5–2.4)        | -1.1% (-8.1 to 5.3%)     | 0.79      |
|                                     | Prevalence | 5.8 (5.4–6.2)       | 310% (294 to 330.6%)     | 55.8 (52.5–59.4)     | 4.4% (0.6 to 9%)         | 0.79      |
|                                     | YLDs       | 1.1 (0.7–1.5)       | 200.7% (150.9 to 256.9%) | 10.4 (7.1–14.2)      | -22.8% (-33.6 to -10.5%) | 0.77      |
| Head Injuries                       | Incidence  | 26 (22.3–30.5)      | 190.8% (175.3 to 206.3%) | 223 (193.7–258.6)    | -5.9% (-10 to -1.2%)     | 0.60      |
|                                     | Prevalence | 39.4 (37.5–41.4)    | 288.7% (279.4 to 299.1%) | 402.8 (385.5–421.6)  | -3.6% (-5.7 to -1.6%)    | 0.59      |
|                                     | YLDs       | 5.9 (4.1–8)         | 285% (261.2 to 310.9%)   | 59.4 (41.4–80.3)     | -3.9% (-8.6 to 1%)       | 0.58      |
| Spinal Injuries                     | Incidence  | 0.5 (0.4–0.5)       | 218.9% (200.2 to 239.5%) | 4.1 (3.4–4.9)        | -1.1% (-6.7 to 4.5%)     | 0.74      |

**Table S14** Incidence, prevalence, and disability of head and spinal injuries in the world and in North Africa and Middle East countries

| Location<br>Cause                   |            | All Ages              |                                    | Age-standardised      |                                    | Sex ratio<br>2019<br>F:M |
|-------------------------------------|------------|-----------------------|------------------------------------|-----------------------|------------------------------------|--------------------------|
|                                     |            | Number (thousand)     | Percent change                     | Rate per 100,000      | Percent change                     |                          |
|                                     |            | 2019<br>Mean (95% UI) | From 1990 to 2019<br>Mean (95% UI) | 2019<br>Mean (95% UI) | From 1990 to 2019<br>Mean (95% UI) |                          |
|                                     | Prevalence | 12.4 (11.4–13.7)      | 335.1% (312.7 to 373.3%)           | 117.6 (109.5–128.8)   | 10.9% (5.8 to 19.5%)               | 0.74                     |
|                                     | YLDs       | 3.7 (2.6–4.8)         | 277.9% (228 to 346.7%)             | 34.4 (24.2–44.8)      | -3.2% (-14.6 to 11.5%)             | 0.71                     |
| <b>Kuwait</b>                       |            |                       |                                    |                       |                                    |                          |
| Minor TBI                           | Incidence  | 6 (4.6–7.7)           | -31% (-67.8 to 33.6%)              | 132.2 (102.6–168.1)   | -69.6% (-85.6 to -42.1%)           | 0.54                     |
|                                     | Prevalence | 4.8 (4.3–5.4)         | 129.6% (66.3 to 182.4%)            | 106.5 (96.7–119.3)    | -21.6% (-38.9 to -9.6%)            | 0.55                     |
|                                     | YLDs       | 0.6 (0.4–0.8)         | 135% (70.4 to 199.6%)              | 12.8 (9–17.3)         | -20.7% (-37.8 to -5.4%)            | 0.55                     |
| Moderate/Severe TBI                 | Incidence  | 6.5 (5.7–7.3)         | 59% (7.2 to 106.8%)                | 147.9 (130.9–164.5)   | -36.9% (-56.1 to -20.4%)           | 0.48                     |
|                                     | Prevalence | 20.2 (18.9–21.6)      | 199.7% (189.1 to 210.7%)           | 443.3 (419.6–473.3)   | -8.8% (-11.4 to -6.3%)             | 0.49                     |
|                                     | YLDs       | 3.1 (2.2–4.2)         | 192.9% (172.4 to 214.4%)           | 67.8 (48.4–91.6)      | -10.2% (-15.3 to -5%)              | 0.49                     |
| Spinal cord lesion at neck level    | Incidence  | 0.1 (0.1–0.2)         | -82.1% (-93.6 to -37.9%)           | 2.7 (2–3.4)           | -92.1% (-97.3 to -73.4%)           | 0.59                     |
|                                     | Prevalence | 5.5 (4–9.3)           | 280.2% (233.8 to 345.5%)           | 107.9 (80.3–176.4)    | 21.5% (6.5 to 45.7%)               | 0.67                     |
|                                     | YLDs       | 2.1 (1.3–3.6)         | 248.5% (188.7 to 319.3%)           | 40.3 (25.6–66.9)      | 12.3% (-5.5 to 32.7%)              | 0.66                     |
| Spinal cord lesion below neck level | Incidence  | 0.1 (0.1–0.1)         | 151.7% (132 to 171.8%)             | 2.3 (1.8–3)           | -2.7% (-9.8 to 3.7%)               | 0.68                     |
|                                     | Prevalence | 3.4 (3.2–3.7)         | 225.2% (212.3 to 239.7%)           | 70.8 (66.4–75.4)      | 1.3% (-2.5 to 5.3%)                | 0.72                     |
|                                     | YLDs       | 0.6 (0.4–0.8)         | 168.6% (124.8 to 218.6%)           | 11.7 (8.1–16.2)       | -15.8% (-27.5 to -2.6%)            | 0.71                     |
| Head Injuries                       | Incidence  | 12.5 (10.8–14.6)      | -2.2% (-45.2 to 51.3%)             | 280.1 (242.7–323.8)   | -58.2% (-76 to -37.2%)             | 0.51                     |
|                                     | Prevalence | 24.9 (23.7–26.5)      | 183.2% (157.4 to 200%)             | 549.8 (523.6–578.6)   | -11.6% (-17.4 to -7.7%)            | 0.50                     |
|                                     | YLDs       | 3.7 (2.6–5)           | 182% (157.4 to 204.3%)             | 80.6 (57.8–108.6)     | -12% (-18 to -6.7%)                | 0.50                     |
| Spinal Injuries                     | Incidence  | 0.2 (0.2–0.3)         | -68.3% (-87.9 to -5.2%)            | 5 (4.1–6)             | -86.3% (-94.9 to -60.5%)           | 0.63                     |
|                                     | Prevalence | 8.9 (7.3–12.7)        | 257.1% (228.7 to 305%)             | 178.7 (149.6–246.3)   | 12.6% (3.7 to 28.4%)               | 0.69                     |
|                                     | YLDs       | 2.7 (1.7–4.2)         | 227.6% (179.1 to 283.8%)           | 52 (34.5–79.6)        | 4.4% (-10.2 to 21%)                | 0.67                     |
| <b>Lebanon</b>                      |            |                       |                                    |                       |                                    |                          |
| Minor TBI                           | Incidence  | 6.2 (4.9–8)           | -28.5% (-59.5 to 8.4%)             | 121.8 (94.8–155.1)    | -51.8% (-72.3 to -28.3%)           | 0.58                     |
|                                     | Prevalence | 7.3 (5.2–12.2)        | 11.6% (-8.8 to 42.1%)              | 138.3 (97.8–231.3)    | -40.5% (-51.5 to -25%)             | 0.58                     |
|                                     | YLDs       | 0.9 (0.6–1.4)         | 10.6% (-10.9 to 43.9%)             | 16.4 (10.5–27.1)      | -40.7% (-52.2 to -24.1%)           | 0.58                     |
| Moderate/Severe TBI                 | Incidence  | 6.5 (5.8–7.3)         | 28% (2 to 48.4%)                   | 126.1 (111.8–141.2)   | -24% (-38.7 to -12.5%)             | 0.59                     |
|                                     | Prevalence | 20.7 (18.1–27.1)      | 41.4% (10.6 to 67.1%)              | 389.8 (339.9–510.3)   | -26.8% (-41.5 to -14.8%)           | 0.53                     |
|                                     | YLDs       | 3.2 (2.2–4.4)         | 40.3% (8.9 to 67%)                 | 59.3 (42.2–82.9)      | -26.9% (-41.4 to -14.3%)           | 0.52                     |
| Spinal cord lesion at neck level    | Incidence  | 0.1 (0.1–0.2)         | -72.6% (-89.2 to -22.9%)           | 2.5 (1.9–3.2)         | -82.3% (-93 to -51.3%)             | 0.71                     |
|                                     | Prevalence | 18.1 (5.5–58.1)       | -21.4% (-30.5 to 12.7%)            | 338.9 (102.6–1087)    | -54.1% (-60 to -36.4%)             | 0.77                     |
|                                     | YLDs       | 6.7 (1.9–20)          | -30.7% (-39.1 to 0.8%)             | 124.9 (35.6–375.8)    | -59.3% (-64.8 to -42.7%)           | 0.76                     |
| Spinal cord lesion below neck level | Incidence  | 0.1 (0.1–0.1)         | 59.3% (34.4 to 87.4%)              | 2.2 (1.7–2.8)         | -4.9% (-20.5 to 11.3%)             | 0.79                     |
|                                     | Prevalence | 3.3 (3.1–3.5)         | 79.9% (69.7 to 89.7%)              | 61.4 (57.6–65.5)      | -6.9% (-12.3 to -1.8%)             | 0.78                     |
|                                     | YLDs       | 0.5 (0.4–0.7)         | 24.1% (4 to 45.4%)                 | 10.2 (6.9–13.8)       | -35.4% (-45.4 to -24.5%)           | 0.76                     |
| Head Injuries                       | Incidence  | 12.8 (11.1–14.8)      | -7.7% (-38.2 to 21.4%)             | 247.9 (215.1–288.1)   | -40.8% (-59.4 to -23.5%)           | 0.59                     |
|                                     | Prevalence | 28 (23.8–37.1)        | 32.2% (7.4 to 57.3%)               | 528.1 (446.9–699.7)   | -30.9% (-42.9 to -19.1%)           | 0.54                     |
|                                     | YLDs       | 4 (2.8–5.6)           | 32.7% (7 to 58.8%)                 | 75.7 (53.6–105.1)     | -30.4% (-42.8 to -18%)             | 0.54                     |
| Spinal Injuries                     | Incidence  | 0.2 (0.2–0.3)         | -55.5% (-81.3 to 1.8%)             | 4.7 (3.9–5.7)         | -71.5% (-87.7 to -37.5%)           | 0.75                     |
|                                     | Prevalence | 21.4 (8.8–61.4)       | -14% (-27 to 31.1%)                | 400.3 (164.1–1148.2)  | -50.2% (-57.6 to -27.9%)           | 0.77                     |
|                                     | YLDs       | 7.2 (2.4–20.6)        | -28.3% (-37.9 to 4.3%)             | 135 (45.1–386.4)      | -58.1% (-63.8 to -41.5%)           | 0.76                     |
| <b>Libya</b>                        |            |                       |                                    |                       |                                    |                          |
| Minor TBI                           | Incidence  | 14.2 (10.4–21.1)      | 143.2% (88.7 to 262.8%)            | 203.8 (147.6–306.1)   | 55.9% (19.3 to 138.8%)             | 0.52                     |
|                                     | Prevalence | 9.6 (7.9–13)          | 202.8% (167 to 257%)               | 141.4 (116.4–187.5)   | 30.8% (14.8 to 56.5%)              | 0.53                     |
|                                     | YLDs       | 1.2 (0.8–1.6)         | 201% (154.1 to 259.1%)             | 16.9 (11.8–23.5)      | 29.7% (10 to 56.5%)                | 0.52                     |
| Moderate/Severe TBI                 | Incidence  | 12.5 (11–14.7)        | 108.8% (90.7 to 134.3%)            | 180.8 (159–210.7)     | 10.2% (1.7 to 23.9%)               | 0.52                     |
|                                     | Prevalence | 33.5 (30.9–37.6)      | 166.2% (154.2 to 184.5%)           | 485.9 (450.3–543)     | 7% (2.4 to 15.1%)                  | 0.50                     |
|                                     | YLDs       | 5.2 (3.7–6.9)         | 162.4% (143.6 to 185.4%)           | 74.2 (52.8–99.5)      | 6.3% (-0.6 to 15.8%)               | 0.49                     |
| Spinal cord lesion at neck level    | Incidence  | 0.6 (0.3–1.5)         | 542.7% (203.5 to 1469.4%)          | 9.4 (4.5–22)          | 251.6% (64.1 to 771.8%)            | 0.57                     |
|                                     | Prevalence | 15.7 (7.7–36.4)       | 317.9% (229.1 to 390.4%)           | 213.7 (105.7–498.9)   | 103.4% (44.1 to 161.2%)            | 0.58                     |
|                                     | YLDs       | 6.3 (2.9–14.6)        | 291.7% (199.9 to 372%)             | 85.2 (39.5–199.7)     | 92.9% (34.9 to 150.8%)             | 0.57                     |

**Table S14** Incidence, prevalence, and disability of head and spinal injuries in the world and in North Africa and Middle East countries

| Location<br>Cause                   |            | All Ages              |                                    | Age-standardised      |                                    | Sex ratio<br>2019<br>F:M |
|-------------------------------------|------------|-----------------------|------------------------------------|-----------------------|------------------------------------|--------------------------|
|                                     |            | Number (thousand)     | Percent change                     | Rate per 100,000      | Percent change                     |                          |
|                                     |            | 2019<br>Mean (95% UI) | From 1990 to 2019<br>Mean (95% UI) | 2019<br>Mean (95% UI) | From 1990 to 2019<br>Mean (95% UI) |                          |
| Spinal cord lesion below neck level | Incidence  | 0.2 (0.1–0.2)         | 105.8% (85.6 to 136.4%)            | 2.6 (1.9–3.4)         | 13% (2.7 to 28.1%)                 | 0.67                     |
|                                     | Prevalence | 5.2 (4.9–5.8)         | 181.7% (164.7 to 207.5%)           | 73.3 (68.3–80.3)      | 16.8% (10.2 to 26.3%)              | 0.65                     |
|                                     | YLDs       | 1.1 (0.7–1.4)         | 130.5% (94.9 to 169.6%)            | 14.9 (10.5–19.7)      | -3.6% (-16.7 to 11.2%)             | 0.64                     |
| Head Injuries                       | Incidence  | 26.8 (22.3–34.2)      | 125.8% (95.7 to 182%)              | 384.6 (320.5–493.9)   | 30.4% (12.6 to 66%)                | 0.52                     |
|                                     | Prevalence | 43.1 (39.6–47.9)      | 173.6% (159.7 to 191.3%)           | 627.3 (578.7–693.6)   | 11.6% (5.9 to 19.3%)               | 0.51                     |
|                                     | YLDs       | 6.3 (4.6–8.5)         | 168.7% (151.7 to 189.7%)           | 91.1 (66.4–122.5)     | 9.9% (3.2 to 18.6%)                | 0.50                     |
| Spinal Injuries                     | Incidence  | 0.8 (0.5–1.6)         | 338.9% (157.3 to 790%)             | 11.9 (6.8–24.4)       | 141.6% (40.5 to 405.8%)            | 0.59                     |
|                                     | Prevalence | 21 (12.9–41.6)        | 272.9% (206.2 to 346.6%)           | 287 (176.8–572.8)     | 71% (31.2 to 126.2%)               | 0.60                     |
|                                     | YLDs       | 7.4 (3.8–15.7)        | 255.6% (178.8 to 331.9%)           | 100.1 (52–214.7)      | 67.9% (21.6 to 123.9%)             | 0.58                     |
| <b>Morocco</b>                      |            |                       |                                    |                       |                                    |                          |
| Minor TBI                           | Incidence  | 47.9 (37.3–61.4)      | 33.2% (24.6 to 42.7%)              | 131.1 (102–167.6)     | 0.2% (-5.8 to 6.7%)                | 0.60                     |
|                                     | Prevalence | 34.6 (32.1–37.6)      | 80.3% (73.5 to 87.9%)              | 98.8 (91.7–107.1)     | 0.3% (-2.9 to 3.8%)                | 0.61                     |
|                                     | YLDs       | 4.2 (2.9–5.7)         | 79.8% (60.4 to 99.3%)              | 11.9 (8.2–16.2)       | 0% (-9.2 to 9.5%)                  | 0.60                     |
| Moderate/Severe TBI                 | Incidence  | 54.3 (48–60.8)        | 55% (47 to 63.1%)                  | 154.8 (136.6–173.5)   | 3% (-1.3 to 7.1%)                  | 0.59                     |
|                                     | Prevalence | 144.8 (136.9–153.5)   | 93.4% (86.3 to 99.3%)              | 404.5 (383.4–427.9)   | 3.5% (0.3 to 6.2%)                 | 0.55                     |
|                                     | YLDs       | 22.3 (15.8–30.2)      | 90.8% (79.1 to 102.5%)             | 62.1 (43.8–84.1)      | 3% (-2.8 to 8.8%)                  | 0.54                     |
| Spinal cord lesion at neck level    | Incidence  | 1 (0.7–1.3)           | 61.2% (51 to 72.8%)                | 2.8 (2.1–3.6)         | 8% (1.4 to 14.9%)                  | 0.77                     |
|                                     | Prevalence | 25.3 (23.1–28.9)      | 69% (34.9 to 92.6%)                | 68.3 (62.4–77.6)      | -0.4% (-16.5 to 10.4%)             | 0.73                     |
|                                     | YLDs       | 10.3 (7.4–13.4)       | 55.9% (19.7 to 92.1%)              | 27.7 (19.8–35.9)      | -7.4% (-25.3 to 10.4%)             | 0.71                     |
| Spinal cord lesion below neck level | Incidence  | 0.9 (0.7–1.1)         | 59.1% (48.6 to 71.5%)              | 2.4 (1.8–3.2)         | 8% (1.6 to 14.8%)                  | 0.88                     |
|                                     | Prevalence | 23.8 (22.4–25.6)      | 96.9% (88.7 to 107%)               | 65.1 (61–69.8)        | 9.2% (5.1 to 14.4%)                | 0.82                     |
|                                     | YLDs       | 5.5 (3.9–7.3)         | 57.3% (33.8 to 81.8%)              | 15 (10.6–19.9)        | -12.1% (-24.2 to 0.7%)             | 0.80                     |
| Head Injuries                       | Incidence  | 102.2 (88.9–118.8)    | 44% (37 to 51.2%)                  | 285.9 (249.6–331.2)   | 1.7% (-2.5 to 5.9%)                | 0.60                     |
|                                     | Prevalence | 179.5 (171.4–188.3)   | 90.7% (85 to 95.5%)                | 503.3 (481.4–527.5)   | 2.9% (0.2 to 5%)                   | 0.56                     |
|                                     | YLDs       | 26.5 (18.7–35.9)      | 89% (78.7 to 99.1%)                | 73.9 (52–100.1)       | 2.5% (-2.9 to 7.6%)                | 0.55                     |
| Spinal Injuries                     | Incidence  | 1.8 (1.5–2.2)         | 60.2% (51.6 to 69.8%)              | 5.2 (4.3–6.3)         | 8% (2.9 to 13.7%)                  | 0.82                     |
|                                     | Prevalence | 49.1 (45.7–53.6)      | 81.5% (56.8 to 96.1%)              | 133.4 (124.2–145.2)   | 4.1% (-6.6 to 10.5%)               | 0.77                     |
|                                     | YLDs       | 15.8 (11.4–20.4)      | 56.4% (29.9 to 80.1%)              | 42.7 (30.9–55)        | -9.1% (-21.4 to 2.7%)              | 0.74                     |
| <b>Palestine</b>                    |            |                       |                                    |                       |                                    |                          |
| Minor TBI                           | Incidence  | 7 (5.4–8.7)           | 26.3% (-27.5 to 91.7%)             | 127.9 (100.2–160.9)   | -44.7% (-67.6 to -18.1%)           | 0.58                     |
|                                     | Prevalence | 8.3 (5.1–14.7)        | 201.7% (174.9 to 237.3%)           | 214.1 (131.3–372.1)   | 20.5% (9 to 34.4%)                 | 0.53                     |
|                                     | YLDs       | 1 (0.6–1.7)           | 203.2% (163.2 to 253.3%)           | 25.4 (15.1–42.3)      | 20.4% (4.8 to 39.1%)               | 0.53                     |
| Moderate/Severe TBI                 | Incidence  | 5.7 (5–6.4)           | 113.9% (63.7 to 151.3%)            | 126.6 (112.6–141.1)   | -10.4% (-29 to 3.1%)               | 0.58                     |
|                                     | Prevalence | 17.9 (13.9–27.3)      | 187.1% (161.2 to 203.5%)           | 474.3 (371.7–721.2)   | 8.1% (0 to 12.7%)                  | 0.47                     |
|                                     | YLDs       | 2.7 (1.8–4)           | 183.8% (156.8 to 209.1%)           | 71.5 (48.5–103.9)     | 6.9% (-1.5 to 13.9%)               | 0.47                     |
| Spinal cord lesion at neck level    | Incidence  | 0.1 (0.1–0.2)         | -53.6% (-75.6 to 17.5%)            | 3.1 (2.3–4.5)         | -78.2% (-88.7 to -46.3%)           | 0.65                     |
|                                     | Prevalence | 31.9 (9.4–90.5)       | 169.9% (145.5 to 183.3%)           | 742.4 (223.5–2100.8)  | 19.5% (6.1 to 26.6%)               | 0.64                     |
|                                     | YLDs       | 12.7 (3.7–36.5)       | 152.4% (126.9 to 173.8%)           | 294.1 (86.7–825.7)    | 12% (-1.2 to 20.9%)                | 0.64                     |
| Spinal cord lesion below neck level | Incidence  | 0.1 (0.1–0.1)         | 182.1% (162.2 to 208.6%)           | 2.3 (1.8–2.9)         | 15.4% (8 to 25.7%)                 | 0.75                     |
|                                     | Prevalence | 2.8 (2.4–3.5)         | 128.4% (60.1 to 198.9%)            | 71.4 (60.7–96.1)      | -10.4% (-30.8 to 8%)               | 0.68                     |
|                                     | YLDs       | 0.6 (0.4–0.9)         | 90.4% (28.8 to 168.5%)             | 14.9 (9.9–22.4)       | -25.6% (-44.5 to -2.5%)            | 0.67                     |
| Head Injuries                       | Incidence  | 12.6 (10.9–14.7)      | 54.8% (1.8 to 106.4%)              | 254.5 (221–295.7)     | -31.7% (-53.3 to -12.3%)           | 0.58                     |
|                                     | Prevalence | 26.2 (19.9–36.2)      | 191.6% (168.6 to 209.5%)           | 688.4 (527.1–948.2)   | 11.7% (4.9 to 17.8%)               | 0.49                     |
|                                     | YLDs       | 3.7 (2.6–5.1)         | 188.7% (163.9 to 212.4%)           | 97 (69.2–133.3)       | 10.2% (2.1 to 17.8%)               | 0.49                     |
| Spinal Injuries                     | Incidence  | 0.3 (0.2–0.3)         | -29% (-65.1 to 58.3%)              | 5.4 (4.4–6.8)         | -66.9% (-83.5 to -29.6%)           | 0.69                     |
|                                     | Prevalence | 34.6 (12–93)          | 166% (136.8 to 180.4%)             | 813.9 (289.2–2164.2)  | 16.1% (1.3 to 24%)                 | 0.65                     |
|                                     | YLDs       | 13.3 (4.3–37.1)       | 148.8% (118.7 to 168.3%)           | 309 (100.2–843.4)     | 9.3% (-5.8 to 17.9%)               | 0.64                     |
| <b>Oman</b>                         |            |                       |                                    |                       |                                    |                          |
| Minor TBI                           | Incidence  | 7.9 (6.1–10)          | 130.7% (110.9 to 151.6%)           | 160.4 (125.9–202.6)   | -6.3% (-12.8 to 0.2%)              | 0.57                     |
|                                     | Prevalence | 4.9 (4.5–5.3)         | 186.1% (174.5 to 198.9%)           | 123.1 (114.3–132.7)   | -6.7% (-9.6 to -3.3%)              | 0.60                     |

**Table S14** Incidence, prevalence, and disability of head and spinal injuries in the world and in North Africa and Middle East countries

| Location<br>Cause                   |            | All Ages              |                                    | Age-standardised      |                                    | Sex ratio<br>2019<br>F:M |
|-------------------------------------|------------|-----------------------|------------------------------------|-----------------------|------------------------------------|--------------------------|
|                                     |            | Number (thousand)     | Percent change                     | Rate per 100,000      | Percent change                     |                          |
|                                     |            | 2019<br>Mean (95% UI) | From 1990 to 2019<br>Mean (95% UI) | 2019<br>Mean (95% UI) | From 1990 to 2019<br>Mean (95% UI) |                          |
| Moderate/Severe TBI                 | YLDs       | 0.6 (0.4–0.8)         | 187.2% (151.7 to 228.9%)           | 14.7 (10.1–20.3)      | -7.1% (-16.1 to 3.1%)              | 0.59                     |
|                                     | Incidence  | 9.2 (8–10.6)          | 136.4% (118.7 to 154%)             | 225.6 (197.4–254.5)   | -7.8% (-13.2 to -2.1%)             | 0.60                     |
|                                     | Prevalence | 23.3 (21.8–24.8)      | 199.2% (190.9 to 207.4%)           | 555.9 (526.6–589)     | -4.6% (-6.9 to -2.4%)              | 0.57                     |
| Spinal cord lesion at neck level    | YLDs       | 3.7 (2.5–5)           | 198.1% (178.1 to 217.8%)           | 85.5 (60.2–116.3)     | -5.1% (-9.6 to -0.1%)              | 0.56                     |
|                                     | Incidence  | 0.2 (0.1–0.2)         | 151.3% (130.4 to 178.4%)           | 3.7 (2.7–5)           | -1.7% (-10.1 to 8%)                | 0.66                     |
|                                     | Prevalence | 3.9 (3.6–4.2)         | 244.2% (226.7 to 260.7%)           | 82 (76.4–88.2)        | 11.7% (7 to 16.9%)                 | 0.63                     |
| Spinal cord lesion below neck level | YLDs       | 1.5 (1–2)             | 215.3% (160.8 to 278.1%)           | 31.1 (21.6–40.7)      | 2% (-12.4 to 18.4%)                | 0.62                     |
|                                     | Incidence  | 0.1 (0.1–0.2)         | 154.3% (130.3 to 180.2%)           | 3.1 (2.3–4.3)         | 0.9% (-8.1 to 10.2%)               | 0.78                     |
|                                     | Prevalence | 3.5 (3.3–3.8)         | 232% (215.9 to 249.7%)             | 78.2 (72.9–83.7)      | 6.9% (2.3 to 12.1%)                | 0.74                     |
| Head Injuries                       | YLDs       | 0.6 (0.4–0.8)         | 134.1% (91.5 to 183.7%)            | 13.3 (9.1–17.9)       | -24.6% (-36 to -11.4%)             | 0.72                     |
|                                     | Incidence  | 17.1 (14.7–19.9)      | 133.7% (117.4 to 152.2%)           | 386 (336.3–438.3)     | -7.2% (-11.9 to -2%)               | 0.59                     |
|                                     | Prevalence | 28.1 (26.7–29.8)      | 196.9% (189 to 204.2%)             | 679 (649.3–713.3)     | -5% (-7.1 to -3.1%)                | 0.58                     |
| Spinal Injuries                     | YLDs       | 4.2 (2.9–5.8)         | 196.5% (179.6 to 214.8%)           | 100.2 (70.5–136.3)    | -5.4% (-9.6 to -0.8%)              | 0.57                     |
|                                     | Incidence  | 0.3 (0.2–0.4)         | 152.6% (134.3 to 174.8%)           | 6.8 (5.4–8.5)         | -0.5% (-7.3 to 6.9%)               | 0.71                     |
|                                     | Prevalence | 7.4 (6.9–8)           | 238.3% (223.6 to 252.6%)           | 160.2 (150.2–171.2)   | 9.3% (5.5 to 13.7%)                | 0.68                     |
|                                     | YLDs       | 2.1 (1.5–2.8)         | 186.5% (148.6 to 232.1%)           | 44.4 (31.2–57.6)      | -7.8% (-17.9 to 4.1%)              | 0.65                     |
| <b>Qatar</b>                        |            |                       |                                    |                       |                                    |                          |
| Minor TBI                           | Incidence  | 5.9 (4.4–7.8)         | 507.3% (454.1 to 560%)             | 172.2 (131.9–224.1)   | -8.8% (-15.3 to -2%)               | 0.56                     |
|                                     | Prevalence | 3.5 (3.2–3.9)         | 570.1% (540.5 to 601.1%)           | 126.8 (117.1–137.9)   | -9.4% (-12.8 to -5.8%)             | 0.59                     |
|                                     | YLDs       | 0.4 (0.3–0.6)         | 570.2% (479.3 to 670.4%)           | 15.1 (10.4–20.8)      | -10% (-19 to 0%)                   | 0.58                     |
| Moderate/Severe TBI                 | Incidence  | 6 (5.2–6.8)           | 494.4% (457.7 to 532.6%)           | 201.8 (178.6–226.2)   | -10.8% (-15.1 to -5.7%)            | 0.56                     |
|                                     | Prevalence | 15.5 (14.4–16.7)      | 558.5% (539.7 to 582%)             | 537.2 (509.1–572.8)   | -9.8% (-12.2 to -7%)               | 0.54                     |
|                                     | YLDs       | 2.4 (1.7–3.3)         | 555.4% (509.1 to 605.4%)           | 82.1 (58.3–112.1)     | -10.6% (-15.3 to -5.6%)            | 0.53                     |
| Spinal cord lesion at neck level    | Incidence  | 0.1 (0.1–0.1)         | 543.4% (481.6 to 605.7%)           | 3.6 (2.7–4.7)         | -3.9% (-12.8 to 4.7%)              | 0.62                     |
|                                     | Prevalence | 2.8 (2.6–3.1)         | 617.8% (580.9 to 658.7%)           | 87.9 (81.6–95)        | 0.4% (-4.3 to 5.2%)                | 0.64                     |
|                                     | YLDs       | 1.1 (0.7–1.4)         | 551.9% (436.1 to 676.7%)           | 32.9 (23.2–42.7)      | -9.4% (-21.7 to 3.9%)              | 0.63                     |
| Spinal cord lesion below neck level | Incidence  | 0.1 (0.1–0.1)         | 552.3% (487.8 to 614.1%)           | 3.1 (2.3–4.1)         | -2.3% (-11.2 to 6.5%)              | 0.70                     |
|                                     | Prevalence | 2.6 (2.4–2.8)         | 618.3% (581 to 653.8%)             | 83.6 (77.5–89.7)      | -1.5% (-6.2 to 3%)                 | 0.72                     |
|                                     | YLDs       | 0.4 (0.3–0.6)         | 396.5% (302.9 to 501.6%)           | 13.8 (9.3–19.1)       | -32.1% (-42.1 to -21.3%)           | 0.71                     |
| Head Injuries                       | Incidence  | 11.9 (10.1–14.1)      | 500.7% (462.3 to 540.7%)           | 374 (324.5–433.9)     | -9.9% (-14.5 to -5.1%)             | 0.56                     |
|                                     | Prevalence | 19 (17.9–20.2)        | 560.7% (543.2 to 581%)             | 663.9 (631.7–701.2)   | -9.7% (-11.8 to -7.3%)             | 0.55                     |
|                                     | YLDs       | 2.9 (2–3.9)           | 557.5% (514.3 to 600.8%)           | 97.2 (68.5–132.2)     | -10.5% (-14.8 to -6.2%)            | 0.54                     |
| Spinal Injuries                     | Incidence  | 0.2 (0.2–0.2)         | 547.5% (494.8 to 597%)             | 6.7 (5.5–8.1)         | -3.2% (-10.3 to 3.5%)              | 0.66                     |
|                                     | Prevalence | 5.4 (5–5.9)           | 618% (588.7 to 648%)               | 171.5 (159.9–184.2)   | -0.5% (-4.4 to 3.4%)               | 0.68                     |
|                                     | YLDs       | 1.5 (1.1–2)           | 498% (415.6 to 588.7%)             | 46.7 (32.9–61.2)      | -17.5% (-26.8 to -8.3%)            | 0.65                     |
| <b>Saudi Arabia</b>                 |            |                       |                                    |                       |                                    |                          |
| Minor TBI                           | Incidence  | 117.1 (86.1–157.9)    | 197.8% (166.1 to 230.5%)           | 284.5 (210.9–377.8)   | 22.1% (11.4 to 32%)                | 0.40                     |
|                                     | Prevalence | 72.4 (64.7–81.7)      | 289.9% (266.5 to 315.1%)           | 215.3 (195.4–239.6)   | 25% (18.7 to 31.4%)                | 0.44                     |
|                                     | YLDs       | 8.8 (6.1–12.2)        | 290.8% (251.8 to 331.7%)           | 25.6 (17.7–35.4)      | 24.5% (14.3 to 35.2%)              | 0.43                     |
| Moderate/Severe TBI                 | Incidence  | 125.1 (108.6–142.1)   | 251% (230.8 to 271.9%)             | 343.4 (299.5–385.7)   | 28.7% (23.3 to 33.6%)              | 0.49                     |
|                                     | Prevalence | 297.4 (274.9–323.9)   | 318% (301.9 to 333.9%)             | 855.4 (798–919.3)     | 25.6% (22.1 to 29%)                | 0.47                     |
|                                     | YLDs       | 46.3 (32.1–64)        | 315% (290.4 to 340.2%)             | 130.5 (91.7–179.2)    | 25% (19.6 to 31.1%)                | 0.46                     |
| Spinal cord lesion at neck level    | Incidence  | 2.3 (1.7–3)           | 260.3% (233.4 to 287.8%)           | 6.2 (4.5–8.3)         | 34.4% (25.8 to 43.2%)              | 0.54                     |
|                                     | Prevalence | 50.1 (45.5–55.1)      | 326.2% (303.3 to 352.5%)           | 126.1 (115.6–137.9)   | 29.1% (23.1 to 35.6%)              | 0.51                     |
|                                     | YLDs       | 19.3 (13.5–25.4)      | 288.1% (238.2 to 346.9%)           | 47.8 (33.5–61.8)      | 17.9% (3.9 to 33.1%)               | 0.50                     |
| Spinal cord lesion below neck level | Incidence  | 2 (1.5–2.7)           | 248.3% (220.3 to 275.4%)           | 5.5 (4–7.3)           | 32% (23.1 to 40.7%)                | 0.59                     |
|                                     | Prevalence | 49.2 (45.2–53.9)      | 312.1% (288.7 to 337%)             | 130.3 (121–141.7)     | 25.5% (19.3 to 31.9%)              | 0.54                     |
|                                     | YLDs       | 8.7 (5.9–12)          | 187.4% (146.5 to 235.9%)           | 22.8 (15.4–30.7)      | -12.2% (-24 to 0.8%)               | 0.54                     |
| Head Injuries                       | Incidence  | 242.2 (207–286.7)     | 223.1% (200.7 to 246.1%)           | 627.9 (541.6–735)     | 25.6% (19.3 to 32.2%)              | 0.45                     |
|                                     | Prevalence | 369.8 (344.8–397.3)   | 312.2% (298.2 to 325.3%)           | 1070.7 (1008.3–1140)  | 25.5% (22.3 to 28.3%)              | 0.46                     |

**Table S14** Incidence, prevalence, and disability of head and spinal injuries in the world and in North Africa and Middle East countries

| Location<br>Cause                   |            | All Ages              |                                    | Age-standardised      |                                    | Sex ratio<br>2019<br>F:M |
|-------------------------------------|------------|-----------------------|------------------------------------|-----------------------|------------------------------------|--------------------------|
|                                     |            | Number (thousand)     | Percent change                     | Rate per 100,000      | Percent change                     |                          |
|                                     |            | 2019<br>Mean (95% UI) | From 1990 to 2019<br>Mean (95% UI) | 2019<br>Mean (95% UI) | From 1990 to 2019<br>Mean (95% UI) |                          |
| Spinal Injuries                     | YLDs       | 55.1 (38.6–75.3)      | 310.9% (289.1 to 332.1%)           | 156.1 (109.5–212.2)   | 25% (20.1 to 29.7%)                | 0.45                     |
|                                     | Incidence  | 4.3 (3.5–5.3)         | 254.6% (231.5 to 279.4%)           | 11.7 (9.3–14.4)       | 33.3% (26.1 to 40.4%)              | 0.56                     |
|                                     | Prevalence | 99.2 (90.7–108.8)     | 319.1% (298.7 to 340.4%)           | 256.4 (236.7–279.5)   | 27.2% (21.8 to 32.6%)              | 0.53                     |
|                                     | YLDs       | 28 (19.9–36.8)        | 249.9% (213.8 to 290.2%)           | 70.6 (50.1–92.2)      | 6.2% (-3.8 to 16.6%)               | 0.51                     |
| <b>Syrian Arab Republic</b>         |            |                       |                                    |                       |                                    |                          |
| Minor TBI                           | Incidence  | 30.7 (19.6–53.8)      | 106.8% (42 to 263%)                | 235 (142.5–434.7)     | 128.9% (47.1 to 316.5%)            | 0.75                     |
|                                     | Prevalence | 37.6 (19.7–71.9)      | 389% (193 to 722.1%)               | 286.9 (147.5–571.1)   | 234.4% (91.4 to 478.2%)            | 0.63                     |
|                                     | YLDs       | 4.5 (2.4–8.4)         | 381.2% (188 to 723%)               | 33.9 (17.7–64)        | 227.3% (88.4 to 477.2%)            | 0.62                     |
| Moderate/Severe TBI                 | Incidence  | 22.1 (17.4–31.6)      | 77.7% (44.4 to 150.7%)             | 178.5 (129.9–286.4)   | 63.9% (21.8 to 156.4%)             | 0.69                     |
|                                     | Prevalence | 74.3 (52.4–129.4)     | 200.3% (121.1 to 369.7%)           | 546.8 (376.2–974.9)   | 84.6% (31.4 to 194.7%)             | 0.51                     |
|                                     | YLDs       | 11.3 (7.1–18.4)       | 190.3% (112.9 to 363%)             | 82.5 (51.2–136.2)     | 80.6% (30.3 to 196.7%)             | 0.51                     |
| Spinal cord lesion at neck level    | Incidence  | 2.4 (0.8–6.8)         | 829.2% (215.8 to 2114.1%)          | 23.3 (6.6–66.7)       | 960.5% (221.7 to 2587.9%)          | 0.98                     |
|                                     | Prevalence | 138.4 (38–399.5)      | 1049.3% (458.8 to 2231.5%)         | 989.8 (275.3–2883.5)  | 801.4% (319.5 to 1724%)            | 0.55                     |
|                                     | YLDs       | 55 (14.6–158.3)       | 957.7% (407.5 to 2102.3%)          | 391.5 (102.9–1140.2)  | 734.9% (290.4 to 1616.7%)          | 0.54                     |
| Spinal cord lesion below neck level | Incidence  | 0.3 (0.2–0.4)         | 50.5% (35.9 to 73.6%)              | 2.4 (1.8–3.1)         | 34% (17.3 to 67.3%)                | 1.06                     |
|                                     | Prevalence | 8.4 (7.8–9.1)         | 98.9% (88.9 to 110.6%)             | 59.1 (54.6–63.9)      | 25% (18.5 to 33.2%)                | 0.98                     |
|                                     | YLDs       | 1.7 (1.2–2.3)         | 47.4% (23.8 to 75.6%)              | 11.7 (8.2–16)         | -6.4% (-19.9 to 9.5%)              | 0.96                     |
| Head Injuries                       | Incidence  | 52.8 (39.5–76.8)      | 93.5% (49.1 to 182.8%)             | 413.5 (297.4–625.7)   | 95.4% (43.6 to 192.7%)             | 0.73                     |
|                                     | Prevalence | 111.9 (77.5–171.1)    | 245.1% (153.3 to 392.3%)           | 833.7 (566.3–1291.1)  | 118.2% (55.8 to 220.8%)            | 0.55                     |
|                                     | YLDs       | 15.8 (10.6–23)        | 227.2% (146 to 379.1%)             | 116.4 (75.7–170)      | 107.7% (51.8 to 211.9%)            | 0.54                     |
| Spinal Injuries                     | Incidence  | 2.8 (1.1–7.1)         | 482.8% (137.9 to 1262.7%)          | 25.7 (8.8–69.2)       | 548.3% (131.1 to 1510.3%)          | 0.99                     |
|                                     | Prevalence | 146.8 (46.4–407.9)    | 801.9% (347 to 1631.3%)            | 1048.9 (332.6–2942)   | 567.8% (215.4 to 1184.7%)          | 0.57                     |
|                                     | YLDs       | 56.7 (16.1–159.7)     | 794.6% (325.3 to 1703.5%)          | 403.2 (112.6–1150.3)  | 579.2% (218.2 to 1263.6%)          | 0.55                     |
| <b>Tunisia</b>                      |            |                       |                                    |                       |                                    |                          |
| Minor TBI                           | Incidence  | 14.2 (11.1–18.1)      | 26.7% (17.9 to 35.4%)              | 125.3 (97.1–160.4)    | 1% (-4.9 to 7.5%)                  | 0.54                     |
|                                     | Prevalence | 11.8 (11–12.7)        | 94.2% (86.2 to 102.1%)             | 94.1 (87.5–101.3)     | 2.7% (-0.5 to 5.7%)                | 0.57                     |
|                                     | YLDs       | 1.4 (1–2)             | 93% (72.6 to 115.7%)               | 11.3 (7.8–15.5)       | 2.3% (-7.9 to 13.4%)               | 0.56                     |
| Moderate/Severe TBI                 | Incidence  | 17.5 (15.5–19.8)      | 59.1% (49.6 to 69.2%)              | 148.4 (130.9–166.6)   | 5.4% (0.9 to 9.9%)                 | 0.56                     |
|                                     | Prevalence | 51.8 (49.3–54.7)      | 106% (100.6 to 111.8%)             | 401.9 (382.3–424.2)   | 4.3% (2 to 7.1%)                   | 0.56                     |
|                                     | YLDs       | 8 (5.6–10.9)          | 102.6% (90.6 to 115.6%)            | 61.7 (43.4–84.2)      | 3.8% (-1.7 to 9.7%)                | 0.55                     |
| Spinal cord lesion at neck level    | Incidence  | 0.3 (0.2–0.4)         | 60.3% (45.7 to 75.1%)              | 2.6 (2–3.5)           | 7.6% (-1.7 to 16.9%)               | 0.64                     |
|                                     | Prevalence | 8.5 (7.9–9.2)         | 103.7% (92.5 to 115.1%)            | 66.5 (61.8–72)        | 10.7% (4.8 to 17.2%)               | 0.67                     |
|                                     | YLDs       | 3.3 (2.3–4.2)         | 86.9% (57.7 to 116.2%)             | 25.4 (18.1–32.9)      | 2.8% (-11.4 to 17.7%)              | 0.65                     |
| Spinal cord lesion below neck level | Incidence  | 0.3 (0.2–0.4)         | 53.3% (38.3 to 70%)                | 2.2 (1.7–3)           | 4.4% (-4.9 to 13.8%)               | 0.75                     |
|                                     | Prevalence | 8.2 (7.6–8.8)         | 99.6% (88.9 to 109.6%)             | 63.4 (59.5–68.5)      | 6.5% (1.3 to 11.7%)                | 0.75                     |
|                                     | YLDs       | 1.5 (1–2)             | 47.8% (25.3 to 72.8%)              | 11.3 (7.8–15.5)       | -20.3% (-31.9 to -7.5%)            | 0.74                     |
| Head Injuries                       | Incidence  | 31.8 (27.6–36.6)      | 42.7% (34.4 to 51.4%)              | 273.7 (237.6–316.6)   | 3.3% (-1 to 8.1%)                  | 0.55                     |
|                                     | Prevalence | 63.6 (60.8–66.7)      | 103.7% (98.7 to 108.9%)            | 496 (474.4–519)       | 4% (1.9 to 6.4%)                   | 0.56                     |
|                                     | YLDs       | 9.4 (6.6–12.8)        | 101.1% (90.9 to 112.3%)            | 73 (51.3–99.5)        | 3.5% (-1.5 to 8.8%)                | 0.55                     |
| Spinal Injuries                     | Incidence  | 0.6 (0.5–0.7)         | 57% (45.4 to 69.3%)                | 4.9 (4–6)             | 6.1% (-0.9 to 13%)                 | 0.69                     |
|                                     | Prevalence | 16.7 (15.7–17.9)      | 101.7% (91.9 to 110.6%)            | 129.9 (121.8–139.6)   | 8.6% (3.7 to 13.4%)                | 0.71                     |
|                                     | YLDs       | 4.7 (3.4–6.1)         | 72.8% (51.4 to 94.8%)              | 36.7 (26.5–47.6)      | -5.7% (-16 to 5.6%)                | 0.68                     |
| <b>Türkiye</b>                      |            |                       |                                    |                       |                                    |                          |
| Minor TBI                           | Incidence  | 97.6 (76.1–124.4)     | 31.9% (17.9 to 47.6%)              | 120.6 (94.2–153.3)    | 4.8% (-5.2 to 16.7%)               | 0.62                     |
|                                     | Prevalence | 83.4 (76.7–91.2)      | 115% (103.9 to 127.6%)             | 93.3 (85.8–102)       | 16.9% (11.6 to 23.5%)              | 0.64                     |



**Table S14** Incidence, prevalence, and disability of head and spinal injuries in the world and in North Africa and Middle East countries

| Location<br>Cause                   |            | All Ages              |                                    | Age-standardised      |                                    | Sex ratio<br>2019<br>F:M |
|-------------------------------------|------------|-----------------------|------------------------------------|-----------------------|------------------------------------|--------------------------|
|                                     |            | Number (thousand)     | Percent change                     | Rate per 100,000      | Percent change                     |                          |
|                                     |            | 2019<br>Mean (95% UI) | From 1990 to 2019<br>Mean (95% UI) | 2019<br>Mean (95% UI) | From 1990 to 2019<br>Mean (95% UI) |                          |
| Moderate/Severe TBI                 | YLDs       | 10 (7.2–13.7)         | 113.9% (89.8 to 141.7%)            | 11.2 (8–15.3)         | 16.5% (5 to 30.4%)                 | 0.63                     |
|                                     | Incidence  | 121.7 (106.8–137.9)   | 80.3% (66.7 to 93.9%)              | 144.5 (127–163.6)     | 19.9% (12.1 to 27.7%)              | 0.70                     |
|                                     | Prevalence | 344.7 (325.6–366.9)   | 128.6% (120.2 to 138.6%)           | 377.8 (357.6–401.5)   | 20.3% (16 to 25.1%)                | 0.63                     |
| Spinal cord lesion at neck level    | YLDs       | 52.8 (38–71.2)        | 124.6% (110.2 to 140.4%)           | 57.9 (41.6–78)        | 19.4% (12.4 to 27.3%)              | 0.62                     |
|                                     | Incidence  | 2.4 (1.8–3.1)         | 45.4% (3.5 to 87.6%)               | 2.9 (2.1–3.8)         | 1.3% (-25 to 26.1%)                | 0.79                     |
|                                     | Prevalence | 77.2 (61.9–109.1)     | 191.5% (147.8 to 272.8%)           | 83.9 (67.3–118.5)     | 64.9% (38.9 to 114.4%)             | 0.72                     |
| Spinal cord lesion below neck level | YLDs       | 29.3 (19.2–43.2)      | 158.9% (104.8 to 244.2%)           | 31.9 (20.9–47.3)      | 47.9% (17.7 to 99.9%)              | 0.70                     |
|                                     | Incidence  | 2 (1.5–2.6)           | 85% (61.4 to 115.1%)               | 2.4 (1.8–3.1)         | 25.7% (10.9 to 43.3%)              | 0.89                     |
|                                     | Prevalence | 62 (56.1–72.3)        | 139% (120.7 to 170.1%)             | 67.5 (61.1–78.6)      | 31.1% (21.3 to 46.9%)              | 0.81                     |
| Head Injuries                       | YLDs       | 10.8 (7.3–15.2)       | 56.6% (28.6 to 89.6%)              | 11.8 (8–16.5)         | -13.3% (-28.3 to 5%)               | 0.79                     |
|                                     | Incidence  | 219.3 (191.6–255)     | 55% (43.4 to 66.5%)                | 265.1 (231.6–308)     | 12.5% (5.2 to 20%)                 | 0.66                     |
|                                     | Prevalence | 428.1 (407.3–451.7)   | 125.8% (118.6 to 134.6%)           | 471.1 (448.7–496.4)   | 19.6% (16.1 to 24.1%)              | 0.63                     |
| Spinal Injuries                     | YLDs       | 62.8 (45.2–85)        | 122.8% (109.8 to 137.1%)           | 69.1 (49.6–93.2)      | 18.9% (12.6 to 26.1%)              | 0.62                     |
|                                     | Incidence  | 4.4 (3.6–5.4)         | 61.1% (27.9 to 89.6%)              | 5.3 (4.3–6.5)         | 11.1% (-9 to 28.1%)                | 0.84                     |
|                                     | Prevalence | 139.2 (121.5–172.1)   | 165.6% (139.5 to 213.1%)           | 151.4 (132.4–187.8)   | 47.9% (32.9 to 75.7%)              | 0.76                     |
|                                     | YLDs       | 40.2 (27.3–56.8)      | 120.1% (83.7 to 175.5%)            | 43.7 (29.7–61.9)      | 24.2% (3.7 to 55.5%)               | 0.73                     |
| <b>United Arab Emirates</b>         |            |                       |                                    |                       |                                    |                          |
| Minor TBI                           | Incidence  | 14.6 (11.2–18.7)      | 361.1% (328.6 to 396.4%)           | 145.1 (114.4–184)     | -6.6% (-10.9 to -1.9%)             | 0.60                     |
|                                     | Prevalence | 11.5 (10.6–12.4)      | 573.8% (546.6 to 605.7%)           | 113.4 (105.8–122.1)   | -5.4% (-8.2 to -2.5%)              | 0.64                     |
|                                     | YLDs       | 1.4 (0.9–1.9)         | 573.3% (479.2 to 684.7%)           | 13.5 (9.2–18.4)       | -5.9% (-14.6 to 4.2%)              | 0.63                     |
| Moderate/Severe TBI                 | Incidence  | 18.6 (16–21.6)        | 450.9% (410.4 to 495.7%)           | 184.6 (162.9–208.5)   | -8.4% (-12.1 to -4.7%)             | 0.62                     |
|                                     | Prevalence | 54.8 (51.3–58.9)      | 616.8% (587.1 to 640.8%)           | 480.1 (455.6–509.7)   | -4.1% (-6.8 to -2%)                | 0.61                     |
|                                     | YLDs       | 8.6 (6–11.8)          | 609% (552.6 to 668.7%)             | 73.8 (51.8–100.8)     | -4.7% (-9.8 to 0.7%)               | 0.59                     |
| Spinal cord lesion at neck level    | Incidence  | 0.3 (0.2–0.4)         | 456.4% (419.8 to 497%)             | 3.1 (2.3–4.1)         | -3.7% (-9.6 to 2.1%)               | 0.67                     |
|                                     | Prevalence | 9.1 (8.4–9.8)         | 582.7% (532 to 620.7%)             | 70.6 (66–75.8)        | -1.9% (-7.3 to 2.6%)               | 0.71                     |
|                                     | YLDs       | 3.7 (2.6–4.8)         | 541.4% (419.2 to 694%)             | 28.2 (20–36.2)        | -7.3% (-20.9 to 8.8%)              | 0.70                     |
| Spinal cord lesion below neck level | Incidence  | 0.3 (0.2–0.3)         | 443.4% (407.2 to 485.6%)           | 2.6 (1.9–3.5)         | -3.2% (-9.1 to 2.6%)               | 0.78                     |
|                                     | Prevalence | 8.2 (7.6–8.8)         | 606.3% (573.7 to 636.9%)           | 68.1 (63.8–72.6)      | -0.6% (-4.2 to 3.1%)               | 0.80                     |
|                                     | YLDs       | 1.8 (1.2–2.5)         | 482.4% (373.3 to 611%)             | 14.7 (10.3–19.6)      | -17.5% (-29.3 to -5.1%)            | 0.78                     |
| Head Injuries                       | Incidence  | 33.2 (28.5–38.6)      | 407.5% (374.1 to 445.5%)           | 329.7 (286.2–378.1)   | -7.6% (-11.2 to -3.8%)             | 0.61                     |
|                                     | Prevalence | 66.3 (62.6–70.3)      | 609% (583.8 to 628.9%)             | 593.5 (566.6–623.9)   | -4.4% (-6.7 to -2.6%)              | 0.61                     |
|                                     | YLDs       | 10 (7–13.7)           | 603.8% (555.7 to 656.9%)           | 87.3 (60.9–119.3)     | -4.9% (-9.5 to 0%)                 | 0.60                     |
| Spinal Injuries                     | Incidence  | 0.6 (0.5–0.7)         | 450.4% (416.7 to 487.7%)           | 5.6 (4.6–7)           | -3.5% (-8.2 to 1.3%)               | 0.72                     |
|                                     | Prevalence | 17.3 (16.1–18.6)      | 593.7% (558.7 to 620.8%)           | 138.6 (130.6–148.2)   | -1.2% (-5.1 to 1.8%)               | 0.75                     |
|                                     | YLDs       | 5.5 (3.8–7.1)         | 520.7% (428.5 to 622.5%)           | 42.9 (30.9–54.8)      | -11.1% (-21.3 to -1.1%)            | 0.73                     |
| <b>Yemen</b>                        |            |                       |                                    |                       |                                    |                          |
| Minor TBI                           | Incidence  | 114 (60.4–238.1)      | 588.9% (261.5 to 1352%)            | 320.2 (173.7–647.9)   | 178.2% (50.4 to 483.7%)            | 0.51                     |
|                                     | Prevalence | 34.6 (23.9–56.3)      | 309% (215.5 to 466%)               | 144.6 (103.2–223.6)   | 48.1% (14.5 to 102.6%)             | 0.57                     |
|                                     | YLDs       | 4.1 (2.5–7.1)         | 301.3% (202.1 to 461.8%)           | 17 (10.6–27.5)        | 45.5% (10.5 to 98.8%)              | 0.56                     |
| Moderate/Severe TBI                 | Incidence  | 50.9 (39.1–74.7)      | 238.1% (167.8 to 390.1%)           | 175.5 (138.7–249.2)   | 29.8% (5.1 to 82.7%)               | 0.48                     |
|                                     | Prevalence | 83.1 (73.7–102.1)     | 195.9% (175.2 to 236.2%)           | 379.9 (337.2–466.3)   | 10.6% (2.2 to 29.3%)               | 0.52                     |
|                                     | YLDs       | 13 (9.1–17.6)         | 195.8% (166.6 to 240.6%)           | 58.2 (41.4–78.6)      | 10.3% (-0.1 to 29.2%)              | 0.51                     |
| Spinal cord lesion at neck level    | Incidence  | 8.2 (2.4–23.5)        | 3053.8% (811.8 to 8943%)           | 24 (7.4–68.4)         | 959.8% (223.3 to 3055.5%)          | 0.55                     |
|                                     | Prevalence | 56.2 (22.1–148.1)     | 404.1% (276.1 to 506.9%)           | 207.3 (84.5–545.3)    | 114% (45.9 to 178.7%)              | 0.66                     |
|                                     | YLDs       | 24.2 (9.2–62.7)       | 379.2% (246.7 to 490.5%)           | 87.2 (33.8–224.9)     | 101.8% (38.9 to 162.4%)            | 0.64                     |
| Spinal cord lesion below neck level | Incidence  | 0.6 (0.4–0.8)         | 143.8% (131.1 to 156.5%)           | 2 (1.5–2.6)           | 0.1% (-4.8 to 5%)                  | 0.71                     |
|                                     | Prevalence | 12.5 (11.6–13.3)      | 166% (145.8 to 180.6%)             | 52.7 (49.1–56.5)      | 0.4% (-6.1 to 5%)                  | 0.72                     |
|                                     | YLDs       | 3.3 (2.3–4.3)         | 128.1% (92.4 to 171.5%)            | 13.7 (9.5–17.9)       | -13.8% (-25.9 to 0%)               | 0.70                     |
| Head Injuries                       | Incidence  | 164.9 (108.3–287.7)   | 421.8% (240.8 to 822.5%)           | 495.8 (338.5–840.9)   | 98.1% (35.1 to 236.3%)             | 0.50                     |

**Table S14** Incidence, prevalence, and disability of head and spinal injuries in the world and in North Africa and Middle East countries

| Location<br>Cause                   |            | All Ages              |                                    | Age-standardised      |                                    | Sex<br>ratio<br>2019<br>F:M |
|-------------------------------------|------------|-----------------------|------------------------------------|-----------------------|------------------------------------|-----------------------------|
|                                     |            | Number (thousand)     | Percent change                     | Rate per 100,000      | Percent change                     |                             |
|                                     |            | 2019<br>Mean (95% UI) | From 1990 to 2019<br>Mean (95% UI) | 2019<br>Mean (95% UI) | From 1990 to 2019<br>Mean (95% UI) |                             |
| Spinal Injuries                     | Prevalence | 117.7 (101.3–141.7)   | 222.1% (190.6 to 269.5%)           | 524.6 (456.2–626.3)   | 18.9% (7.1 to 35.6%)               | 0.53                        |
|                                     | YLDs       | 17.1 (12.1–23.4)      | 215.7% (182.1 to 263.2%)           | 75.2 (54.3–101.2)     | 16.7% (4.8 to 33.9%)               | 0.52                        |
|                                     | Incidence  | 8.8 (2.9–24.1)        | 1671.3% (510 to 4727.5%)           | 26 (9.3–70.3)         | 510.5% (122.1 to 1565%)            | 0.56                        |
|                                     | Prevalence | 68.6 (34.5–160.6)     | 333.7% (228.3 to 445.6%)           | 260 (136.8–594.8)     | 74.1% (25 to 134.1%)               | 0.67                        |
|                                     | YLDs       | 27.5 (12.2–66.4)      | 323.5% (208.3 to 439.2%)           | 100.9 (45.9–237.9)    | 70.7% (18.8 to 131.1%)             | 0.65                        |
| <b>Afghanistan</b>                  |            |                       |                                    |                       |                                    |                             |
| Minor TBI                           | Incidence  | 117.7 (64.7–236.6)    | 447.1% (322 to 601.1%)             | 361.4 (178.7–782.8)   | 107.2% (40.1 to 196.8%)            | 0.82                        |
|                                     | Prevalence | 70.2 (34.8–142.5)     | 116.1% (35.2 to 291.7%)            | 301 (139.5–639.5)     | -13.7% (-39.2 to 43.5%)            | 0.56                        |
|                                     | YLDs       | 8.3 (4–16.3)          | 115.1% (33.3 to 288.1%)            | 34.8 (16.1–71.7)      | -14.9% (-41 to 39.6%)              | 0.56                        |
| Moderate/Severe TBI                 | Incidence  | 55 (40.9–86.1)        | 317.1% (246.2 to 444.4%)           | 210.5 (135.1–378.6)   | 64.6% (16.1 to 154.3%)             | 0.53                        |
|                                     | Prevalence | 112.4 (77.4–202.8)    | 109.3% (33.3 to 229%)              | 473.6 (316.7–887.3)   | -20.4% (-45.2 to 15.6%)            | 0.40                        |
|                                     | YLDs       | 17.2 (10.8–29)        | 114% (34 to 237.5%)                | 70.8 (43.7–124.1)     | -19.7% (-44.9 to 17.1%)            | 0.39                        |
| Spinal cord lesion at neck level    | Incidence  | 9.8 (2.7–29)          | 831.4% (559.5 to 1047.8%)          | 41.7 (9.8–129.8)      | 369% (166 to 559.6%)               | 1.02                        |
|                                     | Prevalence | 214.8 (51.5–641.7)    | 28.9% (-23.3 to 330.8%)            | 755.2 (173–2296.9)    | -50.1% (-66.8 to 44.9%)            | 0.65                        |
|                                     | YLDs       | 94.5 (22.3–283.3)     | 25.1% (-25.6 to 315.1%)            | 325.6 (73.8–997.6)    | -52.1% (-68.1 to 36.6%)            | 0.64                        |
| Spinal cord lesion below neck level | Incidence  | 0.6 (0.5–0.8)         | 245.1% (222 to 274.5%)             | 2 (1.6–2.5)           | 10.1% (1.5 to 24.5%)               | 0.72                        |
|                                     | Prevalence | 14.5 (12.3–18.5)      | 284.9% (239 to 370.4%)             | 54.7 (46.1–71.2)      | 26.8% (10.7 to 57.7%)              | 0.62                        |
|                                     | YLDs       | 4.4 (3.1–6.2)         | 251.3% (173.4 to 354.2%)           | 16.4 (11.4–23.2)      | 14.3% (-8.5 to 49.6%)              | 0.61                        |
| Head Injuries                       | Incidence  | 172.7 (114.3–298.5)   | 397.7% (305.3 to 512.9%)           | 571.9 (346.5–1015.1)  | 89.2% (38.3 to 157.5%)             | 0.70                        |
|                                     | Prevalence | 182.5 (119.6–305.6)   | 111.9% (34.5 to 251%)              | 774.5 (486.3–1367)    | -17.9% (-42.8 to 24.8%)            | 0.46                        |
|                                     | YLDs       | 25.4 (16.5–40.5)      | 114.3% (34.3 to 250.9%)            | 105.6 (66.4–176.9)    | -18.2% (-43.5 to 22.8%)            | 0.44                        |
| Spinal Injuries                     | Incidence  | 10.5 (3.3–29.6)       | 742.6% (464 to 974%)               | 43.7 (11.8–131.7)     | 308.3% (115.4 to 502.2%)           | 1.00                        |
|                                     | Prevalence | 229.3 (65–655.6)      | 34.5% (-20.8 to 328.2%)            | 810 (224.5–2351)      | -48% (-65.9 to 41.6%)              | 0.65                        |
|                                     | YLDs       | 98.9 (26.4–287.5)     | 28.8% (-24.1 to 309.3%)            | 342 (87.3–1016.4)     | -50.7% (-67.5 to 33%)              | 0.64                        |
| <b>Sudan</b>                        |            |                       |                                    |                       |                                    |                             |
| Minor TBI                           | Incidence  | 51.6 (39.1–67.8)      | 6.8% (-44.6 to 69.3%)              | 119.6 (91.7–155.6)    | -46.5% (-71.3 to -16.5%)           | 0.52                        |
|                                     | Prevalence | 35.2 (30.1–43.9)      | 108.8% (83.3 to 128%)              | 121 (105.1–149.1)     | 3.5% (-4 to 11.2%)                 | 0.53                        |
|                                     | YLDs       | 4.3 (3–5.9)           | 111.3% (81.6 to 143.4%)            | 14.5 (10.2–19.7)      | 4.1% (-6.5 to 16.5%)               | 0.52                        |
| Moderate/Severe TBI                 | Incidence  | 18.2 (15–21.9)        | 65.7% (20.5 to 95.9%)              | 52.4 (43.3–62.4)      | -19.7% (-40 to -6.5%)              | 0.53                        |
|                                     | Prevalence | 41.7 (38.1–47.6)      | 127.1% (119.2 to 136.4%)           | 147.5 (135.4–166.9)   | 6.5% (2.7 to 11.7%)                | 0.49                        |
|                                     | YLDs       | 6.5 (4.6–8.8)         | 125.3% (103.1 to 148.6%)           | 22.5 (16.1–30.6)      | 5.5% (-3.4 to 15%)                 | 0.48                        |
| Spinal cord lesion at neck level    | Incidence  | 1.7 (1.3–2.4)         | -26.1% (-69.7 to 60.7%)            | 4.8 (3.4–6.6)         | -60.7% (-83.9 to -18.7%)           | 0.66                        |
|                                     | Prevalence | 54.8 (36.6–101.9)     | 198.7% (166.9 to 234.5%)           | 164.5 (112.8–296.7)   | 45.4% (26.3 to 70.1%)              | 0.70                        |
|                                     | YLDs       | 23.2 (13.8–46.6)      | 180.4% (136.6 to 222.8%)           | 68.8 (41.8–132.9)     | 36.7% (12.7 to 61.4%)              | 0.69                        |
| Spinal cord lesion below neck level | Incidence  | 1.6 (1.1–2.2)         | 127.2% (112.6 to 144.4%)           | 4.3 (3.1–6.1)         | 9.1% (2.2 to 16.9%)                | 0.73                        |
|                                     | Prevalence | 33.9 (31.3–36.9)      | 147.5% (134 to 163.4%)             | 109.4 (101.4–118.1)   | 14.9% (9.2 to 21.4%)               | 0.70                        |
|                                     | YLDs       | 8.7 (6.1–11.6)        | 108.5% (81.2 to 140.4%)            | 27.7 (19.5–36.5)      | -3.4% (-14.8 to 9%)                | 0.69                        |
| Head Injuries                       | Incidence  | 69.7 (56.1–87.5)      | 17.7% (-31.8 to 69.8%)             | 171.9 (140.9–212.8)   | -40.5% (-64.4 to -16.4%)           | 0.52                        |
|                                     | Prevalence | 76.8 (69.6–87.3)      | 118.3% (102.2 to 130.2%)           | 268.5 (244.4–303.9)   | 5.2% (0.6 to 10.1%)                | 0.51                        |
|                                     | YLDs       | 10.7 (7.8–14.4)       | 119.5% (99.9 to 139.2%)            | 37 (27–49.6)          | 4.9% (-1.9 to 12.7%)               | 0.49                        |
| Spinal Injuries                     | Incidence  | 3.3 (2.6–4.2)         | 8.9% (-48.2 to 87.2%)              | 9.1 (7.2–11.5)        | -43.6% (-72.1 to -7.9%)            | 0.69                        |
|                                     | Prevalence | 88.8 (69.3–135.8)     | 176.8% (154.2 to 208.3%)           | 274 (218.1–405.4)     | 31.5% (19.6 to 50.5%)              | 0.70                        |
|                                     | YLDs       | 31.9 (20.4–55.4)      | 156.3% (122.8 to 192.8%)           | 96.5 (63.1–164.2)     | 22.2% (5.5 to 42.6%)               | 0.69                        |

F:M, Female to male ratio; TBI, traumatic brain injury; UI uncertainty interval; YLDs, Years Lived with Disability. Data in parentheses are 95% uncertainty intervals. Count data in thousands and percentage data are rounded to one decimal place, and sex ratio is rounded to two decimal place. Percentages and number of YLDs, incident cases, and prevalent cases are not mutually exclusive: the sum of percentages and number of YLDs in the columns exceeds the totals for all injuries combined because of overlap between various causes. Measures with insufficient data are not reported here.



***Table S15 Burden of neurological conditions attributable to risk factors in North Africa and Middle East countries***

(NEXT PAGE)

All risk factors (p 277), Behavioural risk factors (p 282), Environmental/occupational risk factors (p 287), Metabolic risk factors (p 290), Air pollution (p 293), Alcohol use (p 296), Child and maternal malnutrition (p 299), Dietary risks (p 300), High body-mass index (p 302), High fasting plasma glucose (p 304), High LDL cholesterol (p 307), High systolic blood pressure (p 308), Kidney dysfunction (p 310), Low physical activity (p 312), Non-optimal temperature (p 312), Other environmental risks (p 314), Tobacco (p 316)

**Table S15** Burden of neurological conditions attributable to risk factors in North Africa and Middle East countries

| Risk factors                 | Causes       | Locations                    | DALYs (95% UI)     |                                     |                           |                                      |
|------------------------------|--------------|------------------------------|--------------------|-------------------------------------|---------------------------|--------------------------------------|
|                              |              |                              | PAF (%)<br>2019    | PAF change (%)<br>From 1990 to 2019 | Rate per 100,000<br>2019  | Rate change (%)<br>From 1990 to 2019 |
| <b>Combined risk factors</b> |              |                              |                    |                                     |                           |                                      |
| All risk factors             | Meningitis   | Global                       | 6.8% (6.1–7.7%)    | 12% (-2.8 to 28.5%)                 | 15.92 (12.67–20.6)        | -52% (-61.5 to -39.2%)               |
|                              |              | North Africa and Middle East | 7.1% (5.4–9.4%)    | -11.4% (-36.7 to 21.3%)             | 5 (3.51–6.99)             | -78.5% (-85.6 to -67.8%)             |
|                              |              | Algeria                      | 4.3% (2.6–6.6%)    | -9.5% (-53.1 to 79%)                | 1.72 (0.96–2.86)          | -81.8% (-91 to -62.4%)               |
|                              |              | Bahrain                      | 1.8% (1.2–2.5%)    | -54.2% (-73.9 to -21.6%)            | 0.33 (0.22–0.48)          | -88.3% (-93.6 to -79.2%)             |
|                              |              | Egypt                        | 9.5% (4.7–16.6%)   | -34.4% (-69.8 to 28.7%)             | 5.18 (2.15–9.91)          | -83.9% (-93.8 to -65.2%)             |
|                              |              | Iran                         | 4.4% (3.3–5.5%)    | -34.4% (-52.4 to -12.2%)            | 1.72 (1.22–2.28)          | -86.4% (-91.5 to -79.4%)             |
|                              |              | Iraq                         | 8.6% (5.5–12.4%)   | -17.6% (-56.2 to 48%)               | 5.8 (3.47–9.21)           | -83.5% (-91.6 to -67.4%)             |
|                              |              | Jordan                       | 5.9% (3.5–9.7%)    | -12.1% (-55.5 to 86.6%)             | 3.11 (1.73–5.62)          | -61.7% (-83 to -11.6%)               |
|                              |              | Kuwait                       | 6.2% (3.9–8.6%)    | 2% (-33.2 to 49.4%)                 | 1.25 (0.68–1.87)          | -62.2% (-78.1 to -40.6%)             |
|                              |              | Lebanon                      | 3.3% (1.7–5.5%)    | -54.1% (-79.4 to -5.6%)             | 0.96 (0.45–1.72)          | -85.5% (-93.9 to -69%)               |
|                              |              | Libya                        | 2.4% (1.5–4.1%)    | -66.7% (-82.9 to -35.1%)            | 0.88 (0.5–1.53)           | -89.9% (-95 to -80.2%)               |
|                              |              | Morocco                      | 10.2% (5.4–17.2%)  | -27.3% (-66.4 to 54%)               | 7 (3.26–13.01)            | -86.8% (-94.7 to -68%)               |
|                              |              | Palestine                    | 4% (2.6–5.9%)      | -29.8% (-62.8 to 30.5%)             | 1.64 (1–2.5)              | -87.7% (-93.8 to -75.9%)             |
|                              |              | Oman                         | 4.2% (2.4–7.4%)    | -36.2% (-66.6 to 24.9%)             | 1.04 (0.54–1.94)          | -83.3% (-91.7 to -64.3%)             |
|                              |              | Qatar                        | 3.4% (2.2–5.2%)    | -44% (-69.7 to 0.6%)                | 0.86 (0.55–1.33)          | -84.9% (-92.6 to -71.1%)             |
|                              |              | Saudi Arabia                 | 0.5% (0.3–0.8%)    | -64.4% (-85 to -25.8%)              | 0.12 (0.07–0.2)           | -90.5% (-95.6 to -80.6%)             |
|                              |              | Syrian Arab Republic         | 2.7% (1.5–4.4%)    | -53.2% (-78.4 to 1.8%)              | 2.64 (1.4–4.55)           | -86.3% (-93.7 to -69.1%)             |
|                              |              | Tunisia                      | 6.2% (3.7–9.8%)    | -7.1% (-52.2 to 86.5%)              | 2.34 (1.29–3.88)          | -78.7% (-89.9 to -55.9%)             |
|                              |              | Türkiye                      | 2% (1.3–3.2%)      | -37.1% (-66.4 to 19.4%)             | 0.52 (0.32–0.87)          | -93.6% (-96.9 to -86.5%)             |
|                              |              | United Arab Emirates         | 1.4% (0.7–3.5%)    | -72.4% (-87 to -45.4%)              | 0.45 (0.22–1.12)          | -92.9% (-96.5 to -85.7%)             |
|                              |              | Yemen                        | 5.3% (3–8.5%)      | -12.1% (-56.5 to 72.7%)             | 5.1 (2.78–8.83)           | -72.4% (-86.7 to -44.7%)             |
|                              |              | Afghanistan                  | 6.2% (3.1–10.9%)   | -8.8% (-57.3 to 105.5%)             | 14.96 (7.35–26.95)        | -75.9% (-89.3 to -45%)               |
|                              |              | Sudan                        | 5.3% (3–8.9%)      | -12.3% (-52.5 to 60.8%)             | 5.32 (2.78–9.71)          | -86.8% (-93.3 to -76.2%)             |
|                              | Encephalitis | Global                       | 2.5% (1.9–2.9%)    | 42.9% (2.2 to 91.2%)                | 1.61 (1.24–2.06)          | -34.6% (-56 to 1.4%)                 |
|                              |              | North Africa and Middle East | 3.8% (2.2–6.1%)    | 7.7% (-32.2 to 72.6%)               | 1.59 (0.94–2.57)          | -15.4% (-52.1 to 49.5%)              |
|                              |              | Algeria                      | 2.5% (1.2–4.5%)    | 22.7% (-45.9 to 179.7%)             | 0.47 (0.24–0.81)          | -12.7% (-64.2 to 112.4%)             |
|                              |              | Bahrain                      | 1% (0.6–1.6%)      | -33.6% (-66.9 to 30.6%)             | 0.12 (0.07–0.2)           | -50.5% (-77.4 to 0.3%)               |
|                              |              | Egypt                        | 6.8% (2.2–13.8%)   | 3.6% (-55.5 to 123.6%)              | 4.44 (0.8–10.08)          | -29.6% (-73 to 62.2%)                |
|                              |              | Iran                         | 3.7% (1.5–5%)      | 6.9% (-25.9 to 42.1%)               | 0.61 (0.21–0.87)          | -15.8% (-53.7 to 28.2%)              |
|                              |              | Iraq                         | 3.4% (1.6–5.9%)    | 9.1% (-48.9 to 137.9%)              | 2.43 (0.93–4.56)          | -27.5% (-69 to 73.9%)                |
|                              |              | Jordan                       | 1.5% (0.8–2.6%)    | -32.7% (-72.8 to 35.8%)             | 0.17 (0.08–0.29)          | -73.7% (-90.9 to -5.6%)              |
|                              |              | Kuwait                       | 2.3% (1.6–3.1%)    | 19.4% (-20.8 to 90.1%)              | 0.24 (0.15–0.34)          | -12.2% (-45.8 to 46.1%)              |
|                              |              | Lebanon                      | 2.6% (1.3–5%)      | -4.8% (-61.1 to 140.3%)             | 0.45 (0.19–0.87)          | -22.1% (-70.8 to 97.2%)              |
|                              |              | Libya                        | 2.5% (1.2–4.7%)    | -21% (-68.8 to 87%)                 | 0.42 (0.22–0.74)          | -28.7% (-74.1 to 73%)                |
|                              |              | Morocco                      | 5.7% (2–10.9%)     | -2.7% (-52.9 to 106.4%)             | 1.35 (0.64–2.54)          | -19.3% (-65.8 to 82.2%)              |
|                              |              | Palestine                    | 2% (1.1–3.3%)      | -10.6% (-59 to 100.5%)              | 0.32 (0.18–0.54)          | -29.7% (-70.3 to 56.6%)              |
|                              |              | Oman                         | 2% (1–3.7%)        | 0.5% (-56.9 to 150.7%)              | 2.45 (1.16–4.45)          | -43.8% (-76.9 to 36.5%)              |
|                              |              | Qatar                        | 1.6% (0.8–2.5%)    | -17.5% (-62.8 to 86.6%)             | 0.21 (0.11–0.38)          | -41.6% (-76.8 to 31.2%)              |
|                              |              | Saudi Arabia                 | 0.5% (0.1–1.8%)    | -1.3% (-72.5 to 123.4%)             | 0.15 (0.04–0.6)           | -49.8% (-87.4 to 7%)                 |
|                              |              | Syrian Arab Republic         | 1.5% (0.9–2.2%)    | -24.5% (-61.1 to 37.5%)             | 0.41 (0.24–0.7)           | -55.2% (-79.4 to -8.7%)              |
|                              |              | Tunisia                      | 2.8% (1.3–5.3%)    | 3.3% (-55.6 to 156.6%)              | 0.48 (0.25–0.86)          | -27.1% (-73.1 to 80.6%)              |
|                              |              | Türkiye                      | 0.9% (0.4–2%)      | -20.5% (-66.5 to 65.3%)             | 0.17 (0.08–0.36)          | -58.2% (-84.1 to -4.5%)              |
|                              |              | United Arab Emirates         | 2.2% (1.4–1%)      | -18.5% (-67.4 to 98.4%)             | 0.38 (0.17–0.71)          | -35.1% (-75.7 to 68.2%)              |
|                              |              | Yemen                        | 2.3% (1.1–4.7%)    | 3.4% (-56.1 to 163.3%)              | 0.69 (0.35–1.29)          | -3.7% (-58.3 to 134.1%)              |
|                              |              | Afghanistan                  | 1.2% (0.5–2.4%)    | 5.3% (-57.1 to 151.9%)              | 2.17 (0.88–5.44)          | -10.7% (-63.1 to 115.8%)             |
|                              |              | Sudan                        | 2.2% (1.1–4.1%)    | 0.8% (-58.1 to 164.8%)              | 0.66 (0.35–1.12)          | -22.8% (-67.6 to 98%)                |
|                              | Stroke       | Global                       | 86.4% (83.4–89.2%) | 1.2% (-0.01 to 2.5%)                | 1526.72 (1408.37–1642.57) | -34.5% (-40.2 to -29.2%)             |
|                              |              | North Africa and Middle East | 85.8% (82.6–89.1%) | 9.1% (4.8 to 14.4%)                 | 1566.95 (1393.24–1757.07) | -25.8% (-34.1 to -14%)               |

**Table S15** Burden of neurological conditions attributable to risk factors in North Africa and Middle East countries

| Risk factors | Causes           | Locations                    | DALYs (95% UI)     |                       |                           |                          |
|--------------|------------------|------------------------------|--------------------|-----------------------|---------------------------|--------------------------|
|              |                  |                              | PAF (%)            | PAF change (%)        | Rate per 100,000          | Rate change (%)          |
|              |                  |                              | 2019               | From 1990 to 2019     | 2019                      | From 1990 to 2019        |
|              |                  | Algeria                      | 85.7% (81.2–90.5%) | 3.4% (0 to 7.3%)      | 1503.92 (1242.73–1802.34) | -42.7% (-54.3 to -29.1%) |
|              |                  | Bahrain                      | 86.9% (82.9–90.8%) | 0.6% (-1.9 to 3.1%)   | 818.08 (689.8–989.92)     | -52.2% (-61 to -41.9%)   |
|              |                  | Egypt                        | 82% (76.6–87%)     | 40.3% (18.1 to 58%)   | 1755 (1315.04–2369.7)     | -9.2% (-30.9 to 17.3%)   |
|              |                  | Iran                         | 84.9% (80.8–89.7%) | 3.3% (1.5 to 5.9%)    | 1072.11 (972.56–1165.18)  | -43.9% (-49.4 to -35.4%) |
|              |                  | Iraq                         | 90.3% (87.5–93%)   | 3.3% (1.1 to 5.5%)    | 2640.29 (2134.66–3137.47) | -16.7% (-33.9 to 3.1%)   |
|              |                  | Jordan                       | 87.8% (83.9–92%)   | 1.1% (-1 to 3.6%)     | 1271.73 (1062.95–1477.14) | -49.7% (-58.3 to -40.2%) |
|              |                  | Kuwait                       | 88.6% (85.4–91.7%) | 1.3% (-0.4 to 3.1%)   | 831.04 (699.98–978.99)    | -10.5% (-23.2 to 4.5%)   |
|              |                  | Lebanon                      | 87.8% (83.7–92.1%) | 5.8% (2.9 to 9.1%)    | 660.81 (511.05–818.29)    | -29.8% (-45.1 to -11.7%) |
|              |                  | Libya                        | 86.3% (82.7–89.9%) | 13.8% (5.2 to 24%)    | 1355.5 (1061.21–1716.92)  | -10.5% (-29.5 to 16.2%)  |
|              |                  | Morocco                      | 88.4% (84.6–92.2%) | 3.8% (0.8 to 7.2%)    | 1995.78 (1606.38–2406.61) | -14.1% (-32 to 6.4%)     |
|              |                  | Palestine                    | 85.8% (81.3–91%)   | 1.7% (-1.1 to 5%)     | 1825.78 (1582.81–2103.26) | -31.4% (-45.6 to -13.5%) |
|              |                  | Oman                         | 85.4% (81.1–90.1%) | 9.1% (4.5 to 14.7%)   | 1610.32 (1402.57–1845.1)  | -33.1% (-48 to -12.1%)   |
|              |                  | Qatar                        | 86.5% (82.3–90.5%) | 0.7% (-1.9 to 3.6%)   | 782.5 (640.08–988.22)     | -44.3% (-57.4 to -28.6%) |
|              |                  | Saudi Arabia                 | 89.6% (86.4–92.5%) | 4.9% (2.6 to 7.5%)    | 1894.49 (1500.86–2229.97) | -25.6% (-44 to -0.7%)    |
|              |                  | Syrian Arab Republic         | 84.6% (80.9–88.2%) | 9.6% (4.1 to 15.5%)   | 1708.46 (1346.03–2186.72) | -34.5% (-51.5 to -11%)   |
|              |                  | Tunisia                      | 85.5% (80.9–90.5%) | 4.9% (1.5 to 8.5%)    | 1263.03 (963.03–1624.7)   | -21% (-41.6 to 5.3%)     |
|              |                  | Türkiye                      | 85.2% (81.4–89.1%) | 2.6% (-0.2 to 6%)     | 990.97 (816.26–1187.07)   | -21.6% (-42.2 to -2.1%)  |
|              |                  | United Arab Emirates         | 89.3% (85.6–92.7%) | 0.9% (-1.1 to 3%)     | 1719.55 (1350.25–2192.67) | -45.5% (-58.5 to -29.9%) |
|              |                  | Yemen                        | 86.4% (83.1–89.9%) | 2.0% (-2.0 to 6.9%)   | 2391.66 (1853.83–3075.25) | -23.1% (-40.5 to 1.9%)   |
|              |                  | Afghanistan                  | 89.6% (86.8–92.3%) | 2.3% (-0.4 to 5.1%)   | 3136.6 (2253.15–4043.73)  | -19.9% (-38.2 to -0.9%)  |
|              |                  | Sudan                        | 89.3% (86.2–92.2%) | 5.7% (1.4 to 13.8%)   | 2309.29 (1736.58–3195.82) | -29.3% (-43.2 to -11.8%) |
|              | Ischaemic stroke | Global                       | 85% (80.2–89.9%)   | 0.0% (-1.2 to 1.4%)   | 679.04 (611.57–747.17)    | -28.5% (-34.9 to -22.9%) |
|              |                  | North Africa and Middle East | 87.1% (82.8–92%)   | 5% (2.8 to 8.2%)      | 1030.95 (912.49–1161.56)  | -4.2% (-16.2 to 9%)      |
|              |                  | Algeria                      | 86% (80.3–92.4%)   | 3% (-0.1 to 6.8%)     | 1096.29 (899.86–1331.46)  | -22.4% (-37.7 to -4.6%)  |
|              |                  | Bahrain                      | 87% (81.6–92.8%)   | -0.6% (-3.1 to 1.9%)  | 533.72 (449.21–646.33)    | -44.2% (-53.9 to -33.1%) |
|              |                  | Egypt                        | 86.4% (81.7–90.8%) | 20.6% (10.7 to 33.3%) | 1194.45 (912.56–1589.29)  | 37.5% (1.1 to 75.1%)     |
|              |                  | Iran                         | 85.6% (80.7–91.4%) | 2.5% (0.8 to 5.3%)    | 842.34 (753.98–927.77)    | -41.4% (-46.9 to -32.8%) |
|              |                  | Iraq                         | 90.5% (86.7–94.5%) | 2.1% (0.2 to 4.2%)    | 1656.27 (1358.41–1936.06) | -5% (-24.2 to 16.5%)     |
|              |                  | Jordan                       | 87.7% (82.9–93%)   | 1% (-1.1 to 3.6%)     | 950.57 (792.13–1107.09)   | -45.8% (-55.8 to -35.6%) |
|              |                  | Kuwait                       | 88.9% (84.7–93.3%) | 0.2% (-1.5 to 1.9%)   | 574.01 (476.11–674.09)    | -11.8% (-24.1 to 2.7%)   |
|              |                  | Lebanon                      | 87.9% (83.2–93.6%) | 5.3% (2.3 to 8.8%)    | 525.76 (403.23–644.29)    | -10.6% (-31.2 to 10.5%)  |
|              |                  | Libya                        | 88.1% (83.9–92.8%) | 6.7% (2.5 to 12.3%)   | 989.04 (770.36–1273.62)   | 18.6% (-7.2 to 51.6%)    |
|              |                  | Morocco                      | 88.8% (84–93.8%)   | 3.2% (0.6 to 6.5%)    | 1424.11 (1149.72–1720.84) | 22.2% (-4.4 to 48.1%)    |
|              |                  | Palestine                    | 85.9% (80.3–92.7%) | 1.2% (-1.5 to 4.4%)   | 1366.28 (1171.78–1577.86) | -16.8% (-33.6 to 4.7%)   |

**Table S15** Burden of neurological conditions attributable to risk factors in North Africa and Middle East countries

| Risk factors | Causes                    | Locations                    | DALYs (95% UI)     |                        |                           |                          |
|--------------|---------------------------|------------------------------|--------------------|------------------------|---------------------------|--------------------------|
|              |                           |                              | PAF (%)            | PAF change (%)         | Rate per 100,000          | Rate change (%)          |
|              |                           |                              | 2019               | From 1990 to 2019      | 2019                      | From 1990 to 2019        |
|              |                           | Oman                         | 86.8% (81.3–92.9%) | 6.6% (2.7 to 11.1%)    | 1120.35 (948.02–1304.68)  | -13% (-31.3 to 15.5%)    |
|              |                           | Qatar                        | 86.4% (80.5–92.4%) | -0.7% (-3.3 to 1.9%)   | 498.82 (405.5–624.4)      | -35.9% (-50.1 to -20%)   |
|              |                           | Saudi Arabia                 | 89% (84.9–93.3%)   | 5% (2.2 to 8%)         | 1158.37 (900.61–1354.19)  | -13.3% (-33.9 to 12.6%)  |
|              |                           | Syrian Arab Republic         | 86.9% (81.6–92.9%) | 5% (1.3 to 10.1%)      | 929.55 (736.23–1168.72)   | -21.4% (-42.4 to 4%)     |
|              |                           | Tunisia                      | 85.3% (79.6–92.1%) | 3.9% (0.9 to 7.3%)     | 931 (709.53–1185.55)      | 8.1% (-19.9 to 40.9%)    |
|              |                           | Türkiye                      | 84.7% (79.3–90.7%) | 0.6% (-2 to 3.7%)      | 561.71 (464.88–674.12)    | -7.5% (-33.4 to 15.5%)   |
|              |                           | United Arab Emirates         | 89.3% (84.8–93.6%) | 0.3% (-1.6 to 2.2%)    | 1263.3 (996.8–1560.33)    | -33.7% (-48.9 to -15.3%) |
|              |                           | Yemen                        | 87% (82.8–91.6%)   | 1.9% (-1.8 to 5.9%)    | 1493.65 (1176.34–1906.38) | 22% (-3.7 to 56%)        |
|              |                           | Afghanistan                  | 89.7% (85.8–94%)   | 2.2% (-0.7 to 5.2%)    | 1673.01 (1224.87–2198.78) | 30.2% (1 to 63.5%)       |
|              |                           | Sudan                        | 90.4% (86.6–94.3%) | 4.7% (1.1 to 10.3%)    | 1530.35 (1174.12–2132.97) | 13.1% (-9 to 40.6%)      |
|              | Intracerebral haemorrhage | Global                       | 88.1% (85.1–90.5%) | 2% (0.6 to 3.7%)       | 733.56 (675.79–792)       | -35.4% (-42.5 to -29.1%) |
|              |                           | North Africa and Middle East | 84.5% (81.1–87.7%) | 8.9% (3.6 to 18.4%)    | 463.33 (401.03–535.18)    | -47.4% (-55.4 to -35.9%) |
|              |                           | Algeria                      | 85.3% (81.1–89%)   | 2.7% (-0.8 to 7.4%)    | 344.43 (270.1–433.66)     | -67.1% (-75.1 to -56.3%) |
|              |                           | Bahrain                      | 88.3% (84.1–91.7%) | -0.1% (-2.6 to 2.3%)   | 233.76 (190.52–290.21)    | -64.2% (-72.1 to -54.1%) |
|              |                           | Egypt                        | 76.3% (68.7–83.9%) | 34.3% (13.8 to 63.6%)  | 491.4 (342.95–709.93)     | -45.5% (-61.8 to -23.7%) |
|              |                           | Iran                         | 83.1% (79.4–86.6%) | 5.5% (2.5 to 10.7%)    | 185.43 (172.49–198.35)    | -51.1% (-58.3 to -42.4%) |
|              |                           | Iraq                         | 90.1% (87.1–92.6%) | 4% (1.1 to 7.7%)       | 921.56 (722.77–1159.29)   | -27.2% (-46 to -4.1%)    |
|              |                           | Jordan                       | 88.2% (84.5–91.5%) | 1.3% (-1 to 4%)        | 287.4 (236.39–341.93)     | -59.5% (-67.5 to -49.8%) |
|              |                           | Kuwait                       | 88.3% (84.9–91%)   | 2.1% (0.1 to 4.3%)     | 217.18 (176.93–260.49)    | -2.2% (-22.3 to 21.2%)   |
|              |                           | Lebanon                      | 87.2% (83.3–90.7%) | 5.1% (1.8 to 8.8%)     | 112.05 (83.72–151.37)     | -62.2% (-72.6 to -48.1%) |
|              |                           | Libya                        | 83.5% (79.1–88%)   | 11.8% (2.4 to 27.1%)   | 314.5 (234.5–432.18)      | -45.5% (-60 to -24.8%)   |
|              |                           | Morocco                      | 87.9% (83.9–91.4%) | 2.8% (-0.9 to 7.5%)    | 487.1 (373.93–621.39)     | -49.7% (-63.3 to -30.8%) |
|              |                           | Palestine                    | 85.8% (81.4–89.8%) | 2.5% (-0.8 to 6.2%)    | 418.18 (354.12–493.39)    | -55.6% (-66.1 to -41.5%) |
|              |                           | Oman                         | 84.3% (80–88.8%)   | 8.1% (3.2 to 14.7%)    | 425.07 (364–534.71)       | -56.6% (-67.6 to -40.3%) |
|              |                           | Qatar                        | 86.8% (82.5–90.6%) | 1.7% (-1.3 to 5%)      | 211.59 (166.85–276.7)     | -55.6% (-67.6 to -40.5%) |
|              |                           | Saudi Arabia                 | 90.5% (87.4–93.2%) | 4.8% (2.6 to 7.6%)     | 692.58 (537.92–846.19)    | -38.5% (-55.9 to -9.9%)  |
|              |                           | Syrian Arab Republic         | 85.8% (81.8–89.4%) | 6.9% (2.1 to 13.1%)    | 719.83 (547.65–944.57)    | -44.9% (-60.4 to -21.9%) |
|              |                           | Tunisia                      | 86.3% (82–90.1%)   | 5.3% (1.5 to 10.7%)    | 278.37 (204.86–370.4)     | -54.2% (-68.3 to -33.4%) |
|              |                           | Türkiye                      | 86.1% (82–89.9%)   | 4.6% (0.6 to 10.2%)    | 343.83 (276.19–421.9)     | -34.1% (-53.1 to -14.9%) |
|              |                           | United Arab Emirates         | 89.8% (86.5–92.8%) | 0.5% (-1.7 to 3.2%)    | 404.56 (285.22–600.65)    | -63.9% (-75.5 to -48.2%) |
|              |                           | Yemen                        | 86.1% (82.2–89.3%) | 1.1% (-2.8 to 7.3%)    | 762.31 (558.65–1017.91)   | -53.2% (-65.8 to -35.6%) |
|              |                           | Afghanistan                  | 90% (86.9–92.6%)   | 2.3% (-0.2 to 5%)      | 1257.48 (885.08–1689.78)  | -44.8% (-58.8 to -27.1%) |
|              |                           | Sudan                        | 87.8% (83.9–91%)   | 4% (-1 to 15.3%)       | 676.53 (461.03–950.98)    | -59.1% (-69.5 to -44.9%) |
|              | Subarachnoid haemorrhage  | Global                       | 83.6% (80.3–86.7%) | 1.9% (-0.1 to 4.3%)    | 114.12 (99.76–130.1)      | -53.3% (-60 to -36.1%)   |
|              |                           | North Africa and Middle East | 77.2% (72.5–81.8%) | 26.4% (10.7 to 56.8%)  | 72.67 (60.45–89.48)       | -53.1% (-66.3 to -27.2%) |
|              |                           | Algeria                      | 82.2% (77.6–86.3%) | 6.9% (0.5 to 16.5%)    | 63.2 (46.87–83.9)         | -62.2% (-73.8 to -41%)   |
|              |                           | Bahrain                      | 80.6% (76–85.1%)   | 17.5% (6.1 to 31.9%)   | 50.6 (38.49–71.74)        | -50.7% (-66.3 to -29.3%) |
|              |                           | Egypt                        | 60.4% (48.4–74.1%) | 84.3% (30.8 to 209.8%) | 69.16 (46.94–98.93)       | -57.6% (-74.8 to -23.6%) |
|              |                           | Iran                         | 81.2% (77.2–85.1%) | 4.4% (0.9 to 8.6%)     | 44.34 (38.81–51.33)       | -53.8% (-67.2 to -29.1%) |
|              |                           | Iraq                         | 86.6% (82.7–89.9%) | 7.4% (1.6 to 16%)      | 62.46 (46.4–85.76)        | -61.4% (-74.9 to -37.3%) |
|              |                           | Jordan                       | 86.8% (82.5–90.1%) | 2% (-0.6 to 5.1%)      | 33.76 (26.16–41.24)       | -48.8% (-63.1 to -26%)   |
|              |                           | Kuwait                       | 84.8% (81.4–87.8%) | 9.7% (4.8 to 16%)      | 39.85 (32.59–48.11)       | -28.6% (-43.1 to -4%)    |
|              |                           | Lebanon                      | 86.1% (82–89.8%)   | 11.2% (6 to 18%)       | 23 (16.1–31.94)           | -60.3% (-76.6 to -35.5%) |
|              |                           | Libya                        | 72.5% (63.5–81.3%) | 48.5% (12.4 to 104.4%) | 51.96 (36.84–75.47)       | -50.1% (-65.4 to -22.6%) |

**Table S15** Burden of neurological conditions attributable to risk factors in North Africa and Middle East countries

| Risk factors | Causes                                  | Locations                    | DALYs (95% UI)     |                        |                       |                          |
|--------------|-----------------------------------------|------------------------------|--------------------|------------------------|-----------------------|--------------------------|
|              |                                         |                              | PAF (%)            | PAF change (%)         | Rate per 100,000      | Rate change (%)          |
|              |                                         |                              | 2019               | From 1990 to 2019      | 2019                  | From 1990 to 2019        |
|              |                                         | Morocco                      | 84.3% (79.3–88.3%) | 8.3% (0.2 to 19.4%)    | 84.57 (59.57–123.32)  | -55.4% (-71.1 to -23.1%) |
|              |                                         | Palestine                    | 82.5% (77.4–86.5%) | 1.9% (-2.3 to 7.2%)    | 41.31 (34.29–49.38)   | -45% (-61.1 to -20%)     |
|              |                                         | Oman                         | 72.4% (64.4–80.9%) | 21.7% (5.6 to 46.8%)   | 64.9 (41.4–103.21)    | -54.1% (-72.2 to -13.7%) |
|              |                                         | Qatar                        | 86.2% (81.8–89.9%) | 4.5% (-0.5 to 10.5%)   | 72.09 (53.58–94.56)   | -52.2% (-71.5 to -22.9%) |
|              |                                         | Saudi Arabia                 | 88% (84.4–91%)     | 7.3% (2.6 to 12.9%)    | 43.55 (31.54–57.06)   | -49% (-70.8 to -15.5%)   |
|              |                                         | Syrian Arab Republic         | 54.1% (47–61.6%)   | 44% (13.4 to 88%)      | 59.09 (44.57–77.53)   | -50.4% (-67.7 to -20.4%) |
|              |                                         | Tunisia                      | 83.1% (78.3–87.1%) | 12% (3.8 to 24.3%)     | 53.66 (37.52–73.09)   | -58.3% (-74.7 to -29.1%) |
|              |                                         | Türkiye                      | 84.6% (80.8–88.2%) | 5.1% (1 to 10.6%)      | 85.42 (66.21–105.65)  | -36.8% (-60.3 to 10.3%)  |
|              |                                         | United Arab Emirates         | 84.9% (79.3–89.7%) | 12.2% (3 to 23.9%)     | 51.69 (27.03–84.26)   | -60% (-75.2 to -34.6%)   |
|              |                                         | Yemen                        | 82.4% (78–86.2%)   | 4.5% (-2.9 to 14.7%)   | 135.7 (70.19–225.17)  | -46.8% (-63.3 to -15%)   |
|              |                                         | Afghanistan                  | 87.8% (83.8–91%)   | 3.4% (-1 to 9.2%)      | 206.12 (67.38–351.92) | -41.9% (-59 to -10.3%)   |
|              |                                         | Sudan                        | 83.3% (76.9–87.8%) | 10.2% (-2 to 31.7%)    | 102.41 (58.58–172.78) | -60.4% (-74.3 to -25.9%) |
|              | Neurological disorders*                 | Global                       | 9.9% (4.6–18.6%)   | 7.4% (-1.2 to 14.6%)   | 122.4 (53.39–286.69)  | 6% (-2.4 to 13.6%)       |
|              |                                         | North Africa and Middle East | 11.2% (4.5–22.3%)  | 25.9% (13.4 to 41.8%)  | 152.62 (56.47–371.89) | 20.2% (7.5 to 39.9%)     |
|              |                                         | Algeria                      | 12.8% (5.1–25.4%)  | 28.5% (7.5 to 55.3%)   | 172.61 (63.35–427.52) | 16.1% (-2.1 to 40.5%)    |
|              |                                         | Bahrain                      | 14.8% (6.1–29.7%)  | 16.7% (-0.9 to 34.6%)  | 203.7 (76.08–504.82)  | 6.5% (-11.7 to 23.9%)    |
|              |                                         | Egypt                        | 11.5% (4.4–23.7%)  | 38% (15.3 to 68.5%)    | 150.75 (55.29–362.46) | 38.7% (15.7 to 70.7%)    |
|              |                                         | Iran                         | 10.1% (4.1–20%)    | 38.7% (20.5 to 61.9%)  | 138.81 (51.81–339.57) | 32% (14.6 to 63.3%)      |
|              |                                         | Iraq                         | 12.4% (4.7–25.1%)  | 9.6% (-6.7 to 28.5%)   | 163.14 (58.46–403.56) | 7.4% (-8.2 to 26.4%)     |
|              |                                         | Jordan                       | 14% (5.8–27.8%)    | 13.4% (-4.5 to 36%)    | 176.79 (68.74–424.32) | 7% (-9.1 to 30.7%)       |
|              |                                         | Kuwait                       | 14.9% (6.1–29.3%)  | 20.4% (1.5 to 44.4%)   | 189.09 (72.1–447.66)  | 14% (0.5 to 33.2%)       |
|              |                                         | Lebanon                      | 15% (6.1–29.4%)    | 26.2% (8.6 to 51%)     | 199.52 (79.55–466.17) | 21.3% (3.8 to 59.8%)     |
|              |                                         | Libya                        | 12.7% (4.9–25.1%)  | 18.3% (-1.4 to 42%)    | 173.85 (59.87–433.96) | 14.4% (-5.7 to 42.5%)    |
|              |                                         | Morocco                      | 9.8% (3.7–20.3%)   | 23.2% (0.9 to 46.4%)   | 131.42 (44.78–341.52) | 25.7% (2.6 to 49.4%)     |
|              |                                         | Palestine                    | 10.8% (4.1–21.9%)  | 23.4% (2 to 48.4%)     | 146.9 (53.91–374.07)  | 16.2% (-6.5 to 45.9%)    |
|              |                                         | Oman                         | 11.6% (4.5–23.9%)  | 52.2% (22.9 to 102.9%) | 155.21 (52.46–394.55) | 53.4% (23 to 113.9%)     |
|              |                                         | Qatar                        | 15.8% (6.2–31.4%)  | 38.9% (12.1 to 81.2%)  | 213.66 (75.8–551.92)  | 36.4% (7.6 to 77.8%)     |
|              |                                         | Saudi Arabia                 | 11.8% (4.7–24%)    | 38.4% (14.1 to 77.5%)  | 167.38 (58.6–412.97)  | 38.4% (14.4 to 83.8%)    |
|              |                                         | Syrian Arab Republic         | 12.2% (4.5–24.2%)  | 10.8% (-7.5 to 34.9%)  | 159.06 (58.66–401.98) | 12.5% (-10 to 45.8%)     |
|              |                                         | Tunisia                      | 13.1% (5.4–25.1%)  | 19.7% (2 to 43.6%)     | 171.43 (64.49–400.5)  | 16.4% (-6.5 to 49.7%)    |
|              |                                         | Türkiye                      | 11.5% (4.9–21.8%)  | 19.9% (1.8 to 44.3%)   | 168.09 (67.41–395.1)  | 8.2% (-9.4 to 31.7%)     |
|              |                                         | United Arab Emirates         | 12.8% (5.2–25.7%)  | 19.9% (-2.2 to 44.1%)  | 183.12 (70.89–453.03) | 11.9% (-10 to 39.7%)     |
|              |                                         | Yemen                        | 8.9% (3.5–18.2%)   | 25.1% (5.3 to 45.1%)   | 117.04 (42.38–300.14) | 22% (-0.4 to 47.3%)      |
|              |                                         | Afghanistan                  | 8.8% (3.2–19.1%)   | 64% (37.7 to 108.2%)   | 133.17 (42.1–359.27)  | 46.6% (23.8 to 77.7%)    |
|              |                                         | Sudan                        | 9.8% (3.7–20.4%)   | 44.9% (19.3 to 77.1%)  | 130.99 (45.23–336.84) | 33.8% (11.8 to 63.7%)    |
|              | Alzheimer's disease and other dementias | Global                       | 32.8% (21.8–45.8%) | 3% (-5.5 to 9.6%)      | 111.34 (43.2–273.86)  | 6.9% (-2.2 to 15.2%)     |
|              |                                         | North Africa and Middle East | 39.9% (26.4–54.7%) | 20.3% (9.2 to 30.5%)   | 154.71 (58.76–375.07) | 19% (6.7 to 37.7%)       |
|              |                                         | Algeria                      | 43.4% (29.2–58.9%) | 18% (3.9 to 31.5%)     | 174.4 (65.84–428.68)  | 12.1% (-6 to 34.5%)      |
|              |                                         | Bahrain                      | 50.2% (33–68%)     | 15.8% (3.3 to 26.2%)   | 202.75 (75.42–507.7)  | 11.4% (-5.5 to 29.4%)    |
|              |                                         | Egypt                        | 43.8% (30.4–57.3%) | 38.8% (24 to 57.4%)    | 158.75 (63.21–371.78) | 39% (15.6 to 70.9%)      |
|              |                                         | Iran                         | 35.8% (22.9–50.6%) | 28.9% (12.4 to 43.7%)  | 138.31 (51.75–336.34) | 28.7% (11.3 to 59.1%)    |
|              |                                         | Iraq                         | 44.5% (30–60.4%)   | 7.3% (-3.4 to 18.2%)   | 170.21 (64.71–412.34) | 9.4% (-7 to 27.8%)       |
|              |                                         | Jordan                       | 48.9% (34.6–63.6%) | 8.3% (-2.2 to 18.3%)   | 181.02 (73.93–425.61) | 3.5% (-11.6 to 22.9%)    |
|              |                                         | Kuwait                       | 49.7% (33.6–65.4%) | 14.3% (3.7 to 25.5%)   | 192.73 (76.14–449.12) | 11.4% (-1.6 to 27.8%)    |
|              |                                         | Lebanon                      | 51.1% (36.7–64.9%) | 26.9% (15.7 to 40.4%)  | 202.05 (81.67–468.22) | 23.8% (6.5 to 66.9%)     |
|              |                                         | Libya                        | 42.6% (27.4–58.9%) | 16.8% (3.3 to 28.1%)   | 176.96 (63.31–436.27) | 11.9% (-7.7 to 38.5%)    |
|              |                                         | Morocco                      | 34.4% (20.9–49.7%) | 26.2% (7.9 to 44.9%)   | 133.04 (45.82–340.7)  | 26.7% (3.7 to 50.4%)     |
|              |                                         | Palestine                    | 38% (23.8–53.4%)   | 17.9% (1.7 to 34.2%)   | 147.89 (54.98–374.49) | 12.7% (-9.4 to 42%)      |
|              |                                         | Oman                         | 37.2% (22.8–53.8%) | 56.2% (31.2 to 93.9%)  | 157.32 (55.53–397.26) | 51.2% (21.2 to 108.3%)   |
|              |                                         | Qatar                        | 53.5% (34.4–71.6%) | 32.6% (11.1 to 62.6%)  | 218.04 (82.09–556.08) | 37% (7.5 to 77.7%)       |

**Table S15** Burden of neurological conditions attributable to risk factors in North Africa and Middle East countries

| Risk factors | Causes              | Locations                    | DALYs (95% UI)       |                          |                       |                          |
|--------------|---------------------|------------------------------|----------------------|--------------------------|-----------------------|--------------------------|
|              |                     |                              | PAF (%)              | PAF change (%)           | Rate per 100,000      | Rate change (%)          |
|              |                     |                              | 2019                 | From 1990 to 2019        | 2019                  | From 1990 to 2019        |
|              |                     | Saudi Arabia                 | 43.8% (27.4–61.3%)   | 42.2% (28.3 to 66.7%)    | 170.84 (62.31–417.87) | 39.2% (14.9 to 86%)      |
|              |                     | Syrian Arab Republic         | 42% (27.9–57%)       | 8.4% (-4.2 to 20%)       | 164.29 (63.23–409.64) | 11.6% (-10.6 to 43.4%)   |
|              |                     | Tunisia                      | 42.5% (28.3–57.8%)   | 16.3% (1.1 to 28.3%)     | 170.12 (63.54–397.23) | 13.8% (-8.3 to 44.9%)    |
|              |                     | Türkiye                      | 41.2% (26.8–56.1%)   | 7.1% (-5.6 to 17.6%)     | 163.27 (63.04–389.57) | 4.9% (-12 to 25%)        |
|              |                     | United Arab Emirates         | 49.4% (32.3–66.4%)   | 29.4% (16.5 to 49.1%)    | 181.29 (68.34–451.55) | 22.5% (2.5 to 52.5%)     |
|              |                     | Yemen                        | 31.5% (21.1–43%)     | 26.1% (10.2 to 41.8%)    | 121.09 (45.36–304.77) | 25.6% (4.2 to 50.6%)     |
|              |                     | Afghanistan                  | 31.3% (18.4–46.8%)   | 49.7% (34 to 73.8%)      | 135.85 (44.79–362.37) | 44% (21.6 to 72.4%)      |
|              |                     | Sudan                        | 37.4% (24.3–52.1%)   | 40.7% (20.2 to 64.1%)    | 137.19 (51.62–344.06) | 35.1% (13.8 to 62%)      |
|              | Parkinson's disease | Global                       | -10% (-15.1–-5.2%)   | -22.2% (-27.5 to -17.1%) | -8.02 (-12.33–-4.11)  | -20.4% (-27.9 to -12.9%) |
|              |                     | North Africa and Middle East | -9.1% (-13.4–-4.8%)  | -19.7% (-30 to -9.3%)    | -7.65 (-11.54–-4.01)  | -19% (-31.8 to -1.7%)    |
|              |                     | Algeria                      | -9.1% (-13.6–-4.9%)  | -24.4% (-39.5 to -8.4%)  | -7.22 (-11.49–-3.66)  | -38% (-55.3 to -14.6%)   |
|              |                     | Bahrain                      | -8.2% (-12.5–-4.4%)  | -28.7% (-46.2 to -5.5%)  | -7.31 (-11.81–-3.64)  | -38.3% (-57.6 to -11.6%) |
|              |                     | Egypt                        | -10.7% (-16.1–-5.5%) | 21.8% (-1.9 to 50.1%)    | -10.55 (-17.15–-5.12) | 36.2% (0.6 to 80.7%)     |
|              |                     | Iran                         | -6.4% (-9.8–-3.2%)   | -23.3% (-37.6 to -7.8%)  | -4.95 (-7.59–-2.39)   | -20.8% (-40.1 to 4.9%)   |
|              |                     | Iraq                         | -13% (-19.8–-7%)     | -22% (-38.2 to -5%)      | -11.14 (-17.84–-5.86) | -8.6% (-34.3 to 25.6%)   |
|              |                     | Jordan                       | -13% (-19.7–-6.5%)   | -27.2% (-42.1 to -7.9%)  | -9.66 (-15.35–-4.7)   | -37.1% (-54.1 to -17.7%) |
|              |                     | Kuwait                       | -10.5% (-15.4–-5.8%) | -10.8% (-30.1 to 12.8%)  | -5.92 (-9.05–-3.05)   | -34.7% (-51.7 to -13.6%) |
|              |                     | Lebanon                      | -17% (-25.5–-9%)     | 26.7% (0.5 to 57.3%)     | -11.82 (-19.08–-6.02) | 8.8% (-22.7 to 55.2%)    |
|              |                     | Libya                        | -8.3% (-12.4–-4.4%)  | -25.8% (-40.3 to -8.2%)  | -7.03 (-11.29–-3.48)  | -17.9% (-41.6 to 19.3%)  |
|              |                     | Morocco                      | -5.2% (-8–-2.6%)     | -34.1% (-46.6 to -17.7%) | -5 (-7.8–-2.41)       | -7.9% (-33.3 to 24.8%)   |
|              |                     | Palestine                    | -10.9% (-16.1–-5.7%) | -17.4% (-37.6 to 6.4%)   | -10.11 (-15.79–-4.83) | -21.6% (-45.4 to 21.8%)  |
|              |                     | Oman                         | -3.9% (-5.9–-2.1%)   | -30.7% (-48.5 to -6.5%)  | -4.9 (-7.63–-2.26)    | -9.3% (-41.2 to 40%)     |
|              |                     | Qatar                        | -6.2% (-9.4–-3.2%)   | -11.5% (-34.2 to 15.1%)  | -9.14 (-15.26–-4.55)  | 1.3% (-32.7 to 50.8%)    |
|              |                     | Saudi Arabia                 | -5.9% (-8.8–-3.2%)   | 6.3% (-23.4 to 41.6%)    | -6.55 (-10.08–-3.22)  | 7.7% (-29.9 to 74.6%)    |
|              |                     | Syrian Arab Republic         | -10.1% (-15.7–-5.2%) | -32% (-46.8 to -16%)     | -8.51 (-13.98–-3.93)  | -22.7% (-45.7 to 10%)    |
|              |                     | Tunisia                      | -12.1% (-18.6–-6.1%) | -21.5% (-37.9 to -2.7%)  | -8.79 (-14.38–-4.17)  | -12.8% (-38.8 to 22.4%)  |
|              |                     | Türkiye                      | -10.9% (-16.6–-5.3%) | -36.7% (-49.7 to -22.7%) | -8.21 (-13.68–-4.03)  | -41.9% (-57.4 to -21.5%) |
|              |                     | United Arab Emirates         | -7.3% (-11.3–-3.7%)  | 13.5% (-13.9 to 47.3%)   | -9.45 (-15.95–-4.54)  | 1.8% (-31.8 to 50.1%)    |
|              |                     | Yemen                        | -10.8% (-15.6–-5.9%) | -7.1% (-25.1 to 18.1%)   | -8.27 (-12.97–-4.37)  | 7.2% (-23.8 to 55.5%)    |
|              |                     | Afghanistan                  | -4.4% (-6.9–-2.3%)   | 21.8% (-7.4 to 53.8%)    | -5.04 (-8.04–-2.55)   | 14.4% (-18.8 to 57.9%)   |
|              |                     | Sudan                        | -8.8% (-13.2–-4.8%)  | -11% (-33.9 to 16.9%)    | -7.55 (-12.17–-3.96)  | -15% (-41.1 to 31.7%)    |
|              | Idiopathic epilepsy | Global                       | 10.1% (7.3–13%)      | 11.2% (-2.6 to 23.8%)    | 17.16 (11.54–23.99)   | -7% (-16.7 to 3.9%)      |
|              |                     | North Africa and Middle East | 2.1% (1.4–3.1%)      | 11.8% (-16 to 45.8%)     | 3.4 (1.88–5.53)       | -17% (-44.5 to 21.7%)    |
|              |                     | Algeria                      | 2.5% (1.4–3.6%)      | 103.9% (47.9 to 201.7%)  | 3.57 (1.45–6.69)      | 25.7% (-45 to 174.2%)    |
|              |                     | Bahrain                      | 3.7% (2.4–5.6%)      | -48.2% (-62.9 to -34%)   | 6.94 (2.89–12.81)     | -64.8% (-85.2 to -20%)   |
|              |                     | Egypt                        | 1% (0.4–1.7%)        | 21.1% (-31.8 to 123.7%)  | 1.05 (0.32–2.4)       | -3.5% (-66.4 to 165%)    |
|              |                     | Iran                         | 1.8% (1.2–2.6%)      | 367.8% (206.3 to 790.7%) | 2.54 (1.48–4.02)      | 204.6% (90.2 to 478.2%)  |
|              |                     | Iraq                         | 1.8% (0.9–2.9%)      | -48.6% (-71.1 to -21.2%) | 2.34 (0.8–4.95)       | -64.2% (-86.1 to -18.8%) |
|              |                     | Jordan                       | 2% (1–3.3%)          | 36.3% (-17.3 to 139.4%)  | 2.43 (0.81–5.22)      | 6.3% (-60.5 to 176.6%)   |
|              |                     | Kuwait                       | 0.3% (0–0.6%)        |                          | 0.35 (0.04–1.02)      |                          |
|              |                     | Lebanon                      | 3.3% (2–4.8%)        | -34.3% (-54.8 to -12.5%) | 4.27 (1.85–8.28)      | -51.4% (-78.9 to 2.9%)   |
|              |                     | Libya                        | 1.1% (0.3–1.7%)      | 353.6% (27.6 to 721.5%)  | 1.58 (0.46–2.86)      | 218% (-16.4 to 732.1%)   |
|              |                     | Morocco                      | 1.5% (0.8–2.4%)      | -33.3% (-55.5 to -8.5%)  | 2.02 (0.62–4.57)      | -41.1% (-80.8 to 45.7%)  |
|              |                     | Palestine                    | 4.1% (2.6–6%)        | 55.8% (16.1 to 143.6%)   | 6.58 (3.52–11.23)     | 17.3% (-39.2 to 139.2%)  |
|              |                     | Oman                         | 1.4% (0.6–2.3%)      | 40.5% (-3.6 to 121.4%)   | 1.45 (0.39–3.28)      | 26.3% (-57.8 to 272.4%)  |
|              |                     | Qatar                        | 2.5% (1.4–3.8%)      | -16.9% (-38.9 to 9.4%)   | 3.12 (0.98–6.66)      | -40.8% (-79.2 to 69.9%)  |
|              |                     | Saudi Arabia                 | 0.9% (0.2–1.9%)      | -42.2% (-67 to -18.2%)   | 2.04 (0.31–4.94)      | -43.1% (-78.4 to 26.9%)  |
|              |                     | Syrian Arab Republic         | 1.5% (0.8–2.3%)      | -42% (-60.2 to -22.7%)   | 1.57 (0.65–2.92)      | -52.2% (-79.7 to 11%)    |
|              |                     | Tunisia                      | 6.5% (4.3–9%)        | 89.8% (45.9 to 153.5%)   | 7.65 (3.66–14.02)     | 37.5% (-33.7 to 202.8%)  |



**Table S15** Burden of neurological conditions attributable to risk factors in North Africa and Middle East countries

| Risk factors                   | Causes             | Locations                    | DALYs (95% UI)     |                          |                    |                          |
|--------------------------------|--------------------|------------------------------|--------------------|--------------------------|--------------------|--------------------------|
|                                |                    |                              | PAF (%)            | PAF change (%)           | Rate per 100,000   | Rate change (%)          |
|                                |                    |                              | 2019               | From 1990 to 2019        | 2019               | From 1990 to 2019        |
|                                |                    | Türkiye                      | 4.6% (2.9–6.4%)    | 45% (5.9 to 110.1%)      | 9.8 (4.23–18.05)   | 1.5% (-52.2 to 125.2%)   |
|                                |                    | United Arab Emirates         | 4.2% (2.3–6.5%)    | -44.3% (-66.7 to -22.4%) | 8.98 (3.52–17.33)  | -60.4% (-84 to -12.8%)   |
|                                |                    | Yemen                        | 1.5% (0.9–2.3%)    | -45.2% (-65.5 to -21.1%) | 2.23 (0.97–4.09)   | -60.1% (-81.7 to -15.8%) |
|                                |                    | Afghanistan                  | 0.3% (0.1–0.6%)    |                          | 0.7 (0.21–1.49)    |                          |
|                                |                    | Sudan                        | 0.1% (0.0–0.2%)    | -94.4% (-98.2 to -88.1%) | 0.15 (0.04–0.39)   | -96.3% (-99 to -91.1%)   |
|                                | Multiple sclerosis | Global                       | 13.7% (10.4–17.2%) | -25.6% (-30.1 to -19%)   | 1.92 (1.41–2.54)   | -35.4% (-41.4 to -28.2%) |
|                                |                    | North Africa and Middle East | 10.8% (7.8–14.5%)  | -12% (-28.2 to 5%)       | 2.15 (1.51–2.96)   | -6.7% (-28.5 to 8.8%)    |
|                                |                    | Algeria                      | 9.3% (6.6–12.1%)   | -13% (-31.7 to 11.3%)    | 1.86 (1.19–2.65)   | -1.8% (-30.6 to 27.5%)   |
|                                |                    | Bahrain                      | 10.7% (7.7–13.9%)  | -15.3% (-28 to -1.2%)    | 1.33 (0.85–1.95)   | -4.7% (-30 to 22.4%)     |
|                                |                    | Egypt                        | 10.3% (3.6–17.8%)  | 24.9% (-45.6 to 145.4%)  | 1.51 (0.82–3.25)   | 30.4% (-7 to 67.5%)      |
|                                |                    | Iran                         | 9.8% (7.2–13.5%)   | -6.6% (-22.4 to 14.2%)   | 2.89 (1.89–4.69)   | -6.3% (-34.1 to 15%)     |
|                                |                    | Iraq                         | 12.1% (8.9–16.1%)  | -18.9% (-32.4 to -2.3%)  | 1.74 (1.13–2.56)   | -8.9% (-32.6 to 16.9%)   |
|                                |                    | Jordan                       | 15.8% (12.1–19.5%) | -3.2% (-18.5 to 16.1%)   | 3 (2.02–4.11)      | -9.9% (-29.5 to 16.2%)   |
|                                |                    | Kuwait                       | 11.2% (7.8–14.7%)  | -25.4% (-36.7 to -11.7%) | 1.94 (1.24–2.79)   | 3% (-15.4 to 26%)        |
|                                |                    | Lebanon                      | 21.4% (16.2–26.9%) | 21.7% (4.7 to 41.8%)     | 5.02 (3.35–7)      | 47% (13.9 to 92.5%)      |
|                                |                    | Libya                        | 10.8% (7.3–14.3%)  | -9.5% (-31.6 to 13.1%)   | 2.34 (1.48–3.23)   | 20.7% (-13.8 to 67%)     |
|                                |                    | Morocco                      | 6.8% (4.9–8.8%)    | -27.9% (-40.8 to -9.7%)  | 1.36 (0.87–1.89)   | -9.9% (-36.8 to 23.1%)   |
|                                |                    | Palestine                    | 13% (9.6–17.7%)    | -5.3% (-24.9 to 23.5%)   | 2.54 (1.64–3.81)   | 2.9% (-34.2 to 43%)      |
|                                |                    | Oman                         | 7.9% (5.6–10.6%)   | -16.9% (-35.2 to 7.2%)   | 1.34 (0.82–1.93)   | -0.3% (-40 to 37.9%)     |
|                                |                    | Qatar                        | 9.8% (7–12.7%)     | 0.7% (-16.8 to 21.9%)    | 1.64 (1.03–2.38)   | 34.6% (-2.4 to 80.1%)    |
|                                |                    | Saudi Arabia                 | 8.9% (6.4–11.9%)   | 27.3% (1.9 to 61.3%)     | 1.04 (0.66–1.52)   | 56.6% (9.9 to 129.6%)    |
|                                |                    | Syrian Arab Republic         | 11.4% (8.4–14.4%)  | -19.7% (-34.7 to -3.7%)  | 1.72 (1.15–2.47)   | -7.3% (-31.4 to 18.8%)   |
|                                |                    | Tunisia                      | 11.1% (8.1–14.1%)  | -11.3% (-26.6 to 11.1%)  | 2.46 (1.6–3.44)    | 11.5% (-15.6 to 43.6%)   |
|                                |                    | Türkiye                      | 15.5% (10.5–19.8%) | -14.4% (-35.8 to 19.7%)  | 3.24 (2.26–4.44)   | -24.4% (-44.7 to -3.9%)  |
|                                |                    | United Arab Emirates         | 11.2% (7.7–15.2%)  | -9.7% (-27.1 to 9.9%)    | 2.31 (1.23–3.95)   | 7.7% (-31.6 to 58.1%)    |
|                                |                    | Yemen                        | 14.3% (10.2–18.6%) | -7.4% (-23.3 to 13.2%)   | 1.99 (1.25–2.86)   | 16.6% (-22.8 to 68%)     |
|                                |                    | Afghanistan                  | 6.2% (3.9–9.2%)    | 62.7% (27.1 to 111.4%)   | 1.66 (0.95–2.79)   | 81.4% (26.4 to 153.6%)   |
|                                |                    | Sudan                        | 8.6% (5.6–12%)     | -12.1% (-31.4 to 18%)    | 1.2 (0.68–1.86)    | 5.8% (-31.7 to 50.8%)    |
| <b>Cluster of risk factors</b> |                    |                              |                    |                          |                    |                          |
| Behavioural risk factors‡      | Meningitis         | Global                       | 6.4% (5.7–7.3%)    | 13.4% (-1.6 to 30.6%)    | 14.9 (11.92–19.23) | -51.4% (-61 to -38.4%)   |
|                                |                    | North Africa and Middle East | 6.8% (5.2–9%)      | -10.3% (-35.5 to 22.9%)  | 4.79 (3.37–6.71)   | -78.3% (-85.5 to -67.4%) |
|                                |                    | Algeria                      | 4% (2.4–6.3%)      | -8.9% (-52.2 to 78.3%)   | 1.62 (0.91–2.7)    | -81.7% (-91.1 to -62.8%) |
|                                |                    | Bahrain                      | 1.7% (1.2–2.4%)    | -53.4% (-73.4 to -20%)   | 0.32 (0.21–0.46)   | -88.1% (-93.5 to -78.8%) |
|                                |                    | Egypt                        | 9.2% (4.5–16%)     | -33.7% (-69.4 to 32.3%)  | 5 (2.09–9.57)      | -83.7% (-93.7 to -65.1%) |
|                                |                    | Iran                         | 4.3% (3.2–5.3%)    | -34% (-51.9 to -11.9%)   | 1.64 (1.17–2.18)   | -86.3% (-91.5 to -79.3%) |
|                                |                    | Iraq                         | 8.3% (5.3–12%)     | -16.7% (-55.7 to 49.2%)  | 5.59 (3.35–8.89)   | -83.3% (-91.6 to -67%)   |
|                                |                    | Jordan                       | 5.7% (3.4–9.4%)    | -11.6% (-54.7 to 86.4%)  | 3.03 (1.68–5.48)   | -61.5% (-83.1 to -10.9%) |
|                                |                    | Kuwait                       | 5.9% (3.8–8.3%)    | 3.1% (-32.5 to 51.3%)    | 1.19 (0.65–1.78)   | -61.8% (-77.6 to -40.2%) |
|                                |                    | Lebanon                      | 3.2% (1.6–5.4%)    | -53.6% (-79.5 to -3.9%)  | 0.93 (0.43–1.64)   | -85.4% (-93.8 to -68.6%) |
|                                |                    | Libya                        | 2.4% (1.4–4%)      | -66.2% (-82.6 to -33.8%) | 0.85 (0.48–1.48)   | -89.8% (-95 to -80.2%)   |
|                                |                    | Morocco                      | 9.8% (5.3–16.6%)   | -27.1% (-66.3 to 54%)    | 6.76 (3.12–12.68)  | -86.8% (-94.8 to -67.4%) |
|                                |                    | Palestine                    | 3.9% (2.5–5.7%)    | -29.4% (-62.3 to 31.1%)  | 1.58 (0.97–2.42)   | -87.6% (-93.8 to -75.6%) |
|                                |                    | Oman                         | 4.1% (2.2–7%)      | -35% (-65.8 to 26.9%)    | 1 (0.53–1.87)      | -83% (-91.4 to -64%)     |
|                                |                    | Qatar                        | 3.3% (2.1–5%)      | -43.6% (-69.4 to 1.8%)   | 0.83 (0.53–1.28)   | -84.8% (-92.5 to -70.8%) |
|                                |                    | Saudi Arabia                 | 0.4% (0.2–0.7%)    | -63.5% (-84.3 to -24.5%) | 0.12 (0.06–0.19)   | -90.2% (-95.5 to -80.2%) |
|                                |                    | Syrian Arab Republic         | 2.6% (1.4–4.3%)    | -53.1% (-78.4 to 2.5%)   | 2.56 (1.37–4.42)   | -86.2% (-93.6 to -68.9%) |
|                                |                    | Tunisia                      | 5.9% (3.5–9.3%)    | -6.6% (-51.7 to 84%)     | 2.24 (1.22–3.71)   | -78.6% (-90 to -55.1%)   |
|                                |                    | Türkiye                      | 2% (1.3–3.2%)      | -36.6% (-66.6 to 20.3%)  | 0.51 (0.31–0.85)   | -93.5% (-96.9 to -86.5%) |
|                                |                    | United Arab Emirates         | 1.4% (0.7–3.4%)    | -72.2% (-86.8 to -45.4%) | 0.43 (0.21–1.08)   | -92.9% (-96.5 to -85.7%) |
|                                |                    | Yemen                        | 5.1% (2.9–8.3%)    | -10.6% (-55.6 to 76.3%)  | 4.96 (2.71–8.63)   | -71.9% (-86.4 to -43.6%) |



**Table S15** Burden of neurological conditions attributable to risk factors in North Africa and Middle East countries

| Risk factors | Causes               | Locations                    | DALYs (95% UI)          |                          |                          |                          |
|--------------|----------------------|------------------------------|-------------------------|--------------------------|--------------------------|--------------------------|
|              |                      |                              | PAF (%)                 | PAF change (%)           | Rate per 100,000         | Rate change (%)          |
|              |                      |                              | 2019                    | From 1990 to 2019        | 2019                     | From 1990 to 2019        |
| Encephalitis |                      | Afghanistan                  | 5.9% (3–10.4%)          | -7.1% (-56.6 to 110.5%)  | 14.31 (7.06–25.73)       | -75.4% (-89 to -43.5%)   |
|              |                      | Sudan                        | 5% (2.8–8.3%)           | -9.1% (-50.3 to 65.6%)   | 4.99 (2.59–9.08)         | -86.4% (-93 to -75%)     |
|              |                      | Global                       | 2.3% (1.8–2.8%)         | 43.9% (3 to 92.7%)       | 1.53 (1.18–1.96)         | -34.1% (-55.6 to 2%)     |
|              |                      | North Africa and Middle East | 3.7% (2.1–5.9%)         | 8.8% (-31.6 to 74.9%)    | 1.52 (0.9–2.5)           | -14.5% (-51.5 to 51.4%)  |
|              |                      | Algeria                      | 2.3% (1.1–4.3%)         | 23.3% (-45.4 to 180.2%)  | 0.44 (0.23–0.78)         | -12.2% (-64.5 to 112.1%) |
|              |                      | Bahrain                      | 1% (0.6–1.6%)           | -32.3% (-66.3 to 33.2%)  | 0.11 (0.06–0.2)          | -49.5% (-77.1 to 2%)     |
|              |                      | Egypt                        | 6.6% (2.2–13.4%)        | 4.9% (-55 to 124.7%)     | 4.29 (0.77–9.74)         | -28.8% (-72.2 to 63.4%)  |
|              |                      | Iran                         | 3.5% (1.4–4.8%)         | 7.6% (-25.3 to 43.9%)    | 0.58 (0.2–0.84)          | -15.2% (-53.5 to 28.8%)  |
|              |                      | Iraq                         | 3.3% (1.6–5.7%)         | 10.3% (-48 to 140.9%)    | 2.33 (0.89–4.39)         | -26.6% (-68.7 to 74.7%)  |
|              |                      | Jordan                       | 1.5% (0.8–2.5%)         | -32.2% (-72.1 to 35.6%)  | 0.16 (0.08–0.28)         | -73.5% (-90.7 to -6.1%)  |
|              |                      | Kuwait                       | 2.2% (1.5–3%)           | 20.6% (-20.3 to 92.8%)   | 0.23 (0.15–0.33)         | -11.2% (-44.5 to 47.3%)  |
|              |                      | Lebanon                      | 2.6% (1.3–4.8%)         | -3.6% (-60.4 to 139.5%)  | 0.43 (0.19–0.85)         | -21.1% (-70.3 to 98.9%)  |
|              |                      | Libya                        | 2.5% (1.1–4.6%)         | -19.8% (-68.5 to 87.3%)  | 0.4 (0.21–0.72)          | -27.6% (-73.3 to 77.2%)  |
|              |                      | Morocco                      | 5.4% (2–10.4%)          | -2.7% (-52.5 to 103.2%)  | 1.3 (0.62–2.44)          | -19.3% (-65.2 to 84.1%)  |
|              |                      | Palestine                    | 1.9% (1.1–3.2%)         | -10.2% (-58.5 to 101.8%) | 0.31 (0.17–0.52)         | -29.3% (-69.2 to 56.7%)  |
|              |                      | Oman                         | 1.9% (1.3–6%)           | 2.7% (-55.6 to 153.6%)   | 2.36 (1.12–4.28)         | -42.6% (-76.3 to 39.3%)  |
|              |                      | Qatar                        | 1.5% (0.8–2.4%)         | -16.9% (-62.2 to 86.7%)  | 0.2 (0.1–0.36)           | -41.1% (-76.5 to 32.8%)  |
|              |                      | Saudi Arabia                 | 0.5% (0.1–1.7%)         | 1.5% (-71.8 to 128.7%)   | 0.14 (0.04–0.57)         | -48.4% (-87.3 to 10.2%)  |
|              |                      | Syrian Arab Republic         | 1.5% (0.9–2.2%)         | -24.1% (-61.5 to 37.8%)  | 0.4 (0.23–0.69)          | -55% (-79.3 to -7.4%)    |
|              |                      | Tunisia                      | 2.7% (1.3–5%)           | 4.1% (-55.7 to 158.3%)   | 0.46 (0.24–0.84)         | -26.6% (-72.3 to 80.1%)  |
|              | Türkiye              | 0.9% (0.4–2%)                | -19.9% (-66.5 to 67.6%) | 0.17 (0.08–0.35)         | -57.9% (-83.7 to -4.3%)  |                          |
|              | United Arab Emirates | 2.1% (1.3–9%)                | -17.9% (-67.6 to 98.6%) | 0.37 (0.16–0.69)         | -34.6% (-75.4 to 68.7%)  |                          |
|              | Yemen                | 2.3% (1.1–4.5%)              | 5% (-55.4 to 167.7%)    | 0.67 (0.34–1.25)         | -2.1% (-57.5 to 138.7%)  |                          |
|              | Afghanistan          | 1.1% (0.5–2.3%)              | 6.7% (-56.6 to 155.4%)  | 2.07 (0.84–5.18)         | -9.4% (-62.7 to 119.3%)  |                          |
|              | Sudan                | 2% (1.3–9%)                  | 3.8% (-56.7 to 169.7%)  | 0.61 (0.33–1.04)         | -20.4% (-66.6 to 104.2%) |                          |
| Stroke       |                      | Global                       | 46.6% (40.5–53.5%)      | -5.4% (-8.4 to -2.6%)    | 823.57 (707.33–963.08)   | -38.7% (-44.6 to -33.2%) |
|              |                      | North Africa and Middle East | 34% (29.6–38.9%)        | 1.3% (-4.8 to 7.5%)      | 621.84 (517.96–746.83)   | -31.1% (-39.8 to -19.7%) |
|              | Algeria              | 34.1% (28.8–39.9%)           | -8.7% (-16.6 to -0.7%)  | 598.22 (464.26–757.41)   | -49.4% (-60 to -35.9%)   |                          |
|              | Bahrain              | 29.8% (24.9–35.6%)           | -13.7% (-22 to -6.1%)   | 280.11 (215.71–361.94)   | -59% (-67.5 to -49.6%)   |                          |
|              | Egypt                | 29.2% (24.5–35%)             | 37.5% (13.1 to 58.5%)   | 626.69 (445.48–906.17)   | -10.9% (-32.9 to 16.4%)  |                          |
|              | Iran                 | 31.2% (26.4–36.7%)           | -10.8% (-16 to -5.7%)   | 394.44 (327.43–474.93)   | -51.6% (-57.7 to -44.3%) |                          |
|              | Iraq                 | 38.4% (33.2–43.8%)           | -2.7% (-9.4 to 4.3%)    | 1123.49 (857.06–1396.03) | -21.5% (-39.3 to -0.3%)  |                          |
|              | Jordan               | 39.7% (34.6–45.1%)           | -7.4% (-12.5 to -2.5%)  | 575.7 (457.49–701.54)    | -53.9% (-62.9 to -44.7%) |                          |
|              | Kuwait               | 39.3% (33.3–45.8%)           | -3.7% (-8.6 to 1.3%)    | 368.81 (288.68–456)      | -14.9% (-27.8 to 0.6%)   |                          |
|              | Lebanon              | 44.5% (39.7–49.8%)           | 17.8% (9.5 to 26.1%)    | 335.1 (254.22–430.95)    | -21.9% (-39 to -1.9%)    |                          |
|              | Libya                | 35.1% (29.9–41%)             | 14.7% (2.7 to 26%)      | 552.04 (406.87–743.3)    | -9.8% (-30.4 to 18.5%)   |                          |
|              | Morocco              | 29.4% (24.1–35.1%)           | -12.8% (-22.4 to -2.8%) | 662.81 (496.68–874.36)   | -27.8% (-44.9 to -8%)    |                          |
|              | Palestine            | 38.1% (32.8–43.7%)           | -7.3% (-13.2 to -1.2%)  | 810.72 (655.39–989.01)   | -37.4% (-51.3 to -20%)   |                          |
|              | Oman                 | 26.9% (21.6–32.7%)           | -12.1% (-21.9 to -3.2%) | 507.34 (394.09–645.57)   | -46.1% (-59 to -27.9%)   |                          |
|              | Qatar                | 27.4% (22.2–33.4%)           | -5.9% (-14.9 to 2.2%)   | 247.75 (179.45–327.6)    | -47.9% (-60.7 to -33.5%) |                          |
|              | Saudi Arabia         | 34.6% (28.7–40.8%)           | 12% (3.9 to 20.6%)      | 733.38 (537.4–930.26)    | -20.6% (-41.8 to 9%)     |                          |
|              | Syrian Arab Republic | 37.1% (32.6–42%)             | 1.5% (-5.9 to 9%)       | 749.66 (564.29–986.67)   | -39.3% (-55.7 to -16%)   |                          |
|              | Tunisia              | 32.7% (28.7–37.3%)           | -6.3% (-13.2 to 1.3%)   | 483.49 (362.33–650.51)   | -29.4% (-48 to -4.1%)    |                          |
|              | Türkiye              | 33.6% (29.7–38%)             | -12.1% (-19 to -6%)     | 390.61 (306.85–486.9)    | -32.8% (-52.9 to -14.4%) |                          |
|              | United Arab Emirates | 37.1% (31.1–43.4%)           | 5.1% (-3.9 to 13.7%)    | 714.2 (518.65–943.48)    | -43.2% (-58.1 to -25.4%) |                          |
|              | Yemen                | 44% (38.6–49.2%)             | 1.1% (-6.3 to 8.9%)     | 1218.44 (918.14–1614.27) | -23.7% (-42.4 to 2.3%)   |                          |
|              | Afghanistan          | 40% (34–45.9%)               | 7.1% (0.1 to 16.1%)     | 1397.87 (987.49–1914.43) | -16.1% (-36.2 to 6%)     |                          |
|              | Sudan                | 38.2% (32.3–44.3%)           | 0.7% (-9.1 to 11.1%)    | 989.85 (705.85–1424.5)   | -32.6% (-47.6 to -13.6%) |                          |
| Ischaemic    |                      | Global                       | 42% (34.9–49.1%)        | -3.7% (-6.8 to -1%)      | 335.39 (275.68–404.02)   | -31.1% (-38.1 to -25.2%) |

**Table S15** Burden of neurological conditions attributable to risk factors in North Africa and Middle East countries

| Risk factors | Causes stroke             | Locations                    | DALYs (95% UI)     |                          |                         |                          |
|--------------|---------------------------|------------------------------|--------------------|--------------------------|-------------------------|--------------------------|
|              |                           |                              | PAF (%)            | PAF change (%)           | Rate per 100,000        | Rate change (%)          |
|              |                           |                              | 2019               | From 1990 to 2019        | 2019                    | From 1990 to 2019        |
|              |                           | North Africa and Middle East | 35.3% (29.2–42%)   | -2.5% (-6.4 to 0.7%)     | 418.1 (334.97–521.45)   | -11% (-23.6 to 1.1%)     |
|              |                           | Algeria                      | 35.2% (28.6–42.6%) | -7.5% (-13.7 to -1.8%)   | 449.47 (335.57–583.57)  | -30.4% (-44.7 to -13.4%) |
|              |                           | Bahrain                      | 31.2% (24.3–39%)   | -11.6% (-19.5 to -5.2%)  | 191.36 (141–254.69)     | -50.4% (-59.8 to -40.8%) |
|              |                           | Egypt                        | 32.1% (25.8–39%)   | 16.9% (3.9 to 31.1%)     | 443.61 (309.56–630.09)  | 33.2% (-4 to 72.5%)      |
|              |                           | Iran                         | 32.6% (26.7–39.3%) | -10.4% (-15.4 to -5.7%)  | 320.47 (259.7–395.55)   | -48.7% (-55.3 to -41.5%) |
|              |                           | Iraq                         | 39% (32.5–46.6%)   | -4.5% (-10.9 to 1.8%)    | 714.15 (534.94–901.38)  | -11.2% (-30.5 to 10%)    |
|              |                           | Jordan                       | 40% (33.8–46.7%)   | -6.8% (-12 to -2.1%)     | 433.53 (337.92–544.63)  | -50% (-59.8 to -40.4%)   |
|              |                           | Kuwait                       | 39.7% (32.2–47.8%) | -4.5% (-9.6 to 0.3%)     | 256.02 (194.36–321.04)  | -16% (-28.1 to -0.9%)    |
|              |                           | Lebanon                      | 45.2% (39.5–51.4%) | 16% (9 to 25.6%)         | 269.91 (200.85–343.6)   | -1.5% (-24.2 to 21.4%)   |
|              |                           | Libya                        | 36.9% (30.2–43.9%) | 6% (-0.9 to 13.2%)       | 414.97 (296.17–568.92)  | 17.9% (-7.8 to 52%)      |
|              |                           | Morocco                      | 31.3% (24.5–38.7%) | -10.8% (-19 to -3.7%)    | 502.57 (369.2–674.2)    | 5.7% (-21.3 to 32.2%)    |
|              |                           | Palestine                    | 38.5% (32.2–45.5%) | -6.6% (-12.2 to -1.3%)   | 612.25 (483.43–763.19)  | -23.3% (-39.7 to -2.5%)  |
|              |                           | Oman                         | 29.2% (21.9–36.9%) | -14% (-23.2 to -6%)      | 377.06 (274.5–493.2)    | -29.8% (-46.2 to -6.6%)  |
|              |                           | Qatar                        | 28.9% (21.4–37.3%) | -6.4% (-14.8 to 0.6%)    | 167.08 (115.51–234.2)   | -39.6% (-53.6 to -24.5%) |
|              |                           | Saudi Arabia                 | 36% (27.6–44.2%)   | 11.6% (3.8 to 20.2%)     | 468.52 (331.82–611.03)  | -7.8% (-30.3 to 23.7%)   |
|              |                           | Syrian Arab Republic         | 39.2% (32.9–46%)   | -2.3% (-8.5 to 3.8%)     | 420.08 (313.06–543.38)  | -26.8% (-46.6 to -2.1%)  |
|              |                           | Tunisia                      | 32.5% (27.4–38%)   | -6.1% (-12.6 to 0.2%)    | 355.02 (260.46–480.28)  | -2.2% (-29 to 29.7%)     |
|              |                           | Türkiye                      | 33.8% (28.1–40.5%) | -11.9% (-19 to -5.8%)    | 223.76 (170.63–288.85)  | -18.9% (-43.4 to 1.2%)   |
|              |                           | United Arab Emirates         | 37.4% (29.6–45.1%) | 5% (-3 to 14.3%)         | 529.53 (384.68–704.14)  | -30.6% (-47.9 to -8.3%)  |
|              |                           | Yemen                        | 43.7% (37.2–50.6%) | 3.4% (-2.1 to 9.3%)      | 751.05 (569.53–1000.73) | 23.9% (-3.3 to 60.5%)    |
|              |                           | Afghanistan                  | 39.8% (32.4–47.7%) | 7.5% (3.1 to 13%)        | 742.21 (519.99–1028)    | 37% (4.9 to 73%)         |
|              |                           | Sudan                        | 40.7% (32.8–48.3%) | 0.6% (-5.7 to 7.2%)      | 688.69 (477.74–1021)    | 8.8% (-13.2 to 38.2%)    |
|              | Intracerebral haemorrhage | Global                       | 51.1% (44–58.9%)   | -4.9% (-8.2 to -1.8%)    | 425.25 (358.86–499.8)   | -39.7% (-47 to -33.2%)   |
|              |                           | North Africa and Middle East | 32.1% (27.9–37.1%) | -1.4% (-7.4 to 6.5%)     | 176.31 (143.96–214.44)  | -52.4% (-59.6 to -42.2%) |
|              |                           | Algeria                      | 31% (25.8–36.9%)   | -15.5% (-24.6 to -6.2%)  | 125.32 (91.19–166.21)   | -72.9% (-80.3 to -63.4%) |
|              |                           | Bahrain                      | 27.3% (22.4–32.7%) | -22.3% (-30.6 to -13.9%) | 72.26 (53.73–96.55)     | -72.2% (-79 to -63.1%)   |
|              |                           | Egypt                        | 25% (20–30.7%)     | 24.3% (1 to 55.8%)       | 161.4 (106.01–249.67)   | -49.4% (-65.4 to -26.8%) |
|              |                           | Iran                         | 26.9% (22.8–31.8%) | -15.3% (-22.6 to -7.5%)  | 60.02 (50.45–71.64)     | -60.8% (-67.2 to -53.2%) |
|              |                           | Iraq                         | 37.5% (32.3–43.7%) | -2.8% (-11.6 to 6.7%)    | 384.11 (285.66–511.82)  | -31.9% (-51.5 to -8%)    |
|              |                           | Jordan                       | 38.7% (33.4–44.7%) | -9.3% (-16 to -2.7%)     | 126.23 (97.6–157.03)    | -63.7% (-71.5 to -54.4%) |
|              |                           | Kuwait                       | 38.8% (32.4–45.9%) | -2.7% (-9.1 to 4.4%)     | 95.58 (72.35–121.81)    | -6.8% (-26.5 to 17.3%)   |
|              |                           | Lebanon                      | 41.8% (37.1–46.9%) | 14.6% (5 to 25.7%)       | 53.81 (39.09–75.58)     | -58.7% (-70.8 to -42%)   |
|              |                           | Libya                        | 31.2% (25.5–38%)   | 9% (-4.9 to 26.7%)       | 117.73 (80.19–173.29)   | -46.8% (-62.3 to -23.8%) |
|              |                           | Morocco                      | 24.7% (19.7–30.6%) | -25% (-36.4 to -13.3%)   | 137.02 (96.8–189.04)    | -63.2% (-74.6 to -47.2%) |
|              |                           | Palestine                    | 37% (31.3–43%)     | -9.5% (-17.9 to -0.1%)   | 180.69 (140.58–228.69)  | -60.8% (-70.8 to -46.7%) |
|              |                           | Oman                         | 22.1% (16.6–27.5%) | -21.2% (-30.8 to -12.4%) | 111.31 (80.25–154)      | -68.4% (-76.7 to -55.8%) |
|              |                           | Qatar                        | 24.2% (19.3–29.9%) | -10.8% (-21.6 to 0.5%)   | 58.89 (41.67–81.26)     | -61% (-72.8 to -46.6%)   |
|              |                           | Saudi Arabia                 | 32.5% (26.6–39.2%) | 10% (-0.1 to 22.7%)      | 248.66 (175.88–329.91)  | -35.4% (-55.3 to -3.9%)  |
|              |                           | Syrian Arab Republic         | 36.4% (30.8–42.2%) | -3.4% (-12 to 4.9%)      | 305.58 (217.72–415.7)   | -50.2% (-64.7 to -27.8%) |
|              |                           | Tunisia                      | 33.6% (28.9–38.9%) | -6.3% (-14.9 to 2.9%)    | 108.51 (76.44–149)      | -59.3% (-72.4 to -39.3%) |
|              |                           | Türkiye                      | 32.9% (29.1–37.3%) | -13.7% (-22.2 to -5.7%)  | 131.34 (102.41–165.87)  | -45.6% (-63.9 to -27.7%) |
|              |                           | United Arab Emirates         | 36.4% (30.3–42.7%) | 2% (-10.3 to 16.7%)      | 163.97 (108.55–250.12)  | -63.4% (-76.6 to -44.9%) |
|              |                           | Yemen                        | 44.9% (38.7–51.3%) | -0.2% (-6.9 to 7%)       | 397.13 (278.81–548.6)   | -53.8% (-66.7 to -35.1%) |
|              |                           | Afghanistan                  | 40.4% (32.4–48%)   | 7.3% (1.2 to 14.5%)      | 563.89 (382.96–790.53)  | -42% (-57.2 to -22.8%)   |
|              |                           | Sudan                        | 33.8% (27.2–40.6%) | -8.3% (-17.2 to 2.8%)    | 261.22 (169.21–388.16)  | -63.9% (-74 to -49.8%)   |
|              | Subarachnoid haemorrhage  | Global                       | 46.1% (39.2–53.6%) | -9.5% (-13.7 to -4.2%)   | 62.93 (51.47–77.11)     | -58.6% (-65.2 to -41.2%) |
|              |                           | North Africa and Middle East | 29.1% (24.7–33.9%) | 17.3% (1.5 to 44%)       | 27.42 (21.48–36.32)     | -56.5% (-68.5 to -33.2%) |
|              |                           | Algeria                      | 30.4% (24.8–36.5%) | -11.4% (-23.7 to 2.8%)   | 23.42 (16.01–33.27)     | -68.6% (-79.1 to -50.1%) |
|              |                           | Bahrain                      | 26.2% (20.8–31.8%) | 3.5% (-12 to 24%)        | 16.49 (11.43–24.53)     | -56.6% (-71.5 to -36.6%) |

**Table S15** Burden of neurological conditions attributable to risk factors in North Africa and Middle East countries

| Risk factors | Causes                                  | Locations                    | DALYs (95% UI)     |                          |                       |                          |
|--------------|-----------------------------------------|------------------------------|--------------------|--------------------------|-----------------------|--------------------------|
|              |                                         |                              | PAF (%)            | PAF change (%)           | Rate per 100,000      | Rate change (%)          |
|              |                                         |                              | 2019               | From 1990 to 2019        | 2019                  | From 1990 to 2019        |
|              |                                         | Egypt                        | 18.9% (13.9–26%)   | 81.6% (23.3 to 233.3%)   | 21.68 (13.63–33.96)   | -58.1% (-75.1 to -21.7%) |
|              |                                         | Iran                         | 25.6% (21.3–30.9%) | -14.4% (-25 to -0.5%)    | 13.96 (11.16–17.74)   | -62.1% (-73.9 to -40.9%) |
|              |                                         | Iraq                         | 34.9% (29.5–41.7%) | 10.3% (-4.6 to 26.4%)    | 25.24 (17.61–36.15)   | -60.3% (-75.7 to -35.2%) |
|              |                                         | Jordan                       | 41% (35.4–46.9%)   | -7.2% (-14.5 to 1%)      | 15.94 (11.8–20.24)    | -53.4% (-67.5 to -32.3%) |
|              |                                         | Kuwait                       | 36.7% (30.2–43.5%) | 0.3% (-8.6 to 9.9%)      | 17.22 (13.12–22.08)   | -34.7% (-48.6 to -11.7%) |
|              |                                         | Lebanon                      | 42.6% (37.5–47.7%) | 28.9% (16.3 to 44.8%)    | 11.39 (7.84–16.16)    | -53.9% (-73 to -24.5%)   |
|              |                                         | Libya                        | 26.9% (21–34.1%)   | 47.7% (10.2 to 108.9%)   | 19.34 (12.77–30.58)   | -50.2% (-66.8 to -20.1%) |
|              |                                         | Morocco                      | 23.1% (17.9–28.7%) | -19.2% (-33 to -0.1%)    | 23.22 (14.34–37.09)   | -66.6% (-79.4 to -40.7%) |
|              |                                         | Palestine                    | 35.5% (29.6–41.9%) | -10.1% (-19.9 to 1%)     | 17.77 (13.57–22.27)   | -51.5% (-66.5 to -27.7%) |
|              |                                         | Oman                         | 21.2% (16.3–26.9%) | -4.4% (-22.1 to 25.1%)   | 18.97 (11.24–32.63)   | -64.2% (-78.2 to -28.9%) |
|              |                                         | Qatar                        | 26% (20.7–32.4%)   | -1.3% (-18.4 to 19.8%)   | 21.79 (14.59–29.86)   | -54.9% (-74.6 to -26.5%) |
|              |                                         | Saudi Arabia                 | 32.7% (26.6–39.8%) | 12.7% (-1.6 to 29.6%)    | 16.2 (10.78–22.21)    | -46.5% (-70.2 to -8.6%)  |
|              |                                         | Syrian Arab Republic         | 22% (17.3–27.3%)   | 45.1% (6.1 to 100.7%)    | 24 (17.26–33.63)      | -50% (-69.2 to -16.2%)   |
|              |                                         | Tunisia                      | 30.9% (25.1–36.8%) | -4.1% (-17.4 to 13.4%)   | 19.97 (13.07–28.79)   | -64.2% (-78.9 to -37.9%) |
|              |                                         | Türkiye                      | 35.2% (31–39.5%)   | -7.7% (-17.4 to 4%)      | 35.51 (26.69–45.73)   | -44.5% (-65.8 to -3.8%)  |
|              |                                         | United Arab Emirates         | 33.9% (27.5–40.5%) | 21.3% (0.9 to 47.7%)     | 20.7 (10.23–34.7)     | -57% (-75.3 to -29.3%)   |
|              |                                         | Yemen                        | 42.6% (35.5–49.6%) | 4.8% (-5.5 to 17.8%)     | 70.26 (36.18–120.95)  | -46.6% (-63.2 to -12.6%) |
|              |                                         | Afghanistan                  | 39.1% (30.7–46.9%) | 6.7% (-2.4 to 16%)       | 91.77 (31.12–166.6)   | -39.8% (-59.3 to -5.1%)  |
|              |                                         | Sudan                        | 32.3% (25.2–39.6%) | 0.1% (-14.3 to 23.3%)    | 39.94 (21.06–75.15)   | -64.1% (-77.1 to -31.6%) |
|              | Neurological disorders*                 | Global                       | 5.1% (2.4–9.3%)    | -11.1% (-16.8 to -5.3%)  | 62.36 (29.43–129.99)  | -12.4% (-17.9 to -6.1%)  |
|              |                                         | North Africa and Middle East | 4.2% (1.6–8.7%)    | -5.5% (-15 to 5%)        | 57.43 (21.05–137.7)   | -9.8% (-18.9 to 4%)      |
|              |                                         | Algeria                      | 5.3% (2–10.8%)     | -6.1% (-22.3 to 16.1%)   | 71.69 (25.43–174.23)  | -15.2% (-30.6 to 5.6%)   |
|              |                                         | Bahrain                      | 4.8% (1.9–9.8%)    | -17.1% (-34.8 to 1%)     | 66 (24.95–153.87)     | -24.2% (-43.2 to -3.8%)  |
|              |                                         | Egypt                        | 5.2% (1.7–11.4%)   | 34.5% (11.4 to 60.7%)    | 68.64 (22.32–171.11)  | 35.1% (10.9 to 63.3%)    |
|              |                                         | Iran                         | 3.4% (1.3–6.8%)    | -1.2% (-15.8 to 18.4%)   | 46.44 (17.78–106.51)  | -6.2% (-19.8 to 16%)     |
|              |                                         | Iraq                         | 4.9% (1.7–10.5%)   | -15% (-30.6 to -0.2%)    | 64.74 (20.78–160.07)  | -16.5% (-32.9 to -0.3%)  |
|              |                                         | Jordan                       | 6.1% (2.3–12.8%)   | -10.9% (-27.1 to 10.8%)  | 77.68 (28.33–183.92)  | -15.9% (-32.4 to 6.4%)   |
|              |                                         | Kuwait                       | 5.3% (2–11%)       | 1% (-18.5 to 29.3%)      | 67.91 (24.43–158.09)  | -4.4% (-20.9 to 17.5%)   |
|              |                                         | Lebanon                      | 8.3% (3.3–16.9%)   | 19.6% (-1.1 to 45.4%)    | 110.61 (41.44–257.97) | 15% (-7.2 to 51.9%)      |
|              |                                         | Libya                        | 3.7% (1.4–7.6%)    | -19.2% (-34.4 to 0.3%)   | 50.91 (17.35–123.46)  | -21.9% (-38.1 to 1.3%)   |
|              |                                         | Morocco                      | 2.6% (0.9–5.5%)    | -29.3% (-44.3 to -15.8%) | 34.57 (11.69–87.38)   | -27.7% (-44.6 to -12.9%) |
|              |                                         | Palestine                    | 4.4% (1.7–8.9%)    | -6.6% (-22.5 to 16%)     | 59.57 (21.84–146.77)  | -12.1% (-29.7 to 14.2%)  |
|              |                                         | Oman                         | 2.4% (0.8–5%)      | -21.7% (-38 to 0.3%)     | 32.35 (10.02–78.68)   | -21.1% (-38.7 to 4.5%)   |
|              |                                         | Qatar                        | 4.2% (1.5–8.8%)    | 43.3% (11.8 to 78.6%)    | 56.5 (17.03–141.38)   | 40.3% (3.3 to 85.9%)     |
|              |                                         | Saudi Arabia                 | 2.7% (0.9–5.7%)    | -1.5% (-30.7 to 34.4%)   | 37.94 (11.38–95.31)   | -1.5% (-31.3 to 38.8%)   |
|              |                                         | Syrian Arab Republic         | 5.1% (1.8–10.7%)   | -17.1% (-33.5 to 1.4%)   | 66.86 (22.26–162.13)  | -15.9% (-35.2 to 10.5%)  |
|              |                                         | Tunisia                      | 5.3% (2.2–10.3%)   | -11.1% (-25.3 to 6.2%)   | 70.09 (26.33–160.22)  | -13.5% (-30.9 to 14.6%)  |
|              |                                         | Türkiye                      | 4.7% (2.1–8.7%)    | -9.8% (-25 to 12%)       | 68.96 (28.6–152.4)    | -18.7% (-34.4 to 7.3%)   |
|              |                                         | United Arab Emirates         | 4.1% (1.6–8.6%)    | -6.5% (-38.4 to 18.5%)   | 58.72 (20.72–141.84)  | -12.3% (-46.3 to 20.2%)  |
|              |                                         | Yemen                        | 5% (1.8–10.4%)     | 7.3% (-14.2 to 28.8%)    | 65.41 (22.08–162.98)  | 4.8% (-18.6 to 31.3%)    |
|              |                                         | Afghanistan                  | 2.5% (0.8–5.3%)    | 39.8% (7.4 to 89.5%)     | 37.25 (10.85–97.42)   | 24.9% (-4.9 to 62.3%)    |
|              |                                         | Sudan                        | 3.6% (1.2–8%)      | -1.2% (-24.7 to 25.5%)   | 48.17 (14.41–122.46)  | -8.6% (-30.7 to 13.5%)   |
|              | Alzheimer's disease and other dementias | Global                       | 15.1% (9.7–20.3%)  | -17.3% (-22.8 to -13%)   | 51.3 (20.5–116.23)    | -14.2% (-20.2 to -8.4%)  |
|              |                                         | North Africa and Middle East | 15.4% (9.9–20.7%)  | -9.8% (-16.6 to -3.1%)   | 59.52 (23.58–138.55)  | -10.8% (-19.1 to 0.9%)   |
|              |                                         | Algeria                      | 18.3% (12–24.6%)   | -15.3% (-26.2 to -3.8%)  | 73.48 (28.36–173.87)  | -19.7% (-34.5 to -3.1%)  |
|              |                                         | Bahrain                      | 16.2% (9.7–22.5%)  | -13.2% (-29.5 to 6.2%)   | 65.04 (24.5–154.34)   | -16.5% (-33.8 to 6.7%)   |
|              |                                         | Egypt                        | 21.2% (13.7–27.8%) | 35.9% (18.8 to 56%)      | 76.64 (30.52–179.39)  | 36.1% (12 to 65.5%)      |
|              |                                         | Iran                         | 11.9% (7.4–16.7%)  | -11.1% (-24.2 to 2%)     | 45.95 (17.5–104.67)   | -11.3% (-24.8 to 7.2%)   |
|              |                                         | Iraq                         | 18.7% (12.3–25%)   | -13.4% (-26.3 to -1.8%)  | 71.81 (28.39–166.42)  | -11.6% (-27.2 to 4%)     |
|              |                                         | Jordan                       | 22.2% (14.7–29.6%) | -16.1% (-28.4 to -3.5%)  | 81.91 (33.06–185.32)  | -19.7% (-35.1 to -3.1%)  |

**Table S15** Burden of neurological conditions attributable to risk factors in North Africa and Middle East countries

| Risk factors | Causes              | Locations                    | DALYs (95% UI)       |                          |                       |                          |
|--------------|---------------------|------------------------------|----------------------|--------------------------|-----------------------|--------------------------|
|              |                     |                              | PAF (%)              | PAF change (%)           | Rate per 100,000      | Rate change (%)          |
|              |                     |                              | 2019                 | From 1990 to 2019        | 2019                  | From 1990 to 2019        |
|              |                     | Kuwait                       | 18.4% (11.8–25.6%)   | -6.4% (-21 to 10.4%)     | 71.55 (28.66–161.31)  | -8.6% (-24.7 to 10.3%)   |
|              |                     | Lebanon                      | 28.6% (18.5–37.6%)   | 22.3% (3 to 42.1%)       | 113.14 (44.96–260.28) | 19.3% (-3.1 to 61.1%)    |
|              |                     | Libya                        | 13% (8.3–17.5%)      | -20.8% (-31.4 to -9.4%)  | 54.03 (20–125.95)     | -24.3% (-40 to -4%)      |
|              |                     | Morocco                      | 9.4% (5.6–13.4%)     | -25.4% (-38.9 to -13.3%) | 36.19 (13.29–88.23)   | -25.1% (-40.2 to -9.7%)  |
|              |                     | Palestine                    | 15.6% (10.1–20.9%)   | -12.8% (-27.7 to 2.2%)   | 60.57 (23.4–143.42)   | -16.6% (-32.9 to 7%)     |
|              |                     | Oman                         | 8.2% (4.9–11.8%)     | -18.9% (-34.6 to 1.2%)   | 34.46 (12.68–81.66)   | -21.6% (-37.8 to 3.2%)   |
|              |                     | Qatar                        | 15% (9–21%)          | 37.9% (10.1 to 68%)      | 60.88 (22.14–145.63)  | 42.2% (4.6 to 85.2%)     |
|              |                     | Saudi Arabia                 | 10.6% (6.3–15.5%)    | 5% (-20.1 to 34.6%)      | 41.4 (15.38–99)       | 2.7% (-25.9 to 43.7%)    |
|              |                     | Syrian Arab Republic         | 18.5% (11.7–25.1%)   | -17.8% (-30.7 to -5.4%)  | 72.09 (27.43–168.15)  | -15.6% (-34.6 to 10%)    |
|              |                     | Tunisia                      | 17.1% (11.6–22.7%)   | -15.8% (-26.7 to -4.5%)  | 68.77 (27.05–161.72)  | -17.5% (-34.3 to 6.7%)   |
|              |                     | Türkiye                      | 16.2% (10.5–21.7%)   | -23.1% (-34.6 to -13.1%) | 64.14 (24.87–147.81)  | -24.6% (-37.9 to -8.4%)  |
|              |                     | United Arab Emirates         | 15.5% (9.4–22.5%)    | 16.7% (-6.1 to 46.1%)    | 56.89 (20.99–135.49)  | 10.7% (-15.4 to 49%)     |
|              |                     | Yemen                        | 18.1% (11.5–24.6%)   | 10.9% (-7.5 to 31%)      | 69.46 (26.81–167.49)  | 10.5% (-12.5 to 38.1%)   |
|              |                     | Afghanistan                  | 9.2% (5.6–13.3%)     | 24.6% (-1.8 to 51.6%)    | 39.94 (13.66–101.34)  | 19.9% (-8.2 to 51.3%)    |
|              |                     | Sudan                        | 14.8% (8.9–21.3%)    | 0.5% (-18.3 to 22.7%)    | 54.37 (20.43–131.07)  | -3.5% (-23.1 to 20.4%)   |
|              | Parkinson's disease | Global                       | -10% (-15.1–-5.2%)   | -22.2% (-27.5 to -17.1%) | -8.02 (-12.33–4.11)   | -20.4% (-27.9 to -12.9%) |
|              |                     | North Africa and Middle East | -9.1% (-13.4–-4.8%)  | -19.7% (-30 to -9.3%)    | -7.65 (-11.54–-4.01)  | -19% (-31.8 to -1.7%)    |
|              |                     | Algeria                      | -9.1% (-13.6–-4.9%)  | -24.4% (-39.5 to -8.4%)  | -7.22 (-11.49–-3.66)  | -38% (-55.3 to -14.6%)   |
|              |                     | Bahrain                      | -8.2% (-12.5–-4.4%)  | -28.7% (-46.2 to -5.5%)  | -7.31 (-11.81–-3.64)  | -38.3% (-57.6 to -11.6%) |
|              |                     | Egypt                        | -10.7% (-16.1–-5.5%) | 21.8% (-1.9 to 50.1%)    | -10.55 (-17.15–-5.12) | 36.2% (0.6 to 80.7%)     |
|              |                     | Iran                         | -6.4% (-9.8–-3.2%)   | -23.3% (-37.6 to -7.8%)  | -4.95 (-7.59–-2.39)   | -20.8% (-40.1 to 4.9%)   |
|              |                     | Iraq                         | -13% (-19.8–-7%)     | -22% (-38.2 to -5%)      | -11.14 (-17.84–-5.86) | -8.6% (-34.3 to 25.6%)   |
|              |                     | Jordan                       | -13% (-19.7–-6.5%)   | -27.2% (-42.1 to -7.9%)  | -9.66 (-15.35–-4.7)   | -37.1% (-54.1 to -17.7%) |
|              |                     | Kuwait                       | -10.5% (-15.4–-5.8%) | -10.8% (-30.1 to 12.8%)  | -5.92 (-9.05–-3.05)   | -34.7% (-51.7 to -13.6%) |
|              |                     | Lebanon                      | -17% (-25.5–-9%)     | 26.7% (0.5 to 57.3%)     | -11.82 (-19.08–-6.02) | 8.8% (-22.7 to 55.2%)    |
|              |                     | Libya                        | -8.3% (-12.4–-4.4%)  | -25.8% (-40.3 to -8.2%)  | -7.03 (-11.29–-3.48)  | -17.9% (-41.6 to 19.3%)  |
|              |                     | Morocco                      | -5.2% (-8–-2.6%)     | -34.1% (-46.6 to -17.7%) | -5 (-7.8–-2.41)       | -7.9% (-33.3 to 24.8%)   |
|              |                     | Palestine                    | -10.9% (-16.1–-5.7%) | -17.4% (-37.6 to 6.4%)   | -10.11 (-15.79–-4.83) | -21.6% (-45.4 to 21.8%)  |
|              |                     | Oman                         | -3.9% (-5.9–-2.1%)   | -30.7% (-48.5 to -6.5%)  | -4.9 (-7.63–-2.26)    | -9.3% (-41.2 to 40%)     |
|              |                     | Qatar                        | -6.2% (-9.4–-3.2%)   | -11.5% (-34.2 to 15.1%)  | -9.14 (-15.26–-4.55)  | 1.3% (-32.7 to 50.8%)    |
|              |                     | Saudi Arabia                 | -5.9% (-8.8–-3.2%)   | 6.3% (-23.4 to 41.6%)    | -6.55 (-10.08–-3.22)  | 7.7% (-29.9 to 74.6%)    |
|              |                     | Syrian Arab Republic         | -10.1% (-15.7–-5.2%) | -32% (-46.8 to -16%)     | -8.51 (-13.98–-3.93)  | -22.7% (-45.7 to 10%)    |
|              |                     | Tunisia                      | -12.1% (-18.6–-6.1%) | -21.5% (-37.9 to -2.7%)  | -8.79 (-14.38–-4.17)  | -12.8% (-38.8 to 22.4%)  |
|              |                     | Türkiye                      | -10.9% (-16.6–-5.3%) | -36.7% (-49.7 to -22.7%) | -8.21 (-13.68–-4.03)  | -41.9% (-57.4 to -21.5%) |
|              |                     | United Arab Emirates         | -7.3% (-11.3–-3.7%)  | 13.5% (-13.9 to 47.3%)   | -9.45 (-15.95–-4.54)  | 1.8% (-31.8 to 50.1%)    |
|              |                     | Yemen                        | -10.8% (-15.6–-5.9%) | -7.1% (-25.1 to 18.1%)   | -8.27 (-12.97–-4.37)  | 7.2% (-23.8 to 55.5%)    |
|              |                     | Afghanistan                  | -4.4% (-6.9–-2.3%)   | 21.8% (-7.4 to 53.8%)    | -5.04 (-8.04–-2.55)   | 14.4% (-18.8 to 57.9%)   |
|              |                     | Sudan                        | -8.8% (-13.2–-4.8%)  | -11% (-33.9 to 16.9%)    | -7.55 (-12.17–-3.96)  | -15% (-41.1 to 31.7%)    |
|              | Idiopathic epilepsy | Global                       | 10.1% (7.3–13%)      | 11.2% (-2.6 to 23.8%)    | 17.16 (11.54–23.99)   | -7% (-16.7 to 3.9%)      |
|              |                     | North Africa and Middle East | 2.1% (1.4–3.1%)      | 11.8% (-16 to 45.8%)     | 3.4 (1.88–5.53)       | -17% (-44.5 to 21.7%)    |
|              |                     | Algeria                      | 2.5% (1.4–3.6%)      | 103.9% (47.9 to 201.7%)  | 3.57 (1.45–6.69)      | 25.7% (-45 to 174.2%)    |
|              |                     | Bahrain                      | 3.7% (2.4–5.6%)      | -48.2% (-62.9 to -34%)   | 6.94 (2.89–12.81)     | -64.8% (-85.2 to -20%)   |
|              |                     | Egypt                        | 1% (0.4–1.7%)        | 21.1% (-31.8 to 123.7%)  | 1.05 (0.32–2.4)       | -3.5% (-66.4 to 165%)    |
|              |                     | Iran                         | 1.8% (1.2–2.6%)      | 367.8% (206.3 to 790.7%) | 2.54 (1.48–4.02)      | 204.6% (90.2 to 478.2%)  |
|              |                     | Iraq                         | 1.8% (0.9–2.9%)      | -48.6% (-71.1 to -21.2%) | 2.34 (0.8–4.95)       | -64.2% (-86.1 to -18.8%) |
|              |                     | Jordan                       | 2% (1–3.3%)          | 36.3% (-17.3 to 139.4%)  | 2.43 (0.81–5.22)      | 6.3% (-60.5 to 176.6%)   |
|              |                     | Kuwait                       | 0.3% (0–0.6%)        |                          | 0.35 (0.04–1.02)      |                          |
|              |                     | Lebanon                      | 3.3% (2–4.8%)        | -34.3% (-54.8 to -12.5%) | 4.27 (1.85–8.28)      | -51.4% (-78.9 to 2.9%)   |
|              |                     | Libya                        | 1.1% (0.3–1.7%)      | 353.6% (27.6 to 721.5%)  | 1.58 (0.46–2.86)      | 218% (-16.4 to 732.1%)   |

**Table S15** Burden of neurological conditions attributable to risk factors in North Africa and Middle East countries

| Risk factors                              | Causes             | Locations                    | DALYs (95% UI)     |                          |                   |                          |
|-------------------------------------------|--------------------|------------------------------|--------------------|--------------------------|-------------------|--------------------------|
|                                           |                    |                              | PAF (%)            | PAF change (%)           | Rate per 100,000  | Rate change (%)          |
|                                           |                    |                              | 2019               | From 1990 to 2019        | 2019              | From 1990 to 2019        |
|                                           |                    | Morocco                      | 1.5% (0.8–2.4%)    | -33.3% (-55.5 to -8.5%)  | 2.02 (0.62–4.57)  | -41.1% (-80.8 to 45.7%)  |
|                                           |                    | Palestine                    | 4.1% (2.6–6%)      | 55.8% (16.1 to 143.6%)   | 6.58 (3.52–11.23) | 17.3% (-39.2 to 139.2%)  |
|                                           |                    | Oman                         | 1.4% (0.6–2.3%)    | 40.5% (-3.6 to 121.4%)   | 1.45 (0.39–3.28)  | 26.3% (-57.8 to 272.4%)  |
|                                           |                    | Qatar                        | 2.5% (1.4–3.8%)    | -16.9% (-38.9 to 9.4%)   | 3.12 (0.98–6.66)  | -40.8% (-79.2 to 69.9%)  |
|                                           |                    | Saudi Arabia                 | 0.9% (0.2–1.9%)    | -42.2% (-67 to -18.2%)   | 2.04 (0.31–4.94)  | -43.1% (-78.4 to 26.9%)  |
|                                           |                    | Syrian Arab Republic         | 1.5% (0.8–2.3%)    | -42% (-60.2 to -22.7%)   | 1.57 (0.65–2.92)  | -52.2% (-79.7 to 11%)    |
|                                           |                    | Tunisia                      | 6.5% (4.3–9%)      | 89.8% (45.9 to 153.5%)   | 7.65 (3.66–14.02) | 37.5% (-33.7 to 202.8%)  |
|                                           |                    | Türkiye                      | 4.6% (2.9–6.4%)    | 45% (5.9 to 110.1%)      | 9.8 (4.23–18.05)  | 1.5% (-52.2 to 125.2%)   |
|                                           |                    | United Arab Emirates         | 4.2% (2.3–6.5%)    | -44.3% (-66.7 to -22.4%) | 8.98 (3.52–17.33) | -60.4% (-84 to -12.8%)   |
|                                           |                    | Yemen                        | 1.5% (0.9–2.3%)    | -45.2% (-65.5 to -21.1%) | 2.23 (0.97–4.09)  | -60.1% (-81.7 to -15.8%) |
|                                           |                    | Afghanistan                  | 0.3% (0.1–0.6%)    |                          | 0.7 (0.21–1.49)   |                          |
|                                           |                    | Sudan                        | 0.1% (0–0.2%)      | -94.4% (-98.2 to -88.1%) | 0.15 (0.04–0.39)  | -96.3% (-99 to -91.1%)   |
|                                           | Multiple sclerosis | Global                       | 13.7% (10.4–17.2%) | -25.6% (-30.1 to -19%)   | 1.92 (1.41–2.54)  | -35.4% (-41.4 to -28.2%) |
|                                           |                    | North Africa and Middle East | 10.8% (7.8–14.5%)  | -12% (-28.2 to 5%)       | 2.15 (1.51–2.96)  | -6.7% (-28.5 to 8.8%)    |
|                                           |                    | Algeria                      | 9.3% (6.6–12.1%)   | -13% (-31.7 to 11.3%)    | 1.86 (1.19–2.65)  | -1.8% (-30.6 to 27.5%)   |
|                                           |                    | Bahrain                      | 10.7% (7.7–13.9%)  | -15.3% (-28 to -1.2%)    | 1.33 (0.85–1.95)  | -4.7% (-30 to 22.4%)     |
|                                           |                    | Egypt                        | 10.3% (3.6–17.8%)  | 24.9% (-45.6 to 145.4%)  | 1.51 (0.82–3.25)  | 30.4% (-7 to 67.5%)      |
|                                           |                    | Iran                         | 9.8% (7.2–13.5%)   | -6.6% (-22.4 to 14.2%)   | 2.89 (1.89–4.69)  | -6.3% (-34.1 to 15%)     |
|                                           |                    | Iraq                         | 12.1% (8.9–16.1%)  | -18.9% (-32.4 to -2.3%)  | 1.74 (1.13–2.56)  | -8.9% (-32.6 to 16.9%)   |
|                                           |                    | Jordan                       | 15.8% (12.1–19.5%) | -3.2% (-18.5 to 16.1%)   | 3 (2.02–4.11)     | -9.9% (-29.5 to 16.2%)   |
|                                           |                    | Kuwait                       | 11.2% (7.8–14.7%)  | -25.4% (-36.7 to -11.7%) | 1.94 (1.24–2.79)  | 3% (-15.4 to 26%)        |
|                                           |                    | Lebanon                      | 21.4% (16.2–26.9%) | 21.7% (4.7 to 41.8%)     | 5.02 (3.35–7)     | 47% (13.9 to 92.5%)      |
|                                           |                    | Libya                        | 10.8% (7.3–14.3%)  | -9.5% (-31.6 to 13.1%)   | 2.34 (1.48–3.23)  | 20.7% (-13.8 to 67%)     |
|                                           |                    | Morocco                      | 6.8% (4.9–8.8%)    | -27.9% (-40.8 to -9.7%)  | 1.36 (0.87–1.89)  | -9.9% (-36.8 to 23.1%)   |
|                                           |                    | Palestine                    | 13% (9.6–17.7%)    | -5.3% (-24.9 to 23.5%)   | 2.54 (1.64–3.81)  | 2.9% (-34.2 to 43%)      |
|                                           |                    | Oman                         | 7.9% (5.6–10.6%)   | -16.9% (-35.2 to 7.2%)   | 1.34 (0.82–1.93)  | -0.3% (-40 to 37.9%)     |
|                                           |                    | Qatar                        | 9.8% (7–12.7%)     | 0.7% (-16.8 to 21.9%)    | 1.64 (1.03–2.38)  | 34.6% (-2.4 to 80.1%)    |
|                                           |                    | Saudi Arabia                 | 8.9% (6.4–11.9%)   | 27.3% (1.9 to 61.3%)     | 1.04 (0.66–1.52)  | 56.6% (9.9 to 129.6%)    |
|                                           |                    | Syrian Arab Republic         | 11.4% (8.4–14.4%)  | -19.7% (-34.7 to -3.7%)  | 1.72 (1.15–2.47)  | -7.3% (-31.4 to 18.8%)   |
|                                           |                    | Tunisia                      | 11.1% (8.1–14.1%)  | -11.3% (-26.6 to 11.1%)  | 2.46 (1.6–3.44)   | 11.5% (-15.6 to 43.6%)   |
|                                           |                    | Türkiye                      | 15.5% (10.5–19.8%) | -14.4% (-35.8 to 19.7%)  | 3.24 (2.26–4.44)  | -24.4% (-44.7 to -3.9%)  |
|                                           |                    | United Arab Emirates         | 11.2% (7.7–15.2%)  | -9.7% (-27.1 to 9.9%)    | 2.31 (1.23–3.95)  | 7.7% (-31.6 to 58.1%)    |
|                                           |                    | Yemen                        | 14.3% (10.2–18.6%) | -7.4% (-23.3 to 13.2%)   | 1.99 (1.25–2.86)  | 16.6% (-22.8 to 68%)     |
|                                           |                    | Afghanistan                  | 6.2% (3.9–9.2%)    | 62.7% (27.1 to 111.4%)   | 1.66 (0.95–2.79)  | 81.4% (26.4 to 153.6%)   |
|                                           |                    | Sudan                        | 8.6% (5.6–12%)     | -12.1% (-31.4 to 18%)    | 1.2 (0.68–1.86)   | 5.8% (-31.7 to 50.8%)    |
| Environmental /occupational risk factors§ | Meningitis         | Global                       | 2% (1.7–2.2%)      | 7.5% (-7.8 to 24.1%)     | 4.62 (3.65–5.97)  | -53.9% (-63.3 to -41.2%) |
|                                           |                    | North Africa and Middle East | 1.6% (1.2–2.2%)    | -10.2% (-39.3 to 27.6%)  | 1.11 (0.76–1.62)  | -78.3% (-86.3 to -65.8%) |
|                                           |                    | Algeria                      | 0.8% (0.3–1.5%)    | 10.5% (-67.9 to 390.3%)  | 0.3 (0.1–0.61)    | -78% (-94 to -3.9%)      |
|                                           |                    | Bahrain                      | 0.4% (0.2–0.7%)    | -56.1% (-82 to 7.8%)     | 0.07 (0.04–0.12)  | -88.8% (-95.5 to -71.5%) |
|                                           |                    | Egypt                        | 2.2% (1.4–1%)      | -33.8% (-73 to 42%)      | 1.21 (0.49–2.46)  | -83.7% (-94.2 to -63.3%) |
|                                           |                    | Iran                         | 0.8% (0.6–1%)      | -29.5% (-51.9 to -2.2%)  | 0.3 (0.2–0.41)    | -85.4% (-91.3 to -76.8%) |
|                                           |                    | Iraq                         | 1.6% (0.9–2.7%)    | -26.9% (-65.7 to 58.5%)  | 1.09 (0.56–1.86)  | -85.4% (-94 to -65.4%)   |
|                                           |                    | Jordan                       | 0.8% (0.3–1.5%)    | -7.9% (-67.5 to 198.9%)  | 0.42 (0.17–0.85)  | -59.9% (-87.5 to 36.2%)  |
|                                           |                    | Kuwait                       | 1.4% (0.8–2.3%)    | 2.1% (-49.9 to 94.2%)    | 0.29 (0.14–0.48)  | -62.2% (-81.8 to -26.4%) |
|                                           |                    | Lebanon                      | 0.4% (0.1–1%)      | -53.1% (-89.1 to 97.6%)  | 0.13 (0.04–0.31)  | -85.2% (-96.5 to -37.5%) |
|                                           |                    | Libya                        | 0.4% (0.2–0.7%)    | -70.3% (-89 to -20.9%)   | 0.14 (0.06–0.28)  | -91% (-96.9 to -75.8%)   |
|                                           |                    | Morocco                      | 1.6% (0.7–3.1%)    | -20.2% (-73.3 to 140.4%) | 1.13 (0.44–2.29)  | -85.6% (-95.6 to -54.2%) |
|                                           |                    | Palestine                    | 0.6% (0.2–1.1%)    | -33.9% (-77.3 to 102%)   | 0.24 (0.08–0.46)  | -88.4% (-96 to -66%)     |
|                                           |                    | Oman                         | 0.8% (0.3–1.6%)    | -40% (-77.3 to 36.6%)    | 0.2 (0.07–0.41)   | -84.3% (-94.5 to -60.3%) |
|                                           |                    | Qatar                        | 0.8% (0.5–1.4%)    | -44.1% (-73.9 to 13.7%)  | 0.21 (0.12–0.35)  | -85% (-93.1 to -67.7%)   |



**Table S15** Burden of neurological conditions attributable to risk factors in North Africa and Middle East countries

| Risk factors | Causes       | Locations                    | DALYs (95% UI)     |                          |                          |                          |
|--------------|--------------|------------------------------|--------------------|--------------------------|--------------------------|--------------------------|
|              |              |                              | PAF (%)            | PAF change (%)           | Rate per 100,000         | Rate change (%)          |
|              |              |                              | 2019               | From 1990 to 2019        | 2019                     | From 1990 to 2019        |
|              |              | Saudi Arabia                 | 0.1% (0.0-0.2%)    | -62.6% (-87.4 to -0.4%)  | 0.03 (0.01-0.06)         | -90% (-96.4 to -74.6%)   |
|              |              | Syrian Arab Republic         | 0.4% (0.1-0.7%)    | -55.2% (-87.3 to 39.7%)  | 0.37 (0.12-0.74)         | -86.9% (-96.5 to -57.2%) |
|              |              | Tunisia                      | 0.9% (0.3-1.9%)    | -1.9% (-72.9 to 223.1%)  | 0.36 (0.1-0.75)          | -77.4% (-94.5 to -17.8%) |
|              |              | Türkiye                      | 0.2% (0.1-0.5%)    | -39% (-80.5 to 95.9%)    | 0.06 (0.02-0.13)         | -93.8% (-98.2 to -78.9%) |
|              |              | United Arab Emirates         | 0.3% (0.1-0.7%)    | -71.4% (-90.8 to -25.8%) | 0.08 (0.03-0.22)         | -92.7% (-97.6 to -80.6%) |
|              |              | Yemen                        | 1.1% (0.6-1.8%)    | -33.8% (-69 to 36.5%)    | 1.07 (0.56-1.82)         | -79.2% (-90.3 to -57.6%) |
|              |              | Afghanistan                  | 1.6% (0.8-2.8%)    | -25.6% (-65.9 to 81.2%)  | 3.88 (1.8-6.96)          | -80.3% (-91.4 to -52.2%) |
|              |              | Sudan                        | 1.2% (0.6-2.2%)    | -34.3% (-70.4 to 43.6%)  | 1.19 (0.51-2.23)         | -90.2% (-95.6 to -79.7%) |
|              | Encephalitis | Global                       | 0.6% (0.5-0.7%)    | 31.5% (-7.9 to 79.7%)    | 0.39 (0.3-0.51)          | -39.8% (-60 to -6.3%)    |
|              |              | North Africa and Middle East | 0.8% (0.5-1.4%)    | 8.3% (-36.9 to 85.9%)    | 0.35 (0.21-0.59)         | -14.9% (-54.3 to 56.2%)  |
|              |              | Algeria                      | 0.4% (0.1-1%)      | 50.1% (-63.6 to 590.4%)  | 0.08 (0.02-0.18)         | 6% (-74.1 to 359.5%)     |
|              |              | Bahrain                      | 0.2% (0.1-0.4%)    | -36.6% (-76.2 to 71.1%)  | 0.03 (0.01-0.05)         | -52.7% (-83.4 to 28.6%)  |
|              |              | Egypt                        | 1.6% (0.5-3.3%)    | 3.3% (-60.5 to 151%)     | 1.03 (0.18-2.39)         | -29.8% (-76.3 to 74%)    |
|              |              | Iran                         | 0.6% (0.2-0.9%)    | 14.7% (-26.7 to 63%)     | 0.1 (0.03-0.15)          | -9.6% (-51.9 to 45%)     |
|              |              | Iraq                         | 0.6% (0.3-1.2%)    | -2.6% (-61.1 to 146.3%)  | 0.46 (0.16-0.91)         | -35.3% (-76.1 to 67.1%)  |
|              |              | Jordan                       | 0.2% (0.1-0.4%)    | -31.2% (-80.4 to 164.7%) | 0.02 (0.01-0.04)         | -73% (-93.5 to 37.6%)    |
|              |              | Kuwait                       | 0.5% (0.3-0.8%)    | 20.4% (-47.9 to 150%)    | 0.06 (0.03-0.09)         | -11.4% (-61.6 to 92%)    |
|              |              | Lebanon                      | 0.4% (0.1-0.9%)    | -6.4% (-80.4 to 380.2%)  | 0.06 (0.01-0.15)         | -23.6% (-84.9 to 286.8%) |
|              |              | Libya                        | 0.4% (0.1-0.9%)    | -30.9% (-79.1 to 109.7%) | 0.07 (0.02-0.14)         | -37.5% (-83.3 to 82.4%)  |
|              |              | Morocco                      | 0.9% (0.3-2.1%)    | 12.5% (-63.5 to 260.1%)  | 0.22 (0.08-0.47)         | -7.1% (-70.9 to 190%)    |
|              |              | Palestine                    | 0.3% (0.1-0.6%)    | -15.7% (-77.4 to 179.1%) | 0.05 (0.01-0.1)          | -34.1% (-83.5 to 126.1%) |
|              |              | Oman                         | 0.4% (0.2-0.8%)    | -8.9% (-70.4 to 177.8%)  | 0.46 (0.17-0.96)         | -49.1% (-85.2 to 57%)    |
|              |              | Qatar                        | 0.4% (0.2-0.7%)    | -17.4% (-64.3 to 100.6%) | 0.05 (0.02-0.1)          | -41.4% (-77 to 37%)      |
|              |              | Saudi Arabia                 | 0.1% (0.0-0.5%)    | -0.6% (-77.4 to 172.4%)  | 0.04 (0.01-0.15)         | -49.5% (-89.5 to 45.4%)  |
|              |              | Syrian Arab Republic         | 0.2% (0.1-0.4%)    | -28.9% (-77.2 to 113.1%) | 0.06 (0.02-0.12)         | -57.7% (-88.5 to 38.5%)  |
|              |              | Tunisia                      | 0.4% (0.1-1%)      | 7.3% (-71.6 to 289.8%)   | 0.07 (0.02-0.17)         | -24.2% (-81.6 to 188.9%) |
|              |              | Türkiye                      | 0.1% (0.0-0.3%)    | -21.5% (-81.4 to 177.3%) | 0.02 (0.01-0.05)         | -58.4% (-91.2 to 62.5%)  |
|              |              | United Arab Emirates         | 0.4% (0.1-0.9%)    | -15.1% (-75.2 to 156.9%) | 0.07 (0.02-0.15)         | -32.4% (-81.4 to 130.9%) |
|              |              | Yemen                        | 0.5% (0.2-1%)      | -20.2% (-70.1 to 116.5%) | 0.15 (0.07-0.29)         | -25.9% (-71 to 86.7%)    |
|              |              | Afghanistan                  | 0.3% (0.1-0.7%)    | -12.3% (-63.7 to 116.7%) | 0.56 (0.21-1.51)         | -25.9% (-70.4 to 85.9%)  |
|              |              | Sudan                        | 0.5% (0.2-1.1%)    | -21% (-71.9 to 121.6%)   | 0.15 (0.07-0.29)         | -39.4% (-77 to 76.3%)    |
|              | Stroke       | Global                       | 37.3% (34.4-40.3%) | -8.2% (-12.3 to -4.2%)   | 658.89 (586.74-729.11)   | -40.6% (-46.5 to -34.5%) |
|              |              | North Africa and Middle East | 37.5% (34.5-40.7%) | -2.2% (-6.9 to 3.9%)     | 685.01 (590.56-792.82)   | -33.5% (-41.7 to -22.2%) |
|              |              | Algeria                      | 30.8% (24.7-36.6%) | -1.6% (-7.5 to 3.4%)     | 540.94 (400.88-699.41)   | -45.5% (-56.7 to -31.7%) |
|              |              | Bahrain                      | 37.8% (33-42.2%)   | -4.5% (-11.1 to 2.4%)    | 355.66 (283.74-453.8)    | -54.6% (-63.3 to -43.1%) |
|              |              | Egypt                        | 41% (35.7-45.5%)   | 26.7% (8 to 42.9%)       | 878.28 (641.37-1202.41)  | -18% (-37.5 to 6.1%)     |
|              |              | Iran                         | 36.6% (33.5-40%)   | -4.8% (-7.4 to -2.4%)    | 461.69 (408.72-516.02)   | -48.3% (-53.5 to -40.7%) |
|              |              | Iraq                         | 38.7% (33.3-43.8%) | -6.9% (-11.5 to -3%)     | 1132.07 (874.59-1418.34) | -24.9% (-41.3 to -5.6%)  |
|              |              | Jordan                       | 29% (24.8-33.3%)   | -1.3% (-5.3 to 3.5%)     | 419.83 (330.26-512.86)   | -50.9% (-59.7 to -40.9%) |
|              |              | Kuwait                       | 40.7% (35.9-45.4%) | 0.6% (-2.4 to 3.9%)      | 382.13 (311.41-464.04)   | -11.2% (-23.9 to 5.1%)   |
|              |              | Lebanon                      | 29.2% (24.5-33.6%) | -5.2% (-10.9 to 0.3%)    | 220.17 (158.48-284.52)   | -37.1% (-50.9 to -19.8%) |
|              |              | Libya                        | 32.3% (25.3-38.7%) | 1.4% (-10.1 to 12.3%)    | 507.76 (354.43-695.05)   | -20.2% (-38.7 to 5.5%)   |
|              |              | Morocco                      | 34% (29.5-38.5%)   | -2.3% (-9.6 to 4.6%)     | 767.32 (587.72-965.54)   | -19.1% (-37.3 to 1.3%)   |
|              |              | Palestine                    | 29.7% (23.7-35.4%) | -10.4% (-17.9 to -4.9%)  | 631.94 (486.13-784.98)   | -39.5% (-53.3 to -22.3%) |
|              |              | Oman                         | 35.2% (27.5-42.2%) | -11.8% (-21.4 to -1.8%)  | 662.78 (509.66-843.85)   | -46% (-59.3 to -25.6%)   |
|              |              | Qatar                        | 40.7% (34.8-45.5%) | -4.4% (-9.2 to 3.9%)     | 368.3 (286.92-481.18)    | -47.1% (-59.7 to -31.1%) |
|              |              | Saudi Arabia                 | 42.3% (37.6-46.5%) | -0.2% (-6.2 to 6.5%)     | 895.33 (692.05-1088.55)  | -29.2% (-47.8 to -3.3%)  |
|              |              | Syrian Arab Republic         | 32.1% (27.4-36.6%) | -2.4% (-8.7 to 4.4%)     | 648.78 (480.88-855.08)   | -41.6% (-57.1 to -19.5%) |
|              |              | Tunisia                      | 30.5% (24.6-36.3%) | -4.7% (-11 to 0.2%)      | 450.15 (323.15-608.26)   | -28.3% (-46.1 to -4.5%)  |

**Table S15** Burden of neurological conditions attributable to risk factors in North Africa and Middle East countries

| Risk factors | Causes                    | Locations                    | DALYs (95% UI)     |                         |                           |                          |
|--------------|---------------------------|------------------------------|--------------------|-------------------------|---------------------------|--------------------------|
|              |                           |                              | PAF (%)            | PAF change (%)          | Rate per 100,000          | Rate change (%)          |
|              |                           |                              | 2019               | From 1990 to 2019       | 2019                      | From 1990 to 2019        |
|              |                           | Türkiye                      | 29.2% (25.5–33%)   | -10.4% (-15.5 to -5.4%) | 339.71 (267.68–424.6)     | -31.5% (-50.3 to -12.7%) |
|              |                           | United Arab Emirates         | 37.5% (29–45.1%)   | 0.1% (-6.8 to 14.9%)    | 723.7 (511.43–1004.27)    | -45.9% (-60.1 to -27.4%) |
|              |                           | Yemen                        | 44% (37.8–49.8%)   | -15.1% (-26.9 to -5.1%) | 1217.98 (915.89–1584.47)  | -36% (-52.6 to -13.2%)   |
|              |                           | Afghanistan                  | 53.8% (50.1–57.6%) | -8% (-15.2 to -2.2%)    | 1883.75 (1350.17–2440.09) | -28.1% (-45.5 to -8.6%)  |
|              |                           | Sudan                        | 45.4% (39.9–49.7%) | -11.6% (-21.8 to -1.3%) | 1174.37 (841.06–1661.13)  | -40.8% (-54 to -23.4%)   |
|              | Ischaemic stroke          | Global                       | 33.1% (30.3–36.2%) | -2.4% (-8.3 to 3.4%)    | 264.37 (234.11–297.28)    | -30.2% (-38.4 to -22.5%) |
|              |                           | North Africa and Middle East | 36.4% (33.4–39.7%) | -2.3% (-6.4 to 1.9%)    | 430.66 (370.68–494.55)    | -10.9% (-24 to 2.5%)     |
|              |                           | Algeria                      | 29.7% (23.8–35.5%) | 1.7% (-3.9 to 7.3%)     | 378.62 (280.54–494.32)    | -23.4% (-39.1 to -4.1%)  |
|              |                           | Bahrain                      | 36.1% (31.3–40.4%) | -4.3% (-10.8 to 3%)     | 221.66 (178.08–283.43)    | -46.3% (-56.3 to -33.8%) |
|              |                           | Egypt                        | 42.1% (36.7–46.6%) | 14.7% (4.1 to 25.7%)    | 581.57 (429.89–792.27)    | 30.6% (-3.9 to 65.8%)    |
|              |                           | Iran                         | 35.9% (32.7–39.4%) | -4.7% (-7.2 to -2.5%)   | 353.43 (309.23–397.35)    | -45.4% (-51.1 to -37.7%) |
|              |                           | Iraq                         | 37.1% (31.9–42.1%) | -7.2% (-11.5 to -3.5%)  | 678.24 (531.62–835.76)    | -13.7% (-31.8 to 7%)     |
|              |                           | Jordan                       | 28% (23.9–32.2%)   | -0.4% (-4.4 to 4.6%)    | 303.86 (239.73–371.15)    | -46.5% (-56.3 to -36%)   |
|              |                           | Kuwait                       | 39.4% (34.7–44%)   | -0.4% (-3.5 to 3%)      | 254.53 (206.75–311.34)    | -12.3% (-24.8 to 4.1%)   |
|              |                           | Lebanon                      | 28.5% (23.9–32.7%) | -2% (-8.1 to 3.5%)      | 170.38 (123.32–218.36)    | -16.7% (-36 to 4%)       |
|              |                           | Libya                        | 31.9% (24.9–38.4%) | -1.2% (-10.9 to 6.5%)   | 358.62 (248.43–496.95)    | 9.9% (-14.6 to 43%)      |
|              |                           | Morocco                      | 32.9% (28.4–37.5%) | 0.5% (-7.1 to 7.5%)     | 528.55 (410.17–669.84)    | 19% (-9.6 to 47.8%)      |
|              |                           | Palestine                    | 28.9% (23–34.5%)   | -9.7% (-17.3 to -4.2%)  | 459.4 (352.19–572.97)     | -25.8% (-42.2 to -5.6%)  |
|              |                           | Oman                         | 34.6% (27–41.8%)   | -11.9% (-21 to -1.7%)   | 447 (336.09–565.09)       | -28.1% (-45.6 to -1.1%)  |
|              |                           | Qatar                        | 38.7% (33.3–43.6%) | -4.6% (-9.3 to 3.4%)    | 223.47 (175.4–292.25)     | -38.4% (-52.5 to -21.2%) |
|              |                           | Saudi Arabia                 | 40.3% (35.9–44.5%) | 1% (-5.4 to 8.1%)       | 524.19 (403.52–632.73)    | -16.6% (-37.7 to 9.1%)   |
|              |                           | Syrian Arab Republic         | 31.1% (26.4–35.6%) | -4.1% (-9.7 to 2.2%)    | 333.04 (251.19–436.24)    | -28.1% (-47.4 to -2.4%)  |
|              |                           | Tunisia                      | 29.5% (23.8–35.2%) | -2.1% (-7.9 to 2.3%)    | 321.4 (228.49–434.06)     | 1.8% (-25.2 to 34.1%)    |
|              |                           | Türkiye                      | 27.3% (23.8–31%)   | -10.3% (-15.5 to -5.4%) | 181.28 (143.75–226.3)     | -17.5% (-41.4 to 5.3%)   |
|              |                           | United Arab Emirates         | 36.3% (28–43.6%)   | 1.3% (-6.1 to 17.1%)    | 514.43 (364.95–692.57)    | -33% (-50 to -10.3%)     |
|              |                           | Yemen                        | 42.4% (36.6–48.1%) | -14% (-26.9 to -2.9%)   | 728.59 (552.57–980.97)    | 2.9% (-23.8 to 37.6%)    |
|              |                           | Afghanistan                  | 51.5% (47.4–55.6%) | -6.7% (-15.9 to 0.5%)   | 961.15 (701.67–1279.22)   | 18.7% (-9.6 to 51.7%)    |
|              |                           | Sudan                        | 44.3% (38.8–48.6%) | -10.5% (-22.7 to 0%)    | 750.75 (551.67–1085.17)   | -3.4% (-25.9 to 26.4%)   |
|              | Intracerebral haemorrhage | Global                       | 41.3% (38.3–44.5%) | -9.1% (-13.2 to -5.4%)  | 344.03 (304.68–381.87)    | -42.5% (-49.7 to -35.9%) |
|              |                           | North Africa and Middle East | 40% (36.9–43.3%)   | -2% (-8.2 to 7.1%)      | 219.39 (184.56–260.22)    | -52.7% (-60.4 to -41.9%) |
|              |                           | Algeria                      | 33.7% (27.3–40.1%) | -0.3% (-6.3 to 5.3%)    | 136.23 (98.53–180.02)     | -68% (-76 to -57.3%)     |
|              |                           | Bahrain                      | 41.1% (36.1–45.9%) | -4.5% (-10.8 to 2.7%)   | 108.74 (84.65–139.91)     | -65.8% (-73.8 to -54.6%) |
|              |                           | Egypt                        | 40.2% (34.3–45.9%) | 21.8% (5.1 to 47.6%)    | 258.96 (180.64–384.31)    | -50.6% (-65 to -30.8%)   |
|              |                           | Iran                         | 38.9% (35.5–42.4%) | -4.5% (-7.6 to -0.5%)   | 86.91 (77.86–96.47)       | -55.7% (-62.1 to -48.3%) |
|              |                           | Iraq                         | 41.4% (35.7–46.9%) | -5.2% (-9.9 to -0.5%)   | 424.02 (314.38–553.55)    | -33.6% (-51.1 to -11.5%) |
|              |                           | Jordan                       | 31.7% (27.1–36.1%) | -1.1% (-4.7 to 3.8%)    | 103.26 (80.28–128.46)     | -60.4% (-68.3 to -50.3%) |
|              |                           | Kuwait                       | 43.6% (38.4–48.6%) | 1.4% (-2 to 5.3%)       | 107.36 (83.54–134.6)      | -2.9% (-22.9 to 21.2%)   |
|              |                           | Lebanon                      | 32% (26.8–36.7%)   | -5.2% (-11.3 to 0.7%)   | 41.16 (28.88–58.74)       | -65.8% (-75.6 to -52.4%) |
|              |                           | Libya                        | 33.8% (26.3–40.3%) | 0.5% (-11 to 14.6%)     | 127.31 (84.43–180.08)     | -50.9% (-65 to -30.8%)   |
|              |                           | Morocco                      | 36.5% (31.8–41.3%) | -1.4% (-8.9 to 6%)      | 202.69 (148.84–264.84)    | -51.7% (-65.1 to -33.1%) |
|              |                           | Palestine                    | 32.1% (25.7–38.1%) | -8.2% (-15.8 to -2.8%)  | 156.28 (118.55–196.98)    | -60.3% (-70 to -46.9%)   |
|              |                           | Oman                         | 36.8% (28.7–44.4%) | -11.7% (-21.1 to -0.6%) | 185.54 (138.91–244.68)    | -64.6% (-73.6 to -49.8%) |
|              |                           | Qatar                        | 43.6% (37.3–48.6%) | -2.9% (-8.1 to 5.4%)    | 106.19 (80.18–142.64)     | -57.6% (-69.5 to -41.4%) |
|              |                           | Saudi Arabia                 | 45.5% (40.6–49.9%) | 0.7% (-5.5 to 6.9%)     | 348.16 (267.27–438.13)    | -40.9% (-58.1 to -12.8%) |
|              |                           | Syrian Arab Republic         | 34.5% (29.5–39.3%) | -4.1% (-9.9 to 2.5%)    | 289.52 (209.67–388.95)    | -50.6% (-64.3 to -29.6%) |
|              |                           | Tunisia                      | 33.3% (26.9–39.5%) | -3.2% (-9.6 to 2.6%)    | 107.27 (73.67–149.52)     | -57.9% (-70.6 to -38.2%) |
|              |                           | Türkiye                      | 31.4% (27.4–35.3%) | -8.6% (-14 to -2.9%)    | 125.36 (96.27–159)        | -42.3% (-59.5 to -24.6%) |



**Table S15** Burden of neurological conditions attributable to risk factors in North Africa and Middle East countries

| Risk factors            | Causes                   | Locations                    | DALYs (95% UI)     |                          |                           |                          |
|-------------------------|--------------------------|------------------------------|--------------------|--------------------------|---------------------------|--------------------------|
|                         |                          |                              | PAF (%)            | PAF change (%)           | Rate per 100,000          | Rate change (%)          |
|                         |                          |                              | 2019               | From 1990 to 2019        | 2019                      | From 1990 to 2019        |
|                         |                          | United Arab Emirates         | 41% (31·8–49%)     | 1·5% (-5·7 to 16·2%)     | 184·69 (120·42–289·87)    | -63·5% (-75·5 to -46%)   |
|                         |                          | Yemen                        | 46·8% (40·4–52·7%) | -13·1% (-24·5 to -3·3%)  | 414·43 (298·52–567·27)    | -59·8% (-71·3 to -42·6%) |
|                         |                          | Afghanistan                  | 56·7% (52·9–60·6%) | -6·1% (-12·8 to -0·8%)   | 792·08 (552·74–1058·88)   | -49·3% (-62·3 to -32·2%) |
|                         |                          | Sudan                        | 47·6% (42·1–52·4%) | -10·5% (-20·7 to 1·4%)   | 367·12 (242·27–520·5)     | -64·8% (-74·1 to -51·6%) |
|                         | Subarachnoid haemorrhage | Global                       | 37% (33·4–40·5%)   | -16·2% (-20·8 to -11·4%) | 50·49 (41·79–60·03)       | -61·7% (-67·8 to -45·5%) |
|                         |                          | North Africa and Middle East | 37·1% (33·5–40·8%) | 12·8% (0·2 to 36·4%)     | 34·96 (27·76–44·83)       | -58·2% (-69·6 to -33·8%) |
|                         |                          | Algeria                      | 33·9% (27·5–40·6%) | 2·8% (-4·6 to 11·9%)     | 26·1 (17·87–35·85)        | -63·7% (-74·9 to -41·9%) |
|                         |                          | Bahrain                      | 40·2% (35·4–45·1%) | 11·9% (0·3 to 28·3%)     | 25·26 (18·55–36·27)       | -53·1% (-68 to -31·7%)   |
|                         |                          | Egypt                        | 33% (25·4–41·7%)   | 60·6% (16·7 to 158·7%)   | 37·75 (25·22–54·94)       | -63·1% (-77·4 to -33·2%) |
|                         |                          | Iran                         | 39·1% (35·6–42·6%) | -2·2% (-6·4 to 1·9%)     | 21·35 (18·3–25·29)        | -56·7% (-68·9 to -33·8%) |
|                         |                          | Iraq                         | 41·3% (35·7–46·8%) | -0·7% (-7·8 to 7·8%)     | 29·81 (21·17–41·96)       | -64·3% (-77·2 to -41·6%) |
|                         |                          | Jordan                       | 32·7% (28·2–37·1%) | -0·6% (-5·2 to 5·1%)     | 12·71 (9·52–16·13)        | -50·1% (-64·2 to -27·2%) |
|                         |                          | Kuwait                       | 43·1% (38·4–47·7%) | 6·1% (1 to 13·7%)        | 20·24 (16·19–25·05)       | -30·9% (-44·6 to -5·3%)  |
|                         |                          | Lebanon                      | 32·3% (26·9–37·4%) | -2·7% (-10·1 to 4·9%)    | 8·63 (5·77–12·27)         | -65·3% (-79·7 to -42·3%) |
|                         |                          | Libya                        | 30·4% (23·5–37·3%) | 28·2% (-1·2 to 74%)      | 21·83 (14·11–33·17)       | -56·9% (-70·3 to -31·8%) |
|                         |                          | Morocco                      | 35·9% (31·2–40·9%) | 2·7% (-7·1 to 14·1%)     | 36·08 (24·21–54·22)       | -57·5% (-72·8 to -26·6%) |
|                         |                          | Palestine                    | 32·5% (26·1–38·1%) | -8·1% (-15·7 to -2%)     | 16·26 (12·24–21·14)       | -50·4% (-65·5 to -27·1%) |
|                         |                          | Oman                         | 33·8% (26·2–42·1%) | -0·6% (-15·9 to 22·8%)   | 30·24 (18·1–50·11)        | -62·6% (-77·8 to -27·6%) |
|                         |                          | Qatar                        | 46·2% (40·1–51·7%) | 1·4% (-5·3 to 10·6%)     | 38·64 (27·78–51·75)       | -53·6% (-72·6 to -24·5%) |
|                         |                          | Saudi Arabia                 | 46·4% (41·5–51·1%) | 2·3% (-4·8 to 10·5%)     | 22·98 (16·32–30·7)        | -51·4% (-72·2 to -18·4%) |
|                         |                          | Syrian Arab Republic         | 24% (19·6–28·8%)   | 23·2% (1·2 to 52·8%)     | 26·21 (18·62–35·78)       | -57·6% (-71·8 to -33·6%) |
|                         |                          | Tunisia                      | 33·3% (27·39–6%)   | 1% (-7·9 to 11·9%)       | 21·48 (14·3–30·37)        | -62·4% (-77·2 to -35·4%) |
|                         |                          | Türkiye                      | 32·8% (28·6–36·9%) | -6·7% (-12·7 to -1%)     | 33·07 (24·74–42·34)       | -43·9% (-64·9 to -3·1%)  |
|                         |                          | United Arab Emirates         | 40·4% (31·7–48·3%) | 10·2% (-1·3 to 37·2%)    | 24·58 (12·51–40·77)       | -60·7% (-76·1 to -32·7%) |
|                         |                          | Yemen                        | 45·5% (38·9–51·9%) | -10·7% (-23·1 to 1·2%)   | 74·96 (38·58–124·57)      | -54·5% (-69·2 to -26·9%) |
|                         |                          | Afghanistan                  | 55·6% (51·4–60·1%) | -5·5% (-14·1 to 1·7%)    | 130·52 (41·71–225·63)     | -46·9% (-63·1 to -17%)   |
|                         |                          | Sudan                        | 45·9% (40·3–51%)   | -5·5% (-19·1 to 13·7%)   | 56·49 (31·52–97·62)       | -66% (-78·2 to -36·2%)   |
| Metabolic risk factors† | Stroke                   | Global                       | 70·3% (63·8–76·5%) | 8·4% (5·4 to 12%)        | 1242·98 (1093·17–1376·96) | -29·8% (-35·7 to -23·9%) |
|                         |                          | North Africa and Middle East | 73·9% (67·6–80·1%) | 18·3% (12·1 to 26%)      | 1349·66 (1156·04–1552·32) | -19·6% (-29·1 to -6·3%)  |
|                         |                          | Algeria                      | 73·3% (65·4–82·2%) | 8·7% (2·1 to 17·5%)      | 1287·26 (1028·15–1590)    | -39·7% (-52·4 to -24·6%) |
|                         |                          | Bahrain                      | 75·3% (67·7–83·1%) | 2·6% (-2·6 to 8·1%)      | 709·2 (584–883·92)        | -51·3% (-60·6 to -40·6%) |
|                         |                          | Egypt                        | 70·8% (63·6–77·6%) | 62·6% (36·3 to 89·9%)    | 1516·31 (1124·22–2070·77) | 5·2% (-22 to 37·8%)      |
|                         |                          | Iran                         | 72·3% (64·4–80·5%) | 11% (7·1 to 16·7%)       | 912·16 (796·49–1035·61)   | -39·7% (-46·2 to -30·1%) |
|                         |                          | Iraq                         | 80·4% (74·4–85·4%) | 8·8% (4 to 14·8%)        | 2349·44 (1872·37–2819·46) | -12·3% (-31 to 9·5%)     |
|                         |                          | Jordan                       | 76·3% (69–84·1%)   | 5·2% (0·1 to 11·7%)      | 1104·15 (914·04–1305·62)  | -47·6% (-56·9 to -37·3%) |
|                         |                          | Kuwait                       | 75·8% (68·9–82·5%) | 3·1% (-0·9 to 7·5%)      | 711·1 (587·48–850·4)      | -8·9% (-22·2 to 7%)      |
|                         |                          | Lebanon                      | 75·9% (68·2–84·5%) | 12·7% (5·7 to 21·1%)     | 571·61 (422·99–723·84)    | -25·3% (-41·5 to -6%)    |
|                         |                          | Libya                        | 77·2% (70·3–83·6%) | 19·6% (9·2 to 32·5%)     | 1211·99 (935·48–1569·05)  | -5·9% (-25·8 to 22·1%)   |
|                         |                          | Morocco                      | 79·2% (72·4–85·7%) | 8·8% (2·8 to 15·6%)      | 1788·38 (1418·9–2171·68)  | -9·9% (-28·4 to 11·7%)   |
|                         |                          | Palestine                    | 72·4% (64·4–82%)   | 7·4% (1 to 14·7%)        | 1541·39 (1292·41–1842·47) | -27·5% (-43·2 to -8·1%)  |
|                         |                          | Oman                         | 74·9% (67·3–82·9%) | 28·7% (17·4 to 41·7%)    | 1410·95 (1186·57–1652·53) | -21·1% (-38·9 to 6·1%)   |
|                         |                          | Qatar                        | 74·2% (66·2–81·9%) | 2% (-3·3 to 7·4%)        | 671·12 (536·45–855·68)    | -43·6% (-56·7 to -27·6%) |
|                         |                          | Saudi Arabia                 | 77·8% (71·5–83·8%) | 11·9% (6·2 to 19·3%)     | 1645·92 (1293·63–1954·58) | -20·7% (-40·7 to 6·7%)   |

**Table S15** Burden of neurological conditions attributable to risk factors in North Africa and Middle East countries

| Risk factors | Causes                    | Locations                    | DALYs (95% UI)     |                        |                           |                          |
|--------------|---------------------------|------------------------------|--------------------|------------------------|---------------------------|--------------------------|
|              |                           |                              | PAF (%)            | PAF change (%)         | Rate per 100,000          | Rate change (%)          |
|              |                           |                              | 2019               | From 1990 to 2019      | 2019                      | From 1990 to 2019        |
|              |                           | Syrian Arab Republic         | 72.5% (66–78.9%)   | 17.2% (8.7 to 27.7%)   | 1464.84 (1126.86–1894.86) | -29.9% (-47.9 to -2.6%)  |
|              |                           | Tunisia                      | 73.8% (65.7–82.3%) | 12.4% (5.5 to 20.8%)   | 1091.13 (811.65–1428.02)  | -15.4% (-38.1 to 11.9%)  |
|              |                           | Türkiye                      | 72.8% (65.6–79.5%) | 7.6% (2.3 to 14.1%)    | 846.72 (678.85–1036.91)   | -17.8% (-39.2 to 2.7%)   |
|              |                           | United Arab Emirates         | 78% (71.2–84.5%)   | 0.2% (-3.4 to 4.1%)    | 1503.11 (1159.12–1956.04) | -45.9% (-59 to -30.1%)   |
|              |                           | Yemen                        | 68.2% (60.9–75.9%) | 15.3% (4.9 to 27.4%)   | 1888.2 (1417.64–2465.59)  | -13.1% (-33.4 to 16.9%)  |
|              |                           | Afghanistan                  | 72.9% (65.5–79.7%) | 12.2% (4 to 23.3%)     | 2551.6 (1806.91–3399.42)  | -12.2% (-32.7 to 12.5%)  |
|              |                           | Sudan                        | 78.3% (71.8–84.3%) | 17.6% (9.5 to 29.2%)   | 2024.05 (1510.29–2822.94) | -21.3% (-37.1 to -0.5%)  |
|              | Ischaemic stroke          | Global                       | 70.4% (61.2–79.5%) | 2.9% (0.2 to 6.1%)     | 561.99 (478.27–646.59)    | -26.4% (-32.6 to -20.2%) |
|              |                           | North Africa and Middle East | 75.1% (66.7–84.3%) | 12.7% (8 to 18.8%)     | 888.84 (753.9–1040.54)    | 2.8% (-11.2 to 18%)      |
|              |                           | Algeria                      | 73.4% (63.5–85.2%) | 8.7% (1.5 to 18.1%)    | 936.37 (732.58–1185.69)   | -18.1% (-35 to 2.2%)     |
|              |                           | Bahrain                      | 74.9% (64.6–86.1%) | 0.7% (-4.9 to 6.4%)    | 459.76 (367.65–584.07)    | -43.5% (-54 to -32%)     |
|              |                           | Egypt                        | 74.6% (66.7–83.1%) | 36.2% (21.7 to 56.1%)  | 1031.9 (775.36–1392.69)   | 55.3% (14.6 to 100.9%)   |
|              |                           | Iran                         | 72.9% (63.7–83.4%) | 9.2% (5.4 to 16%)      | 717.37 (611.56–838.33)    | -37.5% (-44.7 to -27.8%) |
|              |                           | Iraq                         | 80% (72.1–87.7%)   | 7.6% (2.9 to 13.6%)    | 1464.3 (1166.94–1744.37)  | 0.1% (-20.1 to 24%)      |
|              |                           | Jordan                       | 76.1% (66.8–86%)   | 4.8% (-0.3 to 11%)     | 824.1 (669.81–982.21)     | -43.7% (-54.1 to -33.1%) |
|              |                           | Kuwait                       | 76.1% (67.2–85.4%) | 1.5% (-2.8 to 5.8%)    | 491.38 (396.75–587.54)    | -10.7% (-23.9 to 4.4%)   |
|              |                           | Lebanon                      | 75.8% (66.5–86.6%) | 11.6% (4.7 to 21.1%)   | 453.35 (337.91–572.53)    | -5.3% (-27 to 18.9%)     |
|              |                           | Libya                        | 78.5% (70.3–87%)   | 11.6% (5.4 to 20.6%)   | 881.06 (670.1–1145.34)    | 24% (-3.1 to 59.9%)      |
|              |                           | Morocco                      | 79.3% (70.6–88.3%) | 8.2% (2.5 to 15.6%)    | 1272.24 (1005.64–1555.81) | 28.2% (-0.4 to 57.7%)    |
|              |                           | Palestine                    | 72.5% (62.7–85.5%) | 6.3% (0 to 13.7%)      | 1153.85 (947.95–1418.5)   | -12.6% (-30.3 to 10.4%)  |
|              |                           | Oman                         | 75.6% (65.8–87.2%) | 23.5% (13 to 36.3%)    | 976.99 (791.75–1175.46)   | 0.9% (-21.6 to 35.6%)    |
|              |                           | Qatar                        | 73.4% (63–84.8%)   | -0.1% (-5.9 to 6.1%)   | 423.7 (331.27–545.4)      | -35.5% (-50.1 to -18.8%) |
|              |                           | Saudi Arabia                 | 77% (68.8–85.5%)   | 12.3% (5.4 to 20.8%)   | 1001.63 (772–1200.64)     | -7.2% (-30.3 to 21.9%)   |
|              |                           | Syrian Arab Republic         | 74.7% (65.6–85.7%) | 11% (4.1 to 20.9%)     | 799.96 (613.77–1033.8)    | -16.9% (-38.9 to 11.9%)  |
|              |                           | Tunisia                      | 73.8% (64.1–85.4%) | 10.3% (4.2 to 18.7%)   | 804.76 (592.3–1053.88)    | 14.9% (-14.8 to 50.3%)   |
|              |                           | Türkiye                      | 72.1% (62.5–82.5%) | 4.4% (-1 to 11.6%)     | 478.13 (378.61–595.27)    | -3.9% (-30.1 to 20.2%)   |
|              |                           | United Arab Emirates         | 77.9% (69.8–86.2%) | -0.1% (-4 to 3.9%)     | 1102.48 (852.96–1370.25)  | -34% (-49 to -15.8%)     |
|              |                           | Yemen                        | 69.6% (60.3–79.6%) | 13.4% (4.4 to 25.4%)   | 1195.08 (902.29–1589.46)  | 35.8% (5.6 to 77.2%)     |
|              |                           | Afghanistan                  | 73.9% (64.9–84.1%) | 11% (3.5 to 20.1%)     | 1378.02 (992.69–1835.48)  | 41.5% (9.4 to 78.5%)     |
|              |                           | Sudan                        | 78.8% (70.6–87.6%) | 17.2% (9.4 to 27.8%)   | 1333.9 (987.59–1858.15)   | 26.6% (2.1 to 59.6%)     |
|              | Intracerebral haemorrhage | Global                       | 70.8% (63–77.4%)   | 11.6% (7.8 to 16.2%)   | 589.88 (516.96–664.45)    | -29.3% (-37.6 to -22.4%) |
|              |                           | North Africa and Middle East | 72.9% (66–78.6%)   | 19% (11.2 to 31.9%)    | 399.93 (339.15–470.05)    | -42.6% (-51.5 to -29.4%) |
|              |                           | Algeria                      | 73.7% (65.9–80.7%) | 8.1% (1.5 to 16.4%)    | 297.48 (228.62–380.62)    | -65.3% (-73.8 to -53.7%) |
|              |                           | Bahrain                      | 77.7% (70.2–84.4%) | 3.1% (-2.1 to 9.1%)    | 205.75 (163.36–260.33)    | -63.1% (-71.4 to -52.4%) |
|              |                           | Egypt                        | 66.2% (57.8–74.5%) | 57.2% (29.1 to 100.5%) | 426.46 (293.04–625.41)    | -36.1% (-56.1 to -8.2%)  |
|              |                           | Iran                         | 70.7% (63.6–77.2%) | 16% (10.3 to 24.4%)    | 157.87 (140.96–174.54)    | -46.3% (-54.6 to -35.3%) |
|              |                           | Iraq                         | 81.1% (74.5–86.1%) | 9.8% (4.5 to 17.2%)    | 829.66 (638.32–1055.76)   | -23.1% (-43.1 to 2.2%)   |
|              |                           | Jordan                       | 77.1% (69.8–83.5%) | 6.4% (0.7 to 13.7%)    | 251.05 (201.82–302.52)    | -57.5% (-66 to -47.1%)   |

**Table S15** Burden of neurological conditions attributable to risk factors in North Africa and Middle East countries

| Risk factors | Causes                   | Locations                    | DALYs (95% UI)     |                         |                          |                          |
|--------------|--------------------------|------------------------------|--------------------|-------------------------|--------------------------|--------------------------|
|              |                          |                              | PAF (%)            | PAF change (%)          | Rate per 100,000         | Rate change (%)          |
|              |                          |                              | 2019               | From 1990 to 2019       | 2019                     | From 1990 to 2019        |
|              |                          | Kuwait                       | 75.6% (68.1–81.7%) | 5.1% (0.8 to 10.1%)     | 186.14 (147.2–226.56)    | 0.6% (-20.7 to 25.1%)    |
|              |                          | Lebanon                      | 76.5% (68.9–82.7%) | 13.3% (6.6 to 22.6%)    | 98.28 (71.52–135.54)     | -59.2% (-70.5 to -43%)   |
|              |                          | Libya                        | 75.6% (69.3–81.6%) | 18.2% (6.3 to 36.6%)    | 284.87 (210.43–393.2)    | -42.3% (-57.6 to -19.4%) |
|              |                          | Morocco                      | 79.5% (72.2–85.3%) | 8.2% (1.8 to 15.9%)     | 440.68 (328.7–565.32)    | -47% (-61.8 to -26.8%)   |
|              |                          | Palestine                    | 72.5% (64.1–79.8%) | 9.1% (2.4 to 16.9%)     | 353.51 (286.81–428.42)   | -52.8% (-64.3 to -37%)   |
|              |                          | Oman                         | 74.9% (67.9–81.2%) | 30.3% (17.8 to 47.1%)   | 377.96 (317.53–476.95)   | -47.8% (-61.3 to -26.3%) |
|              |                          | Qatar                        | 76% (68.3–82.7%)   | 4.4% (-1.1 to 10.6%)    | 185.29 (143.08–244.55)   | -54.4% (-67.2 to -38.7%) |
|              |                          | Saudi Arabia                 | 79.4% (72–85.2%)   | 11.8% (5.9 to 19.8%)    | 607.28 (466.3–753.34)    | -34.4% (-53.2 to -2.7%)  |
|              |                          | Syrian Arab Republic         | 73.6% (65.7–80.3%) | 14.7% (6.2 to 25.3%)    | 617.72 (460.69–819.03)   | -40.9% (-58.1 to -16.2%) |
|              |                          | Tunisia                      | 74.5% (66.6–81.4%) | 13.5% (5.8 to 23%)      | 240.53 (172.13–323.69)   | -50.7% (-65.9 to -27.6%) |
|              |                          | Türkiye                      | 74.3% (66.3–80.8%) | 10.9% (4.1 to 19.7%)    | 296.38 (233.88–366.17)   | -30.1% (-50.8 to -9.8%)  |
|              |                          | United Arab Emirates         | 79% (72.1–84.7%)   | -0.5% (-4.7 to 4%)      | 356.01 (248.01–532.88)   | -64.3% (-75.6 to -49%)   |
|              |                          | Yemen                        | 66.8% (58.1–74.3%) | 13.8% (3.7 to 27.7%)    | 591.25 (422.61–800.17)   | -47.3% (-61.8 to -26.2%) |
|              |                          | Afghanistan                  | 72.4% (64–80%)     | 11.7% (2.8 to 23.2%)    | 1012.92 (691.22–1384.65) | -39.7% (-55.2 to -19.4%) |
|              |                          | Sudan                        | 78% (70.6–83.6%)   | 16% (7.2 to 31.4%)      | 600.91 (408.26–849.53)   | -54.4% (-65.9 to -37.6%) |
|              | Subarachnoid haemorrhage | Global                       | 66.8% (58.6–73.9%) | 15.2% (9.9 to 21.8%)    | 91.11 (76.01–107.33)     | -47.2% (-54.9 to -29.6%) |
|              |                          | North Africa and Middle East | 64.7% (57.3–71.4%) | 39.2% (19.4 to 78%)     | 60.89 (49.02–76.6)       | -48.4% (-63.2 to -19.4%) |
|              |                          | Algeria                      | 69.5% (60.7–77.2%) | 12.3% (1.9 to 25.4%)    | 53.41 (39.29–71.65)      | -60.3% (-72.5 to -37.4%) |
|              |                          | Bahrain                      | 69.6% (62.6–76.2%) | 22.9% (9.5 to 39.8%)    | 43.69 (32.78–62.56)      | -48.5% (-65.5 to -25.5%) |
|              |                          | Egypt                        | 50.6% (38.1–64.2%) | 129.2% (53.5 to 336.1%) | 57.96 (37.85–85.36)      | -47.1% (-69.4 to -2.6%)  |
|              |                          | Iran                         | 67.6% (59.8–74.8%) | 14.5% (8.3 to 23.3%)    | 36.92 (31.19–44.28)      | -49.3% (-64.1 to -21.7%) |
|              |                          | Iraq                         | 76.9% (69.2–82.7%) | 13.6% (4.9 to 25.4%)    | 55.47 (40.85–77.53)      | -59.2% (-73.6 to -33.4%) |
|              |                          | Jordan                       | 74.5% (66.9–81.3%) | 7.7% (1.2 to 16.5%)     | 29 (22.43–35.79)         | -45.9% (-60.9 to -21.4%) |
|              |                          | Kuwait                       | 71.5% (63.8–77.7%) | 13.8% (6.4 to 23.2%)    | 33.57 (26.77–40.92)      | -25.9% (-41.4 to 0.3%)   |
|              |                          | Lebanon                      | 74.8% (66.6–81.6%) | 21.7% (11.5 to 36%)     | 19.97 (13.71–28.13)      | -56.6% (-74.5 to -29.1%) |
|              |                          | Libya                        | 64.3% (53.9–74.4%) | 62.1% (18.5 to 135.6%)  | 46.06 (32.29–67.42)      | -45.4% (-63 to -14.9%)   |
|              |                          | Morocco                      | 75.3% (66.6–82.2%) | 13.7% (2.7 to 28.3%)    | 75.46 (53.05–109.88)     | -53.1% (-69.7 to -18.6%) |
|              |                          | Palestine                    | 67.9% (58.8–75.4%) | 8.4% (0.3 to 18.5%)     | 34.04 (26.94–41.72)      | -41.5% (-58.9 to -13.4%) |
|              |                          | Oman                         | 62.4% (53.5–72.2%) | 53% (27.1 to 90.8%)     | 55.99 (34.29–87.8)       | -42.2% (-65.6 to 6.2%)   |
|              |                          | Qatar                        | 74.3% (66.7–81.1%) | 8% (0 to 17.2%)         | 62.13 (45.08–83.92)      | -50.6% (-70.8 to -19.8%) |
|              |                          | Saudi Arabia                 | 74.8% (66.1–81.6%) | 14.1% (5.6 to 24.1%)    | 37.01 (26.46–49.99)      | -45.8% (-69.2 to -9.4%)  |
|              |                          | Syrian Arab Republic         | 43.1% (35.5–51%)   | 64.2% (23.1 to 129.8%)  | 47.17 (34.12–63.64)      | -43.4% (-64.3 to -5.6%)  |
|              |                          | Tunisia                      | 71% (62.3–78.4%)   | 21.9% (8.9 to 40.4%)    | 45.84 (31.89–63.9)       | -54.6% (-72.4 to -21.7%) |
|              |                          | Türkiye                      | 71.5% (62.7–78.6%) | 11.1% (3.6 to 20.8%)    | 72.21 (55.09–90.77)      | -33.2% (-57.9 to 17.7%)  |
|              |                          | United Arab Emirates         | 73.2% (65.5–80.4%) | 12.1% (1.1 to 25.4%)    | 44.61 (22.65–72.78)      | -60.1% (-75.7 to -34.9%) |
|              |                          | Yemen                        | 62% (52.9–70.6%)   | 18.5% (3.6 to 37.7%)    | 101.87 (52.51–171.79)    | -39.7% (-59.6 to -2.4%)  |
|              |                          | Afghanistan                  | 68.4% (58.7–76.8%) | 13.4% (1.2 to 28.7%)    | 160.66 (52.69–279.88)    | -36.2% (-56.2 to -0.4%)  |
|              |                          | Sudan                        | 72.6% (63.4–80.1%) | 23.5% (6.1 to 53.3%)    | 89.24 (51.25–150.08)     | -55.6% (-71.1 to -17%)   |
|              | Neurological disorders*  | Global                       | 5.7% (1.8–12.7%)   | 31.8% (22.2 to 47.4%)   | 70.7 (20.77–179.6)       | 30.1% (20.9 to 45.9%)    |
|              |                          | North Africa and Middle East | 8.2% (2.8–17.4%)   | 55.3% (38.6 to 85%)     | 111.71 (34.19–279.74)    | 48.4% (31.4 to 80.4%)    |
|              |                          | Algeria                      | 9% (3–19.6%)       | 68.8% (40.2 to 128.6%)  | 121.85 (36.44–312.01)    | 52.9% (27 to 102.6%)     |
|              |                          | Bahrain                      | 11.9% (4.2–24.9%)  | 40.9% (16.9 to 79.6%)   | 163.81 (51.36–416.76)    | 28.5% (9.2 to 56%)       |
|              |                          | Egypt                        | 7.8% (2.4–16.9%)   | 53.3% (19.4 to 108.5%)  | 101.94 (30.77–248.87)    | 54.1% (20.1 to 113.2%)   |
|              |                          | Iran                         | 7.6% (2.6–16.2%)   | 71.4% (47.4 to 114.5%)  | 104.1 (33.44–264.68)     | 63.4% (40.8 to 114.3%)   |
|              |                          | Iraq                         | 9.2% (3–20%)       | 31% (9.8 to 64.3%)      | 120.55 (35.98–302.46)    | 28.3% (6.9 to 60.7%)     |
|              |                          | Jordan                       | 10.1% (3.4–21.1%)  | 38.4% (15 to 75.2%)     | 127.07 (40.58–314.52)    | 30.8% (10.5 to 64.5%)    |
|              |                          | Kuwait                       | 11.7% (4.1–24.2%)  | 33.4% (11.4 to 67.9%)   | 148.04 (49.02–360.41)    | 26.5% (10.7 to 56.2%)    |
|              |                          | Lebanon                      | 9.4% (3.2–20%)     | 46.1% (22.1 to 86.9%)   | 124.63 (37.96–311.91)    | 40.3% (18.9 to 92%)      |
|              |                          | Libya                        | 10.3% (3.5–21.9%)  | 41.6% (20.2 to 76%)     | 140.67 (41.93–351.92)    | 37.2% (13.7 to 72.3%)    |
|              |                          | Morocco                      | 8% (2.6–17.4%)     | 61.7% (32.4 to 113.8%)  | 106.29 (30.86–279.11)    | 65% (37.8 to 115.9%)     |

**Table S15** Burden of neurological conditions attributable to risk factors in North Africa and Middle East countries

| Risk factors                | Causes                                  | Locations                    | DALYs (95% UI)     |                          |                       |                          |
|-----------------------------|-----------------------------------------|------------------------------|--------------------|--------------------------|-----------------------|--------------------------|
|                             |                                         |                              | PAF (%)            | PAF change (%)           | Rate per 100,000      | Rate change (%)          |
|                             |                                         |                              | 2019               | From 1990 to 2019        | 2019                  | From 1990 to 2019        |
|                             |                                         | Palestine                    | 7.6% (2.3–17.1%)   | 54.4% (26.8 to 101.7%)   | 103.49 (29.37–273.02) | 45.8% (19.5 to 93.1%)    |
|                             |                                         | Oman                         | 10% (3.5–21.4%)    | 98.6% (52.9 to 215.4%)   | 133.87 (39.27–348.07) | 100.6% (55.5 to 222.5%)  |
|                             |                                         | Qatar                        | 13.7% (4.8–28.4%)  | 44.3% (10.2 to 104.9%)   | 184.71 (58.75–476.59) | 41.8% (7.2 to 96.3%)     |
|                             |                                         | Saudi Arabia                 | 10.2% (3.7–21.5%)  | 58.2% (27.2 to 118.2%)   | 144.44 (44.81–358.41) | 58.3% (28.7 to 123.6%)   |
|                             |                                         | Syrian Arab Republic         | 8.6% (2.8–18.3%)   | 40.8% (16.1 to 80.8%)    | 111.67 (32.27–291.85) | 43.3% (15.2 to 92%)      |
|                             |                                         | Tunisia                      | 9.3% (3.2–20%)     | 51.6% (27.7 to 93.3%)    | 121.9 (36.09–303.11)  | 47.8% (20.1 to 99.6%)    |
|                             |                                         | Türkiye                      | 8% (2.8–17%)       | 48.8% (24.3 to 89.2%)    | 117.57 (36.08–290.36) | 34.5% (13.2 to 67.1%)    |
|                             |                                         | United Arab Emirates         | 10.3% (3.5–21.8%)  | 42.5% (10.8 to 93.2%)    | 146.98 (48.82–377.67) | 32.6% (8.4 to 77.1%)     |
|                             |                                         | Yemen                        | 4.8% (1.3–11.5%)   | 61.9% (31.3 to 122.2%)   | 62.61 (16.83–171.33)  | 57.8% (28.2 to 116.2%)   |
|                             |                                         | Afghanistan                  | 7% (2.1–15.7%)     | 79.3% (48.3 to 148.3%)   | 104.97 (28.6–292.15)  | 60.3% (33.5 to 114.4%)   |
|                             |                                         | Sudan                        | 7.3% (2.3–16.4%)   | 100.2% (62.1 to 187%)    | 96.77 (29.85–247.66)  | 84.9% (50.9 to 163.6%)   |
|                             | Alzheimer's disease and other dementias | Global                       | 20.8% (9.3–35.5%)  | 25.3% (16.9 to 38.9%)    | 70.7 (20.77–179.6)    | 30.1% (20.9 to 45.9%)    |
|                             |                                         | North Africa and Middle East | 28.8% (14.7–45.8%) | 50.2% (35.7 to 76.7%)    | 111.71 (34.19–279.74) | 48.4% (31.4 to 80.4%)    |
|                             |                                         | Algeria                      | 30.3% (14.8–48.8%) | 60.9% (41.4 to 109.7%)   | 121.85 (36.44–312.01) | 52.9% (27 to 102.6%)     |
|                             |                                         | Bahrain                      | 40.5% (20.9–61.4%) | 33.7% (20.8 to 54.9%)    | 163.81 (51.36–416.76) | 28.5% (9.2 to 56%)       |
|                             |                                         | Egypt                        | 28.1% (13.7–44.9%) | 53.9% (25.2 to 98.4%)    | 101.94 (30.77–248.87) | 54.1% (20.1 to 113.2%)   |
|                             |                                         | Iran                         | 26.9% (13.2–43.1%) | 63.7% (44.4 to 100.8%)   | 104.1 (33.44–264.68)  | 63.4% (40.8 to 114.3%)   |
|                             |                                         | Iraq                         | 31.5% (15.5–50.1%) | 26.1% (9.1 to 50.2%)     | 120.55 (35.98–302.46) | 28.3% (6.9 to 60.7%)     |
|                             |                                         | Jordan                       | 34.3% (17.8–52.5%) | 37.1% (23.1 to 65%)      | 127.07 (40.58–314.52) | 30.8% (10.5 to 64.5%)    |
|                             |                                         | Kuwait                       | 38.2% (19.5–57.6%) | 30% (16.7 to 54.2%)      | 148.04 (49.02–360.41) | 26.5% (10.7 to 56.2%)    |
|                             |                                         | Lebanon                      | 31.5% (15.7–50.1%) | 43.8% (29.8 to 71.5%)    | 124.63 (37.96–311.91) | 40.3% (18.9 to 92%)      |
|                             |                                         | Libya                        | 33.9% (17.2–52.7%) | 43.1% (28.1 to 66.4%)    | 140.67 (41.93–351.92) | 37.2% (13.7 to 72.3%)    |
|                             |                                         | Morocco                      | 27.5% (13.1–44.6%) | 64.5% (43.6 to 110.4%)   | 106.29 (30.86–279.11) | 65% (37.8 to 115.9%)     |
|                             |                                         | Palestine                    | 26.6% (11.3–44.9%) | 52.6% (33 to 91.1%)      | 103.49 (29.37–273.02) | 45.8% (19.5 to 93.1%)    |
|                             |                                         | Oman                         | 31.6% (16.4–49.7%) | 107.4% (67.5 to 219.5%)  | 133.87 (39.27–348.07) | 100.6% (55.5 to 222.5%)  |
|                             |                                         | Qatar                        | 45.3% (22.3–66.2%) | 37.1% (7.5 to 84%)       | 184.71 (58.75–476.59) | 41.8% (7.2 to 96.3%)     |
|                             |                                         | Saudi Arabia                 | 37% (19.4–56.2%)   | 61.7% (41.1 to 108.1%)   | 144.44 (44.81–358.41) | 58.3% (28.7 to 123.6%)   |
|                             |                                         | Syrian Arab Republic         | 28.5% (13.7–46.2%) | 39.1% (22.9 to 67%)      | 111.67 (32.27–291.85) | 43.3% (15.2 to 92%)      |
|                             |                                         | Tunisia                      | 30.4% (14.6–48.7%) | 51.2% (35.8 to 82.2%)    | 121.9 (36.09–303.11)  | 47.8% (20.1 to 99.6%)    |
|                             |                                         | Türkiye                      | 29.6% (15.2–46.8%) | 37.3% (23.5 to 61.8%)    | 117.57 (36.08–290.36) | 34.5% (13.2 to 67.1%)    |
|                             |                                         | United Arab Emirates         | 40% (20.1–60%)     | 40.2% (21.3 to 76.5%)    | 146.98 (48.82–377.67) | 32.6% (8.4 to 77.1%)     |
|                             |                                         | Yemen                        | 16.3% (6.2–29.7%)  | 58.4% (33.8 to 108.8%)   | 62.61 (16.83–171.33)  | 57.8% (28.2 to 116.2%)   |
|                             |                                         | Afghanistan                  | 24.2% (10.5–41%)   | 66.6% (45.5 to 118.1%)   | 104.97 (28.6–292.15)  | 60.3% (33.5 to 114.4%)   |
|                             |                                         | Sudan                        | 26.4% (12.3–43.3%) | 92.6% (62.8 to 167.5%)   | 96.77 (29.85–247.66)  | 84.9% (50.9 to 163.6%)   |
| <b>Level 2 risk factors</b> |                                         |                              |                    |                          |                       |                          |
| Air pollution               | Meningitis                              | Global                       | 2% (1.7–2.2%)      | 7.5% (-7.8 to 24.1%)     | 4.62 (3.65–5.97)      | -53.9% (-63.3 to -41.2%) |
|                             |                                         | North Africa and Middle East | 1.6% (1.2–2.2%)    | -10.2% (-39.3 to 27.6%)  | 1.11 (0.76–1.62)      | -78.3% (-86.3 to -65.8%) |
|                             |                                         | Algeria                      | 0.8% (0.3–1.5%)    | 10.5% (-67.9 to 390.3%)  | 0.3 (0.1–0.61)        | -78% (-94 to -3.9%)      |
|                             |                                         | Bahrain                      | 0.4% (0.2–0.7%)    | -56.1% (-82 to 7.8%)     | 0.07 (0.04–0.12)      | -88.8% (-95.5 to -71.5%) |
|                             |                                         | Egypt                        | 2.2% (1.4–1%)      | -33.8% (-73 to 42%)      | 1.21 (0.49–2.46)      | -83.7% (-94.2 to -63.3%) |
|                             |                                         | Iran                         | 0.8% (0.6–1%)      | -29.5% (-51.9 to -2.2%)  | 0.3 (0.2–0.41)        | -85.4% (-91.3 to -76.8%) |
|                             |                                         | Iraq                         | 1.6% (0.9–2.7%)    | -26.9% (-65.7 to 58.5%)  | 1.09 (0.56–1.86)      | -85.4% (-94 to -65.4%)   |
|                             |                                         | Jordan                       | 0.8% (0.3–1.5%)    | -7.9% (-67.5 to 198.9%)  | 0.42 (0.17–0.85)      | -59.9% (-87.5 to 36.2%)  |
|                             |                                         | Kuwait                       | 1.4% (0.8–2.3%)    | 2.1% (-49.9 to 94.2%)    | 0.29 (0.14–0.48)      | -62.2% (-81.8 to -26.4%) |
|                             |                                         | Lebanon                      | 0.4% (0.1–1%)      | -53.1% (-89.1 to 97.6%)  | 0.13 (0.04–0.31)      | -85.2% (-96.5 to -37.5%) |
|                             |                                         | Libya                        | 0.4% (0.2–0.7%)    | -70.3% (-89 to -20.9%)   | 0.14 (0.06–0.28)      | -91% (-96.9 to -75.8%)   |
|                             |                                         | Morocco                      | 1.6% (0.7–3.1%)    | -20.2% (-73.3 to 140.4%) | 1.13 (0.44–2.29)      | -85.6% (-95.6 to -54.2%) |
|                             |                                         | Palestine                    | 0.6% (0.2–1.1%)    | -33.9% (-77.3 to 102%)   | 0.24 (0.08–0.46)      | -88.4% (-96 to -66%)     |
|                             |                                         | Oman                         | 0.8% (0.3–1.6%)    | -40% (-77.3 to 36.6%)    | 0.2 (0.07–0.41)       | -84.3% (-94.5 to -60.3%) |
|                             |                                         | Qatar                        | 0.8% (0.5–1.4%)    | -44.1% (-73.9 to 13.7%)  | 0.21 (0.12–0.35)      | -85% (-93.1 to -67.7%)   |

**Table S15** Burden of neurological conditions attributable to risk factors in North Africa and Middle East countries

| Risk factors | Causes                       | Locations                    | DALYs (95% UI)           |                          |                          |                          |
|--------------|------------------------------|------------------------------|--------------------------|--------------------------|--------------------------|--------------------------|
|              |                              |                              | PAF (%)                  | PAF change (%)           | Rate per 100,000         | Rate change (%)          |
|              |                              |                              | 2019                     | From 1990 to 2019        | 2019                     | From 1990 to 2019        |
| Encephalitis |                              | Saudi Arabia                 | 0.1% (0.0-0.2%)          | -62.6% (-87.4 to -0.4%)  | 0.03 (0.01-0.06)         | -90% (-96.4 to -74.6%)   |
|              |                              | Syrian Arab Republic         | 0.4% (0.1-0.7%)          | -55.2% (-87.3 to 39.7%)  | 0.37 (0.12-0.74)         | -86.9% (-96.5 to -57.2%) |
|              |                              | Tunisia                      | 0.9% (0.3-1.9%)          | -1.9% (-72.9 to 223.1%)  | 0.36 (0.1-0.75)          | -77.4% (-94.5 to -17.8%) |
|              |                              | Türkiye                      | 0.2% (0.1-0.5%)          | -39% (-80.5 to 95.9%)    | 0.06 (0.02-0.13)         | -93.8% (-98.2 to -78.9%) |
|              |                              | United Arab Emirates         | 0.3% (0.1-0.7%)          | -71.4% (-90.8 to -25.8%) | 0.08 (0.03-0.22)         | -92.7% (-97.6 to -80.6%) |
|              |                              | Yemen                        | 1.1% (0.6-1.8%)          | -33.8% (-69 to 36.5%)    | 1.07 (0.56-1.82)         | -79.2% (-90.3 to -57.6%) |
|              |                              | Afghanistan                  | 1.6% (0.8-2.8%)          | -25.6% (-65.9 to 81.2%)  | 3.88 (1.8-6.96)          | -80.3% (-91.4 to -52.2%) |
|              |                              | Sudan                        | 1.2% (0.6-2.2%)          | -34.3% (-70.4 to 43.6%)  | 1.19 (0.51-2.23)         | -90.2% (-95.6 to -79.7%) |
|              |                              | Global                       | 0.6% (0.5-0.7%)          | 31.5% (-7.9 to 79.7%)    | 0.39 (0.3-0.51)          | -39.8% (-60 to -6.3%)    |
|              |                              | North Africa and Middle East | 0.8% (0.5-1.4%)          | 8.3% (-36.9 to 85.9%)    | 0.35 (0.21-0.59)         | -14.9% (-54.3 to 56.2%)  |
|              |                              | Algeria                      | 0.4% (0.1-1%)            | 50.1% (-63.6 to 590.4%)  | 0.08 (0.02-0.18)         | 6% (-74.1 to 359.5%)     |
|              |                              | Bahrain                      | 0.2% (0.1-0.4%)          | -36.6% (-76.2 to 71.1%)  | 0.03 (0.01-0.05)         | -52.7% (-83.4 to 28.6%)  |
|              |                              | Egypt                        | 1.6% (0.5-3.3%)          | 3.3% (-60.5 to 151%)     | 1.03 (0.18-2.39)         | -29.8% (-76.3 to 74%)    |
|              |                              | Iran                         | 0.6% (0.2-0.9%)          | 14.7% (-26.7 to 63%)     | 0.1 (0.03-0.15)          | -9.6% (-51.9 to 45%)     |
|              |                              | Iraq                         | 0.6% (0.3-1.2%)          | -2.6% (-61.1 to 146.3%)  | 0.46 (0.16-0.91)         | -35.3% (-76.1 to 67.1%)  |
|              |                              | Jordan                       | 0.2% (0.1-0.4%)          | -31.2% (-80.4 to 164.7%) | 0.02 (0.01-0.04)         | -73% (-93.5 to 37.6%)    |
|              |                              | Kuwait                       | 0.5% (0.3-0.8%)          | 20.4% (-47.9 to 150%)    | 0.06 (0.03-0.09)         | -11.4% (-61.6 to 92%)    |
|              |                              | Lebanon                      | 0.4% (0.1-0.9%)          | -6.4% (-80.4 to 380.2%)  | 0.06 (0.01-0.15)         | -23.6% (-84.9 to 286.8%) |
|              |                              | Libya                        | 0.4% (0.1-0.9%)          | -30.9% (-79.1 to 109.7%) | 0.07 (0.02-0.14)         | -37.5% (-83.3 to 82.4%)  |
|              |                              | Morocco                      | 0.9% (0.3-2.1%)          | 12.5% (-63.5 to 260.1%)  | 0.22 (0.08-0.47)         | -7.1% (-70.9 to 190%)    |
|              |                              | Palestine                    | 0.3% (0.1-0.6%)          | -15.7% (-77.4 to 179.1%) | 0.05 (0.01-0.1)          | -34.1% (-83.5 to 126.1%) |
|              |                              | Oman                         | 0.4% (0.2-0.8%)          | -8.9% (-70.4 to 177.8%)  | 0.46 (0.17-0.96)         | -49.1% (-85.2 to 57%)    |
|              |                              | Qatar                        | 0.4% (0.2-0.7%)          | -17.4% (-64.3 to 100.6%) | 0.05 (0.02-0.1)          | -41.4% (-77 to 37%)      |
|              |                              | Saudi Arabia                 | 0.1% (0.0-0.5%)          | -0.6% (-77.4 to 172.4%)  | 0.04 (0.01-0.15)         | -49.5% (-89.5 to 45.4%)  |
|              |                              | Syrian Arab Republic         | 0.2% (0.1-0.4%)          | -28.9% (-77.2 to 113.1%) | 0.06 (0.02-0.12)         | -57.7% (-88.5 to 38.5%)  |
|              |                              | Tunisia                      | 0.4% (0.1-1%)            | 7.3% (-71.6 to 289.8%)   | 0.07 (0.02-0.17)         | -24.2% (-81.6 to 188.9%) |
|              |                              | Türkiye                      | 0.1% (0.0-0.3%)          | -21.5% (-81.4 to 177.3%) | 0.02 (0.01-0.05)         | -58.4% (-91.2 to 62.5%)  |
|              | United Arab Emirates         | 0.4% (0.1-0.9%)              | -15.1% (-75.2 to 156.9%) | 0.07 (0.02-0.15)         | -32.4% (-81.4 to 130.9%) |                          |
|              | Yemen                        | 0.5% (0.2-1%)                | -20.2% (-70.1 to 116.5%) | 0.15 (0.07-0.29)         | -25.9% (-71 to 86.7%)    |                          |
|              | Afghanistan                  | 0.3% (0.1-0.7%)              | -12.3% (-63.7 to 116.7%) | 0.56 (0.21-1.51)         | -25.9% (-70.4 to 85.9%)  |                          |
|              | Sudan                        | 0.5% (0.2-1.1%)              | -21% (-71.9 to 121.6%)   | 0.15 (0.07-0.29)         | -39.4% (-77 to 76.3%)    |                          |
|              | Global                       | 29.7% (27.2-32.4%)           | -8.6% (-13.9 to -3.1%)   | 525.57 (463.91-589.93)   | -40.8% (-47.4 to -34.3%) |                          |
|              | North Africa and Middle East | 29.2% (26.5-32.1%)           | -2.5% (-8.3 to 5.1%)     | 533.24 (450.16-622.16)   | -33.7% (-42.6 to -21.4%) |                          |
|              | Algeria                      | 23.4% (17-29.3%)             | -0.1% (-7.6 to 6%)       | 410.3 (278.57-551.21)    | -44.6% (-56.3 to -31%)   |                          |
|              | Bahrain                      | 32.4% (28-36.5%)             | -4.9% (-12.6 to 3.2%)    | 305.27 (242.73-382.55)   | -54.8% (-63.5 to -43.6%) |                          |
|              | Egypt                        | 34.3% (29.1-38.6%)           | 32.3% (10.2 to 49.4%)    | 734.11 (528.25-1009.87)  | -14.4% (-34.7 to 10%)    |                          |
|              | Iran                         | 25.8% (22.8-29%)             | -4.8% (-7.8 to -2.1%)    | 325.8 (281.73-373.28)    | -48.3% (-53.6 to -40.5%) |                          |
|              | Iraq                         | 31.4% (26.2-36.4%)           | -9.9% (-15.5 to -5.3%)   | 917.95 (689.76-1178.55)  | -27.3% (-43.3 to -7.8%)  |                          |
|              | Jordan                       | 22.6% (19.1-26.2%)           | 1.4% (-3.2 to 7.2%)      | 327.98 (259.19-404.42)   | -49.5% (-58.7 to -39.1%) |                          |
|              | Kuwait                       | 34.3% (30.5-37.8%)           | 0.6% (-2.3 to 3.9%)      | 321.62 (267.47-391.12)   | -11.1% (-23.6 to 4.3%)   |                          |
|              | Lebanon                      | 22.1% (17.6-26.7%)           | 1.6% (-6.6 to 9.4%)      | 166.14 (115.93-215.78)   | -32.7% (-47.6 to -14.7%) |                          |
|              | Libya                        | 27.1% (20.1-33.4%)           | 3.9% (-9 to 16.1%)       | 425.68 (287.87-594.2)    | -18.2% (-37.4 to 8.4%)   |                          |
|              | Morocco                      | 26.3% (22-30.4%)             | -0.7% (-10.9 to 9.4%)    | 593.27 (444.81-767.08)   | -17.8% (-37.4 to 4.6%)   |                          |
|              | Palestine                    | 22.8% (17.5-27.8%)           | -10.4% (-20.1 to -3.6%)  | 485.67 (356.72-612.51)   | -39.6% (-54.1 to -22.2%) |                          |
|              | Oman                         | 27.5% (21.3-33%)             | -14% (-23.7 to -7.1%)    | 517.75 (390.52-652.4)    | -47.3% (-59.8 to -29.8%) |                          |
|              | Qatar                        | 34.4% (30.7-37.7%)           | -5.3% (-10.1 to -0.7%)   | 311.43 (247.97-397.07)   | -47.6% (-59.5 to -32.5%) |                          |
|              | Saudi Arabia                 | 35.8% (31.6-39.7%)           | 1.8% (-6 to 9.1%)        | 756.82 (586.95-933.06)   | -27.8% (-47.1 to -2.5%)  |                          |
|              | Syrian Arab Republic         | 23.3% (19.3-27.5%)           | -2.1% (-10.7 to 7.3%)    | 471.75 (341.09-628.82)   | -41.4% (-57.1 to -18.4%) |                          |
|              | Tunisia                      | 22.9% (17.4-28.5%)           | -3.9% (-10.8 to 1.6%)    | 337.89 (232.77-472.49)   | -27.7% (-46.3 to -3.9%)  |                          |
| Stroke       |                              | Algeria                      | 23.4% (17-29.3%)         | -0.1% (-7.6 to 6%)       | 410.3 (278.57-551.21)    | -44.6% (-56.3 to -31%)   |
|              |                              | Bahrain                      | 32.4% (28-36.5%)         | -4.9% (-12.6 to 3.2%)    | 305.27 (242.73-382.55)   | -54.8% (-63.5 to -43.6%) |
|              |                              | Egypt                        | 34.3% (29.1-38.6%)       | 32.3% (10.2 to 49.4%)    | 734.11 (528.25-1009.87)  | -14.4% (-34.7 to 10%)    |
|              |                              | Iran                         | 25.8% (22.8-29%)         | -4.8% (-7.8 to -2.1%)    | 325.8 (281.73-373.28)    | -48.3% (-53.6 to -40.5%) |
|              |                              | Iraq                         | 31.4% (26.2-36.4%)       | -9.9% (-15.5 to -5.3%)   | 917.95 (689.76-1178.55)  | -27.3% (-43.3 to -7.8%)  |
|              |                              | Jordan                       | 22.6% (19.1-26.2%)       | 1.4% (-3.2 to 7.2%)      | 327.98 (259.19-404.42)   | -49.5% (-58.7 to -39.1%) |
|              |                              | Kuwait                       | 34.3% (30.5-37.8%)       | 0.6% (-2.3 to 3.9%)      | 321.62 (267.47-391.12)   | -11.1% (-23.6 to 4.3%)   |
|              |                              | Lebanon                      | 22.1% (17.6-26.7%)       | 1.6% (-6.6 to 9.4%)      | 166.14 (115.93-215.78)   | -32.7% (-47.6 to -14.7%) |
|              |                              | Libya                        | 27.1% (20.1-33.4%)       | 3.9% (-9 to 16.1%)       | 425.68 (287.87-594.2)    | -18.2% (-37.4 to 8.4%)   |
|              |                              | Morocco                      | 26.3% (22-30.4%)         | -0.7% (-10.9 to 9.4%)    | 593.27 (444.81-767.08)   | -17.8% (-37.4 to 4.6%)   |
|              |                              | Palestine                    | 22.8% (17.5-27.8%)       | -10.4% (-20.1 to -3.6%)  | 485.67 (356.72-612.51)   | -39.6% (-54.1 to -22.2%) |
|              |                              | Oman                         | 27.5% (21.3-33%)         | -14% (-23.7 to -7.1%)    | 517.75 (390.52-652.4)    | -47.3% (-59.8 to -29.8%) |
|              |                              | Qatar                        | 34.4% (30.7-37.7%)       | -5.3% (-10.1 to -0.7%)   | 311.43 (247.97-397.07)   | -47.6% (-59.5 to -32.5%) |
|              |                              | Saudi Arabia                 | 35.8% (31.6-39.7%)       | 1.8% (-6 to 9.1%)        | 756.82 (586.95-933.06)   | -27.8% (-47.1 to -2.5%)  |
|              |                              | Syrian Arab Republic         | 23.3% (19.3-27.5%)       | -2.1% (-10.7 to 7.3%)    | 471.75 (341.09-628.82)   | -41.4% (-57.1 to -18.4%) |
|              |                              | Tunisia                      | 22.9% (17.4-28.5%)       | -3.9% (-10.8 to 1.6%)    | 337.89 (232.77-472.49)   | -27.7% (-46.3 to -3.9%)  |



**Table S15** Burden of neurological conditions attributable to risk factors in North Africa and Middle East countries

| Risk factors              | Causes | Locations                    | DALYs (95% UI)        |                         |                           |                          |
|---------------------------|--------|------------------------------|-----------------------|-------------------------|---------------------------|--------------------------|
|                           |        |                              | PAF (%)               | PAF change (%)          | Rate per 100,000          | Rate change (%)          |
|                           |        |                              | 2019                  | From 1990 to 2019       | 2019                      | From 1990 to 2019        |
| Ischaemic stroke          |        | Türkiye                      | 20.4% (17.2–23.8%)    | -10.9% (-18.1 to -3.6%) | 237.86 (183.09–302.86)    | -31.9% (-50.9 to -12.3%) |
|                           |        | United Arab Emirates         | 30.2% (24.4–35.7%)    | 3% (-2.3 to 8.1%)       | 581.53 (421.74–780.36)    | -44.3% (-58.2 to -26.9%) |
|                           |        | Yemen                        | 33.7% (27.2–40.1%)    | -21.2% (-36.2 to -8%)   | 934.02 (673.24–1267.34)   | -40.6% (-57.8 to -16.7%) |
|                           |        | Afghanistan                  | 42% (38.1–46%)        | -13.3% (-22.2 to -5.1%) | 1470.15 (1038.17–1910.81) | -32.2% (-49 to -12.5%)   |
|                           |        | Sudan                        | 36.3% (31.1–40.6%)    | -16.3% (-29.4 to -3.8%) | 938.88 (668.03–1337.89)   | -44% (-57.4 to -25.9%)   |
|                           |        | Global                       | 25.5% (23–28.1%)      | -0.1% (-8.3 to 8.5%)    | 203.4 (177.76–231.59)     | -28.6% (-37.8 to -19.2%) |
|                           |        | North Africa and Middle East | 28.1% (25.3–31%)      | -2.7% (-8.3 to 2.3%)    | 332.52 (281.93–387.23)    | -11.3% (-24.9 to 2.1%)   |
|                           |        | Algeria                      | 22.2% (16–28.2%)      | 3.5% (-3.9 to 9.9%)     | 283.77 (194.03–385.09)    | -22.1% (-37.7 to -2.7%)  |
|                           |        | Bahrain                      | 30.8% (26.7–34.9%)    | -5% (-12.4 to 3.2%)     | 189.18 (151.9–238.37)     | -46.7% (-56.8 to -35%)   |
|                           |        | Egypt                        | 35.3% (30.1–39.5%)    | 16.5% (4.5 to 28.3%)    | 487.64 (355.27–656.08)    | 32.7% (-2.5 to 67.6%)    |
|                           |        | Iran                         | 25.2% (22.2–28.4%)    | -5.4% (-8.3 to -2.9%)   | 248.05 (213.04–286.42)    | -45.9% (-52 to -38.1%)   |
|                           |        | Iraq                         | 29.7% (24.6–34.6%)    | -10.9% (-16.9 to -6.5%) | 543.87 (414.45–681.36)    | -17.1% (-34.6 to 3%)     |
|                           |        | Jordan                       | 21.8% (18.3–25.2%)    | 2.3% (-2.6 to 8%)       | 236.08 (185.66–292.64)    | -45.1% (-55.3 to -34.3%) |
|                           |        | Kuwait                       | 33.1% (29.3–36.5%)    | -0.8% (-3.7 to 2.4%)    | 213.32 (175.12–262.42)    | -12.7% (-24.7 to 1.9%)   |
|                           |        | Lebanon                      | 21.3% (16.9–25.9%)    | 4.9% (-3.5 to 13.5%)    | 127.57 (89.06–165.75)     | -10.9% (-30.8 to 10.6%)  |
|                           |        | Libya                        | 26.7% (19.7–33%)      | 0.2% (-11.3 to 8.9%)    | 299.73 (201.41–419.31)    | 11.5% (-14.3 to 44.7%)   |
|                           |        | Morocco                      | 25.3% (21.1–29.4%)    | 1.9% (-9.1 to 11.9%)    | 405.34 (307.61–519.27)    | 20.7% (-8.7 to 51.1%)    |
|                           |        | Palestine                    | 22% (16.8–26.8%)      | -10.1% (-20.1 to -3%)   | 350.3 (258–442.52)        | -26.1% (-43.3 to -6.5%)  |
|                           |        | Oman                         | 27% (20.8–32.7%)      | -14.6% (-24 to -7.3%)   | 348.06 (263.87–443.22)    | -30.3% (-46.9 to -6.6%)  |
|                           |        | Qatar                        | 32.5% (28.7–35.9%)    | -5.9% (-10.6 to -1.4%)  | 187.74 (150.13–237.5)     | -39.3% (-52.9 to -23.6%) |
|                           |        | Saudi Arabia                 | 33.7% (29.6–37.6%)    | 2.6% (-5.6 to 10.1%)    | 438.62 (340.38–538.64)    | -15.3% (-36.7 to 9.4%)   |
|                           |        | Syrian Arab Republic         | 22.5% (18.4–26.6%)    | -5.1% (-12.5 to 3.2%)   | 241.16 (177.7–320.53)     | -28.9% (-47.7 to -3.3%)  |
|                           |        | Tunisia                      | 21.9% (16.6–27.5%)    | -1.7% (-8.4 to 3.3%)    | 238.79 (164.33–334.46)    | 2.2% (-24.2 to 34.7%)    |
|                           |        | Türkiye                      | 18.9% (15.8–22.1%)    | -11.8% (-19.2 to -5.1%) | 125.09 (95.45–157.41)     | -18.8% (-41.8 to 3.5%)   |
|                           |        | United Arab Emirates         | 29% (23.5–34.4%)      | 4.2% (-1.3 to 9.2%)     | 410.8 (301.17–545.79)     | -31.2% (-47.6 to -11.2%) |
|                           |        | Yemen                        | 32.3% (25.9–38.6%)    | -21.1% (-37.3 to -6.7%) | 554.06 (404.3–753.99)     | -5.7% (-33.1 to 28.9%)   |
|                           |        | Afghanistan                  | 39.8% (35.8–44.1%)    | -12.7% (-24.4 to -3.1%) | 742.25 (545.08–990.32)    | 11% (-15.9 to 44.3%)     |
|                           | Sudan  | 35.2% (30.2–39.4%)           | -16% (-30.2 to -2.4%) | 596.27 (430.77–861.56)  | -9.3% (-32.4 to 20.7%)    |                          |
| Intracerebral haemorrhage |        | Global                       | 33.8% (31–36.6%)      | -10.4% (-15.4 to -5.9%) | 281.22 (247.98–314.89)    | -43.2% (-50.3 to -36.4%) |
|                           |        | North Africa and Middle East | 31.6% (28.7–34.6%)    | -1.9% (-9.8 to 9.6%)    | 173.33 (142.8–209.64)     | -52.6% (-60.5 to -40.9%) |
|                           |        | Algeria                      | 26.2% (19.3–32.5%)    | 2.4% (-5.5 to 9%)       | 105.79 (72.28–150.07)     | -67.1% (-75.5 to -56.2%) |
|                           |        | Bahrain                      | 35.5% (30.8–39.8%)    | -4.8% (-12.3 to 2.9%)   | 94.07 (73.72–121.47)      | -65.9% (-73.8 to -55.2%) |
|                           |        | Egypt                        | 33.5% (28–38.9%)      | 27.1% (6.7 to 58.2%)    | 215.76 (143.82–324.5)     | -48.4% (-64.2 to -26.5%) |
|                           |        | Iran                         | 27.8% (24.5–31.1%)    | -2.6% (-6.5 to 2.4%)    | 62.06 (54.15–70.34)       | -54.9% (-61.8 to -46.9%) |
|                           |        | Iraq                         | 34.1% (28.7–39.3%)    | -7.2% (-13.2 to -1.6%)  | 349.01 (254.33–465.64)    | -35% (-52.4 to -12.5%)   |
|                           |        | Jordan                       | 25% (21.2–28.6%)      | 1.8% (-3.1 to 7.8%)     | 81.26 (63.87–102.28)      | -59.3% (-67.5 to -48.8%) |
|                           |        | Kuwait                       | 36.9% (32.9–40.5%)    | 2.1% (-1.5 to 5.9%)     | 90.8 (73.05–113.16)       | -2.2% (-21.6 to 21%)     |
|                           |        | Lebanon                      | 24.5% (19.7–29.5%)    | 2.4% (-5.8 to 11%)      | 31.5 (21.13–45.36)        | -63.1% (-73.9 to -48.6%) |
|                           |        | Libya                        | 28.5% (21.5–35.2%)    | 3.5% (-10.5 to 19.5%)   | 107.66 (68.74–155.95)     | -49.4% (-63.9 to -28.8%) |
|                           |        | Morocco                      | 28.7% (24–33.1%)      | 1.3% (-9 to 12.1%)      | 159.27 (114.35–213.71)    | -50.4% (-64.6 to -30.2%) |
|                           |        | Palestine                    | 25% (19.4–30.2%)      | -7% (-16.8 to 0%)       | 122 (88.04–155.9)         | -59.8% (-70.2 to -45.9%) |
|                           |        | Oman                         | 28.9% (22.8–34.8%)    | -13.6% (-22.9 to -6.4%) | 145.99 (109.73–192.11)    | -65.4% (-74.2 to -52.5%) |
|                           |        | Qatar                        | 37% (32.9–40.3%)      | -3.5% (-8.7 to 1.5%)    | 90.2 (70.3–119.3)         | -57.9% (-69.4 to -43%)   |
|                           |        | Saudi Arabia                 | 38.9% (34.3–43%)      | 3.5% (-4.3 to 11.3%)    | 297.95 (227.24–374.61)    | -39.3% (-57.9 to -10.2%) |
|                           |        | Syrian Arab Republic         | 25.3% (20.9–29.8%)    | -4.1% (-12.3 to 5%)     | 213.01 (149.87–290.31)    | -50.6% (-64.6 to -28.5%) |
|                           |        | Tunisia                      | 25.4% (19.4–31.5%)    | -0.9% (-8.3 to 6.3%)    | 82.06 (54.48–115.55)      | -56.9% (-70.3 to -36.3%) |
|                           |        | Türkiye                      | 22.1% (18.7–25.7%)    | -8.1% (-16.2 to 0.6%)   | 88.35 (66.81–114.82)      | -42% (-59.6 to -23.1%)   |
|                           |        | United Arab Emirates         | 33.4% (27.3–39.7%)    | 4.9% (-0.9 to 10.5%)    | 150.42 (99.77–226.05)     | -62.4% (-74.7 to -45.6%) |
|                           |        | Yemen                        | 36.3% (29.5–42.8%)    | -18.3% (-32.9 to -5.6%) | 321.48 (221.59–445.25)    | -62.2% (-73.9 to -44.8%) |

**Table S15** Burden of neurological conditions attributable to risk factors in North Africa and Middle East countries

| Risk factors             | Causes           | Locations                    | DALYs (95% UI)     |                              |                        |                            |                       |                          |
|--------------------------|------------------|------------------------------|--------------------|------------------------------|------------------------|----------------------------|-----------------------|--------------------------|
|                          |                  |                              | PAF (%)            | PAF change (%)               | Rate per 100,000       | Rate change (%)            |                       |                          |
|                          |                  |                              | 2019               | From 1990 to 2019            | 2019                   | From 1990 to 2019          |                       |                          |
| Subarachnoid haemorrhage |                  | Afghanistan                  | 44.7% (40.6–48.7%) | -10.7% (-19.3 to -3%)        | 625.24 (435.78–839.45) | -51.8% (-64.5 to -35.1%)   |                       |                          |
|                          |                  | Sudan                        | 38.5% (33.2–42.9%) | -14.2% (-26.8 to -0.6%)      | 296.83 (195.97–425.84) | -66.2% (-75.6 to -52.7%)   |                       |                          |
|                          |                  | Global                       | 30% (26.8–33.1%)   | -16.8% (-22.3 to -11.4%)     | 40.95 (33.38–49.73)    | -61.9% (-68.1 to -45.9%)   |                       |                          |
|                          |                  | North Africa and Middle East | 29.1% (25.8–32.3%) | 16.4% (-0.1 to 47.7%)        | 27.38 (21.39–35.06)    | -56.9% (-69.5 to -31.9%)   |                       |                          |
|                          |                  | Algeria                      | 27% (19.9–33.8%)   | 7.2% (-2.9 to 18.9%)         | 20.74 (13.39–29.51)    | -62.1% (-73.7 to -39.9%)   |                       |                          |
|                          |                  | Bahrain                      | 35.1% (30.6–39.3%) | 15.7% (1.7 to 33.7%)         | 22.01 (16.31–31.56)    | -51.5% (-67.1 to -30.5%)   |                       |                          |
|                          |                  | Egypt                        | 26.9% (19.9–35%)   | 84.3% (25.7 to 242.3%)       | 30.71 (20–44.93)       | -57.5% (-74.9 to -23.3%)   |                       |                          |
|                          |                  | Iran                         | 28.8% (25.4–32.2%) | 2.1% (-2.9 to 6.8%)          | 15.7 (13.31–18.93)     | -54.7% (-67.3 to -31.4%)   |                       |                          |
|                          |                  | Iraq                         | 34.7% (29.3–40.1%) | -0.7% (-9.6 to 10%)          | 25.07 (17.57–35.86)    | -64.2% (-77.1 to -41.8%)   |                       |                          |
|                          |                  | Jordan                       | 27.3% (23.3–31.3%) | 5.2% (-0.4 to 11.5%)         | 10.63 (7.97–13.5)      | -47.2% (-61.5 to -23.8%)   |                       |                          |
|                          |                  | Kuwait                       | 37.2% (33.5–40.9%) | 9.1% (2.8 to 17.1%)          | 17.49 (14.22–21.6)     | -28.9% (-42.9 to -4.1%)    |                       |                          |
|                          |                  | Lebanon                      | 26.5% (21.3–31.8%) | 9.2% (-0.5 to 19.7%)         | 7.07 (4.62–10.19)      | -61% (-76.8 to -36.2%)     |                       |                          |
|                          |                  | Libya                        | 25.5% (18.6–32.2%) | 40.9% (2.2 to 103.3%)        | 18.29 (11.43–28.02)    | -52.5% (-68.1 to -25.2%)   |                       |                          |
|                          |                  | Morocco                      | 28.5% (23.8–33.2%) | 7% (-6.5 to 22.8%)           | 28.65 (18.92–42.72)    | -55.7% (-72.1 to -22.6%)   |                       |                          |
|                          |                  | Palestine                    | 26.7% (21–32.2%)   | -5.5% (-15.2 to 2%)          | 13.37 (9.81–17.28)     | -49% (-64.2 to -25.8%)     |                       |                          |
|                          |                  | Oman                         | 26.5% (20.4–32.6%) | 2% (-14.8 to 25.9%)          | 23.7 (14.18–39.9)      | -61.6% (-77 to -26.4%)     |                       |                          |
|                          |                  | Qatar                        | 40.1% (35.6–43.7%) | 2.4% (-5.5 to 9.5%)          | 33.49 (24.56–44.23)    | -53.2% (-72.4 to -24.7%)   |                       |                          |
|                          |                  | Saudi Arabia                 | 40.9% (36–45.4%)   | 6.4% (-2.6 to 15.9%)         | 20.26 (14.55–27.13)    | -49.4% (-70.7 to -14.8%)   |                       |                          |
|                          |                  | Syrian Arab Republic         | 16.1% (12.6–20.1%) | 42% (6.2 to 95.1%)           | 17.57 (12.37–24.34)    | -51% (-68.6 to -18.4%)     |                       |                          |
|                          |                  | Tunisia                      | 26.4% (20.5–32.5%) | 6.1% (-4.6 to 19.2%)         | 17.04 (11.09–24.59)    | -60.5% (-76.2 to -32.2%)   |                       |                          |
|                          |                  | Türkiye                      | 24.2% (20.6–27.9%) | -4.7% (-13.4 to 4.4%)        | 24.42 (17.94–32.47)    | -42.6% (-63.8 to -2.7%)    |                       |                          |
|                          |                  | United Arab Emirates         | 33.4% (27.3–39.6%) | 18.1% (5.6 to 33.1%)         | 20.31 (10.45–33.68)    | -58% (-74.3 to -30.2%)     |                       |                          |
|                          |                  | Yemen                        | 35.6% (28.8–42.3%) | -15.3% (-31.8 to 0.2%)       | 58.48 (30.7–98.87)     | -56.9% (-71.7 to -28.7%)   |                       |                          |
|                          |                  | Alcohol use                  | Stroke             | Afghanistan                  | 43.9% (39.4–48.8%)     | -10.1% (-21 to -0.2%)      | 102.66 (33.45–177.87) | -49.5% (-65.4 to -19.4%) |
|                          |                  |                              |                    | Sudan                        | 37.3% (32–42.2%)       | -8.6% (-25.4 to 16.2%)     | 45.78 (25.3–77.86)    | -67.1% (-79.3 to -37.3%) |
|                          |                  |                              |                    | Global                       | 5.8% (4.2–7.4%)        | 16% (2.3 to 32.9%)         | 102.76 (72.28–133.09) | -24.8% (-35.9 to -12.2%) |
|                          |                  |                              |                    | North Africa and Middle East | 0.4% (0.2–0.7%)        | -30.8% (-55.2 to -8.8%)    | 7.65 (3.24–12.3)      | -52.9% (-69.5 to -37.4%) |
|                          |                  |                              |                    | Algeria                      | 0.4% (0–0.7%)          | 70.1% (-195.8 to 760.5%)   | 6.72 (0.41–13.23)     | -5.7% (-163.2 to 363.6%) |
| Bahrain                  | 0.7% (0.2–1.3%)  |                              |                    | -72% (-89.3 to -55%)         | 6.66 (2.24–11.94)      | -86.7% (-95 to -77.4%)     |                       |                          |
| Egypt                    | 0.1% (-0.1–0.4%) |                              |                    | -31.1% (-534.7 to 383.9%)    | 2.39 (-2.61–8.93)      | -55.1% (-397.6 to 223.5%)  |                       |                          |
| Iran                     | 0.5% (0.3–0.7%)  |                              |                    | 448.2% (118.3 to 4869.5%)    | 6.44 (3.88–9.32)       | 197.8% (20 to 2297.6%)     |                       |                          |
| Iraq                     | 0.4% (0–0.9%)    |                              |                    | -70.1% (-103.5 to -35.8%)    | 12.02 (-0.73–26.57)    | -75.8% (-102.8 to -44.8%)  |                       |                          |
| Jordan                   | 0.2% (-0.1–0.6%) |                              |                    | 57.2% (-1182.4 to 991.6%)    | 3.48 (-1.62–9.18)      | -21.7% (-578.9 to 398.7%)  |                       |                          |
| Kuwait                   | 0% (-0.1–0.1%)   |                              |                    |                              | 0.01 (-0.87–1.36)      |                            |                       |                          |
| Lebanon                  | 0.6% (0.2–1.1%)  |                              |                    | -62.5% (-85.2 to -38.7%)     | 4.92 (1.47–9.5)        | -75% (-91 to -56.5%)       |                       |                          |
| Libya                    | 0.3% (0–0.5%)    |                              |                    | 502.8% (-142.2 to 1892.5%)   | 4.73 (0.15–7.87)       | 373.1% (-130.7 to 1564.7%) |                       |                          |
| Morocco                  | 0.3% (0–0.6%)    |                              |                    | -68.1% (-100.1 to -42.5%)    | 5.99 (-0.01–12.93)     | -73.6% (-100.1 to -49.1%)  |                       |                          |
| Palestine                | 1.1% (0.7–1.5%)  |                              |                    | 28.3% (-17.4 to 172.6%)      | 22.79 (14.3–32.32)     | -13.5% (-48.6 to 88.6%)    |                       |                          |
| Oman                     | 0% (-0.2–0.3%)   |                              |                    | -71.7% (-1035.1 to 572.5%)   | 0.38 (-4.15–5.29)      | -82.9% (-661.9 to 391.3%)  |                       |                          |
| Qatar                    | 0.3% (-0.1–0.7%) |                              |                    | -53.8% (-134.7 to -3.2%)     | 2.48 (-0.75–6.34)      | -74.3% (-116.5 to -43.5%)  |                       |                          |
| Saudi Arabia             | 0.2% (-0.1–0.6%) |                              |                    | -67.1% (-214.2 to 136.5%)    | 4.03 (-2.56–14.19)     | -76.6% (-183.4 to 70.1%)   |                       |                          |
| Syrian Arab Republic     | 0.7% (0.4–1.1%)  |                              |                    | -42% (-64.9 to -22.8%)       | 14.73 (7.11–24.53)     | -65.3% (-81 to -46%)       |                       |                          |
| Tunisia                  | 1% (0.5–1.6%)    |                              |                    | 72% (3.5 to 307.8%)          | 15.04 (6.7–24.81)      | 29.4% (-29.7 to 211.4%)    |                       |                          |
| Türkiye                  | 1.2% (0.5–1.8%)  |                              |                    | -3.4% (-43.4 to 57.9%)       | 13.79 (5.97–22.71)     | -26.1% (-59 to 29.8%)      |                       |                          |



**Table S15** Burden of neurological conditions attributable to risk factors in North Africa and Middle East countries

| Risk factors              | Causes               | Locations                    | DALYs (95% UI)             |                                 |                            |                                 |
|---------------------------|----------------------|------------------------------|----------------------------|---------------------------------|----------------------------|---------------------------------|
|                           |                      |                              | PAF (%)                    | PAF change (%)                  | Rate per 100,000           | Rate change (%)                 |
|                           |                      |                              | 2019                       | From 1990 to 2019               | 2019                       | From 1990 to 2019               |
| Ischaemic stroke          |                      | United Arab Emirates         | 0.6% (-0.3–1.6%)           | -77.2% (-115.1 to -44.7%)       | 12.13 (-4.95–31.83)        | -87.6% (-108.7 to -68.6%)       |
|                           |                      | Yemen                        | 0.5% (0.2–0.7%)            | -71.7% (-86.7 to -55.4%)        | 12.57 (4.79–22.38)         | -78.6% (-90.1 to -62.2%)        |
|                           |                      | Afghanistan                  | 0% (-0.1–0.1%)             |                                 | 0.86 (-2.09–4.46)          |                                 |
|                           |                      | Sudan                        | 0% (-0.1–0%)               | -102.3% (-113.8 to -97.4%)      | -0.53 (-1.81–0.63)         | -101.5% (-109 to -98.2%)        |
|                           |                      | Global                       | 2.1% (0.3–3.9%)            | 26.7% (-125.5 to 275.9%)        | 16.86 (2.07–31.5)          | -9.4% (-117.7 to 163.3%)        |
|                           |                      | North Africa and Middle East | 0% (-0.2–0.3%)             | -48.2% (-399.7 to 533.7%)       | 0.36 (-2.44–3.31)          | -52.7% (-370 to 468.5%)         |
|                           |                      | Algeria                      | 0% (-0.3–0.3%)             | -95.3% (-991 to 1125.3%)        | -0.06 (-4.05–4.09)         | -97.1% (-765.3 to 811.9%)       |
|                           |                      | Bahrain                      | 0.1% (-0.3–0.5%)           | -91.3% (-217.4 to -55.6%)       | 0.44 (-1.98–3.18)          | -95.1% (-168.3 to -73.5%)       |
|                           |                      | Egypt                        | -0.1% (-0.4–0.1%)          | 11.7% (-415.6 to 465.1%)        | -1.59 (-5.1–1.99)          | 27.1% (-456.2 to 547.2%)        |
|                           |                      | Iran                         | 0.3% (0.1–0.5%)            | 993.8% (-11892.9 to 7518.4%)    | 2.84 (0.93–4.99)           | 526.6% (-6564 to 4368.7%)       |
|                           |                      | Iraq                         | -0.1% (-0.4–0.2%)          | -136.6% (-750.9 to 590.8%)      | -1.93 (-7.62–4.26)         | -133.9% (-745.5 to 567.5%)      |
|                           |                      | Jordan                       | -0.1% (-0.3–0.3%)          | -52.1% (-796.9 to 578.5%)       | -0.54 (-3.57–3.03)         | -74.5% (-487.4 to 290.1%)       |
|                           |                      | Kuwait                       | -0.1% (-0.2–0%)            |                                 | -0.43 (-1.13–0.32)         |                                 |
|                           |                      | Lebanon                      | 0.3% (-0.1–0.7%)           | -59.5% (-154.5 to -7.9%)        | 1.66 (-0.83–4.72)          | -65.3% (-144.1 to -18.5%)       |
|                           |                      | Libya                        | 0.2% (0–0.3%)              | -4996.8% (-11729.3 to 13571.4%) | 1.69 (-0.07–3.28)          | -5465.9% (-14472.5 to 14852.3%) |
|                           |                      | Morocco                      | 0% (-0.2–0.3%)             | -89.8% (-870.6 to 708.5%)       | 0.31 (-3.77–4.56)          | -88% (-1002.1 to 790.8%)        |
|                           |                      | Palestine                    | 0.5% (0.2–0.9%)            | 74.3% (-26.1 to 649.8%)         | 8.65 (3.2–15.05)           | 42.8% (-40.3 to 532%)           |
|                           |                      | Oman                         | -0.2% (-0.4–0.1%)          | -3.2% (-175.5 to 179.5%)        | -2.16 (-5.86–1.62)         | -20.6% (-150.7 to 164%)         |
|                           |                      | Qatar                        | -0.1% (-0.5–0.2%)          | 136.2% (-552.7 to 678.4%)       | -0.84 (-3.04–1.41)         | 50.8% (-379.6 to 392.6%)        |
|                           |                      | Saudi Arabia                 | -0.1% (-0.3–0.2%)          | -240.4% (-727.8 to 887%)        | -0.87 (-3.89–2.68)         | -212.9% (-592.5 to 750.3%)      |
|                           |                      | Syrian Arab Republic         | 0.3% (0–0.5%)              | -45% (-89.1 to -17.1%)          | 2.77 (0.3–5.87)            | -58.7% (-91.3 to -31.3%)        |
|                           |                      | Tunisia                      | 0.3% (-0.3–0.8%)           | -305.2% (-2755.9 to 2828.7%)    | 2.86 (-2.71–8.76)          | -315.6% (-2938.7 to 3213.6%)    |
|                           |                      | Türkiye                      | 0% (-0.5–0.6%)             | -187.1% (-887 to 769.9%)        | 0.23 (-3.04–3.99)          | -186.5% (-843.5 to 727.2%)      |
|                           | United Arab Emirates | -0.2% (-1.1–0.8%)            | -120.8% (-796.3 to 529.3%) | -2.15 (-15.54–11.27)            | -113.7% (-565.9 to 320.1%) |                                 |
|                           | Yemen                | 0.1% (0–0.3%)                | -75.1% (-116.4 to -47%)    | 2.24 (-0.7–5.96)                | -70.1% (-119.3 to -32.2%)  |                                 |
|                           | Afghanistan          | -0.1% (-0.2–0%)              |                            | -1.36 (-3.05–0.28)              |                            |                                 |
|                           | Sudan                | 0% (-0.1–0%)                 | -125.8% (-487.6 to 156.2%) | -0.85 (-2.12–0.22)              | -127.6% (-513.9 to 186.7%) |                                 |
| Intracerebral haemorrhage |                      | Global                       | 10.3% (7.4–13.4%)          | 14.8% (3.2 to 27.9%)            | 85.89 (60.4–111.94)        | -27.3% (-37.5 to -15.8%)        |
|                           |                      | North Africa and Middle East | 1.3% (0.8–1.9%)            | -2.5% (-21.3 to 16.6%)          | 7.29 (4.28–10.9)           | -52.9% (-63.2 to -41.1%)        |
|                           |                      | Algeria                      | 1.7% (0.8–2.7%)            | 125.3% (47 to 335.6%)           | 6.78 (3.12–11.28)          | -27.6% (-55.9 to 46.2%)         |
|                           |                      | Bahrain                      | 2.4% (1.2–3.7%)            | -57.7% (-74.9 to -40.5%)        | 6.22 (3.15–10.12)          | -84.9% (-91.4 to -76.7%)        |
|                           |                      | Egypt                        | 0.6% (0.1–1.3%)            | 48.3% (-45.6 to 327.1%)         | 3.98 (0.61–8.93)           | -39.5% (-80 to 68.6%)           |
|                           |                      | Iran                         | 1.6% (1.1–2.3%)            | 354.5% (186.9 to 954.1%)        | 3.6 (2.37–5.16)            | 110.5% (29.8 to 388.7%)         |
|                           |                      | Iraq                         | 1.4% (0.5–2.4%)            | -54.7% (-81.8 to -20.5%)        | 13.96 (4.43–27.16)         | -68.2% (-87.2 to -40.8%)        |
|                           |                      | Jordan                       | 1.2% (0.4–2.2%)            | 53.2% (-26.7 to 240.7%)         | 4.02 (1.37–7.35)           | -38.7% (-71.6 to 45.8%)         |
|                           |                      | Kuwait                       | 0.2% (0–0.6%)              |                                 | 0.44 (-0.09–1.37)          |                                 |
|                           |                      | Lebanon                      | 2.5% (1.4–3.9%)            | -39.3% (-60.8 to -15.1%)        | 3.27 (1.66–5.67)           | -78.1% (-87.5 to -65.7%)        |
|                           |                      | Libya                        | 0.8% (0.1–1.2%)            | 505% (11.7 to 1371.1%)          | 3.04 (0.47–5.21)           | 194.8% (-47.9 to 669.4%)        |
|                           |                      | Morocco                      | 1% (0.3–1.8%)              | -42.5% (-73 to -14.8%)          | 5.69 (1.82–10.88)          | -71.7% (-87.3 to -52.6%)        |

**Table S15** Burden of neurological conditions attributable to risk factors in North Africa and Middle East countries

| Risk factors            | Causes                       | Locations                    | DALYs (95% UI)           |                          |                          |                          |
|-------------------------|------------------------------|------------------------------|--------------------------|--------------------------|--------------------------|--------------------------|
|                         |                              |                              | PAF (%)                  | PAF change (%)           | Rate per 100,000         | Rate change (%)          |
|                         |                              |                              | 2019                     | From 1990 to 2019        | 2019                     | From 1990 to 2019        |
| Neurological disorders* |                              | Palestine                    | 2.9% (2.4-1%)            | 60.8% (14.1 to 183%)     | 14.13 (9.14-21.28)       | -30.4% (-56.4 to 32.7%)  |
|                         |                              | Oman                         | 0.5% (0.1-1%)            | 28.4% (-43.7 to 228.3%)  | 2.54 (0.4-5.34)          | -48.5% (-77.8 to 40.5%)  |
|                         |                              | Qatar                        | 1.4% (0.5-2.4%)          | -25.7% (-59 to 14.9%)    | 3.32 (1.12-6.09)         | -67.5% (-83.7 to -46.2%) |
|                         |                              | Saudi Arabia                 | 0.6% (0.1-6%)            | -49.3% (-87.1 to -18.6%) | 4.91 (0.11-12.37)        | -70.2% (-93.7 to -44.5%) |
|                         |                              | Syrian Arab Republic         | 1.4% (0.7-2.2%)          | -35% (-57.5 to -16.5%)   | 11.96 (5.96-20.28)       | -66.5% (-81.1 to -47.7%) |
|                         |                              | Tunisia                      | 3.8% (2.3-5.4%)          | 116.7% (62.2 to 236.8%)  | 12.18 (6.89-19.27)       | -5.9% (-40.8 to 63.9%)   |
|                         |                              | Türkiye                      | 3.4% (2.4-9%)            | 13.6% (-17.8 to 58.8%)   | 13.56 (7.53-20.58)       | -28.3% (-56.7 to 9.3%)   |
|                         |                              | United Arab Emirates         | 3.2% (1.1-5.5%)          | -51.7% (-77.8 to -21.2%) | 14.28 (4.57-27.87)       | -82.7% (-93.1 to -66.8%) |
|                         |                              | Yemen                        | 1.2% (0.6-1.9%)          | -56.6% (-74.6 to -38.1%) | 10.33 (4.86-17.74)       | -79.9% (-89.5 to -65.8%) |
|                         |                              | Afghanistan                  | 0.2% (0-0.4%)            |                          | 2.23 (0.06-5.32)         |                          |
|                         |                              | Sudan                        | 0% (0-0.1%)              | -97.5% (-102 to -92.8%)  | 0.32 (0.19-1.06)         | -99% (-100.8 to -97%)    |
|                         |                              | Global                       | 1.5% (0.8-2.5%)          | -5.9% (-14.3 to 2.7%)    | 17.16 (11.54-23.99)      | -7% (-16.7 to 3.9%)      |
|                         |                              | North Africa and Middle East | 0.3% (0.1-0.5%)          | -13.2% (-39.9 to 23.5%)  | 3.4 (1.88-5.53)          | -17% (-44.5 to 21.7%)    |
|                         |                              | Algeria                      | 0.3% (0.1-0.6%)          | 38.4% (-34.9 to 168.7%)  | 3.57 (1.45-6.69)         | 25.7% (-45 to 174.2%)    |
|                         |                              | Bahrain                      | 0.5% (0.2-1%)            | -61.4% (-81.4 to -23.3%) | 6.94 (2.89-12.81)        | -64.8% (-85.2 to -20%)   |
|                         |                              | Egypt                        | 0.1% (0-0.2%)            | -4.1% (-64 to 139.9%)    | 1.05 (0.32-2.4)          | -3.5% (-66.4 to 165%)    |
|                         |                              | Iran                         | 0.2% (0.1-0.4%)          | 219.7% (103.6 to 498.4%) | 2.54 (1.48-4.02)         | 204.6% (90.2 to 478.2%)  |
|                         |                              | Iraq                         | 0.2% (0.1-0.4%)          | -63.3% (-84.8 to -23.9%) | 2.34 (0.8-4.95)          | -64.2% (-86.1 to -18.8%) |
|                         |                              | Jordan                       | 0.2% (0.1-0.5%)          | 12.6% (-54.5 to 162.5%)  | 2.43 (0.81-5.22)         | 6.3% (-60.5 to 176.6%)   |
|                         |                              | Kuwait                       | 0% (0-0.1%)              |                          | 0.35 (0.04-1.02)         |                          |
|                         |                              | Lebanon                      | 0.3% (0.1-0.7%)          | -49.3% (-76.6 to -1.7%)  | 4.27 (1.85-8.28)         | -51.4% (-78.9 to 2.9%)   |
|                         |                              | Libya                        | 0.1% (0-0.2%)            | 231% (-4.9 to 681.4%)    | 1.58 (0.46-2.86)         | 218% (-16.4 to 732.1%)   |
|                         |                              | Morocco                      | 0.2% (0-0.3%)            | -42.8% (-78.1 to 29.1%)  | 2.02 (0.62-4.57)         | -41.1% (-80.8 to 45.7%)  |
|                         |                              | Palestine                    | 0.5% (0.2-1%)            | 24.5% (-28.9 to 127%)    | 6.58 (3.52-11.23)        | 17.3% (-39.2 to 139.2%)  |
|                         |                              | Oman                         | 0.1% (0-0.3%)            | 24.8% (-53.7 to 218.7%)  | 1.45 (0.39-3.28)         | 26.3% (-57.8 to 272.4%)  |
|                         |                              | Qatar                        | 0.2% (0.1-0.5%)          | -38.9% (-76.4 to 49.1%)  | 3.12 (0.98-6.66)         | -40.8% (-79.2 to 69.9%)  |
|                         |                              | Saudi Arabia                 | 0.1% (0-0.4%)            | -43.3% (-75.5 to 13.3%)  | 2.04 (0.31-4.94)         | -43.1% (-78.4 to 26.9%)  |
|                         |                              | Syrian Arab Republic         | 0.1% (0-0.3%)            | -52.9% (-77.7 to -3%)    | 1.57 (0.65-2.92)         | -52.2% (-79.7 to 11%)    |
|                         |                              | Tunisia                      | 0.6% (0.2-1.3%)          | 40.7% (-26.1 to 180.2%)  | 7.65 (3.66-14.02)        | 37.5% (-33.7 to 202.8%)  |
|                         |                              | Türkiye                      | 0.7% (0.3-1.4%)          | 11.9% (-42.3 to 118%)    | 9.8 (4.23-18.05)         | 1.5% (-52.2 to 125.2%)   |
|                         |                              | United Arab Emirates         | 0.7% (0.3-1.3%)          | -57.5% (-80 to -17.8%)   | 8.98 (3.52-17.33)        | -60.4% (-84 to -12.8%)   |
|                         |                              | Yemen                        | 0.2% (0.1-0.4%)          | -58.6% (-79.2 to -20.8%) | 2.23 (0.97-4.09)         | -60.1% (-81.7 to -15.8%) |
|                         | Afghanistan                  | 0% (0-0.1%)                  |                          | 0.7 (0.21-1.49)          |                          |                          |
|                         | Sudan                        | 0% (0-0%)                    | -96% (-98.8 to -91.2%)   | 0.15 (0.04-0.39)         | -96.3% (-99 to -91.1%)   |                          |
|                         | Global                       | 10.1% (7.3-13%)              | 11.2% (-2.6 to 23.8%)    | 17.16 (11.54-23.99)      | -7% (-16.7 to 3.9%)      |                          |
|                         | North Africa and Middle East | 2.1% (1.4-3.1%)              | 11.8% (-16 to 45.8%)     | 3.4 (1.88-5.53)          | -17% (-44.5 to 21.7%)    |                          |
|                         | Algeria                      | 2.5% (1.4-3.6%)              | 103.9% (47.9 to 201.7%)  | 3.57 (1.45-6.69)         | 25.7% (-45 to 174.2%)    |                          |
|                         | Bahrain                      | 3.7% (2.4-5.6%)              | -48.2% (-62.9 to -34%)   | 6.94 (2.89-12.81)        | -64.8% (-85.2 to -20%)   |                          |
|                         | Egypt                        | 1% (0.4-1.7%)                | 21.1% (-31.8 to 123.7%)  | 1.05 (0.32-2.4)          | -3.5% (-66.4 to 165%)    |                          |
|                         | Iran                         | 1.8% (1.2-2.6%)              | 367.8% (206.3 to 790.7%) | 2.54 (1.48-4.02)         | 204.6% (90.2 to 478.2%)  |                          |
|                         | Iraq                         | 1.8% (0.9-2.9%)              | -48.6% (-71.1 to -21.2%) | 2.34 (0.8-4.95)          | -64.2% (-86.1 to -18.8%) |                          |
|                         | Jordan                       | 2% (1-3.3%)                  | 36.3% (-17.3 to 139.4%)  | 2.43 (0.81-5.22)         | 6.3% (-60.5 to 176.6%)   |                          |
|                         | Kuwait                       | 0.3% (0-0.6%)                |                          | 0.35 (0.04-1.02)         |                          |                          |
|                         | Lebanon                      | 3.3% (2.4-8%)                | -34.3% (-54.8 to -12.5%) | 4.27 (1.85-8.28)         | -51.4% (-78.9 to 2.9%)   |                          |
|                         | Libya                        | 1.1% (0.3-1.7%)              | 353.6% (27.6 to 721.5%)  | 1.58 (0.46-2.86)         | 218% (-16.4 to 732.1%)   |                          |
|                         | Morocco                      | 1.5% (0.8-2.4%)              | -33.3% (-55.5 to -8.5%)  | 2.02 (0.62-4.57)         | -41.1% (-80.8 to 45.7%)  |                          |
|                         | Palestine                    | 4.1% (2.6-6%)                | 55.8% (16.1 to 143.6%)   | 6.58 (3.52-11.23)        | 17.3% (-39.2 to 139.2%)  |                          |
| Idiopathic epilepsy     |                              | Sudan                        | 0% (0-0%)                | -96% (-98.8 to -91.2%)   | 0.15 (0.04-0.39)         | -96.3% (-99 to -91.1%)   |
|                         |                              | Global                       | 10.1% (7.3-13%)          | 11.2% (-2.6 to 23.8%)    | 17.16 (11.54-23.99)      | -7% (-16.7 to 3.9%)      |
|                         |                              | North Africa and Middle East | 2.1% (1.4-3.1%)          | 11.8% (-16 to 45.8%)     | 3.4 (1.88-5.53)          | -17% (-44.5 to 21.7%)    |
|                         |                              | Algeria                      | 2.5% (1.4-3.6%)          | 103.9% (47.9 to 201.7%)  | 3.57 (1.45-6.69)         | 25.7% (-45 to 174.2%)    |
|                         |                              | Bahrain                      | 3.7% (2.4-5.6%)          | -48.2% (-62.9 to -34%)   | 6.94 (2.89-12.81)        | -64.8% (-85.2 to -20%)   |
|                         |                              | Egypt                        | 1% (0.4-1.7%)            | 21.1% (-31.8 to 123.7%)  | 1.05 (0.32-2.4)          | -3.5% (-66.4 to 165%)    |
|                         |                              | Iran                         | 1.8% (1.2-2.6%)          | 367.8% (206.3 to 790.7%) | 2.54 (1.48-4.02)         | 204.6% (90.2 to 478.2%)  |
|                         |                              | Iraq                         | 1.8% (0.9-2.9%)          | -48.6% (-71.1 to -21.2%) | 2.34 (0.8-4.95)          | -64.2% (-86.1 to -18.8%) |
|                         |                              | Jordan                       | 2% (1-3.3%)              | 36.3% (-17.3 to 139.4%)  | 2.43 (0.81-5.22)         | 6.3% (-60.5 to 176.6%)   |
|                         |                              | Kuwait                       | 0.3% (0-0.6%)            |                          | 0.35 (0.04-1.02)         |                          |
|                         |                              | Lebanon                      | 3.3% (2.4-8%)            | -34.3% (-54.8 to -12.5%) | 4.27 (1.85-8.28)         | -51.4% (-78.9 to 2.9%)   |
|                         |                              | Libya                        | 1.1% (0.3-1.7%)          | 353.6% (27.6 to 721.5%)  | 1.58 (0.46-2.86)         | 218% (-16.4 to 732.1%)   |

**Table S15** Burden of neurological conditions attributable to risk factors in North Africa and Middle East countries

| Risk factors                    | Causes               | Locations                    | DALYs (95% UI)           |                          |                          |                          |
|---------------------------------|----------------------|------------------------------|--------------------------|--------------------------|--------------------------|--------------------------|
|                                 |                      |                              | PAF (%)                  | PAF change (%)           | Rate per 100,000         | Rate change (%)          |
|                                 |                      |                              | 2019                     | From 1990 to 2019        | 2019                     | From 1990 to 2019        |
| Child and maternal malnutrition | Meningitis           | Oman                         | 1.4% (0.6–2.3%)          | 40.5% (-3.6 to 121.4%)   | 1.45 (0.39–3.28)         | 26.3% (-57.8 to 272.4%)  |
|                                 |                      | Qatar                        | 2.5% (1.4–3.8%)          | -16.9% (-38.9 to 9.4%)   | 3.12 (0.98–6.66)         | -40.8% (-79.2 to 69.9%)  |
|                                 |                      | Saudi Arabia                 | 0.9% (0.2–1.9%)          | -42.2% (-67 to -18.2%)   | 2.04 (0.31–4.94)         | -43.1% (-78.4 to 26.9%)  |
|                                 |                      | Syrian Arab Republic         | 1.5% (0.8–2.3%)          | -42% (-60.2 to -22.7%)   | 1.57 (0.65–2.92)         | -52.2% (-79.7 to 11%)    |
|                                 |                      | Tunisia                      | 6.5% (4.3–9%)            | 89.8% (45.9 to 153.5%)   | 7.65 (3.66–14.02)        | 37.5% (-33.7 to 202.8%)  |
|                                 |                      | Türkiye                      | 4.6% (2.9–6.4%)          | 45% (5.9 to 110.1%)      | 9.8 (4.23–18.05)         | 1.5% (-52.2 to 125.2%)   |
|                                 |                      | United Arab Emirates         | 4.2% (2.3–6.5%)          | -44.3% (-66.7 to -22.4%) | 8.98 (3.52–17.33)        | -60.4% (-84 to -12.8%)   |
|                                 |                      | Yemen                        | 1.5% (0.9–2.3%)          | -45.2% (-65.5 to -21.1%) | 2.23 (0.97–4.09)         | -60.1% (-81.7 to -15.8%) |
|                                 |                      | Afghanistan                  | 0.3% (0.1–0.6%)          |                          | 0.7 (0.21–1.49)          |                          |
|                                 |                      | Sudan                        | 0.1% (0–0.2%)            | -94.4% (-98.2 to -88.1%) | 0.15 (0.04–0.39)         | -96.3% (-99 to -91.1%)   |
|                                 |                      | Global                       | 6.4% (5.7–7.3%)          | 13.4% (-1.6 to 30.6%)    | 14.9 (11.92–19.23)       | -51.4% (-61 to -38.4%)   |
|                                 |                      | North Africa and Middle East | 6.8% (5.2–9%)            | -10.3% (-35.5 to 22.9%)  | 4.79 (3.37–6.71)         | -78.3% (-85.5 to -67.4%) |
|                                 |                      | Algeria                      | 4% (2.4–6.3%)            | -8.9% (-52.2 to 78.3%)   | 1.62 (0.91–2.7)          | -81.7% (-91.1 to -62.8%) |
|                                 |                      | Bahrain                      | 1.7% (1.2–2.4%)          | -53.4% (-73.4 to -20%)   | 0.32 (0.21–0.46)         | -88.1% (-93.5 to -78.8%) |
|                                 |                      | Egypt                        | 9.2% (4.5–16%)           | -33.7% (-69.4 to 32.3%)  | 5 (2.09–9.57)            | -83.7% (-93.7 to -65.1%) |
|                                 |                      | Iran                         | 4.3% (3.2–5.3%)          | -34% (-51.9 to -11.9%)   | 1.64 (1.17–2.18)         | -86.3% (-91.5 to -79.3%) |
|                                 | Iraq                 | 8.3% (5.3–12%)               | -16.7% (-55.7 to 49.2%)  | 5.59 (3.35–8.89)         | -83.3% (-91.6 to -67%)   |                          |
|                                 | Jordan               | 5.7% (3.4–9.4%)              | -11.6% (-54.7 to 86.4%)  | 3.03 (1.68–5.48)         | -61.5% (-83.1 to -10.9%) |                          |
|                                 | Kuwait               | 5.9% (3.8–8.3%)              | 3.1% (-32.5 to 51.3%)    | 1.19 (0.65–1.78)         | -61.8% (-77.6 to -40.2%) |                          |
|                                 | Lebanon              | 3.2% (1.6–5.4%)              | -53.6% (-79.5 to -3.9%)  | 0.93 (0.43–1.64)         | -85.4% (-93.8 to -68.6%) |                          |
|                                 | Libya                | 2.4% (1.4–4%)                | -66.2% (-82.6 to -33.8%) | 0.85 (0.48–1.48)         | -89.8% (-95 to -80.2%)   |                          |
|                                 | Morocco              | 9.8% (5.3–16.6%)             | -27.1% (-66.3 to 54%)    | 6.76 (3.12–12.68)        | -86.8% (-94.8 to -67.4%) |                          |
|                                 | Palestine            | 3.9% (2.5–5.7%)              | -29.4% (-62.3 to 31.1%)  | 1.58 (0.97–2.42)         | -87.6% (-93.8 to -75.6%) |                          |
|                                 | Oman                 | 4.1% (2.2–7%)                | -35% (-65.8 to 26.9%)    | 1 (0.53–1.87)            | -83% (-91.4 to -64%)     |                          |
|                                 | Qatar                | 3.3% (2.1–5%)                | -43.6% (-69.4 to 1.8%)   | 0.83 (0.53–1.28)         | -84.8% (-92.5 to -70.8%) |                          |
|                                 | Saudi Arabia         | 0.4% (0.2–0.7%)              | -63.5% (-84.3 to -24.5%) | 0.12 (0.06–0.19)         | -90.2% (-95.5 to -80.2%) |                          |
|                                 | Syrian Arab Republic | 2.6% (1.4–4.3%)              | -53.1% (-78.4 to 2.5%)   | 2.56 (1.37–4.42)         | -86.2% (-93.6 to -68.9%) |                          |
|                                 | Tunisia              | 5.9% (3.5–9.3%)              | -6.6% (-51.7 to 84%)     | 2.24 (1.22–3.71)         | -78.6% (-90 to -55.1%)   |                          |
|                                 | Türkiye              | 2% (1.3–3.2%)                | -36.6% (-66.6 to 20.3%)  | 0.51 (0.31–0.85)         | -93.5% (-96.9 to -86.5%) |                          |
|                                 | United Arab Emirates | 1.4% (0.7–3.4%)              | -72.2% (-86.8 to -45.4%) | 0.43 (0.21–1.08)         | -92.9% (-96.5 to -85.7%) |                          |
|                                 | Yemen                | 5.1% (2.9–8.3%)              | -10.6% (-55.6 to 76.3%)  | 4.96 (2.71–8.63)         | -71.9% (-86.4 to -43.6%) |                          |
|                                 | Afghanistan          | 5.9% (3–10.4%)               | -7.1% (-56.6 to 110.5%)  | 14.31 (7.06–25.73)       | -75.4% (-89 to -43.5%)   |                          |
| Sudan                           | 5% (2.8–8.3%)        | -9.1% (-50.3 to 65.6%)       | 4.99 (2.59–9.08)         | -86.4% (-93 to -75%)     |                          |                          |
| Global                          | 2.3% (1.8–2.8%)      | 43.9% (3 to 92.7%)           | 1.53 (1.18–1.96)         | -34.1% (-55.6 to 2%)     |                          |                          |
| North Africa and Middle East    | 3.7% (2.1–5.9%)      | 8.8% (-31.6 to 74.9%)        | 1.52 (0.9–2.5)           | -14.5% (-51.5 to 51.4%)  |                          |                          |
| Algeria                         | 2.3% (1.1–4.3%)      | 23.3% (-45.4 to 180.2%)      | 0.44 (0.23–0.78)         | -12.2% (-64.5 to 112.1%) |                          |                          |
| Bahrain                         | 1% (0.6–1.6%)        | -32.3% (-66.3 to 33.2%)      | 0.11 (0.06–0.2)          | -49.5% (-77.1 to 2%)     |                          |                          |
| Egypt                           | 6.6% (2.2–13.4%)     | 4.9% (-55 to 124.7%)         | 4.29 (0.77–9.74)         | -28.8% (-72.2 to 63.4%)  |                          |                          |
| Iran                            | 3.5% (1.4–4.8%)      | 7.6% (-25.3 to 43.9%)        | 0.58 (0.2–0.84)          | -15.2% (-53.5 to 28.8%)  |                          |                          |
| Iraq                            | 3.3% (1.6–5.7%)      | 10.3% (-48 to 140.9%)        | 2.33 (0.89–4.39)         | -26.6% (-68.7 to 74.7%)  |                          |                          |
| Jordan                          | 1.5% (0.8–2.5%)      | -32.2% (-72.1 to 35.6%)      | 0.16 (0.08–0.28)         | -73.5% (-90.7 to -6.1%)  |                          |                          |
| Kuwait                          | 2.2% (1.5–3%)        | 20.6% (-20.3 to 92.8%)       | 0.23 (0.15–0.33)         | -11.2% (-44.5 to 47.3%)  |                          |                          |
| Lebanon                         | 2.6% (1.3–4.8%)      | -3.6% (-60.4 to 139.5%)      | 0.43 (0.19–0.85)         | -21.1% (-70.3 to 98.9%)  |                          |                          |
| Libya                           | 2.5% (1.1–4.6%)      | -19.8% (-68.5 to 87.3%)      | 0.4 (0.21–0.72)          | -27.6% (-73.3 to 77.2%)  |                          |                          |
| Morocco                         | 5.4% (2–10.4%)       | -2.7% (-52.5 to 103.2%)      | 1.3 (0.62–2.44)          | -19.3% (-65.2 to 84.1%)  |                          |                          |
| Palestine                       | 1.9% (1.1–3.2%)      | -10.2% (-58.5 to 101.8%)     | 0.31 (0.17–0.52)         | -29.3% (-69.2 to 56.7%)  |                          |                          |
| Oman                            | 1.9% (1.3–6%)        | 2.7% (-55.6 to 153.6%)       | 2.36 (1.12–4.28)         | -42.6% (-76.3 to 39.3%)  |                          |                          |
| Qatar                           | 1.5% (0.8–2.4%)      | -16.9% (-62.2 to 86.7%)      | 0.2 (0.1–0.36)           | -41.1% (-76.5 to 32.8%)  |                          |                          |
| Saudi Arabia                    | 0.5% (0.1–1.7%)      | 1.5% (-71.8 to 128.7%)       | 0.14 (0.04–0.57)         | -48.4% (-87.3 to 10.2%)  |                          |                          |

**Table S15** Burden of neurological conditions attributable to risk factors in North Africa and Middle East countries

| Risk factors         | Causes             | Locations                    | DALYs (95% UI)         |                          |                         |                          |
|----------------------|--------------------|------------------------------|------------------------|--------------------------|-------------------------|--------------------------|
|                      |                    |                              | PAF (%)                | PAF change (%)           | Rate per 100,000        | Rate change (%)          |
|                      |                    |                              | 2019                   | From 1990 to 2019        | 2019                    | From 1990 to 2019        |
| Dietary risks        | Stroke             | Syrian Arab Republic         | 1.5% (0.9–2.2%)        | -24.1% (-61.5 to 37.8%)  | 0.4 (0.23–0.69)         | -55% (-79.3 to -7.4%)    |
|                      |                    | Tunisia                      | 2.7% (1.3–5%)          | 4.1% (-55.7 to 158.3%)   | 0.46 (0.24–0.84)        | -26.6% (-72.3 to 80.1%)  |
|                      |                    | Türkiye                      | 0.9% (0.4–2%)          | -19.9% (-66.5 to 67.6%)  | 0.17 (0.08–0.35)        | -57.9% (-83.7 to -4.3%)  |
|                      |                    | United Arab Emirates         | 2.1% (1.3–9%)          | -17.9% (-67.6 to 98.6%)  | 0.37 (0.16–0.69)        | -34.6% (-75.4 to 68.7%)  |
|                      |                    | Yemen                        | 2.3% (1.1–4.5%)        | 5% (-55.4 to 167.7%)     | 0.67 (0.34–1.25)        | -2.1% (-57.5 to 138.7%)  |
|                      |                    | Afghanistan                  | 1.1% (0.5–2.3%)        | 6.7% (-56.6 to 155.4%)   | 2.07 (0.84–5.18)        | -9.4% (-62.7 to 119.3%)  |
|                      |                    | Sudan                        | 2% (1.3–9%)            | 3.8% (-56.7 to 169.7%)   | 0.61 (0.33–1.04)        | -20.4% (-66.6 to 104.2%) |
|                      |                    | Global                       | 30% (22.2–39.1%)       | -7.9% (-13.3 to -3.5%)   | 531.25 (389.53–704.59)  | -40.4% (-46.8 to -34.1%) |
|                      |                    | North Africa and Middle East | 16.7% (12.6–21.5%)     | -1.7% (-10.2 to 6.8%)    | 304.56 (223.3–400.76)   | -33.2% (-42.5 to -21.5%) |
|                      |                    | Algeria                      | 16.9% (12.5–21.7%)     | -19.6% (-31.7 to -5.9%)  | 295.81 (206.66–406.83)  | -55.4% (-66.2 to -42%)   |
|                      |                    | Bahrain                      | 13.1% (9.2–18.2%)      | -6.6% (-16.6 to 3.6%)    | 123.58 (83.57–180.76)   | -55.6% (-64.9 to -45%)   |
|                      |                    | Egypt                        | 11.7% (7.4–17%)        | 20.4% (-8.9 to 49%)      | 250.33 (145.11–390.67)  | -22.1% (-46.7 to 6.3%)   |
|                      |                    | Iran                         | 15.3% (11.1–20.2%)     | -17.6% (-26.1 to -9.4%)  | 192.92 (136.37–258.25)  | -55.3% (-62.5 to -47.6%) |
|                      |                    | Iraq                         | 17% (11.7–23%)         | 11.1% (-2.2 to 26.6%)    | 497.79 (325.62–710.38)  | -10.4% (-32.7 to 14.8%)  |
|                      |                    | Jordan                       | 20.3% (15.1–25.7%)     | -4.1% (-9.1 to 1.7%)     | 293.35 (209.99–390.68)  | -52.3% (-60.9 to -42.9%) |
|                      |                    | Kuwait                       | 20.8% (14.7–28.5%)     | -4.6% (-11.9 to 3.1%)    | 195.01 (133.56–276.94)  | -15.8% (-29.1 to -0.1%)  |
|                      |                    | Lebanon                      | 16.8% (12.2–21.6%)     | 27.4% (13.1 to 44.6%)    | 126.67 (82.7–178.68)    | -15.5% (-35.7 to 6%)     |
|                      |                    | Libya                        | 19% (13.9–24.7%)       | 19.9% (4.3 to 36.6%)     | 298.38 (201.89–422.4)   | -5.7% (-28.6 to 25.7%)   |
|                      |                    | Morocco                      | 15.4% (11–20.8%)       | -16.2% (-31.2 to 1.3%)   | 347.07 (234.66–492.1)   | -30.6% (-49.2 to -7.1%)  |
|                      |                    | Palestine                    | 20.2% (15–25.8%)       | -14.8% (-23.8 to -5.4%)  | 430.4 (311.83–565.63)   | -42.5% (-55.2 to -25.6%) |
|                      |                    | Oman                         | 14.6% (10.5–19.4%)     | -14% (-25.6 to -1.8%)    | 275.41 (191.61–378.36)  | -47.2% (-60.1 to -29.1%) |
|                      |                    | Qatar                        | 11.9% (7.9–17.1%)      | -8.1% (-19.1 to 2.5%)    | 107.2 (65.91–161.05)    | -49.2% (-61.9 to -34.5%) |
|                      |                    | Saudi Arabia                 | 17% (12.3–23.1%)       | 11.3% (0.3 to 24.2%)     | 360.33 (239.33–508.81)  | -21% (-42.5 to 7.4%)     |
|                      |                    | Syrian Arab Republic         | 19.3% (14.5–24.7%)     | 17.9% (7.2 to 31.9%)     | 388.93 (271.68–538.62)  | -29.5% (-47.9 to -3.2%)  |
|                      |                    | Tunisia                      | 14.7% (10.3–19.8%)     | -10% (-22.8 to 4.7%)     | 217.81 (139.4–317.01)   | -32.2% (-51.4 to -7%)    |
|                      |                    | Türkiye                      | 11.5% (8–15.7%)        | -5.5% (-13.8 to 3.5%)    | 134.08 (87.32–191.22)   | -27.7% (-46.7 to -9.4%)  |
|                      |                    | United Arab Emirates         | 17.8% (12.7–23.5%)     | 4.4% (-12.1 to 22.1%)    | 343.26 (223.78–504.76)  | -43.6% (-60 to -22.9%)   |
|                      |                    | Yemen                        | 25.8% (19.9–31.8%)     | 5% (-5.2 to 15.9%)       | 714.65 (496.09–1006.84) | -20.7% (-40.7 to 7.3%)   |
|                      |                    | Afghanistan                  | 29.7% (23.3–36.2%)     | -0.7% (-10 to 8.8%)      | 1038.6 (707.84–1452.73) | -22.3% (-41.5 to -1.1%)  |
|                      |                    | Sudan                        | 21.9% (16.3–27.8%)     | -3.5% (-15.4 to 11.4%)   | 567.22 (380.9–891.43)   | -35.4% (-50.8 to -15.9%) |
|                      |                    | Global                       | 26.7% (18.8–35.6%)     | -3.8% (-9.5 to 0.5%)     | 213.15 (146.68–289.04)  | -31.2% (-38.6 to -24.3%) |
|                      |                    | North Africa and Middle East | 17.4% (12.1–22.4%)     | -4.1% (-8.8 to 0%)       | 206.11 (140.26–270.9)   | -12.5% (-23.8 to -0.8%)  |
| Algeria              | 17.4% (11.9–22.5%) | -14.8% (-26.2 to -4%)        | 221.5 (144.16–303.18)  | -35.8% (-50.6 to -18.9%) |                         |                          |
| Bahrain              | 13.6% (8.7–18.4%)  | -9.1% (-17.8 to -0.8%)       | 83.74 (52.31–120.85)   | -48.9% (-58.8 to -38.2%) |                         |                          |
| Egypt                | 12.7% (7.2–18.1%)  | 5.6% (-14.1 to 24.6%)        | 175.65 (93.56–280.9)   | 20.2% (-18.1 to 60.8%)   |                         |                          |
| Iran                 | 16.6% (11.8–21.4%) | -15.7% (-24.2 to -8.5%)      | 163.07 (112.67–213.72) | -51.7% (-59.5 to -43.8%) |                         |                          |
| Iraq                 | 17.2% (11.3–23.8%) | 3.7% (-8.4 to 18%)           | 315.16 (193.65–449.31) | -3.5% (-25.3 to 23.3%)   |                         |                          |
| Jordan               | 20.8% (14.8–26.5%) | -4.4% (-8.9 to 0.4%)         | 225.44 (152.86–305.15) | -48.6% (-57.8 to -38.9%) |                         |                          |
| Kuwait               | 20.2% (12.9–28%)   | -5.9% (-13.8 to 2.1%)        | 129.98 (81.36–186.54)  | -17.3% (-29.8 to -1%)    |                         |                          |
| Lebanon              | 17.7% (12.1–22.4%) | 15.3% (7 to 26.2%)           | 105.53 (65.48–147.89)  | -2% (-23.1 to 20.1%)     |                         |                          |
| Libya                | 19.9% (13.8–25.7%) | 10.5% (0.6 to 22%)           | 223.69 (143.29–313.93) | 22.9% (-5.5 to 58.9%)    |                         |                          |
| Morocco              | 16.8% (11.3–22.2%) | -13.4% (-27 to 0.1%)         | 269.65 (171.39–374.17) | 2.6% (-24.8 to 32.6%)    |                         |                          |
| Palestine            | 20.6% (14.9–26.4%) | -11.8% (-19.5 to -3.7%)      | 328.49 (229.76–438.96) | -27.5% (-42.8 to -7.2%)  |                         |                          |
| Oman                 | 14.9% (9.6–19.8%)  | -15.6% (-25.1 to -5.5%)      | 191.82 (120.45–265.71) | -31% (-47.4 to -8.7%)    |                         |                          |
| Qatar                | 12.3% (7.3–17.2%)  | -11.1% (-20.8 to -2.3%)      | 71.05 (40.06–103.25)   | -42.6% (-56.2 to -28.1%) |                         |                          |
| Saudi Arabia         | 16.6% (10.2–22.7%) | 9.7% (-0.4 to 20.8%)         | 215.77 (130.31–308.2)  | -9.3% (-32.1 to 19.9%)   |                         |                          |
| Syrian Arab Republic | 20.5% (14.7–25.9%) | 9.8% (1.7 to 20.4%)          | 219.59 (146.93–302.96) | -17.7% (-39 to 10.9%)    |                         |                          |
| Tunisia              | 15.5% (10–20.4%)   | -9.8% (-19.9 to -0.1%)       | 168.53 (103.9–248.15)  | -6.1% (-31.2 to 24.6%)   |                         |                          |
| Türkiye              | 14% (9.5–17.9%)    | -6.8% (-13.4 to -0.8%)       | 92.94 (59.16–126.42)   | -14.2% (-36.9 to 7.6%)   |                         |                          |

**Table S15** Burden of neurological conditions attributable to risk factors in North Africa and Middle East countries

| Risk factors              | Causes               | Locations                    | DALYs (95% UI)          |                          |                          |                          |
|---------------------------|----------------------|------------------------------|-------------------------|--------------------------|--------------------------|--------------------------|
|                           |                      |                              | PAF (%)                 | PAF change (%)           | Rate per 100,000         | Rate change (%)          |
|                           |                      |                              | 2019                    | From 1990 to 2019        | 2019                     | From 1990 to 2019        |
| Intracerebral haemorrhage |                      | United Arab Emirates         | 17.7% (11.2–23.5%)      | 3.2% (-12.8 to 22.3%)    | 250.06 (154.81–356.32)   | -31.8% (-51.1 to -7.6%)  |
|                           |                      | Yemen                        | 25.2% (18.6–31.7%)      | 7.5% (2.9 to 12.4%)      | 433.05 (299.01–610.32)   | 28.7% (0.5 to 66%)       |
|                           |                      | Afghanistan                  | 28.2% (21–35.3%)        | 4% (-2.6 to 10.6%)       | 526.05 (347.13–764.9)    | 32.5% (0.3 to 68%)       |
|                           |                      | Sudan                        | 22.4% (16–28.8%)        | -1.1% (-7.8 to 7.2%)     | 379.41 (241.08–592.93)   | 6.9% (-15.3 to 36.4%)    |
|                           |                      | Global                       | 32.8% (23.3–43.4%)      | -8.5% (-14.3 to -3.6%)   | 273.5 (188.99–364.6)     | -42% (-49.7 to -34.9%)   |
|                           |                      | North Africa and Middle East | 15.5% (10.1–21.3%)      | -6.1% (-14.1 to 3.6%)    | 84.92 (54.4–121.01)      | -54.6% (-62.1 to -44.9%) |
|                           |                      | Algeria                      | 15.4% (9.3–22%)         | -29% (-45.6 to -12.8%)   | 62.06 (35.47–93.59)      | -77.2% (-84.6 to -67.4%) |
|                           |                      | Bahrain                      | 12% (6.5–18.3%)         | -8.8% (-22.8 to 5.6%)    | 31.85 (16.53–51.06)      | -67.3% (-76.2 to -56.9%) |
|                           |                      | Egypt                        | 10.1% (5.1–15.7%)       | 7.3% (-25.8 to 45.2%)    | 64.82 (29.78–117.3)      | -56.4% (-73.3 to -33.4%) |
|                           |                      | Iran                         | 10.7% (5.8–16.7%)       | -30.7% (-46.4 to -14.5%) | 23.86 (12.91–37.18)      | -67.9% (-76.3 to -58.3%) |
|                           |                      | Iraq                         | 16.6% (10.3–24.8%)      | 20.2% (0.8 to 54.4%)     | 170.12 (98.62–267.17)    | -15.8% (-40.5 to 22.9%)  |
|                           |                      | Jordan                       | 18.4% (11.5–26%)        | -6% (-12.6 to 1.8%)      | 59.85 (37.28–85.7)       | -62.4% (-70 to -52.7%)   |
|                           |                      | Kuwait                       | 22.2% (13.9–31.1%)      | -2.8% (-13.1 to 7.2%)    | 54.56 (32.6–79.41)       | -6.9% (-27.5 to 17.7%)   |
|                           |                      | Lebanon                      | 13.3% (7.2–19.5%)       | 36.9% (13.8 to 92.7%)    | 17.13 (8.37–28.92)       | -50.5% (-66 to -23.4%)   |
|                           |                      | Libya                        | 16.9% (10.5–24.3%)      | 15.1% (-3.7 to 39.4%)    | 63.66 (36.15–103.02)     | -43.8% (-60.3 to -19.3%) |
|                           |                      | Morocco                      | 11.8% (6.1–18.2%)       | -32.3% (-53.4 to -7.2%)  | 65.39 (33.06–106.44)     | -66.8% (-80.6 to -46.8%) |
|                           |                      | Palestine                    | 18.8% (12.2–26.2%)      | -22% (-36.8 to -5.3%)    | 91.77 (56.94–134.37)     | -66.1% (-76.5 to -52.1%) |
|                           |                      | Oman                         | 14.1% (8.2–20.2%)       | -16% (-29.6 to -3.1%)    | 71.23 (40.46–105.91)     | -66.3% (-75.5 to -52.7%) |
|                           |                      | Qatar                        | 10.7% (5–17.3%)         | -7.9% (-25.9 to 7.4%)    | 26.02 (11.85–44.37)      | -59.7% (-72.4 to -45%)   |
|                           |                      | Saudi Arabia                 | 17.6% (10.7–25.6%)      | 14.5% (1.1 to 36.9%)     | 134.9 (74.85–208.6)      | -32.7% (-53.7 to -1%)    |
|                           | Syrian Arab Republic | 18.6% (11.8–25.9%)           | 15.3% (-0.4 to 37.2%)   | 156.24 (93.65–241.53)    | -40.6% (-58.8 to -13%)   |                          |
|                           | Tunisia              | 12.6% (7.2–19%)              | -19.1% (-35.6 to -1.9%) | 40.62 (21.79–65.72)      | -64.8% (-76.8 to -45.6%) |                          |
|                           | Türkiye              | 7.9% (3.6–13.2%)             | -15.6% (-34.9 to -0.7%) | 31.72 (13.64–56.79)      | -46.7% (-66.1 to -28.6%) |                          |
|                           | United Arab Emirates | 18.1% (10.8–25.7%)           | 6.2% (-18.6 to 45%)     | 81.73 (43.95–140.95)     | -61.9% (-76.7 to -39.6%) |                          |
|                           | Yemen                | 26.9% (18.6–35.1%)           | 5.5% (0 to 13.6%)       | 237.85 (145.2–359.85)    | -51.1% (-64.7 to -32.2%) |                          |
|                           | Afghanistan          | 31.5% (22.6–40.2%)           | 0.3% (-7.1 to 7.4%)     | 440.02 (275.46–646.6)    | -45.8% (-59.9 to -27.4%) |                          |
|                           | Sudan                | 21.1% (13.8–28.6%)           | -8.5% (-18.3 to 5%)     | 162.41 (92.21–262.88)    | -64% (-73.8 to -50.1%)   |                          |
| Subarachnoid haemorrhage  |                      | Global                       | 32.7% (23.6–42.3%)      | -10.9% (-17 to -5.8%)    | 44.6 (31.24–59.66)       | -59.2% (-65.9 to -43.3%) |
|                           |                      | North Africa and Middle East | 14.3% (9.2–19.9%)       | 11.1% (-5.3 to 39.6%)    | 13.53 (8.28–20.27)       | -58.8% (-70.3 to -36.6%) |
|                           |                      | Algeria                      | 15.9% (9.7–23%)         | -25% (-42.9 to -6.6%)    | 12.26 (6.89–19.45)       | -73.4% (-83.7 to -57.5%) |
|                           |                      | Bahrain                      | 12.8% (7.1–19%)         | 11% (-10.1 to 34.5%)     | 8 (4.13–12.92)           | -53.5% (-69.5 to -33%)   |
|                           |                      | Egypt                        | 8.6% (4.3–13.8%)        | 60.5% (-1.1 to 209.4%)   | 9.86 (4.65–17.08)        | -62.9% (-79.3 to -31.7%) |
|                           |                      | Iran                         | 11% (6–17%)             | -29% (-45.5 to -11.9%)   | 5.99 (3.25–9.42)         | -68.5% (-79.9 to -49.7%) |
|                           |                      | Iraq                         | 17.3% (10.9–25.5%)      | 28.4% (7.3 to 63.9%)     | 12.52 (6.9–20.51)        | -53.7% (-71 to -23.7%)   |
|                           |                      | Jordan                       | 20.7% (13.2–28.8%)      | -2.6% (-9.5 to 6%)       | 8.05 (4.91–11.67)        | -51.1% (-64.7 to -28.2%) |
|                           |                      | Kuwait                       | 22.3% (14.2–31.1%)      | 1.7% (-9.2 to 13.2%)     | 10.48 (6.46–15.2)        | -33.8% (-47.8 to -10.8%) |
|                           |                      | Lebanon                      | 15% (8.4–21.3%)         | 48.5% (23 to 108.6%)     | 4.02 (2.04–6.37)         | -46.8% (-68.9 to 0.2%)   |
|                           |                      | Libya                        | 15.4% (9.5–22.2%)       | 55.7% (10.1 to 127.4%)   | 11.03 (6.09–18.06)       | -47.5% (-65.4 to -16.9%) |
|                           |                      | Morocco                      | 12% (6.3–18%)           | -27.3% (-50.7 to 1.9%)   | 12.02 (5.76–21.27)       | -69.9% (-83.5 to -41.7%) |
|                           |                      | Palestine                    | 20.2% (13.2–28%)        | -20.8% (-36 to -4.5%)    | 10.14 (6.28–14.37)       | -57.2% (-71.4 to -34.5%) |
|                           |                      | Oman                         | 13.8% (8.4–19.9%)       | 1.5% (-18.5 to 32.1%)    | 12.36 (6.26–21.69)       | -61.9% (-76.9 to -25.2%) |
|                           |                      | Qatar                        | 12.1% (5.9–19%)         | -1.5% (-21.6 to 17.4%)   | 10.13 (4.75–16.65)       | -54.9% (-74.6 to -26.1%) |
|                           |                      | Saudi Arabia                 | 19.5% (12.1–27.5%)      | 16.4% (2.3 to 36.9%)     | 9.65 (5.39–14.81)        | -44.7% (-69.4 to -3.8%)  |
|                           |                      | Syrian Arab Republic         | 12% (7.3–17.4%)         | 71.8% (24.8 to 143.5%)   | 13.09 (7.64–20.28)       | -40.7% (-62.8 to -0.9%)  |
|                           |                      | Tunisia                      | 13.4% (7.7–19.6%)       | -12.1% (-29.6 to 8.8%)   | 8.66 (4.48–13.94)        | -67.2% (-81.5 to -42.1%) |
|                           |                      | Türkiye                      | 9.3% (4.3–14.9%)        | -11.6% (-32.2 to 4.7%)   | 9.42 (4.24–16.12)        | -46.6% (-67.6 to -8.5%)  |
|                           |                      | United Arab Emirates         | 18.8% (11.2–26%)        | 17.5% (-10.8 to 60.7%)   | 11.47 (5.23–20.13)       | -58.2% (-76 to -27.6%)   |
|                           | Yemen                | 26.6% (18.4–34.8%)           | 9.1% (-0.3 to 21.8%)    | 43.74 (20.75–81.04)      | -44.3% (-61.9 to -8.8%)  |                          |
|                           | Afghanistan          | 31% (21.7–39.7%)             | 0.4% (-9.3 to 9.7%)     | 72.52 (24.23–136.85)     | -43.3% (-61.6 to -11.5%) |                          |
|                           | Sudan                | 20.6% (13.4–28.2%)           | -2.5% (-17.8 to 19.7%)  | 25.4 (12.59–49.18)       | -64.9% (-77.6 to -33.9%) |                          |

**Table S15** Burden of neurological conditions attributable to risk factors in North Africa and Middle East countries

| Risk factors         | Causes             | Locations                    | DALYs (95% UI)     |                              |                          |                          |                        |                          |
|----------------------|--------------------|------------------------------|--------------------|------------------------------|--------------------------|--------------------------|------------------------|--------------------------|
|                      |                    |                              | PAF (%)            | PAF change (%)               | Rate per 100,000         | Rate change (%)          |                        |                          |
|                      |                    |                              | 2019               | From 1990 to 2019            | 2019                     | From 1990 to 2019        |                        |                          |
| High body-mass index | Stroke             | Global                       | 23·6% (15·2–32·2%) | 52·7% (32·1 to 88·3%)        | 416·62 (265·74–581·11)   | -1·1% (-16·5 to 24%)     |                        |                          |
|                      |                    | North Africa and Middle East | 33·8% (24·3–42·8%) | 37·9% (22·8 to 61·1%)        | 618 (440·07–822·65)      | -6·2% (-21·8 to 16·6%)   |                        |                          |
|                      |                    | Algeria                      | 30·8% (21·7–39·8%) | 29% (12 to 55·4%)            | 541·64 (362·05–750·9)    | -28·6% (-45·9 to -4·3%)  |                        |                          |
|                      |                    | Bahrain                      | 33·8% (24·3–42·5%) | 6% (-2·9 to 16·5%)           | 317·53 (218·15–428·41)   | -49·7% (-59·4 to -36·6%) |                        |                          |
|                      |                    | Egypt                        | 38·7% (27·8–47·8%) | 65·2% (34·8 to 105·4%)       | 828·97 (545·9–1208·37)   | 6·9% (-21·9 to 44·8%)    |                        |                          |
|                      |                    | Iran                         | 28% (19·9–36·2%)   | 42% (23·8 to 77·8%)          | 353·18 (248·49–462·49)   | -22·9% (-37·2 to 0·4%)   |                        |                          |
|                      |                    | Iraq                         | 36·1% (25·4–46·2%) | -0·5% (-9·6 to 11·8%)        | 1056·12 (692·06–1471·53) | -19·7% (-39·5 to 7·5%)   |                        |                          |
|                      |                    | Jordan                       | 36% (25·5–45·1%)   | 17·4% (6·2 to 33·8%)         | 521·98 (358·2–687·11)    | -41·6% (-53·3 to -26%)   |                        |                          |
|                      |                    | Kuwait                       | 39·3% (28·7–48·3%) | 15·6% (7·6 to 26·5%)         | 368·89 (255·94–482·69)   | 2·1% (-14·4 to 21·5%)    |                        |                          |
|                      |                    | Lebanon                      | 32·7% (22·4–42·4%) | 23% (8·8 to 44·4%)           | 246·61 (159·21–364·34)   | -18·4% (-38 to 7%)       |                        |                          |
|                      |                    | Libya                        | 38·5% (27·8–48%)   | 31·4% (15·6 to 53·9%)        | 605·34 (392·5–858·32)    | 3·4% (-20·6 to 38·1%)    |                        |                          |
|                      |                    | Morocco                      | 30·7% (20·7–40·9%) | 26·6% (7·6 to 60·7%)         | 695·11 (432·3–999·06)    | 5% (-22·1 to 48·4%)      |                        |                          |
|                      |                    | Palestine                    | 25·5% (16·9–34·5%) | 16·7% (4 to 38·3%)           | 542·5 (354·31–758·92)    | -21·3% (-40·5 to 7%)     |                        |                          |
|                      |                    | Oman                         | 31·6% (22·1–40·7%) | 60·9% (24·4 to 131·7%)       | 595·49 (401·46–804·2)    | -1·4% (-31·5 to 55·7%)   |                        |                          |
|                      |                    | Qatar                        | 35·9% (26·2–44·8%) | 3·8% (-8·9 to 17·6%)         | 324·23 (225·43–435·18)   | -42·6% (-56·6 to -24·5%) |                        |                          |
|                      |                    | Saudi Arabia                 | 43·6% (32·3–52·9%) | 49·1% (28·1 to 83·2%)        | 921·86 (636·88–1223·3)   | 5·8% (-24·5 to 55·6%)    |                        |                          |
|                      |                    | Syrian Arab Republic         | 33·7% (23·5–43·4%) | 21·7% (8·5 to 42·9%)         | 680·54 (425·95–986·2)    | -27·1% (-46·5 to 5·9%)   |                        |                          |
|                      |                    | Tunisia                      | 30·4% (20·4–39·8%) | 24·1% (9·2 to 46·7%)         | 449·98 (280·78–668·05)   | -6·6% (-32·8 to 31·4%)   |                        |                          |
|                      |                    | Türkiye                      | 35·5% (24·6–44·9%) | 16·4% (4·8 to 34·2%)         | 413·03 (275·87–564·1)    | -11% (-35·2 to 14·4%)    |                        |                          |
|                      |                    | United Arab Emirates         | 43% (32·6–51·8%)   | 31·8% (17 to 53·4%)          | 828·48 (569·33–1144·45)  | -28·8% (-48·8 to -0·7%)  |                        |                          |
|                      |                    | Yemen                        | 20·4% (12–28·6%)   | 59·1% (24·6 to 145·3%)       | 563·96 (299·1–912·08)    | 20·1% (-19·5 to 108·1%)  |                        |                          |
|                      |                    | Afghanistan                  | 29·5% (19·9–39·1%) | 36·9% (14·7 to 87·8%)        | 1033·02 (612·12–1572·56) | 7·2% (-22·8 to 59·5%)    |                        |                          |
|                      |                    | Sudan                        | 30·4% (20·5–40·6%) | 60·7% (27·8 to 135·9%)       | 788·05 (470·56–1219·19)  | 7·6% (-24·6 to 73·4%)    |                        |                          |
|                      |                    | Ischaemic stroke             | Ischaemic stroke   | Global                       | 16·5% (10·1–23·7%)       | 33% (22·8 to 52·2%)      | 132·05 (80·14–195·95)  | -4·8% (-14·8 to 10·2%)   |
|                      |                    |                              |                    | North Africa and Middle East | 27·3% (18·8–36%)         | 50·1% (34 to 77·5%)      | 323·44 (218·76–443·94) | 37·1% (13·1 to 68·5%)    |
|                      |                    |                              |                    | Algeria                      | 24·8% (16·5–33·7%)       | 62·2% (39·3 to 104·6%)   | 316·09 (194·74–460·92) | 22% (-7·2 to 66·1%)      |
|                      |                    |                              |                    | Bahrain                      | 26·2% (17·7–35·1%)       | 13·2% (2·7 to 26%)       | 160·36 (103·56–226·87) | -36·4% (-48·4 to -21·2%) |
|                      |                    |                              |                    | Egypt                        | 33·9% (23·4–43·5%)       | 71·2% (45·2 to 110·9%)   | 468·82 (302·68–687·36) | 95·1% (39·5 to 167·3%)   |
|                      |                    |                              |                    | Iran                         | 23·9% (16·2–32%)         | 46·4% (26·5 to 82·7%)    | 235·18 (158·39–319·64) | -16·1% (-31·9 to 8·5%)   |
|                      |                    |                              |                    | Iraq                         | 27·5% (17·8–37·1%)       | 1·9% (-8·2 to 15·8%)     | 503·43 (319·42–714·99) | -5% (-26·3 to 25·4%)     |
|                      |                    |                              |                    | Jordan                       | 31% (21·3–40%)           | 24·7% (12·1 to 44·8%)    | 335·53 (221·94–454·77) | -33% (-46·5 to -15·7%)   |
|                      |                    |                              |                    | Kuwait                       | 33% (22·8–42·2%)         | 16·9% (7·4 to 29·1%)     | 212·66 (143·18–291·13) | 2·8% (-12·9 to 23%)      |
|                      |                    |                              |                    | Lebanon                      | 28·3% (18·9–37·4%)       | 44·5% (27·5 to 73·4%)    | 169·14 (107·1–250·31)  | 22·8% (-6·7 to 58%)      |
| Libya                | 33·4% (23·1–43·1%) |                              |                    | 44·5% (29·7 to 69%)          | 375·02 (236·31–545·19)   | 60·9% (24·2 to 115·4%)   |                        |                          |
| Morocco              | 25·3% (16·1–34·9%) |                              |                    | 53·6% (29·3 to 99·4%)        | 405·51 (243·19–598·87)   | 82·4% (32·1 to 154·1%)   |                        |                          |
| Palestine            | 21% (13·3–29·3%)   |                              |                    | 26·9% (12·9 to 54·3%)        | 333·62 (207·78–482·39)   | 4·3% (-20·7 to 42%)      |                        |                          |
| Oman                 | 26% (17·6–35%)     |                              |                    | 95·2% (46·6 to 209·5%)       | 335·2 (211·41–468·71)    | 59·6% (6·4 to 165·8%)    |                        |                          |
| Qatar                | 27·9% (18·8–37·6%) |                              |                    | 10·7% (-5·1 to 29·2%)        | 160·86 (105·22–229·04)   | -28·6% (-46·3 to -6·7%)  |                        |                          |
| Saudi Arabia         | 34·6% (24·4–43·9%) |                              |                    | 70·4% (43·6 to 115·5%)       | 450·01 (293·46–608·45)   | 40·8% (-0·3 to 103·7%)   |                        |                          |
| Syrian Arab Republic | 26·1% (17·3–35·6%) |                              |                    | 25·2% (11·9 to 47·5%)        | 279·53 (168·77–414·14)   | -6·1% (-30·8 to 31·5%)   |                        |                          |
| Tunisia              | 25·1% (16–34·2%)   |                              |                    | 49·2% (30·1 to 81·2%)        | 273·44 (161·95–414·9)    | 55·1% (9·2 to 116·3%)    |                        |                          |
| Türkiye              | 26·4% (17·2–35·7%) |                              |                    | 22·9% (9·4 to 43·1%)         | 174·95 (110·78–248·93)   | 13·2% (-18·4 to 47·4%)   |                        |                          |
| United Arab Emirates | 36·9% (26·8–45·7%) |                              |                    | 50·2% (32 to 80·9%)          | 521·95 (353·67–711·47)   | -0·7% (-27·2 to 35·5%)   |                        |                          |
| Yemen                | 14·7% (8·3–21·6%)  |                              |                    | 93·4% (49·7 to 206·9%)       | 252·92 (132·66–408·98)   | 131·9% (61·8 to 306·5%)  |                        |                          |
| Afghanistan          | 21·3% (13·6–29·2%) |                              |                    | 70·8% (39·9 to 140·4%)       | 396·21 (228·53–604·82)   | 117·7% (54·2 to 231·9%)  |                        |                          |
| Sudan                | 24·1% (15·5–33·6%) |                              |                    | 108·1% (65 to 209·3%)        | 407·82 (234·43–645·81)   | 124·9% (64·4 to 259·2%)  |                        |                          |
| Intracerebral        | Intracerebral      |                              |                    | Global                       | 28·4% (18–39%)           | 65·6% (38·8 to 113·3%)   | 236·21 (149·31–329·45) | 4·9% (-14·3 to 36·6%)    |



**Table S15** Burden of neurological conditions attributable to risk factors in North Africa and Middle East countries

| Risk factors            | Causes                       | Locations                    | DALYs (95% UI)         |                          |                         |                          |
|-------------------------|------------------------------|------------------------------|------------------------|--------------------------|-------------------------|--------------------------|
|                         |                              |                              | PAF (%)                | PAF change (%)           | Rate per 100,000        | Rate change (%)          |
|                         |                              |                              | 2019                   | From 1990 to 2019        | 2019                    | From 1990 to 2019        |
| haemorrhage             | Subarachnoid                 | North Africa and Middle East | 46% (34.5–56.7%)       | 47.3% (29.8 to 76.7%)    | 252.2 (182.48–329.83)   | -28.8% (-42.6 to -7.3%)  |
|                         |                              | Algeria                      | 46.3% (34.3–57.4%)     | 38.8% (20.8 to 69.6%)    | 186.94 (127.5–257.28)   | -55.5% (-67.8 to -36.9%) |
|                         |                              | Bahrain                      | 47.2% (35.2–58.1%)     | 8.9% (-1 to 21.8%)       | 124.86 (85.06–168.81)   | -61% (-69.8 to -47.9%)   |
|                         |                              | Egypt                        | 48.6% (36.6–59.5%)     | 71.5% (35.9 to 128.6%)   | 312.65 (200.21–475.16)  | -30.3% (-52.5 to 5.4%)   |
|                         |                              | Iran                         | 42.1% (31.2–52.5%)     | 43.5% (24 to 80.8%)      | 94.04 (70.09–118.68)    | -33.5% (-46.7 to -11.2%) |
|                         |                              | Iraq                         | 50.2% (36.4–62.6%)     | 6% (-3 to 19.6%)         | 513.96 (342.12–724.8)   | -25.7% (-46.1 to 3.9%)   |
|                         |                              | Jordan                       | 50.2% (37.4–61.3%)     | 15.3% (5.1 to 31.2%)     | 163.5 (115.32–214)      | -53.9% (-63.6 to -40.3%) |
|                         |                              | Kuwait                       | 52.6% (40.3–63.1%)     | 14% (6.7 to 24.7%)       | 129.46 (93.41–167.59)   | 9.2% (-13.4 to 36%)      |
|                         |                              | Lebanon                      | 48.7% (36–60.1%)       | 30.2% (14.9 to 55.7%)    | 62.57 (40.13–93.95)     | -53.1% (-67.2 to -31.7%) |
|                         |                              | Libya                        | 52.1% (39.7–62.9%)     | 36.1% (18.3 to 65.3%)    | 196.26 (130.29–275.76)  | -33.6% (-52.2 to -4%)    |
|                         |                              | Morocco                      | 44% (31.3–56.8%)       | 37.7% (16.6 to 75.6%)    | 244.26 (156.38–350.84)  | -32.5% (-53.2 to 2.9%)   |
|                         |                              | Palestine                    | 38.1% (26.5–49.7%)     | 28% (12.7 to 54.3%)      | 185.84 (124.49–256.61)  | -44.6% (-59.5 to -21.9%) |
|                         |                              | Oman                         | 43.9% (32.3–54.6%)     | 62.7% (27.2 to 124%)     | 221.17 (154.5–300.22)   | -34.7% (-55.8 to 3%)     |
|                         |                              | Qatar                        | 47.9% (36–59%)         | 6.3% (-6.8 to 20.8%)     | 116.72 (79.42–160.29)   | -53.6% (-66.4 to -35.8%) |
|                         |                              | Saudi Arabia                 | 57.5% (44.3–68.2%)     | 48.7% (28.6 to 84%)      | 439.79 (311.35–584.19)  | -12.7% (-40 to 38.5%)    |
|                         |                              | Syrian Arab Republic         | 43.8% (31.3–55.5%)     | 22% (9.1 to 44.3%)       | 367.51 (229.88–532.58)  | -37.1% (-55.5 to -5.6%)  |
|                         |                              | Tunisia                      | 44.8% (32.2–56.8%)     | 36.4% (19.7 to 61.9%)    | 144.49 (90.55–213.37)   | -40.8% (-60.2 to -11.1%) |
|                         |                              | Türkiye                      | 45.9% (32.1–57.8%)     | 22.4% (8.7 to 42.1%)     | 183.24 (122.76–258.16)  | -22.8% (-46.6 to 1.9%)   |
|                         |                              | United Arab Emirates         | 59.7% (47.7–69.8%)     | 33.1% (19.2 to 55.2%)    | 268.95 (178.5–413.11)   | -52.3% (-68.4 to -27.6%) |
|                         |                              | Yemen                        | 29.5% (17.9–40.8%)     | 83% (41.3 to 181.6%)     | 261.46 (139.21–418.98)  | -15.2% (-45 to 55.5%)    |
|                         |                              | Afghanistan                  | 39.2% (26.6–51.8%)     | 50.3% (26.4 to 107%)     | 547.88 (329.77–836.78)  | -18.8% (-43.6 to 26.3%)  |
|                         | Sudan                        | 42.5% (29.9–54.4%)           | 76.5% (39.4 to 161.7%) | 328.31 (190.23–509.55)   | -30.5% (-54.2 to 19.7%) |                          |
|                         | Subarachnoid                 | Global                       | 35.4% (24.4–46.4%)     | 83.6% (48.4 to 148.8%)   | 48.36 (32.49–65.61)     | -15.4% (-34.3 to 15.6%)  |
|                         |                              | North Africa and Middle East | 45.1% (34–55.2%)       | 65.6% (37.8 to 115.7%)   | 42.36 (30.56–56.23)     | -38.1% (-55.5 to -5%)    |
|                         |                              | Algeria                      | 50.2% (38–61.4%)       | 36.8% (18.1 to 68.5%)    | 38.61 (25.84–56.11)     | -51.5% (-66.9 to -23.2%) |
|                         |                              | Bahrain                      | 51.6% (40–61.4%)       | 31.4% (16.1 to 52.8%)    | 32.31 (22.45–46.32)     | -44.9% (-61.8 to -20.7%) |
|                         |                              | Egypt                        | 41.5% (29.4–53.9%)     | 138.3% (58.6 to 345.7%)  | 47.5 (29.36–72.42)      | -44.9% (-68.4 to 4.8%)   |
|                         |                              | Iran                         | 43.9% (33–54.5%)       | 49.3% (28.3 to 88.9%)    | 23.96 (17.65–31.77)     | -33.5% (-52.4 to -0.4%)  |
|                         |                              | Iraq                         | 53.6% (40.5–65.4%)     | 15.7% (2.4 to 36.4%)     | 38.73 (25.07–57.67)     | -58.3% (-73 to -33.4%)   |
|                         |                              | Jordan                       | 59% (46.1–69%)         | 19.6% (8.3 to 38.2%)     | 22.96 (16.52–29.43)     | -39.9% (-56.4 to -12.7%) |
|                         |                              | Kuwait                       | 57% (45–66.3%)         | 14.1% (5.4 to 24.8%)     | 26.77 (19.79–34.17)     | -25.8% (-41.1 to 4.8%)   |
|                         |                              | Lebanon                      | 55.8% (42.8–67.1%)     | 33.9% (16.7 to 61%)      | 14.9 (9.53–21.93)       | -52.1% (-71.3 to -21.3%) |
|                         |                              | Libya                        | 47.5% (35.1–59.4%)     | 77.9% (26.9 to 155.1%)   | 34.06 (21.93–50.61)     | -40% (-59.5 to -5%)      |
| Morocco                 |                              | 45.1% (31.4–57.8%)           | 39.7% (14.4 to 76%)    | 45.34 (27.15–74.09)      | -41.6% (-63.9 to 7.2%)  |                          |
| Palestine               | 46% (34–57.6%)               | 26.4% (11.8 to 50.4%)        | 23.05 (16.15–30.7)     | -31.7% (-51.4 to 2.6%)   |                         |                          |
| Oman                    | 43.8% (32.8–54.5%)           | 88.6% (43.6 to 171.1%)       | 39.12 (22.58–65.9)     | -29% (-57.8 to 37.3%)    |                         |                          |
| Qatar                   | 55.8% (43.4–66.4%)           | 15.1% (2.4 to 32.2%)         | 46.65 (33.03–64.25)    | -47.3% (-68.7 to -17%)   |                         |                          |
| Saudi Arabia            | 64.8% (52.2–74.6%)           | 40.2% (21.1 to 69.2%)        | 32.06 (22.07–44.16)    | -33.3% (-60.9 to 14.9%)  |                         |                          |
| Syrian Arab Republic    | 30.6% (21.5–39.4%)           | 85.8% (36.6 to 153.9%)       | 33.49 (21.53–47.54)    | -35.8% (-57.8 to 6.1%)   |                         |                          |
| Tunisia                 | 49.7% (36.9–61.4%)           | 39.8% (20.2 to 68.2%)        | 32.05 (20.66–45.8)     | -47.8% (-69.2 to -10.8%) |                         |                          |
| Türkiye                 | 54.3% (40.3–65.6%)           | 26% (12.1 to 49.6%)          | 54.84 (37.2–75)        | -23.9% (-51.7 to 27.3%)  |                         |                          |
| United Arab Emirates    | 61.8% (49.6–71.1%)           | 42.3% (23.7 to 70%)          | 37.58 (19.52–61.94)    | -49.4% (-69.6 to -15.3%) |                         |                          |
| Yemen                   | 30.4% (18.6–42.4%)           | 85.7% (39.6 to 194.8%)       | 49.59 (21.88–93.25)    | -4.6% (-41.1 to 95%)     |                         |                          |
| Afghanistan             | 38.4% (25–52%)               | 45.5% (17.9 to 113.6%)       | 88.93 (30.39–166.97)   | -16.9% (-45.9 to 39.7%)  |                         |                          |
| Sudan                   | 42.5% (29.5–55%)             | 80% (34.4 to 175.3%)         | 51.92 (27.05–92.14)    | -34.1% (-61 to 32.1%)    |                         |                          |
| Neurological disorders* | Global                       | 3.4% (0.9–8%)                | 32.1% (19.3 to 58.7%)  | 42.22 (11.24–107.37)     | 30.5% (18.3 to 56.4%)   |                          |
|                         | North Africa and Middle East | 5.3% (1.6–11.9%)             | 55.7% (35.3 to 100%)   | 72.56 (20.98–181.16)     | 48.7% (28.5 to 94.4%)   |                          |
|                         | Algeria                      | 5.5% (1.6–12.6%)             | 76.2% (37.6 to 162.8%) | 74.4 (19.75–183.25)      | 59.8% (26.6 to 143.2%)  |                          |
|                         | Bahrain                      | 6.6% (2–14.6%)               | 33.1% (6.4 to 76%)     | 90.41 (24.9–226.41)      | 21.3% (1.5 to 56.7%)    |                          |
|                         | Egypt                        | 5.5% (1.6–12.4%)             | 43.9% (10.4 to 114.6%) | 71.1 (19.02–173.98)      | 44.7% (9.7 to 120%)     |                          |



**Table S15** Burden of neurological conditions attributable to risk factors in North Africa and Middle East countries

| Risk factors                            | Causes                      | Locations                    | DALYs (95% UI)               |                          |                         |                         |                          |
|-----------------------------------------|-----------------------------|------------------------------|------------------------------|--------------------------|-------------------------|-------------------------|--------------------------|
|                                         |                             |                              | PAF (%)                      | PAF change (%)           | Rate per 100,000        | Rate change (%)         |                          |
|                                         |                             |                              | 2019                         | From 1990 to 2019        | 2019                    | From 1990 to 2019       |                          |
| Alzheimer's disease and other dementias |                             | Iran                         | 4·8% (1·4–10·7%)             | 75·5% (42·8 to 142·2%)   | 65·22 (18·7–168·56)     | 67·3% (36·6 to 135·2%)  |                          |
|                                         |                             | Iraq                         | 5·8% (1·7–13·1%)             | 20·7% (-0·9 to 64·4%)    | 75·58 (20·62–188·59)    | 18·3% (-1·8 to 61·6%)   |                          |
|                                         |                             | Jordan                       | 6·9% (2·1–15·2%)             | 46·8% (18·4 to 96·1%)    | 87·46 (24·25–219·23)    | 38·7% (12·8 to 89·7%)   |                          |
|                                         |                             | Kuwait                       | 7·6% (2·4–16·4%)             | 36·3% (7·9 to 82·3%)     | 95·85 (27·3–233·49)     | 29% (6·1 to 67·6%)      |                          |
|                                         |                             | Lebanon                      | 6% (1·7–13·6%)               | 45·7% (18·7 to 97·9%)    | 78·88 (21·75–195·98)    | 39·9% (14·4 to 96%)     |                          |
|                                         |                             | Libya                        | 6·4% (1·9–14·3%)             | 34·7% (12·6 to 75·2%)    | 87·26 (23·81–223·08)    | 30·5% (6·2 to 71·5%)    |                          |
|                                         |                             | Morocco                      | 4·8% (1·4–10·9%)             | 63·9% (28·5 to 147%)     | 64·33 (17·22–166·38)    | 67·2% (32·4 to 149·3%)  |                          |
|                                         |                             | Palestine                    | 3·8% (1·9–3%)                | 48·2% (14·9 to 129·2%)   | 51·91 (12·92–136·79)    | 39·7% (8·1 to 122·5%)   |                          |
|                                         |                             | Oman                         | 6·6% (2–14·8%)               | 161·8% (81·5 to 399·3%)  | 88·35 (24·45–226·53)    | 164·2% (82 to 416·8%)   |                          |
|                                         |                             | Qatar                        | 8·3% (2·4–18·2%)             | 44·3% (-14 to 147·8%)    | 112·23 (29·3–285·75)    | 41·8% (-13·2 to 138·1%) |                          |
|                                         |                             | Saudi Arabia                 | 6·7% (2·1–14·9%)             | 80·2% (36·6 to 176·8%)   | 95·29 (26·63–234·48)    | 80·6% (39 to 174·5%)    |                          |
|                                         |                             | Syrian Arab Republic         | 5·3% (1·5–12%)               | 38·5% (10·5 to 93·5%)    | 68·58 (17·58–180·38)    | 40·9% (9·3 to 102·4%)   |                          |
|                                         |                             | Tunisia                      | 5·5% (1·6–12·5%)             | 52·8% (23·9 to 110·5%)   | 72·18 (19·82–179·51)    | 48·9% (17·9 to 112·6%)  |                          |
|                                         |                             | Türkiye                      | 5·8% (1·8–13%)               | 51·2% (23·1 to 104·2%)   | 84·41 (23·5–206·24)     | 36·6% (11·8 to 80·2%)   |                          |
|                                         |                             | United Arab Emirates         | 6·6% (1·9–14·6%)             | 55% (7 to 130·7%)        | 93·74 (25·63–237·23)    | 44·3% (5·6 to 112·7%)   |                          |
|                                         |                             | Yemen                        | 2·1% (0·5–5·5%)              | 68·6% (20·6 to 225%)     | 27·67 (6·2–78·56)       | 64·4% (16·9 to 217·1%)  |                          |
|                                         |                             | Afghanistan                  | 3·3% (0·9–7·9%)              | 87·6% (40·5 to 221·1%)   | 49·88 (12·56–130·16)    | 67·8% (26 to 184·2%)    |                          |
|                                         |                             | Sudan                        | 4·1% (1·1–9·4%)              | 142·5% (73·9 to 326·5%)  | 54·26 (14·57–141·73)    | 123·6% (61·7 to 300·4%) |                          |
|                                         |                             | Global                       | 12·5% (4·9–23·3%)            | 25·5% (14·1 to 49·8%)    | 42·22 (11·24–107·37)    | 30·5% (18·3 to 56·4%)   |                          |
|                                         |                             | North Africa and Middle East | 18·7% (8·2–33·1%)            | 50·5% (31·6 to 90·9%)    | 72·56 (20·98–181·16)    | 48·7% (28·5 to 94·4%)   |                          |
|                                         |                             | Algeria                      | 18·5% (8–32·9%)              | 67·7% (38·5 to 151·7%)   | 74·4 (19·75–183·25)     | 59·8% (26·6 to 143·2%)  |                          |
|                                         |                             | Bahrain                      | 22·4% (9·8–38·2%)            | 26·1% (10·4 to 57·5%)    | 90·41 (24·9–226·41)     | 21·3% (1·5 to 56·7%)    |                          |
|                                         |                             | Egypt                        | 19·6% (8·3–34·3%)            | 44·3% (13·8 to 113·1%)   | 71·1 (19·02–173·98)     | 44·7% (9·7 to 120%)     |                          |
|                                         |                             | Iran                         | 16·9% (7·2–29·6%)            | 67·6% (39·1 to 128·8%)   | 65·22 (18·7–168·56)     | 67·3% (36·6 to 135·2%)  |                          |
|                                         |                             | Iraq                         | 19·7% (8·2–34·8%)            | 16·3% (0·2 to 52·1%)     | 75·58 (20·62–188·59)    | 18·3% (-1·8 to 61·6%)   |                          |
|                                         |                             | Jordan                       | 23·6% (10·4–40·2%)           | 45·6% (22·5 to 90·2%)    | 87·46 (24·25–219·23)    | 38·7% (12·8 to 89·7%)   |                          |
|                                         |                             | Kuwait                       | 24·7% (10·9–41·2%)           | 32·6% (9·6 to 69·7%)     | 95·85 (27·3–233·49)     | 29% (6·1 to 67·6%)      |                          |
|                                         |                             | Lebanon                      | 19·9% (8·5–34·9%)            | 43·4% (24·4 to 84·3%)    | 78·88 (21·75–195·98)    | 39·9% (14·4 to 96%)     |                          |
|                                         |                             | Libya                        | 21% (9·4–36·2%)              | 36·3% (19·4 to 69%)      | 87·26 (23·81–223·08)    | 30·5% (6·2 to 71·5%)    |                          |
|                                         |                             | Morocco                      | 16·6% (6·9–29·7%)            | 66·5% (36·6 to 142%)     | 64·33 (17·22–166·38)    | 67·2% (32·4 to 149·3%)  |                          |
|                                         |                             | Palestine                    | 13·4% (4·6–25·9%)            | 46·6% (20·1 to 123·7%)   | 51·91 (12·92–136·79)    | 39·7% (8·1 to 122·5%)   |                          |
|                                         |                             | Oman                         | 20·9% (9·2–35·9%)            | 173·3% (93·1 to 417·2%)  | 88·35 (24·45–226·53)    | 164·2% (82 to 416·8%)   |                          |
|                                         |                             | Qatar                        | 27·5% (11·3–45·9%)           | 37% (-16·4 to 119·2%)    | 112·23 (29·3–285·75)    | 41·8% (-13·2 to 138·1%) |                          |
|                                         |                             | Saudi Arabia                 | 24·4% (10·8–40·6%)           | 84·2% (48·9 to 167·3%)   | 95·29 (26·63–234·48)    | 80·6% (39 to 174·5%)    |                          |
|                                         |                             | Syrian Arab Republic         | 17·5% (7·4–31·1%)            | 36·8% (16·1 to 84·3%)    | 68·58 (17·58–180·38)    | 40·9% (9·3 to 102·4%)   |                          |
|                                         |                             | Tunisia                      | 18% (7·5–32·7%)              | 52·2% (30·2 to 105·3%)   | 72·18 (19·82–179·51)    | 48·9% (17·9 to 112·6%)  |                          |
|                                         |                             | Türkiye                      | 21·3% (9–37·4%)              | 39·6% (20·5 to 75·9%)    | 84·41 (23·5–206·24)     | 36·6% (11·8 to 80·2%)   |                          |
|                                         |                             | United Arab Emirates         | 25·5% (11·1–42·2%)           | 52·3% (15 to 114%)       | 93·74 (25·63–237·23)    | 44·3% (5·6 to 112·7%)   |                          |
|                                         |                             | Yemen                        | 7·2% (2·3–15·2%)             | 65·3% (19·6 to 213·5%)   | 27·67 (6·2–78·56)       | 64·4% (16·9 to 217·1%)  |                          |
|                                         |                             | Afghanistan                  | 11·5% (4·5–21·7%)            | 74·4% (37 to 194·4%)     | 49·88 (12·56–130·16)    | 67·8% (26 to 184·2%)    |                          |
|                                         |                             | Sudan                        | 14·8% (6·1–26·7%)            | 132·5% (70·9 to 311·6%)  | 54·26 (14·57–141·73)    | 123·6% (61·7 to 300·4%) |                          |
|                                         | High fasting plasma glucose | Stroke                       | Global                       | 20·1% (13·7–29·2%)       | 39·3% (31·8 to 48·7%)   | 354·95 (241·94–512·1)   | -9·8% (-17·6 to -0·5%)   |
|                                         |                             |                              | North Africa and Middle East | 27·6% (17·7–42·8%)       | 98·2% (68·5 to 132%)    | 504·87 (318·82–793·93)  | 34·8% (7·9 to 64·8%)     |
|                                         |                             |                              | Algeria                      | 30·6% (18·6–51·1%)       | 90·8% (48·2 to 148·3%)  | 536·74 (315·17–918·49)  | 5·9% (-25·1 to 46·9%)    |
|                                         |                             |                              | Bahrain                      | 30·7% (19·8–47·9%)       | -1·8% (-16·7 to 14·5%)  | 289·49 (179·88–474·58)  | -53·2% (-64·3 to -40·1%) |
| Egypt                                   |                             |                              | 24·6% (15–39·5%)             | 258·7% (159·5 to 388·6%) | 526·74 (295·21–920·94)  | 132·5% (50·4 to 233·2%) |                          |
| Iran                                    |                             |                              | 27·9% (16·5–46·7%)           | 94·3% (67·6 to 125·1%)   | 352·2 (207·74–596·84)   | 5·7% (-13·3 to 29·2%)   |                          |
| Iraq                                    |                             |                              | 30·3% (20·1–44·2%)           | 55·2% (21·4 to 100·1%)   | 884·45 (563·87–1343·07) | 25% (-12·1 to 74·3%)    |                          |

**Table S15** Burden of neurological conditions attributable to risk factors in North Africa and Middle East countries

| Risk factors              | Causes               | Locations                    | DALYs (95% UI)          |                         |                          |                          |
|---------------------------|----------------------|------------------------------|-------------------------|-------------------------|--------------------------|--------------------------|
|                           |                      |                              | PAF (%)                 | PAF change (%)          | Rate per 100,000         | Rate change (%)          |
|                           |                      |                              | 2019                    | From 1990 to 2019       | 2019                     | From 1990 to 2019        |
| Ischaemic stroke          |                      | Jordan                       | 29.9% (18–47.8%)        | 19.6% (-5 to 50%)       | 432.51 (257.92–673.15)   | -40.4% (-55.6 to -20.8%) |
|                           |                      | Kuwait                       | 30% (19.4–46.4%)        | 6.3% (-10.5 to 30.3%)   | 281.08 (178.13–446.73)   | -6% (-26.1 to 22.2%)     |
|                           |                      | Lebanon                      | 31.1% (18.8–53%)        | 61.9% (26.6 to 115.5%)  | 234.26 (122.75–400.57)   | 7.4% (-25.7 to 51.7%)    |
|                           |                      | Libya                        | 32% (20.1–51.7%)        | 54.7% (27.9 to 98.5%)   | 502.49 (284.86–866.15)   | 21.6% (-9.8 to 69.8%)    |
|                           |                      | Morocco                      | 32% (19.6–51.7%)        | 139% (78.9 to 210.3%)   | 720.21 (429.3–1202.06)   | 97.7% (40.1 to 173.2%)   |
|                           |                      | Palestine                    | 34.4% (20.4–57.2%)      | 42.5% (16.1 to 82.3%)   | 733.55 (439.8–1237.84)   | -3.8% (-30.7 to 35.6%)   |
|                           |                      | Oman                         | 31.8% (19.5–51.3%)      | 88.5% (42.9 to 146.5%)  | 600.57 (370.26–978.15)   | 15.7% (-20.5 to 73.4%)   |
|                           |                      | Qatar                        | 29.7% (19.5–45.8%)      | -2.1% (-17.6 to 16.9%)  | 269.33 (169.1–439.41)    | -45.8% (-61.2 to -25.7%) |
|                           |                      | Saudi Arabia                 | 29.9% (20.7–43.3%)      | 32.9% (4.9 to 69.2%)    | 631.39 (410.47–929.63)   | -5.6% (-34.8 to 38.4%)   |
|                           |                      | Syrian Arab Republic         | 29.2% (19.1–44.6%)      | 94.8% (55.9 to 148.4%)  | 589.86 (365.59–968.3)    | 16.6% (-19.6 to 70.1%)   |
|                           |                      | Tunisia                      | 31.8% (19.1–52.3%)      | 55.4% (24.6 to 95.4%)   | 470.33 (273.47–802.48)   | 17.2% (-18.8 to 69.6%)   |
|                           |                      | Türkiye                      | 22.2% (13.7–36%)        | 64.1% (29.1 to 112%)    | 258.96 (153.12–425.83)   | 25.4% (-15.5 to 76.3%)   |
|                           |                      | United Arab Emirates         | 30.5% (19.9–45.6%)      | 1.3% (-16.8 to 23.2%)   | 588.3 (353.82–922.63)    | -45.2% (-60.5 to -26%)   |
|                           |                      | Yemen                        | 22.7% (13.2–36.6%)      | 109.5% (53.1 to 175.4%) | 626.88 (351.01–1071.41)  | 58.1% (6.2 to 130.7%)    |
|                           |                      | Afghanistan                  | 32.8% (22.2–47.9%)      | 87.2% (47.4 to 142.4%)  | 1146.74 (695.29–1821.28) | 46.5% (1.9 to 107%)      |
|                           |                      | Sudan                        | 30.6% (19.3–48.6%)      | 118.6% (64.7 to 189.1%) | 789.95 (460.45–1335.49)  | 46.2% (3.8 to 110.5%)    |
|                           |                      | Global                       | 21.8% (11.6–40.4%)      | 33.5% (25.8 to 42.6%)   | 173.97 (90.51–316.3)     | -4.6% (-13.2 to 5%)      |
|                           |                      | North Africa and Middle East | 29.9% (15.7–53%)        | 83.6% (61.2 to 111.5%)  | 353.76 (190.41–627.47)   | 67.7% (38.9 to 103.2%)   |
|                           |                      | Algeria                      | 32.1% (17–60.5%)        | 82.5% (40.7 to 140.2%)  | 408.83 (207.37–775.79)   | 37.7% (-0.4 to 92%)      |
|                           |                      | Bahrain                      | 31.4% (17.4–57.5%)      | -6.2% (-21.2 to 14.5%)  | 193.44 (101.06–355.48)   | -47.2% (-60.3 to -32.3%) |
|                           |                      | Egypt                        | 28.1% (14.3–50.5%)      | 179.5% (99 to 278%)     | 388.95 (186.85–733.84)   | 219.1% (105.1 to 359.6%) |
|                           |                      | Iran                         | 29.1% (15–53.9%)        | 94.6% (68.1 to 124.4%)  | 287.01 (145.27–533.19)   | 11.7% (-9 to 36.4%)      |
|                           |                      | Iraq                         | 32% (18.2–54.6%)        | 51.2% (15.9 to 97.3%)   | 585.61 (327.82–1009.38)  | 40.7% (-0.5 to 96.4%)    |
|                           |                      | Jordan                       | 30.6% (15.9–53.8%)      | 16.8% (-6.8 to 47.3%)   | 331.46 (170.55–568.24)   | -37.3% (-53 to -17.1%)   |
|                           |                      | Kuwait                       | 31.1% (17.8–54.2%)      | 2% (-14.3 to 25.3%)     | 200.83 (110.84–352.13)   | -10.2% (-29 to 17.6%)    |
|                           |                      | Lebanon                      | 32.4% (17.2–59.2%)      | 54.2% (21.3 to 109.1%)  | 194 (91.25–359.7)        | 31.1% (-9.1 to 87%)      |
|                           |                      | Libya                        | 34.1% (17.9–61.4%)      | 34.2% (11 to 74.2%)     | 382.74 (195.84–732.45)   | 49% (9.4 to 114.4%)      |
|                           |                      | Morocco                      | 33.5% (16.7–60.8%)      | 126.3% (75 to 188%)     | 535.04 (269.99–989.58)   | 167.7% (89.7 to 264.6%)  |
|                           |                      | Palestine                    | 35.1% (17.4–66%)        | 38.3% (14.7 to 77.1%)   | 559.14 (277.77–1051.09)  | 13.8% (-15.5 to 59.9%)   |
|                           |                      | Oman                         | 33.5% (17–62.5%)        | 83.1% (42.3 to 136.2%)  | 433.23 (214.32–799.7)    | 49.8% (4.6 to 120.5%)    |
|                           |                      | Qatar                        | 30.1% (16.9–55.6%)      | -8.6% (-24.7 to 13.9%)  | 174.18 (95.91–335.88)    | -41% (-57.4 to -17.7%)   |
|                           |                      | Saudi Arabia                 | 30.7% (17.8–51.3%)      | 26.6% (-5 to 68.5%)     | 399.14 (223.95–669.16)   | 4.8% (-30.8 to 55.8%)    |
|                           | Syrian Arab Republic | 32.5% (16.5–58.8%)           | 79.3% (43.2 to 130.7%)  | 347.95 (171.61–688.58)  | 34.5% (-7.6 to 93.9%)    |                          |
|                           | Tunisia              | 33.1% (16.9–60.8%)           | 43% (15.4 to 82.4%)     | 361.23 (182.79–667.65)  | 49.2% (4.9 to 113.5%)    |                          |
|                           | Türkiye              | 24.1% (12–47.1%)             | 60.4% (25.4 to 111.2%)  | 159.78 (77–316.14)      | 47.5% (-2.2 to 108.7%)   |                          |
|                           | United Arab Emirates | 31.2% (18.2–51.6%)           | -2.8% (-21.4 to 22.6%)  | 442.31 (244.94–758.6)   | -35.6% (-53.4 to -9.1%)  |                          |
|                           | Yemen                | 24.6% (11.8–47.4%)           | 103.8% (54.1 to 160.2%) | 422.47 (193.65–847.83)  | 144% (69.9 to 245.1%)    |                          |
|                           | Afghanistan          | 34.6% (18.3–61.4%)           | 71.1% (38.1 to 123.7%)  | 645.43 (332.72–1187.73) | 118.4% (56.6 to 211.1%)  |                          |
|                           | Sudan                | 32.8% (16.5–59.5%)           | 99.3% (49.5 to 167.6%)  | 554.33 (271.37–1092.51) | 115.5% (53.4 to 218.4%)  |                          |
| Intracerebral haemorrhage |                      | Global                       | 18.9% (12.1–26.9%)      | 42.2% (33.6 to 53.4%)   | 157.42 (99.86–227.19)    | -9.9% (-20.4 to 0.7%)    |
|                           |                      | North Africa and Middle East | 24.2% (15.6–33.9%)      | 94.8% (68.2 to 126.8%)  | 132.49 (81.9–191.04)     | -5.9% (-23.4 to 18.3%)   |
|                           |                      | Algeria                      | 27% (17.5–38.9%)        | 86.5% (48.6 to 133.3%)  | 109.19 (64.16–169.56)    | -40% (-57.8 to -12.6%)   |
|                           |                      | Bahrain                      | 30.4% (19.9–43.1%)      | 0.3% (-15.7 to 19.8%)   | 80.65 (48.8–123.82)      | -64% (-73.3 to -50%)     |
|                           |                      | Egypt                        | 19.2% (11–29.8%)        | 233.7% (130.6 to 379%)  | 124 (62.65–227.74)       | 35.8% (-15.2 to 110.3%)  |
|                           |                      | Iran                         | 23.5% (14.7–34.4%)      | 91% (64.9 to 122.7%)    | 52.5 (32.92–77.66)       | -11.4% (-29.4 to 11.8%)  |
|                           |                      | Iraq                         | 27.6% (17.8–38.8%)      | 55.6% (22.6 to 95.5%)   | 281.93 (168.6–408.57)    | 8.8% (-26.4 to 58.6%)    |

**Table S15** Burden of neurological conditions attributable to risk factors in North Africa and Middle East countries

| Risk factors             | Causes               | Locations                    | DALYs (95% UI)          |                          |                         |                          |
|--------------------------|----------------------|------------------------------|-------------------------|--------------------------|-------------------------|--------------------------|
|                          |                      |                              | PAF (%)                 | PAF change (%)           | Rate per 100,000        | Rate change (%)          |
|                          |                      |                              | 2019                    | From 1990 to 2019        | 2019                    | From 1990 to 2019        |
| Subarachnoid haemorrhage |                      | Jordan                       | 28.2% (17.8–40.2%)      | 25.3% (-1.3 to 58.1%)    | 91.89 (54.66–139.43)    | -49.8% (-63.6 to -30.7%) |
|                          |                      | Kuwait                       | 27.7% (18.3–39.5%)      | 14.6% (-6.1 to 41%)      | 68.31 (42.48–102.39)    | 9.8% (-19.4 to 49%)      |
|                          |                      | Lebanon                      | 26.6% (16.8–38.6%)      | 58.9% (26 to 105.9%)     | 34.31 (19.07–56.99)     | -42.7% (-61.6 to -14.7%) |
|                          |                      | Libya                        | 27.6% (17.3–39.9%)      | 57.3% (23.5 to 114.3%)   | 104 (57.93–163.49)      | -23.1% (-47.2 to 16.2%)  |
|                          |                      | Morocco                      | 28.8% (17.2–41.5%)      | 134.3% (85.9 to 195.1%)  | 159.46 (90.94–244.04)   | 15% (-21.6 to 69.3%)     |
|                          |                      | Palestine                    | 32.9% (19.9–47.9%)      | 46.4% (20 to 87.2%)      | 160.67 (93.5–243.23)    | -36.6% (-55.9 to -6.9%)  |
|                          |                      | Oman                         | 29.4% (18–42.9%)        | 81.1% (41.3 to 134.3%)   | 148.16 (87.55–220.95)   | -27.3% (-49.2 to 10%)    |
|                          |                      | Qatar                        | 29.3% (19.2–42.8%)      | 3.8% (-14.3 to 28%)      | 71.34 (44.13–114)       | -54.6% (-68.8 to -33.4%) |
|                          |                      | Saudi Arabia                 | 28.8% (18.8–40.7%)      | 38.6% (7.4 to 76.2%)     | 220.73 (135.31–329.71)  | -18.5% (-46.5 to 23.6%)  |
|                          |                      | Syrian Arab Republic         | 26.9% (17.1–39.2%)      | 91.2% (51.6 to 144.3%)   | 226.81 (130.87–362.17)  | -1.1% (-34.3 to 50%)     |
|                          |                      | Tunisia                      | 28.9% (18.2–42%)        | 59.2% (25.9 to 97.7%)    | 93.11 (52.02–146.87)    | -30.6% (-53.3 to 7.7%)   |
|                          |                      | Türkiye                      | 20.6% (12.7–31.1%)      | 63.8% (31.7 to 112.2%)   | 82.05 (48.44–126.47)    | 3.3% (-32.2 to 50.2%)    |
|                          |                      | United Arab Emirates         | 29.1% (19.3–40.8%)      | 3.9% (-17 to 29.4%)      | 131.05 (73.7–220.16)    | -62.7% (-75.3 to -42.9%) |
|                          |                      | Yemen                        | 19.7% (11.1–30.4%)      | 94.3% (48.8 to 154.7%)   | 174.22 (87.21–282.99)   | -10% (-39.8 to 37.8%)    |
|                          |                      | Afghanistan                  | 30.9% (18.8–44.3%)      | 89.8% (50.5 to 148.4%)   | 430.86 (233.25–680.35)  | 2.4% (-28.5 to 50%)      |
|                          |                      | Sudan                        | 26.8% (16.2–38.8%)      | 113.2% (68.1 to 174.3%)  | 206.16 (111.72–332.58)  | -16.1% (-41.7 to 21.2%)  |
|                          |                      | Global                       | 17.3% (11.3–24.3%)      | 40.5% (30.8 to 52%)      | 23.57 (14.85–33.87)     | -35.7% (-45.2 to -13.8%) |
|                          |                      | North Africa and Middle East | 19.8% (12.9–28.3%)      | 121.7% (80.7 to 199.7%)  | 18.61 (11.36–27.18)     | -18.1% (-41.7 to 32.6%)  |
|                          |                      | Algeria                      | 24.3% (15.8–34.9%)      | 90.2% (50.5 to 144%)     | 18.73 (10.74–28.91)     | -32.9% (-56.4 to 9.5%)   |
|                          |                      | Bahrain                      | 24.5% (15.4–35.7%)      | 29% (1.7 to 65.1%)       | 15.4 (8.99–25.83)       | -46% (-66.6 to -18.1%)   |
|                          |                      | Egypt                        | 12.1% (6.7–19.2%)       | 345.8% (161.4 to 889.4%) | 13.79 (6.88–23.98)      | 3% (-46.1 to 116.4%)     |
|                          |                      | Iran                         | 23.3% (14.8–33.6%)      | 70.2% (45.7 to 106.1%)   | 12.69 (7.83–18.27)      | -25% (-49.2 to 22.3%)    |
|                          |                      | Iraq                         | 23.5% (15.1–32.8%)      | 47.8% (15.1 to 86.2%)    | 16.91 (9.76–27.04)      | -47.1% (-67.3 to -5.6%)  |
|                          |                      | Jordan                       | 23.5% (15.4–33.3%)      | 23% (-1.4 to 53%)        | 9.16 (5.53–13.74)       | -38.4% (-59.3 to -8.4%)  |
|                          |                      | Kuwait                       | 25.4% (16.9–35.4%)      | 38.8% (14.7 to 68.9%)    | 11.94 (7.42–17.2)       | -9.6% (-32.7 to 25.1%)   |
|                          |                      | Lebanon                      | 22.3% (13.9–31.9%)      | 62.2% (24.1 to 111%)     | 5.95 (3.33–9.75)        | -42.3% (-68.3 to 5.7%)   |
|                          |                      | Libya                        | 22% (13.5–33.4%)        | 123.2% (49 to 266.7%)    | 15.76 (8.64–26.31)      | -25.2% (-53.5 to 29.7%)  |
|                          |                      | Morocco                      | 25.6% (15.6–38%)        | 143.7% (88.6 to 223.2%)  | 25.7 (13.56–41.84)      | -0.2% (-37.9 to 87.8%)   |
|                          |                      | Palestine                    | 27.4% (16.9–39.5%)      | 47.3% (17.5 to 92.5%)    | 13.74 (8.31–20.75)      | -20.7% (-48.5 to 30.4%)  |
|                          |                      | Oman                         | 21.3% (13–30.9%)        | 93.2% (44.6 to 167.3%)   | 19.18 (8.99–33.41)      | -26.7% (-59.4 to 38.4%)  |
|                          |                      | Qatar                        | 28.5% (18.2–40.9%)      | 17.2% (-7.7 to 49.2%)    | 23.81 (14.08–36.93)     | -46.7% (-69.9 to -5.7%)  |
|                          |                      | Saudi Arabia                 | 23.3% (15.2–33%)        | 40% (11.4 to 75.5%)      | 11.52 (6.55–17.79)      | -33.7% (-64.4 to 18.3%)  |
|                          | Syrian Arab Republic | 13.8% (8.3–20.6%)            | 148.2% (72.6 to 285.6%) | 15.1 (8.73–24.5)         | -14.3% (-48.5 to 55.2%) |                          |
|                          | Tunisia              | 24.8% (15.8–35.8%)           | 72.8% (34 to 125.4%)    | 15.99 (9.1–26.23)        | -36.1% (-63.1 to 22.2%) |                          |
|                          | Türkiye              | 17% (11–24.6%)               | 53% (26.8 to 96.1%)     | 17.13 (10.35–25.76)      | -8.4% (-45.5 to 75.1%)  |                          |
|                          | United Arab Emirates | 24.5% (15.8–34.4%)           | 18% (-6.5 to 49.7%)     | 14.93 (6.58–26.85)       | -57.9% (-74.5 to -28%)  |                          |
|                          | Yemen                | 18.2% (10.4–28.6%)           | 98.6% (49.4 to 164.3%)  | 30.2 (12.22–61.89)       | 0.7% (-34.6 to 70.8%)   |                          |
|                          | Afghanistan          | 29.8% (17.9–43.7%)           | 90.9% (45.1 to 155.9%)  | 70.45 (21.02–143.13)     | 6.6% (-30.4 to 81.1%)   |                          |
|                          | Sudan                | 23.9% (14.3–35.1%)           | 121.3% (68.1 to 207.8%) | 29.47 (13.35–54.84)      | -21.4% (-50.9 to 56%)   |                          |
| Neurological disorders*  |                      | Global                       | 2.7% (0.5–7.4%)         | 35.8% (28.6 to 49.2%)    | 32.84 (5.53–105.88)     | 34% (28 to 47.7%)        |
|                          |                      | North Africa and Middle East | 3.5% (0.6–9.7%)         | 66.6% (54.4 to 89.3%)    | 48.25 (8.67–151.54)     | 59.1% (47.1 to 88.7%)    |
|                          |                      | Algeria                      | 4.3% (0.7–11.9%)        | 73.1% (50.1 to 114.4%)   | 58.32 (10.65–189.14)    | 56.6% (34.7 to 91.6%)    |
|                          |                      | Bahrain                      | 6.9% (1.4–17.8%)        | 61.5% (34 to 111.8%)     | 94.76 (18.78–285.18)    | 47.2% (25.7 to 81.8%)    |
|                          |                      | Egypt                        | 3% (0.5–8.4%)           | 93% (54.9 to 164.8%)     | 38.5 (6.66–124.65)      | 93.9% (59.1 to 165.6%)   |
|                          |                      | Iran                         | 3.4% (0.6–9.4%)         | 78.9% (64 to 107.2%)     | 46.91 (8.43–146.09)     | 70.5% (57.1 to 113.5%)   |
|                          |                      | Iraq                         | 4.3% (0.8–12.2%)        | 58% (36.1 to 93.9%)      | 56.16 (10.27–175.37)    | 54.7% (36.1 to 87.2%)    |
|                          |                      | Jordan                       | 4.1% (0.7–11.5%)        | 34.4% (14.4 to 62.3%)    | 51.89 (9.32–162.62)     | 27.1% (9.2 to 57.1%)     |
|                          |                      | Kuwait                       | 5.5% (1.1–14.5%)        | 38.9% (18.2 to 75.5%)    | 69.25 (13.22–210.56)    | 32% (17 to 58.8%)        |
|                          |                      | Lebanon                      | 4.3% (0.8–11.8%)        | 58% (36.7 to 101%)       | 57.08 (10.16–187.23)    | 51.7% (32.9 to 109.5%)   |
|                          |                      | Libya                        | 5% (0.9–13.4%)          | 65.6% (42.3 to 101.5%)   | 67.68 (12.26–213.84)    | 60.6% (35.8 to 100.8%)   |

**Table S15** Burden of neurological conditions attributable to risk factors in North Africa and Middle East countries

| Risk factors                            | Causes      | Locations                    | DALYs (95% UI)        |                         |                        |                          |
|-----------------------------------------|-------------|------------------------------|-----------------------|-------------------------|------------------------|--------------------------|
|                                         |             |                              | PAF (%)               | PAF change (%)          | Rate per 100,000       | Rate change (%)          |
|                                         |             |                              | 2019                  | From 1990 to 2019       | 2019                   | From 1990 to 2019        |
| Alzheimer's disease and other dementias |             | Morocco                      | 3·8% (0·7–10·7%)      | 71·4% (48 to 109·1%)    | 50·39 (8·76–159·88)    | 74·8% (54·5 to 105·9%)   |
|                                         |             | Palestine                    | 4·4% (0·8–12·1%)      | 69·1% (43·1 to 110·5%)  | 59·56 (10·71–192·14)   | 60% (35·4 to 100·6%)     |
|                                         |             | Oman                         | 4·3% (0·8–11·6%)      | 57·9% (35 to 102·1%)    | 57·6 (10·31–187·17)    | 59·6% (36·1 to 117·3%)   |
|                                         |             | Qatar                        | 7·4% (1·5–19·2%)      | 59·5% (23·7 to 133·5%)  | 100·36 (18·79–302·85)  | 56·9% (20·5 to 124·5%)   |
|                                         |             | Saudi Arabia                 | 4·6% (0·9–12·6%)      | 47% (23·4 to 89·1%)     | 65·03 (12–204·81)      | 46·8% (25·6 to 93·8%)    |
|                                         |             | Syrian Arab Republic         | 4% (0·7–11·3%)        | 53·1% (31·6 to 89·8%)   | 52·33 (9·2–176·09)     | 55·7% (29·4 to 104·9%)   |
|                                         |             | Tunisia                      | 4·6% (0·8–12·6%)      | 61·6% (39 to 98·5%)     | 60·55 (11·24–188·59)   | 57·5% (32·1 to 108·1%)   |
|                                         |             | Türkiye                      | 2·9% (0·5–8·1%)       | 53·8% (28·7 to 90·4%)   | 42·17 (7·24–138·49)    | 39% (19·8 to 68·1%)      |
|                                         |             | United Arab Emirates         | 5% (1–13·4%)          | 39·6% (15·8 to 81·6%)   | 71·71 (12·97–221·63)   | 29·8% (9·7 to 67·1%)     |
|                                         |             | Yemen                        | 2·9% (0·5–8·3%)       | 61·7% (38·9 to 98·7%)   | 37·64 (6·28–123·82)    | 57·5% (36·3 to 92·7%)    |
|                                         |             | Afghanistan                  | 4·1% (0·7–11·4%)      | 82·1% (57·3 to 128·5%)  | 62·39 (10·88–199·36)   | 62·9% (42·7 to 91·9%)    |
|                                         |             | Sudan                        | 3·7% (0·6–10·6%)      | 80·2% (55 to 123·4%)    | 49·93 (8·96–154·84)    | 66·7% (50·4 to 97·2%)    |
|                                         |             | Global                       | 9·7% (2·2–20·7%)      | 29·3% (24·7 to 39·7%)   | 32·84 (5·53–105·88)    | 34% (28 to 47·7%)        |
|                                         |             | North Africa and Middle East | 12·4% (3–25·9%)       | 61% (52·2 to 77%)       | 48·25 (8·67–151·54)    | 59·1% (47·1 to 88·7%)    |
|                                         |             | Algeria                      | 14·5% (3·6–29·8%)     | 65·2% (53 to 86·6%)     | 58·32 (10·65–189·14)   | 56·6% (34·7 to 91·6%)    |
|                                         |             | Bahrain                      | 23·4% (6·7–44·2%)     | 53·3% (40 to 76·8%)     | 94·76 (18·78–285·18)   | 47·2% (25·7 to 81·8%)    |
|                                         |             | Egypt                        | 10·6% (2·5–22·9%)     | 94·1% (66·6 to 152·9%)  | 38·5 (6·66–124·65)     | 93·9% (59·1 to 165·6%)   |
|                                         |             | Iran                         | 12·1% (2·9–25·4%)     | 70·8% (60·3 to 88·1%)   | 46·91 (8·43–146·09)    | 70·5% (57·1 to 113·5%)   |
|                                         |             | Iraq                         | 14·7% (3·7–30·1%)     | 52% (39·4 to 72·8%)     | 56·16 (10·27–175·37)   | 54·7% (36·1 to 87·2%)    |
|                                         |             | Jordan                       | 14% (3·5–28·8%)       | 33·1% (22·6 to 51·6%)   | 51·89 (9·32–162·62)    | 27·1% (9·2 to 57·1%)     |
|                                         |             | Kuwait                       | 17·8% (4·7–35·7%)     | 35·4% (24·2 to 58·3%)   | 69·25 (13·22–210·56)   | 32% (17 to 58·8%)        |
|                                         |             | Lebanon                      | 14·4% (3·6–29·6%)     | 55·4% (45·5 to 72·7%)   | 57·08 (10·16–187·23)   | 51·7% (32·9 to 109·5%)   |
|                                         |             | Libya                        | 16·3% (4·1–33%)       | 67·2% (54·9 to 88·9%)   | 67·68 (12·26–213·84)   | 60·6% (35·8 to 100·8%)   |
|                                         |             | Morocco                      | 13% (3·1–27%)         | 74·5% (62 to 95·7%)     | 50·39 (8·76–159·88)    | 74·8% (54·5 to 105·9%)   |
|                                         |             | Palestine                    | 15·3% (3·8–31%)       | 67% (51·7 to 95%)       | 59·56 (10·71–192·14)   | 60% (35·4 to 100·6%)     |
|                                         |             | Oman                         | 13·6% (3·3–28·2%)     | 65% (52·6 to 93·6%)     | 57·6 (10·31–187·17)    | 59·6% (36·1 to 117·3%)   |
|                                         |             | Qatar                        | 24·6% (6·6–46·8%)     | 51·8% (23·9 to 109·7%)  | 100·36 (18·79–302·85)  | 56·9% (20·5 to 124·5%)   |
|                                         |             | Saudi Arabia                 | 16·7% (4·3–33·4%)     | 50·1% (40·6 to 69·4%)   | 65·03 (12–204·81)      | 46·8% (25·6 to 93·8%)    |
|                                         |             | Syrian Arab Republic         | 13·3% (3·3–27·9%)     | 51·1% (40·7 to 72·2%)   | 52·33 (9·2–176·09)     | 55·7% (29·4 to 104·9%)   |
|                                         |             | Tunisia                      | 15·1% (3·8–30·6%)     | 61·2% (50·8 to 80·4%)   | 60·55 (11·24–188·59)   | 57·5% (32·1 to 108·1%)   |
|                                         |             | Türkiye                      | 10·6% (2·5–22·5%)     | 41·7% (29·6 to 59·6%)   | 42·17 (7·24–138·49)    | 39% (19·8 to 68·1%)      |
|                                         |             | United Arab Emirates         | 19·5% (5·2–38·9%)     | 37·5% (23·3 to 66·1%)   | 71·71 (12·97–221·63)   | 29·8% (9·7 to 67·1%)     |
|                                         | Yemen       | 9·8% (2·2–20·7%)             | 57·8% (44·2 to 87·5%) | 37·64 (6·28–123·82)     | 57·5% (36·3 to 92·7%)  |                          |
|                                         | Afghanistan | 14·4% (3·6–29·7%)            | 69·3% (57·3 to 89·4%) | 62·39 (10·88–199·36)    | 62·9% (42·7 to 91·9%)  |                          |
|                                         | Sudan       | 13·6% (3·4–28·3%)            | 73·7% (61·5 to 95·4%) | 49·93 (8·96–154·84)     | 66·7% (50·4 to 97·2%)  |                          |
| High LDL cholesterol                    | Stroke      | Global                       | 9·6% (5·3–16·6%)      | 5·5% (0·1 to 13·4%)     | 170·21 (92·8–294·74)   | -31·7% (-37·3 to -23·9%) |
|                                         |             | North Africa and Middle East | 15% (9·1–24·8%)       | 45·8% (34·3 to 56·5%)   | 274·69 (160·6–448·12)  | -0·9% (-14 to 13·7%)     |
|                                         |             | Algeria                      | 15·5% (8·3–26·8%)     | 49·8% (35 to 70%)       | 271·99 (137·65–493·84) | -16·8% (-32·6 to 5·3%)   |
|                                         |             | Bahrain                      | 15·5% (7·5–28·1%)     | 15·3% (3·7 to 25·7%)    | 145·63 (68·11–271·24)  | -45·2% (-55·6 to -34%)   |
|                                         |             | Egypt                        | 15·3% (9·7–23·9%)     | 126·6% (69·6 to 178·3%) | 325·37 (192·55–531·13) | 46·2% (9·2 to 91%)       |
|                                         |             | Iran                         | 18·6% (10·8–31%)      | 2·3% (-3·3 to 6·4%)     | 234·35 (135·13–399·73) | -44·4% (-50·7 to -37·5%) |
|                                         |             | Iraq                         | 14·2% (8·3–24·4%)     | 18·1% (6·1 to 28·7%)    | 415·34 (234·43–709·93) | -4·9% (-26·6 to 19·7%)   |
|                                         |             | Jordan                       | 18·3% (9·8–31·8%)     | 13·7% (4·5 to 21·3%)    | 264·81 (137·4–468·41)  | -43·4% (-53·7 to -32·7%) |
|                                         |             | Kuwait                       | 17·5% (10–29·5%)      | 0·6% (-8·3 to 8·9%)     | 164·01 (90·33–282·08)  | -11% (-24·9 to 3·1%)     |
|                                         |             | Lebanon                      | 21·6% (12·4–35·3%)    | 44·1% (31·7 to 63·9%)   | 162·52 (86·17–271·76)  | -4·6% (-25·1 to 21%)     |
|                                         |             | Libya                        | 17·6% (11·3–27·8%)    | 83% (56·5 to 115·5%)    | 277·11 (162·63–451·78) | 43·8% (12·1 to 94·4%)    |
|                                         |             | Morocco                      | 16·7% (9·8–28%)       | 53·2% (37·3 to 74·7%)   | 378·2 (204·88–661·87)  | 27·1% (-1·6 to 60·2%)    |
|                                         |             | Palestine                    | 16·4% (8·5–30%)       | 22·8% (13·1 to 30·8%)   | 350·07 (174·72–627·82) | -17·1% (-34·8 to 4·3%)   |
|                                         |             | Oman                         | 16% (7·8–29·3%)       | 43·4% (14·7 to 67·9%)   | 302·42 (146·31–570·66) | -12% (-36·5 to 17·2%)    |
|                                         |             | Qatar                        | 13·2% (6–25·3%)       | 14·8% (-8·7 to 30·9%)   | 119·39 (51·45–239·46)  | -36·5% (-53·2 to -19·2%) |

**Table S15** Burden of neurological conditions attributable to risk factors in North Africa and Middle East countries

| Risk factors                 | Causes                       | Locations                    | DALYs (95% UI)     |                         |                          |                          |
|------------------------------|------------------------------|------------------------------|--------------------|-------------------------|--------------------------|--------------------------|
|                              |                              |                              | PAF (%)            | PAF change (%)          | Rate per 100,000         | Rate change (%)          |
|                              |                              |                              | 2019               | From 1990 to 2019       | 2019                     | From 1990 to 2019        |
| Ischaemic stroke             |                              | Saudi Arabia                 | 14.7% (8.7–23.9%)  | 55.4% (36.9 to 82.2%)   | 310.63 (174.16–522.36)   | 10.2% (-18 to 52.2%)     |
|                              |                              | Syrian Arab Republic         | 12.9% (7.6–21.3%)  | 30.2% (16.2 to 42.3%)   | 259.54 (141.07–442.02)   | -22.2% (-43 to 2.5%)     |
|                              |                              | Tunisia                      | 17.2% (9.5–29.9%)  | 54.1% (39.1 to 75.8%)   | 254.39 (128.48–469.75)   | 16.1% (-12.4 to 56%)     |
|                              |                              | Türkiye                      | 11.5% (5.9–20.8%)  | 6.1% (-8.1 to 16.8%)    | 133.35 (65.42–251.59)    | -18.9% (-41.5 to 0.4%)   |
|                              |                              | United Arab Emirates         | 21.1% (12.9–34%)   | 48.9% (31.1 to 75.4%)   | 403.68 (232.63–670.13)   | -19.7% (-39.3 to 9.6%)   |
|                              |                              | Yemen                        | 14.4% (8.8–23.6%)  | 78.4% (57.1 to 107.4%)  | 399.06 (221.29–709.45)   | 34.7% (4.7 to 80.1%)     |
|                              |                              | Afghanistan                  | 13.2% (8.3–20.4%)  | 80.5% (56.9 to 106.7%)  | 461.25 (265.09–763.51)   | 41.3% (8.1 to 83.8%)     |
|                              |                              | Sudan                        | 13.6% (8.2–22.3%)  | 92.3% (65.4 to 122%)    | 351.21 (191.37–615.1)    | 28.8% (1.7 to 68.7%)     |
|                              |                              | Global                       | 21.3% (11.7–37%)   | -4.4% (-8.2 to 1.9%)    | 170.21 (92.8–294.74)     | -31.7% (-37.3 to -23.9%) |
|                              |                              | North Africa and Middle East | 23.2% (13.9–38.2%) | 8.5% (5 to 14.1%)       | 274.69 (160.6–448.12)    | -0.9% (-14 to 13.7%)     |
|                              |                              | Algeria                      | 21.3% (11.5–36.7%) | 10.3% (2 to 23.8%)      | 271.99 (137.65–493.84)   | -16.8% (-32.6 to 5.3%)   |
|                              |                              | Bahrain                      | 23.7% (11.6–43%)   | -2.5% (-12.1 to 3.9%)   | 145.63 (68.11–271.24)    | -45.2% (-55.6 to -34%)   |
|                              |                              | Egypt                        | 23.6% (15.1–37%)   | 28.3% (12.8 to 49.1%)   | 325.37 (192.55–531.13)   | 46.2% (9.2 to 91%)       |
|                              |                              | Iran                         | 23.8% (13.9–39.8%) | -3% (-7.7 to 0.4%)      | 234.35 (135.13–399.73)   | -44.4% (-50.7 to -37.5%) |
|                              |                              | Iraq                         | 22.7% (13.2–38.5%) | 2.3% (-8.3 to 9.5%)     | 415.34 (234.43–709.93)   | -4.9% (-26.6 to 19.7%)   |
|                              |                              | Jordan                       | 24.4% (13.2–42.5%) | 5.4% (-3.2 to 12.1%)    | 264.81 (137.4–468.41)    | -43.4% (-53.7 to -32.7%) |
|                              |                              | Kuwait                       | 25.4% (14.4–42.8%) | 1.1% (-6.5 to 6.5%)     | 164.01 (90.33–282.08)    | -11% (-24.9 to 3.1%)     |
|                              |                              | Lebanon                      | 27.2% (15.4–44.2%) | 12.5% (3.4 to 27.5%)    | 162.52 (86.17–271.76)    | -4.6% (-25.1 to 21%)     |
|                              |                              | Libya                        | 24.7% (15.7–38.8%) | 29.4% (16.4 to 50.4%)   | 277.11 (162.63–451.78)   | 43.8% (12.1 to 94.4%)    |
|                              |                              | Morocco                      | 23.5% (13.7–39.3%) | 7% (0.1 to 18.1%)       | 378.2 (204.88–661.87)    | 27.1% (-1.6 to 60.2%)    |
|                              |                              | Palestine                    | 22% (11.4–40%)     | 0.8% (-7.2 to 6.7%)     | 350.07 (174.72–627.82)   | -17.1% (-34.8 to 4.3%)   |
|                              |                              | Oman                         | 23.4% (11.4–42.7%) | 7.8% (-13.3 to 24.7%)   | 302.42 (146.31–570.66)   | -12% (-36.5 to 17.2%)    |
|                              |                              | Qatar                        | 20.7% (9.5–39.1%)  | -1.7% (-19.2 to 9.9%)   | 119.39 (51.45–239.46)    | -36.5% (-53.2 to -19.2%) |
|                              |                              | Saudi Arabia                 | 23.9% (14.3–39.3%) | 33.4% (21.7 to 54.7%)   | 310.63 (174.16–522.36)   | 10.2% (-18 to 52.2%)     |
|                              |                              | Syrian Arab Republic         | 24.2% (14.4–39.7%) | 3.8% (-4.7 to 11%)      | 259.54 (141.07–442.02)   | -22.2% (-43 to 2.5%)     |
|                              |                              | Tunisia                      | 23.3% (12.9–39.7%) | 11.5% (3.9 to 25.3%)    | 254.39 (128.48–469.75)   | 16.1% (-12.4 to 56%)     |
|                              |                              | Türkiye                      | 20.1% (10.3–36.3%) | -11.8% (-22.3 to -5.1%) | 133.35 (65.42–251.59)    | -18.9% (-41.5 to 0.4%)   |
|                              |                              | United Arab Emirates         | 28.6% (17.4–45.8%) | 21.4% (10.5 to 42.2%)   | 403.68 (232.63–670.13)   | -19.7% (-39.3 to 9.6%)   |
|                              |                              | Yemen                        | 23.2% (14–38.1%)   | 12.4% (3.9 to 28.8%)    | 399.06 (221.29–709.45)   | 34.7% (4.7 to 80.1%)     |
|                              |                              | Afghanistan                  | 24.8% (15.5–38.5%) | 10.7% (2.3 to 24.4%)    | 461.25 (265.09–763.51)   | 41.3% (8.1 to 83.8%)     |
|                              |                              | Sudan                        | 20.7% (12.2–34.5%) | 18.9% (9.4 to 36.3%)    | 351.21 (191.37–615.1)    | 28.8% (1.7 to 68.7%)     |
|                              | High systolic blood pressure | Stroke                       | Global             | 54.8% (47.5–61.5%)      | 5.5% (1.3 to 10.1%)      | 969.4 (823.77–1110.2)    |
| North Africa and Middle East |                              |                              | 52.8% (45.7–59.4%) | 10.5% (4.2 to 18.4%)    | 965.01 (800.6–1143.24)   | -24.9% (-34.3 to -12%)   |
| Algeria                      |                              |                              | 49.7% (40.9–58.5%) | -5.6% (-16.6 to 5.8%)   | 872.01 (662.49–1114.88)  | -47.7% (-59.3 to -34.5%) |
| Bahrain                      |                              |                              | 52.1% (43.5–61.1%) | 0% (-11.3 to 13.4%)     | 490.34 (383.49–626.76)   | -52.6% (-62.5 to -40.1%) |
| Egypt                        |                              |                              | 49.9% (42–56.6%)   | 59.4% (30 to 92.2%)     | 1068.48 (757.4–1481.37)  | 3.2% (-24.4 to 37.1%)    |
| Iran                         |                              |                              | 48.6% (40.7–56.1%) | 5.6% (1.9 to 9.4%)      | 612.89 (506.32–718.14)   | -42.7% (-48.8 to -33.6%) |
| Iraq                         |                              |                              | 62.3% (54.5–68.9%) | 7.8% (0 to 17.7%)       | 1822.71 (1421.5–2274.29) | -13.1% (-33.1 to 10%)    |
| Jordan                       |                              |                              | 52% (42.8–60.6%)   | 1.8% (-10.3 to 16.1%)   | 752.3 (585.1–924.87)     | -49.4% (-60.1 to -37.2%) |
| Kuwait                       |                              |                              | 51% (43.1–59%)     | 1.5% (-8.1 to 12.5%)    | 478.76 (375.24–590.88)   | -10.3% (-26.2 to 8.7%)   |
| Lebanon                      |                              |                              | 51.4% (43.1–59.6%) | 8.3% (-5.2 to 25.9%)    | 387.28 (281.36–503.42)   | -28.3% (-45.9 to -6.1%)  |
| Libya                        |                              |                              | 56.9% (48–64.3%)   | 14.5% (1.1 to 30.1%)    | 893.19 (668.38–1153.54)  | -9.9% (-30.1 to 17.9%)   |
| Morocco                      |                              |                              | 60.2% (51.3–68.3%) | -2.4% (-11.4 to 6.6%)   | 1360.9 (1030.45–1725.77) | -19.2% (-36.9 to 1.7%)   |
| Palestine                    |                              |                              | 46% (36.9–54.7%)   | -1.1% (-14 to 12.7%)    | 979.34 (759.63–1210.42)  | -33.3% (-48.8 to -13.4%) |
| Oman                         |                              |                              | 52.3% (43.2–60.6%) | 33.6% (15 to 58.7%)     | 986.42 (779.06–1209.09)  | -18.2% (-38.9 to 14%)    |



**Table S15** Burden of neurological conditions attributable to risk factors in North Africa and Middle East countries

| Risk factors              | Causes | Locations                    | DALYs (95% UI)     |                         |                           |                          |
|---------------------------|--------|------------------------------|--------------------|-------------------------|---------------------------|--------------------------|
|                           |        |                              | PAF (%)            | PAF change (%)          | Rate per 100,000          | Rate change (%)          |
|                           |        |                              | 2019               | From 1990 to 2019       | 2019                      | From 1990 to 2019        |
| Ischaemic stroke          |        | Qatar                        | 51.4% (42.9–59.9%) | 0.3% (-11.1 to 12.7%)   | 465.01 (351.86–606.99)    | -44.5% (-58 to -27.8%)   |
|                           |        | Saudi Arabia                 | 53.5% (45.7–61%)   | 6.5% (-3.8 to 19%)      | 1131.89 (852.23–1403.64)  | -24.5% (-44.5 to 3.1%)   |
|                           |        | Syrian Arab Republic         | 50.6% (42.6–58%)   | 9.3% (-3.5 to 24.1%)    | 1021.36 (756.66–1342.5)   | -34.7% (-52.5 to -9.3%)  |
|                           |        | Tunisia                      | 48.9% (40.2–57.2%) | 3.8% (-9.5 to 18.6%)    | 723.1 (510.79–965.68)     | -21.8% (-42.9 to 6.4%)   |
|                           |        | Türkiye                      | 52.8% (44.6–60.5%) | -0.4% (-8.9 to 8.4%)    | 614.52 (476.44–763.74)    | -23.9% (-44.4 to -4.9%)  |
|                           |        | United Arab Emirates         | 52.3% (43.6–60.1%) | -13% (-20.4 to -5.9%)   | 1008.2 (732.4–1350.36)    | -53% (-65 to -38.2%)     |
|                           |        | Yemen                        | 48.6% (40.3–56.3%) | 4.2% (-10.7 to 22%)     | 1344.79 (963.01–1816.73)  | -21.4% (-42 to 7.3%)     |
|                           |        | Afghanistan                  | 50.2% (41.7–58.3%) | 0.6% (-12.2 to 17.4%)   | 1759.25 (1176.54–2416.55) | -21.2% (-42.2 to 3.7%)   |
|                           |        | Sudan                        | 61.6% (54–68.4%)   | 10.7% (0.3 to 23.6%)    | 1592.13 (1151.53–2261.07) | -26% (-41.5 to -4.4%)    |
|                           |        | Global                       | 50.5% (40.3–60%)   | 0.3% (-3.6 to 4.5%)     | 403.74 (318.26–487.77)    | -28.3% (-34.4 to -22.1%) |
|                           |        | North Africa and Middle East | 51.3% (41.6–60.2%) | 8.4% (4.2 to 13.7%)     | 607.76 (477.75–734.53)    | -1.1% (-13.7 to 13.3%)   |
|                           |        | Algeria                      | 47.9% (37.2–59%)   | -3% (-14.3 to 10%)      | 611.38 (445.22–804.97)    | -27% (-42.9 to -6.3%)    |
|                           |        | Bahrain                      | 49.4% (38.5–61.2%) | -0.2% (-13.5 to 14.3%)  | 302.92 (225.87–407.53)    | -44% (-55.7 to -29.8%)   |
|                           |        | Egypt                        | 51% (40.9–59.5%)   | 39.4% (18.2 to 68.1%)   | 704.79 (490.52–973.72)    | 59% (13.3 to 113.7%)     |
|                           |        | Iran                         | 47.4% (37.9–56.5%) | 5.4% (2 to 9.5%)        | 466.36 (369.17–559.51)    | -39.7% (-46.5 to -30.5%) |
|                           |        | Iraq                         | 59.7% (49–69%)     | 7.9% (-0.4 to 19.3%)    | 1091.5 (829.66–1356.28)   | 0.4% (-20.5 to 27%)      |
|                           |        | Jordan                       | 50% (39.2–60.5%)   | 2.4% (-10.6 to 17.8%)   | 541.9 (403.77–685.87)     | -45% (-56.8 to -31.7%)   |
|                           |        | Kuwait                       | 49.3% (38.6–59.7%) | -0.5% (-10.8 to 11.6%)  | 318.54 (236.02–406.48)    | -12.4% (-28 to 5.6%)     |
|                           |        | Lebanon                      | 49.5% (39.6–58.8%) | 11.2% (-3.3 to 29.5%)   | 295.92 (205.28–388.42)    | -5.6% (-28.6 to 21.6%)   |
|                           |        | Libya                        | 56% (45.4–65%)     | 8.8% (-2.1 to 22.6%)    | 628.9 (458.21–827.55)     | 21% (-6 to 56.9%)        |
|                           |        | Morocco                      | 58.3% (47.3–68.3%) | -0.8% (-9.8 to 8.7%)    | 935.28 (694.8–1203.55)    | 17.5% (-9.1 to 46.3%)    |
|                           |        | Palestine                    | 44.2% (33.7–54.7%) | 0.5% (-13.5 to 16.1%)   | 702.63 (515.7–893.99)     | -17.4% (-36.7 to 7.1%)   |
|                           |        | Oman                         | 50.6% (39.5–60.8%) | 35% (14.4 to 61.8%)     | 652.76 (492.96–821.83)    | 10.2% (-19 to 52.7%)     |
|                           |        | Qatar                        | 48.6% (37.6–60.2%) | -0.4% (-13.2 to 13.6%)  | 280.61 (203.62–378.05)    | -35.8% (-50.9 to -17.4%) |
|                           |        | Saudi Arabia                 | 50.5% (40.3–60.2%) | 9.6% (-2.2 to 24.5%)    | 657.22 (476.95–832.66)    | -9.5% (-32.6 to 18.4%)   |
|                           |        | Syrian Arab Republic         | 48.9% (38.1–58.5%) | 5.3% (-7.8 to 20.8%)    | 523.13 (371.52–699.89)    | -21.1% (-44 to 8.3%)     |
|                           |        | Tunisia                      | 46.7% (36.3–56.7%) | 6.3% (-7.4 to 22%)      | 509.45 (351.47–692.66)    | 10.6% (-20.4 to 50.5%)   |
|                           |        | Türkiye                      | 49.3% (39–59.2%)   | -2% (-11.1 to 7.5%)     | 326.85 (242.04–422.27)    | -9.9% (-35.1 to 13.2%)   |
|                           |        | United Arab Emirates         | 50.2% (40.3–59.7%) | -12.2% (-19.5 to -4.5%) | 710.89 (520.32–916.74)    | -42% (-56 to -25%)       |
|                           |        | Yemen                        | 46% (35.7–56.1%)   | 7.5% (-8 to 27.1%)      | 790.54 (544.06–1095.57)   | 28.8% (-2.6 to 76.1%)    |
|                           |        | Afghanistan                  | 46.7% (36.2–56.3%) | 4% (-10.2 to 20.6%)     | 872.47 (576.96–1229.51)   | 32.6% (-2 to 71.2%)      |
|                           |        | Sudan                        | 59.8% (49.2–68.9%) | 15.3% (4.2 to 29.2%)    | 1012.82 (706.92–1466.28)  | 24.5% (-0.8 to 57.4%)    |
| Intracerebral haemorrhage |        | Global                       | 58.8% (49.4–67.1%) | 9.5% (5 to 14.7%)       | 489.23 (406–573.54)       | -30.7% (-39.1 to -23.5%) |
|                           |        | North Africa and Middle East | 56.4% (47.4–64.3%) | 12.1% (5.3 to 23.8%)    | 309.15 (247.83–378.03)    | -45.9% (-54.5 to -33.5%) |
|                           |        | Algeria                      | 54.5% (44.1–64%)   | -4.2% (-14.4 to 6.1%)   | 219.93 (157.97–290.58)    | -69.3% (-77.2 to -59.2%) |
|                           |        | Bahrain                      | 58.1% (47.8–68.2%) | 0.7% (-9.7 to 13.5%)    | 153.87 (113.91–198.99)    | -63.9% (-72.1 to -52.3%) |
|                           |        | Egypt                        | 49.7% (40.8–58.6%) | 54.8% (26.3 to 100%)    | 320.23 (216.65–473.04)    | -37.1% (-57.2 to -8.3%)  |
|                           |        | Iran                         | 52.9% (44.3–60.9%) | 8.3% (3.7 to 15%)       | 117.98 (98.25–137.97)     | -49.8% (-57.7 to -40.3%) |
|                           |        | Iraq                         | 66.9% (57.5–74.8%) | 9.1% (1.4 to 19%)       | 684.39 (519.1–889.17)     | -23.6% (-43.4 to 2.1%)   |
|                           |        | Jordan                       | 57.7% (47.6–67.7%) | 2.9% (-8.6 to 17%)      | 188.07 (140.79–233.89)    | -58.8% (-68.4 to -47.1%) |
|                           |        | Kuwait                       | 55% (45.6–64.2%)   | 3.2% (-6.2 to 13.4%)    | 135.45 (100.62–172.99)    | -1.1% (-24 to 24.2%)     |
|                           |        | Lebanon                      | 58.6% (49.4–67.4%) | 10.7% (-0.6 to 25%)     | 75.29 (51.2–107.13)       | -60.2% (-71.4 to -42.5%) |
|                           |        | Libya                        | 60.2% (50.9–68.5%) | 15.7% (1.9 to 36.2%)    | 226.8 (163.46–313.28)     | -43.6% (-59.3 to -19.9%) |
|                           |        | Morocco                      | 65.3% (55–74.5%)   | -0.4% (-8.3 to 7.7%)    | 361.8 (259.52–481.53)     | -51.3% (-65 to -32.3%)   |

**Table S15** Burden of neurological conditions attributable to risk factors in North Africa and Middle East countries

| Risk factors             | Causes           | Locations                    | DALYs (95% UI)      |                          |                        |                          |
|--------------------------|------------------|------------------------------|---------------------|--------------------------|------------------------|--------------------------|
|                          |                  |                              | PAF (%)             | PAF change (%)           | Rate per 100,000       | Rate change (%)          |
|                          |                  |                              | 2019                | From 1990 to 2019        | 2019                   | From 1990 to 2019        |
| Subarachnoid haemorrhage |                  | Palestine                    | 51·6% (41·3–61·7%)  | 1·7% (-9·8 to 13·8%)     | 251·43 (191·58–318·03) | -56% (-67·1 to -41·3%)   |
|                          |                  | Oman                         | 57·4% (46·9–66·9%)  | 34·3% (15·4 to 59·5%)    | 289·41 (225·42–373·93) | -46·2% (-61 to -22·5%)   |
|                          |                  | Qatar                        | 56·2% (46–66·6%)    | 3·2% (-7·5 to 15·7%)     | 137·13 (98·77–182·83)  | -54·9% (-68·2 to -38·7%) |
|                          |                  | Saudi Arabia                 | 58·6% (48·3–68·2%)  | 6·2% (-3·7 to 17·6%)     | 448·16 (329·14–577·75) | -37·8% (-55·9 to -7·2%)  |
|                          |                  | Syrian Arab Republic         | 55·1% (45·2–64·7%)  | 7·7% (-4·2 to 22·3%)     | 462·41 (335·25–627·51) | -44·5% (-61·2 to -20·7%) |
|                          |                  | Tunisia                      | 55·2% (45·7–64·8%)  | 7·3% (-5 to 22·2%)       | 178·17 (124·68–248·07) | -53·4% (-68·3 to -30·3%) |
|                          |                  | Türkiye                      | 57·6% (47·1–66·9%)  | 3·3% (-5·5 to 13·6%)     | 230·01 (169·74–294·58) | -34·9% (-54·7 to -15·5%) |
|                          |                  | United Arab Emirates         | 58·5% (47·8–67·9%)  | -11·2% (-19·1 to -4%)    | 263·65 (174·84–410·7)  | -68·1% (-78·7 to -53·9%) |
|                          |                  | Yemen                        | 53·1% (42·4–62·5%)  | 7·1% (-7 to 25·2%)       | 469·85 (320·69–655·95) | -50·4% (-64·5 to -29·3%) |
|                          |                  | Afghanistan                  | 54·5% (43·3–63·8%)  | 3·5% (-11·2 to 19·6%)    | 761·9 (490·56–1065·05) | -44·1% (-60·3 to -23·8%) |
|                          |                  | Sudan                        | 65·3% (55·8–73·3%)  | 10·7% (1 to 25·4%)       | 503·13 (334·51–713·61) | -56·5% (-67·4 to -40·4%) |
|                          |                  | Global                       | 56% (47·4–64·4%)    | 10·6% (4·7 to 17·6%)     | 76·43 (61·04–91·63)    | -49·3% (-57·2 to -31·7%) |
|                          |                  | North Africa and Middle East | 51·1% (42·6–59·1%)  | 30·7% (11·8 to 67·3%)    | 48·11 (37·27–61·41)    | -51·5% (-65·5 to -23·8%) |
|                          |                  | Algeria                      | 52·9% (42·5–62·5%)  | 0·1% (-12·6 to 15·3%)    | 40·69 (28·91–55·75)    | -64·6% (-75·7 to -44%)   |
|                          |                  | Bahrain                      | 53·4% (44·5–62·3%)  | 21·4% (5·1 to 42·7%)     | 33·55 (23·97–48·78)    | -49·1% (-65·7 to -25·9%) |
|                          |                  | Egypt                        | 38% (27·4–50·2%)    | 125·8% (49·8 to 339·5%)  | 43·46 (28·51–64·68)    | -47·8% (-69·6 to -3·3%)  |
|                          |                  | Iran                         | 52·3% (43·9–60·4%)  | 6% (-0·5 to 13%)         | 28·55 (22·95–35·43)    | -53% (-66·9 to -26·9%)   |
|                          |                  | Iraq                         | 64·9% (55·2–73·3%)  | 14·2% (3·5 to 28·7%)     | 46·81 (33·36–66·33)    | -58·9% (-73·6 to -33·5%) |
|                          |                  | Jordan                       | 57·4% (47·2–67%)    | 4·4% (-8 to 20·1%)       | 22·33 (16·51–28·51)    | -47·6% (-62·8 to -23·7%) |
|                          |                  | Kuwait                       | 52·7% (43·7–61·7%)  | 14·4% (1·1 to 29·4%)     | 24·76 (18·61–31·41)    | -25·5% (-42·3 to 2·4%)   |
|                          |                  | Lebanon                      | 60·2% (49·7–69·3%)  | 21·4% (6·6 to 43·1%)     | 16·08 (10·65–23·56)    | -56·7% (-74·9 to -28·3%) |
|                          |                  | Libya                        | 52·3% (42·1–63%)    | 59·3% (13·7 to 135·2%)   | 37·5 (25·67–56·09)     | -46·3% (-63·7 to -16·7%) |
|                          |                  | Morocco                      | 63·7% (53·6–73·4%)  | 5·6% (-6·3 to 20·6%)     | 63·82 (43·93–94·3)     | -56·5% (-72·2 to -24·1%) |
|                          |                  | Palestine                    | 50·5% (40·6–59·7%)  | 1% (-11·6 to 15%)        | 25·28 (18·92–32·83)    | -45·5% (-62·6 to -19·8%) |
|                          |                  | Oman                         | 49·2% (40·4–59·9%)  | 54·9% (26·3 to 101·1%)   | 44·25 (26·27–71·26)    | -41·5% (-65·4 to 12%)    |
|                          |                  | Qatar                        | 56·5% (47–66·3%)    | 6·5% (-6·4 to 21·8%)     | 47·28 (32·85–65·55)    | -51·3% (-71·7 to -20·1%) |
|                          |                  | Saudi Arabia                 | 53·5% (42·8–64·1%)  | 4·6% (-10·1 to 20·3%)    | 26·51 (18·1–36·43)     | -50·4% (-72·4 to -16·5%) |
|                          |                  | Syrian Arab Republic         | 32·8% (25·7–40·8%)  | 53·8% (13·6 to 120·6%)   | 35·82 (25·22–49·53)    | -47% (-67 to -11%)       |
|                          |                  | Tunisia                      | 55% (45·6–64·6%)    | 15·5% (-1·3 to 36·3%)    | 35·48 (24·48–50·9)     | -56·9% (-74·3 to -24·9%) |
|                          |                  | Türkiye                      | 57·1% (47·3–66·2%)  | 4·9% (-5 to 15·8%)       | 57·67 (42·93–74·02)    | -37% (-61 to 13%)        |
|                          |                  | United Arab Emirates         | 55·1% (45·3–65·3%)  | 0·3% (-11·6 to 15·4%)    | 33·67 (16·6–56·74)     | -64·2% (-78·3 to -42%)   |
|                          |                  | Yemen                        | 51·4% (40·5–61·1%)  | 11% (-6·4 to 33·5%)      | 84·4 (43·47–143·95)    | -43·6% (-62·6 to -8·1%)  |
|                          |                  | Afghanistan                  | 53·2% (42·2–63·7%)  | 4·7% (-12·5 to 25·7%)    | 124·88 (42·15–222·29)  | -41·1% (-60·5 to -6·2%)  |
| Sudan                    | 62·1% (51·3–71%) | 16·9% (-0·5 to 45%)          | 76·18 (42·96–130·2) | -57·9% (-72·9 to -20·8%) |                        |                          |
| Kidney dysfunction       | Stroke           | Global                       | 8·2% (6·8–9·6%)     | 16·6% (12 to 20%)        | 145·06 (117·59–171·05) | -24·5% (-31·7 to -17·9%) |
|                          |                  | North Africa and Middle East | 11% (8·7–13·3%)     | 51·9% (38·8 to 65·2%)    | 200·82 (155·56–247·94) | 3·2% (-12·2 to 21·1%)    |
|                          |                  | Algeria                      | 10·7% (7·6–13·5%)   | 43% (24·4 to 57·8%)      | 188·19 (124·69–256·26) | -20·7% (-38·1 to 1·3%)   |
|                          |                  | Bahrain                      | 11·9% (8·6–14·7%)   | 35·5% (21·6 to 46·7%)    | 111·63 (78·36–152·79)  | -35·6% (-49·2 to -20·8%) |
|                          |                  | Egypt                        | 11·1% (8·9–13·4%)   | 108·5% (67·1 to 145·4%)  | 237·49 (167·07–335·23) | 34·9% (0·4 to 75·2%)     |
|                          |                  | Iran                         | 11·1% (8·3–13·6%)   | 18·5% (11 to 24·8%)      | 139·5 (105·24–173·85)  | -35·6% (-44·1 to -25%)   |
|                          |                  | Iraq                         | 12·6% (10–14·9%)    | 40% (29·9 to 49·5%)      | 367·22 (272·9–460·37)  | 12·7% (-11·3 to 40·4%)   |
|                          |                  | Jordan                       | 12·9% (9·8–15·8%)   | 33·1% (22·1 to 42·5%)    | 187·57 (135·73–240·01) | -33·7% (-47·2 to -20·5%) |
|                          |                  | Kuwait                       | 11·1% (8·4–13·6%)   | 24·9% (15·7 to 34·7%)    | 104·36 (74·35–135·01)  | 10·3% (-7·1 to 31·3%)    |
|                          |                  | Lebanon                      | 12% (8·8–14·8%)     | 48·5% (34·3 to 61·8%)    | 90·21 (60·13–122·12)   | -1·5% (-25 to 25·7%)     |
|                          |                  | Libya                        | 11·4% (9–13·6%)     | 58% (41·6 to 76·5%)      | 179·34 (124·98–238·19) | 24·2% (-4·8 to 62·4%)    |
|                          |                  | Morocco                      | 11·6% (9–14%)       | 65·8% (47·6 to 82·6%)    | 260·78 (184·99–334·16) | 37·1% (3·5 to 72·3%)     |
|                          |                  | Palestine                    | 12·7% (9·5–15·5%)   | 34·9% (22·5 to 44·6%)    | 269·78 (196–347·03)    | -9% (-29·2 to 14·8%)     |
|                          |                  | Oman                         | 11·9% (8·9–14·4%)   | 56·5% (37·2 to 74·4%)    | 223·97 (163·82–287·15) | -4% (-27·2 to 30·1%)     |
|                          |                  | Qatar                        | 11·1% (7·8–14·1%)   | 30·9% (14·4 to 43·6%)    | 100·24 (65·75–137·53)  | -27·5% (-46·5 to -4·4%)  |
|                          |                  | Saudi Arabia                 | 13·5% (10·7–16·1%)  | 47·8% (37·6 to 58·6%)    | 285·82 (207·98–363·39) | 4·8% (-21·4 to 39·7%)    |



**Table S15** Burden of neurological conditions attributable to risk factors in North Africa and Middle East countries

| Risk factors              | Causes               | Locations                    | DALYs (95% UI)        |                        |                         |                          |
|---------------------------|----------------------|------------------------------|-----------------------|------------------------|-------------------------|--------------------------|
|                           |                      |                              | PAF (%)               | PAF change (%)         | Rate per 100,000        | Rate change (%)          |
|                           |                      |                              | 2019                  | From 1990 to 2019      | 2019                    | From 1990 to 2019        |
| Ischaemic stroke          |                      | Syrian Arab Republic         | 10.5% (8.2–12.5%)     | 45% (31.4 to 58.4%)    | 212.3 (151.84–282.21)   | -13.3% (-37.4 to 19.3%)  |
|                           |                      | Tunisia                      | 11.5% (8.6–14.2%)     | 52% (35.8 to 67.4%)    | 169.5 (117.61–232.46)   | 14.4% (-17.3 to 53.7%)   |
|                           |                      | Türkiye                      | 10.5% (8–12.8%)       | 55% (37.8 to 71.6%)    | 121.57 (86.72–160.08)   | 18.5% (-14.6 to 52%)     |
|                           |                      | United Arab Emirates         | 13% (10.2–15.8%)      | 33.1% (23.2 to 43.4%)  | 251.38 (174.65–342.61)  | -28.1% (-45.5 to -6.6%)  |
|                           |                      | Yemen                        | 9.4% (7.5–11.4%)      | 40.8% (26.4 to 57%)    | 260.75 (184.85–351.87)  | 6.2% (-18.3 to 40.9%)    |
|                           |                      | Afghanistan                  | 9.9% (8.1–11.6%)      | 37.6% (25.2 to 50.7%)  | 345.8 (241.46–470.41)   | 7.6% (-17.3 to 35.5%)    |
|                           |                      | Sudan                        | 10.1% (8–12.2%)       | 51.9% (34.3 to 71.1%)  | 260.13 (182.49–369.4)   | 1.6% (-18.7 to 26.9%)    |
|                           |                      | Global                       | 9% (6.7–11.3%)        | 13.6% (11.5 to 16.8%)  | 72.17 (52.71–93.11)     | -18.8% (-26.1 to -11.9%) |
|                           |                      | North Africa and Middle East | 12.5% (9.2–15.7%)     | 38.8% (28.4 to 47.9%)  | 148.49 (107.88–190)     | 26.7% (6 to 45.3%)       |
|                           |                      | Algeria                      | 11.5% (7.4–15.2%)     | 37.3% (21.8 to 50.1%)  | 147.26 (89.51–207.24)   | 3.5% (-19.5 to 30.1%)    |
|                           |                      | Bahrain                      | 13% (8.5–17%)         | 30.7% (16.4 to 41.7%)  | 80.06 (50.76–112.57)    | -26.5% (-42.4 to -10.1%) |
|                           |                      | Egypt                        | 13.3% (10.2–16.4%)    | 64.6% (48.6 to 85.3%)  | 184.51 (127.18–262.21)  | 87.6% (37.8 to 138.1%)   |
|                           |                      | Iran                         | 12% (8.6–15.2%)       | 16.1% (9.2 to 21.5%)   | 118.34 (84.35–151.74)   | -33.5% (-41.9 to -22.5%) |
|                           |                      | Iraq                         | 14.1% (10.5–17.6%)    | 34.5% (24.1 to 43.9%)  | 258.3 (184.52–337.15)   | 25.2% (-2.4 to 54.5%)    |
|                           |                      | Jordan                       | 13.7% (9.7–17.3%)     | 31.7% (20.1 to 41.4%)  | 148.9 (99.88–195.47)    | -29.2% (-44.3 to -14.9%) |
|                           |                      | Kuwait                       | 12.4% (8.7–15.7%)     | 22.8% (13.3 to 33.1%)  | 80.01 (54.67–106.58)    | 8.1% (-9.4 to 29%)       |
|                           |                      | Lebanon                      | 12.9% (8.9–16.3%)     | 43.1% (30 to 56.2%)    | 76.87 (48.13–104.82)    | 21.5% (-9.3 to 51.3%)    |
|                           |                      | Libya                        | 12.9% (9.7–16%)       | 40.9% (30.9 to 52.5%)  | 144.97 (98.54–195.88)   | 56.6% (20.5 to 103.6%)   |
|                           |                      | Morocco                      | 12.7% (9.4–15.8%)     | 54.8% (39.3 to 69%)    | 203.89 (138.16–267.25)  | 83.5% (39.7 to 128.5%)   |
|                           |                      | Palestine                    | 13.4% (9.2–17%)       | 31% (20.5 to 40.1%)    | 213.23 (143.3–282.63)   | 7.6% (-15.6 to 36.2%)    |
|                           |                      | Oman                         | 13% (9.1–16.5%)       | 47.7% (29.8 to 62.6%)  | 167.69 (113.94–224.14)  | 20.7% (-9.7 to 61.9%)    |
|                           |                      | Qatar                        | 12.4% (7.6–16.7%)     | 22.7% (4 to 34.3%)     | 71.73 (41.05–102.59)    | -20.7% (-41.7 to 3.5%)   |
|                           |                      | Saudi Arabia                 | 15% (10.8–18.7%)      | 47.7% (36.4 to 60.3%)  | 194.76 (132.07–257.63)  | 22.1% (-8.9 to 58.3%)    |
|                           |                      | Syrian Arab Republic         | 12.1% (8.6–15.3%)     | 34% (20.6 to 45.9%)    | 129.83 (85.2–179.55)    | 0.4% (-27.8 to 36.6%)    |
|                           |                      | Tunisia                      | 12.5% (8.6–15.9%)     | 43.2% (30.9 to 55.4%)  | 136.1 (89.41–190.04)    | 49% (10.5 to 96.5%)      |
|                           |                      | Türkiye                      | 11.9% (8–15.6%)       | 46.8% (28.7 to 63.8%)  | 79.18 (51.63–110.43)    | 35.2% (-3.4 to 72.9%)    |
|                           | United Arab Emirates | 14.3% (10.6–17.8%)           | 30.1% (21.5 to 39.5%) | 202.2 (136.83–278.44)  | -13.9% (-34.1 to 10.8%) |                          |
|                           | Yemen                | 10.7% (8.1–13.4%)            | 35% (24.1 to 47.7%)   | 184.54 (124.81–258.6)  | 61.7% (26.3 to 109.8%)  |                          |
|                           | Afghanistan          | 11.6% (8.9–14.3%)            | 32.8% (23 to 41.8%)   | 216.38 (143.6–305.49)  | 69% (30.9 to 113.7%)    |                          |
|                           | Sudan                | 11.4% (8.4–14.2%)            | 42.2% (29.2 to 55.3%) | 192.07 (125.5–285.43)  | 53.5% (22.9 to 91.5%)   |                          |
| Intracerebral haemorrhage |                      | Global                       | 8.8% (7.3–10.4%)      | 11.4% (8.6 to 14.7%)   | 72.89 (59.13–88.21)     | -29.4% (-37.3 to -22.6%) |
|                           |                      | North Africa and Middle East | 9.5% (7.8–11.5%)      | 40.2% (28.7 to 58.8%)  | 52.33 (41.03–64.92)     | -32.4% (-42.9 to -15.8%) |
|                           |                      | Algeria                      | 10.2% (8–12.3%)       | 34.2% (21.5 to 48.6%)  | 40.93 (29.18–54.23)     | -57% (-67.6 to -42%)     |
|                           |                      | Bahrain                      | 11.9% (9.3–14.5%)     | 37.1% (23 to 50.5%)    | 31.57 (22.6–42.16)      | -50.9% (-62.8 to -35.3%) |
|                           |                      | Egypt                        | 8.2% (6.4–10.3%)      | 67.6% (37.3 to 120.1%) | 52.98 (33.59–82.97)     | -31.9% (-53.4 to -1.3%)  |
|                           |                      | Iran                         | 9.5% (7.7–11.4%)      | 17.7% (10.3 to 27.4%)  | 21.16 (17.07–25.7)      | -45.5% (-54 to -34.3%)   |
|                           |                      | Iraq                         | 10.7% (8.6–12.9%)     | 30.5% (20.2 to 42.1%)  | 108.91 (79.5–143.79)    | -8.7% (-32.3 to 20.6%)   |
|                           |                      | Jordan                       | 11.9% (9.4–14.5%)     | 33% (21.5 to 45.4%)    | 38.68 (28.5–50.68)      | -46.8% (-57.9 to -32.5%) |
|                           |                      | Kuwait                       | 9.9% (8–11.9%)        | 23.8% (14.3 to 34.9%)  | 24.35 (17.9–32.31)      | 18.5% (-6.9 to 49.2%)    |
|                           |                      | Lebanon                      | 10.4% (8.3–12.5%)     | 30.9% (19.9 to 42.8%)  | 13.34 (8.6–19.09)       | -52.9% (-66 to -33.9%)   |
|                           |                      | Libya                        | 9.1% (7.4–11%)        | 36.2% (21 to 58.7%)    | 34.37 (24.37–48.12)     | -33.7% (-51.5 to -8.5%)  |
|                           |                      | Morocco                      | 10.3% (8.3–12.5%)     | 47.2% (33.4 to 63%)    | 56.89 (40.62–76.21)     | -28% (-48.1 to -0.2%)    |
|                           |                      | Palestine                    | 11.6% (9.1–14.1%)     | 32.8% (22.1 to 43.3%)  | 56.55 (41.79–73.38)     | -42.5% (-56.7 to -23.2%) |
|                           |                      | Oman                         | 11.2% (8.7–13.7%)     | 48.4% (30.9 to 67.6%)  | 56.28 (40.92–74.23)     | -40.5% (-56.4 to -15.6%) |
|                           |                      | Qatar                        | 11.7% (8.6–14.7%)     | 36.6% (15.9 to 56.9%)  | 28.51 (19.3–40.18)      | -40.3% (-57.9 to -16.1%) |
|                           |                      | Saudi Arabia                 | 11.9% (9.6–14.5%)     | 37.2% (27.1 to 48.5%)  | 91.06 (64.87–118.65)    | -19.5% (-42.4 to 17.2%)  |
|                           |                      | Syrian Arab Republic         | 9.8% (7.9–12%)        | 38.5% (25.1 to 54%)    | 82.47 (55.53–112.21)    | -28.7% (-50.5 to 1%)     |
|                           |                      | Tunisia                      | 10.4% (8.3–12.5%)     | 35.2% (24.4 to 47.4%)  | 33.39 (23.19–46.69)     | -41.2% (-59.2 to -12.6%) |
|                           |                      | Türkiye                      | 10.6% (8.4–12.9%)     | 52.8% (34.4 to 73.5%)  | 42.39 (30.72–56.46)     | -3.6% (-31.2 to 27.6%)   |
|                           |                      | United Arab Emirates         | 10.9% (8.8–13.4%)     | 19.4% (9.3 to 29.1%)   | 49.18 (32.14–74.66)     | -57.2% (-70.1 to -38.9%) |
|                           |                      | Yemen                        | 8.6% (7–10.4%)        | 25.4% (15.2 to 36.8%)  | 76.22 (53.3–104.4)      | -42% (-57.6 to -19.2%)   |

**Table S15** Burden of neurological conditions attributable to risk factors in North Africa and Middle East countries

| Risk factors            | Causes            | Locations                    | DALYs (95% UI)        |                          |                       |                          |
|-------------------------|-------------------|------------------------------|-----------------------|--------------------------|-----------------------|--------------------------|
|                         |                   |                              | PAF (%)               | PAF change (%)           | Rate per 100,000      | Rate change (%)          |
|                         |                   |                              | 2019                  | From 1990 to 2019        | 2019                  | From 1990 to 2019        |
| Low physical activity   | Stroke            | Afghanistan                  | 9.3% (7.6–11.2%)      | 24.1% (16.8 to 31.9%)    | 129.42 (85.17–182.27) | -33.1% (-50.3 to -12.4%) |
|                         |                   | Sudan                        | 8.9% (7.2–10.7%)      | 32.3% (20.2 to 52.4%)    | 68.05 (45.31–96.97)   | -48.1% (-60.5 to -29.5%) |
|                         |                   | Global                       | 1.8% (0.3–4.7%)       | 10.5% (2.8 to 22.1%)     | 31.16 (5.69–82.02)    | -28.4% (-34.3 to -19.7%) |
|                         |                   | North Africa and Middle East | 5% (1.1–11.2%)        | 48.9% (35.5 to 63%)      | 91.71 (18.75–203.41)  | 1.2% (-11.8 to 16%)      |
|                         |                   | Algeria                      | 6.3% (1.4–13.5%)      | 43.9% (29.3 to 68.6%)    | 110.29 (23.46–231.6)  | -20.2% (-35.4 to 0.4%)   |
|                         |                   | Bahrain                      | 6% (1.3–12.3%)        | 30.1% (18.9 to 51.3%)    | 56.44 (12.52–117.47)  | -38.3% (-49.3 to -22.7%) |
|                         |                   | Egypt                        | 4.7% (1–10.8%)        | 110.6% (58 to 150.8%)    | 100.02 (17.45–238.36) | 35.8% (-1.8 to 74.6%)    |
|                         |                   | Iran                         | 5% (1–12.4%)          | 11.7% (4.9 to 23%)       | 63.38 (12.02–154.69)  | -39.3% (-47.1 to -27.3%) |
|                         |                   | Iraq                         | 5.3% (1.2–11.5%)      | 24.8% (12.4 to 44.4%)    | 155.48 (34.19–351.11) | 0.4% (-19.5 to 25.3%)    |
|                         |                   | Jordan                       | 5.2% (1.1–11.9%)      | 26.8% (12.1 to 56.8%)    | 75.02 (15.32–171.38)  | -36.9% (-51.2 to -17.5%) |
|                         |                   | Kuwait                       | 6.8% (1.5–13.9%)      | 3.9% (-6.5 to 17.2%)     | 64.03 (14.5–129.68)   | -8.2% (-22.2 to 9.2%)    |
|                         |                   | Lebanon                      | 6.6% (1.4–14.4%)      | 38.3% (22.1 to 59.1%)    | 49.61 (10.08–109.74)  | -8.1% (-32.5 to 15.5%)   |
|                         |                   | Libya                        | 5.7% (1.2–12.7%)      | 52.2% (30.8 to 71.8%)    | 89.11 (17.69–202.67)  | 19.4% (-7.3 to 53.5%)    |
|                         |                   | Morocco                      | 5.6% (1.2–12.4%)      | 56.7% (38.3 to 83.8%)    | 126.47 (25.16–277.94) | 29.5% (2 to 60.6%)       |
|                         |                   | Palestine                    | 5.8% (1.3–12.7%)      | 29.8% (17.3 to 52.2%)    | 122.92 (26.53–276.52) | -12.3% (-30.1 to 12.7%)  |
|                         |                   | Oman                         | 6% (1.3–12.6%)        | 71.1% (42.5 to 127.2%)   | 113.26 (24.78–235.79) | 4.9% (-21.8 to 54.9%)    |
|                         |                   | Qatar                        | 6.4% (1.5–13%)        | 31.8% (16.6 to 54.9%)    | 57.81 (13.46–118.27)  | -27.1% (-44.5 to -1.1%)  |
|                         |                   | Saudi Arabia                 | 7.5% (1.9–14.3%)      | 44.1% (22.8 to 92.4%)    | 159.92 (40.88–298.44) | 2.3% (-24.2 to 50.2%)    |
|                         |                   | Syrian Arab Republic         | 4.3% (0.9–9.4%)       | 39.3% (20.7 to 62.4%)    | 86.09 (17.45–195.79)  | -17.1% (-39 to 11.1%)    |
|                         |                   | Tunisia                      | 2.8% (0.4–7.6%)       | 57.7% (36.3 to 94%)      | 40.64 (6.08–115.44)   | 19.1% (-13 to 59.9%)     |
|                         |                   | Türkiye                      | 4% (0.8–9.1%)         | 38% (18.5 to 70.9%)      | 46.37 (9.07–110.26)   | 6.1% (-24 to 42.7%)      |
|                         |                   | United Arab Emirates         | 8% (1.9–16%)          | 29.7% (15.4 to 43.9%)    | 153.25 (34.19–310.26) | -29.9% (-46.5 to -9.7%)  |
|                         |                   | Yemen                        | 4.3% (0.9–10%)        | 61% (32.8 to 87.1%)      | 117.38 (23.34–274.93) | 21.4% (-4.2 to 54.6%)    |
|                         |                   | Afghanistan                  | 3.7% (0.8–8.9%)       | 68.2% (42.2 to 99.1%)    | 129.89 (25.13–306.86) | 31.8% (2.6 to 64.1%)     |
|                         |                   | Sudan                        | 7.9% (2–14.6%)        | 74% (51.9 to 96.4%)      | 203.86 (52.24–391.56) | 16.4% (-5.1 to 43.8%)    |
|                         |                   | Global                       | 3.9% (0.7–10.4%)      | 0% (-5.9 to 9.8%)        | 31.16 (5.69–82.02)    | -28.4% (-34.3 to -19.7%) |
|                         |                   | North Africa and Middle East | 7.7% (1.7–17.2%)      | 10.7% (4.5 to 20.3%)     | 91.71 (18.75–203.41)  | 1.2% (-11.8 to 16%)      |
| Algeria                 | 8.7% (1.9–18.4%)  | 5.9% (-3.4 to 22.3%)         | 110.29 (23.46–231.6)  | -20.2% (-35.4 to 0.4%)   |                       |                          |
| Bahrain                 | 9.2% (2.1–18.8%)  | 10% (2.4 to 25.6%)           | 56.44 (12.52–117.47)  | -38.3% (-49.3 to -22.7%) |                       |                          |
| Egypt                   | 7.2% (1.5–16.7%)  | 18.6% (2.7 to 36.8%)         | 100.02 (17.45–238.36) | 35.8% (-1.8 to 74.6%)    |                       |                          |
| Iran                    | 6.4% (1.2–15.7%)  | 5.8% (0.6 to 16.7%)          | 63.38 (12.02–154.69)  | -39.3% (-47.1 to -27.3%) |                       |                          |
| Iraq                    | 8.5% (1.9–18.3%)  | 8% (-0.2 to 23.4%)           | 155.48 (34.19–351.11) | 0.4% (-19.5 to 25.3%)    |                       |                          |
| Jordan                  | 6.9% (1.5–15.9%)  | 17.6% (4.4 to 44.6%)         | 75.02 (15.32–171.38)  | -36.9% (-51.2 to -17.5%) |                       |                          |
| Kuwait                  | 9.9% (2.2–20.1%)  | 4.4% (-4.4 to 16.3%)         | 64.03 (14.5–129.68)   | -8.2% (-22.2 to 9.2%)    |                       |                          |
| Lebanon                 | 8.3% (1.7–18%)    | 7.8% (-2.9 to 22.6%)         | 49.61 (10.08–109.74)  | -8.1% (-32.5 to 15.5%)   |                       |                          |
| Libya                   | 8% (1.7–17.6%)    | 7.5% (-3.2 to 19%)           | 89.11 (17.69–202.67)  | 19.4% (-7.3 to 53.5%)    |                       |                          |
| Morocco                 | 7.9% (1.7–17.4%)  | 9.2% (-0.1 to 25.9%)         | 126.47 (25.16–277.94) | 29.5% (2 to 60.6%)       |                       |                          |
| Palestine               | 7.7% (1.7–16.9%)  | 6.6% (-2 to 23.6%)           | 122.92 (26.53–276.52) | -12.3% (-30.1 to 12.7%)  |                       |                          |
| Oman                    | 8.8% (1.9–18.2%)  | 28.6% (7.9 to 69.1%)         | 113.26 (24.78–235.79) | 4.9% (-21.8 to 54.9%)    |                       |                          |
| Qatar                   | 10% (2.4–20.2%)   | 12.9% (2.3 to 32.3%)         | 57.81 (13.46–118.27)  | -27.1% (-44.5 to -1.1%)  |                       |                          |
| Saudi Arabia            | 12.3% (3.1–23%)   | 23.7% (8.5 to 63.2%)         | 159.92 (40.88–298.44) | 2.3% (-24.2 to 50.2%)    |                       |                          |
| Syrian Arab Republic    | 8.1% (1.8–17.7%)  | 10.9% (1.6 to 27.9%)         | 86.09 (17.45–195.79)  | -17.1% (-39 to 11.1%)    |                       |                          |
| Tunisia                 | 3.7% (0.6–10.3%)  | 14.1% (2.6 to 38.7%)         | 40.64 (6.08–115.44)   | 19.1% (-13 to 59.9%)     |                       |                          |
| Türkiye                 | 7% (1.4–16%)      | 14.8% (1.8 to 38.7%)         | 46.37 (9.07–110.26)   | 6.1% (-24 to 42.7%)      |                       |                          |
| United Arab Emirates    | 10.8% (2.5–21.5%) | 5.8% (-1.9 to 12.9%)         | 153.25 (34.19–310.26) | -29.9% (-46.5 to -9.7%)  |                       |                          |
| Yemen                   | 6.9% (1.4–16.2%)  | 1.3% (-11.5 to 12.7%)        | 117.38 (23.34–274.93) | 21.4% (-4.2 to 54.6%)    |                       |                          |
| Afghanistan             | 7% (1.5–16.6%)    | 2.9% (-7.3 to 15.3%)         | 129.89 (25.13–306.86) | 31.8% (2.6 to 64.1%)     |                       |                          |
| Sudan                   | 12.1% (3.1–22.5%) | 7.6% (1.2 to 18.3%)          | 203.86 (52.24–391.56) | 16.4% (-5.1 to 43.8%)    |                       |                          |
| Global                  | 6.6% (5–8.5%)     | -14.7% (-21.7 to -3.7%)      | 116.95 (89.66–149.32) | -44.7% (-51.4 to -36.3%) |                       |                          |
| Non-optimal temperature | Stroke            |                              |                       |                          |                       |                          |

**Table S15** Burden of neurological conditions attributable to risk factors in North Africa and Middle East countries

| Risk factors | Causes                    | Locations                    | DALYs (95% UI)    |                         |                        |                          |
|--------------|---------------------------|------------------------------|-------------------|-------------------------|------------------------|--------------------------|
|              |                           |                              | PAF (%)           | PAF change (%)          | Rate per 100,000       | Rate change (%)          |
|              |                           |                              | 2019              | From 1990 to 2019       | 2019                   | From 1990 to 2019        |
|              |                           | North Africa and Middle East | 7.1% (5.9–9.1%)   | 0.1% (-12.5 to 18.5%)   | 129.1 (90–168.54)      | -31.9% (-44.4 to -17.3%) |
|              |                           | Algeria                      | 6.7% (3.4–9.8%)   | -1.8% (-14.8 to 27.6%)  | 117.84 (58.87–183.58)  | -45.5% (-59.1 to -24.1%) |
|              |                           | Bahrain                      | 5.8% (2.9–9.3%)   | -1% (-35.9 to 34.4%)    | 54.83 (18.04–95.42)    | -52.8% (-69.2 to -33%)   |
|              |                           | Egypt                        | 5.3% (2.4–8.9%)   | 4.9% (-24.8 to 58%)     | 113.92 (48.24–206.83)  | -32% (-56.3 to 7.9%)     |
|              |                           | Iran                         | 8.2% (6.4–10%)    | -2.9% (-10.3 to 7.5%)   | 102.97 (79.85–127.24)  | -47.3% (-54.7 to -37.3%) |
|              |                           | Iraq                         | 7.1% (4–10%)      | 10.2% (-7.8 to 30.5%)   | 206.58 (118.42–311.74) | -11.1% (-34 to 19.2%)    |
|              |                           | Jordan                       | 5.5% (2.1–9.3%)   | -4.1% (-13.3 to 24.2%)  | 78.95 (29.87–138.69)   | -52.2% (-63.7 to -32.3%) |
|              |                           | Kuwait                       | 7.2% (1.2–12.6%)  | 7.2% (-30.6 to 31.2%)   | 67.46 (11.04–121.22)   | -5.3% (-40.9 to 21.7%)   |
|              |                           | Lebanon                      | 6.5% (4.5–8.7%)   | -18.3% (-28.2 to -11%)  | 49.43 (27.2–72.15)     | -45.6% (-61.8 to -26.3%) |
|              |                           | Libya                        | 5% (1.8–8.7%)     | 3.2% (-30.5 to 24.8%)   | 78.51 (27.33–143.25)   | -18.7% (-49.3 to 19.7%)  |
|              |                           | Morocco                      | 6.9% (4.8–9.3%)   | -2.8% (-9 to 2.1%)      | 155.42 (101.26–229.28) | -19.5% (-38.3 to 0.8%)   |
|              |                           | Palestine                    | 5.2% (1.1–9.7%)   | -6.9% (-33.7 to 38.1%)  | 109.61 (23.85–208.66)  | -37.3% (-56.2 to -4.2%)  |
|              |                           | Oman                         | 7.8% (-0.2–14.7%) | -2.6% (-89.9 to 106.8%) | 146.2 (-3.56–292.93)   | -40.4% (-93.4 to 31.2%)  |
|              |                           | Qatar                        | 7.8% (0.5–14.3%)  | -3.7% (-99.3 to 77.5%)  | 70.63 (4.52–138.33)    | -46.6% (-99.5 to -0.4%)  |
|              |                           | Saudi Arabia                 | 6.5% (2.9–9.9%)   | 1.9% (-25.4 to 53.5%)   | 137.79 (57.64–221.22)  | -27.6% (-55.9 to 22.4%)  |
|              |                           | Syrian Arab Republic         | 6.7% (3.9–10%)    | -1.6% (-9.7 to 12.7%)   | 136.36 (73.07–214.99)  | -41.1% (-58.5 to -16%)   |
|              |                           | Tunisia                      | 6% (2.8–9.5%)     | 0% (-24.6 to 12%)       | 88.13 (38.96–152.66)   | -24.7% (-50.7 to 7.1%)   |
|              |                           | Türkiye                      | 9.2% (6.6–11.7%)  | -9.4% (-14.6 to -4.1%)  | 106.88 (73.31–145.65)  | -30.7% (-51 to -11%)     |
|              |                           | United Arab Emirates         | 9% (-0.8–17.6%)   | -1.5% (-171.2 to 124%)  | 173 (-14.41–365.4)     | -46.5% (-139.8 to 19.3%) |
|              |                           | Yemen                        | 5.4% (2.1–8.4%)   | -5.5% (-53.3 to 63.5%)  | 148.15 (55.48–251.92)  | -28.7% (-65.5 to 23.8%)  |
|              |                           | Afghanistan                  | 9.4% (6.9–12.6%)  | -1.3% (-8.4 to 6.9%)    | 328.63 (204.92–469.05) | -22.8% (-41.4 to -1.6%)  |
|              |                           | Sudan                        | 6.1% (2.1–9.9%)   | 6% (-48.5 to 72.4%)     | 157.76 (54.92–295.75)  | -28.8% (-66.2 to 9.2%)   |
|              | Ischaemic stroke          | Global                       | 6.6% (5.1–8.5%)   | -20% (-26.3 to -10.7%)  | 52.73 (40.28–68.57)    | -42.8% (-49.6 to -34.4%) |
|              |                           | North Africa and Middle East | 6.8% (4.8–8.8%)   | -0.4% (-12.5 to 15.6%)  | 80.34 (56.24–104.65)   | -9.2% (-28 to 9.5%)      |
|              |                           | Algeria                      | 6.5% (3.3–9.6%)   | -0.1% (-13.6 to 30.1%)  | 83.44 (41.47–130.21)   | -24.7% (-44.2 to 4%)     |
|              |                           | Bahrain                      | 5.5% (1.9–8.9%)   | -0.2% (-34.9 to 35.2%)  | 33.86 (10.97–59.41)    | -43.8% (-63.7 to -21.6%) |
|              |                           | Egypt                        | 5.1% (2.2–8.6%)   | 9.4% (-20.2 to 64.5%)   | 70.12 (29.19–125.55)   | 24.8% (-27.1 to 100%)    |
|              |                           | Iran                         | 8% (6.3–9.8%)     | -2.8% (-10.5 to 8.5%)   | 78.79 (60.74–97.69)    | -44.4% (-53.3 to -33.5%) |
|              |                           | Iraq                         | 6.8% (3.9–9.7%)   | 11.7% (-7 to 32.7%)     | 124.68 (71.93–187.48)  | 3.8% (-22.8 to 39%)      |
|              |                           | Jordan                       | 5.3% (2.9–9.1%)   | -4.1% (-13.2 to 24%)    | 57.04 (21.45–99.4)     | -48.4% (-61.8 to -28%)   |
|              |                           | Kuwait                       | 6.9% (1.1–12%)    | 7% (-31.1 to 31.2%)     | 44.35 (7.06–80.14)     | -5.8% (-42.8 to 20.7%)   |
|              |                           | Lebanon                      | 6.3% (4.2–8.5%)   | -14.7% (-25.8 to -6.8%) | 38.15 (21.45–55.67)    | -27.2% (-48.9 to -2.6%)  |
|              |                           | Libya                        | 4.8% (1.8–8.4%)   | 7% (-27.7 to 29.9%)     | 54.23 (18.73–99.8)     | 19.2% (-27.3 to 71.5%)   |
|              |                           | Morocco                      | 6.7% (4.6–9%)     | 0.7% (-6.5 to 6.5%)     | 107.68 (70.15–158.67)  | 19.3% (-10.7 to 47.5%)   |
|              |                           | Palestine                    | 5.1% (1.1–9.5%)   | -5.7% (-32.6 to 39.5%)  | 80.47 (17.32–153.82)   | -22.6% (-46.6 to 18.2%)  |
|              |                           | Oman                         | 7.5% (-0.2–14.2%) | -0.8% (-89.6 to 111.2%) | 97.17 (-2.32–194.21)   | -19.2% (-91.4 to 74.2%)  |
|              |                           | Qatar                        | 7.3% (0.5–13.6%)  | -2.2% (-99.3 to 80%)    | 42.4 (2.69–83.89)      | -36.8% (-99.4 to 15.6%)  |
|              |                           | Saudi Arabia                 | 6.3% (2.8–9.6%)   | 2% (-25.5 to 52.3%)     | 81.83 (33.77–130.03)   | -15.6% (-50.2 to 40.2%)  |
|              |                           | Syrian Arab Republic         | 6.3% (3.7–9.4%)   | -1.3% (-10.8 to 13.8%)  | 67.82 (36.91–106.82)   | -26% (-49.6 to 6.2%)     |
|              |                           | Tunisia                      | 5.8% (2.7–9.3%)   | 2.7% (-22.6 to 15.2%)   | 63.41 (27.79–110.06)   | 6.9% (-32.8 to 52.8%)    |
|              |                           | Türkiye                      | 8.6% (6.2–10.9%)  | -7.1% (-15 to 0.2%)     | 56.87 (39.18–78.07)    | -14.6% (-42.9 to 12.4%)  |
|              |                           | United Arab Emirates         | 8.6% (-0.7–17%)   | -0.7% (-172.5 to 124%)  | 122.56 (-10.23–255.24) | -34% (-150.7 to 51.6%)   |
|              |                           | Yemen                        | 5.2% (2–8.1%)     | -2.5% (-51.5 to 67.8%)  | 89.09 (33.15–148.36)   | 16.5% (-38.6 to 96.4%)   |
|              |                           | Afghanistan                  | 9.1% (6.7–12.1%)  | 1.6% (-5.8 to 10.1%)    | 169.45 (107.06–243.25) | 29.3% (-1.8 to 65.8%)    |
|              |                           | Sudan                        | 5.9% (2.9–6%)     | 8.9% (-47.2 to 77.3%)   | 100.06 (31.58–189.81)  | 17.9% (-42.6 to 85.7%)   |
|              | Intracerebral haemorrhage | Global                       | 6.7% (5.8–5%)     | -8.5% (-17.3 to 8.2%)   | 55.47 (41.16–71.19)    | -42.1% (-50.4 to -30.6%) |
|              |                           | North Africa and Middle East | 7.6% (5.3–9.8%)   | 4% (-10.4 to 26.2%)     | 41.71 (28.68–55.64)    | -49.8% (-59 to -36.9%)   |
|              |                           | Algeria                      | 7.2% (3.7–10.5%)  | 0.5% (-12.8 to 30.6%)   | 29.15 (14.37–44.99)    | -67.7% (-77.2 to -54.3%) |
|              |                           | Bahrain                      | 6.4% (2.2–10.3%)  | 1.8% (-35 to 38.6%)     | 17.04 (5.63–29.48)     | -63.4% (-76.1 to -45.5%) |
|              |                           | Egypt                        | 5.8% (2.7–9.8%)   | 9.4% (-21.2 to 62.9%)   | 37.29 (15.74–68.68)    | -55.8% (-72.3 to -28.8%) |

**Table S15** Burden of neurological conditions attributable to risk factors in North Africa and Middle East countries

| Risk factors              | Causes            | Locations                    | DALYs (95% UI)       |                           |                       |                           |
|---------------------------|-------------------|------------------------------|----------------------|---------------------------|-----------------------|---------------------------|
|                           |                   |                              | PAF (%)              | PAF change (%)            | Rate per 100,000      | Rate change (%)           |
|                           |                   |                              | 2019                 | From 1990 to 2019         | 2019                  | From 1990 to 2019         |
| Subarachnoid haemorrhage  |                   | Iran                         | 8.8% (6.9–10.7%)     | -1.4% (-8.4 to 8.2%)      | 19.63 (15.32–24.06)   | -54.3% (-61.7 to -45.8%)  |
|                           |                   | Iraq                         | 7.5% (4.3–10.6%)     | 10.8% (-6.7 to 32.2%)     | 76.89 (43.7–118.32)   | -22.4% (-44.1 to 5.8%)    |
|                           |                   | Jordan                       | 6.1% (2.4–10.6%)     | -0.4% (-8.4 to 28.7%)     | 20 (7.56–35.68)       | -60.2% (-69.6 to -43.2%)  |
|                           |                   | Kuwait                       | 8% (1.4–14%)         | 9% (-28.2 to 31.8%)       | 19.81 (3.11–36.07)    | 4.3% (-37.1 to 37.9%)     |
|                           |                   | Lebanon                      | 7.5% (5.3–9.9%)      | -16.5% (-23.5 to -10.3%)  | 9.7 (5.71–15.27)      | -69.8% (-79 to -56.3%)    |
|                           |                   | Libya                        | 5.5% (2–9.4%)        | 5.8% (-28.8 to 26.7%)     | 20.57 (6.97–38.01)    | -48.4% (-68.2 to -21.3%)  |
|                           |                   | Morocco                      | 7.3% (5.1–9.9%)      | -2.1% (-8.1 to 2.2%)      | 40.67 (25.95–59.37)   | -52.1% (-65.6 to -34.4%)  |
|                           |                   | Palestine                    | 5.5% (1.2–10.5%)     | -5.7% (-33.5 to 39.7%)    | 26.78 (5.76–51.28)    | -59.3% (-72.1 to -35.9%)  |
|                           |                   | Oman                         | 8.3% (-0.2–15.8%)    | -0.8% (-89.9 to 111%)     | 41.94 (-1.02–84.27)   | -60.2% (-95.7 to -17.3%)  |
|                           |                   | Qatar                        | 8.6% (0.6–15.9%)     | -2.1% (-99.3 to 81.5%)    | 21.03 (1.39–41.05)    | -57.1% (-99.6 to -17%)    |
|                           |                   | Saudi Arabia                 | 6.9% (3.1–10.5%)     | 3.8% (-24.6 to 58.7%)     | 52.84 (21.72–86.32)   | -39% (-62.7 to 7.1%)      |
|                           |                   | Syrian Arab Republic         | 7.3% (4.3–10.7%)     | 1% (-6.8 to 15.6%)        | 60.9 (31.87–96.51)    | -48% (-63.9 to -25.5%)    |
|                           |                   | Tunisia                      | 6.5% (3–10.4%)       | 2.4% (-22.5 to 13.1%)     | 20.94 (9.22–36.61)    | -55.6% (-71 to -33%)      |
|                           |                   | Türkiye                      | 10.1% (7.2–12.8%)    | -8.6% (-12.6 to -4.4%)    | 40.16 (26.97–54.94)   | -42.4% (-59.2 to -24.7%)  |
|                           |                   | United Arab Emirates         | 9.9% (-0.8–19.1%)    | 2.1% (-173.2 to 132.8%)   | 44.78 (-3.59–100.59)  | -63.1% (-126.4 to -15.4%) |
|                           |                   | Yemen                        | 5.6% (2.2–8.9%)      | -4.2% (-52.5 to 67.2%)    | 49.91 (18.82–87.64)   | -55.6% (-79 to -19.9%)    |
|                           |                   | Afghanistan                  | 9.8% (7.2–13.1%)     | -0.4% (-7.5 to 7.7%)      | 136.39 (83.5–198.16)  | -46.2% (-59.8 to -28.2%)  |
|                           |                   | Sudan                        | 6.5% (2.2–10.5%)     | 8.4% (-47.5 to 77.6%)     | 49.93 (16.66–91.2)    | -57.1% (-80.3 to -29.9%)  |
|                           |                   | Global                       | 6.4% (4.8–8.2%)      | -19.2% (-27.5 to -7.3%)   | 8.75 (6.57–11.35)     | -63% (-69.5 to -47.7%)    |
|                           |                   | North Africa and Middle East | 7.5% (5.4–9.6%)      | 4.9% (-10.2 to 29.3%)     | 7.04 (4.86–9.71)      | -61% (-71.5 to -33.3%)    |
|                           |                   | Algeria                      | 6.8% (3.5–9.9%)      | -3.1% (-16.4 to 24.8%)    | 5.25 (2.55–8.36)      | -65.7% (-77.2 to -40.7%)  |
|                           |                   | Bahrain                      | 6.2% (2.1–10.1%)     | -0.6% (-35.6 to 34.4%)    | 3.94 (1.22–7.21)      | -58.1% (-75.1 to -33.9%)  |
|                           |                   | Egypt                        | 5.6% (2.6–9.6%)      | 6% (-24.4 to 58.5%)       | 6.5 (2.6–12.07)       | -75.9% (-86.4 to -42.5%)  |
|                           |                   | Iran                         | 8.3% (6.6–10.2%)     | -4.5% (-11.6 to 5.2%)     | 4.55 (3.48–5.89)      | -57.7% (-70.9 to -32.4%)  |
|                           |                   | Iraq                         | 6.9% (3.9–9.8%)      | 4.3% (-10.8 to 26.2%)     | 5.01 (2.66–8.3)       | -62.4% (-77.3 to -33.3%)  |
|                           |                   | Jordan                       | 4.9% (1.9–8.4%)      | -12.3% (-24.3 to 13.8%)   | 1.91 (0.72–3.36)      | -56% (-71.1 to -25.8%)    |
|                           |                   | Kuwait                       | 7% (1.1–12.2%)       | -1.5% (-32.3 to 19.9%)    | 3.3 (0.51–5.91)       | -35.9% (-58.2 to -1.5%)   |
|                           |                   | Lebanon                      | 5.8% (3.8–8.1%)      | -30.9% (-47.2 to -17%)    | 1.57 (0.78–2.52)      | -75.2% (-88 to -53.4%)    |
|                           |                   | Libya                        | 5.1% (1.9–9%)        | -0.3% (-32.5 to 20.5%)    | 3.71 (1.28–7.18)      | -66.7% (-81.7 to -37%)    |
|                           |                   | Morocco                      | 7% (4.8–9.5%)        | -4.7% (-11.4 to 1.4%)     | 7.08 (4.12–11.79)     | -60.6% (-74.5 to -31.7%)  |
|                           |                   | Palestine                    | 4.7% (1.8–9%)        | -12.1% (-39.4 to 30.1%)   | 2.36 (0.52–4.64)      | -52.5% (-70.7 to -13.8%)  |
|                           |                   | Oman                         | 8% (-0.2–15.5%)      | -3.9% (-89.9 to 104.4%)   | 7.09 (-0.21–16.61)    | -64% (-95.8 to -13.1%)    |
|                           |                   | Qatar                        | 8.6% (0.6–15.7%)     | -2.9% (-99.3 to 79.9%)    | 7.2 (0.44–14.58)      | -55.2% (-99.6 to -8.2%)   |
| Saudi Arabia              | 6.3% (2.7–9.6%)   | -2.6% (-29.4 to 51.6%)       | 3.11 (1.19–5.37)     | -53.6% (-76.5 to -4.7%)   |                       |                           |
| Syrian Arab Republic      | 7% (4.1–10.3%)    | -3% (-11 to 11.1%)           | 7.64 (4.23–12.09)    | -66.8% (-77.2 to -47%)    |                       |                           |
| Tunisia                   | 5.9% (2.7–9.4%)   | -4.6% (-28.5 to 7.2%)        | 3.79 (1.63–6.87)     | -64.4% (-80.3 to -35.4%)  |                       |                           |
| Türkiye                   | 9.8% (7–12.5%)    | -9.1% (-14.7 to -2.3%)       | 9.86 (6.54–13.74)    | -45.5% (-66.6 to 0.9%)    |                       |                           |
| United Arab Emirates      | 9.3% (-0.8–18.4%) | -2.7% (-170.5 to 113.2%)     | 5.66 (-0.45–13.58)   | -64.9% (-123.4 to -19.3%) |                       |                           |
| Yemen                     | 5.5% (2.2–8.6%)   | -5.5% (-52.8 to 65.5%)       | 9.15 (2.48–18.46)    | -51.5% (-76.5 to 0.2%)    |                       |                           |
| Afghanistan               | 9.6% (7–12.8%)    | -1% (-8.4 to 6.7%)           | 22.79 (6.89–42.36)   | -44.3% (-60.1 to -15%)    |                       |                           |
| Sudan                     | 6.2% (2.2–10.2%)  | 5.8% (-49.4 to 75.1%)        | 7.77 (2.14–16.77)    | -61.4% (-82.8 to -15.5%)  |                       |                           |
| Global                    | 4.6% (2.7–6.7%)   | -5.1% (-11.8 to 0.8%)        | 81.97 (47.86–119.11) | -38.5% (-45.6 to -31.2%)  |                       |                           |
| Other environmental risks | Stroke            | North Africa and Middle East | 5.2% (3.3–7.3%)      | -12.9% (-22.2 to -5.2%)   | 95.53 (57.79–137.74)  | -40.8% (-50.5 to -30.4%)  |
|                           |                   | Algeria                      | 3.2% (1.4–5.1%)      | -18.1% (-31 to -8.7%)     | 55.52 (24.56–93.24)   | -54.7% (-65.8 to -42.4%)  |
|                           |                   | Bahrain                      | 2.2% (0.7–3.9%)      | -19.2% (-33 to -9.6%)     | 20.3 (6.16–38.15)     | -61.6% (-70.9 to -52.2%)  |
|                           |                   | Egypt                        | 5.5% (3.5–7.7%)      | 14.3% (-5.9 to 33.7%)     | 118.05 (65.72–186.59) | -25.9% (-45.2 to -2.3%)   |
|                           |                   | Iran                         | 6.9% (4.7–9.3%)      | -13.9% (-21.7 to -7%)     | 87.46 (57.78–117.89)  | -53.2% (-60.6 to -45.7%)  |
|                           |                   | Iraq                         | 3.9% (2–5.9%)        | -11.6% (-22.2 to -3.2%)   | 113.88 (55.77–181.64) | -28.8% (-45.5 to -9.4%)   |
|                           |                   | Jordan                       | 2.9% (1.2–4.7%)      | -21.2% (-35.2 to -12.4%)  | 41.44 (16.91–70)      | -60.7% (-71 to -51.7%)    |

**Table S15** Burden of neurological conditions attributable to risk factors in North Africa and Middle East countries

| Risk factors              | Causes               | Locations                    | DALYs (95% UI)           |                          |                          |                          |
|---------------------------|----------------------|------------------------------|--------------------------|--------------------------|--------------------------|--------------------------|
|                           |                      |                              | PAF (%)                  | PAF change (%)           | Rate per 100,000         | Rate change (%)          |
|                           |                      |                              | 2019                     | From 1990 to 2019        | 2019                     | From 1990 to 2019        |
| Ischaemic stroke          |                      | Kuwait                       | 2.7% (1.1–4.6%)          | -18.1% (-31.9 to -9.8%)  | 25.79 (10.26–44.16)      | -27.7% (-43.4 to -12.5%) |
|                           |                      | Lebanon                      | 2.7% (1.2–4.6%)          | -30.6% (-45.5 to -20.3%) | 20.55 (8.06–37.01)       | -53.9% (-68.3 to -40.4%) |
|                           |                      | Libya                        | 2.2% (0.8–4%)            | -34.4% (-56.3 to -19.8%) | 35.29 (11.24–68.24)      | -48.3% (-67.9 to -29.9%) |
|                           |                      | Morocco                      | 3.8% (1.9–6%)            | -18.9% (-30.7 to -9.3%)  | 85.96 (41.67–138.88)     | -32.9% (-49.7 to -14.3%) |
|                           |                      | Palestine                    | 3.9% (2.1–5.9%)          | -22.7% (-35.7 to -14.6%) | 83.3 (43.53–130.17)      | -47.8% (-60.9 to -32.8%) |
|                           |                      | Oman                         | 3.1% (1.4–4.9%)          | -27.2% (-42.2 to -16%)   | 57.66 (25.62–93.96)      | -55.4% (-69.1 to -39.8%) |
|                           |                      | Qatar                        | 1.8% (0.4–3.5%)          | -5.2% (-17.1 to 6.7%)    | 16.2 (3.34–33.28)        | -47.6% (-61.2 to -3.7%)  |
|                           |                      | Saudi Arabia                 | 3.9% (1.9–6.1%)          | -26.4% (-40.9 to -16.8%) | 82.91 (40.04–132.48)     | -47.8% (-64.1 to -28.8%) |
|                           |                      | Syrian Arab Republic         | 5.1% (3–7.2%)            | -11.7% (-21.5 to -2.4%)  | 102.23 (57.33–157.04)    | -47.2% (-62.5 to -27.4%) |
|                           |                      | Tunisia                      | 4.1% (2.2–6.1%)          | -21.3% (-34.8 to -11.7%) | 60.6 (29.74–97.85)       | -40.8% (-59.1 to -20%)   |
|                           |                      | Türkiye                      | 1.9% (0.5–3.7%)          | -27.1% (-48.4 to -17.3%) | 22.68 (5.49–45.3)        | -44.4% (-64.6 to -27.8%) |
|                           |                      | United Arab Emirates         | 1.7% (0.3–3.4%)          | -40.4% (-69.2 to -26.2%) | 32.39 (5.88–69.53)       | -67.9% (-84.3 to -54.1%) |
|                           |                      | Yemen                        | 10.9% (8.2–13.7%)        | -3.9% (-13.2 to 6.2%)    | 301.92 (197.4–425.53)    | -27.5% (-46 to -2.3%)    |
|                           |                      | Afghanistan                  | 12.4% (9.4–15.4%)        | 6.2% (-3 to 16.3%)       | 434.86 (284.77–613.55)   | -16.9% (-37.4 to 7%)     |
|                           |                      | Sudan                        | 8.9% (6.4–11.5%)         | -8.2% (-18.2 to 3.2%)    | 230.73 (144.66–348.1)    | -38.6% (-52.1 to -21.3%) |
|                           |                      | Global                       | 4% (2.3–6%)              | 21.2% (12 to 36.6%)      | 32.21 (18.17–48.71)      | -13.4% (-25.7 to 0.9%)   |
|                           |                      | North Africa and Middle East | 5.2% (3.2–7.4%)          | -7.1% (-13.5 to -2.2%)   | 61.25 (36.23–88.95)      | -15.2% (-28.5 to -3.3%)  |
|                           |                      | Algeria                      | 3.2% (1.5–5.1%)          | -9.4% (-20.9 to -2.2%)   | 40.43 (17.59–68.94)      | -31.8% (-47.6 to -15.1%) |
|                           |                      | Bahrain                      | 2.2% (0.7–3.9%)          | -12.1% (-25.2 to -0.9%)  | 13.21 (4.22–24.75)       | -50.6% (-62.2 to -39.5%) |
|                           |                      | Egypt                        | 5.8% (3.7–8.2%)          | 10.2% (-2.6 to 23.8%)    | 80.62 (45.74–126.67)     | 25.7% (-9.4 to 61.9%)    |
|                           |                      | Iran                         | 6.8% (4.5–9.4%)          | -9.7% (-17.2 to -1.8%)   | 67.25 (43.84–92.75)      | -48.3% (-57.3 to -39.8%) |
|                           |                      | Iraq                         | 3.9% (2–6%)              | -5.7% (-15 to 2.9%)      | 71.04 (35.62–113.25)     | -12.3% (-31.8 to 9%)     |
|                           |                      | Jordan                       | 2.8% (1.2–4.7%)          | -17.1% (-31.5 to -8%)    | 30.72 (12.26–52.13)      | -55.4% (-66.6 to -45.7%) |
|                           |                      | Kuwait                       | 2.8% (1.1–4.7%)          | -13.7% (-27.4 to -4.1%)  | 17.84 (7.36–30.33)       | -24.1% (-39.7 to -8%)    |
|                           |                      | Lebanon                      | 2.8% (1.2–4.7%)          | -25.2% (-40.7 to -15.8%) | 16.74 (6.69–29.73)       | -36.4% (-55.9 to -17.9%) |
|                           |                      | Libya                        | 2.4% (0.8–4.2%)          | -31.6% (-54.1 to -19.1%) | 26.83 (8.7–50.65)        | -23.9% (-52.8 to 3%)     |
|                           |                      | Morocco                      | 3.8% (1.9–5.9%)          | -11.8% (-23.3 to -4.2%)  | 60.63 (28.96–98.1)       | 4.6% (-21.6 to 30%)      |
|                           |                      | Palestine                    | 3.9% (2.1–6%)            | -19.2% (-31.6 to -11.7%) | 61.91 (32.47–97.06)      | -33.5% (-50.8 to -15%)   |
|                           |                      | Oman                         | 3.1% (1.5–5.2%)          | -23.3% (-37.9 to -12%)   | 40.66 (18.41–67.86)      | -37.3% (-55.6 to -14.2%) |
|                           |                      | Qatar                        | 1.8% (0.4–3.5%)          | 0.5% (-13 to 71.6%)      | 10.2 (2.34–20.74)        | -35.3% (-51.9 to 15.6%)  |
|                           |                      | Saudi Arabia                 | 3.8% (1.9–5.9%)          | -18% (-31.2 to -9.1%)    | 49.96 (24.73–78.44)      | -32.3% (-51.5 to -12.4%) |
|                           |                      | Syrian Arab Republic         | 5% (3–7.3%)              | -7.7% (-17.3 to 1.3%)    | 54.04 (30.2–83.26)       | -30.8% (-51.6 to -7.3%)  |
|                           | Tunisia              | 4.1% (2.2–6.2%)              | -13.9% (-25.3 to -6%)    | 44.58 (21.23–72.76)      | -10.3% (-36 to 17.9%)    |                          |
|                           | Türkiye              | 2% (0.6–3.7%)                | -22.2% (-43.8 to -13%)   | 12.97 (3.61–25.41)       | -28.5% (-54.5 to -7.9%)  |                          |
|                           | United Arab Emirates | 1.7% (0.4–3.5%)              | -34.4% (-65.1 to -20.6%) | 24.4 (4.85–51.23)        | -56.8% (-78.4 to -40.3%) |                          |
|                           | Yemen                | 10.4% (7.5–13.6%)            | 7.3% (-0.1 to 15.4%)     | 179.54 (116.54–261.98)   | 28.5% (-0.3 to 67.1%)    |                          |
|                           | Afghanistan          | 11.6% (8.4–14.8%)            | 16.6% (8.7 to 25.6%)     | 216.31 (137.82–313.55)   | 48.3% (14 to 90.9%)      |                          |
|                           | Sudan                | 8.8% (6.1–11.7%)             | 2.3% (-5 to 10.3%)       | 148.38 (90.57–227.81)    | 10.5% (-13.1 to 39.3%)   |                          |
| Intracerebral haemorrhage |                      | Global                       | 5.3% (3–7.8%)            | -11.5% (-19.9 to -5.6%)  | 44.03 (25.12–65.69)      | -44% (-52.4 to -36.4%)   |
|                           |                      | North Africa and Middle East | 5.4% (3.2–8%)            | -19.1% (-29.6 to -9.5%)  | 29.89 (17.17–44.76)      | -60.9% (-68.6 to -52.2%) |
|                           |                      | Algeria                      | 3.2% (1.2–5.7%)          | -26.5% (-43.7 to -15.9%) | 12.88 (4.76–23.66)       | -76.4% (-83.7 to -67.8%) |
|                           |                      | Bahrain                      | 2.3% (0.6–4.4%)          | -26.8% (-46.4 to -15.3%) | 5.97 (1.56–12.63)        | -73.7% (-82.1 to -64.7%) |
|                           |                      | Egypt                        | 5.2% (3–7.8%)            | 0.1% (-21.5 to 28.3%)    | 33.37 (17.23–58.74)      | -59.3% (-72.9 to -41.2%) |
|                           |                      | Iran                         | 7.4% (4.8–10.4%)         | -22.6% (-32.3 to -14%)   | 16.5 (10.6–23.14)        | -64.1% (-70.6 to -56.5%) |
|                           |                      | Iraq                         | 4% (1.7–6.6%)            | -18.3% (-33.3 to -8.1%)  | 40.41 (16.84–70.47)      | -42.8% (-59.5 to -23.5%) |
|                           |                      | Jordan                       | 3% (1–5.4%)              | -27.2% (-45.4 to -16.2%) | 9.77 (3.34–17.91)        | -70.9% (-79.9 to -61.9%) |
|                           |                      | Kuwait                       | 2.8% (0.9–5.1%)          | -27.1% (-46.5 to -15.8%) | 6.88 (2.27–12.72)        | -30.2% (-52.3 to -8.2%)  |
|                           |                      | Lebanon                      | 2.6% (0.9–4.8%)          | -41.5% (-60.2 to -29.4%) | 3.28 (1.09–6.76)         | -78.9% (-87 to -69.8%)   |
|                           |                      | Libya                        | 2% (0.5–4%)              | -46.7% (-70.5 to -29.4%) | 7.37 (1.84–15.92)        | -74% (-86.4 to -60.8%)   |
|                           |                      | Morocco                      | 3.9% (1.7–6.4%)          | -24.6% (-41 to -14.1%)   | 21.79 (9.07–37.77)       | -63.1% (-74.6 to -48.2%) |
|                           |                      | Palestine                    | 4.1% (1.9–6.5%)          | -26.5% (-42.6 to -16.8%) | 19.78 (9.06–33.03)       | -68.1% (-77.9 to -57.4%) |



**Table S15** Burden of neurological conditions attributable to risk factors in North Africa and Middle East countries

| Risk factors             | Causes      | Locations                    | DALYs (95% UI)        |                          |                          |                          |                          |
|--------------------------|-------------|------------------------------|-----------------------|--------------------------|--------------------------|--------------------------|--------------------------|
|                          |             |                              | PAF (%)               | PAF change (%)           | Rate per 100,000         | Rate change (%)          |                          |
|                          |             |                              | 2019                  | From 1990 to 2019        | 2019                     | From 1990 to 2019        |                          |
| Subarachnoid haemorrhage |             | Oman                         | 3% (1.1–5.2%)         | -33.7% (-52.8 to -21.1%) | 15 (5.51–26.98)          | -73.4% (-83.3 to -61.8%) |                          |
|                          |             | Qatar                        | 1.9% (0.3–3.9%)       | -9.2% (-25 to 52.7%)     | 4.59 (0.72–10.19)        | -60.3% (-73.2 to -29.2%) |                          |
|                          |             | Saudi Arabia                 | 4.1% (1.8–6.8%)       | -32.6% (-51 to -21.2%)   | 31.41 (13.46–54.04)      | -60.5% (-75 to -41.4%)   |                          |
|                          |             | Syrian Arab Republic         | 5.4% (3–8.1%)         | -18.2% (-30.3 to -7.9%)  | 45.05 (23.41–72.58)      | -57.9% (-71.1 to -39.8%) |                          |
|                          |             | Tunisia                      | 4.2% (2–6.8%)         | -27.7% (-43.3 to -17.2%) | 13.67 (5.99–23.64)       | -68.6% (-79.9 to -53.5%) |                          |
|                          |             | Türkiye                      | 2% (0.4–4.1%)         | -29.7% (-57.1 to -16.4%) | 8.05 (1.46–17.22)        | -55.8% (-75.2 to -38.3%) |                          |
|                          |             | United Arab Emirates         | 1.6% (0.2–3.7%)       | -49.8% (-81.3 to -33%)   | 7.21 (0.84–19.06)        | -82% (-93.7 to -71%)     |                          |
|                          |             | Yemen                        | 11.8% (8.4–15.4%)     | -6% (-13.6 to 1.9%)      | 104.35 (65.96–154.61)    | -56.5% (-68.4 to -39%)   |                          |
|                          |             | Afghanistan                  | 13.5% (9.7–17.5%)     | 6.4% (-0.6 to 14.1%)     | 188.01 (116.69–272.63)   | -42.6% (-57.3 to -23.8%) |                          |
|                          |             | Sudan                        | 9.3% (6.1–12.6%)      | -12.7% (-23.1 to -1.9%)  | 71.77 (41.91–112.07)     | -65.7% (-75.2 to -53.2%) |                          |
|                          |             | Global                       | 4.2% (2.1–6.6%)       | -28.2% (-40.6 to -18%)   | 5.73 (2.8–9.26)          | -67.3% (-74.9 to -50.2%) |                          |
|                          |             | North Africa and Middle East | 4.6% (2.5–7.1%)       | -4.7% (-20.6 to 19.1%)   | 4.39 (2.14–7.27)         | -64.8% (-74.1 to -46.8%) |                          |
|                          |             | Algeria                      | 2.9% (1.5–5.2%)       | -27.2% (-48.5 to -12.5%) | 2.2 (0.73–4.21)          | -74.2% (-84.5 to -58%)   |                          |
|                          |             | Bahrain                      | 1.8% (0.4–3.7%)       | -21.7% (-47.7 to -1.8%)  | 1.12 (0.23–2.53)         | -67% (-82 to -50.7%)     |                          |
|                          |             | Egypt                        | 3.5% (1.8–5.9%)       | 31.8% (-17.3 to 155.6%)  | 4.07 (1.89–7.55)         | -69.5% (-82.7 to -41.9%) |                          |
|                          |             | Iran                         | 6.8% (4.2–9.8%)       | -23.7% (-37 to -12.3%)   | 3.71 (2.21–5.45)         | -66.2% (-77.3 to -47%)   |                          |
|                          |             | Iraq                         | 3.4% (1.2–5.9%)       | -17.5% (-38.2 to -3.9%)  | 2.42 (0.87–4.68)         | -70.3% (-82.3 to -49.9%) |                          |
|                          |             | Jordan                       | 2.5% (0.7–4.8%)       | -37.9% (-58.5 to -24.6%) | 0.96 (0.26–1.94)         | -68.8% (-82.6 to -54.5%) |                          |
|                          |             | Kuwait                       | 2.3% (0.7–4.4%)       | -28.8% (-51.9 to -12.3%) | 1.07 (0.3–2.11)          | -53.6% (-70.9 to -36.8%) |                          |
|                          |             | Lebanon                      | 2% (0.6–4.2%)         | -45.5% (-67.8 to -29.7%) | 0.54 (0.14–1.21)         | -80.5% (-91.4 to -66.3%) |                          |
|                          |             | Libya                        | 1.5% (0.4–3.3%)       | -31.7% (-62.9 to 5.4%)   | 1.09 (0.25–2.47)         | -76.9% (-88.3 to -62.2%) |                          |
|                          |             | Morocco                      | 3.5% (1.4–6%)         | -22.2% (-39.8 to -8.5%)  | 3.55 (1.29–6.82)         | -68% (-79.7 to -46.5%)   |                          |
|                          |             | Palestine                    | 3.2% (1.3–5.6%)       | -33.1% (-50.4 to -21.8%) | 1.61 (0.63–2.93)         | -63.8% (-77.7 to -46.2%) |                          |
|                          |             | Oman                         | 2.2% (0.7–4.2%)       | -33.6% (-58.1 to -10.2%) | 2.01 (0.52–4.68)         | -74.7% (-87.9 to -52.8%) |                          |
|                          |             | Qatar                        | 1.7% (0.2–3.8%)       | -14.4% (-34.1 to 46.6%)  | 1.42 (0.17–3.49)         | -60.8% (-79.1 to -16.6%) |                          |
|                          |             | Saudi Arabia                 | 3.1% (1.2–5.6%)       | -42.7% (-65.2 to -26.3%) | 1.55 (0.55–3)            | -72.8% (-88.2 to -52.3%) |                          |
|                          |             | Syrian Arab Republic         | 2.9% (1.4–4.6%)       | 7.5% (-26.7 to 53.6%)    | 3.14 (1.46–5.6)          | -62.9% (-79.2 to -37.6%) |                          |
|                          |             | Tunisia                      | 3.6% (1.5–6.1%)       | -30.2% (-50.7 to -14.5%) | 2.35 (0.86–4.43)         | -74% (-85.9 to -54.9%)   |                          |
|                          |             | Türkiye                      | 1.6% (0.2–3.8%)       | -37.6% (-64.8 to -22.6%) | 1.66 (0.24–3.94)         | -62.6% (-83.9 to -35.4%) |                          |
|                          |             | United Arab Emirates         | 1.2% (0.1–3.1%)       | -50.8% (-80.1 to -29.2%) | 0.77 (0.07–2.17)         | -82.3% (-94 to -68.4%)   |                          |
|                          | Yemen       | 10.9% (7.4–14.5%)            | -4.5% (-15 to 7.2%)   | 18.03 (8.09–33.89)       | -51.2% (-66.5 to -22.7%) |                          |                          |
|                          | Afghanistan | 12.9% (9.1–17.2%)            | 8.4% (-0.5 to 18.6%)  | 30.54 (11.05–58.12)      | -39.1% (-57.1 to -5.9%)  |                          |                          |
|                          | Sudan       | 8.5% (5.4–11.9%)             | -8.9% (-24.2 to 9.7%) | 10.59 (4.6–19.87)        | -67.3% (-78.7 to -39.5%) |                          |                          |
| Tobacco                  | Stroke      | Global                       | 20% (18.6–21.4%)      | -9.6% (-13.8 to -5.3%)   | 353.87 (316–391.5)       | -41.4% (-47.4 to -35.5%) |                          |
|                          |             | North Africa and Middle East | 16.9% (15.6–18.1%)    | -4.1% (-10.2 to 2%)      | 307.84 (267.1–351)       | -34.8% (-44 to -23.9%)   |                          |
|                          |             |                              | Algeria               | 15.4% (13.9–17.1%)       | -11.7% (-19.1 to -3.9%)  | 270.63 (214.67–337.92)   | -51.1% (-61.5 to -37.8%) |
|                          |             |                              | Bahrain               | 13.7% (12.1–15.6%)       | -26.1% (-36.1 to -14.6%) | 128.88 (103.8–164)       | -64.9% (-72.6 to -55.1%) |
|                          |             |                              | Egypt                 | 16.6% (14.7–19%)         | 40.6% (17.2 to 63%)      | 356.02 (258.59–498.99)   | -8.8% (-31.7 to 21.6%)   |
|                          |             |                              | Iran                  | 14.5% (13.3–15.8%)       | -14.6% (-21.9 to -6.5%)  | 182.93 (162.77–202.43)   | -53.6% (-60.5 to -46%)   |
|                          |             |                              | Iraq                  | 21.7% (19.5–23.7%)       | -13.2% (-21.7 to -3.6%)  | 633.82 (495.23–781.65)   | -30% (-47.4 to -8.6%)    |
|                          |             |                              | Jordan                | 20.7% (18.7–22.6%)       | -17.3% (-25.9 to -7.9%)  | 299.94 (240.03–359.36)   | -58.8% (-67.6 to -49%)   |
|                          |             |                              | Kuwait                | 18.5% (16.9–20.2%)       | -7.6% (-16.8 to 1.9%)    | 174.07 (144.23–209.58)   | -18.3% (-33.4 to -0.4%)  |
|                          |             |                              | Lebanon               | 28.7% (26.2–31.5%)       | 20.7% (7.2 to 35.6%)     | 216.26 (166.97–275.52)   | -20% (-39 to 3.5%)       |
|                          |             |                              | Libya                 | 15.7% (13.7–18%)         | 1.3% (-10 to 15%)        | 246.48 (181.03–335.41)   | -20.3% (-39.9 to 8.1%)   |
|                          |             |                              | Morocco               | 11.6% (10.2–13.1%)       | -26.2% (-33.9 to -17.6%) | 262 (197.05–333.24)      | -38.8% (-54.5 to -20.8%) |
|                          |             |                              | Palestine             | 17.2% (15.5–19.2%)       | -10% (-20 to 0.5%)       | 366.96 (306.71–432.28)   | -39.3% (-53.7 to -19.2%) |
|                          |             |                              | Oman                  | 9.2% (8.1–10.5%)         | -34.1% (-43.7 to -22.8%) | 174.13 (144.52–213.13)   | -59.6% (-70.3 to -43.4%) |
|                          |             |                              | Qatar                 | 12.1% (10.7–13.5%)       | -16.3% (-28 to -2.6%)    | 109.11 (85.34–138.58)    | -53.7% (-66.3 to -37.6%) |
|                          |             |                              | Saudi Arabia          | 15.1% (13.2–17%)         | 9.3% (-6.3 to 27.1%)     | 318.79 (233.57–399.32)   | -22.5% (-45.1 to 10.2%)  |
|                          |             |                              | Syrian Arab Republic  | 18.9% (17.2–20.7%)       | -14.9% (-23.8 to -5.3%)  | 382.18 (284.82–508.54)   | -49.1% (-63.6 to -26.9%) |
|                          |             |                              | Tunisia               | 18.6% (16.8–20.5%)       | -11.5% (-19.8 to -2.6%)  | 275.41 (202.54–364.6)    | -33.3% (-52 to -8.7%)    |

**Table S15** Burden of neurological conditions attributable to risk factors in North Africa and Middle East countries

| Risk factors              | Causes | Locations                    | DALYs (95% UI)     |                          |                        |                          |
|---------------------------|--------|------------------------------|--------------------|--------------------------|------------------------|--------------------------|
|                           |        |                              | PAF (%)            | PAF change (%)           | Rate per 100,000       | Rate change (%)          |
|                           |        |                              | 2019               | From 1990 to 2019        | 2019                   | From 1990 to 2019        |
| Ischaemic stroke          |        | Türkiye                      | 21·3% (19·6–23%)   | -22·3% (-29·2 to -14·9%) | 247·41 (201·12–297·98) | -40·6% (-58·4 to -23·1%) |
|                           |        | United Arab Emirates         | 17% (15–19%)       | 10·1% (-3·4 to 26·4%)    | 326·93 (240·88–435·43) | -40·6% (-57·6 to -17·6%) |
|                           |        | Yemen                        | 21·7% (19·5–23·9%) | -5·7% (-16·7 to 7·3%)    | 599·78 (453·71–789·59) | -28·9% (-47·3 to -1%)    |
|                           |        | Afghanistan                  | 11·8% (10·3–13·4%) | 33·8% (19·7 to 51·4%)    | 411·89 (293·62–559·68) | 4·7% (-22·3 to 39·4%)    |
|                           |        | Sudan                        | 14·8% (12·5–17·2%) | -8% (-21·2 to 8·2%)      | 383·88 (269·68–549·76) | -38·3% (-54 to -18%)     |
|                           |        | Global                       | 17·6% (16·4–18·7%) | -8% (-12·3 to -4%)       | 140·23 (124·51–155·91) | -34·2% (-41·7 to -28·2%) |
|                           |        | North Africa and Middle East | 15·6% (14·4–16·8%) | -7% (-12·4 to -1·8%)     | 184·39 (160·98–210·02) | -15·1% (-31·8 to -2·3%)  |
|                           |        | Algeria                      | 14·5% (12·9–16·1%) | -8·5% (-16·8 to 1·5%)    | 184·78 (144·73–232·03) | -31·1% (-46·2 to -12%)   |
|                           |        | Bahrain                      | 12·4% (10·9–14·3%) | -25·1% (-35·3 to -11·9%) | 76·35 (61·83–97·5)     | -57·9% (-67·1 to -47%)   |
|                           |        | Egypt                        | 16·8% (14·8–19%)   | 27·3% (8·8 to 46·9%)     | 232·04 (171·01–319·44) | 45·1% (3·3 to 91·2%)     |
|                           |        | Iran                         | 13·7% (12·5–15%)   | -14·9% (-22·4 to -6·5%)  | 135·02 (118·97–150·08) | -51·3% (-59 to -43·6%)   |
|                           |        | Iraq                         | 19·8% (17·8–21·8%) | -14·6% (-23·5 to -3·8%)  | 363·31 (288·42–438·92) | -20·5% (-39·1 to 2·3%)   |
|                           |        | Jordan                       | 19·2% (17·3–21%)   | -17·1% (-25·5 to -7·8%)  | 208·23 (166·88–248·74) | -55·5% (-65·1 to -45·2%) |
|                           |        | Kuwait                       | 16·9% (15·3–18·6%) | -9·6% (-19·2 to 0·6%)    | 109·15 (88·86–132·26)  | -20·4% (-34·5 to -2·6%)  |
|                           |        | Lebanon                      | 27·8% (25·4–30·5%) | 27·8% (12·7 to 45·1%)    | 166·23 (128·64–205·97) | 8·5% (-17·5 to 37·7%)    |
|                           |        | Libya                        | 15% (13·1–17·1%)   | 0·1% (-11·6 to 12·5%)    | 169·09 (122·76–230·36) | 11·4% (-17·7 to 49·2%)   |
|                           |        | Morocco                      | 10·6% (9·3–12%)    | -21·8% (-30·7 to -11·5%) | 169·87 (129·2–212·95)  | -7·3% (-31·9 to 20·9%)   |
|                           |        | Palestine                    | 15·9% (14·2–17·8%) | -8·8% (-19·4 to 2·9%)    | 253·67 (209·27–300·08) | -25·1% (-43·1 to -1·4%)  |
|                           |        | Oman                         | 9·2% (8·1–10·4%)   | -36·8% (-46·3 to -25%)   | 119·18 (97·9–143·3)    | -48·4% (-62·3 to -27·8%) |
|                           |        | Qatar                        | 10·3% (9·1–11·7%)  | -16·7% (-28·7 to -1·6%)  | 59·79 (46·94–76·51)    | -46·2% (-59·6 to -27·9%) |
|                           |        | Saudi Arabia                 | 13·2% (11·5–15%)   | 12·9% (-4·1 to 31·7%)    | 171·58 (126·03–213·53) | -6·8% (-34·6 to 28·8%)   |
|                           |        | Syrian Arab Republic         | 17·3% (15·6–19%)   | -18·7% (-27·8 to -8·1%)  | 185·08 (140·78–241·25) | -39·1% (-57·3 to -14·2%) |
|                           |        | Tunisia                      | 17·5% (15·7–19·4%) | -8·8% (-18·2 to 1·4%)    | 190·69 (141·54–252·24) | -5% (-32·8 to 28·6%)     |
|                           |        | Türkiye                      | 17·6% (16–19·2%)   | -24·7% (-32·2 to -15·9%) | 116·75 (95·1–141·19)   | -30·7% (-52·7 to -10·7%) |
|                           |        | United Arab Emirates         | 15·7% (13·9–17·6%) | 14·6% (0 to 32·7%)       | 221·74 (167·39–284·63) | -24·3% (-45·4 to 4·5%)   |
|                           |        | Yemen                        | 19·9% (17·9–21·9%) | 1·7% (-10·8 to 16·2%)    | 341·06 (265·69–450·12) | 21·7% (-9 to 65·4%)      |
| Intracerebral haemorrhage |        | Afghanistan                  | 10·4% (8·9–11·8%)  | 38·6% (23·3 to 56·9%)    | 193·78 (141·61–268·99) | 76·2% (31·5 to 133·2%)   |
|                           |        | Sudan                        | 13·7% (11·6–16·1%) | -0·8% (-15·8 to 16·1%)   | 233·26 (163·03–351·84) | 7·4% (-19·8 to 44·3%)    |
|                           |        | Global                       | 22·1% (20·4–23·7%) | -8·2% (-13·1 to -3·3%)   | 183·87 (163·13–204·49) | -41·9% (-49·4 to -34·9%) |
|                           |        | North Africa and Middle East | 19·4% (17·9–21%)   | 1·5% (-6·1 to 9·6%)      | 106·55 (90·31–125·1)   | -51% (-58·9 to -40·7%)   |
|                           |        | Algeria                      | 17·9% (15·8–20·2%) | -8·8% (-17·8 to 0·5%)    | 72·12 (53·89–93·77)    | -70·7% (-78·6 to -60·1%) |
|                           |        | Bahrain                      | 16% (14·1–18·3%)   | -26·4% (-36·2 to -15·2%) | 42·38 (32·66–54·88)    | -73·6% (-80·2 to -64·5%) |
|                           |        | Egypt                        | 17% (14·1–20%)     | 35% (8·2 to 67·9%)       | 109·94 (71·9–171·21)   | -45% (-63·2 to -19·6%)   |
|                           |        | Iran                         | 17·4% (15·9–18·8%) | -12·3% (-19·4 to -3·8%)  | 38·75 (34·91–42·99)    | -59·3% (-65·9 to -51·5%) |
|                           |        | Iraq                         | 24·9% (22·5–27·2%) | -10·2% (-19·7 to 0%)     | 254·64 (191·42–329·95) | -37·1% (-54·7 to -14·2%) |
|                           |        | Jordan                       | 25% (22·6–27·4%)   | -14·2% (-23·9 to -4·4%)  | 81·39 (64·8–99·66)     | -65·7% (-73·5 to -56%)   |
|                           |        | Kuwait                       | 22·6% (20·6–24·6%) | -4·8% (-14·3 to 5·7%)    | 55·61 (44·2–68·97)     | -8·7% (-29·5 to 17·2%)   |
|                           |        | Lebanon                      | 32% (29·2–35·2%)   | 17·2% (5 to 31%)         | 41·18 (29·96–57·1)     | -57·8% (-70·6 to -40%)   |
|                           |        | Libya                        | 17·7% (14·6–21%)   | 1·3% (-15 to 20·1%)      | 66·71 (44·97–97·78)    | -50·5% (-66 to -27·1%)   |
|                           |        | Morocco                      | 14·2% (12·4–16·4%) | -22·4% (-31·7 to -12·6%) | 79·05 (56·44–105·4)    | -61·9% (-73·8 to -46·7%) |
|                           |        | Palestine                    | 21·2% (18·9–23·8%) | -3·5% (-14·7 to 8·9%)    | 103·32 (83·46–126·72)  | -58·2% (-69·2 to -42·5%) |
|                           |        | Oman                         | 9·2% (8–10·8%)     | -33% (-44·7 to -19·5%)   | 46·65 (37·55–62·91)    | -73·1% (-80·9 to -61·3%) |
|                           |        | Qatar                        | 14·6% (12·9–16·4%) | -13·1% (-25·4 to 2·9%)   | 35·58 (26·44–47·81)    | -62% (-73·8 to -47%)     |
|                           |        | Saudi Arabia                 | 18·1% (15·9–20·5%) | 12% (-4·1 to 31·7%)      | 138·77 (102–176·23)    | -34·4% (-55·3 to 2·7%)   |
|                           |        | Syrian Arab Republic         | 21·8% (19·8–23·8%) | -14·4% (-23 to -5%)      | 182·87 (133·16–249·79) | -55·8% (-69·1 to -34·5%) |
|                           |        | Tunisia                      | 22·1% (19·8–24·6%) | -6·8% (-17·2 to 3·6%)    | 71·29 (50·97–97·38)    | -59·4% (-72·9 to -39·8%) |
|                           |        | Türkiye                      | 25·4% (23·2–27·5%) | -17·5% (-26·2 to -8·8%)  | 101·31 (81·14–125·61)  | -48·1% (-65·2 to -30·6%) |
|                           |        | United Arab Emirates         | 20·7% (18·2–23·2%) | 12·8% (-2·5 to 30·1%)    | 93·26 (62·81–138·84)   | -59·5% (-74·5 to -38·8%) |
|                           |        | Yemen                        | 24·9% (22·4–27·6%) | -2·6% (-14·3 to 10·6%)   | 220·58 (158·34–303·79) | -54·9% (-68·3 to -33·9%) |
|                           |        | Afghanistan                  | 13·5% (11·7–15·6%) | 41·9% (26·6 to 62·2%)    | 188·56 (130·84–258·86) | -23·4% (-45·1 to 5·6%)   |
|                           |        | Sudan                        | 17% (14–20·2%)     | -5·5% (-20·3 to 13%)     | 131·16 (83·33–194·53)  | -62·7% (-74·1 to -45·6%) |



**Table S15** Burden of neurological conditions attributable to risk factors in North Africa and Middle East countries

| Risk factors                            | Causes           | Locations                    | DALYs (95% UI)     |                              |                       |                          |                      |                         |
|-----------------------------------------|------------------|------------------------------|--------------------|------------------------------|-----------------------|--------------------------|----------------------|-------------------------|
|                                         |                  |                              | PAF (%)            | PAF change (%)               | Rate per 100,000      | Rate change (%)          |                      |                         |
|                                         |                  |                              | 2019               | From 1990 to 2019            | 2019                  | From 1990 to 2019        |                      |                         |
| Subarachnoid haemorrhage                | Global           | Global                       | 21.8% (20.1–23.7%) | -13% (-18.8 to -2.3%)        | 29.77 (25.98–34.23)   | -60.2% (-66.8 to -40.1%) |                      |                         |
|                                         |                  | North Africa and Middle East | 18% (16.1–20.1%)   | 21.3% (0.3 to 50.2%)         | 16.9 (14.07–21.42)    | -55% (-67.9 to -29.2%)   |                      |                         |
|                                         |                  | Algeria                      | 17.8% (15.2–20.7%) | 0.4% (-15.5 to 21.9%)        | 13.73 (9.55–19.72)    | -64.4% (-76.6 to -42.7%) |                      |                         |
|                                         |                  | Bahrain                      | 16.1% (13.7–18.8%) | -3.4% (-22.1 to 20.9%)       | 10.14 (7.07–15.15)    | -59.4% (-74 to -37.6%)   |                      |                         |
|                                         |                  | Egypt                        | 12.2% (9.1–17.3%)  | 98.4% (31.3 to 254.7%)       | 14.04 (9.14–22.03)    | -54.4% (-73.3 to -14.1%) |                      |                         |
|                                         |                  | Iran                         | 16.8% (15.1–18.9%) | -4.9% (-20.2 to 17.7%)       | 9.16 (7.66–11.5)      | -57.9% (-71.2 to -34.7%) |                      |                         |
|                                         |                  | Iraq                         | 21.9% (19.2–25.1%) | 1% (-17.4 to 22.8%)          | 15.87 (11.26–23.42)   | -63.6% (-78.5 to -38.5%) |                      |                         |
|                                         |                  | Jordan                       | 26.5% (23.6–29.3%) | -11.8% (-23.1 to 1.4%)       | 10.32 (7.54–12.9)     | -55.7% (-70.3 to -35%)   |                      |                         |
|                                         |                  | Kuwait                       | 19.8% (17.9–21.9%) | -5.2% (-16.8 to 7.9%)        | 9.3 (7.38–11.51)      | -38.3% (-52.6 to -12.9%) |                      |                         |
|                                         |                  | Lebanon                      | 33.1% (29.6–37%)   | 27.3% (11.6 to 45%)          | 8.85 (6.09–12.7)      | -54.5% (-74 to -25.3%)   |                      |                         |
|                                         |                  | Libya                        | 14.8% (12–18.5%)   | 39.6% (1.3 to 99.7%)         | 10.69 (7.07–17.27)    | -52.9% (-69.9 to -21.6%) |                      |                         |
|                                         |                  | Morocco                      | 12.9% (10.8–15.3%) | -15.5% (-31.7 to 5.9%)       | 13.08 (8.3–20.69)     | -65.2% (-77.8 to -38%)   |                      |                         |
|                                         |                  | Palestine                    | 19.9% (17.3–22.5%) | 0.5% (-14.6 to 19.8%)        | 9.98 (7.62–12.41)     | -45.8% (-62.7 to -16.8%) |                      |                         |
|                                         |                  | Oman                         | 9.3% (7.7–11.6%)   | -15.9% (-37.4 to 21.3%)      | 8.3 (5.28–15.24)      | -68.6% (-81.8 to -34.8%) |                      |                         |
|                                         |                  | Qatar                        | 16.4% (14.1–18.7%) | -1.9% (-23.5 to 31.2%)       | 13.75 (9.63–18.78)    | -55.2% (-76 to -23.2%)   |                      |                         |
|                                         |                  | Saudi Arabia                 | 17% (14.4–19.8%)   | 11% (-13.4 to 42.8%)         | 8.44 (5.71–11.53)     | -47.4% (-72.7 to -7.2%)  |                      |                         |
|                                         |                  | Syrian Arab Republic         | 13% (10.5–16.3%)   | 27.3% (-10.2 to 79.1%)       | 14.23 (10.17–19.99)   | -56.2% (-74.2 to -23.8%) |                      |                         |
|                                         |                  | Tunisia                      | 20.7% (16.8–24.4%) | -1.3% (-20.8 to 23.8%)       | 13.43 (8.64–20.05)    | -63% (-78.4 to -34.8%)   |                      |                         |
|                                         |                  | Türkiye                      | 29.1% (26.4–31.6%) | -8.3% (-19.9 to 6.6%)        | 29.36 (22.47–37.18)   | -44.8% (-66 to -2.9%)    |                      |                         |
|                                         |                  | United Arab Emirates         | 19.5% (16.1–23%)   | 26.4% (2.8 to 60.4%)         | 11.92 (5.67–20.05)    | -55.3% (-75 to -23.2%)   |                      |                         |
|                                         |                  | Yemen                        | 23.1% (19.7–26.4%) | 0.2% (-14.7 to 20.6%)        | 38.15 (18.99–66.87)   | -48.9% (-65.7 to -13.1%) |                      |                         |
|                                         |                  | Afghanistan                  | 12.5% (9.4–15.1%)  | 40.2% (19 to 62.5%)          | 29.55 (10.27–55.61)   | -21.1% (-47.2 to 28.7%)  |                      |                         |
|                                         |                  | Sudan                        | 15.6% (11.9–19.3%) | 1.7% (-18.3 to 38.3%)        | 19.47 (9.49–36.91)    | -63.8% (-77.5 to -27.7%) |                      |                         |
|                                         |                  | Neurological disorders*      | Global             | Global                       | 3.6% (1.2–7.9%)       | -13.1% (-19.6 to -6.3%)  | 45.19 (14.11–110.93) | -14.3% (-20.7 to -7.7%) |
|                                         |                  |                              |                    | North Africa and Middle East | 3.9% (1.4–8.5%)       | -4.9% (-15 to 7.7%)      | 54.03 (17.76–133.86) | -9.3% (-18.6 to 5.1%)   |
|                                         |                  |                              |                    | Algeria                      | 5% (1.8–10.5%)        | -7.8% (-25.2 to 17.4%)   | 68.11 (22.21–168.08) | -16.6% (-31.9 to 2.7%)  |
|                                         |                  |                              |                    | Bahrain                      | 4.3% (1.5–9.3%)       | -3.5% (-25.8 to 32.5%)   | 59.06 (19.52–147.58) | -12.4% (-30.3 to 15.9%) |
|                                         |                  |                              |                    | Egypt                        | 5.1% (1.7–11.4%)      | 35.4% (11.7 to 66.1%)    | 67.6 (21.04–170.41)  | 36% (12.5 to 64.8%)     |
|                                         |                  |                              |                    | Iran                         | 3.2% (1.2–6.6%)       | -5.2% (-19.3 to 11.1%)   | 43.9 (15.3–103.21)   | -9.8% (-22.8 to 9.5%)   |
| Iraq                                    | 4.7% (1.5–10.2%) |                              |                    | -10.3% (-27.2 to 7.9%)       | 62.4 (18.59–157.58)   | -12.1% (-27.6 to 4.4%)   |                      |                         |
| Jordan                                  | 5.9% (2.1–12.6%) |                              |                    | -11.5% (-29.1 to 11.8%)      | 75.25 (25.73–180.58)  | -16.4% (-32.9 to 5%)     |                      |                         |
| Kuwait                                  | 5.3% (1.9–11%)   |                              |                    | 0.4% (-19.3 to 28.9%)        | 67.57 (24–157.09)     | -4.9% (-21.1 to 17.1%)   |                      |                         |
| Lebanon                                 | 8% (3–16.5%)     |                              |                    | 26.9% (2.6 to 61.2%)         | 106.34 (37.65–253.87) | 21.7% (-1.5 to 64.9%)    |                      |                         |
| Libya                                   | 3.6% (1.2–7.5%)  |                              |                    | -21.2% (-37.2 to -1.5%)      | 49.33 (15.38–122.14)  | -23.8% (-40.5 to -1.8%)  |                      |                         |
| Morocco                                 | 2.4% (0.8–5.3%)  |                              |                    | -28.2% (-45.3 to -10.8%)     | 32.56 (9.63–84.56)    | -26.7% (-43.5 to -11.5%) |                      |                         |
| Palestine                               | 3.9% (1.2–8.3%)  |                              |                    | -9.6% (-29 to 16.9%)         | 52.99 (15.44–138.04)  | -14.8% (-31.8 to 9.4%)   |                      |                         |
| Oman                                    | 2.3% (0.7–5%)    |                              |                    | -23.1% (-42.2 to 0.7%)       | 30.9 (8.53–76.91)     | -22.5% (-39.9 to 1.7%)   |                      |                         |
| Qatar                                   | 3.9% (1.2–8.6%)  |                              |                    | 56.4% (17.4 to 121.7%)       | 53.38 (13.73–139.17)  | 52.5% (12.9 to 114.8%)   |                      |                         |
| Saudi Arabia                            | 2.5% (0.8–5.6%)  |                              |                    | 3% (-29.9 to 47.1%)          | 35.89 (9.91–93.98)    | 2.8% (-27.6 to 47.7%)    |                      |                         |
| Syrian Arab Republic                    | 5% (1.7–10.6%)   |                              |                    | -15.4% (-32.9 to 6.2%)       | 65.3 (20.64–160.79)   | -14.3% (-34.1 to 13.8%)  |                      |                         |
| Tunisia                                 | 4.7% (1.6–9.7%)  |                              |                    | -15.2% (-30.7 to 4.2%)       | 62.44 (20.12–151.74)  | -17.3% (-33.8 to 9.5%)   |                      |                         |
| Türkiye                                 | 4% (1.5–8.3%)    |                              |                    | -12.8% (-29.5 to 14.7%)      | 59.17 (20.16–143.58)  | -21.3% (-35.1 to -0.3%)  |                      |                         |
| United Arab Emirates                    | 3.4% (1–8.2%)    |                              |                    | 20.9% (-11.6 to 68.3%)       | 49.74 (12.83–129.24)  | 12.4% (-15.1 to 53.1%)   |                      |                         |
| Yemen                                   | 4.8% (1.7–10.2%) |                              |                    | 14.1% (-8.6 to 39.4%)        | 63.18 (20.28–160.47)  | 11.1% (-12 to 37.7%)     |                      |                         |
| Afghanistan                             | 2.4% (0.8–5.3%)  |                              |                    | 37.1% (3.3 to 82.5%)         | 36.55 (10.2–96.71)    | 22.5% (-7.1 to 57.8%)    |                      |                         |
| Sudan                                   | 3.6% (1.2–8%)    |                              |                    | 7.2% (-16 to 41.1%)          | 48.02 (14.24–122.21)  | -1.2% (-21.5 to 25.8%)   |                      |                         |
| Alzheimer's disease and other dementias | Global           |                              |                    | Global                       | 15.1% (9.7–20.3%)     | -17.3% (-22.8 to -13%)   | 51.3 (20.5–116.23)   | -14.2% (-20.2 to -8.4%) |
|                                         |                  |                              |                    | North Africa and Middle East | 15.4% (9.9–20.7%)     | -9.8% (-16.6 to -3.1%)   | 59.52 (23.58–138.55) | -10.8% (-19.1 to 0.9%)  |
|                                         |                  |                              |                    | Algeria                      | 18.3% (12–24.6%)      | -15.3% (-26.2 to -3.8%)  | 73.48 (28.36–173.87) | -19.7% (-34.5 to -3.1%) |
|                                         |                  |                              |                    | Bahrain                      | 16.2% (9.7–22.5%)     | -13.2% (-29.5 to 6.2%)   | 65.04 (24.5–154.34)  | -16.5% (-33.8 to 6.7%)  |

**Table S15** Burden of neurological conditions attributable to risk factors in North Africa and Middle East countries

| Risk factors        | Causes                       | Locations                    | DALYs (95% UI)           |                          |                          |                          |
|---------------------|------------------------------|------------------------------|--------------------------|--------------------------|--------------------------|--------------------------|
|                     |                              |                              | PAF (%)                  | PAF change (%)           | Rate per 100,000         | Rate change (%)          |
|                     |                              |                              | 2019                     | From 1990 to 2019        | 2019                     | From 1990 to 2019        |
| Parkinson's disease |                              | Egypt                        | 21.2% (13.7–27.8%)       | 35.9% (18.8 to 56%)      | 76.64 (30.52–179.39)     | 36.1% (12 to 65.5%)      |
|                     |                              | Iran                         | 11.9% (7.4–16.7%)        | -11.1% (-24.2 to 2%)     | 45.95 (17.5–104.67)      | -11.3% (-24.8 to 7.2%)   |
|                     |                              | Iraq                         | 18.7% (12.3–25%)         | -13.4% (-26.3 to -1.8%)  | 71.81 (28.39–166.42)     | -11.6% (-27.2 to 4%)     |
|                     |                              | Jordan                       | 22.2% (14.7–29.6%)       | -16.1% (-28.4 to -3.5%)  | 81.91 (33.06–185.32)     | -19.7% (-35.1 to -3.1%)  |
|                     |                              | Kuwait                       | 18.4% (11.8–25.6%)       | -6.4% (-21 to 10.4%)     | 71.55 (28.66–161.31)     | -8.6% (-24.7 to 10.3%)   |
|                     |                              | Lebanon                      | 28.6% (18.5–37.6%)       | 22.3% (3 to 42.1%)       | 113.14 (44.96–260.28)    | 19.3% (-3.1 to 61.1%)    |
|                     |                              | Libya                        | 13% (8.3–17.5%)          | -20.8% (-31.4 to -9.4%)  | 54.03 (20–125.95)        | -24.3% (-40 to -4%)      |
|                     |                              | Morocco                      | 9.4% (5.6–13.4%)         | -25.4% (-38.9 to -13.3%) | 36.19 (13.29–88.23)      | -25.1% (-40.2 to -9.7%)  |
|                     |                              | Palestine                    | 15.6% (10.1–20.9%)       | -12.8% (-27.7 to 2.2%)   | 60.57 (23.4–143.42)      | -16.6% (-32.9 to 7%)     |
|                     |                              | Oman                         | 8.2% (4.9–11.8%)         | -18.9% (-34.6 to 1.2%)   | 34.46 (12.68–81.66)      | -21.6% (-37.8 to 3.2%)   |
|                     |                              | Qatar                        | 15% (9–21%)              | 37.9% (10.1 to 68%)      | 60.88 (22.14–145.63)     | 42.2% (4.6 to 85.2%)     |
|                     |                              | Saudi Arabia                 | 10.6% (6.3–15.5%)        | 5% (-20.1 to 34.6%)      | 41.4 (15.38–99)          | 2.7% (-25.9 to 43.7%)    |
|                     |                              | Syrian Arab Republic         | 18.5% (11.7–25.1%)       | -17.8% (-30.7 to -5.4%)  | 72.09 (27.43–168.15)     | -15.6% (-34.6 to 10%)    |
|                     |                              | Tunisia                      | 17.1% (11.6–22.7%)       | -15.8% (-26.7 to -4.5%)  | 68.77 (27.05–161.72)     | -17.5% (-34.3 to 6.7%)   |
|                     |                              | Türkiye                      | 16.2% (10.5–21.7%)       | -23.1% (-34.6 to -13.1%) | 64.14 (24.87–147.81)     | -24.6% (-37.9 to -8.4%)  |
|                     |                              | United Arab Emirates         | 15.5% (9.4–22.5%)        | 16.7% (-6.1 to 46.1%)    | 56.89 (20.99–135.49)     | 10.7% (-15.4 to 49%)     |
|                     |                              | Yemen                        | 18.1% (11.5–24.6%)       | 10.9% (-7.5 to 31%)      | 69.46 (26.81–167.49)     | 10.5% (-12.5 to 38.1%)   |
|                     |                              | Afghanistan                  | 9.2% (5.6–13.3%)         | 24.6% (-1.8 to 51.6%)    | 39.94 (13.66–101.34)     | 19.9% (-8.2 to 51.3%)    |
|                     |                              | Sudan                        | 14.8% (8.9–21.3%)        | 0.5% (-18.3 to 22.7%)    | 54.37 (20.43–131.07)     | -3.5% (-23.1 to 20.4%)   |
|                     |                              | Global                       | -10% (-15.1–-5.2%)       | -22.2% (-27.5 to -17.1%) | -8.02 (-12.33–4.11)      | -20.4% (-27.9 to -12.9%) |
|                     |                              | North Africa and Middle East | -9.1% (-13.4–-4.8%)      | -19.7% (-30 to -9.3%)    | -7.65 (-11.54–-4.01)     | -19% (-31.8 to -1.7%)    |
|                     |                              | Algeria                      | -9.1% (-13.6–-4.9%)      | -24.4% (-39.5 to -8.4%)  | -7.22 (-11.49–-3.66)     | -38% (-55.3 to -14.6%)   |
|                     |                              | Bahrain                      | -8.2% (-12.5–-4.4%)      | -28.7% (-46.2 to -5.5%)  | -7.31 (-11.81–-3.64)     | -38.3% (-57.6 to -11.6%) |
|                     |                              | Egypt                        | -10.7% (-16.1–-5.5%)     | 21.8% (-1.9 to 50.1%)    | -10.55 (-17.15–-5.12)    | 36.2% (0.6 to 80.7%)     |
|                     |                              | Iran                         | -6.4% (-9.8–-3.2%)       | -23.3% (-37.6 to -7.8%)  | -4.95 (-7.59–-2.39)      | -20.8% (-40.1 to 4.9%)   |
|                     |                              | Iraq                         | -13% (-19.8–-7%)         | -22% (-38.2 to -5%)      | -11.14 (-17.84–-5.86)    | -8.6% (-34.3 to 25.6%)   |
|                     |                              | Jordan                       | -13% (-19.7–-6.5%)       | -27.2% (-42.1 to -7.9%)  | -9.66 (-15.35–-4.7)      | -37.1% (-54.1 to -17.7%) |
|                     |                              | Kuwait                       | -10.5% (-15.4–-5.8%)     | -10.8% (-30.1 to 12.8%)  | -5.92 (-9.05–-3.05)      | -34.7% (-51.7 to -13.6%) |
|                     |                              | Lebanon                      | -17% (-25.5–-9%)         | 26.7% (0.5 to 57.3%)     | -11.82 (-19.08–-6.02)    | 8.8% (-22.7 to 55.2%)    |
|                     |                              | Libya                        | -8.3% (-12.4–-4.4%)      | -25.8% (-40.3 to -8.2%)  | -7.03 (-11.29–-3.48)     | -17.9% (-41.6 to 19.3%)  |
|                     |                              | Morocco                      | -5.2% (-8–-2.6%)         | -34.1% (-46.6 to -17.7%) | -5 (-7.8–-2.41)          | -7.9% (-33.3 to 24.8%)   |
|                     |                              | Palestine                    | -10.9% (-16.1–-5.7%)     | -17.4% (-37.6 to 6.4%)   | -10.11 (-15.79–-4.83)    | -21.6% (-45.4 to 21.8%)  |
|                     | Oman                         | -3.9% (-5.9–-2.1%)           | -30.7% (-48.5 to -6.5%)  | -4.9 (-7.63–-2.26)       | -9.3% (-41.2 to 40%)     |                          |
|                     | Qatar                        | -6.2% (-9.4–-3.2%)           | -11.5% (-34.2 to 15.1%)  | -9.14 (-15.26–-4.55)     | 1.3% (-32.7 to 50.8%)    |                          |
|                     | Saudi Arabia                 | -5.9% (-8.8–-3.2%)           | 6.3% (-23.4 to 41.6%)    | -6.55 (-10.08–-3.22)     | 7.7% (-29.9 to 74.6%)    |                          |
|                     | Syrian Arab Republic         | -10.1% (-15.7–-5.2%)         | -32% (-46.8 to -16%)     | -8.51 (-13.98–-3.93)     | -22.7% (-45.7 to 10%)    |                          |
|                     | Tunisia                      | -12.1% (-18.6–-6.1%)         | -21.5% (-37.9 to -2.7%)  | -8.79 (-14.38–-4.17)     | -12.8% (-38.8 to 22.4%)  |                          |
|                     | Türkiye                      | -10.9% (-16.6–-5.3%)         | -36.7% (-49.7 to -22.7%) | -8.21 (-13.68–-4.03)     | -41.9% (-57.4 to -21.5%) |                          |
|                     | United Arab Emirates         | -7.3% (-11.3–-3.7%)          | 13.5% (-13.9 to 47.3%)   | -9.45 (-15.95–-4.54)     | 1.8% (-31.8 to 50.1%)    |                          |
|                     | Yemen                        | -10.8% (-15.6–-5.9%)         | -7.1% (-25.1 to 18.1%)   | -8.27 (-12.97–-4.37)     | 7.2% (-23.8 to 55.5%)    |                          |
|                     | Afghanistan                  | -4.4% (-6.9–-2.3%)           | 21.8% (-7.4 to 53.8%)    | -5.04 (-8.04–-2.55)      | 14.4% (-18.8 to 57.9%)   |                          |
|                     | Sudan                        | -8.8% (-13.2–-4.8%)          | -11% (-33.9 to 16.9%)    | -7.55 (-12.17–-3.96)     | -15% (-41.1 to 31.7%)    |                          |
|                     | Global                       | 13.7% (10.4–17.2%)           | -25.6% (-30.1 to -19%)   | 1.92 (1.41–2.54)         | -35.4% (-41.4 to -28.2%) |                          |
|                     | North Africa and Middle East | 10.8% (7.8–14.5%)            | -12% (-28.2 to 5%)       | 2.15 (1.51–2.96)         | -6.7% (-28.5 to 8.8%)    |                          |
|                     | Algeria                      | 9.3% (6.6–12.1%)             | -13% (-31.7 to 11.3%)    | 1.86 (1.19–2.65)         | -1.8% (-30.6 to 27.5%)   |                          |
|                     | Bahrain                      | 10.7% (7.7–13.9%)            | -15.3% (-28 to -1.2%)    | 1.33 (0.85–1.95)         | -4.7% (-30 to 22.4%)     |                          |
|                     | Egypt                        | 10.3% (3.6–17.8%)            | 24.9% (-45.6 to 145.4%)  | 1.51 (0.82–3.25)         | 30.4% (-7 to 67.5%)      |                          |
|                     | Iran                         | 9.8% (7.2–13.5%)             | -6.6% (-22.4 to 14.2%)   | 2.89 (1.89–4.69)         | -6.3% (-34.1 to 15%)     |                          |
|                     | Iraq                         | 12.1% (8.9–16.1%)            | -18.9% (-32.4 to -2.3%)  | 1.74 (1.13–2.56)         | -8.9% (-32.6 to 16.9%)   |                          |
|                     | Jordan                       | 15.8% (12.1–19.5%)           | -3.2% (-18.5 to 16.1%)   | 3 (2.02–4.11)            | -9.9% (-29.5 to 16.2%)   |                          |
|                     | Kuwait                       | 11.2% (7.8–14.7%)            | -25.4% (-36.7 to -11.7%) | 1.94 (1.24–2.79)         | 3% (-15.4 to 26%)        |                          |
| Multiple sclerosis  |                              | Algeria                      | 9.3% (6.6–12.1%)         | -13% (-31.7 to 11.3%)    | 1.86 (1.19–2.65)         | -1.8% (-30.6 to 27.5%)   |
|                     |                              | Bahrain                      | 10.7% (7.7–13.9%)        | -15.3% (-28 to -1.2%)    | 1.33 (0.85–1.95)         | -4.7% (-30 to 22.4%)     |
|                     |                              | Egypt                        | 10.3% (3.6–17.8%)        | 24.9% (-45.6 to 145.4%)  | 1.51 (0.82–3.25)         | 30.4% (-7 to 67.5%)      |
|                     |                              | Iran                         | 9.8% (7.2–13.5%)         | -6.6% (-22.4 to 14.2%)   | 2.89 (1.89–4.69)         | -6.3% (-34.1 to 15%)     |
|                     |                              | Iraq                         | 12.1% (8.9–16.1%)        | -18.9% (-32.4 to -2.3%)  | 1.74 (1.13–2.56)         | -8.9% (-32.6 to 16.9%)   |
|                     |                              | Jordan                       | 15.8% (12.1–19.5%)       | -3.2% (-18.5 to 16.1%)   | 3 (2.02–4.11)            | -9.9% (-29.5 to 16.2%)   |
|                     |                              | Kuwait                       | 11.2% (7.8–14.7%)        | -25.4% (-36.7 to -11.7%) | 1.94 (1.24–2.79)         | 3% (-15.4 to 26%)        |

**Table S15** Burden of neurological conditions attributable to risk factors in North Africa and Middle East countries

| Risk factors | Causes | Locations            | DALYs (95% UI)     |                         |                  |                         |
|--------------|--------|----------------------|--------------------|-------------------------|------------------|-------------------------|
|              |        |                      | PAF (%)            | PAF change (%)          | Rate per 100,000 | Rate change (%)         |
|              |        |                      | 2019               | From 1990 to 2019       | 2019             | From 1990 to 2019       |
|              |        | Lebanon              | 21.4% (16.2–26.9%) | 21.7% (4.7 to 41.8%)    | 5.02 (3.35–7)    | 47% (13.9 to 92.5%)     |
|              |        | Libya                | 10.8% (7.3–14.3%)  | -9.5% (-31.6 to 13.1%)  | 2.34 (1.48–3.23) | 20.7% (-13.8 to 67%)    |
|              |        | Morocco              | 6.8% (4.9–8.8%)    | -27.9% (-40.8 to -9.7%) | 1.36 (0.87–1.89) | -9.9% (-36.8 to 23.1%)  |
|              |        | Palestine            | 13% (9.6–17.7%)    | -5.3% (-24.9 to 23.5%)  | 2.54 (1.64–3.81) | 2.9% (-34.2 to 43%)     |
|              |        | Oman                 | 7.9% (5.6–10.6%)   | -16.9% (-35.2 to 7.2%)  | 1.34 (0.82–1.93) | -0.3% (-40 to 37.9%)    |
|              |        | Qatar                | 9.8% (7–12.7%)     | 0.7% (-16.8 to 21.9%)   | 1.64 (1.03–2.38) | 34.6% (-2.4 to 80.1%)   |
|              |        | Saudi Arabia         | 8.9% (6.4–11.9%)   | 27.3% (1.9 to 61.3%)    | 1.04 (0.66–1.52) | 56.6% (9.9 to 129.6%)   |
|              |        | Syrian Arab Republic | 11.4% (8.4–14.4%)  | -19.7% (-34.7 to -3.7%) | 1.72 (1.15–2.47) | -7.3% (-31.4 to 18.8%)  |
|              |        | Tunisia              | 11.1% (8.1–14.1%)  | -11.3% (-26.6 to 11.1%) | 2.46 (1.6–3.44)  | 11.5% (-15.6 to 43.6%)  |
|              |        | Türkiye              | 15.5% (10.5–19.8%) | -14.4% (-35.8 to 19.7%) | 3.24 (2.26–4.44) | -24.4% (-44.7 to -3.9%) |
|              |        | United Arab Emirates | 11.2% (7.7–15.2%)  | -9.7% (-27.1 to 9.9%)   | 2.31 (1.23–3.95) | 7.7% (-31.6 to 58.1%)   |
|              |        | Yemen                | 14.3% (10.2–18.6%) | -7.4% (-23.3 to 13.2%)  | 1.99 (1.25–2.86) | 16.6% (-22.8 to 68%)    |
|              |        | Afghanistan          | 6.2% (3.9–9.2%)    | 62.7% (27.1 to 111.4%)  | 1.66 (0.95–2.79) | 81.4% (26.4 to 153.6%)  |
|              |        | Sudan                | 8.6% (5.6–12%)     | -12.1% (-31.4 to 18%)   | 1.2 (0.68–1.86)  | 5.8% (-31.7 to 50.8%)   |

Data in parentheses are 95% uncertainty intervals. Percentage data is rounded to one decimal place, and rate data per 100,000 is rounded to two decimal place. Percentages of DALYs are not mutually exclusive: the sum of percentages of DALYs in the columns exceeds the totals for all risk factors combined because of overlap between various risk factors. The crude sum of population attributable fraction (PAF) of the risk factors might exceed 100% because the effects of many of these risk factors are mediated partly or fully through another risk factor or risk factors. DALY=disability-adjusted life-year. PM<sub>2.5</sub>=particulate matter with a diameter of <25 µm. \*Neurological disorders in the Global Burden of Disease Study 2019 include Alzheimer's disease and other dementias, Parkinson's disease, idiopathic epilepsy, multiple sclerosis, headache disorders (including migraine and tension-type headache), motor neuron disease, and other neurological disorders. Metabolic risk factors† cluster includes high body-mass index, high fasting plasma glucose, high LDL cholesterol, high systolic blood pressure, and kidney dysfunction. ‡Behavioural risk factors cluster includes tobacco (including smoking and second-hand smoking), dietary risks (diet high in sodium, diet low in fruits, diet low in vegetables, diet high in red meat, and diet low in whole grains), low physical activity, alcohol consumption, and child and maternal malnutrition (including low birth weight and short gestation). §Environmental risk factors cluster includes air pollution (including ambient PM<sub>2.5</sub> pollution and household air pollution from solid fuels), non-optimal temperature (including low ambient temperature and high ambient temperature), and other environmental risks (including lead exposure). Risk factors with insufficient data are not reported here.

***Table S16 Regional and national disabilities and deaths related to neurological conditions attributable to risk factors in North Africa and Middle East countries***  
(NEXT PAGE)

Global (p 322), North Africa and Middle East (p 327), Algeria (p 332), Bahrain (p 337), Egypt (p 342), Iran (p 347), Iraq (p 352), Jordan (p 357), Kuwait (p 362), Lebanon (p 368), Libya (p 373), Morocco (p 378), Palestine (p 383), Oman (p 388), Qatar (p 393), Saudi Arabia (p 398), Syrian Arab Republic (p 403), Tunisia (p 409), Türkiye (p 414), United Arab Emirates (p 419), Yemen (p 424), Afghanistan (p 429), Sudan (p 434)

**Table S16** Regional and national disabilities and deaths related to neurological conditions attributable to risk factors in North Africa and Middle East countries

| Location<br>Risk factor (alphabetic order) | Cause                                   | DALYs (95% UI)     |                        |                          | Deaths (95% UI)    |                  |                           |
|--------------------------------------------|-----------------------------------------|--------------------|------------------------|--------------------------|--------------------|------------------|---------------------------|
|                                            |                                         | PAF (%)            | Rate per 100,000       | Rate change (%)          | PAF (%)            | Rate per 100,000 | Rate change (%)           |
|                                            |                                         | 2019               | 2019                   | From 1990 to 2019        | 2019               | 2019             | From 1990 to 2019         |
| <b>Global</b>                              |                                         |                    |                        |                          |                    |                  |                           |
| Air pollution                              | Meningitis                              | 2% (1.7–2.2%)      | 4.6 (3.6–6)            | -53.9% (-63.3 to -41.2%) | 1.6% (1.4–1.8%)    | 0.1 (0–0.1)      | -53.9% (-63.4 to -41.2%)  |
|                                            | Encephalitis                            | 0.6% (0.5–0.7%)    | 0.4 (0.3–0.5)          | -39.8% (-60 to -6.3%)    | 0.4% (0.3–0.5%)    | <0.1 (<0.1–<0.1) | -39.8% (-60 to -6.3%)     |
|                                            | Stroke                                  | 29.7% (27.2–32.4%) | 525.6 (463.9–589.9)    | -40.8% (-47.4 to -34.3%) | 25.1% (22.7–27.7%) | 21.1 (18.6–23.9) | -42.5% (-49.6 to -35.2%)  |
|                                            | Ischaemic stroke                        | 25.5% (23–28.1%)   | 203.4 (177.8–231.6)    | -28.6% (-37.8 to -19.2%) | 20.9% (18.7–23.4%) | 9.1 (7.9–10.4)   | -33.6% (-43.3 to -23.2%)  |
|                                            | Intracerebral haemorrhage               | 33.8% (31–36.6%)   | 281.2 (248–314.9)      | -43.2% (-50.3 to -36.4%) | 29.9% (27.2–32.8%) | 10.8 (9.5–12.1)  | -44% (-51.5 to -37%)      |
|                                            | Subarachnoid haemorrhage                | 30% (26.8–33.1%)   | 41 (33.4–49.7)         | -61.9% (-68.1 to -45.9%) | 26.9% (23.7–30%)   | 1.3 (1–1.5)      | -67.1% (-72.9 to -50.5%)  |
| Alcohol use                                | Stroke                                  | 5.8% (4.2–7.4%)    | 102.8 (72.3–133.1)     | -24.8% (-35.9 to -12.2%) | 5% (3.5–6.5%)      | 4.2 (2.9–5.6)    | -24.6% (-36.4 to -9.8%)   |
|                                            | Ischaemic stroke                        | 2.1% (0.3–3.9%)    | 16.9 (2.1–31.5)        | -9.4% (-117.7 to 163.3%) | 1.7% (0.3–4%)      | 0.7 (0–1.5)      | -13.1% (-204.6 to 200.7%) |
|                                            | Intracerebral haemorrhage               | 10.3% (7.4–13.4%)  | 85.9 (60.4–111.9)      | -27.3% (-37.5 to -15.8%) | 9.6% (6.8–12.5%)   | 3.4 (2.4–4.5)    | -26.7% (-37.3 to -15.2%)  |
|                                            | Neurological disorders*                 | 1.5% (0.8–2.5%)    | 17.2 (11.5–24)         | -7% (-16.7 to 3.9%)      | 0.7% (0.3–1.4%)    | 0.2 (0.1–0.2)    | -7.3% (-16.6 to 7.4%)     |
| All risk factors                           | Idiopathic epilepsy                     | 10.1% (7.3–13%)    | 17.2 (11.5–24)         | -7% (-16.7 to 3.9%)      | 12.6% (9.1–16%)    | 0.2 (0.1–0.2)    | -7.3% (-16.6 to 7.4%)     |
|                                            | Meningitis                              | 6.8% (6.1–7.7%)    | 15.9 (12.7–20.6)       | -52% (-61.5 to -39.2%)   | 5.4% (4.8–6.3%)    | 0.2 (0.1–0.2)    | -52% (-61.5 to -39.2%)    |
|                                            | Encephalitis                            | 2.5% (1.9–2.9%)    | 1.6 (1.2–2.1)          | -34.6% (-56 to 1.4%)     | 1.5% (1.2–1.9%)    | <0.1 (<0.1–<0.1) | -34.6% (-56 to 1.4%)      |
|                                            | Stroke                                  | 86.4% (83.4–89.2%) | 1526.7 (1408.4–1642.6) | -34.5% (-40.2 to -29.2%) | 84.3% (80.3–88.5%) | 70.9 (64.5–77.1) | -36.5% (-41.8 to -31.1%)  |
|                                            | Ischaemic stroke                        | 85% (80.2–89.9%)   | 679 (611.6–747.2)      | -28.5% (-34.9 to -22.9%) | 82.4% (75.5–89.7%) | 35.8 (31.7–40.1) | -34.1% (-39.9 to -28.5%)  |
|                                            | Intracerebral haemorrhage               | 88.1% (85.1–90.5%) | 733.6 (675.8–792)      | -35.4% (-42.5 to -29.1%) | 86.7% (82.5–90.3%) | 31.2 (28.5–34)   | -35.2% (-42.4 to -28.8%)  |
|                                            | Subarachnoid haemorrhage                | 83.6% (80.3–86.7%) | 114.1 (99.8–130.1)     | -53.3% (-60 to -36.1%)   | 83.5% (78.8–87.6%) | 3.9 (3.4–4.4)    | -57.4% (-64 to -38.8%)    |
|                                            | Neurological disorders*                 | 9.9% (4.6–18.6%)   | 122.4 (53.4–286.7)     | 6% (-2.4 to 13.6%)       | 20.7% (9.5–33.1%)  | 6.9 (1.4–20.6)   | 8.3% (-1 to 21.5%)        |
|                                            | Alzheimer's disease and other dementias | 32.8% (21.8–45.8%) | 111.3 (43.2–273.9)     | 6.9% (-2.2 to 15.2%)     | 30.7% (19.8–43.8%) | 7.1 (1.6–20.9)   | 6.8% (-2.4 to 16.2%)      |
|                                            | Parkinson's disease                     | -10% (-15.1–5.2%)  | -8 (-12.3–4.1)         | -20.4% (-27.9 to -12.9%) | -8.5% (-13–4.3%)   | -0.4 (-0.6–0.2)  | -21.1% (-29.3 to -12.7%)  |
|                                            | Idiopathic epilepsy                     | 10.1% (7.3–13%)    | 17.2 (11.5–24)         | -7% (-16.7 to 3.9%)      | 12.6% (9.1–16%)    | 0.2 (0.1–0.2)    | -7.3% (-16.6 to 7.4%)     |
|                                            | Multiple sclerosis                      | 13.7% (10.4–17.2%) | 1.9 (1.4–2.5)          | -35.4% (-41.4 to -28.2%) | 13.4% (10.1–16.9%) | <0.1 (<0.1–0.1)  | -35.4% (-45.6 to -27.1%)  |
| Ambient particulate matter pollution       | Meningitis                              | 0.5% (0.3–0.7%)    | 1.2 (0.8–1.8)          | -8.4% (-36.9 to 38.4%)   | 0.4% (0.3–0.6%)    | <0.1 (<0.1–<0.1) | -8.4% (-36.9 to 38.3%)    |
|                                            | Encephalitis                            | 0.3% (0.2–0.4%)    | 0.2 (0.1–0.3)          | 34.4% (-22.1 to 163.3%)  | 0.2% (0.1–0.2%)    | <0.1 (<0.1–<0.1) | 34.4% (-22.1 to 163.3%)   |
|                                            | Stroke                                  | 19.7% (16.4–22.5%) | 348.1 (283.3–404.4)    | 9% (-14.3 to 43.3%)      | 16.9% (14–19.4%)   | 14.3 (11.8–16.6) | 2.2% (-19.5 to 34.8%)     |
|                                            | Ischaemic stroke                        | 18.3% (15.4–20.9%) | 146.2 (119.8–171.2)    | 11.7% (-9.2 to 45.1%)    | 15.1% (12.7–17.3%) | 6.6 (5.5–7.7)    | -2% (-20.9 to 27%)        |
|                                            | Intracerebral haemorrhage               | 21% (17.1–24.3%)   | 174.8 (140.1–206)      | 14.8% (-13.4 to 58.8%)   | 19% (15.6–21.8%)   | 6.8 (5.5–8.1)    | 14.1% (-14.2 to 58.8%)    |
|                                            | Subarachnoid haemorrhage                | 19.8% (16.4–22.9%) | 27.1 (21.3–32.7)       | -25.4% (-46.6 to 10.9%)  | 18% (14.9–20.8%)   | 0.8 (0.7–1)      | -32.6% (-53.3 to 6.7%)    |
| Behavioural risk factors‡                  | Meningitis                              | 6.4% (5.7–7.3%)    | 14.9 (11.9–19.2)       | -51.4% (-61 to -38.4%)   | 5.1% (4.5–5.9%)    | 0.2 (0.1–0.2)    | -51.4% (-61 to -38.4%)    |
|                                            | Encephalitis                            | 2.3% (1.8–2.8%)    | 1.5 (1.2–2)            | -34.1% (-55.6 to 2%)     | 1.5% (1.1–1.8%)    | <0.1 (<0.1–<0.1) | -34.1% (-55.6 to 2%)      |

**Table S16** Regional and national disabilities and deaths related to neurological conditions attributable to risk factors in North Africa and Middle East countries

| Location<br>Risk factor (alphabetic order) | Cause                                   | DALYs (95% UI)     |                     |                          | Deaths (95% UI)    |                  |                          |
|--------------------------------------------|-----------------------------------------|--------------------|---------------------|--------------------------|--------------------|------------------|--------------------------|
|                                            |                                         | PAF (%)            | Rate per 100,000    | Rate change (%)          | PAF (%)            | Rate per 100,000 | Rate change (%)          |
|                                            |                                         | 2019               | 2019                | From 1990 to 2019        | 2019               | 2019             | From 1990 to 2019        |
|                                            | Stroke                                  | 46.6% (40.5–53.5%) | 823.6 (707.3–963.1) | -38.7% (-44.6 to -33.2%) | 41.2% (35.1–48.1%) | 34.7 (29–41.5)   | -40.3% (-46.1 to -34.6%) |
|                                            | Ischaemic stroke                        | 42% (34.9–49.1%)   | 335.4 (275.7–404)   | -31.1% (-38.1 to -25.2%) | 36.6% (29.5–44.1%) | 15.9 (12.6–19.8) | -36.2% (-43.2 to -30.3%) |
|                                            | Intracerebral haemorrhage               | 51.1% (44–58.9%)   | 425.2 (358.9–499.8) | -39.7% (-47 to -33.2%)   | 46.7% (39.4–54.9%) | 16.8 (13.9–20.2) | -39.7% (-47.2 to -33.2%) |
|                                            | Subarachnoid haemorrhage                | 46.1% (39.2–53.6%) | 62.9 (51.5–77.1)    | -58.6% (-65.2 to -41.2%) | 42.4% (35.1–50.8%) | 2 (1.6–2.5)      | -62.6% (-69 to -43.4%)   |
|                                            | Neurological disorders*                 | 5.1% (2.4–9.3%)    | 62.4 (29.4–130)     | -12.4% (-17.9 to -6.1%)  | 8.1% (3–13.2%)     | 2.7 (0.4–7.9)    | -14.9% (-21.3 to -4.2%)  |
|                                            | Alzheimer's disease and other dementias | 15.1% (9.7–20.3%)  | 51.3 (20.5–116.2)   | -14.2% (-20.2 to -8.4%)  | 12.6% (7.8–17.3%)  | 2.9 (0.6–8.1)    | -15.9% (-22.4 to -8.4%)  |
|                                            | Parkinson's disease                     | -10% (-15.1–5.2%)  | -8 (-12.3–4.1)      | -20.4% (-27.9 to -12.9%) | -8.5% (-13–4.3%)   | -0.4 (-0.6–0.2)  | -21.1% (-29.3 to -12.7%) |
|                                            | Idiopathic epilepsy                     | 10.1% (7.3–13%)    | 17.2 (11.5–24)      | -7% (-16.7 to 3.9%)      | 12.6% (9.1–16%)    | 0.2 (0.1–0.2)    | -7.3% (-16.6 to 7.4%)    |
|                                            | Multiple sclerosis                      | 13.7% (10.4–17.2%) | 1.9 (1.4–2.5)       | -35.4% (-41.4 to -28.2%) | 13.4% (10.1–16.9%) | <0.1 (<0.1–0.1)  | -35.4% (-45.6 to -27.1%) |
| Child and maternal malnutrition            | Meningitis                              | 6.4% (5.7–7.3%)    | 14.9 (11.9–19.2)    | -51.4% (-61 to -38.4%)   | 5.1% (4.5–5.9%)    | 0.2 (0.1–0.2)    | -51.4% (-61 to -38.4%)   |
|                                            | Encephalitis                            | 2.3% (1.8–2.8%)    | 1.5 (1.2–2)         | -34.1% (-55.6 to 2%)     | 1.5% (1.1–1.8%)    | <0.1 (<0.1–<0.1) | -34.1% (-55.6 to 2%)     |
| Diet high in red meat                      | Stroke                                  | 6.9% (4.4–9.1%)    | 122.6 (77–163.3)    | -28.5% (-36 to -17.3%)   | 5.8% (3.6–7.7%)    | 4.9 (3–6.5)      | -32.1% (-39 to -23.5%)   |
|                                            | Ischaemic stroke                        | 6.3% (3.1–8.3%)    | 50.1 (25–68.2)      | -25.6% (-32.2 to -16.9%) | 5% (2.4–6.6%)      | 2.2 (1–3)        | -35% (-41.2 to -27.9%)   |
|                                            | Intracerebral haemorrhage               | 7.3% (3.7–10.3%)   | 61.1 (30.7–87.4)    | -25.6% (-35.4 to -2.4%)  | 6.6% (3.1–9.3%)    | 2.4 (1.1–3.4)    | -24.8% (-34.7 to -2.1%)  |
|                                            | Subarachnoid haemorrhage                | 8.4% (4.3–11.9%)   | 11.4 (6.1–15.9)     | -48.1% (-56.5 to -28.7%) | 7.5% (3.8–10.6%)   | 0.3 (0.2–0.5)    | -51.2% (-60.1 to -28.8%) |
| Diet high in sodium                        | Stroke                                  | 12% (3.9–23.8%)    | 212.8 (68.4–422.7)  | -40.7% (-55.8 to -31.3%) | 10.3% (2.9–21.3%)  | 8.7 (2.5–18.1)   | -41.1% (-56.6 to -31.7%) |
|                                            | Ischaemic stroke                        | 10.4% (3.1–20.5%)  | 82.9 (24.8–168.4)   | -24.7% (-38.3 to -13%)   | 8.4% (2.2–18.3%)   | 3.7 (0.9–8)      | -29.7% (-43.8 to -18.3%) |
|                                            | Intracerebral haemorrhage               | 13.7% (4.6–27.2%)  | 114.4 (37.5–228.6)  | -43.2% (-58.3 to -33.1%) | 12.6% (3.8–25.7%)  | 4.5 (1.3–9.3)    | -42.5% (-58 to -32.1%)   |
|                                            | Subarachnoid haemorrhage                | 11.3% (3.3–23.7%)  | 15.5 (4.5–32.5)     | -67.1% (-81.3 to -48.2%) | 10.9% (2.9–23.5%)  | 0.5 (0.1–1.1)    | -69.9% (-83.4 to -49.9%) |
| Diet low in fibre                          | Stroke                                  | 3.5% (1–6.1%)      | 62.4 (18–108.3)     | -50.4% (-56.2 to -45.2%) | 2.9% (0.9–5.1%)    | 2.5 (0.7–4.3)    | -52.4% (-57.5 to -47.7%) |
|                                            | Ischaemic stroke                        | 2.9% (0.8–5.1%)    | 23.1 (6.5–40.6)     | -44.5% (-50.5 to -39.4%) | 2.5% (0.7–4.3%)    | 1.1 (0.3–1.9)    | -48.9% (-54.2 to -44%)   |
|                                            | Intracerebral haemorrhage               | 4% (1.1–6.8%)      | 33 (9.5–57.1)       | -51.6% (-58.6 to -45.8%) | 3.4% (1–5.8%)      | 1.2 (0.4–2.1)    | -52.7% (-59.5 to -46.7%) |
|                                            | Subarachnoid haemorrhage                | 4.6% (1.3–7.9%)    | 6.3 (1.7–11.3)      | -60.8% (-67.2 to -47.6%) | 4% (1.1–6.8%)      | 0.2 (0.1–0.3)    | -64.7% (-70.6 to -50.7%) |
| Diet low in fruits                         | Stroke                                  | 7.2% (4.3–10.9%)   | 127 (75.4–194.2)    | -45.1% (-52 to -38.1%)   | 5.8% (3.4–8.9%)    | 4.9 (2.8–7.6)    | -46.5% (-53.1 to -40.2%) |
|                                            | Ischaemic stroke                        | 4.4% (1.2–8.1%)    | 35.5 (10–65.5)      | -36.8% (-47.2 to -29.1%) | 3.6% (1–6.6%)      | 1.6 (0.4–2.9)    | -41.1% (-49.4 to -34.4%) |
|                                            | Intracerebral haemorrhage               | 9.4% (5–15.2%)     | 77.9 (43.1–127.9)   | -45.3% (-52.8 to -37.6%) | 8.1% (4.4–13.2%)   | 2.9 (1.6–4.9)    | -45.9% (-53.5 to -37.9%) |
|                                            | Subarachnoid haemorrhage                | 9.9% (5.6–16%)     | 13.6 (7.3–22.3)     | -58.6% (-65.2 to -44.6%) | 8.7% (4.7–14.1%)   | 0.4 (0.2–0.7)    | -63.2% (-69.6 to -48.1%) |
| Diet low in vegetables                     | Stroke                                  | 2.8% (1.1–4.6%)    | 50.2 (18.7–82.6)    | -53.3% (-57.5 to -48.5%) | 2.3% (0.9–3.7%)    | 1.9 (0.7–3.1)    | -55.7% (-59.7 to -50.7%) |
|                                            | Ischaemic stroke                        | 1.6% (0.4–2.8%)    | 12.8 (3–23.1)       | -48.5% (-52.7 to -38.6%) | 1.4% (0.3–2.5%)    | 0.6 (0.1–1.1)    | -51.4% (-55.5 to -41.4%) |
|                                            | Intracerebral haemorrhage               | 3.8% (0.9–7.1%)    | 31.7 (7.4–58.9)     | -53.7% (-59.1 to -47.9%) | 3.2% (0.8–6%)      | 1.2 (0.3–2.2)    | -56% (-61.5 to -50.4%)   |
|                                            | Subarachnoid haemorrhage                | 4.1% (0.9–7.8%)    | 5.7 (1.1–10.8)      | -60.2% (-65.8 to -47%)   | 3.6% (0.8–6.8%)    | 0.2 (0–0.3)      | -65.3% (-70.3 to -51.9%) |
| Diet low in whole grains                   | Stroke                                  | 2.3% (0.7–3.3%)    | 40.3 (12.1–58.8)    | -31.7% (-40.9 to -25.9%) | 2.2% (0.7–3.1%)    | 1.8 (0.6–2.7)    | -38.8% (-47.7 to -33.4%) |

**Table S16** Regional and national disabilities and deaths related to neurological conditions attributable to risk factors in North Africa and Middle East countries

| Location<br>Risk factor (alphabetic order) | Cause                                   | DALYs (95% UI)     |                      |                          | Deaths (95% UI)    |                  |                          |
|--------------------------------------------|-----------------------------------------|--------------------|----------------------|--------------------------|--------------------|------------------|--------------------------|
|                                            |                                         | PAF (%)            | Rate per 100,000     | Rate change (%)          | PAF (%)            | Rate per 100,000 | Rate change (%)          |
|                                            |                                         | 2019               | 2019                 | From 1990 to 2019        | 2019               | 2019             | From 1990 to 2019        |
| Dietary risks                              | Ischaemic stroke                        | 5% (1.6–7.3%)      | 40.3 (12.1–58.8)     | -31.7% (-40.9 to -25.9%) | 4.2% (1.4–6.1%)    | 1.8 (0.6–2.7)    | -38.8% (-47.7 to -33.4%) |
|                                            | Stroke                                  | 30% (22.2–39.1%)   | 531.3 (389.5–704.6)  | -40.4% (-46.8 to -34.1%) | 26% (18.8–34.9%)   | 21.9 (15.5–29.7) | -42.3% (-48.8 to -36.1%) |
|                                            | Ischaemic stroke                        | 26.7% (18.8–35.6%) | 213.2 (146.7–289)    | -31.2% (-38.6 to -24.3%) | 22.6% (15.4–31.3%) | 9.8 (6.6–14)     | -37.3% (-44.4 to -30.6%) |
|                                            | Intracerebral haemorrhage               | 32.8% (23.3–43.4%) | 273.5 (189–364.6)    | -42% (-49.7 to -34.9%)   | 29.7% (20.5–40.7%) | 10.7 (7.2–14.8)  | -42.2% (-50.4 to -34.7%) |
|                                            | Subarachnoid haemorrhage                | 32.7% (23.6–42.3%) | 44.6 (31.2–59.7)     | -59.2% (-65.9 to -43.3%) | 30% (20.7–40.2%)   | 1.4 (1–1.9)      | -63.2% (-69.6 to -45.6%) |
| Environmental/occupational risk factors§   | Meningitis                              | 2% (1.7–2.2%)      | 4.6 (3.6–6)          | -53.9% (-63.3 to -41.2%) | 1.6% (1.4–1.8%)    | 0.1 (0–0.1)      | -53.9% (-63.4 to -41.2%) |
|                                            | Encephalitis                            | 0.6% (0.5–0.7%)    | 0.4 (0.3–0.5)        | -39.8% (-60 to -6.3%)    | 0.4% (0.3–0.5%)    | <0.1 (<0.1–<0.1) | -39.8% (-60 to -6.3%)    |
|                                            | Stroke                                  | 37.3% (34.4–40.3%) | 658.9 (586.7–729.1)  | -40.6% (-46.5 to -34.5%) | 34.2% (31.4–37.3%) | 28.8 (25.5–32.1) | -41.2% (-47.5 to -35%)   |
| High body-mass index                       | Ischaemic stroke                        | 33.1% (30.3–36.2%) | 264.4 (234.1–297.3)  | -30.2% (-38.4 to -22.5%) | 30.4% (27.6–33.7%) | 13.2 (11.5–14.9) | -34.6% (-42.6 to -26.5%) |
|                                            | Intracerebral haemorrhage               | 41.3% (38.3–44.5%) | 344 (304.7–381.9)    | -42.5% (-49.7 to -35.9%) | 38.6% (35.6–41.9%) | 13.9 (12.3–15.6) | -42% (-49.5 to -35%)     |
|                                            | Subarachnoid haemorrhage                | 37% (33.4–40.5%)   | 50.5 (41.8–60)       | -61.7% (-67.8 to -45.5%) | 35.7% (32.2–39.1%) | 1.7 (1.4–2)      | -65.3% (-71.2 to -48.1%) |
|                                            | Stroke                                  | 23.6% (15.2–32.2%) | 416.6 (265.7–581.1)  | -1.1% (-16.5 to 24%)     | 15.7% (9.5–22.7%)  | 13.2 (7.9–19.3)  | -8.9% (-22.2 to 12.1%)   |
|                                            | Ischaemic stroke                        | 16.5% (10.1–23.7%) | 132.1 (80.1–195.9)   | -4.8% (-14.8 to 10.2%)   | 10.6% (5.8–16.5%)  | 4.6 (2.5–7.3)    | -18.4% (-25.9 to -7.2%)  |
|                                            | Intracerebral haemorrhage               | 28.4% (18–39%)     | 236.2 (149.3–329.4)  | 4.9% (-14.3 to 36.6%)    | 20.4% (12.4–29.7%) | 7.4 (4.4–10.8)   | 1% (-16.3 to 30.2%)      |
|                                            | Subarachnoid haemorrhage                | 35.4% (24.4–46.4%) | 48.4 (32.5–65.6)     | -15.4% (-34.3 to 15.6%)  | 26.6% (17.6–36.3%) | 1.2 (0.8–1.7)    | -20.7% (-40 to 12%)      |
| High fasting plasma glucose                | Neurological disorders*                 | 3.4% (0.9–8%)      | 42.2 (11.2–107.4)    | 30.5% (18.3 to 56.4%)    | 8.5% (2.7–17.1%)   | 2.8 (0.5–8.4)    | 26.6% (14.6 to 53%)      |
|                                            | Alzheimer's disease and other dementias | 12.5% (4.9–23.3%)  | 42.2 (11.2–107.4)    | 30.5% (18.3 to 56.4%)    | 12.2% (4.5–23%)    | 2.8 (0.5–8.4)    | 26.6% (14.6 to 53%)      |
|                                            | Stroke                                  | 20.1% (13.7–29.2%) | 355 (241.9–512.1)    | -9.8% (-17.6 to -0.5%)   | 21% (13.3–34.5%)   | 17.7 (11.3–28.8) | -13.6% (-20.9 to -4.9%)  |
|                                            | Ischaemic stroke                        | 21.8% (11.6–40.4%) | 174 (90.5–316.3)     | -4.6% (-13.2 to 5%)      | 22% (10.4–47.4%)   | 9.6 (4.6–20.8)   | -12.1% (-19.5 to -3.5%)  |
|                                            | Intracerebral haemorrhage               | 18.9% (12.1–26.9%) | 157.4 (99.9–227.2)   | -9.9% (-20.4 to 0.7%)    | 20.1% (12.3–30.9%) | 7.2 (4.4–11)     | -10.6% (-21 to -0.5%)    |
|                                            | Subarachnoid haemorrhage                | 17.3% (11.3–24.3%) | 23.6 (14.8–33.9)     | -35.7% (-45.2 to -13.8%) | 19.6% (12.7–29.2%) | 0.9 (0.6–1.4)    | -40% (-49.7 to -16.3%)   |
| High LDL cholesterol                       | Neurological disorders*                 | 2.7% (0.5–7.4%)    | 32.8 (5.5–105.9)     | 34% (28 to 47.7%)        | 6.8% (1.4–16.1%)   | 2.2 (0.3–8.2)    | 32.4% (26 to 47.9%)      |
|                                            | Alzheimer's disease and other dementias | 9.7% (2.2–20.7%)   | 32.8 (5.5–105.9)     | 34% (28 to 47.7%)        | 9.7% (2.2–20.7%)   | 2.2 (0.3–8.2)    | 32.4% (26 to 47.9%)      |
|                                            | Stroke                                  | 9.6% (5.3–16.6%)   | 170.2 (92.8–294.7)   | -31.7% (-37.3 to -23.9%) | 9.6% (3.3–20.1%)   | 8.1 (2.8–17)     | -39.2% (-44 to -32.9%)   |
| High systolic blood pressure               | Ischaemic stroke                        | 21.3% (11.7–37%)   | 170.2 (92.8–294.7)   | -31.7% (-37.3 to -23.9%) | 18.6% (6.4–38.9%)  | 8.1 (2.8–17)     | -39.2% (-44 to -32.9%)   |
|                                            | Stroke                                  | 54.8% (47.5–61.5%) | 969.4 (823.8–1110.2) | -31.7% (-37.9 to -25.5%) | 51.8% (43.6–59.6%) | 43.6 (36.2–51.1) | -34.9% (-40.9 to -28.7%) |
|                                            | Ischaemic stroke                        | 50.5% (40.3–60%)   | 403.7 (318.3–487.8)  | -28.3% (-34.4 to -22.1%) | 47.2% (36–59%)     | 20.5 (15.4–26.1) | -35% (-40.9 to -29%)     |
|                                            | Intracerebral haemorrhage               | 58.8% (49.4–67.1%) | 489.2 (406–573.5)    | -30.7% (-39.1 to -23.5%) | 56.8% (46.4–66.9%) | 20.5 (16.5–24.5) | -31.2% (-39.5 to -23.5%) |
|                                            | Subarachnoid haemorrhage                | 56% (47.4–64.4%)   | 76.4 (61–91.6)       | -49.3% (-57.2 to -31.7%) | 56% (46.2–65.3%)   | 2.6 (2–3.1)      | -53.5% (-61.2 to -35.3%) |
| High temperature                           | Stroke                                  | 0.8% (0.1–1.6%)    | 13.3 (1.4–29)        | 44.2% (-323.5 to 370.6%) | 0.7% (0.1–1.5%)    | 0.6 (0.1–1.3)    | 46.5% (-350.9 to 366.2%) |
|                                            | Ischaemic stroke                        | 0.6% (0.1–1.2%)    | 4.4 (0.7–9.5)        | 68.7% (-457.4 to 492%)   | 0.6% (0.1–1.3%)    | 0.3 (0–0.6)      | 68.2% (-514.3 to 465.4%) |



**Table S16** Regional and national disabilities and deaths related to neurological conditions attributable to risk factors in North Africa and Middle East countries

| Location<br>Risk factor (alphabetic order) | Cause                                   | DALYs (95% UI)     |                     |                          | Deaths (95% UI)    |                  |                          |
|--------------------------------------------|-----------------------------------------|--------------------|---------------------|--------------------------|--------------------|------------------|--------------------------|
|                                            |                                         | PAF (%)            | Rate per 100,000    | Rate change (%)          | PAF (%)            | Rate per 100,000 | Rate change (%)          |
|                                            |                                         | 2019               | 2019                | From 1990 to 2019        | 2019               | 2019             | From 1990 to 2019        |
| Household air pollution from solid fuels   | Intracerebral haemorrhage               | 0.9% (0–2%)        | 7.7 (0.4–17)        | 37.7% (-365.6 to 312.7%) | 0.8% (0.1–1.8%)    | 0.3 (0–0.6)      | 36.4% (-339.5 to 270.4%) |
|                                            | Subarachnoid haemorrhage                | 0.9% (0.1–1.8%)    | 1.2 (0.2–2.6)       | 16.9% (-309.8 to 351.7%) | 0.8% (0.1–1.7%)    | <0.1 (<0.1–0.1)  | 13.3% (-442 to 276.6%)   |
|                                            | Meningitis                              | 1.5% (1.2–1.7%)    | 3.4 (2.6–4.5)       | -60.8% (-69.2 to -50.2%) | 1.2% (0.9–1.4%)    | <0.1 (<0.1–0.1)  | -60.8% (-69.2 to -50.2%) |
|                                            | Encephalitis                            | 0.3% (0.2–0.4%)    | 0.2 (0.1–0.3)       | -60.1% (-74.1 to -39.3%) | 0.2% (0.1–0.3%)    | <0.1 (<0.1–<0.1) | -60.1% (-74.1 to -39.3%) |
|                                            | Stroke                                  | 10% (6.9–13.7%)    | 177.5 (122.1–242.8) | -68.8% (-76.2 to -60.7%) | 8.2% (5.6–11.3%)   | 6.9 (4.7–9.5)    | -69.8% (-77.2 to -61.5%) |
|                                            | Ischaemic stroke                        | 7.2% (4.8–10.1%)   | 57.2 (37.6–80.5)    | -62.9% (-72.4 to -52.6%) | 5.8% (3.8–8.3%)    | 2.5 (1.6–3.6)    | -63.9% (-73.3 to -53.7%) |
| Kidney dysfunction                         | Intracerebral haemorrhage               | 12.8% (9–17.2%)    | 106.4 (74.1–143.9)  | -69% (-76.2 to -61.3%)   | 11% (7.6–15%)      | 3.9 (2.7–5.4)    | -70.2% (-77.5 to -62.3%) |
|                                            | Subarachnoid haemorrhage                | 10.1% (6.8–14.1%)  | 13.9 (8.8–20.5)     | -80.5% (-85.7 to -71.1%) | 8.9% (5.8–12.6%)   | 0.4 (0.3–0.6)    | -83.8% (-88.4 to -75.1%) |
|                                            | Stroke                                  | 8.2% (6.8–9.6%)    | 145.1 (117.6–171)   | -24.5% (-31.7 to -17.9%) | 7.5% (5.6–9.2%)    | 6.3 (4.7–7.8)    | -26.7% (-33.8 to -20.1%) |
|                                            | Ischaemic stroke                        | 9% (6.7–11.3%)     | 72.2 (52.7–93.1)    | -18.8% (-26.1 to -11.9%) | 7.6% (4.6–10.4%)   | 3.3 (2–4.6)      | -25.2% (-32.3 to -18%)   |
| Lead exposure                              | Intracerebral haemorrhage               | 8.8% (7.3–10.4%)   | 72.9 (59.1–88.2)    | -29.4% (-37.3 to -22.6%) | 8.4% (6.7–10.1%)   | 3 (2.4–3.7)      | -28.2% (-36.5 to -20.8%) |
|                                            | Stroke                                  | 4.6% (2.7–6.7%)    | 82 (47.9–119.1)     | -38.5% (-45.6 to -31.2%) | 4.6% (2.8–6.6%)    | 3.8 (2.3–5.5)    | -30.5% (-38.7 to -20.9%) |
|                                            | Ischaemic stroke                        | 4% (2.3–6%)        | 32.2 (18.2–48.7)    | -13.4% (-25.7 to 0.9%)   | 3.8% (2.2–5.8%)    | 1.7 (0.9–2.6)    | -8.4% (-23 to 12.6%)     |
| Low birth weight                           | Intracerebral haemorrhage               | 5.3% (3.7–8%)      | 44 (25.1–65.7)      | -44% (-52.4 to -36.4%)   | 5.5% (3.2–8.1%)    | 2 (1.2–2.9)      | -36.2% (-45 to -27.6%)   |
|                                            | Subarachnoid haemorrhage                | 4.2% (2.1–6.6%)    | 5.7 (2.8–9.3)       | -67.3% (-74.9 to -50.2%) | 4.6% (2.6–7.1%)    | 0.2 (0.1–0.3)    | -65.9% (-73.1 to -45.1%) |
|                                            | Meningitis                              | 5.8% (5.2–6.6%)    | 13.6 (10.9–17.6)    | -52.3% (-61.7 to -39.5%) | 4.7% (4.1–5.4%)    | 0.2 (0.1–0.2)    | -52.3% (-61.7 to -39.5%) |
| Low birth weight and short gestation       | Encephalitis                            | 2.2% (1.7–2.6%)    | 1.4 (1.1–1.9)       | -34.8% (-56.2 to 1.5%)   | 1.4% (1.1–1.7%)    | <0.1 (<0.1–<0.1) | -34.8% (-56.2 to 1.5%)   |
|                                            | Meningitis                              | 6.4% (5.7–7.3%)    | 14.9 (11.9–19.2)    | -51.4% (-61 to -38.4%)   | 5.1% (4.5–5.9%)    | 0.2 (0.1–0.2)    | -51.4% (-61 to -38.4%)   |
| Low physical activity                      | Encephalitis                            | 2.3% (1.8–2.8%)    | 1.5 (1.2–2)         | -34.1% (-55.6 to 2%)     | 1.5% (1.1–1.8%)    | <0.1 (<0.1–<0.1) | -34.1% (-55.6 to 2%)     |
|                                            | Stroke                                  | 1.8% (0.3–4.7%)    | 31.2 (5.7–82)       | -28.4% (-34.3 to -19.7%) | 2.5% (0.5–6.4%)    | 2.1 (0.4–5.3)    | -32.8% (-38.3 to -23.7%) |
| Low temperature                            | Ischaemic stroke                        | 3.9% (0.7–10.4%)   | 31.2 (5.7–82)       | -28.4% (-34.3 to -19.7%) | 4.8% (1–12.3%)     | 2.1 (0.4–5.3)    | -32.8% (-38.3 to -23.7%) |
|                                            | Stroke                                  | 5.9% (4.4–7.5%)    | 103.9 (77–134.5)    | -48.7% (-54.6 to -42.7%) | 7.3% (5.6–9.3%)    | 6.2 (4.6–7.9)    | -46.6% (-51.6 to -41%)   |
|                                            | Ischaemic stroke                        | 6.1% (4.6–7.9%)    | 48.4 (36.1–63)      | -46% (-52.1 to -39.6%)   | 8% (6–10.3%)       | 3.5 (2.6–4.4)    | -45.8% (-51.1 to -39.8%) |
| Metabolic risk factors†                    | Intracerebral haemorrhage               | 5.8% (4.3–7.4%)    | 48 (34.6–61.8)      | -46.9% (-54.5 to -40%)   | 6.6% (5.1–8.4%)    | 2.4 (1.8–3)      | -43.7% (-50.8 to -36.9%) |
|                                            | Subarachnoid haemorrhage                | 5.6% (4.1–7.3%)    | 7.6 (5.5–9.8)       | -66.6% (-73.1 to -52.2%) | 7.1% (5.3–9.2%)    | 0.3 (0.2–0.4)    | -64.8% (-71.1 to -49%)   |
|                                            | Stroke                                  | 70.3% (63.8–76.5%) | 1243 (1093.2–1377)  | -29.8% (-35.7 to -23.9%) | 67.6% (59.3–75.3%) | 56.9 (48.9–64.9) | -33% (-38.6 to -27.1%)   |
|                                            | Ischaemic stroke                        | 70.4% (61.2–79.5%) | 562 (478.3–646.6)   | -26.4% (-32.6 to -20.2%) | 66.7% (54.7–79.7%) | 29 (23.4–35.2)   | -32.8% (-38.6 to -26.7%) |
|                                            | Intracerebral haemorrhage               | 70.8% (63–77.4%)   | 589.9 (517–664.5)   | -29.3% (-37.6 to -22.4%) | 68.8% (59.9–76.7%) | 24.8 (21.2–28)   | -29.8% (-38.2 to -22.5%) |
|                                            | Subarachnoid haemorrhage                | 66.8% (58.6–73.9%) | 91.1 (76–107.3)     | -47.2% (-54.9 to -29.6%) | 66.2% (57.4–74.1%) | 3.1 (2.6–3.6)    | -51.9% (-59.5 to -32.5%) |
| Non-optimal temperature                    | Neurological disorders*                 | 5.7% (1.8–12.7%)   | 70.7 (20.8–179.6)   | 30.1% (20.9 to 45.9%)    | 14.4% (5.2–26.8%)  | 4.8 (0.8–14.5)   | 27.3% (18.2 to 43.6%)    |
|                                            | Alzheimer's disease and other dementias | 20.8% (9.3–35.5%)  | 70.7 (20.8–179.6)   | 30.1% (20.9 to 45.9%)    | 20.6% (9.1–35.1%)  | 4.8 (0.8–14.5)   | 27.3% (18.2 to 43.6%)    |

**Table S16** Regional and national disabilities and deaths related to neurological conditions attributable to risk factors in North Africa and Middle East countries

| Location<br>Risk factor (alphabetic order) | Cause                                   | DALYs (95% UI)     |                     |                          | Deaths (95% UI)    |                  |                          |
|--------------------------------------------|-----------------------------------------|--------------------|---------------------|--------------------------|--------------------|------------------|--------------------------|
|                                            |                                         | PAF (%)            | Rate per 100,000    | Rate change (%)          | PAF (%)            | Rate per 100,000 | Rate change (%)          |
|                                            |                                         | 2019               | 2019                | From 1990 to 2019        | 2019               | 2019             | From 1990 to 2019        |
| Other environmental risks                  | Ischaemic stroke                        | 6.6% (5.1–8.5%)    | 52.7 (40.3–68.6)    | -42.8% (-49.6 to -34.4%) | 8.5% (6.6–11%)     | 3.7 (2.9–4.8)    | -43.1% (-49 to -35.5%)   |
|                                            | Intracerebral haemorrhage               | 6.7% (5–8.5%)      | 55.5 (41.2–71.2)    | -42.1% (-50.4 to -30.6%) | 7.4% (5.7–9.4%)    | 2.7 (2–3.4)      | -39.8% (-48 to -29.1%)   |
|                                            | Subarachnoid haemorrhage                | 6.4% (4.8–8.2%)    | 8.7 (6.6–11.3)      | -63% (-69.5 to -47.7%)   | 7.9% (6–10%)       | 0.4 (0.3–0.5)    | -62.1% (-68.4 to -45.8%) |
|                                            | Stroke                                  | 4.6% (2.7–6.7%)    | 82 (47.9–119.1)     | -38.5% (-45.6 to -31.2%) | 4.6% (2.8–6.6%)    | 3.8 (2.3–5.5)    | -30.5% (-38.7 to -20.9%) |
|                                            | Ischaemic stroke                        | 4% (2.3–6%)        | 32.2 (18.2–48.7)    | -13.4% (-25.7 to 0.9%)   | 3.8% (2.2–5.8%)    | 1.7 (0.9–2.6)    | -8.4% (-23 to 12.6%)     |
| Particulate matter pollution               | Intracerebral haemorrhage               | 5.3% (3.7–8%)      | 44 (25.1–65.7)      | -44% (-52.4 to -36.4%)   | 5.5% (3.2–8.1%)    | 2 (1.2–2.9)      | -36.2% (-45 to -27.6%)   |
|                                            | Subarachnoid haemorrhage                | 4.2% (2.1–6.6%)    | 5.7 (2.8–9.3)       | -67.3% (-74.9 to -50.2%) | 4.6% (2.6–7.1%)    | 0.2 (0.1–0.3)    | -65.9% (-73.1 to -45.1%) |
|                                            | Meningitis                              | 2% (1.7–2.2%)      | 4.6 (3.6–6)         | -53.9% (-63.3 to -41.2%) | 1.6% (1.4–1.8%)    | 0.1 (0–0.1)      | -53.9% (-63.4 to -41.2%) |
|                                            | Encephalitis                            | 0.6% (0.5–0.7%)    | 0.4 (0.3–0.5)       | -39.8% (-60 to -6.3%)    | 0.4% (0.3–0.5%)    | <0.1 (<0.1–<0.1) | -39.8% (-60 to -6.3%)    |
|                                            | Stroke                                  | 29.7% (27.2–32.4%) | 525.6 (463.9–589.9) | -40.8% (-47.4 to -34.3%) | 25.1% (22.7–27.7%) | 21.1 (18.6–23.9) | -42.5% (-49.6 to -35.2%) |
| Secondhand smoke                           | Ischaemic stroke                        | 25.5% (23–28.1%)   | 203.4 (177.8–231.6) | -28.6% (-37.8 to -19.2%) | 20.9% (18.7–23.4%) | 9.1 (7.9–10.4)   | -33.6% (-43.3 to -23.2%) |
|                                            | Intracerebral haemorrhage               | 33.8% (31–36.6%)   | 281.2 (248–314.9)   | -43.2% (-50.3 to -36.4%) | 29.9% (27.2–32.8%) | 10.8 (9.5–12.1)  | -44% (-51.5 to -37%)     |
|                                            | Subarachnoid haemorrhage                | 30% (26.8–33.1%)   | 41 (33.4–49.7)      | -61.9% (-68.1 to -45.9%) | 26.9% (23.7–30%)   | 1.3 (1–1.5)      | -67.1% (-72.9 to -50.5%) |
|                                            | Stroke                                  | 3.5% (2.6–4.4%)    | 61.5 (46–78.8)      | -41.8% (-48 to -35.1%)   | 3% (2.2–3.7%)      | 2.5 (1.9–3.2)    | -41.8% (-48.2 to -34.9%) |
|                                            | Ischaemic stroke                        | 2.9% (2.2–3.7%)    | 23.5 (17.3–30)      | -30% (-37.7 to -22.1%)   | 2.5% (1.9–3.2%)    | 1.1 (0.8–1.4)    | -32.6% (-40.5 to -24.2%) |
| Short gestation                            | Intracerebral haemorrhage               | 3.9% (2.9–4.9%)    | 32.6 (23.8–42.1)    | -43.4% (-50.8 to -36.3%) | 3.4% (2.6–4.3%)    | 1.2 (0.9–1.6)    | -43% (-50.4 to -35.2%)   |
|                                            | Subarachnoid haemorrhage                | 4% (3–5%)          | 5.4 (3.9–7.1)       | -62.7% (-68.6 to -51.8%) | 3.5% (2.7–4.4%)    | 0.2 (0.1–0.2)    | -66.7% (-72.4 to -55.1%) |
|                                            | Meningitis                              | 4.4% (3.9–5%)      | 10.3 (8.2–13.3)     | -47.6% (-57.9 to -34.1%) | 3.5% (3.1–4.1%)    | 0.1 (0.1–0.2)    | -47.6% (-57.9 to -34.2%) |
|                                            | Encephalitis                            | 1.5% (1.2–1.8%)    | 1 (0.8–1.3)         | -28.9% (-51.6 to 7.8%)   | 0.9% (0.7–1.1%)    | <0.1 (<0.1–<0.1) | -28.9% (-51.6 to 7.8%)   |
|                                            | Stroke                                  | 17.1% (15.9–18.4%) | 302.6 (270.9–337.5) | -41.6% (-47.8 to -35.4%) | 13.5% (12.5–14.6%) | 11.4 (10.2–12.6) | -42.9% (-49.4 to -36.5%) |
| Smoking                                    | Ischaemic stroke                        | 15.1% (14–16.2%)   | 120.4 (107–134.7)   | -35% (-42.7 to -29.3%)   | 11.3% (10.3–12.2%) | 4.9 (4.3–5.4)    | -39.2% (-46.9 to -33%)   |
|                                            | Intracerebral haemorrhage               | 18.8% (17.4–20.4%) | 156.9 (139–175.5)   | -41.7% (-49.7 to -34.3%) | 15.9% (14.7–17.1%) | 5.7 (5.1–6.4)    | -41.7% (-49.8 to -33.9%) |
|                                            | Subarachnoid haemorrhage                | 18.6% (17–20.3%)   | 25.3 (22.2–29.4)    | -59.9% (-67.1 to -36.8%) | 16.2% (14.8–17.9%) | 0.8 (0.7–0.9)    | -63.2% (-70.4 to -36.8%) |
|                                            | Neurological disorders*                 | 3.6% (1.2–7.9%)    | 45.2 (14.1–110.9)   | -14.3% (-20.7 to -7.7%)  | 7.4% (1.7–12.8%)   | 2.5 (0.3–7.7)    | -15.4% (-23.4 to -5.2%)  |
|                                            | Alzheimer's disease and other dementias | 15.1% (9.7–20.3%)  | 51.3 (20.5–116.2)   | -14.2% (-20.2 to -8.4%)  | 12.6% (7.8–17.3%)  | 2.9 (0.6–8.1)    | -15.9% (-22.4 to -8.4%)  |
| Tobacco                                    | Parkinson's disease                     | -10% (-15.1–-5.2%) | -8 (-12.3–-4.1)     | -20.4% (-27.9 to -12.9%) | -8.5% (-13–-4.3%)  | -0.4 (-0.6–-0.2) | -21.1% (-29.3 to -12.7%) |
|                                            | Multiple sclerosis                      | 13.7% (10.4–17.2%) | 1.9 (1.4–2.5)       | -35.4% (-41.4 to -28.2%) | 13.4% (10.1–16.9%) | <0.1 (<0.1–0.1)  | -35.4% (-45.6 to -27.1%) |
|                                            | Stroke                                  | 20% (18.6–21.4%)   | 353.9 (316–391.5)   | -41.4% (-47.4 to -35.5%) | 16% (14.9–17.3%)   | 13.5 (12.1–14.9) | -42.6% (-49 to -36.5%)   |
|                                            | Ischaemic stroke                        | 17.6% (16.4–18.7%) | 140.2 (124.5–155.9) | -34.2% (-41.7 to -28.2%) | 13.5% (12.4–14.6%) | 5.9 (5.2–6.5)    | -38.1% (-45.8 to -31.9%) |
|                                            | Intracerebral haemorrhage               | 22.1% (20.4–23.7%) | 183.9 (163.1–204.5) | -41.9% (-49.4 to -34.9%) | 18.8% (17.4–20.2%) | 6.8 (6–7.5)      | -41.8% (-49.6 to -34.7%) |
| Tobacco                                    | Subarachnoid haemorrhage                | 21.8% (20.1–23.7%) | 29.8 (26–34.2)      | -60.2% (-66.8 to -40.1%) | 19.1% (17.5–21%)   | 0.9 (0.8–1)      | -63.7% (-70.3 to -40.9%) |
|                                            | Neurological disorders*                 | 3.6% (1.2–7.9%)    | 45.2 (14.1–110.9)   | -14.3% (-20.7 to -7.7%)  | 7.4% (1.7–12.8%)   | 2.5 (0.3–7.7)    | -15.4% (-23.4 to -5.2%)  |

**Table S16** Regional and national disabilities and deaths related to neurological conditions attributable to risk factors in North Africa and Middle East countries

| Location<br>Risk factor (alphabetic order) | Cause                                   | DALYs (95% UI)      |                        |                          | Deaths (95% UI)    |                  |                            |
|--------------------------------------------|-----------------------------------------|---------------------|------------------------|--------------------------|--------------------|------------------|----------------------------|
|                                            |                                         | PAF (%)             | Rate per 100,000       | Rate change (%)          | PAF (%)            | Rate per 100,000 | Rate change (%)            |
|                                            |                                         | 2019                | 2019                   | From 1990 to 2019        | 2019               | 2019             | From 1990 to 2019          |
|                                            | Alzheimer's disease and other dementias | 15.1% (9.7–20.3%)   | 51.3 (20.5–116.2)      | -14.2% (-20.2 to -8.4%)  | 12.6% (7.8–17.3%)  | 2.9 (0.6–8.1)    | -15.9% (-22.4 to -8.4%)    |
|                                            | Parkinson's disease                     | -10% (-15.1–-5.2%)  | -8 (-12.3–-4.1)        | -20.4% (-27.9 to -12.9%) | -8.5% (-13–-4.3%)  | -0.4 (-0.6–0.2)  | -21.1% (-29.3 to -12.7%)   |
|                                            | Multiple sclerosis                      | 13.7% (10.4–17.2%)  | 1.9 (1.4–2.5)          | -35.4% (-41.4 to -28.2%) | 13.4% (10.1–16.9%) | <0.1 (<0.1–0.1)  | -35.4% (-45.6 to -27.1%)   |
| <b>North Africa and Middle East</b>        |                                         |                     |                        |                          |                    |                  |                            |
| Air pollution                              | Meningitis                              | 1.6% (1.2–2.2%)     | 1.1 (0.8–1.6)          | -78.3% (-86.3 to -65.8%) | 1% (0.7–1.4%)      | <0.1 (<0.1–<0.1) | -78.3% (-86.3 to -65.8%)   |
|                                            | Encephalitis                            | 0.8% (0.5–1.4%)     | 0.4 (0.2–0.6)          | -14.9% (-54.3 to 56.2%)  | 0.5% (0.3–0.9%)    | <0.1 (<0.1–<0.1) | -14.9% (-54.3 to 56.3%)    |
|                                            | Stroke                                  | 29.2% (26.5–32.1%)  | 533.2 (450.2–622.2)    | -33.7% (-42.6 to -21.4%) | 24.9% (22.4–27.6%) | 21.9 (18.5–25.7) | -35.4% (-44.5 to -22.1%)   |
|                                            | Ischaemic stroke                        | 28.1% (25.3–31%)    | 332.5 (281.9–387.2)    | -11.3% (-24.9 to 2.1%)   | 23.7% (21.2–26.3%) | 14.9 (12.5–17.3) | -16.3% (-30.7 to -1.7%)    |
|                                            | Intracerebral haemorrhage               | 31.6% (28.7–34.6%)  | 173.3 (142.8–209.6)    | -52.6% (-60.5 to -40.9%) | 28.2% (25.5–31.2%) | 6.1 (5.1–7.3)    | -55.8% (-63.3 to -43.8%)   |
|                                            | Subarachnoid haemorrhage                | 29.1% (25.8–32.3%)  | 27.4 (21.4–35.1)       | -56.9% (-69.5 to -31.9%) | 27.1% (24.1–30.1%) | 0.9 (0.7–1.1)    | -60.7% (-73 to -33.3%)     |
| Alcohol use                                | Stroke                                  | 0.4% (0.2–0.7%)     | 7.7 (3.2–12.3)         | -52.9% (-69.5 to -37.4%) | 0.3% (0.1–0.5%)    | 0.2 (0.1–0.4)    | -54.7% (-78.2 to -35.6%)   |
|                                            | Ischaemic stroke                        | 0% (-0.2–0.3%)      | 0.4 (-2.4–3.3)         | -52.7% (-370 to 468.5%)  | 0% (-0.2–0.2%)     | 0 (-0.1–0.1)     | 1603.3% (-412.5 to 507.5%) |
|                                            | Intracerebral haemorrhage               | 1.3% (0.8–1.9%)     | 7.3 (4.3–10.9)         | -52.9% (-63.2 to -41.1%) | 1.1% (0.6–1.6%)    | 0.2 (0.1–0.4)    | -52.7% (-63.4 to -39.7%)   |
|                                            | Neurological disorders*                 | 0.3% (0.1–0.5%)     | 3.4 (1.9–5.5)          | -17% (-44.5 to 21.7%)    | 0.1% (0–0.2%)      | <0.1 (<0.1–<0.1) | -22.4% (-46.9 to 8.5%)     |
|                                            | Idiopathic epilepsy                     | 2.1% (1.4–3.1%)     | 3.4 (1.9–5.5)          | -17% (-44.5 to 21.7%)    | 2.4% (1.6–3.4%)    | <0.1 (<0.1–<0.1) | -22.4% (-46.9 to 8.5%)     |
| All risk factors                           | Meningitis                              | 7.1% (5.4–9.4%)     | 5 (3.5–7)              | -78.5% (-85.6 to -67.8%) | 4.7% (3.5–6.3%)    | 0.1 (0–0.1)      | -78.5% (-85.6 to -67.8%)   |
|                                            | Encephalitis                            | 3.8% (2.2–6.1%)     | 1.6 (0.9–2.6)          | -15.4% (-52.1 to 49.5%)  | 2.5% (1.4–3.9%)    | <0.1 (<0.1–<0.1) | -15.4% (-52.1 to 49.5%)    |
|                                            | Stroke                                  | 85.8% (82.6–89.1%)  | 1566.9 (1393.2–1757.1) | -25.8% (-34.1 to -14%)   | 84.7% (79.9–90.3%) | 74.3 (65.5–84.4) | -24.9% (-33.5 to -11.6%)   |
|                                            | Ischaemic stroke                        | 87.1% (82.8–92%)    | 1031 (912.5–1161.6)    | -4.2% (-16.2 to 9%)      | 84.7% (78.3–92.3%) | 53.3 (46.8–61)   | -6.3% (-18.5 to 7.9%)      |
|                                            | Intracerebral haemorrhage               | 84.5% (81.1–87.7%)  | 463.3 (401–535.2)      | -47.4% (-55.4 to -35.9%) | 85.3% (80.8–89.6%) | 18.4 (16–21.1)   | -49.2% (-56.8 to -37%)     |
|                                            | Subarachnoid haemorrhage                | 77.2% (72.5–81.8%)  | 72.7 (60.5–89.5)       | -53.1% (-66.3 to -27.2%) | 81% (75.8–85.8%)   | 2.6 (2.1–3.2)    | -55.2% (-68.9 to -24.6%)   |
|                                            | Neurological disorders*                 | 11.2% (4.5–22.3%)   | 152.6 (56.5–371.9)     | 20.2% (7.5 to 39.9%)     | 25.9% (11.4–40.4%) | 9.4 (1.8–27.9)   | 21.6% (6.9 to 55%)         |
|                                            | Alzheimer's disease and other dementias | 39.9% (26.4–54.7%)  | 154.7 (58.8–375.1)     | 19% (6.7 to 37.7%)       | 37.9% (24.6–52.9%) | 9.7 (2.1–28.4)   | 19.4% (5.3 to 46.6%)       |
|                                            | Parkinson's disease                     | -9.1% (-13.4–-4.8%) | -7.6 (-11.5–-4)        | -19% (-31.8 to -1.7%)    | -8% (-11.8–-4.2%)  | -0.4 (-0.6–0.2)  | -18.9% (-33.3 to 1.1%)     |
|                                            | Idiopathic epilepsy                     | 2.1% (1.4–3.1%)     | 3.4 (1.9–5.5)          | -17% (-44.5 to 21.7%)    | 2.4% (1.6–3.4%)    | <0.1 (<0.1–<0.1) | -22.4% (-46.9 to 8.5%)     |
|                                            | Multiple sclerosis                      | 10.8% (7.8–14.5%)   | 2.2 (1.5–3)            | -6.7% (-28.5 to 8.8%)    | 11.4% (8.2–16.1%)  | <0.1 (<0.1–<0.1) | -8.8% (-42 to 18.7%)       |
| Ambient particulate matter pollution       | Meningitis                              | 0.9% (0.6–1.3%)     | 0.6 (0.4–0.9)          | -71.5% (-81.8 to -54.2%) | 0.6% (0.4–0.9%)    | <0.1 (<0.1–<0.1) | -71.5% (-81.8 to -54.2%)   |
|                                            | Encephalitis                            | 0.7% (0.2–1.3%)     | 0.3 (0.1–0.5)          | 3.5% (-48.6 to 109.4%)   | 0.4% (0.2–0.8%)    | <0.1 (<0.1–<0.1) | 3.5% (-48.6 to 109.5%)     |
|                                            | Stroke                                  | 25.5% (22.5–28.5%)  | 466.4 (391.1–553.9)    | 2.8% (-14.7 to 26.1%)    | 22% (19.3–24.6%)   | 19.3 (16.1–22.8) | 2.4% (-15.9 to 26.2%)      |
|                                            | Ischaemic stroke                        | 25% (22.1–27.9%)    | 296.5 (249.2–349.1)    | 30.6% (8.7 to 58.7%)     | 21.2% (18.5–23.8%) | 13.3 (11.2–15.8) | 26.1% (3.5 to 55.7%)       |

**Table S16** Regional and national disabilities and deaths related to neurological conditions attributable to risk factors in North Africa and Middle East countries

| Location<br>Risk factor (alphabetic order) | Cause                                   | DALYs (95% UI)     |                   |                          | Deaths (95% UI)    |                  |                          |
|--------------------------------------------|-----------------------------------------|--------------------|-------------------|--------------------------|--------------------|------------------|--------------------------|
|                                            |                                         | PAF (%)            | Rate per 100,000  | Rate change (%)          | PAF (%)            | Rate per 100,000 | Rate change (%)          |
|                                            |                                         | 2019               | 2019              | From 1990 to 2019        | 2019               | 2019             | From 1990 to 2019        |
| Behavioural risk factors‡                  | Intracerebral haemorrhage               | 26.8% (23.6–30%)   | 147 (120.3–178.4) | -23.4% (-38.7 to -3.4%)  | 24.2% (21.4–27.1%) | 5.2 (4.3–6.4)    | -26.4% (-41.3 to -6.5%)  |
|                                            | Subarachnoid haemorrhage                | 24.4% (20.8–27.7%) | 23 (18.5–28.8)    | -33.7% (-52.9 to 6.2%)   | 22.7% (19.5–25.8%) | 0.7 (0.6–0.9)    | -37.4% (-56.9 to 7.8%)   |
|                                            | Meningitis                              | 6.8% (5.2–9%)      | 4.8 (3.4–6.7)     | -78.3% (-85.5 to -67.4%) | 4.5% (3.3–6%)      | 0.1 (0–0.1)      | -78.3% (-85.5 to -67.4%) |
|                                            | Encephalitis                            | 3.7% (2.1–5.9%)    | 1.5 (0.9–2.5)     | -14.5% (-51.5 to 51.4%)  | 2.4% (1.4–3.8%)    | <0.1 (<0.1–<0.1) | -14.5% (-51.5 to 51.4%)  |
|                                            | Stroke                                  | 34% (29.6–38.9%)   | 621.8 (518–746.8) | -31.1% (-39.8 to -19.7%) | 30.7% (25.7–36.2%) | 26.9 (22–33.1)   | -30.4% (-39.5 to -17.7%) |
|                                            | Ischaemic stroke                        | 35.3% (29.2–42%)   | 418.1 (335–521.4) | -11% (-23.6 to 1.1%)     | 31.7% (25.3–38.8%) | 19.9 (15.5–25.5) | -13.2% (-25.7 to -0.3%)  |
|                                            | Intracerebral haemorrhage               | 32.1% (27.9–37.1%) | 176.3 (144–214.4) | -52.4% (-59.6 to -42.2%) | 28.3% (24.4–33.1%) | 6.1 (5–7.5)      | -54.9% (-61.8 to -44.9%) |
|                                            | Subarachnoid haemorrhage                | 29.1% (24.7–33.9%) | 27.4 (21.5–36.3)  | -56.5% (-68.5 to -33.2%) | 26.8% (22.8–31.7%) | 0.9 (0.7–1.1)    | -59.8% (-71.6 to -34.3%) |
|                                            | Neurological disorders*                 | 4.2% (1.6–8.7%)    | 57.4 (21.1–137.7) | -9.8% (-18.9 to 4%)      | 8.3% (2.6–13.8%)   | 3.1 (0.4–9.4)    | -10.7% (-23.3 to 13.7%)  |
|                                            | Alzheimer's disease and other dementias | 15.4% (9.9–20.7%)  | 59.5 (23.6–138.6) | -10.8% (-19.1 to 0.9%)   | 13.4% (8.5–18.2%)  | 3.4 (0.8–9.8)    | -11.7% (-21.8 to 5%)     |
| Parkinson's disease                        |                                         | -9.1% (-13.4–4.8%) | -7.6 (-11.5–4)    | -19% (-31.8 to -1.7%)    | -8% (-11.8–4.2%)   | -0.4 (-0.6–0.2)  | -18.9% (-33.3 to 1.1%)   |
|                                            | Idiopathic epilepsy                     | 2.1% (1.4–3.1%)    | 3.4 (1.9–5.5)     | -17% (-44.5 to 21.7%)    | 2.4% (1.6–3.4%)    | <0.1 (<0.1–<0.1) | -22.4% (-46.9 to 8.5%)   |
|                                            | Multiple sclerosis                      | 10.8% (7.8–14.5%)  | 2.2 (1.5–3)       | -6.7% (-28.5 to 8.8%)    | 11.4% (8.2–16.1%)  | <0.1 (<0.1–<0.1) | -8.8% (-42 to 18.7%)     |
|                                            | Meningitis                              | 6.8% (5.2–9%)      | 4.8 (3.4–6.7)     | -78.3% (-85.5 to -67.4%) | 4.5% (3.3–6%)      | 0.1 (0–0.1)      | -78.3% (-85.5 to -67.4%) |
| Child and maternal malnutrition            | Encephalitis                            | 3.7% (2.1–5.9%)    | 1.5 (0.9–2.5)     | -14.5% (-51.5 to 51.4%)  | 2.4% (1.4–3.8%)    | <0.1 (<0.1–<0.1) | -14.5% (-51.5 to 51.4%)  |
|                                            | Stroke                                  | 3.6% (1.4–5.5%)    | 66 (25.9–102.1)   | -30.9% (-48 to -10%)     | 2.8% (1.1–4.2%)    | 2.4 (0.9–3.8)    | -31.4% (-49.9 to -11.3%) |
| Diet high in red meat                      | Ischaemic stroke                        | 3.2% (0.6–4.9%)    | 38.3 (6.5–61.1)   | -4.6% (-18.1 to 9.4%)    | 2.4% (0.4–3.7%)    | 1.5 (0.3–2.4)    | -7.8% (-21.6 to 8.2%)    |
|                                            | Intracerebral haemorrhage               | 4.3% (0.7–6.8%)    | 23.5 (3.7–39.4)   | -49.6% (-58 to -38.1%)   | 3.7% (0.6–5.8%)    | 0.8 (0.1–1.3)    | -51.2% (-59.3 to -39.1%) |
|                                            | Subarachnoid haemorrhage                | 4.4% (0.7–7%)      | 4.1 (0.6–6.9)     | -52.3% (-65.9 to -26.6%) | 3.8% (0.6–6.1%)    | 0.1 (0–0.2)      | -55.5% (-69.2 to -25.2%) |
| Diet high in sodium                        | Stroke                                  | 1.8% (0.3–7.2%)    | 33.6 (5.8–133.3)  | -28.8% (-40.4 to -8.7%)  | 1.6% (0.3–6.2%)    | 1.4 (0.3–5.4)    | -29.4% (-42 to -7.5%)    |
|                                            | Ischaemic stroke                        | 1.7% (0.3–6.7%)    | 20.3 (3.8–80.5)   | -5.9% (-25.7 to 18.8%)   | 1.4% (0.3–5.7%)    | 0.9 (0.2–3.6)    | -8.7% (-29.3 to 16.5%)   |
|                                            | Intracerebral haemorrhage               | 2.1% (0.3–8.4%)    | 11.6 (1.7–46.7)   | -47.4% (-57.9 to -29.6%) | 1.9% (0.3–7.6%)    | 0.4 (0.1–1.7)    | -50.1% (-59.9 to -33.2%) |
|                                            | Subarachnoid haemorrhage                | 1.9% (0.3–7.4%)    | 1.8 (0.3–6.9)     | -52% (-66.6 to -18.5%)   | 1.8% (0.3–7.2%)    | 0.1 (0–0.2)      | -55.5% (-70.1 to -21%)   |
| Diet low in fibre                          | Stroke                                  | 2% (0.5–3.6%)      | 36.2 (9.2–66.7)   | -36.1% (-44 to -23.8%)   | 1.7% (0.5–3%)      | 1.5 (0.4–2.7)    | -38.8% (-46.4 to -27.2%) |
|                                            | Ischaemic stroke                        | 1.8% (0.5–3.3%)    | 21.2 (5.6–39)     | -18.2% (-28.1 to -4.8%)  | 1.5% (0.4–2.7%)    | 0.9 (0.3–1.7)    | -23% (-32.9 to -10.1%)   |
|                                            | Intracerebral haemorrhage               | 2.4% (0.6–4.3%)    | 13.1 (3.1–23.9)   | -50.5% (-58.7 to -37.9%) | 2.1% (0.5–3.7%)    | 0.4 (0.1–0.8)    | -55.2% (-62.1 to -44.4%) |
|                                            | Subarachnoid haemorrhage                | 2.1% (0.5–4%)      | 2 (0.5–4.2)       | -54.9% (-65.7 to -32.7%) | 2% (0.5–3.7%)      | 0.1 (0–0.1)      | -59.7% (-69.6 to -36%)   |
| Diet low in fruits                         | Stroke                                  | 3.9% (2.5–9%)      | 70.5 (35.4–112.5) | -47% (-58.1 to -34.3%)   | 3% (1.5–4.6%)      | 2.6 (1.3–4.2)    | -49.5% (-60.6 to -37.3%) |
|                                            | Ischaemic stroke                        | 2.9% (0.8–5.3%)    | 34.1 (9.6–63.6)   | -23.1% (-34.1 to -9.1%)  | 2.2% (0.6–4.1%)    | 1.4 (0.4–2.6)    | -28.1% (-39.5 to -14.1%) |
|                                            | Intracerebral haemorrhage               | 5.7% (2.9–9.5%)    | 31.5 (15.9–54.1)  | -58.1% (-64.9 to -48.3%) | 4.8% (2.4–8%)      | 1 (0.5–1.8)      | -61.9% (-68.2 to -52.4%) |
|                                            | Subarachnoid haemorrhage                | 5.2% (2.8–8.4%)    | 4.9 (2.4–8.7)     | -63.5% (-73.3 to -44.2%) | 4.4% (2.3–7.3%)    | 0.1 (0.1–0.3)    | -67.7% (-76.8 to -47.3%) |
| Diet low in vegetables                     | Stroke                                  | 1.7% (0.7–2.7%)    | 31.1 (13.4–50.9)  | -51.6% (-61.6 to -36.8%) | 1.4% (0.6–2.3%)    | 1.2 (0.5–2)      | -53.2% (-63.5 to -38.7%) |

**Table S16** Regional and national disabilities and deaths related to neurological conditions attributable to risk factors in North Africa and Middle East countries

| Location<br>Risk factor (alphabetic order) | Cause                                   | DALYs (95% UI)     |                     |                          | Deaths (95% UI)    |                  |                          |
|--------------------------------------------|-----------------------------------------|--------------------|---------------------|--------------------------|--------------------|------------------|--------------------------|
|                                            |                                         | PAF (%)            | Rate per 100,000    | Rate change (%)          | PAF (%)            | Rate per 100,000 | Rate change (%)          |
|                                            |                                         | 2019               | 2019                | From 1990 to 2019        | 2019               | 2019             | From 1990 to 2019        |
| Diet low in whole grains                   | Ischaemic stroke                        | 1.3% (0.3–2.3%)    | 15.4 (4–27.6)       | -31.5% (-41.6 to -11.6%) | 1.1% (0.3–2%)      | 0.7 (0.2–1.3)    | -33.7% (-44.3 to -15.4%) |
|                                            | Intracerebral haemorrhage               | 2.5% (0.7–4.8%)    | 13.6 (3.5–26.9)     | -61.9% (-69.4 to -50.7%) | 2.2% (0.6–4.3%)    | 0.5 (0.1–0.9)    | -65.8% (-72.1 to -55.9%) |
|                                            | Subarachnoid haemorrhage                | 2.2% (0.6–4.3%)    | 2.1 (0.5–4.4)       | -64.8% (-73.9 to -44.4%) | 2.1% (0.6–4.2%)    | 0.1 (0–0.1)      | -68.5% (-76.5 to -48.6%) |
|                                            | Stroke                                  | 5.3% (2.6–7%)      | 96.7 (46.5–131.4)   | -8% (-19.2 to 3.7%)      | 5.3% (2.9–6.8%)    | 4.6 (2.5–6.1)    | -9.2% (-21.3 to 3.9%)    |
|                                            | Ischaemic stroke                        | 8.2% (4–10.7%)     | 96.7 (46.5–131.4)   | -8% (-19.2 to 3.7%)      | 7.4% (4–9.5%)      | 4.6 (2.5–6.1)    | -9.2% (-21.3 to 3.9%)    |
| Dietary risks                              | Stroke                                  | 16.7% (12.6–21.5%) | 304.6 (223.3–400.8) | -33.2% (-42.5 to -21.5%) | 14.6% (11–18.8%)   | 12.8 (9.4–16.9)  | -33.4% (-42.6 to -21.5%) |
|                                            | Ischaemic stroke                        | 17.4% (12.1–22.4%) | 206.1 (140.3–270.9) | -12.5% (-23.8 to -0.8%)  | 15% (10.7–19.2%)   | 9.5 (6.5–12.5)   | -15.1% (-27.3 to -2.1%)  |
|                                            | Intracerebral haemorrhage               | 15.5% (10.1–21.3%) | 84.9 (54.4–121)     | -54.6% (-62.1 to -44.9%) | 13.6% (8.8–19%)    | 2.9 (1.9–4.2)    | -57.9% (-65.2 to -48.1%) |
|                                            | Subarachnoid haemorrhage                | 14.3% (9.2–19.9%)  | 13.5 (8.3–20.3)     | -58.8% (-70.3 to -36.6%) | 13.1% (8.3–18.3%)  | 0.4 (0.2–0.6)    | -62.7% (-73.3 to -40.1%) |
| Environmental/occupational risk factors§   | Meningitis                              | 1.6% (1.2–2.2%)    | 1.1 (0.8–1.6)       | -78.3% (-86.3 to -65.8%) | 1% (0.7–1.4%)      | <0.1 (<0.1–<0.1) | -78.3% (-86.3 to -65.8%) |
|                                            | Encephalitis                            | 0.8% (0.5–1.4%)    | 0.4 (0.2–0.6)       | -14.9% (-54.3 to 56.2%)  | 0.5% (0.3–0.9%)    | <0.1 (<0.1–<0.1) | -14.9% (-54.3 to 56.3%)  |
|                                            | Stroke                                  | 37.5% (34.5–40.7%) | 685 (590.6–792.8)   | -33.5% (-41.7 to -22.2%) | 34.7% (31.8–37.9%) | 30.5 (26.1–35.2) | -32.5% (-40.8 to -19.1%) |
|                                            | Ischaemic stroke                        | 36.4% (33.4–39.7%) | 430.7 (370.7–494.6) | -10.9% (-24 to 2.5%)     | 33.5% (30.5–36.7%) | 21.1 (18.1–24.4) | -13% (-26.6 to 1.8%)     |
| High body-mass index                       | Intracerebral haemorrhage               | 40% (36.9–43.3%)   | 219.4 (184.6–260.2) | -52.7% (-60.4 to -41.9%) | 37.9% (34.9–41.3%) | 8.2 (6.9–9.7)    | -54.4% (-61.8 to -42.9%) |
|                                            | Subarachnoid haemorrhage                | 37.1% (33.5–40.8%) | 35 (27.8–44.8)      | -58.2% (-69.6 to -33.8%) | 37% (33.5–40.3%)   | 1.2 (0.9–1.5)    | -59.6% (-71.7 to -31.9%) |
|                                            | Stroke                                  | 33.8% (24.3–42.8%) | 618 (440.1–822.7)   | -6.2% (-21.8 to 16.6%)   | 22.8% (15.1–30.7%) | 20 (13.3–28.2)   | -5.1% (-21.8 to 19.4%)   |
|                                            | Ischaemic stroke                        | 27.3% (18.8–36%)   | 323.4 (218.8–443.9) | 37.1% (13.1 to 68.5%)    | 17.9% (11.2–25.8%) | 11.2 (6.9–16.6)  | 35.1% (9.5 to 70.8%)     |
|                                            | Intracerebral haemorrhage               | 46% (34.5–56.7%)   | 252.2 (182.5–329.8) | -28.8% (-42.6 to -7.3%)  | 35.2% (25.2–46.3%) | 7.6 (5.3–10.5)   | -29.8% (-44.3 to -7.1%)  |
|                                            | Subarachnoid haemorrhage                | 45.1% (34–55.2%)   | 42.4 (30.6–56.2)    | -38.1% (-55.5 to -5%)    | 35.1% (24.9–46.3%) | 1.1 (0.8–1.5)    | -40.6% (-59.4 to -2%)    |
|                                            | Neurological disorders*                 | 5.3% (1.6–11.9%)   | 72.6 (21–181.2)     | 48.7% (28.5 to 94.4%)    | 12.9% (4.7–24.2%)  | 4.6 (0.8–13.6)   | 47% (23.7 to 100.5%)     |
| High fasting plasma glucose                | Alzheimer's disease and other dementias | 18.7% (8.2–33.1%)  | 72.6 (21–181.2)     | 48.7% (28.5 to 94.4%)    | 18% (7.8–32%)      | 4.6 (0.8–13.6)   | 47% (23.7 to 100.5%)     |
|                                            | Stroke                                  | 27.6% (17.7–42.8%) | 504.9 (318.8–793.9) | 34.8% (7.9 to 64.8%)     | 29.1% (16.6–52.4%) | 25.5 (14.8–45.2) | 30.3% (2.9 to 59.5%)     |
|                                            | Ischaemic stroke                        | 29.9% (15.7–53%)   | 353.8 (190.4–627.5) | 67.7% (38.9 to 103.2%)   | 30% (14.5–62.3%)   | 18.8 (8.9–38.8)  | 57.7% (29.6 to 92.4%)    |
|                                            | Intracerebral haemorrhage               | 24.2% (15.6–33.9%) | 132.5 (81.9–191)    | -5.9% (-23.4 to 18.3%)   | 27.2% (16.9–40.9%) | 5.9 (3.6–9)      | -11.1% (-28.1 to 12.3%)  |
|                                            | Subarachnoid haemorrhage                | 19.8% (12.9–28.3%) | 18.6 (11.4–27.2)    | -18.1% (-41.7 to 32.6%)  | 25% (15.4–38.6%)   | 0.8 (0.5–1.3)    | -22.1% (-46 to 35.4%)    |
|                                            | Neurological disorders*                 | 3.5% (0.6–9.7%)    | 48.3 (8.7–151.5)    | 59.1% (47.1 to 88.7%)    | 8.9% (1.9–19.9%)   | 3.2 (0.4–11.4)   | 55.9% (41.5 to 94.6%)    |
| High LDL cholesterol                       | Alzheimer's disease and other dementias | 12.4% (3–25.9%)    | 48.3 (8.7–151.5)    | 59.1% (47.1 to 88.7%)    | 12.3% (3–25.7%)    | 3.2 (0.4–11.4)   | 55.9% (41.5 to 94.6%)    |
|                                            | Stroke                                  | 15% (9.1–24.8%)    | 274.7 (160.6–448.1) | -0.9% (-14 to 13.7%)     | 13.9% (5.5–28.2%)  | 12.2 (4.7–25.1)  | -4.7% (-18.3 to 10.5%)   |
|                                            | Ischaemic stroke                        | 23.2% (13.9–38.2%) | 274.7 (160.6–448.1) | -0.9% (-14 to 13.7%)     | 19.4% (7.6–38.8%)  | 12.2 (4.7–25.1)  | -4.7% (-18.3 to 10.5%)   |
| High systolic blood pressure               | Stroke                                  | 52.8% (45.7–59.4%) | 965 (800.6–1143.2)  | -24.9% (-34.3 to -12%)   | 50.1% (41.6–58.5%) | 44 (35.1–53.5)   | -25.2% (-35.3 to -10.7%) |
|                                            | Ischaemic stroke                        | 51.3% (41.6–60.2%) | 607.8 (477.7–734.5) | -1.1% (-13.7 to 13.3%)   | 47.6% (37–58.6%)   | 30 (22.2–38.6)   | -4.5% (-17.5 to 11.3%)   |

**Table S16** Regional and national disabilities and deaths related to neurological conditions attributable to risk factors in North Africa and Middle East countries

| Location<br>Risk factor (alphabetic order) | Cause                     | DALYs (95% UI)     |                      |                          | Deaths (95% UI)    |                  |                          |
|--------------------------------------------|---------------------------|--------------------|----------------------|--------------------------|--------------------|------------------|--------------------------|
|                                            |                           | PAF (%)            | Rate per 100,000     | Rate change (%)          | PAF (%)            | Rate per 100,000 | Rate change (%)          |
|                                            |                           | 2019               | 2019                 | From 1990 to 2019        | 2019               | 2019             | From 1990 to 2019        |
| High temperature                           | Intracerebral haemorrhage | 56.4% (47.4–64.3%) | 309.1 (247.8–378)    | -45.9% (-54.5 to -33.5%) | 56.7% (46.1–66.5%) | 12.2 (9.5–15.1)  | -48% (-55.8 to -34.9%)   |
|                                            | Subarachnoid haemorrhage  | 51.1% (42.6–59.1%) | 48.1 (37.3–61.4)     | -51.5% (-65.5 to -23.8%) | 54.2% (43.8–63.4%) | 1.7 (1.3–2.3)    | -54.4% (-68.7 to -22.2%) |
|                                            | Stroke                    | 1.6% (0.5–3.1%)    | 29.4 (10.2–59.3)     | -21.2% (-59.9 to 33.6%)  | 1.7% (0.6–3.3%)    | 1.5 (0.5–2.9)    | -16.8% (-52.5 to 47.8%)  |
|                                            | Ischaemic stroke          | 1.5% (0.5–3%)      | 17.9 (6.1–36.2)      | 11.1% (-39.8 to 103.6%)  | 1.7% (0.6–3.2%)    | 1.1 (0.4–2.1)    | 8.4% (-39.3 to 97.2%)    |
| Household air pollution from solid fuels   | Intracerebral haemorrhage | 1.8% (0.6–3.6%)    | 10 (3.5–20.3)        | -43.2% (-71.3 to -8.4%)  | 1.7% (0.6–3.4%)    | 0.4 (0.1–0.8)    | -45.9% (-71.2 to -6.3%)  |
|                                            | Subarachnoid haemorrhage  | 1.5% (0.6–3%)      | 1.5 (0.5–3.1)        | -58.5% (-83.3 to -17.7%) | 1.5% (0.6–3%)      | <0.1 (<0.1–0.1)  | -55.6% (-80.6 to -13.8%) |
|                                            | Meningitis                | 0.7% (0.4–1.1%)    | 0.5 (0.3–0.8)        | -83.5% (-91.5 to -68.6%) | 0.4% (0.2–0.7%)    | <0.1 (<0.1–<0.1) | -83.5% (-91.5 to -68.6%) |
|                                            | Encephalitis              | 0.2% (0.1–0.3%)    | 0.1 (0–0.2)          | -51.1% (-78 to 26.9%)    | 0.1% (0–0.2%)      | <0.1 (<0.1–<0.1) | -51.1% (-78 to 26.9%)    |
| Kidney dysfunction                         | Stroke                    | 3.7% (2.5–5%)      | 66.8 (44.8–93.1)     | -80.9% (-84.8 to -76.1%) | 3% (2.4–2.2%)      | 2.6 (1.7–3.7)    | -82.7% (-86 to -78.6%)   |
|                                            | Ischaemic stroke          | 3% (2.1–4.3%)      | 36.1 (24.1–52.9)     | -75.6% (-80.2 to -69.8%) | 2.5% (1.7–3.7%)    | 1.6 (1–2.4)      | -78.2% (-82.3 to -72.7%) |
|                                            | Intracerebral haemorrhage | 4.8% (3.3–6.5%)    | 26.4 (17.6–37.1)     | -84.9% (-88.3 to -80.3%) | 4% (2.7–5.6%)      | 0.9 (0.6–1.2)    | -87% (-89.9 to -83.3%)   |
|                                            | Subarachnoid haemorrhage  | 4.6% (2.5–7.1%)    | 4.4 (2.1–7.5)        | -84.7% (-88.8 to -77.9%) | 4.4% (2.2–7.1%)    | 0.1 (0.1–0.3)    | -86.3% (-89.7 to -80.2%) |
| Lead exposure                              | Stroke                    | 11% (8.7–13.3%)    | 200.8 (155.6–247.9)  | 3.2% (-12.2 to 21.1%)    | 10.6% (7–13.8%)    | 9.3 (6.2–12.2)   | 3% (-15.8 to 24.8%)      |
|                                            | Ischaemic stroke          | 12.5% (9.2–15.7%)  | 148.5 (107.9–190)    | 26.7% (6 to 45.3%)       | 10.9% (6.2–15.1%)  | 6.9 (4–9.7)      | 23.4% (-1.5 to 45.2%)    |
|                                            | Intracerebral haemorrhage | 9.5% (7.8–11.5%)   | 52.3 (41–64.9)       | -32.4% (-42.9 to -15.8%) | 11.2% (8.6–13.9%)  | 2.4 (1.8–3.1)    | -29.8% (-41.2 to -11.5%) |
|                                            | Stroke                    | 5.2% (3.3–7.3%)    | 95.5 (57.8–137.7)    | -40.8% (-50.5 to -30.4%) | 5.3% (3.4–7.4%)    | 4.6 (2.9–6.7)    | -33% (-44 to -20.6%)     |
| Low birth weight                           | Ischaemic stroke          | 5.2% (3.2–7.4%)    | 61.3 (36.2–89)       | -15.2% (-28.5 to -3.3%)  | 5.1% (3.1–7.4%)    | 3.2 (1.9–4.7)    | -7.7% (-21.8 to 6.6%)    |
|                                            | Intracerebral haemorrhage | 5.4% (3.2–8%)      | 29.9 (17.2–44.8)     | -60.9% (-68.6 to -52.2%) | 5.8% (3.5–8.5%)    | 1.3 (0.7–1.8)    | -57.9% (-65.3 to -48.3%) |
|                                            | Subarachnoid haemorrhage  | 4.6% (2.5–7.1%)    | 4.4 (2.1–7.3)        | -64.8% (-74.1 to -46.8%) | 5.6% (3.1–8.3%)    | 0.2 (0.1–0.3)    | -61.3% (-71.9 to -37.9%) |
|                                            | Meningitis                | 6.5% (4.9–8.6%)    | 4.5 (3.2–6.4)        | -78.3% (-85.6 to -67.5%) | 4.3% (3.1–5.7%)    | 0.1 (0–0.1)      | -78.3% (-85.6 to -67.5%) |
| Low birth weight and short gestation       | Encephalitis              | 3.5% (2.5–6%)      | 1.4 (0.9–2.4)        | -15.1% (-52.3 to 50.9%)  | 2.2% (1.3–3.6%)    | <0.1 (<0.1–<0.1) | -15.1% (-52.3 to 50.9%)  |
|                                            | Meningitis                | 6.8% (5.2–9%)      | 4.8 (3.4–6.7)        | -78.3% (-85.5 to -67.4%) | 4.5% (3.3–6%)      | 0.1 (0–0.1)      | -78.3% (-85.5 to -67.4%) |
| Low physical activity                      | Encephalitis              | 3.7% (2.1–5.9%)    | 1.5 (0.9–2.5)        | -14.5% (-51.5 to 51.4%)  | 2.4% (1.4–3.8%)    | <0.1 (<0.1–<0.1) | -14.5% (-51.5 to 51.4%)  |
|                                            | Stroke                    | 5% (1.1–11.2%)     | 91.7 (18.8–203.4)    | 1.2% (-11.8 to 16%)      | 6.4% (1.5–13.2%)   | 5.6 (1.3–11.6)   | -3.2% (-15.8 to 12.7%)   |
| Low temperature                            | Ischaemic stroke          | 7.7% (1.7–17.2%)   | 91.7 (18.8–203.4)    | 1.2% (-11.8 to 16%)      | 8.9% (2.1–18.3%)   | 5.6 (1.3–11.6)   | -3.2% (-15.8 to 12.7%)   |
|                                            | Stroke                    | 5.5% (3.5–7.7%)    | 100.9 (62–140.7)     | -34.4% (-43.8 to -23.6%) | 6.7% (4.5–9.1%)    | 5.9 (3.8–8)      | -26.5% (-36.4 to -12.8%) |
|                                            | Ischaemic stroke          | 5.3% (3.4–7.5%)    | 63.1 (39.4–87.8)     | -13.4% (-28.1 to 0.3%)   | 6.7% (4.5–9.1%)    | 4.2 (2.7–5.7)    | -9.9% (-24 to 5.6%)      |
|                                            | Intracerebral haemorrhage | 5.9% (3.6–8.3%)    | 32.1 (19.1–45.9)     | -51.5% (-59.1 to -41.7%) | 6.7% (4.4–9%)      | 1.4 (0.9–2)      | -48.8% (-56.7 to -37.3%) |
| Metabolic risk factors†                    | Subarachnoid haemorrhage  | 6% (4.8–3%)        | 5.6 (3.5–8)          | -61.6% (-72 to -35%)     | 7.2% (5.1–9.4%)    | 0.2 (0.2–0.3)    | -55.9% (-70 to -22.2%)   |
|                                            | Stroke                    | 73.9% (67.6–80.1%) | 1349.7 (1156–1552.3) | -19.6% (-29.1 to -6.3%)  | 71.4% (62.5–81.2%) | 62.6 (52.7–74.3) | -19.2% (-29.3 to -4.8%)  |
|                                            | Ischaemic stroke          | 75.1% (66.7–84.3%) | 888.8 (753.9–1040.5) | 2.8% (-11.2 to 18%)      | 70.9% (59.5–84.6%) | 44.6 (36.3–54.7) | 0.4% (-14 to 17.5%)      |
|                                            | Intracerebral haemorrhage | 72.9% (66–78.6%)   | 399.9 (339.2–470.1)  | -42.6% (-51.5 to -29.4%) | 73.4% (65.4–80.7%) | 15.8 (13.2–18.6) | -44.6% (-53.2 to -30.9%) |
|                                            | Subarachnoid haemorrhage  | 64.7% (57.3–71.4%) | 60.9 (49–76.6)       | -48.4% (-63.2 to -19.4%) | 67.6% (58.8–75.7%) | 2.1 (1.7–2.7)    | -51.4% (-66.6 to -17.8%) |



**Table S16** Regional and national disabilities and deaths related to neurological conditions attributable to risk factors in North Africa and Middle East countries

| Location<br>Risk factor (alphabetic order) | Cause                                   | DALYs (95% UI)     |                     |                          | Deaths (95% UI)    |                  |                          |
|--------------------------------------------|-----------------------------------------|--------------------|---------------------|--------------------------|--------------------|------------------|--------------------------|
|                                            |                                         | PAF (%)            | Rate per 100,000    | Rate change (%)          | PAF (%)            | Rate per 100,000 | Rate change (%)          |
|                                            |                                         | 2019               | 2019                | From 1990 to 2019        | 2019               | 2019             | From 1990 to 2019        |
|                                            | Neurological disorders*                 | 8.2% (2.8–17.4%)   | 111.7 (34.2–279.7)  | 48.4% (31.4 to 80.4%)    | 20.2% (8.1–34.5%)  | 7.2 (1.3–21.7)   | 46.4% (27.5 to 85.8%)    |
|                                            | Alzheimer's disease and other dementias | 28.8% (14.7–45.8%) | 111.7 (34.2–279.7)  | 48.4% (31.4 to 80.4%)    | 28.1% (14.2–44.9%) | 7.2 (1.3–21.7)   | 46.4% (27.5 to 85.8%)    |
| Non-optimal temperature                    | Stroke                                  | 7.1% (5.9–9.1%)    | 129.1 (90–168.5)    | -31.9% (-44.4 to -17.3%) | 8.3% (6.1–10.5%)   | 7.3 (5.2–9.3)    | -24.8% (-38.2 to -8%)    |
|                                            | Ischaemic stroke                        | 6.8% (4.8–8.8%)    | 80.3 (56.2–104.7)   | -9.2% (-28 to 9.5%)      | 8.3% (6.1–10.5%)   | 5.2 (3.8–6.7)    | -6.8% (-24.1 to 12.1%)   |
|                                            | Intracerebral haemorrhage               | 7.6% (5.3–9.8%)    | 41.7 (28.7–55.6)    | -49.8% (-59 to -36.9%)   | 8.4% (6–10.5%)     | 1.8 (1.3–2.3)    | -48.2% (-57.5 to -33.6%) |
|                                            | Subarachnoid haemorrhage                | 7.5% (5.4–9.6%)    | 7 (4.9–9.7)         | -61% (-71.5 to -33.3%)   | 8.6% (6.5–10.7%)   | 0.3 (0.2–0.4)    | -55.9% (-69.7 to -21.7%) |
| Other environmental risks                  | Stroke                                  | 5.2% (3.3–7.3%)    | 95.5 (57.8–137.7)   | -40.8% (-50.5 to -30.4%) | 5.3% (3.4–7.4%)    | 4.6 (2.9–6.7)    | -33% (-44 to -20.6%)     |
|                                            | Ischaemic stroke                        | 5.2% (3.2–7.4%)    | 61.3 (36.2–89)      | -15.2% (-28.5 to -3.3%)  | 5.1% (3.1–7.4%)    | 3.2 (1.9–4.7)    | -7.7% (-21.8 to 6.6%)    |
|                                            | Intracerebral haemorrhage               | 5.4% (3.2–8%)      | 29.9 (17.2–44.8)    | -60.9% (-68.6 to -52.2%) | 5.8% (3.5–8.5%)    | 1.3 (0.7–1.8)    | -57.9% (-65.3 to -48.3%) |
|                                            | Subarachnoid haemorrhage                | 4.6% (2.5–7.1%)    | 4.4 (2.1–7.3)       | -64.8% (-74.1 to -46.8%) | 5.6% (3.1–8.3%)    | 0.2 (0.1–0.3)    | -61.3% (-71.9 to -37.9%) |
| Particulate matter pollution               | Meningitis                              | 1.6% (1.2–2.2%)    | 1.1 (0.8–1.6)       | -78.3% (-86.3 to -65.8%) | 1% (0.7–1.4%)      | <0.1 (<0.1–<0.1) | -78.3% (-86.3 to -65.8%) |
|                                            | Encephalitis                            | 0.8% (0.5–1.4%)    | 0.4 (0.2–0.6)       | -14.9% (-54.3 to 56.2%)  | 0.5% (0.3–0.9%)    | <0.1 (<0.1–<0.1) | -14.9% (-54.3 to 56.3%)  |
|                                            | Stroke                                  | 29.2% (26.5–32.1%) | 533.2 (450.2–622.2) | -33.7% (-42.6 to -21.4%) | 24.9% (22.4–27.6%) | 21.9 (18.5–25.7) | -35.4% (-44.5 to -22.1%) |
|                                            | Ischaemic stroke                        | 28.1% (25.3–31%)   | 332.5 (281.9–387.2) | -11.3% (-24.9 to 2.1%)   | 23.7% (21.2–26.3%) | 14.9 (12.5–17.3) | -16.3% (-30.7 to -1.7%)  |
|                                            | Intracerebral haemorrhage               | 31.6% (28.7–34.6%) | 173.3 (142.8–209.6) | -52.6% (-60.5 to -40.9%) | 28.2% (25.5–31.2%) | 6.1 (5.1–7.3)    | -55.8% (-63.3 to -43.8%) |
|                                            | Subarachnoid haemorrhage                | 29.1% (25.8–32.3%) | 27.4 (21.4–35.1)    | -56.9% (-69.5 to -31.9%) | 27.1% (24.1–30.1%) | 0.9 (0.7–1.1)    | -60.7% (-73 to -33.3%)   |
| Secondhand smoke                           | Stroke                                  | 3.9% (3.4–9%)      | 71.9 (53.5–91.9)    | -35.7% (-43.7 to -24.8%) | 3.4% (2.5–4.2%)    | 3 (2.2–3.8)      | -35.7% (-43.9 to -24.5%) |
|                                            | Ischaemic stroke                        | 3.6% (2.7–4.5%)    | 42.9 (31.6–54.7)    | -13.2% (-26 to -0.1%)    | 3.1% (2.3–4%)      | 2 (1.5–2.5)      | -17.3% (-30 to -3.6%)    |
|                                            | Intracerebral haemorrhage               | 4.5% (3.4–5.7%)    | 24.9 (18.1–32.3)    | -52.6% (-60.2 to -41.9%) | 4% (3–5%)          | 0.9 (0.6–1.1)    | -54.5% (-61.4 to -43.7%) |
|                                            | Subarachnoid haemorrhage                | 4.4% (3.3–5.6%)    | 4.1 (2.9–5.6)       | -58.5% (-70.5 to -35.3%) | 4% (3.1–5%)        | 0.1 (0.1–0.2)    | -60.6% (-72.7 to -35.4%) |
| Short gestation                            | Meningitis                              | 4.8% (3.6–6.3%)    | 3.4 (2.4–4.7)       | -75.3% (-83.4 to -62.9%) | 3.2% (2.3–4.3%)    | <0.1 (<0.1–0.1)  | -75.3% (-83.4 to -62.9%) |
|                                            | Encephalitis                            | 2.7% (1.5–4.4%)    | 1.1 (0.6–1.8)       | -2.9% (-45.9 to 69.7%)   | 1.7% (1.2–8%)      | <0.1 (<0.1–<0.1) | -2.9% (-45.9 to 69.7%)   |
| Smoking                                    | Stroke                                  | 13.5% (12.5–14.5%) | 246 (214.2–280.1)   | -34.9% (-44.3 to -23.8%) | 10.3% (9.4–11.2%)  | 9 (7.8–10.3)     | -35.8% (-45.8 to -23.9%) |
|                                            | Ischaemic stroke                        | 12.4% (11.5–13.4%) | 147 (128.6–166.4)   | -16% (-32.2 to -2.9%)    | 9.1% (8.3–10%)     | 5.7 (5–6.5)      | -18.8% (-36.4 to -4.5%)  |
|                                            | Intracerebral haemorrhage               | 15.6% (14.3–16.9%) | 85.5 (72.4–100)     | -50.7% (-59.1 to -40.5%) | 13.3% (12.1–14.5%) | 2.9 (2.4–3.4)    | -52.5% (-60.6 to -42%)   |
|                                            | Subarachnoid haemorrhage                | 14.2% (12.7–16%)   | 13.4 (11.2–17.2)    | -54.1% (-67.6 to -26.6%) | 12.8% (11.5–14.6%) | 0.4 (0.3–0.5)    | -56.8% (-70.4 to -27.7%) |
|                                            | Neurological disorders*                 | 3.9% (1.4–8.5%)    | 54 (17.8–133.9)     | -9.3% (-18.6 to 5.1%)    | 8.2% (2.4–13.8%)   | 3.1 (0.4–9.4)    | -10.5% (-23.3 to 13.2%)  |
|                                            | Alzheimer's disease and other dementias | 15.4% (9.9–20.7%)  | 59.5 (23.6–138.6)   | -10.8% (-19.1 to 0.9%)   | 13.4% (8.5–18.2%)  | 3.4 (0.8–9.8)    | -11.7% (-21.8 to 5%)     |
|                                            | Parkinson's disease                     | -9.1% (-13.4–4.8%) | -7.6 (-11.5–4)      | -19% (-31.8 to -1.7%)    | -8% (-11.8–4.2%)   | -0.4 (-0.6–0.2)  | -18.9% (-33.3 to 1.1%)   |
|                                            | Multiple sclerosis                      | 10.8% (7.8–14.5%)  | 2.2 (1.5–3)         | -6.7% (-28.5 to 8.8%)    | 11.4% (8.2–16.1%)  | <0.1 (<0.1–<0.1) | -8.8% (-42 to 18.7%)     |
| Tobacco                                    | Stroke                                  | 16.9% (15.6–18.1%) | 307.8 (267.1–351)   | -34.8% (-44 to -23.9%)   | 13.2% (12.1–14.4%) | 11.6 (10.1–13.2) | -35.6% (-45.1 to -23.9%) |



**Table S16** Regional and national disabilities and deaths related to neurological conditions attributable to risk factors in North Africa and Middle East countries

| Location<br>Risk factor (alphabetic order) | Cause                                   | DALYs (95% UI)     |                        |                           | Deaths (95% UI)        |                   |                           |
|--------------------------------------------|-----------------------------------------|--------------------|------------------------|---------------------------|------------------------|-------------------|---------------------------|
|                                            |                                         | PAF (%)            | Rate per 100,000       | Rate change (%)           | PAF (%)                | Rate per 100,000  | Rate change (%)           |
|                                            |                                         | 2019               | 2019                   | From 1990 to 2019         | 2019                   | 2019              | From 1990 to 2019         |
|                                            | Ischaemic stroke                        | 15.6% (14.4–16.8%) | 184.4 (161–210)        | -15.1% (-31.8 to -2.3%)   | 11.9% (10.8–13.1%)     | 7.5 (6.4–8.6)     | -18.2% (-35.1 to -4.5%)   |
|                                            | Intracerebral haemorrhage               | 19.4% (17.9–21%)   | 106.5 (90.3–125.1)     | -51% (-58.9 to -40.7%)    | 16.7% (15.3–18.2%)     | 3.6 (3.1–4.2)     | -52.8% (-60.5 to -42.6%)  |
|                                            | Subarachnoid haemorrhage                | 18% (16.1–20.1%)   | 16.9 (14.1–21.4)       | -55% (-67.9 to -29.2%)    | 16.3% (14.7–18.1%)     | 0.5 (0.4–0.7)     | -57.7% (-70.5 to -29.2%)  |
|                                            | Neurological disorders*                 | 3.9% (1.4–8.5%)    | 54 (17.8–133.9)        | -9.3% (-18.6 to 5.1%)     | 8.2% (2.4–13.8%)       | 3.1 (0.4–9.4)     | -10.5% (-23.3 to 13.2%)   |
|                                            | Alzheimer's disease and other dementias | 15.4% (9.9–20.7%)  | 59.5 (23.6–138.6)      | -10.8% (-19.1 to 0.9%)    | 13.4% (8.5–18.2%)      | 3.4 (0.8–9.8)     | -11.7% (-21.8 to 5%)      |
|                                            | Parkinson's disease                     | -9.1% (-13.4–4.8%) | -7.6 (-11.5–4)         | -19% (-31.8 to -1.7%)     | -8% (-11.8–4.2%)       | -0.4 (-0.6–0.2)   | -18.9% (-33.3 to 1.1%)    |
|                                            | Multiple sclerosis                      | 10.8% (7.8–14.5%)  | 2.2 (1.5–3)            | -6.7% (-28.5 to 8.8%)     | 11.4% (8.2–16.1%)      | <0.1 (<0.1–<0.1)  | -8.8% (-42 to 18.7%)      |
| <b>Algeria</b>                             |                                         |                    |                        |                           |                        |                   |                           |
| Air pollution                              | Meningitis                              | 0.8% (0.3–1.5%)    | 0.3 (0.1–0.6)          | -78% (-94 to -3.9%)       | 0.4% (0.1–0.8%)        | <0.1 (<0.1–<0.1)  | -78% (-94 to -3.9%)       |
|                                            | Encephalitis                            | 0.4% (0.1–1%)      | 0.1 (0–0.2)            | 6% (-74.1 to 359.5%)      | 0.3% (0.1–0.6%)        | <0.1 (<0.1–<0.1)  | 6% (-74.1 to 359.5%)      |
|                                            | Stroke                                  | 23.4% (17–29.3%)   | 410.3 (278.6–551.2)    | -44.6% (-56.3 to -31%)    | 19.2% (13.7–24.5%)     | 19.5 (12.9–26.8)  | -44.9% (-56.7 to -30.6%)  |
|                                            | Ischaemic stroke                        | 22.2% (16–28.2%)   | 283.8 (194–385.1)      | -22.1% (-37.7 to -2.7%)   | 18.4% (13–23.5%)       | 14.8 (9.7–20.2)   | -27.5% (-43.2 to -8.3%)   |
|                                            | Intracerebral haemorrhage               | 26.2% (19.3–32.5%) | 105.8 (72.3–150.1)     | -67.1% (-75.5 to -56.2%)  | 22.1% (16–27.9%)       | 4.1 (2.7–5.8)     | -68.9% (-76.7 to -58.7%)  |
|                                            | Subarachnoid haemorrhage                | 27% (19.9–33.8%)   | 20.7 (13.4–29.5)       | -62.1% (-73.7 to -39.9%)  | 23.5% (17–29.5%)       | 0.7 (0.4–1)       | -64.4% (-76.1 to -42.1%)  |
| Alcohol use                                | Stroke                                  | 0.4% (0–0.7%)      | 6.7 (0.4–13.2)         | -5.7% (-163.2 to 363.6%)  | 0.2% (-0.1–0.4%)       | 0.2 (-0.1–0.4)    | -5.8% (-398.5 to 832.9%)  |
|                                            | Ischaemic stroke                        | 0% (-0.3–0.3%)     | -0.1 (-4.1–4.1)        | -97.1% (-765.3 to 811.9%) | -0.1% (-0.3–0.2%)      | -0.1 (-0.3–0.1)   | -59.3% (-493.2 to 176.6%) |
|                                            | Intracerebral haemorrhage               | 1.7% (0.8–2.7%)    | 6.8 (3.1–11.3)         | -27.6% (-55.9 to 46.2%)   | 1.2% (0.5–1.9%)        | 0.2 (0.1–0.4)     | -31.7% (-61.4 to 43.5%)   |
|                                            | Neurological disorders*                 | 0.3% (0.1–0.6%)    | 3.6 (1.5–6.7)          | 25.7% (-45 to 174.2%)     | 0.1% (0–0.2%)          | <0.1 (<0.1–<0.1)  | 6.7% (-31.7 to 86.5%)     |
|                                            | Idiopathic epilepsy                     | 2.5% (1.4–3.6%)    | 3.6 (1.5–6.7)          | 25.7% (-45 to 174.2%)     | 2.7% (1.6–4%)          | <0.1 (<0.1–<0.1)  | 6.7% (-31.7 to 86.5%)     |
|                                            | All risk factors                        | Meningitis         | 4.3% (2.6–6.6%)        | 1.7 (1–2.9)               | -81.8% (-91 to -62.4%) | 2.2% (1.3–3.6%)   | <0.1 (<0.1–<0.1)          |
|                                            | Encephalitis                            | 2.5% (1.2–4.5%)    | 0.5 (0.2–0.8)          | -12.7% (-64.2 to 112.4%)  | 1.5% (0.7–2.7%)        | <0.1 (<0.1–<0.1)  | -12.7% (-64.2 to 112.4%)  |
|                                            | Stroke                                  | 85.7% (81.2–90.5%) | 1503.9 (1242.7–1802.3) | -42.7% (-54.3 to -29.1%)  | 83.6% (77–91.2%)       | 84.8 (68.6–104.3) | -42% (-54 to -28%)        |
|                                            | Ischaemic stroke                        | 86% (80.3–92.4%)   | 1096.3 (899.9–1331.5)  | -22.4% (-37.7 to -4.6%)   | 83.4% (75.3–92.9%)     | 66.9 (53.2–83.9)  | -25.9% (-41.6 to -7.1%)   |
|                                            | Intracerebral haemorrhage               | 85.3% (81.1–89%)   | 344.4 (270.1–433.7)    | -67.1% (-75.1 to -56.3%)  | 84.3% (78–89.8%)       | 15.6 (11.9–20.1)  | -68.5% (-76.2 to -58.5%)  |
|                                            | Subarachnoid haemorrhage                | 82.2% (77.6–86.3%) | 63.2 (46.9–83.9)       | -62.2% (-73.8 to -41%)    | 82.5% (76.2–88%)       | 2.4 (1.7–3.1)     | -63.7% (-75.6 to -42.5%)  |
|                                            | Neurological disorders*                 | 12.8% (5.1–25.4%)  | 172.6 (63.3–427.5)     | 16.1% (-2.1 to 40.5%)     | 29.9% (14.2–45.6%)     | 11.1 (2.2–33.6)   | 15% (-5.5 to 57.3%)       |
|                                            | Alzheimer's disease and other dementias | 43.4% (29.2–58.9%) | 174.4 (65.8–428.7)     | 12.1% (-6 to 34.5%)       | 42.6% (28.5–57.8%)     | 11.5 (2.5–34.2)   | 10.9% (-10.5 to 37.1%)    |
|                                            | Parkinson's disease                     | -9.1% (-13.6–4.9%) | -7.2 (-11.5–3.7)       | -38% (-55.3 to -14.6%)    | -8.7% (-13–4.6%)       | -0.5 (-0.8–0.2)   | -39.9% (-57.7 to -14.3%)  |
|                                            | Idiopathic epilepsy                     | 2.5% (1.4–3.6%)    | 3.6 (1.5–6.7)          | 25.7% (-45 to 174.2%)     | 2.7% (1.6–4%)          | <0.1 (<0.1–<0.1)  | 6.7% (-31.7 to 86.5%)     |
|                                            | Multiple sclerosis                      | 9.3% (6.6–12.1%)   | 1.9 (1.2–2.6)          | -1.8% (-30.6 to 27.5%)    | 10.5% (7.3–14.1%)      | <0.1 (<0.1–<0.1)  | -14.5% (-53.2 to 30.4%)   |
| Ambient particulate matter pollution       | Meningitis                              | 0.8% (0.3–1.5%)    | 0.3 (0.1–0.6)          | -70.5% (-92 to 35.1%)     | 0.4% (0.1–0.8%)        | <0.1 (<0.1–<0.1)  | -70.5% (-92 to 35.1%)     |

**Table S16** Regional and national disabilities and deaths related to neurological conditions attributable to risk factors in North Africa and Middle East countries

| Location<br>Risk factor (alphabetic order) | Cause                                   | DALYs (95% UI)     |                        |                          | Deaths (95% UI)    |                         |                          |
|--------------------------------------------|-----------------------------------------|--------------------|------------------------|--------------------------|--------------------|-------------------------|--------------------------|
|                                            |                                         | PAF (%)            | Rate per 100,000       | Rate change (%)          | PAF (%)            | Rate per 100,000        | Rate change (%)          |
|                                            |                                         | 2019               | 2019                   | From 1990 to 2019        | 2019               | 2019                    | From 1990 to 2019        |
| Behavioural risk factors‡                  | Encephalitis                            | 0.4% (0.1–1%)      | 0.1 (0–0.2)            | 42% (-65.9 to 545.2%)    | 0.3% (0.1–0.6%)    | <0.1 (<0.1–<0.1)        | 42% (-65.9 to 545.6%)    |
|                                            | Stroke                                  | 23.3% (16.9–29.3%) | 409 (278–550.1)        | -29.3% (-46 to -3.6%)    | 19.2% (13.6–24.4%) | 19.5 (12.8–26.7)        | -29.8% (-46.9 to -4.9%)  |
|                                            | Ischaemic stroke                        | 22.2% (16–28.1%)   | 282.9 (192.9–384.2)    | -0.7% (-24.5 to 35%)     | 18.3% (13–23.5%)   | 14.7 (9.7–20.2)         | -7.8% (-31.1 to 24.2%)   |
|                                            | Intracerebral haemorrhage               | 26.1% (19.3–32.4%) | 105.5 (72–149.5)       | -58% (-70 to -40.2%)     | 22.1% (16–27.8%)   | 4.1 (2.7–5.8)           | -60.3% (-71.5 to -43.4%) |
|                                            | Subarachnoid haemorrhage                | 26.9% (19.9–33.7%) | 20.7 (13.4–29.5)       | -51.3% (-67.3 to -21%)   | 23.4% (16.9–29.4%) | 0.7 (0.4–0.9)           | -54.5% (-70.2 to -24.6%) |
|                                            | Meningitis                              | 4% (2.4–6.3%)      | 1.6 (0.9–2.7)          | -81.7% (-91.1 to -62.8%) | 2.1% (1.2–3.4%)    | <0.1 (<0.1–<0.1)        | -81.7% (-91.1 to -62.8%) |
|                                            | Encephalitis                            | 2.3% (1.1–4.3%)    | 0.4 (0.2–0.8)          | -12.2% (-64.5 to 112.1%) | 1.4% (0.7–2.6%)    | <0.1 (<0.1–<0.1)        | -12.2% (-64.5 to 112.1%) |
|                                            | Stroke                                  | 34.1% (28.8–39.9%) | 598.2 (464.3–757.4)    | -49.4% (-60 to -35.9%)   | 31.2% (25.1–37.8%) | 31.6 (23.8–41)          | -48.2% (-59.3 to -34.9%) |
|                                            | Ischaemic stroke                        | 35.2% (28.6–42.6%) | 449.5 (335.6–583.6)    | -30.4% (-44.7 to -13.4%) | 32.3% (25.1–40.4%) | 25.9 (18.6–34.4)        | -33.6% (-48 to -16.6%)   |
|                                            | Intracerebral haemorrhage               | 31% (25.8–36.9%)   | 125.3 (91.2–166.2)     | -72.9% (-80.3 to -63.4%) | 26.8% (22–32.4%)   | 5 (3.6–6.7)             | -74.5% (-81.2 to -65.6%) |
|                                            | Subarachnoid haemorrhage                | 30.4% (24.8–36.5%) | 23.4 (16–33.3)         | -68.6% (-79.1 to -50.1%) | 27.4% (22.2–33.3%) | 0.8 (0.5–1.1)           | -70.4% (-80.6 to -51.4%) |
|                                            | Neurological disorders*                 | 5.3% (2–10.8%)     | 71.7 (25.4–174.2)      | -15.2% (-30.6 to 5.6%)   | 11.8% (4.3–18.9%)  | 4.5 (0.6–13.9)          | -18.3% (-36.8 to 18.9%)  |
|                                            | Alzheimer's disease and other dementias | 18.3% (12–24.6%)   | 73.5 (28.4–173.9)      | -19.7% (-34.5 to -3.1%)  | 18.2% (11.7–24.7%) | 4.9 (1.1–14.2)          | -21.2% (-38.2 to 0.7%)   |
|                                            | Parkinson's disease                     | -9.1% (-13.6–4.9%) | -7.2 (-11.5–3.7)       | -38% (-55.3 to -14.6%)   | -8.7% (-13–4.6%)   | -0.5 (-0.8–0.2)         | -39.9% (-57.7 to -14.3%) |
| Idiopathic epilepsy                        | 2.5% (1.4–3.6%)                         | 3.6 (1.5–6.7)      | 25.7% (-45 to 174.2%)  | 2.7% (1.6–4%)            | <0.1 (<0.1–<0.1)   | 6.7% (-31.7 to 86.5%)   |                          |
| Multiple sclerosis                         | 9.3% (6.6–12.1%)                        | 1.9 (1.2–2.6)      | -1.8% (-30.6 to 27.5%) | 10.5% (7.3–14.1%)        | <0.1 (<0.1–<0.1)   | -14.5% (-53.2 to 30.4%) |                          |
| Child and maternal malnutrition            | Meningitis                              | 4% (2.4–6.3%)      | 1.6 (0.9–2.7)          | -81.7% (-91.1 to -62.8%) | 2.1% (1.2–3.4%)    | <0.1 (<0.1–<0.1)        | -81.7% (-91.1 to -62.8%) |
| Diet high in red meat                      | Encephalitis                            | 2.3% (1.1–4.3%)    | 0.4 (0.2–0.8)          | -12.2% (-64.5 to 112.1%) | 1.4% (0.7–2.6%)    | <0.1 (<0.1–<0.1)        | -12.2% (-64.5 to 112.1%) |
|                                            | Stroke                                  | 3.4% (1.2–5.2%)    | 59 (20.7–94.5)         | -36.7% (-58.3 to -4.1%)  | 2.5% (0.8–3.9%)    | 2.5 (0.8–4.2)           | -36.8% (-59.1 to -6.5%)  |
|                                            | Ischaemic stroke                        | 3% (0.4–4.7%)      | 37.9 (5.6–65.2)        | -4.9% (-24.9 to 25.9%)   | 2.2% (0.4–3.6%)    | 1.8 (0.3–3.1)           | -11.2% (-31 to 21.1%)    |
| Diet high in sodium                        | Intracerebral haemorrhage               | 4.3% (0.6–7%)      | 17.5 (2.4–31.4)        | -61.4% (-71.9 to -44.9%) | 3.5% (0.5–5.7%)    | 0.6 (0.1–1.2)           | -63% (-73 to -47.4%)     |
|                                            | Subarachnoid haemorrhage                | 4.6% (0.6–7.5%)    | 3.5 (0.4–6.4)          | -55.6% (-69.2 to -24.9%) | 3.7% (0.5–6.1%)    | 0.1 (0–0.2)             | -58.1% (-71.9 to -29.9%) |
|                                            | Stroke                                  | 1.7% (0.3–6.8%)    | 30.4 (4.5–118.2)       | -46.2% (-66.4 to -5.1%)  | 1.4% (0.3–5.6%)    | 1.4 (0.3–5.5)           | -46.7% (-66.9 to 2.5%)   |
|                                            | Ischaemic stroke                        | 1.6% (0.3–6.3%)    | 20.4 (3.2–79.2)        | -23.2% (-54.1 to 35.9%)  | 1.3% (0.3–5%)      | 1 (0.2–4.1)             | -28% (-57.7 to 35.9%)    |
|                                            | Intracerebral haemorrhage               | 2.1% (0.3–8.4%)    | 8.4 (1–34.7)           | -67.4% (-81.2 to -40.2%) | 1.8% (0.3–7.1%)    | 0.3 (0–1.4)             | -69.2% (-81.8 to -41.8%) |
| Diet low in fibre                          | Subarachnoid haemorrhage                | 2.1% (0.2–8.2%)    | 1.6 (0.2–6.4)          | -61.4% (-79.9 to -19.8%) | 1.9% (0.3–7.6%)    | 0.1 (0–0.2)             | -63.6% (-80.6 to -20.8%) |
|                                            | Stroke                                  | 1.5% (0.4–3.2%)    | 26 (6–57)              | -78.9% (-85.5 to -69.6%) | 1.4% (0.3–2.9%)    | 1.4 (0.4–3)             | -76.7% (-84.4 to -65.8%) |
|                                            | Ischaemic stroke                        | 1.4% (0.3–3%)      | 18.1 (4.3–38.9)        | -69.5% (-79.4 to -56.2%) | 1.3% (0.3–2.8%)    | 1.1 (0.3–2.3)           | -68.2% (-79.3 to -52.9%) |
| Diet low in fruits                         | Intracerebral haemorrhage               | 1.6% (0.4–3.6%)    | 6.6 (1.4–14.9)         | -88% (-92 to -82.3%)     | 1.5% (0.4–3.3%)    | 0.3 (0.1–0.6)           | -87.7% (-91.9 to -81.8%) |
|                                            | Subarachnoid haemorrhage                | 1.7% (0.4–3.8%)    | 1.3 (0.3–3.1)          | -85.9% (-91.6 to -76.5%) | 1.6% (0.4–3.3%)    | <0.1 (<0.1–0.1)         | -86.2% (-91.7 to -76.1%) |
|                                            | Stroke                                  | 3.9% (1.7–6.3%)    | 68.4 (29.3–117.9)      | -67.3% (-80.6 to -50.8%) | 3.2% (1.3–5.4%)    | 3.2 (1.3–5.7)           | -65.4% (-79.4 to -49.4%) |
|                                            | Ischaemic stroke                        | 3.1% (0.7–6%)      | 39.9 (8.1–81.1)        | -49.3% (-75.5 to -23.2%) | 2.7% (0.6–5.1%)    | 2.1 (0.5–4.3)           | -48.9% (-72.3 to -26%)   |

**Table S16** Regional and national disabilities and deaths related to neurological conditions attributable to risk factors in North Africa and Middle East countries

| Location<br>Risk factor (alphabetic order) | Cause                                   | DALYs (95% UI)     |                     |                          | Deaths (95% UI)    |                  |                          |
|--------------------------------------------|-----------------------------------------|--------------------|---------------------|--------------------------|--------------------|------------------|--------------------------|
|                                            |                                         | PAF (%)            | Rate per 100,000    | Rate change (%)          | PAF (%)            | Rate per 100,000 | Rate change (%)          |
|                                            |                                         | 2019               | 2019                | From 1990 to 2019        | 2019               | 2019             | From 1990 to 2019        |
| Diet low in vegetables                     | Intracerebral haemorrhage               | 5.9% (2.7–10.4%)   | 23.7 (10.5–42.6)    | -78.7% (-88.2 to -67.8%) | 5.1% (2.4–9.3%)    | 1 (0.4–1.7)      | -79% (-88.1 to -68.8%)   |
|                                            | Subarachnoid haemorrhage                | 6.2% (2.8–11%)     | 4.8 (2.1–8.8)       | -75% (-87.1 to -56.7%)   | 5.3% (2.5–9.3%)    | 0.2 (0.1–0.3)    | -76.4% (-87.8 to -58.3%) |
|                                            | Stroke                                  | 2.1% (0.6–3.7%)    | 36.1 (10.5–67.8)    | -70.6% (-86.5 to -47.4%) | 1.8% (0.6–3.2%)    | 1.8 (0.6–3.4)    | -68.4% (-84.5 to -48%)   |
|                                            | Ischaemic stroke                        | 1.8% (0.2–3.5%)    | 23.5 (3–46.3)       | -48.3% (-75.5 to -18.6%) | 1.6% (0.2–3%)      | 1.3 (0.2–2.6)    | -49.1% (-74.1 to -23.2%) |
| Diet low in whole grains                   | Intracerebral haemorrhage               | 2.6% (0.2–6.9%)    | 10.6 (0.9–28.1)     | -84.1% (-94.4 to -68.6%) | 2.5% (0.2–6.3%)    | 0.5 (0–1.2)      | -83.7% (-93.3 to -70%)   |
|                                            | Subarachnoid haemorrhage                | 2.6% (0.2–7%)      | 2 (0.2–5.5)         | -81.7% (-94.4 to -60.5%) | 2.5% (0.2–6.4%)    | 0.1 (0–0.2)      | -81.6% (-93.5 to -61.5%) |
|                                            | Stroke                                  | 5.8% (2.8–7.7%)    | 101.6 (49–145.7)    | -24.4% (-40.6 to -6.4%)  | 5.5% (2.8–7.2%)    | 5.6 (2.8–7.8)    | -29.3% (-45.5 to -11%)   |
|                                            | Ischaemic stroke                        | 8% (3.9–10.5%)     | 101.6 (49–145.7)    | -24.4% (-40.6 to -6.4%)  | 6.9% (3.6–9.1%)    | 5.6 (2.8–7.8)    | -29.3% (-45.5 to -11%)   |
| Dietary risks                              | Stroke                                  | 16.9% (12.5–21.7%) | 295.8 (206.7–406.8) | -55.4% (-66.2 to -42%)   | 14.8% (11–19%)     | 15 (10.4–20.5)   | -54.3% (-65.6 to -41.5%) |
|                                            | Ischaemic stroke                        | 17.4% (11.9–22.5%) | 221.5 (144.2–303.2) | -35.8% (-50.6 to -18.9%) | 15.1% (10.6–19.6%) | 12.1 (8–16.6)    | -38.8% (-53.7 to -21.2%) |
|                                            | Intracerebral haemorrhage               | 15.4% (9.3–22%)    | 62.1 (35.5–93.6)    | -77.2% (-84.6 to -67.4%) | 13.7% (8.5–19.8%)  | 2.5 (1.4–3.8)    | -78% (-84.7 to -69.1%)   |
| Environmental/occupational risk factors§   | Subarachnoid haemorrhage                | 15.9% (9.7–23%)    | 12.3 (6.9–19.4)     | -73.4% (-83.7 to -57.5%) | 14.1% (8.6–20.5%)  | 0.4 (0.2–0.6)    | -74.9% (-84.8 to -58.8%) |
|                                            | Meningitis                              | 0.8% (0.3–1.5%)    | 0.3 (0.1–0.6)       | -78% (-94 to -3.9%)      | 0.4% (0.1–0.8%)    | <0.1 (<0.1–<0.1) | -78% (-94 to -3.9%)      |
|                                            | Encephalitis                            | 0.4% (0.1–1%)      | 0.1 (0–0.2)         | 6% (-74.1 to 359.5%)     | 0.3% (0.1–0.6%)    | <0.1 (<0.1–<0.1) | 6% (-74.1 to 359.5%)     |
|                                            | Stroke                                  | 30.8% (24.7–36.6%) | 540.9 (400.9–699.4) | -45.5% (-56.7 to -31.7%) | 28% (22.5–33.6%)   | 28.4 (21.1–37)   | -44% (-55.9 to -30%)     |
| High body-mass index                       | Ischaemic stroke                        | 29.7% (23.8–35.5%) | 378.6 (280.5–494.3) | -23.4% (-39.1 to -4.1%)  | 27.2% (21.8–32.7%) | 21.8 (16.1–28.5) | -26.8% (-42.7 to -7.3%)  |
|                                            | Intracerebral haemorrhage               | 33.7% (27.3–40.1%) | 136.2 (98.5–180)    | -68% (-76 to -57.3%)     | 30.9% (24.9–36.8%) | 5.7 (4.2–7.6)    | -69% (-76.8 to -58.8%)   |
|                                            | Subarachnoid haemorrhage                | 33.9% (27.5–40.6%) | 26.1 (17.9–35.8)    | -63.7% (-74.9 to -41.9%) | 32% (25.9–38.1%)   | 0.9 (0.6–1.3)    | -64.6% (-76.3 to -42.6%) |
|                                            | Stroke                                  | 30.8% (21.7–39.8%) | 541.6 (362.1–750.9) | -28.6% (-45.9 to -4.3%)  | 18.2% (11.4–26.2%) | 18.5 (11–28)     | -25.7% (-45.1 to 2.9%)   |
|                                            | Ischaemic stroke                        | 24.8% (16.5–33.7%) | 316.1 (194.7–460.9) | 22% (-7.2 to 66.1%)      | 14.7% (8.4–22.7%)  | 11.8 (6.4–19.1)  | 20.1% (-13 to 72.7%)     |
|                                            | Intracerebral haemorrhage               | 46.3% (34.3–57.4%) | 186.9 (127.5–257.3) | -55.5% (-67.8 to -36.9%) | 30.9% (20.6–42.1%) | 5.7 (3.6–8.6)    | -55.7% (-68.3 to -36.8%) |
|                                            | Subarachnoid haemorrhage                | 50.2% (38–61.4%)   | 38.6 (25.8–56.1)    | -51.5% (-66.9 to -23.2%) | 35.5% (24.7–47.1%) | 1 (0.6–1.5)      | -53.6% (-69.5 to -23%)   |
|                                            | Neurological disorders*                 | 5.5% (1.6–12.6%)   | 74.4 (19.8–183.3)   | 59.8% (26.6 to 143.2%)   | 12.9% (4.6–24.3%)  | 4.7 (0.7–14.2)   | 64% (24.9 to 169.9%)     |
| High fasting plasma glucose                | Alzheimer's disease and other dementias | 18.5% (8–32.9%)    | 74.4 (19.8–183.3)   | 59.8% (26.6 to 143.2%)   | 17.5% (7.3–31.5%)  | 4.7 (0.7–14.2)   | 64% (24.9 to 169.9%)     |
|                                            | Stroke                                  | 30.6% (18.6–51.1%) | 536.7 (315.2–918.5) | 5.9% (-25.1 to 46.9%)    | 31% (16.5–61.7%)   | 31.5 (16.3–62.5) | 3.2% (-29.5 to 43.2%)    |
|                                            | Ischaemic stroke                        | 32.1% (17–60.5%)   | 408.8 (207.4–775.8) | 37.7% (-0.4 to 92%)      | 31.5% (14.3–69.9%) | 25.2 (11.1–55.6) | 27.7% (-9.9 to 78.8%)    |
|                                            | Intracerebral haemorrhage               | 27% (17.5–38.9%)   | 109.2 (64.2–169.6)  | -40% (-57.8 to -12.6%)   | 29.2% (17.9–47.7%) | 5.4 (3–9.1)      | -43% (-61 to -17.7%)     |
|                                            | Subarachnoid haemorrhage                | 24.3% (15.8–34.9%) | 18.7 (10.7–28.9)    | -32.9% (-56.4 to 9.5%)   | 28.7% (17.9–45.2%) | 0.8 (0.5–1.4)    | -33.8% (-58.1 to 11.5%)  |
|                                            | Neurological disorders*                 | 4.3% (0.7–11.9%)   | 58.3 (10.6–189.1)   | 56.6% (34.7 to 91.6%)    | 10.7% (2.3–23.8%)  | 3.9 (0.5–14.7)   | 53.1% (28.9 to 93.4%)    |
| High LDL cholesterol                       | Alzheimer's disease and other dementias | 14.5% (3.6–29.8%)  | 58.3 (10.6–189.1)   | 56.6% (34.7 to 91.6%)    | 14.6% (3.6–29.7%)  | 3.9 (0.5–14.7)   | 53.1% (28.9 to 93.4%)    |
|                                            | Stroke                                  | 15.5% (8.3–26.8%)  | 272 (137.7–493.8)   | -16.8% (-32.6 to 5.3%)   | 14.2% (4.5–31.1%)  | 14.4 (4.5–33.7)  | -22.2% (-37.6 to -0.2%)  |

**Table S16** Regional and national disabilities and deaths related to neurological conditions attributable to risk factors in North Africa and Middle East countries

| Location<br>Risk factor (alphabetic order) | Cause                     | DALYs (95% UI)     |                      |                          | Deaths (95% UI)    |                  |                          |
|--------------------------------------------|---------------------------|--------------------|----------------------|--------------------------|--------------------|------------------|--------------------------|
|                                            |                           | PAF (%)            | Rate per 100,000     | Rate change (%)          | PAF (%)            | Rate per 100,000 | Rate change (%)          |
|                                            |                           | 2019               | 2019                 | From 1990 to 2019        | 2019               | 2019             | From 1990 to 2019        |
| High systolic blood pressure               | Ischaemic stroke          | 21.3% (11.5–36.7%) | 272 (137.7–493.8)    | -16.8% (-32.6 to 5.3%)   | 18% (5.9–38.9%)    | 14.4 (4.5–33.7)  | -22.2% (-37.6 to -0.2%)  |
|                                            | Stroke                    | 49.7% (40.9–58.5%) | 872 (662.5–1114.9)   | -47.7% (-59.3 to -34.5%) | 47.4% (36.4–58.9%) | 48.1 (34.3–65)   | -46.5% (-58.9 to -30.8%) |
|                                            | Ischaemic stroke          | 47.9% (37.2–59%)   | 611.4 (445.2–805)    | -27% (-42.9 to -6.3%)    | 45.6% (32.6–59.6%) | 36.5 (24.6–51.3) | -29.3% (-46 to -6.6%)    |
| High temperature                           | Intracerebral haemorrhage | 54.5% (44.1–64%)   | 219.9 (158–290.6)    | -69.3% (-77.2 to -59.2%) | 54.2% (41.1–66.4%) | 10 (7–13.5)      | -70.3% (-77.6 to -60.4%) |
|                                            | Subarachnoid haemorrhage  | 52.9% (42.5–62.5%) | 40.7 (28.9–55.7)     | -64.6% (-75.7 to -44%)   | 53.9% (41.8–65.2%) | 1.5 (1.1–2.2)    | -65.8% (-77.5 to -44.9%) |
|                                            | Stroke                    | 2.8% (1–5%)        | 48.8 (17.6–89)       | -45.4% (-62.6 to -13.9%) | 3.2% (1.2–5.8%)    | 3.3 (1.1–5.9)    | -40.9% (-57.8 to -7%)    |
| Household air pollution from solid fuels   | Ischaemic stroke          | 2.7% (1.4–9%)      | 34.5 (12.3–62.3)     | -24.5% (-47.8 to 16%)    | 3.2% (1.2–5.8%)    | 2.6 (0.9–4.7)    | -24.7% (-46.3 to 17.1%)  |
|                                            | Intracerebral haemorrhage | 3% (1.1–5.4%)      | 12.1 (4.4–22.4)      | -67.6% (-78.7 to -51.1%) | 3.2% (1.2–5.8%)    | 0.6 (0.2–1.1)    | -67.8% (-78.6 to -50.7%) |
|                                            | Subarachnoid haemorrhage  | 2.8% (1–5.1%)      | 2.2 (0.8–4.1)        | -65.6% (-79.3 to -36%)   | 3.2% (1.2–5.8%)    | 0.1 (0–0.2)      | -62.9% (-78.6 to -30.9%) |
| Kidney dysfunction                         | Meningitis                | 0% (0–0%)          | <0.1 (<0.1–<0.1)     | -99.7% (-99.9 to -98.4%) | 0% (0–0%)          | <0.1 (<0.1–<0.1) | -99.7% (-99.9 to -98.4%) |
|                                            | Encephalitis              | 0% (0–0%)          | <0.1 (<0.1–<0.1)     | -98.4% (-99.7 to -90.2%) | 0% (0–0%)          | <0.1 (<0.1–<0.1) | -98.4% (-99.7 to -90.2%) |
|                                            | Stroke                    | 0.1% (0–0.2%)      | 1.3 (0.5–2.7)        | -99.2% (-99.7 to -98.1%) | 0.1% (0–0.1%)      | 0.1 (0–0.1)      | -99.2% (-99.7 to -98.1%) |
| Lead exposure                              | Ischaemic stroke          | 0.1% (0–0.1%)      | 0.9 (0.3–1.8)        | -98.9% (-99.6 to -97.3%) | 0.1% (0–0.1%)      | <0.1 (<0.1–0.1)  | -99% (-99.6 to -97.5%)   |
|                                            | Intracerebral haemorrhage | 0.1% (0–0.2%)      | 0.3 (0.1–0.7)        | -99.5% (-99.8 to -98.8%) | 0.1% (0–0.1%)      | <0.1 (<0.1–<0.1) | -99.6% (-99.8 to -98.9%) |
|                                            | Subarachnoid haemorrhage  | 0.1% (0–0.2%)      | 0.1 (0–0.1)          | -99.5% (-99.8 to -98.7%) | 0.1% (0–0.2%)      | <0.1 (<0.1–<0.1) | -99.5% (-99.8 to -98.7%) |
| Low birth weight                           | Stroke                    | 10.7% (7.6–13.5%)  | 188.2 (124.7–256.3)  | -20.7% (-38.1 to 1.3%)   | 9.4% (4.9–13.6%)   | 9.5 (4.8–14.4)   | -24.6% (-47.3 to -0.8%)  |
|                                            | Ischaemic stroke          | 11.5% (7.4–15.2%)  | 147.3 (89.5–207.2)   | 3.5% (-19.5 to 30.1%)    | 9.2% (3.6–14.2%)   | 7.4 (2.9–11.8)   | -5.4% (-36.3 to 23%)     |
|                                            | Intracerebral haemorrhage | 10.2% (8–12.3%)    | 40.9 (29.2–54.2)     | -57% (-67.6 to -42%)     | 11.6% (7.9–15%)    | 2.1 (1.3–3)      | -55.6% (-67.3 to -39.7%) |
| Low birth weight and short gestation       | Stroke                    | 3.2% (1.4–5.1%)    | 55.5 (24.6–93.2)     | -54.7% (-65.8 to -42.4%) | 3.3% (1.7–5.3%)    | 3.4 (1.6–5.6)    | -46.9% (-59.6 to -32.6%) |
|                                            | Ischaemic stroke          | 3.2% (1.5–5.1%)    | 40.4 (17.6–68.9)     | -31.8% (-47.6 to -15.1%) | 3.2% (1.6–5.4%)    | 2.6 (1.2–4.5)    | -26.4% (-43.2 to -6.6%)  |
|                                            | Intracerebral haemorrhage | 3.2% (1.2–5.7%)    | 12.9 (4.8–23.7)      | -76.4% (-83.7 to -67.8%) | 3.7% (1.6–6.3%)    | 0.7 (0.3–1.2)    | -72.7% (-80.1 to -63.8%) |
| Low physical activity                      | Subarachnoid haemorrhage  | 2.9% (1–5.2%)      | 2.2 (0.7–4.2)        | -74.2% (-84.5 to -58%)   | 3.6% (1.5–6%)      | 0.1 (0–0.2)      | -69.3% (-80.8 to -50%)   |
|                                            | Meningitis                | 3.3% (2–5.2%)      | 1.3 (0.8–2.2)        | -83% (-91.7 to -65.3%)   | 1.7% (1–2.8%)      | <0.1 (<0.1–<0.1) | -83% (-91.7 to -65.3%)   |
|                                            | Encephalitis              | 1.9% (0.9–3.6%)    | 0.4 (0.2–0.6)        | -16.9% (-66.4 to 102.6%) | 1.2% (0.6–2.2%)    | <0.1 (<0.1–<0.1) | -16.9% (-66.4 to 102.6%) |
| Low temperature                            | Meningitis                | 4% (2.4–6.3%)      | 1.6 (0.9–2.7)        | -81.7% (-91.1 to -62.8%) | 2.1% (1.2–3.4%)    | <0.1 (<0.1–<0.1) | -81.7% (-91.1 to -62.8%) |
|                                            | Encephalitis              | 2.3% (1.1–4.3%)    | 0.4 (0.2–0.8)        | -12.2% (-64.5 to 112.1%) | 1.4% (0.7–2.6%)    | <0.1 (<0.1–<0.1) | -12.2% (-64.5 to 112.1%) |
|                                            | Stroke                    | 6.3% (1.4–13.5%)   | 110.3 (23.5–231.6)   | -20.2% (-35.4 to 0.4%)   | 8.1% (1.9–15.9%)   | 8.2 (1.9–16.2)   | -22.9% (-38.5 to -0.6%)  |
| Metabolic risk factors†                    | Ischaemic stroke          | 8.7% (1.9–18.4%)   | 110.3 (23.5–231.6)   | -20.2% (-35.4 to 0.4%)   | 10.3% (2.4–20.2%)  | 8.2 (1.9–16.2)   | -22.9% (-38.5 to -0.6%)  |
|                                            | Stroke                    | 4.1% (0.7–7.2%)    | 71.2 (12.6–130.3)    | -45.5% (-60.5 to -28.8%) | 4.7% (0.8–8.3%)    | 4.8 (0.8–8.8)    | -41% (-56.9 to -24.4%)   |
|                                            | Ischaemic stroke          | 4% (0.7–7%)        | 50.4 (8.5–93.5)      | -24.7% (-46.3 to -2%)    | 4.7% (0.8–8.3%)    | 3.8 (0.6–7)      | -24.7% (-45.9 to -3.5%)  |
| Metabolic risk factors†                    | Intracerebral haemorrhage | 4.4% (0.8–7.7%)    | 17.6 (3.5–31.9)      | -67.7% (-77.5 to -56.3%) | 4.7% (0.8–8.3%)    | 0.9 (0.2–1.6)    | -68% (-77.5 to -56.5%)   |
|                                            | Subarachnoid haemorrhage  | 4.1% (0.7–7.3%)    | 3.2 (0.6–6.1)        | -65.7% (-78 to -43.8%)   | 4.7% (0.8–8.3%)    | 0.1 (0–0.3)      | -63.1% (-76.8 to -39.9%) |
|                                            | Stroke                    | 73.3% (65.4–82.2%) | 1287.3 (1028.1–1590) | -39.7% (-52.4 to -24.6%) | 70% (58.7–83.3%)   | 71.1 (55.1–91.8) | -39.1% (-53.1 to -23.1%) |

**Table S16** Regional and national disabilities and deaths related to neurological conditions attributable to risk factors in North Africa and Middle East countries

| Location<br>Risk factor (alphabetic order) | Cause                                   | DALYs (95% UI)     |                      |                          | Deaths (95% UI)    |                  |                          |
|--------------------------------------------|-----------------------------------------|--------------------|----------------------|--------------------------|--------------------|------------------|--------------------------|
|                                            |                                         | PAF (%)            | Rate per 100,000     | Rate change (%)          | PAF (%)            | Rate per 100,000 | Rate change (%)          |
|                                            |                                         | 2019               | 2019                 | From 1990 to 2019        | 2019               | 2019             | From 1990 to 2019        |
|                                            | Ischaemic stroke                        | 73.4% (63.5–85.2%) | 936.4 (732.6–1185.7) | -18.1% (-35 to 2.2%)     | 69.5% (55.8–86.2%) | 55.7 (41.6–74)   | -21.7% (-39.1 to 0.3%)   |
|                                            | Intracerebral haemorrhage               | 73.7% (65.9–80.7%) | 297.5 (228.6–380.6)  | -65.3% (-73.8 to -53.7%) | 72.5% (62.3–81.6%) | 13.4 (9.9–17.5)  | -66.7% (-75 to -55.9%)   |
|                                            | Subarachnoid haemorrhage                | 69.5% (60.7–77.2%) | 53.4 (39.3–71.6)     | -60.3% (-72.5 to -37.4%) | 69.3% (58.5–78.3%) | 2 (1.4–2.7)      | -61.9% (-74.6 to -39%)   |
|                                            | Neurological disorders*                 | 9% (3–19.6%)       | 121.9 (36.4–312)     | 52.9% (27 to 102.6%)     | 21.7% (8.8–37.5%)  | 8 (1.4–24.7)     | 53.4% (24 to 114.7%)     |
|                                            | Alzheimer's disease and other dementias | 30.3% (14.8–48.8%) | 121.9 (36.4–312)     | 52.9% (27 to 102.6%)     | 29.5% (14–47.8%)   | 8 (1.4–24.7)     | 53.4% (24 to 114.7%)     |
| Non-optimal temperature                    | Stroke                                  | 6.7% (3.4–9.8%)    | 117.8 (58.9–183.6)   | -45.5% (-59.1 to -24.1%) | 7.8% (4–11.3%)     | 7.9 (4–12.2)     | -41% (-55.2 to -19.4%)   |
|                                            | Ischaemic stroke                        | 6.5% (3.3–9.6%)    | 83.4 (41.5–130.2)    | -24.7% (-44.2 to 4%)     | 7.8% (4–11.3%)     | 6.2 (3.1–9.6)    | -24.8% (-43.9 to 1.5%)   |
|                                            | Intracerebral haemorrhage               | 7.2% (3.7–10.5%)   | 29.1 (14.4–45)       | -67.7% (-77.2 to -54.3%) | 7.8% (4–11.3%)     | 1.4 (0.7–2.2)    | -68% (-77 to -54.4%)     |
|                                            | Subarachnoid haemorrhage                | 6.8% (3.5–9.9%)    | 5.3 (2.6–8.4)        | -65.7% (-77.2 to -40.7%) | 7.8% (4–11.3%)     | 0.2 (0.1–0.3)    | -63.1% (-75.7 to -37.5%) |
| Other environmental risks                  | Stroke                                  | 3.2% (1.4–5.1%)    | 55.5 (24.6–93.2)     | -54.7% (-65.8 to -42.4%) | 3.3% (1.7–5.3%)    | 3.4 (1.6–5.6)    | -46.9% (-59.6 to -32.6%) |
|                                            | Ischaemic stroke                        | 3.2% (1.5–5.1%)    | 40.4 (17.6–68.9)     | -31.8% (-47.6 to -15.1%) | 3.2% (1.6–5.4%)    | 2.6 (1.2–4.5)    | -26.4% (-43.2 to -6.6%)  |
|                                            | Intracerebral haemorrhage               | 3.2% (1.2–5.7%)    | 12.9 (4.8–23.7)      | -76.4% (-83.7 to -67.8%) | 3.7% (1.6–6.3%)    | 0.7 (0.3–1.2)    | -72.7% (-80.1 to -63.8%) |
|                                            | Subarachnoid haemorrhage                | 2.9% (1–5.2%)      | 2.2 (0.7–4.2)        | -74.2% (-84.5 to -58%)   | 3.6% (1.5–6%)      | 0.1 (0–0.2)      | -69.3% (-80.8 to -50%)   |
| Particulate matter pollution               | Meningitis                              | 0.8% (0.3–1.5%)    | 0.3 (0.1–0.6)        | -78% (-94 to -3.9%)      | 0.4% (0.1–0.8%)    | <0.1 (<0.1–<0.1) | -78% (-94 to -3.9%)      |
|                                            | Encephalitis                            | 0.4% (0.1–1%)      | 0.1 (0–0.2)          | 6% (-74.1 to 359.5%)     | 0.3% (0.1–0.6%)    | <0.1 (<0.1–<0.1) | 6% (-74.1 to 359.5%)     |
|                                            | Stroke                                  | 23.4% (17–29.3%)   | 410.3 (278.6–551.2)  | -44.6% (-56.3 to -31%)   | 19.2% (13.7–24.5%) | 19.5 (12.9–26.8) | -44.9% (-56.7 to -30.6%) |
|                                            | Ischaemic stroke                        | 22.2% (16–28.2%)   | 283.8 (194–385.1)    | -22.1% (-37.7 to -2.7%)  | 18.4% (13–23.5%)   | 14.8 (9.7–20.2)  | -27.5% (-43.2 to -8.3%)  |
| Secondhand smoke                           | Intracerebral haemorrhage               | 26.2% (19.3–32.5%) | 105.8 (72.3–150.1)   | -67.1% (-75.5 to -56.2%) | 22.1% (16–27.9%)   | 4.1 (2.7–5.8)    | -68.9% (-76.7 to -58.7%) |
|                                            | Subarachnoid haemorrhage                | 27% (19.9–33.8%)   | 20.7 (13.4–29.5)     | -62.1% (-73.7 to -39.9%) | 23.5% (17–29.5%)   | 0.7 (0.4–1)      | -64.4% (-76.1 to -42.1%) |
|                                            | Stroke                                  | 4.7% (3.6–5.8%)    | 82.3 (58.4–109.2)    | -46.1% (-58.5 to -31.3%) | 3.8% (2.9–4.8%)    | 3.9 (2.8–5.2)    | -44% (-56.7 to -28.8%)   |
|                                            | Ischaemic stroke                        | 4.3% (3.2–5.4%)    | 54.8 (38.3–73.4)     | -20.6% (-38.7 to 0.7%)   | 3.6% (2.7–4.6%)    | 2.9 (2.1–3.9)    | -24.5% (-41.9 to -4.7%)  |
| Short gestation                            | Intracerebral haemorrhage               | 5.7% (4.3–7.2%)    | 23 (15.7–31.6)       | -67.6% (-76.4 to -55.5%) | 4.7% (3.6–5.9%)    | 0.9 (0.6–1.2)    | -68.2% (-76.9 to -56.9%) |
|                                            | Subarachnoid haemorrhage                | 5.9% (4.3–7.5%)    | 4.5 (3–6.5)          | -64.6% (-76 to -42.9%)   | 5.1% (3.8–6.4%)    | 0.1 (0.1–0.2)    | -65.3% (-77.1 to -42.9%) |
|                                            | Meningitis                              | 2.9% (1.7–4.4%)    | 1.2 (0.6–1.9)        | -78.5% (-89.6 to -56.3%) | 1.5% (0.8–2.5%)    | <0.1 (<0.1–<0.1) | -78.5% (-89.6 to -56.3%) |
|                                            | Encephalitis                            | 1.6% (0.8–3.1%)    | 0.3 (0.2–0.6)        | 2.6% (-59.1 to 150.2%)   | 1% (0.5–1.8%)      | <0.1 (<0.1–<0.1) | 2.6% (-59.2 to 150.2%)   |
| Smoking                                    | Stroke                                  | 11.2% (10–12.8%)   | 197.1 (156–245.9)    | -53% (-63.5 to -39.8%)   | 8.5% (7.5–9.9%)    | 8.7 (6.6–10.9)   | -55.2% (-65.8 to -41.3%) |
|                                            | Ischaemic stroke                        | 10.6% (9.4–12.1%)  | 135.7 (105.2–172.4)  | -34.6% (-49.1 to -14.4%) | 8% (6.8–9.3%)      | 6.4 (4.7–8.2)    | -41% (-55.2 to -21.9%)   |
|                                            | Intracerebral haemorrhage               | 12.8% (10.8–15%)   | 51.7 (38–67.6)       | -72% (-79.8 to -61.5%)   | 10.5% (8.8–12.4%)  | 1.9 (1.4–2.6)    | -74.2% (-81.6 to -63.8%) |
|                                            | Subarachnoid haemorrhage                | 12.6% (9.8–15.5%)  | 9.7 (6.3–14.5)       | -64.5% (-78 to -39.6%)   | 11.3% (8.5–14.2%)  | 0.3 (0.2–0.5)    | -67.2% (-80.1 to -42.2%) |
|                                            | Neurological disorders*                 | 5% (1.8–10.5%)     | 68.1 (22.2–168.1)    | -16.6% (-31.9 to 2.7%)   | 11.7% (4.1–18.9%)  | 4.4 (0.6–13.9)   | -18.4% (-37 to 17.8%)    |
|                                            | Alzheimer's disease and other dementias | 18.3% (12–24.6%)   | 73.5 (28.4–173.9)    | -19.7% (-34.5 to -3.1%)  | 18.2% (11.7–24.7%) | 4.9 (1.1–14.2)   | -21.2% (-38.2 to 0.7%)   |

**Table S16** Regional and national disabilities and deaths related to neurological conditions attributable to risk factors in North Africa and Middle East countries

| Location<br>Risk factor (alphabetic order) | Cause                                   | DALYs (95% UI)     |                     |                           | Deaths (95% UI)    |                  |                            |
|--------------------------------------------|-----------------------------------------|--------------------|---------------------|---------------------------|--------------------|------------------|----------------------------|
|                                            |                                         | PAF (%)            | Rate per 100,000    | Rate change (%)           | PAF (%)            | Rate per 100,000 | Rate change (%)            |
|                                            |                                         | 2019               | 2019                | From 1990 to 2019         | 2019               | 2019             | From 1990 to 2019          |
| Tobacco                                    | Parkinson's disease                     | -9.1% (-13.6–4.9%) | -7.2 (-11.5–3.7)    | -38% (-55.3 to -14.6%)    | -8.7% (-13–4.6%)   | -0.5 (-0.8–0.2)  | -39.9% (-57.7 to -14.3%)   |
|                                            | Multiple sclerosis                      | 9.3% (6.6–12.1%)   | 1.9 (1.2–2.6)       | -1.8% (-30.6 to 27.5%)    | 10.5% (7.3–14.1%)  | <0.1 (<0.1–<0.1) | -14.5% (-53.2 to 30.4%)    |
|                                            | Stroke                                  | 15.4% (13.9–17.1%) | 270.6 (214.7–337.9) | -51.1% (-61.5 to -37.8%)  | 12% (10.6–13.6%)   | 12.2 (9.5–15.3)  | -52.2% (-62.9 to -38.4%)   |
|                                            | Ischaemic stroke                        | 14.5% (12.9–16.1%) | 184.8 (144.7–232)   | -31.1% (-46.2 to -12%)    | 11.3% (9.8–12.8%)  | 9 (6.9–11.4)     | -36.7% (-51 to -18.2%)     |
|                                            | Intracerebral haemorrhage               | 17.9% (15.8–20.2%) | 72.1 (53.9–93.8)    | -70.7% (-78.6 to -60.1%)  | 14.7% (12.8–16.7%) | 2.7 (2–3.5)      | -72.6% (-80.1 to -62.2%)   |
|                                            | Subarachnoid haemorrhage                | 17.8% (15.2–20.7%) | 13.7 (9.5–19.7)     | -64.4% (-76.6 to -42.7%)  | 15.9% (13.2–18.8%) | 0.5 (0.3–0.7)    | -66.6% (-78.7 to -44.2%)   |
|                                            | Neurological disorders*                 | 5% (1.8–10.5%)     | 68.1 (22.2–168.1)   | -16.6% (-31.9 to 2.7%)    | 11.7% (4.1–18.9%)  | 4.4 (0.6–13.9)   | -18.4% (-37 to 17.8%)      |
|                                            | Alzheimer's disease and other dementias | 18.3% (12–24.6%)   | 73.5 (28.4–173.9)   | -19.7% (-34.5 to -3.1%)   | 18.2% (11.7–24.7%) | 4.9 (1.1–14.2)   | -21.2% (-38.2 to 0.7%)     |
|                                            | Parkinson's disease                     | -9.1% (-13.6–4.9%) | -7.2 (-11.5–3.7)    | -38% (-55.3 to -14.6%)    | -8.7% (-13–4.6%)   | -0.5 (-0.8–0.2)  | -39.9% (-57.7 to -14.3%)   |
|                                            | Multiple sclerosis                      | 9.3% (6.6–12.1%)   | 1.9 (1.2–2.6)       | -1.8% (-30.6 to 27.5%)    | 10.5% (7.3–14.1%)  | <0.1 (<0.1–<0.1) | -14.5% (-53.2 to 30.4%)    |
| <b>Bahrain</b>                             |                                         |                    |                     |                           |                    |                  |                            |
| Air pollution                              | Meningitis                              | 0.4% (0.2–0.7%)    | 0.1 (0–0.1)         | -88.8% (-95.5 to -71.5%)  | 0.2% (0.1–0.3%)    | <0.1 (<0.1–<0.1) | -88.8% (-95.5 to -71.5%)   |
|                                            | Encephalitis                            | 0.2% (0.1–0.4%)    | <0.1 (<0.1–<0.1)    | -52.7% (-83.4 to 28.6%)   | 0.1% (0.1–0.3%)    | <0.1 (<0.1–<0.1) | -52.8% (-83.4 to 28.6%)    |
|                                            | Stroke                                  | 32.4% (28–36.5%)   | 305.3 (242.7–382.6) | -54.8% (-63.5 to -43.6%)  | 27.7% (23.9–31.5%) | 14.6 (11.4–19.4) | -53.1% (-63.3 to -40.9%)   |
|                                            | Ischaemic stroke                        | 30.8% (26.7–34.9%) | 189.2 (151.9–238.4) | -46.7% (-56.8 to -35%)    | 26.3% (22.6–30.1%) | 9.9 (7.7–13.2)   | -45.9% (-58.5 to -31.7%)   |
|                                            | Intracerebral haemorrhage               | 35.5% (30.8–39.8%) | 94.1 (73.7–121.5)   | -65.9% (-73.8 to -55.2%)  | 30.7% (26.6–34.9%) | 4 (3.1–5.3)      | -64.7% (-73.1 to -53.1%)   |
|                                            | Subarachnoid haemorrhage                | 35.1% (30.6–39.3%) | 22 (16.3–31.6)      | -51.5% (-67.1 to -30.5%)  | 32.5% (28.2–36.5%) | 0.7 (0.5–1.1)    | -53.2% (-70 to -29.4%)     |
| Alcohol use                                | Stroke                                  | 0.7% (0.2–1.3%)    | 6.7 (2.2–11.9)      | -86.7% (-95 to -77.4%)    | 0.3% (0–0.7%)      | 0.2 (0–0.4)      | -90.6% (-100.3 to -80.6%)  |
|                                            | Ischaemic stroke                        | 0.1% (-0.3–0.5%)   | 0.4 (-2.3–2)        | -95.1% (-168.3 to -73.5%) | -0.1% (-0.4–0.2%)  | 0 (-0.1–0.1)     | -108.1% (-307.6 to -76.5%) |
|                                            | Intracerebral haemorrhage               | 2.4% (1.2–3.7%)    | 6.2 (3.1–10.1)      | -84.9% (-91.4 to -76.7%)  | 1.5% (0.7–2.5%)    | 0.2 (0.1–0.3)    | -86.6% (-93 to -78.4%)     |
|                                            | Neurological disorders*                 | 0.5% (0.2–1%)      | 6.9 (2.9–12.8)      | -64.8% (-85.2 to -20%)    | 0.2% (0.1–0.5%)    | 0.1 (0–0.1)      | -68.1% (-79.3 to -53.2%)   |
|                                            | Idiopathic epilepsy                     | 3.7% (2.4–5.6%)    | 6.9 (2.9–12.8)      | -64.8% (-85.2 to -20%)    | 3.6% (2.2–5.4%)    | 0.1 (0–0.1)      | -68.1% (-79.3 to -53.2%)   |
| All risk factors                           | Meningitis                              | 1.8% (1.2–2.5%)    | 0.3 (0.2–0.5)       | -88.3% (-93.6 to -79.2%)  | 0.9% (0.6–1.3%)    | <0.1 (<0.1–<0.1) | -88.3% (-93.6 to -79.2%)   |
|                                            | Encephalitis                            | 1% (0.6–1.6%)      | 0.1 (0.1–0.2)       | -50.5% (-77.4 to 0.3%)    | 0.7% (0.4–1%)      | <0.1 (<0.1–<0.1) | -50.5% (-77.5 to 0.3%)     |
|                                            | Stroke                                  | 86.9% (82.9–90.8%) | 818.1 (689.8–989.9) | -52.2% (-61 to -41.9%)    | 84.8% (78.8–91%)   | 44.8 (36.4–56.8) | -49.1% (-59.1 to -37.3%)   |
|                                            | Ischaemic stroke                        | 87% (81.6–92.8%)   | 533.7 (449.2–646.3) | -44.2% (-53.9 to -33.1%)  | 84.6% (76.9–93.1%) | 31.8 (25.5–40.5) | -42.1% (-54.2 to -28.9%)   |
|                                            | Intracerebral haemorrhage               | 88.3% (84.1–91.7%) | 233.8 (190.5–290.2) | -64.2% (-72.1 to -54.1%)  | 85.7% (79.4–91.3%) | 11.2 (9–14.5)    | -61.8% (-70.6 to -50.6%)   |
|                                            | Subarachnoid haemorrhage                | 80.6% (76–85.1%)   | 50.6 (38.5–71.7)    | -50.7% (-66.3 to -29.3%)  | 82.7% (76.5–88.2%) | 1.8 (1.3–2.7)    | -50.9% (-68.8 to -27.3%)   |
|                                            | Neurological disorders*                 | 14.8% (6.1–29.7%)  | 203.7 (76.1–504.8)  | 6.5% (-11.7 to 23.9%)     | 32.8% (15.1–51.6%) | 12.9 (2.5–39.2)  | 15% (-5.1 to 41.4%)        |
|                                            | Alzheimer's disease and other dementias | 50.2% (33–68%)     | 202.7 (75.4–507.7)  | 11.4% (-5.5 to 29.4%)     | 48.3% (30.8–66.1%) | 13.2 (2.8–39.5)  | 13.5% (-6.5 to 35.9%)      |
|                                            | Parkinson's disease                     | -8.2% (-12.5–4.4%) | -7.3 (-11.8–3.6)    | -38.3% (-57.6 to -11.6%)  | -7.4% (-11.4–3.8%) | -0.4 (-0.7–0.2)  | -34.2% (-56.4 to -4.9%)    |



**Table S16** Regional and national disabilities and deaths related to neurological conditions attributable to risk factors in North Africa and Middle East countries

| Location<br>Risk factor (alphabetic order) | Cause                                   | DALYs (95% UI)     |                     |                          | Deaths (95% UI)    |                  |                          |
|--------------------------------------------|-----------------------------------------|--------------------|---------------------|--------------------------|--------------------|------------------|--------------------------|
|                                            |                                         | PAF (%)            | Rate per 100,000    | Rate change (%)          | PAF (%)            | Rate per 100,000 | Rate change (%)          |
|                                            |                                         | 2019               | 2019                | From 1990 to 2019        | 2019               | 2019             | From 1990 to 2019        |
| Ambient particulate matter pollution       | Idiopathic epilepsy                     | 3.7% (2.4–5.6%)    | 6.9 (2.9–12.8)      | -64.8% (-85.2 to -20%)   | 3.6% (2.2–5.4%)    | 0.1 (0–0.1)      | -68.1% (-79.3 to -53.2%) |
|                                            | Multiple sclerosis                      | 10.7% (7.7–13.9%)  | 1.3 (0.8–2)         | -4.7% (-30 to 22.4%)     | 11.1% (7.6–14.6%)  | <0.1 (<0.1–<0.1) | -25.6% (-60.1 to 10%)    |
|                                            | Meningitis                              | 0.4% (0.2–0.6%)    | 0.1 (0–0.1)         | -87.6% (-95 to -68.2%)   | 0.2% (0.1–0.3%)    | <0.1 (<0.1–<0.1) | -87.6% (-95 to -68.2%)   |
|                                            | Encephalitis                            | 0.2% (0.1–0.4%)    | <0.1 (<0.1–<0.1)    | -47.6% (-81.9 to 42.9%)  | 0.1% (0.1–0.3%)    | <0.1 (<0.1–<0.1) | -47.6% (-81.9 to 42.9%)  |
|                                            | Stroke                                  | 32.4% (28–36.4%)   | 304.4 (241.6–382)   | -50.8% (-60.9 to -37.8%) | 27.6% (23.8–31.4%) | 14.6 (11.4–19.3) | -48.8% (-60.1 to -33.9%) |
|                                            | Ischaemic stroke                        | 30.7% (26.6–34.8%) | 188.6 (151.5–238.1) | -41.8% (-53.9 to -27.7%) | 26.2% (22.6–30.1%) | 9.9 (7.7–13.2)   | -40.9% (-54.4 to -24.4%) |
|                                            | Intracerebral haemorrhage               | 35.4% (30.8–39.7%) | 93.8 (73.5–121.1)   | -62.8% (-71.7 to -51%)   | 30.6% (26.5–34.6%) | 4 (3.1–5.3)      | -61.5% (-71.2 to -48.1%) |
| Behavioural risk factors‡                  | Subarachnoid haemorrhage                | 35% (30.5–39.2%)   | 22 (16.3–31.5)      | -47.2% (-64.1 to -23%)   | 32.4% (28.1–36.4%) | 0.7 (0.5–1.1)    | -49% (-67.1 to -23.3%)   |
|                                            | Meningitis                              | 1.7% (1.2–2.4%)    | 0.3 (0.2–0.5)       | -88.1% (-93.5 to -78.8%) | 0.9% (0.6–1.2%)    | <0.1 (<0.1–<0.1) | -88.1% (-93.5 to -78.8%) |
|                                            | Encephalitis                            | 1% (0.6–1.6%)      | 0.1 (0.1–0.2)       | -49.5% (-77.1 to 2%)     | 0.6% (0.4–1%)      | <0.1 (<0.1–<0.1) | -49.5% (-77.1 to 2%)     |
|                                            | Stroke                                  | 29.8% (24.9–35.6%) | 280.1 (215.7–361.9) | -59% (-67.5 to -49.6%)   | 26.6% (20.9–32.8%) | 14 (10.1–19.2)   | -56.2% (-65.9 to -45%)   |
|                                            | Ischaemic stroke                        | 31.2% (24.3–39%)   | 191.4 (141–254.7)   | -50.4% (-59.8 to -40.8%) | 28.2% (20.6–36.6%) | 10.6 (7.3–14.9)  | -48.2% (-59.9 to -36%)   |
|                                            | Intracerebral haemorrhage               | 27.3% (22.4–32.7%) | 72.3 (53.7–96.5)    | -72.2% (-79 to -63.1%)   | 22.3% (18.1–27.3%) | 2.9 (2.2–4)      | -71.7% (-78.7 to -62.1%) |
|                                            | Subarachnoid haemorrhage                | 26.2% (20.8–31.8%) | 16.5 (11.4–24.5)    | -56.6% (-71.5 to -36.6%) | 23.6% (18.6–29.2%) | 0.5 (0.4–0.8)    | -58.8% (-74.2 to -37.7%) |
|                                            | Neurological disorders*                 | 4.8% (1.9–9.8%)    | 66 (25–153.9)       | -24.2% (-43.2 to -3.8%)  | 8.8% (2.6–14.9%)   | 3.5 (0.4–10.7)   | -12.4% (-33 to 18.9%)    |
|                                            | Alzheimer's disease and other dementias | 16.2% (9.7–22.5%)  | 65 (24.5–154.3)     | -16.5% (-33.8 to 6.7%)   | 14.3% (8.5–20.3%)  | 3.9 (0.8–11)     | -13.3% (-34.4 to 12.4%)  |
|                                            | Parkinson's disease                     | -8.2% (-12.5–4.4%) | -7.3 (-11.8–3.6)    | -38.3% (-57.6 to -11.6%) | -7.4% (-11.4–3.8%) | -0.4 (-0.7–0.2)  | -34.2% (-56.4 to -4.9%)  |
| Child and maternal malnutrition            | Idiopathic epilepsy                     | 3.7% (2.4–5.6%)    | 6.9 (2.9–12.8)      | -64.8% (-85.2 to -20%)   | 3.6% (2.2–5.4%)    | 0.1 (0–0.1)      | -68.1% (-79.3 to -53.2%) |
|                                            | Multiple sclerosis                      | 10.7% (7.7–13.9%)  | 1.3 (0.8–2)         | -4.7% (-30 to 22.4%)     | 11.1% (7.6–14.6%)  | <0.1 (<0.1–<0.1) | -25.6% (-60.1 to 10%)    |
|                                            | Meningitis                              | 1.7% (1.2–2.4%)    | 0.3 (0.2–0.5)       | -88.1% (-93.5 to -78.8%) | 0.9% (0.6–1.2%)    | <0.1 (<0.1–<0.1) | -88.1% (-93.5 to -78.8%) |
|                                            | Encephalitis                            | 1% (0.6–1.6%)      | 0.1 (0.1–0.2)       | -49.5% (-77.1 to 2%)     | 0.6% (0.4–1%)      | <0.1 (<0.1–<0.1) | -49.5% (-77.1 to 2%)     |
|                                            | Stroke                                  | 4.5% (1.9–6.5%)    | 42 (17.3–65.3)      | -54.1% (-65.9 to -38.7%) | 3.3% (1.4–5%)      | 1.8 (0.7–2.8)    | -53.6% (-66.4 to -36.3%) |
| Diet high in red meat                      | Ischaemic stroke                        | 3.8% (0.9–5.9%)    | 23.4 (5.4–38.1)     | -44.3% (-57.6 to -26.4%) | 2.8% (0.6–4.5%)    | 1.1 (0.2–1.8)    | -45% (-60.9 to -24.6%)   |
|                                            | Intracerebral haemorrhage               | 5.6% (1.3–8.8%)    | 14.8 (3.5–25.1)     | -64.7% (-74.7 to -51.3%) | 4.5% (0.9–7.1%)    | 0.6 (0.1–1)      | -63.9% (-74.3 to -50.1%) |
|                                            | Subarachnoid haemorrhage                | 6% (1.5–9.4%)      | 3.8 (0.9–6.4)       | -49.6% (-67.4 to -24.4%) | 5% (1.1–7.9%)      | 0.1 (0–0.2)      | -52.1% (-70.2 to -27.2%) |
|                                            | Stroke                                  | 1.8% (0.3–7.2%)    | 17.1 (2.3–68.4)     | -53.3% (-72.3 to -19.7%) | 1.4% (0.3–5.8%)    | 0.8 (0.1–3.1)    | -52.6% (-71 to -16%)     |
| Diet high in sodium                        | Ischaemic stroke                        | 1.6% (0.3–6.5%)    | 9.9 (1.5–39.8)      | -44.4% (-68.3 to -6%)    | 1.3% (0.3–5.1%)    | 0.5 (0.1–1.9)    | -44.2% (-67.3 to -2%)    |
|                                            | Intracerebral haemorrhage               | 2.2% (0.3–8.7%)    | 5.8 (0.7–24.4)      | -64.2% (-79.7 to -33.8%) | 1.8% (0.3–7.4%)    | 0.2 (0–1.1)      | -63.8% (-78.7 to -31.6%) |
|                                            | Subarachnoid haemorrhage                | 2.2% (0.2–8.5%)    | 1.4 (0.1–5.5)       | -46.9% (-71.9 to 2.1%)   | 2% (0.3–8%)        | <0.1 (<0.1–0.2)  | -49.7% (-73 to -3.2%)    |
|                                            | Stroke                                  | 0.7% (0.3–1.6%)    | 6.9 (2.3–15.3)      | -63.5% (-76.4 to -43.7%) | 0.7% (0.2–1.5%)    | 0.4 (0.1–0.8)    | -61.5% (-76.1 to -38.6%) |
| Diet low in fibre                          | Ischaemic stroke                        | 0.7% (0.2–1.5%)    | 4.3 (1.5–9.6)       | -56.7% (-72.1 to -33.4%) | 0.6% (0.2–1.4%)    | 0.2 (0.1–0.5)    | -55.7% (-73.8 to -26.7%) |
|                                            | Intracerebral haemorrhage               | 0.8% (0.3–1.7%)    | 2.1 (0.7–4.7)       | -72.5% (-83 to -55.4%)   | 0.7% (0.3–1.6%)    | 0.1 (0–0.2)      | -70.9% (-82 to -54.1%)   |



**Table S16** Regional and national disabilities and deaths related to neurological conditions attributable to risk factors in North Africa and Middle East countries

| Location<br>Risk factor (alphabetic order) | Cause                                   | DALYs (95% UI)     |                     |                          | Deaths (95% UI)    |                  |                          |
|--------------------------------------------|-----------------------------------------|--------------------|---------------------|--------------------------|--------------------|------------------|--------------------------|
|                                            |                                         | PAF (%)            | Rate per 100,000    | Rate change (%)          | PAF (%)            | Rate per 100,000 | Rate change (%)          |
|                                            |                                         | 2019               | 2019                | From 1990 to 2019        | 2019               | 2019             | From 1990 to 2019        |
| Diet low in fruits                         | Subarachnoid haemorrhage                | 0.9% (0.2–1.9%)    | 0.5 (0.1–1.3)       | -62.7% (-77.9 to -34.2%) | 0.8% (0.3–1.7%)    | <0.1 (<0.1–<0.1) | -63.2% (-78.6 to -34.3%) |
|                                            | Stroke                                  | 2.3% (1.1–3.7%)    | 21.5 (10–36.1)      | -60.5% (-73.4 to -42%)   | 1.7% (0.8–3%)      | 0.9 (0.4–1.6)    | -60.3% (-75.6 to -36.1%) |
|                                            | Ischaemic stroke                        | 1.7% (0.4–3.3%)    | 10.3 (2.3–20.7)     | -51.2% (-67.6 to -28.2%) | 1.3% (0.3–2.7%)    | 0.5 (0.1–1)      | -52% (-71.7 to -22.3%)   |
|                                            | Intracerebral haemorrhage               | 3.3% (1.5–5.6%)    | 8.8 (4–15.5)        | -68.5% (-79.1 to -52.1%) | 2.7% (1.2–4.5%)    | 0.3 (0.2–0.6)    | -68.2% (-80.2 to -50.6%) |
| Diet low in vegetables                     | Subarachnoid haemorrhage                | 3.8% (1.8–6.7%)    | 2.4 (1.1–4.3)       | -55.6% (-72.7 to -32.7%) | 3% (1.4–5.2%)      | 0.1 (0–0.1)      | -58.5% (-75.7 to -31.9%) |
|                                            | Stroke                                  | 0.7% (0.2–1.5%)    | 6.6 (2.1–14.4)      | -70.2% (-81.3 to -53.2%) | 0.7% (0.2–1.4%)    | 0.4 (0.1–0.7)    | -67.1% (-80.2 to -48.3%) |
|                                            | Ischaemic stroke                        | 0.7% (0.2–1.4%)    | 4.2 (1.2–8.8)       | -63.2% (-76.7 to -42.4%) | 0.7% (0.2–1.4%)    | 0.2 (0.1–0.5)    | -60.6% (-76.1 to -38.5%) |
|                                            | Intracerebral haemorrhage               | 0.8% (0.2–2.4%)    | 2 (0.5–6.6)         | -78.6% (-88.2 to -61.2%) | 0.8% (0.2–2.4%)    | 0.1 (0–0.3)      | -76.2% (-86.7 to -57.2%) |
| Diet low in whole grains                   | Subarachnoid haemorrhage                | 0.7% (0.2–2.4%)    | 0.5 (0.1–1.6)       | -71% (-84.6 to -44.6%)   | 0.8% (0.2–2.4%)    | <0.1 (<0.1–0.1)  | -70% (-84.6 to -41.7%)   |
|                                            | Stroke                                  | 4% (1.5–5.6%)      | 37.7 (14–55.6)      | -49.3% (-60.7 to -39%)   | 3.7% (1.5–5.1%)    | 2 (0.8–2.9)      | -48.6% (-60.4 to -35.7%) |
|                                            | Ischaemic stroke                        | 6.1% (2.3–8.5%)    | 37.7 (14–55.6)      | -49.3% (-60.7 to -39%)   | 5.3% (2.1–7.2%)    | 2 (0.8–2.9)      | -48.6% (-60.4 to -35.7%) |
| Dietary risks                              | Stroke                                  | 13.1% (9.2–18.2%)  | 123.6 (83.6–180.8)  | -55.6% (-64.9 to -45%)   | 11.1% (7.7–15.4%)  | 5.8 (3.9–8.7)    | -54.5% (-64.7 to -42.9%) |
|                                            | Ischaemic stroke                        | 13.6% (8.7–18.4%)  | 83.7 (52.3–120.8)   | -48.9% (-58.8 to -38.2%) | 11.4% (7.5–15.3%)  | 4.3 (2.6–6.2)    | -48.7% (-60.1 to -35.7%) |
|                                            | Intracerebral haemorrhage               | 12% (6.5–18.3%)    | 31.8 (16.5–51.1)    | -67.3% (-76.2 to -56.9%) | 10.1% (5.4–15.6%)  | 1.3 (0.7–2.1)    | -66.6% (-75.9 to -55.4%) |
|                                            | Subarachnoid haemorrhage                | 12.8% (7.1–19%)    | 8 (4.1–12.9)        | -53.5% (-69.5 to -33%)   | 11% (6–16.8%)      | 0.2 (0.1–0.4)    | -55.8% (-72.5 to -32.7%) |
| Environmental/occupational risk factors§   | Meningitis                              | 0.4% (0.2–0.7%)    | 0.1 (0–0.1)         | -88.8% (-95.5 to -71.5%) | 0.2% (0.1–0.3%)    | <0.1 (<0.1–<0.1) | -88.8% (-95.5 to -71.5%) |
|                                            | Encephalitis                            | 0.2% (0.1–0.4%)    | <0.1 (<0.1–<0.1)    | -52.7% (-83.4 to 28.6%)  | 0.1% (0.1–0.3%)    | <0.1 (<0.1–<0.1) | -52.8% (-83.4 to 28.6%)  |
|                                            | Stroke                                  | 37.8% (33–42.2%)   | 355.7 (283.7–453.8) | -54.6% (-63.3 to -43.1%) | 34.4% (29.5–38.9%) | 18.2 (13.9–25)   | -51.6% (-61.8 to -37.6%) |
|                                            | Ischaemic stroke                        | 36.1% (31.3–40.4%) | 221.7 (178.1–283.4) | -46.3% (-56.3 to -33.8%) | 33.1% (28.1–37.6%) | 12.4 (9.5–17.1)  | -44.1% (-56.3 to -27.7%) |
|                                            | Intracerebral haemorrhage               | 41.1% (36.1–45.9%) | 108.7 (84.7–139.9)  | -65.8% (-73.8 to -54.6%) | 37.3% (32.2–42.1%) | 4.9 (3.7–6.5)    | -63.7% (-72.3 to -50.8%) |
|                                            | Subarachnoid haemorrhage                | 40.2% (35.4–45.1%) | 25.3 (18.5–36.3)    | -53.1% (-68 to -31.7%)   | 38.8% (33.6–43.7%) | 0.9 (0.6–1.3)    | -52.8% (-69.7 to -29.2%) |
| High body-mass index                       | Stroke                                  | 33.8% (24.3–42.5%) | 317.5 (218.2–428.4) | -49.7% (-59.4 to -36.6%) | 20.8% (13.2–28.7%) | 11 (6.6–16)      | -50.2% (-62.1 to -35.4%) |
|                                            | Ischaemic stroke                        | 26.2% (17.7–35.1%) | 160.4 (103.6–226.9) | -36.4% (-48.4 to -21.2%) | 15.9% (8.7–24.6%)  | 6 (3.1–10)       | -37.9% (-53.9 to -20%)   |
|                                            | Intracerebral haemorrhage               | 47.2% (35.2–58.1%) | 124.9 (85.1–168.8)  | -61% (-69.8 to -47.9%)   | 31.7% (20.9–43.8%) | 4.1 (2.6–6.2)    | -61.5% (-71.7 to -47.9%) |
|                                            | Subarachnoid haemorrhage                | 51.6% (40–61.4%)   | 32.3 (22.4–46.3)    | -44.9% (-61.8 to -20.7%) | 38% (27.1–49.6%)   | 0.8 (0.5–1.3)    | -48.2% (-66.4 to -21.6%) |
|                                            | Neurological disorders*                 | 6.6% (2–14.6%)     | 90.4 (24.9–226.4)   | 21.3% (1.5 to 56.7%)     | 15.2% (5.2–28.3%)  | 5.9 (1–17.6)     | 20.6% (-2.5 to 62.9%)    |
|                                            | Alzheimer's disease and other dementias | 22.4% (9.8–38.2%)  | 90.4 (24.9–226.4)   | 21.3% (1.5 to 56.7%)     | 21.6% (9.3–37.4%)  | 5.9 (1–17.6)     | 20.6% (-2.5 to 62.9%)    |
| High fasting plasma glucose                | Stroke                                  | 30.7% (19.8–47.9%) | 289.5 (179.9–474.6) | -53.2% (-64.3 to -40.1%) | 30.1% (17.3–54.3%) | 16 (8.9–30.9)    | -51.7% (-64.8 to -37.4%) |
|                                            | Ischaemic stroke                        | 31.4% (17.4–57.5%) | 193.4 (101.1–355.5) | -47.2% (-60.3 to -32.3%) | 30.1% (14.1–63.6%) | 11.4 (5.2–24.9)  | -45.9% (-61 to -29.6%)   |
|                                            | Intracerebral haemorrhage               | 30.4% (19.9–43.1%) | 80.6 (48.8–123.8)   | -64% (-73.3 to -50%)     | 30.2% (18.5–48.1%) | 3.9 (2.3–6.6)    | -63.3% (-73.3 to -49.9%) |
|                                            | Subarachnoid haemorrhage                | 24.5% (15.4–35.7%) | 15.4 (9–25.8)       | -46% (-66.6 to -18.1%)   | 28.4% (18–42.6%)   | 0.6 (0.4–1.1)    | -50.3% (-70.1 to -23.4%) |
|                                            | Neurological disorders*                 | 6.9% (1.4–17.8%)   | 94.8 (18.8–285.2)   | 47.2% (25.7 to 81.8%)    | 16.2% (3.9–34.2%)  | 6.3 (0.8–22)     | 47.1% (22.5 to 87.5%)    |

**Table S16** Regional and national disabilities and deaths related to neurological conditions attributable to risk factors in North Africa and Middle East countries

| Location<br>Risk factor (alphabetic order) | Cause                                   | DALYs (95% UI)     |                     |                          | Deaths (95% UI)    |                  |                          |
|--------------------------------------------|-----------------------------------------|--------------------|---------------------|--------------------------|--------------------|------------------|--------------------------|
|                                            |                                         | PAF (%)            | Rate per 100,000    | Rate change (%)          | PAF (%)            | Rate per 100,000 | Rate change (%)          |
|                                            |                                         | 2019               | 2019                | From 1990 to 2019        | 2019               | 2019             | From 1990 to 2019        |
|                                            | Alzheimer's disease and other dementias | 23.4% (6.7–44.2%)  | 94.8 (18.8–285.2)   | 47.2% (25.7 to 81.8%)    | 23% (6.5–43.5%)    | 6.3 (0.8–22)     | 47.1% (22.5 to 87.5%)    |
| High LDL cholesterol                       | Stroke                                  | 15.5% (7.5–28.1%)  | 145.6 (68.1–271.2)  | -45.2% (-55.6 to -34%)   | 14.8% (3.9–32.9%)  | 7.8 (2–18.6)     | -43.9% (-59.2 to -30.7%) |
|                                            | Ischaemic stroke                        | 23.7% (11.6–43%)   | 145.6 (68.1–271.2)  | -45.2% (-55.6 to -34%)   | 20.8% (5.5–46.5%)  | 7.8 (2–18.6)     | -43.9% (-59.2 to -30.7%) |
| High systolic blood pressure               | Stroke                                  | 52.1% (43.5–61.1%) | 490.3 (383.5–626.8) | -52.6% (-62.5 to -40.1%) | 48.6% (38.1–60.2%) | 25.6 (18.5–35.4) | -49.8% (-61.7 to -34.9%) |
|                                            | Ischaemic stroke                        | 49.4% (38.5–61.2%) | 302.9 (225.9–407.5) | -44% (-55.7 to -29.8%)   | 45.7% (33–60.8%)   | 17.2 (11.5–24.9) | -42.4% (-56.6 to -25%)   |
|                                            | Intracerebral haemorrhage               | 58.1% (47.8–68.2%) | 153.9 (113.9–199)   | -63.9% (-72.1 to -52.3%) | 55.7% (42–69.1%)   | 7.3 (5–10)       | -61.5% (-70.8 to -49%)   |
|                                            | Subarachnoid haemorrhage                | 53.4% (44.5–62.3%) | 33.6 (24–48.8)      | -49.1% (-65.7 to -25.9%) | 55.1% (43.6–66.8%) | 1.2 (0.8–1.9)    | -49.8% (-68.2 to -25%)   |
| High temperature                           | Stroke                                  | 3.5% (0.6–6.1%)    | 33.4 (5.3–64)       | -50.1% (-72.5 to -33.5%) | 4.3% (0.7–7.6%)    | 2.3 (0.4–4.5)    | -41.4% (-67.7 to -21.7%) |
|                                            | Ischaemic stroke                        | 3.3% (0.6–5.8%)    | 20.6 (3.4–40.3)     | -40.6% (-68.3 to -20.8%) | 4.3% (0.7–7.6%)    | 1.6 (0.3–3.2)    | -33.4% (-63.8 to -11.7%) |
|                                            | Intracerebral haemorrhage               | 3.9% (0.6–6.8%)    | 10.4 (1.6–19.9)     | -61.3% (-78.6 to -46.4%) | 4.3% (0.7–7.6%)    | 0.6 (0.1–1.1)    | -55.9% (-74.9 to -38.9%) |
|                                            | Subarachnoid haemorrhage                | 3.8% (0.6–6.5%)    | 2.4 (0.4–5.2)       | -55.6% (-76.8 to -31.4%) | 4.3% (0.7–7.6%)    | 0.1 (0–0.2)      | -46.4% (-73.1 to -17.1%) |
| Household air pollution from solid fuels   | Meningitis                              | 0% (0–0%)          | <0.1 (<0.1–<0.1)    | -99.6% (-99.9 to -98.8%) | 0% (0–0%)          | <0.1 (<0.1–<0.1) | -99.6% (-99.9 to -98.8%) |
|                                            | Encephalitis                            | 0% (0–0%)          | <0.1 (<0.1–<0.1)    | -98.4% (-99.6 to -94.5%) | 0% (0–0%)          | <0.1 (<0.1–<0.1) | -98.4% (-99.6 to -94.5%) |
|                                            | Stroke                                  | 0.1% (0–0.2%)      | 0.9 (0.3–2.1)       | -98.5% (-99.4 to -96.4%) | 0.1% (0–0.2%)      | <0.1 (<0.1–0.1)  | -98.4% (-99.4 to -96.4%) |
|                                            | Ischaemic stroke                        | 0.1% (0–0.2%)      | 0.5 (0.2–1.3)       | -98.3% (-99.3 to -95.9%) | 0.1% (0–0.2%)      | <0.1 (<0.1–0.1)  | -98.2% (-99.3 to -95.8%) |
|                                            | Intracerebral haemorrhage               | 0.1% (0–0.2%)      | 0.3 (0.1–0.6)       | -98.9% (-99.6 to -97.3%) | 0.1% (0–0.2%)      | <0.1 (<0.1–<0.1) | -98.8% (-99.5 to -97.2%) |
|                                            | Subarachnoid haemorrhage                | 0.1% (0–0.2%)      | 0.1 (0–0.1)         | -98.4% (-99.4 to -96.2%) | 0.1% (0–0.2%)      | <0.1 (<0.1–<0.1) | -98.5% (-99.5 to -96.2%) |
| Kidney dysfunction                         | Stroke                                  | 11.9% (8.6–14.7%)  | 111.6 (78.4–152.8)  | -35.6% (-49.2 to -20.8%) | 10.9% (6.5–15.1%)  | 5.8 (3.3–8.6)    | -33% (-50.7 to -14.4%)   |
|                                            | Ischaemic stroke                        | 13% (8.5–17%)      | 80.1 (50.8–112.6)   | -26.5% (-42.4 to -10.1%) | 10.7% (4.6–16%)    | 4 (1.7–6.6)      | -26.4% (-49.5 to -5.9%)  |
|                                            | Intracerebral haemorrhage               | 11.9% (9.3–14.5%)  | 31.6 (22.6–42.2)    | -50.9% (-62.8 to -35.3%) | 13.4% (9.3–17.2%)  | 1.8 (1.2–2.5)    | -44.4% (-58.4 to -27.4%) |
| Lead exposure                              | Stroke                                  | 2.2% (0.7–3.9%)    | 20.3 (6.2–38.2)     | -61.6% (-70.9 to -52.2%) | 2.3% (0.8–4%)      | 1.2 (0.4–2.3)    | -52.3% (-62.7 to -39.3%) |
|                                            | Ischaemic stroke                        | 2.2% (0.7–3.9%)    | 13.2 (4.2–24.8)     | -50.6% (-62.2 to -39.5%) | 2.2% (0.8–4%)      | 0.8 (0.3–1.6)    | -41.9% (-55.6 to -26%)   |
|                                            | Intracerebral haemorrhage               | 2.3% (0.6–4.4%)    | 6 (1.6–12.6)        | -73.7% (-82.1 to -64.7%) | 2.6% (0.8–4.9%)    | 0.3 (0.1–0.7)    | -66.3% (-75.6 to -54.8%) |
|                                            | Subarachnoid haemorrhage                | 1.8% (0.4–3.7%)    | 1.1 (0.2–2.5)       | -67% (-82 to -50.7%)     | 2.4% (0.7–4.5%)    | 0.1 (0–0.1)      | -58.6% (-76.1 to -37%)   |
| Low birth weight                           | Meningitis                              | 1.6% (1.1–2.2%)    | 0.3 (0.2–0.4)       | -88% (-93.4 to -78.4%)   | 0.8% (0.5–1.1%)    | <0.1 (<0.1–<0.1) | -88% (-93.4 to -78.4%)   |
|                                            | Encephalitis                            | 0.9% (0.6–1.4%)    | 0.1 (0.1–0.2)       | -49.7% (-77.5 to 2%)     | 0.6% (0.4–0.9%)    | <0.1 (<0.1–<0.1) | -49.7% (-77.5 to 2%)     |
| Low birth weight and short gestation       | Meningitis                              | 1.7% (1.2–2.4%)    | 0.3 (0.2–0.5)       | -88.1% (-93.5 to -78.8%) | 0.9% (0.6–1.2%)    | <0.1 (<0.1–<0.1) | -88.1% (-93.5 to -78.8%) |
|                                            | Encephalitis                            | 1% (0.6–1.6%)      | 0.1 (0.1–0.2)       | -49.5% (-77.1 to 2%)     | 0.6% (0.4–1%)      | <0.1 (<0.1–<0.1) | -49.5% (-77.1 to 2%)     |
| Low physical activity                      | Stroke                                  | 6% (1.3–12.3%)     | 56.4 (12.5–117.5)   | -38.3% (-49.3 to -22.7%) | 7.6% (1.8–14.5%)   | 4 (1–8)          | -36% (-49.2 to -17.9%)   |
|                                            | Ischaemic stroke                        | 9.2% (2.1–18.8%)   | 56.4 (12.5–117.5)   | -38.3% (-49.3 to -22.7%) | 10.7% (2.5–20.4%)  | 4 (1–8)          | -36% (-49.2 to -17.9%)   |
| Low temperature                            | Stroke                                  | 2.4% (-1.6–5.8%)   | 22.3 (-14.1–56.6)   |                          | 2.9% (-1.9–7.1%)   | 1.5 (-1–4)       |                          |
|                                            | Ischaemic stroke                        | 2.2% (-1.5–5.5%)   | 13.8 (-8.8–35.3)    |                          | 2.9% (-1.9–7.1%)   | 1.1 (-0.7–2.8)   |                          |

**Table S16** Regional and national disabilities and deaths related to neurological conditions attributable to risk factors in North Africa and Middle East countries

| Location<br>Risk factor (alphabetic order) | Cause                     | DALYs (95% UI)     |                     |                          | Deaths (95% UI)    |                  |                          |
|--------------------------------------------|---------------------------|--------------------|---------------------|--------------------------|--------------------|------------------|--------------------------|
|                                            |                           | PAF (%)            | Rate per 100,000    | Rate change (%)          | PAF (%)            | Rate per 100,000 | Rate change (%)          |
|                                            |                           | 2019               | 2019                | From 1990 to 2019        | 2019               | 2019             | From 1990 to 2019        |
| Metabolic risk factors†                    | Intracerebral haemorrhage | 2.6% (-1.8–6.4%)   | 6.9 (4.5–17.7)      |                          | 2.9% (-1.9–7.1%)   | 0.4 (-0.2–1)     |                          |
|                                            | Subarachnoid haemorrhage  | 2.5% (-1.7–6.3%)   | 1.6 (-1.4–2)        |                          | 2.9% (-1.9–7.1%)   | 0.1 (0–0.2)      |                          |
|                                            | Stroke                    | 75.3% (67.7–83.1%) | 709.2 (584–883.9)   | -51.3% (-60.6 to -40.6%) | 71.5% (60.8–83.3%) | 37.8 (29.2–49.2) | -48.5% (-59.3 to -35.8%) |
|                                            | Ischaemic stroke          | 74.9% (64.6–86.1%) | 459.8 (367.6–584.1) | -43.5% (-54 to -32%)     | 70.6% (56.8–86.5%) | 26.5 (19.9–36.1) | -41.7% (-54.1 to -27.7%) |
|                                            | Intracerebral haemorrhage | 77.7% (70.2–84.4%) | 205.8 (163.4–260.3) | -63.1% (-71.4 to -52.4%) | 74.2% (63.6–83.5%) | 9.7 (7.5–12.7)   | -60.9% (-70.1 to -49.1%) |
|                                            | Subarachnoid haemorrhage  | 69.6% (62.6–76.2%) | 43.7 (32.8–62.6)    | -48.5% (-65.5 to -25.5%) | 70% (60.1–79.2%)   | 1.5 (1.1–2.4)    | -49.8% (-68 to -26.4%)   |
|                                            | Neurological disorders*   | 11.9% (4.2–24.9%)  | 163.8 (51.4–416.8)  | 28.5% (9.2 to 56%)       | 27.9% (11.4–46.8%) | 10.9 (1.9–32.9)  | 28.2% (6.1 to 62.2%)     |
| Non-optimal temperature                    | Stroke                    | 5.8% (2.9–3%)      | 54.8 (18–95.4)      | -52.8% (-69.2 to -33%)   | 7.1% (2.5–11.4%)   | 3.8 (1.2–6.6)    | -44.6% (-65 to -23.2%)   |
|                                            | Ischaemic stroke          | 5.5% (1.9–8.9%)    | 33.9 (11–59.4)      | -43.8% (-63.7 to -21.6%) | 7.1% (2.5–11.4%)   | 2.7 (0.9–4.7)    | -37.1% (-60.3 to -11.9%) |
| Other environmental risks                  | Intracerebral haemorrhage | 6.4% (2.2–10.3%)   | 17 (5.6–29.5)       | -63.4% (-76.1 to -45.5%) | 7.1% (2.5–11.4%)   | 0.9 (0.3–1.6)    | -58.3% (-72.1 to -39.5%) |
|                                            | Subarachnoid haemorrhage  | 6.2% (2.1–10.1%)   | 3.9 (1.2–7.2)       | -58.1% (-75.1 to -33.9%) | 7.1% (2.5–11.4%)   | 0.2 (0–0.3)      | -49.4% (-71 to -20.3%)   |
|                                            | Stroke                    | 2.2% (0.7–3.9%)    | 20.3 (6.2–38.2)     | -61.6% (-70.9 to -52.2%) | 2.3% (0.8–4%)      | 1.2 (0.4–2.3)    | -52.3% (-62.7 to -39.3%) |
|                                            | Ischaemic stroke          | 2.2% (0.7–3.9%)    | 13.2 (4.2–24.8)     | -50.6% (-62.2 to -39.5%) | 2.2% (0.8–4%)      | 0.8 (0.3–1.6)    | -41.9% (-55.6 to -26%)   |
| Particulate matter pollution               | Intracerebral haemorrhage | 2.3% (0.6–4.4%)    | 6 (1.6–12.6)        | -73.7% (-82.1 to -64.7%) | 2.6% (0.8–4.9%)    | 0.3 (0.1–0.7)    | -66.3% (-75.6 to -54.8%) |
|                                            | Subarachnoid haemorrhage  | 1.8% (0.4–3.7%)    | 1.1 (0.2–2.5)       | -67% (-82 to -50.7%)     | 2.4% (0.7–4.5%)    | 0.1 (0–0.1)      | -58.6% (-76.1 to -37%)   |
|                                            | Meningitis                | 0.4% (0.2–0.7%)    | 0.1 (0–0.1)         | -88.8% (-95.5 to -71.5%) | 0.2% (0.1–0.3%)    | <0.1 (<0.1–<0.1) | -88.8% (-95.5 to -71.5%) |
|                                            | Encephalitis              | 0.2% (0.1–0.4%)    | <0.1 (<0.1–<0.1)    | -52.7% (-83.4 to 28.6%)  | 0.1% (0.1–0.3%)    | <0.1 (<0.1–<0.1) | -52.8% (-83.4 to 28.6%)  |
| Secondhand smoke                           | Stroke                    | 32.4% (28–36.5%)   | 305.3 (242.7–382.6) | -54.8% (-63.5 to -43.6%) | 27.7% (23.9–31.5%) | 14.6 (11.4–19.4) | -53.1% (-63.3 to -40.9%) |
|                                            | Ischaemic stroke          | 30.8% (26.7–34.9%) | 189.2 (151.9–238.4) | -46.7% (-56.8 to -35%)   | 26.3% (22.6–30.1%) | 9.9 (7.7–13.2)   | -45.9% (-58.5 to -31.7%) |
|                                            | Intracerebral haemorrhage | 35.5% (30.8–39.8%) | 94.1 (73.7–121.5)   | -65.9% (-73.8 to -55.2%) | 30.7% (26.6–34.9%) | 4 (3.1–5.3)      | -64.7% (-73.1 to -53.1%) |
|                                            | Subarachnoid haemorrhage  | 35.1% (30.6–39.3%) | 22 (16.3–31.6)      | -51.5% (-67.1 to -30.5%) | 32.5% (28.2–36.5%) | 0.7 (0.5–1.1)    | -53.2% (-70 to -29.4%)   |
|                                            | Stroke                    | 2.9% (2.2–3.6%)    | 27.4 (19.4–37.8)    | -60% (-68.5 to -48.1%)   | 2.5% (1.9–3.2%)    | 1.3 (0.9–1.9)    | -57.6% (-67.2 to -44.5%) |
|                                            | Ischaemic stroke          | 2.6% (1.9–3.3%)    | 15.8 (11.3–22.1)    | -52.6% (-62.3 to -39.9%) | 2.3% (1.7–3%)      | 0.9 (0.6–1.3)    | -50.9% (-62 to -35.9%)   |
|                                            | Intracerebral haemorrhage | 3.5% (2.7–4.4%)    | 9.3 (6.5–12.6)      | -68.9% (-76.5 to -58.3%) | 2.9% (2.2–3.7%)    | 0.4 (0.3–0.5)    | -67.6% (-75.2 to -56.7%) |
| Short gestation                            | Subarachnoid haemorrhage  | 3.6% (2.7–4.5%)    | 2.2 (1.5–3.3)       | -55.9% (-70.1 to -37%)   | 3.2% (2.5–4.1%)    | 0.1 (0–0.1)      | -56.9% (-72.3 to -36.6%) |
|                                            | Meningitis                | 1.3% (0.9–1.8%)    | 0.2 (0.2–0.4)       | -85.9% (-92.3 to -75.1%) | 0.6% (0.4–0.9%)    | <0.1 (<0.1–<0.1) | -85.9% (-92.3 to -75.1%) |
| Smoking                                    | Encephalitis              | 0.8% (0.5–1.2%)    | 0.1 (0.1–0.1)       | -40% (-72.8 to 20.7%)    | 0.5% (0.3–0.8%)    | <0.1 (<0.1–<0.1) | -40% (-72.8 to 20.7%)    |
|                                            | Stroke                    | 11.2% (9.6–13.1%)  | 105 (82.9–135.7)    | -66.2% (-74.3 to -55.7%) | 8.1% (6.9–9.6%)    | 4.3 (3.3–5.9)    | -66% (-74.9 to -55.1%)   |
|                                            | Ischaemic stroke          | 10.2% (8.7–12%)    | 62.4 (49.4–80.6)    | -59.4% (-68.8 to -47.6%) | 7.2% (6–8.6%)      | 2.7 (2.1–3.8)    | -59.3% (-69.9 to -46.4%) |
|                                            | Intracerebral haemorrhage | 13% (11.1–15.2%)   | 34.4 (26.5–45.8)    | -74.8% (-81.6 to -65.6%) | 10.1% (8.6–12%)    | 1.3 (1–1.8)      | -74.8% (-81.8 to -65%)   |
|                                            | Subarachnoid haemorrhage  | 13.1% (10.7–15.8%) | 8.2 (5.6–12.5)      | -60.5% (-75.1 to -38%)   | 11.8% (9.5–14.2%)  | 0.3 (0.2–0.4)    | -62.8% (-78.2 to -40.3%) |

**Table S16** Regional and national disabilities and deaths related to neurological conditions attributable to risk factors in North Africa and Middle East countries

| Location<br>Risk factor (alphabetic order) | Cause                                   | DALYs (95% UI)     |                          |                           | Deaths (95% UI)    |                         |                           |
|--------------------------------------------|-----------------------------------------|--------------------|--------------------------|---------------------------|--------------------|-------------------------|---------------------------|
|                                            |                                         | PAF (%)            | Rate per 100,000         | Rate change (%)           | PAF (%)            | Rate per 100,000        | Rate change (%)           |
|                                            |                                         | 2019               | 2019                     | From 1990 to 2019         | 2019               | 2019                    | From 1990 to 2019         |
| Tobacco                                    | Neurological disorders*                 | 4.3% (1.5–9.3%)    | 59.1 (19.5–147.6)        | -12.4% (-30.3 to 15.9%)   | 8.6% (2.3–14.9%)   | 3.5 (0.4–10.6)          | -9.7% (-32.4 to 44.4%)    |
|                                            | Alzheimer's disease and other dementias | 16.2% (9.7–22.5%)  | 65 (24.5–154.3)          | -16.5% (-33.8 to 6.7%)    | 14.3% (8.5–20.3%)  | 3.9 (0.8–11)            | -13.3% (-34.4 to 12.4%)   |
|                                            | Parkinson's disease                     | -8.2% (-12.5–4.4%) | -7.3 (-11.8–3.6)         | -38.3% (-57.6 to -11.6%)  | -7.4% (-11.4–3.8%) | -0.4 (-0.7–0.2)         | -34.2% (-56.4 to -4.9%)   |
|                                            | Multiple sclerosis                      | 10.7% (7.7–13.9%)  | 1.3 (0.8–2)              | -4.7% (-30 to 22.4%)      | 11.1% (7.6–14.6%)  | <0.1 (<0.1–<0.1)        | -25.6% (-60.1 to 10%)     |
|                                            | Stroke                                  | 13.7% (12.1–15.6%) | 128.9 (103.8–164)        | -64.9% (-72.6 to -55.1%)  | 10.4% (9–11.9%)    | 5.5 (4.3–7.5)           | -64.1% (-72.6 to -53.7%)  |
|                                            | Ischaemic stroke                        | 12.4% (10.9–14.3%) | 76.4 (61.8–97.5)         | -57.9% (-67.1 to -47%)    | 9.3% (7.9–10.7%)   | 3.5 (2.7–4.8)           | -57.4% (-67.9 to -44.3%)  |
|                                            | Intracerebral haemorrhage               | 16% (14.1–18.3%)   | 42.4 (32.7–54.9)         | -73.6% (-80.2 to -64.5%)  | 12.7% (11.1–14.6%) | 1.7 (1.3–2.2)           | -73.4% (-80.1 to -63.3%)  |
|                                            | Subarachnoid haemorrhage                | 16.1% (13.7–18.8%) | 10.1 (7.1–15.2)          | -59.4% (-74 to -37.6%)    | 14.6% (12.3–17%)   | 0.3 (0.2–0.5)           | -61.5% (-77 to -39.3%)    |
|                                            | Neurological disorders*                 | 4.3% (1.5–9.3%)    | 59.1 (19.5–147.6)        | -12.4% (-30.3 to 15.9%)   | 8.6% (2.3–14.9%)   | 3.5 (0.4–10.6)          | -9.7% (-32.4 to 44.4%)    |
|                                            | Alzheimer's disease and other dementias | 16.2% (9.7–22.5%)  | 65 (24.5–154.3)          | -16.5% (-33.8 to 6.7%)    | 14.3% (8.5–20.3%)  | 3.9 (0.8–11)            | -13.3% (-34.4 to 12.4%)   |
| Parkinson's disease                        | -8.2% (-12.5–4.4%)                      | -7.3 (-11.8–3.6)   | -38.3% (-57.6 to -11.6%) | -7.4% (-11.4–3.8%)        | -0.4 (-0.7–0.2)    | -34.2% (-56.4 to -4.9%) |                           |
| Multiple sclerosis                         | 10.7% (7.7–13.9%)                       | 1.3 (0.8–2)        | -4.7% (-30 to 22.4%)     | 11.1% (7.6–14.6%)         | <0.1 (<0.1–<0.1)   | -25.6% (-60.1 to 10%)   |                           |
| <b>Egypt</b>                               |                                         |                    |                          |                           |                    |                         |                           |
| Air pollution                              | Meningitis                              | 2.2% (1.4–1%)      | 1.2 (0.5–2.5)            | -83.7% (-94.2 to -63.3%)  | 1.6% (0.7–3.1%)    | <0.1 (<0.1–<0.1)        | -83.7% (-94.2 to -63.3%)  |
|                                            | Encephalitis                            | 1.6% (0.5–3.3%)    | 1 (0.2–2.4)              | -29.8% (-76.3 to 74%)     | 1.2% (0.3–2.7%)    | <0.1 (<0.1–<0.1)        | -29.8% (-76.3 to 74%)     |
|                                            | Stroke                                  | 34.3% (29.1–38.6%) | 734.1 (528.3–1009.9)     | -14.4% (-34.7 to 10%)     | 32.5% (27.7–36.7%) | 27.9 (19.3–40)          | -15.7% (-38.2 to 12%)     |
|                                            | Ischaemic stroke                        | 35.3% (30.1–39.5%) | 487.6 (355.3–656.1)      | 32.7% (-2.5 to 67.6%)     | 31.9% (27.2–36%)   | 19.9 (13.8–28.2)        | 22.9% (-13.3 to 62.4%)    |
|                                            | Intracerebral haemorrhage               | 33.5% (28–38.9%)   | 215.8 (143.8–324.5)      | -48.4% (-64.2 to -26.5%)  | 34.7% (29.8–39.1%) | 7.2 (4.7–11)            | -51.3% (-67 to -29%)      |
| Alcohol use                                | Subarachnoid haemorrhage                | 26.9% (19.9–35%)   | 30.7 (20–44.9)           | -57.5% (-74.9 to -23.3%)  | 31% (24.9–36.5%)   | 0.9 (0.5–1.3)           | -60.6% (-78 to -22.4%)    |
|                                            | Stroke                                  | 0.1% (-0.1–0.4%)   | 2.4 (-2.6–8.9)           | -55.1% (-397.6 to 223.5%) | 0.1% (-0.1–0.3%)   | 0 (-0.1–0.2)            | -69.3% (-538.7 to 272.6%) |
|                                            | Ischaemic stroke                        | -0.1% (-0.4–0.1%)  | -1.6 (-5.1–2)            | 27.1% (-456.2 to 547.2%)  | -0.1% (-0.3–0.1%)  | -0.1 (-0.2–0.1)         | 18.1% (-398.4 to 531.7%)  |
|                                            | Intracerebral haemorrhage               | 0.6% (0.1–1.3%)    | 4 (0.6–8.9)              | -39.5% (-80 to 68.6%)     | 0.6% (0.1–1.1%)    | 0.1 (0–0.3)             | -43% (-80.9 to 66.5%)     |
|                                            | Neurological disorders*                 | 0.1% (0–0.2%)      | 1 (0.3–2.4)              | -3.5% (-66.4 to 165%)     | 0% (0–0.1%)        | <0.1 (<0.1–<0.1)        | -6.6% (-52.2 to 82.5%)    |
| All risk factors                           | Idiopathic epilepsy                     | 1% (0.4–1.7%)      | 1 (0.3–2.4)              | -3.5% (-66.4 to 165%)     | 1.4% (0.6–2.4%)    | <0.1 (<0.1–<0.1)        | -6.6% (-52.2 to 82.5%)    |
|                                            | Meningitis                              | 9.5% (4.7–16.6%)   | 5.2 (2.1–9.9)            | -83.9% (-93.8 to -65.2%)  | 6.9% (3.2–12.5%)   | 0.1 (0–0.1)             | -83.9% (-93.8 to -65.2%)  |
|                                            | Encephalitis                            | 6.8% (2.2–13.8%)   | 4.4 (0.8–10.1)           | -29.6% (-73 to 62.2%)     | 5.1% (1.3–10.6%)   | <0.1 (<0.1–0.1)         | -29.6% (-73 to 62.2%)     |
|                                            | Stroke                                  | 82% (76.6–87%)     | 1755 (1315–2369.7)       | -9.2% (-30.9 to 17.3%)    | 84.4% (79.3–89.3%) | 72.4 (51.3–101.5)       | -9.3% (-33.7 to 21.7%)    |
|                                            | Ischaemic stroke                        | 86.4% (81.7–90.8%) | 1194.4 (912.6–1589.3)    | 37.5% (1.1 to 75.1%)      | 85.4% (79.4–91.9%) | 53.2 (37.7–74)          | 27.9% (-8.9 to 69.3%)     |
|                                            | Intracerebral haemorrhage               | 76.3% (68.7–83.9%) | 491.4 (342.9–709.9)      | -45.5% (-61.8 to -23.7%)  | 83.1% (78.4–87.8%) | 17.2 (11.8–26)          | -48.4% (-65.2 to -25%)    |
|                                            | Subarachnoid haemorrhage                | 60.4% (48.4–74.1%) | 69.2 (46.9–98.9)         | -57.6% (-74.8 to -23.6%)  | 72.5% (63.4–81.7%) | 2 (1.3–2.9)             | -58.6% (-76.6 to -19.8%)  |
| Neurological disorders*                    | 11.5% (4.4–23.7%)                       | 150.8 (55.3–362.5) | 38.7% (15.7 to 70.7%)    | 27.7% (11.9–43.1%)        | 9.5 (1.7–27.8)     | 39.4% (9.4 to 80.6%)    |                           |

**Table S16** Regional and national disabilities and deaths related to neurological conditions attributable to risk factors in North Africa and Middle East countries

| Location<br>Risk factor (alphabetic order) | Cause                                   | DALYs (95% UI)       |                     |                          | Deaths (95% UI)    |                  |                          |
|--------------------------------------------|-----------------------------------------|----------------------|---------------------|--------------------------|--------------------|------------------|--------------------------|
|                                            |                                         | PAF (%)              | Rate per 100,000    | Rate change (%)          | PAF (%)            | Rate per 100,000 | Rate change (%)          |
|                                            |                                         | 2019                 | 2019                | From 1990 to 2019        | 2019               | 2019             | From 1990 to 2019        |
| Ambient particulate matter pollution       | Alzheimer's disease and other dementias | 43.8% (30.4–57.3%)   | 158.8 (63.2–371.8)  | 39% (15.6 to 70.9%)      | 42.6% (29.4–55.8%) | 10 (2.2–28.2)    | 39.6% (10.5 to 80.1%)    |
|                                            | Parkinson's disease                     | -10.7% (-16.1–-5.5%) | -10.5 (-17.2–-5.1)  | 36.2% (0.6 to 80.7%)     | -9.9% (-15–-5%)    | -0.6 (-1–0.3)    | 42.1% (1.1 to 92.7%)     |
|                                            | Idiopathic epilepsy                     | 1% (0.4–1.7%)        | 1 (0.3–2.4)         | -3.5% (-66.4 to 165%)    | 1.4% (0.6–2.4%)    | <0.1 (<0.1–<0.1) | -6.6% (-52.2 to 82.5%)   |
|                                            | Multiple sclerosis                      | 10.3% (3.6–17.8%)    | 1.5 (0.8–3.3)       | 30.4% (-7 to 67.5%)      | 12.1% (4.1–20.6%)  | <0.1 (<0.1–0.1)  | 26.3% (-22 to 86.5%)     |
|                                            | Meningitis                              | 2.2% (1.4–1.9%)      | 1.2 (0.5–2.5)       | -80.5% (-93.1 to -54%)   | 1.6% (0.7–3.1%)    | <0.1 (<0.1–<0.1) | -80.5% (-93.1 to -53.9%) |
|                                            | Encephalitis                            | 1.6% (0.5–3.3%)      | 1 (0.2–2.4)         | -16% (-71.4 to 116.5%)   | 1.2% (0.3–2.7%)    | <0.1 (<0.1–<0.1) | -16% (-71.4 to 116.6%)   |
|                                            | Stroke                                  | 34.3% (29.1–38.6%)   | 733.5 (527.3–1009)  | -0.7% (-24.8 to 32.4%)   | 32.5% (27.7–36.7%) | 27.9 (19.2–39.9) | -2.1% (-28.5 to 35.2%)   |
|                                            | Ischaemic stroke                        | 35.2% (30–39.5%)     | 487.2 (354.9–655.6) | 54.1% (14 to 103.2%)     | 31.9% (27.2–36%)   | 19.9 (13.8–28.1) | 42.8% (1.6 to 93.8%)     |
|                                            | Intracerebral haemorrhage               | 33.5% (28–38.8%)     | 215.6 (143.7–324.3) | -40.2% (-58.8 to -12.4%) | 34.6% (29.8–39.1%) | 7.2 (4.7–11)     | -43.5% (-62.3 to -15.7%) |
| Behavioural risk factors‡                  | Subarachnoid haemorrhage                | 26.8% (19.9–35%)     | 30.7 (20–44.9)      | -50.6% (-71.1 to -8.9%)  | 31% (24.8–36.5%)   | 0.9 (0.5–1.3)    | -54.2% (-74.7 to -9.3%)  |
|                                            | Meningitis                              | 9.2% (4.5–16%)       | 5 (2.1–9.6)         | -83.7% (-93.7 to -65.1%) | 6.7% (3.1–12%)     | 0.1 (0–0.1)      | -83.7% (-93.7 to -65%)   |
|                                            | Encephalitis                            | 6.6% (2.2–13.4%)     | 4.3 (0.8–9.7)       | -28.8% (-72.2 to 63.4%)  | 4.9% (1.3–10.2%)   | <0.1 (<0.1–0.1)  | -28.8% (-72.2 to 63.4%)  |
|                                            | Stroke                                  | 29.2% (24.5–35%)     | 626.7 (445.5–906.2) | -10.9% (-32.9 to 16.4%)  | 28.3% (23.2–34.2%) | 24.3 (16.6–36.6) | -11.7% (-35.4 to 18.2%)  |
|                                            | Ischaemic stroke                        | 32.1% (25.8–39%)     | 443.6 (309.6–630.1) | 33.2% (-4 to 72.5%)      | 29.7% (23–37.3%)   | 18.5 (12.3–27.7) | 22.8% (-14.7 to 62.7%)   |
|                                            | Intracerebral haemorrhage               | 25% (20–30.7%)       | 161.4 (106–249.7)   | -49.4% (-65.4 to -26.8%) | 25% (20.3–30.4%)   | 5.2 (3.3–8.3)    | -52.4% (-68.7 to -30.2%) |
|                                            | Subarachnoid haemorrhage                | 18.9% (13.9–26%)     | 21.7 (13.6–34)      | -58.1% (-75.1 to -21.7%) | 21.6% (16.9–27.5%) | 0.6 (0.4–1)      | -61% (-78 to -24%)       |
|                                            | Neurological disorders*                 | 5.2% (1.7–11.4%)     | 68.6 (22.3–171.1)   | 35.1% (10.9 to 63.3%)    | 12.6% (3.3–21.2%)  | 4.4 (0.5–13.4)   | 40.5% (6.5 to 83.6%)     |
|                                            | Alzheimer's disease and other dementias | 21.2% (13.7–27.8%)   | 76.6 (30.5–179.4)   | 36.1% (12 to 65.5%)      | 21.1% (13.4–28.2%) | 5 (1.1–14.1)     | 40.8% (9.5 to 81.1%)     |
| Child and maternal malnutrition            | Parkinson's disease                     | -10.7% (-16.1–-5.5%) | -10.5 (-17.2–-5.1)  | 36.2% (0.6 to 80.7%)     | -9.9% (-15–-5%)    | -0.6 (-1–0.3)    | 42.1% (1.1 to 92.7%)     |
|                                            | Idiopathic epilepsy                     | 1% (0.4–1.7%)        | 1 (0.3–2.4)         | -3.5% (-66.4 to 165%)    | 1.4% (0.6–2.4%)    | <0.1 (<0.1–<0.1) | -6.6% (-52.2 to 82.5%)   |
|                                            | Multiple sclerosis                      | 10.3% (3.6–17.8%)    | 1.5 (0.8–3.3)       | 30.4% (-7 to 67.5%)      | 12.1% (4.1–20.6%)  | <0.1 (<0.1–0.1)  | 26.3% (-22 to 86.5%)     |
|                                            | Meningitis                              | 9.2% (4.5–16%)       | 5 (2.1–9.6)         | -83.7% (-93.7 to -65.1%) | 6.7% (3.1–12%)     | 0.1 (0–0.1)      | -83.7% (-93.7 to -65%)   |
|                                            | Encephalitis                            | 6.6% (2.2–13.4%)     | 4.3 (0.8–9.7)       | -28.8% (-72.2 to 63.4%)  | 4.9% (1.3–10.2%)   | <0.1 (<0.1–0.1)  | -28.8% (-72.2 to 63.4%)  |
| Diet high in red meat                      | Stroke                                  | 4.2% (1.6–6.2%)      | 89.6 (32.9–150.7)   | 8% (-33.1 to 78.2%)      | 3.4% (1.3–5.1%)    | 2.9 (1–5.1)      | 4.1% (-38.3 to 67%)      |
|                                            | Ischaemic stroke                        | 4% (0.7–6.1%)        | 55.1 (8.5–96)       | 80% (30 to 167.1%)       | 3% (0.5–4.7%)      | 1.9 (0.3–3.4)    | 64.3% (13.5 to 140.9%)   |
|                                            | Intracerebral haemorrhage               | 4.6% (0.7–7.4%)      | 29.9 (4.7–56.8)     | -32.3% (-55.9 to 11.7%)  | 4.4% (0.7–7%)      | 0.9 (0.1–1.8)    | -36.1% (-59.7 to 5.3%)   |
|                                            | Subarachnoid haemorrhage                | 4% (0.6–6.9%)        | 4.5 (0.7–8.4)       | -44.3% (-67.3 to 17.8%)  | 4.1% (0.7–6.8%)    | 0.1 (0–0.2)      | -48.6% (-71.7 to 12.6%)  |
| Diet high in sodium                        | Stroke                                  | 1.8% (0.2–7.2%)      | 39.6 (4.7–160.3)    | -12.2% (-50.7 to 56.9%)  | 1.7% (0.3–6.7%)    | 1.5 (0.2–6.1)    | -13.5% (-51.7 to 53.8%)  |
|                                            | Ischaemic stroke                        | 1.8% (0.2–7.4%)      | 25.2 (3.2–106.2)    | 38.6% (-26.7 to 152%)    | 1.6% (0.3–6.4%)    | 1 (0.1–4.3)      | 30.1% (-31.3 to 123.6%)  |
|                                            | Intracerebral haemorrhage               | 2% (0.2–7.7%)        | 12.7 (1.2–51.3)     | -45.3% (-71.4 to 9.1%)   | 2% (0.2–7.9%)      | 0.4 (0–1.8)      | -48.5% (-74.3 to -4.2%)  |
|                                            | Subarachnoid haemorrhage                | 1.5% (0.2–5.8%)      | 1.7 (0.2–7.1)       | -53.6% (-78 to 10.9%)    | 1.8% (0.2–7.1%)    | <0.1 (<0.1–0.2)  | -57% (-80.2 to 6.9%)     |

**Table S16** Regional and national disabilities and deaths related to neurological conditions attributable to risk factors in North Africa and Middle East countries

| Location<br>Risk factor (alphabetic order) | Cause                                   | DALYs (95% UI)     |                      |                          | Deaths (95% UI)    |                  |                          |
|--------------------------------------------|-----------------------------------------|--------------------|----------------------|--------------------------|--------------------|------------------|--------------------------|
|                                            |                                         | PAF (%)            | Rate per 100,000     | Rate change (%)          | PAF (%)            | Rate per 100,000 | Rate change (%)          |
|                                            |                                         | 2019               | 2019                 | From 1990 to 2019        | 2019               | 2019             | From 1990 to 2019        |
| Diet low in fibre                          | Stroke                                  | 0.4% (0.2–0.7%)    | 7.5 (3.9–15.4)       | -55.6% (-70.2 to -21.1%) | 0.4% (0.2–0.7%)    | 0.3 (0.2–0.6)    | -55% (-72.1 to -18.9%)   |
|                                            | Ischaemic stroke                        | 0.4% (0.2–0.7%)    | 5 (2.7–9.7)          | -29.1% (-53.6 to 20.4%)  | 0.4% (0.2–0.6%)    | 0.2 (0.1–0.4)    | -34.6% (-59.6 to 14.9%)  |
|                                            | Intracerebral haemorrhage               | 0.3% (0.2–0.7%)    | 2.2 (1–5.1)          | -73.6% (-83.7 to -51.5%) | 0.4% (0.2–0.7%)    | 0.1 (0–0.2)      | -74.8% (-84.9 to -53.1%) |
|                                            | Subarachnoid haemorrhage                | 0.3% (0.1–0.7%)    | 0.3 (0.1–0.8)        | -78.5% (-87.9 to -51.8%) | 0.3% (0.2–0.7%)    | <0.1 (<0.1–<0.1) | -79.1% (-88.1 to -49.6%) |
| Diet low in fruits                         | Stroke                                  | 2.5% (1.2–4.1%)    | 54.3 (24–97)         | -59.5% (-75.1 to -34.6%) | 2% (0.9–3.4%)      | 1.8 (0.8–3.2)    | -62.5% (-78.1 to -38.9%) |
|                                            | Ischaemic stroke                        | 2% (0.4–4%)        | 28.2 (5.6–59.1)      | -33.2% (-59.3 to 13.8%)  | 1.6% (0.4–3.2%)    | 1 (0.2–2.2)      | -39.9% (-65.4 to 6.2%)   |
|                                            | Intracerebral haemorrhage               | 3.5% (1.7–5.9%)    | 22.4 (9.8–42.8)      | -71.1% (-83.2 to -51.7%) | 3.2% (1.6–5.2%)    | 0.7 (0.3–1.3)    | -74.6% (-85.5 to -55.6%) |
|                                            | Subarachnoid haemorrhage                | 3.2% (1.5–5.7%)    | 3.7 (1.6–7.2)        | -73.9% (-86.8 to -49.4%) | 3.2% (1.6–5.4%)    | 0.1 (0–0.2)      | -77.9% (-89.1 to -54%)   |
| Diet low in vegetables                     | Stroke                                  | 0.2% (0.2–0.2%)    | 4 (3–5.3)            | -56.1% (-80.7 to -8.4%)  | 0.2% (0.2–0.3%)    | 0.2 (0.1–0.3)    | -60.6% (-81 to -15.1%)   |
|                                            | Ischaemic stroke                        | 0.2% (0.2–0.2%)    | 2.8 (2.1–3.7)        | -35.5% (-69.2 to 39.4%)  | 0.2% (0.2–0.3%)    | 0.1 (0.1–0.2)    | -45.8% (-73.8 to 27.6%)  |
|                                            | Intracerebral haemorrhage               | 0.2% (0.1–0.2%)    | 1 (0.7–1.5)          | -74.2% (-91.7 to -35%)   | 0.2% (0.2–0.3%)    | <0.1 (<0.1–0.1)  | -77.9% (-92.5 to -39%)   |
|                                            | Subarachnoid haemorrhage                | 0.1% (0.1–0.2%)    | 0.1 (0.1–0.2)        | -79.1% (-93.9 to -32.4%) | 0.2% (0.1–0.2%)    | <0.1 (<0.1–<0.1) | -81.5% (-94.3 to -34.7%) |
| Diet low in whole grains                   | Stroke                                  | 3.4% (0.8–5%)      | 71.7 (17.5–120.5)    | 30.4% (-7.1 to 66.8%)    | 3.1% (0.8–4.7%)    | 2.7 (0.7–4.7)    | 19.7% (-15.3 to 58.6%)   |
|                                            | Ischaemic stroke                        | 5.2% (1.3–7.6%)    | 71.7 (17.5–120.5)    | 30.4% (-7.1 to 66.8%)    | 4.3% (1.1–6.4%)    | 2.7 (0.7–4.7)    | 19.7% (-15.3 to 58.6%)   |
| Dietary risks                              | Stroke                                  | 11.7% (7.4–17%)    | 250.3 (145.1–390.7)  | -22.1% (-46.7 to 6.3%)   | 10.3% (6.5–15.3%)  | 8.9 (5–15)       | -25.6% (-51.1 to 3.6%)   |
|                                            | Ischaemic stroke                        | 12.7% (7.2–18.1%)  | 175.7 (93.6–280.9)   | 20.2% (-18.1 to 60.8%)   | 10.6% (6.1–15.5%)  | 6.6 (3.4–11.1)   | 8.5% (-27.8 to 47.7%)    |
|                                            | Intracerebral haemorrhage               | 10.1% (5.1–15.7%)  | 64.8 (29.8–117.3)    | -56.4% (-73.3 to -33.4%) | 9.7% (5–15.5%)     | 2 (0.9–3.7)      | -60.2% (-77.2 to -37.7%) |
|                                            | Subarachnoid haemorrhage                | 8.6% (4.3–13.8%)   | 9.9 (4.6–17.1)       | -62.9% (-79.3 to -31.7%) | 9.1% (4.7–14.3%)   | 0.3 (0.1–0.5)    | -66.8% (-83 to -33.1%)   |
| Environmental/occupational risk factors§   | Meningitis                              | 2.2% (1–4.1%)      | 1.2 (0.5–2.5)        | -83.7% (-94.2 to -63.3%) | 1.6% (0.7–3.1%)    | <0.1 (<0.1–<0.1) | -83.7% (-94.2 to -63.3%) |
|                                            | Encephalitis                            | 1.6% (0.5–3.3%)    | 1 (0.2–2.4)          | -29.8% (-76.3 to 74%)    | 1.2% (0.3–2.7%)    | <0.1 (<0.1–<0.1) | -29.8% (-76.3 to 74%)    |
|                                            | Stroke                                  | 41% (35.7–45.5%)   | 878.3 (641.4–1202.4) | -18% (-37.5 to 6.1%)     | 40.4% (35.6–44.9%) | 34.7 (24.4–49.4) | -15.6% (-37.5 to 13.5%)  |
|                                            | Ischaemic stroke                        | 42.1% (36.7–46.6%) | 581.6 (429.9–792.3)  | 30.6% (-3.9 to 65.8%)    | 39.8% (34.9–44.4%) | 24.8 (17.4–35)   | 24% (-12.2 to 64.1%)     |
|                                            | Intracerebral haemorrhage               | 40.2% (34.3–45.9%) | 259 (180.6–384.3)    | -50.6% (-65 to -30.8%)   | 42.4% (37.2–46.9%) | 8.8 (5.8–13.5)   | -51.8% (-67.3 to -30.2%) |
|                                            | Subarachnoid haemorrhage                | 33% (25.4–41.7%)   | 37.7 (25.2–54.9)     | -63.1% (-77.4 to -33.2%) | 38.3% (31.7–44.7%) | 1.1 (0.7–1.6)    | -62.4% (-78.4 to -28.5%) |
| High body-mass index                       | Stroke                                  | 38.7% (27.8–47.8%) | 829 (545.9–1208.4)   | 6.9% (-21.9 to 44.8%)    | 29.1% (20–38%)     | 25 (14.9–38.6)   | 7.7% (-25.1 to 51.4%)    |
|                                            | Ischaemic stroke                        | 33.9% (23.4–43.5%) | 468.8 (302.7–687.4)  | 95.1% (39.5 to 167.3%)   | 24.2% (15.6–32.9%) | 15 (8.8–23.6)    | 88.8% (27.4 to 175.1%)   |
|                                            | Intracerebral haemorrhage               | 48.6% (36.6–59.5%) | 312.7 (200.2–475.2)  | -30.3% (-52.5 to 5.4%)   | 42.7% (30.8–53.8%) | 8.8 (5.4–14)     | -32.5% (-55.8 to 5.5%)   |
|                                            | Subarachnoid haemorrhage                | 41.5% (29.4–53.9%) | 47.5 (29.4–72.4)     | -44.9% (-68.4 to 4.8%)   | 40.1% (28.9–51.4%) | 1.1 (0.6–1.8)    | -48.4% (-72.1 to 4.1%)   |
|                                            | Neurological disorders*                 | 5.5% (1.6–12.4%)   | 71.1 (19–174)        | 44.7% (9.7 to 120%)      | 12.9% (4.1–24.5%)  | 4.3 (0.6–13)     | 42.2% (-1.8 to 135.4%)   |
|                                            | Alzheimer's disease and other dementias | 19.6% (8.3–34.3%)  | 71.1 (19–174)        | 44.7% (9.7 to 120%)      | 18.3% (7.3–32.6%)  | 4.3 (0.6–13)     | 42.2% (-1.8 to 135.4%)   |
| High fasting plasma glucose                | Stroke                                  | 24.6% (15–39.5%)   | 526.7 (295.2–920.9)  | 132.5% (50.4 to 233.2%)  | 27.6% (16.1–47.9%) | 23.8 (12.2–44.2) | 107.1% (31.9 to 205.1%)  |
|                                            | Ischaemic stroke                        | 28.1% (14.3–50.5%) | 388.9 (186.9–733.8)  | 219.1% (105.1 to 359.6%) | 28.9% (14.1–57.3%) | 18.1 (7.8–37.5)  | 170% (74.2 to 313.4%)    |



**Table S16** Regional and national disabilities and deaths related to neurological conditions attributable to risk factors in North Africa and Middle East countries

| Location<br>Risk factor (alphabetic order) | Cause                                   | DALYs (95% UI)     |                       |                          | Deaths (95% UI)    |                  |                          |
|--------------------------------------------|-----------------------------------------|--------------------|-----------------------|--------------------------|--------------------|------------------|--------------------------|
|                                            |                                         | PAF (%)            | Rate per 100,000      | Rate change (%)          | PAF (%)            | Rate per 100,000 | Rate change (%)          |
|                                            |                                         | 2019               | 2019                  | From 1990 to 2019        | 2019               | 2019             | From 1990 to 2019        |
|                                            | Intracerebral haemorrhage               | 19.2% (11–29.8%)   | 124 (62.6–227.7)      | 35.8% (-15.2 to 110.3%)  | 24.8% (14.4–38.5%) | 5.2 (2.5–10)     | 22.4% (-26 to 91.8%)     |
|                                            | Subarachnoid haemorrhage                | 12.1% (6.7–19.2%)  | 13.8 (6.9–24)         | 3% (-46.1 to 116.4%)     | 19.5% (11.5–31%)   | 0.5 (0.3–1)      | -4.5% (-51.1 to 112.2%)  |
|                                            | Neurological disorders*                 | 3% (0.5–8.4%)      | 38.5 (6.7–124.7)      | 93.9% (59.1 to 165.6%)   | 7.3% (1.4–17.2%)   | 2.5 (0.3–9.4)    | 89.3% (45.4 to 171.5%)   |
|                                            | Alzheimer's disease and other dementias | 10.6% (2.5–22.9%)  | 38.5 (6.7–124.7)      | 93.9% (59.1 to 165.6%)   | 10.4% (2.4–22.6%)  | 2.5 (0.3–9.4)    | 89.3% (45.4 to 171.5%)   |
| High LDL cholesterol                       | Stroke                                  | 15.3% (9.7–23.9%)  | 325.4 (192.5–531.1)   | 46.2% (9.2 to 91%)       | 14.3% (6.6–27.3%)  | 12.2 (5.3–23.6)  | 32.1% (-4 to 85.1%)      |
|                                            | Ischaemic stroke                        | 23.6% (15.1–37%)   | 325.4 (192.5–531.1)   | 46.2% (9.2 to 91%)       | 19.7% (9–37.8%)    | 12.2 (5.3–23.6)  | 32.1% (-4 to 85.1%)      |
| High systolic blood pressure               | Stroke                                  | 49.9% (42–56.6%)   | 1068.5 (757.4–1481.4) | 3.2% (-24.4 to 37.1%)    | 49.2% (40–57.2%)   | 42.2 (28.2–61.3) | -1.6% (-32.8 to 37.4%)   |
|                                            | Ischaemic stroke                        | 51% (40.9–59.5%)   | 704.8 (490.5–973.7)   | 59% (13.3 to 113.7%)     | 47.6% (36.4–58.2%) | 29.7 (19.3–43.6) | 43.4% (-2.2 to 100.7%)   |
|                                            | Intracerebral haemorrhage               | 49.7% (40.8–58.6%) | 320.2 (216.6–473)     | -37.1% (-57.2 to -8.3%)  | 54.3% (44.9–63.2%) | 11.3 (7.4–17.1)  | -42.2% (-62.4 to -13.4%) |
|                                            | Subarachnoid haemorrhage                | 38% (27.4–50.2%)   | 43.5 (28.5–64.7)      | -47.8% (-69.6 to -3.3%)  | 47% (36.8–57.8%)   | 1.3 (0.8–2)      | -52.6% (-74.4 to -4.8%)  |
| High temperature                           | Stroke                                  | 1.8% (0.3–4.6%)    | 39.7 (5.6–100.1)      | -13.3% (-80.4 to 86.7%)  | 2.1% (0.3–5.3%)    | 1.8 (0.3–4.7)    | 10.9% (-74.5 to 142.7%)  |
|                                            | Ischaemic stroke                        | 1.8% (0.2–4.4%)    | 24.4 (3.5–61.4)       | 59.1% (-65.7 to 265.1%)  | 2.1% (0.3–5.3%)    | 1.3 (0.2–3.4)    | 65.2% (-61.4 to 269.3%)  |
|                                            | Intracerebral haemorrhage               | 2% (0.3–5%)        | 13 (1.8–33.2)         | -43.7% (-88.1 to 24.3%)  | 2.1% (0.3–5.3%)    | 0.4 (0.1–1.2)    | -37.1% (-87.8 to 36.2%)  |
|                                            | Subarachnoid haemorrhage                | 2% (0.3–4.9%)      | 2.3 (0.3–5.8)         | -69% (-93.4 to -17.6%)   | 2.1% (0.3–5.3%)    | 0.1 (0–0.1)      | -58.6% (-90.1 to 0.5%)   |
| Household air pollution from solid fuels   | Meningitis                              | 0% (0–0%)          | <0.1 (<0.1–<0.1)      | -99.9% (-100 to -99.7%)  | 0% (0–0%)          | <0.1 (<0.1–<0.1) | -99.9% (-100 to -99.7%)  |
|                                            | Encephalitis                            | 0% (0–0%)          | <0.1 (<0.1–<0.1)      | -99.6% (-99.9 to -98.6%) | 0% (0–0%)          | <0.1 (<0.1–<0.1) | -99.6% (-99.9 to -98.6%) |
|                                            | Stroke                                  | 0% (0–0.1%)        | 0.6 (0.2–1.4)         | -99.5% (-99.8 to -98.7%) | 0% (0–0.1%)        | <0.1 (<0.1–0.1)  | -99.5% (-99.8 to -98.8%) |
|                                            | Ischaemic stroke                        | 0% (0–0.1%)        | 0.4 (0.1–0.9)         | -99.2% (-99.7 to -98.1%) | 0% (0–0.1%)        | <0.1 (<0.1–<0.1) | -99.3% (-99.7 to -98.2%) |
|                                            | Intracerebral haemorrhage               | 0% (0–0.1%)        | 0.2 (0.1–0.4)         | -99.7% (-99.9 to -99.2%) | 0% (0–0.1%)        | <0.1 (<0.1–<0.1) | -99.7% (-99.9 to -99.3%) |
|                                            | Subarachnoid haemorrhage                | 0% (0–0.1%)        | <0.1 (<0.1–0.1)       | -99.7% (-99.9 to -99.3%) | 0% (0–0.1%)        | <0.1 (<0.1–<0.1) | -99.8% (-99.9 to -99.3%) |
| Kidney dysfunction                         | Stroke                                  | 11.1% (8.9–13.4%)  | 237.5 (167.1–335.2)   | 34.9% (0.4 to 75.2%)     | 11.7% (8.4–14.9%)  | 10 (6.3–15.1)    | 30.1% (-8 to 75.7%)      |
|                                            | Ischaemic stroke                        | 13.3% (10.2–16.4%) | 184.5 (127.2–262.2)   | 87.6% (37.8 to 138.1%)   | 12.5% (8.2–16.5%)  | 7.8 (4.7–12)     | 77.9% (23.9 to 136.8%)   |
|                                            | Intracerebral haemorrhage               | 8.2% (6.4–10.3%)   | 53 (33.6–83)          | -31.9% (-53.4 to -1.3%)  | 10.8% (8.3–13.3%)  | 2.2 (1.4–3.6)    | -32.7% (-55.3 to 0.8%)   |
| Lead exposure                              | Stroke                                  | 5.5% (3.5–7.7%)    | 118.1 (65.7–186.6)    | -25.9% (-45.2 to -2.3%)  | 6% (3.9–8.3%)      | 5.2 (2.9–8.3)    | -16.7% (-40.8 to 13.3%)  |
|                                            | Ischaemic stroke                        | 5.8% (3.7–8.2%)    | 80.6 (45.7–126.7)     | 25.7% (-9.4 to 61.9%)    | 6% (3.8–8.3%)      | 3.7 (2–6)        | 31.1% (-10.2 to 74.3%)   |
|                                            | Intracerebral haemorrhage               | 5.2% (3.7–8%)      | 33.4 (17.2–58.7)      | -59.3% (-72.9 to -41.2%) | 6.4% (3.9–9.1%)    | 1.3 (0.7–2.3)    | -55.6% (-70.3 to -34.9%) |
|                                            | Subarachnoid haemorrhage                | 3.5% (1.8–5.9%)    | 4.1 (1.9–7.6)         | -69.5% (-82.7 to -41.9%) | 5.2% (3.7–8%)      | 0.1 (0.1–0.3)    | -65.4% (-80.7 to -31%)   |
| Low birth weight                           | Meningitis                              | 8.9% (4.4–15.5%)   | 4.8 (2.9–3)           | -83.7% (-93.7 to -64.6%) | 6.4% (3–11.7%)     | 0.1 (0–0.1)      | -83.7% (-93.7 to -64.6%) |
|                                            | Encephalitis                            | 6.3% (2.1–12.9%)   | 4.1 (0.7–9.4)         | -29% (-72.3 to 64.3%)    | 4.7% (1.2–9.9%)    | <0.1 (<0.1–0.1)  | -29% (-72.3 to 64.3%)    |
| Low birth weight and short gestation       | Meningitis                              | 9.2% (4.5–16%)     | 5 (2.1–9.6)           | -83.7% (-93.7 to -65.1%) | 6.7% (3.1–12%)     | 0.1 (0–0.1)      | -83.7% (-93.7 to -65%)   |
|                                            | Encephalitis                            | 6.6% (2.2–13.4%)   | 4.3 (0.8–9.7)         | -28.8% (-72.2 to 63.4%)  | 4.9% (1.3–10.2%)   | <0.1 (<0.1–0.1)  | -28.8% (-72.2 to 63.4%)  |
| Low physical activity                      | Stroke                                  | 4.7% (1–10.8%)     | 100 (17.4–238.4)      | 35.8% (-1.8 to 74.6%)    | 6.2% (1.3–13.1%)   | 5.3 (1.1–12.2)   | 22.8% (-12.6 to 63.7%)   |



**Table S16** Regional and national disabilities and deaths related to neurological conditions attributable to risk factors in North Africa and Middle East countries

| Location<br>Risk factor (alphabetic order) | Cause                                   | DALYs (95% UI)     |                        |                          | Deaths (95% UI)          |                  |                          |
|--------------------------------------------|-----------------------------------------|--------------------|------------------------|--------------------------|--------------------------|------------------|--------------------------|
|                                            |                                         | PAF (%)            | Rate per 100,000       | Rate change (%)          | PAF (%)                  | Rate per 100,000 | Rate change (%)          |
|                                            |                                         | 2019               | 2019                   | From 1990 to 2019        | 2019                     | 2019             | From 1990 to 2019        |
| Low temperature                            | Ischaemic stroke                        | 7.2% (1.5–16.7%)   | 100 (17.4–238.4)       | 35.8% (-1.8 to 74.6%)    | 8.6% (1.8–18%)           | 5.3 (1.1–12.2)   | 22.8% (-12.6 to 63.7%)   |
|                                            | Stroke                                  | 3.5% (-0.1–7.6%)   | 75.6 (-1.8–172)        | -38.7% (-68.7 to -7.9%)  | 4.1% (-0.1–8.8%)         | 3.5 (-0.1–8.1)   | -21.5% (-61.8 to 17.9%)  |
| Metabolic risk factors†                    | Ischaemic stroke                        | 3.4% (-0.1–7.3%)   | 46.5 (-1.1–104.7)      | 12.6% (-47.3 to 65.6%)   | 4.1% (-0.1–8.8%)         | 2.5 (-0.1–5.9)   | 16.9% (-46.6 to 71%)     |
|                                            | Intracerebral haemorrhage               | 3.9% (-0.1–8.3%)   | 24.7 (-0.6–57.8)       | -60.2% (-80.5 to -37.7%) | 4.1% (-0.1–8.8%)         | 0.8 (0–2)        | -55.5% (-78.2 to -30.5%) |
|                                            | Subarachnoid haemorrhage                | 3.7% (-0.1–8.1%)   | 4.3 (-0.1–9.8)         | -78.4% (-89.5 to -51%)   | 4.1% (-0.1–8.8%)         | 0.1 (0–0.3)      | -71% (-85.9 to -40.6%)   |
|                                            | Stroke                                  | 70.8% (63.6–77.6%) | 1516.3 (1124.2–2070.8) | 5.2% (-22 to 37.8%)      | 71% (62.6–79.8%)         | 60.9 (42–86.6)   | 2.6% (-26.9 to 38.9%)    |
|                                            | Ischaemic stroke                        | 74.6% (66.7–83.1%) | 1031.9 (775.4–1392.7)  | 55.3% (14.6 to 100.9%)   | 71.3% (60.9–83.8%)       | 44.4 (30.4–63.9) | 43.5% (1 to 93.9%)       |
|                                            | Intracerebral haemorrhage               | 66.2% (57.8–74.5%) | 426.5 (293–625.4)      | -36.1% (-56.1 to -8.2%)  | 71.5% (64.3–78.5%)       | 14.8 (9.7–22.6)  | -40.6% (-60.6 to -12.9%) |
|                                            | Subarachnoid haemorrhage                | 50.6% (38.1–64.2%) | 58 (37.8–85.4)         | -47.1% (-69.4 to -2.6%)  | 60.4% (50.2–70.6%)       | 1.7 (1–2.5)      | -51.2% (-73.2 to -2.2%)  |
|                                            | Neurological disorders*                 | 7.8% (2.4–16.9%)   | 101.9 (30.8–248.9)     | 54.1% (20.1 to 113.2%)   | 18.8% (7.1–33.6%)        | 6.3 (1.1–18.9)   | 51.8% (10.4 to 121.4%)   |
|                                            | Alzheimer's disease and other dementias | 28.1% (13.7–44.9%) | 101.9 (30.8–248.9)     | 54.1% (20.1 to 113.2%)   | 26.7% (12.6–43.3%)       | 6.3 (1.1–18.9)   | 51.8% (10.4 to 121.4%)   |
|                                            | Non-optimal temperature                 | Stroke             | 5.3% (2.4–8.9%)        | 113.9 (48.2–206.8)       | -32% (-56.3 to 7.9%)     | 6.1% (2.8–10.3%) | 5.3 (2.2–9.5)            |
| Other environmental risks                  | Ischaemic stroke                        | 5.1% (2.2–8.6%)    | 70.1 (29.2–125.6)      | 24.8% (-27.1 to 100%)    | 6.1% (2.8–10.3%)         | 3.8 (1.6–6.8)    | 29.7% (-29.3 to 101.6%)  |
|                                            | Intracerebral haemorrhage               | 5.8% (2.7–9.8%)    | 37.3 (15.7–68.7)       | -55.8% (-72.3 to -28.8%) | 6.1% (2.8–10.3%)         | 1.3 (0.5–2.4)    | -50.6% (-70.1 to -16%)   |
|                                            | Subarachnoid haemorrhage                | 5.6% (2.6–9.6%)    | 6.5 (2.6–12.1)         | -75.9% (-86.4 to -42.5%) | 6.1% (2.8–10.3%)         | 0.2 (0.1–0.3)    | -67.7% (-81.8 to -30.1%) |
|                                            | Stroke                                  | 5.5% (3.5–7.7%)    | 118.1 (65.7–186.6)     | -25.9% (-45.2 to -2.3%)  | 6% (3.9–8.3%)            | 5.2 (2.9–8.3)    | -16.7% (-40.8 to 13.3%)  |
|                                            | Ischaemic stroke                        | 5.8% (3.7–8.2%)    | 80.6 (45.7–126.7)      | 25.7% (-9.4 to 61.9%)    | 6% (3.8–8.3%)            | 3.7 (2–6)        | 31.1% (-10.2 to 74.3%)   |
|                                            | Intracerebral haemorrhage               | 5.2% (3–7.8%)      | 33.4 (17.2–58.7)       | -59.3% (-72.9 to -41.2%) | 6.4% (3.9–9.1%)          | 1.3 (0.7–2.3)    | -55.6% (-70.3 to -34.9%) |
|                                            | Subarachnoid haemorrhage                | 3.5% (1.8–5.9%)    | 4.1 (1.9–7.6)          | -69.5% (-82.7 to -41.9%) | 5.2% (3–7.8%)            | 0.1 (0.1–0.3)    | -65.4% (-80.7 to -31%)   |
|                                            | Particulate matter pollution            | Meningitis         | 2.2% (1–4.1%)          | 1.2 (0.5–2.5)            | -83.7% (-94.2 to -63.3%) | 1.6% (0.7–3.1%)  | <0.1 (<0.1–<0.1)         |
| Secondhand smoke                           | Encephalitis                            | 1.6% (0.5–3.3%)    | 1 (0.2–2.4)            | -29.8% (-76.3 to 74%)    | 1.2% (0.3–2.7%)          | <0.1 (<0.1–<0.1) | -29.8% (-76.3 to 74%)    |
|                                            | Stroke                                  | 34.3% (29.1–38.6%) | 734.1 (528.3–1009.9)   | -14.4% (-34.7 to 10%)    | 32.5% (27.7–36.7%)       | 27.9 (19.3–40)   | -15.7% (-38.2 to 12%)    |
|                                            | Ischaemic stroke                        | 35.3% (30.1–39.5%) | 487.6 (355.3–656.1)    | 32.7% (-2.5 to 67.6%)    | 31.9% (27.2–36%)         | 19.9 (13.8–28.2) | 22.9% (-13.3 to 62.4%)   |
|                                            | Intracerebral haemorrhage               | 33.5% (28–38.9%)   | 215.8 (143.8–324.5)    | -48.4% (-64.2 to -26.5%) | 34.7% (29.8–39.1%)       | 7.2 (4.7–11)     | -51.3% (-67 to -29%)     |
|                                            | Subarachnoid haemorrhage                | 26.9% (19.9–35%)   | 30.7 (20–44.9)         | -57.5% (-74.9 to -23.3%) | 31% (24.9–36.5%)         | 0.9 (0.5–1.3)    | -60.6% (-78 to -22.4%)   |
|                                            | Stroke                                  | 3.9% (2.9–4.9%)    | 83.2 (55.2–120.8)      | -26.4% (-46 to -3.5%)    | 3.5% (2.6–4.4%)          | 3 (1.9–4.4)      | -28% (-48.9 to -3.7%)    |
|                                            | Ischaemic stroke                        | 3.7% (2.8–4.7%)    | 51.5 (34–73.7)         | 20.5% (-13.7 to 56%)     | 3.2% (2.4–4.2%)          | 2 (1.3–3)        | 7.9% (-24.5 to 42.7%)    |
|                                            | Intracerebral haemorrhage               | 4.3% (3.1–5.5%)    | 27.4 (17.2–41.8)       | -53.7% (-68.6 to -33.6%) | 4.1% (3–5.3%)            | 0.9 (0.5–1.3)    | -56.4% (-71 to -36.2%)   |
|                                            | Subarachnoid haemorrhage                | 3.7% (2.4–5.2%)    | 4.2 (2.5–6.5)          | -61.9% (-78.9 to -28.3%) | 4% (2.8–5.3%)            | 0.1 (0.1–0.2)    | -64.7% (-81.1 to -30.1%) |
|                                            | Short gestation                         | Meningitis         | 6.9% (3.4–11.9%)       | 3.7 (1.6–7.2)            | -81.4% (-92.7 to -60.9%) | 5% (2.3–9%)      | <0.1 (<0.1–0.1)          |
| Smoking                                    | Encephalitis                            | 4.9% (1.6–10.1%)   | 3.2 (0.6–7.3)          | -17.5% (-68.3 to 86.9%)  | 3.7% (1.7–7%)            | <0.1 (<0.1–0.1)  | -17.5% (-68.3 to 86.9%)  |
|                                            | Stroke                                  | 13.1% (11.5–15.5%) | 282.2 (202.3–403.2)    | -2.4% (-28.3 to 32.1%)   | 11.8% (10.2–13.9%)       | 10.2 (6.9–15.2)  | -1.7% (-30.9 to 35.3%)   |

**Table S16** Regional and national disabilities and deaths related to neurological conditions attributable to risk factors in North Africa and Middle East countries

| Location         | Risk factor (alphabetic order) | Cause                                   | DALYs (95% UI)       |                       |                           | Deaths (95% UI)    |                      |                             |
|------------------|--------------------------------|-----------------------------------------|----------------------|-----------------------|---------------------------|--------------------|----------------------|-----------------------------|
|                  |                                |                                         | PAF (%)              | Rate per 100,000      | Rate change (%)           | PAF (%)            | Rate per 100,000     | Rate change (%)             |
|                  |                                |                                         | 2019                 | 2019                  | From 1990 to 2019         | 2019               | 2019                 | From 1990 to 2019           |
| Tobacco          |                                | Ischaemic stroke                        | 13.4% (11.5–15.6%)   | 186.4 (135.5–262.7)   | 53.2% (9.5 to 105.9%)     | 11.3% (9.6–13.3%)  | 7.1 (4.8–10.5)       | 48.9% (1.2 to 108%)         |
|                  |                                | Intracerebral haemorrhage               | 13.2% (10.4–16.2%)   | 85.7 (54.5–137.4)     | -41.7% (-62 to -12%)      | 13.4% (10.6–15.9%) | 2.8 (1.7–4.6)        | -43.7% (-64.6 to -14.5%)    |
|                  |                                | Subarachnoid haemorrhage                | 8.9% (6.5–13.1%)     | 10.2 (6.5–16.6)       | -50.5% (-71.9 to 2.4%)    | 10.8% (8.5–14%)    | 0.3 (0.2–0.5)        | -52.6% (-73.9 to 3.3%)      |
|                  |                                | Neurological disorders*                 | 5.1% (1.7–11.4%)     | 67.6 (21–170.4)       | 36% (12.5 to 64.8%)       | 12.5% (3.3–21.2%)  | 4.4 (0.5–13.4)       | 40.6% (6.5 to 83.6%)        |
|                  |                                | Alzheimer's disease and other dementias | 21.2% (13.7–27.8%)   | 76.6 (30.5–179.4)     | 36.1% (12 to 65.5%)       | 21.1% (13.4–28.2%) | 5 (1.1–14.1)         | 40.8% (9.5 to 81.1%)        |
|                  |                                | Parkinson's disease                     | -10.7% (-16.1–-5.5%) | -10.5 (-17.2–-5.1)    | 36.2% (0.6 to 80.7%)      | -9.9% (-15–-5%)    | -0.6 (-1–0.3)        | 42.1% (1.1 to 92.7%)        |
|                  |                                | Multiple sclerosis                      | 10.3% (3.6–17.8%)    | 1.5 (0.8–3.3)         | 30.4% (-7 to 67.5%)       | 12.1% (4.1–20.6%)  | <0.1 (<0.1–0.1)      | 26.3% (-22 to 86.5%)        |
|                  |                                | Stroke                                  | 16.6% (14.7–19%)     | 356 (258.6–499)       | -8.8% (-31.7 to 21.6%)    | 14.9% (13.2–16.9%) | 12.8 (9–18.8)        | -8.9% (-34.4 to 23.4%)      |
|                  |                                | Ischaemic stroke                        | 16.8% (14.8–19%)     | 232 (171–319.4)       | 45.1% (3.3 to 91.2%)      | 14.2% (12.4–16.3%) | 8.9 (6.2–12.8)       | 37.7% (-4.8 to 86.8%)       |
|                  |                                | Intracerebral haemorrhage               | 17% (14.1–20%)       | 109.9 (71.9–171.2)    | -45% (-63.2 to -19.6%)    | 17% (14.3–19.6%)   | 3.6 (2.3–5.6)        | -47.1% (-65.4 to -21.5%)    |
|                  |                                | Subarachnoid haemorrhage                | 12.2% (9.1–17.3%)    | 14 (9.1–22)           | -54.4% (-73.3 to -14.1%)  | 14.4% (11.8–17.6%) | 0.4 (0.2–0.6)        | -56.5% (-75.6 to -13%)      |
|                  |                                | Neurological disorders*                 | 5.1% (1.7–11.4%)     | 67.6 (21–170.4)       | 36% (12.5 to 64.8%)       | 12.5% (3.3–21.2%)  | 4.4 (0.5–13.4)       | 40.6% (6.5 to 83.6%)        |
|                  |                                | Alzheimer's disease and other dementias | 21.2% (13.7–27.8%)   | 76.6 (30.5–179.4)     | 36.1% (12 to 65.5%)       | 21.1% (13.4–28.2%) | 5 (1.1–14.1)         | 40.8% (9.5 to 81.1%)        |
|                  | Parkinson's disease            | -10.7% (-16.1–-5.5%)                    | -10.5 (-17.2–-5.1)   | 36.2% (0.6 to 80.7%)  | -9.9% (-15–-5%)           | -0.6 (-1–0.3)      | 42.1% (1.1 to 92.7%) |                             |
|                  | Multiple sclerosis             | 10.3% (3.6–17.8%)                       | 1.5 (0.8–3.3)        | 30.4% (-7 to 67.5%)   | 12.1% (4.1–20.6%)         | <0.1 (<0.1–0.1)    | 26.3% (-22 to 86.5%) |                             |
| <b>Iran</b>      |                                |                                         |                      |                       |                           |                    |                      |                             |
| Air pollution    |                                | Meningitis                              | 0.8% (0.6–1%)        | 0.3 (0.2–0.4)         | -85.4% (-91.3 to -76.8%)  | 0.4% (0.3–0.5%)    | <0.1 (<0.1–<0.1)     | -85.4% (-91.3 to -76.8%)    |
|                  |                                | Encephalitis                            | 0.6% (0.2–0.9%)      | 0.1 (0–0.2)           | -9.6% (-51.9 to 45%)      | 0.4% (0.2–0.5%)    | <0.1 (<0.1–<0.1)     | -9.6% (-51.9 to 45%)        |
|                  |                                | Stroke                                  | 25.8% (22.8–29%)     | 325.8 (281.7–373.3)   | -48.3% (-53.6 to -40.5%)  | 22% (19.3–24.9%)   | 14.5 (12.3–16.8)     | -49.2% (-54.8 to -40%)      |
|                  |                                | Ischaemic stroke                        | 25.2% (22.2–28.4%)   | 248 (213–286.4)       | -45.9% (-52 to -38.1%)    | 21.4% (18.7–24.2%) | 11.7 (9.8–13.6)      | -47% (-54 to -37.7%)        |
|                  |                                | Intracerebral haemorrhage               | 27.8% (24.5–31.1%)   | 62.1 (54.1–70.3)      | -54.9% (-61.8 to -46.9%)  | 24.6% (21.7–27.7%) | 2.3 (2–2.6)          | -55.5% (-62.5 to -46.3%)    |
|                  |                                | Subarachnoid haemorrhage                | 28.8% (25.4–32.2%)   | 15.7 (13.3–18.9)      | -54.7% (-67.3 to -31.4%)  | 25.1% (22–28.5%)   | 0.5 (0.4–0.6)        | -60.6% (-73.5 to -35.6%)    |
| Alcohol use      |                                | Stroke                                  | 0.5% (0.3–0.7%)      | 6.4 (3.9–9.3)         | 197.8% (20 to 2297.6%)    | 0.3% (0.2–0.5%)    | 0.2 (0.1–0.3)        | 251.4% (-2312.6 to 2759.2%) |
|                  |                                | Ischaemic stroke                        | 0.3% (0.1–0.5%)      | 2.8 (0.9–5)           | 526.6% (-6564 to 4368.7%) | 0.2% (0.1–0.4%)    | 0.1 (0–0.2)          | 1095% (-4274.9 to 5545.1%)  |
|                  |                                | Intracerebral haemorrhage               | 1.6% (1.1–2.3%)      | 3.6 (2.4–5.2)         | 110.5% (29.8 to 388.7%)   | 1.2% (0.8–1.8%)    | 0.1 (0.1–0.2)        | 108.8% (25.3 to 411%)       |
| All risk factors |                                | Neurological disorders*                 | 0.2% (0.1–0.4%)      | 2.5 (1.5–4)           | 204.6% (90.2 to 478.2%)   | 0.1% (0–0.2%)      | <0.1 (<0.1–<0.1)     | 157.9% (66.6 to 398.7%)     |
|                  |                                | Idiopathic epilepsy                     | 1.8% (1.2–2.6%)      | 2.5 (1.5–4)           | 204.6% (90.2 to 478.2%)   | 2.2% (1.4–3.2%)    | <0.1 (<0.1–<0.1)     | 157.9% (66.6 to 398.7%)     |
|                  |                                | Meningitis                              | 4.4% (3.3–5.5%)      | 1.7 (1.2–2.3)         | -86.4% (-91.5 to -79.4%)  | 2.4% (1.7–3.1%)    | <0.1 (<0.1–<0.1)     | -86.4% (-91.5 to -79.4%)    |
|                  |                                | Encephalitis                            | 3.7% (1.5–5%)        | 0.6 (0.2–0.9)         | -15.8% (-53.7 to 28.2%)   | 2.2% (1–3%)        | <0.1 (<0.1–<0.1)     | -15.8% (-53.7 to 28.2%)     |
|                  |                                | Stroke                                  | 84.9% (80.8–89.7%)   | 1072.1 (972.6–1165.2) | -43.9% (-49.4 to -35.4%)  | 82.5% (76.5–90%)   | 54.7 (47.4–61.1)     | -43.6% (-49.3 to -33.2%)    |

**Table S16** Regional and national disabilities and deaths related to neurological conditions attributable to risk factors in North Africa and Middle East countries

| Location<br>Risk factor (alphabetic order) | Cause                                   | DALYs (95% UI)            |                     |                          | Deaths (95% UI)          |                    |                          |
|--------------------------------------------|-----------------------------------------|---------------------------|---------------------|--------------------------|--------------------------|--------------------|--------------------------|
|                                            |                                         | PAF (%)                   | Rate per 100,000    | Rate change (%)          | PAF (%)                  | Rate per 100,000   | Rate change (%)          |
|                                            |                                         | 2019                      | 2019                | From 1990 to 2019        | 2019                     | 2019               | From 1990 to 2019        |
| Ambient particulate matter pollution       | Ischaemic stroke                        | 85.6% (80.7–91.4%)        | 842.3 (754–927.8)   | -41.4% (-46.9 to -32.8%) | 82.6% (75.4–91.5%)       | 45.3 (38.9–51.5)   | -41.3% (-47.6 to -30.5%) |
|                                            | Intracerebral haemorrhage               | 83.1% (79.4–86.6%)        | 185.4 (172.5–198.3) | -51.1% (-58.3 to -42.4%) | 82.4% (77–87.5%)         | 7.7 (6.9–8.4)      | -50.9% (-58.4 to -40.2%) |
|                                            | Subarachnoid haemorrhage                | 81.2% (77.2–85.1%)        | 44.3 (38.8–51.3)    | -53.8% (-67.2 to -29.1%) | 80% (73.7–85.9%)         | 1.7 (1.4–2)        | -59.2% (-73 to -32.7%)   |
|                                            | Neurological disorders*                 | 10.1% (4.1–20%)           | 138.8 (51.8–339.6)  | 32% (14.6 to 63.3%)      | 24.4% (12.1–38.7%)       | 8.4 (1.7–25.8)     | 35.3% (15.7 to 89.6%)    |
|                                            | Alzheimer's disease and other dementias | 35.8% (22.9–50.6%)        | 138.3 (51.8–336.3)  | 28.7% (11.3 to 59.1%)    | 34% (21.2–48.9%)         | 8.6 (1.9–25.9)     | 33% (12.9 to 84%)        |
|                                            | Parkinson's disease                     | -6.4% (-9.8–3.2%)         | -4.9 (-7.6–2.4)     | -20.8% (-40.1 to 4.9%)   | -5.4% (-8.3–2.6%)        | -0.3 (-0.4–0.1)    | -15.9% (-38.2 to 15.3%)  |
|                                            | Idiopathic epilepsy                     | 1.8% (1.2–2.6%)           | 2.5 (1.5–4)         | 204.6% (90.2 to 478.2%)  | 2.2% (1.4–3.2%)          | <0.1 (<0.1–<0.1)   | 157.9% (66.6 to 398.7%)  |
|                                            | Multiple sclerosis                      | 9.8% (7.2–13.5%)          | 2.9 (1.9–4.7)       | -6.3% (-34.1 to 15%)     | 10.4% (7.4–14.7%)        | <0.1 (<0.1–0.1)    | 0.1% (-40.7 to 40%)      |
|                                            | Meningitis                              | 0.8% (0.5–1%)             | 0.3 (0.2–0.4)       | -80.7% (-88.8 to -68.2%) | 0.4% (0.3–0.5%)          | <0.1 (<0.1–<0.1)   | -80.7% (-88.8 to -68.2%) |
|                                            | Encephalitis                            | 0.6% (0.2–0.9%)           | 0.1 (0–0.2)         | 13.4% (-39.4 to 91.2%)   | 0.4% (0.2–0.5%)          | <0.1 (<0.1–<0.1)   | 13.4% (-39.4 to 91.2%)   |
|                                            | Stroke                                  | 25.8% (22.8–29%)          | 325 (280.7–372.7)   | -37.6% (-46 to -24.3%)   | 21.9% (19.2–24.8%)       | 14.5 (12.3–16.8)   | -38.6% (-47 to -24.6%)   |
|                                            | Ischaemic stroke                        | 25.1% (22.2–28.4%)        | 247.5 (212.2–285.6) | -34.4% (-42.9 to -21%)   | 21.3% (18.7–24.2%)       | 11.7 (9.8–13.6)    | -35.8% (-45.2 to -21.3%) |
|                                            | Behavioural risk factors‡               | Intracerebral haemorrhage | 27.7% (24.4–31%)    | 61.9 (54.1–70.2)         | -45.7% (-54.8 to -32.7%) | 24.6% (21.6–27.6%) | 2.3 (2–2.6)              |
| Subarachnoid haemorrhage                   |                                         | 28.7% (25.3–32.2%)        | 15.7 (13.3–18.9)    | -46.9% (-62.3 to -18.7%) | 25.1% (22–28.5%)         | 0.5 (0.4–0.6)      | -54.1% (-69.6 to -24.5%) |
| Meningitis                                 |                                         | 4.3% (3.2–5.3%)           | 1.6 (1.2–2.2)       | -86.3% (-91.5 to -79.3%) | 2.3% (1.7–2.9%)          | <0.1 (<0.1–<0.1)   | -86.3% (-91.5 to -79.3%) |
| Encephalitis                               |                                         | 3.5% (1.4–4.8%)           | 0.6 (0.2–0.8)       | -15.2% (-53.5 to 28.8%)  | 2.1% (1–2.9%)            | <0.1 (<0.1–<0.1)   | -15.2% (-53.5 to 28.8%)  |
| Stroke                                     |                                         | 31.2% (26.4–36.7%)        | 394.4 (327.4–474.9) | -51.6% (-57.7 to -44.3%) | 27.8% (22.5–34%)         | 18.4 (14.7–23)     | -50.9% (-58.1 to -42.1%) |
| Ischaemic stroke                           |                                         | 32.6% (26.7–39.3%)        | 320.5 (259.7–395.6) | -48.7% (-55.3 to -41.5%) | 28.8% (22.8–36.2%)       | 15.8 (12.3–20.2)   | -48.3% (-55.6 to -39.1%) |
| Intracerebral haemorrhage                  |                                         | 26.9% (22.8–31.8%)        | 60 (50.4–71.6)      | -60.8% (-67.2 to -53.2%) | 22.8% (19.1–27.8%)       | 2.1 (1.7–2.6)      | -61.6% (-68 to -53.1%)   |
| Subarachnoid haemorrhage                   |                                         | 25.6% (21.3–30.9%)        | 14 (11.2–17.7)      | -62.1% (-73.9 to -40.9%) | 21.7% (17.8–26.8%)       | 0.5 (0.4–0.6)      | -66.9% (-78.3 to -45%)   |
| Neurological disorders*                    |                                         | 3.4% (1.3–6.8%)           | 46.4 (17.8–106.5)   | -6.2% (-19.8 to 16%)     | 6.7% (2.5–10.9%)         | 2.4 (0.4–7)        | -7.8% (-24.2 to 25.9%)   |
| Alzheimer's disease and other dementias    |                                         | 11.9% (7.4–16.7%)         | 46 (17.5–104.7)     | -11.3% (-24.8 to 7.2%)   | 10.1% (6–14.2%)          | 2.5 (0.6–7.1)      | -9.2% (-25.6 to 17.5%)   |
| Parkinson's disease                        |                                         | -6.4% (-9.8–3.2%)         | -4.9 (-7.6–2.4)     | -20.8% (-40.1 to 4.9%)   | -5.4% (-8.3–2.6%)        | -0.3 (-0.4–0.1)    | -15.9% (-38.2 to 15.3%)  |
| Idiopathic epilepsy                        |                                         | 1.8% (1.2–2.6%)           | 2.5 (1.5–4)         | 204.6% (90.2 to 478.2%)  | 2.2% (1.4–3.2%)          | <0.1 (<0.1–<0.1)   | 157.9% (66.6 to 398.7%)  |
| Multiple sclerosis                         |                                         | 9.8% (7.2–13.5%)          | 2.9 (1.9–4.7)       | -6.3% (-34.1 to 15%)     | 10.4% (7.4–14.7%)        | <0.1 (<0.1–0.1)    | 0.1% (-40.7 to 40%)      |
| Child and maternal malnutrition            | Meningitis                              | 4.3% (3.2–5.3%)           | 1.6 (1.2–2.2)       | -86.3% (-91.5 to -79.3%) | 2.3% (1.7–2.9%)          | <0.1 (<0.1–<0.1)   | -86.3% (-91.5 to -79.3%) |
|                                            | Encephalitis                            | 3.5% (1.4–4.8%)           | 0.6 (0.2–0.8)       | -15.2% (-53.5 to 28.8%)  | 2.1% (1–2.9%)            | <0.1 (<0.1–<0.1)   | -15.2% (-53.5 to 28.8%)  |
|                                            | Stroke                                  | 3.2% (1.1–4.9%)           | 40.9 (14.1–63.5)    | -55.3% (-64.5 to -47.5%) | 2.5% (0.8–3.8%)          | 1.6 (0.6–2.6)      | -54.7% (-64 to -45.7%)   |
| Diet high in red meat                      | Ischaemic stroke                        | 3% (0.5–4.7%)             | 29.5 (5.1–47.4)     | -52.7% (-63.7 to -44.7%) | 2.3% (0.4–3.6%)          | 1.2 (0.2–2)        | -52.1% (-63.1 to -42.2%) |
|                                            | Intracerebral haemorrhage               | 4% (0.6–6.5%)             | 9 (1.4–14.7)        | -60.8% (-70.5 to -53%)   | 3.4% (0.5–5.5%)          | 0.3 (0–0.5)        | -60.6% (-70.5 to -51.6%) |
|                                            | Subarachnoid haemorrhage                | 4.2% (0.7–6.8%)           | 2.3 (0.4–3.8)       | -60.3% (-73 to -40.1%)   | 3.4% (0.5–5.5%)          | 0.1 (0–0.1)        | -65.3% (-77.5 to -44%)   |

**Table S16** Regional and national disabilities and deaths related to neurological conditions attributable to risk factors in North Africa and Middle East countries

| Location<br>Risk factor (alphabetic order) | Cause                     | DALYs (95% UI)     |                     |                          | Deaths (95% UI)    |                  |                          |
|--------------------------------------------|---------------------------|--------------------|---------------------|--------------------------|--------------------|------------------|--------------------------|
|                                            |                           | PAF (%)            | Rate per 100,000    | Rate change (%)          | PAF (%)            | Rate per 100,000 | Rate change (%)          |
|                                            |                           | 2019               | 2019                | From 1990 to 2019        | 2019               | 2019             | From 1990 to 2019        |
| Diet high in sodium                        | Stroke                    | 1.9% (0.3–7.3%)    | 23.9 (4.1–93.4)     | -46.5% (-59.5 to -25.2%) | 1.6% (0.3–6.1%)    | 1 (0.2–4.1)      | -47.1% (-60.5 to -27.2%) |
|                                            | Ischaemic stroke          | 1.8% (0.3–6.9%)    | 17.6 (3.2–69.3)     | -43.9% (-58.3 to -22.5%) | 1.5% (0.3–5.7%)    | 0.8 (0.2–3.2)    | -44.6% (-60.6 to -24.4%) |
|                                            | Intracerebral haemorrhage | 2.3% (0.3–8.8%)    | 5.1 (0.7–19.4)      | -52.4% (-63.9 to -29.7%) | 2% (0.3–7.9%)      | 0.2 (0–0.7)      | -53.2% (-64.9 to -32.7%) |
|                                            | Subarachnoid haemorrhage  | 2.2% (0.3–8.5%)    | 1.2 (0.2–4.5)       | -52.9% (-70.3 to -18.7%) | 2% (0.3–7.6%)      | <0.1 (<0.1–0.2)  | -58.4% (-75.5 to -25.9%) |
| Diet low in fibre                          | Stroke                    | 1.4% (0.4–2.9%)    | 18.1 (4.6–36.7)     | -71% (-76.7 to -63.1%)   | 1.3% (0.4–2.7%)    | 0.9 (0.2–1.7)    | -69.1% (-76.2 to -58.6%) |
|                                            | Ischaemic stroke          | 1.4% (0.4–2.8%)    | 13.6 (3.5–27.3)     | -69.4% (-75.3 to -60.7%) | 1.3% (0.4–2.6%)    | 0.7 (0.2–1.4)    | -67.2% (-74.9 to -56%)   |
|                                            | Intracerebral haemorrhage | 1.6% (0.4–3.2%)    | 3.5 (0.8–7.2)       | -74.9% (-80.3 to -67.4%) | 1.5% (0.4–3%)      | 0.1 (0–0.3)      | -74% (-79.8 to -65.3%)   |
|                                            | Subarachnoid haemorrhage  | 1.7% (0.4–3.4%)    | 0.9 (0.2–1.9)       | -75.5% (-83.6 to -61%)   | 1.5% (0.4–3.1%)    | <0.1 (<0.1–0.1)  | -78.1% (-85.9 to -62.5%) |
| Diet low in fruits                         | Stroke                    | 1.7% (0.8–2.8%)    | 21.7 (9.8–35.7)     | -62.9% (-71.1 to -54%)   | 1.3% (0.6–2.2%)    | 0.9 (0.4–1.5)    | -64.2% (-73.8 to -52.7%) |
|                                            | Ischaemic stroke          | 1.4% (0.4–2.7%)    | 14 (3.7–25.9)       | -60.2% (-69.2 to -48.3%) | 1.1% (0.3–2.1%)    | 0.6 (0.2–1.2)    | -61.4% (-72.4 to -45.8%) |
|                                            | Intracerebral haemorrhage | 2.7% (1.4–4.5%)    | 6.1 (3–10.2)        | -66.9% (-74.1 to -58%)   | 2.2% (1.1–3.8%)    | 0.2 (0.1–0.3)    | -68.3% (-76.1 to -58.3%) |
|                                            | Subarachnoid haemorrhage  | 2.9% (1.4–4.8%)    | 1.6 (0.8–2.7)       | -67.7% (-78.1 to -48.2%) | 2.3% (1.1–3.8%)    | <0.1 (<0.1–0.1)  | -74.1% (-83.7 to -54.4%) |
| Diet low in vegetables                     | Stroke                    | 0.6% (0.2–1.1%)    | 7.5 (2.9–14.1)      | -85.7% (-90.8 to -75.5%) | 0.7% (0.3–1.2%)    | 0.5 (0.2–0.8)    | -80.8% (-87.6 to -69.1%) |
|                                            | Ischaemic stroke          | 0.6% (0.2–1.2%)    | 5.8 (2–11.7)        | -83.3% (-89.5 to -55.1%) | 0.7% (0.2–1.3%)    | 0.4 (0.1–0.7)    | -77.7% (-85.8 to -53%)   |
|                                            | Intracerebral haemorrhage | 0.6% (0.2–1.8%)    | 1.4 (0.4–4)         | -90.4% (-95 to -64%)     | 0.8% (0.2–2.1%)    | 0.1 (0–0.2)      | -87.5% (-93.2 to -63.5%) |
|                                            | Subarachnoid haemorrhage  | 0.6% (0.2–1.8%)    | 0.3 (0.1–1)         | -90.9% (-95.7 to -66.1%) | 0.8% (0.2–2.1%)    | <0.1 (<0.1–<0.1) | -89.4% (-95.1 to -68%)   |
| Diet low in whole grains                   | Stroke                    | 7.5% (4.2–9.5%)    | 94.2 (53–120.6)     | -42.4% (-47.9 to -34.4%) | 7.1% (4.3–8.8%)    | 4.7 (2.9–5.9)    | -42.8% (-49.8 to -32.4%) |
|                                            | Ischaemic stroke          | 9.6% (5.4–12.2%)   | 94.2 (53–120.6)     | -42.4% (-47.9 to -34.4%) | 8.6% (5.2–10.6%)   | 4.7 (2.9–5.9)    | -42.8% (-49.8 to -32.4%) |
| Dietary risks                              | Stroke                    | 15.3% (11.1–20.2%) | 192.9 (136.4–258.3) | -55.3% (-62.5 to -47.6%) | 13.7% (10.1–17.9%) | 9.1 (6.4–12.1)   | -54.4% (-62.5 to -45.1%) |
|                                            | Ischaemic stroke          | 16.6% (11.8–21.4%) | 163.1 (112.7–213.7) | -51.7% (-59.5 to -43.8%) | 14.6% (10.6–18.6%) | 8 (5.6–10.5)     | -51.2% (-60.2 to -41.7%) |
|                                            | Intracerebral haemorrhage | 10.7% (5.8–16.7%)  | 23.9 (12.9–37.2)    | -67.9% (-76.3 to -58.3%) | 9.5% (5.1–15.1%)   | 0.9 (0.5–1.4)    | -68% (-76.3 to -57.8%)   |
|                                            | Subarachnoid haemorrhage  | 11% (6–17%)        | 6 (3.3–9.4)         | -68.5% (-79.9 to -49.7%) | 9.5% (5.2–15.1%)   | 0.2 (0.1–0.3)    | -72.9% (-83.3 to -52.8%) |
| Environmental/occupational risk factors§   | Meningitis                | 0.8% (0.6–1%)      | 0.3 (0.2–0.4)       | -85.4% (-91.3 to -76.8%) | 0.4% (0.3–0.5%)    | <0.1 (<0.1–<0.1) | -85.4% (-91.3 to -76.8%) |
|                                            | Encephalitis              | 0.6% (0.2–0.9%)    | 0.1 (0–0.2)         | -9.6% (-51.9 to 45%)     | 0.4% (0.2–0.5%)    | <0.1 (<0.1–<0.1) | -9.6% (-51.9 to 45%)     |
|                                            | Stroke                    | 36.6% (33.5–40%)   | 461.7 (408.7–516)   | -48.3% (-53.5 to -40.7%) | 34.4% (31.4–37.6%) | 22.8 (19.8–25.6) | -46.9% (-52.2 to -37.4%) |
|                                            | Ischaemic stroke          | 35.9% (32.7–39.4%) | 353.4 (309.2–397.3) | -45.4% (-51.1 to -37.7%) | 33.8% (30.7–37.2%) | 18.5 (15.9–20.9) | -44.3% (-50.4 to -34.6%) |
|                                            | Intracerebral haemorrhage | 38.9% (35.5–42.4%) | 86.9 (77.9–96.5)    | -55.7% (-62.1 to -48.3%) | 37.5% (34.4–41.1%) | 3.5 (3.1–3.9)    | -54.4% (-61.4 to -45%)   |
|                                            | Subarachnoid haemorrhage  | 39.1% (35.6–42.6%) | 21.4 (18.3–25.3)    | -56.7% (-68.9 to -33.8%) | 37.6% (33.9–41.4%) | 0.8 (0.7–0.9)    | -60.6% (-73.7 to -35.7%) |
| High body-mass index                       | Stroke                    | 28% (19.9–36.2%)   | 353.2 (248.5–462.5) | -22.9% (-37.2 to 0.4%)   | 17.8% (11.4–24.4%) | 11.8 (7.7–16.4)  | -24.2% (-38.7 to -0.5%)  |
|                                            | Ischaemic stroke          | 23.9% (16.2–32%)   | 235.2 (158.4–319.6) | -16.1% (-31.9 to 8.5%)   | 15.2% (9.2–21.9%)  | 8.3 (5.1–12.1)   | -17.8% (-35.3 to 7.6%)   |
|                                            | Intracerebral haemorrhage | 42.1% (31.2–52.5%) | 94 (70.1–118.7)     | -33.5% (-46.7 to -11.2%) | 30% (20.8–40.1%)   | 2.8 (1.9–3.7)    | -35.1% (-48.7 to -12.5%) |
|                                            | Subarachnoid haemorrhage  | 43.9% (33–54.5%)   | 24 (17.6–31.8)      | -33.5% (-52.4 to -0.4%)  | 30.1% (20.5–40.4%) | 0.6 (0.4–0.9)    | -41.5% (-60.4 to -4.7%)  |
|                                            | Neurological disorders*   | 4.8% (1.4–10.7%)   | 65.2 (18.7–168.6)   | 67.3% (36.6 to 135.2%)   | 12.1% (4.6–22.6%)  | 4.2 (0.7–12.5)   | 70.2% (33 to 163.6%)     |

**Table S16** Regional and national disabilities and deaths related to neurological conditions attributable to risk factors in North Africa and Middle East countries

| Location<br>Risk factor (alphabetic order) | Cause                                   | DALYs (95% UI)     |                     |                           | Deaths (95% UI)    |                  |                           |
|--------------------------------------------|-----------------------------------------|--------------------|---------------------|---------------------------|--------------------|------------------|---------------------------|
|                                            |                                         | PAF (%)            | Rate per 100,000    | Rate change (%)           | PAF (%)            | Rate per 100,000 | Rate change (%)           |
|                                            |                                         | 2019               | 2019                | From 1990 to 2019         | 2019               | 2019             | From 1990 to 2019         |
| High fasting plasma glucose                | Alzheimer's disease and other dementias | 16.9% (7.2–29.6%)  | 65.2 (18.7–168.6)   | 67.3% (36.6 to 135.2%)    | 16.4% (6.8–28.7%)  | 4.2 (0.7–12.5)   | 70.2% (33 to 163.6%)      |
|                                            | Stroke                                  | 27.9% (16.5–46.7%) | 352.2 (207.7–596.8) | 5.7% (-13.3 to 29.2%)     | 28.8% (15.2–57.4%) | 19.1 (10.3–38.3) | 5.1% (-15.3 to 30.3%)     |
|                                            | Ischaemic stroke                        | 29.1% (15–53.9%)   | 287 (145.3–533.2)   | 11.7% (-9 to 36.4%)       | 29.3% (13.6–64.1%) | 16.1 (7.5–35.5)  | 9.8% (-12 to 35.6%)       |
|                                            | Intracerebral haemorrhage               | 23.5% (14.7–34.4%) | 52.5 (32.9–77.7)    | -11.4% (-29.4 to 11.8%)   | 26.5% (15.6–42.3%) | 2.5 (1.4–4)      | -9.1% (-28.1 to 15.6%)    |
|                                            | Subarachnoid haemorrhage                | 23.3% (14.8–33.6%) | 12.7 (7.8–18.3)     | -25% (-49.2 to 22.3%)     | 27.2% (16.1–44.2%) | 0.6 (0.3–0.9)    | -31.6% (-54.9 to 19.9%)   |
|                                            | Neurological disorders*                 | 3.4% (0.6–9.4%)    | 46.9 (8.4–146.1)    | 70.5% (57.1 to 113.5%)    | 8.9% (1.9–20.1%)   | 3.1 (0.3–11.1)   | 66.2% (50.4 to 132.4%)    |
| High LDL cholesterol                       | Alzheimer's disease and other dementias | 12.1% (2.9–25.4%)  | 46.9 (8.4–146.1)    | 70.5% (57.1 to 113.5%)    | 12% (2.9–25.3%)    | 3.1 (0.3–11.1)   | 66.2% (50.4 to 132.4%)    |
|                                            | Stroke                                  | 18.6% (10.8–31%)   | 234.3 (135.1–399.7) | -44.4% (-50.7 to -37.5%)  | 16.6% (6.1–33.9%)  | 11 (4–22.8)      | -44.9% (-53.4 to -35.6%)  |
| High systolic blood pressure               | Ischaemic stroke                        | 23.8% (13.9–39.8%) | 234.3 (135.1–399.7) | -44.4% (-50.7 to -37.5%)  | 20.1% (7.4–41.1%)  | 11 (4–22.8)      | -44.9% (-53.4 to -35.6%)  |
|                                            | Stroke                                  | 48.6% (40.7–56.1%) | 612.9 (506.3–718.1) | -42.7% (-48.8 to -33.6%)  | 44.7% (35.7–54.7%) | 29.6 (23.5–36.4) | -43.6% (-50.2 to -33%)    |
| High temperature                           | Ischaemic stroke                        | 47.4% (37.9–56.5%) | 466.4 (369.2–559.5) | -39.7% (-46.5 to -30.5%)  | 43.2% (33.2–54.7%) | 23.7 (17.9–30.3) | -41% (-48.5 to -29.9%)    |
|                                            | Intracerebral haemorrhage               | 52.9% (44.3–60.9%) | 118 (98.2–138)      | -49.8% (-57.7 to -40.3%)  | 52.1% (41.1–62.4%) | 4.8 (3.8–5.8)    | -50.1% (-58 to -39.5%)    |
|                                            | Subarachnoid haemorrhage                | 52.3% (43.9–60.4%) | 28.5 (22.9–35.4)    | -53% (-66.9 to -26.9%)    | 51.6% (40.7–61.7%) | 1.1 (0.8–1.4)    | -58.9% (-72.9 to -32.1%)  |
|                                            | Stroke                                  | 0.6% (0.1–1.1%)    | 7.7 (1.6–14)        | -26.1% (-404.2 to 244%)   | 0.7% (0.1–1.3%)    | 0.5 (0.1–0.8)    | -25.3% (-349.5 to 245.7%) |
|                                            | Ischaemic stroke                        | 0.6% (0.1–1.1%)    | 6 (1.2–10.8)        | -25.5% (-288.5 to 226%)   | 0.7% (0.2–1.3%)    | 0.4 (0.1–0.7)    | -23.9% (-284.5 to 220.3%) |
|                                            | Intracerebral haemorrhage               | 0.6% (0.1–1.2%)    | 1.4 (0.2–2.6)       | -27.1% (-462.8 to 280.3%) | 0.6% (0.1–1.2%)    | 0.1 (0–0.1)      | -30.4% (-407.4 to 290.2%) |
| Household air pollution from solid fuels   | Subarachnoid haemorrhage                | 0.5% (0.1–1%)      | 0.3 (0–0.6)         | -32.8% (-437.6 to 431.9%) | 0.6% (0–1.1%)      | <0.1 (<0.1–<0.1) | -40.4% (-427.4 to 279.1%) |
|                                            | Meningitis                              | 0% (0–0%)          | <0.1 (<0.1–<0.1)    | -99.6% (-99.9 to -99.1%)  | 0% (0–0%)          | <0.1 (<0.1–<0.1) | -99.6% (-99.9 to -99.1%)  |
|                                            | Encephalitis                            | 0% (0–0%)          | <0.1 (<0.1–<0.1)    | -97.9% (-99.4 to -94.3%)  | 0% (0–0%)          | <0.1 (<0.1–<0.1) | -97.9% (-99.4 to -94.3%)  |
|                                            | Stroke                                  | 0.1% (0–0.1%)      | 0.8 (0.3–1.7)       | -99.3% (-99.7 to -98.3%)  | 0% (0–0.1%)        | <0.1 (<0.1–0.1)  | -99.3% (-99.7 to -98.4%)  |
|                                            | Ischaemic stroke                        | 0.1% (0–0.1%)      | 0.6 (0.2–1.3)       | -99.3% (-99.7 to -98.3%)  | 0% (0–0.1%)        | <0.1 (<0.1–0.1)  | -99.3% (-99.7 to -98.4%)  |
|                                            | Intracerebral haemorrhage               | 0.1% (0–0.2%)      | 0.2 (0.1–0.4)       | -99.3% (-99.7 to -98.3%)  | 0.1% (0–0.1%)      | <0.1 (<0.1–<0.1) | -99.4% (-99.7 to -98.5%)  |
| Kidney dysfunction                         | Subarachnoid haemorrhage                | 0.1% (0–0.1%)      | <0.1 (<0.1–0.1)     | -99.4% (-99.8 to -98.3%)  | 0% (0–0.1%)        | <0.1 (<0.1–<0.1) | -99.5% (-99.8 to -98.6%)  |
|                                            | Stroke                                  | 11.1% (8.3–13.6%)  | 139.5 (105.2–173.9) | -35.6% (-44.1 to -25%)    | 10% (5.9–13.6%)    | 6.6 (4–9.1)      | -36.4% (-48.9 to -22.9%)  |
|                                            | Ischaemic stroke                        | 12% (8.6–15.2%)    | 118.3 (84.3–151.7)  | -33.5% (-41.9 to -22.5%)  | 10.2% (5.4–14.5%)  | 5.6 (3–8)        | -35.2% (-50 to -21.5%)    |
| Lead exposure                              | Intracerebral haemorrhage               | 9.5% (7.7–11.4%)   | 21.2 (17.1–25.7)    | -45.5% (-54 to -34.3%)    | 11% (8.1–13.7%)    | 1 (0.8–1.3)      | -42.3% (-51.7 to -28.3%)  |
|                                            | Stroke                                  | 6.9% (4.7–9.3%)    | 87.5 (57.8–117.9)   | -53.2% (-60.6 to -45.7%)  | 7% (4.6–9.7%)      | 4.6 (3–6.4)      | -45.8% (-54 to -35.7%)    |
|                                            | Ischaemic stroke                        | 6.8% (4.5–9.4%)    | 67.2 (43.8–92.8)    | -48.3% (-57.3 to -39.8%)  | 6.7% (4.3–9.8%)    | 3.7 (2.3–5.3)    | -41.3% (-50.5 to -30.3%)  |
|                                            | Intracerebral haemorrhage               | 7.4% (4.8–10.4%)   | 16.5 (10.6–23.1)    | -64.1% (-70.6 to -56.5%)  | 8.1% (5.2–11.5%)   | 0.8 (0.5–1.1)    | -57.3% (-64.8 to -47.6%)  |
|                                            | Subarachnoid haemorrhage                | 6.8% (4.2–9.8%)    | 3.7 (2.2–5.5)       | -66.2% (-77.3 to -47%)    | 7.8% (4.9–11.2%)   | 0.2 (0.1–0.2)    | -63.1% (-75.9 to -38.9%)  |
| Low birth weight                           | Meningitis                              | 3.9% (2.9–4.8%)    | 1.5 (1.1–2)         | -86.6% (-91.7 to -79.7%)  | 2.1% (1.5–2.7%)    | <0.1 (<0.1–<0.1) | -86.6% (-91.7 to -79.7%)  |

**Table S16** Regional and national disabilities and deaths related to neurological conditions attributable to risk factors in North Africa and Middle East countries

| Location<br>Risk factor (alphabetic order) |                                         | DALYs (95% UI)     |                      |                          | Deaths (95% UI)    |                  |                          |
|--------------------------------------------|-----------------------------------------|--------------------|----------------------|--------------------------|--------------------|------------------|--------------------------|
|                                            |                                         | PAF (%)            | Rate per 100,000     | Rate change (%)          | PAF (%)            | Rate per 100,000 | Rate change (%)          |
| Cause                                      |                                         | 2019               | 2019                 | From 1990 to 2019        | 2019               | 2019             | From 1990 to 2019        |
| Low birth weight and short gestation       | Encephalitis                            | 3.2% (1.3–4.4%)    | 0.5 (0.2–0.8)        | -16.9% (-54.1 to 26.4%)  | 1.9% (0.9–2.7%)    | <0.1 (<0.1–<0.1) | -16.9% (-54.1 to 26.4%)  |
|                                            | Meningitis                              | 4.3% (3.2–5.3%)    | 1.6 (1.2–2.2)        | -86.3% (-91.5 to -79.3%) | 2.3% (1.7–2.9%)    | <0.1 (<0.1–<0.1) | -86.3% (-91.5 to -79.3%) |
| Low physical activity                      | Encephalitis                            | 3.5% (1.4–4.8%)    | 0.6 (0.2–0.8)        | -15.2% (-53.5 to 28.8%)  | 2.1% (1.2–2.9%)    | <0.1 (<0.1–<0.1) | -15.2% (-53.5 to 28.8%)  |
|                                            | Stroke                                  | 5% (1–12.4%)       | 63.4 (12–154.7)      | -39.3% (-47.1 to -27.3%) | 6.3% (1.3–14.1%)   | 4.2 (0.9–9.4)    | -38.9% (-47.4 to -25.6%) |
| Low temperature                            | Ischaemic stroke                        | 6.4% (1.2–15.7%)   | 63.4 (12–154.7)      | -39.3% (-47.1 to -27.3%) | 7.6% (1.6–17%)     | 4.2 (0.9–9.4)    | -38.9% (-47.4 to -25.6%) |
|                                            | Stroke                                  | 7.6% (5.7–9.5%)    | 95.6 (71.6–120.4)    | -48.4% (-54.9 to -39.3%) | 9% (6.9–11.2%)     | 6 (4.5–7.6)      | -43.7% (-50.7 to -32.4%) |
| Metabolic risk factors†                    | Ischaemic stroke                        | 7.4% (5.6–9.3%)    | 73.1 (54.8–92)       | -45.5% (-53 to -35.4%)   | 9% (6.9–11.1%)     | 4.9 (3.7–6.3)    | -41.1% (-48.7 to -29.6%) |
|                                            | Intracerebral haemorrhage               | 8.2% (6.2–10.1%)   | 18.3 (13.8–22.9)     | -55.5% (-62.4 to -47.6%) | 9.1% (7–11.2%)     | 0.8 (0.6–1.1)    | -51.7% (-59.3 to -41.1%) |
|                                            | Subarachnoid haemorrhage                | 7.8% (6–9.8%)      | 4.3 (3.2–5.6)        | -58.7% (-71.4 to -34.4%) | 9.1% (7.1–11.2%)   | 0.2 (0.1–0.2)    | -59.9% (-73.5 to -34.5%) |
|                                            | Stroke                                  | 72.3% (64.4–80.5%) | 912.2 (796.5–1035.6) | -39.7% (-46.2 to -30.1%) | 68.3% (57.8–81.3%) | 45.2 (37.1–54.9) | -39.8% (-46.9 to -27.9%) |
|                                            | Ischaemic stroke                        | 72.9% (63.7–83.4%) | 717.4 (611.6–838.3)  | -37.5% (-44.7 to -27.8%) | 68.1% (55.7–83.7%) | 37.4 (29.8–46.6) | -37.6% (-45.7 to -25.4%) |
|                                            | Intracerebral haemorrhage               | 70.7% (63.6–77.2%) | 157.9 (141–174.5)    | -46.3% (-54.6 to -35.3%) | 69.8% (61.4–78.1%) | 6.5 (5.6–7.4)    | -46.5% (-55.1 to -34%)   |
|                                            | Subarachnoid haemorrhage                | 67.6% (59.8–74.8%) | 36.9 (31.2–44.3)     | -49.3% (-64.1 to -21.7%) | 65.9% (56.4–75.4%) | 1.4 (1.1–1.7)    | -55.7% (-70.7 to -27.2%) |
| Non-optimal temperature                    | Neurological disorders*                 | 7.6% (2.6–16.2%)   | 104.1 (33.4–264.7)   | 63.4% (40.8 to 114.3%)   | 19.5% (8.1–33.4%)  | 6.7 (1.2–20.6)   | 63.4% (37.5 to 134.8%)   |
|                                            | Alzheimer's disease and other dementias | 26.9% (13.2–43.1%) | 104.1 (33.4–264.7)   | 63.4% (40.8 to 114.3%)   | 26.4% (12.9–42.6%) | 6.7 (1.2–20.6)   | 63.4% (37.5 to 134.8%)   |
|                                            | Stroke                                  | 8.2% (6.4–10%)     | 103 (79.8–127.2)     | -47.3% (-54.7 to -37.3%) | 9.7% (7.7–11.8%)   | 6.4 (5–8)        | -42.8% (-50.8 to -30.5%) |
|                                            | Ischaemic stroke                        | 8% (6.3–9.8%)      | 78.8 (60.7–97.7)     | -44.4% (-53.3 to -33.5%) | 9.7% (7.7–11.8%)   | 5.3 (4.1–6.6)    | -40.2% (-49.4 to -27.4%) |
| Other environmental risks                  | Intracerebral haemorrhage               | 8.8% (6.9–10.7%)   | 19.6 (15.3–24.1)     | -54.3% (-61.7 to -45.8%) | 9.7% (7.7–11.8%)   | 0.9 (0.7–1.1)    | -50.8% (-58.5 to -39.3%) |
|                                            | Subarachnoid haemorrhage                | 8.3% (6.6–10.2%)   | 4.5 (3.5–5.9)        | -57.7% (-70.9 to -32.4%) | 9.7% (7.6–11.7%)   | 0.2 (0.2–0.3)    | -59.2% (-73.2 to -32.7%) |
|                                            | Stroke                                  | 6.9% (4.7–9.3%)    | 87.5 (57.8–117.9)    | -53.2% (-60.6 to -45.7%) | 7% (4.6–9.7%)      | 4.6 (3–6.4)      | -45.8% (-54 to -35.7%)   |
|                                            | Ischaemic stroke                        | 6.8% (4.5–9.4%)    | 67.2 (43.8–92.8)     | -48.3% (-57.3 to -39.8%) | 6.7% (4.3–9.8%)    | 3.7 (2.3–5.3)    | -41.3% (-50.5 to -30.3%) |
| Particulate matter pollution               | Intracerebral haemorrhage               | 7.4% (4.8–10.4%)   | 16.5 (10.6–23.1)     | -64.1% (-70.6 to -56.5%) | 8.1% (5.2–11.5%)   | 0.8 (0.5–1.1)    | -57.3% (-64.8 to -47.6%) |
|                                            | Subarachnoid haemorrhage                | 6.8% (4.2–9.8%)    | 3.7 (2.2–5.5)        | -66.2% (-77.3 to -47%)   | 7.8% (4.9–11.2%)   | 0.2 (0.1–0.2)    | -63.1% (-75.9 to -38.9%) |
|                                            | Meningitis                              | 0.8% (0.6–1%)      | 0.3 (0.2–0.4)        | -85.4% (-91.3 to -76.8%) | 0.4% (0.3–0.5%)    | <0.1 (<0.1–<0.1) | -85.4% (-91.3 to -76.8%) |
|                                            | Encephalitis                            | 0.6% (0.2–0.9%)    | 0.1 (0–0.2)          | -9.6% (-51.9 to 45%)     | 0.4% (0.2–0.5%)    | <0.1 (<0.1–<0.1) | -9.6% (-51.9 to 45%)     |
|                                            | Stroke                                  | 25.8% (22.8–29%)   | 325.8 (281.7–373.3)  | -48.3% (-53.6 to -40.5%) | 22% (19.3–24.9%)   | 14.5 (12.3–16.8) | -49.2% (-54.8 to -40%)   |
|                                            | Ischaemic stroke                        | 25.2% (22.2–28.4%) | 248 (213–286.4)      | -45.9% (-52 to -38.1%)   | 21.4% (18.7–24.2%) | 11.7 (9.8–13.6)  | -47% (-54 to -37.7%)     |
|                                            | Intracerebral haemorrhage               | 27.8% (24.5–31.1%) | 62.1 (54.1–70.3)     | -54.9% (-61.8 to -46.9%) | 24.6% (21.7–27.7%) | 2.3 (2–2.6)      | -55.5% (-62.5 to -46.3%) |
| Secondhand smoke                           | Subarachnoid haemorrhage                | 28.8% (25.4–32.2%) | 15.7 (13.3–18.9)     | -54.7% (-67.3 to -31.4%) | 25.1% (22–28.5%)   | 0.5 (0.4–0.6)    | -60.6% (-73.5 to -35.6%) |
|                                            | Stroke                                  | 3.4% (2.6–4.3%)    | 43.2 (32.2–53.8)     | -48% (-55 to -38.8%)     | 2.9% (2.2–3.7%)    | 1.9 (1.4–2.4)    | -47.6% (-55.8 to -36.9%) |
|                                            | Ischaemic stroke                        | 3.2% (2.4–4.1%)    | 31.9 (23.6–40.2)     | -45.2% (-54.6 to -36%)   | 2.7% (2.1–3.5%)    | 1.5 (1.1–1.9)    | -45% (-55.8 to -34.2%)   |
|                                            | Intracerebral haemorrhage               | 4% (3–5.1%)        | 9 (6.7–11.3)         | -54.4% (-62.2 to -44.8%) | 3.5% (2.6–4.3%)    | 0.3 (0.2–0.4)    | -54.3% (-62.5 to -44%)   |



**Table S16** Regional and national disabilities and deaths related to neurological conditions attributable to risk factors in North Africa and Middle East countries

| Location<br>Risk factor (alphabetic order) | Cause                                   | DALYs (95% UI)     |                        |                            | Deaths (95% UI)    |                         |                            |
|--------------------------------------------|-----------------------------------------|--------------------|------------------------|----------------------------|--------------------|-------------------------|----------------------------|
|                                            |                                         | PAF (%)            | Rate per 100,000       | Rate change (%)            | PAF (%)            | Rate per 100,000        | Rate change (%)            |
|                                            |                                         | 2019               | 2019                   | From 1990 to 2019          | 2019               | 2019                    | From 1990 to 2019          |
| Short gestation                            | Subarachnoid haemorrhage                | 4.2% (3.2–5.3%)    | 2.3 (1.7–3)            | -54.7% (-67.2 to -31%)     | 3.6% (2.7–4.5%)    | 0.1 (0.1–0.1)           | -59.7% (-72.7 to -35.2%)   |
|                                            | Meningitis                              | 2.9% (2.2–3.6%)    | 1.1 (0.8–1.5)          | -83.5% (-89.7 to -75.2%)   | 1.6% (1.1–2%)      | <0.1 (<0.1–<0.1)        | -83.5% (-89.7 to -75.2%)   |
|                                            | Encephalitis                            | 2.4% (1.3–3%)      | 0.4 (0.1–0.6)          | 1.1% (-44.1 to 53.9%)      | 1.5% (0.7–2%)      | <0.1 (<0.1–<0.1)        | 1.1% (-44.1 to 53.9%)      |
| Smoking                                    | Stroke                                  | 11.5% (10.5–12.6%) | 145.3 (129.3–161.8)    | -55.2% (-62.8 to -46.8%)   | 7.9% (7.2–8.8%)    | 5.2 (4.6–5.9)           | -56.8% (-64.3 to -47.5%)   |
|                                            | Ischaemic stroke                        | 10.9% (9.9–11.9%)  | 107.1 (94.5–119.6)     | -53% (-61 to -44.4%)       | 7.3% (6.6–8.2%)    | 4 (3.5–4.5)             | -54.9% (-63.6 to -45.6%)   |
|                                            | Intracerebral haemorrhage               | 13.9% (12.7–15.3%) | 31.1 (27.8–34.7)       | -60.7% (-67.3 to -52.5%)   | 11.1% (10.1–12.2%) | 1 (0.9–1.1)             | -61.7% (-68.4 to -52.9%)   |
| Tobacco                                    | Subarachnoid haemorrhage                | 13.1% (11.6–15.1%) | 7.2 (6.9–3)            | -58.9% (-72.5 to -35.4%)   | 10.6% (9.3–12.3%)  | 0.2 (0.2–0.3)           | -63% (-76.3 to -38.6%)     |
|                                            | Neurological disorders*                 | 3.2% (1.2–6.6%)    | 43.9 (15.3–103.2)      | -9.8% (-22.8 to 9.5%)      | 6.6% (2.4–10.9%)   | 2.3 (0.3–7)             | -8.3% (-25.2 to 24.4%)     |
|                                            | Alzheimer's disease and other dementias | 11.9% (7.4–16.7%)  | 46 (17.5–104.7)        | -11.3% (-24.8 to 7.2%)     | 10.1% (6–14.2%)    | 2.5 (0.6–7.1)           | -9.2% (-25.6 to 17.5%)     |
|                                            | Parkinson's disease                     | -6.4% (-9.8–3.2%)  | -4.9 (-7.6–2.4)        | -20.8% (-40.1 to 4.9%)     | -5.4% (-8.3–2.6%)  | -0.3 (-0.4–0.1)         | -15.9% (-38.2 to 15.3%)    |
|                                            | Multiple sclerosis                      | 9.8% (7.2–13.5%)   | 2.9 (1.9–4.7)          | -6.3% (-34.1 to 15%)       | 10.4% (7.4–14.7%)  | <0.1 (<0.1–0.1)         | 0.1% (-40.7 to 40%)        |
|                                            | Stroke                                  | 14.5% (13.3–15.8%) | 182.9 (162.8–202.4)    | -53.6% (-60.5 to -46%)     | 10.5% (9.5–11.6%)  | 7 (6.1–7.8)             | -54.6% (-62 to -45.8%)     |
|                                            | Ischaemic stroke                        | 13.7% (12.5–15%)   | 135 (119–150.1)        | -51.3% (-59 to -43.6%)     | 9.8% (8.8–10.9%)   | 5.4 (4.7–6)             | -52.5% (-61.1 to -43.9%)   |
|                                            | Intracerebral haemorrhage               | 17.4% (15.9–18.8%) | 38.8 (34.9–43)         | -59.3% (-65.9 to -51.5%)   | 14.1% (12.8–15.4%) | 1.3 (1.2–1.4)           | -60.1% (-67 to -51.5%)     |
|                                            | Subarachnoid haemorrhage                | 16.8% (15.1–18.9%) | 9.2 (7.7–11.5)         | -57.9% (-71.2 to -34.7%)   | 13.7% (12.2–15.5%) | 0.3 (0.2–0.4)           | -62.2% (-75.3 to -38.6%)   |
|                                            | Neurological disorders*                 | 3.2% (1.2–6.6%)    | 43.9 (15.3–103.2)      | -9.8% (-22.8 to 9.5%)      | 6.6% (2.4–10.9%)   | 2.3 (0.3–7)             | -8.3% (-25.2 to 24.4%)     |
| Alzheimer's disease and other dementias    | 11.9% (7.4–16.7%)                       | 46 (17.5–104.7)    | -11.3% (-24.8 to 7.2%) | 10.1% (6–14.2%)            | 2.5 (0.6–7.1)      | -9.2% (-25.6 to 17.5%)  |                            |
| Parkinson's disease                        | -6.4% (-9.8–3.2%)                       | -4.9 (-7.6–2.4)    | -20.8% (-40.1 to 4.9%) | -5.4% (-8.3–2.6%)          | -0.3 (-0.4–0.1)    | -15.9% (-38.2 to 15.3%) |                            |
| Multiple sclerosis                         | 9.8% (7.2–13.5%)                        | 2.9 (1.9–4.7)      | -6.3% (-34.1 to 15%)   | 10.4% (7.4–14.7%)          | <0.1 (<0.1–0.1)    | 0.1% (-40.7 to 40%)     |                            |
| <b>Iraq</b>                                |                                         |                    |                        |                            |                    |                         |                            |
| Air pollution                              | Meningitis                              | 1.6% (0.9–2.7%)    | 1.1 (0.6–1.9)          | -85.4% (-94 to -65.4%)     | 1% (0.5–1.7%)      | <0.1 (<0.1–<0.1)        | -85.4% (-94 to -65.4%)     |
|                                            | Encephalitis                            | 0.6% (0.3–1.2%)    | 0.5 (0.2–0.9)          | -35.3% (-76.1 to 67.1%)    | 0.4% (0.1–0.8%)    | <0.1 (<0.1–<0.1)        | -35.3% (-76.1 to 67.1%)    |
|                                            | Stroke                                  | 31.4% (26.2–36.4%) | 917.9 (689.8–1178.5)   | -27.3% (-43.3 to -7.8%)    | 27.4% (22.4–32%)   | 39.2 (29.7–49.4)        | -24.1% (-40.4 to -5.4%)    |
| Alcohol use                                | Ischaemic stroke                        | 29.7% (24.6–34.6%) | 543.9 (414.4–681.4)    | -17.1% (-34.6 to 3%)       | 25.8% (21–30.2%)   | 26.1 (19.7–32.6)        | -13.5% (-32.5 to 7.1%)     |
|                                            | Intracerebral haemorrhage               | 34.1% (28.7–39.3%) | 349 (254.3–465.6)      | -35% (-52.4 to -12.5%)     | 31.1% (25.8–36%)   | 12.4 (9.1–16.2)         | -35% (-52.1 to -13.7%)     |
|                                            | Subarachnoid haemorrhage                | 34.7% (29.3–40.1%) | 25.1 (17.6–35.9)       | -64.2% (-77.1 to -41.8%)   | 31.6% (26.3–36.7%) | 0.7 (0.5–1.1)           | -69.3% (-81.2 to -45%)     |
|                                            | Stroke                                  | 0.4% (0–0.9%)      | 12 (-0.7–26.6)         | -75.8% (-102.8 to -44.8%)  | 0.2% (-0.1–0.5%)   | 0.3 (-0.1–0.8)          | -81.7% (-113.6 to -48.9%)  |
|                                            | Ischaemic stroke                        | -0.1% (-0.4–0.2%)  | -1.9 (-7.6–4.3)        | -133.9% (-745.5 to 567.5%) | -0.1% (-0.4–0.1%)  | -0.1 (-0.4–0.1)         | -193% (-1588.2 to 1035.1%) |
|                                            | Intracerebral haemorrhage               | 1.4% (0.5–2.4%)    | 14 (4.4–27.2)          | -68.2% (-87.2 to -40.8%)   | 1% (0.3–1.9%)      | 0.4 (0.1–0.8)           | -69.8% (-88.3 to -43.3%)   |
|                                            | Neurological disorders*                 | 0.2% (0.1–0.4%)    | 2.3 (0.8–5)            | -64.2% (-86.1 to -18.8%)   | 0.1% (0–0.2%)      | <0.1 (<0.1–<0.1)        | -68.2% (-83.9 to -46.1%)   |



**Table S16** Regional and national disabilities and deaths related to neurological conditions attributable to risk factors in North Africa and Middle East countries

| Location<br>Risk factor (alphabetic order) | Cause                                   | DALYs (95% UI)     |                        |                          | Deaths (95% UI)    |                   |                          |
|--------------------------------------------|-----------------------------------------|--------------------|------------------------|--------------------------|--------------------|-------------------|--------------------------|
|                                            |                                         | PAF (%)            | Rate per 100,000       | Rate change (%)          | PAF (%)            | Rate per 100,000  | Rate change (%)          |
|                                            |                                         | 2019               | 2019                   | From 1990 to 2019        | 2019               | 2019              | From 1990 to 2019        |
| All risk factors                           | Idiopathic epilepsy                     | 1.8% (0.9–2.9%)    | 2.3 (0.8–5)            | -64.2% (-86.1 to -18.8%) | 2.2% (1.1–3.7%)    | <0.1 (<0.1–<0.1)  | -68.2% (-83.9 to -46.1%) |
|                                            | Meningitis                              | 8.6% (5.5–12.4%)   | 5.8 (3.5–9.2)          | -83.5% (-91.6 to -67.4%) | 5.2% (3.2–7.9%)    | 0.1 (0–0.1)       | -83.5% (-91.6 to -67.4%) |
|                                            | Encephalitis                            | 3.4% (1.6–5.9%)    | 2.4 (0.9–4.6)          | -27.5% (-69 to 73.9%)    | 2.1% (0.9–3.8%)    | <0.1 (<0.1–0.1)   | -27.5% (-69 to 73.9%)    |
|                                            | Stroke                                  | 90.3% (87.5–93%)   | 2640.3 (2134.7–3137.5) | -16.7% (-33.9 to 3.1%)   | 88.6% (84.1–92.9%) | 127 (104.4–149.1) | -11.4% (-29.7 to 8.2%)   |
|                                            | Ischaemic stroke                        | 90.5% (86.7–94.5%) | 1656.3 (1358.4–1936.1) | -5% (-24.2 to 16.5%)     | 88.1% (82.4–94.1%) | 89 (72.6–103.8)   | 0.4% (-19.9 to 22.7%)    |
|                                            | Intracerebral haemorrhage               | 90.1% (87.1–92.6%) | 921.6 (722.8–1159.3)   | -27.2% (-46 to -4.1%)    | 90% (85.8–93.4%)   | 36 (28.7–43.9)    | -26.1% (-44.1 to -4.1%)  |
|                                            | Subarachnoid haemorrhage                | 86.6% (82.7–89.9%) | 62.5 (46.4–85.8)       | -61.4% (-74.9 to -37.3%) | 87.7% (83.3–91.4%) | 2 (1.5–2.9)       | -66.6% (-79.5 to -38.2%) |
|                                            | Neurological disorders*                 | 12.4% (4.7–25.1%)  | 163.1 (58.5–403.6)     | 7.4% (-8.2 to 26.4%)     | 28.7% (12–45.5%)   | 10.2 (1.8–30.8)   | 8.9% (-10.2 to 35.3%)    |
|                                            | Alzheimer's disease and other dementias | 44.5% (30–60.4%)   | 170.2 (64.7–412.3)     | 9.4% (-7 to 27.8%)       | 42.7% (28.3–58.6%) | 10.8 (2.3–31.4)   | 8.6% (-10 to 31.9%)      |
|                                            | Parkinson's disease                     | -13% (-19.8–7%)    | -11.1 (-17.8–5.9)      | -8.6% (-34.3 to 25.6%)   | -12% (-18.2–6.5%)  | -0.7 (-1.1–0.4)   | -2.9% (-30.8 to 37.5%)   |
| Ambient particulate matter pollution       | Idiopathic epilepsy                     | 1.8% (0.9–2.9%)    | 2.3 (0.8–5)            | -64.2% (-86.1 to -18.8%) | 2.2% (1.1–3.7%)    | <0.1 (<0.1–<0.1)  | -68.2% (-83.9 to -46.1%) |
|                                            | Multiple sclerosis                      | 12.1% (8.9–16.1%)  | 1.7 (1.1–2.6)          | -8.9% (-32.6 to 16.9%)   | 14.6% (10.2–20.7%) | <0.1 (<0.1–<0.1)  | -14.9% (-49.3 to 32%)    |
|                                            | Meningitis                              | 1.6% (0.9–2.7%)    | 1.1 (0.6–1.9)          | -78.1% (-91.2 to -46.1%) | 1% (0.5–1.7%)      | <0.1 (<0.1–<0.1)  | -78.2% (-91.2 to -46.1%) |
|                                            | Encephalitis                            | 0.6% (0.3–1.2%)    | 0.5 (0.2–0.9)          | -3.3% (-66.6 to 166.7%)  | 0.4% (0.1–0.8%)    | <0.1 (<0.1–<0.1)  | -3.3% (-66.6 to 166.7%)  |
|                                            | Stroke                                  | 31.3% (26–36.4%)   | 915.6 (686.5–1176)     | 1.8% (-25.7 to 44.6%)    | 27.3% (22.4–31.8%) | 39.1 (29.6–49.4)  | 6.6% (-21.2 to 48%)      |
|                                            | Ischaemic stroke                        | 29.6% (24.5–34.6%) | 542.5 (413.4–680)      | 16.3% (-14.7 to 65.1%)   | 25.7% (20.9–30.1%) | 26 (19.6–32.5)    | 21.5% (-11.3 to 70.6%)   |
|                                            | Intracerebral haemorrhage               | 34% (28.6–39.2%)   | 348.2 (253.7–464.6)    | -9.2% (-36.3 to 34.2%)   | 31% (25.8–35.9%)   | 12.4 (9.1–16.2)   | -9.1% (-35.6 to 32.8%)   |
|                                            | Subarachnoid haemorrhage                | 34.6% (29.1–39.9%) | 25 (17.5–35.8)         | -49.1% (-68.5 to -13.8%) | 31.5% (26.2–36.6%) | 0.7 (0.5–1.1)     | -56.3% (-74 to -19.8%)   |
|                                            | Meningitis                              | 8.3% (5.3–12%)     | 5.6 (3.3–8.9)          | -83.3% (-91.6 to -67%)   | 5% (3.1–7.6%)      | 0.1 (0–0.1)       | -83.3% (-91.6 to -67%)   |
|                                            | Encephalitis                            | 3.3% (1.6–5.7%)    | 2.3 (0.9–4.4)          | -26.6% (-68.7 to 74.7%)  | 2.1% (0.9–3.6%)    | <0.1 (<0.1–<0.1)  | -26.6% (-68.7 to 74.7%)  |
| Behavioural risk factors‡                  | Stroke                                  | 38.4% (33.2–43.8%) | 1123.5 (857.1–1396)    | -21.5% (-39.3 to -0.3%)  | 35% (29.4–41%)     | 50.1 (38.3–62.5)  | -16.3% (-34.9 to 4.6%)   |
|                                            | Ischaemic stroke                        | 39% (32.5–46.6%)   | 714.1 (534.9–901.4)    | -11.2% (-30.5 to 10%)    | 35.4% (28.2–43.3%) | 35.8 (26.6–46.3)  | -5.7% (-26.8 to 16%)     |
|                                            | Intracerebral haemorrhage               | 37.5% (32.3–43.7%) | 384.1 (285.7–511.8)    | -31.9% (-51.5 to -8%)    | 33.8% (28.9–39.7%) | 13.5 (10.1–17.6)  | -31.4% (-49.9 to -8.9%)  |
|                                            | Subarachnoid haemorrhage                | 34.9% (29.5–41.7%) | 25.2 (17.6–36.1)       | -60.3% (-75.7 to -35.2%) | 32.7% (27.6–39.1%) | 0.8 (0.5–1.1)     | -64.9% (-79.2 to -36.3%) |
|                                            | Neurological disorders*                 | 4.9% (1.7–10.5%)   | 64.7 (20.8–160.1)      | -16.5% (-32.9 to -0.3%)  | 9.7% (1.9–17%)     | 3.6 (0.3–11.1)    | -16.4% (-47.6 to 3.9%)   |
|                                            | Alzheimer's disease and other dementias | 18.7% (12.3–25%)   | 71.8 (28.4–166.4)      | -11.6% (-27.2 to 4%)     | 16.6% (10.9–22.5%) | 4.2 (1–11.9)      | -13.8% (-31.2 to 4.6%)   |
|                                            | Parkinson's disease                     | -13% (-19.8–7%)    | -11.1 (-17.8–5.9)      | -8.6% (-34.3 to 25.6%)   | -12% (-18.2–6.5%)  | -0.7 (-1.1–0.4)   | -2.9% (-30.8 to 37.5%)   |
|                                            | Idiopathic epilepsy                     | 1.8% (0.9–2.9%)    | 2.3 (0.8–5)            | -64.2% (-86.1 to -18.8%) | 2.2% (1.1–3.7%)    | <0.1 (<0.1–<0.1)  | -68.2% (-83.9 to -46.1%) |
|                                            | Multiple sclerosis                      | 12.1% (8.9–16.1%)  | 1.7 (1.1–2.6)          | -8.9% (-32.6 to 16.9%)   | 14.6% (10.2–20.7%) | <0.1 (<0.1–<0.1)  | -14.9% (-49.3 to 32%)    |
|                                            | Meningitis                              | 8.3% (5.3–12%)     | 5.6 (3.3–8.9)          | -83.3% (-91.6 to -67%)   | 5% (3.1–7.6%)      | 0.1 (0–0.1)       | -83.3% (-91.6 to -67%)   |
| Child and maternal malnutrition            | Encephalitis                            | 3.3% (1.6–5.7%)    | 2.3 (0.9–4.4)          | -26.6% (-68.7 to 74.7%)  | 2.1% (0.9–3.6%)    | <0.1 (<0.1–<0.1)  | -26.6% (-68.7 to 74.7%)  |

**Table S16** Regional and national disabilities and deaths related to neurological conditions attributable to risk factors in North Africa and Middle East countries

| Location<br>Risk factor (alphabetic order) | Cause                     | DALYs (95% UI)     |                       |                          | Deaths (95% UI)    |                  |                          |
|--------------------------------------------|---------------------------|--------------------|-----------------------|--------------------------|--------------------|------------------|--------------------------|
|                                            |                           | PAF (%)            | Rate per 100,000      | Rate change (%)          | PAF (%)            | Rate per 100,000 | Rate change (%)          |
|                                            |                           | 2019               | 2019                  | From 1990 to 2019        | 2019               | 2019             | From 1990 to 2019        |
| Diet high in red meat                      | Stroke                    | 1.6% (0.5–2.8%)    | 48.3 (15–87.2)        | -45% (-61.2 to -25.5%)   | 1.3% (0.4–2.2%)    | 1.9 (0.6–3.4)    | -40.5% (-58.1 to -20.7%) |
|                                            | Ischaemic stroke          | 1.4% (0.3–2.4%)    | 25.8 (4.5–48.2)       | -36.1% (-55.7 to -7.2%)  | 1.1% (0.2–2%)      | 1.2 (0.2–2.1)    | -29.5% (-51 to 1.1%)     |
|                                            | Intracerebral haemorrhage | 2% (0.3–3.6%)      | 20.9 (2.6–42.1)       | -49.9% (-66.4 to -25.8%) | 1.8% (0.3–3.1%)    | 0.7 (0.1–1.4)    | -49% (-65.2 to -26.2%)   |
|                                            | Subarachnoid haemorrhage  | 2.2% (0.2–3.9%)    | 1.6 (0.2–3.3)         | -72.1% (-83.8 to -53.2%) | 1.9% (0.3–3.4%)    | <0.1 (<0.1–0.1)  | -75.5% (-86.3 to -54.6%) |
| Diet high in sodium                        | Stroke                    | 2.1% (0.3–3.3%)    | 61.9 (7.6–244.6)      | -18.1% (-50.6 to 63%)    | 1.8% (0.3–7.2%)    | 2.6 (0.4–10.1)   | -14.7% (-47.8 to 64.8%)  |
|                                            | Ischaemic stroke          | 1.9% (0.3–7.6%)    | 34.6 (4.7–139.3)      | -7% (-44.7 to 86.1%)     | 1.6% (0.3–6.5%)    | 1.6 (0.3–6.5)    | -2.5% (-40.7 to 84.9%)   |
|                                            | Intracerebral haemorrhage | 2.5% (0.3–9.7%)    | 25.6 (2.5–100.3)      | -25.4% (-57.7 to 43.6%)  | 2.3% (0.3–9%)      | 0.9 (0.1–3.6)    | -25.6% (-58 to 41.1%)    |
|                                            | Subarachnoid haemorrhage  | 2.3% (0.2–8.9%)    | 1.6 (0.2–6.6)         | -58.9% (-79.5 to -19%)   | 2.2% (0.3–8.3%)    | 0.1 (0–0.2)      | -63.4% (-83 to -23.1%)   |
| Diet low in fibre                          | Stroke                    | 3.3% (0.7–6.4%)    | 97.8 (19.2–191.5)     | 86.4% (29.6 to 177.4%)   | 2.8% (0.6–5.4%)    | 4.1 (0.8–7.9)    | 78.7% (24 to 158%)       |
|                                            | Ischaemic stroke          | 3.1% (0.6–5.8%)    | 55.8 (11.1–109.9)     | 108.1% (46.4 to 198.9%)  | 2.6% (0.6–4.9%)    | 2.6 (0.5–5.1)    | 95% (37.5 to 175.5%)     |
|                                            | Intracerebral haemorrhage | 3.8% (0.8–7.2%)    | 38.9 (7.4–78.4)       | 74.2% (19.5 to 176.4%)   | 3.4% (0.7–6.5%)    | 1.3 (0.3–2.7)    | 66.3% (13.7 to 153%)     |
|                                            | Subarachnoid haemorrhage  | 4.2% (0.8–8%)      | 3 (0.5–6.3)           | -7.6% (-44.1 to 58.4%)   | 3.6% (0.7–6.9%)    | 0.1 (0–0.2)      | -25.6% (-58 to 38.7%)    |
| Diet low in fruits                         | Stroke                    | 6.2% (2.9–10%)     | 180.1 (79.8–308.2)    | -5.2% (-32.5 to 35.7%)   | 4.9% (2.2–8.1%)    | 7 (3–12.1)       | -2.2% (-30.3 to 33.7%)   |
|                                            | Ischaemic stroke          | 4.7% (1.1–8.9%)    | 85.5 (18.8–166.6)     | 12.9% (-18.6 to 98.6%)   | 3.8% (0.9–7.3%)    | 3.8 (0.9–7.5)    | 17% (-14.7 to 99.4%)     |
|                                            | Intracerebral haemorrhage | 8.6% (3.9–15.8%)   | 88 (37.3–171.5)       | -12.5% (-39.7 to 46.8%)  | 7.6% (3.4–14%)     | 3 (1.3–5.8)      | -12.8% (-39.3 to 41.5%)  |
|                                            | Subarachnoid haemorrhage  | 9.2% (4.3–16.6%)   | 6.6 (2.8–13)          | -51.9% (-70.6 to -12.3%) | 8% (3.7–14.8%)     | 0.2 (0.1–0.4)    | -59.1% (-76.1 to -20.8%) |
| Diet low in vegetables                     | Stroke                    | 0.9% (0.2–1.9%)    | 25.2 (6.8–57.1)       | -32.6% (-52.6 to -0.8%)  | 0.9% (0.3–1.8%)    | 1.3 (0.4–2.7)    | -24% (-47.2 to 10.4%)    |
|                                            | Ischaemic stroke          | 0.8% (0.2–1.8%)    | 15.4 (3.8–34)         | -22% (-41.4 to 8.6%)     | 0.9% (0.2–1.8%)    | 0.9 (0.2–1.8)    | -11.4% (-34.9 to 21.7%)  |
|                                            | Intracerebral haemorrhage | 0.9% (0.2–3.3%)    | 9.2 (1.9–33.7)        | -41.1% (-58.6 to -3.4%)  | 1% (0.2–3.3%)      | 0.4 (0.1–1.3)    | -37.8% (-55.1 to -0.1%)  |
|                                            | Subarachnoid haemorrhage  | 0.9% (0.2–3.3%)    | 0.6 (0.1–2.4)         | -69.3% (-80.8 to -41.3%) | 1% (0.2–3.3%)      | <0.1 (<0.1–0.1)  | -72.6% (-84.3 to -40.1%) |
| Diet low in whole grains                   | Stroke                    | 4.3% (1.7–5.9%)    | 125.3 (49.3–183.9)    | -18% (-36.3 to 2.2%)     | 4.2% (1.8–5.7%)    | 6.1 (2.5–8.6)    | -13.1% (-32.6 to 7%)     |
|                                            | Ischaemic stroke          | 6.9% (2.7–9.4%)    | 125.3 (49.3–183.9)    | -18% (-36.3 to 2.2%)     | 6% (2.6–8.1%)      | 6.1 (2.5–8.6)    | -13.1% (-32.6 to 7%)     |
| Dietary risks                              | Stroke                    | 17% (11.7–23%)     | 497.8 (325.6–710.4)   | -10.4% (-32.7 to 14.8%)  | 15% (10.5–20.3%)   | 21.5 (14.3–30.4) | -6.5% (-28.7 to 17%)     |
|                                            | Ischaemic stroke          | 17.2% (11.3–23.8%) | 315.2 (193.7–449.3)   | -3.5% (-25.3 to 23.3%)   | 15% (10–20.7%)     | 15.1 (9.5–21.5)  | 1.3% (-20.9 to 27.3%)    |
|                                            | Intracerebral haemorrhage | 16.6% (10.3–24.8%) | 170.1 (98.6–267.2)    | -15.8% (-40.5 to 22.9%)  | 15% (9.2–22.5%)    | 6 (3.5–9.3)      | -15.9% (-39.7 to 19.8%)  |
|                                            | Subarachnoid haemorrhage  | 17.3% (10.9–25.5%) | 12.5 (6.9–20.5)       | -53.7% (-71 to -23.7%)   | 15.5% (9.7–22.9%)  | 0.4 (0.2–0.6)    | -60.4% (-76.4 to -28.5%) |
| Environmental/occupational risk factors§   | Meningitis                | 1.6% (0.9–2.7%)    | 1.1 (0.6–1.9)         | -85.4% (-94 to -65.4%)   | 1% (0.5–1.7%)      | <0.1 (<0.1–<0.1) | -85.4% (-94 to -65.4%)   |
|                                            | Encephalitis              | 0.6% (0.3–1.2%)    | 0.5 (0.2–0.9)         | -35.3% (-76.1 to 67.1%)  | 0.4% (0.1–0.8%)    | <0.1 (<0.1–<0.1) | -35.3% (-76.1 to 67.1%)  |
|                                            | Stroke                    | 38.7% (33.3–43.8%) | 1132.1 (874.6–1418.3) | -24.9% (-41.3 to -5.6%)  | 35.8% (30.9–40.7%) | 51.3 (40.5–63.6) | -19.9% (-36.4 to -1.3%)  |
|                                            | Ischaemic stroke          | 37.1% (31.9–42.1%) | 678.2 (531.6–835.8)   | -13.7% (-31.8 to 7%)     | 34.3% (29.2–39.1%) | 34.6 (27.2–42.5) | -8.3% (-27.3 to 13.4%)   |
|                                            | Intracerebral haemorrhage | 41.4% (35.7–46.9%) | 424 (314.4–553.5)     | -33.6% (-51.1 to -11.5%) | 39.3% (33.9–44.4%) | 15.7 (12.1–20.2) | -32.6% (-49.6 to -11.3%) |
|                                            | Subarachnoid haemorrhage  | 41.3% (35.7–46.8%) | 29.8 (21.2–42)        | -64.3% (-77.2 to -41.6%) | 39.6% (34.2–44.9%) | 0.9 (0.7–1.3)    | -68.6% (-80.9 to -43%)   |
| High body-mass index                       | Stroke                    | 36.1% (25.4–46.2%) | 1056.1 (692.1–1471.5) | -19.7% (-39.5 to 7.5%)   | 25% (16.4–33.8%)   | 35.9 (22.3–51)   | -16.3% (-37 to 11.5%)    |

**Table S16** Regional and national disabilities and deaths related to neurological conditions attributable to risk factors in North Africa and Middle East countries

| Location<br>Risk factor (alphabetic order) | Cause                                   | DALYs (95% UI)     |                        |                          | Deaths (95% UI)    |                   |                          |
|--------------------------------------------|-----------------------------------------|--------------------|------------------------|--------------------------|--------------------|-------------------|--------------------------|
|                                            |                                         | PAF (%)            | Rate per 100,000       | Rate change (%)          | PAF (%)            | Rate per 100,000  | Rate change (%)          |
|                                            |                                         | 2019               | 2019                   | From 1990 to 2019        | 2019               | 2019              | From 1990 to 2019        |
| High fasting plasma glucose                | Ischaemic stroke                        | 27.5% (17.8–37.1%) | 503.4 (319.4–715)      | -5% (-26.3 to 25.4%)     | 19% (11.4–27.3%)   | 19.2 (11.2–28.6)  | 0.6% (-24.9 to 35.1%)    |
|                                            | Intracerebral haemorrhage               | 50.2% (36.4–62.6%) | 514 (342.1–724.8)      | -25.7% (-46.1 to 3.9%)   | 39.3% (27.4–51.6%) | 15.7 (10.1–22.5)  | -25.7% (-46.3 to 2.9%)   |
|                                            | Subarachnoid haemorrhage                | 53.6% (40.5–65.4%) | 38.7 (25.1–57.7)       | -58.3% (-73 to -33.4%)   | 41.6% (29.4–53.6%) | 1 (0.6–1.5)       | -62.7% (-77.7 to -34.3%) |
|                                            | Neurological disorders*                 | 5.8% (1.7–13.1%)   | 75.6 (20.6–188.6)      | 18.3% (-1.8 to 61.6%)    | 14.1% (4.9–26.4%)  | 4.9 (0.8–14.9)    | 17.2% (-7.2 to 67.8%)    |
|                                            | Alzheimer's disease and other dementias | 19.7% (8.2–34.8%)  | 75.6 (20.6–188.6)      | 18.3% (-1.8 to 61.6%)    | 19.4% (8–34.1%)    | 4.9 (0.8–14.9)    | 17.2% (-7.2 to 67.8%)    |
|                                            | Stroke                                  | 30.3% (20.1–44.2%) | 884.4 (563.9–1343.1)   | 25% (-12.1 to 74.3%)     | 30.8% (18.9–51.1%) | 44.2 (27.5–72.3)  | 30% (-9.4 to 81.5%)      |
| High LDL cholesterol                       | Ischaemic stroke                        | 32% (18.2–54.6%)   | 585.6 (327.8–1009.4)   | 40.7% (-0.5 to 96.4%)    | 31.3% (16.3–59%)   | 31.6 (16–58.6)    | 45.7% (1 to 106.1%)      |
|                                            | Intracerebral haemorrhage               | 27.6% (17.8–38.8%) | 281.9 (168.6–408.6)    | 8.8% (-26.4 to 58.6%)    | 29.9% (19.7–42.3%) | 12 (7.3–17.7)     | 9.5% (-25.3 to 59%)      |
|                                            | Subarachnoid haemorrhage                | 23.5% (15.1–32.8%) | 16.9 (9.8–27)          | -47.1% (-67.3 to -5.6%)  | 27.5% (18.3–39.4%) | 0.6 (0.4–1)       | -53.3% (-72 to -9.4%)    |
|                                            | Neurological disorders*                 | 4.3% (0.8–12.2%)   | 56.2 (10.3–175.4)      | 54.7% (36.1 to 87.2%)    | 10.6% (2.3–23.9%)  | 3.7 (0.4–13.3)    | 53.5% (29.7 to 95.9%)    |
|                                            | Alzheimer's disease and other dementias | 14.7% (3.7–30.1%)  | 56.2 (10.3–175.4)      | 54.7% (36.1 to 87.2%)    | 14.5% (3.6–29.9%)  | 3.7 (0.4–13.3)    | 53.5% (29.7 to 95.9%)    |
|                                            | Stroke                                  | 14.2% (8.3–24.4%)  | 415.3 (234.4–709.9)    | -4.9% (-26.6 to 19.7%)   | 13.6% (5.2–27.8%)  | 19.5 (7.4–40.3)   | 1.6% (-22.3 to 25.6%)    |
| High systolic blood pressure               | Ischaemic stroke                        | 22.7% (13.2–38.5%) | 415.3 (234.4–709.9)    | -4.9% (-26.6 to 19.7%)   | 19.3% (7.4–39.1%)  | 19.5 (7.4–40.3)   | 1.6% (-22.3 to 25.6%)    |
|                                            | Stroke                                  | 62.3% (54.5–68.9%) | 1822.7 (1421.5–2274.3) | -13.1% (-33.1 to 10%)    | 58.3% (49.2–67%)   | 83.6 (64.9–104.3) | -8.2% (-28.7 to 14.2%)   |
|                                            | Ischaemic stroke                        | 59.7% (49–69%)     | 1091.5 (829.7–1356.3)  | 0.4% (-20.5 to 27%)      | 55.1% (42.9–66.7%) | 55.7 (40.6–71.9)  | 5.7% (-17.7 to 34%)      |
| High temperature                           | Intracerebral haemorrhage               | 66.9% (57.5–74.8%) | 684.4 (519.1–889.2)    | -23.6% (-43.4 to 2.1%)   | 65.9% (55.6–75.3%) | 26.4 (20–33.2)    | -22.7% (-41.9 to 1.7%)   |
|                                            | Subarachnoid haemorrhage                | 64.9% (55.2–73.3%) | 46.8 (33.4–66.3)       | -58.9% (-73.6 to -33.5%) | 65.3% (55.7–74.2%) | 1.5 (1.1–2.2)     | -64.7% (-78.5 to -36.7%) |
|                                            | Stroke                                  | 2.6% (0.6–5.2%)    | 76.5 (16.3–156.3)      | -4% (-41.6 to 62.6%)     | 2.9% (0.6–5.7%)    | 4.2 (0.9–8.4)     | 4% (-35.8 to 79.3%)      |
|                                            | Ischaemic stroke                        | 2.5% (0.5–5%)      | 46.1 (10–92.9)         | 12.1% (-31.3 to 94.1%)   | 2.9% (0.6–5.7%)    | 2.9 (0.6–5.9)     | 18.2% (-25.9 to 106.2%)  |
| Household air pollution from solid fuels   | Intracerebral haemorrhage               | 2.8% (0.6–5.5%)    | 28.5 (6–57.9)          | -16.1% (-48 to 44.1%)    | 2.9% (0.6–5.7%)    | 1.2 (0.2–2.4)     | -13.4% (-46.9 to 48.4%)  |
|                                            | Subarachnoid haemorrhage                | 2.6% (0.5–5.1%)    | 1.9 (0.4–4.1)          | -59.3% (-78.5 to -19.5%) | 2.9% (0.6–5.7%)    | 0.1 (0–0.1)       | -61.6% (-79.8 to -20.2%) |
|                                            | Meningitis                              | 0% (0–0%)          | <0.1 (<0.1–<0.1)       | -99.9% (-100 to -99.6%)  | 0% (0–0%)          | <0.1 (<0.1–<0.1)  | -99.9% (-100 to -99.6%)  |
|                                            | Encephalitis                            | 0% (0–0%)          | <0.1 (<0.1–<0.1)       | -99.4% (-99.8 to -98%)   | 0% (0–0%)          | <0.1 (<0.1–<0.1)  | -99.4% (-99.8 to -98%)   |
|                                            | Stroke                                  | 0.1% (0–0.2%)      | 2.3 (0.8–5.1)          | -99.4% (-99.7 to -98.5%) | 0.1% (0–0.1%)      | 0.1 (0–0.2)       | -99.3% (-99.7 to -98.4%) |
|                                            | Ischaemic stroke                        | 0.1% (0–0.2%)      | 1.4 (0.5–3)            | -99.3% (-99.7 to -98.3%) | 0.1% (0–0.1%)      | 0.1 (0–0.1)       | -99.2% (-99.7 to -98.2%) |
|                                            | Intracerebral haemorrhage               | 0.1% (0–0.2%)      | 0.9 (0.3–2)            | -99.4% (-99.8 to -98.7%) | 0.1% (0–0.2%)      | <0.1 (<0.1–0.1)   | -99.4% (-99.8 to -98.7%) |
| Kidney dysfunction                         | Subarachnoid haemorrhage                | 0.1% (0–0.2%)      | 0.1 (0–0.1)            | -99.7% (-99.9 to -99.2%) | 0.1% (0–0.2%)      | <0.1 (<0.1–<0.1)  | -99.7% (-99.9 to -99.3%) |
|                                            | Stroke                                  | 12.6% (10–14.9%)   | 367.2 (272.9–460.4)    | 12.7% (-11.3 to 40.4%)   | 12% (8.4–15.2%)    | 17.1 (11.6–22.6)  | 19.1% (-8.3 to 48.3%)    |
|                                            | Ischaemic stroke                        | 14.1% (10.5–17.6%) | 258.3 (184.5–337.1)    | 25.2% (-2.4 to 54.5%)    | 12.2% (7.5–16.7%)  | 12.3 (7.5–17.4)   | 30.3% (-1.4 to 64.1%)    |
| Lead exposure                              | Intracerebral haemorrhage               | 10.7% (8.6–12.9%)  | 108.9 (79.5–143.8)     | -8.7% (-32.3 to 20.6%)   | 12.2% (9.5–14.9%)  | 4.9 (3.5–6.4)     | -2.2% (-25.9 to 27.2%)   |
|                                            | Stroke                                  | 3.9% (2.5–9%)      | 113.9 (55.8–181.6)     | -28.8% (-45.5 to -9.4%)  | 4% (2.2–6%)        | 5.8 (3.1–9)       | -16.5% (-34.6 to 4%)     |

**Table S16** Regional and national disabilities and deaths related to neurological conditions attributable to risk factors in North Africa and Middle East countries

| Location<br>Risk factor (alphabetic order) | Cause                                   | DALYs (95% UI)     |                        |                          | Deaths (95% UI)    |                  |                          |
|--------------------------------------------|-----------------------------------------|--------------------|------------------------|--------------------------|--------------------|------------------|--------------------------|
|                                            |                                         | PAF (%)            | Rate per 100,000       | Rate change (%)          | PAF (%)            | Rate per 100,000 | Rate change (%)          |
|                                            |                                         | 2019               | 2019                   | From 1990 to 2019        | 2019               | 2019             | From 1990 to 2019        |
| Low birth weight                           | Ischaemic stroke                        | 3.9% (2–6%)        | 71 (35.6–113.3)        | -12.3% (-31.8 to 9%)     | 3.9% (2.1–6%)      | 3.9 (2.1–6.2)    | 0.4% (-21.4 to 26%)      |
|                                            | Intracerebral haemorrhage               | 4% (1.7–6.6%)      | 40.4 (16.8–70.5)       | -42.8% (-59.5 to -23.5%) | 4.4% (2.1–7%)      | 1.7 (0.8–2.9)    | -34.9% (-52.3 to -15.7%) |
|                                            | Subarachnoid haemorrhage                | 3.4% (1.2–5.9%)    | 2.4 (0.9–4.7)          | -70.3% (-82.3 to -49.9%) | 4.1% (1.9–6.6%)    | 0.1 (0–0.2)      | -69.7% (-82.1 to -43%)   |
|                                            | Meningitis                              | 7.7% (4.9–11.1%)   | 5.2 (3.1–8.1)          | -83.6% (-91.7 to -67.9%) | 4.6% (2.8–7.1%)    | 0.1 (0–0.1)      | -83.6% (-91.7 to -67.9%) |
|                                            | Encephalitis                            | 3% (1.5–5.3%)      | 2.2 (0.8–4.1)          | -27.6% (-69.3 to 72.8%)  | 1.9% (0.8–3.4%)    | <0.1 (<0.1–<0.1) | -27.6% (-69.3 to 72.8%)  |
| Low birth weight and short gestation       | Meningitis                              | 8.3% (5.3–12%)     | 5.6 (3.3–8.9)          | -83.3% (-91.6 to -67%)   | 5% (3.1–7.6%)      | 0.1 (0–0.1)      | -83.3% (-91.6 to -67%)   |
|                                            | Encephalitis                            | 3.3% (1.6–5.7%)    | 2.3 (0.9–4.4)          | -26.6% (-68.7 to 74.7%)  | 2.1% (0.9–3.6%)    | <0.1 (<0.1–<0.1) | -26.6% (-68.7 to 74.7%)  |
| Low physical activity                      | Stroke                                  | 5.3% (1.2–11.5%)   | 155.5 (34.2–351.1)     | 0.4% (-19.5 to 25.3%)    | 7% (1.7–13.8%)     | 10 (2.3–20.6)    | 4.5% (-17 to 30.5%)      |
|                                            | Ischaemic stroke                        | 8.5% (1.9–18.3%)   | 155.5 (34.2–351.1)     | 0.4% (-19.5 to 25.3%)    | 9.9% (2.4–19.6%)   | 10 (2.3–20.6)    | 4.5% (-17 to 30.5%)      |
| Low temperature                            | Stroke                                  | 4.6% (1.2–8%)      | 133.7 (33.9–240.9)     | -14.4% (-36.6 to 13%)    | 5.1% (1.4–8.9%)    | 7.3 (1.8–13.1)   | -7.1% (-29.4 to 18.9%)   |
|                                            | Ischaemic stroke                        | 4.4% (1.2–7.7%)    | 80.7 (20.1–144)        | 0.1% (-26.2 to 32.1%)    | 5.1% (1.4–8.9%)    | 5.2 (1.3–9.2)    | 5.6% (-19.2 to 35.6%)    |
| Metabolic risk factors†                    | Intracerebral haemorrhage               | 4.9% (1.3–8.5%)    | 49.8 (12.6–92)         | -25.3% (-45.8 to 1%)     | 5.1% (1.4–8.9%)    | 2 (0.5–3.7)      | -22.8% (-43 to 2.4%)     |
|                                            | Subarachnoid haemorrhage                | 4.5% (1.2–7.8%)    | 3.2 (0.8–6.2)          | -63.9% (-78.4 to -35.9%) | 5.1% (1.4–8.9%)    | 0.1 (0–0.2)      | -65.9% (-79.6 to -34.7%) |
|                                            | Stroke                                  | 80.4% (74.4–85.4%) | 2349.4 (1872.4–2819.5) | -12.3% (-31 to 9.5%)     | 77.1% (69.2–85.4%) | 110.5 (87.8–132) | -6.5% (-26.2 to 15.3%)   |
|                                            | Ischaemic stroke                        | 80% (72.1–87.7%)   | 1464.3 (1166.9–1744.4) | 0.1% (-20.1 to 24%)      | 75.8% (65.2–87.4%) | 76.6 (60.1–92.8) | 6.4% (-16.1 to 32.3%)    |
|                                            | Intracerebral haemorrhage               | 81.1% (74.5–86.1%) | 829.7 (638.3–1055.8)   | -23.1% (-43.1 to 2.2%)   | 80.3% (72.8–86.4%) | 32.1 (25.3–39.8) | -21.9% (-40.9 to 1.9%)   |
|                                            | Subarachnoid haemorrhage                | 76.9% (69.2–82.7%) | 55.5 (40.9–77.5)       | -59.2% (-73.6 to -33.4%) | 76.8% (68.5–83.5%) | 1.8 (1.3–2.5)    | -64.6% (-78.5 to -35.7%) |
| Non-optimal temperature                    | Neurological disorders*                 | 9.2% (3–20%)       | 120.6 (36–302.5)       | 28.3% (6.9 to 60.7%)     | 22.6% (9.1–38.6%)  | 7.9 (1.4–23.9)   | 27.2% (2.4 to 67%)       |
|                                            | Alzheimer's disease and other dementias | 31.5% (15.5–50.1%) | 120.6 (36–302.5)       | 28.3% (6.9 to 60.7%)     | 31% (15.3–49.4%)   | 7.9 (1.4–23.9)   | 27.2% (2.4 to 67%)       |
|                                            | Stroke                                  | 7.1% (4–10%)       | 206.6 (118.4–311.7)    | -11.1% (-34 to 19.2%)    | 7.9% (4.5–11%)     | 11.3 (6.4–16.7)  | -3.6% (-26.4 to 26.3%)   |
|                                            | Ischaemic stroke                        | 6.8% (3.9–9.7%)    | 124.7 (71.9–187.5)     | 3.8% (-22.8 to 39%)      | 7.9% (4.5–11%)     | 8 (4.5–11.7)     | 9.6% (-15.9 to 43.1%)    |
| Other environmental risks                  | Intracerebral haemorrhage               | 7.5% (4.3–10.6%)   | 76.9 (43.7–118.3)      | -22.4% (-44.1 to 5.8%)   | 7.9% (4.5–11%)     | 3.2 (1.8–4.8)    | -19.9% (-41.4 to 8.5%)   |
|                                            | Subarachnoid haemorrhage                | 6.9% (3.9–9.8%)    | 5 (2.7–8.3)            | -62.4% (-77.3 to -33.3%) | 7.9% (4.5–11%)     | 0.2 (0.1–0.3)    | -64.5% (-78.7 to -31.8%) |
|                                            | Stroke                                  | 3.9% (2.5–9%)      | 113.9 (55.8–181.6)     | -28.8% (-45.5 to -9.4%)  | 4% (2.2–6%)        | 5.8 (3.1–9)      | -16.5% (-34.6 to 4%)     |
|                                            | Ischaemic stroke                        | 3.9% (2–6%)        | 71 (35.6–113.3)        | -12.3% (-31.8 to 9%)     | 3.9% (2.1–6%)      | 3.9 (2.1–6.2)    | 0.4% (-21.4 to 26%)      |
|                                            | Intracerebral haemorrhage               | 4% (1.7–6.6%)      | 40.4 (16.8–70.5)       | -42.8% (-59.5 to -23.5%) | 4.4% (2.1–7%)      | 1.7 (0.8–2.9)    | -34.9% (-52.3 to -15.7%) |
| Particulate matter pollution               | Subarachnoid haemorrhage                | 3.4% (1.2–5.9%)    | 2.4 (0.9–4.7)          | -70.3% (-82.3 to -49.9%) | 4.1% (1.9–6.6%)    | 0.1 (0–0.2)      | -69.7% (-82.1 to -43%)   |
|                                            | Meningitis                              | 1.6% (0.9–2.7%)    | 1.1 (0.6–1.9)          | -85.4% (-94 to -65.4%)   | 1% (0.5–1.7%)      | <0.1 (<0.1–<0.1) | -85.4% (-94 to -65.4%)   |
|                                            | Encephalitis                            | 0.6% (0.3–1.2%)    | 0.5 (0.2–0.9)          | -35.3% (-76.1 to 67.1%)  | 0.4% (0.1–0.8%)    | <0.1 (<0.1–<0.1) | -35.3% (-76.1 to 67.1%)  |
|                                            | Stroke                                  | 31.4% (26.2–36.4%) | 917.9 (689.8–1178.5)   | -27.3% (-43.3 to -7.8%)  | 27.4% (22.4–32%)   | 39.2 (29.7–49.4) | -24.1% (-40.4 to -5.4%)  |
|                                            | Ischaemic stroke                        | 29.7% (24.6–34.6%) | 543.9 (414.4–681.4)    | -17.1% (-34.6 to 3%)     | 25.8% (21–30.2%)   | 26.1 (19.7–32.6) | -13.5% (-32.5 to 7.1%)   |
|                                            | Intracerebral haemorrhage               | 34.1% (28.7–39.3%) | 349 (254.3–465.6)      | -35% (-52.4 to -12.5%)   | 31.1% (25.8–36%)   | 12.4 (9.1–16.2)  | -35% (-52.1 to -13.7%)   |

**Table S16** Regional and national disabilities and deaths related to neurological conditions attributable to risk factors in North Africa and Middle East countries

| Location<br>Risk factor (alphabetic order) | Cause                                   | DALYs (95% UI)     |                     |                           | Deaths (95% UI)    |                  |                          |
|--------------------------------------------|-----------------------------------------|--------------------|---------------------|---------------------------|--------------------|------------------|--------------------------|
|                                            |                                         | PAF (%)            | Rate per 100,000    | Rate change (%)           | PAF (%)            | Rate per 100,000 | Rate change (%)          |
|                                            |                                         | 2019               | 2019                | From 1990 to 2019         | 2019               | 2019             | From 1990 to 2019        |
| Secondhand smoke                           | Subarachnoid haemorrhage                | 34.7% (29.3–40.1%) | 25.1 (17.6–35.9)    | -64.2% (-77.1 to -41.8%)  | 31.6% (26.3–36.7%) | 0.7 (0.5–1.1)    | -69.3% (-81.2 to -45%)   |
|                                            | Stroke                                  | 4.6% (3.5–5.8%)    | 134.8 (92.6–184.5)  | -24.3% (-42.3 to -3%)     | 4% (3–5.1%)        | 5.8 (4–7.7)      | -19.7% (-38 to 1.1%)     |
|                                            | Ischaemic stroke                        | 4.2% (3.1–5.4%)    | 77.2 (52.8–103.3)   | -11.9% (-32.3 to 12.8%)   | 3.7% (2.8–4.8%)    | 3.8 (2.6–4.9)    | -7.1% (-27.8 to 15.8%)   |
| Short gestation                            | Intracerebral haemorrhage               | 5.2% (3.9–6.6%)    | 53.6 (35.9–75.8)    | -32.5% (-51.2 to -7.4%)   | 4.7% (3.5–5.9%)    | 1.9 (1.3–2.6)    | -31.7% (-50.3 to -9.2%)  |
|                                            | Subarachnoid haemorrhage                | 5.7% (4.2–7.2%)    | 4.1 (2.6–6.1)       | -63.5% (-76.7 to -39.4%)  | 5.1% (3.8–6.5%)    | 0.1 (0.1–0.2)    | -67.4% (-79.7 to -41.9%) |
|                                            | Meningitis                              | 5.9% (3.8–8.5%)    | 4 (2.4–6.3)         | -81.5% (-90.7 to -63.8%)  | 3.6% (2.2–5.4%)    | <0.1 (<0.1–0.1)  | -81.5% (-90.7 to -63.8%) |
| Smoking                                    | Encephalitis                            | 2.4% (1.1–4%)      | 1.7 (0.6–3.1)       | -19.2% (-65.4 to 92.3%)   | 1.5% (0.6–2.6%)    | <0.1 (<0.1–<0.1) | -19.2% (-65.4 to 92.3%)  |
|                                            | Stroke                                  | 17.9% (16.1–19.7%) | 523.7 (409.6–649.5) | -31.6% (-48.8 to -9.9%)   | 14.3% (12.7–15.9%) | 20.5 (16.1–25)   | -28.7% (-46.3 to -6.7%)  |
|                                            | Ischaemic stroke                        | 16.4% (14.6–18.1%) | 299.4 (235–361.6)   | -22.7% (-41.2 to 1%)      | 12.7% (11.2–14.2%) | 12.8 (10.2–15.4) | -18.9% (-39.4 to 7.1%)   |
| Tobacco                                    | Intracerebral haemorrhage               | 20.7% (18.6–22.8%) | 211.8 (159.6–275.7) | -38.4% (-55.8 to -14.6%)  | 18.1% (16.2–20.2%) | 7.3 (5.5–9.3)    | -38% (-55 to -15.3%)     |
|                                            | Subarachnoid haemorrhage                | 17.2% (14.7–20.1%) | 12.4 (8.8–18.5)     | -63.8% (-79.4 to -35%)    | 16.5% (14–19.3%)   | 0.4 (0.3–0.6)    | -66.8% (-81.8 to -36.3%) |
|                                            | Neurological disorders*                 | 4.7% (1.5–10.2%)   | 62.4 (18.6–157.6)   | -12.1% (-27.6 to 4.4%)    | 9.6% (1.8–17%)     | 3.6 (0.2–11.1)   | -15.7% (-43.9 to 6.3%)   |
|                                            | Alzheimer's disease and other dementias | 18.7% (12.3–25%)   | 71.8 (28.4–166.4)   | -11.6% (-27.2 to 4%)      | 16.6% (10.9–22.5%) | 4.2 (1–11.9)     | -13.8% (-31.2 to 4.6%)   |
|                                            | Parkinson's disease                     | -13% (-19.8–7%)    | -11.1 (-17.8–5.9)   | -8.6% (-34.3 to 25.6%)    | -12% (-18.2–6.5%)  | -0.7 (-1.1–0.4)  | -2.9% (-30.8 to 37.5%)   |
|                                            | Multiple sclerosis                      | 12.1% (8.9–16.1%)  | 1.7 (1.1–2.6)       | -8.9% (-32.6 to 16.9%)    | 14.6% (10.2–20.7%) | <0.1 (<0.1–<0.1) | -14.9% (-49.3 to 32%)    |
|                                            | Stroke                                  | 21.7% (19.5–23.7%) | 633.8 (495.2–781.7) | -30% (-47.4 to -8.6%)     | 17.7% (15.8–19.5%) | 25.3 (20–30.8)   | -26.7% (-44.3 to -5.8%)  |
|                                            | Ischaemic stroke                        | 19.8% (17.8–21.8%) | 363.3 (288.4–438.9) | -20.5% (-39.1 to 2.3%)    | 15.9% (14.1–17.6%) | 16 (12.9–19.2)   | -16.3% (-36.2 to 8.5%)   |
|                                            | Intracerebral haemorrhage               | 24.9% (22.5–27.2%) | 254.6 (191.4–330)   | -37.1% (-54.7 to -14.2%)  | 22% (19.7–24.2%)   | 8.8 (6.7–11.1)   | -36.7% (-54.1 to -13.6%) |
|                                            | Subarachnoid haemorrhage                | 21.9% (19.2–25.1%) | 15.9 (11.3–23.4)    | -63.6% (-78.5 to -38.5%)  | 20.8% (18–23.6%)   | 0.5 (0.3–0.7)    | -66.9% (-81.4 to -37.5%) |
| Jordan                                     | Neurological disorders*                 | 4.7% (1.5–10.2%)   | 62.4 (18.6–157.6)   | -12.1% (-27.6 to 4.4%)    | 9.6% (1.8–17%)     | 3.6 (0.2–11.1)   | -15.7% (-43.9 to 6.3%)   |
|                                            | Alzheimer's disease and other dementias | 18.7% (12.3–25%)   | 71.8 (28.4–166.4)   | -11.6% (-27.2 to 4%)      | 16.6% (10.9–22.5%) | 4.2 (1–11.9)     | -13.8% (-31.2 to 4.6%)   |
|                                            | Parkinson's disease                     | -13% (-19.8–7%)    | -11.1 (-17.8–5.9)   | -8.6% (-34.3 to 25.6%)    | -12% (-18.2–6.5%)  | -0.7 (-1.1–0.4)  | -2.9% (-30.8 to 37.5%)   |
|                                            | Multiple sclerosis                      | 12.1% (8.9–16.1%)  | 1.7 (1.1–2.6)       | -8.9% (-32.6 to 16.9%)    | 14.6% (10.2–20.7%) | <0.1 (<0.1–<0.1) | -14.9% (-49.3 to 32%)    |
| Air pollution                              | Meningitis                              | 0.8% (0.3–1.5%)    | 0.4 (0.2–0.8)       | -59.9% (-87.5 to 36.2%)   | 0.5% (0.2–1%)      | <0.1 (<0.1–<0.1) | -59.9% (-87.5 to 36.2%)  |
|                                            | Encephalitis                            | 0.2% (0.1–0.4%)    | <0.1 (<0.1–<0.1)    | -73% (-93.5 to 37.6%)     | 0.2% (0.1–0.3%)    | <0.1 (<0.1–<0.1) | -73% (-93.5 to 37.6%)    |
|                                            | Stroke                                  | 22.6% (19.1–26.2%) | 328 (259.2–404.4)   | -49.5% (-58.7 to -39.1%)  | 19.2% (16–22.3%)   | 14.6 (11.2–18.4) | -49.8% (-60.2 to -38.1%) |
|                                            | Ischaemic stroke                        | 21.8% (18.3–25.2%) | 236.1 (185.7–292.6) | -45.1% (-55.3 to -34.3%)  | 18.5% (15.4–21.5%) | 11 (8.3–13.9)    | -46.3% (-58.2 to -33.7%) |
|                                            | Intracerebral haemorrhage               | 25% (21.2–28.6%)   | 81.3 (63.9–102.3)   | -59.3% (-67.5 to -48.8%)  | 21.6% (18.2–25%)   | 3.3 (2.5–4.2)    | -58.3% (-67.3 to -46.9%) |
|                                            | Subarachnoid haemorrhage                | 27.3% (23.3–31.3%) | 10.6 (8–13.5)       | -47.2% (-61.5 to -23.8%)  | 22.9% (19.4–26.5%) | 0.3 (0.2–0.4)    | -54.5% (-69.2 to -28.3%) |
| Alcohol use                                | Stroke                                  | 0.2% (-0.1–0.6%)   | 3.5 (1.6–9.2)       | -21.7% (-578.9 to 398.7%) | 0.1% (-0.1–0.4%)   | 0.1 (-0.1–0.3)   | -5.7% (-672.3 to 545.7%) |

**Table S16** Regional and national disabilities and deaths related to neurological conditions attributable to risk factors in North Africa and Middle East countries

| Location<br>Risk factor (alphabetic order) | Cause                                   | DALYs (95% UI)     |                      |                           | Deaths (95% UI)     |                  |                           |
|--------------------------------------------|-----------------------------------------|--------------------|----------------------|---------------------------|---------------------|------------------|---------------------------|
|                                            |                                         | PAF (%)            | Rate per 100,000     | Rate change (%)           | PAF (%)             | Rate per 100,000 | Rate change (%)           |
|                                            |                                         | 2019               | 2019                 | From 1990 to 2019         | 2019                | 2019             | From 1990 to 2019         |
| All risk factors                           | Ischaemic stroke                        | -0.1% (-0.3-0.3%)  | -0.5 (-3.6-3)        | -74.5% (-487.4 to 290.1%) | -0.1% (-0.3-0.1%)   | -0.1 (-0.2-0.1)  | -59.5% (-355.4 to 160.3%) |
|                                            | Intracerebral haemorrhage               | 1.2% (0.4-2.2%)    | 4 (1.4-7.3)          | -38.7% (-71.6 to 45.8%)   | 0.9% (0.3-1.6%)     | 0.1 (0-0.2)      | -39.8% (-73.9 to 50.2%)   |
|                                            | Neurological disorders*                 | 0.2% (0.1-0.5%)    | 2.4 (0.8-5.2)        | 6.3% (-60.5 to 176.6%)    | 0.1% (0-0.2%)       | <0.1 (<0.1-<0.1) | -9.8% (-48.1 to 67.7%)    |
|                                            | Idiopathic epilepsy                     | 2% (1-3.3%)        | 2.4 (0.8-5.2)        | 6.3% (-60.5 to 176.6%)    | 2.6% (1.3-4.3%)     | <0.1 (<0.1-<0.1) | -9.8% (-48.1 to 67.7%)    |
|                                            | Meningitis                              | 5.9% (3.5-9.7%)    | 3.1 (1.7-5.6)        | -61.7% (-83 to -11.6%)    | 3.7% (2.1-6.2%)     | <0.1 (<0.1-0.1)  | -61.7% (-83 to -11.6%)    |
|                                            | Encephalitis                            | 1.5% (0.8-2.6%)    | 0.2 (0.1-0.3)        | -73.7% (-90.9 to -5.6%)   | 1.2% (0.7-2.1%)     | <0.1 (<0.1-<0.1) | -73.7% (-90.9 to -5.5%)   |
|                                            | Stroke                                  | 87.8% (83.9-92%)   | 1271.7 (1063-1477.1) | -49.7% (-58.3 to -40.2%)  | 85.2% (79.5-91.5%)  | 64.5 (52.5-76.8) | -49.2% (-59 to -38.3%)    |
|                                            | Ischaemic stroke                        | 87.7% (82.9-93%)   | 950.6 (792.1-1107.1) | -45.8% (-55.8 to -35.6%)  | 85% (78.1-92.8%)    | 50.3 (40.7-60.5) | -46.2% (-57.5 to -34.3%)  |
|                                            | Intracerebral haemorrhage               | 88.2% (84.5-91.5%) | 287.4 (236.4-341.9)  | -59.5% (-67.5 to -49.8%)  | 85.9% (80.5-90.9%)  | 13.1 (10.6-15.8) | -57.9% (-66.7 to -47.2%)  |
|                                            | Subarachnoid haemorrhage                | 86.8% (82.5-90.1%) | 33.8 (26.2-41.2)     | -48.8% (-63.1 to -26%)    | 84.4% (78.8-89.5%)  | 1 (0.7-1.3)      | -54.5% (-69.3 to -29.7%)  |
|                                            | Neurological disorders*                 | 14% (5.8-27.8%)    | 176.8 (68.7-424.3)   | 7% (-9.1 to 30.7%)        | 32.9% (15.4-48.9%)  | 10.8 (2.1-31)    | 4.5% (-14 to 43%)         |
|                                            | Alzheimer's disease and other dementias | 48.9% (34.6-63.6%) | 181 (73.9-425.6)     | 3.5% (-11.6 to 22.9%)     | 47.2% (33.2-62.4%)  | 11.4 (2.6-31.3)  | 1.2% (-16.8 to 28.2%)     |
| Ambient particulate matter pollution       | Parkinson's disease                     | -13% (-19.7-6.5%)  | -9.7 (-15.4-4.7)     | -37.1% (-54.1 to -17.7%)  | -11.5% (-17.9-5.7%) | -0.6 (-0.9-0.3)  | -37.7% (-55.5 to -16.2%)  |
|                                            | Idiopathic epilepsy                     | 2% (1-3.3%)        | 2.4 (0.8-5.2)        | 6.3% (-60.5 to 176.6%)    | 2.6% (1.3-4.3%)     | <0.1 (<0.1-<0.1) | -9.8% (-48.1 to 67.7%)    |
|                                            | Multiple sclerosis                      | 15.8% (12.1-19.5%) | 3 (2-4.1)            | -9.9% (-29.5 to 16.2%)    | 17.2% (12.6-21.8%)  | <0.1 (<0.1-<0.1) | -16.9% (-45.6 to 18.9%)   |
|                                            | Meningitis                              | 0.8% (0.3-1.5%)    | 0.4 (0.2-0.8)        | -58.2% (-86.7 to 42.4%)   | 0.5% (0.2-1%)       | <0.1 (<0.1-<0.1) | -58.2% (-86.7 to 42.3%)   |
|                                            | Encephalitis                            | 0.2% (0.1-0.4%)    | <0.1 (<0.1-<0.1)     | -71.9% (-93.2 to 42.8%)   | 0.2% (0.1-0.3%)     | <0.1 (<0.1-<0.1) | -71.9% (-93.2 to 42.8%)   |
|                                            | Stroke                                  | 22.6% (19.1-26.1%) | 327.8 (259-404.2)    | -47.7% (-57.5 to -36.8%)  | 19.2% (16-22.3%)    | 14.6 (11.2-18.4) | -48% (-58.8 to -35.8%)    |
|                                            | Ischaemic stroke                        | 21.8% (18.3-25.2%) | 236 (185.5-292.5)    | -43.2% (-53.5 to -31.8%)  | 18.5% (15.4-21.5%)  | 11 (8.3-13.9)    | -44.4% (-56.5 to -30.9%)  |
|                                            | Intracerebral haemorrhage               | 24.9% (21.2-28.6%) | 81.2 (63.8-102.2)    | -57.9% (-66.4 to -46.7%)  | 21.6% (18.2-24.9%)  | 3.3 (2.5-4.2)    | -56.8% (-66.1 to -45.3%)  |
|                                            | Subarachnoid haemorrhage                | 27.3% (23.3-31.3%) | 10.6 (8-13.5)        | -45.3% (-60.3 to -20.3%)  | 22.9% (19.4-26.5%)  | 0.3 (0.2-0.4)    | -52.9% (-68.4 to -25.8%)  |
|                                            | Meningitis                              | 5.7% (3.4-9.4%)    | 3 (1.7-5.5)          | -61.5% (-83.1 to -10.9%)  | 3.6% (2.1-6%)       | <0.1 (<0.1-0.1)  | -61.5% (-83.1 to -10.9%)  |
|                                            | Encephalitis                            | 1.5% (0.8-2.5%)    | 0.2 (0.1-0.3)        | -73.5% (-90.7 to -6.1%)   | 1.2% (0.7-2%)       | <0.1 (<0.1-<0.1) | -73.5% (-90.7 to -6.1%)   |
|                                            | Stroke                                  | 39.7% (34.6-45.1%) | 575.7 (457.5-701.5)  | -53.9% (-62.9 to -44.7%)  | 35.2% (29.7-41.1%)  | 26.6 (20.1-33.3) | -53.7% (-63.9 to -43.5%)  |
| Behavioural risk factors‡                  | Ischaemic stroke                        | 40% (33.8-46.7%)   | 433.5 (337.9-544.6)  | -50% (-59.8 to -40.4%)    | 35.8% (29.4-43%)    | 21.2 (15.6-26.9) | -50.4% (-61.7 to -39.2%)  |
|                                            | Intracerebral haemorrhage               | 38.7% (33.4-44.7%) | 126.2 (97.6-157)     | -63.7% (-71.5 to -54.4%)  | 32.9% (27.7-38.8%)  | 5 (3.8-6.3)      | -63.4% (-71.4 to -53.7%)  |
|                                            | Subarachnoid haemorrhage                | 41% (35.4-46.9%)   | 15.9 (11.8-20.2)     | -53.4% (-67.5 to -32.3%)  | 34.8% (29.4-40.8%)  | 0.4 (0.3-0.6)    | -60% (-74.2 to -38.2%)    |
|                                            | Neurological disorders*                 | 6.1% (2.3-12.8%)   | 77.7 (28.3-183.9)    | -15.9% (-32.4 to 6.4%)    | 13.3% (4-21.7%)     | 4.5 (0.5-13.3)   | -19.8% (-39.3 to 14.6%)   |
|                                            | Alzheimer's disease and other dementias | 22.2% (14.7-29.6%) | 81.9 (33.1-185.3)    | -19.7% (-35.1 to -3.1%)   | 20.8% (13.5-28.5%)  | 5 (1.2-13.7)     | -22.4% (-39.6 to -2.3%)   |
|                                            | Parkinson's disease                     | -13% (-19.7-6.5%)  | -9.7 (-15.4-4.7)     | -37.1% (-54.1 to -17.7%)  | -11.5% (-17.9-5.7%) | -0.6 (-0.9-0.3)  | -37.7% (-55.5 to -16.2%)  |
|                                            | Idiopathic epilepsy                     | 2% (1-3.3%)        | 2.4 (0.8-5.2)        | 6.3% (-60.5 to 176.6%)    | 2.6% (1.3-4.3%)     | <0.1 (<0.1-<0.1) | -9.8% (-48.1 to 67.7%)    |



**Table S16** Regional and national disabilities and deaths related to neurological conditions attributable to risk factors in North Africa and Middle East countries

| Location<br>Risk factor (alphabetic order) | Cause                     | DALYs (95% UI)     |                     |                          | Deaths (95% UI)    |                  |                          |
|--------------------------------------------|---------------------------|--------------------|---------------------|--------------------------|--------------------|------------------|--------------------------|
|                                            |                           | PAF (%)            | Rate per 100,000    | Rate change (%)          | PAF (%)            | Rate per 100,000 | Rate change (%)          |
|                                            |                           | 2019               | 2019                | From 1990 to 2019        | 2019               | 2019             | From 1990 to 2019        |
| Child and maternal malnutrition            | Multiple sclerosis        | 15.8% (12.1–19.5%) | 3 (2–4.1)           | -9.9% (-29.5 to 16.2%)   | 17.2% (12.6–21.8%) | <0.1 (<0.1–<0.1) | -16.9% (-45.6 to 18.9%)  |
|                                            | Meningitis                | 5.7% (3.4–9.4%)    | 3 (1.7–5.5)         | -61.5% (-83.1 to -10.9%) | 3.6% (2.1–6%)      | <0.1 (<0.1–0.1)  | -61.5% (-83.1 to -10.9%) |
|                                            | Encephalitis              | 1.5% (0.8–2.5%)    | 0.2 (0.1–0.3)       | -73.5% (-90.7 to -6.1%)  | 1.2% (0.7–2%)      | <0.1 (<0.1–<0.1) | -73.5% (-90.7 to -6.1%)  |
| Diet high in red meat                      | Stroke                    | 3.4% (1.2–5.1%)    | 48.8 (16.8–77.1)    | -52.4% (-62.7 to -41%)   | 2.6% (0.9–4%)      | 2 (0.7–3.1)      | -52.4% (-63.2 to -38.9%) |
|                                            | Ischaemic stroke          | 3% (0.5–4.7%)      | 32.9 (5–54.1)       | -47.4% (-57.1 to -35.7%) | 2.3% (0.4–3.7%)    | 1.4 (0.2–2.3)    | -48.3% (-59.5 to -33.6%) |
|                                            | Intracerebral haemorrhage | 4.3% (0.6–6.9%)    | 14 (2–23.7)         | -61.3% (-69.2 to -51%)   | 3.5% (0.5–5.7%)    | 0.5 (0.1–0.9)    | -60.1% (-68.8 to -48.6%) |
| Diet high in sodium                        | Subarachnoid haemorrhage  | 5.1% (0.7–8.1%)    | 2 (0.3–3.4)         | -49.2% (-62.3 to -24%)   | 3.9% (0.6–6.3%)    | <0.1 (<0.1–0.1)  | -56.7% (-70.4 to -30.6%) |
|                                            | Stroke                    | 1.8% (0.3–7.2%)    | 26.3 (3.8–103.3)    | -49.4% (-72.5 to -11.6%) | 1.5% (0.3–6%)      | 1.1 (0.2–4.4)    | -49.9% (-74 to -13.1%)   |
|                                            | Ischaemic stroke          | 1.7% (0.3–6.6%)    | 18.2 (2.8–72)       | -45.3% (-70.6 to -6.1%)  | 1.4% (0.3–5.4%)    | 0.8 (0.2–3.2)    | -46.5% (-72.3 to -6.7%)  |
| Diet low in fibre                          | Intracerebral haemorrhage | 2.2% (0.3–8.7%)    | 7.2 (0.8–29)        | -57.8% (-78.5 to -26.1%) | 1.9% (0.3–7.6%)    | 0.3 (0–1.2)      | -57.3% (-77.5 to -23.9%) |
|                                            | Subarachnoid haemorrhage  | 2.3% (0.3–9%)      | 0.9 (0.1–3.5)       | -46.5% (-73.9 to 0.7%)   | 2% (0.3–8.1%)      | <0.1 (<0.1–0.1)  | -53.2% (-77.3 to -6.6%)  |
|                                            | Stroke                    | 3.2% (0.7–6.2%)    | 46.7 (9.6–89.8)     | -61.7% (-70.2 to -52.6%) | 2.7% (0.6–5.3%)    | 2.1 (0.5–4.1)    | -62.5% (-72.1 to -51.9%) |
| Diet low in fruits                         | Ischaemic stroke          | 3.1% (0.6–5.9%)    | 33.2 (7.1–64.3)     | -58.4% (-67.8 to -48.9%) | 2.6% (0.6–5%)      | 1.5 (0.3–3)      | -60% (-71.1 to -47.9%)   |
|                                            | Intracerebral haemorrhage | 3.6% (0.7–7%)      | 11.8 (2.3–23.5)     | -68.9% (-76.7 to -60.4%) | 3.2% (0.7–6.3%)    | 0.5 (0.1–1)      | -68.3% (-76.4 to -58.9%) |
|                                            | Subarachnoid haemorrhage  | 4.3% (0.8–8.2%)    | 1.7 (0.3–3.2)       | -59.1% (-71.5 to -40.4%) | 3.5% (0.7–6.7%)    | <0.1 (<0.1–0.1)  | -65.6% (-77.6 to -45.9%) |
| Diet low in vegetables                     | Stroke                    | 5% (2.1–8.4%)      | 72.8 (30.1–125.6)   | -50.6% (-60.8 to -39.6%) | 4% (1.6–6.8%)      | 3.1 (1.2–5.5)    | -51.7% (-62.5 to -38.9%) |
|                                            | Ischaemic stroke          | 4.2% (1–8%)        | 45.2 (10.4–91)      | -44.8% (-55.4 to -28.9%) | 3.4% (0.8–6.5%)    | 2 (0.4–4)        | -47.5% (-59.1 to -31.3%) |
|                                            | Intracerebral haemorrhage | 7.4% (3.4–13.9%)   | 24.3 (10.8–47)      | -59% (-67.4 to -47.5%)   | 6.4% (2.9–12.1%)   | 1 (0.4–1.9)      | -58.3% (-67.1 to -45.8%) |
| Diet low in whole grains                   | Subarachnoid haemorrhage  | 8.6% (4–15.9%)     | 3.3 (1.5–6.5)       | -46.2% (-60.9 to -22.4%) | 6.9% (3.2–12.9%)   | 0.1 (0–0.2)      | -54.3% (-69.1 to -29.2%) |
|                                            | Stroke                    | 1.9% (0.6–3.5%)    | 27.7 (7.5–51.2)     | -58.7% (-69.2 to -47.5%) | 1.7% (0.5–3%)      | 1.3 (0.4–2.3)    | -59.2% (-70.3 to -47.8%) |
|                                            | Ischaemic stroke          | 1.7% (0.2–3.4%)    | 18.8 (2.4–37.2)     | -53.7% (-64.9 to -41.3%) | 1.5% (0.2–2.9%)    | 0.9 (0.1–1.8)    | -55.2% (-67.9 to -42.2%) |
| Dietary risks                              | Intracerebral haemorrhage | 2.4% (0.2–6.6%)    | 7.9 (0.7–20.7)      | -67.2% (-77.6 to -56.5%) | 2.3% (0.2–5.9%)    | 0.4 (0–0.9)      | -66.5% (-77.5 to -55.1%) |
|                                            | Subarachnoid haemorrhage  | 2.6% (0.2–7.2%)    | 1 (0.1–2.9)         | -58% (-73.7 to -39.2%)   | 2.4% (0.2–6.3%)    | <0.1 (<0.1–0.1)  | -63.8% (-78.5 to -43.2%) |
|                                            | Stroke                    | 7% (4.1–8.8%)      | 101.4 (57.6–136.3)  | -46.7% (-56.5 to -37%)   | 6.6% (4.1–8.2%)    | 5 (3–6.7)        | -47.6% (-58.5 to -35.9%) |
| Environmental/occupational risk factors§   | Ischaemic stroke          | 9.4% (5.4–11.8%)   | 101.4 (57.6–136.3)  | -46.7% (-56.5 to -37%)   | 8.5% (5.2–10.5%)   | 5 (3–6.7)        | -47.6% (-58.5 to -35.9%) |
|                                            | Stroke                    | 20.3% (15.1–25.7%) | 293.3 (210–390.7)   | -52.3% (-60.9 to -42.9%) | 17.8% (13.3–22.5%) | 13.5 (9.5–18.1)  | -52.8% (-62.3 to -42.2%) |
|                                            | Ischaemic stroke          | 20.8% (14.8–26.5%) | 225.4 (152.9–305.1) | -48.6% (-57.8 to -38.9%) | 18.2% (13.4–23.1%) | 10.8 (7.3–14.4)  | -49.9% (-60.7 to -38.9%) |
| Environmental/occupational risk factors§   | Intracerebral haemorrhage | 18.4% (11.5–26%)   | 59.9 (37.3–85.7)    | -62.4% (-70 to -52.7%)   | 16.2% (10.1–23.2%) | 2.5 (1.5–3.6)    | -61.7% (-69.9 to -51.3%) |
|                                            | Subarachnoid haemorrhage  | 20.7% (13.2–28.8%) | 8.1 (4.9–11.7)      | -51.1% (-64.7 to -28.2%) | 17.3% (10.9–24.5%) | 0.2 (0.1–0.3)    | -58.3% (-71.9 to -34.5%) |
|                                            | Meningitis                | 0.8% (0.3–1.5%)    | 0.4 (0.2–0.8)       | -59.9% (-87.5 to 36.2%)  | 0.5% (0.2–1%)      | <0.1 (<0.1–<0.1) | -59.9% (-87.5 to 36.2%)  |
| Environmental/occupational risk factors§   | Encephalitis              | 0.2% (0.1–0.4%)    | <0.1 (<0.1–<0.1)    | -73% (-93.5 to 37.6%)    | 0.2% (0.1–0.3%)    | <0.1 (<0.1–<0.1) | -73% (-93.5 to 37.6%)    |
|                                            | Stroke                    | 29% (24.8–33.3%)   | 419.8 (330.3–512.9) | -50.9% (-59.7 to -40.9%) | 27% (22.6–31.5%)   | 20.4 (15.8–25.6) | -49.7% (-59.5 to -38.6%) |
|                                            | Ischaemic stroke          | 28% (23.9–32.2%)   | 303.9 (239.7–371.2) | -46.5% (-56.3 to -36%)   | 26.3% (21.9–30.7%) | 15.6 (11.9–19.7) | -46.3% (-57.4 to -34%)   |



**Table S16** Regional and national disabilities and deaths related to neurological conditions attributable to risk factors in North Africa and Middle East countries

| Location<br>Risk factor (alphabetic order) | Cause                                   | DALYs (95% UI)     |                     |                          | Deaths (95% UI)    |                  |                          |
|--------------------------------------------|-----------------------------------------|--------------------|---------------------|--------------------------|--------------------|------------------|--------------------------|
|                                            |                                         | PAF (%)            | Rate per 100,000    | Rate change (%)          | PAF (%)            | Rate per 100,000 | Rate change (%)          |
|                                            |                                         | 2019               | 2019                | From 1990 to 2019        | 2019               | 2019             | From 1990 to 2019        |
| High body-mass index                       | Intracerebral haemorrhage               | 31.7% (27.1–36.1%) | 103.3 (80.3–128.5)  | -60.4% (-68.3 to -50.3%) | 29.4% (24.8–34.1%) | 4.5 (3.4–5.6)    | -58.6% (-67.2 to -47.6%) |
|                                            | Subarachnoid haemorrhage                | 32.7% (28.2–37.1%) | 12.7 (9.5–16.1)     | -50.1% (-64.2 to -27.2%) | 30.5% (25.8–35.1%) | 0.4 (0.3–0.5)    | -55% (-69.6 to -29.9%)   |
|                                            | Stroke                                  | 36% (25.5–45.1%)   | 522 (358.2–687.1)   | -41.6% (-53.3 to -26%)   | 24.1% (15.9–32.5%) | 18.2 (11.1–25.6) | -42.3% (-55.5 to -25.4%) |
|                                            | Ischaemic stroke                        | 31% (21.3–40%)     | 335.5 (221.9–454.8) | -33% (-46.5 to -15.7%)   | 20.5% (12.8–29.7%) | 12.1 (7–17.9)    | -35% (-51 to -15.2%)     |
|                                            | Intracerebral haemorrhage               | 50.2% (37.4–61.3%) | 163.5 (115.3–214)   | -53.9% (-63.6 to -40.3%) | 36.6% (25–48.9%)   | 5.6 (3.6–7.8)    | -53.2% (-63.8 to -39.1%) |
|                                            | Subarachnoid haemorrhage                | 59% (46.1–69%)     | 23 (16.5–29.4)      | -39.9% (-56.4 to -12.7%) | 41.7% (29.7–53.3%) | 0.5 (0.3–0.7)    | -48.4% (-65 to -18.7%)   |
|                                            | Neurological disorders*                 | 6.9% (2.1–15.2%)   | 87.5 (24.3–219.2)   | 38.7% (12.8 to 89.7%)    | 16.8% (6–29.9%)    | 5.4 (0.9–15.8)   | 35.7% (5.7 to 97.3%)     |
| High fasting plasma glucose                | Alzheimer's disease and other dementias | 23.6% (10.4–40.2%) | 87.5 (24.3–219.2)   | 38.7% (12.8 to 89.7%)    | 22.6% (9.8–38.8%)  | 5.4 (0.9–15.8)   | 35.7% (5.7 to 97.3%)     |
|                                            | Stroke                                  | 29.9% (18–47.8%)   | 432.5 (257.9–673.1) | -40.4% (-55.6 to -20.8%) | 29.8% (16.2–53%)   | 22.5 (12.3–40.8) | -41.3% (-56.9 to -21.1%) |
|                                            | Ischaemic stroke                        | 30.6% (15.9–53.8%) | 331.5 (170.6–568.2) | -37.3% (-53 to -17.1%)   | 30.1% (14.4–59.8%) | 17.8 (8.4–35.4)  | -38.7% (-55.2 to -18.3%) |
|                                            | Intracerebral haemorrhage               | 28.2% (17.8–40.2%) | 91.9 (54.7–139.4)   | -49.8% (-63.6 to -30.7%) | 29% (17.4–45%)     | 4.4 (2.5–7.1)    | -49.7% (-64 to -29.1%)   |
|                                            | Subarachnoid haemorrhage                | 23.5% (15.4–33.3%) | 9.2 (5.5–13.7)      | -38.4% (-59.3 to -8.4%)  | 27.8% (16.9–41.5%) | 0.3 (0.2–0.6)    | -44.9% (-64.9 to -10.4%) |
|                                            | Neurological disorders*                 | 4.1% (0.7–11.5%)   | 51.9 (9.3–162.6)    | 27.1% (9.2 to 57.1%)     | 10.3% (2.3–23%)    | 3.3 (0.4–11.6)   | 25.4% (4.3 to 65.4%)     |
| High LDL cholesterol                       | Alzheimer's disease and other dementias | 14% (3.5–28.8%)    | 51.9 (9.3–162.6)    | 27.1% (9.2 to 57.1%)     | 13.8% (3.5–28.5%)  | 3.3 (0.4–11.6)   | 25.4% (4.3 to 65.4%)     |
|                                            | Stroke                                  | 18.3% (9.8–31.8%)  | 264.8 (137.4–468.4) | -43.4% (-53.7 to -32.7%) | 16.6% (5.5–35%)    | 12.6 (4.1–26.6)  | -44.1% (-56.9 to -32%)   |
| High systolic blood pressure               | Ischaemic stroke                        | 24.4% (13.2–42.5%) | 264.8 (137.4–468.4) | -43.4% (-53.7 to -32.7%) | 21.2% (7.1–44.3%)  | 12.6 (4.1–26.6)  | -44.1% (-56.9 to -32%)   |
|                                            | Stroke                                  | 52% (42.8–60.6%)   | 752.3 (585.1–924.9) | -49.4% (-60.1 to -37.2%) | 48.2% (38.2–59.3%) | 36.5 (27.4–47.9) | -49.3% (-61 to -35.2%)   |
| High temperature                           | Ischaemic stroke                        | 50% (39.2–60.5%)   | 541.9 (403.8–685.9) | -45% (-56.8 to -31.7%)   | 46.2% (34.6–58.9%) | 27.4 (19–37.5)   | -46% (-59.2 to -29.8%)   |
|                                            | Intracerebral haemorrhage               | 57.7% (47.6–67.7%) | 188.1 (140.8–233.9) | -58.8% (-68.4 to -47.1%) | 55.5% (43–67.8%)   | 8.5 (6.1–11)     | -57.4% (-67.9 to -45%)   |
|                                            | Subarachnoid haemorrhage                | 57.4% (47.2–67%)   | 22.3 (16.5–28.5)    | -47.6% (-62.8 to -23.7%) | 55.7% (44.7–67.5%) | 0.7 (0.5–0.9)    | -53.5% (-69.4 to -27.3%) |
|                                            | Stroke                                  | 0.4% (-0.3–1.4%)   | 6.2 (-4–19.8)       | 13.1% (-559.6 to 703%)   | 0.5% (-0.3–1.7%)   | 0.4 (-0.3–1.3)   | 24% (-609.2 to 760.5%)   |
|                                            | Ischaemic stroke                        | 0.4% (-0.3–1.3%)   | 4.5 (-2.9–14.4)     | 21.8% (-599.5 to 774.1%) | 0.5% (-0.3–1.7%)   | 0.3 (-0.2–1)     | 30.9% (-641.4 to 823.3%) |
| Household air pollution from solid fuels   | Intracerebral haemorrhage               | 0.5% (-0.3–1.6%)   | 1.6 (-1.5–2)        | -5.1% (-504.6 to 537.8%) | 0.5% (-0.3–1.7%)   | 0.1 (-0.1–0.3)   | 3.8% (-531.2 to 583.1%)  |
|                                            | Subarachnoid haemorrhage                | 0.4% (-0.3–1.3%)   | 0.2 (-0.1–0.5)      | 3.9% (-534 to 653.2%)    | 0.5% (-0.3–1.7%)   | <0.1 (<0.1–<0.1) | 11% (-562.1 to 744.1%)   |
|                                            | Meningitis                              | 0% (0–0%)          | <0.1 (<0.1–<0.1)    | -99.4% (-99.9 to -97.3%) | 0% (0–0%)          | <0.1 (<0.1–<0.1) | -99.4% (-99.9 to -97.3%) |
|                                            | Encephalitis                            | 0% (0–0%)          | <0.1 (<0.1–<0.1)    | -99.6% (-99.9 to -97.3%) | 0% (0–0%)          | <0.1 (<0.1–<0.1) | -99.6% (-99.9 to -97.3%) |
|                                            | Stroke                                  | 0% (0–0%)          | 0.2 (0.1–0.4)       | -99.3% (-99.7 to -98.1%) | 0% (0–0%)          | <0.1 (<0.1–<0.1) | -99.3% (-99.7 to -98.1%) |
|                                            | Ischaemic stroke                        | 0% (0–0%)          | 0.1 (0–0.3)         | -99.2% (-99.7 to -97.9%) | 0% (0–0%)          | <0.1 (<0.1–<0.1) | -99.2% (-99.7 to -97.9%) |
|                                            | Intracerebral haemorrhage               | 0% (0–0%)          | <0.1 (<0.1–0.1)     | -99.4% (-99.8 to -98.4%) | 0% (0–0%)          | <0.1 (<0.1–<0.1) | -99.4% (-99.8 to -98.4%) |
| Kidney dysfunction                         | Subarachnoid haemorrhage                | 0% (0–0%)          | <0.1 (<0.1–<0.1)    | -99.2% (-99.7 to -97.9%) | 0% (0–0%)          | <0.1 (<0.1–<0.1) | -99.3% (-99.8 to -98.2%) |
|                                            | Stroke                                  | 12.9% (9.8–15.8%)  | 187.6 (135.7–240)   | -33.7% (-47.2 to -20.5%) | 11.7% (7.3–15.5%)  | 8.8 (5.3–12.3)   | -34.2% (-50.6 to -18.3%) |

**Table S16** Regional and national disabilities and deaths related to neurological conditions attributable to risk factors in North Africa and Middle East countries

| Location<br>Risk factor (alphabetic order) | Cause                                   | DALYs (95% UI)     |                     |                          | Deaths (95% UI)          |                  |                          |
|--------------------------------------------|-----------------------------------------|--------------------|---------------------|--------------------------|--------------------------|------------------|--------------------------|
|                                            |                                         | PAF (%)            | Rate per 100,000    | Rate change (%)          | PAF (%)                  | Rate per 100,000 | Rate change (%)          |
|                                            |                                         | 2019               | 2019                | From 1990 to 2019        | 2019                     | 2019             | From 1990 to 2019        |
| Lead exposure                              | Ischaemic stroke                        | 13.7% (9.7–17.3%)  | 148.9 (99.9–195.5)  | -29.2% (-44.3 to -14.9%) | 11.6% (6.1–16.2%)        | 6.9 (3.4–10)     | -31.6% (-50.7 to -14.5%) |
|                                            | Intracerebral haemorrhage               | 11.9% (9.4–14.5%)  | 38.7 (28.5–50.7)    | -46.8% (-57.9 to -32.5%) | 13% (9.6–16.4%)          | 2 (1.3–2.7)      | -41.9% (-54.7 to -25%)   |
|                                            | Stroke                                  | 2.9% (1.2–4.7%)    | 41.4 (16.9–70)      | -60.7% (-71 to -51.7%)   | 3% (1.4–4.8%)            | 2.3 (1–3.8)      | -54.5% (-65.3 to -43.9%) |
|                                            | Ischaemic stroke                        | 2.8% (1.2–4.7%)    | 30.7 (12.3–52.1)    | -55.4% (-66.6 to -45.7%) | 2.9% (1.3–4.8%)          | 1.7 (0.8–3)      | -50% (-62.7 to -37.1%)   |
|                                            | Intracerebral haemorrhage               | 3% (1.5–4%)        | 9.8 (3.3–17.9)      | -70.9% (-79.9 to -61.9%) | 3.4% (1.3–5.8%)          | 0.5 (0.2–0.9)    | -64.7% (-74 to -54.4%)   |
| Low birth weight                           | Subarachnoid haemorrhage                | 2.5% (0.7–4.8%)    | 1 (0.3–1.9)         | -68.8% (-82.6 to -54.5%) | 3.2% (1.2–5.6%)          | <0.1 (<0.1–0.1)  | -63.6% (-78.1 to -43.2%) |
|                                            | Meningitis                              | 5.4% (3.2–8.9%)    | 2.9 (1.6–5.2)       | -61.4% (-82.9 to -9.4%)  | 3.4% (2–5.7%)            | <0.1 (<0.1–0.1)  | -61.4% (-82.9 to -9.4%)  |
|                                            | Encephalitis                            | 1.4% (0.8–2.4%)    | 0.2 (0.1–0.3)       | -73.4% (-90.7 to -6.1%)  | 1.1% (0.6–1.9%)          | <0.1 (<0.1–<0.1) | -73.4% (-90.7 to -6.1%)  |
| Low birth weight and short gestation       | Meningitis                              | 5.7% (3.4–9.4%)    | 3 (1.7–5.5)         | -61.5% (-83.1 to -10.9%) | 3.6% (2.1–6%)            | <0.1 (<0.1–0.1)  | -61.5% (-83.1 to -10.9%) |
|                                            | Encephalitis                            | 1.5% (0.8–2.5%)    | 0.2 (0.1–0.3)       | -73.5% (-90.7 to -6.1%)  | 1.2% (0.7–2%)            | <0.1 (<0.1–<0.1) | -73.5% (-90.7 to -6.1%)  |
| Low physical activity                      | Stroke                                  | 5.2% (1.1–11.9%)   | 75 (15.3–171.4)     | -36.9% (-51.2 to -17.5%) | 6.5% (1.4–14%)           | 4.9 (1.1–10.6)   | -38% (-52.5 to -17.1%)   |
| Low temperature                            | Ischaemic stroke                        | 6.9% (1.5–15.9%)   | 75 (15.3–171.4)     | -36.9% (-51.2 to -17.5%) | 8.3% (1.8–17.9%)         | 4.9 (1.1–10.6)   | -38% (-52.5 to -17.1%)   |
|                                            | Stroke                                  | 5% (1.3–9.4%)      | 73 (17.3–141)       | -54.4% (-64.8 to -42.3%) | 6.3% (1.6–11.6%)         | 4.8 (1.1–9.1)    | -50.1% (-61.2 to -37.7%) |
|                                            | Ischaemic stroke                        | 4.9% (1.2–9.1%)    | 52.7 (12.5–100.5)   | -50.7% (-63.1 to -37.8%) | 6.3% (1.6–11.6%)         | 3.7 (0.9–7)      | -47.1% (-59.8 to -34.2%) |
|                                            | Intracerebral haemorrhage               | 5.7% (1.4–10.6%)   | 18.5 (4.5–35.6)     | -62% (-70.5 to -50.6%)   | 6.3% (1.6–11.6%)         | 1 (0.2–1.8)      | -58.6% (-67.7 to -46.7%) |
|                                            | Subarachnoid haemorrhage                | 4.5% (1.2–8.4%)    | 1.8 (0.4–3.4)       | -58% (-72 to -33.6%)     | 6.3% (1.6–11.6%)         | 0.1 (0–0.1)      | -55.1% (-69.9 to -28.8%) |
| Metabolic risk factors†                    | Stroke                                  | 76.3% (69–84.1%)   | 1104.2 (914–1305.6) | -47.6% (-56.9 to -37.3%) | 72.1% (61.5–83.2%)       | 54.6 (43–66.8)   | -47.4% (-57.7 to -35.1%) |
|                                            | Ischaemic stroke                        | 76.1% (66.8–86%)   | 824.1 (669.8–982.2) | -43.7% (-54.1 to -33.1%) | 71.5% (59.2–85.6%)       | 42.4 (32.1–53.3) | -44.4% (-56.3 to -30.7%) |
|                                            | Intracerebral haemorrhage               | 77.1% (69.8–83.5%) | 251.1 (201.8–302.5) | -57.5% (-66 to -47.1%)   | 74.2% (65.2–82.5%)       | 11.3 (8.9–14)    | -56% (-65.4 to -44.6%)   |
|                                            | Subarachnoid haemorrhage                | 74.5% (66.9–81.3%) | 29 (22.4–35.8)      | -45.9% (-60.9 to -21.4%) | 71.1% (61.9–79.9%)       | 0.9 (0.6–1.1)    | -52.4% (-67.9 to -26.1%) |
|                                            | Neurological disorders*                 | 10.1% (3.4–21.1%)  | 127.1 (40.6–314.5)  | 30.8% (10.5 to 64.5%)    | 24.7% (10.4–41.5%)       | 8 (1.4–23.7)     | 28.2% (4.9 to 72.3%)     |
|                                            | Alzheimer's disease and other dementias | 34.3% (17.8–52.5%) | 127.1 (40.6–314.5)  | 30.8% (10.5 to 64.5%)    | 33.2% (16.5–51.6%)       | 8 (1.4–23.7)     | 28.2% (4.9 to 72.3%)     |
|                                            | Non-optimal temperature                 | Stroke             | 5.5% (2.1–9.3%)     | 78.9 (29.9–138.7)        | -52.2% (-63.7 to -32.3%) | 6.8% (2.6–11.5%) | 5.1 (2–8.9)              |
| Other environmental risks                  | Ischaemic stroke                        | 5.3% (2–9.1%)      | 57 (21.5–99.4)      | -48.4% (-61.8 to -28%)   | 6.8% (2.6–11.5%)         | 4 (1.5–7)        | -44.7% (-58.5 to -23%)   |
|                                            | Intracerebral haemorrhage               | 6.1% (2.4–10.6%)   | 20 (7.6–35.7)       | -60.2% (-69.6 to -43.2%) | 6.8% (2.6–11.5%)         | 1 (0.4–1.8)      | -56.7% (-66.8 to -37.8%) |
|                                            | Subarachnoid haemorrhage                | 4.9% (1.9–8.4%)    | 1.9 (0.7–3.4)       | -56% (-71.1 to -25.8%)   | 6.8% (2.6–11.5%)         | 0.1 (0–0.1)      | -53% (-69.2 to -23.2%)   |
|                                            | Stroke                                  | 2.9% (1.2–4.7%)    | 41.4 (16.9–70)      | -60.7% (-71 to -51.7%)   | 3% (1.4–4.8%)            | 2.3 (1–3.8)      | -54.5% (-65.3 to -43.9%) |
|                                            | Ischaemic stroke                        | 2.8% (1.2–4.7%)    | 30.7 (12.3–52.1)    | -55.4% (-66.6 to -45.7%) | 2.9% (1.3–4.8%)          | 1.7 (0.8–3)      | -50% (-62.7 to -37.1%)   |
| Particulate matter pollution               | Intracerebral haemorrhage               | 3% (1.5–4%)        | 9.8 (3.3–17.9)      | -70.9% (-79.9 to -61.9%) | 3.4% (1.3–5.8%)          | 0.5 (0.2–0.9)    | -64.7% (-74 to -54.4%)   |
|                                            | Subarachnoid haemorrhage                | 2.5% (0.7–4.8%)    | 1 (0.3–1.9)         | -68.8% (-82.6 to -54.5%) | 3.2% (1.2–5.6%)          | <0.1 (<0.1–0.1)  | -63.6% (-78.1 to -43.2%) |
|                                            | Meningitis                              | 0.8% (0.3–1.5%)    | 0.4 (0.2–0.8)       | -59.9% (-87.5 to 36.2%)  | 0.5% (0.2–1%)            | <0.1 (<0.1–<0.1) | -59.9% (-87.5 to 36.2%)  |
|                                            | Encephalitis                            | 0.2% (0.1–0.4%)    | <0.1 (<0.1–<0.1)    | -73% (-93.5 to 37.6%)    | 0.2% (0.1–0.3%)          | <0.1 (<0.1–<0.1) | -73% (-93.5 to 37.6%)    |

**Table S16** Regional and national disabilities and deaths related to neurological conditions attributable to risk factors in North Africa and Middle East countries

| Location<br>Risk factor (alphabetic order) | Cause                                   | DALYs (95% UI)     |                     |                          | Deaths (95% UI)     |                  |                          |
|--------------------------------------------|-----------------------------------------|--------------------|---------------------|--------------------------|---------------------|------------------|--------------------------|
|                                            |                                         | PAF (%)            | Rate per 100,000    | Rate change (%)          | PAF (%)             | Rate per 100,000 | Rate change (%)          |
|                                            |                                         | 2019               | 2019                | From 1990 to 2019        | 2019                | 2019             | From 1990 to 2019        |
| Secondhand smoke                           | Stroke                                  | 22.6% (19.1–26.2%) | 328 (259.2–404.4)   | -49.5% (-58.7 to -39.1%) | 19.2% (16–22.3%)    | 14.6 (11.2–18.4) | -49.8% (-60.2 to -38.1%) |
|                                            | Ischaemic stroke                        | 21.8% (18.3–25.2%) | 236.1 (185.7–292.6) | -45.1% (-55.3 to -34.3%) | 18.5% (15.4–21.5%)  | 11 (8.3–13.9)    | -46.3% (-58.2 to -33.7%) |
|                                            | Intracerebral haemorrhage               | 25% (21.2–28.6%)   | 81.3 (63.9–102.3)   | -59.3% (-67.5 to -48.8%) | 21.6% (18.2–25%)    | 3.3 (2.5–4.2)    | -58.3% (-67.3 to -46.9%) |
|                                            | Subarachnoid haemorrhage                | 27.3% (23.3–31.3%) | 10.6 (8–13.5)       | -47.2% (-61.5 to -23.8%) | 22.9% (19.4–26.5%)  | 0.3 (0.2–0.4)    | -54.5% (-69.2 to -28.3%) |
|                                            | Stroke                                  | 3.8% (2.8–4.8%)    | 55.1 (39–72.3)      | -61.7% (-69 to -52.6%)   | 3.2% (2.3–4.1%)     | 2.4 (1.7–3.2)    | -62% (-70.2 to -52.5%)   |
|                                            | Ischaemic stroke                        | 3.5% (2.5–4.4%)    | 37.8 (26.4–50.2)    | -58.3% (-67.1 to -48.8%) | 3% (2.2–3.8%)       | 1.8 (1.2–2.4)    | -59.6% (-68.7 to -49%)   |
|                                            | Intracerebral haemorrhage               | 4.7% (3.5–6%)      | 15.4 (10.7–20.5)    | -68.1% (-75.3 to -58.9%) | 3.9% (2.9–5%)       | 0.6 (0.4–0.8)    | -67.7% (-75.2 to -58.3%) |
|                                            | Subarachnoid haemorrhage                | 5.1% (3.8–6.5%)    | 2 (1.4–2.6)         | -59.1% (-70.2 to -39.5%) | 4.3% (3.2–5.5%)     | 0.1 (0–0.1)      | -64% (-75.1 to -44.5%)   |
| Short gestation                            | Meningitis                              | 4.2% (2.5–6.8%)    | 2.2 (1.2–4)         | -57.5% (-81.1 to -3.4%)  | 2.6% (1.5–4.3%)     | <0.1 (<0.1–<0.1) | -57.5% (-81.1 to -3.4%)  |
|                                            | Encephalitis                            | 1.1% (0.6–1.8%)    | 0.1 (0.1–0.2)       | -70.9% (-89.7 to 4%)     | 0.8% (0.5–1.5%)     | <0.1 (<0.1–<0.1) | -70.9% (-89.7 to 4%)     |
| Smoking                                    | Stroke                                  | 17.6% (15.8–19.5%) | 255.7 (203.2–307.2) | -58.6% (-67.7 to -47.7%) | 13.1% (11.5–14.8%)  | 9.9 (7.5–12.2)   | -59.5% (-69.5 to -47.7%) |
|                                            | Ischaemic stroke                        | 16.4% (14.6–18.1%) | 177.4 (140.6–214.7) | -55.3% (-65.2 to -44.5%) | 12.1% (10.4–13.6%)  | 7.2 (5.3–8.8)    | -56.7% (-67.4 to -43.8%) |
|                                            | Intracerebral haemorrhage               | 21.3% (18.9–23.7%) | 69.5 (54.9–86.3)    | -65.4% (-74.2 to -54.8%) | 16.8% (14.7–19%)    | 2.6 (2–3.2)      | -65.6% (-74.4 to -54.8%) |
|                                            | Subarachnoid haemorrhage                | 22.6% (19.4–25.3%) | 8.8 (6.3–11.2)      | -55.4% (-70.9 to -33.6%) | 18.4% (15.3–21%)    | 0.2 (0.1–0.3)    | -62% (-77.4 to -38.7%)   |
|                                            | Neurological disorders*                 | 5.9% (2.1–12.6%)   | 75.3 (25.7–180.6)   | -16.4% (-32.9 to 5%)     | 13.3% (4–21.7%)     | 4.5 (0.5–13.2)   | -19.8% (-39.2 to 15.2%)  |
|                                            | Alzheimer's disease and other dementias | 22.2% (14.7–29.6%) | 81.9 (33.1–185.3)   | -19.7% (-35.1 to -3.1%)  | 20.8% (13.5–28.5%)  | 5 (1.2–13.7)     | -22.4% (-39.6 to -2.3%)  |
| Tobacco                                    | Parkinson's disease                     | -13% (-19.7–6.5%)  | -9.7 (-15.4–4.7)    | -37.1% (-54.1 to -17.7%) | -11.5% (-17.9–5.7%) | -0.6 (-0.9–0.3)  | -37.7% (-55.5 to -16.2%) |
|                                            | Multiple sclerosis                      | 15.8% (12.1–19.5%) | 3 (2–4.1)           | -9.9% (-29.5 to 16.2%)   | 17.2% (12.6–21.8%)  | <0.1 (<0.1–<0.1) | -16.9% (-45.6 to 18.9%)  |
|                                            | Stroke                                  | 20.7% (18.7–22.6%) | 299.9 (240–359.4)   | -58.8% (-67.6 to -49%)   | 15.8% (14–17.5%)    | 12 (9.2–14.6)    | -59.7% (-69.4 to -48.8%) |
|                                            | Ischaemic stroke                        | 19.2% (17.3–21%)   | 208.2 (166.9–248.7) | -55.5% (-65.1 to -45.2%) | 14.6% (12.9–16.3%)  | 8.7 (6.5–10.5)   | -56.9% (-67.4 to -45.3%) |
|                                            | Intracerebral haemorrhage               | 25% (22.6–27.4%)   | 81.4 (64.8–99.7)    | -65.7% (-73.5 to -56%)   | 19.9% (17.8–22.1%)  | 3 (2.4–3.8)      | -65.8% (-74 to -55.5%)   |
|                                            | Subarachnoid haemorrhage                | 26.5% (23.6–29.3%) | 10.3 (7.5–12.9)     | -55.7% (-70.3 to -35%)   | 21.8% (19–24.5%)    | 0.3 (0.2–0.4)    | -62.1% (-76.2 to -40.3%) |
|                                            | Neurological disorders*                 | 5.9% (2.1–12.6%)   | 75.3 (25.7–180.6)   | -16.4% (-32.9 to 5%)     | 13.3% (4–21.7%)     | 4.5 (0.5–13.2)   | -19.8% (-39.2 to 15.2%)  |
|                                            | Alzheimer's disease and other dementias | 22.2% (14.7–29.6%) | 81.9 (33.1–185.3)   | -19.7% (-35.1 to -3.1%)  | 20.8% (13.5–28.5%)  | 5 (1.2–13.7)     | -22.4% (-39.6 to -2.3%)  |
|                                            | Parkinson's disease                     | -13% (-19.7–6.5%)  | -9.7 (-15.4–4.7)    | -37.1% (-54.1 to -17.7%) | -11.5% (-17.9–5.7%) | -0.6 (-0.9–0.3)  | -37.7% (-55.5 to -16.2%) |
|                                            | Multiple sclerosis                      | 15.8% (12.1–19.5%) | 3 (2–4.1)           | -9.9% (-29.5 to 16.2%)   | 17.2% (12.6–21.8%)  | <0.1 (<0.1–<0.1) | -16.9% (-45.6 to 18.9%)  |
| <b>Kuwait</b>                              |                                         |                    |                     |                          |                     |                  |                          |
| Air pollution                              | Meningitis                              | 1.4% (0.8–2.3%)    | 0.3 (0.1–0.5)       | -62.2% (-81.8 to -26.4%) | 0.8% (0.4–1.3%)     | <0.1 (<0.1–<0.1) | -62.2% (-81.8 to -26.4%) |
|                                            | Encephalitis                            | 0.5% (0.3–0.8%)    | 0.1 (0–0.1)         | -11.4% (-61.6 to 92%)    | 0.4% (0.2–0.6%)     | <0.1 (<0.1–<0.1) | -11.4% (-61.7 to 92%)    |
|                                            | Stroke                                  | 34.3% (30.5–37.8%) | 321.6 (267.5–391.1) | -11.1% (-23.6 to 4.3%)   | 29.5% (26–32.9%)    | 13.7 (10.9–16.9) | -9.2% (-24.3 to 9.2%)    |
|                                            | Ischaemic stroke                        | 33.1% (29.3–36.5%) | 213.3 (175.1–262.4) | -12.7% (-24.7 to 1.9%)   | 28.4% (24.9–31.9%)  | 9.7 (7.6–12.1)   | -10.7% (-25.7 to 8.2%)   |

**Table S16** Regional and national disabilities and deaths related to neurological conditions attributable to risk factors in North Africa and Middle East countries

| Location<br>Risk factor (alphabetic order) | Cause                                   | DALYs (95% UI)       |                     |                          | Deaths (95% UI)          |                  |                          |
|--------------------------------------------|-----------------------------------------|----------------------|---------------------|--------------------------|--------------------------|------------------|--------------------------|
|                                            |                                         | PAF (%)              | Rate per 100,000    | Rate change (%)          | PAF (%)                  | Rate per 100,000 | Rate change (%)          |
|                                            |                                         | 2019                 | 2019                | From 1990 to 2019        | 2019                     | 2019             | From 1990 to 2019        |
| Alcohol use                                | Intracerebral haemorrhage               | 36.9% (32.9–40.5%)   | 90.8 (73–113.2)     | -2.2% (-21.6 to 21%)     | 32.4% (28.8–36%)         | 3.5 (2.7–4.4)    | -1.3% (-23.9 to 25.3%)   |
|                                            | Subarachnoid haemorrhage                | 37.2% (33.5–40.9%)   | 17.5 (14.2–21.6)    | -28.9% (-42.9 to -4.1%)  | 33.3% (29.5–36.9%)       | 0.5 (0.4–0.7)    | -25.3% (-43.4 to 4.5%)   |
|                                            | Stroke                                  | 0% (-0.1–0.1%)       | 0 (-0.9–1.4)        |                          | 0% (-0.1–0.1%)           | <0.1 (<0.1–<0.1) |                          |
|                                            | Ischaemic stroke                        | -0.1% (-0.2–0%)      | -0.4 (-1.1–0.3)     |                          | -0.1% (-0.1–0%)          | <0.1 (<0.1–<0.1) |                          |
|                                            | Intracerebral haemorrhage               | 0.2% (0–0.6%)        | 0.4 (-0.1–1.4)      |                          | 0.1% (0–0.4%)            | <0.1 (<0.1–<0.1) |                          |
| All risk factors                           | Neurological disorders*                 | 0% (0–0.1%)          | 0.3 (0–1)           |                          | 0% (0–0%)                | <0.1 (<0.1–<0.1) |                          |
|                                            | Idiopathic epilepsy                     | 0.3% (0–0.6%)        | 0.3 (0–1)           |                          | 0.3% (0–0.7%)            | <0.1 (<0.1–<0.1) |                          |
|                                            | Meningitis                              | 6.2% (3.9–8.6%)      | 1.2 (0.7–1.9)       | -62.2% (-78.1 to -40.6%) | 3.5% (2.2–5.1%)          | <0.1 (<0.1–<0.1) | -62.2% (-78.1 to -40.6%) |
|                                            | Encephalitis                            | 2.3% (1.6–3.1%)      | 0.2 (0.2–0.3)       | -12.2% (-45.8 to 46.1%)  | 1.6% (1.1–2.1%)          | <0.1 (<0.1–<0.1) | -12.2% (-45.8 to 46.1%)  |
|                                            | Stroke                                  | 88.6% (85.4–91.7%)   | 831 (700–979)       | -10.5% (-23.2 to 4.5%)   | 87.1% (82.2–92.2%)       | 40.5 (32.7–48.4) | -8.9% (-24 to 9.3%)      |
|                                            | Ischaemic stroke                        | 88.9% (84.7–93.3%)   | 574 (476.1–674.1)   | -11.8% (-24.1 to 2.7%)   | 87.1% (80.9–93.8%)       | 29.8 (23.9–36)   | -10.2% (-25.8 to 7.4%)   |
|                                            | Intracerebral haemorrhage               | 88.3% (84.9–91%)     | 217.2 (176.9–260.5) | -2.2% (-22.3 to 21.2%)   | 87.4% (82.1–91.9%)       | 9.4 (7.4–11.5)   | -2.2% (-25.2 to 24.3%)   |
|                                            | Subarachnoid haemorrhage                | 84.8% (81.4–87.8%)   | 39.9 (32.6–48.1)    | -28.6% (-43.1 to -4%)    | 85.6% (80.4–89.9%)       | 1.3 (1.1–1.7)    | -22.5% (-41.4 to 6.6%)   |
|                                            | Neurological disorders*                 | 14.9% (6.1–29.3%)    | 189.1 (72.1–447.7)  | 14% (0.5 to 33.2%)       | 36.9% (19.5–53.9%)       | 11.8 (2.5–33.6)  | 16.5% (0.8 to 43.3%)     |
|                                            | Alzheimer's disease and other dementias | 49.7% (33.6–65.4%)   | 192.7 (76.1–449.1)  | 11.4% (-1.6 to 27.8%)    | 48.1% (32.4–64.3%)       | 12.1 (2.8–33.9)  | 14.7% (-1.6 to 37.1%)    |
| Ambient particulate matter pollution       | Parkinson's disease                     | -10.5% (-15.4–-5.8%) | -5.9 (-9.1–-3.1)    | -34.7% (-51.7 to -13.6%) | -9.9% (-14.5–-5.3%)      | -0.3 (-0.5–0.2)  | -26.4% (-47 to -0.6%)    |
|                                            | Idiopathic epilepsy                     | 0.3% (0–0.6%)        | 0.3 (0–1)           |                          | 0.3% (0–0.7%)            | <0.1 (<0.1–<0.1) |                          |
|                                            | Multiple sclerosis                      | 11.2% (7.8–14.7%)    | 1.9 (1.2–2.8)       | 3% (-15.4 to 26%)        | 12.8% (8.3–17.9%)        | <0.1 (<0.1–<0.1) | -21.7% (-43.4 to 5.5%)   |
|                                            | Meningitis                              | 1.4% (0.8–2.3%)      | 0.3 (0.1–0.5)       | -61.4% (-81.6 to -24.7%) | 0.8% (0.4–1.3%)          | <0.1 (<0.1–<0.1) | -61.5% (-81.6 to -24.7%) |
|                                            | Encephalitis                            | 0.5% (0.3–0.8%)      | 0.1 (0–0.1)         | -9.7% (-61 to 94.7%)     | 0.4% (0.2–0.6%)          | <0.1 (<0.1–<0.1) | -9.7% (-61 to 94.8%)     |
|                                            | Stroke                                  | 34.3% (30.4–37.8%)   | 321.5 (267.4–391)   | -9.7% (-22.2 to 6.4%)    | 29.5% (25.9–32.9%)       | 13.7 (10.9–16.9) | -7.7% (-22.6 to 11.2%)   |
|                                            | Ischaemic stroke                        | 33% (29.2–36.5%)     | 213.2 (174.9–262.4) | -11.3% (-23.4 to 3.8%)   | 28.4% (24.9–31.9%)       | 9.7 (7.6–12.1)   | -9.2% (-24.4 to 9.9%)    |
|                                            | Intracerebral haemorrhage               | 36.9% (32.9–40.5%)   | 90.8 (73–113.1)     | -0.8% (-20.7 to 23%)     | 32.4% (28.7–35.9%)       | 3.5 (2.7–4.4)    | 0.2% (-22.7 to 27.3%)    |
|                                            | Subarachnoid haemorrhage                | 37.2% (33.5–40.9%)   | 17.5 (14.2–21.6)    | -27.8% (-42.3 to -2.6%)  | 33.3% (29.5–36.9%)       | 0.5 (0.4–0.7)    | -24.1% (-42.6 to 6.4%)   |
|                                            | Behavioural risk factors‡               | Meningitis           | 5.9% (3.8–8.3%)     | 1.2 (0.6–1.8)            | -61.8% (-77.6 to -40.2%) | 3.3% (2.1–4.9%)  | <0.1 (<0.1–<0.1)         |
| Encephalitis                               |                                         | 2.2% (1.5–3%)        | 0.2 (0.1–0.3)       | -11.2% (-44.5 to 47.3%)  | 1.5% (1.1–2%)            | <0.1 (<0.1–<0.1) | -11.2% (-44.5 to 47.3%)  |
| Stroke                                     |                                         | 39.3% (33.3–45.8%)   | 368.8 (288.7–456)   | -14.9% (-27.8 to 0.6%)   | 34.9% (28.3–41.8%)       | 16.2 (12.2–20.6) | -12.2% (-27.3 to 6.2%)   |
| Ischaemic stroke                           |                                         | 39.7% (32.2–47.8%)   | 256 (194.4–321)     | -16% (-28.1 to -0.9%)    | 35.6% (27.5–43.9%)       | 12.2 (8.9–15.8)  | -12.9% (-28.2 to 5.9%)   |
| Intracerebral haemorrhage                  |                                         | 38.8% (32.4–45.9%)   | 95.6 (72.3–121.8)   | -6.8% (-26.5 to 17.3%)   | 33.1% (26.9–40.7%)       | 3.6 (2.6–4.7)    | -5.6% (-28 to 21.6%)     |
| Subarachnoid haemorrhage                   |                                         | 36.7% (30.2–43.5%)   | 17.2 (13.1–22.1)    | -34.7% (-48.6 to -11.7%) | 32.2% (26–39.8%)         | 0.5 (0.4–0.7)    | -31.2% (-48.7 to -2.1%)  |
| Neurological disorders*                    |                                         | 5.3% (2–11%)         | 67.9 (24.4–158.1)   | -4.4% (-20.9 to 17.5%)   | 12.2% (5–19.4%)          | 4 (0.7–11.3)     | 1% (-20.2 to 34.9%)      |

**Table S16** Regional and national disabilities and deaths related to neurological conditions attributable to risk factors in North Africa and Middle East countries

| Location<br>Risk factor (alphabetic order) | Cause                                   | DALYs (95% UI)       |                   |                          | Deaths (95% UI)     |                  |                          |
|--------------------------------------------|-----------------------------------------|----------------------|-------------------|--------------------------|---------------------|------------------|--------------------------|
|                                            |                                         | PAF (%)              | Rate per 100,000  | Rate change (%)          | PAF (%)             | Rate per 100,000 | Rate change (%)          |
|                                            |                                         | 2019                 | 2019              | From 1990 to 2019        | 2019                | 2019             | From 1990 to 2019        |
|                                            | Alzheimer's disease and other dementias | 18.4% (11.8–25.6%)   | 71.5 (28.7–161.3) | -8.6% (-24.7 to 10.3%)   | 17% (11–24%)        | 4.3 (1–11.6)     | -1.9% (-22.4 to 22.7%)   |
|                                            | Parkinson's disease                     | -10.5% (-15.4–-5.8%) | -5.9 (-9.1–-3.1)  | -34.7% (-51.7 to -13.6%) | -9.9% (-14.5–-5.3%) | -0.3 (-0.5–0.2)  | -26.4% (-47 to -0.6%)    |
|                                            | Idiopathic epilepsy                     | 0.3% (0–0.6%)        | 0.3 (0–1)         |                          | 0.3% (0–0.7%)       | <0.1 (<0.1–<0.1) |                          |
|                                            | Multiple sclerosis                      | 11.2% (7.8–14.7%)    | 1.9 (1.2–2.8)     | 3% (-15.4 to 26%)        | 12.8% (8.3–17.9%)   | <0.1 (<0.1–<0.1) | -21.7% (-43.4 to 5.5%)   |
| Child and maternal malnutrition            | Meningitis                              | 5.9% (3.8–8.3%)      | 1.2 (0.6–1.8)     | -61.8% (-77.6 to -40.2%) | 3.3% (2.1–4.9%)     | <0.1 (<0.1–<0.1) | -61.8% (-77.6 to -40.1%) |
|                                            | Encephalitis                            | 2.2% (1.5–3%)        | 0.2 (0.1–0.3)     | -11.2% (-44.5 to 47.3%)  | 1.5% (1.1–2%)       | <0.1 (<0.1–<0.1) | -11.2% (-44.5 to 47.3%)  |
| Diet high in red meat                      | Stroke                                  | 7.8% (4.4–10.3%)     | 73.1 (40.2–101.2) | -16% (-29.2 to -0.4%)    | 5.8% (3.1–7.9%)     | 2.7 (1.4–3.9)    | -12.2% (-29.4 to 9.5%)   |
|                                            | Ischaemic stroke                        | 7% (2.6–9.6%)        | 44.9 (17.2–65.3)  | -17.7% (-31.1 to -2.2%)  | 5.1% (1.8–7.2%)     | 1.7 (0.6–2.7)    | -13.7% (-32.7 to 8.2%)   |
|                                            | Intracerebral haemorrhage               | 9.5% (3.8–13.5%)     | 23.5 (9.4–36)     | -7.2% (-27.1 to 15.1%)   | 7.8% (2.9–11.2%)    | 0.8 (0.3–1.3)    | -4.7% (-27.8 to 23.6%)   |
|                                            | Subarachnoid haemorrhage                | 10% (4–14.1%)        | 4.7 (1.8–7)       | -34.6% (-49.6 to -11.1%) | 8% (3–11.5%)        | 0.1 (0–0.2)      | -31.8% (-50 to -2.4%)    |
| Diet high in sodium                        | Stroke                                  | 3.9% (0.2–12.8%)     | 36.1 (2–120.8)    | -3.9% (-41.8 to 45.7%)   | 3.3% (0.2–11.5%)    | 1.5 (0.1–5.4)    | 1.9% (-42.4 to 60.2%)    |
|                                            | Ischaemic stroke                        | 3.5% (0.2–12.2%)     | 22.6 (1.4–78.8)   | -5.2% (-39.7 to 49.4%)   | 3% (0.2–10.6%)      | 1 (0.1–3.8)      | 1.2% (-44.2 to 66.2%)    |
|                                            | Intracerebral haemorrhage               | 4.7% (0.2–15.4%)     | 11.5 (0.5–37)     | 4.6% (-42 to 62.8%)      | 4.1% (0.2–13.9%)    | 0.4 (0–1.5)      | 8.2% (-40.7 to 69.6%)    |
|                                            | Subarachnoid haemorrhage                | 4.1% (0.2–13.9%)     | 1.9 (0.1–6.6)     | -27.9% (-59.8 to 12.2%)  | 3.9% (0.2–13.2%)    | 0.1 (0–0.2)      | -21.6% (-56.3 to 23.4%)  |
| Diet low in fibre                          | Stroke                                  | 2.7% (0.6–5.2%)      | 25 (5.3–49.1)     | -38.4% (-51.7 to -24.1%) | 2.2% (0.5–4.3%)     | 1 (0.2–2.1)      | -39.1% (-54.8 to -21%)   |
|                                            | Ischaemic stroke                        | 2.5% (0.5–4.9%)      | 16.1 (3.5–31.9)   | -39.6% (-52.1 to -25.9%) | 2.1% (0.5–4%)       | 0.7 (0.2–1.4)    | -40.3% (-56.2 to -21.6%) |
|                                            | Intracerebral haemorrhage               | 3% (0.6–5.9%)        | 7.4 (1.5–14.8)    | -32% (-50 to -13.4%)     | 2.6% (0.6–5.1%)     | 0.3 (0.1–0.6)    | -33.6% (-53.5 to -11.2%) |
|                                            | Subarachnoid haemorrhage                | 3.1% (0.6–6.2%)      | 1.5 (0.3–3)       | -51.3% (-64.6 to -29.9%) | 2.6% (0.6–5.2%)     | <0.1 (<0.1–0.1)  | -49.4% (-65.3 to -26.5%) |
| Diet low in fruits                         | Stroke                                  | 4.8% (2.1–7.9%)      | 45.3 (19–76.4)    | -4% (-20.2 to 17.1%)     | 3.7% (1.6–6.2%)     | 1.7 (0.7–3)      | -4.7% (-23.9 to 21.2%)   |
|                                            | Ischaemic stroke                        | 3.8% (0.8–7.5%)      | 24.8 (4.8–49)     | -5.6% (-22.1 to 24.2%)   | 2.9% (0.6–5.7%)     | 1 (0.2–2)        | -7.2% (-26.8 to 25.2%)   |
|                                            | Intracerebral haemorrhage               | 7% (3.1–13.1%)       | 17.1 (7.5–33)     | 4.6% (-17.7 to 35.3%)    | 5.8% (2.6–11%)      | 0.6 (0.3–1.2)    | 3.3% (-21.6 to 36.3%)    |
|                                            | Subarachnoid haemorrhage                | 7.3% (3.3–13.6%)     | 3.4 (1.5–6.5)     | -25.5% (-41.2 to 6.3%)   | 6% (2.7–11.3%)      | 0.1 (0–0.2)      | -22.5% (-42.1 to 10.2%)  |
| Diet low in vegetables                     | Stroke                                  | 0.4% (0.2–0.9%)      | 4 (1.9–8.5)       | -51.5% (-67.1 to -16%)   | 0.5% (0.2–0.9%)     | 0.2 (0.1–0.4)    | -51.3% (-69.3 to -16.4%) |
|                                            | Ischaemic stroke                        | 0.4% (0.2–0.9%)      | 2.8 (1.2–5.9)     | -51.2% (-66.7 to -10.2%) | 0.5% (0.2–0.9%)     | 0.2 (0.1–0.3)    | -50.9% (-69.7 to -7.3%)  |
|                                            | Intracerebral haemorrhage               | 0.4% (0.2–1.3%)      | 1.1 (0.4–3.4)     | -49.5% (-68.5 to 7%)     | 0.5% (0.2–1.5%)     | 0.1 (0–0.2)      | -51.5% (-71.4 to 4.5%)   |
|                                            | Subarachnoid haemorrhage                | 0.4% (0.2–1.2%)      | 0.2 (0.1–0.6)     | -62.9% (-77.8 to -14.1%) | 0.5% (0.2–1.4%)     | <0.1 (<0.1–<0.1) | -58.7% (-75.2 to -7.9%)  |
| Diet low in whole grains                   | Stroke                                  | 3.6% (0.9–5.4%)      | 34.2 (8.4–52.4)   | -15.5% (-26.9 to -2.2%)  | 3.2% (0.8–4.6%)     | 1.5 (0.4–2.3)    | -14.2% (-28.9 to 2.9%)   |
|                                            | Ischaemic stroke                        | 5.3% (1.3–7.8%)      | 34.2 (8.4–52.4)   | -15.5% (-26.9 to -2.2%)  | 4.3% (1.1–6.3%)     | 1.5 (0.4–2.3)    | -14.2% (-28.9 to 2.9%)   |
| Dietary risks                              | Stroke                                  | 20.8% (14.7–28.5%)   | 195 (133.6–276.9) | -15.8% (-29.1 to -0.1%)  | 17.2% (11.5–24.4%)  | 8 (5.1–11.6)     | -14.5% (-30.1 to 5%)     |
|                                            | Ischaemic stroke                        | 20.2% (12.9–28%)     | 130 (81.4–186.5)  | -17.3% (-29.8 to -1%)    | 16.5% (10.1–23.9%)  | 5.6 (3.4–8.4)    | -16% (-31.8 to 4.7%)     |
|                                            | Intracerebral haemorrhage               | 22.2% (13.9–31.1%)   | 54.6 (32.6–79.4)  | -6.9% (-27.5 to 17.7%)   | 19.1% (11.6–28.6%)  | 2.1 (1.2–3.1)    | -7% (-29.9 to 20.5%)     |
|                                            | Subarachnoid haemorrhage                | 22.3% (14.2–31.1%)   | 10.5 (6.5–15.2)   | -33.8% (-47.8 to -10.8%) | 19.2% (11.7–28.3%)  | 0.3 (0.2–0.5)    | -30.5% (-48.4 to -2.5%)  |

**Table S16** Regional and national disabilities and deaths related to neurological conditions attributable to risk factors in North Africa and Middle East countries

| Location<br>Risk factor (alphabetic order) | Cause                                   | DALYs (95% UI)     |                     |                          | Deaths (95% UI)    |                  |                          |
|--------------------------------------------|-----------------------------------------|--------------------|---------------------|--------------------------|--------------------|------------------|--------------------------|
|                                            |                                         | PAF (%)            | Rate per 100,000    | Rate change (%)          | PAF (%)            | Rate per 100,000 | Rate change (%)          |
|                                            |                                         | 2019               | 2019                | From 1990 to 2019        | 2019               | 2019             | From 1990 to 2019        |
| Environmental/occupational risk factors§   | Meningitis                              | 1.4% (0.8–2.3%)    | 0.3 (0.1–0.5)       | -62.2% (-81.8 to -26.4%) | 0.8% (0.4–1.3%)    | <0.1 (<0.1–<0.1) | -62.2% (-81.8 to -26.4%) |
|                                            | Encephalitis                            | 0.5% (0.3–0.8%)    | 0.1 (0–0.1)         | -11.4% (-61.6 to 92%)    | 0.4% (0.2–0.6%)    | <0.1 (<0.1–<0.1) | -11.4% (-61.7 to 92%)    |
|                                            | Stroke                                  | 40.7% (35.9–45.4%) | 382.1 (311.4–464)   | -11.2% (-23.9 to 5.1%)   | 37.8% (32.1–43.2%) | 17.6 (13.3–22.1) | -8% (-23.6 to 12.3%)     |
|                                            | Ischaemic stroke                        | 39.4% (34.7–44%)   | 254.5 (206.7–311.3) | -12.3% (-24.8 to 4.1%)   | 36.8% (30.9–42.3%) | 12.6 (9.3–15.9)  | -9.2% (-24.7 to 11.7%)   |
|                                            | Intracerebral haemorrhage               | 43.6% (38.4–48.6%) | 107.4 (83.5–134.6)  | -2.9% (-22.9 to 21.2%)   | 40.5% (34.9–46%)   | 4.4 (3.3–5.5)    | -1.1% (-24 to 26%)       |
|                                            | Subarachnoid haemorrhage                | 43.1% (38.4–47.7%) | 20.2 (16.2–25)      | -30.9% (-44.6 to -5.3%)  | 41.2% (35.5–46.5%) | 0.6 (0.5–0.8)    | -24.6% (-43.1 to 5.6%)   |
| High body-mass index                       | Stroke                                  | 39.3% (28.7–48.3%) | 368.9 (255.9–482.7) | 2.1% (-14.4 to 21.5%)    | 25.5% (16.7–34.2%) | 11.9 (7.3–16.8)  | 8.1% (-13.7 to 35.6%)    |
|                                            | Ischaemic stroke                        | 33% (22.8–42.2%)   | 212.7 (143.2–291.1) | 2.8% (-12.9 to 23%)      | 21.2% (13–30.2%)   | 7.2 (4.2–10.8)   | 7.8% (-13.2 to 36.9%)    |
|                                            | Intracerebral haemorrhage               | 52.6% (40.3–63.1%) | 129.5 (93.4–167.6)  | 9.2% (-13.4 to 36%)      | 36.9% (25.5–48.8%) | 4 (2.6–5.6)      | 16.1% (-10.9 to 50.7%)   |
|                                            | Subarachnoid haemorrhage                | 57% (45–66.3%)     | 26.8 (19.8–34.2)    | -25.8% (-41.1 to 4.8%)   | 41.6% (29.8–53%)   | 0.7 (0.4–0.9)    | -22.4% (-42.3 to 12.6%)  |
|                                            | Neurological disorders*                 | 7.6% (2.4–16.4%)   | 95.9 (27.3–233.5)   | 29% (6.1 to 67.6%)       | 18.8% (7.4–32.8%)  | 5.9 (1.1–17)     | 29.1% (0.6 to 79.7%)     |
|                                            | Alzheimer's disease and other dementias | 24.7% (10.9–41.2%) | 95.9 (27.3–233.5)   | 29% (6.1 to 67.6%)       | 23.6% (10.2–39.8%) | 5.9 (1.1–17)     | 29.1% (0.6 to 79.7%)     |
| High fasting plasma glucose                | Stroke                                  | 30% (19.4–46.4%)   | 281.1 (178.1–446.7) | -6% (-26.1 to 22.2%)     | 30.2% (17.9–51.8%) | 14.1 (8.3–25.4)  | -9.6% (-29 to 17.5%)     |
|                                            | Ischaemic stroke                        | 31.1% (17.8–54.2%) | 200.8 (110.8–352.1) | -10.2% (-29 to 17.6%)    | 30.7% (15.7–60.5%) | 10.5 (5.1–21.2)  | -12.4% (-31.4 to 14.4%)  |
|                                            | Intracerebral haemorrhage               | 27.7% (18.3–39.5%) | 68.3 (42.5–102.4)   | 9.8% (-19.4 to 49%)      | 29% (18.1–45.4%)   | 3.1 (1.8–5)      | 1.7% (-26 to 42.7%)      |
|                                            | Subarachnoid haemorrhage                | 25.4% (16.9–35.4%) | 11.9 (7.4–17.2)     | -9.6% (-32.7 to 25.1%)   | 29.2% (18.4–44.1%) | 0.5 (0.3–0.7)    | -12% (-37.8 to 28.5%)    |
|                                            | Neurological disorders*                 | 5.5% (1.1–14.5%)   | 69.3 (13.2–210.6)   | 32% (17 to 58.8%)        | 14.3% (3.4–30%)    | 4.5 (0.6–15.4)   | 32.8% (13.7 to 67%)      |
|                                            | Alzheimer's disease and other dementias | 17.8% (4.7–35.7%)  | 69.3 (13.2–210.6)   | 32% (17 to 58.8%)        | 18% (4.7–35.9%)    | 4.5 (0.6–15.4)   | 32.8% (13.7 to 67%)      |
| High LDL cholesterol                       | Stroke                                  | 17.5% (10–29.5%)   | 164 (90.3–282.1)    | -11% (-24.9 to 3.1%)     | 15.7% (5.4–32.1%)  | 7.3 (2.5–15.7)   | -9.6% (-26.7 to 7.6%)    |
|                                            | Ischaemic stroke                        | 25.4% (14.4–42.8%) | 164 (90.3–282.1)    | -11% (-24.9 to 3.1%)     | 21.4% (7.4–44.2%)  | 7.3 (2.5–15.7)   | -9.6% (-26.7 to 7.6%)    |
| High systolic blood pressure               | Stroke                                  | 51% (43.1–59%)     | 478.8 (375.2–590.9) | -10.3% (-26.2 to 8.7%)   | 49.4% (39.7–60.2%) | 23 (16.8–29.9)   | -9.3% (-27.3 to 11.9%)   |
|                                            | Ischaemic stroke                        | 49.3% (38.6–59.7%) | 318.5 (236–406.5)   | -12.4% (-28 to 5.6%)     | 47.4% (35.1–60.9%) | 16.2 (11.3–22.1) | -10.9% (-28.9 to 11.3%)  |
|                                            | Intracerebral haemorrhage               | 55% (45.6–64.2%)   | 135.5 (100.6–173)   | -1.1% (-24 to 24.2%)     | 55% (42.7–67%)     | 5.9 (4.1–7.8)    | -2.2% (-26.7 to 27%)     |
|                                            | Subarachnoid haemorrhage                | 52.7% (43.7–61.7%) | 24.8 (18.6–31.4)    | -25.5% (-42.3 to 2.4%)   | 54.8% (43.6–65.9%) | 0.9 (0.6–1.1)    | -20.7% (-41.9 to 12.7%)  |
|                                            | Neurological disorders*                 | 3.9% (1.6–5%)      | 36.8 (8.6–62.9)     | -4.8% (-31.4 to 22.4%)   | 4.9% (1.2–8%)      | 2.3 (0.6–3.9)    | -1.2% (-31 to 28.1%)     |
| High temperature                           | Stroke                                  | 3.9% (1.6–5%)      | 36.8 (8.6–62.9)     | -4.8% (-31.4 to 22.4%)   | 4.9% (1.2–8%)      | 2.3 (0.6–3.9)    | -1.2% (-31 to 28.1%)     |
|                                            | Ischaemic stroke                        | 3.7% (1.6–3%)      | 24.2 (5.8–41.9)     | -5.4% (-35.4 to 24%)     | 4.9% (1.2–8%)      | 1.7 (0.4–2.9)    | -2.3% (-33.8 to 26.8%)   |
|                                            | Intracerebral haemorrhage               | 4.4% (1.1–7.2%)    | 10.8 (2.5–18.8)     | 4.9% (-29.7 to 42.8%)    | 4.9% (1.2–8%)      | 0.5 (0.1–0.9)    | 5.4% (-29.7 to 44.7%)    |
|                                            | Subarachnoid haemorrhage                | 3.8% (1.6–3%)      | 1.8 (0.5–3.2)       | -35.4% (-56.6 to 3.2%)   | 4.9% (1.2–8%)      | 0.1 (0–0.1)      | -17.7% (-44.7 to 23.4%)  |
| Household air pollution from solid fuels   | Meningitis                              | 0% (0–0%)          | <0.1 (<0.1–<0.1)    | -99% (-99.7 to -97%)     | 0% (0–0%)          | <0.1 (<0.1–<0.1) | -99% (-99.7 to -97%)     |
|                                            | Encephalitis                            | 0% (0–0%)          | <0.1 (<0.1–<0.1)    | -97.6% (-99.4 to -92.6%) | 0% (0–0%)          | <0.1 (<0.1–<0.1) | -97.6% (-99.4 to -92.6%) |
|                                            | Stroke                                  | 0% (0–0%)          | 0.1 (0–0.4)         | -97.8% (-99.2 to -94.9%) | 0% (0–0%)          | <0.1 (<0.1–<0.1) | -97.8% (-99.2 to -94.8%) |



**Table S16** Regional and national disabilities and deaths related to neurological conditions attributable to risk factors in North Africa and Middle East countries

| Location<br>Risk factor (alphabetic order) |                                         | DALYs (95% UI)     |                     |                          | Deaths (95% UI)        |                  |                          |
|--------------------------------------------|-----------------------------------------|--------------------|---------------------|--------------------------|------------------------|------------------|--------------------------|
|                                            |                                         | PAF (%)            | Rate per 100,000    | Rate change (%)          | PAF (%)                | Rate per 100,000 | Rate change (%)          |
| Cause                                      |                                         | 2019               | 2019                | From 1990 to 2019        | 2019                   | 2019             | From 1990 to 2019        |
| Kidney dysfunction                         | Ischaemic stroke                        | 0% (0–0%)          | 0·1 (0–0·2)         | -97·9% (-99·2 to -95%)   | 0% (0–0%)              | <0·1 (<0·1–<0·1) | -97·9% (-99·2 to -95%)   |
|                                            | Intracerebral haemorrhage               | 0% (0–0%)          | <0·1 (<0·1–0·1)     | -97·6% (-99·1 to -94·1%) | 0% (0–0%)              | <0·1 (<0·1–<0·1) | -97·6% (-99·1 to -94·2%) |
|                                            | Subarachnoid haemorrhage                | 0% (0–0%)          | <0·1 (<0·1–<0·1)    | -98·1% (-99·3 to -95·4%) | 0% (0–0%)              | <0·1 (<0·1–<0·1) | -98·1% (-99·3 to -95·4%) |
|                                            | Stroke                                  | 11·1% (8·4–13·6%)  | 104·4 (74·3–135)    | 10·3% (-7·1 to 31·3%)    | 10·4% (6·6–14%)        | 4·9 (2·9–6·8)    | 13·9% (-8·4 to 40·4%)    |
|                                            | Ischaemic stroke                        | 12·4% (8·7–15·7%)  | 80 (54·7–106·6)     | 8·1% (-9·4 to 29%)       | 10·6% (5·6–15·4%)      | 3·6 (1·9–5·4)    | 11·1% (-13·1 to 38·6%)   |
| Lead exposure                              | Intracerebral haemorrhage               | 9·9% (8–11·9%)     | 24·4 (17·9–32·3)    | 18·5% (-6·9 to 49·2%)    | 11·5% (8·1–14·6%)      | 1·2 (0·8–1·7)    | 23% (-6·8 to 58·5%)      |
|                                            | Stroke                                  | 2·7% (1·1–4·6%)    | 25·8 (10·3–44·2)    | -27·7% (-43·4 to -12·5%) | 3% (1·4–4·8%)          | 1·4 (0·6–2·4)    | -10·9% (-27·3 to 8·9%)   |
|                                            | Ischaemic stroke                        | 2·8% (1·1–4·7%)    | 17·8 (7·4–30·3)     | -24·1% (-39·7 to -8%)    | 2·9% (1·3–4·8%)        | 1 (0·4–1·7)      | -8·4% (-25·3 to 13·4%)   |
| Low birth weight                           | Intracerebral haemorrhage               | 2·8% (0·9–5·1%)    | 6·9 (2·3–12·7)      | -30·2% (-52·3 to -8·2%)  | 3·3% (1·3–5·7%)        | 0·4 (0·1–0·6)    | -13·1% (-35·5 to 11·2%)  |
|                                            | Subarachnoid haemorrhage                | 2·3% (0·7–4·4%)    | 1·1 (0·3–2·1)       | -53·6% (-70·9 to -36·8%) | 3% (1·1–5·3%)          | <0·1 (<0·1–0·1)  | -35·7% (-56·2 to -8·5%)  |
|                                            | Meningitis                              | 5·4% (3·5–7·6%)    | 1·1 (0·6–1·6)       | -61·8% (-77·9 to -40%)   | 3·1% (1·9–4·5%)        | <0·1 (<0·1–<0·1) | -61·8% (-77·9 to -40%)   |
| Low birth weight and short gestation       | Encephalitis                            | 2% (1·4–2·7%)      | 0·2 (0·1–0·3)       | -11·9% (-45·1 to 46·8%)  | 1·4% (1·1–1·9%)        | <0·1 (<0·1–<0·1) | -11·9% (-45·1 to 46·8%)  |
|                                            | Meningitis                              | 5·9% (3·8–8·3%)    | 1·2 (0·6–1·8)       | -61·8% (-77·6 to -40·2%) | 3·3% (2·1–4·9%)        | <0·1 (<0·1–<0·1) | -61·8% (-77·6 to -40·1%) |
| Low physical activity                      | Encephalitis                            | 2·2% (1·5–3%)      | 0·2 (0·1–0·3)       | -11·2% (-44·5 to 47·3%)  | 1·5% (1·1–2%)          | <0·1 (<0·1–<0·1) | -11·2% (-44·5 to 47·3%)  |
|                                            | Stroke                                  | 6·8% (1·5–13·9%)   | 64 (14·5–129·7)     | -8·2% (-22·2 to 9·2%)    | 8·4% (2·1–15·7%)       | 3·9 (1–7·5)      | -9·3% (-25·2 to 10·1%)   |
| Low temperature                            | Ischaemic stroke                        | 9·9% (2·2–20·1%)   | 64 (14·5–129·7)     | -8·2% (-22·2 to 9·2%)    | 11·4% (2·8–21·4%)      | 3·9 (1–7·5)      | -9·3% (-25·2 to 10·1%)   |
|                                            | Stroke                                  | 3·4% (-2·9–9%)     | 32·1 (-26–87·7)     | -5·5% (-49 to 52·8%)     | 4·3% (-3·6–11·1%)      | 2 (-1·6–5·4)     | -2% (-47 to 62·2%)       |
|                                            | Ischaemic stroke                        | 3·3% (-2·7–8·6%)   | 21·1 (-16·9–57·8)   | -5·9% (-51·6 to 50·9%)   | 4·3% (-3·6–11·1%)      | 1·5 (-1·2–4)     | -2·9% (-49·3 to 60·5%)   |
|                                            | Intracerebral haemorrhage               | 3·8% (-3·2–10%)    | 9·4 (-8–25·9)       | 4% (-46·8 to 65·5%)      | 4·3% (-3·6–11·1%)      | 0·5 (-0·4–1·2)   | 4·2% (-49·4 to 67·6%)    |
|                                            | Subarachnoid haemorrhage                | 3·3% (-2·7–8·7%)   | 1·6 (-1·3–4·3)      | -36·2% (-64·1 to 16·7%)  | 4·3% (-3·6–11·1%)      | 0·1 (-0·1–0·2)   | -18·8% (-54·6 to 36·5%)  |
| Metabolic risk factors†                    | Stroke                                  | 75·8% (68·9–82·5%) | 711·1 (587·5–850·4) | -8·9% (-22·2 to 7%)      | 72·7% (63–82·5%)       | 33·8 (26·2–42)   | -7·9% (-23·3 to 11·9%)   |
|                                            | Ischaemic stroke                        | 76·1% (67·2–85·4%) | 491·4 (396·8–587·5) | -10·7% (-23·9 to 4·4%)   | 72·4% (59·9–86%)       | 24·7 (18·8–31·9) | -9·5% (-25·4 to 9·1%)    |
|                                            | Intracerebral haemorrhage               | 75·6% (68·1–81·7%) | 186·1 (147·2–226·6) | 0·6% (-20·7 to 25·1%)    | 73·9% (64·3–82·2%)     | 8 (6·1–10)       | -0·1% (-24·2 to 27·8%)   |
|                                            | Subarachnoid haemorrhage                | 71·5% (63·8–77·7%) | 33·6 (26·8–40·9)    | -25·9% (-41·4 to 0·3%)   | 71·1% (61·5–79·2%)     | 1·1 (0·8–1·4)    | -20·9% (-41·1 to 9·2%)   |
|                                            | Neurological disorders*                 | 11·7% (4·1–24·2%)  | 148 (49–360·4)      | 26·5% (10·7 to 56·2%)    | 29·7% (13·2–47·7%)     | 9·4 (1·7–27·1)   | 27% (7 to 61·6%)         |
|                                            | Alzheimer's disease and other dementias | 38·2% (19·5–57·6%) | 148 (49–360·4)      | 26·5% (10·7 to 56·2%)    | 37·3% (19·1–56·7%)     | 9·4 (1·7–27·1)   | 27% (7 to 61·6%)         |
|                                            | Non-optimal temperature                 | Stroke             | 7·2% (1·2–12·6%)    | 67·5 (11–121·2)          | -5·3% (-40·9 to 21·7%) | 9% (1·5–15·7%)   | 4·2 (0·7–7·6)            |
| Other environmental risks                  | Ischaemic stroke                        | 6·9% (1·1–12%)     | 44·4 (7·1–80·1)     | -5·8% (-42·8 to 20·7%)   | 9% (1·5–15·7%)         | 3·1 (0·5–5·6)    | -2·7% (-39·3 to 24·8%)   |
|                                            | Intracerebral haemorrhage               | 8% (1·4–14%)       | 19·8 (3·1–36·1)     | 4·3% (-37·1 to 37·9%)    | 9% (1·5–15·7%)         | 1 (0·1–1·8)      | 4·7% (-37·1 to 40·2%)    |
|                                            | Subarachnoid haemorrhage                | 7% (1·1–12·2%)     | 3·3 (0·5–5·9)       | -35·9% (-58·2 to -1·5%)  | 9% (1·5–15·7%)         | 0·1 (0–0·3)      | -18·4% (-47·5 to 19·4%)  |
|                                            | Stroke                                  | 2·7% (1·1–4·6%)    | 25·8 (10·3–44·2)    | -27·7% (-43·4 to -12·5%) | 3% (1·4–4·8%)          | 1·4 (0·6–2·4)    | -10·9% (-27·3 to 8·9%)   |
|                                            | Ischaemic stroke                        | 2·8% (1·1–4·7%)    | 17·8 (7·4–30·3)     | -24·1% (-39·7 to -8%)    | 2·9% (1·3–4·8%)        | 1 (0·4–1·7)      | -8·4% (-25·3 to 13·4%)   |



**Table S16** Regional and national disabilities and deaths related to neurological conditions attributable to risk factors in North Africa and Middle East countries

| Location<br>Risk factor (alphabetic order) | Cause                                   | DALYs (95% UI)       |                     |                          | Deaths (95% UI)         |                    |                          |
|--------------------------------------------|-----------------------------------------|----------------------|---------------------|--------------------------|-------------------------|--------------------|--------------------------|
|                                            |                                         | PAF (%)              | Rate per 100,000    | Rate change (%)          | PAF (%)                 | Rate per 100,000   | Rate change (%)          |
|                                            |                                         | 2019                 | 2019                | From 1990 to 2019        | 2019                    | 2019               | From 1990 to 2019        |
| Particulate matter pollution               | Intracerebral haemorrhage               | 2.8% (0.9–5.1%)      | 6.9 (2.3–12.7)      | -30.2% (-52.3 to -8.2%)  | 3.3% (1.3–5.7%)         | 0.4 (0.1–0.6)      | -13.1% (-35.5 to 11.2%)  |
|                                            | Subarachnoid haemorrhage                | 2.3% (0.7–4.4%)      | 1.1 (0.3–2.1)       | -53.6% (-70.9 to -36.8%) | 3% (1.1–5.3%)           | <0.1 (<0.1–0.1)    | -35.7% (-56.2 to -8.5%)  |
|                                            | Meningitis                              | 1.4% (0.8–2.3%)      | 0.3 (0.1–0.5)       | -62.2% (-81.8 to -26.4%) | 0.8% (0.4–1.3%)         | <0.1 (<0.1–<0.1)   | -62.2% (-81.8 to -26.4%) |
|                                            | Encephalitis                            | 0.5% (0.3–0.8%)      | 0.1 (0–0.1)         | -11.4% (-61.6 to 92%)    | 0.4% (0.2–0.6%)         | <0.1 (<0.1–<0.1)   | -11.4% (-61.7 to 92%)    |
|                                            | Stroke                                  | 34.3% (30.5–37.8%)   | 321.6 (267.5–391.1) | -11.1% (-23.6 to 4.3%)   | 29.5% (26–32.9%)        | 13.7 (10.9–16.9)   | -9.2% (-24.3 to 9.2%)    |
|                                            | Ischaemic stroke                        | 33.1% (29.3–36.5%)   | 213.3 (175.1–262.4) | -12.7% (-24.7 to 1.9%)   | 28.4% (24.9–31.9%)      | 9.7 (7.6–12.1)     | -10.7% (-25.7 to 8.2%)   |
| Secondhand smoke                           | Intracerebral haemorrhage               | 36.9% (32.9–40.5%)   | 90.8 (73–113.2)     | -2.2% (-21.6 to 21%)     | 32.4% (28.8–36%)        | 3.5 (2.7–4.4)      | -1.3% (-23.9 to 25.3%)   |
|                                            | Subarachnoid haemorrhage                | 37.2% (33.5–40.9%)   | 17.5 (14.2–21.6)    | -28.9% (-42.9 to -4.1%)  | 33.3% (29.5–36.9%)      | 0.5 (0.4–0.7)      | -25.3% (-43.4 to 4.5%)   |
|                                            | Stroke                                  | 3.7% (2.8–4.6%)      | 34.8 (25.3–45.4)    | -17.8% (-31.8 to -1.1%)  | 3.2% (2.4–4%)           | 1.5 (1–2)          | -17.3% (-33.5 to 1%)     |
|                                            | Ischaemic stroke                        | 3.4% (2.6–4.3%)      | 22.1 (15.8–29)      | -19.7% (-32.8 to -3.4%)  | 3% (2.2–3.9%)           | 1 (0.7–1.4)        | -19.2% (-34.7 to -0.4%)  |
| Short gestation                            | Intracerebral haemorrhage               | 4.3% (3.2–5.3%)      | 10.5 (7.5–13.8)     | -8.7% (-29.3 to 15.3%)   | 3.6% (2.7–4.5%)         | 0.4 (0.3–0.5)      | -8.8% (-31.8 to 17.5%)   |
|                                            | Subarachnoid haemorrhage                | 4.7% (3.6–6%)        | 2.2 (1.6–3)         | -33.7% (-48.7 to -7.8%)  | 4.2% (3.2–5.2%)         | 0.1 (0–0.1)        | -30.9% (-49.2 to -1.9%)  |
|                                            | Meningitis                              | 4.6% (3.6–4%)        | 0.9 (0.5–1.4)       | -58% (-75.4 to -34.3%)   | 2.6% (1.6–3.8%)         | <0.1 (<0.1–<0.1)   | -58% (-75.4 to -34.3%)   |
| Smoking                                    | Encephalitis                            | 1.7% (1.2–2.3%)      | 0.2 (0.1–0.3)       | -1.4% (-38 to 63.2%)     | 1.2% (0.8–1.6%)         | <0.1 (<0.1–<0.1)   | -1.4% (-38 to 63.2%)     |
|                                            | Stroke                                  | 15.4% (13.9–17%)     | 144.9 (117.3–176.4) | -18.7% (-34.1 to 0.3%)   | 11.7% (10.3–13.3%)      | 5.4 (4.3–6.8)      | -11.2% (-30.5 to 12.7%)  |
|                                            | Ischaemic stroke                        | 14% (12.5–15.5%)     | 90.3 (72–109.9)     | -20.8% (-35.5 to -1.6%)  | 10.5% (9.1–12.1%)       | 3.6 (2.8–4.5)      | -11.8% (-32.2 to 13.9%)  |
|                                            | Intracerebral haemorrhage               | 19.1% (17.2–21%)     | 47.1 (37–59.1)      | -8.9% (-30.2 to 18.1%)   | 15.1% (13.4–16.8%)      | 1.6 (1.2–2.1)      | -5% (-28.8 to 27.7%)     |
|                                            | Subarachnoid haemorrhage                | 15.8% (13.8–17.8%)   | 7.4 (5.8–9.4)       | -39.8% (-54.5 to -15.5%) | 13.4% (11.4–15.4%)      | 0.2 (0.2–0.3)      | -36.6% (-55.3 to -4.7%)  |
|                                            | Neurological disorders*                 | 5.3% (1.9–11%)       | 67.6 (24–157.1)     | -4.9% (-21.1 to 17.1%)   | 12.2% (5–19.4%)         | 4 (0.7–11.3)       | 0.9% (-20.3 to 34.8%)    |
|                                            | Alzheimer's disease and other dementias | 18.4% (11.8–25.6%)   | 71.5 (28.7–161.3)   | -8.6% (-24.7 to 10.3%)   | 17% (11–24%)            | 4.3 (1–11.6)       | -1.9% (-22.4 to 22.7%)   |
|                                            | Parkinson's disease                     | -10.5% (-15.4–-5.8%) | -5.9 (-9.1–-3.1)    | -34.7% (-51.7 to -13.6%) | -9.9% (-14.5–-5.3%)     | -0.3 (-0.5–0.2)    | -26.4% (-47 to -0.6%)    |
|                                            | Multiple sclerosis                      | 11.2% (7.8–14.7%)    | 1.9 (1.2–2.8)       | 3% (-15.4 to 26%)        | 12.8% (8.3–17.9%)       | <0.1 (<0.1–<0.1)   | -21.7% (-43.4 to 5.5%)   |
|                                            | Tobacco                                 | Stroke               | 18.5% (16.9–20.2%)  | 174.1 (144.2–209.6)      | -18.3% (-33.4 to -0.4%) | 14.4% (12.9–16.1%) | 6.7 (5.4–8.3)            |
| Ischaemic stroke                           |                                         | 16.9% (15.3–18.6%)   | 109.1 (88.9–132.3)  | -20.4% (-34.5 to -2.6%)  | 13.2% (11.6–14.8%)      | 4.5 (3.6–5.7)      | -13.3% (-31.9 to 10%)    |
| Intracerebral haemorrhage                  |                                         | 22.6% (20.6–24.6%)   | 55.6 (44.2–69)      | -8.7% (-29.5 to 17.2%)   | 18.1% (16.2–20%)        | 1.9 (1.5–2.5)      | -5.6% (-29.2 to 23.3%)   |
| Subarachnoid haemorrhage                   |                                         | 19.8% (17.9–21.9%)   | 9.3 (7.4–11.5)      | -38.3% (-52.6 to -12.9%) | 16.9% (14.9–19.1%)      | 0.3 (0.2–0.3)      | -35% (-52.6 to -5.2%)    |
| Neurological disorders*                    |                                         | 5.3% (1.9–11%)       | 67.6 (24–157.1)     | -4.9% (-21.1 to 17.1%)   | 12.2% (5–19.4%)         | 4 (0.7–11.3)       | 0.9% (-20.3 to 34.8%)    |
| Alzheimer's disease and other dementias    |                                         | 18.4% (11.8–25.6%)   | 71.5 (28.7–161.3)   | -8.6% (-24.7 to 10.3%)   | 17% (11–24%)            | 4.3 (1–11.6)       | -1.9% (-22.4 to 22.7%)   |
| Parkinson's disease                        |                                         | -10.5% (-15.4–-5.8%) | -5.9 (-9.1–-3.1)    | -34.7% (-51.7 to -13.6%) | -9.9% (-14.5–-5.3%)     | -0.3 (-0.5–0.2)    | -26.4% (-47 to -0.6%)    |
| Multiple sclerosis                         |                                         | 11.2% (7.8–14.7%)    | 1.9 (1.2–2.8)       | 3% (-15.4 to 26%)        | 12.8% (8.3–17.9%)       | <0.1 (<0.1–<0.1)   | -21.7% (-43.4 to 5.5%)   |

**Table S16** Regional and national disabilities and deaths related to neurological conditions attributable to risk factors in North Africa and Middle East countries

| Location<br>Risk factor (alphabetic order) | Cause                                   | DALYs (95% UI)     |                     |                           | Deaths (95% UI)    |                  |                          |
|--------------------------------------------|-----------------------------------------|--------------------|---------------------|---------------------------|--------------------|------------------|--------------------------|
|                                            |                                         | PAF (%)            | Rate per 100,000    | Rate change (%)           | PAF (%)            | Rate per 100,000 | Rate change (%)          |
|                                            |                                         | 2019               | 2019                | From 1990 to 2019         | 2019               | 2019             | From 1990 to 2019        |
| <b>Lebanon</b>                             |                                         |                    |                     |                           |                    |                  |                          |
| Air pollution                              | Meningitis                              | 0.4% (0.1–1%)      | 0.1 (0.0–0.3)       | -85.2% (-96.5 to -37.5%)  | 0.2% (0.1–0.5%)    | <0.1 (<0.1–<0.1) | -85.2% (-96.5 to -37.6%) |
|                                            | Encephalitis                            | 0.4% (0.1–0.9%)    | 0.1 (0.0–0.2)       | -23.6% (-84.9 to 286.8%)  | 0.2% (0.1–0.6%)    | <0.1 (<0.1–<0.1) | -23.6% (-84.9 to 287.1%) |
|                                            | Stroke                                  | 22.1% (17.6–26.7%) | 166.1 (115.9–215.8) | -32.7% (-47.6 to -14.7%)  | 17.8% (14.1–21.9%) | 6.3 (4–8.5)      | -39.8% (-55.7 to -18.5%) |
|                                            | Ischaemic stroke                        | 21.3% (16.9–25.9%) | 127.6 (89.1–165.7)  | -10.9% (-30.8 to 10.6%)   | 17.3% (13.6–21.3%) | 5.1 (3.3–6.9)    | -22.9% (-45.9 to 3.1%)   |
|                                            | Intracerebral haemorrhage               | 24.5% (19.7–29.5%) | 31.5 (21.1–45.4)    | -63.1% (-73.9 to -48.6%)  | 20.6% (16.2–25.1%) | 1 (0.7–1.5)      | -68.3% (-78 to -53.6%)   |
|                                            | Subarachnoid haemorrhage                | 26.5% (21.3–31.8%) | 7.1 (4.6–10.2)      | -61% (-76.8 to -36.2%)    | 21.6% (17–26.3%)   | 0.2 (0.1–0.2)    | -72.2% (-86.7 to -46%)   |
| Alcohol use                                | Stroke                                  | 0.6% (0.2–1.1%)    | 4.9 (1.5–9.5)       | -75% (-91 to -56.5%)      | 0.4% (0.1–0.8%)    | 0.2 (0–0.3)      | -79% (-95 to -59.8%)     |
|                                            | Ischaemic stroke                        | 0.3% (-0.1–0.7%)   | 1.7 (-0.8–4.7)      | -65.3% (-144.1 to -18.5%) | 0.2% (-0.2–0.6%)   | 0.1 (0–0.2)      | -71.9% (-171.4 to -9.6%) |
|                                            | Intracerebral haemorrhage               | 2.5% (1.4–3.9%)    | 3.3 (1.7–5.7)       | -78.1% (-87.5 to -65.7%)  | 2% (1.1–3.2%)      | 0.1 (0–0.2)      | -81.4% (-89.9 to -69.4%) |
|                                            | Neurological disorders*                 | 0.3% (0.1–0.7%)    | 4.3 (1.8–8.3)       | -51.4% (-78.9 to 2.9%)    | 0.1% (0–0.3%)      | <0.1 (<0.1–0.1)  | -55.3% (-72.1 to -31.1%) |
|                                            | Idiopathic epilepsy                     | 3.3% (2.4–8%)      | 4.3 (1.8–8.3)       | -51.4% (-78.9 to 2.9%)    | 4.2% (2.6–6.1%)    | <0.1 (<0.1–0.1)  | -55.3% (-72.1 to -31.1%) |
| All risk factors                           | Meningitis                              | 3.3% (1.7–5.5%)    | 1 (0.4–1.7)         | -85.5% (-93.9 to -69%)    | 1.7% (0.8–3%)      | <0.1 (<0.1–<0.1) | -85.5% (-93.9 to -69%)   |
|                                            | Encephalitis                            | 2.6% (1.3–5%)      | 0.4 (0.2–0.9)       | -22.1% (-70.8 to 97.2%)   | 1.8% (0.8–3.7%)    | <0.1 (<0.1–<0.1) | -22.1% (-70.8 to 97.2%)  |
|                                            | Stroke                                  | 87.8% (83.7–92.1%) | 660.8 (511.1–818.3) | -29.8% (-45.1 to -11.7%)  | 84.7% (78.1–92.4%) | 29.8 (20.8–38.6) | -36.2% (-54 to -15%)     |
|                                            | Ischaemic stroke                        | 87.9% (83.2–93.6%) | 525.8 (403.2–644.3) | -10.6% (-31.2 to 10.5%)   | 84.6% (76.9–93.7%) | 24.9 (16.8–32.3) | -21.2% (-47.1 to 3.6%)   |
|                                            | Intracerebral haemorrhage               | 87.2% (83.3–90.7%) | 112 (83.7–151.4)    | -62.2% (-72.6 to -48.1%)  | 85.1% (79.2–90.9%) | 4.3 (3–6)        | -67.2% (-76.9 to -52.5%) |
|                                            | Subarachnoid haemorrhage                | 86.1% (82–89.8%)   | 23 (16.1–31.9)      | -60.3% (-76.6 to -35.5%)  | 83.2% (76.7–89.1%) | 0.6 (0.3–0.9)    | -70.8% (-85.9 to -43.2%) |
|                                            | Neurological disorders*                 | 15% (6.1–29.4%)    | 199.5 (79.5–466.2)  | 21.3% (3.8 to 59.8%)      | 34.6% (17.6–50.5%) | 12.3 (2.4–35.5)  | 26.3% (2.1 to 95.8%)     |
|                                            | Alzheimer's disease and other dementias | 51.1% (36.7–64.9%) | 202.1 (81.7–468.2)  | 23.8% (6.5 to 66.9%)      | 48% (33.6–62.5%)   | 12.9 (2.9–36)    | 26% (2.2 to 92.8%)       |
|                                            | Parkinson's disease                     | -17% (-25.5–9%)    | -11.8 (-19.1–6)     | 8.8% (-22.7 to 55.2%)     | -15% (-22.6–7.9%)  | -0.7 (-1.1–0.3)  | 9.6% (-24.5 to 62.9%)    |
|                                            | Idiopathic epilepsy                     | 3.3% (2.4–8%)      | 4.3 (1.8–8.3)       | -51.4% (-78.9 to 2.9%)    | 4.2% (2.6–6.1%)    | <0.1 (<0.1–0.1)  | -55.3% (-72.1 to -31.1%) |
|                                            | Multiple sclerosis                      | 21.4% (16.2–26.9%) | 5 (3.4–7)           | 47% (13.9 to 92.5%)       | 22% (16.4–28.1%)   | 0.1 (0–0.1)      | 27.9% (-19.3 to 97.7%)   |
| Ambient particulate matter pollution       | Meningitis                              | 0.4% (0.1–1%)      | 0.1 (0.0–0.3)       | -80.5% (-95.8 to -17.2%)  | 0.2% (0.1–0.5%)    | <0.1 (<0.1–<0.1) | -80.5% (-95.8 to -17.2%) |
|                                            | Encephalitis                            | 0.4% (0.1–0.9%)    | 0.1 (0.0–0.2)       | 0.5% (-79.3 to 422.9%)    | 0.2% (0.1–0.6%)    | <0.1 (<0.1–<0.1) | 0.5% (-79.3 to 422.8%)   |
|                                            | Stroke                                  | 22% (17.4–26.6%)   | 165.6 (115.7–215.5) | -14.7% (-35.1 to 15.8%)   | 17.8% (14–21.9%)   | 6.3 (4–8.5)      | -23.7% (-46.8 to 7.8%)   |
|                                            | Ischaemic stroke                        | 21.3% (16.8–25.8%) | 127.2 (88.5–165.1)  | 12.9% (-15.8 to 50.2%)    | 17.2% (13.5–21.2%) | 5.1 (3.2–6.9)    | -2.3% (-33.5 to 35.7%)   |
|                                            | Intracerebral haemorrhage               | 24.4% (19.6–29.5%) | 31.4 (21–45.2)      | -53.4% (-67.4 to -31.9%)  | 20.5% (16.1–25%)   | 1 (0.7–1.5)      | -59.9% (-72.9 to -39%)   |
|                                            | Subarachnoid haemorrhage                | 26.4% (21.2–31.6%) | 7.1 (4.6–10.2)      | -50.2% (-71 to -15.1%)    | 21.5% (16.9–26.2%) | 0.2 (0.1–0.2)    | -64.6% (-83.3 to -29.7%) |
| Behavioural risk factors‡                  | Meningitis                              | 3.2% (1.6–5.4%)    | 0.9 (0.4–1.6)       | -85.4% (-93.8 to -68.6%)  | 1.6% (0.7–2.9%)    | <0.1 (<0.1–<0.1) | -85.4% (-93.8 to -68.6%) |
|                                            | Encephalitis                            | 2.6% (1.3–4.8%)    | 0.4 (0.2–0.9)       | -21.1% (-70.3 to 98.9%)   | 1.7% (0.8–3.5%)    | <0.1 (<0.1–<0.1) | -21.1% (-70.3 to 98.9%)  |
|                                            | Stroke                                  | 44.5% (39.7–49.8%) | 335.1 (254.2–430.9) | -21.9% (-39 to -1.9%)     | 37.9% (32.4–44.1%) | 13.3 (9.1–18)    | -29.6% (-50.3 to -5.7%)  |

**Table S16** Regional and national disabilities and deaths related to neurological conditions attributable to risk factors in North Africa and Middle East countries

| Location<br>Risk factor (alphabetic order) | Cause                                   | DALYs (95% UI)     |                     |                          | Deaths (95% UI)    |                  |                          |
|--------------------------------------------|-----------------------------------------|--------------------|---------------------|--------------------------|--------------------|------------------|--------------------------|
|                                            |                                         | PAF (%)            | Rate per 100,000    | Rate change (%)          | PAF (%)            | Rate per 100,000 | Rate change (%)          |
|                                            |                                         | 2019               | 2019                | From 1990 to 2019        | 2019               | 2019             | From 1990 to 2019        |
| Child and maternal malnutrition            | Ischaemic stroke                        | 45.2% (39.5–51.4%) | 269.9 (200.9–343.6) | -1.5% (-24.2 to 21.4%)   | 38.5% (32–45.5%)   | 11.3 (7.2–15.5)  | -14.8% (-44 to 13.9%)    |
|                                            | Intracerebral haemorrhage               | 41.8% (37.1–46.9%) | 53.8 (39.1–75.6)    | -58.7% (-70.8 to -42%)   | 35% (30.1–40.3%)   | 1.8 (1.2–2.5)    | -63.9% (-75 to -46.6%)   |
|                                            | Subarachnoid haemorrhage                | 42.6% (37.5–47.7%) | 11.4 (7.8–16.2)     | -53.9% (-73 to -24.5%)   | 35.2% (30.1–40.6%) | 0.3 (0.1–0.4)    | -66.6% (-84.2 to -35%)   |
|                                            | Neurological disorders*                 | 8.3% (3.3–16.9%)   | 110.6 (41.4–258)    | 15% (-7.2 to 51.9%)      | 16.9% (6.4–26.4%)  | 6.1 (0.9–17.8)   | 21% (-9 to 91.1%)        |
|                                            | Alzheimer's disease and other dementias | 28.6% (18.5–37.6%) | 113.1 (45–260.3)    | 19.3% (-3.1 to 61.1%)    | 24.9% (15.7–33.3%) | 6.7 (1.5–18.3)   | 20.8% (-7.7 to 83.5%)    |
|                                            | Parkinson's disease                     | -17% (-25.5–9%)    | -11.8 (-19.1–6)     | 8.8% (-22.7 to 55.2%)    | -15% (-22.6–7.9%)  | -0.7 (-1.1–0.3)  | 9.6% (-24.5 to 62.9%)    |
|                                            | Idiopathic epilepsy                     | 3.3% (2.4–8%)      | 4.3 (1.8–8.3)       | -51.4% (-78.9 to 2.9%)   | 4.2% (2.6–6.1%)    | <0.1 (<0.1–0.1)  | -55.3% (-72.1 to -31.1%) |
|                                            | Multiple sclerosis                      | 21.4% (16.2–26.9%) | 5 (3.4–7)           | 47% (13.9 to 92.5%)      | 22% (16.4–28.1%)   | 0.1 (0–0.1)      | 27.9% (-19.3 to 97.7%)   |
|                                            | Meningitis                              | 3.2% (1.6–5.4%)    | 0.9 (0.4–1.6)       | -85.4% (-93.8 to -68.6%) | 1.6% (0.7–2.9%)    | <0.1 (<0.1–<0.1) | -85.4% (-93.8 to -68.6%) |
|                                            | Encephalitis                            | 2.6% (1.3–4.8%)    | 0.4 (0.2–0.9)       | -21.1% (-70.3 to 98.9%)  | 1.7% (0.8–3.5%)    | <0.1 (<0.1–<0.1) | -21.1% (-70.3 to 98.9%)  |
| Diet high in red meat                      | Stroke                                  | 5.8% (2.5–8.1%)    | 43.3 (17.1–65.9)    | -20.9% (-45.3 to 13.4%)  | 3.9% (1.6–5.7%)    | 1.4 (0.5–2.2)    | -32.9% (-58 to -3%)      |
|                                            | Ischaemic stroke                        | 5.3% (1.5–7.7%)    | 31.6 (7.7–50)       | 9.8% (-16.3 to 57.6%)    | 3.6% (0.9–5.4%)    | 1.1 (0.2–1.7)    | -9.3% (-40.2 to 32.6%)   |
|                                            | Intracerebral haemorrhage               | 7.3% (2.1–11.1%)   | 9.5 (2.5–16.5)      | -55.5% (-68.6 to -30.2%) | 5.7% (1.4–8.7%)    | 0.3 (0.1–0.5)    | -62.6% (-74.7 to -40.2%) |
| Diet high in sodium                        | Subarachnoid haemorrhage                | 8.4% (2.4–12.6%)   | 2.2 (0.6–3.9)       | -52.6% (-72 to -13.2%)   | 6.1% (1.6–9.4%)    | <0.1 (<0.1–0.1)  | -67.1% (-84.3 to -28%)   |
|                                            | Stroke                                  | 1.7% (0.3–7%)      | 13.2 (1.9–54.9)     | -32.5% (-60.3 to 16.9%)  | 1.4% (0.3–5.6%)    | 0.5 (0.1–2.1)    | -39.2% (-69.4 to 8.5%)   |
|                                            | Ischaemic stroke                        | 1.6% (0.3–6.6%)    | 9.9 (1.5–40.9)      | -9.5% (-49.2 to 53.6%)   | 1.3% (0.3–5.3%)    | 0.4 (0.1–1.7)    | -19.9% (-63.5 to 38.3%)  |
| Diet low in fibre                          | Intracerebral haemorrhage               | 2.1% (0.3–8.5%)    | 2.8 (0.3–12)        | -62% (-78.6 to -29.6%)   | 1.8% (0.3–7.5%)    | 0.1 (0–0.4)      | -67.4% (-82.4 to -41.8%) |
|                                            | Subarachnoid haemorrhage                | 2.1% (0.2–8.2%)    | 0.6 (0.1–2.3)       | -58.5% (-81.7 to -14%)   | 1.8% (0.3–7.4%)    | <0.1 (<0.1–0.1)  | -70.2% (-88.2 to -30.7%) |
|                                            | Stroke                                  | 1% (0.3–2.3%)      | 7.7 (2.1–17.2)      | -1.3% (-33.5 to 36.2%)   | 0.9% (0.3–1.9%)    | 0.3 (0.1–0.7)    | -25.2% (-55.6 to 15.9%)  |
| Diet low in fruits                         | Ischaemic stroke                        | 1% (0.3–2.2%)      | 5.8 (1.6–13.3)      | 25.7% (-18.1 to 71.8%)   | 0.9% (0.3–1.8%)    | 0.3 (0.1–0.5)    | -8.3% (-47.6 to 45.8%)   |
|                                            | Intracerebral haemorrhage               | 1.2% (0.3–2.7%)    | 1.5 (0.4–3.7)       | -42.5% (-64.1 to -16%)   | 1% (0.3–2.3%)      | 0.1 (0–0.1)      | -58% (-75.2 to -33.5%)   |
|                                            | Subarachnoid haemorrhage                | 1.3% (0.3–3%)      | 0.4 (0.1–0.9)       | -36.8% (-66.1 to 9.7%)   | 1.1% (0.3–2.4%)    | <0.1 (<0.1–<0.1) | -60.3% (-82.5 to -19.1%) |
| Diet low in vegetables                     | Stroke                                  | 1.9% (0.8–3.2%)    | 14.4 (6–25.8)       | 57% (-9.1 to 153.1%)     | 1.2% (0.5–2.1%)    | 0.4 (0.2–0.8)    | 5.3% (-44.4 to 94.4%)    |
|                                            | Ischaemic stroke                        | 1.5% (0.4–3%)      | 9.2 (2–18.7)        | 121.9% (5.9 to 253.6%)   | 1% (0.3–2%)        | 0.3 (0.1–0.6)    | 30.1% (-37.1 to 160.6%)  |
|                                            | Intracerebral haemorrhage               | 3.2% (1.5–5.4%)    | 4.2 (1.7–7.6)       | 4.6% (-34.6 to 72.8%)    | 2.3% (1.3–8%)      | 0.1 (0–0.2)      | -25.3% (-57.7 to 37.1%)  |
| Diet low in whole grains                   | Subarachnoid haemorrhage                | 4% (1.8–6.9%)      | 1.1 (0.4–2)         | 1.3% (-45.4 to 92.5%)    | 2.6% (1.2–4.5%)    | <0.1 (<0.1–<0.1) | -31.6% (-70.4 to 50%)    |
|                                            | Stroke                                  | 0.2% (0.2–0.3%)    | 1.8 (1.3–2.5)       | -30% (-51.8 to -2.5%)    | 0.3% (0.2–0.4%)    | 0.1 (0.1–0.2)    | -36.3% (-62.4 to 0.8%)   |
|                                            | Ischaemic stroke                        | 0.2% (0.2–0.3%)    | 1.4 (1.2–1)         | -11.6% (-40.5 to 23.1%)  | 0.3% (0.2–0.4%)    | 0.1 (0–0.1)      | -21.7% (-54.8 to 26.4%)  |
| Diet low in whole grains                   | Intracerebral haemorrhage               | 0.2% (0.2–0.3%)    | 0.3 (0.2–0.5)       | -63.1% (-75.1 to -43.8%) | 0.3% (0.2–0.5%)    | <0.1 (<0.1–<0.1) | -67.9% (-80.6 to -46.4%) |
|                                            | Subarachnoid haemorrhage                | 0.2% (0.2–0.3%)    | 0.1 (0–0.1)         | -61.2% (-77.9 to -35.6%) | 0.2% (0.2–0.5%)    | <0.1 (<0.1–<0.1) | -70.5% (-86.7 to -38.9%) |
|                                            | Stroke                                  | 7.5% (4.1–9.6%)    | 56.5 (30.5–79.8)    | -12% (-31.9 to 7.9%)     | 6.9% (4.2–8.7%)    | 2.4 (1.3–3.5)    | -23.8% (-47.2 to 0.4%)   |
| Diet low in whole grains                   | Ischaemic stroke                        | 9.5% (5.2–12.1%)   | 56.5 (30.5–79.8)    | -12% (-31.9 to 7.9%)     | 8.3% (5–10.3%)     | 2.4 (1.3–3.5)    | -23.8% (-47.2 to 0.4%)   |

**Table S16** Regional and national disabilities and deaths related to neurological conditions attributable to risk factors in North Africa and Middle East countries

| Location<br>Risk factor (alphabetic order) | Cause                                   | DALYs (95% UI)     |                     |                             | Deaths (95% UI)    |                  |                           |
|--------------------------------------------|-----------------------------------------|--------------------|---------------------|-----------------------------|--------------------|------------------|---------------------------|
|                                            |                                         | PAF (%)            | Rate per 100,000    | Rate change (%)             | PAF (%)            | Rate per 100,000 | Rate change (%)           |
|                                            |                                         | 2019               | 2019                | From 1990 to 2019           | 2019               | 2019             | From 1990 to 2019         |
| Dietary risks                              | Stroke                                  | 16.8% (12.2–21.6%) | 126.7 (82.7–178.7)  | -15.5% (-35.7 to 6%)        | 13.9% (10.1–17.8%) | 4.9 (2.9–7)      | -27.8% (-52 to -4.2%)     |
|                                            | Ischaemic stroke                        | 17.7% (12.1–22.4%) | 105.5 (65.5–147.9)  | -2% (-23.1 to 20.1%)        | 14.5% (10.3–18.5%) | 4.3 (2.5–6.2)    | -18.1% (-45.7 to 7.8%)    |
|                                            | Intracerebral haemorrhage               | 13.3% (7.2–19.5%)  | 17.1 (8.4–28.9)     | -50.5% (-66 to -23.4%)      | 10.6% (5.5–16.3%)  | 0.5 (0.2–0.9)    | -59.7% (-73.4 to -37%)    |
|                                            | Subarachnoid haemorrhage                | 15% (8.4–21.3%)    | 4 (2–6.4)           | -46.8% (-68.9 to 0.2%)      | 11.3% (6–17%)      | 0.1 (0–0.1)      | -63.6% (-82.3 to -22.2%)  |
| Environmental/occupational risk factors§   | Meningitis                              | 0.4% (0.1–1%)      | 0.1 (0–0.3)         | -85.2% (-96.5 to -37.5%)    | 0.2% (0.1–0.5%)    | <0.1 (<0.1–<0.1) | -85.2% (-96.5 to -37.6%)  |
|                                            | Encephalitis                            | 0.4% (0.1–0.9%)    | 0.1 (0–0.2)         | -23.6% (-84.9 to 286.8%)    | 0.2% (0.1–0.6%)    | <0.1 (<0.1–<0.1) | -23.6% (-84.9 to 287.1%)  |
|                                            | Stroke                                  | 29.2% (24.5–33.6%) | 220.2 (158.5–284.5) | -37.1% (-50.9 to -19.8%)    | 27.9% (23.4–31.9%) | 9.8 (6.6–13.2)   | -41.4% (-57 to -20.9%)    |
|                                            | Ischaemic stroke                        | 28.5% (23.9–32.7%) | 170.4 (123.3–218.4) | -16.7% (-36 to 4%)          | 27.4% (22.9–31.4%) | 8.1 (5.4–10.9)   | -25.7% (-48.4 to -1.6%)   |
| High body-mass index                       | Intracerebral haemorrhage               | 32% (26.8–36.7%)   | 41.2 (28.9–58.7)    | -65.8% (-75.6 to -52.4%)    | 30.5% (25.7–35%)   | 1.5 (1–2.2)      | -69.7% (-78.8 to -56.2%)  |
|                                            | Subarachnoid haemorrhage                | 32.3% (26.9–37.4%) | 8.6 (5.8–12.3)      | -65.3% (-79.7 to -42.3%)    | 31.2% (26.3–35.8%) | 0.2 (0.1–0.3)    | -73.3% (-87.1 to -49%)    |
|                                            | Stroke                                  | 32.7% (22.4–42.4%) | 246.6 (159.2–364.3) | -18.4% (-38 to 7%)          | 19% (11.4–27.4%)   | 6.7 (3.6–11.1)   | -26.8% (-49.6 to 3.7%)    |
|                                            | Ischaemic stroke                        | 28.3% (18.9–37.4%) | 169.1 (107.1–250.3) | 22.8% (-6.7 to 58%)         | 16.3% (9.2–24.4%)  | 4.8 (2.4–8.1)    | 9.3% (-29 to 54.5%)       |
| High fasting plasma glucose                | Intracerebral haemorrhage               | 48.7% (36–60.1%)   | 62.6 (40.1–94)      | -53.1% (-67.2 to -31.7%)    | 32.4% (21.2–44.8%) | 1.6 (0.9–2.7)    | -59% (-72.6 to -36.5%)    |
|                                            | Subarachnoid haemorrhage                | 55.8% (42.8–67.1%) | 14.9 (9.5–21.9)     | -52.1% (-71.3 to -21.3%)    | 36.1% (23.8–48.4%) | 0.3 (0.1–0.4)    | -66.1% (-83.8 to -33.3%)  |
|                                            | Neurological disorders*                 | 6% (1.7–13.6%)     | 78.9 (21.7–196)     | 39.9% (14.4 to 96%)         | 14.7% (5.3–27.3%)  | 5.1 (0.9–14.8)   | 41.4% (9.6 to 122.7%)     |
|                                            | Alzheimer's disease and other dementias | 19.9% (8.5–34.9%)  | 78.9 (21.7–196)     | 39.9% (14.4 to 96%)         | 19.2% (8.1–34%)    | 5.1 (0.9–14.8)   | 41.4% (9.6 to 122.7%)     |
| High LDL cholesterol                       | Stroke                                  | 31.1% (18.8–53%)   | 234.3 (122.7–400.6) | 7.4% (-25.7 to 51.7%)       | 31.9% (16.9–63.5%) | 11.2 (5–22.6)    | -8.2% (-40.3 to 34.3%)    |
|                                            | Ischaemic stroke                        | 32.4% (17.2–59.2%) | 194 (91.2–359.7)    | 31.1% (-9.1 to 87%)         | 32.3% (14.9–70.2%) | 9.5 (3.6–20.9)   | 10.1% (-28.8 to 64.5%)    |
|                                            | Intracerebral haemorrhage               | 26.6% (16.8–38.6%) | 34.3 (19.1–57)      | -42.7% (-61.6 to -14.7%)    | 29.8% (17.7–49.1%) | 1.5 (0.8–2.8)    | -51.6% (-68.1 to -24.6%)  |
|                                            | Subarachnoid haemorrhage                | 22.3% (13.9–31.9%) | 6 (3.3–9.8)         | -42.3% (-68.3 to 5.7%)      | 28.4% (17–46.4%)   | 0.2 (0.1–0.4)    | -56.7% (-79.5 to -8.1%)   |
|                                            | Neurological disorders*                 | 4.3% (0.8–11.8%)   | 57.1 (10.2–187.2)   | 51.7% (32.9 to 109.5%)      | 11% (2.5–24.5%)    | 3.9 (0.4–15)     | 50.8% (25.4 to 134.9%)    |
|                                            | Alzheimer's disease and other dementias | 14.4% (3.6–29.6%)  | 57.1 (10.2–187.2)   | 51.7% (32.9 to 109.5%)      | 14.5% (3.6–29.6%)  | 3.9 (0.4–15)     | 50.8% (25.4 to 134.9%)    |
| High systolic blood pressure               | Stroke                                  | 21.6% (12.4–35.3%) | 162.5 (86.2–271.8)  | -4.6% (-25.1 to 21%)        | 18.8% (6.1–39.9%)  | 6.6 (2–14)       | -18.3% (-44.9 to 13.1%)   |
|                                            | Ischaemic stroke                        | 27.2% (15.4–44.2%) | 162.5 (86.2–271.8)  | -4.6% (-25.1 to 21%)        | 22.4% (7.3–47.8%)  | 6.6 (2–14)       | -18.3% (-44.9 to 13.1%)   |
| High temperature                           | Stroke                                  | 51.4% (43.1–59.6%) | 387.3 (281.4–503.4) | -28.3% (-45.9 to -6.1%)     | 44.9% (35.1–55.9%) | 15.8 (10–22.3)   | -37.5% (-57.3 to -12%)    |
|                                            | Ischaemic stroke                        | 49.5% (39.6–58.8%) | 295.9 (205.3–388.4) | -5.6% (-28.6 to 21.6%)      | 43% (32–56.1%)     | 12.7 (7.5–18.4)  | -19.8% (-47.9 to 11.2%)   |
|                                            | Intracerebral haemorrhage               | 58.6% (49.4–67.4%) | 75.3 (51.2–107.1)   | -60.2% (-71.4 to -42.5%)    | 54.4% (42.4–65.9%) | 2.7 (1.8–4)      | -66.5% (-77.4 to -49.9%)  |
|                                            | Subarachnoid haemorrhage                | 60.2% (49.7–69.3%) | 16.1 (10.7–23.6)    | -56.7% (-74.9 to -28.3%)    | 54.8% (43.3–66%)   | 0.4 (0.2–0.6)    | -69.8% (-85.6 to -40.1%)  |
| High temperature                           | Stroke                                  | 0% (0–0%)          | 0 (-0.2–0.3)        | -89.2% (-944.4 to 995.2%)   | 0% (0–0%)          | <0.1 (<0.1–<0.1) | -89.6% (-975 to 1070.3%)  |
|                                            | Ischaemic stroke                        | 0% (0–0%)          | 0 (-0.2–0.2)        | -86.6% (-1235.7 to 1363.2%) | 0% (0–0%)          | <0.1 (<0.1–<0.1) | -87.7% (-1212 to 1292.2%) |

**Table S16** Regional and national disabilities and deaths related to neurological conditions attributable to risk factors in North Africa and Middle East countries

| Location<br>Risk factor (alphabetic order) | Cause                                   | DALYs (95% UI)     |                     |                           | Deaths (95% UI)    |                  |                           |
|--------------------------------------------|-----------------------------------------|--------------------|---------------------|---------------------------|--------------------|------------------|---------------------------|
|                                            |                                         | PAF (%)            | Rate per 100,000    | Rate change (%)           | PAF (%)            | Rate per 100,000 | Rate change (%)           |
|                                            |                                         | 2019               | 2019                | From 1990 to 2019         | 2019               | 2019             | From 1990 to 2019         |
| Household air pollution from solid fuels   | Intracerebral haemorrhage               | 0% (0–0%)          | <0.1 (<0.1–0.1)     | -92.9% (-566.3 to 560.4%) | 0% (0–0%)          | <0.1 (<0.1–<0.1) | -93.4% (-560.4 to 531.1%) |
|                                            | Subarachnoid haemorrhage                | 0% (0–0%)          | <0.1 (<0.1–<0.1)    | -92.1% (-447.1 to 485.6%) | 0% (0–0%)          | <0.1 (<0.1–<0.1) | -92.7% (-458 to 507.9%)   |
|                                            | Meningitis                              | 0% (0–0%)          | <0.1 (<0.1–<0.1)    | -99.8% (-100 to -99%)     | 0% (0–0%)          | <0.1 (<0.1–<0.1) | -99.8% (-100 to -99%)     |
|                                            | Encephalitis                            | 0% (0–0%)          | <0.1 (<0.1–<0.1)    | -98.8% (-99.8 to -92.1%)  | 0% (0–0%)          | <0.1 (<0.1–<0.1) | -98.8% (-99.8 to -92.1%)  |
|                                            | Stroke                                  | 0.1% (0–0.2%)      | 0.5 (0.2–1.3)       | -99% (-99.7 to -97.6%)    | 0.1% (0–0.1%)      | <0.1 (<0.1–<0.1) | -99.1% (-99.7 to -97.8%)  |
|                                            | Ischaemic stroke                        | 0.1% (0–0.2%)      | 0.4 (0.1–1)         | -98.7% (-99.6 to -96.8%)  | 0.1% (0–0.1%)      | <0.1 (<0.1–<0.1) | -98.9% (-99.7 to -97.1%)  |
|                                            | Intracerebral haemorrhage               | 0.1% (0–0.2%)      | 0.1 (0–0.2)         | -99.5% (-99.8 to -98.6%)  | 0.1% (0–0.1%)      | <0.1 (<0.1–<0.1) | -99.5% (-99.9 to -98.8%)  |
| Kidney dysfunction                         | Subarachnoid haemorrhage                | 0.1% (0–0.2%)      | <0.1 (<0.1–0.1)     | -99.4% (-99.8 to -98.3%)  | 0.1% (0–0.2%)      | <0.1 (<0.1–<0.1) | -99.6% (-99.9 to -98.7%)  |
|                                            | Stroke                                  | 12% (8.8–14.8%)    | 90.2 (60.1–122.1)   | -1.5% (-25 to 25.7%)      | 10.5% (5.6–14.7%)  | 3.7 (1.7–5.7)    | -13.9% (-45.1 to 18%)     |
|                                            | Ischaemic stroke                        | 12.9% (8.9–16.3%)  | 76.9 (48.1–104.8)   | 21.5% (-9.3 to 51.3%)     | 10.4% (4.7–15.5%)  | 3.1 (1.2–5)      | 5.9% (-35.4 to 44.1%)     |
| Lead exposure                              | Intracerebral haemorrhage               | 10.4% (8.3–12.5%)  | 13.3 (8.6–19.1)     | -52.9% (-66 to -33.9%)    | 12.3% (8.8–15.6%)  | 0.6 (0.4–0.9)    | -55.3% (-69.6 to -34.5%)  |
|                                            | Stroke                                  | 2.7% (1.2–4.6%)    | 20.6 (8.1–37)       | -53.9% (-68.3 to -40.4%)  | 3.2% (1.6–5.1%)    | 1.1 (0.5–2)      | -48.8% (-66.6 to -29.8%)  |
|                                            | Ischaemic stroke                        | 2.8% (1.2–4.7%)    | 16.7 (6.7–29.7)     | -36.4% (-55.9 to -17.9%)  | 3.1% (1.5–5.2%)    | 0.9 (0.4–1.7)    | -32% (-54.5 to -8.9%)     |
| Low birth weight                           | Intracerebral haemorrhage               | 2.6% (0.9–4.8%)    | 3.3 (1.1–6.8)       | -78.9% (-87 to -69.8%)    | 3.4% (1.5–5.8%)    | 0.2 (0.1–0.3)    | -76.3% (-84.6 to -65.8%)  |
|                                            | Subarachnoid haemorrhage                | 2% (0.6–4.2%)      | 0.5 (0.1–1.2)       | -80.5% (-91.4 to -66.3%)  | 3.1% (1.2–5.3%)    | <0.1 (<0.1–<0.1) | -79.4% (-90.6 to -60.2%)  |
|                                            | Meningitis                              | 2.9% (1.5–4.9%)    | 0.8 (0.4–1.5)       | -85.5% (-93.8 to -68.5%)  | 1.5% (0.7–2.6%)    | <0.1 (<0.1–<0.1) | -85.5% (-93.8 to -68.5%)  |
| Low birth weight and short gestation       | Encephalitis                            | 2.3% (1.2–4.4%)    | 0.4 (0.2–0.8)       | -22.3% (-69.8 to 97.3%)   | 1.6% (0.7–3.2%)    | <0.1 (<0.1–<0.1) | -22.3% (-69.8 to 97.3%)   |
|                                            | Meningitis                              | 3.2% (1.6–5.4%)    | 0.9 (0.4–1.6)       | -85.4% (-93.8 to -68.6%)  | 1.6% (0.7–2.9%)    | <0.1 (<0.1–<0.1) | -85.4% (-93.8 to -68.6%)  |
| Low physical activity                      | Encephalitis                            | 2.6% (1.3–4.8%)    | 0.4 (0.2–0.9)       | -21.1% (-70.3 to 98.9%)   | 1.7% (0.8–3.5%)    | <0.1 (<0.1–<0.1) | -21.1% (-70.3 to 98.9%)   |
|                                            | Stroke                                  | 6.6% (1.4–14.4%)   | 49.6 (10.1–109.7)   | -8.1% (-32.5 to 15.5%)    | 8.3% (2–16.5%)     | 2.9 (0.6–6.1)    | -18.8% (-45.9 to 10.3%)   |
| Low temperature                            | Ischaemic stroke                        | 8.3% (1.7–18%)     | 49.6 (10.1–109.7)   | -8.1% (-32.5 to 15.5%)    | 9.9% (2.4–19.8%)   | 2.9 (0.6–6.1)    | -18.8% (-45.9 to 10.3%)   |
|                                            | Stroke                                  | 6.5% (4.5–8.7%)    | 49.4 (27.2–72.1)    | -45.6% (-61.8 to -26.3%)  | 9.3% (6.6–12.1%)   | 3.3 (1.9–4.7)    | -42.9% (-58.6 to -23.7%)  |
|                                            | Ischaemic stroke                        | 6.3% (4.2–8.5%)    | 38.1 (21.5–55.7)    | -27.1% (-48.8 to -2.6%)   | 9.3% (6.6–12.1%)   | 2.8 (1.6–4)      | -29.3% (-51.2 to -6.9%)   |
| Metabolic risk factors†                    | Intracerebral haemorrhage               | 7.5% (5.2–9.9%)    | 9.7 (5.7–15.3)      | -69.8% (-78.9 to -56.3%)  | 9.3% (6.6–12.1%)   | 0.5 (0.3–0.7)    | -70.8% (-79.4 to -57.5%)  |
|                                            | Subarachnoid haemorrhage                | 5.8% (3.8–8.1%)    | 1.6 (0.8–2.5)       | -75.2% (-88 to -53.5%)    | 9.3% (6.6–12.1%)   | 0.1 (0–0.1)      | -74.3% (-87.4 to -50.5%)  |
|                                            | Stroke                                  | 75.9% (68.2–84.5%) | 571.6 (423–723.8)   | -25.3% (-41.5 to -6%)     | 70.3% (58.2–84.9%) | 24.7 (16.3–33.3) | -33% (-53.1 to -10%)      |
|                                            | Ischaemic stroke                        | 75.8% (66.5–86.6%) | 453.4 (337.9–572.5) | -5.3% (-27 to 18.9%)      | 69.8% (55.9–87%)   | 20.5 (13.1–28.1) | -17.1% (-46.4 to 10.9%)   |
|                                            | Intracerebral haemorrhage               | 76.5% (68.9–82.7%) | 98.3 (71.5–135.5)   | -59.2% (-70.5 to -43%)    | 72.9% (63.3–82.1%) | 3.7 (2.5–5.2)    | -65.1% (-75.7 to -48.8%)  |
|                                            | Subarachnoid haemorrhage                | 74.8% (66.6–81.6%) | 20 (13.7–28.1)      | -56.6% (-74.5 to -29.1%)  | 69.5% (59.1–79.6%) | 0.5 (0.3–0.7)    | -69% (-85 to -38.6%)      |
|                                            | Neurological disorders*                 | 9.4% (3.2–20%)     | 124.6 (38–311.9)    | 40.3% (18.9 to 92%)       | 23.6% (9.5–39.8%)  | 8.3 (1.4–24.5)   | 41% (13.6 to 115.7%)      |
| Non-optimal temperature                    | Alzheimer's disease and other dementias | 31.5% (15.7–50.1%) | 124.6 (38–311.9)    | 40.3% (18.9 to 92%)       | 30.9% (14.9–49.3%) | 8.3 (1.4–24.5)   | 41% (13.6 to 115.7%)      |
|                                            | Stroke                                  | 6.5% (4.5–8.7%)    | 49.4 (27.2–72.2)    | -45.6% (-61.8 to -26.3%)  | 9.3% (6.6–12.1%)   | 3.3 (1.9–4.7)    | -42.9% (-58.6 to -23.8%)  |

**Table S16** Regional and national disabilities and deaths related to neurological conditions attributable to risk factors in North Africa and Middle East countries

| Location<br>Risk factor (alphabetic order) | Cause                                   | DALYs (95% UI)     |                     |                          | Deaths (95% UI)    |                  |                          |
|--------------------------------------------|-----------------------------------------|--------------------|---------------------|--------------------------|--------------------|------------------|--------------------------|
|                                            |                                         | PAF (%)            | Rate per 100,000    | Rate change (%)          | PAF (%)            | Rate per 100,000 | Rate change (%)          |
|                                            |                                         | 2019               | 2019                | From 1990 to 2019        | 2019               | 2019             | From 1990 to 2019        |
| Other environmental risks                  | Ischaemic stroke                        | 6.3% (4.2–8.5%)    | 38.2 (21.4–55.7)    | -27.2% (-48.9 to -2.6%)  | 9.3% (6.6–12.1%)   | 2.8 (1.6–4)      | -29.3% (-51.2 to -7.2%)  |
|                                            | Intracerebral haemorrhage               | 7.5% (5.3–9.9%)    | 9.7 (5.7–15.3)      | -69.8% (-79 to -56.3%)   | 9.3% (6.6–12.1%)   | 0.5 (0.3–0.7)    | -70.9% (-79.4 to -57.5%) |
|                                            | Subarachnoid haemorrhage                | 5.8% (3.8–8.1%)    | 1.6 (0.8–2.5)       | -75.2% (-88 to -53.4%)   | 9.3% (6.6–12.1%)   | 0.1 (0–0.1)      | -74.3% (-87.5 to -50.4%) |
|                                            | Stroke                                  | 2.7% (1.2–4.6%)    | 20.6 (8.1–37)       | -53.9% (-68.3 to -40.4%) | 3.2% (1.6–5.1%)    | 1.1 (0.5–2)      | -48.8% (-66.6 to -29.8%) |
|                                            | Ischaemic stroke                        | 2.8% (1.2–4.7%)    | 16.7 (6.7–29.7)     | -36.4% (-55.9 to -17.9%) | 3.1% (1.5–5.2%)    | 0.9 (0.4–1.7)    | -32% (-54.5 to -8.9%)    |
| Particulate matter pollution               | Intracerebral haemorrhage               | 2.6% (0.9–4.8%)    | 3.3 (1.1–6.8)       | -78.9% (-87 to -69.8%)   | 3.4% (1.5–5.8%)    | 0.2 (0.1–0.3)    | -76.3% (-84.6 to -65.8%) |
|                                            | Subarachnoid haemorrhage                | 2% (0.6–4.2%)      | 0.5 (0.1–1.2)       | -80.5% (-91.4 to -66.3%) | 3.1% (1.2–5.3%)    | <0.1 (<0.1–<0.1) | -79.4% (-90.6 to -60.2%) |
|                                            | Meningitis                              | 0.4% (0.1–1%)      | 0.1 (0–0.3)         | -85.2% (-96.5 to -37.5%) | 0.2% (0.1–0.5%)    | <0.1 (<0.1–<0.1) | -85.2% (-96.5 to -37.6%) |
|                                            | Encephalitis                            | 0.4% (0.1–0.9%)    | 0.1 (0–0.2)         | -23.6% (-84.9 to 286.8%) | 0.2% (0.1–0.6%)    | <0.1 (<0.1–<0.1) | -23.6% (-84.9 to 287.1%) |
|                                            | Stroke                                  | 22.1% (17.6–26.7%) | 166.1 (115.9–215.8) | -32.7% (-47.6 to -14.7%) | 17.8% (14.1–21.9%) | 6.3 (4–8.5)      | -39.8% (-55.7 to -18.5%) |
| Secondhand smoke                           | Ischaemic stroke                        | 21.3% (16.9–25.9%) | 127.6 (89.1–165.7)  | -10.9% (-30.8 to 10.6%)  | 17.3% (13.6–21.3%) | 5.1 (3.3–6.9)    | -22.9% (-45.9 to 3.1%)   |
|                                            | Intracerebral haemorrhage               | 24.5% (19.7–29.5%) | 31.5 (21.1–45.4)    | -63.1% (-73.9 to -48.6%) | 20.6% (16.2–25.1%) | 1 (0.7–1.5)      | -68.3% (-78 to -53.6%)   |
|                                            | Subarachnoid haemorrhage                | 26.5% (21.3–31.8%) | 7.1 (4.6–10.2)      | -61% (-76.8 to -36.2%)   | 21.6% (17–26.3%)   | 0.2 (0.1–0.2)    | -72.2% (-86.7 to -46%)   |
|                                            | Stroke                                  | 4.2% (3.2–5.2%)    | 31.7 (20.8–43.2)    | -30.2% (-47.2 to -9.2%)  | 3.6% (2.7–4.5%)    | 1.3 (0.8–1.8)    | -34.4% (-53.8 to -11.4%) |
|                                            | Ischaemic stroke                        | 3.9% (2.9–4.9%)    | 23.5 (15.3–31.9)    | -3.2% (-27.8 to 22.5%)   | 3.4% (2.6–4.4%)    | 1 (0.6–1.4)      | -14.3% (-43.8 to 14.1%)  |
| Short gestation                            | Intracerebral haemorrhage               | 5.3% (4.6–7%)      | 6.8 (4.3–10.1)      | -60.9% (-72.9 to -43.9%) | 4.5% (3.4–5.6%)    | 0.2 (0.1–0.3)    | -65% (-75.6 to -48.2%)   |
|                                            | Subarachnoid haemorrhage                | 5.4% (4.1–6.9%)    | 1.5 (0.9–2.3)       | -61.9% (-78.7 to -34.5%) | 4.9% (3.6–6.1%)    | <0.1 (<0.1–0.1)  | -69.8% (-85.6 to -41.1%) |
|                                            | Meningitis                              | 2.3% (1.2–3.9%)    | 0.7 (0.3–1.2)       | -82.7% (-92.6 to -63.1%) | 1.2% (0.6–2.1%)    | <0.1 (<0.1–<0.1) | -82.7% (-92.6 to -63.1%) |
|                                            | Encephalitis                            | 1.9% (1–3.6%)      | 0.3 (0.1–0.6)       | -6% (-64.9 to 137.4%)    | 1.3% (0.6–2.6%)    | <0.1 (<0.1–<0.1) | -6% (-64.9 to 137.4%)    |
|                                            | Stroke                                  | 25.8% (23.2–28.6%) | 194 (148.6–249)     | -17.8% (-38.5 to 7.3%)   | 18.4% (16.3–20.9%) | 6.5 (4.6–8.6)    | -25.8% (-49 to 3.6%)     |
| Smoking                                    | Ischaemic stroke                        | 25% (22.5–27.9%)   | 149.6 (114.5–188.1) | 11.2% (-16.8 to 43%)     | 17.5% (15.4–19.8%) | 5.1 (3.5–6.8)    | -1% (-35 to 37.8%)       |
|                                            | Intracerebral haemorrhage               | 28.5% (25.6–31.7%) | 36.6 (26.6–51)      | -56.9% (-70.2 to -38.4%) | 23.3% (20.5–26.7%) | 1.2 (0.8–1.7)    | -61.4% (-74.2 to -42.6%) |
|                                            | Subarachnoid haemorrhage                | 29.4% (25.9–33.4%) | 7.9 (5.3–11.2)      | -52.7% (-73 to -21.4%)   | 24.1% (20.8–27.7%) | 0.2 (0.1–0.3)    | -65.7% (-84.2 to -31.7%) |
|                                            | Neurological disorders*                 | 8% (3–16.5%)       | 106.3 (37.7–253.9)  | 21.7% (-1.5 to 64.9%)    | 16.7% (6.2–26.4%)  | 6.1 (0.9–17.8)   | 22.3% (-8.5 to 95.4%)    |
|                                            | Alzheimer's disease and other dementias | 28.6% (18.5–37.6%) | 113.1 (45–260.3)    | 19.3% (-3.1 to 61.1%)    | 24.9% (15.7–33.3%) | 6.7 (1.5–18.3)   | 20.8% (-7.7 to 83.5%)    |
| Tobacco                                    | Parkinson's disease                     | -17% (-25.5–9%)    | -11.8 (-19.1–6)     | 8.8% (-22.7 to 55.2%)    | -15% (-22.6–7.9%)  | -0.7 (-1.1–0.3)  | 9.6% (-24.5 to 62.9%)    |
|                                            | Multiple sclerosis                      | 21.4% (16.2–26.9%) | 5 (3–4.7)           | 47% (13.9 to 92.5%)      | 22% (16.4–28.1%)   | 0.1 (0–0.1)      | 27.9% (-19.3 to 97.7%)   |
|                                            | Stroke                                  | 28.7% (26.2–31.5%) | 216.3 (167–275.5)   | -20% (-39 to 3.5%)       | 21.2% (19–23.7%)   | 7.5 (5.1–9.8)    | -27.6% (-50.1 to 0.3%)   |
|                                            | Ischaemic stroke                        | 27.8% (25.4–30.5%) | 166.2 (128.6–206)   | 8.5% (-17.5 to 37.7%)    | 20.1% (18–22.4%)   | 5.9 (4–7.8)      | -4% (-36.1 to 30.4%)     |
|                                            | Intracerebral haemorrhage               | 32% (29.2–35.2%)   | 41.2 (30–57.1)      | -57.8% (-70.6 to -40%)   | 26.5% (23.7–29.8%) | 1.3 (0.9–1.9)    | -62.2% (-74 to -43.8%)   |
|                                            | Subarachnoid haemorrhage                | 33.1% (29.6–37%)   | 8.9 (6.1–12.7)      | -54.5% (-74 to -25.3%)   | 27.5% (24.1–31.3%) | 0.2 (0.1–0.3)    | -66.6% (-84.5 to -34.2%) |
|                                            | Neurological disorders*                 | 8% (3–16.5%)       | 106.3 (37.7–253.9)  | 21.7% (-1.5 to 64.9%)    | 16.7% (6.2–26.4%)  | 6.1 (0.9–17.8)   | 22.3% (-8.5 to 95.4%)    |

**Table S16** Regional and national disabilities and deaths related to neurological conditions attributable to risk factors in North Africa and Middle East countries

| Location<br>Risk factor (alphabetic order) | Cause                                   | DALYs (95% UI)     |                        |                                 | Deaths (95% UI)    |                  |                             |
|--------------------------------------------|-----------------------------------------|--------------------|------------------------|---------------------------------|--------------------|------------------|-----------------------------|
|                                            |                                         | PAF (%)            | Rate per 100,000       | Rate change (%)                 | PAF (%)            | Rate per 100,000 | Rate change (%)             |
|                                            |                                         | 2019               | 2019                   | From 1990 to 2019               | 2019               | 2019             | From 1990 to 2019           |
|                                            | Alzheimer's disease and other dementias | 28.6% (18.5–37.6%) | 113.1 (45–260.3)       | 19.3% (-3.1 to 61.1%)           | 24.9% (15.7–33.3%) | 6.7 (1.5–18.3)   | 20.8% (-7.7 to 83.5%)       |
|                                            | Parkinson's disease                     | -17% (-25.5–9%)    | -11.8 (-19.1–6)        | 8.8% (-22.7 to 55.2%)           | -15% (-22.6–7.9%)  | -0.7 (-1.1–0.3)  | 9.6% (-24.5 to 62.9%)       |
|                                            | Multiple sclerosis                      | 21.4% (16.2–26.9%) | 5 (3.4–7)              | 47% (13.9 to 92.5%)             | 22% (16.4–28.1%)   | 0.1 (0–0.1)      | 27.9% (-19.3 to 97.7%)      |
| <b>Libya</b>                               |                                         |                    |                        |                                 |                    |                  |                             |
| Air pollution                              | Meningitis                              | 0.4% (0.2–0.7%)    | 0.1 (0.1–0.3)          | -91% (-96.9 to -75.8%)          | 0.2% (0.1–0.4%)    | <0.1 (<0.1–<0.1) | -91% (-96.9 to -75.8%)      |
|                                            | Encephalitis                            | 0.4% (0.1–0.9%)    | 0.1 (0–0.1)            | -37.5% (-83.3 to 82.4%)         | 0.2% (0.1–0.5%)    | <0.1 (<0.1–<0.1) | -37.5% (-83.3 to 82.5%)     |
|                                            | Stroke                                  | 27.1% (20.1–33.4%) | 425.7 (287.9–594.2)    | -18.2% (-37.4 to 8.4%)          | 23.8% (17.2–29.6%) | 16.5 (10.8–24)   | -22.3% (-41.6 to 5.6%)      |
|                                            | Ischaemic stroke                        | 26.7% (19.7–33%)   | 299.7 (201.4–419.3)    | 11.5% (-14.3 to 44.7%)          | 23% (16.7–28.9%)   | 12.4 (8–18.4)    | 1.2% (-24.3 to 38.6%)       |
|                                            | Intracerebral haemorrhage               | 28.5% (21.5–35.2%) | 107.7 (68.7–156)       | -49.4% (-63.9 to -28.8%)        | 26.8% (19.7–33%)   | 3.6 (2.3–5.3)    | -54% (-67.5 to -34%)        |
|                                            | Subarachnoid haemorrhage                | 25.5% (18.6–32.2%) | 18.3 (11.4–28)         | -52.5% (-68.1 to -25.2%)        | 25.5% (18.9–31.6%) | 0.5 (0.3–0.9)    | -57.2% (-72 to -30.1%)      |
| Alcohol use                                | Stroke                                  | 0.3% (0–0.5%)      | 4.7 (0.1–7.9)          | 373.1% (-130.7 to 1564.7%)      | 0.2% (0–0.3%)      | 0.1 (0–0.2)      | 439.8% (-1589.2 to 3855.6%) |
|                                            | Ischaemic stroke                        | 0.2% (0–0.3%)      | 1.7 (-0.1–3.3)         | -5465.9% (-14472.5 to 14852.3%) | 0.1% (0–0.2%)      | 0.1 (0–0.1)      | -1568% (-15250.1 to 12346%) |
|                                            | Intracerebral haemorrhage               | 0.8% (0.1–1.2%)    | 3 (0.5–5.2)            | 194.8% (-47.9 to 669.4%)        | 0.7% (0.1–1%)      | 0.1 (0–0.2)      | 179.6% (-54.1 to 651.3%)    |
|                                            | Neurological disorders*                 | 0.1% (0–0.2%)      | 1.6 (0.5–2.9)          | 218% (-16.4 to 732.1%)          | 0.1% (0–0.1%)      | <0.1 (<0.1–<0.1) | 249.8% (3.1 to 594.1%)      |
|                                            | Idiopathic epilepsy                     | 1.1% (0.3–1.7%)    | 1.6 (0.5–2.9)          | 218% (-16.4 to 732.1%)          | 1.3% (0.3–1.9%)    | <0.1 (<0.1–<0.1) | 249.8% (3.1 to 594.1%)      |
| All risk factors                           | Meningitis                              | 2.4% (1.5–4.1%)    | 0.9 (0.5–1.5)          | -89.9% (-95 to -80.2%)          | 1.2% (0.7–2.2%)    | <0.1 (<0.1–<0.1) | -89.9% (-95 to -80.2%)      |
|                                            | Encephalitis                            | 2.5% (1.2–4.7%)    | 0.4 (0.2–0.7)          | -28.7% (-74.1 to 73%)           | 1.4% (0.7–2.7%)    | <0.1 (<0.1–<0.1) | -28.7% (-74.1 to 73%)       |
|                                            | Stroke                                  | 86.3% (82.7–89.9%) | 1355.5 (1061.2–1716.9) | -10.5% (-29.5 to 16.2%)         | 86.3% (81–92%)     | 59.9 (45.4–80.6) | -14% (-33.2 to 14.3%)       |
|                                            | Ischaemic stroke                        | 88.1% (83.9–92.8%) | 989 (770.4–1273.6)     | 18.6% (-7.2 to 51.6%)           | 86.5% (80.2–93.7%) | 46.8 (34.9–64.6) | 9% (-16.8 to 43.4%)         |
|                                            | Intracerebral haemorrhage               | 83.5% (79.1–88%)   | 314.5 (234.5–432.2)    | -45.5% (-60 to -24.8%)          | 86.4% (81.8–90.7%) | 11.5 (8.4–15.8)  | -50.5% (-63.8 to -30.7%)    |
|                                            | Subarachnoid haemorrhage                | 72.5% (63.5–81.3%) | 52 (36.8–75.5)         | -50.1% (-65.4 to -22.6%)        | 80.2% (73.7–86.4%) | 1.6 (1.1–2.4)    | -53.6% (-69.2 to -25.8%)    |
|                                            | Neurological disorders*                 | 12.7% (4.9–25.1%)  | 173.9 (59.9–434)       | 14.4% (-5.7 to 42.5%)           | 29.7% (14.3–45.7%) | 11.4 (2.2–33.3)  | 15.8% (-8.8 to 53.2%)       |
|                                            | Alzheimer's disease and other dementias | 42.6% (27.4–58.9%) | 177 (63.3–436.3)       | 11.9% (-7.7 to 38.5%)           | 40.8% (25.5–57.7%) | 11.7 (2.5–33.6)  | 14.2% (-10.4 to 48.9%)      |
|                                            | Parkinson's disease                     | -8.3% (-12.4–4.4%) | -7 (-11.3–3.5)         | -17.9% (-41.6 to 19.3%)         | -7.1% (-10.8–3.7%) | -0.4 (-0.6–0.2)  | -18.9% (-44.8 to 24.8%)     |
|                                            | Idiopathic epilepsy                     | 1.1% (0.3–1.7%)    | 1.6 (0.5–2.9)          | 218% (-16.4 to 732.1%)          | 1.3% (0.3–1.9%)    | <0.1 (<0.1–<0.1) | 249.8% (3.1 to 594.1%)      |
|                                            | Multiple sclerosis                      | 10.8% (7.3–14.3%)  | 2.3 (1.5–3.2)          | 20.7% (-13.8 to 67%)            | 11.8% (6.6–16.6%)  | <0.1 (<0.1–0.1)  | 23.1% (-32.4 to 102.5%)     |
| Ambient particulate matter pollution       | Meningitis                              | 0.4% (0.2–0.7%)    | 0.1 (0.1–0.3)          | -85.9% (-95.1 to -57.8%)        | 0.2% (0.1–0.4%)    | <0.1 (<0.1–<0.1) | -86% (-95.1 to -57.8%)      |
|                                            | Encephalitis                            | 0.4% (0.1–0.9%)    | 0.1 (0–0.1)            | -2.3% (-73.3 to 192.4%)         | 0.2% (0.1–0.5%)    | <0.1 (<0.1–<0.1) | -2.3% (-73.3 to 192.3%)     |
|                                            | Stroke                                  | 27% (20–33.3%)     | 424.7 (287.5–593.5)    | 19.5% (-11.7 to 73.8%)          | 23.7% (17.2–29.6%) | 16.5 (10.7–23.9) | 13.4% (-17 to 66.3%)        |
|                                            | Ischaemic stroke                        | 26.6% (19.6–32.9%) | 299 (201–418.1)        | 63% (21.5 to 130.8%)            | 22.9% (16.6–28.8%) | 12.4 (8–18.3)    | 47.6% (6.4 to 115.7%)       |



**Table S16** Regional and national disabilities and deaths related to neurological conditions attributable to risk factors in North Africa and Middle East countries

| Location<br>Risk factor (alphabetic order) | Cause                                   | DALYs (95% UI)      |                    |                          | Deaths (95% UI)     |                  |                          |
|--------------------------------------------|-----------------------------------------|---------------------|--------------------|--------------------------|---------------------|------------------|--------------------------|
|                                            |                                         | PAF (%)             | Rate per 100,000   | Rate change (%)          | PAF (%)             | Rate per 100,000 | Rate change (%)          |
|                                            |                                         | 2019                | 2019               | From 1990 to 2019        | 2019                | 2019             | From 1990 to 2019        |
| Behavioural risk factors‡                  | Intracerebral haemorrhage               | 28.5% (21.4–35.1%)  | 107.4 (68.7–155.4) | -26.2% (-47.9 to 13.4%)  | 26.7% (19.7–33%)    | 3.5 (2.3–5.2)    | -33% (-53.3 to 4.9%)     |
|                                            | Subarachnoid haemorrhage                | 25.4% (18.6–32.1%)  | 18.2 (11.4–28)     | -30.3% (-54.8 to 21.2%)  | 25.4% (18.8–31.6%)  | 0.5 (0.3–0.9)    | -37.4% (-60.5 to 13.6%)  |
|                                            | Meningitis                              | 2.4% (1.4–4%)       | 0.9 (0.5–1.5)      | -89.8% (-95 to -80.2%)   | 1.2% (0.7–2.1%)     | <0.1 (<0.1–<0.1) | -89.8% (-95 to -80.2%)   |
|                                            | Encephalitis                            | 2.5% (1.1–4.6%)     | 0.4 (0.2–0.7)      | -27.6% (-73.3 to 77.2%)  | 1.4% (0.6–2.6%)     | <0.1 (<0.1–<0.1) | -27.6% (-73.3 to 77.2%)  |
|                                            | Stroke                                  | 35.1% (29.9–41%)    | 552 (406.9–743.3)  | -9.8% (-30.4 to 18.5%)   | 32.6% (26.7–38.9%)  | 22.7 (15.9–32.1) | -12.7% (-33.4 to 16.9%)  |
|                                            | Ischaemic stroke                        | 36.9% (30.2–43.9%)  | 415 (296.2–568.9)  | 17.9% (-7.8 to 52%)      | 33.8% (26.6–41.2%)  | 18.3 (12.5–26.5) | 8.2% (-17.6 to 43.9%)    |
|                                            | Intracerebral haemorrhage               | 31.2% (25.5–38%)    | 117.7 (80.2–173.3) | -46.8% (-62.3 to -23.8%) | 28.9% (23.3–35.5%)  | 3.8 (2.6–5.7)    | -51.2% (-66 to -30%)     |
|                                            | Subarachnoid haemorrhage                | 26.9% (21–34.1%)    | 19.3 (12.8–30.6)   | -50.2% (-66.8 to -20.1%) | 26.9% (21.2–33.9%)  | 0.6 (0.3–0.9)    | -54.6% (-71.1 to -24%)   |
|                                            | Neurological disorders*                 | 3.7% (1.4–7.6%)     | 50.9 (17.3–123.5)  | -21.9% (-38.1 to 1.3%)   | 7.4% (2.4–12%)      | 2.9 (0.4–8.6)    | -25.7% (-47.1 to 3.8%)   |
|                                            | Alzheimer's disease and other dementias | 13% (8.3–17.5%)     | 54 (20–125.9)      | -24.3% (-40 to -4%)      | 11.2% (6.9–15.3%)   | 3.2 (0.7–8.9)    | -25.6% (-44.5 to 0.5%)   |
| Parkinson's disease                        |                                         | -8.3% (-12.4–-4.4%) | -7 (-11.3–-3.5)    | -17.9% (-41.6 to 19.3%)  | -7.1% (-10.8–-3.7%) | -0.4 (-0.6–0.2)  | -18.9% (-44.8 to 24.8%)  |
|                                            | Idiopathic epilepsy                     | 1.1% (0.3–1.7%)     | 1.6 (0.5–2.9)      | 218% (-16.4 to 732.1%)   | 1.3% (0.3–1.9%)     | <0.1 (<0.1–<0.1) | 249.8% (3.1 to 594.1%)   |
|                                            | Multiple sclerosis                      | 10.8% (7.3–14.3%)   | 2.3 (1.5–3.2)      | 20.7% (-13.8 to 67%)     | 11.8% (6.6–16.6%)   | <0.1 (<0.1–0.1)  | 23.1% (-32.4 to 102.5%)  |
|                                            | Meningitis                              | 2.4% (1.4–4%)       | 0.9 (0.5–1.5)      | -89.8% (-95 to -80.2%)   | 1.2% (0.7–2.1%)     | <0.1 (<0.1–<0.1) | -89.8% (-95 to -80.2%)   |
| Child and maternal malnutrition            | Encephalitis                            | 2.5% (1.1–4.6%)     | 0.4 (0.2–0.7)      | -27.6% (-73.3 to 77.2%)  | 1.4% (0.6–2.6%)     | <0.1 (<0.1–<0.1) | -27.6% (-73.3 to 77.2%)  |
|                                            | Stroke                                  | 3.9% (1.4–6%)       | 61.3 (21.7–99.8)   | -41.5% (-65.9 to -14.7%) | 3% (1.4–6%)         | 2.1 (0.7–3.6)    | -44.2% (-67.7 to -17.1%) |
| Diet high in red meat                      | Ischaemic stroke                        | 3.6% (0.6–5.7%)     | 40.7 (6.4–70.3)    | -15% (-54.2 to 15.3%)    | 2.7% (0.5–4.3%)     | 1.5 (0.2–2.6)    | -21.9% (-54.2 to 9.7%)   |
|                                            | Intracerebral haemorrhage               | 4.7% (0.7–7.6%)     | 17.5 (2.5–32.9)    | -63.3% (-81.5 to -44.4%) | 4.1% (0.6–6.7%)     | 0.5 (0.1–1)      | -66.2% (-82.1 to -49.2%) |
|                                            | Subarachnoid haemorrhage                | 4.3% (0.7–7.3%)     | 3.1 (0.4–5.7)      | -66% (-83.7 to -45%)     | 3.9% (0.6–6.6%)     | 0.1 (0–0.2)      | -69.2% (-84.7 to -48.5%) |
| Diet high in sodium                        | Stroke                                  | 1.9% (0.3–7.5%)     | 30.1 (3.7–121.9)   | -10.4% (-48 to 71%)      | 1.7% (0.3–6.6%)     | 1.2 (0.2–4.9)    | -15.2% (-48.9 to 57.1%)  |
|                                            | Ischaemic stroke                        | 1.8% (0.3–7.2%)     | 20.4 (2.7–83.4)    | 22.9% (-33 to 123.3%)    | 1.5% (0.3–6.1%)     | 0.8 (0.1–3.5)    | 12.8% (-37 to 109.4%)    |
|                                            | Intracerebral haemorrhage               | 2.2% (0.2–8.4%)     | 8.3 (0.8–33.9)     | -42.4% (-67.7 to 13.2%)  | 2.1% (0.3–8%)       | 0.3 (0–1.2)      | -48.5% (-71.6 to -2%)    |
|                                            | Subarachnoid haemorrhage                | 1.9% (0.2–7.3%)     | 1.4 (0.1–5.5)      | -45.9% (-72.6 to 12.3%)  | 1.9% (0.2–7.4%)     | <0.1 (<0.1–0.2)  | -52% (-74.7 to 1.2%)     |
| Diet low in fibre                          | Stroke                                  | 2.8% (0.6–5.7%)     | 44.8 (8.9–95.8)    | 43.6% (8 to 104.1%)      | 2.4% (0.5–4.8%)     | 1.7 (0.4–3.6)    | 32.6% (-3.3 to 93.6%)    |
|                                            | Ischaemic stroke                        | 2.8% (0.6–5.4%)     | 31.2 (6.3–65.7)    | 99.2% (48.8 to 179.7%)   | 2.3% (0.5–4.5%)     | 1.3 (0.3–2.7)    | 72.7% (22.4 to 149.4%)   |
|                                            | Intracerebral haemorrhage               | 3.1% (0.6–6.2%)     | 11.6 (2.2–25.8)    | -11.4% (-37.9 to 34.4%)  | 2.8% (0.6–5.6%)     | 0.4 (0.1–0.8)    | -20.5% (-44.8 to 19.3%)  |
|                                            | Subarachnoid haemorrhage                | 2.9% (0.6–5.8%)     | 2.1 (0.4–4.7)      | -17.5% (-45.2 to 35.1%)  | 2.8% (0.6–5.5%)     | 0.1 (0–0.1)      | -25.1% (-51.5 to 26.5%)  |
| Diet low in fruits                         | Stroke                                  | 4.5% (1.8–7.5%)     | 70.4 (27.9–127)    | -5.8% (-37.7 to 33.5%)   | 3.6% (1.4–6.1%)     | 2.5 (1–4.7)      | -9.6% (-41.4 to 31.1%)   |
|                                            | Ischaemic stroke                        | 3.7% (0.7–7.2%)     | 42.2 (7.6–89.3)    | 47.3% (10.5 to 100.3%)   | 3% (0.6–5.7%)       | 1.6 (0.3–3.4)    | 34.2% (-2.6 to 88.4%)    |
|                                            | Intracerebral haemorrhage               | 6.4% (2.9–12%)      | 24 (10.2–48.5)     | -38.1% (-56.3 to -10.7%) | 5.8% (2.6–10.5%)    | 0.8 (0.3–1.5)    | -42.8% (-59.9 to -16.9%) |
| Subarachnoid haemorrhage                   |                                         | 5.9% (2.6–11.1%)    | 4.2 (1.8–8.6)      | -42.4% (-61.7 to -8.7%)  | 5.6% (2.5–10.4%)    | 0.1 (0–0.2)      | -47% (-66.1 to -13.5%)   |
|                                            | Stroke                                  | 1.9% (0.5–3.5%)     | 30 (7.5–59.1)      | 40.6% (-18 to 156.1%)    | 1.7% (0.5–3.1%)     | 1.2 (0.3–2.3)    | 24.3% (-25.6 to 112.5%)  |
| Diet low in vegetables                     |                                         |                     |                    |                          |                     |                  |                          |

**Table S16** Regional and national disabilities and deaths related to neurological conditions attributable to risk factors in North Africa and Middle East countries

| Location<br>Risk factor (alphabetic order) | Cause                                   | DALYs (95% UI)     |                      |                          | Deaths (95% UI)    |                  |                          |
|--------------------------------------------|-----------------------------------------|--------------------|----------------------|--------------------------|--------------------|------------------|--------------------------|
|                                            |                                         | PAF (%)            | Rate per 100,000     | Rate change (%)          | PAF (%)            | Rate per 100,000 | Rate change (%)          |
|                                            |                                         | 2019               | 2019                 | From 1990 to 2019        | 2019               | 2019             | From 1990 to 2019        |
| Diet low in whole grains                   | Ischaemic stroke                        | 1·8% (0·2–3·6%)    | 20·3 (2·4–41·3)      | 83·7% (14·2 to 201%)     | 1·6% (0·2–3·1%)    | 0·9 (0·1–1·7)    | 56·3% (2·3 to 145·9%)    |
|                                            | Intracerebral haemorrhage               | 2·2% (0·2–6·2%)    | 8·3 (0·7–24)         | -4·8% (-49·1 to 151·4%)  | 2·2% (0·2–6%)      | 0·3 (0–0·8)      | -17·7% (-54·5 to 94·2%)  |
|                                            | Subarachnoid haemorrhage                | 2% (0·2–5·8%)      | 1·4 (0·1–4·4)        | -8·9% (-53·1 to 165·8%)  | 2·1% (0·2–5·8%)    | <0·1 (<0·1–0·1)  | -20·7% (-57·8 to 112·7%) |
|                                            | Stroke                                  | 6% (2·8–8·1%)      | 94·7 (41–139·3)      | 17·2% (-8·7 to 50·9%)    | 5·8% (3–7·5%)      | 4 (1·9–6)        | 6% (-19·3 to 41·8%)      |
|                                            | Ischaemic stroke                        | 8·4% (4–11·2%)     | 94·7 (41–139·3)      | 17·2% (-8·7 to 50·9%)    | 7·4% (3·8–9·6%)    | 4 (1·9–6)        | 6% (-19·3 to 41·8%)      |
| Dietary risks                              | Stroke                                  | 19% (13·9–24·7%)   | 298·4 (201·9–422·4)  | -5·7% (-28·6 to 25·7%)   | 16·8% (12·3–21·7%) | 11·6 (7·9–17·1)  | -9·8% (-32·1 to 20·9%)   |
|                                            | Ischaemic stroke                        | 19·9% (13·8–25·7%) | 223·7 (143·3–313·9)  | 22·9% (-5·5 to 58·9%)    | 17·1% (11·9–22·1%) | 9·2 (5·8–13·5)   | 12·1% (-14·8 to 48·2%)   |
|                                            | Intracerebral haemorrhage               | 16·9% (10·5–24·3%) | 63·7 (36·2–103)      | -43·8% (-60·3 to -19·3%) | 15·7% (9·8–22·8%)  | 2·1 (1·2–3·4)    | -48·2% (-63·6 to -25·6%) |
|                                            | Subarachnoid haemorrhage                | 15·4% (9·5–22·2%)  | 11 (6·1–18·1)        | -47·5% (-65·4 to -16·9%) | 15·1% (9·3–22·1%)  | 0·3 (0·2–0·5)    | -51·8% (-68·9 to -19·3%) |
| Environmental/occupational risk factors§   | Meningitis                              | 0·4% (0·2–0·7%)    | 0·1 (0·1–0·3)        | -91% (-96·9 to -75·8%)   | 0·2% (0·1–0·4%)    | <0·1 (<0·1–<0·1) | -91% (-96·9 to -75·8%)   |
|                                            | Encephalitis                            | 0·4% (0·1–0·9%)    | 0·1 (0–0·1)          | -37·5% (-83·3 to 82·4%)  | 0·2% (0·1–0·5%)    | <0·1 (<0·1–<0·1) | -37·5% (-83·3 to 82·5%)  |
|                                            | Stroke                                  | 32·3% (25·3–38·7%) | 507·8 (354·4–695)    | -20·2% (-38·7 to 5·5%)   | 30·2% (23·7–36·7%) | 21 (14·3–29·4)   | -21·6% (-41·1 to 5·8%)   |
|                                            | Ischaemic stroke                        | 31·9% (24·9–38·4%) | 358·6 (248·4–497)    | 9·9% (-14·6 to 43%)      | 29·5% (23·1–35·8%) | 16 (10·6–22·9)   | 2·2% (-23·2 to 38·6%)    |
| High body-mass index                       | Intracerebral haemorrhage               | 33·8% (26·3–40·3%) | 127·3 (84·4–180·1)   | -50·9% (-65 to -30·8%)   | 33% (25·9–39·7%)   | 4·4 (2·9–6·3)    | -54·5% (-67·5 to -35·5%) |
|                                            | Subarachnoid haemorrhage                | 30·4% (23·5–37·3%) | 21·8 (14·1–33·2)     | -56·9% (-70·3 to -31·8%) | 31·6% (24·7–38·3%) | 0·6 (0·4–1)      | -58·3% (-72·4 to -32·5%) |
|                                            | Stroke                                  | 38·5% (27·8–48%)   | 605·3 (392·5–858·3)  | 3·4% (-20·6 to 38·1%)    | 26·9% (18·1–35·6%) | 18·7 (11·2–28·2) | 1·4% (-25·3 to 40·9%)    |
|                                            | Ischaemic stroke                        | 33·4% (23·1–43·1%) | 375 (236·3–545·2)    | 60·9% (24·2 to 115·4%)   | 22·6% (14·3–31·3%) | 12·3 (7–19·3)    | 52·5% (12·6 to 116·3%)   |
|                                            | Intracerebral haemorrhage               | 52·1% (39·7–62·9%) | 196·3 (130·3–275·8)  | -33·6% (-52·2 to -4%)    | 42% (30·3–53·2%)   | 5·6 (3·6–8·1)    | -37% (-55·7 to -6·7%)    |
|                                            | Subarachnoid haemorrhage                | 47·5% (35·1–59·4%) | 34·1 (21·9–50·6)     | -40% (-59·5 to -5%)      | 40·4% (27·9–52·8%) | 0·8 (0·5–1·3)    | -44·9% (-64·8 to -7·9%)  |
|                                            | Neurological disorders*                 | 6·4% (1·9–14·3%)   | 87·3 (23·8–223·1)    | 30·5% (6·2 to 71·5%)     | 15·2% (5·7–27·9%)  | 5·8 (1–16·8)     | 32·9% (2·2 to 84·4%)     |
| High fasting plasma glucose                | Alzheimer's disease and other dementias | 21% (9·4–36·2%)    | 87·3 (23·8–223·1)    | 30·5% (6·2 to 71·5%)     | 20·2% (8·9–35%)    | 5·8 (1–16·8)     | 32·9% (2·2 to 84·4%)     |
|                                            | Stroke                                  | 32% (20·1–51·7%)   | 502·5 (284·9–866·2)  | 21·6% (-9·8 to 69·8%)    | 33·3% (18·8–61·2%) | 23·1 (12·2–44·4) | 6·7% (-20·7 to 49·6%)    |
|                                            | Ischaemic stroke                        | 34·1% (17·9–61·4%) | 382·7 (195·8–732·5)  | 49% (9·4 to 114·4%)      | 33·9% (16·3–68·4%) | 18·3 (7·9–38·7)  | 28·7% (-5 to 83·3%)      |
|                                            | Intracerebral haemorrhage               | 27·6% (17·3–39·9%) | 104 (57·9–163·5)     | -23·1% (-47·2 to 16·2%)  | 31·5% (19·6–46·8%) | 4·2 (2·3–6·9)    | -35·2% (-54·4 to -2%)    |
|                                            | Subarachnoid haemorrhage                | 22% (13·5–33·4%)   | 15·8 (8·6–26·3)      | -25·2% (-53·5 to 29·7%)  | 28·6% (18·1–43·5%) | 0·6 (0·3–1)      | -37·9% (-60·9 to 10·7%)  |
|                                            | Neurological disorders*                 | 5% (0·9–13·4%)     | 67·7 (12·3–213·8)    | 60·6% (35·8 to 100·8%)   | 12·3% (2·8–26·9%)  | 4·7 (0·6–16·1)   | 60·1% (29·4 to 111·2%)   |
| High LDL cholesterol                       | Alzheimer's disease and other dementias | 16·3% (4·1–33%)    | 67·7 (12·3–213·8)    | 60·6% (35·8 to 100·8%)   | 16·3% (4·1–33·2%)  | 4·7 (0·6–16·1)   | 60·1% (29·4 to 111·2%)   |
|                                            | Stroke                                  | 17·6% (11·3–27·8%) | 277·1 (162·6–451·8)  | 43·8% (12·1 to 94·4%)    | 15·7% (7–30·5%)    | 11 (4·5–22·2)    | 28·2% (-1·9 to 83·9%)    |
|                                            | Ischaemic stroke                        | 24·7% (15·7–38·8%) | 277·1 (162·6–451·8)  | 43·8% (12·1 to 94·4%)    | 20·2% (8·7–39·9%)  | 11 (4·5–22·2)    | 28·2% (-1·9 to 83·9%)    |
| High systolic blood pressure               | Stroke                                  | 56·9% (48–64·3%)   | 893·2 (668·4–1153·5) | -9·9% (-30·1 to 17·9%)   | 54% (43·7–63·2%)   | 37·5 (26·4–51·9) | -15·6% (-36·4 to 13·6%)  |
|                                            | Ischaemic stroke                        | 56% (45·4–65%)     | 628·9 (458·2–827·5)  | 21% (-6 to 56·9%)        | 52% (40–63·4%)     | 28·2 (19·1–40·3) | 9·3% (-18·7 to 48·2%)    |

**Table S16** Regional and national disabilities and deaths related to neurological conditions attributable to risk factors in North Africa and Middle East countries

| Location<br>Risk factor (alphabetic order) |                           | DALYs (95% UI)     |                      |                           | Deaths (95% UI)    |                  |                           |
|--------------------------------------------|---------------------------|--------------------|----------------------|---------------------------|--------------------|------------------|---------------------------|
|                                            |                           | PAF (%)            | Rate per 100,000     | Rate change (%)           | PAF (%)            | Rate per 100,000 | Rate change (%)           |
| Cause                                      |                           | 2019               | 2019                 | From 1990 to 2019         | 2019               | 2019             | From 1990 to 2019         |
| High temperature                           | Intracerebral haemorrhage | 60.2% (50.9–68.5%) | 226.8 (163.5–313.3)  | -43.6% (-59.3 to -19.9%)  | 61.3% (50–71.4%)   | 8.1 (5.8–11.5)   | -49.7% (-63.7 to -28%)    |
|                                            | Subarachnoid haemorrhage  | 52.3% (42.1–63%)   | 37.5 (25.7–56.1)     | -46.3% (-63.7 to -16.7%)  | 57.4% (46.5–67.4%) | 1.2 (0.8–1.8)    | -52.3% (-68.9 to -22.6%)  |
|                                            | Stroke                    | 1.6% (-0.4–5%)     | 25.1 (-6.1–78.1)     | -4.7% (-177.2 to 223%)    | 1.9% (-0.4–6%)     | 1.3 (-0.3–4)     | 5.1% (-187.6 to 261.2%)   |
|                                            | Ischaemic stroke          | 1.5% (-0.4–4.8%)   | 17.3 (-4.2–53.7)     | 39.8% (-212.2 to 366.3%)  | 1.9% (-0.4–6%)     | 1 (-0.2–3.1)     | 35.4% (-211.9 to 352.5%)  |
| Household air pollution from solid fuels   | Intracerebral haemorrhage | 1.7% (-0.4–5.6%)   | 6.6 (-1.6–20.5)      | -39.7% (-149.5 to 115.9%) | 1.9% (-0.4–6%)     | 0.3 (-0.1–0.8)   | -39.9% (-151.1 to 117.6%) |
|                                            | Subarachnoid haemorrhage  | 1.6% (-0.4–5.2%)   | 1.2 (-0.3–3.9)       | -60.4% (-127.5 to 26.2%)  | 1.9% (-0.4–6%)     | <0.1 (<0.1–0.1)  | -49.5% (-138.4 to 77.5%)  |
|                                            | Meningitis                | 0% (0–0%)          | <0.1 (<0.1–<0.1)     | -99.9% (-100 to -99.7%)   | 0% (0–0%)          | <0.1 (<0.1–<0.1) | -99.9% (-100 to -99.7%)   |
|                                            | Encephalitis              | 0% (0–0%)          | <0.1 (<0.1–<0.1)     | -99.5% (-99.9 to -98.1%)  | 0% (0–0%)          | <0.1 (<0.1–<0.1) | -99.5% (-99.9 to -98.1%)  |
|                                            | Stroke                    | 0.1% (0–0.2%)      | 1 (0.3–2.6)          | -99.4% (-99.8 to -98.4%)  | 0.1% (0–0.1%)      | <0.1 (<0.1–0.1)  | -99.4% (-99.8 to -98.5%)  |
|                                            | Ischaemic stroke          | 0.1% (0–0.2%)      | 0.7 (0.2–1.8)        | -99.2% (-99.7 to -97.8%)  | 0.1% (0–0.1%)      | <0.1 (<0.1–0.1)  | -99.2% (-99.8 to -98%)    |
|                                            | Intracerebral haemorrhage | 0.1% (0–0.2%)      | 0.3 (0.1–0.6)        | -99.6% (-99.9 to -99%)    | 0.1% (0–0.2%)      | <0.1 (<0.1–<0.1) | -99.7% (-99.9 to -99.1%)  |
| Kidney dysfunction                         | Subarachnoid haemorrhage  | 0.1% (0–0.2%)      | <0.1 (<0.1–0.1)      | -99.6% (-99.9 to -99%)    | 0.1% (0–0.2%)      | <0.1 (<0.1–<0.1) | -99.7% (-99.9 to -99.1%)  |
|                                            | Stroke                    | 11.4% (9–13.6%)    | 179.3 (125–238.2)    | 24.2% (-4.8 to 62.4%)     | 11.1% (7.5–14.4%)  | 7.7 (4.7–11)     | 18.2% (-12.7 to 59.8%)    |
|                                            | Ischaemic stroke          | 12.9% (9.7–16%)    | 145 (98.5–195.9)     | 56.6% (20.5 to 103.6%)    | 11.5% (7.1–15.7%)  | 6.2 (3.5–9.4)    | 47% (7.2 to 100%)         |
| Lead exposure                              | Intracerebral haemorrhage | 9.1% (7.4–11%)     | 34.4 (24.4–48.1)     | -33.7% (-51.5 to -8.5%)   | 11.2% (8.6–13.7%)  | 1.5 (1–2.1)      | -35.3% (-52.4 to -10.1%)  |
|                                            | Stroke                    | 2.2% (0.8–4%)      | 35.3 (11.2–68.2)     | -48.3% (-67.9 to -29.9%)  | 2.7% (1.1–4.5%)    | 1.9 (0.7–3.4)    | -39.2% (-59.5 to -17.7%)  |
|                                            | Ischaemic stroke          | 2.4% (0.8–4.2%)    | 26.8 (8.7–50.6)      | -23.9% (-52.8 to 3%)      | 2.7% (1.1–4.6%)    | 1.5 (0.6–2.7)    | -15.9% (-42.3 to 12.9%)   |
| Low birth weight                           | Intracerebral haemorrhage | 2% (0.5–4%)        | 7.4 (1.8–15.9)       | -74% (-86.4 to -60.8%)    | 2.6% (0.9–4.8%)    | 0.4 (0.1–0.7)    | -69.5% (-81.8 to -55.4%)  |
|                                            | Subarachnoid haemorrhage  | 1.5% (0.4–3.3%)    | 1.1 (0.3–2.5)        | -76.9% (-88.3 to -62.2%)  | 2.4% (0.8–4.4%)    | <0.1 (<0.1–0.1)  | -71.3% (-83 to -53.6%)    |
|                                            | Meningitis                | 2.2% (1.3–3.7%)    | 0.8 (0.4–1.4)        | -89.9% (-95.1 to -80.2%)  | 1.1% (0.6–1.9%)    | <0.1 (<0.1–<0.1) | -89.9% (-95.1 to -80.2%)  |
| Low birth weight and short gestation       | Encephalitis              | 2.3% (1.4–2%)      | 0.4 (0.2–0.7)        | -28.7% (-74.3 to 76.3%)   | 1.3% (0.6–2.4%)    | <0.1 (<0.1–<0.1) | -28.7% (-74.3 to 76.3%)   |
|                                            | Meningitis                | 2.4% (1.4–4%)      | 0.9 (0.5–1.5)        | -89.8% (-95 to -80.2%)    | 1.2% (0.7–2.1%)    | <0.1 (<0.1–<0.1) | -89.8% (-95 to -80.2%)    |
| Low physical activity                      | Encephalitis              | 2.5% (1.1–4.6%)    | 0.4 (0.2–0.7)        | -27.6% (-73.3 to 77.2%)   | 1.4% (0.6–2.6%)    | <0.1 (<0.1–<0.1) | -27.6% (-73.3 to 77.2%)   |
|                                            | Stroke                    | 5.7% (1.2–12.7%)   | 89.1 (17.7–202.7)    | 19.4% (-7.3 to 53.5%)     | 7.3% (1.7–14.9%)   | 5.1 (1.2–10.9)   | 8.8% (-16.8 to 45%)       |
| Low temperature                            | Ischaemic stroke          | 8% (1.7–17.6%)     | 89.1 (17.7–202.7)    | 19.4% (-7.3 to 53.5%)     | 9.4% (2.2–19%)     | 5.1 (1.2–10.9)   | 8.8% (-16.8 to 45%)       |
|                                            | Stroke                    | 3.4% (-0.7–7.9%)   | 54.2 (-10–126.5)     | -23.6% (-70.7 to 25.9%)   | 4.1% (-0.8–9.5%)   | 2.8 (-0.5–6.6)   | -15.9% (-68.1 to 40.8%)   |
| Metabolic risk factors†                    | Ischaemic stroke          | 3.3% (-0.7–7.7%)   | 37.4 (-7.1–87.9)     | 11.9% (-58.7 to 84.5%)    | 4.1% (-0.8–9.5%)   | 2.2 (-0.4–5.1)   | 8.3% (-59.1 to 80.2%)     |
|                                            | Intracerebral haemorrhage | 3.8% (-0.7–8.7%)   | 14.2 (-2.5–33.6)     | -51.5% (-81.4 to -18.8%)  | 4.1% (-0.8–9.5%)   | 0.5 (-0.1–1.3)   | -51.9% (-81.9 to -18.7%)  |
|                                            | Subarachnoid haemorrhage  | 3.5% (-0.7–8.2%)   | 2.6 (-0.5–6.3)       | -68.9% (-88.5 to -36.2%)  | 4.1% (-0.8–9.5%)   | 0.1 (0–0.2)      | -60.1% (-83.6 to -21.7%)  |
|                                            | Stroke                    | 77.2% (70.3–83.6%) | 1212 (935.5–1569.1)  | -5.9% (-25.8 to 22.1%)    | 75.1% (65.4–85.8%) | 52.2 (38.8–70.6) | -10.9% (-31.4 to 17.7%)   |
|                                            | Ischaemic stroke          | 78.5% (70.3–87%)   | 881.1 (670.1–1145.3) | 24% (-3.1 to 59.9%)       | 74.7% (62.8–87.8%) | 40.4 (28.8–56.4) | 13.1% (-14.4 to 50.8%)    |
|                                            | Intracerebral haemorrhage | 75.6% (69.3–81.6%) | 284.9 (210.4–393.2)  | -42.3% (-57.6 to -19.4%)  | 77.4% (69.9–84.4%) | 10.3 (7.5–14.4)  | -48.3% (-62.4 to -26.9%)  |
|                                            | Subarachnoid haemorrhage  | 64.3% (53.9–74.4%) | 46.1 (32.3–67.4)     | -45.4% (-63 to -14.9%)    | 70.3% (61–78.6%)   | 1.4 (1–2.1)      | -51.2% (-68 to -20.6%)    |

**Table S16** Regional and national disabilities and deaths related to neurological conditions attributable to risk factors in North Africa and Middle East countries

| Location<br>Risk factor (alphabetic order) | Cause                                   | DALYs (95% UI)     |                     |                          | Deaths (95% UI)    |                  |                          |
|--------------------------------------------|-----------------------------------------|--------------------|---------------------|--------------------------|--------------------|------------------|--------------------------|
|                                            |                                         | PAF (%)            | Rate per 100,000    | Rate change (%)          | PAF (%)            | Rate per 100,000 | Rate change (%)          |
|                                            |                                         | 2019               | 2019                | From 1990 to 2019        | 2019               | 2019             | From 1990 to 2019        |
|                                            | Neurological disorders*                 | 10.3% (3.5–21.9%)  | 140.7 (41.9–351.9)  | 37.2% (13.7 to 72.3%)    | 25% (10.6–41.8%)   | 9.5 (1.7–27.9)   | 38.9% (8.6 to 84.2%)     |
|                                            | Alzheimer's disease and other dementias | 33.9% (17.2–52.7%) | 140.7 (41.9–351.9)  | 37.2% (13.7 to 72.3%)    | 33.2% (16.2–52%)   | 9.5 (1.7–27.9)   | 38.9% (8.6 to 84.2%)     |
| Non-optimal temperature                    | Stroke                                  | 5% (1.8–8.7%)      | 78.5 (27.3–143.3)   | -18.7% (-49.3 to 19.7%)  | 5.9% (2.2–10.3%)   | 4.1 (1.5–7.5)    | -10.4% (-42.6 to 29.3%)  |
|                                            | Ischaemic stroke                        | 4.8% (1.8–8.4%)    | 54.2 (18.7–99.8)    | 19.2% (-27.3 to 71.5%)   | 5.9% (2.2–10.3%)   | 3.2 (1.1–5.9)    | 15.5% (-27 to 62.3%)     |
|                                            | Intracerebral haemorrhage               | 5.5% (2–9.4%)      | 20.6 (7–38)         | -48.4% (-68.2 to -21.3%) | 5.9% (2.2–10.3%)   | 0.8 (0.3–1.4)    | -48.7% (-68.4 to -20.7%) |
|                                            | Subarachnoid haemorrhage                | 5.1% (1.9–9%)      | 3.7 (1.3–7.2)       | -66.7% (-81.7 to -37%)   | 5.9% (2.2–10.3%)   | 0.1 (0–0.2)      | -57.3% (-75.3 to -25.3%) |
| Other environmental risks                  | Stroke                                  | 2.2% (0.8–4%)      | 35.3 (11.2–68.2)    | -48.3% (-67.9 to -29.9%) | 2.7% (1.1–4.5%)    | 1.9 (0.7–3.4)    | -39.2% (-59.5 to -17.7%) |
|                                            | Ischaemic stroke                        | 2.4% (0.8–4.2%)    | 26.8 (8.7–50.6)     | -23.9% (-52.8 to 3%)     | 2.7% (1.1–4.6%)    | 1.5 (0.6–2.7)    | -15.9% (-42.3 to 12.9%)  |
|                                            | Intracerebral haemorrhage               | 2% (0.5–4%)        | 7.4 (1.8–15.9)      | -74% (-86.4 to -60.8%)   | 2.6% (0.9–4.8%)    | 0.4 (0.1–0.7)    | -69.5% (-81.8 to -55.4%) |
|                                            | Subarachnoid haemorrhage                | 1.5% (0.4–3.3%)    | 1.1 (0.3–2.5)       | -76.9% (-88.3 to -62.2%) | 2.4% (0.8–4.4%)    | <0.1 (<0.1–0.1)  | -71.3% (-83 to -53.6%)   |
| Particulate matter pollution               | Meningitis                              | 0.4% (0.2–0.7%)    | 0.1 (0.1–0.3)       | -91% (-96.9 to -75.8%)   | 0.2% (0.1–0.4%)    | <0.1 (<0.1–<0.1) | -91% (-96.9 to -75.8%)   |
|                                            | Encephalitis                            | 0.4% (0.1–0.9%)    | 0.1 (0–0.1)         | -37.5% (-83.3 to 82.4%)  | 0.2% (0.1–0.5%)    | <0.1 (<0.1–<0.1) | -37.5% (-83.3 to 82.5%)  |
|                                            | Stroke                                  | 27.1% (20.1–33.4%) | 425.7 (287.9–594.2) | -18.2% (-37.4 to 8.4%)   | 23.8% (17.2–29.6%) | 16.5 (10.8–24)   | -22.3% (-41.6 to 5.6%)   |
|                                            | Ischaemic stroke                        | 26.7% (19.7–33%)   | 299.7 (201.4–419.3) | 11.5% (-14.3 to 44.7%)   | 23% (16.7–28.9%)   | 12.4 (8–18.4)    | 1.2% (-24.3 to 38.6%)    |
|                                            | Intracerebral haemorrhage               | 28.5% (21.5–35.2%) | 107.7 (68.7–156)    | -49.4% (-63.9 to -28.8%) | 26.8% (19.7–33%)   | 3.6 (2.3–5.3)    | -54% (-67.5 to -34%)     |
|                                            | Subarachnoid haemorrhage                | 25.5% (18.6–32.2%) | 18.3 (11.4–28)      | -52.5% (-68.1 to -25.2%) | 25.5% (18.9–31.6%) | 0.5 (0.3–0.9)    | -57.2% (-72 to -30.1%)   |
| Secondhand smoke                           | Stroke                                  | 5.1% (3.8–6.3%)    | 79.4 (53.5–110.4)   | -6.4% (-28.5 to 25.3%)   | 4.3% (3.3–5.3%)    | 3 (2–4.3)        | -9.7% (-31 to 23%)       |
|                                            | Ischaemic stroke                        | 4.8% (3.6–5.9%)    | 53.5 (36.6–74.1)    | 34.2% (1.8 to 75.9%)     | 4% (3–5%)          | 2.2 (1.4–3.1)    | 21.3% (-9.3 to 63.5%)    |
|                                            | Intracerebral haemorrhage               | 5.9% (4.4–7.5%)    | 22.1 (14.4–32.7)    | -41.6% (-58.4 to -15.1%) | 5.3% (4–6.7%)      | 0.7 (0.5–1)      | -45.7% (-61.1 to -21.4%) |
|                                            | Subarachnoid haemorrhage                | 5.2% (3.7–7%)      | 3.8 (2.3–5.7)       | -46.8% (-65 to -13.7%)   | 5.2% (3.8–6.7%)    | 0.1 (0.1–0.2)    | -50.5% (-67.9 to -17%)   |
| Short gestation                            | Meningitis                              | 1.7% (1–2.9%)      | 0.6 (0.4–1.1)       | -88.1% (-94 to -77%)     | 0.9% (0.5–1.5%)    | <0.1 (<0.1–<0.1) | -88.1% (-94 to -77%)     |
|                                            | Encephalitis                            | 1.8% (0.8–3.3%)    | 0.3 (0.2–0.5)       | -15.9% (-69.2 to 102.6%) | 1% (0.5–1.9%)      | <0.1 (<0.1–<0.1) | -15.9% (-69.2 to 102.6%) |
| Smoking                                    | Stroke                                  | 11.2% (9.4–13%)    | 175.8 (124.8–246.9) | -25.4% (-45.4 to 3.6%)   | 8.9% (7.3–10.7%)   | 6.2 (4.4–8.9)    | -29.2% (-50 to 0.4%)     |
|                                            | Ischaemic stroke                        | 10.8% (9.2–12.6%)  | 121.4 (87.3–172)    | 3.6% (-25.5 to 42%)      | 8.3% (6.9–9.9%)    | 4.5 (3.1–6.6)    | -4.4% (-34.5 to 37.8%)   |
|                                            | Intracerebral haemorrhage               | 12.4% (9.3–15.6%)  | 47.1 (29.5–72.6)    | -53.9% (-70.4 to -30.5%) | 11.1% (8.1–14.1%)  | 1.5 (0.9–2.3)    | -58.1% (-73.3 to -35.2%) |
|                                            | Subarachnoid haemorrhage                | 10.1% (7.6–13.7%)  | 7.3 (4.7–12.7)      | -55.7% (-73.2 to -18.8%) | 10% (7.2–13.4%)    | 0.2 (0.1–0.4)    | -60.2% (-77.5 to -22.8%) |
|                                            | Neurological disorders*                 | 3.6% (1.2–7.5%)    | 49.3 (15.4–122.1)   | -23.8% (-40.5 to -1.8%)  | 7.3% (2.3–11.9%)   | 2.9 (0.4–8.6)    | -26% (-47.5 to 3.1%)     |
|                                            | Alzheimer's disease and other dementias | 13% (8.3–17.5%)    | 54 (20–125.9)       | -24.3% (-40 to -4%)      | 11.2% (6.9–15.3%)  | 3.2 (0.7–8.9)    | -25.6% (-44.5 to 0.5%)   |
|                                            | Parkinson's disease                     | -8.3% (-12.4–4.4%) | -7 (-11.3–3.5)      | -17.9% (-41.6 to 19.3%)  | -7.1% (-10.8–3.7%) | -0.4 (-0.6–0.2)  | -18.9% (-44.8 to 24.8%)  |
|                                            | Multiple sclerosis                      | 10.8% (7.3–14.3%)  | 2.3 (1.5–3.2)       | 20.7% (-13.8 to 67%)     | 11.8% (6.6–16.6%)  | <0.1 (<0.1–0.1)  | 23.1% (-32.4 to 102.5%)  |
| Tobacco                                    | Stroke                                  | 15.7% (13.7–18%)   | 246.5 (181–335.4)   | -20.3% (-39.9 to 8.1%)   | 12.8% (11–14.8%)   | 8.9 (6.4–12.4)   | -23.8% (-44 to 5.7%)     |

**Table S16** Regional and national disabilities and deaths related to neurological conditions attributable to risk factors in North Africa and Middle East countries

| Location<br>Risk factor (alphabetic order) | Cause                                   | DALYs (95% UI)      |                        |                           | Deaths (95% UI)     |                    |                             |
|--------------------------------------------|-----------------------------------------|---------------------|------------------------|---------------------------|---------------------|--------------------|-----------------------------|
|                                            |                                         | PAF (%)             | Rate per 100,000       | Rate change (%)           | PAF (%)             | Rate per 100,000   | Rate change (%)             |
|                                            |                                         | 2019                | 2019                   | From 1990 to 2019         | 2019                | 2019               | From 1990 to 2019           |
|                                            | Ischaemic stroke                        | 15% (13.1–17.1%)    | 169.1 (122.8–230.4)    | 11.4% (-17.7 to 49.2%)    | 12% (10.2–13.8%)    | 6.5 (4.6–9.3)      | 2.6% (-25.8 to 42%)         |
|                                            | Intracerebral haemorrhage               | 17.7% (14.6–21%)    | 66.7 (45–97.8)         | -50.5% (-66 to -27.1%)    | 15.8% (12.9–19%)    | 2.1 (1.4–3.2)      | -54.7% (-69.2 to -33%)      |
|                                            | Subarachnoid haemorrhage                | 14.8% (12–18.5%)    | 10.7 (7.1–17.3)        | -52.9% (-69.9 to -21.6%)  | 14.7% (11.9–18.4%)  | 0.3 (0.2–0.5)      | -57.3% (-74.4 to -24.8%)    |
|                                            | Neurological disorders*                 | 3.6% (1.2–7.5%)     | 49.3 (15.4–122.1)      | -23.8% (-40.5 to -1.8%)   | 7.3% (2.3–11.9%)    | 2.9 (0.4–8.6)      | -26% (-47.5 to 3.1%)        |
|                                            | Alzheimer's disease and other dementias | 13% (8.3–17.5%)     | 54 (20–125.9)          | -24.3% (-40 to -4%)       | 11.2% (6.9–15.3%)   | 3.2 (0.7–8.9)      | -25.6% (-44.5 to 0.5%)      |
|                                            | Parkinson's disease                     | -8.3% (-12.4–-4.4%) | -7 (-11.3–-3.5)        | -17.9% (-41.6 to 19.3%)   | -7.1% (-10.8–-3.7%) | -0.4 (-0.6–-0.2)   | -18.9% (-44.8 to 24.8%)     |
|                                            | Multiple sclerosis                      | 10.8% (7.3–14.3%)   | 2.3 (1.5–3.2)          | 20.7% (-13.8 to 67%)      | 11.8% (6.6–16.6%)   | <0.1 (<0.1–0.1)    | 23.1% (-32.4 to 102.5%)     |
| <b>Morocco</b>                             |                                         |                     |                        |                           |                     |                    |                             |
| Air pollution                              | Meningitis                              | 1.6% (0.7–3.1%)     | 1.1 (0.4–2.3)          | -85.6% (-95.6 to -54.2%)  | 0.9% (0.4–1.9%)     | <0.1 (<0.1–<0.1)   | -85.6% (-95.6 to -54.2%)    |
|                                            | Encephalitis                            | 0.9% (0.3–2.1%)     | 0.2 (0.1–0.5)          | -7.1% (-70.9 to 190%)     | 0.6% (0.1–1.2%)     | <0.1 (<0.1–<0.1)   | -7.1% (-70.9 to 190%)       |
|                                            | Stroke                                  | 26.3% (22–30.4%)    | 593.3 (444.8–767.1)    | -17.8% (-37.4 to 4.6%)    | 22.6% (18.6–26.4%)  | 26.3 (19.7–33.9)   | -14.6% (-35 to 8.1%)        |
|                                            | Ischaemic stroke                        | 25.3% (21.1–29.4%)  | 405.3 (307.6–519.3)    | 20.7% (-8.7 to 51.1%)     | 21.7% (17.8–25.4%)  | 19.3 (14.4–25.1)   | 19.1% (-11.4 to 50.6%)      |
|                                            | Intracerebral haemorrhage               | 28.7% (24–33.1%)    | 159.3 (114.3–213.7)    | -50.4% (-64.6 to -30.2%)  | 25.5% (21.2–29.6%)  | 6 (4.4–7.9)        | -51.1% (-64.9 to -31.8%)    |
|                                            | Subarachnoid haemorrhage                | 28.5% (23.8–33.2%)  | 28.7 (18.9–42.7)       | -55.7% (-72.1 to -22.6%)  | 25.3% (20.7–29.9%)  | 1 (0.6–1.5)        | -56.7% (-72.5 to -20.3%)    |
| Alcohol use                                | Stroke                                  | 0.3% (0–0.6%)       | 6 (0–12.9)             | -73.6% (-100.1 to -49.1%) | 0.1% (-0.1–0.3%)    | 0.2 (-0.1–0.4)     | -78.2% (-119.6 to -49.5%)   |
|                                            | Ischaemic stroke                        | 0% (-0.2–0.3%)      | 0.3 (-3.8–4.6)         | -88% (-1002.1 to 790.8%)  | 0% (-0.2–0.2%)      | 0 (-0.2–0.2)       | -132.3% (-1206.1 to 930.1%) |
|                                            | Intracerebral haemorrhage               | 1% (0.3–1.8%)       | 5.7 (1.8–10.9)         | -71.7% (-87.3 to -52.6%)  | 0.7% (0.2–1.3%)     | 0.2 (0–0.3)        | -72.6% (-88.9 to -52.3%)    |
|                                            | Neurological disorders*                 | 0.2% (0–0.3%)       | 2 (0.6–4.6)            | -41.1% (-80.8 to 45.7%)   | 0.1% (0–0.2%)       | <0.1 (<0.1–<0.1)   | -49.3% (-71.2 to -20.2%)    |
|                                            | Idiopathic epilepsy                     | 1.5% (0.8–2.4%)     | 2 (0.6–4.6)            | -41.1% (-80.8 to 45.7%)   | 1.6% (0.7–2.7%)     | <0.1 (<0.1–<0.1)   | -49.3% (-71.2 to -20.2%)    |
| All risk factors                           | Meningitis                              | 10.2% (5.4–17.2%)   | 7 (3.3–13)             | -86.8% (-94.7 to -68%)    | 5.8% (3–10.3%)      | 0.1 (0–0.1)        | -86.8% (-94.7 to -68%)      |
|                                            | Encephalitis                            | 5.7% (2–10.9%)      | 1.4 (0.6–2.5)          | -19.3% (-65.8 to 82.2%)   | 3.4% (1.1–6.5%)     | <0.1 (<0.1–<0.1)   | -19.3% (-65.8 to 82.2%)     |
|                                            | Stroke                                  | 88.4% (84.6–92.2%)  | 1995.8 (1606.4–2406.6) | -14.1% (-32 to 6.4%)      | 86.5% (81.3–92.3%)  | 100.7 (79.6–122.9) | -9.6% (-27.7 to 11.8%)      |
|                                            | Ischaemic stroke                        | 88.8% (84–93.8%)    | 1424.1 (1149.7–1720.8) | 22.2% (-4.4 to 48.1%)     | 86.5% (79.6–94%)    | 76.9 (60.6–95.6)   | 22.2% (-5.8 to 48.8%)       |
|                                            | Intracerebral haemorrhage               | 87.9% (83.9–91.4%)  | 487.1 (373.9–621.4)    | -49.7% (-63.3 to -30.8%)  | 87% (81.7–91.9%)    | 20.5 (15.9–25.6)   | -50.1% (-63.1 to -31.7%)    |
|                                            | Subarachnoid haemorrhage                | 84.3% (79.3–88.3%)  | 84.6 (59.6–123.3)      | -55.4% (-71.1 to -23.1%)  | 84.4% (78–90%)      | 3.3 (2.3–4.8)      | -55.5% (-71.3 to -18.7%)    |
|                                            | Neurological disorders*                 | 9.8% (3.7–20.3%)    | 131.4 (44.8–341.5)     | 25.7% (2.6 to 49.4%)      | 22.7% (9.8–37.4%)   | 8.2 (1.4–26)       | 33.3% (6.7 to 65.8%)        |
|                                            | Alzheimer's disease and other dementias | 34.4% (20.9–49.7%)  | 133 (45.8–340.7)       | 26.7% (3.7 to 50.4%)      | 33.1% (19.7–48.7%)  | 8.4 (1.7–26.3)     | 32.3% (5.7 to 61.6%)        |
|                                            | Parkinson's disease                     | -5.2% (-8–-2.6%)    | -5 (-7.8–-2.4)         | -7.9% (-33.3 to 24.8%)    | -4.6% (-7.2–-2.2%)  | -0.3 (-0.4–-0.1)   | -1.8% (-30.7 to 36.2%)      |
|                                            | Idiopathic epilepsy                     | 1.5% (0.8–2.4%)     | 2 (0.6–4.6)            | -41.1% (-80.8 to 45.7%)   | 1.6% (0.7–2.7%)     | <0.1 (<0.1–<0.1)   | -49.3% (-71.2 to -20.2%)    |
|                                            | Multiple sclerosis                      | 6.8% (4.9–8.8%)     | 1.4 (0.9–1.9)          | -9.9% (-36.8 to 23.1%)    | 7.1% (4.8–9.8%)     | <0.1 (<0.1–<0.1)   | -9.7% (-48.2 to 38.9%)      |

**Table S16** Regional and national disabilities and deaths related to neurological conditions attributable to risk factors in North Africa and Middle East countries

| Location<br>Risk factor (alphabetic order) |                                         | DALYs (95% UI)     |                        |                          | Deaths (95% UI)    |                        |                          |
|--------------------------------------------|-----------------------------------------|--------------------|------------------------|--------------------------|--------------------|------------------------|--------------------------|
|                                            |                                         | PAF (%)            | Rate per 100,000       | Rate change (%)          | PAF (%)            | Rate per 100,000       | Rate change (%)          |
|                                            | Cause                                   | 2019               | 2019                   | From 1990 to 2019        | 2019               | 2019                   | From 1990 to 2019        |
| Ambient particulate matter pollution       | Meningitis                              | 1.5% (0.6–2.9%)    | 1 (0.4–2.2)            | -62.4% (-88.6 to 45.9%)  | 0.9% (0.3–1.8%)    | <0.1 (<0.1–<0.1)       | -62.4% (-88.6 to 45.9%)  |
|                                            | Encephalitis                            | 0.9% (0.2–1.9%)    | 0.2 (0.1–0.4)          | 143.6% (-31.5 to 922.8%) | 0.5% (0.1–1.2%)    | <0.1 (<0.1–<0.1)       | 143.6% (-31.5 to 922.8%) |
|                                            | Stroke                                  | 24.7% (20.3–29%)   | 557.6 (417.5–724.5)    | 93.7% (24.3 to 264%)     | 21.2% (17.3–25.1%) | 24.7 (18.4–32.2)       | 101.4% (30.5 to 271.6%)  |
|                                            | Ischaemic stroke                        | 23.7% (19.4–28.1%) | 380.9 (286.4–493)      | 185.6% (81.9 to 418.2%)  | 20.4% (16.6–24.2%) | 18.1 (13.5–23.9)       | 182.5% (81.7 to 414.8%)  |
|                                            | Intracerebral haemorrhage               | 27% (22.3–31.6%)   | 149.8 (107.3–201.2)    | 16.1% (-29.5 to 125.9%)  | 24% (19.6–28.2%)   | 5.7 (4.1–7.5)          | 14.4% (-29.8 to 123.1%)  |
|                                            | Subarachnoid haemorrhage                | 26.8% (22–31.5%)   | 26.9 (17.5–40.9)       | 5.5% (-42.5 to 140.5%)   | 23.7% (19.2–28.2%) | 0.9 (0.6–1.4)          | 2.9% (-44.5 to 138.9%)   |
| Behavioural risk factors‡                  | Meningitis                              | 9.8% (5.3–16.6%)   | 6.8 (3.1–12.7)         | -86.8% (-94.8 to -67.4%) | 5.6% (2.8–9.9%)    | 0.1 (0–0.1)            | -86.8% (-94.8 to -67.4%) |
|                                            | Encephalitis                            | 5.4% (2–10.4%)     | 1.3 (0.6–2.4)          | -19.3% (-65.2 to 84.1%)  | 3.3% (1.1–6.2%)    | <0.1 (<0.1–<0.1)       | -19.3% (-65.3 to 84.1%)  |
|                                            | Stroke                                  | 29.4% (24.1–35.1%) | 662.8 (496.7–874.4)    | -27.8% (-44.9 to -8%)    | 27% (21.5–33.2%)   | 31.4 (23.4–41.8)       | -22.1% (-41.1 to -2.4%)  |
|                                            | Ischaemic stroke                        | 31.3% (24.5–38.7%) | 502.6 (369.2–674.2)    | 5.7% (-21.3 to 32.2%)    | 28.9% (21.8–36.6%) | 25.7 (18.6–35.1)       | 7% (-20.3 to 32.7%)      |
|                                            | Intracerebral haemorrhage               | 24.7% (19.7–30.6%) | 137 (96.8–189)         | -63.2% (-74.6 to -47.2%) | 21.2% (16.7–26.6%) | 5 (3.6–7)              | -64.1% (-75.2 to -49.3%) |
|                                            | Subarachnoid haemorrhage                | 23.1% (17.9–28.7%) | 23.2 (14.3–37.1)       | -66.6% (-79.4 to -40.7%) | 19.9% (15–25.5%)   | 0.8 (0.5–1.2)          | -67.7% (-79.8 to -39.7%) |
|                                            | Neurological disorders*                 | 2.6% (0.9–5.5%)    | 34.6 (11.7–87.4)       | -27.7% (-44.6 to -12.9%) | 5.1% (1.3–9%)      | 1.9 (0.2–6.1)          | -22.9% (-50.3 to -3.2%)  |
|                                            | Alzheimer's disease and other dementias | 9.4% (5.6–13.4%)   | 36.2 (13.3–88.2)       | -25.1% (-40.2 to -9.7%)  | 8.4% (4.9–12.3%)   | 2.1 (0.5–6.4)          | -20.5% (-40.6 to 0.5%)   |
|                                            | Parkinson's disease                     | -5.2% (-8–2.6%)    | -5 (-7.8–2.4)          | -7.9% (-33.3 to 24.8%)   | -4.6% (-7.2–2.2%)  | -0.3 (-0.4–0.1)        | -1.8% (-30.7 to 36.2%)   |
|                                            | Idiopathic epilepsy                     | 1.5% (0.8–2.4%)    | 2 (0.6–4.6)            | -41.1% (-80.8 to 45.7%)  | 1.6% (0.7–2.7%)    | <0.1 (<0.1–<0.1)       | -49.3% (-71.2 to -20.2%) |
| Multiple sclerosis                         | 6.8% (4.9–8.8%)                         | 1.4 (0.9–1.9)      | -9.9% (-36.8 to 23.1%) | 7.1% (4.8–9.8%)          | <0.1 (<0.1–<0.1)   | -9.7% (-48.2 to 38.9%) |                          |
| Child and maternal malnutrition            | Meningitis                              | 9.8% (5.3–16.6%)   | 6.8 (3.1–12.7)         | -86.8% (-94.8 to -67.4%) | 5.6% (2.8–9.9%)    | 0.1 (0–0.1)            | -86.8% (-94.8 to -67.4%) |
|                                            | Encephalitis                            | 5.4% (2–10.4%)     | 1.3 (0.6–2.4)          | -19.3% (-65.2 to 84.1%)  | 3.3% (1.1–6.2%)    | <0.1 (<0.1–<0.1)       | -19.3% (-65.3 to 84.1%)  |
| Diet high in red meat                      | Stroke                                  | 4% (1.5–6%)        | 90.8 (33.1–143.8)      | -0.1% (-35.1 to 59.6%)   | 3.1% (1.1–4.7%)    | 3.6 (1.3–5.6)          | 2.4% (-33.2 to 59.9%)    |
|                                            | Ischaemic stroke                        | 3.6% (0.6–5.5%)    | 57.7 (9.5–95.8)        | 55.8% (15.1 to 128.3%)   | 2.7% (0.5–4.2%)    | 2.4 (0.4–4.1)          | 53.1% (12.7 to 119.9%)   |
|                                            | Intracerebral haemorrhage               | 5% (0.8–8%)        | 27.9 (4.3–49.2)        | -37.4% (-56.7 to 0.9%)   | 4.2% (0.7–6.7%)    | 1 (0.2–1.7)            | -38.2% (-57 to -4.1%)    |
|                                            | Subarachnoid haemorrhage                | 5.2% (0.8–8.3%)    | 5.2 (0.7–9.8)          | -44.1% (-64.1 to 7.5%)   | 4.2% (0.6–6.9%)    | 0.2 (0–0.3)            | -45.4% (-65.1 to 9.9%)   |
| Diet high in sodium                        | Stroke                                  | 1.9% (0.3–7.7%)    | 43.8 (5.7–173.3)       | -20.4% (-55.3 to 47.4%)  | 1.6% (0.3–6.5%)    | 1.9 (0.3–7.7)          | -16.8% (-53.9 to 51.4%)  |
|                                            | Ischaemic stroke                        | 1.8% (0.3–7%)      | 28.9 (4–112.5)         | 19.5% (-38 to 108.1%)    | 1.5% (0.3–6%)      | 1.4 (0.2–5.4)          | 20.1% (-39 to 111.4%)    |
|                                            | Intracerebral haemorrhage               | 2.3% (0.3–9.2%)    | 12.7 (1.4–52.8)        | -51% (-72.2 to -1.3%)    | 2.1% (0.3–8.5%)    | 0.5 (0.1–2)            | -51.3% (-74.1 to -9.8%)  |
|                                            | Subarachnoid haemorrhage                | 2.1% (0.2–8.5%)    | 2.2 (0.2–8.9)          | -55.3% (-79.3 to -2.8%)  | 2% (0.3–7.9%)      | 0.1 (0–0.3)            | -55.8% (-79.9 to 1%)     |
| Diet low in fibre                          | Stroke                                  | 0.3% (0.2–0.5%)    | 6.4 (4.3–10.6)         | -25.7% (-46.2 to -0.6%)  | 0.3% (0.2–0.5%)    | 0.3 (0.2–0.6)          | -29.3% (-54.1 to -0.4%)  |
|                                            | Ischaemic stroke                        | 0.3% (0.2–0.4%)    | 4.5 (3.1–7.3)          | 4.1% (-25.5 to 37.1%)    | 0.3% (0.2–0.5%)    | 0.3 (0.2–0.4)          | -6.8% (-40.6 to 34.1%)   |
|                                            | Intracerebral haemorrhage               | 0.3% (0.2–0.5%)    | 1.6 (1–2.8)            | -55.3% (-69.3 to -35.1%) | 0.3% (0.2–0.5%)    | 0.1 (0–0.1)            | -59.5% (-73.7 to -38.7%) |
|                                            | Subarachnoid haemorrhage                | 0.3% (0.2–0.5%)    | 0.3 (0.2–0.6)          | -59.4% (-74.2 to -25.2%) | 0.3% (0.2–0.5%)    | <0.1 (<0.1–<0.1)       | -62.8% (-78.2 to -25.6%) |
| Diet low in fruits                         | Stroke                                  | 2.4% (1.1–4%)      | 54 (24.6–94.5)         | -67.7% (-81.5 to -46.2%) | 2% (0.9–3.3%)      | 2.3 (1–4)              | -65.6% (-80.6 to -44.4%) |



**Table S16** Regional and national disabilities and deaths related to neurological conditions attributable to risk factors in North Africa and Middle East countries

| Location<br>Risk factor (alphabetic order) | Cause                                   | DALYs (95% UI)     |                      |                          | Deaths (95% UI)    |                  |                          |
|--------------------------------------------|-----------------------------------------|--------------------|----------------------|--------------------------|--------------------|------------------|--------------------------|
|                                            |                                         | PAF (%)            | Rate per 100,000     | Rate change (%)          | PAF (%)            | Rate per 100,000 | Rate change (%)          |
|                                            |                                         | 2019               | 2019                 | From 1990 to 2019        | 2019               | 2019             | From 1990 to 2019        |
| Diet low in vegetables                     | Ischaemic stroke                        | 1.9% (0.4–3.7%)    | 30.2 (6.4–62.2)      | -49.4% (-71.7 to -27.3%) | 1.6% (0.4–3.2%)    | 1.4 (0.3–2.9)    | -46.5% (-69.4 to -23.6%) |
|                                            | Intracerebral haemorrhage               | 3.6% (1.6–6%)      | 19.9 (8.9–35.9)      | -77.6% (-88.2 to -67%)   | 3.1% (1.4–5.2%)    | 0.7 (0.3–1.3)    | -78.1% (-88.2 to -68%)   |
|                                            | Subarachnoid haemorrhage                | 3.9% (1.8–6.6%)    | 3.9 (1.7–7.2)        | -78.8% (-89.4 to -68.2%) | 3.2% (1.5–5.4%)    | 0.1 (0.1–0.2)    | -79.9% (-90.3 to -69.5%) |
|                                            | Stroke                                  | 1.1% (0.3–2.3%)    | 24.9 (6–52.8)        | -73.4% (-90.2 to -56.6%) | 1.1% (0.3–2.1%)    | 1.3 (0.3–2.6)    | -68% (-86.5 to -49.5%)   |
|                                            | Ischaemic stroke                        | 1.1% (0.2–2.3%)    | 17.1 (3.3–37.1)      | -49.4% (-79.4 to 10.9%)  | 1% (0.2–2.1%)      | 0.9 (0.2–1.9)    | -42.3% (-74.4 to 15.1%)  |
|                                            | Intracerebral haemorrhage               | 1.2% (0.2–4%)      | 6.6 (1–22.5)         | -86.7% (-96.3 to -77.1%) | 1.2% (0.2–4%)      | 0.3 (0–1)        | -85.1% (-95.4 to -74.8%) |
| Diet low in whole grains                   | Subarachnoid haemorrhage                | 1.2% (0.2–4%)      | 1.2 (0.2–4.4)        | -88.2% (-97.2 to -79.2%) | 1.2% (0.2–4%)      | <0.1 (<0.1–0.2)  | -86.7% (-96.3 to -77.1%) |
|                                            | Stroke                                  | 6.7% (3.7–8.6%)    | 150.7 (80.8–207.1)   | 17.3% (-9.1 to 42.6%)    | 6.5% (3.9–8.1%)    | 7.5 (4.3–10.4)   | 16.4% (-9.8 to 41.3%)    |
|                                            | Ischaemic stroke                        | 9.4% (5.2–12%)     | 150.7 (80.8–207.1)   | 17.3% (-9.1 to 42.6%)    | 8.5% (5–10.6%)     | 7.5 (4.3–10.4)   | 16.4% (-9.8 to 41.3%)    |
| Dietary risks                              | Stroke                                  | 15.4% (11–20.8%)   | 347.1 (234.7–492.1)  | -30.6% (-49.2 to -12%)   | 13.8% (10–18.5%)   | 16 (11–22.9)     | -26.4% (-45.5 to -7.3%)  |
|                                            | Ischaemic stroke                        | 16.8% (11.3–22.2%) | 269.7 (171.4–374.2)  | 2.6% (-24.8 to 32.6%)    | 14.8% (10.3–19.4%) | 13.1 (8.6–18.3)  | 2.9% (-23.4 to 31.8%)    |
|                                            | Intracerebral haemorrhage               | 11.8% (6.1–18.2%)  | 65.4 (33.1–106.4)    | -66.8% (-80.6 to -53%)   | 10.5% (5.5–16.2%)  | 2.5 (1.3–4.2)    | -67.5% (-80.4 to -54.6%) |
| Environmental/occupational risk factors§   | Subarachnoid haemorrhage                | 12% (6.3–18%)      | 12 (5.8–21.3)        | -69.9% (-83.5 to -56.3%) | 10.5% (5.6–16%)    | 0.4 (0.2–0.7)    | -70.8% (-84 to -57.6%)   |
|                                            | Meningitis                              | 1.6% (0.7–3.1%)    | 1.1 (0.4–2.3)        | -85.6% (-95.6 to -75.6%) | 0.9% (0.4–1.9%)    | <0.1 (<0.1–<0.1) | -85.6% (-95.6 to -75.6%) |
|                                            | Encephalitis                            | 0.9% (0.3–2.1%)    | 0.2 (0.1–0.5)        | -7.1% (-70.9 to 190%)    | 0.6% (0.1–1.2%)    | <0.1 (<0.1–<0.1) | -7.1% (-70.9 to 190%)    |
| High body-mass index                       | Stroke                                  | 34% (29.5–38.5%)   | 767.3 (587.7–965.5)  | -19.1% (-37.3 to 1.3%)   | 31.5% (27.2–35.9%) | 36.6 (28.3–46.3) | -14.4% (-33.8 to 7.5%)   |
|                                            | Ischaemic stroke                        | 32.9% (28.4–37.5%) | 528.5 (410.2–669.8)  | 19% (-9.6 to 47.8%)      | 30.6% (26.4–34.9%) | 27.2 (20.8–34.8) | 18.9% (-9.4 to 46.8%)    |
|                                            | Intracerebral haemorrhage               | 36.5% (31.8–41.3%) | 202.7 (148.8–264.8)  | -51.7% (-65.1 to -38.3%) | 34.3% (29.7–38.9%) | 8.1 (6–10.4)     | -51.7% (-64.9 to -38.5%) |
|                                            | Subarachnoid haemorrhage                | 35.9% (31.2–40.9%) | 36.1 (24.2–54.2)     | -57.5% (-72.8 to -42.2%) | 34% (29.3–38.8%)   | 1.3 (0.9–2)      | -57.1% (-72.1 to -42.1%) |
|                                            | Stroke                                  | 30.7% (20.7–40.9%) | 695.1 (432.3–999.1)  | 5% (-22.1 to 48.4%)      | 20.5% (12.9–28.9%) | 23.8 (13.8–35.8) | 11.4% (-18.6 to 58.4%)   |
|                                            | Ischaemic stroke                        | 25.3% (16.1–34.9%) | 405.5 (243.2–598.9)  | 82.4% (32.1 to 154.1%)   | 16.7% (9.9–24.9%)  | 14.9 (8.2–23.3)  | 87.5% (31.2 to 170.7%)   |
|                                            | Intracerebral haemorrhage               | 44% (31.3–56.8%)   | 244.3 (156.4–350.8)  | -32.5% (-53.2 to -11.8%) | 32.6% (21.9–44.7%) | 7.7 (4.6–11.4)   | -31.6% (-53.5 to -9.7%)  |
|                                            | Subarachnoid haemorrhage                | 45.1% (31.4–57.8%) | 45.3 (27.1–74.1)     | -41.6% (-63.9 to 19.7%)  | 32.6% (20.6–45.2%) | 1.3 (0.7–2.1)    | -42% (-64.6 to 13.7%)    |
|                                            | Neurological disorders*                 | 4.8% (1.4–10.9%)   | 64.3 (17.2–166.4)    | 67.2% (32.4 to 149.3%)   | 11.3% (3.8–21.7%)  | 4 (0.6–12.7)     | 70.8% (27.6 to 173.7%)   |
| High fasting plasma glucose                | Alzheimer's disease and other dementias | 16.6% (6.9–29.7%)  | 64.3 (17.2–166.4)    | 67.2% (32.4 to 149.3%)   | 15.8% (6.6–28.5%)  | 4 (0.6–12.7)     | 70.8% (27.6 to 173.7%)   |
|                                            | Stroke                                  | 32% (19.6–51.7%)   | 720.2 (429.3–1202.1) | 97.7% (40.1 to 173.2%)   | 32.8% (17.8–60%)   | 38 (20.3–69.3)   | 98.5% (36.6 to 176%)     |
|                                            | Ischaemic stroke                        | 33.5% (16.7–60.8%) | 535 (270–989.6)      | 167.7% (89.7 to 264.6%)  | 33.3% (15.6–68%)   | 29.5 (13.4–59.6) | 158% (82.1 to 257.4%)    |
|                                            | Intracerebral haemorrhage               | 28.8% (17.2–41.5%) | 159.5 (90.9–244)     | 15% (-21.6 to 69.3%)     | 31.2% (18.1–47.5%) | 7.4 (4–11.5)     | 12.4% (-23.3 to 64.4%)   |
|                                            | Subarachnoid haemorrhage                | 25.6% (15.6–38%)   | 25.7 (13.6–41.8)     | -0.2% (-37.9 to 87.8%)   | 29.8% (17.6–47%)   | 1.2 (0.6–2.1)    | -0.8% (-40.4 to 97.6%)   |
|                                            | Neurological disorders*                 | 3.8% (0.7–10.7%)   | 50.4 (8.8–159.9)     | 74.8% (54.5 to 105.9%)   | 9.3% (2–21.1%)     | 3.3 (0.4–12.4)   | 73.9% (46.8 to 113.9%)   |
|                                            | Alzheimer's disease and other dementias | 13% (3.1–27%)      | 50.4 (8.8–159.9)     | 74.8% (54.5 to 105.9%)   | 13.1% (3.2–27.2%)  | 3.3 (0.4–12.4)   | 73.9% (46.8 to 113.9%)   |



**Table S16** Regional and national disabilities and deaths related to neurological conditions attributable to risk factors in North Africa and Middle East countries

| Location<br>Risk factor (alphabetic order) | Cause                     | DALYs (95% UI)     |                        |                          | Deaths (95% UI)      |                  |                           |
|--------------------------------------------|---------------------------|--------------------|------------------------|--------------------------|----------------------|------------------|---------------------------|
|                                            |                           | PAF (%)            | Rate per 100,000       | Rate change (%)          | PAF (%)              | Rate per 100,000 | Rate change (%)           |
|                                            |                           | 2019               | 2019                   | From 1990 to 2019        | 2019                 | 2019             | From 1990 to 2019         |
| High LDL cholesterol                       | Stroke                    | 16.7% (9.8–28%)    | 378.2 (204.9–661.9)    | 27.1% (-1.6 to 60.2%)    | 15.2% (5.9–31.4%)    | 17.7 (6.6–38.5)  | 25.7% (-3.6 to 58%)       |
|                                            | Ischaemic stroke          | 23.5% (13.7–39.3%) | 378.2 (204.9–661.9)    | 27.1% (-1.6 to 60.2%)    | 19.9% (7.7–40.7%)    | 17.7 (6.6–38.5)  | 25.7% (-3.6 to 58%)       |
| High systolic blood pressure               | Stroke                    | 60.2% (51.3–68.3%) | 1360.9 (1030.4–1725.8) | -19.2% (-36.9 to 1.7%)   | 56.5% (46.8–66.3%)   | 65.8 (49–86.2)   | -16.1% (-34.9 to 6.5%)    |
|                                            | Ischaemic stroke          | 58.3% (47.3–68.3%) | 935.3 (694.8–1203.5)   | 17.5% (-9.1 to 46.3%)    | 54.3% (42.4–66.7%)   | 48.3 (34.1–65.6) | 16.6% (-10.5 to 47.3%)    |
|                                            | Intracerebral haemorrhage | 65.3% (55–74.5%)   | 361.8 (259.5–481.5)    | -51.3% (-65 to -32.3%)   | 63.6% (51.4–74.9%)   | 15 (10.7–20)     | -51.9% (-64.7 to -33.4%)  |
|                                            | Subarachnoid haemorrhage  | 63.7% (53.6–73.4%) | 63.8 (43.9–94.3)       | -56.5% (-72.2 to -24.1%) | 63.1% (50.8–74.9%)   | 2.5 (1.7–3.7)    | -57% (-72.4 to -20.5%)    |
| High temperature                           | Stroke                    | 0.5% (0–1.3%)      | 11 (0.2–28.9)          | -18% (-153.2 to 123%)    | 0.5% (0–1.4%)        | 0.6 (0–1.7)      | -10.4% (-158.8 to 145.5%) |
|                                            | Ischaemic stroke          | 0.5% (0–1.2%)      | 7.6 (0.1–20.2)         | 21.6% (-177.4 to 229.6%) | 0.5% (0–1.4%)        | 0.5 (0–1.3)      | 21.2% (-175.3 to 229.7%)  |
|                                            | Intracerebral haemorrhage | 0.5% (0–1.3%)      | 2.9 (0.1–7.5)          | -51.2% (-131.2 to 39%)   | 0.5% (0–1.4%)        | 0.1 (0–0.3)      | -50.4% (-131.8 to 45.1%)  |
|                                            | Subarachnoid haemorrhage  | 0.5% (0–1.3%)      | 0.5 (0–1.3)            | -59.9% (-124.4 to 11.6%) | 0.5% (0–1.4%)        | <0.1 (<0.1–0.1)  | -56% (-126 to 25.3%)      |
| Household air pollution from solid fuels   | Meningitis                | 0.1% (0–0.3%)      | 0.1 (0–0.2)            | -98.4% (-99.6 to -94.5%) | 0.1% (0–0.2%)        | <0.1 (<0.1–<0.1) | -98.4% (-99.6 to -94.5%)  |
|                                            | Encephalitis              | 0.1% (0–0.2%)      | <0.1 (<0.1–<0.1)       | -89.8% (-97.5 to -63.5%) | 0% (0–0.1%)          | <0.1 (<0.1–<0.1) | -89.8% (-97.5 to -63.5%)  |
|                                            | Stroke                    | 1.6% (0.7–3.1%)    | 35.6 (15.6–69.3)       | -91.8% (-96.2 to -84.5%) | 1.3% (0.6–2.6%)      | 1.6 (0.7–3.1)    | -91.5% (-96 to -84.1%)    |
|                                            | Ischaemic stroke          | 1.5% (0.7–3%)      | 24.4 (10.7–46.7)       | -87.9% (-94.2 to -76.9%) | 1.3% (0.6–2.5%)      | 1.2 (0.5–2.3)    | -88.2% (-94.3 to -77.4%)  |
|                                            | Intracerebral haemorrhage | 1.7% (0.7–3.3%)    | 9.5 (4–18.6)           | -95.1% (-97.7 to -90.3%) | 1.5% (0.7–2.9%)      | 0.4 (0.1–0.7)    | -95.2% (-97.7 to -90.5%)  |
|                                            | Subarachnoid haemorrhage  | 1.7% (0.8–3.4%)    | 1.7 (0.7–3.6)          | -95.5% (-98.1 to -89.6%) | 1.5% (0.7–3%)        | 0.1 (0–0.1)      | -95.7% (-98.2 to -89.4%)  |
| Kidney dysfunction                         | Stroke                    | 11.6% (9–14%)      | 260.8 (185–334.2)      | 37.1% (3.5 to 72.3%)     | 10.7% (7.2–14.1%)    | 12.5 (7.7–17)    | 40.9% (2.9 to 81.9%)      |
|                                            | Ischaemic stroke          | 12.7% (9.4–15.8%)  | 203.9 (138.2–267.2)    | 83.5% (39.7 to 128.5%)   | 11% (6.5–15.2%)      | 9.8 (5.4–14.1)   | 82.4% (30.9 to 133.4%)    |
|                                            | Intracerebral haemorrhage | 10.3% (8.3–12.5%)  | 56.9 (40.6–76.2)       | -28% (-48.1 to -0.2%)    | 11.5% (8.6–14.2%)    | 2.7 (1.9–3.6)    | -22.8% (-43 to 7.2%)      |
|                                            | Subarachnoid haemorrhage  | 3.5% (1.4–6%)      | 3.5 (1.3–6.8)          | -68% (-79.7 to -46.5%)   | 4.2% (2.6–9%)        | 0.2 (0.1–0.3)    | -61.9% (-74.7 to -33.3%)  |
| Lead exposure                              | Stroke                    | 3.8% (1.9–6%)      | 86 (41.7–138.9)        | -32.9% (-49.7 to -14.3%) | 4% (2.2–6%)          | 4.7 (2.4–7.4)    | -20.7% (-39.9 to 1.3%)    |
|                                            | Ischaemic stroke          | 3.8% (1.9–5.9%)    | 60.6 (29–98.1)         | 4.6% (-21.6 to 30%)      | 3.9% (2–6%)          | 3.4 (1.7–5.7)    | 16.2% (-12.2 to 43.5%)    |
|                                            | Intracerebral haemorrhage | 3.9% (1.7–6.4%)    | 21.8 (9.1–37.8)        | -63.1% (-74.6 to -48.2%) | 4.4% (2.1–6.9%)      | 1 (0.5–1.7)      | -57.8% (-69.4 to -41.9%)  |
|                                            | Subarachnoid haemorrhage  | 3.5% (1.4–6%)      | 3.5 (1.3–6.8)          | -68% (-79.7 to -46.5%)   | 4.2% (2.6–9%)        | 0.2 (0.1–0.3)    | -61.9% (-74.7 to -33.3%)  |
|                                            | Low birth weight          | Meningitis         | 9.1% (4.9–15.4%)       | 6.3 (2.9–11.9)           | -87% (-94.9 to -68%) | 5.2% (2.6–9.2%)  | 0.1 (0–0.1)               |
|                                            | Encephalitis              | 5% (1.8–9.6%)      | 1.2 (0.6–2.2)          | -20.7% (-66.1 to 78.7%)  | 3% (1–5.8%)          | <0.1 (<0.1–<0.1) | -20.7% (-66.1 to 78.7%)   |
| Low birth weight and short gestation       | Meningitis                | 9.8% (5.3–16.6%)   | 6.8 (3.1–12.7)         | -86.8% (-94.8 to -67.4%) | 5.6% (2.8–9.9%)      | 0.1 (0–0.1)      | -86.8% (-94.8 to -67.4%)  |
|                                            | Encephalitis              | 5.4% (2–10.4%)     | 1.3 (0.6–2.4)          | -19.3% (-65.2 to 84.1%)  | 3.3% (1.1–6.2%)      | <0.1 (<0.1–<0.1) | -19.3% (-65.3 to 84.1%)   |
| Low physical activity                      | Stroke                    | 5.6% (1.2–12.4%)   | 126.5 (25.2–277.9)     | 29.5% (2 to 60.6%)       | 7.1% (1.6–14.4%)     | 8.2 (1.8–16.7)   | 28.1% (-0.4 to 61.5%)     |
|                                            | Ischaemic stroke          | 7.9% (1.7–17.4%)   | 126.5 (25.2–277.9)     | 29.5% (2 to 60.6%)       | 9.3% (2.1–18.7%)     | 8.2 (1.8–16.7)   | 28.1% (-0.4 to 61.5%)     |
| Low temperature                            | Stroke                    | 6.4% (4.2–9%)      | 145.2 (90.2–218.3)     | -19.6% (-37.7 to 0.6%)   | 7.3% (4.8–10.2%)     | 8.5 (5.4–12.9)   | -12.2% (-29.5 to 8.6%)    |
|                                            | Ischaemic stroke          | 6.3% (4.1–8.8%)    | 100.6 (62.7–152.5)     | 19.2% (-9.3 to 46.8%)    | 7.3% (4.8–10.2%)     | 6.5 (4.1–9.9)    | 18.7% (-7.1 to 43.2%)     |
|                                            | Intracerebral haemorrhage | 6.9% (4.5–9.6%)    | 38 (23.1–57)           | -52.1% (-65.3 to -34.6%) | 7.3% (4.8–10.2%)     | 1.7 (1.1–2.6)    | -51.4% (-63.8 to -33.5%)  |
|                                            | Subarachnoid haemorrhage  | 6.6% (4.3–9.2%)    | 6.6 (3.6–11)           | -60.7% (-74.1 to -31.8%) | 7.3% (4.8–10.2%)     | 0.3 (0.2–0.5)    | -56.9% (-71.6 to -22.2%)  |

**Table S16** Regional and national disabilities and deaths related to neurological conditions attributable to risk factors in North Africa and Middle East countries

| Location<br>Risk factor (alphabetic order) | Cause                                   | DALYs (95% UI)     |                        |                          | Deaths (95% UI)    |                   |                          |
|--------------------------------------------|-----------------------------------------|--------------------|------------------------|--------------------------|--------------------|-------------------|--------------------------|
|                                            |                                         | PAF (%)            | Rate per 100,000       | Rate change (%)          | PAF (%)            | Rate per 100,000  | Rate change (%)          |
|                                            |                                         | 2019               | 2019                   | From 1990 to 2019        | 2019               | 2019              | From 1990 to 2019        |
| Metabolic risk factors†                    | Stroke                                  | 79.2% (72.4–85.7%) | 1788.4 (1418.9–2171.7) | -9.9% (-28.4 to 11.7%)   | 76% (66.6–85.9%)   | 88.5 (68.7–110.9) | -5.5% (-25 to 18.2%)     |
|                                            | Ischaemic stroke                        | 79.3% (70.6–88.3%) | 1272.2 (1005.6–1555.8) | 28.2% (-0.4 to 57.7%)    | 75.5% (63.7–88.8%) | 67.1 (50.4–84.8)  | 28.4% (-2.3 to 60.9%)    |
|                                            | Intracerebral haemorrhage               | 79.5% (72.2–85.3%) | 440.7 (328.7–565.3)    | -47% (-61.8 to -26.8%)   | 78.3% (69.9–85.8%) | 18.5 (14–23.3)    | -47.3% (-61.3 to -26.4%) |
|                                            | Subarachnoid haemorrhage                | 75.3% (66.6–82.2%) | 75.5 (53.1–109.9)      | -53.1% (-69.7 to -18.6%) | 74.7% (64.7–83.8%) | 2.9 (2–4.3)       | -53.4% (-70 to -14.3%)   |
|                                            | Neurological disorders*                 | 8% (2.6–17.4%)     | 106.3 (30.9–279.1)     | 65% (37.8 to 115.9%)     | 19.2% (7.4–33.8%)  | 6.8 (1.1–21.8)    | 66.7% (32.6 to 126.2%)   |
|                                            | Alzheimer's disease and other dementias | 27.5% (13.1–44.6%) | 106.3 (30.9–279.1)     | 65% (37.8 to 115.9%)     | 26.8% (12.6–43.9%) | 6.8 (1.1–21.8)    | 66.7% (32.6 to 126.2%)   |
| Non-optimal temperature                    | Stroke                                  | 6.9% (4.8–9.3%)    | 155.4 (101.3–229.3)    | -19.5% (-38.3 to 0.8%)   | 7.8% (5.4–10.5%)   | 9.1 (6–13.3)      | -12.1% (-30.6 to 9.7%)   |
|                                            | Ischaemic stroke                        | 6.7% (4.6–9%)      | 107.7 (70.1–158.7)     | 19.3% (-10.7 to 47.5%)   | 7.8% (5.4–10.5%)   | 6.9 (4.5–10.3)    | 18.8% (-7.1 to 44%)      |
|                                            | Intracerebral haemorrhage               | 7.3% (5.1–9.9%)    | 40.7 (25.9–59.4)       | -52.1% (-65.6 to -34.4%) | 7.8% (5.4–10.5%)   | 1.8 (1.2–2.7)     | -51.3% (-63.9 to -33.5%) |
|                                            | Subarachnoid haemorrhage                | 7% (4.8–9.5%)      | 7.1 (4.1–11.8)         | -60.6% (-74.5 to -31.7%) | 7.8% (5.4–10.5%)   | 0.3 (0.2–0.5)     | -56.8% (-71.8 to -22%)   |
| Other environmental risks                  | Stroke                                  | 3.8% (1.9–6%)      | 86 (41.7–138.9)        | -32.9% (-49.7 to -14.3%) | 4% (2.2–6%)        | 4.7 (2.4–7.4)     | -20.7% (-39.9 to 1.3%)   |
|                                            | Ischaemic stroke                        | 3.8% (1.9–5.9%)    | 60.6 (29–98.1)         | 4.6% (-21.6 to 30%)      | 3.9% (2–6%)        | 3.4 (1.7–5.7)     | 16.2% (-12.2 to 43.5%)   |
|                                            | Intracerebral haemorrhage               | 3.9% (1.7–6.4%)    | 21.8 (9.1–37.8)        | -63.1% (-74.6 to -48.2%) | 4.4% (2.1–6.9%)    | 1 (0.5–1.7)       | -57.8% (-69.4 to -41.9%) |
|                                            | Subarachnoid haemorrhage                | 3.5% (1.4–6%)      | 3.5 (1.3–6.8)          | -68% (-79.7 to -46.5%)   | 4.2% (2–6.9%)      | 0.2 (0.1–0.3)     | -61.9% (-74.7 to -33.3%) |
| Particulate matter pollution               | Meningitis                              | 1.6% (0.7–3.1%)    | 1.1 (0.4–2.3)          | -85.6% (-95.6 to -54.2%) | 0.9% (0.4–1.9%)    | <0.1 (<0.1–<0.1)  | -85.6% (-95.6 to -54.2%) |
|                                            | Encephalitis                            | 0.9% (0.3–2.1%)    | 0.2 (0.1–0.5)          | -7.1% (-70.9 to 190%)    | 0.6% (0.1–1.2%)    | <0.1 (<0.1–<0.1)  | -7.1% (-70.9 to 190%)    |
|                                            | Stroke                                  | 26.3% (22–30.4%)   | 593.3 (444.8–767.1)    | -17.8% (-37.4 to 4.6%)   | 22.6% (18.6–26.4%) | 26.3 (19.7–33.9)  | -14.6% (-35 to 8.1%)     |
|                                            | Ischaemic stroke                        | 25.3% (21.1–29.4%) | 405.3 (307.6–519.3)    | 20.7% (-8.7 to 51.1%)    | 21.7% (17.8–25.4%) | 19.3 (14.4–25.1)  | 19.1% (-11.4 to 50.6%)   |
|                                            | Intracerebral haemorrhage               | 28.7% (24–33.1%)   | 159.3 (114.3–213.7)    | -50.4% (-64.6 to -30.2%) | 25.5% (21.2–29.6%) | 6 (4.4–7.9)       | -51.1% (-64.9 to -31.8%) |
|                                            | Subarachnoid haemorrhage                | 28.5% (23.8–33.2%) | 28.7 (18.9–42.7)       | -55.7% (-72.1 to -22.6%) | 25.3% (20.7–29.9%) | 1 (0.6–1.5)       | -56.7% (-72.5 to -20.3%) |
|                                            | Stroke                                  | 3.4% (2.5–4.3%)    | 76.1 (52.3–103.5)      | -34.1% (-50.5 to -14.7%) | 2.8% (2.1–3.6%)    | 3.3 (2.2–4.4)     | -31.6% (-47.8 to -13.8%) |
| Secondhand smoke                           | Ischaemic stroke                        | 3.1% (2.3–4%)      | 49.8 (34.2–68.4)       | 0.3% (-25 to 28%)        | 2.6% (1.9–3.4%)    | 2.3 (1.6–3.2)     | -2.8% (-27.1 to 21.3%)   |
|                                            | Intracerebral haemorrhage               | 4% (2.9–5.2%)      | 22.2 (14.4–31.2)       | -59.1% (-71 to -40.8%)   | 3.4% (2.5–4.3%)    | 0.8 (0.5–1.1)     | -59.8% (-71.5 to -42.9%) |
|                                            | Subarachnoid haemorrhage                | 4.1% (2.9–5.4%)    | 4.1 (2.4–6.6)          | -64.6% (-78.4 to -37.2%) | 3.4% (2.5–4.6%)    | 0.1 (0.1–0.2)     | -65.1% (-78.2 to -36.5%) |
|                                            | Meningitis                              | 6.9% (3.7–11.6%)   | 4.8 (2.2–8.8)          | -85.1% (-94 to -64%)     | 4% (2–6.9%)        | 0.1 (0–0.1)       | -85.1% (-94 to -64%)     |
| Short gestation                            | Encephalitis                            | 3.9% (1.4–7.6%)    | 0.9 (0.4–1.8)          | -10.5% (-62.2 to 104.6%) | 2.4% (0.8–4.5%)    | <0.1 (<0.1–<0.1)  | -10.5% (-62.2 to 104.6%) |
|                                            | Stroke                                  | 8.5% (7.3–9.8%)    | 192.6 (143.6–248.6)    | -41% (-56.8 to -22.1%)   | 6.3% (5.3–7.3%)    | 7.3 (5.4–9.5)     | -39.4% (-55.9 to -20.2%) |
| Smoking                                    | Ischaemic stroke                        | 7.7% (6.6–8.9%)    | 124.1 (91.7–159.3)     | -10.6% (-36.3 to 19.9%)  | 5.6% (4.7–6.6%)    | 5 (3.7–6.6)       | -10.9% (-37.2 to 20.9%)  |
|                                            | Intracerebral haemorrhage               | 10.6% (9–12.5%)    | 59.1 (40.9–80.1)       | -63.2% (-74.9 to -47.4%) | 8.6% (7.1–10.1%)   | 2 (1.4–2.7)       | -63.7% (-75.1 to -48.9%) |
|                                            | Subarachnoid haemorrhage                | 9.2% (7.2–11.7%)   | 9.4 (5.6–15.9)         | -65.7% (-78.6 to -37.3%) | 7.6% (5.5–9.9%)    | 0.3 (0.2–0.5)     | -66.6% (-79.2 to -37%)   |
|                                            | Neurological disorders*                 | 2.4% (0.8–5.3%)    | 32.6 (9.6–84.6)        | -26.7% (-43.5 to -11.5%) | 5.1% (1.2–9%)      | 1.9 (0.2–6.1)     | -22.6% (-49.5 to -2.5%)  |

**Table S16** Regional and national disabilities and deaths related to neurological conditions attributable to risk factors in North Africa and Middle East countries

| Location<br>Risk factor (alphabetic order) | Cause                                   | DALYs (95% UI)     |                        |                          | Deaths (95% UI)    |                        |                          |
|--------------------------------------------|-----------------------------------------|--------------------|------------------------|--------------------------|--------------------|------------------------|--------------------------|
|                                            |                                         | PAF (%)            | Rate per 100,000       | Rate change (%)          | PAF (%)            | Rate per 100,000       | Rate change (%)          |
|                                            |                                         | 2019               | 2019                   | From 1990 to 2019        | 2019               | 2019                   | From 1990 to 2019        |
| Tobacco                                    | Alzheimer's disease and other dementias | 9.4% (5.6–13.4%)   | 36.2 (13.3–88.2)       | -25.1% (-40.2 to -9.7%)  | 8.4% (4.9–12.3%)   | 2.1 (0.5–6.4)          | -20.5% (-40.6 to 0.5%)   |
|                                            | Parkinson's disease                     | -5.2% (-8–2.6%)    | -5 (-7.8–2.4)          | -7.9% (-33.3 to 24.8%)   | -4.6% (-7.2–2.2%)  | -0.3 (-0.4–0.1)        | -1.8% (-30.7 to 36.2%)   |
|                                            | Multiple sclerosis                      | 6.8% (4.9–8.8%)    | 1.4 (0.9–1.9)          | -9.9% (-36.8 to 23.1%)   | 7.1% (4.8–9.8%)    | <0.1 (<0.1–<0.1)       | -9.7% (-48.2 to 38.9%)   |
|                                            | Stroke                                  | 11.6% (10.2–13.1%) | 262 (197.1–333.2)      | -38.8% (-54.5 to -20.8%) | 8.9% (7.7–10.2%)   | 10.4 (7.7–13.1)        | -36.9% (-53 to -19.3%)   |
|                                            | Ischaemic stroke                        | 10.6% (9.3–12%)    | 169.9 (129.2–212.9)    | -7.3% (-31.9 to 20.9%)   | 8.1% (6.9–9.3%)    | 7.2 (5.4–9.3)          | -8.1% (-34.6 to 19%)     |
|                                            | Intracerebral haemorrhage               | 14.2% (12.4–16.4%) | 79 (56.4–105.4)        | -61.9% (-73.8 to -46.7%) | 11.7% (10–13.6%)   | 2.8 (2–3.6)            | -62.5% (-73.8 to -47.9%) |
|                                            | Subarachnoid haemorrhage                | 12.9% (10.8–15.3%) | 13.1 (8.3–20.7)        | -65.2% (-77.8 to -38%)   | 10.8% (8.6–13.1%)  | 0.4 (0.3–0.7)          | -65.9% (-78.4 to -37.8%) |
|                                            | Neurological disorders*                 | 2.4% (0.8–5.3%)    | 32.6 (9.6–84.6)        | -26.7% (-43.5 to -11.5%) | 5.1% (1.2–9%)      | 1.9 (0.2–6.1)          | -22.6% (-49.5 to -2.5%)  |
|                                            | Alzheimer's disease and other dementias | 9.4% (5.6–13.4%)   | 36.2 (13.3–88.2)       | -25.1% (-40.2 to -9.7%)  | 8.4% (4.9–12.3%)   | 2.1 (0.5–6.4)          | -20.5% (-40.6 to 0.5%)   |
|                                            | Parkinson's disease                     | -5.2% (-8–2.6%)    | -5 (-7.8–2.4)          | -7.9% (-33.3 to 24.8%)   | -4.6% (-7.2–2.2%)  | -0.3 (-0.4–0.1)        | -1.8% (-30.7 to 36.2%)   |
| Multiple sclerosis                         | 6.8% (4.9–8.8%)                         | 1.4 (0.9–1.9)      | -9.9% (-36.8 to 23.1%) | 7.1% (4.8–9.8%)          | <0.1 (<0.1–<0.1)   | -9.7% (-48.2 to 38.9%) |                          |
| <b>Palestine</b>                           |                                         |                    |                        |                          |                    |                        |                          |
| Air pollution                              | Meningitis                              | 0.6% (0.2–1.1%)    | 0.2 (0.1–0.5)          | -88.4% (-96 to -66%)     | 0.3% (0.1–0.6%)    | <0.1 (<0.1–<0.1)       | -88.4% (-96 to -66%)     |
|                                            | Encephalitis                            | 0.3% (0.1–0.6%)    | <0.1 (<0.1–0.1)        | -34.1% (-83.5 to 126.1%) | 0.2% (0.1–0.4%)    | <0.1 (<0.1–<0.1)       | -34.1% (-83.5 to 126.2%) |
|                                            | Stroke                                  | 22.8% (17.5–27.8%) | 485.7 (356.7–612.5)    | -39.6% (-54.1 to -22.2%) | 19.6% (14.9–24%)   | 24 (17.5–30.6)         | -38.2% (-52.6 to -20.4%) |
|                                            | Ischaemic stroke                        | 22% (16.8–26.8%)   | 350.3 (258–442.5)      | -26.1% (-43.3 to -6.5%)  | 19% (14.5–23.3%)   | 18.3 (13.2–23.4)       | -25.8% (-43.2 to -4.7%)  |
|                                            | Intracerebral haemorrhage               | 25% (19.4–30.2%)   | 122 (88–155.9)         | -59.8% (-70.2 to -45.9%) | 21.9% (16.7–26.8%) | 5.3 (3.8–6.8)          | -60.3% (-70.2 to -46.9%) |
|                                            | Subarachnoid haemorrhage                | 26.7% (21–32.2%)   | 13.4 (9.8–17.3)        | -49% (-64.2 to -25.8%)   | 23% (17.8–28%)     | 0.4 (0.3–0.6)          | -54.3% (-69.6 to -28.8%) |
| Alcohol use                                | Stroke                                  | 1.1% (0.7–1.5%)    | 22.8 (14.3–32.3)       | -13.5% (-48.6 to 88.6%)  | 0.7% (0.4–1.1%)    | 0.9 (0.5–1.3)          | -12.9% (-51.1 to 112.3%) |
|                                            | Ischaemic stroke                        | 0.5% (0.2–0.9%)    | 8.7 (3.2–15.1)         | 42.8% (-40.3 to 532%)    | 0.4% (0.1–0.7%)    | 0.4 (0.1–0.7)          | 45.1% (-532.5 to 873.2%) |
|                                            | Intracerebral haemorrhage               | 2.9% (2–4.1%)      | 14.1 (9.1–21.3)        | -30.4% (-56.4 to 32.7%)  | 2.2% (1.5–3.1%)    | 0.5 (0.3–0.8)          | -32% (-57.8 to 36.2%)    |
|                                            | Neurological disorders*                 | 0.5% (0.2–1%)      | 6.6 (3.5–11.2)         | 17.3% (-39.2 to 139.2%)  | 0.3% (0.1–0.6%)    | 0.1 (0–0.1)            | 14.2% (-26.1 to 95.1%)   |
| All risk factors                           | Idiopathic epilepsy                     | 4.1% (2.6–6%)      | 6.6 (3.5–11.2)         | 17.3% (-39.2 to 139.2%)  | 4.6% (2.9–6.7%)    | 0.1 (0–0.1)            | 14.2% (-26.1 to 95.1%)   |
|                                            | Meningitis                              | 4% (2.6–5.9%)      | 1.6 (1–2.5)            | -87.7% (-93.8 to -75.9%) | 2% (1.3–3%)        | <0.1 (<0.1–<0.1)       | -87.7% (-93.8 to -75.9%) |
|                                            | Encephalitis                            | 2% (1.1–3.3%)      | 0.3 (0.2–0.5)          | -29.7% (-70.3 to 56.6%)  | 1.3% (0.7–2.1%)    | <0.1 (<0.1–<0.1)       | -29.7% (-70.3 to 56.6%)  |
|                                            | Stroke                                  | 85.8% (81.3–91%)   | 1825.8 (1582.8–2103.3) | -31.4% (-45.6 to -13.5%) | 83.1% (76.9–90.2%) | 101.7 (86.2–119.4)     | -28.3% (-43.1 to -8.1%)  |
|                                            | Ischaemic stroke                        | 85.9% (80.3–92.7%) | 1366.3 (1171.8–1577.9) | -16.8% (-33.6 to 4.7%)   | 83% (75.7–92.3%)   | 80.1 (66.2–95.1)       | -14.8% (-32.5 to 8.7%)   |
|                                            | Intracerebral haemorrhage               | 85.8% (81.4–89.8%) | 418.2 (354.1–493.4)    | -55.6% (-66.1 to -41.5%) | 83.5% (77.7–89.2%) | 20.1 (16.8–23.9)       | -55.1% (-65.6 to -41.3%) |
|                                            | Subarachnoid haemorrhage                | 82.5% (77.4–86.5%) | 41.3 (34.3–49.4)       | -45% (-61.1 to -20%)     | 81% (74.3–87%)     | 1.5 (1.1–1.8)          | -49.2% (-65.7 to -21.9%) |
| Neurological disorders*                    | 10.8% (4.1–21.9%)                       | 146.9 (53.9–374.1) | 16.2% (-6.5 to 45.9%)  | 22.9% (9–38.1%)          | 8.7 (1.5–27.8)     | 15.2% (-10.5 to 60.8%) |                          |

**Table S16** Regional and national disabilities and deaths related to neurological conditions attributable to risk factors in North Africa and Middle East countries

| Location<br>Risk factor (alphabetic order) | Cause                                   | DALYs (95% UI)       |                     |                          | Deaths (95% UI)     |                  |                          |
|--------------------------------------------|-----------------------------------------|----------------------|---------------------|--------------------------|---------------------|------------------|--------------------------|
|                                            |                                         | PAF (%)              | Rate per 100,000    | Rate change (%)          | PAF (%)             | Rate per 100,000 | Rate change (%)          |
|                                            |                                         | 2019                 | 2019                | From 1990 to 2019        | 2019                | 2019             | From 1990 to 2019        |
| Ambient particulate matter pollution       | Alzheimer's disease and other dementias | 38% (23·8–53·4%)     | 147·9 (55–374·5)    | 12·7% (-9·4 to 42%)      | 35·2% (21·1–51%)    | 9·1 (1·9–28·3)   | 11·9% (-13·5 to 49·3%)   |
|                                            | Parkinson's disease                     | -10·9% (-16·1–-5·7%) | -10·1 (-15·8–-4·8)  | -21·6% (-45·4 to 21·8%)  | -9·2% (-13·9–-4·7%) | -0·6 (-0·9–0·3)  | -22·3% (-47·5 to 25·7%)  |
|                                            | Idiopathic epilepsy                     | 4·1% (2·6–6%)        | 6·6 (3·5–11·2)      | 17·3% (-39·2 to 139·2%)  | 4·6% (2·9–6·7%)     | 0·1 (0–0·1)      | 14·2% (-26·1 to 95·1%)   |
|                                            | Multiple sclerosis                      | 13% (9·6–17·7%)      | 2·5 (1·6–3·8)       | 2·9% (-34·2 to 43%)      | 14·7% (10·7–21%)    | <0·1 (<0·1–0·1)  | -6·6% (-51 to 56%)       |
|                                            | Meningitis                              | 0·6% (0·2–1·1%)      | 0·2 (0·1–0·4)       | -72·8% (-91·2 to -1·3%)  | 0·3% (0·1–0·5%)     | <0·1 (<0·1–<0·1) | -72·9% (-91·2 to -1·3%)  |
|                                            | Encephalitis                            | 0·3% (0·1–0·6%)      | <0·1 (<0·1–0·1)     | 55·3% (-61·5 to 602·2%)  | 0·2% (0·1–0·4%)     | <0·1 (<0·1–<0·1) | 55·3% (-61·5 to 602·5%)  |
|                                            | Stroke                                  | 22·5% (17·2–27·2%)   | 477·9 (349–603·3)   | 27·7% (-18·1 to 142·3%)  | 19·3% (14·5–23·6%)  | 23·6 (17·2–30·1) | 30·7% (-16·6 to 145·4%)  |
|                                            | Ischaemic stroke                        | 21·7% (16·6–26·5%)   | 344·6 (251·1–434·4) | 56·7% (2·1 to 197·6%)    | 18·7% (14·1–22·9%)  | 18 (13–23·1)     | 57·4% (-0·9 to 195·6%)   |
|                                            | Intracerebral haemorrhage               | 24·6% (18·8–29·8%)   | 120·1 (86·9–154·1)  | -15·6% (-47·8 to 61·1%)  | 21·5% (16·4–26·3%)  | 5·2 (3·7–6·7)    | -16·5% (-47·3 to 61%)    |
| Behavioural risk factors‡                  | Subarachnoid haemorrhage                | 26·3% (20·5–31·7%)   | 13·2 (9·6–17)       | 10·2% (-33·1 to 120·8%)  | 22·6% (17·3–27·6%)  | 0·4 (0·3–0·5)    | -1·2% (-42·8 to 107·4%)  |
|                                            | Meningitis                              | 3·9% (2·5–5·7%)      | 1·6 (1–2·4)         | -87·6% (-93·8 to -75·6%) | 2% (1·2–2·9%)       | <0·1 (<0·1–<0·1) | -87·6% (-93·8 to -75·6%) |
|                                            | Encephalitis                            | 1·9% (1·1–3·2%)      | 0·3 (0·2–0·5)       | -29·3% (-69·2 to 56·7%)  | 1·2% (0·7–2%)       | <0·1 (<0·1–<0·1) | -29·3% (-69·2 to 56·7%)  |
|                                            | Stroke                                  | 38·1% (32·8–43·7%)   | 810·7 (655·4–989)   | -37·4% (-51·3 to -20%)   | 34·5% (28·8–40·8%)  | 42·3 (33·2–52·5) | -34·6% (-49·1 to -17%)   |
|                                            | Ischaemic stroke                        | 38·5% (32·2–45·5%)   | 612·3 (483·4–763·2) | -23·3% (-39·7 to -2·5%)  | 35·2% (28·5–42·8%)  | 33·9 (25·8–43·2) | -21·6% (-38·5 to 0%)     |
|                                            | Intracerebral haemorrhage               | 37% (31·3–43%)       | 180·7 (140·6–228·7) | -60·8% (-70·8 to -46·7%) | 32·2% (26·5–37·8%)  | 7·8 (6–9·9)      | -61·3% (-71·3 to -47·9%) |
|                                            | Subarachnoid haemorrhage                | 35·5% (29·6–41·9%)   | 17·8 (13·6–22·3)    | -51·5% (-66·5 to -27·7%) | 30·7% (25–37%)      | 0·6 (0·4–0·7)    | -56·3% (-71·6 to -30·8%) |
|                                            | Neurological disorders*                 | 4·4% (1·7–8·9%)      | 59·6 (21·8–146·8)   | -12·1% (-29·7 to 14·2%)  | 7·7% (1·6–13·6%)    | 3 (0·3–9·4)      | -20·2% (-44 to 15·7%)    |
|                                            | Alzheimer's disease and other dementias | 15·6% (10·1–20·9%)   | 60·6 (23·4–143·4)   | -16·6% (-32·9 to 7%)     | 13·3% (8·3–18·1%)   | 3·5 (0·7–9·9)    | -21·2% (-40·1 to 8%)     |
| Child and maternal malnutrition            | Parkinson's disease                     | -10·9% (-16·1–-5·7%) | -10·1 (-15·8–-4·8)  | -21·6% (-45·4 to 21·8%)  | -9·2% (-13·9–-4·7%) | -0·6 (-0·9–0·3)  | -22·3% (-47·5 to 25·7%)  |
|                                            | Idiopathic epilepsy                     | 4·1% (2·6–6%)        | 6·6 (3·5–11·2)      | 17·3% (-39·2 to 139·2%)  | 4·6% (2·9–6·7%)     | 0·1 (0–0·1)      | 14·2% (-26·1 to 95·1%)   |
|                                            | Multiple sclerosis                      | 13% (9·6–17·7%)      | 2·5 (1·6–3·8)       | 2·9% (-34·2 to 43%)      | 14·7% (10·7–21%)    | <0·1 (<0·1–0·1)  | -6·6% (-51 to 56%)       |
|                                            | Meningitis                              | 3·9% (2·5–5·7%)      | 1·6 (1–2·4)         | -87·6% (-93·8 to -75·6%) | 2% (1·2–2·9%)       | <0·1 (<0·1–<0·1) | -87·6% (-93·8 to -75·6%) |
|                                            | Encephalitis                            | 1·9% (1·1–3·2%)      | 0·3 (0·2–0·5)       | -29·3% (-69·2 to 56·7%)  | 1·2% (0·7–2%)       | <0·1 (<0·1–<0·1) | -29·3% (-69·2 to 56·7%)  |
| Diet high in red meat                      | Stroke                                  | 2·1% (0·7–3·4%)      | 44·2 (14·1–74·3)    | -43·2% (-60·5 to -24%)   | 1·7% (0·5–2·7%)     | 2 (0·7–3·4)      | -40·5% (-58·4 to -19·9%) |
|                                            | Ischaemic stroke                        | 1·9% (0·3–3·1%)      | 29·7 (4·5–51·5)     | -28·4% (-44·9 to -7%)    | 1·5% (0·3–2·5%)     | 1·5 (0·3–2·5)    | -25·4% (-44·1 to -3·3%)  |
|                                            | Intracerebral haemorrhage               | 2·7% (0·3–4·6%)      | 13 (1·5–23·6)       | -61% (-71 to -47·3%)     | 2·3% (0·3–3·9%)     | 0·5 (0·1–1)      | -60·7% (-70·7 to -46·9%) |
|                                            | Subarachnoid haemorrhage                | 3% (0·3–5·2%)        | 1·5 (0·2–2·8)       | -50·6% (-65·6 to -29%)   | 2·4% (0·3–4·1%)     | <0·1 (<0·1–0·1)  | -55·4% (-70·4 to -30·4%) |
| Diet high in sodium                        | Stroke                                  | 1·7% (0·3–6·8%)      | 37·1 (5·5–149·7)    | -34·6% (-62 to 19·6%)    | 1·4% (0·3–5·7%)     | 1·8 (0·3–6·9)    | -33·9% (-60·5 to 24·7%)  |
|                                            | Ischaemic stroke                        | 1·6% (0·3–6·3%)      | 25·7 (4–103·2)      | -18·8% (-54·2 to 51·1%)  | 1·3% (0·3–5·3%)     | 1·3 (0·2–5·1)    | -19% (-52·3 to 52·9%)    |
|                                            | Intracerebral haemorrhage               | 2·1% (0·3–8·4%)      | 10·3 (1·2–42·9)     | -55·5% (-75·7 to -17·5%) | 1·8% (0·3–7·4%)     | 0·4 (0·1–1·8)    | -56·4% (-75·9 to -17·7%) |
|                                            | Subarachnoid haemorrhage                | 2% (0·3–8%)          | 1 (0·1–4)           | -42·6% (-70·7 to 7·5%)   | 1·8% (0·3–7·1%)     | <0·1 (<0·1–0·1)  | -48·7% (-74·7 to -0·1%)  |

**Table S16** Regional and national disabilities and deaths related to neurological conditions attributable to risk factors in North Africa and Middle East countries

| Location<br>Risk factor (alphabetic order) | Cause                                   | DALYs (95% UI)     |                      |                          | Deaths (95% UI)    |                  |                          |
|--------------------------------------------|-----------------------------------------|--------------------|----------------------|--------------------------|--------------------|------------------|--------------------------|
|                                            |                                         | PAF (%)            | Rate per 100,000     | Rate change (%)          | PAF (%)            | Rate per 100,000 | Rate change (%)          |
|                                            |                                         | 2019               | 2019                 | From 1990 to 2019        | 2019               | 2019             | From 1990 to 2019        |
| Diet low in fibre                          | Stroke                                  | 5.5% (1.6–9.2%)    | 118.1 (32.6–199.2)   | -31.8% (-47.5 to -9.6%)  | 4.8% (1.4–7.9%)    | 5.9 (1.7–9.8)    | -29.4% (-45.4 to -7.6%)  |
|                                            | Ischaemic stroke                        | 5.3% (1.5–8.7%)    | 83.7 (23.7–141)      | -16.2% (-35.8 to 9.7%)   | 4.6% (1.3–7.5%)    | 4.4 (1.3–7.3)    | -14.3% (-34.1 to 12.8%)  |
|                                            | Intracerebral haemorrhage               | 6.3% (1.7–10.5%)   | 30.8 (8.2–52.6)      | -54.1% (-66.1 to -37.5%) | 5.7% (1.6–9.5%)    | 1.4 (0.4–2.3)    | -54% (-65.8 to -37.3%)   |
|                                            | Subarachnoid haemorrhage                | 7% (2–11.6%)       | 3.5 (0.9–5.9)        | -42% (-59.1 to -15.9%)   | 6% (1.7–10%)       | 0.1 (0–0.2)      | -47.8% (-65.8 to -18.5%) |
| Diet low in fruits                         | Stroke                                  | 4.8% (2–7.8%)      | 101.8 (43.5–170.4)   | -44.5% (-62 to -25.1%)   | 4% (1.6–6.6%)      | 4.9 (2–8.3)      | -42.8% (-61.3 to -22.3%) |
|                                            | Ischaemic stroke                        | 4% (0.9–7.6%)      | 62.8 (15.3–124.1)    | -28% (-49.8 to -6.2%)    | 3.3% (0.8–6.4%)    | 3.2 (0.8–6.2)    | -26.4% (-50.4 to -1.7%)  |
|                                            | Intracerebral haemorrhage               | 7.2% (3.3–13.1%)   | 35 (15.9–67.8)       | -60.4% (-72.4 to -45.5%) | 6.3% (3–11.6%)     | 1.5 (0.7–3)      | -60.5% (-72.2 to -45.5%) |
|                                            | Subarachnoid haemorrhage                | 8% (3.8–14.6%)     | 4 (1.8–7.5)          | -49.4% (-65 to -25.9%)   | 6.7% (3.2–12.4%)   | 0.1 (0.1–0.2)    | -54.9% (-71.7 to -28.5%) |
| Diet low in vegetables                     | Stroke                                  | 1.8% (0.5–3.3%)    | 38.3 (11.1–69.8)     | -78.2% (-91.2 to -58.8%) | 1.9% (0.7–3.2%)    | 2.3 (0.8–4)      | -71.7% (-86.1 to -51.7%) |
|                                            | Ischaemic stroke                        | 1.7% (0.3–3.2%)    | 26.5 (4.3–52.4)      | -64.9% (-87.4 to -24.5%) | 1.7% (0.3–3.2%)    | 1.7 (0.3–3.1)    | -56.6% (-79.8 to -21.1%) |
|                                            | Intracerebral haemorrhage               | 2.2% (0.3–6%)      | 10.6 (1.3–29.4)      | -88.4% (-96.9 to -68%)   | 2.5% (0.4–5.9%)    | 0.6 (0.1–1.4)    | -85% (-94.3 to -66.9%)   |
|                                            | Subarachnoid haemorrhage                | 2.2% (0.2–6.4%)    | 1.1 (0.1–3.2)        | -86.7% (-97.2 to -58.3%) | 2.4% (0.3–5.9%)    | <0.1 (<0.1–0.1)  | -84.8% (-95.2 to -60%)   |
| Diet low in whole grains                   | Stroke                                  | 6.3% (3.4–8.1%)    | 134 (73.2–181.9)     | -23.1% (-39.4 to -3.2%)  | 6.1% (3.5–7.7%)    | 7.4 (4.3–10.1)   | -21.2% (-38.1 to 0.9%)   |
|                                            | Ischaemic stroke                        | 8.4% (4.6–10.8%)   | 134 (73.2–181.9)     | -23.1% (-39.4 to -3.2%)  | 7.7% (4.5–9.7%)    | 7.4 (4.3–10.1)   | -21.2% (-38.1 to 0.9%)   |
| Dietary risks                              | Stroke                                  | 20.2% (15–25.8%)   | 430.4 (311.8–565.6)  | -42.5% (-55.2 to -25.6%) | 18.4% (13.6–23.2%) | 22.5 (16.1–29.6) | -39% (-52.8 to -20.7%)   |
|                                            | Ischaemic stroke                        | 20.6% (14.9–26.4%) | 328.5 (229.8–439)    | -27.5% (-42.8 to -7.2%)  | 18.6% (13.5–23.6%) | 18 (12.6–23.9)   | -24.9% (-41.4 to -2.9%)  |
|                                            | Intracerebral haemorrhage               | 18.8% (12.2–26.2%) | 91.8 (56.9–134.4)    | -66.1% (-76.5 to -52.1%) | 17.4% (11.3–24.2%) | 4.2 (2.6–6.1)    | -65.3% (-75.2 to -52%)   |
|                                            | Subarachnoid haemorrhage                | 20.2% (13.2–28%)   | 10.1 (6.3–14.4)      | -57.2% (-71.4 to -34.5%) | 17.8% (11.6–24.9%) | 0.3 (0.2–0.5)    | -60.9% (-75.5 to -36.9%) |
| Environmental/occupational risk factors§   | Meningitis                              | 0.6% (0.2–1.1%)    | 0.2 (0.1–0.5)        | -88.4% (-96 to -66%)     | 0.3% (0.1–0.6%)    | <0.1 (<0.1–<0.1) | -88.4% (-96 to -66%)     |
|                                            | Encephalitis                            | 0.3% (0.1–0.6%)    | <0.1 (<0.1–0.1)      | -34.1% (-83.5 to 126.1%) | 0.2% (0.1–0.4%)    | <0.1 (<0.1–<0.1) | -34.1% (-83.5 to 126.2%) |
|                                            | Stroke                                  | 29.7% (23.7–35.4%) | 631.9 (486.1–785)    | -39.5% (-53.3 to -22.3%) | 27.4% (21.8–33%)   | 33.6 (25.5–42)   | -36.7% (-50.6 to -18.7%) |
|                                            | Ischaemic stroke                        | 28.9% (23–34.5%)   | 459.4 (352.2–573)    | -25.8% (-42.2 to -5.6%)  | 26.8% (21.2–32.4%) | 25.8 (19.4–32.5) | -23.9% (-41 to -3%)      |
|                                            | Intracerebral haemorrhage               | 32.1% (25.7–38.1%) | 156.3 (118.5–197)    | -60.3% (-70 to -46.9%)   | 29.8% (23.8–35.9%) | 7.2 (5.5–9.2)    | -59.8% (-69.3 to -46.8%) |
|                                            | Subarachnoid haemorrhage                | 32.5% (26.1–38.1%) | 16.3 (12.2–21.1)     | -50.4% (-65.5 to -27.1%) | 30.5% (24.3–36.5%) | 0.6 (0.4–0.7)    | -54% (-69.2 to -28.8%)   |
| High body-mass index                       | Stroke                                  | 25.5% (16.9–34.5%) | 542.5 (354.3–758.9)  | -21.3% (-40.5 to 7%)     | 16.2% (9.9–23.4%)  | 19.8 (11.9–29.8) | -18.9% (-40 to 14.7%)    |
|                                            | Ischaemic stroke                        | 21% (13.3–29.3%)   | 333.6 (207.8–482.4)  | 4.3% (-20.7 to 42%)      | 13.3% (7.8–20.1%)  | 12.9 (7.3–20.4)  | 8.1% (-20.5 to 58.8%)    |
|                                            | Intracerebral haemorrhage               | 38.1% (26.5–49.7%) | 185.8 (124.5–256.6)  | -44.6% (-59.5 to -21.9%) | 26.4% (17.3–36.9%) | 6.4 (4–9.3)      | -45.1% (-60 to -20.7%)   |
|                                            | Subarachnoid haemorrhage                | 46% (34–57.6%)     | 23 (16.1–30.7)       | -31.7% (-51.4 to 2.6%)   | 30.9% (20.9–42.5%) | 0.6 (0.4–0.8)    | -38.9% (-59.3 to -1.5%)  |
|                                            | Neurological disorders*                 | 3.8% (1.9–3%)      | 51.9 (12.9–136.8)    | 39.7% (8.1 to 122.5%)    | 8.6% (2.4–18.1%)   | 3.2 (0.5–9.7)    | 42.4% (3.7 to 159.6%)    |
|                                            | Alzheimer's disease and other dementias | 13.4% (4.6–25.9%)  | 51.9 (12.9–136.8)    | 39.7% (8.1 to 122.5%)    | 12.3% (3.9–24.3%)  | 3.2 (0.5–9.7)    | 42.4% (3.7 to 159.6%)    |
| High fasting plasma glucose                | Stroke                                  | 34.4% (20.4–57.2%) | 733.5 (439.8–1237.8) | -3.8% (-30.7 to 35.6%)   | 33.5% (18.3–63.2%) | 41 (22.2–78.8)   | -3.1% (-30.8 to 37.4%)   |
|                                            | Ischaemic stroke                        | 35.1% (17.4–66%)   | 559.1 (277.8–1051.1) | 13.8% (-15.5 to 59.9%)   | 33.7% (15.6–71.1%) | 32.5 (14.7–69.3) | 13.9% (-17.1 to 59.6%)   |

**Table S16** Regional and national disabilities and deaths related to neurological conditions attributable to risk factors in North Africa and Middle East countries

| Location<br>Risk factor (alphabetic order) | Cause                                   | DALYs (95% UI)     |                      |                           | Deaths (95% UI)    |                  |                           |
|--------------------------------------------|-----------------------------------------|--------------------|----------------------|---------------------------|--------------------|------------------|---------------------------|
|                                            |                                         | PAF (%)            | Rate per 100,000     | Rate change (%)           | PAF (%)            | Rate per 100,000 | Rate change (%)           |
|                                            |                                         | 2019               | 2019                 | From 1990 to 2019         | 2019               | 2019             | From 1990 to 2019         |
|                                            | Intracerebral haemorrhage               | 32.9% (19.9–47.9%) | 160.7 (93.5–243.2)   | -36.6% (-55.9 to -6.9%)   | 33.1% (19.2–52.7%) | 8 (4.4–12.8)     | -38.8% (-57.7 to -11.4%)  |
|                                            | Subarachnoid haemorrhage                | 27.4% (16.9–39.5%) | 13.7 (8.3–20.8)      | -20.7% (-48.5 to 30.4%)   | 31.8% (18.8–49.8%) | 0.6 (0.3–0.9)    | -28.2% (-54.9 to 22.4%)   |
|                                            | Neurological disorders*                 | 4.4% (0.8–12.1%)   | 59.6 (10.7–192.1)    | 60% (35.4 to 100.6%)      | 10.3% (2.2–23.8%)  | 3.9 (0.4–14.6)   | 57.7% (28.8 to 106.7%)    |
|                                            | Alzheimer's disease and other dementias | 15.3% (3.8–31%)    | 59.6 (10.7–192.1)    | 60% (35.4 to 100.6%)      | 14.8% (3.6–30.4%)  | 3.9 (0.4–14.6)   | 57.7% (28.8 to 106.7%)    |
| High LDL cholesterol                       | Stroke                                  | 16.4% (8.5–30%)    | 350.1 (174.7–627.8)  | -17.1% (-34.8 to 4.3%)    | 15.3% (5–32.6%)    | 18.7 (6–39.9)    | -14.2% (-34.4 to 9.4%)    |
|                                            | Ischaemic stroke                        | 22% (11.4–40%)     | 350.1 (174.7–627.8)  | -17.1% (-34.8 to 4.3%)    | 19.4% (6.4–41.1%)  | 18.7 (6–39.9)    | -14.2% (-34.4 to 9.4%)    |
| High systolic blood pressure               | Stroke                                  | 46% (36.9–54.7%)   | 979.3 (759.6–1210.4) | -33.3% (-48.8 to -13.4%)  | 42.4% (32.8–52.9%) | 51.9 (38.9–67.1) | -30.4% (-48.5 to -8.6%)   |
|                                            | Ischaemic stroke                        | 44.2% (33.7–54.7%) | 702.6 (515.7–894)    | -17.4% (-36.7 to 7.1%)    | 40.6% (29.5–52.9%) | 39.2 (27.3–53.4) | -15.4% (-37.3 to 12.7%)   |
|                                            | Intracerebral haemorrhage               | 51.6% (41.3–61.7%) | 251.4 (191.6–318)    | -56% (-67.1 to -41.3%)    | 49.2% (37.3–61.1%) | 11.9 (8.4–15.6)  | -55.3% (-66.8 to -40%)    |
|                                            | Subarachnoid haemorrhage                | 50.5% (40.6–59.7%) | 25.3 (18.9–32.8)     | -45.5% (-62.6 to -19.8%)  | 49.3% (38.1–60.9%) | 0.9 (0.6–1.2)    | -49.4% (-66.6 to -20.2%)  |
| High temperature                           | Stroke                                  | 0.4% (-0.3–2.1%)   | 8.7 (-5.3–44.9)      | 8.1% (-649.3 to 627.1%)   | 0.5% (-0.3–2.4%)   | 0.6 (-0.3–2.9)   | 17.7% (-700.7 to 681.5%)  |
|                                            | Ischaemic stroke                        | 0.4% (-0.3–2.1%)   | 6.4 (-3.9–33.5)      | 34% (-767.3 to 805.1%)    | 0.5% (-0.3–2.4%)   | 0.4 (-0.3–2.3)   | 40.2% (-809 to 829.6%)    |
|                                            | Intracerebral haemorrhage               | 0.4% (-0.3–2.3%)   | 2.1 (-1.3–10.4)      | -30.5% (-458.5 to 363.2%) | 0.5% (-0.3–2.4%)   | 0.1 (-0.1–0.5)   | -27.1% (-465.7 to 375.2%) |
|                                            | Subarachnoid haemorrhage                | 0.4% (-0.2–1.9%)   | 0.2 (-0.1–1)         | -17% (-495.6 to 385.2%)   | 0.5% (-0.3–2.4%)   | <0.1 (<0.1–<0.1) | -14.3% (-506.5 to 424.6%) |
| Household air pollution from solid fuels   | Meningitis                              | 0% (0–0%)          | <0.1 (<0.1–<0.1)     | -99.6% (-99.9 to -98.7%)  | 0% (0–0%)          | <0.1 (<0.1–<0.1) | -99.6% (-99.9 to -98.7%)  |
|                                            | Encephalitis                            | 0% (0–0%)          | <0.1 (<0.1–<0.1)     | -97.8% (-99.5 to -90.6%)  | 0% (0–0%)          | <0.1 (<0.1–<0.1) | -97.8% (-99.5 to -90.6%)  |
|                                            | Stroke                                  | 0.4% (0.2–0.7%)    | 7.8 (3.5–15.6)       | -98.2% (-99.2 to -96.1%)  | 0.3% (0.1–0.6%)    | 0.4 (0.2–0.8)    | -98.1% (-99.2 to -96%)    |
|                                            | Ischaemic stroke                        | 0.4% (0.2–0.7%)    | 5.7 (2.6–11.5)       | -97.8% (-99 to -95.3%)    | 0.3% (0.1–0.6%)    | 0.3 (0.1–0.6)    | -97.7% (-99 to -95.2%)    |
|                                            | Intracerebral haemorrhage               | 0.4% (0.2–0.8%)    | 1.9 (0.9–3.8)        | -98.8% (-99.5 to -97.3%)  | 0.3% (0.2–0.7%)    | 0.1 (0–0.2)      | -98.8% (-99.5 to -97.3%)  |
|                                            | Subarachnoid haemorrhage                | 0.4% (0.2–0.9%)    | 0.2 (0.1–0.4)        | -98.5% (-99.4 to -96.4%)  | 0.4% (0.2–0.8%)    | <0.1 (<0.1–<0.1) | -98.6% (-99.5 to -96.6%)  |
| Kidney dysfunction                         | Stroke                                  | 12.7% (9.5–15.5%)  | 269.8 (196–347)      | -9% (-29.2 to 14.8%)      | 11.4% (7.1–15.2%)  | 14 (8.7–19.6)    | -7.2% (-28.9 to 19.4%)    |
|                                            | Ischaemic stroke                        | 13.4% (9.2–17%)    | 213.2 (143.3–282.6)  | 7.6% (-15.6 to 36.2%)     | 11.4% (6.1–16.1%)  | 11 (5.9–16.2)    | 8.4% (-18.1 to 41.5%)     |
|                                            | Intracerebral haemorrhage               | 11.6% (9.1–14.1%)  | 56.6 (41.8–73.4)     | -42.5% (-56.7 to -23.2%)  | 12.6% (9.1–16%)    | 3 (2.1–4.1)      | -38.8% (-53.4 to -19.1%)  |
| Lead exposure                              | Stroke                                  | 3.9% (2.1–5.9%)    | 83.3 (43.5–130.2)    | -47.8% (-60.9 to -32.8%)  | 4.1% (2.3–6.2%)    | 5.1 (2.9–7.9)    | -39.9% (-54.7 to -22.8%)  |
|                                            | Ischaemic stroke                        | 3.9% (2.1–6%)      | 61.9 (32.5–97.1)     | -33.5% (-50.8 to -15%)    | 4% (2.2–6.2%)      | 3.9 (2.1–6.3)    | -25.6% (-43.6 to -4.8%)   |
|                                            | Intracerebral haemorrhage               | 4.1% (1.9–6.5%)    | 19.8 (9.1–33)        | -68.1% (-77.9 to -57.4%)  | 4.6% (2.4–7.3%)    | 1.1 (0.6–1.8)    | -63.5% (-73.5 to -51.4%)  |
|                                            | Subarachnoid haemorrhage                | 3.2% (1.3–5.6%)    | 1.6 (0.6–2.9)        | -63.8% (-77.7 to -46.2%)  | 4.1% (2.6–7%)      | 0.1 (0–0.1)      | -59.7% (-74.6 to -36.8%)  |
| Low birth weight                           | Meningitis                              | 3.5% (2.2–5.2%)    | 1.4 (0.9–2.2)        | -87.9% (-94 to -76.1%)    | 1.8% (1.1–2.7%)    | <0.1 (<0.1–<0.1) | -87.9% (-94 to -76.1%)    |
|                                            | Encephalitis                            | 1.7% (1–2.9%)      | 0.3 (0.2–0.5)        | -31.1% (-70.4 to 54.2%)   | 1.1% (0.6–1.9%)    | <0.1 (<0.1–<0.1) | -31.1% (-70.4 to 54.2%)   |
| Low birth weight and short gestation       | Meningitis                              | 3.9% (2.5–5.7%)    | 1.6 (1–2.4)          | -87.6% (-93.8 to -75.6%)  | 2% (1.2–2.9%)      | <0.1 (<0.1–<0.1) | -87.6% (-93.8 to -75.6%)  |
|                                            | Encephalitis                            | 1.9% (1.1–3.2%)    | 0.3 (0.2–0.5)        | -29.3% (-69.2 to 56.7%)   | 1.2% (0.7–2%)      | <0.1 (<0.1–<0.1) | -29.3% (-69.2 to 56.7%)   |
| Low physical activity                      | Stroke                                  | 5.8% (1.3–12.7%)   | 122.9 (26.5–276.5)   | -12.3% (-30.1 to 12.7%)   | 7.1% (1.6–14.5%)   | 8.7 (2–18.2)     | -10.3% (-29.2 to 16.4%)   |



**Table S16** Regional and national disabilities and deaths related to neurological conditions attributable to risk factors in North Africa and Middle East countries

| Location<br>Risk factor (alphabetic order) | Cause                                   | DALYs (95% UI)     |                        |                          | Deaths (95% UI)    |                   |                          |
|--------------------------------------------|-----------------------------------------|--------------------|------------------------|--------------------------|--------------------|-------------------|--------------------------|
|                                            |                                         | PAF (%)            | Rate per 100,000       | Rate change (%)          | PAF (%)            | Rate per 100,000  | Rate change (%)          |
|                                            |                                         | 2019               | 2019                   | From 1990 to 2019        | 2019               | 2019              | From 1990 to 2019        |
| Low temperature                            | Ischaemic stroke                        | 7.7% (1.7–16.9%)   | 122.9 (26.5–276.5)     | -12.3% (-30.1 to 12.7%)  | 9% (2.1–18.4%)     | 8.7 (2–18.2)      | -10.3% (-29.2 to 16.4%)  |
|                                            | Stroke                                  | 4.8% (0.4–9.6%)    | 101.3 (8.8–206.4)      | -39.4% (-54.7 to -16.3%) | 5.4% (0.5–10.7%)   | 6.6 (0.6–13.3)    | -33.9% (-49.8 to -9.1%)  |
|                                            | Ischaemic stroke                        | 4.7% (0.4–9.4%)    | 74.3 (6.5–150.9)       | -25.2% (-44.7 to 3.5%)   | 5.4% (0.5–10.7%)   | 5.2 (0.5–10.5)    | -21.5% (-41.3 to 5.5%)   |
|                                            | Intracerebral haemorrhage               | 5.1% (0.4–10.2%)   | 24.7 (2.2–51)          | -60.6% (-71.5 to -44.7%) | 5.4% (0.5–10.7%)   | 1.3 (0.1–2.6)     | -58.7% (-69.3 to -42.8%) |
|                                            | Subarachnoid haemorrhage                | 4.3% (0.4–8.8%)    | 2.2 (0.2–4.5)          | -54.1% (-69.5 to -25.4%) | 5.4% (0.5–10.7%)   | 0.1 (0–0.2)       | -52.6% (-69.1 to -23%)   |
| Metabolic risk factors†                    | Stroke                                  | 72.4% (64.4–82%)   | 1541.4 (1292.4–1842.5) | -27.5% (-43.2 to -8.1%)  | 68.5% (58–81.6%)   | 83.8 (67.5–104.9) | -24.2% (-40.8 to -2.2%)  |
|                                            | Ischaemic stroke                        | 72.5% (62.7–85.5%) | 1153.8 (948–1418.5)    | -12.6% (-30.3 to 10.4%)  | 68.1% (55.8–84.9%) | 65.7 (50.9–85)    | -10.2% (-29.5 to 16.4%)  |
|                                            | Intracerebral haemorrhage               | 72.5% (64.1–79.8%) | 353.5 (286.8–428.4)    | -52.8% (-64.3 to -37%)   | 70% (59.9–79.7%)   | 16.9 (13.4–21.1)  | -52.1% (-63.7 to -36.2%) |
|                                            | Subarachnoid haemorrhage                | 67.9% (58.8–75.4%) | 34 (26.9–41.7)         | -41.5% (-58.9 to -13.4%) | 66.1% (55.2–76%)   | 1.2 (0.9–1.5)     | -46% (-64 to -16.3%)     |
|                                            | Neurological disorders*                 | 7.6% (2.3–17.1%)   | 103.5 (29.4–273)       | 45.8% (19.5 to 93.1%)    | 17.6% (6.2–32.6%)  | 6.6 (1.1–20.4)    | 46.5% (14.1 to 107.1%)   |
| Non-optimal temperature                    | Alzheimer's disease and other dementias | 26.6% (11.3–44.9%) | 103.5 (29.4–273)       | 45.8% (19.5 to 93.1%)    | 25.3% (10.1–43.5%) | 6.6 (1.1–20.4)    | 46.5% (14.1 to 107.1%)   |
|                                            | Stroke                                  | 5.2% (1.1–9.7%)    | 109.6 (23.8–208.7)     | -37.3% (-56.2 to -4.2%)  | 5.8% (1.3–11%)     | 7.1 (1.5–13.5)    | -31.6% (-51.9 to 6.8%)   |
|                                            | Ischaemic stroke                        | 5.1% (1.1–9.5%)    | 80.5 (17.3–153.8)      | -22.6% (-46.6 to 18.2%)  | 5.8% (1.3–11%)     | 5.6 (1.2–10.6)    | -18.8% (-43.1 to 26%)    |
|                                            | Intracerebral haemorrhage               | 5.5% (1.2–10.5%)   | 26.8 (5.8–51.3)        | -59.3% (-72.1 to -35.9%) | 5.8% (1.3–11%)     | 1.4 (0.3–2.7)     | -57.2% (-70.6 to -33.2%) |
|                                            | Subarachnoid haemorrhage                | 4.7% (1–8.9%)      | 2.4 (0.5–4.6)          | -52.5% (-70.7 to -13.8%) | 5.8% (1.3–11%)     | 0.1 (0–0.2)       | -50.9% (-70.1 to -12.9%) |
| Other environmental risks                  | Stroke                                  | 3.9% (2.1–5.9%)    | 83.3 (43.5–130.2)      | -47.8% (-60.9 to -32.8%) | 4.1% (2.3–6.2%)    | 5.1 (2.9–7.9)     | -39.9% (-54.7 to -22.8%) |
|                                            | Ischaemic stroke                        | 3.9% (2.1–6%)      | 61.9 (32.5–97.1)       | -33.5% (-50.8 to -15%)   | 4% (2.2–6.2%)      | 3.9 (2.1–6.3)     | -25.6% (-43.6 to -4.8%)  |
|                                            | Intracerebral haemorrhage               | 4.1% (1.9–6.5%)    | 19.8 (9.1–33)          | -68.1% (-77.9 to -57.4%) | 4.6% (2.4–7.3%)    | 1.1 (0.6–1.8)     | -63.5% (-73.5 to -51.4%) |
|                                            | Subarachnoid haemorrhage                | 3.2% (1.3–5.6%)    | 1.6 (0.6–2.9)          | -63.8% (-77.7 to -46.2%) | 4.1% (2.6–7%)      | 0.1 (0–0.1)       | -59.7% (-74.6 to -36.8%) |
|                                            | Meningitis                              | 0.6% (0.2–1.1%)    | 0.2 (0.1–0.5)          | -88.4% (-96 to -66%)     | 0.3% (0.1–0.6%)    | <0.1 (<0.1–<0.1)  | -88.4% (-96 to -66%)     |
| Particulate matter pollution               | Encephalitis                            | 0.3% (0.1–0.6%)    | <0.1 (<0.1–0.1)        | -34.1% (-83.5 to 126.1%) | 0.2% (0.1–0.4%)    | <0.1 (<0.1–<0.1)  | -34.1% (-83.5 to 126.2%) |
|                                            | Stroke                                  | 22.8% (17.5–27.8%) | 485.7 (356.7–612.5)    | -39.6% (-54.1 to -22.2%) | 19.6% (14.9–24%)   | 24 (17.5–30.6)    | -38.2% (-52.6 to -20.4%) |
|                                            | Ischaemic stroke                        | 22% (16.8–26.8%)   | 350.3 (258–442.5)      | -26.1% (-43.3 to -6.5%)  | 19% (14.5–23.3%)   | 18.3 (13.2–23.4)  | -25.8% (-43.2 to -4.7%)  |
|                                            | Intracerebral haemorrhage               | 25% (19.4–30.2%)   | 122 (88–155.9)         | -59.8% (-70.2 to -45.9%) | 21.9% (16.7–26.8%) | 5.3 (3.8–6.8)     | -60.3% (-70.2 to -46.9%) |
|                                            | Subarachnoid haemorrhage                | 26.7% (21–32.2%)   | 13.4 (9.8–17.3)        | -49% (-64.2 to -25.8%)   | 23% (17.8–28%)     | 0.4 (0.3–0.6)     | -54.3% (-69.6 to -28.8%) |
| Secondhand smoke                           | Stroke                                  | 4.1% (3.1–5.1%)    | 87 (62.6–114.2)        | -40.4% (-54.4 to -22.2%) | 3.3% (2.5–4.2%)    | 4 (2.9–5.4)       | -38.6% (-52.7 to -19.7%) |
|                                            | Ischaemic stroke                        | 3.8% (2.8–4.8%)    | 60 (43.1–79.1)         | -26.3% (-43.6 to -4.6%)  | 3.1% (2.3–4%)      | 3 (2.2–4)         | -25.4% (-43 to -3.1%)    |
|                                            | Intracerebral haemorrhage               | 5% (3.7–6.3%)      | 24.1 (17–32.7)         | -59.1% (-70 to -44.5%)   | 4% (3–5.1%)        | 1 (0.7–1.3)       | -59.7% (-70.1 to -45.6%) |
|                                            | Subarachnoid haemorrhage                | 5.6% (4.2–7%)      | 2.8 (2–3.7)            | -49.6% (-65.1 to -23.5%) | 4.6% (3.5–5.8%)    | 0.1 (0.1–0.1)     | -54% (-69.6 to -27.8%)   |
|                                            | Meningitis                              | 2.7% (1.8–4%)      | 1.1 (0.7–1.7)          | -86.4% (-93.1 to -73.4%) | 1.4% (0.9–2.1%)    | <0.1 (<0.1–<0.1)  | -86.4% (-93.1 to -73.4%) |
| Short gestation                            | Encephalitis                            | 1.3% (0.8–2.3%)    | 0.2 (0.1–0.4)          | -22.6% (-66.3 to 73.1%)  | 0.8% (0.5–1.4%)    | <0.1 (<0.1–<0.1)  | -22.6% (-66.3 to 73.1%)  |
|                                            | Stroke                                  | 13.7% (12.3–15.5%) | 292.3 (244.3–347.4)    | -39.2% (-54.6 to -18%)   | 10.2% (9–11.6%)    | 12.5 (10.2–14.9)  | -40.5% (-55.1 to -18.6%) |



**Table S16** Regional and national disabilities and deaths related to neurological conditions attributable to risk factors in North Africa and Middle East countries

| Location<br>Risk factor (alphabetic order) | Cause                                   | DALYs (95% UI)      |                         |                           | Deaths (95% UI)    |                         |                            |
|--------------------------------------------|-----------------------------------------|---------------------|-------------------------|---------------------------|--------------------|-------------------------|----------------------------|
|                                            |                                         | PAF (%)             | Rate per 100,000        | Rate change (%)           | PAF (%)            | Rate per 100,000        | Rate change (%)            |
|                                            |                                         | 2019                | 2019                    | From 1990 to 2019         | 2019               | 2019                    | From 1990 to 2019          |
| Tobacco                                    | Ischaemic stroke                        | 12.7% (11.2–14.3%)  | 201.6 (162.4–240.9)     | -25% (-43.9 to 0.7%)      | 9.4% (8.1–10.6%)   | 9 (7.2–10.8)            | -27.7% (-46.1 to -0.8%)    |
|                                            | Intracerebral haemorrhage               | 17% (15.1–19.6%)    | 83.2 (66.6–103.4)       | -58% (-69.5 to -40.9%)    | 13.3% (11.6–15.5%) | 3.2 (2.5–4)             | -59.9% (-70.7 to -43.8%)   |
|                                            | Subarachnoid haemorrhage                | 15.1% (12.6–17.7%)  | 7.6 (5.6–9.6)           | -44.4% (-63.1 to -12%)    | 12.2% (9.4–14.9%)  | 0.2 (0.1–0.3)           | -51% (-69.6 to -17.8%)     |
|                                            | Neurological disorders*                 | 3.9% (1.2–8.3%)     | 53 (15.4–138)           | -14.8% (-31.8 to 9.4%)    | 7.4% (1.2–13.5%)   | 2.9 (0.2–9.3)           | -20.8% (-46.6 to 14.4%)    |
|                                            | Alzheimer's disease and other dementias | 15.6% (10.1–20.9%)  | 60.6 (23.4–143.4)       | -16.6% (-32.9 to 7%)      | 13.3% (8.3–18.1%)  | 3.5 (0.7–9.9)           | -21.2% (-40.1 to 8%)       |
|                                            | Parkinson's disease                     | -10.9% (-16.1–5.7%) | -10.1 (-15.8–4.8)       | -21.6% (-45.4 to 21.8%)   | -9.2% (-13.9–4.7%) | -0.6 (-0.9–0.3)         | -22.3% (-47.5 to 25.7%)    |
|                                            | Multiple sclerosis                      | 13% (9.6–17.7%)     | 2.5 (1.6–3.8)           | 2.9% (-34.2 to 43%)       | 14.7% (10.7–21%)   | <0.1 (<0.1–0.1)         | -6.6% (-51 to 56%)         |
|                                            | Stroke                                  | 17.2% (15.5–19.2%)  | 367 (306.7–432.3)       | -39.3% (-53.7 to -19.2%)  | 13.1% (11.7–14.7%) | 16.1 (13.3–19)          | -39.8% (-54.2 to -19.4%)   |
|                                            | Ischaemic stroke                        | 15.9% (14.2–17.8%)  | 253.7 (209.3–300.1)     | -25.1% (-43.1 to -1.4%)   | 12.2% (10.7–13.7%) | 11.7 (9.4–14)           | -26.9% (-44.7 to -1.7%)    |
|                                            | Intracerebral haemorrhage               | 21.2% (18.9–23.8%)  | 103.3 (83.5–126.7)      | -58.2% (-69.2 to -42.5%)  | 16.8% (14.8–19%)   | 4 (3.3–4.9)             | -59.8% (-70.1 to -44.4%)   |
|                                            | Subarachnoid haemorrhage                | 19.9% (17.3–22.5%)  | 10 (7.6–12.4)           | -45.8% (-62.7 to -16.8%)  | 16.3% (13.6–19.2%) | 0.3 (0.2–0.4)           | -51.8% (-68.6 to -21.9%)   |
|                                            | Neurological disorders*                 | 3.9% (1.2–8.3%)     | 53 (15.4–138)           | -14.8% (-31.8 to 9.4%)    | 7.4% (1.2–13.5%)   | 2.9 (0.2–9.3)           | -20.8% (-46.6 to 14.4%)    |
|                                            | Alzheimer's disease and other dementias | 15.6% (10.1–20.9%)  | 60.6 (23.4–143.4)       | -16.6% (-32.9 to 7%)      | 13.3% (8.3–18.1%)  | 3.5 (0.7–9.9)           | -21.2% (-40.1 to 8%)       |
| Parkinson's disease                        | -10.9% (-16.1–5.7%)                     | -10.1 (-15.8–4.8)   | -21.6% (-45.4 to 21.8%) | -9.2% (-13.9–4.7%)        | -0.6 (-0.9–0.3)    | -22.3% (-47.5 to 25.7%) |                            |
| Multiple sclerosis                         | 13% (9.6–17.7%)                         | 2.5 (1.6–3.8)       | 2.9% (-34.2 to 43%)     | 14.7% (10.7–21%)          | <0.1 (<0.1–0.1)    | -6.6% (-51 to 56%)      |                            |
| <b>Oman</b>                                |                                         |                     |                         |                           |                    |                         |                            |
| Air pollution                              | Meningitis                              | 0.8% (0.3–1.6%)     | 0.2 (0.1–0.4)           | -84.3% (-94.5 to -60.3%)  | 0.2% (0.1–0.5%)    | <0.1 (<0.1–<0.1)        | -84.3% (-94.5 to -60.3%)   |
|                                            | Encephalitis                            | 0.4% (0.2–0.8%)     | 0.5 (0.2–1)             | -49.1% (-85.2 to 57%)     | 0.2% (0.1–0.3%)    | <0.1 (<0.1–<0.1)        | -49.1% (-85.2 to 57%)      |
|                                            | Stroke                                  | 27.5% (21.3–33%)    | 517.8 (390.5–652.4)     | -47.3% (-59.8 to -29.8%)  | 24.6% (19–29.9%)   | 25.5 (19.1–32.5)        | -40.9% (-55.5 to -18.9%)   |
|                                            | Ischaemic stroke                        | 27% (20.8–32.7%)    | 348.1 (263.9–443.2)     | -30.3% (-46.9 to -6.6%)   | 23.8% (18.5–29.1%) | 18.2 (13.5–23.7)        | -22.8% (-43.8 to 6.6%)     |
|                                            | Intracerebral haemorrhage               | 28.9% (22.8–34.8%)  | 146 (109.7–192.1)       | -65.4% (-74.2 to -52.5%)  | 26.7% (20.8–32.3%) | 6.4 (4.8–8.5)           | -63% (-72.7 to -48.7%)     |
|                                            | Subarachnoid haemorrhage                | 26.5% (20.4–32.6%)  | 23.7 (14.2–39.9)        | -61.6% (-77 to -26.4%)    | 26.7% (20.8–32.4%) | 0.8 (0.4–1.4)           | -62.1% (-80 to -25.2%)     |
| Alcohol use                                | Stroke                                  | 0% (-0.2–0.3%)      | 0.4 (-4.2–5.3)          | -82.9% (-661.9 to 391.3%) | 0% (-0.2–0.2%)     | 0 (-0.2–0.2)            | -280.6% (-584.6 to 980.3%) |
|                                            | Ischaemic stroke                        | -0.2% (-0.4–0.1%)   | -2.2 (-5.9–1.6)         | -20.6% (-150.7 to 164%)   | -0.2% (-0.4–0.1%)  | -0.1 (-0.3–0)           | -4.7% (-149.8 to 138.6%)   |
|                                            | Intracerebral haemorrhage               | 0.5% (0.1–1%)       | 2.5 (0.4–5.3)           | -48.5% (-77.8 to 40.5%)   | 0.3% (0–0.7%)      | 0.1 (0–0.2)             | -48% (-78 to 62.1%)        |
|                                            | Neurological disorders*                 | 0.1% (0–0.3%)       | 1.5 (0.4–3.3)           | 26.3% (-57.8 to 272.4%)   | 0% (0–0%)          | <0.1 (<0.1–<0.1)        | -18.3% (-52.9 to 61.4%)    |
|                                            | Idiopathic epilepsy                     | 1.4% (0.6–2.3%)     | 1.5 (0.4–3.3)           | 26.3% (-57.8 to 272.4%)   | 1.6% (0.7–2.7%)    | <0.1 (<0.1–<0.1)        | -18.3% (-52.9 to 61.4%)    |
| All risk factors                           | Meningitis                              | 4.2% (2.4–7.4%)     | 1 (0.5–1.9)             | -83.3% (-91.7 to -64.3%)  | 1.2% (0.6–2.4%)    | <0.1 (<0.1–<0.1)        | -83.3% (-91.7 to -64.3%)   |
|                                            | Encephalitis                            | 2% (1–3.7%)         | 2.5 (1.2–4.4)           | -43.8% (-76.9 to 36.5%)   | 0.9% (0.4–1.6%)    | <0.1 (<0.1–0.1)         | -43.8% (-76.9 to 36.5%)    |
|                                            | Stroke                                  | 85.4% (81.1–90.1%)  | 1610.3 (1402.6–1845.1)  | -33.1% (-48 to -12.1%)    | 84.6% (78.5–91.2%) | 87.7 (74.8–102.8)       | -23.1% (-41.6 to 4.8%)     |
|                                            | Ischaemic stroke                        | 86.8% (81.3–92.9%)  | 1120.3 (948–1304.7)     | -13% (-31.3 to 15.5%)     | 84.7% (77.3–93.4%) | 64.9 (52.4–77.8)        | -1.4% (-26.3 to 34.6%)     |

**Table S16** Regional and national disabilities and deaths related to neurological conditions attributable to risk factors in North Africa and Middle East countries

| Location<br>Risk factor (alphabetic order) | Cause                                   | DALYs (95% UI)     |                     |                          | Deaths (95% UI)    |                  |                          |
|--------------------------------------------|-----------------------------------------|--------------------|---------------------|--------------------------|--------------------|------------------|--------------------------|
|                                            |                                         | PAF (%)            | Rate per 100,000    | Rate change (%)          | PAF (%)            | Rate per 100,000 | Rate change (%)          |
|                                            |                                         | 2019               | 2019                | From 1990 to 2019        | 2019               | 2019             | From 1990 to 2019        |
| Ambient particulate matter pollution       | Intracerebral haemorrhage               | 84.3% (80–88.8%)   | 425.1 (364–534.7)   | -56.1% (-67.6 to -40.3%) | 84.8% (78.8–90.5%) | 20.4 (17–26.4)   | -52.6% (-65 to -33.7%)   |
|                                            | Subarachnoid haemorrhage                | 72.4% (64.4–80.9%) | 64.9 (41.4–103.2)   | -54.1% (-72.2 to -13.7%) | 79.6% (73.4–85.9%) | 2.5 (1.4–4)      | -52.5% (-74.9 to -8.7%)  |
|                                            | Neurological disorders*                 | 11.6% (4.5–23.9%)  | 155.2 (52.5–394.6)  | 53.4% (23 to 113.9%)     | 23.2% (9.4–38.4%)  | 9.9 (1.7–30.2)   | 60.8% (24.3 to 160%)     |
|                                            | Alzheimer's disease and other dementias | 37.2% (22.8–53.8%) | 157.3 (55.5–397.3)  | 51.2% (21.2 to 108.3%)   | 35.2% (21–51.9%)   | 10.2 (2–30.4)    | 58.6% (21.9 to 150%)     |
|                                            | Parkinson's disease                     | -3.9% (-5.9–2.1%)  | -4.9 (-7.6–2.3)     | -9.3% (-41.2 to 40%)     | -3.6% (-5.5–1.9%)  | -0.3 (-0.5–0.1)  | 6.6% (-33.6 to 71.1%)    |
|                                            | Idiopathic epilepsy                     | 1.4% (0.6–2.3%)    | 1.5 (0.4–3.3)       | 26.3% (-57.8 to 272.4%)  | 1.6% (0.7–2.7%)    | <0.1 (<0.1–<0.1) | -18.3% (-52.9 to 61.4%)  |
|                                            | Multiple sclerosis                      | 7.9% (5.6–10.6%)   | 1.3 (0.8–1.9)       | -0.3% (-40 to 37.9%)     | 7.7% (4.8–10.9%)   | <0.1 (<0.1–<0.1) | -10% (-63.3 to 52.6%)    |
|                                            | Meningitis                              | 0.8% (0.3–1.6%)    | 0.2 (0.1–0.4)       | -65.7% (-89 to 2.4%)     | 0.2% (0.1–0.5%)    | <0.1 (<0.1–<0.1) | -65.7% (-89 to 2.3%)     |
|                                            | Encephalitis                            | 0.4% (0.2–0.8%)    | 0.5 (0.2–1)         | 11.6% (-67.6 to 303.7%)  | 0.2% (0.1–0.3%)    | <0.1 (<0.1–<0.1) | 11.6% (-67.6 to 303.7%)  |
|                                            | Stroke                                  | 27.4% (21.2–32.9%) | 515.7 (388.7–651.2) | 2.1% (-30.9 to 69.8%)    | 24.5% (18.9–29.8%) | 25.4 (19–32.5)   | 15.4% (-22.3 to 99%)     |
| Behavioural risk factors‡                  | Ischaemic stroke                        | 26.8% (20.7–32.5%) | 346.7 (262.4–442)   | 32.4% (-8.8 to 121.9%)   | 23.7% (18.4–29%)   | 18.2 (13.4–23.6) | 47.9% (-0.9 to 154%)     |
|                                            | Intracerebral haemorrhage               | 28.8% (22.7–34.7%) | 145.4 (108.4–191.7) | -31.4% (-54.9 to 19.9%)  | 26.6% (20.7–32.2%) | 6.4 (4.7–8.5)    | -25.8% (-51.3 to 30.3%)  |
|                                            | Subarachnoid haemorrhage                | 26.4% (20.3–32.5%) | 23.6 (14.1–39.8)    | -24.7% (-58.7 to 55.7%)  | 26.6% (20.6–32.3%) | 0.8 (0.4–1.4)    | -24.9% (-62.5 to 62.5%)  |
|                                            | Meningitis                              | 4.1% (2.2–7%)      | 1 (0.5–1.9)         | -83% (-91.4 to -64%)     | 1.2% (0.6–2.2%)    | <0.1 (<0.1–<0.1) | -83% (-91.4 to -64%)     |
|                                            | Encephalitis                            | 1.9% (1–3.6%)      | 2.4 (1.1–4.3)       | -42.6% (-76.3 to 39.3%)  | 0.8% (0.4–1.5%)    | <0.1 (<0.1–<0.1) | -42.6% (-76.3 to 39.3%)  |
|                                            | Stroke                                  | 26.9% (21.6–32.7%) | 507.3 (394.1–645.6) | -46.1% (-59 to -27.9%)   | 25.1% (19.3–31.8%) | 26 (19.2–34.5)   | -36.9% (-53.3 to -14.3%) |
|                                            | Ischaemic stroke                        | 29.2% (21.9–36.9%) | 377.1 (274.5–493.2) | -29.8% (-46.2 to -6.6%)  | 27.1% (19.3–35.2%) | 20.7 (14.5–28.4) | -19.1% (-39.4 to 10.3%)  |
|                                            | Intracerebral haemorrhage               | 22.1% (16.6–27.5%) | 111.3 (80.2–154)    | -68.4% (-76.7 to -55.8%) | 19.5% (14.3–24.8%) | 4.7 (3.3–6.6)    | -66.2% (-75.4 to -53.1%) |
|                                            | Subarachnoid haemorrhage                | 21.2% (16.3–26.9%) | 19 (11.2–32.6)      | -64.2% (-78.2 to -28.9%) | 20.3% (15.4–26%)   | 0.6 (0.3–1.1)    | -65% (-81.1 to -28.8%)   |
|                                            | Neurological disorders*                 | 2.4% (0.8–5%)      | 32.4 (10–78.7)      | -21.1% (-38.7 to 4.5%)   | 3.7% (0.4–7.2%)    | 1.7 (0.1–5.3)    | -23% (-63.1 to 16%)      |
| Child and maternal malnutrition            | Alzheimer's disease and other dementias | 8.2% (4.9–11.8%)   | 34.5 (12.7–81.7)    | -21.6% (-37.8 to 3.2%)   | 6.8% (4–10%)       | 2 (0.4–5.6)      | -19.5% (-39.5 to 16.6%)  |
|                                            | Parkinson's disease                     | -3.9% (-5.9–2.1%)  | -4.9 (-7.6–2.3)     | -9.3% (-41.2 to 40%)     | -3.6% (-5.5–1.9%)  | -0.3 (-0.5–0.1)  | 6.6% (-33.6 to 71.1%)    |
|                                            | Idiopathic epilepsy                     | 1.4% (0.6–2.3%)    | 1.5 (0.4–3.3)       | 26.3% (-57.8 to 272.4%)  | 1.6% (0.7–2.7%)    | <0.1 (<0.1–<0.1) | -18.3% (-52.9 to 61.4%)  |
|                                            | Multiple sclerosis                      | 7.9% (5.6–10.6%)   | 1.3 (0.8–1.9)       | -0.3% (-40 to 37.9%)     | 7.7% (4.8–10.9%)   | <0.1 (<0.1–<0.1) | -10% (-63.3 to 52.6%)    |
|                                            | Meningitis                              | 4.1% (2.2–7%)      | 1 (0.5–1.9)         | -83% (-91.4 to -64%)     | 1.2% (0.6–2.2%)    | <0.1 (<0.1–<0.1) | -83% (-91.4 to -64%)     |
|                                            | Encephalitis                            | 1.9% (1–3.6%)      | 2.4 (1.1–4.3)       | -42.6% (-76.3 to 39.3%)  | 0.8% (0.4–1.5%)    | <0.1 (<0.1–<0.1) | -42.6% (-76.3 to 39.3%)  |
|                                            | Stroke                                  | 5.9% (3–8.2%)      | 112.1 (56.9–157.9)  | -31% (-50.1 to 1.6%)     | 4.7% (2.2–6.6%)    | 4.9 (2.3–7.1)    | -23.4% (-46 to 12.7%)    |
|                                            | Ischaemic stroke                        | 5.3% (1.6–7.6%)    | 69 (22.1–101.2)     | -6.3% (-29.9 to 43.5%)   | 4.1% (1.2–6%)      | 3.2 (0.9–4.8)    | 4.2% (-22.9 to 62.3%)    |
|                                            | Intracerebral haemorrhage               | 7.3% (2.4–10.6%)   | 36.7 (12–56.3)      | -52.3% (-65.4 to -21.1%) | 6.3% (2–9.3%)      | 1.5 (0.4–2.3)    | -48.9% (-62.9 to -15.9%) |
|                                            | Subarachnoid haemorrhage                | 7.2% (2.6–10.6%)   | 6.4 (2.1–11.9)      | -46.4% (-67.8 to 11.5%)  | 6.6% (2.1–9.7%)    | 0.2 (0.1–0.4)    | -47.4% (-72 to 11.8%)    |
| Diet high in red meat                      | Stroke                                  | 1.8% (0.2–7.2%)    | 33.4 (4.6–136.8)    | -40.9% (-63.6 to 20.5%)  | 1.5% (0.3–6.2%)    | 1.6 (0.3–6.6)    | -34.2% (-60.5 to 34%)    |

**Table S16** Regional and national disabilities and deaths related to neurological conditions attributable to risk factors in North Africa and Middle East countries

| Location<br>Risk factor (alphabetic order) | Cause                     | DALYs (95% UI)     |                     |                          | Deaths (95% UI)    |                  |                          |
|--------------------------------------------|---------------------------|--------------------|---------------------|--------------------------|--------------------|------------------|--------------------------|
|                                            |                           | PAF (%)            | Rate per 100,000    | Rate change (%)          | PAF (%)            | Rate per 100,000 | Rate change (%)          |
|                                            |                           | 2019               | 2019                | From 1990 to 2019        | 2019               | 2019             | From 1990 to 2019        |
| Diet low in fibre                          | Ischaemic stroke          | 1.7% (0.2–7%)      | 22.3 (3.2–95.1)     | -23% (-52.7 to 57.6%)    | 1.4% (0.3–5.9%)    | 1.1 (0.2–4.8)    | -15.1% (-49.9 to 75.6%)  |
|                                            | Intracerebral haemorrhage | 1.9% (0.2–7.5%)    | 9.5 (1.2–38.2)      | -60.4% (-77.8 to -19.2%) | 1.7% (0.3–6.9%)    | 0.4 (0.1–1.7)    | -57.5% (-76 to -13%)     |
|                                            | Subarachnoid haemorrhage  | 1.8% (0.2–7%)      | 1.6 (0.1–7)         | -55% (-78.3 to 1.8%)     | 1.8% (0.2–7.2%)    | 0.1 (0–0.3)      | -55.7% (-80.3 to 0.2%)   |
|                                            | Stroke                    | 1.4% (0.3–2.8%)    | 25.8 (6.2–54.7)     | -74.3% (-82 to -61%)     | 1.3% (0.3–2.7%)    | 1.3 (0.3–2.7)    | -69.6% (-79.4 to -53.1%) |
|                                            | Ischaemic stroke          | 1.3% (0.3–2.7%)    | 17.2 (4.4–36.4)     | -65.2% (-75.8 to -48.8%) | 1.3% (0.3–2.6%)    | 1 (0.2–2)        | -58.9% (-72.9 to -36.3%) |
| Diet low in fruits                         | Intracerebral haemorrhage | 1.4% (0.3–3.1%)    | 7.2 (1.7–16.6)      | -83.5% (-88.7 to -74.8%) | 1.4% (0.3–2.9%)    | 0.3 (0.1–0.8)    | -81.7% (-87.8 to -70.5%) |
|                                            | Subarachnoid haemorrhage  | 1.5% (0.3–3.2%)    | 1.3 (0.2–3.2)       | -81.2% (-89.3 to -63.5%) | 1.4% (0.3–3.1%)    | <0.1 (<0.1–0.1)  | -81.4% (-90.4 to -64.1%) |
|                                            | Stroke                    | 1.9% (0.9–3%)      | 35.2 (17.3–57.8)    | -65.4% (-76.3 to -50.7%) | 1.6% (0.8–2.6%)    | 1.6 (0.8–2.7)    | -60.6% (-73.9 to -41.6%) |
|                                            | Ischaemic stroke          | 1.4% (0.4–2.8%)    | 18.7 (4.8–36.5)     | -49.5% (-64 to -21.8%)   | 1.2% (0.3–2.4%)    | 0.9 (0.3–1.9)    | -41.5% (-61.8 to -6%)    |
|                                            | Intracerebral haemorrhage | 2.8% (1.3–4.5%)    | 13.9 (6.4–23.9)     | -75.1% (-82.5 to -64.4%) | 2.5% (1.2–4.1%)    | 0.6 (0.3–1)      | -73.2% (-81.9 to -60%)   |
| Diet low in vegetables                     | Subarachnoid haemorrhage  | 2.9% (1.4–5.1%)    | 2.6 (1–5.2)         | -70.6% (-82.2 to -45.8%) | 2.6% (1.2–4.4%)    | 0.1 (0–0.2)      | -72% (-85.4 to -47.1%)   |
|                                            | Stroke                    | 1.5% (0.4–2.9%)    | 28.6 (6.9–55.6)     | -54% (-70.6 to -28.1%)   | 1.4% (0.4–2.6%)    | 1.4 (0.4–2.7)    | -49.5% (-68.5 to -19.6%) |
|                                            | Ischaemic stroke          | 1.4% (0.2–2.8%)    | 18.4 (2.7–36.9)     | -35.8% (-54.7 to -11.4%) | 1.3% (0.2–2.5%)    | 1 (0.2–2)        | -29.2% (-52.9 to 1.3%)   |
|                                            | Intracerebral haemorrhage | 1.7% (0.2–5.1%)    | 8.8 (1–25.4)        | -70.1% (-81.1 to -56.1%) | 1.7% (0.2–4.9%)    | 0.4 (0–1.1)      | -68.7% (-80.8 to -52.1%) |
|                                            | Subarachnoid haemorrhage  | 1.6% (0.2–4.8%)    | 1.4 (0.1–4.6)       | -66.8% (-83.3 to -37.6%) | 1.7% (0.2–4.9%)    | 0.1 (0–0.2)      | -67.6% (-85.1 to -38.3%) |
| Diet low in whole grains                   | Stroke                    | 3.3% (0.8–4.8%)    | 61.5 (15.1–93)      | -30.4% (-47.7 to -7.8%)  | 3% (0.8–4.4%)      | 3.1 (0.8–4.8)    | -21.5% (-42.5 to 6.5%)   |
|                                            | Ischaemic stroke          | 4.8% (1.2–7%)      | 61.5 (15.1–93)      | -30.4% (-47.7 to -7.8%)  | 4.1% (1–6%)        | 3.1 (0.8–4.8)    | -21.5% (-42.5 to 6.5%)   |
|                                            | Stroke                    | 14.6% (10.5–19.4%) | 275.4 (191.6–378.4) | -47.2% (-60.1 to -29.1%) | 12.8% (9–16.9%)    | 13.2 (9.1–18.4)  | -41% (-56.8 to -19.8%)   |
| Dietary risks                              | Ischaemic stroke          | 14.9% (9.6–19.8%)  | 191.8 (120.4–265.7) | -31% (-47.4 to -8.7%)    | 12.7% (8.3–17.2%)  | 9.7 (6.2–13.8)   | -23.4% (-43.3 to 4.9%)   |
|                                            | Intracerebral haemorrhage | 14.1% (8.2–20.2%)  | 71.2 (40.5–105.9)   | -66.3% (-75.5 to -52.7%) | 12.8% (7.3–18.7%)  | 3.1 (1.7–4.7)    | -64.2% (-74.5 to -49.4%) |
|                                            | Subarachnoid haemorrhage  | 13.8% (8.4–19.9%)  | 12.4 (6.3–21.7)     | -61.9% (-76.9 to -25.2%) | 13.2% (7.7–19%)    | 0.4 (0.2–0.8)    | -63% (-80.5 to -25.5%)   |
|                                            | Meningitis                | 0.8% (0.3–1.6%)    | 0.2 (0.1–0.4)       | -84.3% (-94.5 to -60.3%) | 0.2% (0.1–0.5%)    | <0.1 (<0.1–<0.1) | -84.3% (-94.5 to -60.3%) |
|                                            | Encephalitis              | 0.4% (0.2–0.8%)    | 0.5 (0.2–1)         | -49.1% (-85.2 to 57%)    | 0.2% (0.1–0.3%)    | <0.1 (<0.1–<0.1) | -49.1% (-85.2 to 57%)    |
| Environmental/occupational risk factors§   | Stroke                    | 35.2% (27.5–42.2%) | 662.8 (509.7–843.8) | -46% (-59.3 to -25.6%)   | 33.5% (25.2–41.3%) | 34.8 (25.7–45.3) | -37.6% (-54.5 to -13.1%) |
|                                            | Ischaemic stroke          | 34.6% (27–41.8%)   | 447 (336.1–565.1)   | -28.1% (-45.6 to -1.1%)  | 32.8% (24.6–40.7%) | 25.1 (17.9–32.9) | -18.4% (-41 to 14.4%)    |
|                                            | Intracerebral haemorrhage | 36.8% (28.7–44.4%) | 185.5 (138.9–244.7) | -64.6% (-73.6 to -49.8%) | 35.5% (26.8–43.2%) | 8.5 (6.2–11.4)   | -61.4% (-71.9 to -44.9%) |
|                                            | Subarachnoid haemorrhage  | 33.8% (26.2–42.1%) | 30.2 (18.1–50.1)    | -62.6% (-77.8 to -27.6%) | 35.3% (26.9–43.2%) | 1.1 (0.6–1.8)    | -61.2% (-79.5 to -24.3%) |
|                                            | Stroke                    | 31.6% (22.1–40.7%) | 595.5 (401.5–804.2) | -1.4% (-31.5 to 55.7%)   | 21.6% (14–29.8%)   | 22.4 (14.1–31.8) | 13.1% (-25.9 to 84.3%)   |
|                                            | Ischaemic stroke          | 26% (17.6–35%)     | 335.2 (211.4–468.7) | 59.6% (6.4 to 165.8%)    | 17.5% (10.4–25.8%) | 13.4 (7.8–20.1)  | 82.2% (15.1 to 223.2%)   |
|                                            | Intracerebral haemorrhage | 43.9% (32.3–54.6%) | 221.2 (154.5–300.2) | -34.7% (-55.8 to 3%)     | 33% (22.2–44.5%)   | 7.9 (5.2–11.3)   | -27.7% (-51.8 to 18.1%)  |
|                                            | Subarachnoid haemorrhage  | 43.8% (32.8–54.5%) | 39.1 (22.6–65.9)    | -29% (-57.8 to 37.3%)    | 36.1% (25.1–47.5%) | 1.1 (0.5–2)      | -27% (-61.4 to 48.9%)    |
|                                            | Neurological disorders*   | 6.6% (2–14.8%)     | 88.3 (24.5–226.5)   | 164.2% (82 to 416.8%)    | 13.7% (4.7–26.2%)  | 5.8 (1–17.6)     | 174.2% (75.1 to 501.8%)  |

**Table S16** Regional and national disabilities and deaths related to neurological conditions attributable to risk factors in North Africa and Middle East countries

| Location<br>Risk factor (alphabetic order) | Cause                                   | DALYs (95% UI)     |                      |                          | Deaths (95% UI)    |                  |                          |
|--------------------------------------------|-----------------------------------------|--------------------|----------------------|--------------------------|--------------------|------------------|--------------------------|
|                                            |                                         | PAF (%)            | Rate per 100,000     | Rate change (%)          | PAF (%)            | Rate per 100,000 | Rate change (%)          |
|                                            |                                         | 2019               | 2019                 | From 1990 to 2019        | 2019               | 2019             | From 1990 to 2019        |
| High fasting plasma glucose                | Alzheimer's disease and other dementias | 20.9% (9.2–35.9%)  | 88.3 (24.5–226.5)    | 164.2% (82 to 416.8%)    | 20% (8.6–34.7%)    | 5.8 (1–17.6)     | 174.2% (75.1 to 501.8%)  |
|                                            | Stroke                                  | 31.8% (19.5–51.3%) | 600.6 (370.3–978.1)  | 15.7% (-20.5 to 73.4%)   | 32% (18.1–59.6%)   | 33.2 (18.5–61.5) | 28.5% (-16.6 to 95.7%)   |
|                                            | Ischaemic stroke                        | 33.5% (17–62.5%)   | 433.2 (214.3–799.7)  | 49.8% (4.6 to 120.5%)    | 32.4% (15.1–69%)   | 24.9 (11.2–53)   | 64.9% (8.3 to 148.9%)    |
|                                            | Intracerebral haemorrhage               | 29.4% (18–42.9%)   | 148.2 (87.6–221)     | -27.3% (-49.2 to 10%)    | 31.2% (17.7–49.1%) | 7.5 (4.2–12.3)   | -22.3% (-46.9 to 18.8%)  |
|                                            | Subarachnoid haemorrhage                | 21.3% (13–30.9%)   | 19.2 (9–33.4)        | -26.7% (-59.4 to 38.4%)  | 28% (16.7–43.3%)   | 0.9 (0.4–1.6)    | -23.4% (-61 to 48.3%)    |
|                                            | Neurological disorders*                 | 4.3% (0.8–11.6%)   | 57.6 (10.3–187.2)    | 59.6% (36.1 to 117.3%)   | 9% (1.9–21.4%)     | 3.8 (0.4–14.3)   | 59.1% (29.4 to 146.2%)   |
| High LDL cholesterol                       | Alzheimer's disease and other dementias | 13.6% (3.3–28.2%)  | 57.6 (10.3–187.2)    | 59.6% (36.1 to 117.3%)   | 13.1% (3.2–27.6%)  | 3.8 (0.4–14.3)   | 59.1% (29.4 to 146.2%)   |
|                                            | Stroke                                  | 16% (7.8–29.3%)    | 302.4 (146.3–570.7)  | -12% (-36.5 to 17.2%)    | 15.6% (4.9–32.8%)  | 16.1 (5–36)      | 1.9% (-30.5 to 40%)      |
| High systolic blood pressure               | Ischaemic stroke                        | 23.4% (11.4–42.7%) | 302.4 (146.3–570.7)  | -12% (-36.5 to 17.2%)    | 21.1% (6.6–44.6%)  | 16.1 (5–36)      | 1.9% (-30.5 to 40%)      |
|                                            | Stroke                                  | 52.3% (43.2–60.6%) | 986.4 (779.1–1209.1) | -18.2% (-38.9 to 14%)    | 49.1% (39–59.4%)   | 50.9 (38.8–64.5) | -6.9% (-33 to 32.5%)     |
| High temperature                           | Ischaemic stroke                        | 50.6% (39.5–60.8%) | 652.8 (493–821.8)    | 10.2% (-19 to 52.7%)     | 46.5% (34.2–59.9%) | 35.6 (25.4–47.6) | 24.1% (-13.2 to 78.1%)   |
|                                            | Intracerebral haemorrhage               | 57.4% (46.9–66.9%) | 289.4 (225.4–373.9)  | -46.2% (-61 to -22.5%)   | 56.9% (43.6–69.1%) | 13.7 (10–18.2)   | -41.1% (-58.7 to -13.9%) |
|                                            | Subarachnoid haemorrhage                | 49.2% (40.4–59.9%) | 44.3 (26.3–71.3)     | -41.5% (-65.4 to 12%)    | 54.5% (43.6–65.6%) | 1.7 (0.9–2.9)    | -40.1% (-68.9 to 18.5%)  |
|                                            | Stroke                                  | 5.1% (1.6–11.6%)   | 96.5 (29.4–212.3)    | -39.9% (-81.8 to -13.4%) | 5.9% (1.9–13.2%)   | 6.1 (1.9–13.3)   | -26.9% (-77.1 to 2.9%)   |
|                                            | Ischaemic stroke                        | 5% (1.6–11.2%)     | 64.1 (20.1–141.1)    | -18.5% (-75.2 to 17.1%)  | 5.9% (1.9–13.2%)   | 4.5 (1.4–9.9)    | -5.4% (-71.6 to 35.5%)   |
|                                            | Intracerebral haemorrhage               | 5.5% (1.8–12.4%)   | 27.8 (8.8–62)        | -59.8% (-87.3 to -39.8%) | 5.9% (1.9–13.2%)   | 1.4 (0.4–3.2)    | -55.3% (-86.3 to -31.9%) |
| Household air pollution from solid fuels   | Subarachnoid haemorrhage                | 5.3% (1.7–11.7%)   | 4.7 (1.3–10.8)       | -63.6% (-88.8 to -19.6%) | 5.9% (1.9–13.2%)   | 0.2 (0–0.4)      | -57.2% (-86.8 to -11.2%) |
|                                            | Meningitis                              | 0% (0–0%)          | <0.1 (<0.1–<0.1)     | -99.9% (-100 to -99.5%)  | 0% (0–0%)          | <0.1 (<0.1–<0.1) | -99.9% (-100 to -99.5%)  |
|                                            | Encephalitis                            | 0% (0–0%)          | <0.1 (<0.1–<0.1)     | -99.5% (-99.9 to -98.1%) | 0% (0–0%)          | <0.1 (<0.1–<0.1) | -99.5% (-99.9 to -98.1%) |
|                                            | Stroke                                  | 0.1% (0–0.3%)      | 2 (0.5–5.3)          | -99.6% (-99.9 to -98.8%) | 0.1% (0–0.2%)      | 0.1 (0–0.3)      | -99.5% (-99.9 to -98.6%) |
|                                            | Ischaemic stroke                        | 0.1% (0–0.3%)      | 1.3 (0.3–3.4)        | -99.4% (-99.8 to -98.4%) | 0.1% (0–0.2%)      | 0.1 (0–0.2)      | -99.4% (-99.8 to -98.2%) |
|                                            | Intracerebral haemorrhage               | 0.1% (0–0.3%)      | 0.6 (0.2–1.5)        | -99.7% (-99.9 to -99.2%) | 0.1% (0–0.3%)      | <0.1 (<0.1–0.1)  | -99.7% (-99.9 to -99.1%) |
| Kidney dysfunction                         | Subarachnoid haemorrhage                | 0.1% (0–0.3%)      | 0.1 (0–0.3)          | -99.7% (-99.9 to -99%)   | 0.1% (0–0.3%)      | <0.1 (<0.1–<0.1) | -99.7% (-99.9 to -99%)   |
|                                            | Stroke                                  | 11.9% (8.9–14.4%)  | 224 (163.8–287.1)    | -4% (-27.2 to 30.1%)     | 11.4% (7.5–14.9%)  | 11.8 (7.6–16.2)  | 5.5% (-23.6 to 46.4%)    |
|                                            | Ischaemic stroke                        | 13% (9.1–16.5%)    | 167.7 (113.9–224.1)  | 20.7% (-9.7 to 61.9%)    | 11.5% (6.3–15.9%)  | 8.8 (4.8–12.9)   | 31.4% (-7.8 to 81.2%)    |
| Lead exposure                              | Intracerebral haemorrhage               | 11.2% (8.7–13.7%)  | 56.3 (40.9–74.2)     | -40.5% (-56.4 to -15.6%) | 12.6% (9–16%)      | 3 (2–4.2)        | -32.8% (-51 to -5.8%)    |
|                                            | Stroke                                  | 3.1% (1.4–4.9%)    | 57.7 (25.6–94)       | -55.4% (-69.1 to -39.8%) | 3.3% (1.6–5.2%)    | 3.4 (1.6–5.4)    | -42.1% (-58.8 to -20.6%) |
|                                            | Ischaemic stroke                        | 3.1% (1.5–5.2%)    | 40.7 (18.4–67.9)     | -37.3% (-55.6 to -14.2%) | 3.2% (1.6–5.3%)    | 2.5 (1.2–4.2)    | -21% (-44.5 to 9.6%)     |
|                                            | Intracerebral haemorrhage               | 3% (1.1–5.2%)      | 15 (5.5–27)          | -73.4% (-83.3 to -61.8%) | 3.4% (1.5–5.9%)    | 0.8 (0.3–1.5)    | -66% (-77 to -52%)       |
|                                            | Subarachnoid haemorrhage                | 2.2% (0.7–4.2%)    | 2 (0.5–4.7)          | -74.7% (-87.9 to -52.8%) | 3.1% (1.2–5.4%)    | 0.1 (0–0.2)      | -67.5% (-84.3 to -37.1%) |
| Low birth weight                           | Meningitis                              | 3.7% (2–6.5%)      | 0.9 (0.5–1.7)        | -83.4% (-91.8 to -64.5%) | 1.1% (0.6–2.1%)    | <0.1 (<0.1–<0.1) | -83.4% (-91.8 to -64.5%) |

**Table S16** Regional and national disabilities and deaths related to neurological conditions attributable to risk factors in North Africa and Middle East countries

| Location<br>Risk factor (alphabetic order) |                                         | DALYs (95% UI)     |                        |                           | Deaths (95% UI)    |                  |                           |
|--------------------------------------------|-----------------------------------------|--------------------|------------------------|---------------------------|--------------------|------------------|---------------------------|
|                                            |                                         | PAF (%)            | Rate per 100,000       | Rate change (%)           | PAF (%)            | Rate per 100,000 | Rate change (%)           |
| Cause                                      |                                         | 2019               | 2019                   | From 1990 to 2019         | 2019               | 2019             | From 1990 to 2019         |
| Low birth weight and short gestation       | Encephalitis                            | 1.8% (0.9–3.3%)    | 2.2 (1–4)              | -44% (-77.4 to 39.3%)     | 0.8% (0.4–1.4%)    | <0.1 (<0.1–<0.1) | -44% (-77.4 to 39.3%)     |
|                                            | Meningitis                              | 4.1% (2.2–7%)      | 1 (0.5–1.9)            | -83% (-91.4 to -64%)      | 1.2% (0.6–2.2%)    | <0.1 (<0.1–<0.1) | -83% (-91.4 to -64%)      |
| Low physical activity                      | Encephalitis                            | 1.9% (1.3–6%)      | 2.4 (1.1–4.3)          | -42.6% (-76.3 to 39.3%)   | 0.8% (0.4–1.5%)    | <0.1 (<0.1–<0.1) | -42.6% (-76.3 to 39.3%)   |
|                                            | Stroke                                  | 6% (1.3–12.6%)     | 113.3 (24.8–235.8)     | 4.9% (-21.8 to 54.9%)     | 7.5% (1.7–14.6%)   | 7.7 (1.7–15.3)   | 15.1% (-14.7 to 71.7%)    |
| Low temperature                            | Ischaemic stroke                        | 8.8% (1.9–18.2%)   | 113.3 (24.8–235.8)     | 4.9% (-21.8 to 54.9%)     | 10.1% (2.3–19.8%)  | 7.7 (1.7–15.3)   | 15.1% (-14.7 to 71.7%)    |
|                                            | Stroke                                  | 2.8% (-4.8–7%)     | 52.6 (-73.8–163.7)     | -41.4% (-160.3 to 426.2%) | 3.2% (-4.5–10%)    | 3.3 (-4.7–10.5)  | -28.7% (-172.9 to 518.4%) |
| Metabolic risk factors†                    | Ischaemic stroke                        | 2.7% (-3.9–8.5%)   | 35.1 (-48.7–109.2)     | -20.4% (-182.4 to 611.7%) | 3.2% (-4.5–10%)    | 2.5 (-3.4–7.7)   | -7.5% (-193.1 to 697.4%)  |
|                                            | Intracerebral haemorrhage               | 3% (-4.3–9.4%)     | 15 (-23–47.5)          | -61.1% (-142.7 to 265.3%) | 3.2% (-4.5–10%)    | 0.8 (-1.2–2.4)   | -56.7% (-147.9 to 290.3%) |
|                                            | Subarachnoid haemorrhage                | 2.9% (-4.1–9.1%)   | 2.5 (-3.8–8.9)         | -64.9% (-133.4 to 200.2%) | 3.2% (-4.5–10%)    | 0.1 (-0.1–0.4)   | -58.6% (-134.3 to 249.7%) |
|                                            | Stroke                                  | 74.9% (67.3–82.9%) | 1410.9 (1186.6–1652.5) | -21.1% (-38.9 to 6.1%)    | 72.3% (62.2–84%)   | 75 (60.8–91.5)   | -9.5% (-32.1 to 25.2%)    |
|                                            | Ischaemic stroke                        | 75.6% (65.8–87.2%) | 977 (791.7–1175.5)     | 0.9% (-21.6 to 35.6%)     | 71.8% (58.7–87.2%) | 55 (41.8–69.8)   | 14.9% (-14.6 to 58.7%)    |
|                                            | Intracerebral haemorrhage               | 74.9% (67.9–81.2%) | 378 (317.5–476.9)      | -47.8% (-61.3 to -26.3%)  | 74.6% (65–83.3%)   | 17.9 (14.5–23.3) | -43.1% (-58.6 to -18.5%)  |
| Non-optimal temperature                    | Subarachnoid haemorrhage                | 62.4% (53.5–72.2%) | 56 (34.3–87.8)         | -42.2% (-65.6 to 6.2%)    | 68.3% (58.8–77.2%) | 2.1 (1.2–3.4)    | -41.3% (-69.1 to 13.2%)   |
|                                            | Neurological disorders*                 | 10% (3.5–21.4%)    | 133.9 (39.3–348.1)     | 100.6% (55.5 to 222.5%)   | 20.9% (8.2–36.1%)  | 8.8 (1.6–27.3)   | 103.8% (50.6 to 268.2%)   |
|                                            | Alzheimer's disease and other dementias | 31.6% (16.4–49.7%) | 133.9 (39.3–348.1)     | 100.6% (55.5 to 222.5%)   | 30.4% (15.3–48.3%) | 8.8 (1.6–27.3)   | 103.8% (50.6 to 268.2%)   |
|                                            | Stroke                                  | 7.8% (-0.2–14.7%)  | 146.2 (-3.6–292.9)     | -40.4% (-93.4 to 31.2%)   | 8.9% (-0.2–16.9%)  | 9.2 (-0.2–18.7)  | -27.5% (-92.2 to 61.5%)   |
|                                            | Ischaemic stroke                        | 7.5% (-0.2–14.2%)  | 97.2 (-2.3–194.2)      | -19.2% (-91.4 to 74.2%)   | 8.9% (-0.2–16.9%)  | 6.8 (-0.2–13.6)  | -6.1% (-90.1 to 104.1%)   |
|                                            | Intracerebral haemorrhage               | 8.3% (-0.2–15.8%)  | 41.9 (-1–84.3)         | -60.2% (-95.7 to -17.3%)  | 8.9% (-0.2–16.9%)  | 2.1 (-0.1–4.2)   | -55.8% (-95.3 to -6.4%)   |
| Other environmental risks                  | Subarachnoid haemorrhage                | 8% (-0.2–15.5%)    | 7.1 (-0.2–16.6)        | -64% (-95.8 to -13.1%)    | 8.9% (-0.2–16.9%)  | 0.3 (0–0.7)      | -57.7% (-95 to -2.2%)     |
|                                            | Stroke                                  | 3.1% (1.4–4.9%)    | 57.7 (25.6–94)         | -55.4% (-69.1 to -39.8%)  | 3.3% (1.6–5.2%)    | 3.4 (1.6–5.4)    | -42.1% (-58.8 to -20.6%)  |
|                                            | Ischaemic stroke                        | 3.1% (1.5–5.2%)    | 40.7 (18.4–67.9)       | -37.3% (-55.6 to -14.2%)  | 3.2% (1.6–5.3%)    | 2.5 (1.2–4.2)    | -21% (-44.5 to 9.6%)      |
|                                            | Intracerebral haemorrhage               | 3% (1.1–5.2%)      | 15 (5.5–27)            | -73.4% (-83.3 to -61.8%)  | 3.4% (1.5–5.9%)    | 0.8 (0.3–1.5)    | -66% (-77 to -52%)        |
| Particulate matter pollution               | Subarachnoid haemorrhage                | 2.2% (0.7–4.2%)    | 2 (0.5–4.7)            | -74.7% (-87.9 to -52.8%)  | 3.1% (1.2–5.4%)    | 0.1 (0–0.2)      | -67.5% (-84.3 to -37.1%)  |
|                                            | Meningitis                              | 0.8% (0.3–1.6%)    | 0.2 (0.1–0.4)          | -84.3% (-94.5 to -60.3%)  | 0.2% (0.1–0.5%)    | <0.1 (<0.1–<0.1) | -84.3% (-94.5 to -60.3%)  |
|                                            | Encephalitis                            | 0.4% (0.2–0.8%)    | 0.5 (0.2–1)            | -49.1% (-85.2 to 57%)     | 0.2% (0.1–0.3%)    | <0.1 (<0.1–<0.1) | -49.1% (-85.2 to 57%)     |
|                                            | Stroke                                  | 27.5% (21.3–33%)   | 517.8 (390.5–652.4)    | -47.3% (-59.8 to -29.8%)  | 24.6% (19–29.9%)   | 25.5 (19.1–32.5) | -40.9% (-55.5 to -18.9%)  |
|                                            | Ischaemic stroke                        | 27% (20.8–32.7%)   | 348.1 (263.9–443.2)    | -30.3% (-46.9 to -6.6%)   | 23.8% (18.5–29.1%) | 18.2 (13.5–23.7) | -22.8% (-43.8 to 6.6%)    |
|                                            | Intracerebral haemorrhage               | 28.9% (22.8–34.8%) | 146 (109.7–192.1)      | -65.4% (-74.2 to -52.5%)  | 26.7% (20.8–32.3%) | 6.4 (4.8–8.5)    | -63% (-72.7 to -48.7%)    |
| Secondhand smoke                           | Subarachnoid haemorrhage                | 26.5% (20.4–32.6%) | 23.7 (14.2–39.9)       | -61.6% (-77 to -26.4%)    | 26.7% (20.8–32.4%) | 0.8 (0.4–1.4)    | -62.1% (-80 to -25.2%)    |
|                                            | Stroke                                  | 2.6% (1.9–3.3%)    | 48.3 (34.6–64.6)       | -44.4% (-58.6 to -23.2%)  | 2.3% (1.7–3%)      | 2.4 (1.7–3.3)    | -36.4% (-53 to -10.9%)    |
|                                            | Ischaemic stroke                        | 2.4% (1.7–3.2%)    | 31.1 (21.7–42.2)       | -24.3% (-44.3 to 3.4%)    | 2.2% (1.6–2.9%)    | 1.7 (1.2–2.4)    | -15.3% (-38.7 to 19.5%)   |
|                                            | Intracerebral haemorrhage               | 2.9% (2.1–3.8%)    | 14.8 (10.6–20.3)       | -62.9% (-73.2 to -47.5%)  | 2.6% (1.9–3.4%)    | 0.6 (0.4–0.9)    | -60.2% (-71.4 to -43.2%)  |

**Table S16** Regional and national disabilities and deaths related to neurological conditions attributable to risk factors in North Africa and Middle East countries

| Location<br>Risk factor (alphabetic order) | Cause                                   | DALYs (95% UI)     |                     |                           | Deaths (95% UI)    |                  |                          |
|--------------------------------------------|-----------------------------------------|--------------------|---------------------|---------------------------|--------------------|------------------|--------------------------|
|                                            |                                         | PAF (%)            | Rate per 100,000    | Rate change (%)           | PAF (%)            | Rate per 100,000 | Rate change (%)          |
|                                            |                                         | 2019               | 2019                | From 1990 to 2019         | 2019               | 2019             | From 1990 to 2019        |
| Short gestation                            | Subarachnoid haemorrhage                | 2.7% (1.9–3.5%)    | 2.4 (1.3–4.1)       | -59.1% (-75.7 to -20.6%)  | 2.7% (2–3.5%)      | 0.1 (0–0.1)      | -58.9% (-78.1 to -20.3%) |
|                                            | Meningitis                              | 3.1% (1.7–5.3%)    | 0.8 (0.4–1.4)       | -79.1% (-89.5 to -55.3%)  | 0.9% (0.5–1.7%)    | <0.1 (<0.1–<0.1) | -79.1% (-89.5 to -55.3%) |
|                                            | Encephalitis                            | 1.4% (0.7–2.7%)    | 1.8 (0.8–3.2)       | -28.3% (-69.8 to 68.3%)   | 0.6% (0.3–1.1%)    | <0.1 (<0.1–<0.1) | -28.3% (-69.8 to 68.3%)  |
| Smoking                                    | Stroke                                  | 6.9% (6–8%)        | 129.7 (106.9–160.6) | -63.5% (-73.8 to -47.9%)  | 5.2% (4.4–6.1%)    | 5.4 (4.4–6.6)    | -59.5% (-71.5 to -41.6%) |
|                                            | Ischaemic stroke                        | 7% (6.1–8.1%)      | 90.7 (74.2–110.1)   | -53.7% (-67.3 to -34.2%)  | 5.2% (4.4–6%)      | 4 (3.1–4.9)      | -48.8% (-64.6 to -25.1%) |
|                                            | Intracerebral haemorrhage               | 6.5% (5.3–8%)      | 33 (25.5–46.3)      | -76.2% (-83.6 to -63.9%)  | 5.1% (4.1–6.3%)    | 1.2 (1–1.8)      | -74.7% (-82.8 to -62.3%) |
| Tobacco                                    | Subarachnoid haemorrhage                | 6.8% (5.3–8.9%)    | 6.1 (3.9–11.6)      | -71.3% (-83.7 to -38.9%)  | 6.1% (4.5–8%)      | 0.2 (0.1–0.4)    | -72.4% (-85.8 to -39.2%) |
|                                            | Neurological disorders*                 | 2.3% (0.7–5%)      | 30.9 (8.5–76.9)     | -22.5% (-39.9 to 1.7%)    | 3.7% (0.4–7.2%)    | 1.7 (0.1–5.3)    | -23% (-63.8 to 15.9%)    |
|                                            | Alzheimer's disease and other dementias | 8.2% (4.9–11.8%)   | 34.5 (12.7–81.7)    | -21.6% (-37.8 to 3.2%)    | 6.8% (4–10%)       | 2 (0.4–5.6)      | -19.5% (-39.5 to 16.6%)  |
|                                            | Parkinson's disease                     | -3.9% (-5.9–2.1%)  | -4.9 (-7.6–2.3)     | -9.3% (-41.2 to 40%)      | -3.6% (-5.5–1.9%)  | -0.3 (-0.5–0.1)  | 6.6% (-33.6 to 71.1%)    |
|                                            | Multiple sclerosis                      | 7.9% (5.6–10.6%)   | 1.3 (0.8–1.9)       | -0.3% (-40 to 37.9%)      | 7.7% (4.8–10.9%)   | <0.1 (<0.1–<0.1) | -10% (-63.3 to 52.6%)    |
|                                            | Stroke                                  | 9.2% (8.1–10.5%)   | 174.1 (144.5–213.1) | -59.6% (-70.3 to -43.4%)  | 7.4% (6.4–8.5%)    | 7.6 (6.2–9.3)    | -54.2% (-66.6 to -35.7%) |
|                                            | Ischaemic stroke                        | 9.2% (8.1–10.4%)   | 119.2 (97.9–143.3)  | -48.4% (-62.3 to -27.8%)  | 7.3% (6.2–8.3%)    | 5.6 (4.4–6.8)    | -41.7% (-58.1 to -16%)   |
|                                            | Intracerebral haemorrhage               | 9.2% (8–10.8%)     | 46.7 (37.5–62.9)    | -73.1% (-80.9 to -61.3%)  | 7.6% (6.5–9%)      | 1.8 (1.5–2.5)    | -71% (-79.4 to -58.4%)   |
|                                            | Subarachnoid haemorrhage                | 9.3% (7.7–11.6%)   | 8.3 (5.3–15.2)      | -68.6% (-81.8 to -34.8%)  | 8.6% (6.9–10.6%)   | 0.3 (0.1–0.5)    | -69.2% (-83.9 to -34.7%) |
|                                            | Neurological disorders*                 | 2.3% (0.7–5%)      | 30.9 (8.5–76.9)     | -22.5% (-39.9 to 1.7%)    | 3.7% (0.4–7.2%)    | 1.7 (0.1–5.3)    | -23% (-63.8 to 15.9%)    |
| Qatar                                      | Alzheimer's disease and other dementias | 8.2% (4.9–11.8%)   | 34.5 (12.7–81.7)    | -21.6% (-37.8 to 3.2%)    | 6.8% (4–10%)       | 2 (0.4–5.6)      | -19.5% (-39.5 to 16.6%)  |
|                                            | Parkinson's disease                     | -3.9% (-5.9–2.1%)  | -4.9 (-7.6–2.3)     | -9.3% (-41.2 to 40%)      | -3.6% (-5.5–1.9%)  | -0.3 (-0.5–0.1)  | 6.6% (-33.6 to 71.1%)    |
| Air pollution                              | Multiple sclerosis                      | 7.9% (5.6–10.6%)   | 1.3 (0.8–1.9)       | -0.3% (-40 to 37.9%)      | 7.7% (4.8–10.9%)   | <0.1 (<0.1–<0.1) | -10% (-63.3 to 52.6%)    |
|                                            | Meningitis                              | 0.8% (0.5–1.4%)    | 0.2 (0.1–0.4)       | -85% (-93.1 to -67.7%)    | 0.4% (0.2–0.7%)    | <0.1 (<0.1–<0.1) | -85% (-93.1 to -67.7%)   |
|                                            | Encephalitis                            | 0.4% (0.2–0.7%)    | 0.1 (0–0.1)         | -41.4% (-77 to 37%)       | 0.2% (0.1–0.3%)    | <0.1 (<0.1–<0.1) | -41.5% (-77 to 37%)      |
|                                            | Stroke                                  | 34.4% (30.7–37.7%) | 311.4 (248–397.1)   | -47.6% (-59.5 to -32.5%)  | 29.2% (25.9–32.5%) | 15.5 (11.9–20.7) | -41.7% (-57.7 to -21.6%) |
|                                            | Ischaemic stroke                        | 32.5% (28.7–35.9%) | 187.7 (150.1–237.5) | -39.3% (-52.9 to -23.6%)  | 27.8% (24.4–31.2%) | 10.2 (7.9–13.7)  | -33.5% (-51.6 to -10.4%) |
|                                            | Intracerebral haemorrhage               | 37% (32.9–40.3%)   | 90.2 (70.3–119.3)   | -57.9% (-69.4 to -43%)    | 31.9% (28.3–35.3%) | 4 (3.1–5.5)      | -53.3% (-66.8 to -34.4%) |
|                                            | Subarachnoid haemorrhage                | 40.1% (35.6–43.7%) | 33.5 (24.6–44.2)    | -53.2% (-72.4 to -24.7%)  | 34.8% (30.8–38.6%) | 1.2 (0.9–1.6)    | -52.8% (-73.5 to -15.6%) |
|                                            | Stroke                                  | 0.3% (-0.1–0.7%)   | 2.5 (-0.8–6.3)      | -74.3% (-116.5 to -43.5%) | 0.1% (-0.2–0.3%)   | 0 (-0.1–0.2)     | -83.9% (-269.6 to 11%)   |
|                                            | Ischaemic stroke                        | -0.1% (-0.5–0.2%)  | -0.8 (-3.1–1.4)     | 50.8% (-379.6 to 392.6%)  | -0.2% (-0.5–0.1%)  | -0.1 (-0.2–0)    | -21.3% (-290 to 289.2%)  |
|                                            | Intracerebral haemorrhage               | 1.4% (0.5–2.4%)    | 3.3 (1.1–6.1)       | -67.5% (-83.7 to -46.2%)  | 0.8% (0.2–1.6%)    | 0.1 (0–0.2)      | -67.2% (-85.7 to -42.9%) |
| Alcohol use                                | Neurological disorders*                 | 0.2% (0.1–0.5%)    | 3.1 (1–6.7)         | -40.8% (-79.2 to 69.9%)   | 0% (0–0.1%)        | <0.1 (<0.1–<0.1) | -51.6% (-69.1 to -21.1%) |
|                                            | Idiopathic epilepsy                     | 2.5% (1.4–3.8%)    | 3.1 (1–6.7)         | -40.8% (-79.2 to 69.9%)   | 2.5% (1.4–3.8%)    | <0.1 (<0.1–<0.1) | -51.6% (-69.1 to -21.1%) |



**Table S16** Regional and national disabilities and deaths related to neurological conditions attributable to risk factors in North Africa and Middle East countries

| Location<br>Risk factor (alphabetic order) | Cause                                   | DALYs (95% UI)     |                     |                          | Deaths (95% UI)          |                  |                          |
|--------------------------------------------|-----------------------------------------|--------------------|---------------------|--------------------------|--------------------------|------------------|--------------------------|
|                                            |                                         | PAF (%)            | Rate per 100,000    | Rate change (%)          | PAF (%)                  | Rate per 100,000 | Rate change (%)          |
|                                            |                                         | 2019               | 2019                | From 1990 to 2019        | 2019                     | 2019             | From 1990 to 2019        |
| All risk factors                           | Meningitis                              | 3.4% (2.2–5.2%)    | 0.9 (0.6–1.3)       | -84.9% (-92.6 to -71.1%) | 1.7% (1.2–6%)            | <0.1 (<0.1–<0.1) | -84.9% (-92.6 to -71.1%) |
|                                            | Encephalitis                            | 1.6% (0.8–2.5%)    | 0.2 (0.1–0.4)       | -41.6% (-76.8 to 31.2%)  | 0.7% (0.4–1.3%)          | <0.1 (<0.1–<0.1) | -41.6% (-76.8 to 31.2%)  |
|                                            | Stroke                                  | 86.5% (82.3–90.5%) | 782.5 (640.1–988.2) | -44.3% (-57.4 to -28.6%) | 84.3% (78.1–90.7%)       | 44.6 (35.3–57.7) | -37% (-54.1 to -16.6%)   |
|                                            | Ischaemic stroke                        | 86.4% (80.5–92.4%) | 498.8 (405.5–624.4) | -35.9% (-50.1 to -20%)   | 84% (76–92.4%)           | 31 (24.2–41)     | -29.1% (-48.3 to -5.7%)  |
|                                            | Intracerebral haemorrhage               | 86.8% (82.5–90.6%) | 211.6 (166.8–276.7) | -55.6% (-67.6 to -40.5%) | 85% (78.3–91.1%)         | 10.7 (8.1–14.2)  | -49.5% (-64.3 to -29.7%) |
|                                            | Subarachnoid haemorrhage                | 86.2% (81.8–89.9%) | 72.1 (53.6–94.6)    | -52.2% (-71.5 to -22.9%) | 84.4% (77.4–90.3%)       | 2.9 (2.1–4.1)    | -50.8% (-72 to -12.5%)   |
|                                            | Neurological disorders*                 | 15.8% (6.2–31.4%)  | 213.7 (75.8–551.9)  | 36.4% (7.6 to 77.8%)     | 31.2% (12.3–51.8%)       | 13.8 (2.4–42.6)  | 45.8% (5.8 to 109.5%)    |
|                                            | Alzheimer's disease and other dementias | 53.5% (34.4–71.6%) | 218 (82.1–556.1)    | 37% (7.5 to 77.7%)       | 51.6% (32.3–70.3%)       | 14.4 (3.2–43.5)  | 45.1% (6.8 to 104.5%)    |
|                                            | Parkinson's disease                     | -6.2% (-9.4–3.2%)  | -9.1 (-15.3–4.5)    | 1.3% (-32.7 to 50.8%)    | -5.5% (-8.5–2.8%)        | -0.6 (-1–0.3)    | 25% (-19.8 to 91.6%)     |
|                                            | Idiopathic epilepsy                     | 2.5% (1.4–3.8%)    | 3.1 (1.6–7)         | -40.8% (-79.2 to 69.9%)  | 2.5% (1.4–3.8%)          | <0.1 (<0.1–<0.1) | -51.6% (-69.1 to -21.1%) |
|                                            | Multiple sclerosis                      | 9.8% (7–12.7%)     | 1.6 (1.2–4)         | 34.6% (-2.4 to 80.1%)    | 9.7% (6.7–13.2%)         | <0.1 (<0.1–<0.1) | -18% (-58.3 to 36.4%)    |
|                                            | Ambient particulate matter pollution    | Meningitis         | 0.8% (0.5–1.4%)     | 0.2 (0.1–0.4)            | -84.9% (-93.1 to -67.5%) | 0.4% (0.2–0.7%)  | <0.1 (<0.1–<0.1)         |
| Encephalitis                               |                                         | 0.4% (0.2–0.7%)    | 0.1 (0–0.1)         | -41.2% (-76.9 to 37.3%)  | 0.2% (0.1–0.3%)          | <0.1 (<0.1–<0.1) | -41.2% (-76.9 to 37.3%)  |
| Stroke                                     |                                         | 34.4% (30.7–37.7%) | 311.4 (248–397)     | -47.4% (-59.4 to -32.2%) | 29.2% (25.9–32.5%)       | 15.5 (11.9–20.7) | -41.5% (-57.6 to -21.2%) |
| Ischaemic stroke                           |                                         | 32.5% (28.7–35.9%) | 187.7 (150.1–237.5) | -39% (-52.7 to -23.3%)   | 27.8% (24.4–31.2%)       | 10.2 (7.9–13.7)  | -33.2% (-51.5 to -9.9%)  |
| Intracerebral haemorrhage                  |                                         | 37% (32.9–40.3%)   | 90.2 (70.3–119.3)   | -57.7% (-69.3 to -42.8%) | 31.9% (28.3–35.3%)       | 4 (3.1–5.5)      | -53.1% (-66.7 to -34.2%) |
| Subarachnoid haemorrhage                   |                                         | 40% (35.6–43.7%)   | 33.5 (24.6–44.2)    | -53% (-72.3 to -24.4%)   | 34.8% (30.8–38.6%)       | 1.2 (0.9–1.6)    | -52.6% (-73.4 to -15.3%) |
| Behavioural risk factors‡                  | Meningitis                              | 3.3% (2.1–5%)      | 0.8 (0.5–1.3)       | -84.8% (-92.5 to -70.8%) | 1.6% (1.2–5%)            | <0.1 (<0.1–<0.1) | -84.8% (-92.5 to -70.8%) |
|                                            | Encephalitis                            | 1.5% (0.8–2.4%)    | 0.2 (0.1–0.4)       | -41.1% (-76.5 to 32.8%)  | 0.7% (0.3–1.3%)          | <0.1 (<0.1–<0.1) | -41.1% (-76.5 to 32.8%)  |
|                                            | Stroke                                  | 27.4% (22.2–33.4%) | 247.8 (179.5–327.6) | -47.9% (-60.7 to -33.5%) | 23.8% (17.8–30.6%)       | 12.6 (8.5–17.7)  | -40.4% (-57.6 to -20.5%) |
|                                            | Ischaemic stroke                        | 28.9% (21.4–37.3%) | 167.1 (115.5–234.2) | -39.6% (-53.6 to -24.5%) | 25.9% (17.7–34.6%)       | 9.6 (6.2–14.1)   | -32.1% (-51.1 to -8.9%)  |
|                                            | Intracerebral haemorrhage               | 24.2% (19.3–29.9%) | 58.9 (41.7–81.3)    | -61% (-72.8 to -46.6%)   | 18.6% (14.1–24%)         | 2.3 (1.6–3.3)    | -57.5% (-71 to -39.5%)   |
|                                            | Subarachnoid haemorrhage                | 26% (20.7–32.4%)   | 21.8 (14.6–29.9)    | -54.9% (-74.6 to -26.5%) | 20.2% (15.4–26.3%)       | 0.7 (0.5–1)      | -54.8% (-75.9 to -20.1%) |
|                                            | Neurological disorders*                 | 4.2% (1.5–8.8%)    | 56.5 (17–141.4)     | 40.3% (3.3 to 85.9%)     | 6.6% (0.5–12.9%)         | 3.1 (0.1–10.3)   | 77.7% (-1.1 to 249.2%)   |
|                                            | Alzheimer's disease and other dementias | 15% (9–21%)        | 60.9 (22.1–145.6)   | 42.2% (4.6 to 85.2%)     | 13.1% (7.8–18.9%)        | 3.7 (0.8–10.9)   | 68.1% (17.4 to 134.8%)   |
|                                            | Parkinson's disease                     | -6.2% (-9.4–3.2%)  | -9.1 (-15.3–4.5)    | 1.3% (-32.7 to 50.8%)    | -5.5% (-8.5–2.8%)        | -0.6 (-1–0.3)    | 25% (-19.8 to 91.6%)     |
|                                            | Idiopathic epilepsy                     | 2.5% (1.4–3.8%)    | 3.1 (1.6–7)         | -40.8% (-79.2 to 69.9%)  | 2.5% (1.4–3.8%)          | <0.1 (<0.1–<0.1) | -51.6% (-69.1 to -21.1%) |
|                                            | Multiple sclerosis                      | 9.8% (7–12.7%)     | 1.6 (1.2–4)         | 34.6% (-2.4 to 80.1%)    | 9.7% (6.7–13.2%)         | <0.1 (<0.1–<0.1) | -18% (-58.3 to 36.4%)    |
|                                            | Child and maternal malnutrition         | Meningitis         | 3.3% (2.1–5%)       | 0.8 (0.5–1.3)            | -84.8% (-92.5 to -70.8%) | 1.6% (1.2–5%)    | <0.1 (<0.1–<0.1)         |
| Encephalitis                               |                                         | 1.5% (0.8–2.4%)    | 0.2 (0.1–0.4)       | -41.1% (-76.5 to 32.8%)  | 0.7% (0.3–1.3%)          | <0.1 (<0.1–<0.1) | -41.1% (-76.5 to 32.8%)  |
| Diet high in red meat                      | Stroke                                  | 5.4% (2.6–7.5%)    | 48.6 (23.2–71.8)    | -47.4% (-62.3 to -29.3%) | 3.9% (1.8–5.7%)          | 2.1 (0.9–3.3)    | -42.3% (-61.4 to -17.5%) |



**Table S16** Regional and national disabilities and deaths related to neurological conditions attributable to risk factors in North Africa and Middle East countries

| Location<br>Risk factor (alphabetic order) | Cause                     | DALYs (95% UI)     |                     |                          | Deaths (95% UI)    |                  |                          |
|--------------------------------------------|---------------------------|--------------------|---------------------|--------------------------|--------------------|------------------|--------------------------|
|                                            |                           | PAF (%)            | Rate per 100,000    | Rate change (%)          | PAF (%)            | Rate per 100,000 | Rate change (%)          |
|                                            |                           | 2019               | 2019                | From 1990 to 2019        | 2019               | 2019             | From 1990 to 2019        |
| Diet high in sodium                        | Ischaemic stroke          | 4.5% (1.3–6.7%)    | 26.1 (7.2–41.4)     | -38.1% (-55 to -17.8%)   | 3.3% (0.9–5.1%)    | 1.2 (0.3–2)      | -32.6% (-55.7 to -1.6%)  |
|                                            | Intracerebral haemorrhage | 6.6% (2.1–10.1%)   | 16.1 (4.7–26.8)     | -56.7% (-69.5 to -37%)   | 5.2% (1.5–8.1%)    | 0.7 (0.2–1.1)    | -52.3% (-67.6 to -29.9%) |
|                                            | Subarachnoid haemorrhage  | 7.6% (2.3–11.6%)   | 6.4 (1.8–10.5)      | -51.2% (-71.8 to -17.1%) | 5.9% (1.7–9.2%)    | 0.2 (0.1–0.3)    | -51.6% (-73.4 to -12.7%) |
|                                            | Stroke                    | 1.9% (0.3–7.3%)    | 17 (2.2–65.9)       | -46% (-66 to -4%)        | 1.5% (0.3–5.7%)    | 0.8 (0.1–3.1)    | -39.3% (-65.5 to 15.8%)  |
|                                            | Ischaemic stroke          | 1.6% (0.2–6.3%)    | 9.5 (1.4–36.6)      | -37.9% (-61.5 to 11.6%)  | 1.3% (0.3–5.2%)    | 0.5 (0.1–2)      | -30% (-60.5 to 34.5%)    |
| Diet low in fibre                          | Intracerebral haemorrhage | 2.3% (0.3–8.8%)    | 5.5 (0.6–22.2)      | -55.1% (-73.4 to -17.9%) | 1.9% (0.3–7.5%)    | 0.2 (0–1)        | -50.1% (-72.4 to -3.9%)  |
|                                            | Subarachnoid haemorrhage  | 2.4% (0.3–9.2%)    | 2 (0.2–8.2)         | -49.5% (-75.7 to 5.8%)   | 2% (0.3–8%)        | 0.1 (0–0.3)      | -48.9% (-76.8 to 10.7%)  |
|                                            | Stroke                    | 0.3% (0.2–0.6%)    | 2.8 (1.7–5.2)       | -61.5% (-77 to -33.4%)   | 0.3% (0.2–0.6%)    | 0.2 (0.1–0.3)    | -54.2% (-74.4 to -16.1%) |
|                                            | Ischaemic stroke          | 0.3% (0.2–0.6%)    | 1.8 (1.1–3.3)       | -54.2% (-72 to -24.5%)   | 0.3% (0.2–0.6%)    | 0.1 (0.1–0.2)    | -47.3% (-71.9 to -4.1%)  |
| Diet low in fruits                         | Intracerebral haemorrhage | 0.3% (0.2–0.6%)    | 0.8 (0.5–1.5)       | -69.9% (-82.5 to -46.8%) | 0.3% (0.2–0.6%)    | <0.1 (<0.1–0.1)  | -64% (-80.4 to -33.1%)   |
|                                            | Subarachnoid haemorrhage  | 0.3% (0.2–0.7%)    | 0.3 (0.1–0.6)       | -68.9% (-85.1 to -33.6%) | 0.3% (0.2–0.6%)    | <0.1 (<0.1–<0.1) | -66.1% (-83.1 to -25.5%) |
|                                            | Stroke                    | 1.2% (0.6–2.1%)    | 10.8 (5.2–19.3)     | -62.8% (-78.3 to -36.6%) | 0.9% (0.4–1.6%)    | 0.5 (0.2–0.9)    | -60.1% (-80.2 to -23%)   |
|                                            | Ischaemic stroke          | 0.9% (0.3–1.8%)    | 4.9 (1.7–10.4)      | -54.6% (-73.6 to -21.1%) | 0.7% (0.3–1.5%)    | 0.2 (0.1–0.5)    | -51.6% (-77.5 to 0.9%)   |
| Diet low in vegetables                     | Intracerebral haemorrhage | 1.7% (0.8–3%)      | 4.1 (1.7–7.6)       | -68.9% (-83.3 to -44.9%) | 1.3% (0.6–2.4%)    | 0.2 (0.1–0.3)    | -66.8% (-83.1 to -36.3%) |
|                                            | Subarachnoid haemorrhage  | 2.1% (0.9–3.7%)    | 1.7 (0.7–3.2)       | -64.6% (-82.7 to -30.3%) | 1.5% (0.7–2.8%)    | 0.1 (0–0.1)      | -66.3% (-84.5 to -28.7%) |
|                                            | Stroke                    | 0.2% (0.2–0.4%)    | 2.2 (1.6–3.6)       | -68.2% (-83.4 to -40%)   | 0.3% (0.2–0.4%)    | 0.1 (0.1–0.2)    | -63.1% (-81.6 to -28.6%) |
|                                            | Ischaemic stroke          | 0.3% (0.2–0.4%)    | 1.4 (1–2.4)         | -62.2% (-79 to -28.2%)   | 0.3% (0.2–0.4%)    | 0.1 (0.1–0.2)    | -57.3% (-77.9 to -17.8%) |
| Diet low in whole grains                   | Intracerebral haemorrhage | 0.2% (0.2–0.4%)    | 0.6 (0.4–1.1)       | -75.6% (-89.4 to -46.1%) | 0.3% (0.2–0.5%)    | <0.1 (<0.1–0.1)  | -71.7% (-87.9 to -36.1%) |
|                                            | Subarachnoid haemorrhage  | 0.2% (0.2–0.5%)    | 0.2 (0.1–0.4)       | -74.8% (-90.7 to -34.2%) | 0.3% (0.2–0.5%)    | <0.1 (<0.1–<0.1) | -73.1% (-90.1 to -23.4%) |
|                                            | Stroke                    | 3.5% (1.1–5%)      | 31.6 (9.3–47.8)     | -43.8% (-58.3 to -30.2%) | 3.2% (1.1–4.5%)    | 1.7 (0.5–2.6)    | -38% (-56.9 to -17.3%)   |
|                                            | Ischaemic stroke          | 5.5% (1.7–7.7%)    | 31.6 (9.3–47.8)     | -43.8% (-58.3 to -30.2%) | 4.6% (1.5–6.5%)    | 1.7 (0.5–2.6)    | -38% (-56.9 to -17.3%)   |
| Dietary risks                              | Stroke                    | 11.9% (7.9–17.1%)  | 107.2 (65.9–161.1)  | -49.2% (-61.9 to -34.5%) | 9.7% (6.4–13.9%)   | 5.1 (3.1–8)      | -43.7% (-60.8 to -23.9%) |
|                                            | Ischaemic stroke          | 12.3% (7.3–17.2%)  | 71.1 (40.1–103.3)   | -42.6% (-56.2 to -28.1%) | 10.1% (5.9–14.1%)  | 3.7 (2–5.6)      | -37.1% (-56.3 to -14.6%) |
|                                            | Intracerebral haemorrhage | 10.7% (5–17.3%)    | 26 (11.9–44.4)      | -59.7% (-72.4 to -45%)   | 8.7% (4–14.6%)     | 1.1 (0.5–1.9)    | -55.7% (-70.9 to -37.3%) |
|                                            | Subarachnoid haemorrhage  | 12.1% (5.9–19%)    | 10.1 (4.7–16.7)     | -54.9% (-74.6 to -26.1%) | 9.6% (4.5–15.9%)   | 0.3 (0.1–0.6)    | -55.3% (-76.1 to -19.8%) |
| Environmental/occupational risk factors§   | Meningitis                | 0.8% (0.5–1.4%)    | 0.2 (0.1–0.4)       | -85% (-93.1 to -67.7%)   | 0.4% (0.2–0.7%)    | <0.1 (<0.1–<0.1) | -85% (-93.1 to -67.7%)   |
|                                            | Encephalitis              | 0.4% (0.2–0.7%)    | 0.1 (0–0.1)         | -41.4% (-77 to 37%)      | 0.2% (0.1–0.3%)    | <0.1 (<0.1–<0.1) | -41.5% (-77 to 37%)      |
|                                            | Stroke                    | 40.7% (34.8–45.5%) | 368.3 (286.9–481.2) | -47.1% (-59.7 to -31.1%) | 37.4% (30.3–43.6%) | 19.8 (14.7–26.9) | -39.8% (-56.9 to -17.7%) |
|                                            | Ischaemic stroke          | 38.7% (33.3–43.6%) | 223.5 (175.4–292.3) | -38.4% (-52.5 to -21.2%) | 36% (28.8–42.3%)   | 13.3 (9.8–18.7)  | -31.3% (-50.8 to -5.1%)  |
| High body-mass index                       | Intracerebral haemorrhage | 43.6% (37.3–48.6%) | 106.2 (80.2–142.6)  | -57.6% (-69.5 to -41.4%) | 39.9% (33.1–45.8%) | 5 (3.7–6.9)      | -51.8% (-66.2 to -31.5%) |
|                                            | Subarachnoid haemorrhage  | 46.2% (40.1–51.7%) | 38.6 (27.8–51.8)    | -53.6% (-72.6 to -24.5%) | 42.4% (35.8–48.2%) | 1.5 (1–2.1)      | -52% (-73.3 to -14.6%)   |
|                                            | Stroke                    | 35.9% (26.2–44.8%) | 324.2 (225.4–435.2) | -42.6% (-56.6 to -24.5%) | 21.6% (13.3–30.3%) | 11.4 (6.6–17.4)  | -38.9% (-57.4 to -13.9%) |
|                                            | Ischaemic stroke          | 27.9% (18.8–37.6%) | 160.9 (105.2–229)   | -28.6% (-46.3 to -6.7%)  | 16.8% (8–27%)      | 6.2 (2.8–10.5)   | -24.1% (-52.4 to 9.6%)   |

**Table S16** Regional and national disabilities and deaths related to neurological conditions attributable to risk factors in North Africa and Middle East countries

| Location<br>Risk factor (alphabetic order) | Cause                                   | DALYs (95% UI)     |                     |                          | Deaths (95% UI)          |                    |                          |                          |
|--------------------------------------------|-----------------------------------------|--------------------|---------------------|--------------------------|--------------------------|--------------------|--------------------------|--------------------------|
|                                            |                                         | PAF (%)            | Rate per 100,000    | Rate change (%)          | PAF (%)                  | Rate per 100,000   | Rate change (%)          |                          |
|                                            |                                         | 2019               | 2019                | From 1990 to 2019        | 2019                     | 2019               | From 1990 to 2019        |                          |
| High fasting plasma glucose                | Intracerebral haemorrhage               | 47.9% (36–59%)     | 116.7 (79.4–160.3)  | -53.6% (-66.4 to -35.8%) | 31.2% (18.2–45.6%)       | 3.9 (2.2–6.1)      | -50.9% (-68 to -29.3%)   |                          |
|                                            | Subarachnoid haemorrhage                | 55.8% (43.4–66.4%) | 46.7 (33–64.3)      | -47.3% (-68.7 to -17%)   | 38.4% (25.8–51.8%)       | 1.3 (0.8–2.1)      | -48% (-71.1 to -11%)     |                          |
|                                            | Neurological disorders*                 | 8.3% (2.4–18.2%)   | 112.2 (29.3–285.8)  | 41.8% (-13.2 to 138.1%)  | 17% (5–32.3%)            | 7.4 (1.2–23.8)     | 44.9% (-22.1 to 181.1%)  |                          |
|                                            | Alzheimer's disease and other dementias | 27.5% (11.3–45.9%) | 112.2 (29.3–285.8)  | 41.8% (-13.2 to 138.1%)  | 26.6% (10.3–45.5%)       | 7.4 (1.2–23.8)     | 44.9% (-22.1 to 181.1%)  |                          |
|                                            | Stroke                                  | 29.7% (19.5–45.8%) | 269.3 (169.1–439.4) | -45.8% (-61.2 to -25.7%) | 28.4% (16.4–52%)         | 15.1 (8.2–28.9)    | -42.3% (-61.4 to -16.6%) |                          |
|                                            | Ischaemic stroke                        | 30.1% (16.9–55.6%) | 174.2 (95.9–335.9)  | -41% (-57.4 to -17.7%)   | 28.4% (13.4–62.4%)       | 10.5 (4.8–23.7)    | -36.5% (-56.8 to -7.5%)  |                          |
|                                            | Intracerebral haemorrhage               | 29.3% (19.2–42.8%) | 71.3 (44.1–114)     | -54.6% (-68.8 to -33.4%) | 28.3% (16.9–47.7%)       | 3.6 (2–6.4)        | -52.7% (-68.9 to -29%)   |                          |
| High LDL cholesterol                       | Subarachnoid haemorrhage                | 28.5% (18.2–40.9%) | 23.8 (14.1–36.9)    | -46.7% (-69.9 to -5.7%)  | 28.8% (18.7–44.8%)       | 1 (0.6–1.8)        | -51.6% (-73.7 to -8.3%)  |                          |
|                                            | Neurological disorders*                 | 7.4% (1.5–19.2%)   | 100.4 (18.8–302.8)  | 56.9% (20.5 to 124.5%)   | 15.5% (3.4–33.9%)        | 6.8 (0.8–23.7)     | 64.2% (17.3 to 152.2%)   |                          |
|                                            | Alzheimer's disease and other dementias | 24.6% (6.6–46.8%)  | 100.4 (18.8–302.8)  | 56.9% (20.5 to 124.5%)   | 24.2% (6.4–46.4%)        | 6.8 (0.8–23.7)     | 64.2% (17.3 to 152.2%)   |                          |
|                                            | Stroke                                  | 13.2% (6–25.3%)    | 119.4 (51.4–239.5)  | -36.5% (-53.2 to -19.2%) | 12.5% (2.9–29.5%)        | 6.6 (1.4–16.4)     | -29.6% (-55.3 to -4.3%)  |                          |
|                                            | Ischaemic stroke                        | 20.7% (9.5–39.1%)  | 119.4 (51.4–239.5)  | -36.5% (-53.2 to -19.2%) | 18% (4.2–42.2%)          | 6.6 (1.4–16.4)     | -29.6% (-55.3 to -4.3%)  |                          |
|                                            | High systolic blood pressure            | Stroke             | 51.4% (42.9–59.9%)  | 465 (351.9–607)          | -44.5% (-58 to -27.8%)   | 48.2% (37.1–60%)   | 25.5 (18–36)             | -37.8% (-55.4 to -15.9%) |
|                                            |                                         | Ischaemic stroke   | 48.6% (37.6–60.2%)  | 280.6 (203.6–378.1)      | -35.8% (-50.9 to -17.4%) | 45.1% (31.2–61.7%) | 16.6 (11–25)             | -29.4% (-49.9 to -2.9%)  |
| Intracerebral haemorrhage                  |                                         | 56.2% (46–66.6%)   | 137.1 (98.8–182.8)  | -54.9% (-68.2 to -38.7%) | 55.1% (41–69.4%)         | 6.9 (4.6–9.7)      | -49% (-65.2 to -28.8%)   |                          |
| High temperature                           | Subarachnoid haemorrhage                | 56.5% (47–66.3%)   | 47.3 (32.9–65.5)    | -51.3% (-71.7 to -20.1%) | 56.4% (43.5–69.3%)       | 2 (1.3–2.9)        | -49.6% (-72.3 to -7.9%)  |                          |
|                                            | Stroke                                  | 5% (1.8–8.2%)      | 45 (15.8–81.7)      | -42.4% (-72.1 to -20.9%) | 6.2% (2.2–10.2%)         | 3.3 (1.2–6.2)      | -29.6% (-65.3 to -2.1%)  |                          |
|                                            | Ischaemic stroke                        | 4.7% (1.7–7.7%)    | 27 (9.5–51.2)       | -31.9% (-67 to -4.2%)    | 6.2% (2.2–10.2%)         | 2.3 (0.8–4.3)      | -20.7% (-61.3 to 10.6%)  |                          |
|                                            | Intracerebral haemorrhage               | 5.5% (2–9%)        | 13.4 (4.7–24.6)     | -53.8% (-78.5 to -32.5%) | 6.2% (2.2–10.2%)         | 0.8 (0.3–1.4)      | -43.7% (-72.9 to -18.5%) |                          |
| Household air pollution from solid fuels   | Subarachnoid haemorrhage                | 5.5% (1.9–9%)      | 4.6 (1.5–8.7)       | -51.6% (-80.4 to -18%)   | 6.2% (2.2–10.2%)         | 0.2 (0.1–0.4)      | -45.2% (-76.8 to 3.2%)   |                          |
|                                            | Meningitis                              | 0% (0–0%)          | <0.1 (<0.1–<0.1)    | -99.7% (-99.9 to -99.1%) | 0% (0–0%)                | <0.1 (<0.1–<0.1)   | -99.7% (-99.9 to -99.1%) |                          |
|                                            | Encephalitis                            | 0% (0–0%)          | <0.1 (<0.1–<0.1)    | -98.9% (-99.8 to -95.9%) | 0% (0–0%)                | <0.1 (<0.1–<0.1)   | -98.9% (-99.8 to -95.9%) |                          |
|                                            | Stroke                                  | 0% (0–0%)          | <0.1 (<0.1–<0.1)    | -99.1% (-99.7 to -97.5%) | 0% (0–0%)                | <0.1 (<0.1–<0.1)   | -99% (-99.7 to -97.3%)   |                          |
|                                            | Ischaemic stroke                        | 0% (0–0%)          | <0.1 (<0.1–<0.1)    | -98.9% (-99.7 to -97.1%) | 0% (0–0%)                | <0.1 (<0.1–<0.1)   | -98.9% (-99.7 to -97%)   |                          |
|                                            | Intracerebral haemorrhage               | 0% (0–0%)          | <0.1 (<0.1–<0.1)    | -99.3% (-99.8 to -98%)   | 0% (0–0%)                | <0.1 (<0.1–<0.1)   | -99.2% (-99.8 to -97.8%) |                          |
|                                            | Subarachnoid haemorrhage                | 0% (0–0%)          | <0.1 (<0.1–<0.1)    | -99.2% (-99.8 to -97.5%) | 0% (0–0%)                | <0.1 (<0.1–<0.1)   | -99.2% (-99.8 to -97.5%) |                          |
| Kidney dysfunction                         | Stroke                                  | 11.1% (7.8–14.1%)  | 100.2 (65.7–137.5)  | -27.5% (-46.5 to -4.4%)  | 10.1% (5.6–14.4%)        | 5.4 (2.8–8.1)      | -21.5% (-48.7 to 9.9%)   |                          |
|                                            | Ischaemic stroke                        | 12.4% (7.6–16.7%)  | 71.7 (41–102.6)     | -20.7% (-41.7 to 3.5%)   | 10% (3.9–15.7%)          | 3.7 (1.3–6.1)      | -16.5% (-50.1 to 17.9%)  |                          |
|                                            | Intracerebral haemorrhage               | 11.7% (8.6–14.7%)  | 28.5 (19.3–40.2)    | -40.3% (-57.9 to -16.1%) | 13.3% (8.5–17.7%)        | 1.7 (1–2.5)        | -30.6% (-53.1 to 2.1%)   |                          |
| Lead exposure                              | Stroke                                  | 1.8% (0.4–3.5%)    | 16.2 (3.3–33.3)     | -47.6% (-61.2 to -3.7%)  | 1.9% (0.5–3.6%)          | 1 (0.3–2)          | -31.8% (-50.8 to 36.5%)  |                          |
|                                            | Ischaemic stroke                        | 1.8% (0.4–3.5%)    | 10.2 (2.3–20.7)     | -35.3% (-51.9 to 15.6%)  | 1.8% (0.5–3.6%)          | 0.7 (0.2–1.4)      | -19% (-43.8 to 63.8%)    |                          |

**Table S16** Regional and national disabilities and deaths related to neurological conditions attributable to risk factors in North Africa and Middle East countries

| Location<br>Risk factor (alphabetic order) | Cause                                   | DALYs (95% UI)     |                     |                          | Deaths (95% UI)    |                  |                          |
|--------------------------------------------|-----------------------------------------|--------------------|---------------------|--------------------------|--------------------|------------------|--------------------------|
|                                            |                                         | PAF (%)            | Rate per 100,000    | Rate change (%)          | PAF (%)            | Rate per 100,000 | Rate change (%)          |
|                                            |                                         | 2019               | 2019                | From 1990 to 2019        | 2019               | 2019             | From 1990 to 2019        |
| Low birth weight                           | Intracerebral haemorrhage               | 1.9% (0.3–3.9%)    | 4.6 (0.7–10.2)      | -60.3% (-73.2 to -29.2%) | 2.2% (0.5–4.4%)    | 0.3 (0.1–0.6)    | -46.9% (-64.7 to 10.2%)  |
|                                            | Subarachnoid haemorrhage                | 1.7% (0.2–3.8%)    | 1.4 (0.2–3.5)       | -60.8% (-79.1 to -16.6%) | 2% (0.4–4.2%)      | 0.1 (0–0.2)      | -51% (-74.3 to 16.8%)    |
|                                            | Meningitis                              | 3.1% (2–4.7%)      | 0.8 (0.5–1.2)       | -85% (-92.6 to -70.8%)   | 1.5% (0.9–2.3%)    | <0.1 (<0.1–<0.1) | -85% (-92.6 to -70.8%)   |
|                                            | Encephalitis                            | 1.4% (0.8–2.3%)    | 0.2 (0.1–0.3)       | -41.7% (-76.9 to 32.2%)  | 0.7% (0.3–1.2%)    | <0.1 (<0.1–<0.1) | -41.7% (-77 to 32.2%)    |
| Low birth weight and short gestation       | Meningitis                              | 3.3% (2.1–5%)      | 0.8 (0.5–1.3)       | -84.8% (-92.5 to -70.8%) | 1.6% (1–2.5%)      | <0.1 (<0.1–<0.1) | -84.8% (-92.5 to -70.8%) |
|                                            | Encephalitis                            | 1.5% (0.8–2.4%)    | 0.2 (0.1–0.4)       | -41.1% (-76.5 to 32.8%)  | 0.7% (0.3–1.3%)    | <0.1 (<0.1–<0.1) | -41.1% (-76.5 to 32.8%)  |
| Low physical activity                      | Stroke                                  | 6.4% (1.5–13%)     | 57.8 (13.5–118.3)   | -27.1% (-44.5 to -1.1%)  | 8% (2–15.2%)       | 4.2 (1.1–8.3)    | -21% (-43.3 to 12%)      |
|                                            | Ischaemic stroke                        | 10% (2.4–20.2%)    | 57.8 (13.5–118.3)   | -27.1% (-44.5 to -1.1%)  | 11.5% (2.8–21.8%)  | 4.2 (1.1–8.3)    | -21% (-43.3 to 12%)      |
| Low temperature                            | Stroke                                  | 3% (-3.9–9%)       | 27.3 (-35.9–85.4)   |                          | 3.8% (-4.8–11.2%)  | 2 (-2.6–6.2)     |                          |
|                                            | Ischaemic stroke                        | 2.8% (-3.7–8.5%)   | 16.4 (-21.5–51)     |                          | 3.8% (-4.8–11.2%)  | 1.4 (-1.8–4.3)   |                          |
| Metabolic risk factors†                    | Intracerebral haemorrhage               | 3.3% (-4.2–9.9%)   | 8.1 (-10.8–26.3)    |                          | 3.8% (-4.8–11.2%)  | 0.5 (-0.6–1.5)   |                          |
|                                            | Subarachnoid haemorrhage                | 3.3% (-4.2–9.9%)   | 2.8 (-3.5–8.8)      |                          | 3.8% (-4.8–11.2%)  | 0.1 (-0.2–0.4)   |                          |
|                                            | Stroke                                  | 74.2% (66.2–81.9%) | 671.1 (536.5–855.7) | -43.6% (-56.7 to -27.6%) | 70% (58.6–81.6%)   | 37 (27.7–49.7)   | -36.9% (-54.2 to -16.1%) |
|                                            | Ischaemic stroke                        | 73.4% (63–84.8%)   | 423.7 (331.3–545.4) | -35.5% (-50.1 to -18.8%) | 68.8% (54.4–84.8%) | 25.4 (18.2–35.4) | -29.2% (-48.6 to -5.7%)  |
|                                            | Intracerebral haemorrhage               | 76% (68.3–82.7%)   | 185.3 (143.1–244.6) | -54.4% (-67.2 to -38.7%) | 73.2% (62.1–83.1%) | 9.2 (6.8–12.4)   | -48.7% (-63.9 to -29.4%) |
|                                            | Subarachnoid haemorrhage                | 74.3% (66.7–81.1%) | 62.1 (45.1–83.9)    | -50.6% (-70.8 to -19.8%) | 71.2% (59.4–81%)   | 2.5 (1.7–3.6)    | -50% (-72.2 to -9.6%)    |
| Non-optimal temperature                    | Neurological disorders*                 | 13.7% (4.8–28.4%)  | 184.7 (58.7–476.6)  | 41.8% (7.2 to 96.3%)     | 28.3% (10.9–49%)   | 12.4 (2.3–38)    | 46.6% (2.2 to 120.2%)    |
|                                            | Alzheimer's disease and other dementias | 45.3% (22.3–66.2%) | 184.7 (58.7–476.6)  | 41.8% (7.2 to 96.3%)     | 44.3% (22.1–65.8%) | 12.4 (2.3–38)    | 46.6% (2.2 to 120.2%)    |
|                                            | Stroke                                  | 7.8% (0.5–14.3%)   | 70.6 (4.5–138.3)    | -46.6% (-99.5 to -0.4%)  | 9.8% (0.7–17.9%)   | 5.2 (0.3–10.2)   | -34.6% (-99.4 to 20.9%)  |
|                                            | Ischaemic stroke                        | 7.3% (0.5–13.6%)   | 42.4 (2.7–83.9)     | -36.8% (-99.4 to 15.6%)  | 9.8% (0.7–17.9%)   | 3.6 (0.2–7.1)    | -26.4% (-99.3 to 39.3%)  |
|                                            | Intracerebral haemorrhage               | 8.6% (0.6–15.9%)   | 21 (1.4–41.1)       | -57.1% (-99.6 to -17%)   | 9.8% (0.7–17.9%)   | 1.2 (0.1–2.4)    | -47.7% (-99.5 to -1.6%)  |
|                                            | Subarachnoid haemorrhage                | 8.6% (0.6–15.7%)   | 7.2 (0.4–14.6)      | -55.2% (-99.6 to -8.2%)  | 9.8% (0.7–17.9%)   | 0.3 (0–0.7)      | -49.3% (-99.7 to 8.6%)   |
| Other environmental risks                  | Stroke                                  | 1.8% (0.4–3.5%)    | 16.2 (3.3–33.3)     | -47.6% (-61.2 to -3.7%)  | 1.9% (0.5–3.6%)    | 1 (0.3–2)        | -31.8% (-50.8 to 36.5%)  |
|                                            | Ischaemic stroke                        | 1.8% (0.4–3.5%)    | 10.2 (2.3–20.7)     | -35.3% (-51.9 to 15.6%)  | 1.8% (0.5–3.6%)    | 0.7 (0.2–1.4)    | -19% (-43.8 to 63.8%)    |
|                                            | Intracerebral haemorrhage               | 1.9% (0.3–3.9%)    | 4.6 (0.7–10.2)      | -60.3% (-73.2 to -29.2%) | 2.2% (0.5–4.4%)    | 0.3 (0.1–0.6)    | -46.9% (-64.7 to 10.2%)  |
|                                            | Subarachnoid haemorrhage                | 1.7% (0.2–3.8%)    | 1.4 (0.2–3.5)       | -60.8% (-79.1 to -16.6%) | 2% (0.4–4.2%)      | 0.1 (0–0.2)      | -51% (-74.3 to 16.8%)    |
| Particulate matter pollution               | Meningitis                              | 0.8% (0.5–1.4%)    | 0.2 (0.1–0.4)       | -85% (-93.1 to -67.7%)   | 0.4% (0.2–0.7%)    | <0.1 (<0.1–<0.1) | -85% (-93.1 to -67.7%)   |
|                                            | Encephalitis                            | 0.4% (0.2–0.7%)    | 0.1 (0–0.1)         | -41.4% (-77 to 37%)      | 0.2% (0.1–0.3%)    | <0.1 (<0.1–<0.1) | -41.5% (-77 to 37%)      |
|                                            | Stroke                                  | 34.4% (30.7–37.7%) | 311.4 (248–397.1)   | -47.6% (-59.5 to -32.5%) | 29.2% (25.9–32.5%) | 15.5 (11.9–20.7) | -41.7% (-57.7 to -21.6%) |
|                                            | Ischaemic stroke                        | 32.5% (28.7–35.9%) | 187.7 (150.1–237.5) | -39.3% (-52.9 to -23.6%) | 27.8% (24.4–31.2%) | 10.2 (7.9–13.7)  | -33.5% (-51.6 to -10.4%) |
|                                            | Intracerebral haemorrhage               | 37% (32.9–40.3%)   | 90.2 (70.3–119.3)   | -57.9% (-69.4 to -43%)   | 31.9% (28.3–35.3%) | 4 (3.1–5.5)      | -53.3% (-66.8 to -34.4%) |
|                                            | Subarachnoid haemorrhage                | 40.1% (35.6–43.7%) | 33.5 (24.6–44.2)    | -53.2% (-72.4 to -24.7%) | 34.8% (30.8–38.6%) | 1.2 (0.9–1.6)    | -52.8% (-73.5 to -15.6%) |

**Table S16** Regional and national disabilities and deaths related to neurological conditions attributable to risk factors in North Africa and Middle East countries

| Location                                | Risk factor (alphabetic order) | Cause                                   | DALYs (95% UI)            |                     |                          | Deaths (95% UI)          |                  |                          |                          |
|-----------------------------------------|--------------------------------|-----------------------------------------|---------------------------|---------------------|--------------------------|--------------------------|------------------|--------------------------|--------------------------|
|                                         |                                |                                         | PAF (%)                   | Rate per 100,000    | Rate change (%)          | PAF (%)                  | Rate per 100,000 | Rate change (%)          |                          |
|                                         |                                |                                         | 2019                      | 2019                | From 1990 to 2019        | 2019                     | 2019             | From 1990 to 2019        |                          |
| Secondhand smoke                        | Stroke                         | Ischaemic stroke                        | 3% (2.3–3.7%)             | 27.2 (18.9–36.6)    | -57.1% (-68.8 to -42.8%) | 2.6% (1.9–3.3%)          | 1.4 (0.9–1.9)    | -50.6% (-64.8 to -30.8%) |                          |
|                                         |                                | Intracerebral haemorrhage               | 2.6% (2–3.3%)             | 15.2 (10.4–20.7)    | -49.3% (-62.2 to -31.6%) | 2.4% (1.7–3.1%)          | 0.9 (0.6–1.3)    | -42.7% (-59.7 to -19.2%) |                          |
|                                         |                                | Subarachnoid haemorrhage                | 3.5% (2.7–4.4%)           | 8.6 (5.8–12)        | -65.4% (-75.6 to -51.6%) | 3% (2.2–3.7%)            | 0.4 (0.3–0.5)    | -60.8% (-73.1 to -44.5%) |                          |
|                                         |                                | Neurological disorders*                 | 4% (3.1–5.1%)             | 3.4 (2.3–4.7)       | -60.4% (-75.8 to -35.5%) | 3.4% (2.6–4.3%)          | 0.1 (0.1–0.2)    | -59.1% (-76.1 to -28.9%) |                          |
|                                         | Short gestation                | Meningitis                              | 2.6% (1.7–4%)             | 0.7 (0.4–1)         | -83.4% (-91.8 to -67.6%) | 1.3% (0.8–2%)            | <0.1 (<0.1–<0.1) | -83.4% (-91.8 to -67.6%) |                          |
|                                         |                                | Encephalitis                            | 1.2% (0.6–1.9%)           | 0.2 (0.1–0.3)       | -34.8% (-73.6 to 46.8%)  | 0.6% (0.3–1%)            | <0.1 (<0.1–<0.1) | -34.8% (-73.6 to 46.8%)  |                          |
|                                         | Smoking                        | Stroke                                  | Ischaemic stroke          | 9.4% (8.2–10.7%)    | 84.9 (65.5–108.6)        | -53% (-66.5 to -35.3%)   | 5.9% (5–6.9%)    | 3.1 (2.3–4.3)            | -49.2% (-66.2 to -25.6%) |
|                                         |                                |                                         | Intracerebral haemorrhage | 8% (6.9–9.2%)       | 46 (35.1–59.4)           | -45.8% (-59.7 to -24.6%) | 4.9% (4–5.9%)    | 1.8 (1.3–2.6)            | -40.2% (-60.1 to -9.2%)  |
|                                         |                                |                                         | Subarachnoid haemorrhage  | 11.5% (9.9–13.2%)   | 28.1 (21–37.8)           | -61.3% (-74.1 to -44.7%) | 7.8% (6.6–9.2%)  | 1 (0.7–1.3)              | -59.1% (-73.5 to -40.1%) |
|                                         |                                |                                         | Neurological disorders*   | 12.9% (10.8–15.2%)  | 10.8 (7.5–15)            | -53.8% (-76.7 to -15.1%) | 9.1% (7.2–11%)   | 0.3 (0.2–0.5)            | -53.8% (-78.6 to -7.4%)  |
| Alzheimer's disease and other dementias |                                | Alzheimer's disease and other dementias | 3.9% (1.2–8.6%)           | 53.4 (13.7–139.2)   | 52.5% (12.9 to 114.8%)   | 6.6% (0.5–12.9%)         | 3.1 (0.1–10.2)   | 79.8% (-14 to 283%)      |                          |
|                                         |                                | Parkinson's disease                     | 15% (9–21%)               | 60.9 (22.1–145.6)   | 42.2% (4.6 to 85.2%)     | 13.1% (7.8–18.9%)        | 3.7 (0.8–10.9)   | 68.1% (17.4 to 134.8%)   |                          |
|                                         |                                | Parkinson's disease                     | -6.2% (-9.4–3.2%)         | -9.1 (-15.3–4.5)    | 1.3% (-32.7 to 50.8%)    | -5.5% (-8.5–2.8%)        | -0.6 (-1–0.3)    | 25% (-19.8 to 91.6%)     |                          |
|                                         |                                | Multiple sclerosis                      | 9.8% (7–12.7%)            | 1.6 (1–2.4)         | 34.6% (-2.4 to 80.1%)    | 9.7% (6.7–13.2%)         | <0.1 (<0.1–<0.1) | -18% (-58.3 to 36.4%)    |                          |
|                                         |                                | Tobacco                                 | Stroke                    | 12.1% (10.7–13.5%)  | 109.1 (85.3–138.6)       | -53.7% (-66.3 to -37.6%) | 8.3% (7.1–9.5%)  | 4.4 (3.2–5.9)            | -49.2% (-64.7 to -28.3%) |
|                                         |                                |                                         | Ischaemic stroke          | 10.3% (9.1–11.7%)   | 59.8 (46.9–76.5)         | -46.2% (-59.6 to -27.9%) | 7.1% (6–8.3%)    | 2.6 (1.9–3.7)            | -40.5% (-58.4 to -13.8%) |
| Tobacco                                 | Intracerebral haemorrhage      | Intracerebral haemorrhage               | 14.6% (12.9–16.4%)        | 35.6 (26.4–47.8)    | -62% (-73.8 to -47%)     | 10.5% (9.1–12%)          | 1.3 (1–1.8)      | -59.3% (-72.6 to -42.1%) |                          |
|                                         |                                | Subarachnoid haemorrhage                | 16.4% (14.1–18.7%)        | 13.7 (9.6–18.8)     | -55.2% (-76 to -23.2%)   | 12.2% (10–14.3%)         | 0.4 (0.3–0.6)    | -55% (-77.2 to -18.6%)   |                          |
|                                         | Neurological disorders*        | Neurological disorders*                 | 3.9% (1.2–8.6%)           | 53.4 (13.7–139.2)   | 52.5% (12.9 to 114.8%)   | 6.6% (0.5–12.9%)         | 3.1 (0.1–10.2)   | 79.8% (-14 to 283%)      |                          |
|                                         |                                | Alzheimer's disease and other dementias | 15% (9–21%)               | 60.9 (22.1–145.6)   | 42.2% (4.6 to 85.2%)     | 13.1% (7.8–18.9%)        | 3.7 (0.8–10.9)   | 68.1% (17.4 to 134.8%)   |                          |
|                                         | Tobacco                        | Parkinson's disease                     | -6.2% (-9.4–3.2%)         | -9.1 (-15.3–4.5)    | 1.3% (-32.7 to 50.8%)    | -5.5% (-8.5–2.8%)        | -0.6 (-1–0.3)    | 25% (-19.8 to 91.6%)     |                          |
|                                         |                                | Multiple sclerosis                      | 9.8% (7–12.7%)            | 1.6 (1–2.4)         | 34.6% (-2.4 to 80.1%)    | 9.7% (6.7–13.2%)         | <0.1 (<0.1–<0.1) | -18% (-58.3 to 36.4%)    |                          |
| <b>Saudi Arabia</b>                     |                                |                                         |                           |                     |                          |                          |                  |                          |                          |
| Air pollution                           | Meningitis                     | Meningitis                              | 0.1% (0–0.2%)             | <0.1 (<0.1–0.1)     | -90% (-96.4 to -74.6%)   | 0% (0–0.1%)              | <0.1 (<0.1–<0.1) | -90.1% (-96.4 to -74.6%) |                          |
|                                         |                                | Encephalitis                            | 0.1% (0–0.5%)             | <0.1 (<0.1–0.2)     | -49.5% (-89.5 to 45.4%)  | 0.1% (0–0.3%)            | <0.1 (<0.1–<0.1) | -49.5% (-89.6 to 45.2%)  |                          |
|                                         | Stroke                         | Stroke                                  | 35.8% (31.6–39.7%)        | 756.8 (587–933.1)   | -27.8% (-47.1 to -2.5%)  | 30.5% (26.7–34.2%)       | 31.4 (23.9–38.6) | -32.9% (-50.5 to -7.9%)  |                          |
|                                         |                                | Ischaemic stroke                        | 33.7% (29.6–37.6%)        | 438.6 (340.4–538.6) | -15.3% (-36.7 to 9.4%)   | 28.7% (25–32.4%)         | 20.2 (15.2–24.9) | -23% (-43.4 to 3.2%)     |                          |
|                                         |                                | Intracerebral haemorrhage               | 38.9% (34.3–43%)          | 297.9 (227.2–374.6) | -39.3% (-57.9 to -10.2%) | 34.3% (30.1–38.2%)       | 10.7 (8–13.4)    | -44.9% (-61.1 to -18.4%) |                          |
|                                         |                                | Subarachnoid haemorrhage                | 40.9% (36–45.4%)          | 20.3 (14.5–27.1)    | -49.4% (-70.7 to -14.8%) | 36.2% (31.7–40.5%)       | 0.5 (0.4–0.7)    | -56.3% (-76.5 to -22%)   |                          |
| Alcohol use                             | Stroke                         | Stroke                                  | 0.2% (-0.1–0.6%)          | 4 (-2.6–14.2)       | -76.6% (-183.4 to 70.1%) | 0.1% (-0.1–0.4%)         | 0.1 (-0.1–0.4)   | -82.2% (-223.3 to 59.1%) |                          |

**Table S16** Regional and national disabilities and deaths related to neurological conditions attributable to risk factors in North Africa and Middle East countries

| Location<br>Risk factor (alphabetic order) | Cause                                   | DALYs (95% UI)            |                       |                            | Deaths (95% UI)         |                    |                            |
|--------------------------------------------|-----------------------------------------|---------------------------|-----------------------|----------------------------|-------------------------|--------------------|----------------------------|
|                                            |                                         | PAF (%)                   | Rate per 100,000      | Rate change (%)            | PAF (%)                 | Rate per 100,000   | Rate change (%)            |
|                                            |                                         | 2019                      | 2019                  | From 1990 to 2019          | 2019                    | 2019               | From 1990 to 2019          |
| All risk factors                           | Ischaemic stroke                        | -0.1% (-0.3–0.2%)         | -0.9 (-3.9–2.7)       | -212.9% (-592.5 to 750.3%) | -0.1% (-0.2–0.1%)       | -0.1 (-0.2–0.1)    | 1021.8% (-591.9 to 505.3%) |
|                                            | Intracerebral haemorrhage               | 0.6% (0–1.6%)             | 4.9 (0.1–12.4)        | -70.2% (-93.7 to -44.5%)   | 0.5% (0–1.3%)           | 0.2 (0–0.4)        | -72.6% (-94.9 to -49.2%)   |
|                                            | Neurological disorders*                 | 0.1% (0–0.4%)             | 2 (0.3–4.9)           | -43.1% (-78.4 to 26.9%)    | 0.1% (0–0.2%)           | <0.1 (<0.1–<0.1)   | -47.3% (-75.5 to -7.5%)    |
|                                            | Idiopathic epilepsy                     | 0.9% (0.2–1.9%)           | 2 (0.3–4.9)           | -43.1% (-78.4 to 26.9%)    | 1.1% (0.2–2.2%)         | <0.1 (<0.1–<0.1)   | -47.3% (-75.5 to -7.5%)    |
|                                            | Meningitis                              | 0.5% (0.3–0.8%)           | 0.1 (0.1–0.2)         | -90.5% (-95.6 to -80.6%)   | 0.2% (0.1–0.3%)         | <0.1 (<0.1–<0.1)   | -90.5% (-95.6 to -80.6%)   |
|                                            | Encephalitis                            | 0.5% (0.1–1.8%)           | 0.2 (0–0.6)           | -49.8% (-87.4 to 7%)       | 0.2% (0.1–1%)           | <0.1 (<0.1–<0.1)   | -49.8% (-87.4 to 7%)       |
|                                            | Stroke                                  | 89.6% (86.4–92.5%)        | 1894.5 (1500.9–2230)  | -25.6% (-44 to -0.7%)      | 86.7% (82.2–91.3%)      | 89.1 (68.5–105.4)  | -29.3% (-47.1 to -5%)      |
|                                            | Ischaemic stroke                        | 89% (84.9–93.3%)          | 1158.4 (900.6–1354.2) | -13.3% (-33.9 to 12.6%)    | 86% (79.8–92.5%)        | 60.3 (44.8–72.3)   | -19.1% (-39.2 to 8.2%)     |
|                                            | Intracerebral haemorrhage               | 90.5% (87.4–93.2%)        | 692.6 (537.9–846.2)   | -38.5% (-55.9 to -9.9%)    | 88.3% (83.7–92.4%)      | 27.5 (20.9–33.5)   | -43.4% (-58.5 to -17.5%)   |
|                                            | Subarachnoid haemorrhage                | 88% (84.4–91%)            | 43.5 (31.5–57.1)      | -49% (-70.8 to -15.5%)     | 86.5% (81.6–90.4%)      | 1.3 (0.9–1.7)      | -55.1% (-75.8 to -20.6%)   |
|                                            | Neurological disorders*                 | 11.8% (4.7–24%)           | 167.4 (58.6–413)      | 38.4% (14.4 to 83.8%)      | 27% (11.4–43.8%)        | 10.7 (2–31.1)      | 43.2% (14.2 to 117.2%)     |
|                                            | Alzheimer's disease and other dementias | 43.8% (27.4–61.3%)        | 170.8 (62.3–417.9)    | 39.2% (14.9 to 86%)        | 41.8% (25.4–59.8%)      | 11 (2.3–31.5)      | 41.8% (13.5 to 108.7%)     |
|                                            | Parkinson's disease                     | -5.9% (-8.8–3.2%)         | -6.5 (-10.1–3.2)      | 7.7% (-29.9 to 74.6%)      | -4.9% (-7.4–2.6%)       | -0.4 (-0.6–0.2)    | 2.2% (-35.4 to 73.7%)      |
| Ambient particulate matter pollution       | Idiopathic epilepsy                     | 0.9% (0.2–1.9%)           | 2 (0.3–4.9)           | -43.1% (-78.4 to 26.9%)    | 1.1% (0.2–2.2%)         | <0.1 (<0.1–<0.1)   | -47.3% (-75.5 to -7.5%)    |
|                                            | Multiple sclerosis                      | 8.9% (6.4–11.9%)          | 1 (0.7–1.5)           | 56.6% (9.9 to 129.6%)      | 10% (7.1–13.5%)         | <0.1 (<0.1–<0.1)   | 61.4% (-19.4 to 275.5%)    |
|                                            | Meningitis                              | 0.1% (0–0.2%)             | <0.1 (<0.1–0.1)       | -77.8% (-93 to -33.1%)     | 0% (0–0.1%)             | <0.1 (<0.1–<0.1)   | -77.9% (-93 to -33.2%)     |
|                                            | Encephalitis                            | 0.1% (0–0.5%)             | <0.1 (<0.1–0.2)       | 11.6% (-78.9 to 278.1%)    | 0.1% (0–0.3%)           | <0.1 (<0.1–<0.1)   | 11.5% (-78.9 to 278.2%)    |
|                                            | Stroke                                  | 35.7% (31.5–39.6%)        | 755.2 (585.6–932.5)   | 43% (-10.3 to 165.7%)      | 30.5% (26.6–34.1%)      | 31.3 (23.8–38.5)   | 33.5% (-15.5 to 150.3%)    |
|                                            | Ischaemic stroke                        | 33.6% (29.6–37.6%)        | 437.7 (339.6–537.8)   | 68.4% (7.4 to 203.9%)      | 28.7% (25–32.4%)        | 20.1 (15.2–24.8)   | 53.9% (-3.4 to 182.6%)     |
|                                            | Intracerebral haemorrhage               | 38.9% (34.3–43%)          | 297.3 (227–374.1)     | 19.7% (-28.4 to 127.3%)    | 34.2% (30–38.1%)        | 10.7 (8–13.4)      | 9.1% (-33.9 to 109.1%)     |
|                                            | Subarachnoid haemorrhage                | 40.8% (35.9–45.3%)        | 20.2 (14.5–27.1)      | 2.3% (-47.7 to 121.3%)     | 36.1% (31.7–40.4%)      | 0.5 (0.4–0.7)      | -12% (-58.4 to 96.6%)      |
|                                            | Meningitis                              | 0.4% (0.2–0.7%)           | 0.1 (0.1–0.2)         | -90.2% (-95.5 to -80.2%)   | 0.1% (0.1–0.3%)         | <0.1 (<0.1–<0.1)   | -90.2% (-95.5 to -80.2%)   |
|                                            | Encephalitis                            | 0.5% (0.1–1.7%)           | 0.1 (0–0.6)           | -48.4% (-87.3 to 10.2%)    | 0.2% (0.1–0.9%)         | <0.1 (<0.1–<0.1)   | -48.4% (-87.3 to 10.2%)    |
|                                            | Stroke                                  | 34.6% (28.7–40.8%)        | 733.4 (537.4–930.3)   | -20.6% (-41.8 to 9%)       | 30.4% (24–36.7%)        | 31.3 (22–39.9)     | -25.7% (-46.3 to 2.1%)     |
|                                            | Ischaemic stroke                        | 36% (27.6–44.2%)          | 468.5 (331.8–611)     | -7.8% (-30.3 to 23.7%)     | 31.8% (23.2–40%)        | 22.3 (14.7–29.5)   | -16.4% (-38 to 14%)        |
|                                            | Behavioural risk factors‡               | Intracerebral haemorrhage | 32.5% (26.6–39.2%)    | 248.7 (175.9–329.9)        | -35.4% (-55.3 to -3.9%) | 27.4% (22.1–33.8%) | 8.5 (5.9–11.4)             |
| Subarachnoid haemorrhage                   |                                         | 32.7% (26.6–39.8%)        | 16.2 (10.8–22.2)      | -46.5% (-70.2 to -8.6%)    | 28.2% (22.6–34.7%)      | 0.4 (0.3–0.6)      | -53.2% (-75.9 to -14.7%)   |
| Neurological disorders*                    |                                         | 2.7% (0.9–5.7%)           | 37.9 (11.4–95.3)      | -1.5% (-31.3 to 38.8%)     | 4.5% (0.6–8.5%)         | 1.9 (0.1–5.8)      | -1.6% (-42.5 to 74.5%)     |
| Alzheimer's disease and other dementias    |                                         | 10.6% (6.3–15.5%)         | 41.4 (15.4–99)        | 2.7% (-25.9 to 43.7%)      | 8.3% (4.9–12.3%)        | 2.2 (0.5–6.2)      | -0.4% (-30.4 to 52.6%)     |
| Parkinson's disease                        |                                         | -5.9% (-8.8–3.2%)         | -6.5 (-10.1–3.2)      | 7.7% (-29.9 to 74.6%)      | -4.9% (-7.4–2.6%)       | -0.4 (-0.6–0.2)    | 2.2% (-35.4 to 73.7%)      |

**Table S16** Regional and national disabilities and deaths related to neurological conditions attributable to risk factors in North Africa and Middle East countries

| Location<br>Risk factor (alphabetic order) | Cause                     | DALYs (95% UI)     |                     |                          | Deaths (95% UI)    |                  |                          |
|--------------------------------------------|---------------------------|--------------------|---------------------|--------------------------|--------------------|------------------|--------------------------|
|                                            |                           | PAF (%)            | Rate per 100,000    | Rate change (%)          | PAF (%)            | Rate per 100,000 | Rate change (%)          |
|                                            |                           | 2019               | 2019                | From 1990 to 2019        | 2019               | 2019             | From 1990 to 2019        |
| Child and maternal malnutrition            | Idiopathic epilepsy       | 0.9% (0.2–1.9%)    | 2 (0.3–4.9)         | -43.1% (-78.4 to 26.9%)  | 1.1% (0.2–2.2%)    | <0.1 (<0.1–<0.1) | -47.3% (-75.5 to -7.5%)  |
|                                            | Multiple sclerosis        | 8.9% (6.4–11.9%)   | 1 (0.7–1.5)         | 56.6% (9.9 to 129.6%)    | 10% (7.1–13.5%)    | <0.1 (<0.1–<0.1) | 61.4% (-19.4 to 275.5%)  |
|                                            | Meningitis                | 0.4% (0.2–0.7%)    | 0.1 (0.1–0.2)       | -90.2% (-95.5 to -80.2%) | 0.1% (0.1–0.3%)    | <0.1 (<0.1–<0.1) | -90.2% (-95.5 to -80.2%) |
|                                            | Encephalitis              | 0.5% (0.1–1.7%)    | 0.1 (0–0.6)         | -48.4% (-87.3 to 10.2%)  | 0.2% (0.1–0.9%)    | <0.1 (<0.1–<0.1) | -48.4% (-87.3 to 10.2%)  |
| Diet high in red meat                      | Stroke                    | 3.5% (1.3–5.4%)    | 73.2 (25.6–120.4)   | -30.9% (-52.4 to -2.7%)  | 2.6% (1.4–1%)      | 2.7 (0.9–4.5)    | -35% (-54.9 to -7.8%)    |
|                                            | Ischaemic stroke          | 3% (0.4–4.7%)      | 38.7 (5.6–66.7)     | -15.6% (-38 to 12.3%)    | 2.2% (0.4–3.6%)    | 1.6 (0.2–2.7)    | -22.2% (-43.5 to 5.5%)   |
|                                            | Intracerebral haemorrhage | 4.2% (0.5–6.9%)    | 32.2 (4.1–58.3)     | -41.7% (-59.7 to -13.5%) | 3.5% (0.5–5.7%)    | 1.1 (0.1–2)      | -46.3% (-62.5 to -20.8%) |
|                                            | Subarachnoid haemorrhage  | 4.8% (0.6–8%)      | 2.4 (0.3–4.5)       | -52% (-72.8 to -19.4%)   | 3.9% (0.5–6.5%)    | 0.1 (0–0.1)      | -58.1% (-77.9 to -24.1%) |
| Diet high in sodium                        | Stroke                    | 2.1% (0.3–8.4%)    | 44.4 (5.4–176)      | -25.1% (-57.6 to 38%)    | 1.8% (0.3–7%)      | 1.8 (0.3–7.3)    | -28.9% (-60 to 30.6%)    |
|                                            | Ischaemic stroke          | 1.9% (0.3–7.6%)    | 24.5 (3.3–96.7)     | -10.6% (-52.1 to 61.8%)  | 1.6% (0.3–6.2%)    | 1.1 (0.2–4.5)    | -16.6% (-54.5 to 50.5%)  |
|                                            | Intracerebral haemorrhage | 2.5% (0.3–9.9%)    | 18.8 (1.9–75.7)     | -36.7% (-65.1 to 21.8%)  | 2.2% (0.3–8.9%)    | 0.7 (0.1–2.9)    | -41.2% (-68.4 to 10.7%)  |
|                                            | Subarachnoid haemorrhage  | 2.3% (0.2–8.9%)    | 1.1 (0.1–4.5)       | -48.1% (-74.9 to 11.6%)  | 2.1% (0.3–8.6%)    | <0.1 (<0.1–0.1)  | -54% (-79.3 to 2.2%)     |
| Diet low in fibre                          | Stroke                    | 1.4% (0.3–3%)      | 29.8 (6.9–66.9)     | -40.5% (-58 to -14.1%)   | 1.2% (0.3–2.5%)    | 1.2 (0.3–2.7)    | -49.3% (-65.1 to -25.2%) |
|                                            | Ischaemic stroke          | 1.3% (0.3–2.8%)    | 17.1 (4.1–37.3)     | -30.5% (-50.8 to -4.8%)  | 1.1% (0.3–2.3%)    | 0.8 (0.2–1.7)    | -42.7% (-62.1 to -14.6%) |
|                                            | Intracerebral haemorrhage | 1.5% (0.3–3.3%)    | 11.8 (2.6–27.1)     | -49.4% (-65.3 to -21.9%) | 1.3% (0.3–2.9%)    | 0.4 (0.1–0.9)    | -57.3% (-70.8 to -33.9%) |
|                                            | Subarachnoid haemorrhage  | 2% (0.4–4.2%)      | 1 (0.2–2.1)         | -57.1% (-76.2 to -24.6%) | 1.6% (0.3–3.4%)    | <0.1 (<0.1–0.1)  | -64.6% (-81.5 to -34.4%) |
| Diet low in fruits                         | Stroke                    | 5.5% (2.5–9.1%)    | 116.7 (51.3–200.3)  | -7.3% (-38.1 to 36.2%)   | 4.3% (2.7–1%)      | 4.4 (1.9–7.7)    | -16.1% (-43 to 20.6%)    |
|                                            | Ischaemic stroke          | 4.2% (0.9–8.1%)    | 54.5 (11.2–111.4)   | 18.6% (-21.9 to 95%)     | 3.3% (0.7–6.4%)    | 2.3 (0.5–4.7)    | 2.4% (-32 to 62.8%)      |
|                                            | Intracerebral haemorrhage | 7.6% (3.4–14%)     | 57.9 (24.8–113.4)   | -20.9% (-48.6 to 24.1%)  | 6.5% (2.8–12.1%)   | 2 (0.9–3.9)      | -28.8% (-53.2 to 11.3%)  |
|                                            | Subarachnoid haemorrhage  | 8.7% (4–16.1%)     | 4.3 (1.8–8.4)       | -36.4% (-65.7 to 13.8%)  | 7.2% (3.3–13.5%)   | 0.1 (0–0.2)      | -44.2% (-72.2 to 6.3%)   |
| Diet low in vegetables                     | Stroke                    | 2.6% (0.7–4.9%)    | 55.3 (15.9–106.5)   | -15.9% (-41.9 to 24.6%)  | 2.2% (0.7–3.9%)    | 2.2 (0.7–4.2)    | -28.5% (-49.6 to 2.1%)   |
|                                            | Ischaemic stroke          | 2.2% (0.2–4.2%)    | 28.2 (3.1–55.9)     | -3.6% (-30.9 to 29.3%)   | 1.8% (0.2–3.4%)    | 1.3 (0.2–2.5)    | -19% (-41.1 to 10.6%)    |
|                                            | Intracerebral haemorrhage | 3.3% (0.2–7.9%)    | 25.4 (1.7–62.8)     | -24.8% (-49.8 to 31.5%)  | 3% (0.2–7.1%)      | 0.9 (0.1–2.2)    | -37.1% (-56.3 to -0.5%)  |
|                                            | Subarachnoid haemorrhage  | 3.6% (0.2–8.8%)    | 1.8 (0.1–4.6)       | -36.2% (-64.8 to 35.6%)  | 3.2% (0.2–7.6%)    | <0.1 (<0.1–0.1)  | -48.3% (-72.7 to 1.5%)   |
| Diet low in whole grains                   | Stroke                    | 3.5% (0.9–5.1%)    | 73.3 (18.1–113.5)   | -13.4% (-35.1 to 12.4%)  | 3.1% (0.8–4.5%)    | 3.2 (0.8–4.9)    | -22% (-42.9 to 3.1%)     |
|                                            | Ischaemic stroke          | 5.6% (1.4–8.3%)    | 73.3 (18.1–113.5)   | -13.4% (-35.1 to 12.4%)  | 4.6% (1.2–6.7%)    | 3.2 (0.8–4.9)    | -22% (-42.9 to 3.1%)     |
| Dietary risks                              | Stroke                    | 17% (12.3–23.1%)   | 360.3 (239.3–508.8) | -21% (-42.5 to 7.4%)     | 14.2% (10.2–19.2%) | 14.5 (9.5–20.6)  | -28.3% (-48.4 to -3.2%)  |
|                                            | Ischaemic stroke          | 16.6% (10.2–22.7%) | 215.8 (130.3–308.2) | -9.3% (-32.1 to 19.9%)   | 13.6% (8.4–18.7%)  | 9.5 (5.6–13.7)   | -19.4% (-40.5 to 7.7%)   |
|                                            | Intracerebral haemorrhage | 17.6% (10.7–25.6%) | 134.9 (74.9–208.6)  | -32.7% (-53.7 to -1%)    | 15.4% (9.2–22.6%)  | 4.8 (2.6–7.4)    | -39.8% (-57.7 to -11.4%) |
|                                            | Subarachnoid haemorrhage  | 19.5% (12.1–27.5%) | 9.7 (5.4–14.8)      | -44.7% (-69.4 to -3.8%)  | 16.7% (10.2–24.1%) | 0.3 (0.1–0.4)    | -52.3% (-75.2 to -11.8%) |
| Environmental/occupational risk factors§   | Meningitis                | 0.1% (0–0.2%)      | <0.1 (<0.1–0.1)     | -90% (-96.4 to -74.6%)   | 0% (0–0.1%)        | <0.1 (<0.1–<0.1) | -90.1% (-96.4 to -74.6%) |
|                                            | Encephalitis              | 0.1% (0–0.5%)      | <0.1 (<0.1–0.2)     | -49.5% (-89.5 to 45.4%)  | 0.1% (0–0.3%)      | <0.1 (<0.1–<0.1) | -49.5% (-89.6 to 45.2%)  |
|                                            | Stroke                    | 42.3% (37.6–46.5%) | 895.3 (692–1088.5)  | -29.2% (-47.8 to -3.3%)  | 38.4% (33.8–42.5%) | 39.5 (29.6–47.9) | -32.8% (-50.4 to -8%)    |



**Table S16** Regional and national disabilities and deaths related to neurological conditions attributable to risk factors in North Africa and Middle East countries

| Location<br>Risk factor (alphabetic order) | Cause                                   | DALYs (95% UI)     |                       |                          | Deaths (95% UI)    |                  |                          |
|--------------------------------------------|-----------------------------------------|--------------------|-----------------------|--------------------------|--------------------|------------------|--------------------------|
|                                            |                                         | PAF (%)            | Rate per 100,000      | Rate change (%)          | PAF (%)            | Rate per 100,000 | Rate change (%)          |
|                                            |                                         | 2019               | 2019                  | From 1990 to 2019        | 2019               | 2019             | From 1990 to 2019        |
| High body-mass index                       | Ischaemic stroke                        | 40.3% (35.9–44.5%) | 524.2 (403.5–632.7)   | -16.6% (-37.7 to 9.1%)   | 36.7% (32.2–40.7%) | 25.7 (19.4–31.2) | -22.4% (-43.1 to 3.5%)   |
|                                            | Intracerebral haemorrhage               | 45.5% (40.6–49.9%) | 348.2 (267.3–438.1)   | -40.9% (-58.1 to -12.8%) | 42.1% (37.3–46.5%) | 13.1 (9.9–16.3)  | -45.5% (-60.7 to -19%)   |
|                                            | Subarachnoid haemorrhage                | 46.4% (41.5–51.1%) | 23 (16.3–30.7)        | -51.4% (-72.2 to -18.4%) | 43.4% (38.5–48%)   | 0.7 (0.4–0.9)    | -56.9% (-76.9 to -23.2%) |
|                                            | Stroke                                  | 43.6% (32.3–52.9%) | 921.9 (636.9–1223.3)  | 5.8% (-24.5 to 55.6%)    | 29.5% (20–38.1%)   | 30.3 (19.7–42)   | 3.8% (-27.5 to 55.8%)    |
|                                            | Ischaemic stroke                        | 34.6% (24.4–43.9%) | 450 (293.5–608.5)     | 40.8% (-0.3 to 103.7%)   | 22.9% (14.3–32.2%) | 16.1 (9.4–23.5)  | 34.3% (-9.4 to 100%)     |
|                                            | Intracerebral haemorrhage               | 57.5% (44.3–68.2%) | 439.8 (311.3–584.2)   | -12.7% (-40 to 38.5%)    | 43.3% (31.2–55%)   | 13.5 (8.8–18.6)  | -15.7% (-42.4 to 33%)    |
|                                            | Subarachnoid haemorrhage                | 64.8% (52.2–74.6%) | 32.1 (22.1–44.2)      | -33.3% (-60.9 to 14.9%)  | 49.3% (36.9–60.9%) | 0.7 (0.5–1.1)    | -39.1% (-66.7 to 13.5%)  |
|                                            | Neurological disorders*                 | 6.7% (2.1–14.9%)   | 95.3 (26.6–234.5)     | 80.6% (39 to 174.5%)     | 15.9% (5.5–29.2%)  | 6.2 (1.1–18.2)   | 83.7% (34.5 to 204.7%)   |
| High fasting plasma glucose                | Alzheimer's disease and other dementias | 24.4% (10.8–40.6%) | 95.3 (26.6–234.5)     | 80.6% (39 to 174.5%)     | 23.7% (10.5–39.5%) | 6.2 (1.1–18.2)   | 83.7% (34.5 to 204.7%)   |
|                                            | Stroke                                  | 29.9% (20.7–43.3%) | 631.4 (410.5–929.6)   | -5.6% (-34.8 to 38.4%)   | 29.6% (18.6–47.4%) | 30.4 (18.7–50.8) | -16.7% (-43 to 22.1%)    |
|                                            | Ischaemic stroke                        | 30.7% (17.8–51.3%) | 399.1 (223.9–669.2)   | 4.8% (-30.8 to 55.8%)    | 29.6% (15.7–56.4%) | 20.8 (10.6–40.5) | -8.6% (-38.9 to 39.8%)   |
|                                            | Intracerebral haemorrhage               | 28.8% (18.8–40.7%) | 220.7 (135.3–329.7)   | -18.5% (-46.5 to 23.6%)  | 29.6% (19.4–42.7%) | 9.2 (5.6–13.9)   | -29.3% (-53.7 to 7.7%)   |
|                                            | Subarachnoid haemorrhage                | 23.3% (15.2–33%)   | 11.5 (6.6–17.8)       | -33.7% (-64.4 to 18.3%)  | 26.8% (18–38.2%)   | 0.4 (0.2–0.6)    | -44.4% (-72 to 5.4%)     |
|                                            | Neurological disorders*                 | 4.6% (0.9–12.6%)   | 65 (12–204.8)         | 46.8% (25.6 to 93.8%)    | 11.2% (2.5–25.7%)  | 4.4 (0.5–15.7)   | 45.5% (19.5 to 117.4%)   |
| High LDL cholesterol                       | Alzheimer's disease and other dementias | 16.7% (4.3–33.4%)  | 65 (12–204.8)         | 46.8% (25.6 to 93.8%)    | 16.7% (4.4–33.7%)  | 4.4 (0.5–15.7)   | 45.5% (19.5 to 117.4%)   |
|                                            | Stroke                                  | 14.7% (8.7–23.9%)  | 310.6 (174.2–522.4)   | 10.2% (-18 to 52.2%)     | 13.4% (5.3–27%)    | 13.8 (5.3–29)    | -0.6% (-27.2 to 39.4%)   |
| High systolic blood pressure               | Ischaemic stroke                        | 23.9% (14.3–39.3%) | 310.6 (174.2–522.4)   | 10.2% (-18 to 52.2%)     | 19.7% (7.7–39.5%)  | 13.8 (5.3–29)    | -0.6% (-27.2 to 39.4%)   |
|                                            | Stroke                                  | 53.5% (45.7–61%)   | 1131.9 (852.2–1403.6) | -24.5% (-44.5 to 3.1%)   | 50.5% (41.7–59.4%) | 51.8 (37.5–65.5) | -26.8% (-46.5 to 0.2%)   |
|                                            | Ischaemic stroke                        | 50.5% (40.3–60.2%) | 657.2 (476.9–832.7)   | -9.5% (-32.6 to 18.4%)   | 47.4% (36.3–59.7%) | 33.2 (22.9–44.8) | -14% (-37.6 to 17.5%)    |
| High temperature                           | Intracerebral haemorrhage               | 58.6% (48.3–68.2%) | 448.2 (329.1–577.7)   | -37.8% (-55.9 to -7.2%)  | 57.3% (45.8–68%)   | 17.8 (12.9–23.1) | -41.4% (-58.4 to -13.1%) |
|                                            | Subarachnoid haemorrhage                | 53.5% (42.8–64.1%) | 26.5 (18.1–36.4)      | -50.4% (-72.4 to -16.5%) | 54.9% (44.2–65.3%) | 0.8 (0.5–1.2)    | -54.7% (-76.5 to -19.3%) |
|                                            | Stroke                                  | 3.5% (1.3–6.3%)    | 74.1 (26.3–139.7)     | -15.7% (-58 to 46.5%)    | 4.1% (1.5–7.4%)    | 4.2 (1.5–7.8)    | -15.3% (-56.4 to 41.1%)  |
|                                            | Ischaemic stroke                        | 3.4% (1.2–6.1%)    | 44 (15.6–82.9)        | -1.8% (-55.6 to 66%)     | 4.1% (1.5–7.4%)    | 2.9 (1–5.4)      | -3.2% (-53.8 to 60.3%)   |
|                                            | Intracerebral haemorrhage               | 3.7% (1.3–6.7%)    | 28.4 (9.9–53.7)       | -28.9% (-67.1 to 25%)    | 4.1% (1.5–7.4%)    | 1.3 (0.5–2.4)    | -32.4% (-66.6 to 15.8%)  |
|                                            | Subarachnoid haemorrhage                | 3.4% (1.2–6.1%)    | 1.7 (0.6–3.1)         | -46% (-78.6 to 2.9%)     | 4.1% (1.5–7.4%)    | 0.1 (0–0.1)      | -46.6% (-78.6 to 1.2%)   |
| Household air pollution from solid fuels   | Meningitis                              | 0% (0–0%)          | <0.1 (<0.1–<0.1)      | -100% (-100 to -99.8%)   | 0% (0–0%)          | <0.1 (<0.1–<0.1) | -100% (-100 to -99.8%)   |
|                                            | Encephalitis                            | 0% (0–0%)          | <0.1 (<0.1–<0.1)      | -99.7% (-100 to -98.9%)  | 0% (0–0%)          | <0.1 (<0.1–<0.1) | -99.7% (-100 to -98.9%)  |
|                                            | Stroke                                  | 0.1% (0–0.2%)      | 1.6 (0.4–4.4)         | -99.7% (-99.9 to -99%)   | 0.1% (0–0.2%)      | 0.1 (0–0.2)      | -99.7% (-99.9 to -99.1%) |
|                                            | Ischaemic stroke                        | 0.1% (0–0.2%)      | 0.9 (0.2–2.5)         | -99.6% (-99.9 to -98.9%) | 0.1% (0–0.2%)      | <0.1 (<0.1–0.1)  | -99.7% (-99.9 to -99%)   |
|                                            | Intracerebral haemorrhage               | 0.1% (0–0.2%)      | 0.6 (0.1–1.7)         | -99.7% (-99.9 to -99.1%) | 0.1% (0–0.2%)      | <0.1 (<0.1–0.1)  | -99.8% (-99.9 to -99.2%) |
|                                            | Subarachnoid haemorrhage                | 0.1% (0–0.2%)      | <0.1 (<0.1–0.1)       | -99.8% (-99.9 to -99.3%) | 0.1% (0–0.2%)      | <0.1 (<0.1–<0.1) | -99.8% (-100 to -99.4%)  |



**Table S16** Regional and national disabilities and deaths related to neurological conditions attributable to risk factors in North Africa and Middle East countries

| Location<br>Risk factor (alphabetic order) | Cause                                   | DALYs (95% UI)     |                        |                          | Deaths (95% UI)    |                  |                          |
|--------------------------------------------|-----------------------------------------|--------------------|------------------------|--------------------------|--------------------|------------------|--------------------------|
|                                            |                                         | PAF (%)            | Rate per 100,000       | Rate change (%)          | PAF (%)            | Rate per 100,000 | Rate change (%)          |
|                                            |                                         | 2019               | 2019                   | From 1990 to 2019        | 2019               | 2019             | From 1990 to 2019        |
| Kidney dysfunction                         | Stroke                                  | 13.5% (10.7–16.1%) | 285.8 (208–363.4)      | 4.8% (-21.4 to 39.7%)    | 12.5% (8.5–16.3%)  | 12.9 (8.3–17.3)  | -1.7% (-29.5 to 31.7%)   |
|                                            | Ischaemic stroke                        | 15% (10.8–18.7%)   | 194.8 (132.1–257.6)    | 22.1% (-8.9 to 58.3%)    | 12.4% (6.9–17.2%)  | 8.7 (4.7–12.6)   | 11.6% (-24 to 49.5%)     |
|                                            | Intracerebral haemorrhage               | 11.9% (9.6–14.5%)  | 91.1 (64.9–118.7)      | -19.5% (-42.4 to 17.2%)  | 13.3% (10.2–16.4%) | 4.1 (2.8–5.4)    | -21.5% (-43.3 to 13.3%)  |
| Lead exposure                              | Stroke                                  | 3.9% (1.9–6.1%)    | 82.9 (40–132.5)        | -47.8% (-64.1 to -28.8%) | 4.1% (2.2–6.2%)    | 4.2 (2.2–6.6)    | -41.9% (-58.4 to -20.8%) |
|                                            | Ischaemic stroke                        | 3.8% (1.9–5.9%)    | 50 (24.7–78.4)         | -32.3% (-51.5 to -12.4%) | 3.9% (2.1–6.1%)    | 2.7 (1.4–4.5)    | -27.9% (-47.7 to -4.8%)  |
|                                            | Intracerebral haemorrhage               | 4.1% (1.8–6.8%)    | 31.4 (13.5–54)         | -60.5% (-75 to -41.4%)   | 4.5% (2.3–7%)      | 1.4 (0.7–2.3)    | -56.6% (-69.8 to -37.2%) |
| Subarachnoid haemorrhage                   | Subarachnoid haemorrhage                | 3.1% (1.2–5.6%)    | 1.6 (0.5–3)            | -72.8% (-88.2 to -52.3%) | 3.9% (1.9–6.4%)    | 0.1 (0–0.1)      | -68.7% (-85.5 to -44%)   |
|                                            | Meningitis                              | 0.4% (0.2–0.6%)    | 0.1 (0.1–0.2)          | -90.7% (-95.7 to -81.1%) | 0.1% (0.1–0.2%)    | <0.1 (<0.1–<0.1) | -90.7% (-95.7 to -81.1%) |
|                                            | Encephalitis                            | 0.4% (0.1–1.5%)    | 0.1 (0–0.5)            | -51% (-88 to 4.6%)       | 0.2% (0–0.8%)      | <0.1 (<0.1–<0.1) | -51% (-88 to 4.6%)       |
| Low birth weight and short gestation       | Meningitis                              | 0.4% (0.2–0.7%)    | 0.1 (0.1–0.2)          | -90.2% (-95.5 to -80.2%) | 0.1% (0.1–0.3%)    | <0.1 (<0.1–<0.1) | -90.2% (-95.5 to -80.2%) |
|                                            | Encephalitis                            | 0.5% (0.1–1.7%)    | 0.1 (0–0.6)            | -48.4% (-87.3 to 10.2%)  | 0.2% (0.1–0.9%)    | <0.1 (<0.1–<0.1) | -48.4% (-87.3 to 10.2%)  |
| Low physical activity                      | Stroke                                  | 7.5% (1.9–14.3%)   | 159.9 (40.9–298.4)     | 2.3% (-24.2 to 50.2%)    | 8.9% (2.6–16%)     | 9.2 (2.6–16.5)   | -9.8% (-34 to 32.2%)     |
|                                            | Ischaemic stroke                        | 12.3% (3.1–23%)    | 159.9 (40.9–298.4)     | 2.3% (-24.2 to 50.2%)    | 13.1% (3.8–23.4%)  | 9.2 (2.6–16.5)   | -9.8% (-34 to 32.2%)     |
| Low temperature                            | Stroke                                  | 3.1% (-0.2–6.5%)   | 66.3 (-4.6–142.4)      | -37.3% (-73.4 to 7.3%)   | 3.6% (-0.3–7.5%)   | 3.7 (-0.3–8)     | -37.1% (-73.4 to 2%)     |
|                                            | Ischaemic stroke                        | 3% (-0.2–6.3%)     | 39.3 (-2.7–84.1)       | -26.9% (-70.4 to 17.6%)  | 3.6% (-0.3–7.5%)   | 2.6 (-0.2–5.5)   | -28% (-70.1 to 16.8%)    |
|                                            | Intracerebral haemorrhage               | 3.3% (-0.2–6.9%)   | 25.4 (-1.8–55.6)       | -47.2% (-78.3 to -6.1%)  | 3.6% (-0.3–7.5%)   | 1.1 (-0.1–2.5)   | -49.9% (-78.7 to -12.6%) |
|                                            | Subarachnoid haemorrhage                | 3% (-0.2–6.2%)     | 1.5 (-0.1–3.4)         | -59.8% (-85.7 to -20.3%) | 3.6% (-0.3–7.5%)   | 0.1 (0–0.1)      | -60.3% (-85.8 to -23.7%) |
|                                            | Neurological disorders*                 | 10.2% (3.7–21.5%)  | 144.4 (44.8–358.4)     | 58.3% (28.7 to 123.6%)   | 24.5% (9.9–41.3%)  | 9.6 (1.7–27.9)   | 58.8% (24 to 147.9%)     |
| Metabolic risk factors†                    | Alzheimer's disease and other dementias | 37% (19.4–56.2%)   | 144.4 (44.8–358.4)     | 58.3% (28.7 to 123.6%)   | 36.5% (18.8–55.9%) | 9.6 (1.7–27.9)   | 58.8% (24 to 147.9%)     |
|                                            | Stroke                                  | 77.8% (71.5–83.8%) | 1645.9 (1293.6–1954.6) | -20.7% (-40.7 to 6.7%)   | 73.5% (64.6–81.9%) | 75.5 (57.1–91.8) | -24.8% (-44.6 to 1.9%)   |
| Non-optimal temperature                    | Ischaemic stroke                        | 77% (68.8–85.5%)   | 1001.6 (772–1200.6)    | -7.2% (-30.3 to 21.9%)   | 72.1% (61–84.8%)   | 50.5 (36.6–63.6) | -13.7% (-36.4 to 16.6%)  |
|                                            | Intracerebral haemorrhage               | 79.4% (72–85.2%)   | 607.3 (466.3–753.3)    | -34.4% (-53.2 to -2.7%)  | 76.7% (68.4–83.8%) | 23.9 (18.2–29.7) | -39.5% (-56.3 to -11%)   |
|                                            | Subarachnoid haemorrhage                | 74.8% (66.1–81.6%) | 37 (26.5–50)           | -45.8% (-69.2 to -9.4%)  | 72.8% (63.6–80.4%) | 1.1 (0.7–1.5)    | -52.4% (-74.7 to -14.7%) |
|                                            | Stroke                                  | 6.5% (2.9–9.9%)    | 137.8 (57.6–221.2)     | -27.6% (-55.9 to 22.4%)  | 7.6% (3.4–11.4%)   | 7.8 (3.3–12.3)   | -27.3% (-54.9 to 19.1%)  |
|                                            | Ischaemic stroke                        | 6.3% (2.8–9.6%)    | 81.8 (33.8–130)        | -15.6% (-50.2 to 40.2%)  | 7.6% (3.4–11.4%)   | 5.3 (2.3–8.4)    | -16.8% (-49 to 37.6%)    |
| Other environmental risks                  | Intracerebral haemorrhage               | 6.9% (3.1–10.5%)   | 52.8 (21.7–86.3)       | -39% (-62.7 to 7.1%)     | 7.6% (3.4–11.4%)   | 2.4 (1–3.8)      | -42.1% (-63.6 to 0.8%)   |
|                                            | Subarachnoid haemorrhage                | 6.3% (2.7–9.6%)    | 3.1 (1.2–5.4)          | -53.6% (-76.5 to -4.7%)  | 7.6% (3.4–11.4%)   | 0.1 (0–0.2)      | -54.1% (-76.7 to -7.4%)  |
|                                            | Stroke                                  | 3.9% (1.9–6.1%)    | 82.9 (40–132.5)        | -47.8% (-64.1 to -28.8%) | 4.1% (2.2–6.2%)    | 4.2 (2.2–6.6)    | -41.9% (-58.4 to -20.8%) |
|                                            | Ischaemic stroke                        | 3.8% (1.9–5.9%)    | 50 (24.7–78.4)         | -32.3% (-51.5 to -12.4%) | 3.9% (2.1–6.1%)    | 2.7 (1.4–4.5)    | -27.9% (-47.7 to -4.8%)  |
| Particulate matter pollution               | Intracerebral haemorrhage               | 4.1% (1.8–6.8%)    | 31.4 (13.5–54)         | -60.5% (-75 to -41.4%)   | 4.5% (2.3–7%)      | 1.4 (0.7–2.3)    | -56.6% (-69.8 to -37.2%) |
|                                            | Subarachnoid haemorrhage                | 3.1% (1.2–5.6%)    | 1.6 (0.5–3)            | -72.8% (-88.2 to -52.3%) | 3.9% (1.9–6.4%)    | 0.1 (0–0.1)      | -68.7% (-85.5 to -44%)   |
|                                            | Meningitis                              | 0.1% (0–0.2%)      | <0.1 (<0.1–0.1)        | -90% (-96.4 to -74.6%)   | 0% (0–0.1%)        | <0.1 (<0.1–<0.1) | -90.1% (-96.4 to -74.6%) |

**Table S16** Regional and national disabilities and deaths related to neurological conditions attributable to risk factors in North Africa and Middle East countries

| Location<br>Risk factor (alphabetic order) | Cause                                   | DALYs (95% UI)     |                     |                          | Deaths (95% UI)          |                  |                          |                          |
|--------------------------------------------|-----------------------------------------|--------------------|---------------------|--------------------------|--------------------------|------------------|--------------------------|--------------------------|
|                                            |                                         | PAF (%)            | Rate per 100,000    | Rate change (%)          | PAF (%)                  | Rate per 100,000 | Rate change (%)          |                          |
|                                            |                                         | 2019               | 2019                | From 1990 to 2019        | 2019                     | 2019             | From 1990 to 2019        |                          |
| Secondhand smoke                           | Encephalitis                            | 0.1% (0–0.5%)      | <0.1 (<0.1–0.2)     | -49.5% (-89.5 to 45.4%)  | 0.1% (0–0.3%)            | <0.1 (<0.1–<0.1) | -49.5% (-89.6 to 45.2%)  |                          |
|                                            | Stroke                                  | 35.8% (31.6–39.7%) | 756.8 (587–933.1)   | -27.8% (-47.1 to -2.5%)  | 30.5% (26.7–34.2%)       | 31.4 (23.9–38.6) | -32.9% (-50.5 to -7.9%)  |                          |
|                                            | Ischaemic stroke                        | 33.7% (29.6–37.6%) | 438.6 (340.4–538.6) | -15.3% (-36.7 to 9.4%)   | 28.7% (25–32.4%)         | 20.2 (15.2–24.9) | -23% (-43.4 to 3.2%)     |                          |
|                                            | Intracerebral haemorrhage               | 38.9% (34.3–43%)   | 297.9 (227.2–374.6) | -39.3% (-57.9 to -10.2%) | 34.3% (30.1–38.2%)       | 10.7 (8–13.4)    | -44.9% (-61.1 to -18.4%) |                          |
|                                            | Subarachnoid haemorrhage                | 40.9% (36–45.4%)   | 20.3 (14.5–27.1)    | -49.4% (-70.7 to -14.8%) | 36.2% (31.7–40.5%)       | 0.5 (0.4–0.7)    | -56.3% (-76.5 to -22%)   |                          |
|                                            | Stroke                                  | 4.1% (3.1–5.1%)    | 86.4 (59.2–115.7)   | -29.8% (-49.7 to -0.8%)  | 3.4% (2.6–4.2%)          | 3.5 (2.4–4.6)    | -33.4% (-52.3 to -6.9%)  |                          |
|                                            | Ischaemic stroke                        | 3.6% (2.7–4.5%)    | 47 (32.2–63.1)      | -16.3% (-40.4 to 13.6%)  | 3% (2.3–3.8%)            | 2.1 (1.4–2.8)    | -22.7% (-44.7 to 6.3%)   |                          |
|                                            | Intracerebral haemorrhage               | 4.8% (3.6–6.1%)    | 36.7 (24.7–50.7)    | -40.2% (-59.2 to -10.2%) | 4.1% (3–5.1%)            | 1.3 (0.8–1.7)    | -44.7% (-61.3 to -18%)   |                          |
|                                            | Subarachnoid haemorrhage                | 5.5% (4.1–7.2%)    | 2.7 (1.7–4)         | -50.8% (-72.9 to -14.2%) | 4.8% (3.6–6%)            | 0.1 (0–0.1)      | -56% (-76.3 to -19.6%)   |                          |
| Short gestation                            | Meningitis                              | 0.3% (0.2–0.6%)    | 0.1 (0.1–0.2)       | -87.2% (-94 to -73.9%)   | 0.1% (0.1–0.2%)          | <0.1 (<0.1–<0.1) | -87.2% (-94 to -73.9%)   |                          |
|                                            | Encephalitis                            | 0.4% (0.1–1.4%)    | 0.1 (0–0.5)         | -32.5% (-83 to 41.2%)    | 0.2% (0–0.8%)            | <0.1 (<0.1–<0.1) | -32.5% (-83 to 41.2%)    |                          |
| Smoking                                    | Stroke                                  | 11.4% (9.8–13.3%)  | 242.5 (174.3–305.2) | -19.7% (-44.4 to 19%)    | 7.9% (6.6–9.4%)          | 8.2 (5.8–10.3)   | -24.6% (-48.4 to 11%)    |                          |
|                                            | Ischaemic stroke                        | 10% (8.5–11.6%)    | 129.7 (92.2–161.9)  | -2.8% (-33.5 to 36.1%)   | 6.6% (5.5–7.9%)          | 4.7 (3.2–5.8)    | -10.9% (-40.4 to 27.8%)  |                          |
|                                            | Intracerebral haemorrhage               | 13.9% (11.9–16.3%) | 106.9 (78.5–140.5)  | -32.2% (-55 to 8.2%)     | 10.8% (9–12.7%)          | 3.4 (2.4–4.4)    | -36.5% (-57.8 to 1.4%)   |                          |
|                                            | Subarachnoid haemorrhage                | 12% (9.3–14.9%)    | 6 (3.9–8.4)         | -45.9% (-74.1 to 2.4%)   | 10.1% (7.6–12.6%)        | 0.2 (0.1–0.2)    | -51.9% (-79.1 to -0.9%)  |                          |
|                                            | Neurological disorders*                 | 2.5% (0.8–5.6%)    | 35.9 (9.9–94)       | 2.8% (-27.6 to 47.7%)    | 4.4% (0.6–8.5%)          | 1.8 (0.1–5.8)    | -0.7% (-41.9 to 76.4%)   |                          |
|                                            | Alzheimer's disease and other dementias | 10.6% (6.3–15.5%)  | 41.4 (15.4–99)      | 2.7% (-25.9 to 43.7%)    | 8.3% (4.9–12.3%)         | 2.2 (0.5–6.2)    | -0.4% (-30.4 to 52.6%)   |                          |
|                                            | Parkinson's disease                     | -5.9% (-8.8–3.2%)  | -6.5 (-10.1–3.2)    | 7.7% (-29.9 to 74.6%)    | -4.9% (-7.4–2.6%)        | -0.4 (-0.6–0.2)  | 2.2% (-35.4 to 73.7%)    |                          |
|                                            | Multiple sclerosis                      | 8.9% (6.4–11.9%)   | 1 (0.7–1.5)         | 56.6% (9.9 to 129.6%)    | 10% (7.1–13.5%)          | <0.1 (<0.1–<0.1) | 61.4% (-19.4 to 275.5%)  |                          |
|                                            | Stroke                                  | 15.1% (13.2–17%)   | 318.8 (233.6–399.3) | -22.5% (-45.1 to 10.2%)  | 11% (9.5–12.6%)          | 11.3 (8.2–14)    | -27.4% (-48.9 to 3.4%)   |                          |
| Tobacco                                    | Ischaemic stroke                        | 13.2% (11.5–15%)   | 171.6 (126–213.5)   | -6.8% (-34.6 to 28.8%)   | 9.4% (8–10.9%)           | 6.6 (4.7–8.2)    | -15% (-41.5 to 18.7%)    |                          |
|                                            | Intracerebral haemorrhage               | 18.1% (15.9–20.5%) | 138.8 (102–176.2)   | -34.4% (-55.3 to 2.7%)   | 14.3% (12.5–16.5%)       | 4.5 (3.2–5.6)    | -39% (-57.6 to -5.1%)    |                          |
|                                            | Subarachnoid haemorrhage                | 17% (14.4–19.8%)   | 8.4 (5.7–11.5)      | -47.4% (-72.7 to -7.2%)  | 14.4% (12.1–16.9%)       | 0.2 (0.1–0.3)    | -53.2% (-77.7 to -13.2%) |                          |
|                                            | Neurological disorders*                 | 2.5% (0.8–5.6%)    | 35.9 (9.9–94)       | 2.8% (-27.6 to 47.7%)    | 4.4% (0.6–8.5%)          | 1.8 (0.1–5.8)    | -0.7% (-41.9 to 76.4%)   |                          |
|                                            | Alzheimer's disease and other dementias | 10.6% (6.3–15.5%)  | 41.4 (15.4–99)      | 2.7% (-25.9 to 43.7%)    | 8.3% (4.9–12.3%)         | 2.2 (0.5–6.2)    | -0.4% (-30.4 to 52.6%)   |                          |
|                                            | Parkinson's disease                     | -5.9% (-8.8–3.2%)  | -6.5 (-10.1–3.2)    | 7.7% (-29.9 to 74.6%)    | -4.9% (-7.4–2.6%)        | -0.4 (-0.6–0.2)  | 2.2% (-35.4 to 73.7%)    |                          |
|                                            | Multiple sclerosis                      | 8.9% (6.4–11.9%)   | 1 (0.7–1.5)         | 56.6% (9.9 to 129.6%)    | 10% (7.1–13.5%)          | <0.1 (<0.1–<0.1) | 61.4% (-19.4 to 275.5%)  |                          |
|                                            | <b>Syrian Arab Republic</b>             |                    |                     |                          |                          |                  |                          |                          |
|                                            | Air pollution                           | Meningitis         | 0.4% (0.1–0.7%)     | 0.4 (0.1–0.7)            | -86.9% (-96.5 to -57.2%) | 0.2% (0.1–0.5%)  | <0.1 (<0.1–<0.1)         | -86.9% (-96.5 to -57.2%) |
| Encephalitis                               |                                         | 0.2% (0.1–0.4%)    | 0.1 (0–0.1)         | -57.7% (-88.5 to 38.5%)  | 0.1% (0.1–0.3%)          | <0.1 (<0.1–<0.1) | -57.7% (-88.5 to 38.5%)  |                          |
| Stroke                                     |                                         | 23.3% (19.3–27.5%) | 471.7 (341.1–628.8) | -41.4% (-57.1 to -18.4%) | 20.1% (16.3–24%)         | 20 (14.1–26.9)   | -37.9% (-55 to -12%)     |                          |

**Table S16** Regional and national disabilities and deaths related to neurological conditions attributable to risk factors in North Africa and Middle East countries

| Location<br>Risk factor (alphabetic order) | Cause                                   | DALYs (95% UI)       |                      |                          | Deaths (95% UI)    |                   |                          |
|--------------------------------------------|-----------------------------------------|----------------------|----------------------|--------------------------|--------------------|-------------------|--------------------------|
|                                            |                                         | PAF (%)              | Rate per 100,000     | Rate change (%)          | PAF (%)            | Rate per 100,000  | Rate change (%)          |
|                                            |                                         | 2019                 | 2019                 | From 1990 to 2019        | 2019               | 2019              | From 1990 to 2019        |
| Alcohol use                                | Ischaemic stroke                        | 22.5% (18.4–26.6%)   | 241.2 (177.7–320.5)  | -28.9% (-47.7 to -3.3%)  | 19.1% (15.5–23%)   | 11.1 (7.8–15)     | -27% (-48.1 to 1.7%)     |
|                                            | Intracerebral haemorrhage               | 25.3% (20.9–29.8%)   | 213 (149.9–290.3)    | -50.6% (-64.6 to -28.5%) | 21.9% (17.9–26%)   | 8.3 (5.8–11.4)    | -47.2% (-62.2 to -24.7%) |
|                                            | Subarachnoid haemorrhage                | 16.1% (12.6–20.1%)   | 17.6 (12.4–24.3)     | -51% (-68.6 to -18.4%)   | 18.7% (15.1–22.5%) | 0.5 (0.4–0.8)     | -54.5% (-72.9 to -19.2%) |
|                                            | Stroke                                  | 0.7% (0.4–1.1%)      | 14.7 (7.1–24.5)      | -65.3% (-81 to -46%)     | 0.5% (0.2–0.9%)    | 0.5 (0.2–0.9)     | -63.1% (-81.5 to -40.4%) |
|                                            | Ischaemic stroke                        | 0.3% (0–0.5%)        | 2.8 (0.3–5.9)        | -58.7% (-91.3 to -31.3%) | 0.2% (0–0.4%)      | 0.1 (0–0.3)       | -57.9% (-99.1 to -22.7%) |
| All risk factors                           | Intracerebral haemorrhage               | 1.4% (0.7–2.2%)      | 12 (6–20.3)          | -66.5% (-81.1 to -47.7%) | 1.1% (0.6–1.8%)    | 0.4 (0.2–0.7)     | -64.3% (-80.8 to -44%)   |
|                                            | Neurological disorders*                 | 0.1% (0–0.3%)        | 1.6 (0.6–2.9)        | -52.2% (-79.7 to 11%)    | 0% (0–0.1%)        | <0.1 (<0.1–<0.1)  | -56.6% (-73.5 to -23.2%) |
|                                            | Idiopathic epilepsy                     | 1.5% (0.8–2.3%)      | 1.6 (0.6–2.9)        | -52.2% (-79.7 to 11%)    | 2.1% (1.2–3.2%)    | <0.1 (<0.1–<0.1)  | -56.6% (-73.5 to -23.2%) |
|                                            | Meningitis                              | 2.7% (1.5–4.4%)      | 2.6 (1.4–4.6)        | -86.3% (-93.7 to -69.1%) | 1.7% (0.9–2.9%)    | <0.1 (<0.1–0.1)   | -86.3% (-93.7 to -69.1%) |
|                                            | Encephalitis                            | 1.5% (0.9–2.2%)      | 0.4 (0.2–0.7)        | -55.2% (-79.4 to -8.7%)  | 1% (0.6–1.5%)      | <0.1 (<0.1–<0.1)  | -55.2% (-79.4 to -8.7%)  |
|                                            | Stroke                                  | 84.6% (80.9–88.2%)   | 1708.5 (1346–2186.7) | -34.5% (-51.5 to -11%)   | 84% (78.9–89.6%)   | 83.2 (64.5–105.4) | -29.3% (-48.7 to -2.3%)  |
|                                            | Ischaemic stroke                        | 86.9% (81.6–92.9%)   | 929.5 (736.2–1168.7) | -21.4% (-42.4 to 4%)     | 84.5% (77.1–93.1%) | 49.3 (37.9–63.1)  | -18.2% (-41.7 to 11.3%)  |
|                                            | Intracerebral haemorrhage               | 85.8% (81.8–89.4%)   | 719.8 (547.7–944.6)  | -44.9% (-60.4 to -21.9%) | 84.4% (78.6–89.9%) | 32 (24.1–42)      | -40.2% (-57.1 to -16.3%) |
|                                            | Subarachnoid haemorrhage                | 54.1% (47–61.6%)     | 59.1 (44.6–77.5)     | -50.4% (-67.7 to -20.4%) | 68.8% (62–75.7%)   | 2 (1.4–2.7)       | -51% (-70.3 to -16.8%)   |
|                                            | Neurological disorders*                 | 12.2% (4.5–24.2%)    | 159.1 (58.7–402)     | 12.5% (-10 to 45.8%)     | 28.1% (13.7–43.3%) | 10.1 (1.8–31.1)   | 16.9% (-10.6 to 76.3%)   |
| Ambient particulate matter pollution       | Alzheimer's disease and other dementias | 42% (27.9–57%)       | 164.3 (63.2–409.6)   | 11.6% (-10.6 to 43.4%)   | 40.7% (26.6–55.5%) | 10.6 (2.3–31.7)   | 15% (-12.5 to 65.3%)     |
|                                            | Parkinson's disease                     | -10.1% (-15.7–-5.2%) | -8.5 (-14–3.9)       | -22.7% (-45.7 to 10%)    | -9% (-14.2–-4.5%)  | -0.5 (-0.8–0.2)   | -17.2% (-43.7 to 25.2%)  |
|                                            | Idiopathic epilepsy                     | 1.5% (0.8–2.3%)      | 1.6 (0.6–2.9)        | -52.2% (-79.7 to 11%)    | 2.1% (1.2–3.2%)    | <0.1 (<0.1–<0.1)  | -56.6% (-73.5 to -23.2%) |
|                                            | Multiple sclerosis                      | 11.4% (8.4–14.4%)    | 1.7 (1.1–2.5)        | -7.3% (-31.4 to 18.8%)   | 13.2% (9.7–17.4%)  | <0.1 (<0.1–<0.1)  | -14.4% (-50.9 to 41.3%)  |
|                                            | Meningitis                              | 0.4% (0.1–0.7%)      | 0.4 (0.1–0.7)        | -84% (-95.9 to -47.3%)   | 0.2% (0.1–0.5%)    | <0.1 (<0.1–<0.1)  | -84% (-95.9 to -47.3%)   |
|                                            | Encephalitis                            | 0.2% (0.1–0.4%)      | 0.1 (0–0.1)          | -48.6% (-86 to 76.9%)    | 0.1% (0.1–0.3%)    | <0.1 (<0.1–<0.1)  | -48.6% (-86 to 76.9%)    |
|                                            | Stroke                                  | 23.3% (19.2–27.4%)   | 470.9 (340.7–628)    | -31.2% (-50.1 to -2.5%)  | 20.1% (16.3–24%)   | 19.9 (14.1–26.8)  | -26.9% (-48.7 to 4.4%)   |
|                                            | Ischaemic stroke                        | 22.5% (18.4–26.6%)   | 240.7 (177.5–320.1)  | -16.3% (-39.9 to 16.3%)  | 19.1% (15.5–23%)   | 11.1 (7.8–14.9)   | -14% (-39.3 to 22.4%)    |
|                                            | Intracerebral haemorrhage               | 25.3% (20.9–29.7%)   | 212.7 (149.5–289.8)  | -42% (-59.9 to -14%)     | 21.8% (17.9–25.9%) | 8.3 (5.8–11.3)    | -38% (-57.3 to -8.2%)    |
|                                            | Subarachnoid haemorrhage                | 16% (12.6–20.1%)     | 17.5 (12.4–24.3)     | -42.3% (-63.7 to -1.9%)  | 18.7% (15.1–22.4%) | 0.5 (0.4–0.8)     | -46.4% (-67.6 to -2.7%)  |
| Behavioural risk factors‡                  | Meningitis                              | 2.6% (1.4–4.3%)      | 2.6 (1.4–4.4)        | -86.2% (-93.6 to -68.9%) | 1.7% (0.9–2.8%)    | <0.1 (<0.1–<0.1)  | -86.2% (-93.6 to -68.9%) |
|                                            | Encephalitis                            | 1.5% (0.9–2.2%)      | 0.4 (0.2–0.7)        | -55% (-79.3 to -7.4%)    | 0.9% (0.6–1.4%)    | <0.1 (<0.1–<0.1)  | -55% (-79.4 to -7.4%)    |
|                                            | Stroke                                  | 37.1% (32.6–42%)     | 749.7 (564.3–986.7)  | -39.3% (-55.7 to -16%)   | 33.3% (28.4–38.6%) | 33 (24.4–43.1)    | -34.7% (-53.2 to -9.6%)  |
|                                            | Ischaemic stroke                        | 39.2% (32.9–46%)     | 420.1 (313.1–543.4)  | -26.8% (-46.6 to -2.1%)  | 35.1% (28.3–42.6%) | 20.5 (14.7–27.4)  | -23.6% (-45.7 to 4.2%)   |
|                                            | Intracerebral haemorrhage               | 36.4% (30.8–42.2%)   | 305.6 (217.7–415.7)  | -50.2% (-64.7 to -27.8%) | 31% (25.8–36.6%)   | 11.7 (8.3–15.8)   | -46.8% (-61.9 to -23.2%) |
|                                            | Subarachnoid haemorrhage                | 22% (17.3–27.3%)     | 24 (17.3–33.6)       | -50% (-69.2 to -16.2%)   | 25.9% (20.9–31.7%) | 0.7 (0.5–1.1)     | -53% (-73.1 to -16.5%)   |
|                                            | Neurological disorders*                 | 5.1% (1.8–10.7%)     | 66.9 (22.3–162.1)    | -15.9% (-35.2 to 10.5%)  | 11.2% (3.5–18.3%)  | 4.1 (0.5–12.2)    | -10.4% (-38.9 to 35.8%)  |

**Table S16** Regional and national disabilities and deaths related to neurological conditions attributable to risk factors in North Africa and Middle East countries

| Location<br>Risk factor (alphabetic order) | Cause                                   | DALYs (95% UI)       |                     |                          | Deaths (95% UI)    |                  |                          |
|--------------------------------------------|-----------------------------------------|----------------------|---------------------|--------------------------|--------------------|------------------|--------------------------|
|                                            |                                         | PAF (%)              | Rate per 100,000    | Rate change (%)          | PAF (%)            | Rate per 100,000 | Rate change (%)          |
|                                            |                                         | 2019                 | 2019                | From 1990 to 2019        | 2019               | 2019             | From 1990 to 2019        |
| Child and maternal malnutrition            | Alzheimer's disease and other dementias | 18.5% (11.7–25.1%)   | 72.1 (27.4–168.2)   | -15.6% (-34.6 to 10%)    | 17.7% (11–24.6%)   | 4.6 (1–12.8)     | -10.9% (-35.1 to 25.8%)  |
|                                            | Parkinson's disease                     | -10.1% (-15.7–-5.2%) | -8.5 (-14–-3.9)     | -22.7% (-45.7 to 10%)    | -9% (-14.2–-4.5%)  | -0.5 (-0.8–0.2)  | -17.2% (-43.7 to 25.2%)  |
|                                            | Idiopathic epilepsy                     | 1.5% (0.8–2.3%)      | 1.6 (0.6–2.9)       | -52.2% (-79.7 to 11%)    | 2.1% (1.2–3.2%)    | <0.1 (<0.1–<0.1) | -56.6% (-73.5 to -23.2%) |
|                                            | Multiple sclerosis                      | 11.4% (8.4–14.4%)    | 1.7 (1.1–2.5)       | -7.3% (-31.4 to 18.8%)   | 13.2% (9.7–17.4%)  | <0.1 (<0.1–<0.1) | -14.4% (-50.9 to 41.3%)  |
|                                            | Meningitis                              | 2.6% (1.4–4.3%)      | 2.6 (1.4–4.4)       | -86.2% (-93.6 to -68.9%) | 1.7% (0.9–2.8%)    | <0.1 (<0.1–<0.1) | -86.2% (-93.6 to -68.9%) |
| Diet high in red meat                      | Encephalitis                            | 1.5% (0.9–2.2%)      | 0.4 (0.2–0.7)       | -55% (-79.3 to -7.4%)    | 0.9% (0.6–1.4%)    | <0.1 (<0.1–<0.1) | -55% (-79.4 to -7.4%)    |
|                                            | Stroke                                  | 3.9% (1.4–5.9%)      | 78.1 (30.2–127.1)   | -47.5% (-62.3 to -26.3%) | 3% (1.1–4.6%)      | 3 (1.1–4.9)      | -43.5% (-60.6 to -19%)   |
|                                            | Ischaemic stroke                        | 3.4% (0.6–5.3%)      | 36.1 (5.6–61.2)     | -35.1% (-53.6 to -11.9%) | 2.5% (0.4–4%)      | 1.5 (0.2–2.6)    | -31.9% (-53.6 to -4.3%)  |
|                                            | Intracerebral haemorrhage               | 4.6% (0.6–7.4%)      | 38.6 (5.4–70.3)     | -54.9% (-68.9 to -35.4%) | 3.7% (0.5–6.1%)    | 1.4 (0.2–2.6)    | -51% (-66.1 to -29.5%)   |
| Diet high in sodium                        | Subarachnoid haemorrhage                | 3.1% (0.4–5.1%)      | 3.3 (0.5–5.9)       | -54.3% (-71.2 to -24.4%) | 3.3% (0.5–5.4%)    | 0.1 (0–0.2)      | -57.3% (-75.1 to -25.5%) |
|                                            | Stroke                                  | 1.9% (0.3–7.4%)      | 39 (4.9–159.4)      | -36.9% (-61.4 to 12.4%)  | 1.6% (0.3–6.5%)    | 1.6 (0.2–6.8)    | -32.5% (-58.1 to 22.2%)  |
|                                            | Ischaemic stroke                        | 1.7% (0.3–7%)        | 18.7 (2.7–76.6)     | -23.2% (-55.1 to 40.6%)  | 1.4% (0.3–5.9%)    | 0.8 (0.1–3.6)    | -20.1% (-52.6 to 44.3%)  |
|                                            | Intracerebral haemorrhage               | 2.2% (0.3–8.7%)      | 18.8 (2–76.7)       | -45.7% (-68.6 to -2.8%)  | 1.9% (0.3–7.9%)    | 0.7 (0.1–3.1)    | -41.6% (-66.3 to 5.2%)   |
| Diet low in fibre                          | Subarachnoid haemorrhage                | 1.3% (0.1–5.3%)      | 1.5 (0.1–6)         | -46.1% (-72.4 to 7.6%)   | 1.6% (0.2–6.5%)    | <0.1 (<0.1–0.2)  | -48.7% (-75 to 12.1%)    |
|                                            | Stroke                                  | 3.1% (0.6–6%)        | 63.5 (12.8–129.6)   | -35.2% (-52.9 to -9%)    | 2.8% (0.6–5.2%)    | 2.7 (0.6–5.5)    | -29.3% (-49.4 to 0%)     |
|                                            | Ischaemic stroke                        | 3% (0.6–5.6%)        | 31.8 (6.5–63.8)     | -20.8% (-42.1 to 10%)    | 2.5% (0.6–4.8%)    | 1.5 (0.3–2.9)    | -16.5% (-42.2 to 20.3%)  |
|                                            | Intracerebral haemorrhage               | 3.5% (0.7–6.6%)      | 29.2 (5.7–60.5)     | -45.3% (-60.9 to -20.9%) | 3.1% (0.6–5.9%)    | 1.2 (0.2–2.4)    | -39.5% (-56.2 to -12.9%) |
| Diet low in fruits                         | Subarachnoid haemorrhage                | 2.3% (0.5–4.5%)      | 2.5 (0.5–5.3)       | -44.6% (-64.6 to -8.3%)  | 2.6% (0.6–5.1%)    | 0.1 (0–0.2)      | -48.2% (-69 to -7.8%)    |
|                                            | Stroke                                  | 4.8% (2.2–7.9%)      | 96.4 (44.4–167.8)   | -29.3% (-51 to 1.7%)     | 3.8% (1.8–6.3%)    | 3.8 (1.8–6.6)    | -24.4% (-48.5 to 12.1%)  |
|                                            | Ischaemic stroke                        | 3.5% (0.7–6.8%)      | 38 (7–77.3)         | -7.2% (-35.5 to 36%)     | 2.8% (0.6–5.4%)    | 1.6 (0.3–3.3)    | -5.8% (-37.1 to 44.1%)   |
|                                            | Intracerebral haemorrhage               | 6.4% (2.9–12%)       | 53.8 (23.5–103.3)   | -38.8% (-57.9 to -9.4%)  | 5.4% (2.4–10.1%)   | 2.1 (0.9–3.9)    | -33.4% (-55 to 1.1%)     |
| Diet low in vegetables                     | Subarachnoid haemorrhage                | 4.2% (1.9–8%)        | 4.6 (2–9.1)         | -38.5% (-62 to 7.3%)     | 4.7% (2.2–8.8%)    | 0.1 (0.1–0.3)    | -42.1% (-67.3 to 5.2%)   |
|                                            | Stroke                                  | 2.9% (0.8–5.3%)      | 59.1 (15.6–110.4)   | 28.5% (-31.6 to 222.5%)  | 2.5% (0.8–4.5%)    | 2.5 (0.7–4.6)    | 20.3% (-29.3 to 135.7%)  |
|                                            | Ischaemic stroke                        | 2.3% (0.3–4.4%)      | 25 (2.8–47.2)       | 30.3% (-30.8 to 194.2%)  | 2% (0.3–3.6%)      | 1.1 (0.1–2.2)    | 20.2% (-30.7 to 128.7%)  |
|                                            | Intracerebral haemorrhage               | 3.8% (0.3–8.3%)      | 31.4 (2.1–72.1)     | 27.2% (-44.9 to 388.1%)  | 3.4% (0.3–7.5%)    | 1.3 (0.1–2.9)    | 21.5% (-41.9 to 268.4%)  |
| Diet low in whole grains                   | Subarachnoid haemorrhage                | 2.4% (0.2–5.4%)      | 2.6 (0.2–5.9)       | 27.5% (-48.9 to 431.5%)  | 2.9% (0.2–6.4%)    | 0.1 (0–0.2)      | 5.3% (-54.2 to 264.3%)   |
|                                            | Stroke                                  | 4.7% (2.5–6.2%)      | 95.1 (49.6–134.5)   | -17.7% (-39.7 to 9.8%)   | 4.6% (2.7–5.9%)    | 4.6 (2.5–6.4)    | -14.1% (-38.1 to 18.1%)  |
|                                            | Ischaemic stroke                        | 8.9% (4.7–11.5%)     | 95.1 (49.6–134.5)   | -17.7% (-39.7 to 9.8%)   | 7.8% (4.5–10%)     | 4.6 (2.5–6.4)    | -14.1% (-38.1 to 18.1%)  |
| Dietary risks                              | Stroke                                  | 19.3% (14.5–24.7%)   | 388.9 (271.7–538.6) | -29.5% (-47.9 to -3.2%)  | 17% (12.7–21.9%)   | 16.8 (11.7–23.7) | -24.5% (-44.8 to 4.3%)   |
|                                            | Ischaemic stroke                        | 20.5% (14.7–25.9%)   | 219.6 (146.9–303)   | -17.7% (-39 to 10.9%)    | 17.6% (12.8–22.2%) | 10.3 (6.8–14.3)  | -14.6% (-39.4 to 18.8%)  |
|                                            | Intracerebral haemorrhage               | 18.6% (11.8–25.9%)   | 156.2 (93.6–241.5)  | -40.6% (-58.8 to -13%)   | 16.3% (10.3–22.9%) | 6.2 (3.7–9.4)    | -35.4% (-54.8 to -7.3%)  |
|                                            | Subarachnoid haemorrhage                | 12% (7.3–17.4%)      | 13.1 (7.6–20.3)     | -40.7% (-62.8 to -0.9%)  | 13.9% (8.6–20%)    | 0.4 (0.2–0.6)    | -44.3% (-67.3 to 0.8%)   |

**Table S16** Regional and national disabilities and deaths related to neurological conditions attributable to risk factors in North Africa and Middle East countries

| Location<br>Risk factor (alphabetic order) |                                         | DALYs (95% UI)     |                       |                           | Deaths (95% UI)    |                  |                          |
|--------------------------------------------|-----------------------------------------|--------------------|-----------------------|---------------------------|--------------------|------------------|--------------------------|
|                                            |                                         | PAF (%)            | Rate per 100,000      | Rate change (%)           | PAF (%)            | Rate per 100,000 | Rate change (%)          |
| Cause                                      |                                         | 2019               | 2019                  | From 1990 to 2019         | 2019               | 2019             | From 1990 to 2019        |
| Environmental/occupational risk factors§   | Meningitis                              | 0.4% (0.1–0.7%)    | 0.4 (0.1–0.7)         | -86.9% (-96.5 to -57.2%)  | 0.2% (0.1–0.5%)    | <0.1 (<0.1–<0.1) | -86.9% (-96.5 to -57.2%) |
|                                            | Encephalitis                            | 0.2% (0.1–0.4%)    | 0.1 (0–0.1)           | -57.7% (-88.5 to 38.5%)   | 0.1% (0.1–0.3%)    | <0.1 (<0.1–<0.1) | -57.7% (-88.5 to 38.5%)  |
|                                            | Stroke                                  | 32.1% (27.4–36.6%) | 648.8 (480.9–855.1)   | -41.6% (-57.1 to -19.5%)  | 30.2% (25.6–34.8%) | 30 (22–40)       | -35.4% (-52.7 to -10.8%) |
|                                            | Ischaemic stroke                        | 31.1% (26.4–35.6%) | 333 (251.2–436.2)     | -28.1% (-47.4 to -2.4%)   | 29.1% (24.5–33.6%) | 17 (12.3–22.7)   | -23.8% (-45.4 to 4%)     |
|                                            | Intracerebral haemorrhage               | 34.5% (29.5–39.3%) | 289.5 (209.7–388.9)   | -50.6% (-64.3 to -29.6%)  | 32.2% (27.2–37%)   | 12.2 (8.9–16.4)  | -45.4% (-60.6 to -22.9%) |
|                                            | Subarachnoid haemorrhage                | 24% (19.6–28.8%)   | 26.2 (18.6–35.8)      | -57.6% (-71.8 to -33.6%)  | 28.2% (23.5–33%)   | 0.8 (0.6–1.1)    | -55.7% (-73 to -25%)     |
| High body-mass index                       | Stroke                                  | 33.7% (23.5–43.4%) | 680.5 (426–986.2)     | -27.1% (-46.5 to 5.9%)    | 22.3% (14.1–30.7%) | 22.1 (12.8–33.7) | -23.9% (-45.7 to 12.4%)  |
|                                            | Ischaemic stroke                        | 26.1% (17.3–35.6%) | 279.5 (168.8–414.1)   | -6.1% (-30.8 to 31.5%)    | 16.7% (9.9–24.5%)  | 9.7 (5.2–15.8)   | -4.5% (-33.9 to 41.2%)   |
|                                            | Intracerebral haemorrhage               | 43.8% (31.3–55.5%) | 367.5 (229.9–532.6)   | -37.1% (-55.5 to -5.6%)   | 30.4% (19.7–41.5%) | 11.5 (6.6–17.5)  | -33.9% (-54 to -0.6%)    |
|                                            | Subarachnoid haemorrhage                | 30.6% (21.5–39.4%) | 33.5 (21.5–47.5)      | -35.8% (-57.8 to 6.1%)    | 28.8% (19.3–38.3%) | 0.8 (0.5–1.3)    | -40.3% (-62.8 to 3.8%)   |
|                                            | Neurological disorders*                 | 5.3% (1.5–12%)     | 68.6 (17.6–180.4)     | 40.9% (9.3 to 102.4%)     | 12.1% (3.9–22.9%)  | 4.3 (0.7–13.7)   | 41.6% (0.4 to 134.7%)    |
|                                            | Alzheimer's disease and other dementias | 17.5% (7.4–31.1%)  | 68.6 (17.6–180.4)     | 40.9% (9.3 to 102.4%)     | 16.5% (6.8–29.9%)  | 4.3 (0.7–13.7)   | 41.6% (0.4 to 134.7%)    |
| High fasting plasma glucose                | Stroke                                  | 29.2% (19.1–44.6%) | 589.9 (365.6–968.3)   | 16.6% (-19.6 to 70.1%)    | 31.4% (19.1–53.4%) | 31.1 (17.6–55.6) | 18.6% (-19.7 to 75.8%)   |
|                                            | Ischaemic stroke                        | 32.5% (16.5–58.8%) | 347.9 (171.6–688.6)   | 34.5% (-7.6 to 93.9%)     | 32.8% (14.8–70.7%) | 19.1 (8.4–42.7)  | 32.7% (-11.9 to 98.5%)   |
|                                            | Intracerebral haemorrhage               | 26.9% (17.1–39.2%) | 226.8 (130.9–362.2)   | -1.1% (-34.3 to 50%)      | 29.8% (17.3–49%)   | 11.3 (6.1–19.2)  | 2.7% (-31 to 54.9%)      |
|                                            | Subarachnoid haemorrhage                | 13.8% (8.3–20.6%)  | 15.1 (8.7–24.5)       | -14.3% (-48.5 to 55.2%)   | 22.8% (13.5–35.1%) | 0.7 (0.3–1.2)    | -17.3% (-52.1 to 58.1%)  |
|                                            | Neurological disorders*                 | 4% (0.7–11.3%)     | 52.3 (9.2–176.1)      | 55.7% (29.4 to 104.9%)    | 9.8% (2.1–21.9%)   | 3.5 (0.4–13.3)   | 56.5% (21.9 to 127%)     |
|                                            | Alzheimer's disease and other dementias | 13.3% (3.3–27.9%)  | 52.3 (9.2–176.1)      | 55.7% (29.4 to 104.9%)    | 13.4% (3.2–28%)    | 3.5 (0.4–13.3)   | 56.5% (21.9 to 127%)     |
| High LDL cholesterol                       | Stroke                                  | 12.9% (7.6–21.3%)  | 259.5 (141.1–442)     | -22.2% (-43 to 2.5%)      | 12% (4.5–25.3%)    | 11.9 (4.3–24.9)  | -18.5% (-42.6 to 9.4%)   |
|                                            | Ischaemic stroke                        | 24.2% (14.4–39.7%) | 259.5 (141.1–442)     | -22.2% (-43 to 2.5%)      | 20.4% (7.7–41.8%)  | 11.9 (4.3–24.9)  | -18.5% (-42.6 to 9.4%)   |
| High systolic blood pressure               | Stroke                                  | 50.6% (42.6–58%)   | 1021.4 (756.7–1342.5) | -34.7% (-52.5 to -9.3%)   | 48.5% (39.5–57.8%) | 48 (34.8–64.6)   | -30.8% (-51.2 to -2.1%)  |
|                                            | Ischaemic stroke                        | 48.9% (38.1–58.5%) | 523.1 (371.5–699.9)   | -21.1% (-44 to 8.3%)      | 45.3% (33.7–58.3%) | 26.4 (17.5–37.2) | -19.1% (-44.3 to 14.8%)  |
|                                            | Intracerebral haemorrhage               | 55.1% (45.2–64.7%) | 462.4 (335.3–627.5)   | -44.5% (-61.2 to -20.7%)  | 53.7% (41.7–65.9%) | 20.3 (14.2–27.7) | -40.6% (-58.3 to -15.2%) |
|                                            | Subarachnoid haemorrhage                | 32.8% (25.7–40.8%) | 35.8 (25.2–49.5)      | -47% (-67 to -11%)        | 43.6% (34.5–53.6%) | 1.2 (0.8–1.8)    | -50.1% (-70.2 to -11.6%) |
|                                            | Neurological disorders*                 | 0.7% (-0.3–1.9%)   | 13.5 (-6.3–39.9)      | -3.4% (-303.6 to 263.9%)  | 0.8% (-0.3–2.3%)   | 0.7 (-0.4–2.2)   | 14.1% (-346 to 359.4%)   |
| High temperature                           | Stroke                                  | 0.7% (-0.3–1.9%)   | 13.5 (-6.3–39.9)      | -3.4% (-303.6 to 263.9%)  | 0.8% (-0.3–2.3%)   | 0.7 (-0.4–2.2)   | 14.1% (-346 to 359.4%)   |
|                                            | Ischaemic stroke                        | 0.6% (-0.3–1.8%)   | 6.7 (-3.2–19.7)       | 21.2% (-359.2 to 367.4%)  | 0.8% (-0.3–2.3%)   | 0.4 (-0.2–1.3)   | 33.7% (-388.4 to 429.8%) |
|                                            | Intracerebral haemorrhage               | 0.7% (-0.3–2.1%)   | 6 (-2.8–17.8)         | -14.6% (-280.2 to 223.3%) | 0.8% (-0.3–2.3%)   | 0.3 (-0.1–0.8)   | -2.8% (-306.4 to 286.1%) |
|                                            | Subarachnoid haemorrhage                | 0.7% (-0.3–2%)     | 0.8 (-0.3–2.3)        | -45.3% (-234.8 to 120.8%) | 0.8% (-0.3–2.3%)   | <0.1 (<0.1–0.1)  | -32% (-268.7 to 175.6%)  |
| Household air pollution from solid fuels   | Meningitis                              | 0% (0–0%)          | <0.1 (<0.1–<0.1)      | -99.8% (-100 to -99.3%)   | 0% (0–0%)          | <0.1 (<0.1–<0.1) | -99.8% (-100 to -99.3%)  |
|                                            | Encephalitis                            | 0% (0–0%)          | <0.1 (<0.1–<0.1)      | -99.5% (-99.9 to -97.8%)  | 0% (0–0%)          | <0.1 (<0.1–<0.1) | -99.5% (-99.9 to -97.8%) |
|                                            | Stroke                                  | 0% (0–0.1%)        | 0.8 (0.3–1.9)         | -99.3% (-99.8 to -98.3%)  | 0% (0–0.1%)        | <0.1 (<0.1–0.1)  | -99.3% (-99.7 to -98.2%) |

**Table S16** Regional and national disabilities and deaths related to neurological conditions attributable to risk factors in North Africa and Middle East countries

| Location<br>Risk factor (alphabetic order) |                                         | DALYs (95% UI)     |                        |                          | Deaths (95% UI)        |                  |                          |
|--------------------------------------------|-----------------------------------------|--------------------|------------------------|--------------------------|------------------------|------------------|--------------------------|
|                                            |                                         | PAF (%)            | Rate per 100,000       | Rate change (%)          | PAF (%)                | Rate per 100,000 | Rate change (%)          |
| Cause                                      |                                         | 2019               | 2019                   | From 1990 to 2019        | 2019                   | 2019             | From 1990 to 2019        |
| Kidney dysfunction                         | Ischaemic stroke                        | 0% (0-0.1%)        | 0.4 (0.2-1)            | -99.2% (-99.7 to -97.9%) | 0% (0-0.1%)            | <0.1 (<0.1-<0.1) | -99.2% (-99.7 to -97.8%) |
|                                            | Intracerebral haemorrhage               | 0% (0-0.1%)        | 0.4 (0.1-0.8)          | -99.4% (-99.8 to -98.5%) | 0% (0-0.1%)            | <0.1 (<0.1-<0.1) | -99.4% (-99.8 to -98.4%) |
|                                            | Subarachnoid haemorrhage                | 0% (0-0.1%)        | <0.1 (<0.1-0.1)        | -99.4% (-99.8 to -98.4%) | 0% (0-0.1%)            | <0.1 (<0.1-<0.1) | -99.5% (-99.8 to -98.4%) |
|                                            | Stroke                                  | 10.5% (8.2-12.5%)  | 212.3 (151.8-282.2)    | -13.3% (-37.4 to 19.3%)  | 10.4% (7.2-13.6%)      | 10.4 (6.6-14.6)  | -7.7% (-35.2 to 29.6%)   |
|                                            | Ischaemic stroke                        | 12.1% (8.6-15.3%)  | 129.8 (85.2-179.5)     | 0.4% (-27.8 to 36.6%)    | 10.4% (5.3-14.7%)      | 6.1 (3-9.2)      | 2.2% (-31.2 to 46.4%)    |
| Lead exposure                              | Intracerebral haemorrhage               | 9.8% (7.9-12%)     | 82.5 (55.5-112.2)      | -28.7% (-50.5 to 1%)     | 11.3% (8.2-14.6%)      | 4.3 (2.8-6.1)    | -18.9% (-42.7 to 15.9%)  |
|                                            | Stroke                                  | 5.1% (3.7-2%)      | 102.2 (57.3-157)       | -47.2% (-62.5 to -27.4%) | 5.4% (3.4-7.7%)        | 5.4 (3.1-8.3)    | -34.6% (-53.1 to -10.1%) |
|                                            | Ischaemic stroke                        | 5% (3-7.3%)        | 54 (30.2-83.3)         | -30.8% (-51.6 to -7.3%)  | 5.1% (3-7.7%)          | 3 (1.6-4.8)      | -19.1% (-45.4 to 11.5%)  |
| Low birth weight                           | Intracerebral haemorrhage               | 5.4% (3-8.1%)      | 45 (23.4-72.6)         | -57.9% (-71.1 to -39.8%) | 6% (3.4-9%)            | 2.3 (1.2-3.6)    | -46.5% (-62.2 to -23.9%) |
|                                            | Subarachnoid haemorrhage                | 2.9% (1.4-4.6%)    | 3.1 (1.5-5.6)          | -62.9% (-79.2 to -37.6%) | 4.6% (2.6-7%)          | 0.1 (0.1-0.2)    | -56.6% (-75.3 to -23.8%) |
|                                            | Meningitis                              | 2.3% (1.3-3.9%)    | 2.3 (1.2-4)            | -86.6% (-93.8 to -69.7%) | 1.5% (0.8-2.6%)        | <0.1 (<0.1-<0.1) | -86.6% (-93.8 to -69.7%) |
| Low birth weight and short gestation       | Encephalitis                            | 1.3% (0.8-2%)      | 0.4 (0.2-0.6)          | -56.1% (-80 to -9.4%)    | 0.9% (0.5-1.3%)        | <0.1 (<0.1-<0.1) | -56.1% (-80 to -9.4%)    |
|                                            | Meningitis                              | 2.6% (1.4-4.3%)    | 2.6 (1.4-4.4)          | -86.2% (-93.6 to -68.9%) | 1.7% (0.9-2.8%)        | <0.1 (<0.1-<0.1) | -86.2% (-93.6 to -68.9%) |
| Low physical activity                      | Encephalitis                            | 1.5% (0.9-2.2%)    | 0.4 (0.2-0.7)          | -55% (-79.3 to -7.4%)    | 0.9% (0.6-1.4%)        | <0.1 (<0.1-<0.1) | -55% (-79.4 to -7.4%)    |
|                                            | Stroke                                  | 4.3% (0.9-9.4%)    | 86.1 (17.5-195.8)      | -17.1% (-39 to 11.1%)    | 5.7% (1.3-11.4%)       | 5.6 (1.3-11.4)   | -14.7% (-38.6 to 16.2%)  |
| Low temperature                            | Ischaemic stroke                        | 8.1% (1.8-17.7%)   | 86.1 (17.5-195.8)      | -17.1% (-39 to 11.1%)    | 9.6% (2.3-19.5%)       | 5.6 (1.3-11.4)   | -14.7% (-38.6 to 16.2%)  |
|                                            | Stroke                                  | 6.1% (2.7-9.9%)    | 123.7 (50.9-208.1)     | -43.4% (-59 to -20.6%)   | 6.9% (3.1-11.3%)       | 6.9 (2.9-11.4)   | -33.3% (-50.3 to -8.7%)  |
|                                            | Ischaemic stroke                        | 5.7% (2.5-9.3%)    | 61.5 (25.7-103.6)      | -28.8% (-49.2 to 0.2%)   | 6.9% (3.1-11.3%)       | 4 (1.7-6.8)      | -21.8% (-43.2 to 8%)     |
|                                            | Intracerebral haemorrhage               | 6.6% (2.9-10.7%)   | 55.2 (22.9-94)         | -50% (-64.7 to -29.1%)   | 6.9% (3.1-11.3%)       | 2.6 (1.1-4.4)    | -43.2% (-59.3 to -20.4%) |
|                                            | Subarachnoid haemorrhage                | 6.3% (2.8-10.3%)   | 6.9 (2.9-11.8)         | -68% (-78.2 to -50%)     | 6.9% (3.1-11.3%)       | 0.2 (0.1-0.3)    | -60.1% (-74.2 to -35.8%) |
| Metabolic risk factors†                    | Stroke                                  | 72.5% (66-78.9%)   | 1464.8 (1126.9-1894.9) | -29.9% (-47.9 to -2.6%)  | 70.8% (61.5-80.2%)     | 70.1 (52.4-91.9) | -25.1% (-46.1 to 5.2%)   |
|                                            | Ischaemic stroke                        | 74.7% (65.6-85.7%) | 800 (613.8-1033.8)     | -16.9% (-38.9 to 11.9%)  | 70.7% (58.1-85.8%)     | 41.2 (29.9-55.2) | -13.7% (-39.1 to 19.9%)  |
|                                            | Intracerebral haemorrhage               | 73.6% (65.7-80.3%) | 617.7 (460.7-819)      | -40.9% (-58.1 to -16.2%) | 72% (62.5-81.1%)       | 27.3 (20.1-36.1) | -36.2% (-54.5 to -8.8%)  |
|                                            | Subarachnoid haemorrhage                | 43.1% (35.5-51%)   | 47.2 (34.1-63.6)       | -43.4% (-64.3 to -5.6%)  | 56.2% (47.5-65.3%)     | 1.6 (1.1-2.2)    | -46.6% (-68.1 to -7%)    |
|                                            | Neurological disorders*                 | 8.6% (2.8-18.3%)   | 111.7 (32.3-291.9)     | 43.3% (15.2 to 92%)      | 20.3% (8.3-35.7%)      | 7.2 (1.2-22.1)   | 44.3% (8.9 to 112.2%)    |
|                                            | Alzheimer's disease and other dementias | 28.5% (13.7-46.2%) | 111.7 (32.3-291.9)     | 43.3% (15.2 to 92%)      | 27.6% (12.6-45.4%)     | 7.2 (1.2-22.1)   | 44.3% (8.9 to 112.2%)    |
|                                            | Non-optimal temperature                 | Stroke             | 6.7% (3.9-10%)         | 136.4 (73.1-215)         | -41.1% (-58.5 to -16%) | 7.6% (4.5-11.4%) | 7.6 (4.2-11.8)           |
| Other environmental risks                  | Ischaemic stroke                        | 6.3% (3.7-9.4%)    | 67.8 (36.9-106.8)      | -26% (-49.6 to 6.2%)     | 7.6% (4.5-11.4%)       | 4.5 (2.5-7)      | -18.7% (-42.5 to 14.9%)  |
|                                            | Intracerebral haemorrhage               | 7.3% (4.3-10.7%)   | 60.9 (31.9-96.5)       | -48% (-63.9 to -25.5%)   | 7.6% (4.5-11.4%)       | 2.9 (1.6-4.6)    | -41% (-58.4 to -16.7%)   |
|                                            | Subarachnoid haemorrhage                | 7% (4.1-10.3%)     | 7.6 (4.2-12.1)         | -66.8% (-77.2 to -47%)   | 7.6% (4.5-11.4%)       | 0.2 (0.1-0.3)    | -58.5% (-73.3 to -31.3%) |
|                                            | Stroke                                  | 5.1% (3.7-2%)      | 102.2 (57.3-157)       | -47.2% (-62.5 to -27.4%) | 5.4% (3.4-7.7%)        | 5.4 (3.1-8.3)    | -34.6% (-53.1 to -10.1%) |
|                                            | Ischaemic stroke                        | 5% (3-7.3%)        | 54 (30.2-83.3)         | -30.8% (-51.6 to -7.3%)  | 5.1% (3-7.7%)          | 3 (1.6-4.8)      | -19.1% (-45.4 to 11.5%)  |



**Table S16** Regional and national disabilities and deaths related to neurological conditions attributable to risk factors in North Africa and Middle East countries

| Location                     | Risk factor (alphabetic order) | Cause                                   | DALYs (95% UI)       |                        |                          | Deaths (95% UI)    |                         |                          |
|------------------------------|--------------------------------|-----------------------------------------|----------------------|------------------------|--------------------------|--------------------|-------------------------|--------------------------|
|                              |                                |                                         | PAF (%)              | Rate per 100,000       | Rate change (%)          | PAF (%)            | Rate per 100,000        | Rate change (%)          |
|                              |                                |                                         | 2019                 | 2019                   | From 1990 to 2019        | 2019               | 2019                    | From 1990 to 2019        |
| Particulate matter pollution |                                | Intracerebral haemorrhage               | 5.4% (3–8.1%)        | 45 (23.4–72.6)         | -57.9% (-71.1 to -39.8%) | 6% (3.4–9%)        | 2.3 (1.2–3.6)           | -46.5% (-62.2 to -23.9%) |
|                              |                                | Subarachnoid haemorrhage                | 2.9% (1.4–4.6%)      | 3.1 (1.5–5.6)          | -62.9% (-79.2 to -37.6%) | 4.6% (2.6–7%)      | 0.1 (0.1–0.2)           | -56.6% (-75.3 to -23.8%) |
|                              |                                | Meningitis                              | 0.4% (0.1–0.7%)      | 0.4 (0.1–0.7)          | -86.9% (-96.5 to -57.2%) | 0.2% (0.1–0.5%)    | <0.1 (<0.1–<0.1)        | -86.9% (-96.5 to -57.2%) |
|                              |                                | Encephalitis                            | 0.2% (0.1–0.4%)      | 0.1 (0–0.1)            | -57.7% (-88.5 to 38.5%)  | 0.1% (0.1–0.3%)    | <0.1 (<0.1–<0.1)        | -57.7% (-88.5 to 38.5%)  |
|                              |                                | Stroke                                  | 23.3% (19.3–27.5%)   | 471.7 (341.1–628.8)    | -41.4% (-57.1 to -18.4%) | 20.1% (16.3–24%)   | 20 (14.1–26.9)          | -37.9% (-55 to -12%)     |
|                              |                                | Ischaemic stroke                        | 22.5% (18.4–26.6%)   | 241.2 (177.7–320.5)    | -28.9% (-47.7 to -3.3%)  | 19.1% (15.5–23%)   | 11.1 (7.8–15)           | -27% (-48.1 to 1.7%)     |
| Secondhand smoke             |                                | Intracerebral haemorrhage               | 25.3% (20.9–29.8%)   | 213 (149.9–290.3)      | -50.6% (-64.6 to -28.5%) | 21.9% (17.9–26%)   | 8.3 (5.8–11.4)          | -47.2% (-62.2 to -24.7%) |
|                              |                                | Subarachnoid haemorrhage                | 16.1% (12.6–20.1%)   | 17.6 (12.4–24.3)       | -51% (-68.6 to -18.4%)   | 18.7% (15.1–22.5%) | 0.5 (0.4–0.8)           | -54.5% (-72.9 to -19.2%) |
|                              |                                | Stroke                                  | 3.8% (2.9–4.7%)      | 76.3 (52.2–107)        | -43.3% (-59.6 to -21.5%) | 3.1% (2.4–3.9%)    | 3.1 (2.1–4.3)           | -40.2% (-57.3 to -15.3%) |
|                              |                                | Ischaemic stroke                        | 3.4% (2.5–4.2%)      | 36.2 (25.2–50.3)       | -31% (-50.6 to -5.4%)    | 2.8% (2.1–3.6%)    | 1.6 (1.1–2.3)           | -29.4% (-49.7 to -0.9%)  |
| Short gestation              |                                | Intracerebral haemorrhage               | 4.4% (3.3–5.6%)      | 37 (24.9–53.3)         | -51.1% (-65.9 to -28.1%) | 3.5% (2.7–4.4%)    | 1.3 (0.9–1.9)           | -48.6% (-63.9 to -25.3%) |
|                              |                                | Subarachnoid haemorrhage                | 2.9% (2.1–3.8%)      | 3.2 (2.1–4.5)          | -51.6% (-69 to -19.1%)   | 3.2% (2.4–4.1%)    | 0.1 (0.1–0.1)           | -54.8% (-72.8 to -21.2%) |
|                              |                                | Meningitis                              | 1.8% (1–3%)          | 1.8 (1–3.2)            | -84.8% (-92.9 to -65.8%) | 1.2% (0.7–2%)      | <0.1 (<0.1–<0.1)        | -84.8% (-92.9 to -65.8%) |
| Smoking                      |                                | Encephalitis                            | 1% (0.6–1.5%)        | 0.3 (0.2–0.5)          | -50.2% (-77.1 to 3.5%)   | 0.7% (0.4–1%)      | <0.1 (<0.1–<0.1)        | -50.2% (-77.1 to 3.5%)   |
|                              |                                | Stroke                                  | 15.8% (14.2–17.3%)   | 319 (236.7–425.8)      | -50.6% (-65.2 to -28.3%) | 12% (10.7–13.4%)   | 11.9 (8.8–16.2)         | -49% (-65.1 to -24.1%)   |
| Tobacco                      |                                | Ischaemic stroke                        | 14.4% (12.9–16%)     | 154.7 (116.8–200.6)    | -41% (-59.4 to -16.1%)   | 10.5% (9.2–11.8%)  | 6.1 (4.5–8.3)           | -40.2% (-60.7 to -10.3%) |
|                              |                                | Intracerebral haemorrhage               | 18.2% (16.3–20.1%)   | 152.7 (110.5–208.1)    | -57.1% (-70.5 to -35.7%) | 14.4% (12.8–16.1%) | 5.5 (4–7.5)             | -55.5% (-69.2 to -32.5%) |
|                              |                                | Subarachnoid haemorrhage                | 10.6% (8.4–13.6%)    | 11.6 (8.1–16.6)        | -57.5% (-75.9 to -24.7%) | 12.4% (10.1–15.1%) | 0.4 (0.2–0.5)           | -59.9% (-79 to -25.7%)   |
|                              |                                | Neurological disorders*                 | 5% (1.7–10.6%)       | 65.3 (20.6–160.8)      | -14.3% (-34.1 to 13.8%)  | 11.1% (3.4–18.3%)  | 4.1 (0.5–12.2)          | -10.1% (-38.6 to 36%)    |
|                              |                                | Alzheimer's disease and other dementias | 18.5% (11.7–25.1%)   | 72.1 (27.4–168.2)      | -15.6% (-34.6 to 10%)    | 17.7% (11–24.6%)   | 4.6 (1–12.8)            | -10.9% (-35.1 to 25.8%)  |
|                              |                                | Parkinson's disease                     | -10.1% (-15.7–-5.2%) | -8.5 (-14–3.9)         | -22.7% (-45.7 to 10%)    | -9% (-14.2–-4.5%)  | -0.5 (-0.8–0.2)         | -17.2% (-43.7 to 25.2%)  |
|                              |                                | Multiple sclerosis                      | 11.4% (8.4–14.4%)    | 1.7 (1.1–2.5)          | -7.3% (-31.4 to 18.8%)   | 13.2% (9.7–17.4%)  | <0.1 (<0.1–<0.1)        | -14.4% (-50.9 to 41.3%)  |
|                              |                                | Stroke                                  | 18.9% (17.2–20.7%)   | 382.2 (284.8–508.5)    | -49.1% (-63.6 to -26.9%) | 14.7% (13.2–16.2%) | 14.6 (10.8–19.5)        | -47.1% (-63 to -22.3%)   |
|                              |                                | Ischaemic stroke                        | 17.3% (15.6–19%)     | 185.1 (140.8–241.3)    | -39.1% (-57.3 to -14.2%) | 12.9% (11.5–14.5%) | 7.6 (5.6–10.1)          | -38% (-58.6 to -9.3%)    |
|                              |                                | Intracerebral haemorrhage               | 21.8% (19.8–23.8%)   | 182.9 (133.2–249.8)    | -55.8% (-69.1 to -34.5%) | 17.3% (15.5–19.1%) | 6.6 (4.8–8.9)           | -54.1% (-68.1 to -31.5%) |
|                              |                                | Subarachnoid haemorrhage                | 13% (10.5–16.3%)     | 14.2 (10.2–20)         | -56.2% (-74.2 to -23.8%) | 15.1% (12.6–18.1%) | 0.4 (0.3–0.6)           | -58.8% (-77.5 to -25.4%) |
|                              |                                | Neurological disorders*                 | 5% (1.7–10.6%)       | 65.3 (20.6–160.8)      | -14.3% (-34.1 to 13.8%)  | 11.1% (3.4–18.3%)  | 4.1 (0.5–12.2)          | -10.1% (-38.6 to 36%)    |
|                              |                                | Alzheimer's disease and other dementias | 18.5% (11.7–25.1%)   | 72.1 (27.4–168.2)      | -15.6% (-34.6 to 10%)    | 17.7% (11–24.6%)   | 4.6 (1–12.8)            | -10.9% (-35.1 to 25.8%)  |
|                              | Parkinson's disease            | -10.1% (-15.7–-5.2%)                    | -8.5 (-14–3.9)       | -22.7% (-45.7 to 10%)  | -9% (-14.2–-4.5%)        | -0.5 (-0.8–0.2)    | -17.2% (-43.7 to 25.2%) |                          |
|                              | Multiple sclerosis             | 11.4% (8.4–14.4%)                       | 1.7 (1.1–2.5)        | -7.3% (-31.4 to 18.8%) | 13.2% (9.7–17.4%)        | <0.1 (<0.1–<0.1)   | -14.4% (-50.9 to 41.3%) |                          |



**Table S16** Regional and national disabilities and deaths related to neurological conditions attributable to risk factors in North Africa and Middle East countries

| Location<br>Risk factor (alphabetic order) | Cause                                   | DALYs (95% UI)       |                     |                              | Deaths (95% UI)      |                  |                              |
|--------------------------------------------|-----------------------------------------|----------------------|---------------------|------------------------------|----------------------|------------------|------------------------------|
|                                            |                                         | PAF (%)              | Rate per 100,000    | Rate change (%)              | PAF (%)              | Rate per 100,000 | Rate change (%)              |
|                                            |                                         | 2019                 | 2019                | From 1990 to 2019            | 2019                 | 2019             | From 1990 to 2019            |
| <b>Tunisia</b>                             |                                         |                      |                     |                              |                      |                  |                              |
| Air pollution                              | Meningitis                              | 0.9% (0.3–1.9%)      | 0.4 (0.1–0.8)       | -77.4% (-94.5 to -17.8%)     | 0.5% (0.2–1.1%)      | <0.1 (<0.1–<0.1) | -77.4% (-94.5 to -17.8%)     |
|                                            | Encephalitis                            | 0.4% (0.1–1%)        | 0.1 (0–0.2)         | -24.2% (-81.6 to 188.9%)     | 0.3% (0.1–0.7%)      | <0.1 (<0.1–<0.1) | -24.2% (-81.6 to 188.9%)     |
|                                            | Stroke                                  | 22.9% (17.4–28.5%)   | 337.9 (232.8–472.5) | -27.7% (-46.3 to -3.9%)      | 19.3% (14.3–24.3%)   | 15.4 (10.1–22)   | -29.9% (-49.1 to -5.2%)      |
|                                            | Ischaemic stroke                        | 21.9% (16.6–27.5%)   | 238.8 (164.3–334.5) | 2.2% (-24.2 to 34.7%)        | 18.5% (13.7–23.5%)   | 11.7 (7.8–16.7)  | -5.8% (-34.5 to 25.6%)       |
|                                            | Intracerebral haemorrhage               | 25.4% (19.4–31.5%)   | 82.1 (54.5–115.5)   | -56.9% (-70.3 to -36.3%)     | 22% (16.7–27.6%)     | 3.2 (2.1–4.5)    | -60.5% (-73.1 to -41.4%)     |
|                                            | Subarachnoid haemorrhage                | 26.4% (20.5–32.5%)   | 17 (11.1–24.6)      | -60.5% (-76.2 to -32.2%)     | 23% (17.5–28.5%)     | 0.5 (0.3–0.8)    | -65.3% (-80 to -36.9%)       |
| Alcohol use                                | Stroke                                  | 1% (0.5–1.6%)        | 15 (6.7–24.8)       | 29.4% (-29.7 to 211.4%)      | 0.5% (0.1–0.9%)      | 0.4 (0.1–0.8)    | 39.4% (-225.4 to 801.6%)     |
|                                            | Ischaemic stroke                        | 0.3% (-0.3–0.8%)     | 2.9 (-2.7–8.8)      | -315.6% (-2938.7 to 3213.6%) | 0.1% (-0.3–0.5%)     | 0.1 (-0.2–0.3)   | -152.2% (-1289.1 to 2244.3%) |
| All risk factors                           | Intracerebral haemorrhage               | 3.8% (2.3–5.4%)      | 12.2 (6.9–19.3)     | -5.9% (-40.8 to 63.9%)       | 2.6% (1.5–3.8%)      | 0.4 (0.2–0.6)    | -10.5% (-45.8 to 71.2%)      |
|                                            | Neurological disorders*                 | 0.6% (0.2–1.3%)      | 7.6 (3.7–14)        | 37.5% (-33.7 to 202.8%)      | 0.2% (0.1–0.5%)      | 0.1 (0–0.1)      | 25.9% (-15.8 to 88.3%)       |
|                                            | Idiopathic epilepsy                     | 6.5% (4.3–9%)        | 7.6 (3.7–14)        | 37.5% (-33.7 to 202.8%)      | 6.9% (4.7–9.6%)      | 0.1 (0–0.1)      | 25.9% (-15.8 to 88.3%)       |
|                                            | Meningitis                              | 6.2% (3.7–9.8%)      | 2.3 (1.3–3.9)       | -78.7% (-89.9 to -55.9%)     | 3.5% (2.5–6%)        | <0.1 (<0.1–<0.1) | -78.7% (-89.9 to -55.9%)     |
|                                            | Encephalitis                            | 2.8% (1.3–5.3%)      | 0.5 (0.3–0.9)       | -27.1% (-73.1 to 80.6%)      | 1.8% (0.8–3.5%)      | <0.1 (<0.1–<0.1) | -27.1% (-73.1 to 80.6%)      |
|                                            | Stroke                                  | 85.5% (80.9–90.5%)   | 1263 (963–1624.7)   | -21% (-41.6 to 5.3%)         | 82.3% (75.6–90.3%)   | 65.8 (48.1–85.4) | -22.7% (-43.5 to 3%)         |
|                                            | Ischaemic stroke                        | 85.3% (79.6–92.1%)   | 931 (709.5–1185.6)  | 8.1% (-19.9 to 40.9%)        | 82% (73.9–92.1%)     | 51.8 (37.8–67.6) | 0.9% (-28.1 to 33.3%)        |
|                                            | Intracerebral haemorrhage               | 86.3% (82–90.1%)     | 278.4 (204.9–370.4) | -54.2% (-68.3 to -33.4%)     | 83.9% (77.8–89.5%)   | 12.1 (8.9–16.2)  | -57.8% (-70.7 to -38%)       |
|                                            | Subarachnoid haemorrhage                | 83.1% (78.3–87.1%)   | 53.7 (37.5–73.1)    | -58.3% (-74.7 to -29.1%)     | 81.7% (75.3–87.5%)   | 1.9 (1.3–2.7)    | -62.7% (-78.3 to -31.9%)     |
|                                            | Neurological disorders*                 | 13.1% (5.4–25.1%)    | 171.4 (64.5–400.5)  | 16.4% (-6.5 to 49.7%)        | 29.6% (13.9–45.4%)   | 10.4 (1.9–30.1)  | 18.3% (-9.6 to 74.5%)        |
| Ambient particulate matter pollution       | Alzheimer's disease and other dementias | 42.5% (28.3–57.8%)   | 170.1 (63.5–397.2)  | 13.8% (-8.3 to 44.9%)        | 40.8% (26.6–56.3%)   | 10.9 (2.3–30.4)  | 16.4% (-10.7 to 64.6%)       |
|                                            | Parkinson's disease                     | -12.1% (-18.6–-6.1%) | -8.8 (-14.4–-4.2)   | -12.8% (-38.8 to 22.4%)      | -11.3% (-17.2–-5.7%) | -0.5 (-0.8–0.2)  | -12.3% (-41.1 to 25.9%)      |
|                                            | Idiopathic epilepsy                     | 6.5% (4.3–9%)        | 7.6 (3.7–14)        | 37.5% (-33.7 to 202.8%)      | 6.9% (4.7–9.6%)      | 0.1 (0–0.1)      | 25.9% (-15.8 to 88.3%)       |
|                                            | Multiple sclerosis                      | 11.1% (8.1–14.1%)    | 2.5 (1.6–3.4)       | 11.5% (-15.6 to 43.6%)       | 12.8% (8.9–17.5%)    | <0.1 (<0.1–0.1)  | 9.5% (-35.8 to 75%)          |
|                                            | Meningitis                              | 0.9% (0.3–1.9%)      | 0.4 (0.1–0.8)       | -68.7% (-92.3 to 14%)        | 0.5% (0.2–1.1%)      | <0.1 (<0.1–<0.1) | -68.7% (-92.3 to 14%)        |
|                                            | Encephalitis                            | 0.4% (0.1–1%)        | 0.1 (0–0.2)         | 5% (-74.9 to 318.9%)         | 0.3% (0.1–0.7%)      | <0.1 (<0.1–<0.1) | 5% (-75 to 318.9%)           |
|                                            | Stroke                                  | 22.8% (17.3–28.5%)   | 336.9 (232.4–471.7) | -4.9% (-31.2 to 34.7%)       | 19.2% (14.3–24.3%)   | 15.4 (10.1–21.9) | -7.8% (-34 to 31.8%)         |
|                                            | Ischaemic stroke                        | 21.8% (16.5–27.4%)   | 238.1 (163.9–334)   | 34.4% (-1.8 to 87.8%)        | 18.4% (13.7–23.5%)   | 11.7 (7.7–16.6)  | 24% (-12.8 to 76.8%)         |
|                                            | Intracerebral haemorrhage               | 25.4% (19.4–31.3%)   | 81.8 (54.3–115.4)   | -43.4% (-61.9 to -14.4%)     | 21.9% (16.6–27.5%)   | 3.2 (2.1–4.5)    | -48.1% (-64.6 to -20.6%)     |
|                                            | Subarachnoid haemorrhage                | 26.4% (20.4–32.5%)   | 17 (11–24.6)        | -47.7% (-69.4 to -6.1%)      | 22.9% (17.4–28.4%)   | 0.5 (0.3–0.8)    | -54.3% (-74.8 to -9.5%)      |
| Behavioural risk factors‡                  | Meningitis                              | 5.9% (3.5–9.3%)      | 2.2 (1.2–3.7)       | -78.6% (-90 to -55.1%)       | 3.3% (1.9–5.4%)      | <0.1 (<0.1–<0.1) | -78.6% (-90 to -55.1%)       |
|                                            | Encephalitis                            | 2.7% (1.3–5%)        | 0.5 (0.2–0.8)       | -26.6% (-72.3 to 80.1%)      | 1.7% (0.8–3.3%)      | <0.1 (<0.1–<0.1) | -26.6% (-72.3 to 80.1%)      |

**Table S16** Regional and national disabilities and deaths related to neurological conditions attributable to risk factors in North Africa and Middle East countries

| Location<br>Risk factor (alphabetic order) | Cause                                   | DALYs (95% UI)      |                         |                          | Deaths (95% UI)     |                         |                          |
|--------------------------------------------|-----------------------------------------|---------------------|-------------------------|--------------------------|---------------------|-------------------------|--------------------------|
|                                            |                                         | PAF (%)             | Rate per 100,000        | Rate change (%)          | PAF (%)             | Rate per 100,000        | Rate change (%)          |
|                                            |                                         | 2019                | 2019                    | From 1990 to 2019        | 2019                | 2019                    | From 1990 to 2019        |
| Child and maternal malnutrition            | Stroke                                  | 32.7% (28.7–37.3%)  | 483.5 (362.3–650.5)     | -29.4% (-48 to -4.1%)    | 28.4% (24.2–33.4%)  | 22.8 (16.2–30.6)        | -31% (-49.9 to -5.8%)    |
|                                            | Ischaemic stroke                        | 32.5% (27.4–38%)    | 355 (260.5–480.3)       | -2.2% (-29 to 29.7%)     | 28.5% (23.2–34.5%)  | 18 (12.6–25.1)          | -8.8% (-36.5 to 21.5%)   |
|                                            | Intracerebral haemorrhage               | 33.6% (28.9–38.9%)  | 108.5 (76.4–149)        | -59.3% (-72.4 to -39.3%) | 28.5% (24.2–33.4%)  | 4.1 (2.9–5.6)           | -63.2% (-75.4 to -45%)   |
|                                            | Subarachnoid haemorrhage                | 30.9% (25.1–36.8%)  | 20 (13.1–28.8)          | -64.2% (-78.9 to -37.9%) | 27.3% (21.7–33%)    | 0.6 (0.4–0.9)           | -68.6% (-82.6 to -42.5%) |
|                                            | Neurological disorders*                 | 5.3% (2.2–10.3%)    | 70.1 (26.3–160.2)       | -13.5% (-30.9 to 14.6%)  | 10.2% (3.4–16.4%)   | 3.7 (0.5–11.2)          | -15.6% (-38 to 29.8%)    |
|                                            | Alzheimer's disease and other dementias | 17.1% (11.6–22.7%)  | 68.8 (27.1–161.7)       | -17.5% (-34.3 to 6.7%)   | 15.4% (10.1–20.7%)  | 4.1 (0.9–11.7)          | -15.7% (-37 to 19.1%)    |
|                                            | Parkinson's disease                     | -12.1% (-18.6–6.1%) | -8.8 (-14.4–4.2)        | -12.8% (-38.8 to 22.4%)  | -11.3% (-17.2–5.7%) | -0.5 (-0.8–0.2)         | -12.3% (-41.1 to 25.9%)  |
|                                            | Idiopathic epilepsy                     | 6.5% (4.3–9%)       | 7.6 (3.7–14)            | 37.5% (-33.7 to 202.8%)  | 6.9% (4.7–9.6%)     | 0.1 (0–0.1)             | 25.9% (-15.8 to 88.3%)   |
|                                            | Multiple sclerosis                      | 11.1% (8.1–14.1%)   | 2.5 (1.6–3.4)           | 11.5% (-15.6 to 43.6%)   | 12.8% (8.9–17.5%)   | <0.1 (<0.1–0.1)         | 9.5% (-35.8 to 75%)      |
|                                            | Meningitis                              | 5.9% (3.5–9.3%)     | 2.2 (1.2–3.7)           | -78.6% (-90 to -55.1%)   | 3.3% (1.9–5.4%)     | <0.1 (<0.1–<0.1)        | -78.6% (-90 to -55.1%)   |
| Encephalitis                               | 2.7% (1.3–5%)                           | 0.5 (0.2–0.8)       | -26.6% (-72.3 to 80.1%) | 1.7% (0.8–3.3%)          | <0.1 (<0.1–<0.1)    | -26.6% (-72.3 to 80.1%) |                          |
| Diet high in red meat                      | Stroke                                  | 3.3% (1.1–5.1%)     | 49 (16.6–83.4)          | -28.7% (-56.4 to 10%)    | 2.5% (0.8–3.9%)     | 2 (0.6–3.6)             | -30.6% (-58.6 to 4.5%)   |
|                                            | Ischaemic stroke                        | 3% (0.4–4.7%)       | 32.4 (4.8–57.9)         | 7.5% (-21.3 to 40.8%)    | 2.3% (0.4–3.6%)     | 1.4 (0.2–2.7)           | 0% (-31.4 to 33.4%)      |
|                                            | Intracerebral haemorrhage               | 4.2% (0.5–6.9%)     | 13.7 (1.7–26.1)         | -56.3% (-70.3 to -34.4%) | 3.5% (0.4–5.8%)     | 0.5 (0.1–1)             | -59.4% (-72.1 to -40%)   |
|                                            | Subarachnoid haemorrhage                | 4.6% (0.6–7.4%)     | 3 (0.4–5.5)             | -59.9% (-76.2 to -31.2%) | 3.7% (0.5–6.1%)     | 0.1 (0–0.2)             | -64.7% (-80.2 to -35.8%) |
| Diet high in sodium                        | Stroke                                  | 1.8% (0.3–7.2%)     | 27 (3.6–109.9)          | -24.7% (-53.9 to 40.3%)  | 1.5% (0.3–5.9%)     | 1.2 (0.2–4.9)           | -27% (-57 to 37.2%)      |
|                                            | Ischaemic stroke                        | 1.7% (0.3–6.6%)     | 18.5 (2.6–74.9)         | 8% (-39.4 to 93.3%)      | 1.4% (0.3–5.4%)     | 0.9 (0.2–3.6)           | 0.9% (-43.7 to 81.2%)    |
|                                            | Intracerebral haemorrhage               | 2.2% (0.3–8.7%)     | 7.1 (0.8–28.8)          | -53.9% (-74.9 to -10%)   | 1.9% (0.3–7.8%)     | 0.3 (0–1.1)             | -57.8% (-76.1 to -17.8%) |
|                                            | Subarachnoid haemorrhage                | 2.1% (0.2–8.2%)     | 1.4 (0.1–5.6)           | -57.4% (-79 to 0.3%)     | 1.9% (0.3–7.8%)     | <0.1 (<0.1–0.2)         | -62.2% (-81.3 to -7.5%)  |
| Diet low in fibre                          | Stroke                                  | 0.8% (0.3–1.7%)     | 11.4 (3.6–25.3)         | -51.7% (-65.7 to -26.7%) | 0.7% (0.3–1.6%)     | 0.6 (0.2–1.3)           | -52.5% (-68.6 to -23.6%) |
|                                            | Ischaemic stroke                        | 0.7% (0.3–1.6%)     | 8.1 (2.6–17.9)          | -31.6% (-52.8 to 0.5%)   | 0.7% (0.3–1.5%)     | 0.5 (0.2–1)             | -36.2% (-60 to 1%)       |
|                                            | Intracerebral haemorrhage               | 0.8% (0.3–1.9%)     | 2.7 (0.8–6.2)           | -71.6% (-80.6 to -54.6%) | 0.8% (0.3–1.7%)     | 0.1 (0–0.3)             | -74.2% (-82.5 to -57.3%) |
|                                            | Subarachnoid haemorrhage                | 0.9% (0.3–2.1%)     | 0.6 (0.2–1.4)           | -73.7% (-84.4 to -50.8%) | 0.8% (0.3–1.8%)     | <0.1 (<0.1–<0.1)        | -76.8% (-87 to -52.3%)   |
| Diet low in fruits                         | Stroke                                  | 3.5% (1.5–5.8%)     | 51.6 (20.9–89.7)        | -48.5% (-67.7 to -23%)   | 2.7% (1.1–4.6%)     | 2.2 (0.9–4)             | -51.7% (-70.4 to -26.4%) |
|                                            | Ischaemic stroke                        | 2.8% (0.6–5.3%)     | 30.3 (5.9–62.8)         | -21% (-45.2 to 16.5%)    | 2.2% (0.5–4.3%)     | 1.4 (0.3–2.9)           | -28.7% (-53.7 to 8.5%)   |
|                                            | Intracerebral haemorrhage               | 5.4% (2.5–9.1%)     | 17.4 (7.7–32.5)         | -65.3% (-77.9 to -45.4%) | 4.5% (2.1–7.6%)     | 0.7 (0.3–1.2)           | -69.1% (-81.4 to -50.2%) |
|                                            | Subarachnoid haemorrhage                | 6% (2.7–10.4%)      | 3.9 (1.7–7.2)           | -66.9% (-80.8 to -40.6%) | 4.9% (2.3–8.2%)     | 0.1 (0–0.2)             | -72.3% (-84.9 to -45%)   |
| Diet low in vegetables                     | Stroke                                  | 0.6% (0.2–1.3%)     | 9 (3.2–19.6)            | -77.1% (-87.6 to -49.3%) | 0.7% (0.2–1.3%)     | 0.5 (0.2–1.1)           | -71.8% (-84.7 to -43.1%) |
|                                            | Ischaemic stroke                        | 0.6% (0.2–1.3%)     | 6.7 (2.1–15)            | -62.7% (-80.4 to -5.1%)  | 0.7% (0.2–1.4%)     | 0.4 (0.1–0.9)           | -56.2% (-76.6 to -11.1%) |
|                                            | Intracerebral haemorrhage               | 0.6% (0.2–2%)       | 2 (0.5–6.6)             | -88.8% (-95.3 to -58.3%) | 0.7% (0.2–2.3%)     | 0.1 (0–0.3)             | -87.3% (-94.5 to -60.3%) |
|                                            | Subarachnoid haemorrhage                | 0.6% (0.2–2%)       | 0.4 (0.1–1.3)           | -90.3% (-96.2 to -56.8%) | 0.7% (0.2–2.2%)     | <0.1 (<0.1–0.1)         | -89.4% (-96 to -60.3%)   |
| Diet low in whole grains                   | Stroke                                  | 5.8% (2.7–7.6%)     | 84.9 (40–125.7)         | 6.5% (-20.9 to 38.6%)    | 5.4% (2.6–7.1%)     | 4.3 (2.1–6.4)           | -2.5% (-31.3 to 29.4%)   |

**Table S16** Regional and national disabilities and deaths related to neurological conditions attributable to risk factors in North Africa and Middle East countries

| Location<br>Risk factor (alphabetic order) | Cause                                   | DALYs (95% UI)     |                     |                           | Deaths (95% UI)    |                  |                          |
|--------------------------------------------|-----------------------------------------|--------------------|---------------------|---------------------------|--------------------|------------------|--------------------------|
|                                            |                                         | PAF (%)            | Rate per 100,000    | Rate change (%)           | PAF (%)            | Rate per 100,000 | Rate change (%)          |
|                                            |                                         | 2019               | 2019                | From 1990 to 2019         | 2019               | 2019             | From 1990 to 2019        |
| Dietary risks                              | Ischaemic stroke                        | 7.8% (3.6–10.3%)   | 84.9 (40–125.7)     | 6.5% (-20.9 to 38.6%)     | 6.8% (3.4–8.9%)    | 4.3 (2.1–6.4)    | -2.5% (-31.3 to 29.4%)   |
|                                            | Stroke                                  | 14.7% (10.3–19.8%) | 217.8 (139.4–317)   | -32.2% (-51.4 to -7%)     | 12.9% (9.1–17.1%)  | 10.3 (6.6–15.1)  | -34.2% (-53.1 to -9.8%)  |
|                                            | Ischaemic stroke                        | 15.5% (10–20.4%)   | 168.5 (103.9–248.1) | -6.1% (-31.2 to 24.6%)    | 13.4% (8.8–17.5%)  | 8.4 (5.2–12.7)   | -13.3% (-39.6 to 14.6%)  |
|                                            | Intracerebral haemorrhage               | 12.6% (7.2–19%)    | 40.6 (21.8–65.7)    | -64.8% (-76.8 to -45.6%)  | 11% (6.4–16.6%)    | 1.6 (0.9–2.6)    | -68.2% (-79 to -50.9%)   |
|                                            | Subarachnoid haemorrhage                | 13.4% (7.7–19.6%)  | 8.7 (4.5–13.9)      | -67.2% (-81.5 to -42.1%)  | 11.4% (6.4–17.2%)  | 0.3 (0.1–0.4)    | -71.7% (-84.9 to -46.4%) |
| Environmental/occupational risk factors§   | Meningitis                              | 0.9% (0.3–1.9%)    | 0.4 (0.1–0.8)       | -77.4% (-94.5 to -17.8%)  | 0.5% (0.2–1.1%)    | <0.1 (<0.1–<0.1) | -77.4% (-94.5 to -17.8%) |
|                                            | Encephalitis                            | 0.4% (0.1–1%)      | 0.1 (0–0.2)         | -24.2% (-81.6 to 188.9%)  | 0.3% (0.1–0.7%)    | <0.1 (<0.1–<0.1) | -24.2% (-81.6 to 188.9%) |
|                                            | Stroke                                  | 30.5% (24.6–36.3%) | 450.1 (323.2–608.3) | -28.3% (-46.1 to -4.5%)   | 28% (22.3–33.7%)   | 22.4 (15.5–30.4) | -28.2% (-47.5 to -3.3%)  |
| High body-mass index                       | Ischaemic stroke                        | 29.5% (23.8–35.2%) | 321.4 (228.5–434.1) | 1.8% (-25.2 to 34.1%)     | 27.3% (21.6–33%)   | 17.2 (11.9–23.4) | -3.5% (-31.2 to 27.8%)   |
|                                            | Intracerebral haemorrhage               | 33.3% (26.9–39.5%) | 107.3 (73.7–149.5)  | -57.9% (-70.6 to -38.2%)  | 30.8% (24.8–36.9%) | 4.5 (3.1–6.2)    | -60.4% (-72.7 to -41.1%) |
|                                            | Subarachnoid haemorrhage                | 33.3% (27–39.6%)   | 21.5 (14.3–30.4)    | -62.4% (-77.2 to -35.4%)  | 31.5% (25.6–37.7%) | 0.7 (0.5–1.1)    | -65.3% (-79.9 to -37.2%) |
|                                            | Stroke                                  | 30.4% (20.4–39.8%) | 450 (280.8–668)     | -6.6% (-32.8 to 31.4%)    | 19.4% (11.9–27.6%) | 15.6 (8.8–24.7)  | -7.1% (-35.8 to 34.9%)   |
|                                            | Ischaemic stroke                        | 25.1% (16–34.2%)   | 273.4 (161.9–414.9) | 55.1% (9.2 to 116.3%)     | 16% (9.3–24.2%)    | 10.1 (5.4–16.6)  | 48.4% (-1.9 to 119.9%)   |
|                                            | Intracerebral haemorrhage               | 44.8% (32.2–56.8%) | 144.5 (90.6–213.4)  | -40.8% (-60.2 to -11.1%)  | 31.8% (21–43.6%)   | 4.6 (2.7–7.2)    | -43.6% (-62.9 to -12.8%) |
|                                            | Subarachnoid haemorrhage                | 49.7% (36.9–61.4%) | 32.1 (20.7–45.8)    | -47.8% (-69.2 to -10.8%)  | 35.5% (24.4–47.4%) | 0.8 (0.5–1.3)    | -53.7% (-74.3 to -13.9%) |
| High fasting plasma glucose                | Neurological disorders*                 | 5.5% (1.6–12.5%)   | 72.2 (19.8–179.5)   | 48.9% (17.9 to 112.6%)    | 13.2% (4.8–25%)    | 4.6 (0.8–13.7)   | 50.6% (10.7 to 141.5%)   |
|                                            | Alzheimer's disease and other dementias | 18% (7.5–32.7%)    | 72.2 (19.8–179.5)   | 48.9% (17.9 to 112.6%)    | 17.3% (7–31.5%)    | 4.6 (0.8–13.7)   | 50.6% (10.7 to 141.5%)   |
|                                            | Stroke                                  | 31.8% (19.1–52.3%) | 470.3 (273.5–802.5) | 17.2% (-18.8 to 69.6%)    | 32.4% (17.5–62.6%) | 25.9 (13.6–48.4) | 4.9% (-28.2 to 52.7%)    |
|                                            | Ischaemic stroke                        | 33.1% (16.9–60.8%) | 361.2 (182.8–667.7) | 49.2% (4.9 to 113.5%)     | 32.8% (15.2–72%)   | 20.7 (9.3–43.3)  | 30.1% (-9.5 to 87.1%)    |
|                                            | Intracerebral haemorrhage               | 28.9% (18.2–42%)   | 93.1 (52–146.9)     | -30.6% (-53.3 to 7.7%)    | 30.8% (18.9–48.3%) | 4.5 (2.4–7.7)    | -40.3% (-59.1 to -8.7%)  |
|                                            | Subarachnoid haemorrhage                | 24.8% (15.8–35.8%) | 16 (9.1–26.2)       | -36.1% (-63.1 to 22.2%)   | 29.5% (17.8–45.6%) | 0.7 (0.4–1.2)    | -45.2% (-69.4 to 9.3%)   |
| High LDL cholesterol                       | Neurological disorders*                 | 4.6% (0.8–12.6%)   | 60.5 (11.2–188.6)   | 57.5% (32.1 to 108.1%)    | 11.6% (2.6–25.5%)  | 4 (0.4–14.8)     | 55% (21.8 to 122.8%)     |
|                                            | Alzheimer's disease and other dementias | 15.1% (3.8–30.6%)  | 60.5 (11.2–188.6)   | 57.5% (32.1 to 108.1%)    | 15.2% (3.9–30.9%)  | 4 (0.4–14.8)     | 55% (21.8 to 122.8%)     |
|                                            | Stroke                                  | 17.2% (9.5–29.9%)  | 254.4 (128.5–469.8) | 16.1% (-12.4 to 56%)      | 15.7% (5.3–33.2%)  | 12.6 (3.9–28.5)  | 5.6% (-23.6 to 45.4%)    |
| High systolic blood pressure               | Ischaemic stroke                        | 23.3% (12.9–39.7%) | 254.4 (128.5–469.8) | 16.1% (-12.4 to 56%)      | 19.8% (6.8–41.1%)  | 12.6 (3.9–28.5)  | 5.6% (-23.6 to 45.4%)    |
|                                            | Stroke                                  | 48.9% (40.2–57.2%) | 723.1 (510.8–965.7) | -21.8% (-42.9 to 6.4%)    | 44.4% (34.7–54.6%) | 35.5 (23.8–49.7) | -24.2% (-46.5 to 5.4%)   |
|                                            | Ischaemic stroke                        | 46.7% (36.3–56.7%) | 509.4 (351.5–692.7) | 10.6% (-20.4 to 50.5%)    | 42.3% (31.1–54.4%) | 26.7 (17–38.6)   | 2.8% (-29.8 to 43.4%)    |
|                                            | Intracerebral haemorrhage               | 55.2% (45.7–64.8%) | 178.2 (124.7–248.1) | -53.4% (-68.3 to -30.3%)  | 52.2% (40.3–64.2%) | 7.6 (5.1–10.7)   | -57.2% (-70.7 to -36%)   |
|                                            | Subarachnoid haemorrhage                | 55% (45.6–64.6%)   | 35.5 (24.5–50.9)    | -56.9% (-74.3 to -24.9%)  | 52.8% (41.7–64%)   | 1.2 (0.8–1.8)    | -61.9% (-78.4 to -28.8%) |
| High temperature                           | Stroke                                  | 0.8% (-0.3–3.2%)   | 12.4 (-4.5–44)      | -14.3% (-289.3 to 235.2%) | 1% (-0.4–3.7%)     | 0.8 (-0.3–2.7)   | -9.6% (-292.5 to 252.9%) |
|                                            | Ischaemic stroke                        | 0.8% (-0.3–3.1%)   | 8.9 (-3.2–31.4)     | 21.7% (-366 to 373.3%)    | 1% (-0.4–3.7%)     | 0.6 (-0.2–2.1)   | 18% (-347.1 to 361.1%)   |

**Table S16** Regional and national disabilities and deaths related to neurological conditions attributable to risk factors in North Africa and Middle East countries

| Location<br>Risk factor (alphabetic order) | Cause                                   | DALYs (95% UI)     |                      |                           | Deaths (95% UI)    |                  |                          |
|--------------------------------------------|-----------------------------------------|--------------------|----------------------|---------------------------|--------------------|------------------|--------------------------|
|                                            |                                         | PAF (%)            | Rate per 100,000     | Rate change (%)           | PAF (%)            | Rate per 100,000 | Rate change (%)          |
|                                            |                                         | 2019               | 2019                 | From 1990 to 2019         | 2019               | 2019             | From 1990 to 2019        |
| Household air pollution from solid fuels   | Intracerebral haemorrhage               | 0.9% (-0.3–3.5%)   | 2.9 (-1–10.6)        | -49.4% (-213.3 to 110.9%) | 1% (-0.4–3.7%)     | 0.1 (-0.1–0.5)   | -51% (-210.2 to 102.1%)  |
|                                            | Subarachnoid haemorrhage                | 0.8% (-0.3–3.2%)   | 0.5 (-0.2–2.2)       | -59.5% (-188.1 to 70.4%)  | 1% (-0.4–3.7%)     | <0.1 (<0.1–0.1)  | -57.1% (-195.8 to 93.6%) |
|                                            | Meningitis                              | 0% (0–0%)          | <0.1 (<0.1–<0.1)     | -99.7% (-99.9 to -98.8%)  | 0% (0–0%)          | <0.1 (<0.1–<0.1) | -99.7% (-99.9 to -98.8%) |
|                                            | Encephalitis                            | 0% (0–0%)          | <0.1 (<0.1–<0.1)     | -99% (-99.8 to -95.5%)    | 0% (0–0%)          | <0.1 (<0.1–<0.1) | -99% (-99.8 to -95.5%)   |
|                                            | Stroke                                  | 0.1% (0–0.2%)      | 1 (0.3–2.3)          | -99.1% (-99.6 to -97.7%)  | 0.1% (0–0.1%)      | <0.1 (<0.1–0.1)  | -99.1% (-99.7 to -97.7%) |
|                                            | Ischaemic stroke                        | 0.1% (0–0.2%)      | 0.7 (0.2–1.6)        | -98.7% (-99.5 to -96.7%)  | 0.1% (0–0.1%)      | <0.1 (<0.1–0.1)  | -98.8% (-99.5 to -96.9%) |
|                                            | Intracerebral haemorrhage               | 0.1% (0–0.2%)      | 0.2 (0.1–0.6)        | -99.5% (-99.8 to -98.6%)  | 0.1% (0–0.2%)      | <0.1 (<0.1–<0.1) | -99.5% (-99.8 to -98.7%) |
| Kidney dysfunction                         | Subarachnoid haemorrhage                | 0.1% (0–0.2%)      | 0.1 (0–0.1)          | -99.5% (-99.8 to -98.6%)  | 0.1% (0–0.2%)      | <0.1 (<0.1–<0.1) | -99.6% (-99.9 to -98.7%) |
|                                            | Stroke                                  | 11.5% (8.6–14.2%)  | 169.5 (117.6–232.5)  | 14.4% (-17.3 to 53.7%)    | 10.6% (6.5–14.3%)  | 8.4 (5–12.4)     | 8.9% (-24.4 to 48.7%)    |
|                                            | Ischaemic stroke                        | 12.5% (8.6–15.9%)  | 136.1 (89.4–190)     | 49% (10.5 to 96.5%)       | 10.7% (5.6–15.2%)  | 6.7 (3.5–10.5)   | 39.5% (-2.9 to 90.1%)    |
| Lead exposure                              | Intracerebral haemorrhage               | 10.4% (8.3–12.5%)  | 33.4 (23.2–46.7)     | -41.2% (-59.2 to -12.6%)  | 11.8% (8.6–14.8%)  | 1.7 (1.1–2.4)    | -41.7% (-59.5 to -15%)   |
|                                            | Stroke                                  | 4.1% (2.2–6.1%)    | 60.6 (29.7–97.9)     | -40.8% (-59.1 to -20%)    | 4.3% (2.4–6.4%)    | 3.4 (1.8–5.5)    | -33.2% (-53.4 to -9.6%)  |
|                                            | Ischaemic stroke                        | 4.1% (2.2–6.2%)    | 44.6 (21.2–72.8)     | -10.3% (-36 to 17.9%)     | 4.1% (2.3–6.3%)    | 2.6 (1.3–4.4)    | -5% (-32.5 to 25.5%)     |
| Low birth weight                           | Intracerebral haemorrhage               | 4.2% (2.6–8%)      | 13.7 (6–23.6)        | -68.6% (-79.9 to -53.5%)  | 4.8% (2.5–7.5%)    | 0.7 (0.3–1.2)    | -65.5% (-76.2 to -50.1%) |
|                                            | Subarachnoid haemorrhage                | 3.6% (1.5–6.1%)    | 2.4 (0.9–4.4)        | -74% (-85.9 to -54.9%)    | 4.5% (2.3–7.1%)    | 0.1 (0–0.2)      | -70.7% (-83.5 to -46.5%) |
|                                            | Meningitis                              | 5.3% (3.1–8.4%)    | 2 (1.1–3.3)          | -79.3% (-90.4 to -56.3%)  | 3% (1.7–4.8%)      | <0.1 (<0.1–<0.1) | -79.3% (-90.4 to -56.3%) |
| Low birth weight and short gestation       | Encephalitis                            | 2.4% (1.1–4.5%)    | 0.4 (0.2–0.7)        | -29.8% (-74.1 to 78.4%)   | 1.5% (0.7–2.9%)    | <0.1 (<0.1–<0.1) | -29.8% (-74.1 to 78.4%)  |
|                                            | Meningitis                              | 5.9% (3.5–9.3%)    | 2.2 (1.2–3.7)        | -78.6% (-90 to -55.1%)    | 3.3% (1.9–5.4%)    | <0.1 (<0.1–<0.1) | -78.6% (-90 to -55.1%)   |
| Low physical activity                      | Encephalitis                            | 2.7% (1.3–5%)      | 0.5 (0.2–0.8)        | -26.6% (-72.3 to 80.1%)   | 1.7% (0.8–3.3%)    | <0.1 (<0.1–<0.1) | -26.6% (-72.3 to 80.1%)  |
|                                            | Stroke                                  | 2.8% (0.4–7.6%)    | 40.6 (6.1–115.4)     | 19.1% (-13 to 59.9%)      | 3.5% (0.6–9.5%)    | 2.8 (0.5–7.7)    | 13.2% (-18.6 to 57.2%)   |
| Low temperature                            | Ischaemic stroke                        | 3.7% (0.6–10.3%)   | 40.6 (6.1–115.4)     | 19.1% (-13 to 59.9%)      | 4.5% (0.7–11.9%)   | 2.8 (0.5–7.7)    | 13.2% (-18.6 to 57.2%)   |
|                                            | Stroke                                  | 5.2% (1.3–9.3%)    | 76.3 (19–147.7)      | -26.1% (-51 to 0.2%)      | 6% (1.5–10.8%)     | 4.8 (1.2–9)      | -22.1% (-47.5 to 3.2%)   |
|                                            | Ischaemic stroke                        | 5% (1.2–9.1%)      | 54.9 (13.3–105.2)    | 5% (-31.3 to 42.4%)       | 6% (1.5–10.8%)     | 3.8 (0.9–7.2)    | 1.7% (-31 to 34.6%)      |
| Metabolic risk factors†                    | Intracerebral haemorrhage               | 5.6% (1.4–10.1%)   | 18.1 (4.6–35.6)      | -56.4% (-71.7 to -37.3%)  | 6% (1.5–10.8%)     | 0.9 (0.2–1.7)    | -57.9% (-72.1 to -38.4%) |
|                                            | Subarachnoid haemorrhage                | 5.1% (1.2–9.3%)    | 3.3 (0.9–6.7)        | -65.1% (-80.2 to -38%)    | 6% (1.5–10.8%)     | 0.1 (0–0.3)      | -62.9% (-79.6 to -34.1%) |
|                                            | Stroke                                  | 73.8% (65.7–82.3%) | 1091.1 (811.6–1428)  | -15.4% (-38.1 to 11.9%)   | 69.5% (58.8–82.8%) | 55.6 (39.6–74.9) | -18% (-41.2 to 9.9%)     |
|                                            | Ischaemic stroke                        | 73.8% (64.1–85.4%) | 804.8 (592.3–1053.9) | 14.9% (-14.8 to 50.3%)    | 69% (56.1–85.7%)   | 43.6 (30.3–60.4) | 6.7% (-23.7 to 42.8%)    |
|                                            | Intracerebral haemorrhage               | 74.5% (66.6–81.4%) | 240.5 (172.1–323.7)  | -50.7% (-65.9 to -27.6%)  | 71.8% (62.5–81.3%) | 10.4 (7.5–14.1)  | -54.7% (-68.4 to -32.9%) |
|                                            | Subarachnoid haemorrhage                | 71% (62.3–78.4%)   | 45.8 (31.9–63.9)     | -54.6% (-72.4 to -21.7%)  | 68.6% (58.5–77.9%) | 1.6 (1–2.3)      | -59.9% (-76.9 to -24.8%) |
| Non-optimal temperature                    | Neurological disorders*                 | 9.3% (3.2–20%)     | 121.9 (36.1–303.1)   | 47.8% (20.1 to 99.6%)     | 22.8% (9.3–38.7%)  | 7.9 (1.4–23.5)   | 47.8% (12.5 to 120.7%)   |
|                                            | Alzheimer's disease and other dementias | 30.4% (14.6–48.7%) | 121.9 (36.1–303.1)   | 47.8% (20.1 to 99.6%)     | 29.9% (13.9–47.9%) | 7.9 (1.4–23.5)   | 47.8% (12.5 to 120.7%)   |
| Non-optimal temperature                    | Stroke                                  | 6% (2.8–9.5%)      | 88.1 (39–152.7)      | -24.7% (-50.7 to 7.1%)    | 6.9% (3.2–11.1%)   | 5.5 (2.4–9.3)    | -20.7% (-49.1 to 10%)    |

**Table S16** Regional and national disabilities and deaths related to neurological conditions attributable to risk factors in North Africa and Middle East countries

| Location<br>Risk factor (alphabetic order) | Cause                                   | DALYs (95% UI)       |                     |                          | Deaths (95% UI)      |                  |                          |
|--------------------------------------------|-----------------------------------------|----------------------|---------------------|--------------------------|----------------------|------------------|--------------------------|
|                                            |                                         | PAF (%)              | Rate per 100,000    | Rate change (%)          | PAF (%)              | Rate per 100,000 | Rate change (%)          |
|                                            |                                         | 2019                 | 2019                | From 1990 to 2019        | 2019                 | 2019             | From 1990 to 2019        |
| Other environmental risks                  | Ischaemic stroke                        | 5.8% (2.7–9.3%)      | 63.4 (27.8–110.1)   | 6.9% (-32.8 to 52.8%)    | 6.9% (3.2–11.1%)     | 4.4 (1.9–7.4)    | 3.6% (-34.6 to 42.7%)    |
|                                            | Intracerebral haemorrhage               | 6.5% (3–10.4%)       | 20.9 (9.2–36.6)     | -55.6% (-71 to -33%)     | 6.9% (3.2–11.1%)     | 1 (0.4–1.7)      | -57.1% (-71 to -33.8%)   |
|                                            | Subarachnoid haemorrhage                | 5.9% (2.7–9.4%)      | 3.8 (1.6–6.9)       | -64.4% (-80.3 to -35.4%) | 6.9% (3.2–11.1%)     | 0.2 (0.1–0.3)    | -62.2% (-79.3 to -29.6%) |
|                                            | Stroke                                  | 4.1% (2.2–6.1%)      | 60.6 (29.7–97.9)    | -40.8% (-59.1 to -20%)   | 4.3% (2.4–6.4%)      | 3.4 (1.8–5.5)    | -33.2% (-53.4 to -9.6%)  |
|                                            | Ischaemic stroke                        | 4.1% (2.2–6.2%)      | 44.6 (21.2–72.8)    | -10.3% (-36 to 17.9%)    | 4.1% (2.3–6.3%)      | 2.6 (1.3–4.4)    | -5% (-32.5 to 25.5%)     |
| Particulate matter pollution               | Intracerebral haemorrhage               | 4.2% (2–6.8%)        | 13.7 (6–23.6)       | -68.6% (-79.9 to -53.5%) | 4.8% (2.5–7.5%)      | 0.7 (0.3–1.2)    | -65.5% (-76.2 to -50.1%) |
|                                            | Subarachnoid haemorrhage                | 3.6% (1.5–6.1%)      | 2.4 (0.9–4.4)       | -74% (-85.9 to -54.9%)   | 4.5% (2.3–7.1%)      | 0.1 (0–0.2)      | -70.7% (-83.5 to -46.5%) |
|                                            | Meningitis                              | 0.9% (0.3–1.9%)      | 0.4 (0.1–0.8)       | -77.4% (-94.5 to -17.8%) | 0.5% (0.2–1.1%)      | <0.1 (<0.1–<0.1) | -77.4% (-94.5 to -17.8%) |
|                                            | Encephalitis                            | 0.4% (0.1–1%)        | 0.1 (0–0.2)         | -24.2% (-81.6 to 188.9%) | 0.3% (0.1–0.7%)      | <0.1 (<0.1–<0.1) | -24.2% (-81.6 to 188.9%) |
|                                            | Stroke                                  | 22.9% (17.4–28.5%)   | 337.9 (232.8–472.5) | -27.7% (-46.3 to -3.9%)  | 19.3% (14.3–24.3%)   | 15.4 (10.1–22)   | -29.9% (-49.1 to -5.2%)  |
| Secondhand smoke                           | Ischaemic stroke                        | 21.9% (16.6–27.5%)   | 238.8 (164.3–334.5) | 2.2% (-24.2 to 34.7%)    | 18.5% (13.7–23.5%)   | 11.7 (7.8–16.7)  | -5.8% (-34.5 to 25.6%)   |
|                                            | Intracerebral haemorrhage               | 25.4% (19.4–31.5%)   | 82.1 (54.5–115.5)   | -56.9% (-70.3 to -36.3%) | 22% (16.7–27.6%)     | 3.2 (2.1–4.5)    | -60.5% (-73.1 to -41.4%) |
|                                            | Subarachnoid haemorrhage                | 26.4% (20.5–32.5%)   | 17 (11.1–24.6)      | -60.5% (-76.2 to -32.2%) | 23% (17.5–28.5%)     | 0.5 (0.3–0.8)    | -65.3% (-80 to -36.9%)   |
|                                            | Stroke                                  | 4.2% (3.2–5.3%)      | 62.1 (41.4–87.8)    | -37.1% (-53.9 to -14.5%) | 3.5% (2.6–4.4%)      | 2.8 (1.8–4)      | -38.9% (-56 to -16.1%)   |
|                                            | Ischaemic stroke                        | 3.9% (2.9–4.9%)      | 42.1 (28–60)        | -8.6% (-34.1 to 24.9%)   | 3.3% (2.4–4.2%)      | 2.1 (1.3–3)      | -17.1% (-41.6 to 14.4%)  |
| Short gestation                            | Intracerebral haemorrhage               | 5.1% (3.8–6.4%)      | 16.5 (10.5–24.2)    | -61.3% (-74.4 to -42.8%) | 4.2% (3.2–5.3%)      | 0.6 (0.4–0.9)    | -64.5% (-76.2 to -46.8%) |
|                                            | Subarachnoid haemorrhage                | 5.4% (4–7%)          | 3.5 (2.2–5.4)       | -65.3% (-79.7 to -38.9%) | 4.6% (3.5–5.9%)      | 0.1 (0.1–0.2)    | -69% (-82.4 to -43.4%)   |
|                                            | Meningitis                              | 4.2% (2.5–6.7%)      | 1.6 (0.9–2.6)       | -74.3% (-87.9 to -47.7%) | 2.4% (1.3–3.9%)      | <0.1 (<0.1–<0.1) | -74.3% (-87.9 to -47.7%) |
|                                            | Encephalitis                            | 1.9% (0.9–3.6%)      | 0.3 (0.2–0.6)       | -11.7% (-66.5 to 112.4%) | 1.2% (0.6–2.4%)      | <0.1 (<0.1–<0.1) | -11.7% (-66.5 to 112.4%) |
|                                            | Stroke                                  | 15% (13.4–16.8%)     | 222.5 (164.3–293.1) | -32.7% (-53 to -6.1%)    | 11.7% (10.2–13.3%)   | 9.3 (6.7–12.4)   | -35.2% (-55.7 to -8.2%)  |
| Smoking                                    | Ischaemic stroke                        | 14.2% (12.5–15.8%)   | 154.6 (113.1–205.6) | -4.5% (-33.3 to 32.4%)   | 10.9% (9.3–12.4%)    | 6.9 (4.9–9.2)    | -10.8% (-41 to 26.1%)    |
|                                            | Intracerebral haemorrhage               | 17.8% (15.6–20.1%)   | 57.5 (40–78.9)      | -59.2% (-72.8 to -38.2%) | 14.7% (12.8–16.9%)   | 2.1 (1.5–2.9)    | -62.6% (-75.4 to -42.4%) |
|                                            | Subarachnoid haemorrhage                | 16% (11.9–19.7%)     | 10.4 (6.6–16.1)     | -62.5% (-79 to -28.8%)   | 14.3% (9.9–18%)      | 0.3 (0.2–0.5)    | -66.9% (-82.9 to -32.8%) |
|                                            | Neurological disorders*                 | 4.7% (1.6–9.7%)      | 62.4 (20.1–151.7)   | -17.3% (-33.8 to 9.5%)   | 10% (3.1–16.3%)      | 3.6 (0.4–11.1)   | -16% (-39.4 to 28.6%)    |
|                                            | Alzheimer's disease and other dementias | 17.1% (11.6–22.7%)   | 68.8 (27.1–161.7)   | -17.5% (-34.3 to 6.7%)   | 15.4% (10.1–20.7%)   | 4.1 (0.9–11.7)   | -15.7% (-37 to 19.1%)    |
| Tobacco                                    | Parkinson's disease                     | -12.1% (-18.6–-6.1%) | -8.8 (-14.4–-4.2)   | -12.8% (-38.8 to 22.4%)  | -11.3% (-17.2–-5.7%) | -0.5 (-0.8–0.2)  | -12.3% (-41.1 to 25.9%)  |
|                                            | Multiple sclerosis                      | 11.1% (8.1–14.1%)    | 2.5 (1.6–3.4)       | 11.5% (-15.6 to 43.6%)   | 12.8% (8.9–17.5%)    | <0.1 (<0.1–0.1)  | 9.5% (-35.8 to 75%)      |
|                                            | Stroke                                  | 18.6% (16.8–20.5%)   | 275.4 (202.5–364.6) | -33.3% (-52 to -8.7%)    | 14.7% (13.1–16.5%)   | 11.8 (8.4–15.8)  | -35.7% (-54.8 to -10.3%) |
|                                            | Ischaemic stroke                        | 17.5% (15.7–19.4%)   | 190.7 (141.5–252.2) | -5% (-32.8 to 28.6%)     | 13.7% (12–15.5%)     | 8.7 (6.2–11.7)   | -12% (-39.7 to 22.2%)    |
|                                            | Intracerebral haemorrhage               | 22.1% (19.8–24.6%)   | 71.3 (51–97.4)      | -59.4% (-72.9 to -39.8%) | 18.3% (16.3–20.6%)   | 2.7 (1.9–3.6)    | -62.8% (-75.3 to -43.5%) |
| Neurological disorders*                    | Subarachnoid haemorrhage                | 20.7% (16.8–24.4%)   | 13.4 (8.6–20)       | -63% (-78.4 to -34.8%)   | 18.3% (14.2–21.9%)   | 0.4 (0.3–0.7)    | -67.2% (-82.1 to -37.4%) |
|                                            | Neurological disorders*                 | 4.7% (1.6–9.7%)      | 62.4 (20.1–151.7)   | -17.3% (-33.8 to 9.5%)   | 10% (3.1–16.3%)      | 3.6 (0.4–11.1)   | -16% (-39.4 to 28.6%)    |

**Table S16** Regional and national disabilities and deaths related to neurological conditions attributable to risk factors in North Africa and Middle East countries

| Location<br>Risk factor (alphabetic order) | Cause                                   | DALYs (95% UI)      |                     |                            | Deaths (95% UI)     |                  |                           |
|--------------------------------------------|-----------------------------------------|---------------------|---------------------|----------------------------|---------------------|------------------|---------------------------|
|                                            |                                         | PAF (%)             | Rate per 100,000    | Rate change (%)            | PAF (%)             | Rate per 100,000 | Rate change (%)           |
|                                            |                                         | 2019                | 2019                | From 1990 to 2019          | 2019                | 2019             | From 1990 to 2019         |
|                                            | Alzheimer's disease and other dementias | 17.1% (11.6–22.7%)  | 68.8 (27.1–161.7)   | -17.5% (-34.3 to 6.7%)     | 15.4% (10.1–20.7%)  | 4.1 (0.9–11.7)   | -15.7% (-37 to 19.1%)     |
|                                            | Parkinson's disease                     | -12.1% (-18.6–6.1%) | -8.8 (-14.4–4.2)    | -12.8% (-38.8 to 22.4%)    | -11.3% (-17.2–5.7%) | -0.5 (-0.8–0.2)  | -12.3% (-41.1 to 25.9%)   |
|                                            | Multiple sclerosis                      | 11.1% (8.1–14.1%)   | 2.5 (1.6–3.4)       | 11.5% (-15.6 to 43.6%)     | 12.8% (8.9–17.5%)   | <0.1 (<0.1–0.1)  | 9.5% (-35.8 to 75%)       |
| <b>Türkiye</b>                             |                                         |                     |                     |                            |                     |                  |                           |
| Air pollution                              | Meningitis                              | 0.2% (0.1–0.5%)     | 0.1 (0–0.1)         | -93.8% (-98.2 to -78.9%)   | 0.2% (0.1–0.3%)     | <0.1 (<0.1–<0.1) | -93.8% (-98.2 to -78.9%)  |
|                                            | Encephalitis                            | 0.1% (0–0.3%)       | <0.1 (<0.1–0.1)     | -58.4% (-91.2 to 62.5%)    | 0.1% (0–0.2%)       | <0.1 (<0.1–<0.1) | -58.4% (-91.2 to 62.3%)   |
|                                            | Stroke                                  | 20.4% (17.2–23.8%)  | 237.9 (183.1–302.9) | -31.9% (-50.9 to -12.3%)   | 17.1% (14.3–20.1%)  | 10.4 (7.7–13.6)  | -27.2% (-48.3 to -4.6%)   |
|                                            | Ischaemic stroke                        | 18.9% (15.8–22.1%)  | 125.1 (95.5–157.4)  | -18.8% (-41.8 to 3.5%)     | 15.8% (13.1–18.7%)  | 6.1 (4.5–7.9)    | -14.7% (-41.6 to 15%)     |
|                                            | Intracerebral haemorrhage               | 22.1% (18.7–25.7%)  | 88.3 (66.8–114.8)   | -42% (-59.6 to -23.1%)     | 19.1% (16–22.3%)    | 3.6 (2.6–4.6)    | -38.6% (-57.5 to -17.3%)  |
|                                            | Subarachnoid haemorrhage                | 24.2% (20.6–27.9%)  | 24.4 (17.9–32.5)    | -42.6% (-63.8 to -2.7%)    | 21.1% (17.9–24.4%)  | 0.8 (0.6–1)      | -43.7% (-66.9 to 7.8%)    |
| Alcohol use                                | Stroke                                  | 1.2% (0.5–1.8%)     | 13.8 (6–22.7)       | -26.1% (-59 to 29.8%)      | 0.7% (0.2–1.2%)     | 0.4 (0.1–0.8)    | -23.3% (-66.3 to 55.2%)   |
|                                            | Ischaemic stroke                        | 0% (-0.5–0.6%)      | 0.2 (-3–4)          | -186.5% (-843.5 to 727.2%) | -0.1% (-0.5–0.3%)   | 0 (-0.2–0.1)     | -35.8% (-582.1 to 692.5%) |
|                                            | Intracerebral haemorrhage               | 3.4% (2.4–9%)       | 13.6 (7.5–20.6)     | -28.3% (-56.7 to 9.3%)     | 2.4% (1.4–3.5%)     | 0.5 (0.2–0.7)    | -24.5% (-54.6 to 18.7%)   |
|                                            | Neurological disorders*                 | 0.7% (0.3–1.4%)     | 9.8 (4.2–18.1)      | 1.5% (-52.2 to 125.2%)     | 0.3% (0.1–0.6%)     | 0.1 (0–0.1)      | -5.6% (-50.9 to 56.2%)    |
|                                            | Idiopathic epilepsy                     | 4.6% (2.9–6.4%)     | 9.8 (4.2–18.1)      | 1.5% (-52.2 to 125.2%)     | 4.7% (2.9–6.7%)     | 0.1 (0–0.1)      | -5.6% (-50.9 to 56.2%)    |
| All risk factors                           | Meningitis                              | 2% (1.3–3.2%)       | 0.5 (0.3–0.9)       | -93.6% (-96.9 to -86.5%)   | 1.2% (0.8–2%)       | <0.1 (<0.1–<0.1) | -93.6% (-96.9 to -86.5%)  |
|                                            | Encephalitis                            | 0.9% (0.4–2%)       | 0.2 (0.1–0.4)       | -58.2% (-84.1 to -4.5%)    | 0.6% (0.3–1.4%)     | <0.1 (<0.1–<0.1) | -58.2% (-84.1 to -4.5%)   |
|                                            | Stroke                                  | 85.2% (81.4–89.1%)  | 991 (816.3–1187.1)  | -21.6% (-42.2 to -2.1%)    | 82.3% (76.7–87.9%)  | 49.9 (39.8–61.1) | -15.9% (-39.3 to 7.7%)    |
|                                            | Ischaemic stroke                        | 84.7% (79.3–90.7%)  | 561.7 (464.9–674.1) | -7.5% (-33.4 to 15.5%)     | 81.7% (74.2–90.4%)  | 31.3 (24.7–38.6) | -3.3% (-32.9 to 27.3%)    |
|                                            | Intracerebral haemorrhage               | 86.1% (82–89.9%)    | 343.8 (276.2–421.9) | -34.1% (-53.1 to -14.9%)   | 83.6% (77.3–89%)    | 15.6 (12.3–19.4) | -29.6% (-49.3 to -7.9%)   |
|                                            | Subarachnoid haemorrhage                | 84.6% (80.8–88.2%)  | 85.4 (66.2–105.7)   | -36.8% (-60.3 to 10.3%)    | 82.9% (77.1–87.9%)  | 3 (2.3–3.8)      | -37.9% (-62.9 to 22.7%)   |
|                                            | Neurological disorders*                 | 11.5% (4.9–21.8%)   | 168.1 (67.4–395.1)  | 8.2% (-9.4 to 31.7%)       | 25.8% (11.5–41%)    | 9.7 (1.9–28.3)   | 9.3% (-11.6 to 46.6%)     |
|                                            | Alzheimer's disease and other dementias | 41.2% (26.8–56.1%)  | 163.3 (63–389.6)    | 4.9% (-12 to 25%)          | 38.5% (24.5–53.8%)  | 10 (2.2–28.6)    | 5.6% (-14.9 to 31.9%)     |
|                                            | Parkinson's disease                     | -10.9% (-16.6–5.3%) | -8.2 (-13.7–4)      | -41.9% (-57.4 to -21.5%)   | -8.8% (-13.6–4.2%)  | -0.4 (-0.7–0.2)  | -43% (-59.6 to -20.1%)    |
|                                            | Idiopathic epilepsy                     | 4.6% (2.9–6.4%)     | 9.8 (4.2–18.1)      | 1.5% (-52.2 to 125.2%)     | 4.7% (2.9–6.7%)     | 0.1 (0–0.1)      | -5.6% (-50.9 to 56.2%)    |
|                                            | Multiple sclerosis                      | 15.5% (10.5–19.8%)  | 3.2 (2.3–4.4)       | -24.4% (-44.7 to -3.9%)    | 15.4% (10.2–19.8%)  | <0.1 (<0.1–0.1)  | -37.5% (-63.3 to -4.9%)   |
| Ambient particulate matter pollution       | Meningitis                              | 0.2% (0.1–0.5%)     | 0.1 (0–0.1)         | -91.3% (-97.6 to -69.5%)   | 0.2% (0.1–0.3%)     | <0.1 (<0.1–<0.1) | -91.3% (-97.6 to -69.5%)  |
|                                            | Encephalitis                            | 0.1% (0–0.3%)       | <0.1 (<0.1–0.1)     | -41.9% (-87.1 to 139.6%)   | 0.1% (0–0.2%)       | <0.1 (<0.1–<0.1) | -41.9% (-87.2 to 139.5%)  |
|                                            | Stroke                                  | 20.3% (17.2–23.6%)  | 236.5 (182–300.9)   | -9.2% (-34.9 to 22.8%)     | 17% (14.2–20%)      | 10.3 (7.7–13.5)  | -2.8% (-32.8 to 34.3%)    |
|                                            | Ischaemic stroke                        | 18.8% (15.7–22%)    | 124.4 (94.8–156.4)  | 8.5% (-22.1 to 46.2%)      | 15.7% (13–18.6%)    | 6 (4.4–7.9)      | 14.2% (-23.5 to 59.5%)    |
|                                            | Intracerebral haemorrhage               | 22% (18.6–25.6%)    | 87.8 (66.4–114)     | -23.1% (-47.5 to 7.3%)     | 19% (15.9–22.2%)    | 3.5 (2.6–4.6)    | -18.2% (-42.7 to 15.5%)   |



**Table S16** Regional and national disabilities and deaths related to neurological conditions attributable to risk factors in North Africa and Middle East countries

| Location<br>Risk factor (alphabetic order) | Cause                                   | DALYs (95% UI)       |                         |                          | Deaths (95% UI)     |                         |                          |
|--------------------------------------------|-----------------------------------------|----------------------|-------------------------|--------------------------|---------------------|-------------------------|--------------------------|
|                                            |                                         | PAF (%)              | Rate per 100,000        | Rate change (%)          | PAF (%)             | Rate per 100,000        | Rate change (%)          |
|                                            |                                         | 2019                 | 2019                    | From 1990 to 2019        | 2019                | 2019                    | From 1990 to 2019        |
| Behavioural risk factors‡                  | Subarachnoid haemorrhage                | 24% (20.4–27.7%)     | 24.3 (17.8–32.4)        | -23.3% (-52.4 to 39.5%)  | 21% (17.7–24.2%)    | 0.8 (0.6–1)             | -24.9% (-56.4 to 53.1%)  |
|                                            | Meningitis                              | 2% (1.3–3.2%)        | 0.5 (0.3–0.8)           | -93.5% (-96.9 to -86.5%) | 1.2% (0.7–1.9%)     | <0.1 (<0.1–<0.1)        | -93.5% (-96.9 to -86.5%) |
|                                            | Encephalitis                            | 0.9% (0.4–2%)        | 0.2 (0.1–0.3)           | -57.9% (-83.7 to -4.3%)  | 0.6% (0.3–1.3%)     | <0.1 (<0.1–<0.1)        | -57.9% (-83.7 to -4.3%)  |
|                                            | Stroke                                  | 33.6% (29.7–38%)     | 390.6 (306.9–486.9)     | -32.8% (-52.9 to -14.4%) | 28.1% (23.8–33.1%)  | 17 (12.6–21.8)          | -27.9% (-50.7 to -6.4%)  |
|                                            | Ischaemic stroke                        | 33.8% (28.1–40.5%)   | 223.8 (170.6–288.9)     | -18.9% (-43.4 to 1.2%)   | 29.1% (23.1–36.7%)  | 11.2 (7.9–15.1)         | -14.3% (-42.6 to 12.1%)  |
|                                            | Intracerebral haemorrhage               | 32.9% (29.1–37.3%)   | 131.3 (102.4–165.9)     | -45.6% (-63.9 to -27.7%) | 25.8% (22.2–29.8%)  | 4.8 (3.7–6.1)           | -44.2% (-62.5 to -24.9%) |
|                                            | Subarachnoid haemorrhage                | 35.2% (31–39.5%)     | 35.5 (26.7–45.7)        | -44.5% (-65.8 to -3.8%)  | 28.8% (24.8–33.1%)  | 1 (0.8–1.4)             | -46.8% (-68.7 to 2%)     |
|                                            | Neurological disorders*                 | 4.7% (2.1–8.7%)      | 69 (28.6–152.4)         | -18.7% (-34.4 to 7.3%)   | 8.2% (2.6–13.6%)    | 3.1 (0.5–9.1)           | -23.8% (-40.2 to 13.5%)  |
|                                            | Alzheimer's disease and other dementias | 16.2% (10.5–21.7%)   | 64.1 (24.9–147.8)       | -24.6% (-37.9 to -8.4%)  | 13.2% (8.4–18%)     | 3.4 (0.7–9.4)           | -27% (-42.2 to -7.3%)    |
|                                            | Parkinson's disease                     | -10.9% (-16.6–-5.3%) | -8.2 (-13.7–-4)         | -41.9% (-57.4 to -21.5%) | -8.8% (-13.6–-4.2%) | -0.4 (-0.7–-0.2)        | -43% (-59.6 to -20.1%)   |
| Idiopathic epilepsy                        | 4.6% (2.9–6.4%)                         | 9.8 (4.2–18.1)       | 1.5% (-52.2 to 125.2%)  | 4.7% (2.9–6.7%)          | 0.1 (0–0.1)         | -5.6% (-50.9 to 56.2%)  |                          |
| Multiple sclerosis                         | 15.5% (10.5–19.8%)                      | 3.2 (2.3–4.4)        | -24.4% (-44.7 to -3.9%) | 15.4% (10.2–19.8%)       | <0.1 (<0.1–0.1)     | -37.5% (-63.3 to -4.9%) |                          |
| Child and maternal malnutrition            | Meningitis                              | 2% (1.3–3.2%)        | 0.5 (0.3–0.8)           | -93.5% (-96.9 to -86.5%) | 1.2% (0.7–1.9%)     | <0.1 (<0.1–<0.1)        | -93.5% (-96.9 to -86.5%) |
|                                            | Encephalitis                            | 0.9% (0.4–2%)        | 0.2 (0.1–0.3)           | -57.9% (-83.7 to -4.3%)  | 0.6% (0.3–1.3%)     | <0.1 (<0.1–<0.1)        | -57.9% (-83.7 to -4.3%)  |
| Diet high in red meat                      | Stroke                                  | 3.7% (1.4–5.7%)      | 43.3 (16.1–68.8)        | -27.6% (-47.8 to -6.2%)  | 2.8% (1.1–4.4%)     | 1.7 (0.6–2.8)           | -22.8% (-45.9 to 4.7%)   |
|                                            | Ischaemic stroke                        | 3.1% (0.5–4.8%)      | 20.3 (3.3–33.8)         | -13% (-36.2 to 10.1%)    | 2.3% (0.4–3.6%)     | 0.9 (0.1–1.5)           | -7.9% (-38.4 to 25.2%)   |
|                                            | Intracerebral haemorrhage               | 4.4% (0.6–7.1%)      | 17.7 (2.3–30.8)         | -37% (-56.6 to -18.1%)   | 3.6% (0.5–5.9%)     | 0.7 (0.1–1.2)           | -33.1% (-53 to -11.7%)   |
| Diet high in sodium                        | Subarachnoid haemorrhage                | 5.2% (0.8–8.3%)      | 5.3 (0.7–9.3)           | -36.6% (-59.9 to 8.4%)   | 4.2% (0.6–6.8%)     | 0.2 (0–0.3)             | -37.8% (-62.5 to 21%)    |
|                                            | Stroke                                  | 1.3% (0.3–5.5%)      | 15.2 (3.2–65)           | -25.5% (-57.5 to 36.6%)  | 1.1% (0.3–4.5%)     | 0.7 (0.2–2.8)           | -21.2% (-54.8 to 42.4%)  |
|                                            | Ischaemic stroke                        | 1.1% (0.3–4.6%)      | 7.5 (1.8–32.1)          | -11.1% (-52.3 to 66.1%)  | 1% (0.3–3.8%)       | 0.4 (0.1–1.5)           | -7.5% (-50.6 to 71%)     |
| Diet low in fibre                          | Intracerebral haemorrhage               | 1.5% (0.3–6.5%)      | 6.1 (1.1–27.7)          | -35.8% (-65.2 to 18.4%)  | 1.3% (0.3–5.6%)     | 0.2 (0.1–1.1)           | -32.4% (-62.8 to 23%)    |
|                                            | Subarachnoid haemorrhage                | 1.6% (0.3–6.8%)      | 1.6 (0.3–7)             | -34.5% (-67.7 to 46.2%)  | 1.4% (0.3–6.1%)     | 0.1 (0–0.2)             | -36.5% (-69.9 to 47.5%)  |
|                                            | Stroke                                  | 0.5% (0.2–0.9%)      | 5.6 (2.5–11.5)          | -22.4% (-44.4 to 7.3%)   | 0.5% (0.2–1%)       | 0.3 (0.1–0.6)           | -15.5% (-43.5 to 28%)    |
|                                            | Ischaemic stroke                        | 0.5% (0.2–0.9%)      | 3.1 (1.5–6.3)           | -7.7% (-34.2 to 29.1%)   | 0.5% (0.2–1%)       | 0.2 (0.1–0.4)           | -2.7% (-38.8 to 54.9%)   |
|                                            | Intracerebral haemorrhage               | 0.5% (0.2–1%)        | 1.9 (0.9–4)             | -34.9% (-54.7 to -6.7%)  | 0.5% (0.2–1%)       | 0.1 (0–0.2)             | -29.2% (-51.8 to 7.5%)   |
| Diet low in fruits                         | Subarachnoid haemorrhage                | 0.5% (0.2–1.1%)      | 0.5 (0.2–1.2)           | -37.5% (-61.9 to 14.2%)  | 0.5% (0.2–1%)       | <0.1 (<0.1–<0.1)        | -38.8% (-65.2 to 31.1%)  |
|                                            | Stroke                                  | 1.2% (0.7–1.9%)      | 13.8 (7.4–22.9)         | -64.1% (-75.5 to -49.2%) | 0.9% (0.5–1.5%)     | 0.6 (0.3–1)             | -61% (-76.3 to -39%)     |
|                                            | Ischaemic stroke                        | 0.8% (0.3–1.6%)      | 5.5 (1.8–10.4)          | -54% (-69.3 to -24.1%)   | 0.7% (0.3–1.4%)     | 0.3 (0.1–0.5)           | -49.3% (-73.3 to -6.5%)  |
|                                            | Intracerebral haemorrhage               | 1.5% (0.8–2.5%)      | 6.2 (2.8–10.5)          | -69.3% (-80.3 to -55.6%) | 1.3% (0.6–2.2%)     | 0.2 (0.1–0.4)           | -67.3% (-80.1 to -50.2%) |
| Diet low in vegetables                     | Subarachnoid haemorrhage                | 2.2% (1–3.5%)        | 2.2 (0.9–3.7)           | -66.8% (-80.3 to -42.5%) | 1.6% (0.7–2.5%)     | 0.1 (0–0.1)             | -69.3% (-82.7 to -37.6%) |
|                                            | Stroke                                  | 0.2% (0.2–0.2%)      | 2.4 (1.9–2.8)           | -25.1% (-44.8 to -4.3%)  | 0.2% (0.2–0.2%)     | 0.1 (0.1–0.2)           | -23.3% (-48.4 to 4.9%)   |
|                                            | Ischaemic stroke                        | 0.2% (0.2–0.2%)      | 1.4 (1.1–1.7)           | -13.4% (-38.9 to 12%)    | 0.2% (0.2–0.3%)     | 0.1 (0.1–0.1)           | -13% (-46.2 to 22%)      |



**Table S16** Regional and national disabilities and deaths related to neurological conditions attributable to risk factors in North Africa and Middle East countries

| Location<br>Risk factor (alphabetic order) | Cause                                   | DALYs (95% UI)     |                     |                          | Deaths (95% UI)    |                  |                          |
|--------------------------------------------|-----------------------------------------|--------------------|---------------------|--------------------------|--------------------|------------------|--------------------------|
|                                            |                                         | PAF (%)            | Rate per 100,000    | Rate change (%)          | PAF (%)            | Rate per 100,000 | Rate change (%)          |
|                                            |                                         | 2019               | 2019                | From 1990 to 2019        | 2019               | 2019             | From 1990 to 2019        |
| Diet low in whole grains                   | Intracerebral haemorrhage               | 0.2% (0.2–0.2%)    | 0.8 (0.6–1)         | -36.3% (-55.3 to -15.9%) | 0.2% (0.2–0.2%)    | <0.1 (<0.1–<0.1) | -35.2% (-59.1 to -10.2%) |
|                                            | Subarachnoid haemorrhage                | 0.2% (0.2–0.2%)    | 0.2 (0.2–0.2)       | -38.8% (-62.8 to 8.8%)   | 0.2% (0.2–0.2%)    | <0.1 (<0.1–<0.1) | -42.7% (-67.8 to 21.7%)  |
|                                            | Stroke                                  | 5.2% (3–6.5%)      | 60 (34.1–82.5)      | -9.5% (-33.7 to 11.7%)   | 5.2% (3.2–6.4%)    | 3.1 (1.9–4.4)    | -4.7% (-34 to 24.8%)     |
|                                            | Ischaemic stroke                        | 9% (5.2–11.5%)     | 60 (34.1–82.5)      | -9.5% (-33.7 to 11.7%)   | 8.2% (5–10.2%)     | 3.1 (1.9–4.4)    | -4.7% (-34 to 24.8%)     |
| Dietary risks                              | Stroke                                  | 11.5% (8–15.7%)    | 134.1 (87.3–191.2)  | -27.7% (-46.7 to -9.4%)  | 10.3% (7.4–13.9%)  | 6.3 (4.2–8.9)    | -21.3% (-43.9 to 3.6%)   |
|                                            | Ischaemic stroke                        | 14% (9.5–17.9%)    | 92.9 (59.2–126.4)   | -14.2% (-36.9 to 7.6%)   | 12.3% (8.7–15.6%)  | 4.7 (3.1–6.5)    | -9.3% (-37.5 to 21.1%)   |
|                                            | Intracerebral haemorrhage               | 7.9% (3.6–13.2%)   | 31.7 (13.6–56.8)    | -46.7% (-66.1 to -28.6%) | 6.8% (3–11.4%)     | 1.3 (0.5–2.2)    | -43.2% (-63.8 to -22.6%) |
| Environmental/occupational risk factors§   | Subarachnoid haemorrhage                | 9.3% (4.3–14.9%)   | 9.4 (4.2–16.1)      | -46.6% (-67.6 to -8.5%)  | 7.7% (3.5–12.8%)   | 0.3 (0.1–0.5)    | -47.8% (-70.1 to -0.1%)  |
|                                            | Meningitis                              | 0.2% (0.1–0.5%)    | 0.1 (0–0.1)         | -93.8% (-98.2 to -78.9%) | 0.2% (0.1–0.3%)    | <0.1 (<0.1–<0.1) | -93.8% (-98.2 to -78.9%) |
|                                            | Encephalitis                            | 0.1% (0–0.3%)      | <0.1 (<0.1–0.1)     | -58.4% (-91.2 to 62.5%)  | 0.1% (0–0.2%)      | <0.1 (<0.1–<0.1) | -58.4% (-91.2 to 62.3%)  |
| High body-mass index                       | Stroke                                  | 29.2% (25.5–33%)   | 339.7 (267.7–424.6) | -31.5% (-50.3 to -12.7%) | 27.9% (24.4–31.5%) | 16.9 (12.9–21.3) | -24.8% (-46.8 to -2.8%)  |
|                                            | Ischaemic stroke                        | 27.3% (23.8–31%)   | 181.3 (143.8–226.3) | -17.5% (-41.4 to 5.3%)   | 26.7% (23.2–30.2%) | 10.2 (7.8–13.1)  | -12.1% (-38.8 to 16%)    |
|                                            | Intracerebral haemorrhage               | 31.4% (27.4–35.3%) | 125.4 (96.3–159)    | -42.3% (-59.5 to -24.6%) | 29.7% (26–33.7%)   | 5.6 (4.2–7)      | -37.2% (-55.3 to -16.9%) |
|                                            | Subarachnoid haemorrhage                | 32.8% (28.6–36.9%) | 33.1 (24.7–42.3)    | -43.9% (-64.9 to -3.1%)  | 31.3% (27.4–35.2%) | 1.1 (0.8–1.5)    | -43.6% (-66.7 to 10.1%)  |
|                                            | Stroke                                  | 35.5% (24.6–44.9%) | 413 (275.9–564.1)   | -11% (-35.2 to 14.4%)    | 23.3% (14.8–32%)   | 14.1 (8.6–20.7)  | -4.3% (-33.3 to 28.6%)   |
|                                            | Ischaemic stroke                        | 26.4% (17.2–35.7%) | 175 (110.8–248.9)   | 13.2% (-18.4 to 47.4%)   | 16.8% (9.4–25.4%)  | 6.4 (3.4–10.2)   | 22.3% (-21.2 to 70.3%)   |
|                                            | Intracerebral haemorrhage               | 45.9% (32.1–57.8%) | 183.2 (122.8–258.2) | -22.8% (-46.6 to 1.9%)   | 33.2% (21.9–45%)   | 6.2 (3.9–9.2)    | -17.9% (-43.6 to 12.6%)  |
|                                            | Subarachnoid haemorrhage                | 54.3% (40.3–65.6%) | 54.8 (37.2–75)      | -23.9% (-51.7 to 27.3%)  | 41.1% (28.5–52.8%) | 1.5 (1–2.2)      | -23.4% (-54.2 to 41%)    |
|                                            | Neurological disorders*                 | 5.8% (1.8–13%)     | 84.4 (23.5–206.2)   | 36.6% (11.8 to 80.2%)    | 14.4% (4.9–27.6%)  | 5.3 (0.9–15.7)   | 35.2% (5.3 to 85.2%)     |
|                                            | Alzheimer's disease and other dementias | 21.3% (9–37.4%)    | 84.4 (23.5–206.2)   | 36.6% (11.8 to 80.2%)    | 20.6% (8.6–36.4%)  | 5.3 (0.9–15.7)   | 35.2% (5.3 to 85.2%)     |
| High fasting plasma glucose                | Stroke                                  | 22.2% (13.7–36%)   | 259 (153.1–425.8)   | 25.4% (-15.5 to 76.3%)   | 23.8% (13.3–44.4%) | 14.4 (7.7–26.7)  | 37.4% (-10.7 to 99.2%)   |
|                                            | Ischaemic stroke                        | 24.1% (12–47.1%)   | 159.8 (77–316.1)    | 47.5% (-2.2 to 108.7%)   | 24.7% (10.9–56%)   | 9.5 (4.1–21.8)   | 57.7% (-0.7 to 132.5%)   |
|                                            | Intracerebral haemorrhage               | 20.6% (12.7–31.1%) | 82.1 (48.4–126.5)   | 3.3% (-32.2 to 50.2%)    | 22.5% (13–37.5%)   | 4.2 (2.3–7.1)    | 13.3% (-27 to 65.6%)     |
|                                            | Subarachnoid haemorrhage                | 17% (11–24.6%)     | 17.1 (10.4–25.8)    | -8.4% (-45.5 to 75.1%)   | 20.6% (12.5–32.6%) | 0.7 (0.4–1.3)    | -4.4% (-46 to 102.7%)    |
|                                            | Neurological disorders*                 | 2.9% (0.5–8.1%)    | 42.2 (7.2–138.5)    | 39% (19.8 to 68.1%)      | 7.4% (1.4–17.7%)   | 2.7 (0.3–10.3)   | 38.1% (12.9 to 74.1%)    |
|                                            | Alzheimer's disease and other dementias | 10.6% (2.5–22.5%)  | 42.2 (7.2–138.5)    | 39% (19.8 to 68.1%)      | 10.5% (2.5–22.4%)  | 2.7 (0.3–10.3)   | 38.1% (12.9 to 74.1%)    |
| High LDL cholesterol                       | Stroke                                  | 11.5% (5.9–20.8%)  | 133.3 (65.4–251.6)  | -18.9% (-41.5 to 0.4%)   | 10.9% (3.2–24.3%)  | 6.6 (1.8–15.8)   | -13.7% (-43.1 to 12.3%)  |
|                                            | Ischaemic stroke                        | 20.1% (10.3–36.3%) | 133.3 (65.4–251.6)  | -18.9% (-41.5 to 0.4%)   | 17.3% (5.1–38.5%)  | 6.6 (1.8–15.8)   | -13.7% (-43.1 to 12.3%)  |
| High systolic blood pressure               | Stroke                                  | 52.8% (44.6–60.5%) | 614.5 (476.4–763.7) | -23.9% (-44.4 to -4.9%)  | 49.2% (39.7–58.8%) | 29.8 (22–38.6)   | -19.5% (-41.7 to 3.7%)   |
|                                            | Ischaemic stroke                        | 49.3% (39–59.2%)   | 326.8 (242–422.3)   | -9.9% (-35.1 to 13.2%)   | 45.3% (33.1–58.2%) | 17.4 (11.9–24.2) | -6.5% (-35.9 to 23.6%)   |
|                                            | Intracerebral haemorrhage               | 57.6% (47.1–66.9%) | 230 (169.7–294.6)   | -34.9% (-54.7 to -15.5%) | 55.5% (42.6–67.3%) | 10.4 (7.4–13.6)  | -31.4% (-51.7 to -9.9%)  |

**Table S16** Regional and national disabilities and deaths related to neurological conditions attributable to risk factors in North Africa and Middle East countries

| Location<br>Risk factor (alphabetic order) | Cause                     | DALYs (95% UI)     |                      |                          | Deaths (95% UI)    |                  |                          |
|--------------------------------------------|---------------------------|--------------------|----------------------|--------------------------|--------------------|------------------|--------------------------|
|                                            |                           | PAF (%)            | Rate per 100,000     | Rate change (%)          | PAF (%)            | Rate per 100,000 | Rate change (%)          |
|                                            |                           | 2019               | 2019                 | From 1990 to 2019        | 2019               | 2019             | From 1990 to 2019        |
| High temperature                           | Subarachnoid haemorrhage  | 57.1% (47.3–66.2%) | 57.7 (42.9–74)       | -37% (-61 to 13%)        | 56.6% (45.3–66.6%) | 2 (1.4–2.7)      | -38.5% (-64.4 to 23.1%)  |
|                                            | Stroke                    | 0% (-0.1–0.1%)     | 0.3 (-0.9–1.7)       | 34.5% (-322.8 to 234.2%) | 0% (-0.1–0.2%)     | 0 (-0.1–0.1)     | 51.1% (-363.7 to 270.1%) |
|                                            | Ischaemic stroke          | 0% (-0.1–0.1%)     | 0.2 (-0.5–0.9)       | 66.1% (-372.1 to 305.7%) | 0% (-0.1–0.2%)     | <0.1 (<0.1–0.1)  | 74.8% (-397 to 325%)     |
| Household air pollution from solid fuels   | Intracerebral haemorrhage | 0% (-0.1–0.2%)     | 0.1 (-0.4–0.6)       | 13.2% (-290.7 to 168.5%) | 0% (-0.1–0.2%)     | <0.1 (<0.1–<0.1) | 27% (-331.4 to 211.1%)   |
|                                            | Subarachnoid haemorrhage  | 0% (-0.1–0.1%)     | 0 (-0.1–0.1)         | 0.9% (-292.1 to 200.3%)  | 0% (-0.1–0.2%)     | <0.1 (<0.1–<0.1) | 4.3% (-320.5 to 210.4%)  |
|                                            | Meningitis                | 0% (0–0%)          | <0.1 (<0.1–<0.1)     | -99.8% (-100 to -99.4%)  | 0% (0–0%)          | <0.1 (<0.1–<0.1) | -99.8% (-100 to -99.4%)  |
|                                            | Encephalitis              | 0% (0–0%)          | <0.1 (<0.1–<0.1)     | -99% (-99.8 to -95.4%)   | 0% (0–0%)          | <0.1 (<0.1–<0.1) | -99% (-99.8 to -95.4%)   |
|                                            | Stroke                    | 0.1% (0–0.3%)      | 1.4 (0.4–3.6)        | -98.4% (-99.4 to -96.1%) | 0.1% (0–0.2%)      | 0.1 (0–0.2)      | -98.3% (-99.4 to -95.8%) |
|                                            | Ischaemic stroke          | 0.1% (0–0.3%)      | 0.7 (0.2–1.9)        | -98.1% (-99.3 to -95.3%) | 0.1% (0–0.2%)      | <0.1 (<0.1–0.1)  | -98% (-99.3 to -95%)     |
| Kidney dysfunction                         | Intracerebral haemorrhage | 0.1% (0–0.3%)      | 0.5 (0.2–1.3)        | -98.7% (-99.5 to -96.6%) | 0.1% (0–0.3%)      | <0.1 (<0.1–0.1)  | -98.6% (-99.5 to -96.4%) |
|                                            | Subarachnoid haemorrhage  | 0.1% (0–0.3%)      | 0.1 (0–0.4)          | -98.7% (-99.6 to -96.6%) | 0.1% (0–0.3%)      | <0.1 (<0.1–<0.1) | -98.7% (-99.6 to -96.3%) |
|                                            | Stroke                    | 10.5% (8–12.8%)    | 121.6 (86.7–160.1)   | 18.5% (-14.6 to 52%)     | 10% (6.4–13.4%)    | 6.1 (3.7–8.7)    | 27.6% (-13.1 to 68.5%)   |
|                                            | Ischaemic stroke          | 11.9% (8–15.6%)    | 79.2 (51.6–110.4)    | 35.2% (-3.4 to 72.9%)    | 10.1% (4.9–14.9%)  | 3.9 (1.8–6.1)    | 41.3% (-9.8 to 94%)      |
| Lead exposure                              | Intracerebral haemorrhage | 10.6% (8.4–12.9%)  | 42.4 (30.7–56.5)     | -3.6% (-31.2 to 27.6%)   | 11.9% (8.6–15%)    | 2.2 (1.5–3.1)    | 9.1% (-23.4 to 46.3%)    |
|                                            | Stroke                    | 1.9% (0.5–3.7%)    | 22.7 (5.5–45.3)      | -44.4% (-64.6 to -27.8%) | 2.2% (0.7–3.9%)    | 1.3 (0.4–2.5)    | -31.3% (-53.6 to -11.7%) |
|                                            | Ischaemic stroke          | 2% (0.6–3.7%)      | 13 (3.6–25.4)        | -28.5% (-54.5 to -7.9%)  | 2.1% (0.7–3.9%)    | 0.8 (0.3–1.6)    | -15.1% (-45 to 12.5%)    |
| Low birth weight                           | Intracerebral haemorrhage | 2% (0.4–4.1%)      | 8 (1.5–17.2)         | -55.8% (-75.2 to -38.3%) | 2.3% (0.6–4.5%)    | 0.4 (0.1–0.9)    | -45.4% (-65.1 to -27.6%) |
|                                            | Subarachnoid haemorrhage  | 1.6% (0.2–3.8%)    | 1.7 (0.2–3.9)        | -62.6% (-83.9 to -35.4%) | 2.1% (0.5–4.2%)    | 0.1 (0–0.2)      | -55.3% (-77.3 to -13.2%) |
|                                            | Meningitis                | 1.8% (1.2–2.9%)    | 0.5 (0.3–0.8)        | -93.7% (-97 to -86.9%)   | 1.1% (0.7–1.8%)    | <0.1 (<0.1–<0.1) | -93.7% (-97 to -86.9%)   |
|                                            | Encephalitis              | 0.8% (0.4–1.8%)    | 0.2 (0.1–0.3)        | -59.3% (-84.5 to -8.7%)  | 0.6% (0.3–1.2%)    | <0.1 (<0.1–<0.1) | -59.3% (-84.5 to -8.7%)  |
| Low birth weight and short gestation       | Meningitis                | 2% (1.3–3.2%)      | 0.5 (0.3–0.8)        | -93.5% (-96.9 to -86.5%) | 1.2% (0.7–1.9%)    | <0.1 (<0.1–<0.1) | -93.5% (-96.9 to -86.5%) |
|                                            | Encephalitis              | 0.9% (0.4–2%)      | 0.2 (0.1–0.3)        | -57.9% (-83.7 to -4.3%)  | 0.6% (0.3–1.3%)    | <0.1 (<0.1–<0.1) | -57.9% (-83.7 to -4.3%)  |
| Low physical activity                      | Stroke                    | 4% (0.8–9.1%)      | 46.4 (9.1–110.3)     | 6.1% (-24 to 42.7%)      | 5.2% (1.1–11.4%)   | 3.2 (0.7–7)      | 8.4% (-23.7 to 50.9%)    |
|                                            | Ischaemic stroke          | 7% (1.4–16%)       | 46.4 (9.1–110.3)     | 6.1% (-24 to 42.7%)      | 8.3% (1.8–18%)     | 3.2 (0.7–7)      | 8.4% (-23.7 to 50.9%)    |
| Low temperature                            | Stroke                    | 9.2% (6.6–11.7%)   | 106.6 (72.6–145.2)   | -30.8% (-50.9 to -11.1%) | 11% (8–14.1%)      | 6.7 (4.6–9)      | -22% (-43.7 to 0.1%)     |
|                                            | Ischaemic stroke          | 8.6% (6.1–10.9%)   | 56.7 (38.7–78.1)     | -14.7% (-42.8 to 12.4%)  | 11% (8–14.1%)      | 4.2 (2.9–5.7)    | -10% (-38 to 18.7%)      |
|                                            | Intracerebral haemorrhage | 10% (7.2–12.8%)    | 40.1 (26.9–54.9)     | -42.4% (-59.3 to -24.8%) | 11% (8–14.1%)      | 2.1 (1.4–2.8)    | -35.1% (-53.2 to -14.7%) |
|                                            | Subarachnoid haemorrhage  | 9.7% (7–12.5%)     | 9.8 (6.5–13.7)       | -45.5% (-66.6 to 0.7%)   | 11% (8–14.1%)      | 0.4 (0.3–0.6)    | -43% (-66.4 to 12.1%)    |
| Metabolic risk factors†                    | Stroke                    | 72.8% (65.6–79.5%) | 846.7 (678.8–1036.9) | -17.8% (-39.2 to 2.7%)   | 68.9% (59.5–78.5%) | 41.8 (32.3–52.6) | -12.1% (-36 to 13.5%)    |
|                                            | Ischaemic stroke          | 72.1% (62.5–82.5%) | 478.1 (378.6–595.3)  | -3.9% (-30.1 to 20.2%)   | 67.5% (54.6–82.9%) | 25.8 (19.2–34.3) | 0.8% (-29.9 to 33.4%)    |
|                                            | Intracerebral haemorrhage | 74.3% (66.3–80.8%) | 296.4 (233.9–366.2)  | -30.1% (-50.8 to -9.8%)  | 71.8% (62–80.3%)   | 13.4 (10.2–16.9) | -25.6% (-46.6 to -2.2%)  |
|                                            | Subarachnoid haemorrhage  | 71.5% (62.7–78.6%) | 72.2 (55.1–90.8)     | -33.2% (-57.9 to 17.7%)  | 69.7% (60.3–77.9%) | 2.5 (1.8–3.2)    | -34.6% (-61.8 to 28.8%)  |
|                                            | Neurological disorders*   | 8% (2.8–17%)       | 117.6 (36.1–290.4)   | 34.5% (13.2 to 67.1%)    | 20.2% (7.6–34.8%)  | 7.5 (1.4–22.2)   | 33.2% (6.8 to 73.9%)     |

**Table S16** Regional and national disabilities and deaths related to neurological conditions attributable to risk factors in North Africa and Middle East countries

| Location<br>Risk factor (alphabetic order) | Cause                                   | DALYs (95% UI)       |                     |                          | Deaths (95% UI)     |                  |                          |
|--------------------------------------------|-----------------------------------------|----------------------|---------------------|--------------------------|---------------------|------------------|--------------------------|
|                                            |                                         | PAF (%)              | Rate per 100,000    | Rate change (%)          | PAF (%)             | Rate per 100,000 | Rate change (%)          |
|                                            |                                         | 2019                 | 2019                | From 1990 to 2019        | 2019                | 2019             | From 1990 to 2019        |
|                                            | Alzheimer's disease and other dementias | 29.6% (15.2–46.8%)   | 117.6 (36.1–290.4)  | 34.5% (13.2 to 67.1%)    | 28.9% (14.5–46.1%)  | 7.5 (1.4–22.2)   | 33.2% (6.8 to 73.9%)     |
| Non-optimal temperature                    | Stroke                                  | 9.2% (6.6–11.7%)     | 106.9 (73.3–145.7)  | -30.7% (-51 to -11%)     | 11% (8–14.1%)       | 6.7 (4.6–9)      | -21.9% (-43.7 to 0.1%)   |
|                                            | Ischaemic stroke                        | 8.6% (6.2–10.9%)     | 56.9 (39.2–78.1)    | -14.6% (-42.9 to 12.4%)  | 11% (8–14.1%)       | 4.2 (2.9–5.7)    | -9.9% (-38 to 18.7%)     |
|                                            | Intracerebral haemorrhage               | 10.1% (7.2–12.8%)    | 40.2 (27–54.9)      | -42.4% (-59.2 to -24.7%) | 11% (8–14.1%)       | 2.1 (1.4–2.8)    | -35% (-53.2 to -14.8%)   |
|                                            | Subarachnoid haemorrhage                | 9.8% (7–12.5%)       | 9.9 (6.5–13.7)      | -45.5% (-66.6 to 0.9%)   | 11% (8–14.1%)       | 0.4 (0.3–0.6)    | -42.9% (-66.2 to 12.4%)  |
| Other environmental risks                  | Stroke                                  | 1.9% (0.5–3.7%)      | 22.7 (5.5–45.3)     | -44.4% (-64.6 to -27.8%) | 2.2% (0.7–3.9%)     | 1.3 (0.4–2.5)    | -31.3% (-53.6 to -11.7%) |
|                                            | Ischaemic stroke                        | 2% (0.6–3.7%)        | 13 (3.6–25.4)       | -28.5% (-54.5 to -7.9%)  | 2.1% (0.7–3.9%)     | 0.8 (0.3–1.6)    | -15.1% (-45 to 12.5%)    |
|                                            | Intracerebral haemorrhage               | 2% (0.4–4.1%)        | 8 (1.5–17.2)        | -55.8% (-75.2 to -38.3%) | 2.3% (0.6–4.5%)     | 0.4 (0.1–0.9)    | -45.4% (-65.1 to -27.6%) |
|                                            | Subarachnoid haemorrhage                | 1.6% (0.2–3.8%)      | 1.7 (0.2–3.9)       | -62.6% (-83.9 to -35.4%) | 2.1% (0.5–4.2%)     | 0.1 (0–0.2)      | -55.3% (-77.3 to -13.2%) |
| Particulate matter pollution               | Meningitis                              | 0.2% (0.1–0.5%)      | 0.1 (0–0.1)         | -93.8% (-98.2 to -78.9%) | 0.2% (0.1–0.3%)     | <0.1 (<0.1–<0.1) | -93.8% (-98.2 to -78.9%) |
|                                            | Encephalitis                            | 0.1% (0–0.3%)        | <0.1 (<0.1–0.1)     | -58.4% (-91.2 to 62.5%)  | 0.1% (0–0.2%)       | <0.1 (<0.1–<0.1) | -58.4% (-91.2 to 62.3%)  |
|                                            | Stroke                                  | 20.4% (17.2–23.8%)   | 237.9 (183.1–302.9) | -31.9% (-50.9 to -12.3%) | 17.1% (14.3–20.1%)  | 10.4 (7.7–13.6)  | -27.2% (-48.3 to -4.6%)  |
|                                            | Ischaemic stroke                        | 18.9% (15.8–22.1%)   | 125.1 (95.5–157.4)  | -18.8% (-41.8 to 3.5%)   | 15.8% (13.1–18.7%)  | 6.1 (4.5–7.9)    | -14.7% (-41.6 to 15%)    |
|                                            | Intracerebral haemorrhage               | 22.1% (18.7–25.7%)   | 88.3 (66.8–114.8)   | -42% (-59.6 to -23.1%)   | 19.1% (16–22.3%)    | 3.6 (2.6–4.6)    | -38.6% (-57.5 to -17.3%) |
|                                            | Subarachnoid haemorrhage                | 24.2% (20.6–27.9%)   | 24.4 (17.9–32.5)    | -42.6% (-63.8 to -2.7%)  | 21.1% (17.9–24.4%)  | 0.8 (0.6–1)      | -43.7% (-66.9 to 7.8%)   |
| Secondhand smoke                           | Stroke                                  | 3.5% (2.6–4.4%)      | 40.8 (29–54.9)      | -46.4% (-60 to -30.8%)   | 3.1% (2.3–3.9%)     | 1.9 (1.3–2.5)    | -43.8% (-59.5 to -26.2%) |
|                                            | Ischaemic stroke                        | 3.1% (2.3–3.9%)      | 20.4 (14.4–27.4)    | -36.7% (-54.5 to -18.2%) | 2.8% (2–3.6%)       | 1.1 (0.7–1.5)    | -35.3% (-55.3 to -12%)   |
|                                            | Intracerebral haemorrhage               | 4% (2.9–5%)          | 15.9 (11.1–22)      | -53.2% (-66.4 to -38.5%) | 3.5% (2.6–4.4%)     | 0.6 (0.4–0.9)    | -51.5% (-64.7 to -35.1%) |
|                                            | Subarachnoid haemorrhage                | 4.5% (3.4–5.8%)      | 4.5 (3.2–6.3)       | -54.4% (-70.7 to -21.8%) | 4% (3–5%)           | 0.1 (0.1–0.2)    | -55.6% (-73.2 to -15.2%) |
| Short gestation                            | Meningitis                              | 1.5% (0.9–2.4%)      | 0.4 (0.2–0.6)       | -92.2% (-96.3 to -83.8%) | 0.9% (0.6–1.4%)     | <0.1 (<0.1–<0.1) | -92.2% (-96.3 to -83.8%) |
|                                            | Encephalitis                            | 0.7% (0.3–1.4%)      | 0.1 (0.1–0.3)       | -49.7% (-80.9 to 13.9%)  | 0.5% (0.2–1%)       | <0.1 (<0.1–<0.1) | -49.7% (-80.9 to 13.9%)  |
| Smoking                                    | Stroke                                  | 18.5% (16.9–20.2%)   | 215.4 (175.1–260.6) | -40.3% (-59 to -21.3%)   | 12.3% (10.9–13.7%)  | 7.4 (5.9–9.2)    | -39.8% (-59.9 to -18.7%) |
|                                            | Ischaemic stroke                        | 15.1% (13.6–16.6%)   | 99.9 (81.9–121.4)   | -30.2% (-53.1 to -9.4%)  | 9.6% (8.4–10.9%)    | 3.7 (2.9–4.6)    | -30.2% (-57 to -3%)      |
|                                            | Intracerebral haemorrhage               | 22.4% (20.4–24.4%)   | 89.4 (71.3–111.1)   | -47.7% (-66.1 to -29.1%) | 16.2% (14.4–18.1%)  | 3 (2.4–3.8)      | -47% (-66 to -27.6%)     |
|                                            | Subarachnoid haemorrhage                | 25.9% (23.3–28.6%)   | 26.1 (19.8–33.1)    | -43.6% (-66 to -0.9%)    | 20.2% (17.9–22.7%)  | 0.7 (0.5–0.9)    | -46.1% (-69.1 to 3.6%)   |
|                                            | Neurological disorders*                 | 4% (1.5–8.3%)        | 59.2 (20.2–143.6)   | -21.3% (-35.1 to -0.3%)  | 7.9% (2.2–13.5%)    | 3 (0.4–9)        | -24.2% (-41.7 to 12.7%)  |
|                                            | Alzheimer's disease and other dementias | 16.2% (10.5–21.7%)   | 64.1 (24.9–147.8)   | -24.6% (-37.9 to -8.4%)  | 13.2% (8.4–18%)     | 3.4 (0.7–9.4)    | -27% (-42.2 to -7.3%)    |
|                                            | Parkinson's disease                     | -10.9% (-16.6–-5.3%) | -8.2 (-13.7–-4)     | -41.9% (-57.4 to -21.5%) | -8.8% (-13.6–-4.2%) | -0.4 (-0.7–-0.2) | -43% (-59.6 to -20.1%)   |
|                                            | Multiple sclerosis                      | 15.5% (10.5–19.8%)   | 3.2 (2.3–4.4)       | -24.4% (-44.7 to -3.9%)  | 15.4% (10.2–19.8%)  | <0.1 (<0.1–0.1)  | -37.5% (-63.3 to -4.9%)  |
| Tobacco                                    | Stroke                                  | 21.3% (19.6–23%)     | 247.4 (201.1–298)   | -40.6% (-58.4 to -23.1%) | 14.9% (13.4–16.5%)  | 9 (7.1–11.2)     | -40% (-58.8 to -20.2%)   |
|                                            | Ischaemic stroke                        | 17.6% (16–19.2%)     | 116.7 (95.1–141.2)  | -30.7% (-52.7 to -10.7%) | 12% (10.7–13.5%)    | 4.6 (3.6–5.8)    | -30.8% (-56.1 to -5.5%)  |

**Table S16** Regional and national disabilities and deaths related to neurological conditions attributable to risk factors in North Africa and Middle East countries

| Location<br>Risk factor (alphabetic order) | Cause                                   | DALYs (95% UI)       |                        |                            | Deaths (95% UI)          |                   |                            |
|--------------------------------------------|-----------------------------------------|----------------------|------------------------|----------------------------|--------------------------|-------------------|----------------------------|
|                                            |                                         | PAF (%)              | Rate per 100,000       | Rate change (%)            | PAF (%)                  | Rate per 100,000  | Rate change (%)            |
|                                            |                                         | 2019                 | 2019                   | From 1990 to 2019          | 2019                     | 2019              | From 1990 to 2019          |
|                                            | Intracerebral haemorrhage               | 25.4% (23.2–27.5%)   | 101.3 (81.1–125.6)     | -48.1% (-65.2 to -30.6%)   | 19% (17.1–21%)           | 3.6 (2.8–4.5)     | -47.3% (-65 to -29%)       |
|                                            | Subarachnoid haemorrhage                | 29.1% (26.4–31.6%)   | 29.4 (22.5–37.2)       | -44.8% (-66 to -2.9%)      | 23.3% (20.8–25.7%)       | 0.8 (0.6–1.1)     | -47.3% (-69.2 to 3%)       |
|                                            | Neurological disorders*                 | 4% (1.5–8.3%)        | 59.2 (20.2–143.6)      | -21.3% (-35.1 to -0.3%)    | 7.9% (2.2–13.5%)         | 3 (0.4–9)         | -24.2% (-41.7 to 12.7%)    |
|                                            | Alzheimer's disease and other dementias | 16.2% (10.5–21.7%)   | 64.1 (24.9–147.8)      | -24.6% (-37.9 to -8.4%)    | 13.2% (8.4–18%)          | 3.4 (0.7–9.4)     | -27% (-42.2 to -7.3%)      |
|                                            | Parkinson's disease                     | -10.9% (-16.6–-5.3%) | -8.2 (-13.7–-4)        | -41.9% (-57.4 to -21.5%)   | -8.8% (-13.6–-4.2%)      | -0.4 (-0.7–-0.2)  | -43% (-59.6 to -20.1%)     |
|                                            | Multiple sclerosis                      | 15.5% (10.5–19.8%)   | 3.2 (2.3–4.4)          | -24.4% (-44.7 to -3.9%)    | 15.4% (10.2–19.8%)       | <0.1 (<0.1–0.1)   | -37.5% (-63.3 to -4.9%)    |
| <b>United Arab Emirates</b>                |                                         |                      |                        |                            |                          |                   |                            |
| Air pollution                              | Meningitis                              | 0.3% (0.1–0.7%)      | 0.1 (0–0.2)            | -92.7% (-97.6 to -80.6%)   | 0.1% (0–0.3%)            | <0.1 (<0.1–<0.1)  | -92.7% (-97.6 to -80.6%)   |
|                                            | Encephalitis                            | 0.4% (0.1–0.9%)      | 0.1 (0–0.1)            | -32.4% (-81.4 to 130.9%)   | 0.2% (0.1–0.5%)          | <0.1 (<0.1–<0.1)  | -32.4% (-81.4 to 130.9%)   |
|                                            | Stroke                                  | 30.2% (24.4–35.7%)   | 581.5 (421.7–780.4)    | -44.3% (-58.2 to -26.9%)   | 25.8% (20.7–30.8%)       | 23.5 (16.3–32.9)  | -49.9% (-62.5 to -34%)     |
|                                            | Ischaemic stroke                        | 29% (23.5–34.4%)     | 410.8 (301.2–545.8)    | -31.2% (-47.6 to -11.2%)   | 24.7% (19.8–29.9%)       | 17.7 (12.4–24.3)  | -40.1% (-55.3 to -21.3%)   |
|                                            | Intracerebral haemorrhage               | 33.4% (27.3–39.7%)   | 150.4 (99.8–226)       | -62.4% (-74.7 to -45.6%)   | 29.4% (23.7–35.2%)       | 5.3 (3.4–8.1)     | -66.8% (-77.6 to -51.9%)   |
|                                            | Subarachnoid haemorrhage                | 33.4% (27.3–39.6%)   | 20.3 (10.5–33.7)       | -58% (-74.3 to -30.2%)     | 30.2% (24.5–35.8%)       | 0.6 (0.3–1)       | -63.3% (-78.2 to -38.3%)   |
| Alcohol use                                | Stroke                                  | 0.6% (-0.3–1.6%)     | 12.1 (-4.9–31.8)       | -87.6% (-108.7 to -68.6%)  | 0.3% (-0.4–1.1%)         | 0.3 (-0.4–1)      | -91.6% (-119.8 to -72.4%)  |
|                                            | Ischaemic stroke                        | -0.2% (-1.1–0.8%)    | -2.1 (-15.5–11.3)      | -113.7% (-565.9 to 320.1%) | -0.2% (-0.9–0.6%)        | -0.2 (-0.7–0.4)   | -132.1% (-780.5 to 666.6%) |
|                                            | Intracerebral haemorrhage               | 3.2% (1.1–5.5%)      | 14.3 (4.6–27.9)        | -82.7% (-93.1 to -66.8%)   | 2.4% (0.8–4.4%)          | 0.4 (0.1–0.9)     | -84.8% (-94.4 to -70.5%)   |
|                                            | Neurological disorders*                 | 0.7% (0.3–1.3%)      | 9 (3.5–17.3)           | -60.4% (-84 to -12.8%)     | 0.2% (0.1–0.6%)          | 0.1 (0–0.1)       | -58% (-78 to -28.7%)       |
|                                            | Idiopathic epilepsy                     | 4.2% (2.3–6.5%)      | 9 (3.5–17.3)           | -60.4% (-84 to -12.8%)     | 5.4% (3–8.1%)            | 0.1 (0–0.1)       | -58% (-78 to -28.7%)       |
|                                            | All risk factors                        | Meningitis           | 1.4% (0.7–3.5%)        | 0.4 (0.2–1.1)              | -92.9% (-96.5 to -85.7%) | 0.6% (0.3–1.8%)   | <0.1 (<0.1–<0.1)           |
| Encephalitis                               |                                         | 2.2% (1–4.1%)        | 0.4 (0.2–0.7)          | -35.1% (-75.7 to 68.2%)    | 1.3% (0.6–2.6%)          | <0.1 (<0.1–<0.1)  | -35.1% (-75.7 to 68.2%)    |
| Stroke                                     |                                         | 89.3% (85.6–92.7%)   | 1719.6 (1350.3–2192.7) | -45.5% (-58.5 to -29.9%)   | 86.8% (80.9–92.3%)       | 79.2 (59.8–103.4) | -50.2% (-62.3 to -35.4%)   |
| Ischaemic stroke                           |                                         | 89.3% (84.8–93.6%)   | 1263.3 (996.8–1560.3)  | -33.7% (-48.9 to -15.3%)   | 86.5% (79.5–93.2%)       | 61.8 (46.4–78.8)  | -41.3% (-55.2 to -23.6%)   |
| Intracerebral haemorrhage                  |                                         | 89.8% (86.5–92.8%)   | 404.6 (285.2–600.7)    | -63.9% (-75.5 to -48.2%)   | 87.9% (83–92.2%)         | 15.7 (10.8–23.9)  | -68% (-77.9 to -54.3%)     |
| Subarachnoid haemorrhage                   |                                         | 84.9% (79.3–89.7%)   | 51.7 (27–84.3)         | -60% (-75.2 to -34.6%)     | 85.1% (79.8–90.2%)       | 1.7 (0.7–2.8)     | -64.4% (-78.2 to -41.1%)   |
| Neurological disorders*                    |                                         | 12.8% (5.2–25.7%)    | 183.1 (70.9–453)       | 11.9% (-10 to 39.7%)       | 28.7% (11–48.3%)         | 11.2 (2.1–33.5)   | 24.1% (-1.3 to 69.8%)      |
| Alzheimer's disease and other dementias    |                                         | 49.4% (32.3–66.4%)   | 181.3 (68.3–451.6)     | 22.5% (2.5 to 52.5%)       | 47.9% (30.7–65.1%)       | 11.6 (2.5–34)     | 24.4% (-0.3 to 73%)        |
| Parkinson's disease                        |                                         | -7.3% (-11.3–-3.7%)  | -9.5 (-15.9–-4.5)      | 1.8% (-31.8 to 50.1%)      | -6.8% (-10.7–-3.5%)      | -0.5 (-0.9–-0.3)  | 1.5% (-33.1 to 51.8%)      |
| Idiopathic epilepsy                        |                                         | 4.2% (2.3–6.5%)      | 9 (3.5–17.3)           | -60.4% (-84 to -12.8%)     | 5.4% (3–8.1%)            | 0.1 (0–0.1)       | -58% (-78 to -28.7%)       |
| Multiple sclerosis                         |                                         | 11.2% (7.7–15.2%)    | 2.3 (1.2–4)            | 7.7% (-31.6 to 58.1%)      | 11.7% (7.2–16%)          | <0.1 (<0.1–0.1)   | 18.7% (-38.3 to 91.2%)     |
| Ambient particulate matter pollution       |                                         | Meningitis           | 0.3% (0.1–0.7%)        | 0.1 (0–0.2)                | -92.6% (-97.6 to -80.4%) | 0.1% (0–0.3%)     | <0.1 (<0.1–<0.1)           |
|                                            | Encephalitis                            | 0.4% (0.1–0.9%)      | 0.1 (0–0.1)            | -31.9% (-81.2 to 132.5%)   | 0.2% (0.1–0.5%)          | <0.1 (<0.1–<0.1)  | -31.9% (-81.2 to 132.5%)   |

**Table S16** Regional and national disabilities and deaths related to neurological conditions attributable to risk factors in North Africa and Middle East countries

| Location<br>Risk factor (alphabetic order) | Cause                                   | DALYs (95% UI)            |                     |                          | Deaths (95% UI)          |                  |                          |                          |
|--------------------------------------------|-----------------------------------------|---------------------------|---------------------|--------------------------|--------------------------|------------------|--------------------------|--------------------------|
|                                            |                                         | PAF (%)                   | Rate per 100,000    | Rate change (%)          | PAF (%)                  | Rate per 100,000 | Rate change (%)          |                          |
|                                            |                                         | 2019                      | 2019                | From 1990 to 2019        | 2019                     | 2019             | From 1990 to 2019        |                          |
| Behavioural risk factors‡                  | Stroke                                  | 30.2% (24.4–35.7%)        | 581.5 (421.7–780.3) | -44% (-58 to -26.5%)     | 25.8% (20.7–30.8%)       | 23.5 (16.3–32.9) | -49.6% (-62.2 to -33.6%) |                          |
|                                            | Ischaemic stroke                        | 29% (23.5–34.4%)          | 410.8 (301.1–545.8) | -30.7% (-47.3 to -10.8%) | 24.7% (19.8–29.9%)       | 17.7 (12.4–24.3) | -39.7% (-54.8 to -20.7%) |                          |
|                                            | Intracerebral haemorrhage               | 33.4% (27.3–39.7%)        | 150.4 (99.8–226)    | -62.2% (-74.5 to -45.2%) | 29.4% (23.7–35.2%)       | 5.3 (3.4–8.1)    | -66.6% (-77.5 to -51.3%) |                          |
|                                            | Subarachnoid haemorrhage                | 33.4% (27.3–39.6%)        | 20.3 (10.5–33.7)    | -57.7% (-74.2 to -30%)   | 30.2% (24.5–35.8%)       | 0.6 (0.3–1)      | -63.1% (-78 to -37.9%)   |                          |
|                                            | Meningitis                              | 1.4% (0.7–3.4%)           | 0.4 (0.2–1.1)       | -92.9% (-96.5 to -85.7%) | 0.6% (0.3–1.7%)          | <0.1 (<0.1–<0.1) | -92.9% (-96.5 to -85.7%) |                          |
|                                            | Encephalitis                            | 2.1% (1.3–9%)             | 0.4 (0.2–0.7)       | -34.6% (-75.4 to 68.7%)  | 1.3% (0.6–2.5%)          | <0.1 (<0.1–<0.1) | -34.6% (-75.4 to 68.7%)  |                          |
|                                            | Stroke                                  | 37.1% (31.1–43.4%)        | 714.2 (518.7–943.5) | -43.2% (-58.1 to -25.4%) | 32.8% (26.3–39.4%)       | 29.9 (21.2–41.1) | -47.3% (-61.3 to -30.1%) |                          |
|                                            | Ischaemic stroke                        | 37.4% (29.6–45.1%)        | 529.5 (384.7–704.1) | -30.6% (-47.9 to -8.3%)  | 33.3% (25.3–41.1%)       | 23.8 (16.5–32.8) | -38.2% (-53.8 to -17.7%) |                          |
|                                            | Intracerebral haemorrhage               | 36.4% (30.3–42.7%)        | 164 (108.5–250.1)   | -63.4% (-76.6 to -44.9%) | 31% (25.4–37.2%)         | 5.6 (3.6–8.8)    | -66.9% (-78.7 to -50.4%) |                          |
|                                            | Subarachnoid haemorrhage                | 33.9% (27.5–40.5%)        | 20.7 (10.2–34.7)    | -57% (-75.3 to -29.3%)   | 29.8% (23.7–36.1%)       | 0.6 (0.2–1)      | -61.4% (-77.6 to -35.1%) |                          |
| Neurological disorders*                    | Neurological disorders*                 | 4.1% (1.6–8.6%)           | 58.7 (20.7–141.8)   | -12.3% (-46.3 to 20.2%)  | 7.8% (1.4–14.9%)         | 3.1 (0.3–10)     | 14.2% (-23.6 to 66.9%)   |                          |
|                                            | Alzheimer's disease and other dementias | 15.5% (9.4–22.5%)         | 56.9 (21–135.5)     | 10.7% (-15.4 to 49%)     | 14.6% (8.8–21.4%)        | 3.5 (0.8–10.4)   | 16.2% (-12.9 to 68.6%)   |                          |
|                                            | Parkinson's disease                     | -7.3% (-11.3–3.7%)        | -9.5 (-15.9–4.5)    | 1.8% (-31.8 to 50.1%)    | -6.8% (-10.7–3.5%)       | -0.5 (-0.9–0.3)  | 1.5% (-33.1 to 51.8%)    |                          |
|                                            | Idiopathic epilepsy                     | 4.2% (2.3–6.5%)           | 9 (3.5–17.3)        | -60.4% (-84 to -12.8%)   | 5.4% (3–8.1%)            | 0.1 (0–0.1)      | -58% (-78 to -28.7%)     |                          |
|                                            | Multiple sclerosis                      | 11.2% (7.7–15.2%)         | 2.3 (1.2–4)         | 7.7% (-31.6 to 58.1%)    | 11.7% (7.2–16%)          | <0.1 (<0.1–0.1)  | 18.7% (-38.3 to 91.2%)   |                          |
|                                            | Child and maternal malnutrition         | Meningitis                | 1.4% (0.7–3.4%)     | 0.4 (0.2–1.1)            | -92.9% (-96.5 to -85.7%) | 0.6% (0.3–1.7%)  | <0.1 (<0.1–<0.1)         | -92.9% (-96.5 to -85.7%) |
|                                            |                                         | Encephalitis              | 2.1% (1.3–9%)       | 0.4 (0.2–0.7)            | -34.6% (-75.4 to 68.7%)  | 1.3% (0.6–2.5%)  | <0.1 (<0.1–<0.1)         | -34.6% (-75.4 to 68.7%)  |
|                                            | Diet high in red meat                   | Stroke                    | 5.8% (2.6–8.3%)     | 112 (49.7–173.2)         | -68.7% (-82.3 to -54%)   | 4.4% (1.8–6.4%)  | 4.1 (1.7–6.4)            | -71.2% (-83.4 to -58.2%) |
|                                            |                                         | Ischaemic stroke          | 5.3% (1.3–7.8%)     | 74.3 (18.3–118.7)        | -59.8% (-82.3 to -40.6%) | 4% (1–5.9%)      | 2.8 (0.7–4.6)            | -63.9% (-82.5 to -46.7%) |
|                                            |                                         | Intracerebral haemorrhage | 7.3% (1.8–11%)      | 33 (7.5–61)              | -78.5% (-91.7 to -64.4%) | 6.1% (1.4–9.3%)  | 1.1 (0.2–2)              | -80.7% (-92 to -68.7%)   |
| Subarachnoid haemorrhage                   |                                         | 7.7% (1.9–11.6%)          | 4.7 (1.1–9.3)       | -76.2% (-90.8 to -57.9%) | 6.4% (1.4–9.8%)          | 0.1 (0–0.3)      | -79% (-91.7 to -62%)     |                          |
| Diet high in sodium                        | Stroke                                  | 2.2% (0.2–8.6%)           | 42.7 (4.5–164.6)    | -44% (-68.5 to 0%)       | 1.8% (0.2–7.3%)          | 1.7 (0.2–6.6)    | -48.6% (-72.3 to -5.5%)  |                          |
|                                            | Ischaemic stroke                        | 2% (0.2–8%)               | 28.7 (3.4–112.3)    | -29.9% (-62.3 to 24.5%)  | 1.7% (0.2–6.7%)          | 1.2 (0.2–4.7)    | -37.2% (-67.3 to 16.1%)  |                          |
|                                            | Intracerebral haemorrhage               | 2.7% (0.2–10.3%)          | 12.4 (1–51.1)       | -60.9% (-79.7 to -25.3%) | 2.4% (0.2–9.5%)          | 0.4 (0–1.8)      | -65.1% (-82.5 to -33.8%) |                          |
|                                            | Subarachnoid haemorrhage                | 2.5% (0.2–9.7%)           | 1.6 (0.1–6.5)       | -56.5% (-79.6 to -8.8%)  | 2.3% (0.2–9.2%)          | <0.1 (<0.1–0.2)  | -61.4% (-82.7 to -19.8%) |                          |
| Diet low in fibre                          | Stroke                                  | 1.6% (0.4–3.5%)           | 31.7 (7–75.3)       | -26.6% (-48.2 to 6.6%)   | 1.5% (0.4–3%)            | 1.3 (0.3–3.1)    | -35.5% (-55.4 to -4.8%)  |                          |
|                                            | Ischaemic stroke                        | 1.6% (0.4–3.3%)           | 22.2 (5–50.8)       | -9.4% (-36.7 to 28.5%)   | 1.4% (0.4–2.9%)          | 1 (0.2–2.3)      | -23.3% (-48.8 to 13.9%)  |                          |
|                                            | Intracerebral haemorrhage               | 1.8% (0.4–3.9%)           | 8.3 (1.7–20.4)      | -49.8% (-68.1 to -20%)   | 1.7% (0.4–3.5%)          | 0.3 (0.1–0.7)    | -56.9% (-72.4 to -32.7%) |                          |
|                                            | Subarachnoid haemorrhage                | 2% (0.4–4.4%)             | 1.2 (0.2–3.2)       | -44.4% (-66.9 to -0.8%)  | 1.8% (0.4–3.8%)          | <0.1 (<0.1–0.1)  | -51.6% (-71 to -15.3%)   |                          |
| Diet low in fruits                         | Stroke                                  | 3.5% (1.5–5.7%)           | 66.8 (27–118.5)     | 55.7% (-13.8 to 151.5%)  | 2.6% (1.1–4.4%)          | 2.4 (1–4.4)      | 33.1% (-22 to 127.9%)    |                          |
|                                            | Ischaemic stroke                        | 2.7% (0.5–5.4%)           | 39 (7.5–80.3)       | 119.5% (5.2 to 268.5%)   | 2.1% (0.4–4.1%)          | 1.5 (0.3–3.2)    | 64.6% (-20.2 to 200.4%)  |                          |
|                                            | Intracerebral haemorrhage               | 5.4% (2.5–9.2%)           | 24.2 (10.5–47.9)    | 11.8% (-33.5 to 120.2%)  | 4.4% (2–7.4%)            | 0.8 (0.3–1.5)    | 0.5% (-42.2 to 97.8%)    |                          |

**Table S16** Regional and national disabilities and deaths related to neurological conditions attributable to risk factors in North Africa and Middle East countries

| Location<br>Risk factor (alphabetic order) | Cause                                   | DALYs (95% UI)     |                      |                           | Deaths (95% UI)    |                  |                          |
|--------------------------------------------|-----------------------------------------|--------------------|----------------------|---------------------------|--------------------|------------------|--------------------------|
|                                            |                                         | PAF (%)            | Rate per 100,000     | Rate change (%)           | PAF (%)            | Rate per 100,000 | Rate change (%)          |
|                                            |                                         | 2019               | 2019                 | From 1990 to 2019         | 2019               | 2019             | From 1990 to 2019        |
| Diet low in vegetables                     | Subarachnoid haemorrhage                | 5.9% (2.7–10.3%)   | 3.6 (1.4–7.7)        | 3.2% (-44.6 to 102%)      | 4.8% (2.2–8.2%)    | 0.1 (0–0.2)      | 0.7% (-47.3 to 108.1%)   |
|                                            | Stroke                                  | 2% (0.5–3.6%)      | 38.3 (9.4–72.7)      | 330.3% (24.2 to 650.5%)   | 1.7% (0.4–3%)      | 1.5 (0.4–2.9)    | 165.3% (-3.6 to 356.5%)  |
|                                            | Ischaemic stroke                        | 1.8% (0.2–3.6%)    | 25.6 (3.2–51.4)      | 351.2% (-26 to 720.6%)    | 1.5% (0.2–2.9%)    | 1.1 (0.2–2.2)    | 171.3% (-34 to 401.6%)   |
|                                            | Intracerebral haemorrhage               | 2.5% (0.2–6.9%)    | 11.2 (0.9–33.3)      | 282.7% (-62.9 to 756.6%)  | 2.3% (0.2–6.1%)    | 0.4 (0–1.1)      | 146% (-66.4 to 396.1%)   |
| Diet low in whole grains                   | Subarachnoid haemorrhage                | 2.5% (0.2–7.1%)    | 1.5 (0.1–4.7)        | 396.2% (-58.5 to 1173.2%) | 2.3% (0.2–6.3%)    | <0.1 (<0.1–0.1)  | 222.5% (-64.6 to 609.5%) |
|                                            | Stroke                                  | 4.5% (1.2–6.5%)    | 85.7 (23.2–133)      | -30.2% (-47.4 to -9.1%)   | 3.9% (1.1–5.6%)    | 3.6 (1–5.6)      | -39.8% (-55.2 to -20.9%) |
|                                            | Ischaemic stroke                        | 6.1% (1.6–8.8%)    | 85.7 (23.2–133)      | -30.2% (-47.4 to -9.1%)   | 5% (1.5–7.2%)      | 3.6 (1–5.6)      | -39.8% (-55.2 to -20.9%) |
| Dietary risks                              | Stroke                                  | 17.8% (12.7–23.5%) | 343.3 (223.8–504.8)  | -43.6% (-60 to -22.9%)    | 14.8% (10.5–19.7%) | 13.5 (8.7–20.1)  | -48.4% (-63.1 to -29.5%) |
|                                            | Ischaemic stroke                        | 17.7% (11.2–23.5%) | 250.1 (154.8–356.3)  | -31.8% (-51.1 to -7.6%)   | 14.6% (9.4–19.5%)  | 10.4 (6.4–15.2)  | -39.6% (-56.8 to -16.6%) |
|                                            | Intracerebral haemorrhage               | 18.1% (10.8–25.7%) | 81.7 (44–140.9)      | -61.9% (-76.7 to -39.6%)  | 15.7% (9.3–22.8%)  | 2.8 (1.5–4.9)    | -65.5% (-78.5 to -44.3%) |
|                                            | Subarachnoid haemorrhage                | 18.8% (11.2–26%)   | 11.5 (5.2–20.1)      | -58.2% (-76 to -27.6%)    | 16.3% (9.8–23.3%)  | 0.3 (0.1–0.6)    | -62.4% (-78.8 to -31.5%) |
| Environmental/occupational risk factors§   | Meningitis                              | 0.3% (0.1–0.7%)    | 0.1 (0–0.2)          | -92.7% (-97.6 to -80.6%)  | 0.1% (0–0.3%)      | <0.1 (<0.1–<0.1) | -92.7% (-97.6 to -80.6%) |
|                                            | Encephalitis                            | 0.4% (0.1–0.9%)    | 0.1 (0–0.1)          | -32.4% (-81.4 to 130.9%)  | 0.2% (0.1–0.5%)    | <0.1 (<0.1–<0.1) | -32.4% (-81.4 to 130.9%) |
|                                            | Stroke                                  | 37.5% (29–45.1%)   | 723.7 (511.4–1004.3) | -45.9% (-60.1 to -27.4%)  | 35.1% (25.6–43.7%) | 32.1 (21.2–45.8) | -49.7% (-63.2 to -31.5%) |
| High body-mass index                       | Ischaemic stroke                        | 36.3% (28–43.6%)   | 514.4 (365–692.6)    | -33% (-50 to -10.3%)      | 34.2% (24.7–42.9%) | 24.5 (16.1–34.8) | -40% (-56.3 to -17.4%)   |
|                                            | Intracerebral haemorrhage               | 41% (31.8–49%)     | 184.7 (120.4–289.9)  | -63.5% (-75.5 to -46%)    | 38.4% (28.8–47.1%) | 6.9 (4.3–11)     | -67.2% (-78.3 to -51.8%) |
|                                            | Subarachnoid haemorrhage                | 40.4% (31.7–48.3%) | 24.6 (12.5–40.8)     | -60.7% (-76.1 to -32.7%)  | 38.9% (29.4–47.6%) | 0.8 (0.3–1.3)    | -64% (-78.5 to -37.1%)   |
|                                            | Stroke                                  | 43% (32.6–51.8%)   | 828.5 (569.3–1144.4) | -28.8% (-48.8 to -0.7%)   | 29.2% (20.5–37.6%) | 26.7 (16.8–39)   | -33.4% (-52.5 to -5.3%)  |
|                                            | Ischaemic stroke                        | 36.9% (26.8–45.7%) | 521.9 (353.7–711.5)  | -0.7% (-27.2 to 35.5%)    | 24.6% (16.4–33.9%) | 17.6 (10.8–26.1) | -10.1% (-37 to 28.8%)    |
|                                            | Intracerebral haemorrhage               | 59.7% (47.7–69.8%) | 269 (178.5–413.1)    | -52.3% (-68.4 to -27.6%)  | 45.5% (33.6–57.3%) | 8.1 (5–13.1)     | -55.9% (-70.9 to -32.6%) |
|                                            | Subarachnoid haemorrhage                | 61.8% (49.6–71.1%) | 37.6 (19.5–61.9)     | -49.4% (-69.6 to -15.3%)  | 48.5% (36.5–59.8%) | 1 (0.4–1.7)      | -54.4% (-73.2 to -19.3%) |
|                                            | Neurological disorders*                 | 6.6% (1.9–14.6%)   | 93.7 (25.6–237.2)    | 44.3% (5.6 to 112.7%)     | 15.4% (4.7–28.6%)  | 5.9 (1–18)       | 45.6% (-0.4 to 130.6%)   |
| High fasting plasma glucose                | Alzheimer's disease and other dementias | 25.5% (11.1–42.2%) | 93.7 (25.6–237.2)    | 44.3% (5.6 to 112.7%)     | 24.5% (10.4–40.8%) | 5.9 (1–18)       | 45.6% (-0.4 to 130.6%)   |
|                                            | Stroke                                  | 30.5% (19.9–45.6%) | 588.3 (353.8–922.6)  | -45.2% (-60.5 to -26%)    | 29.9% (18–50.1%)   | 27.3 (14.6–46.7) | -51.4% (-65.1 to -33.6%) |
|                                            | Ischaemic stroke                        | 31.2% (18.2–51.6%) | 442.3 (244.9–758.6)  | -35.6% (-53.4 to -9.1%)   | 30% (15.8–54.2%)   | 21.4 (10.4–39.6) | -43.9% (-59.6 to -20.5%) |
|                                            | Intracerebral haemorrhage               | 29.1% (19.3–40.8%) | 131.1 (73.7–220.2)   | -62.7% (-75.3 to -42.9%)  | 29.8% (19.4–44.4%) | 5.3 (3–9.2)      | -67.6% (-78.6 to -51.1%) |
|                                            | Subarachnoid haemorrhage                | 24.5% (15.8–34.4%) | 14.9 (6.6–26.9)      | -57.9% (-74.5 to -28%)    | 27.8% (18.3–40.6%) | 0.5 (0.2–1)      | -64% (-78.6 to -37%)     |
|                                            | Neurological disorders*                 | 5% (1–13.4%)       | 71.7 (13–221.6)      | 29.8% (9.7 to 67.1%)      | 12% (2.5–27.9%)    | 4.7 (0.5–16.4)   | 29.3% (5.3 to 81%)       |
| High LDL cholesterol                       | Alzheimer's disease and other dementias | 19.5% (5.2–38.9%)  | 71.7 (13–221.6)      | 29.8% (9.7 to 67.1%)      | 19.2% (5–38.6%)    | 4.7 (0.5–16.4)   | 29.3% (5.3 to 81%)       |
|                                            | Stroke                                  | 21.1% (12.9–34%)   | 403.7 (232.6–670.1)  | -19.7% (-39.3 to 9.6%)    | 18.8% (7.4–36.5%)  | 17.1 (6.6–34.1)  | -31.5% (-48.3 to -4.4%)  |
|                                            | Ischaemic stroke                        | 28.6% (17.4–45.8%) | 403.7 (232.6–670.1)  | -19.7% (-39.3 to 9.6%)    | 24% (9.6–46.7%)    | 17.1 (6.6–34.1)  | -31.5% (-48.3 to -4.4%)  |



**Table S16** Regional and national disabilities and deaths related to neurological conditions attributable to risk factors in North Africa and Middle East countries

| Location<br>Risk factor (alphabetic order) | Cause                     | DALYs (95% UI)     |                       |                          | Deaths (95% UI)    |                  |                          |
|--------------------------------------------|---------------------------|--------------------|-----------------------|--------------------------|--------------------|------------------|--------------------------|
|                                            |                           | PAF (%)            | Rate per 100,000      | Rate change (%)          | PAF (%)            | Rate per 100,000 | Rate change (%)          |
|                                            |                           | 2019               | 2019                  | From 1990 to 2019        | 2019               | 2019             | From 1990 to 2019        |
| High systolic blood pressure               | Stroke                    | 52.3% (43.6–60.1%) | 1008.2 (732.4–1350.4) | -53% (-65 to -38.2%)     | 48.3% (38.7–58.6%) | 44.1 (30.5–61.3) | -57.2% (-68.2 to -43.2%) |
|                                            | Ischaemic stroke          | 50.2% (40.3–59.7%) | 710.9 (520.3–916.7)   | -42% (-56 to -25%)       | 46.2% (35.1–57.8%) | 33 (22.5–45.7)   | -48.7% (-61.8 to -32.4%) |
|                                            | Intracerebral haemorrhage | 58.5% (47.8–67.9%) | 263.6 (174.8–410.7)   | -68.1% (-78.7 to -53.9%) | 56.2% (44.3–66.7%) | 10.1 (6.5–16.5)  | -71.6% (-80.7 to -59.2%) |
|                                            | Subarachnoid haemorrhage  | 55.1% (45.3–65.3%) | 33.7 (16.6–56.7)      | -64.2% (-78.3 to -42%)   | 55.5% (44.6–65.7%) | 1.1 (0.5–1.9)    | -68.2% (-80.8 to -47.1%) |
| High temperature                           | Stroke                    | 5.8% (1.7–11.8%)   | 112.3 (33–237.2)      | -41.4% (-82.9 to -15.8%) | 7.1% (2.1–14.4%)   | 6.5 (1.9–13.9)   | -41.1% (-82.8 to -19.5%) |
|                                            | Ischaemic stroke          | 5.6% (1.6–11.3%)   | 79.6 (23.4–172)       | -27.7% (-79.9 to 3.4%)   | 7.1% (2.1–14.4%)   | 5.1 (1.5–10.9)   | -30.6% (-80.3 to -4.7%)  |
|                                            | Intracerebral haemorrhage | 6.4% (1.9–13.1%)   | 29.1 (7.9–61.2)       | -59.6% (-88 to -33.7%)   | 7.1% (2.1–14.4%)   | 1.3 (0.4–2.7)    | -62.2% (-88.4 to -40.5%) |
|                                            | Subarachnoid haemorrhage  | 6% (1.8–12.2%)     | 3.7 (1–9)             | -61.3% (-89.4 to -25.5%) | 7.1% (2.1–14.4%)   | 0.1 (0–0.3)      | -58.9% (-88.1 to -24.7%) |
| Household air pollution from solid fuels   | Meningitis                | 0% (0–0%)          | <0.1 (<0.1–<0.1)      | -99.9% (-100 to -99.8%)  | 0% (0–0%)          | <0.1 (<0.1–<0.1) | -99.9% (-100 to -99.8%)  |
|                                            | Encephalitis              | 0% (0–0%)          | <0.1 (<0.1–<0.1)      | -99.5% (-99.9 to -98%)   | 0% (0–0%)          | <0.1 (<0.1–<0.1) | -99.5% (-99.9 to -98%)   |
|                                            | Stroke                    | 0% (0–0%)          | <0.1 (<0.1–<0.1)      | -99.6% (-99.9 to -98.9%) | 0% (0–0%)          | <0.1 (<0.1–<0.1) | -99.6% (-99.9 to -99%)   |
|                                            | Ischaemic stroke          | 0% (0–0%)          | <0.1 (<0.1–<0.1)      | -99.5% (-99.8 to -98.7%) | 0% (0–0%)          | <0.1 (<0.1–<0.1) | -99.6% (-99.9 to -98.9%) |
|                                            | Intracerebral haemorrhage | 0% (0–0%)          | <0.1 (<0.1–<0.1)      | -99.7% (-99.9 to -99.3%) | 0% (0–0%)          | <0.1 (<0.1–<0.1) | -99.8% (-99.9 to -99.3%) |
|                                            | Subarachnoid haemorrhage  | 0% (0–0%)          | <0.1 (<0.1–<0.1)      | -99.7% (-99.9 to -99.2%) | 0% (0–0%)          | <0.1 (<0.1–<0.1) | -99.7% (-99.9 to -99.3%) |
| Kidney dysfunction                         | Stroke                    | 13% (10.2–15.8%)   | 251.4 (174.6–342.6)   | -28.1% (-45.5 to -6.6%)  | 12.1% (7.9–15.6%)  | 11 (6.6–16.3)    | -34.7% (-52.5 to -12.2%) |
|                                            | Ischaemic stroke          | 14.3% (10.6–17.8%) | 202.2 (136.8–278.4)   | -13.9% (-34.1 to 10.8%)  | 12.3% (7.1–16.9%)  | 8.8 (4.8–13.4)   | -23.2% (-43.6 to 2.1%)   |
|                                            | Intracerebral haemorrhage | 10.9% (8.8–13.4%)  | 49.2 (32.1–74.7)      | -57.2% (-70.1 to -38.9%) | 12.5% (9.5–15.6%)  | 2.2 (1.4–3.7)    | -59% (-71.4 to -41.4%)   |
| Lead exposure                              | Stroke                    | 1.7% (0.3–3.4%)    | 32.4 (5.9–69.5)       | -67.9% (-84.3 to -54.1%) | 1.9% (0.5–3.6%)    | 1.8 (0.5–3.6)    | -63.6% (-77.8 to -50.3%) |
|                                            | Ischaemic stroke          | 1.7% (0.4–3.5%)    | 24.4 (4.9–51.2)       | -56.8% (-78.4 to -40.3%) | 1.9% (0.5–3.6%)    | 1.4 (0.4–2.7)    | -53.6% (-71.1 to -36.7%) |
|                                            | Intracerebral haemorrhage | 1.6% (0.2–3.7%)    | 7.2 (0.8–19.1)        | -82% (-93.7 to -71%)     | 2% (0.4–4.1%)      | 0.4 (0.1–0.9)    | -79.2% (-90.2 to -68.8%) |
|                                            | Subarachnoid haemorrhage  | 1.2% (0.1–3.1%)    | 0.8 (0.1–2.2)         | -82.3% (-94 to -68.4%)   | 1.8% (0.3–3.9%)    | <0.1 (<0.1–0.1)  | -78.2% (-90.2 to -62.4%) |
| Low birth weight                           | Meningitis                | 1.2% (0.6–3.1%)    | 0.4 (0.2–1)           | -92.9% (-96.5 to -85.8%) | 0.6% (0.3–1.6%)    | <0.1 (<0.1–<0.1) | -92.9% (-96.5 to -85.8%) |
|                                            | Encephalitis              | 1.9% (0.9–3.6%)    | 0.3 (0.1–0.6)         | -35.4% (-75.9 to 67.6%)  | 1.2% (0.5–2.3%)    | <0.1 (<0.1–<0.1) | -35.4% (-75.9 to 67.6%)  |
| Low birth weight and short gestation       | Meningitis                | 1.4% (0.7–3.4%)    | 0.4 (0.2–1.1)         | -92.9% (-96.5 to -85.7%) | 0.6% (0.3–1.7%)    | <0.1 (<0.1–<0.1) | -92.9% (-96.5 to -85.7%) |
|                                            | Encephalitis              | 2.1% (1.3–9%)      | 0.4 (0.2–0.7)         | -34.6% (-75.4 to 68.7%)  | 1.3% (0.6–2.5%)    | <0.1 (<0.1–<0.1) | -34.6% (-75.4 to 68.7%)  |
| Low physical activity                      | Stroke                    | 8% (1.9–16%)       | 153.3 (34.2–310.3)    | -29.9% (-46.5 to -9.7%)  | 9.3% (2.4–17.4%)   | 8.5 (2.1–16.1)   | -37.7% (-52.6 to -18.9%) |
|                                            | Ischaemic stroke          | 10.8% (2.5–21.5%)  | 153.3 (34.2–310.3)    | -29.9% (-46.5 to -9.7%)  | 11.9% (3.1–22%)    | 8.5 (2.1–16.1)   | -37.7% (-52.6 to -18.9%) |
| Low temperature                            | Stroke                    | 3.4% (-5.3–11.1%)  | 65.2 (-109.2–220.9)   |                          | 4.1% (-6.5–13.1%)  | 3.7 (-6.3–12.7)  |                          |
|                                            | Ischaemic stroke          | 3.3% (-5.1–10.6%)  | 46.2 (-76.4–156.6)    |                          | 4.1% (-6.5–13.1%)  | 2.9 (-4.8–10)    |                          |
|                                            | Intracerebral haemorrhage | 3.7% (-5.9–12.1%)  | 16.9 (-28.3–59.6)     |                          | 4.1% (-6.5–13.1%)  | 0.7 (-1.2–2.6)   |                          |
|                                            | Subarachnoid haemorrhage  | 3.5% (-5.7–11.5%)  | 2.1 (-3.7–8.2)        |                          | 4.1% (-6.5–13.1%)  | 0.1 (-0.1–0.3)   |                          |
| Metabolic risk factors†                    | Stroke                    | 78% (71.2–84.5%)   | 1503.1 (1159.1–1956)  | -45.9% (-59 to -30.1%)   | 73.4% (63.6–83.7%) | 67 (49.6–89.4)   | -51.1% (-62.7 to -36.2%) |
|                                            | Ischaemic stroke          | 77.9% (69.8–86.2%) | 1102.5 (853–1370.2)   | -34% (-49 to -15.8%)     | 72.8% (60.9–85.4%) | 52 (37.4–67.8)   | -42.1% (-56 to -24.7%)   |



**Table S16** Regional and national disabilities and deaths related to neurological conditions attributable to risk factors in North Africa and Middle East countries

| Location<br>Risk factor (alphabetic order) | Cause                                   | DALYs (95% UI)     |                     |                           | Deaths (95% UI)    |                  |                           |
|--------------------------------------------|-----------------------------------------|--------------------|---------------------|---------------------------|--------------------|------------------|---------------------------|
|                                            |                                         | PAF (%)            | Rate per 100,000    | Rate change (%)           | PAF (%)            | Rate per 100,000 | Rate change (%)           |
|                                            |                                         | 2019               | 2019                | From 1990 to 2019         | 2019               | 2019             | From 1990 to 2019         |
|                                            | Intracerebral haemorrhage               | 79% (72.1–84.7%)   | 356 (248–532.9)     | -64.3% (-75.6 to -49%)    | 76.1% (67.6–83.3%) | 13.6 (9.2–21.3)  | -68.5% (-78.2 to -54.8%)  |
|                                            | Subarachnoid haemorrhage                | 73.2% (65.5–80.4%) | 44.6 (22.6–72.8)    | -60.1% (-75.7 to -34.9%)  | 72% (63.2–79.8%)   | 1.4 (0.6–2.3)    | -65.2% (-78.8 to -41.6%)  |
|                                            | Neurological disorders*                 | 10.3% (3.5–21.8%)  | 147 (48.8–377.7)    | 32.6% (8.4 to 77.1%)      | 24.4% (9.2–43.3%)  | 9.5 (1.7–28.7)   | 32.9% (3.5 to 91.9%)      |
|                                            | Alzheimer's disease and other dementias | 40% (20.1–60%)     | 147 (48.8–377.7)    | 32.6% (8.4 to 77.1%)      | 38.9% (18.8–59%)   | 9.5 (1.7–28.7)   | 32.9% (3.5 to 91.9%)      |
| Non-optimal temperature                    | Stroke                                  | 9% (-0.8–17.6%)    | 173 (-14.4–365.4)   | -46.5% (-139.8 to 19.3%)  | 10.9% (-0.9–20.9%) | 9.9 (-0.8–21)    | -46.2% (-137.9 to 21.6%)  |
|                                            | Ischaemic stroke                        | 8.6% (-0.7–17%)    | 122.6 (-10.2–255.2) | -34% (-150.7 to 51.6%)    | 10.9% (-0.9–20.9%) | 7.8 (-0.7–16.1)  | -36.7% (-146.3 to 41.9%)  |
|                                            | Intracerebral haemorrhage               | 9.9% (-0.8–19.1%)  | 44.8 (-3.6–100.6)   | -63.1% (-126.4 to -15.4%) | 10.9% (-0.9–20.9%) | 1.9 (-0.2–4.3)   | -65.5% (-123.2 to -21.6%) |
|                                            | Subarachnoid haemorrhage                | 9.3% (-0.8–18.4%)  | 5.7 (-0.5–13.6)     | -64.9% (-123.4 to -19.3%) | 10.9% (-0.9–20.9%) | 0.2 (0–0.5)      | -62.6% (-126 to -16.7%)   |
| Other environmental risks                  | Stroke                                  | 1.7% (0.3–3.4%)    | 32.4 (5.9–69.5)     | -67.9% (-84.3 to -54.1%)  | 1.9% (0.5–3.6%)    | 1.8 (0.5–3.6)    | -63.6% (-77.8 to -50.3%)  |
|                                            | Ischaemic stroke                        | 1.7% (0.4–3.5%)    | 24.4 (4.9–51.2)     | -56.8% (-78.4 to -40.3%)  | 1.9% (0.5–3.6%)    | 1.4 (0.4–2.7)    | -53.6% (-71.1 to -36.7%)  |
|                                            | Intracerebral haemorrhage               | 1.6% (0.2–3.7%)    | 7.2 (0.8–19.1)      | -82% (-93.7 to -71%)      | 2% (0.4–4.1%)      | 0.4 (0.1–0.9)    | -79.2% (-90.2 to -68.8%)  |
|                                            | Subarachnoid haemorrhage                | 1.2% (0.1–3.1%)    | 0.8 (0.1–2.2)       | -82.3% (-94 to -68.4%)    | 1.8% (0.3–3.9%)    | <0.1 (<0.1–0.1)  | -78.2% (-90.2 to -62.4%)  |
| Particulate matter pollution               | Meningitis                              | 0.3% (0.1–0.7%)    | 0.1 (0–0.2)         | -92.7% (-97.6 to -80.6%)  | 0.1% (0–0.3%)      | <0.1 (<0.1–<0.1) | -92.7% (-97.6 to -80.6%)  |
|                                            | Encephalitis                            | 0.4% (0.1–0.9%)    | 0.1 (0–0.1)         | -32.4% (-81.4 to 130.9%)  | 0.2% (0.1–0.5%)    | <0.1 (<0.1–<0.1) | -32.4% (-81.4 to 130.9%)  |
|                                            | Stroke                                  | 30.2% (24.4–35.7%) | 581.5 (421.7–780.4) | -44.3% (-58.2 to -26.9%)  | 25.8% (20.7–30.8%) | 23.5 (16.3–32.9) | -49.9% (-62.5 to -34%)    |
|                                            | Ischaemic stroke                        | 29% (23.5–34.4%)   | 410.8 (301.2–545.8) | -31.2% (-47.6 to -11.2%)  | 24.7% (19.8–29.9%) | 17.7 (12.4–24.3) | -40.1% (-55.3 to -21.3%)  |
| Secondhand smoke                           | Intracerebral haemorrhage               | 33.4% (27.3–39.7%) | 150.4 (99.8–226)    | -62.4% (-74.7 to -45.6%)  | 29.4% (23.7–35.2%) | 5.3 (3.4–8.1)    | -66.8% (-77.6 to -51.9%)  |
|                                            | Subarachnoid haemorrhage                | 33.4% (27.3–39.6%) | 20.3 (10.5–33.7)    | -58% (-74.3 to -30.2%)    | 30.2% (24.5–35.8%) | 0.6 (0.3–1)      | -63.3% (-78.2 to -38.3%)  |
|                                            | Stroke                                  | 4.4% (3.3–5.6%)    | 84.4 (57.1–118.7)   | -43.1% (-58.5 to -22.5%)  | 3.9% (3–4.9%)      | 3.6 (2.4–5)      | -47.1% (-61.5 to -28.2%)  |
|                                            | Ischaemic stroke                        | 4.1% (3.1–5.3%)    | 58.2 (40.5–80.4)    | -28.6% (-47.4 to -3.6%)   | 3.7% (2.8–4.7%)    | 2.6 (1.8–3.7)    | -36% (-53.5 to -12.7%)    |
| Short gestation                            | Intracerebral haemorrhage               | 5.1% (3.8–6.5%)    | 23 (14.4–36.6)      | -61.3% (-74.5 to -42.7%)  | 4.6% (3.5–5.8%)    | 0.8 (0.5–1.3)    | -65.1% (-76.5 to -49.2%)  |
|                                            | Subarachnoid haemorrhage                | 5.2% (3.9–6.6%)    | 3.1 (1.6–5.3)       | -57.2% (-74.4 to -27.3%)  | 4.9% (3.7–6.1%)    | 0.1 (0–0.2)      | -61.5% (-76.5 to -34.3%)  |
|                                            | Meningitis                              | 1% (0.5–2.6%)      | 0.3 (0.2–0.8)       | -91.9% (-96 to -83.7%)    | 0.5% (0.2–1.3%)    | <0.1 (<0.1–<0.1) | -91.9% (-96 to -83.7%)    |
|                                            | Encephalitis                            | 1.6% (0.7–3%)      | 0.3 (0.1–0.5)       | -25.5% (-71.8 to 91.9%)   | 1% (0.4–1.9%)      | <0.1 (<0.1–<0.1) | -25.5% (-71.8 to 92%)     |
| Smoking                                    | Stroke                                  | 13.2% (11.4–15.1%) | 255.1 (187–339.5)   | -39.5% (-57.9 to -14.7%)  | 9.5% (8.1–11.1%)   | 8.7 (6.2–11.8)   | -44.4% (-61.5 to -20.7%)  |
|                                            | Ischaemic stroke                        | 12.1% (10.5–13.9%) | 171.5 (127.5–222.4) | -22.4% (-45.2 to 9.5%)    | 8.6% (7.3–10%)     | 6.1 (4.4–8.1)    | -30.6% (-52.6 to 1%)      |
|                                            | Intracerebral haemorrhage               | 16.5% (14–18.9%)   | 74.3 (49.4–111.5)   | -58.8% (-74.5 to -36.5%)  | 13% (11.1–15.1%)   | 2.3 (1.5–3.6)    | -62.5% (-76.6 to -41.5%)  |
|                                            | Subarachnoid haemorrhage                | 15.1% (11.9–18.8%) | 9.3 (4.2–15.9)      | -54.4% (-75.4 to -20%)    | 12.5% (9.7–16.1%)  | 0.3 (0.1–0.5)    | -59.3% (-78.1 to -25.7%)  |
|                                            | Neurological disorders*                 | 3.4% (1.8–2%)      | 49.7 (12.8–129.2)   | 12.4% (-15.1 to 53.1%)    | 7.5% (1–14.7%)     | 3 (0.2–10)       | 19.4% (-15.7 to 103.7%)   |
|                                            | Alzheimer's disease and other dementias | 15.5% (9.4–22.5%)  | 56.9 (21–135.5)     | 10.7% (-15.4 to 49%)      | 14.6% (8.8–21.4%)  | 3.5 (0.8–10.4)   | 16.2% (-12.9 to 68.6%)    |
|                                            | Parkinson's disease                     | -7.3% (-11.3–3.7%) | -9.5 (-15.9–4.5)    | 1.8% (-31.8 to 50.1%)     | -6.8% (-10.7–3.5%) | -0.5 (-0.9–0.3)  | 1.5% (-33.1 to 51.8%)     |

**Table S16** Regional and national disabilities and deaths related to neurological conditions attributable to risk factors in North Africa and Middle East countries

| Location<br>Risk factor (alphabetic order) | Cause                                   | DALYs (95% UI)      |                        |                           | Deaths (95% UI)    |                        |                           |
|--------------------------------------------|-----------------------------------------|---------------------|------------------------|---------------------------|--------------------|------------------------|---------------------------|
|                                            |                                         | PAF (%)             | Rate per 100,000       | Rate change (%)           | PAF (%)            | Rate per 100,000       | Rate change (%)           |
|                                            |                                         | 2019                | 2019                   | From 1990 to 2019         | 2019               | 2019                   | From 1990 to 2019         |
| Tobacco                                    | Multiple sclerosis                      | 11.2% (7.7–15.2%)   | 2.3 (1.2–4)            | 7.7% (-31.6 to 58.1%)     | 11.7% (7.2–16%)    | <0.1 (<0.1–0.1)        | 18.7% (-38.3 to 91.2%)    |
|                                            | Stroke                                  | 17% (15–19%)        | 326.9 (240.9–435.4)    | -40.6% (-57.6 to -17.6%)  | 13% (11.4–14.7%)   | 11.9 (8.6–16)          | -45.3% (-60.7 to -25%)    |
|                                            | Ischaemic stroke                        | 15.7% (13.9–17.6%)  | 221.7 (167.4–284.6)    | -24.3% (-45.4 to 4.5%)    | 11.9% (10.3–13.6%) | 8.5 (6.2–11.2)         | -32.5% (-51.9 to -6.3%)   |
|                                            | Intracerebral haemorrhage               | 20.7% (18.2–23.2%)  | 93.3 (62.8–138.8)      | -59.5% (-74.5 to -38.8%)  | 16.9% (14.7–19.2%) | 3 (2–4.6)              | -63.3% (-76.4 to -44.6%)  |
|                                            | Subarachnoid haemorrhage                | 19.5% (16.1–23%)    | 11.9 (5.7–20.1)        | -55.3% (-75 to -23.2%)    | 16.7% (14–20%)     | 0.3 (0.1–0.6)          | -60.1% (-77.9 to -29.8%)  |
|                                            | Neurological disorders*                 | 3.4% (1.8–2%)       | 49.7 (12.8–129.2)      | 12.4% (-15.1 to 53.1%)    | 7.5% (1–14.7%)     | 3 (0.2–10)             | 19.4% (-15.7 to 103.7%)   |
|                                            | Alzheimer's disease and other dementias | 15.5% (9.4–22.5%)   | 56.9 (21–135.5)        | 10.7% (-15.4 to 49%)      | 14.6% (8.8–21.4%)  | 3.5 (0.8–10.4)         | 16.2% (-12.9 to 68.6%)    |
|                                            | Parkinson's disease                     | -7.3% (-11.3–3.7%)  | -9.5 (-15.9–4.5)       | 1.8% (-31.8 to 50.1%)     | -6.8% (-10.7–3.5%) | -0.5 (-0.9–0.3)        | 1.5% (-33.1 to 51.8%)     |
| Multiple sclerosis                         | 11.2% (7.7–15.2%)                       | 2.3 (1.2–4)         | 7.7% (-31.6 to 58.1%)  | 11.7% (7.2–16%)           | <0.1 (<0.1–0.1)    | 18.7% (-38.3 to 91.2%) |                           |
| <b>Yemen</b>                               |                                         |                     |                        |                           |                    |                        |                           |
| Air pollution                              | Meningitis                              | 1.1% (0.6–1.8%)     | 1.1 (0.6–1.8)          | -79.2% (-90.3 to -57.6%)  | 0.6% (0.3–1.1%)    | <0.1 (<0.1–<0.1)       | -79.2% (-90.3 to -57.6%)  |
|                                            | Encephalitis                            | 0.5% (0.2–1%)       | 0.1 (0.1–0.3)          | -25.9% (-71 to 86.7%)     | 0.3% (0.1–0.7%)    | <0.1 (<0.1–<0.1)       | -25.9% (-71 to 86.8%)     |
|                                            | Stroke                                  | 33.7% (27.2–40.1%)  | 934 (673.2–1267.3)     | -40.6% (-57.8 to -16.7%)  | 29.6% (23.5–35.4%) | 40.2 (28.4–55.1)       | -42.6% (-59.1 to -19.6%)  |
|                                            | Ischaemic stroke                        | 32.3% (25.9–38.6%)  | 554.1 (404.3–754)      | -5.7% (-33.1 to 28.9%)    | 28.1% (22.2–33.8%) | 26.2 (18.6–36.9)       | -14.1% (-40.4 to 20.8%)   |
|                                            | Intracerebral haemorrhage               | 36.3% (29.5–42.8%)  | 321.5 (221.6–445.2)    | -62.2% (-73.9 to -44.8%)  | 32.8% (26.3–39.1%) | 11.8 (8.1–16.5)        | -65.4% (-76.1 to -50.1%)  |
|                                            | Subarachnoid haemorrhage                | 35.6% (28.8–42.3%)  | 58.5 (30.7–98.9)       | -56.9% (-71.7 to -28.7%)  | 32.6% (26–39.2%)   | 2.1 (1–3.7)            | -60.3% (-74.3 to -32.8%)  |
| Alcohol use                                | Stroke                                  | 0.5% (0.2–0.7%)     | 12.6 (4.8–22.4)        | -78.6% (-90.1 to -62.2%)  | 0.3% (0.1–0.5%)    | 0.4 (0.1–0.7)          | -80.9% (-92.9 to -65.1%)  |
|                                            | Ischaemic stroke                        | 0.1% (0–0.3%)       | 2.2 (-0.7–6)           | -70.1% (-119.3 to -32.2%) | 0.1% (-0.1–0.2%)   | 0.1 (-0.1–0.2)         | -77.3% (-143.2 to -33.9%) |
|                                            | Intracerebral haemorrhage               | 1.2% (0.6–1.9%)     | 10.3 (4.9–17.7)        | -79.9% (-89.5 to -65.8%)  | 0.9% (0.4–1.5%)    | 0.3 (0.1–0.6)          | -81.5% (-90.4 to -68.8%)  |
|                                            | Neurological disorders*                 | 0.2% (0.1–0.4%)     | 2.2 (1–4.1)            | -60.1% (-81.7 to -15.8%)  | 0.1% (0–0.2%)      | <0.1 (<0.1–<0.1)       | -60.7% (-78.2 to -32.2%)  |
|                                            | Idiopathic epilepsy                     | 1.5% (0.9–2.3%)     | 2.2 (1–4.1)            | -60.1% (-81.7 to -15.8%)  | 1.8% (1–2.7%)      | <0.1 (<0.1–<0.1)       | -60.7% (-78.2 to -32.2%)  |
| All risk factors                           | Meningitis                              | 5.3% (3–8.5%)       | 5.1 (2.8–8.8)          | -72.4% (-86.7 to -44.7%)  | 2.9% (1.6–5.2%)    | 0.1 (0–0.1)            | -72.4% (-86.7 to -44.7%)  |
|                                            | Encephalitis                            | 2.3% (1.1–4.7%)     | 0.7 (0.3–1.3)          | -3.7% (-58.3 to 134.1%)   | 1.6% (0.7–3%)      | <0.1 (<0.1–<0.1)       | -3.7% (-58.3 to 134.2%)   |
|                                            | Stroke                                  | 86.4% (83.1–89.9%)  | 2391.7 (1853.8–3075.2) | -23.1% (-40.5 to 1.9%)    | 84.5% (79.9–89.6%) | 114.7 (86.2–148.7)     | -21.7% (-38.7 to 2.7%)    |
|                                            | Ischaemic stroke                        | 87% (82.8–91.6%)    | 1493.7 (1176.3–1906.4) | 22% (-3.7 to 56%)         | 84.2% (78.5–91%)   | 78.6 (59.2–103.2)      | 17.1% (-8.8 to 50.4%)     |
|                                            | Intracerebral haemorrhage               | 86.1% (82.2–89.3%)  | 762.3 (558.6–1017.9)   | -53.2% (-65.8 to -35.6%)  | 85.4% (80.7–89.6%) | 30.8 (22.6–40.5)       | -55.4% (-66.7 to -39.4%)  |
|                                            | Subarachnoid haemorrhage                | 82.4% (78–86.2%)    | 135.7 (70.2–225.2)     | -46.8% (-63.3 to -15%)    | 82.9% (77.2–87.6%) | 5.3 (2.6–9.1)          | -48.6% (-64.2 to -17.3%)  |
|                                            | Neurological disorders*                 | 8.9% (3.5–18.2%)    | 117 (42.4–300.1)       | 22% (-0.4 to 47.3%)       | 20% (9–31.8%)      | 7 (1.2–22.8)           | 32% (3.4 to 69.1%)        |
|                                            | Alzheimer's disease and other dementias | 31.5% (21.1–43%)    | 121.1 (45.4–304.8)     | 25.6% (4.2 to 50.6%)      | 28.9% (18.8–40.5%) | 7.4 (1.6–23.3)         | 32.1% (4.2 to 67.6%)      |
|                                            | Parkinson's disease                     | -10.8% (-15.6–5.9%) | -8.3 (-13–4.4)         | 7.2% (-23.8 to 55.5%)     | -9.6% (-14.2–5.3%) | -0.4 (-0.7–0.2)        | 18% (-16.8 to 74.9%)      |
|                                            | Idiopathic epilepsy                     | 1.5% (0.9–2.3%)     | 2.2 (1–4.1)            | -60.1% (-81.7 to -15.8%)  | 1.8% (1–2.7%)      | <0.1 (<0.1–<0.1)       | -60.7% (-78.2 to -32.2%)  |

**Table S16** Regional and national disabilities and deaths related to neurological conditions attributable to risk factors in North Africa and Middle East countries

| Location<br>Risk factor (alphabetic order) | Cause                                   | DALYs (95% UI)       |                          |                          | Deaths (95% UI)     |                          |                          |
|--------------------------------------------|-----------------------------------------|----------------------|--------------------------|--------------------------|---------------------|--------------------------|--------------------------|
|                                            |                                         | PAF (%)              | Rate per 100,000         | Rate change (%)          | PAF (%)             | Rate per 100,000         | Rate change (%)          |
|                                            |                                         | 2019                 | 2019                     | From 1990 to 2019        | 2019                | 2019                     | From 1990 to 2019        |
| Ambient particulate matter pollution       | Multiple sclerosis                      | 14.3% (10.2–18.6%)   | 2 (1.2–2.9)              | 16.6% (-22.8 to 68%)     | 15.2% (10.4–20.8%)  | <0.1 (<0.1–0.1)          | 17% (-37.2 to 102%)      |
|                                            | Meningitis                              | 0.5% (0.2–1%)        | 0.5 (0.2–1)              | 14.7% (-54.5 to 355%)    | 0.3% (0.1–0.6%)     | <0.1 (<0.1–<0.1)         | 14.6% (-54.5 to 355%)    |
|                                            | Encephalitis                            | 0.2% (0.1–0.6%)      | 0.1 (0–0.2)              | 300.9% (27.2 to 1644%)   | 0.2% (0.1–0.4%)     | <0.1 (<0.1–<0.1)         | 300.9% (27.1 to 1644.5%) |
|                                            | Stroke                                  | 18.2% (9.4–27.7%)    | 504.6 (240.8–806.7)      | 204.1% (60.2 to 642.4%)  | 16% (8.1–24.4%)     | 21.7 (10.5–35.1)         | 201.5% (63.6 to 602.8%)  |
|                                            | Ischaemic stroke                        | 17.4% (9–26.6%)      | 298.9 (143.9–478.8)      | 389% (161.3 to 1087.8%)  | 15.2% (7.7–23.4%)   | 14.2 (6.7–23.5)          | 359.3% (146.8 to 979.9%) |
|                                            | Intracerebral haemorrhage               | 19.7% (10.2–29.7%)   | 174.4 (82.6–285.2)       | 92.4% (-0.6 to 400.9%)   | 17.8% (9.2–27.1%)   | 6.4 (3.1–10.6)           | 79.8% (-4.6 to 350.9%)   |
| Behavioural risk factors‡                  | Subarachnoid haemorrhage                | 19% (9.5–28.8%)      | 31.3 (11.8–63.9)         | 120.7% (8.4 to 522.8%)   | 17.5% (8.8–26.9%)   | 1.1 (0.4–2.3)            | 106.7% (4.6 to 463.6%)   |
|                                            | Meningitis                              | 5.1% (2.9–8.3%)      | 5 (2.7–8.6)              | -71.9% (-86.4 to -43.6%) | 2.9% (1.6–5.1%)     | 0.1 (0–0.1)              | -71.9% (-86.4 to -43.6%) |
|                                            | Encephalitis                            | 2.3% (1.1–4.5%)      | 0.7 (0.3–1.2)            | -2.1% (-57.5 to 138.7%)  | 1.5% (0.7–2.9%)     | <0.1 (<0.1–<0.1)         | -2.1% (-57.5 to 138.7%)  |
|                                            | Stroke                                  | 44% (38.6–49.2%)     | 1218.4 (918.1–1614.3)    | -23.7% (-42.4 to 2.3%)   | 39.3% (33.7–44.9%)  | 53.3 (39.3–71.7)         | -21.2% (-38.5 to 4.3%)   |
|                                            | Ischaemic stroke                        | 43.7% (37.2–50.6%)   | 751 (569.5–1000.7)       | 23.9% (-3.3 to 60.5%)    | 39% (32.5–46.4%)    | 36.4 (26.5–50)           | 19.9% (-5.9 to 54.2%)    |
|                                            | Intracerebral haemorrhage               | 44.9% (38.7–51.3%)   | 397.1 (278.8–548.6)      | -53.8% (-66.7 to -35.1%) | 40.1% (34.3–46.5%)  | 14.5 (10.2–19.9)         | -55.5% (-67.7 to -38%)   |
|                                            | Subarachnoid haemorrhage                | 42.6% (35.5–49.6%)   | 70.3 (36.2–120.9)        | -46.6% (-63.2 to -12.6%) | 38.7% (31.4–45.7%)  | 2.5 (1.2–4.5)            | -48.3% (-64.1 to -15.8%) |
|                                            | Neurological disorders*                 | 5% (1.8–10.4%)       | 65.4 (22.1–163)          | 4.8% (-18.6 to 31.3%)    | 10.1% (3.4–16.9%)   | 3.6 (0.5–11.2)           | 16.5% (-17.6 to 54.2%)   |
|                                            | Alzheimer's disease and other dementias | 18.1% (11.5–24.6%)   | 69.5 (26.8–167.5)        | 10.5% (-12.5 to 38.1%)   | 15.5% (9.6–21.8%)   | 4 (0.8–11.5)             | 18.1% (-11.2 to 55.7%)   |
|                                            | Parkinson's disease                     | -10.8% (-15.6–-5.9%) | -8.3 (-13–4.4)           | 7.2% (-23.8 to 55.5%)    | -9.6% (-14.2–-5.3%) | -0.4 (-0.7–0.2)          | 18% (-16.8 to 74.9%)     |
| Idiopathic epilepsy                        | 1.5% (0.9–2.3%)                         | 2.2 (1.4–1)          | -60.1% (-81.7 to -15.8%) | 1.8% (1.2–7%)            | <0.1 (<0.1–<0.1)    | -60.7% (-78.2 to -32.2%) |                          |
| Child and maternal malnutrition            | Multiple sclerosis                      | 14.3% (10.2–18.6%)   | 2 (1.2–2.9)              | 16.6% (-22.8 to 68%)     | 15.2% (10.4–20.8%)  | <0.1 (<0.1–0.1)          | 17% (-37.2 to 102%)      |
|                                            | Meningitis                              | 5.1% (2.9–8.3%)      | 5 (2.7–8.6)              | -71.9% (-86.4 to -43.6%) | 2.9% (1.6–5.1%)     | 0.1 (0–0.1)              | -71.9% (-86.4 to -43.6%) |
|                                            | Encephalitis                            | 2.3% (1.1–4.5%)      | 0.7 (0.3–1.2)            | -2.1% (-57.5 to 138.7%)  | 1.5% (0.7–2.9%)     | <0.1 (<0.1–<0.1)         | -2.1% (-57.5 to 138.7%)  |
| Diet high in red meat                      | Stroke                                  | 2.6% (0.9–4.2%)      | 72.2 (23.1–125.3)        | -21.9% (-52 to 34.6%)    | 2% (0.7–3.2%)       | 2.7 (0.9–4.8)            | -23.1% (-52 to 28%)      |
|                                            | Ischaemic stroke                        | 2.3% (0.3–3.8%)      | 38.9 (5.1–71.9)          | 36.9% (4.2 to 87.7%)     | 1.7% (0.3–2.8%)     | 1.6 (0.3–3)              | 28.1% (-2.8 to 73.9%)    |
|                                            | Intracerebral haemorrhage               | 3.2% (0.4–5.4%)      | 28.1 (3.1–55.2)          | -49% (-64 to -24.5%)     | 2.7% (0.3–4.6%)     | 1 (0.1–1.9)              | -51.7% (-65 to -31.1%)   |
|                                            | Subarachnoid haemorrhage                | 3.2% (0.3–5.5%)      | 5.2 (0.5–11.7)           | -42.1% (-60.8 to -4.9%)  | 2.7% (0.3–4.7%)     | 0.2 (0–0.4)              | -45% (-62.4 to -8.4%)    |
| Diet high in sodium                        | Stroke                                  | 1.9% (0.3–7.5%)      | 51.8 (6.9–205.3)         | -25.7% (-57.2 to 39.8%)  | 1.6% (0.3–6.3%)     | 2.2 (0.4–8.8)            | -24.1% (-55.1 to 35.7%)  |
|                                            | Ischaemic stroke                        | 1.7% (0.3–6.8%)      | 29.2 (4.3–116.9)         | 24.7% (-29.7 to 116.9%)  | 1.4% (0.3–5.6%)     | 1.3 (0.2–5.4)            | 22.7% (-31 to 108.2%)    |
|                                            | Intracerebral haemorrhage               | 2.2% (0.3–8.5%)      | 19.3 (2.1–79.3)          | -52.1% (-74.8 to -4.9%)  | 2% (0.3–7.9%)       | 0.7 (0.1–3)              | -53.8% (-75.2 to -14.1%) |
|                                            | Subarachnoid haemorrhage                | 2% (0.2–8%)          | 3.3 (0.3–14.7)           | -45.6% (-72.7 to 20%)    | 1.9% (0.3–7.5%)     | 0.1 (0–0.6)              | -47.3% (-72.6 to 7.2%)   |
| Diet low in fibre                          | Stroke                                  | 5.5% (1.3–9.4%)      | 152 (34.9–282.4)         | -15.7% (-36.3 to 18.7%)  | 4.7% (1.1–8%)       | 6.3 (1.5–11.9)           | -16.8% (-35.6 to 15.6%)  |
|                                            | Ischaemic stroke                        | 5.1% (1.2–8.7%)      | 88.4 (20.6–164.9)        | 40.2% (8.4 to 89.2%)     | 4.3% (1.1–7.4%)     | 4 (1–7.5)                | 30.7% (0.8 to 75.9%)     |
|                                            | Intracerebral haemorrhage               | 6% (1.4–10.4%)       | 53.5 (11.8–99.5)         | -46.9% (-62.2 to -21.5%) | 5.4% (1.3–9.3%)     | 2 (0.4–3.6)              | -50.1% (-63.3 to -28.7%) |
|                                            | Subarachnoid haemorrhage                | 6.1% (1.4–10.4%)     | 10.1 (2.1–23.1)          | -39.4% (-58.6 to 0.8%)   | 5.4% (1.3–9.3%)     | 0.4 (0.1–0.8)            | -42.4% (-59.1 to -2.8%)  |

**Table S16** Regional and national disabilities and deaths related to neurological conditions attributable to risk factors in North Africa and Middle East countries

| Location<br>Risk factor (alphabetic order) | Cause                                   | DALYs (95% UI)     |                      |                          | Deaths (95% UI)    |                  |                          |
|--------------------------------------------|-----------------------------------------|--------------------|----------------------|--------------------------|--------------------|------------------|--------------------------|
|                                            |                                         | PAF (%)            | Rate per 100,000     | Rate change (%)          | PAF (%)            | Rate per 100,000 | Rate change (%)          |
|                                            |                                         | 2019               | 2019                 | From 1990 to 2019        | 2019               | 2019             | From 1990 to 2019        |
| Diet low in fruits                         | Stroke                                  | 8% (4.1–12.2%)     | 220.3 (112.5–360.6)  | -32.2% (-53.6 to -0.6%)  | 6.4% (3.2–10.1%)   | 8.8 (4.2–14.5)   | -32.5% (-53.6 to -2.3%)  |
|                                            | Ischaemic stroke                        | 6% (1.6–11%)       | 103.1 (25.9–205.1)   | 26.1% (-1.5 to 64.6%)    | 4.9% (1.2–9%)      | 4.6 (1.1–9.2)    | 19.9% (-6.2 to 56.8%)    |
|                                            | Intracerebral haemorrhage               | 11.2% (5.7–18.6%)  | 98.9 (47.5–179.8)    | -52.8% (-66.2 to -32.9%) | 9.9% (5–16.7%)     | 3.6 (1.7–6.6)    | -55.1% (-67 to -38%)     |
|                                            | Subarachnoid haemorrhage                | 11.2% (5.6–18.4%)  | 18.3 (7.1–39.6)      | -46.1% (-62.9 to -12.4%) | 9.9% (4.9–16.7%)   | 0.6 (0.2–1.4)    | -48.5% (-64.4 to -16.4%) |
| Diet low in vegetables                     | Stroke                                  | 5.5% (2.4–8.4%)    | 150.9 (63.4–249.5)   | -30.7% (-52 to 8.6%)     | 4.5% (2–6.9%)      | 6.1 (2.6–10)     | -31.5% (-52.1 to 6.6%)   |
|                                            | Ischaemic stroke                        | 3.9% (0.6–7%)      | 66.7 (10.5–125.1)    | 30.6% (1.4 to 71.1%)     | 3.2% (0.6–5.8%)    | 3 (0.5–5.7)      | 23.5% (-3.4 to 62.3%)    |
|                                            | Intracerebral haemorrhage               | 8% (2.1–14%)       | 71.2 (17.5–132.6)    | -50.4% (-64.5 to -26.7%) | 7.3% (1.9–12.6%)   | 2.6 (0.7–4.8)    | -53% (-65.3 to -31.9%)   |
|                                            | Subarachnoid haemorrhage                | 8% (2.1–13.7%)     | 13.1 (2.9–27.1)      | -43.6% (-61.2 to -5.5%)  | 7.2% (1.9–12.4%)   | 0.5 (0.1–1)      | -46.2% (-62.6 to -11.5%) |
| Diet low in whole grains                   | Stroke                                  | 6.1% (3.5–7.8%)    | 168.1 (91.8–240.2)   | 27.5% (0.4 to 63.4%)     | 6% (3.6–7.5%)      | 8.2 (4.7–11.9)   | 22.3% (-3.5 to 57.2%)    |
|                                            | Ischaemic stroke                        | 9.8% (5.5–12.4%)   | 168.1 (91.8–240.2)   | 27.5% (0.4 to 63.4%)     | 8.8% (5.3–11%)     | 8.2 (4.7–11.9)   | 22.3% (-3.5 to 57.2%)    |
| Dietary risks                              | Stroke                                  | 25.8% (19.9–31.8%) | 714.6 (496.1–1006.8) | -20.7% (-40.7 to 7.3%)   | 22.7% (17.3–27.9%) | 30.8 (20.9–44)   | -20% (-38.6 to 6.1%)     |
|                                            | Ischaemic stroke                        | 25.2% (18.6–31.7%) | 433.1 (299–610.3)    | 28.7% (0.5 to 66%)       | 21.9% (16.2–27.6%) | 20.5 (14–29.4)   | 22.8% (-3.6 to 59.1%)    |
|                                            | Intracerebral haemorrhage               | 26.9% (18.6–35.1%) | 237.9 (145.2–359.9)  | -51.1% (-64.7 to -32.2%) | 24.3% (16.7–32.1%) | 8.8 (5.2–13.1)   | -53.6% (-65.8 to -36.7%) |
|                                            | Subarachnoid haemorrhage                | 26.6% (18.4–34.8%) | 43.7 (20.7–81)       | -44.3% (-61.9 to -8.8%)  | 24.2% (16.5–32.1%) | 1.6 (0.7–3)      | -46.7% (-62.4 to -13.2%) |
| Environmental/occupational risk factors§   | Meningitis                              | 1.1% (0.6–1.8%)    | 1.1 (0.6–1.8)        | -79.2% (-90.3 to -57.6%) | 0.6% (0.3–1.1%)    | <0.1 (<0.1–<0.1) | -79.2% (-90.3 to -57.6%) |
|                                            | Encephalitis                            | 0.5% (0.2–1%)      | 0.1 (0.1–0.3)        | -25.9% (-71 to 86.7%)    | 0.3% (0.1–0.7%)    | <0.1 (<0.1–<0.1) | -25.9% (-71 to 86.8%)    |
|                                            | Stroke                                  | 44% (37.8–49.8%)   | 1218 (915.9–1584.5)  | -36% (-52.6 to -13.2%)   | 40.7% (34.9–46.4%) | 55.3 (40.4–73.1) | -35.7% (-52.1 to -13.2%) |
|                                            | Ischaemic stroke                        | 42.4% (36.6–48.1%) | 728.6 (552.6–981)    | 2.9% (-23.8 to 37.6%)    | 39.1% (33.4–44.9%) | 36.5 (26.7–49.9) | -2.7% (-28.2 to 32.2%)   |
|                                            | Intracerebral haemorrhage               | 46.8% (40.4–52.7%) | 414.4 (298.5–567.3)  | -59.8% (-71.3 to -42.6%) | 44.4% (38–50.5%)   | 16 (11.4–21.7)   | -61.9% (-72.3 to -46.2%) |
|                                            | Subarachnoid haemorrhage                | 45.5% (38.9–51.9%) | 75 (38.6–124.6)      | -54.5% (-69.2 to -26.9%) | 43.8% (37.2–50.3%) | 2.8 (1.4–4.8)    | -56.3% (-70.1 to -29%)   |
| High body-mass index                       | Stroke                                  | 20.4% (12–28.6%)   | 564 (299.1–912.1)    | 20.1% (-19.5 to 108.1%)  | 13.1% (7.4–19.3%)  | 17.8 (9.1–29.7)  | 18.6% (-19 to 105.8%)    |
|                                            | Ischaemic stroke                        | 14.7% (8.3–21.6%)  | 252.9 (132.7–409)    | 131.9% (61.8 to 306.5%)  | 9.3% (4.9–14.4%)   | 8.7 (4.2–14.7)   | 121% (52.8 to 294.5%)    |
|                                            | Intracerebral haemorrhage               | 29.5% (17.9–40.8%) | 261.5 (139.2–419)    | -15.2% (-45 to 55.5%)    | 21.6% (12.5–31%)   | 7.8 (4.1–12.7)   | -18.6% (-46.6 to 47.8%)  |
|                                            | Subarachnoid haemorrhage                | 30.4% (18.6–42.4%) | 49.6 (21.9–93.2)     | -4.6% (-41.1 to 95%)     | 21.9% (12.5–32%)   | 1.4 (0.6–2.7)    | -10.2% (-44.9 to 84.9%)  |
|                                            | Neurological disorders*                 | 2.1% (0.5–5.5%)    | 27.7 (6.2–78.6)      | 64.4% (16.9 to 217.1%)   | 4.8% (1.4–11.1%)   | 1.7 (0.2–5.7)    | 62.2% (9.2 to 262.8%)    |
|                                            | Alzheimer's disease and other dementias | 7.2% (2.3–15.2%)   | 27.7 (6.2–78.6)      | 64.4% (16.9 to 217.1%)   | 6.5% (1.9–14.1%)   | 1.7 (0.2–5.7)    | 62.2% (9.2 to 262.8%)    |
| High fasting plasma glucose                | Stroke                                  | 22.7% (13.2–36.6%) | 626.9 (351–1071.4)   | 58.1% (6.2 to 130.7%)    | 24.1% (13.4–40%)   | 32.6 (17.2–59.1) | 57.4% (8 to 131.6%)      |
|                                            | Ischaemic stroke                        | 24.6% (11.8–47.4%) | 422.5 (193.6–847.8)  | 144% (69.9 to 245.1%)    | 24.9% (11.1–50%)   | 23.1 (9.9–51.6)  | 127.6% (57.1 to 224.2%)  |
|                                            | Intracerebral haemorrhage               | 19.7% (11.1–30.4%) | 174.2 (87.2–283)     | -10% (-39.8 to 37.8%)    | 22.5% (12.7–35.9%) | 8.1 (4–13.5)     | -11.9% (-41.8 to 32.7%)  |
|                                            | Subarachnoid haemorrhage                | 18.2% (10.4–28.6%) | 30.2 (12.2–61.9)     | 0.7% (-34.6 to 70.8%)    | 22% (12.1–36.6%)   | 1.4 (0.5–3.1)    | 1.4% (-35.1 to 75%)      |
|                                            | Neurological disorders*                 | 2.9% (0.5–8.3%)    | 37.6 (6.3–123.8)     | 57.5% (36.3 to 92.7%)    | 7.3% (1.5–16.6%)   | 2.5 (0.3–9.5)    | 58.7% (30.9 to 106.4%)   |

**Table S16** Regional and national disabilities and deaths related to neurological conditions attributable to risk factors in North Africa and Middle East countries

| Location<br>Risk factor (alphabetic order) | Cause                                   | DALYs (95% UI)     |                      |                          | Deaths (95% UI)    |                  |                          |
|--------------------------------------------|-----------------------------------------|--------------------|----------------------|--------------------------|--------------------|------------------|--------------------------|
|                                            |                                         | PAF (%)            | Rate per 100,000     | Rate change (%)          | PAF (%)            | Rate per 100,000 | Rate change (%)          |
|                                            |                                         | 2019               | 2019                 | From 1990 to 2019        | 2019               | 2019             | From 1990 to 2019        |
|                                            | Alzheimer's disease and other dementias | 9.8% (2.2–20.7%)   | 37.6 (6.3–123.8)     | 57.5% (36.3 to 92.7%)    | 9.8% (2.2–20.9%)   | 2.5 (0.3–9.5)    | 58.7% (30.9 to 106.4%)   |
| High LDL cholesterol                       | Stroke                                  | 14.4% (8.8–23.6%)  | 399.1 (221.3–709.5)  | 34.7% (4.7 to 80.1%)     | 13.4% (5.7–26.9%)  | 18.2 (7.1–40.1)  | 26.7% (-1.1 to 72.2%)    |
|                                            | Ischaemic stroke                        | 23.2% (14–38.1%)   | 399.1 (221.3–709.5)  | 34.7% (4.7 to 80.1%)     | 19.5% (8.3–39.2%)  | 18.2 (7.1–40.1)  | 26.7% (-1.1 to 72.2%)    |
| High systolic blood pressure               | Stroke                                  | 48.6% (40.3–56.3%) | 1344.8 (963–1816.7)  | -21.4% (-42 to 7.3%)     | 45.3% (35.8–54.7%) | 61.6 (42.7–85.1) | -21.4% (-41.3 to 8%)     |
|                                            | Ischaemic stroke                        | 46% (35.7–56.1%)   | 790.5 (544.1–1095.6) | 28.8% (-2.6 to 76.1%)    | 42.5% (31.4–54.2%) | 39.7 (26.2–56.8) | 22.2% (-8.9 to 68%)      |
|                                            | Intracerebral haemorrhage               | 53.1% (42.4–62.5%) | 469.9 (320.7–655.9)  | -50.4% (-64.5 to -29.3%) | 51.6% (40.6–62.2%) | 18.6 (12.3–26.1) | -53.2% (-66 to -33.3%)   |
|                                            | Subarachnoid haemorrhage                | 51.4% (40.5–61.1%) | 84.4 (43.5–144)      | -43.6% (-62.6 to -8.1%)  | 50.9% (40–61.8%)   | 3.3 (1.6–5.7)    | -46.1% (-64.1 to -12.1%) |
| High temperature                           | Stroke                                  | 3.2% (1.2–6.8%)    | 89.3 (29.1–188.2)    | -23% (-95.2 to 17%)      | 3.5% (1.3–7.3%)    | 4.8 (1.6–10.4)   | -18.5% (-94.9 to 22.6%)  |
|                                            | Ischaemic stroke                        | 3.1% (1.1–6.6%)    | 53.7 (17.7–111.9)    | 25.6% (-92.2 to 87.3%)   | 3.5% (1.3–7.3%)    | 3.3 (1.1–7.1)    | 21.4% (-92.5 to 75.4%)   |
|                                            | Intracerebral haemorrhage               | 3.4% (1.2–7.1%)    | 30.1 (9.7–62.4)      | -52% (-97 to -26.2%)     | 3.5% (1.3–7.3%)    | 1.3 (0.4–2.6)    | -53.7% (-97.1 to -28.9%) |
|                                            | Subarachnoid haemorrhage                | 3.3% (1.2–6.8%)    | 5.5 (1.4–12.4)       | -47.4% (-96.9 to -7.5%)  | 3.5% (1.3–7.3%)    | 0.2 (0.1–0.5)    | -46.3% (-96.5 to -8.4%)  |
| Household air pollution from solid fuels   | Meningitis                              | 0.6% (0.3–1%)      | 0.5 (0.2–1)          | -88.3% (-94.9 to -73.6%) | 0.3% (0.1–0.6%)    | <0.1 (<0.1–<0.1) | -88.3% (-95 to -73.6%)   |
|                                            | Encephalitis                            | 0.3% (0.1–0.6%)    | 0.1 (0–0.2)          | -58.3% (-85 to 10%)      | 0.2% (0.1–0.4%)    | <0.1 (<0.1–<0.1) | -58.3% (-85 to 10%)      |
|                                            | Stroke                                  | 15.5% (9.7–22.5%)  | 429.4 (244.7–650)    | -69.5% (-80 to -55.2%)   | 13.6% (8.6–19.7%)  | 18.5 (10.5–28.3) | -70.6% (-80.4 to -57.2%) |
|                                            | Ischaemic stroke                        | 14.9% (9.4–21.4%)  | 255.2 (147.6–392.9)  | -51.5% (-66.9 to -29%)   | 12.9% (8.1–18.7%)  | 12.1 (6.9–18.9)  | -56% (-70.3 to -35.5%)   |
|                                            | Intracerebral haemorrhage               | 16.6% (10.4–23.7%) | 147.1 (80.4–232.8)   | -80.6% (-87.9 to -69.7%) | 15% (9.4–21.7%)    | 5.4 (2.9–8.5)    | -82.3% (-88.7 to -73.2%) |
|                                            | Subarachnoid haemorrhage                | 16.6% (10–23.8%)   | 27.1 (11.8–49.2)     | -77.7% (-86.6 to -61.5%) | 15.1% (9.3–21.7%)  | 1 (0.4–1.8)      | -79.6% (-87.6 to -63.9%) |
| Kidney dysfunction                         | Stroke                                  | 9.4% (7.5–11.4%)   | 260.8 (184.9–351.9)  | 6.2% (-18.3 to 40.9%)    | 9.1% (6.4–11.8%)   | 12.4 (7.9–17.7)  | 7.6% (-17.8 to 43.9%)    |
|                                            | Ischaemic stroke                        | 10.7% (8.1–13.4%)  | 184.5 (124.8–258.6)  | 61.7% (26.3 to 109.8%)   | 9.5% (5.9–13.1%)   | 8.9 (5.1–13.4)   | 57.8% (20 to 107.1%)     |
|                                            | Intracerebral haemorrhage               | 8.6% (7–10.4%)     | 76.2 (53.3–104.4)    | -42% (-57.6 to -19.2%)   | 9.6% (7.4–11.8%)   | 3.5 (2.3–4.9)    | -40.8% (-55.4 to -18.9%) |
| Lead exposure                              | Stroke                                  | 10.9% (8.2–13.7%)  | 301.9 (197.4–425.5)  | -27.5% (-46 to -2.3%)    | 10.7% (8–13.7%)    | 14.5 (9.4–20.9)  | -18% (-37.9 to 10.2%)    |
|                                            | Ischaemic stroke                        | 10.4% (7.5–13.6%)  | 179.5 (116.5–262)    | 28.5% (-0.3 to 67.1%)    | 10% (6.9–13.5%)    | 9.4 (5.9–13.9)   | 36.8% (6.2 to 80%)       |
|                                            | Intracerebral haemorrhage               | 11.8% (8.4–15.4%)  | 104.4 (66–154.6)     | -56.5% (-68.4 to -39%)   | 12.1% (8.4–16.1%)  | 4.4 (2.7–6.6)    | -53.7% (-65.4 to -36.7%) |
|                                            | Subarachnoid haemorrhage                | 10.9% (7.4–14.5%)  | 18 (8.1–33.9)        | -51.2% (-66.5 to -22.7%) | 11.6% (7.8–15.8%)  | 0.7 (0.3–1.4)    | -46.8% (-62.8 to -14%)   |
| Low birth weight                           | Meningitis                              | 5% (2.9–8%)        | 4.8 (2.6–8.4)        | -72% (-86.5 to -43.9%)   | 2.8% (1.5–4.9%)    | 0.1 (0–0.1)      | -72% (-86.5 to -43.9%)   |
|                                            | Encephalitis                            | 2.2% (1.1–4.4%)    | 0.7 (0.3–1.2)        | -2% (-57.6 to 139.7%)    | 1.5% (0.7–2.9%)    | <0.1 (<0.1–<0.1) | -2% (-57.6 to 139.7%)    |
| Low birth weight and short gestation       | Meningitis                              | 5.1% (2.9–8.3%)    | 5 (2.7–8.6)          | -71.9% (-86.4 to -43.6%) | 2.9% (1.6–5.1%)    | 0.1 (0–0.1)      | -71.9% (-86.4 to -43.6%) |
|                                            | Encephalitis                            | 2.3% (1.1–4.5%)    | 0.7 (0.3–1.2)        | -2.1% (-57.5 to 138.7%)  | 1.5% (0.7–2.9%)    | <0.1 (<0.1–<0.1) | -2.1% (-57.5 to 138.7%)  |
| Low physical activity                      | Stroke                                  | 4.3% (0.9–10%)     | 117.4 (23.3–274.9)   | 21.4% (-4.2 to 54.6%)    | 5.6% (1.2–12.1%)   | 7.6 (1.7–16.8)   | 18.1% (-7.9 to 52%)      |
|                                            | Ischaemic stroke                        | 6.9% (1.4–16.2%)   | 117.4 (23.3–274.9)   | 21.4% (-4.2 to 54.6%)    | 8.2% (1.7–17.6%)   | 7.6 (1.7–16.8)   | 18.1% (-7.9 to 52%)      |
| Low temperature                            | Stroke                                  | 2.2% (-0.2–4.5%)   | 60.9 (-6.2–127.1)    | -35.9% (-71.3 to 14.8%)  | 2.4% (-0.2–4.9%)   | 3.3 (-0.3–6.8)   | -32% (-68.8 to 18.8%)    |
|                                            | Ischaemic stroke                        | 2.1% (-0.2–4.3%)   | 36.6 (-3.8–76.4)     | 5.1% (-53.1 to 82.5%)    | 2.4% (-0.2–4.9%)   | 2.3 (-0.2–4.7)   | 1.7% (-53.8 to 75.4%)    |

**Table S16** Regional and national disabilities and deaths related to neurological conditions attributable to risk factors in North Africa and Middle East countries

| Location<br>Risk factor (alphabetic order) | Cause                     | DALYs (95% UI)     |                        |                          | Deaths (95% UI)    |                  |                          |
|--------------------------------------------|---------------------------|--------------------|------------------------|--------------------------|--------------------|------------------|--------------------------|
|                                            |                           | PAF (%)            | Rate per 100,000       | Rate change (%)          | PAF (%)            | Rate per 100,000 | Rate change (%)          |
|                                            |                           | 2019               | 2019                   | From 1990 to 2019        | 2019               | 2019             | From 1990 to 2019        |
| Metabolic risk factors†                    | Intracerebral haemorrhage | 2.3% (-0.2–4.7%)   | 20.6 (-2.2–42.9)       | -60.1% (-81.5 to -27.3%) | 2.4% (-0.2–4.9%)   | 0.9 (-0.1–1.8)   | -61.5% (-81.4 to -31.3%) |
|                                            | Subarachnoid haemorrhage  | 2.3% (-0.2–4.6%)   | 3.8 (-0.4–9.2)         | -56.5% (-82.9 to -16.1%) | 2.4% (-0.2–4.9%)   | 0.2 (0–0.4)      | -55.6% (-80.6 to -13.8%) |
|                                            | Stroke                    | 68.2% (60.9–75.9%) | 1888.2 (1417.6–2465.6) | -13.1% (-33.4 to 16.9%)  | 65.5% (56.6–75.5%) | 89 (63.3–116.4)  | -12.1% (-32.3 to 18.3%)  |
|                                            | Ischaemic stroke          | 69.6% (60.3–79.6%) | 1195.1 (902.3–1589.5)  | 35.8% (5.6 to 77.2%)     | 65.4% (53.7–79.2%) | 61.1 (43.1–84.3) | 30.4% (1.1 to 74.1%)     |
|                                            | Intracerebral haemorrhage | 66.8% (58.1–74.3%) | 591.3 (422.6–800.2)    | -47.3% (-61.8 to -26.2%) | 66.4% (56.8–74.7%) | 23.9 (16.9–32.5) | -49.7% (-63.2 to -30%)   |
|                                            | Subarachnoid haemorrhage  | 62% (52.9–70.6%)   | 101.9 (52.5–171.8)     | -39.7% (-59.6 to -2.4%)  | 62.1% (51.8–72%)   | 4 (1.9–6.9)      | -41.9% (-61.3 to -5.1%)  |
|                                            | Neurological disorders*   | 4.8% (1.3–11.5%)   | 62.6 (16.8–171.3)      | 57.8% (28.2 to 116.2%)   | 11.7% (4–23%)      | 4 (0.6–13.3)     | 57.7% (21.2 to 127.1%)   |
| Non-optimal temperature                    | Stroke                    | 5.4% (2.1–8.4%)    | 148.1 (55.5–251.9)     | -28.7% (-65.5 to 23.8%)  | 5.9% (2.3–9.3%)    | 8 (2.9–13.2)     | -24.5% (-62.6 to 28.3%)  |
|                                            | Ischaemic stroke          | 5.2% (2–8.1%)      | 89.1 (33.2–148.4)      | 16.5% (-38.6 to 96.4%)   | 5.9% (2.3–9.3%)    | 5.5 (2–9.1)      | 12.7% (-43.3 to 87%)     |
|                                            | Intracerebral haemorrhage | 5.6% (2.2–8.9%)    | 49.9 (18.8–87.6)       | -55.6% (-79 to -19.9%)   | 5.9% (2.3–9.3%)    | 2.1 (0.8–3.6)    | -57.1% (-79.3 to -22.9%) |
| Other environmental risks                  | Subarachnoid haemorrhage  | 5.5% (2.2–8.6%)    | 9.1 (2.5–18.5)         | -51.5% (-76.5 to 0.2%)   | 5.9% (2.3–9.3%)    | 0.4 (0.1–0.8)    | -50.4% (-75.6 to 1.2%)   |
|                                            | Stroke                    | 10.9% (8.2–13.7%)  | 301.9 (197.4–425.5)    | -27.5% (-46 to -2.3%)    | 10.7% (8–13.7%)    | 14.5 (9.4–20.9)  | -18% (-37.9 to 10.2%)    |
|                                            | Ischaemic stroke          | 10.4% (7.5–13.6%)  | 179.5 (116.5–262)      | 28.5% (-0.3 to 67.1%)    | 10% (6.9–13.5%)    | 9.4 (5.9–13.9)   | 36.8% (6.2 to 80%)       |
|                                            | Intracerebral haemorrhage | 11.8% (8.4–15.4%)  | 104.4 (66–154.6)       | -56.5% (-68.4 to -39%)   | 12.1% (8.4–16.1%)  | 4.4 (2.7–6.6)    | -53.7% (-65.4 to -36.7%) |
| Particulate matter pollution               | Subarachnoid haemorrhage  | 10.9% (7.4–14.5%)  | 18 (8.1–33.9)          | -51.2% (-66.5 to -22.7%) | 11.6% (7.8–15.8%)  | 0.7 (0.3–1.4)    | -46.8% (-62.8 to -14%)   |
|                                            | Meningitis                | 1.1% (0.6–1.8%)    | 1.1 (0.6–1.8)          | -79.2% (-90.3 to -57.6%) | 0.6% (0.3–1.1%)    | <0.1 (<0.1–<0.1) | -79.2% (-90.3 to -57.6%) |
|                                            | Encephalitis              | 0.5% (0.2–1%)      | 0.1 (0.1–0.3)          | -25.9% (-71 to 86.7%)    | 0.3% (0.1–0.7%)    | <0.1 (<0.1–<0.1) | -25.9% (-71 to 86.8%)    |
| Secondhand smoke                           | Stroke                    | 33.7% (27.2–40.1%) | 934 (673.2–1267.3)     | -40.6% (-57.8 to -16.7%) | 29.6% (23.5–35.4%) | 40.2 (28.4–55.1) | -42.6% (-59.1 to -19.6%) |
|                                            | Ischaemic stroke          | 32.3% (25.9–38.6%) | 554.1 (404.3–754)      | -5.7% (-33.1 to 28.9%)   | 28.1% (22.2–33.8%) | 26.2 (18.6–36.9) | -14.1% (-40.4 to 20.8%)  |
|                                            | Intracerebral haemorrhage | 36.3% (29.5–42.8%) | 321.5 (221.6–445.2)    | -62.2% (-73.9 to -44.8%) | 32.8% (26.3–39.1%) | 11.8 (8.1–16.5)  | -65.4% (-76.1 to -50.1%) |
|                                            | Subarachnoid haemorrhage  | 35.6% (28.8–42.3%) | 58.5 (30.7–98.9)       | -56.9% (-71.7 to -28.7%) | 32.6% (26–39.2%)   | 2.1 (1–3.7)      | -60.3% (-74.3 to -32.8%) |
|                                            | Stroke                    | 4.5% (3.4–5.6%)    | 123.9 (82.1–177.5)     | -23% (-43.2 to 6%)       | 3.8% (2.9–4.8%)    | 5.2 (3.4–7.3)    | -22.2% (-40.6 to 4.1%)   |
|                                            | Ischaemic stroke          | 4.1% (3–5.1%)      | 70.2 (48.2–100.7)      | 30.5% (-1.4 to 73.9%)    | 3.5% (2.6–4.5%)    | 3.3 (2.2–4.8)    | 22.1% (-6.2 to 61.8%)    |
|                                            | Intracerebral haemorrhage | 5.1% (3.8–6.5%)    | 45.3 (29–66.5)         | -50.7% (-65.5 to -29%)   | 4.5% (3.3–5.6%)    | 1.6 (1–2.3)      | -53.1% (-65.9 to -33.8%) |
| Short gestation                            | Subarachnoid haemorrhage  | 5.2% (3.8–6.7%)    | 8.4 (4–14.6)           | -44.7% (-63.3 to -9.8%)  | 4.5% (3.4–5.8%)    | 0.3 (0.1–0.5)    | -47% (-63.5 to -12.8%)   |
|                                            | Meningitis                | 3.9% (2.3–6.3%)    | 3.8 (2.1–6.4)          | -70.5% (-85.5 to -39.9%) | 2.2% (1.2–3.9%)    | <0.1 (<0.1–0.1)  | -70.5% (-85.5 to -39.9%) |
|                                            | Encephalitis              | 1.7% (0.8–3.4%)    | 0.5 (0.3–0.9)          | 2.1% (-55.2 to 143.9%)   | 1.1% (0.5–2.3%)    | <0.1 (<0.1–<0.1) | 2.1% (-55.2 to 143.9%)   |
| Smoking                                    | Stroke                    | 18.1% (16.2–20.1%) | 500.7 (373.3–659.1)    | -30.2% (-49.1 to -1.4%)  | 13.8% (12.1–15.5%) | 18.7 (13.7–24.9) | -28.2% (-47.1 to -0.7%)  |
|                                            | Ischaemic stroke          | 16.5% (14.7–18.6%) | 283.9 (217.3–379.3)    | 20.2% (-11.4 to 66.1%)   | 12.2% (10.6–13.8%) | 11.3 (8.6–15.3)  | 19.8% (-12.2 to 67.2%)   |
|                                            | Intracerebral haemorrhage | 20.9% (18.7–23.4%) | 185.3 (131.8–254.1)    | -55.7% (-69.3 to -34%)   | 17.5% (15.3–19.8%) | 6.3 (4.5–8.6)    | -56.4% (-69.3 to -36%)   |
|                                            | Subarachnoid haemorrhage  | 19% (15.4–22.5%)   | 31.5 (15.4–56.1)       | -49.8% (-66.8 to -13.1%) | 16.3% (12.9–19.9%) | 1 (0.5–1.9)      | -50.8% (-67.4 to -15.5%) |



**Table S16** Regional and national disabilities and deaths related to neurological conditions attributable to risk factors in North Africa and Middle East countries

| Location<br>Risk factor (alphabetic order) |                                         | DALYs (95% UI)       |                        |                          | Deaths (95% UI)     |                      |                          |
|--------------------------------------------|-----------------------------------------|----------------------|------------------------|--------------------------|---------------------|----------------------|--------------------------|
|                                            |                                         | PAF (%)              | Rate per 100,000       | Rate change (%)          | PAF (%)             | Rate per 100,000     | Rate change (%)          |
| Cause                                      |                                         | 2019                 | 2019                   | From 1990 to 2019        | 2019                | 2019                 | From 1990 to 2019        |
| Tobacco                                    | Neurological disorders*                 | 4.8% (1.7–10.2%)     | 63.2 (20.3–160.5)      | 11.1% (-12 to 37.7%)     | 10% (3.3–16.9%)     | 3.6 (0.4–11.2)       | 18.1% (-15.3 to 58.7%)   |
|                                            | Alzheimer's disease and other dementias | 18.1% (11.5–24.6%)   | 69.5 (26.8–167.5)      | 10.5% (-12.5 to 38.1%)   | 15.5% (9.6–21.8%)   | 4 (0.8–11.5)         | 18.1% (-11.2 to 55.7%)   |
|                                            | Parkinson's disease                     | -10.8% (-15.6–-5.9%) | -8.3 (-13–-4.4)        | 7.2% (-23.8 to 55.5%)    | -9.6% (-14.2–-5.3%) | -0.4 (-0.7–0.2)      | 18% (-16.8 to 74.9%)     |
|                                            | Multiple sclerosis                      | 14.3% (10.2–18.6%)   | 2 (1.2–2.9)            | 16.6% (-22.8 to 68%)     | 15.2% (10.4–20.8%)  | <0.1 (<0.1–0.1)      | 17% (-37.2 to 102%)      |
|                                            | Stroke                                  | 21.7% (19.5–23.9%)   | 599.8 (453.7–789.6)    | -28.9% (-47.3 to -1%)    | 17% (15.2–18.8%)    | 23 (17.3–30.3)       | -27% (-45.2 to -0.2%)    |
|                                            | Ischaemic stroke                        | 19.9% (17.9–21.9%)   | 341.1 (265.7–450.1)    | 21.7% (-9 to 65.4%)      | 15.2% (13.4–17%)    | 14.2 (10.8–19)       | 20% (-9.4 to 64.4%)      |
|                                            | Intracerebral haemorrhage               | 24.9% (22.4–27.6%)   | 220.6 (158.3–303.8)    | -54.9% (-68.3 to -33.9%) | 21% (18.7–23.5%)    | 7.6 (5.5–10.4)       | -55.8% (-68.7 to -36.3%) |
|                                            | Subarachnoid haemorrhage                | 23.1% (19.7–26.4%)   | 38.1 (19–66.9)         | -48.9% (-65.7 to -13.1%) | 20% (16.7–23.5%)    | 1.3 (0.6–2.3)        | -50.1% (-66.4 to -15.4%) |
|                                            | Neurological disorders*                 | 4.8% (1.7–10.2%)     | 63.2 (20.3–160.5)      | 11.1% (-12 to 37.7%)     | 10% (3.3–16.9%)     | 3.6 (0.4–11.2)       | 18.1% (-15.3 to 58.7%)   |
|                                            | Alzheimer's disease and other dementias | 18.1% (11.5–24.6%)   | 69.5 (26.8–167.5)      | 10.5% (-12.5 to 38.1%)   | 15.5% (9.6–21.8%)   | 4 (0.8–11.5)         | 18.1% (-11.2 to 55.7%)   |
| Parkinson's disease                        | -10.8% (-15.6–-5.9%)                    | -8.3 (-13–-4.4)      | 7.2% (-23.8 to 55.5%)  | -9.6% (-14.2–-5.3%)      | -0.4 (-0.7–0.2)     | 18% (-16.8 to 74.9%) |                          |
| Multiple sclerosis                         | 14.3% (10.2–18.6%)                      | 2 (1.2–2.9)          | 16.6% (-22.8 to 68%)   | 15.2% (10.4–20.8%)       | <0.1 (<0.1–0.1)     | 17% (-37.2 to 102%)  |                          |
| <b>Afghanistan</b>                         |                                         |                      |                        |                          |                     |                      |                          |
| Air pollution                              | Meningitis                              | 1.6% (0.8–2.8%)      | 3.9 (1.8–7)            | -80.3% (-91.4 to -52.2%) | 1% (0.5–1.9%)       | <0.1 (<0.1–0.1)      | -80.3% (-91.4 to -52.2%) |
|                                            | Encephalitis                            | 0.3% (0.1–0.7%)      | 0.6 (0.2–1.5)          | -25.9% (-70.4 to 85.9%)  | 0.1% (0–0.4%)       | <0.1 (<0.1–<0.1)     | -25.9% (-70.4 to 85.9%)  |
|                                            | Stroke                                  | 42% (38.1–46%)       | 1470.1 (1038.2–1910.8) | -32.2% (-49 to -12.5%)   | 37.3% (33.3–41.7%)  | 60.3 (41–79.3)       | -32.7% (-49.3 to -13.8%) |
|                                            | Ischaemic stroke                        | 39.8% (35.8–44.1%)   | 742.3 (545.1–990.3)    | 11% (-15.9 to 44.3%)     | 35.2% (31.3–40%)    | 34.5 (24–47.2)       | 2.7% (-23.3 to 36.4%)    |
|                                            | Intracerebral haemorrhage               | 44.7% (40.6–48.7%)   | 625.2 (435.8–839.5)    | -51.8% (-64.5 to -35.1%) | 40.7% (36.7–44.9%)  | 22 (14.8–29.6)       | -54.4% (-66.3 to -39.4%) |
|                                            | Subarachnoid haemorrhage                | 43.9% (39.4–48.8%)   | 102.7 (33.5–177.9)     | -49.5% (-65.4 to -19.4%) | 40% (35.2–45.1%)    | 3.7 (1.1–6.8)        | -51% (-65.6 to -22%)     |
| Alcohol use                                | Stroke                                  | 0% (-0.1–0.1%)       | 0.9 (-2.1–4.5)         |                          | 0% (-0.1–0.1%)      | 0 (-0.1–0.1)         |                          |
|                                            | Ischaemic stroke                        | -0.1% (-0.2–0%)      | -1.4 (-3–0.3)          |                          | -0.1% (-0.1–0%)     | -0.1 (-0.1–0)        |                          |
|                                            | Intracerebral haemorrhage               | 0.2% (0–0.4%)        | 2.2 (-0.1–5.3)         |                          | 0.1% (0–0.3%)       | 0.1 (0–0.2)          |                          |
|                                            | Neurological disorders*                 | 0% (0–0.1%)          | 0.7 (0.2–1.5)          |                          | 0% (0–0.1%)         | <0.1 (<0.1–<0.1)     |                          |
| All risk factors                           | Idiopathic epilepsy                     | 0.3% (0.1–0.6%)      | 0.7 (0.2–1.5)          |                          | 0.4% (0.1–0.7%)     | <0.1 (<0.1–<0.1)     |                          |
|                                            | Meningitis                              | 6.2% (3.1–10.9%)     | 15 (7.3–26.9)          | -75.9% (-89.3 to -45%)   | 4% (1.9–7.4%)       | 0.2 (0.1–0.3)        | -75.9% (-89.3 to -45%)   |
|                                            | Encephalitis                            | 1.2% (0.5–2.4%)      | 2.2 (0.9–5.4)          | -10.7% (-63.1 to 115.8%) | 0.5% (0.2–1.4%)     | <0.1 (<0.1–0.1)      | -10.7% (-63.1 to 115.8%) |
|                                            | Stroke                                  | 89.6% (86.8–92.3%)   | 3136.6 (2253.2–4043.7) | -19.9% (-38.2 to -0.9%)  | 87.8% (84–91.9%)    | 141.8 (97.3–183.1)   | -17.4% (-35.5 to 0.5%)   |
|                                            | Ischaemic stroke                        | 89.7% (85.8–94%)     | 1673 (1224.9–2198.8)   | 30.2% (1 to 63.5%)       | 87.4% (82–93.8%)    | 85.6 (59.5–112.3)    | 25.5% (-1.9 to 59.5%)    |
|                                            | Intracerebral haemorrhage               | 90% (86.9–92.6%)     | 1257.5 (885.1–1689.8)  | -44.8% (-58.8 to -27.1%) | 88.8% (85–92.3%)    | 48 (32.7–64.2)       | -46.3% (-59.1 to -31.7%) |
|                                            | Subarachnoid haemorrhage                | 87.8% (83.8–91%)     | 206.1 (67.4–351.9)     | -41.9% (-59 to -10.3%)   | 86.8% (81.7–91.2%)  | 8.2 (2.4–14.6)       | -41.8% (-58.3 to -9.9%)  |
|                                            | Neurological disorders*                 | 8.8% (3.2–19.1%)     | 133.2 (42.1–359.3)     | 46.6% (23.8 to 77.7%)    | 20.2% (8.2–34.5%)   | 9.1 (1.6–28.9)       | 47.2% (21.6 to 86.2%)    |



**Table S16** Regional and national disabilities and deaths related to neurological conditions attributable to risk factors in North Africa and Middle East countries

| Location<br>Risk factor (alphabetic order) |                                         | DALYs (95% UI)     |                       |                          | Deaths (95% UI)    |                  |                          |
|--------------------------------------------|-----------------------------------------|--------------------|-----------------------|--------------------------|--------------------|------------------|--------------------------|
|                                            |                                         | PAF (%)            | Rate per 100,000      | Rate change (%)          | PAF (%)            | Rate per 100,000 | Rate change (%)          |
| Cause                                      |                                         | 2019               | 2019                  | From 1990 to 2019        | 2019               | 2019             | From 1990 to 2019        |
| Ambient particulate matter pollution       | Alzheimer's disease and other dementias | 31.3% (18.4–46.8%) | 135.9 (44.8–362.4)    | 44% (21.6 to 72.4%)      | 30.1% (17.5–45.5%) | 9.3 (1.9–29.1)   | 45.7% (19.4 to 78.2%)    |
|                                            | Parkinson's disease                     | -4.4% (-6.9–2.3%)  | -5 (-8–2.6)           | 14.4% (-18.8 to 57.9%)   | -4.3% (-6.7–2.2%)  | -0.3 (-0.5–0.1)  | 13.7% (-19.6 to 56.4%)   |
|                                            | Idiopathic epilepsy                     | 0.3% (0.1–0.6%)    | 0.7 (0.2–1.5)         |                          | 0.4% (0.1–0.7%)    | <0.1 (<0.1–<0.1) |                          |
|                                            | Multiple sclerosis                      | 6.2% (3.9–9.2%)    | 1.7 (0.9–2.8)         | 81.4% (26.4 to 153.6%)   | 6.5% (3.6–10.3%)   | <0.1 (<0.1–0.1)  | 60.9% (6.4 to 147.9%)    |
|                                            | Meningitis                              | 0.3% (0.1–0.8%)    | 0.8 (0.3–1.8)         | -36.6% (-76.3 to 111%)   | 0.2% (0.1–0.5%)    | <0.1 (<0.1–<0.1) | -36.6% (-76.3 to 111%)   |
|                                            | Encephalitis                            | 0.1% (0–0.2%)      | 0.1 (0–0.4)           | 137.8% (-14.5 to 803.9%) | 0% (0–0.1%)        | <0.1 (<0.1–<0.1) | 137.8% (-14.5 to 803.9%) |
|                                            | Stroke                                  | 10% (4.5–17.6%)    | 350.1 (150.6–677.2)   | 112.6% (15.3 to 436.2%)  | 8.9% (4–15.8%)     | 14.4 (6.3–28)    | 110.7% (13.9 to 416.7%)  |
|                                            | Ischaemic stroke                        | 9.5% (4.3–16.9%)   | 176.8 (78.6–336.7)    | 245.9% (88.7 to 750.7%)  | 8.4% (3.8–14.9%)   | 8.2 (3.6–16.1)   | 222% (80.9 to 682.2%)    |
|                                            | Intracerebral haemorrhage               | 10.6% (4.7–18.9%)  | 148.9 (61.4–288.6)    | 51.4% (-19.2 to 285.2%)  | 9.7% (4.4–17.3%)   | 5.2 (2.2–10.2)   | 42.2% (-23.4 to 255.5%)  |
|                                            | Subarachnoid haemorrhage                | 10.3% (4.5–18.4%)  | 24.4 (6.4–58.4)       | 60.1% (-14.9 to 360.2%)  | 9.4% (4.1–16.7%)   | 0.9 (0.2–2.3)    | 54.1% (-18.2 to 340%)    |
| Behavioural risk factors‡                  | Meningitis                              | 5.9% (3–10.4%)     | 14.3 (7.1–25.7)       | -75.4% (-89 to -43.5%)   | 3.8% (1.8–7.1%)    | 0.2 (0.1–0.3)    | -75.4% (-89 to -43.5%)   |
|                                            | Encephalitis                            | 1.1% (0.5–2.3%)    | 2.1 (0.8–5.2)         | -9.4% (-62.7 to 119.3%)  | 0.5% (0.2–1.3%)    | <0.1 (<0.1–0.1)  | -9.4% (-62.7 to 119.3%)  |
|                                            | Stroke                                  | 40% (34–45.9%)     | 1397.9 (987.5–1914.4) | -16.1% (-36.2 to 6%)     | 35.8% (29.7–41.3%) | 57.7 (38.9–80.1) | -13.6% (-32.9 to 6.9%)   |
|                                            | Ischaemic stroke                        | 39.8% (32.4–47.7%) | 742.2 (520–1028)      | 37% (4.9 to 73%)         | 35.8% (28.4–44%)   | 35.1 (23.3–50.2) | 30.6% (0.9 to 65.5%)     |
|                                            | Intracerebral haemorrhage               | 40.4% (32.4–48%)   | 563.9 (383–790.5)     | -42% (-57.2 to -22.8%)   | 35.9% (28.5–43.2%) | 19.4 (12.9–27.4) | -43.9% (-57.8 to -27.4%) |
|                                            | Subarachnoid haemorrhage                | 39.1% (30.7–46.9%) | 91.8 (31.1–166.6)     | -39.8% (-59.3 to -5.1%)  | 34.7% (26.8–42.2%) | 3.3 (1–6.1)      | -40.1% (-58 to -5.7%)    |
|                                            | Neurological disorders*                 | 2.5% (0.8–5.3%)    | 37.2 (10.8–97.4)      | 24.9% (-4.9 to 62.3%)    | 5.1% (1.5–9%)      | 2.4 (0.3–7.6)    | 23% (-10.3 to 69.4%)     |
|                                            | Alzheimer's disease and other dementias | 9.2% (5.6–13.3%)   | 39.9 (13.7–101.3)     | 19.9% (-8.2 to 51.3%)    | 8.4% (5–12.3%)     | 2.6 (0.5–7.8)    | 21.2% (-9.2 to 57%)      |
|                                            | Parkinson's disease                     | -4.4% (-6.9–2.3%)  | -5 (-8–2.6)           | 14.4% (-18.8 to 57.9%)   | -4.3% (-6.7–2.2%)  | -0.3 (-0.5–0.1)  | 13.7% (-19.6 to 56.4%)   |
|                                            | Idiopathic epilepsy                     | 0.3% (0.1–0.6%)    | 0.7 (0.2–1.5)         |                          | 0.4% (0.1–0.7%)    | <0.1 (<0.1–<0.1) |                          |
| Child and maternal malnutrition            | Multiple sclerosis                      | 6.2% (3.9–9.2%)    | 1.7 (0.9–2.8)         | 81.4% (26.4 to 153.6%)   | 6.5% (3.6–10.3%)   | <0.1 (<0.1–0.1)  | 60.9% (6.4 to 147.9%)    |
|                                            | Meningitis                              | 5.9% (3–10.4%)     | 14.3 (7.1–25.7)       | -75.4% (-89 to -43.5%)   | 3.8% (1.8–7.1%)    | 0.2 (0.1–0.3)    | -75.4% (-89 to -43.5%)   |
|                                            | Encephalitis                            | 1.1% (0.5–2.3%)    | 2.1 (0.8–5.2)         | -9.4% (-62.7 to 119.3%)  | 0.5% (0.2–1.3%)    | <0.1 (<0.1–0.1)  | -9.4% (-62.7 to 119.3%)  |
| Diet high in red meat                      | Stroke                                  | 4.7% (1.8–7.1%)    | 163.1 (59.8–276.1)    | -48.6% (-68.2 to -24.9%) | 3.6% (1.4–5.5%)    | 5.8 (2.1–9.8)    | -47% (-66.6 to -23.8%)   |
|                                            | Ischaemic stroke                        | 4% (0.6–6.2%)      | 74 (11.4–133.5)       | -7.1% (-47.8 to 26%)     | 2.9% (0.5–4.6%)    | 2.9 (0.5–5.3)    | -8.3% (-43 to 22.3%)     |
|                                            | Intracerebral haemorrhage               | 5.5% (0.8–8.8%)    | 76.6 (10.9–142.2)     | -62.7% (-81.6 to -46.2%) | 4.6% (0.7–7.4%)    | 2.5 (0.4–4.6)    | -63.1% (-80.4 to -48.9%) |
| Diet high in sodium                        | Subarachnoid haemorrhage                | 5.4% (0.9–8.9%)    | 12.5 (1.5–28.1)       | -61.5% (-81.1 to -38%)   | 4.4% (0.7–7.5%)    | 0.4 (0–1)        | -60.9% (-79.2 to -37%)   |
|                                            | Stroke                                  | 1.9% (0.3–7.5%)    | 65.6 (8–274.6)        | -24.6% (-55.7 to 55%)    | 1.6% (0.3–6.4%)    | 2.6 (0.4–10.8)   | -24.4% (-54 to 53.5%)    |
|                                            | Ischaemic stroke                        | 1.7% (0.3–6.7%)    | 31.2 (4.3–127.9)      | 26% (-26.8 to 148%)      | 1.4% (0.3–5.6%)    | 1.4 (0.2–5.7)    | 21.4% (-28.5 to 143.3%)  |
|                                            | Intracerebral haemorrhage               | 2.1% (0.2–8.7%)    | 29.7 (3.2–124.7)      | -45% (-70 to 9.9%)       | 1.9% (0.3–7.9%)    | 1 (0.1–4.4)      | -47.7% (-69.7 to 6.5%)   |
|                                            | Subarachnoid haemorrhage                | 2% (0.2–8.1%)      | 4.7 (0.4–22.2)        | -42.8% (-68.5 to 27.6%)  | 1.8% (0.3–7.4%)    | 0.2 (0–0.9)      | -44.8% (-68.5 to 29%)    |

**Table S16** Regional and national disabilities and deaths related to neurological conditions attributable to risk factors in North Africa and Middle East countries

| Location<br>Risk factor (alphabetic order) | Cause                                   | DALYs (95% UI)     |                        |                          | Deaths (95% UI)    |                   |                          |
|--------------------------------------------|-----------------------------------------|--------------------|------------------------|--------------------------|--------------------|-------------------|--------------------------|
|                                            |                                         | PAF (%)            | Rate per 100,000       | Rate change (%)          | PAF (%)            | Rate per 100,000  | Rate change (%)          |
|                                            |                                         | 2019               | 2019                   | From 1990 to 2019        | 2019               | 2019              | From 1990 to 2019        |
| Diet low in fibre                          | Stroke                                  | 6.7% (1.7–11.3%)   | 236.5 (59–429)         | 17.7% (-13.6 to 76%)     | 5.6% (1.5–9.3%)    | 9 (2.2–16.5)      | 16.7% (-11.9 to 68.4%)   |
|                                            | Ischaemic stroke                        | 6.2% (1.6–10.5%)   | 116.4 (29.1–206.7)     | 102.1% (49.4 to 195.1%)  | 5% (1.3–8.4%)      | 4.9 (1.3–8.9)     | 84.3% (38.7 to 162.1%)   |
|                                            | Intracerebral haemorrhage               | 7.4% (1.8–12.3%)   | 102.9 (24.2–185.1)     | -16.6% (-40.5 to 30.2%)  | 6.4% (1.6–10.9%)   | 3.5 (0.8–6.3)     | -20% (-41.9 to 21.5%)    |
|                                            | Subarachnoid haemorrhage                | 7.3% (1.8–12.1%)   | 17.2 (3.2–38.8)        | -13.5% (-43 to 49.7%)    | 6.4% (1.6–10.6%)   | 0.6 (0.1–1.4)     | -14.4% (-40.9 to 49%)    |
| Diet low in fruits                         | Stroke                                  | 8.8% (4.9–13.5%)   | 306.1 (156.6–499.8)    | -30.8% (-49.8 to -4.2%)  | 7% (3.8–10.7%)     | 11.3 (5.6–19)     | -29.8% (-49.7 to -3.6%)  |
|                                            | Ischaemic stroke                        | 6.3% (1.5–11.6%)   | 117.2 (28.5–232.5)     | 31.6% (0.5 to 67.4%)     | 5% (1.3–9.3%)      | 4.9 (1.2–9.8)     | 26.1% (-2.9 to 59.4%)    |
|                                            | Intracerebral haemorrhage               | 11.6% (5.9–19.5%)  | 162.1 (79–291.5)       | -46.8% (-60.9 to -28.7%) | 10.1% (5.2–17.2%)  | 5.5 (2.6–9.9)     | -48.1% (-61 to -32.2%)   |
|                                            | Subarachnoid haemorrhage                | 11.5% (5.6–19.4%)  | 26.8 (8.2–60.5)        | -44.5% (-62.1 to -13%)   | 10% (4.9–17.1%)    | 0.9 (0.3–2.2)     | -44.4% (-60.4 to -12.6%) |
| Diet low in vegetables                     | Stroke                                  | 7.4% (3.3–11%)     | 257.1 (113.1–415.5)    | -30.5% (-50 to -3.2%)    | 5.9% (2.7–8.9%)    | 9.6 (4.2–15.5)    | -29.9% (-48.8 to -4%)    |
|                                            | Ischaemic stroke                        | 4.9% (1.8–6%)      | 90.3 (19.3–167.4)      | 34.3% (1.8 to 68.6%)     | 3.9% (0.8–6.9%)    | 3.8 (0.8–7.1)     | 28.5% (-1.4 to 61.4%)    |
|                                            | Intracerebral haemorrhage               | 10.2% (3.3–16.9%)  | 143.2 (42.3–254.5)     | -45.2% (-59.7 to -27.3%) | 9.1% (2.9–15.1%)   | 4.9 (1.5–8.8)     | -46.7% (-60.1 to -30.5%) |
|                                            | Subarachnoid haemorrhage                | 10.1% (3.4–16.4%)  | 23.6 (5.2–52)          | -42.8% (-60.6 to -10.6%) | 8.9% (3–14.5%)     | 0.8 (0.2–1.9)     | -42.8% (-59.3 to -10.8%) |
| Diet low in whole grains                   | Stroke                                  | 5.3% (3–7%)        | 186.8 (96.5–282.6)     | 30% (-0.4 to 63.2%)      | 5.4% (3.2–6.9%)    | 8.7 (4.7–12.7)    | 24.5% (-3.7 to 56.8%)    |
|                                            | Ischaemic stroke                        | 10% (5.6–13%)      | 186.8 (96.5–282.6)     | 30% (-0.4 to 63.2%)      | 8.9% (5.3–11.2%)   | 8.7 (4.7–12.7)    | 24.5% (-3.7 to 56.8%)    |
| Dietary risks                              | Stroke                                  | 29.7% (23.3–36.2%) | 1038.6 (707.8–1452.7)  | -22.3% (-41.5 to -1.1%)  | 25.6% (20–31.3%)   | 41.4 (27.5–59.4)  | -20.1% (-38.9 to -0.5%)  |
|                                            | Ischaemic stroke                        | 28.2% (21–35.3%)   | 526.1 (347.1–764.9)    | 32.5% (0.3 to 68%)       | 24.1% (18–30.1%)   | 23.6 (15–34.8)    | 27.2% (-2.1 to 61.7%)    |
|                                            | Intracerebral haemorrhage               | 31.5% (22.6–40.2%) | 440 (275.5–646.6)      | -45.8% (-59.9 to -27.4%) | 28.1% (19.9–36.3%) | 15.2 (9.4–22.6)   | -47% (-60 to -31.5%)     |
|                                            | Subarachnoid haemorrhage                | 31% (21.7–39.7%)   | 72.5 (24.2–136.8)      | -43.3% (-61.6 to -11.5%) | 27.6% (19.1–35.7%) | 2.6 (0.7–5)       | -43.1% (-60.2 to -10.4%) |
| Environmental/occupational risk factors§   | Meningitis                              | 1.6% (0.8–2.8%)    | 3.9 (1.8–7)            | -80.3% (-91.4 to -52.2%) | 1% (0.5–1.9%)      | <0.1 (<0.1–0.1)   | -80.3% (-91.4 to -52.2%) |
|                                            | Encephalitis                            | 0.3% (0.1–0.7%)    | 0.6 (0.2–1.5)          | -25.9% (-70.4 to 85.9%)  | 0.1% (0–0.4%)      | <0.1 (<0.1–<0.1)  | -25.9% (-70.4 to 85.9%)  |
|                                            | Stroke                                  | 53.8% (50.1–57.6%) | 1883.8 (1350.2–2440.1) | -28.1% (-45.5 to -8.6%)  | 50.3% (46.4–54.6%) | 81.2 (56.2–104.8) | -26.5% (-43.8 to -8.3%)  |
|                                            | Ischaemic stroke                        | 51.5% (47.4–55.6%) | 961.2 (701.7–1279.2)   | 18.7% (-9.6 to 51.7%)    | 48.1% (43.8–52.6%) | 47.2 (32.8–62.7)  | 12.9% (-13.4 to 46.3%)   |
|                                            | Intracerebral haemorrhage               | 56.7% (52.9–60.6%) | 792.1 (552.7–1058.9)   | -49.3% (-62.3 to -32.2%) | 53.8% (50–58.2%)   | 29.1 (20–39)      | -51% (-63.5 to -35.7%)   |
|                                            | Subarachnoid haemorrhage                | 55.6% (51.4–60.1%) | 130.5 (41.7–225.6)     | -46.9% (-63.1 to -17%)   | 53% (48.4–57.9%)   | 5 (1.5–9)         | -47.1% (-62.2 to -17.3%) |
| High body-mass index                       | Stroke                                  | 29.5% (19.9–39.1%) | 1033 (612.1–1572.6)    | 7.2% (-22.8 to 59.5%)    | 20.6% (13.4–28.1%) | 33.3 (18.7–51.1)  | 12.9% (-19.6 to 69.6%)   |
|                                            | Ischaemic stroke                        | 21.3% (13.6–29.2%) | 396.2 (228.5–604.8)    | 117.7% (54.2 to 231.9%)  | 14.4% (8.8–20.6%)  | 14.1 (7.6–22.4)   | 119.7% (52.7 to 246.6%)  |
|                                            | Intracerebral haemorrhage               | 39.2% (26.6–51.8%) | 547.9 (329.8–836.8)    | -18.8% (-43.6 to 26.3%)  | 30.6% (20.1–41.8%) | 16.5 (9.5–25.5)   | -17.2% (-43.1 to 29.1%)  |
|                                            | Subarachnoid haemorrhage                | 38.4% (25–52%)     | 88.9 (30.4–167)        | -16.9% (-45.9 to 39.7%)  | 29.2% (17.7–42%)   | 2.7 (0.9–5.1)     | -14.4% (-43.9 to 46.9%)  |
|                                            | Neurological disorders*                 | 3.3% (0.9–7.9%)    | 49.9 (12.6–130.2)      | 67.8% (26 to 184.2%)     | 7.5% (2.5–15.5%)   | 3.3 (0.5–10.4)    | 69.3% (21.9 to 212.5%)   |
|                                            | Alzheimer's disease and other dementias | 11.5% (4.5–21.7%)  | 49.9 (12.6–130.2)      | 67.8% (26 to 184.2%)     | 10.8% (4.1–20.7%)  | 3.3 (0.5–10.4)    | 69.3% (21.9 to 212.5%)   |
| High fasting plasma glucose                | Stroke                                  | 32.8% (22.2–47.9%) | 1146.7 (695.3–1821.3)  | 46.5% (1.9 to 107%)      | 33.3% (20.7–54.2%) | 53.8 (30.1–91.9)  | 41.7% (0.9 to 100.2%)    |
|                                            | Ischaemic stroke                        | 34.6% (18.3–61.4%) | 645.4 (332.7–1187.7)   | 118.4% (56.6 to 211.1%)  | 33.9% (17–67.9%)   | 33.2 (15.5–67.4)  | 103.2% (45.4 to 189.4%)  |

**Table S16** Regional and national disabilities and deaths related to neurological conditions attributable to risk factors in North Africa and Middle East countries

| Location<br>Risk factor (alphabetic order) | Cause                                   | DALYs (95% UI)     |                        |                           | Deaths (95% UI)    |                   |                          |
|--------------------------------------------|-----------------------------------------|--------------------|------------------------|---------------------------|--------------------|-------------------|--------------------------|
|                                            |                                         | PAF (%)            | Rate per 100,000       | Rate change (%)           | PAF (%)            | Rate per 100,000  | Rate change (%)          |
|                                            |                                         | 2019               | 2019                   | From 1990 to 2019         | 2019               | 2019              | From 1990 to 2019        |
|                                            | Intracerebral haemorrhage               | 30.9% (18.8–44.3%) | 430.9 (233.2–680.3)    | 2.4% (-28.5 to 50%)       | 32.6% (20.3–47.1%) | 17.6 (9.8–28.3)   | -5.7% (-33.2 to 34.6%)   |
|                                            | Subarachnoid haemorrhage                | 29.8% (17.9–43.7%) | 70.4 (21–143.1)        | 6.6% (-30.4 to 81.1%)     | 31.9% (19.7–48.7%) | 3 (0.8–6.3)       | 0.8% (-32.6 to 71.1%)    |
|                                            | Neurological disorders*                 | 4.1% (0.7–11.4%)   | 62.4 (10.9–199.4)      | 62.9% (42.7 to 91.9%)     | 10% (2.1–22.4%)    | 4.4 (0.5–15.6)    | 62.9% (39.2 to 95.8%)    |
|                                            | Alzheimer's disease and other dementias | 14.4% (3.6–29.7%)  | 62.4 (10.9–199.4)      | 62.9% (42.7 to 91.9%)     | 14.3% (3.6–29.5%)  | 4.4 (0.5–15.6)    | 62.9% (39.2 to 95.8%)    |
| High LDL cholesterol                       | Stroke                                  | 13.2% (8.3–20.4%)  | 461.2 (265.1–763.5)    | 41.3% (8.1 to 83.8%)      | 12.2% (5.6–23.8%)  | 19.8 (7.8–40.4)   | 34.3% (4.5 to 75.6%)     |
|                                            | Ischaemic stroke                        | 24.8% (15.5–38.5%) | 461.2 (265.1–763.5)    | 41.3% (8.1 to 83.8%)      | 20.2% (9.1–39%)    | 19.8 (7.8–40.4)   | 34.3% (4.5 to 75.6%)     |
| High systolic blood pressure               | Stroke                                  | 50.2% (41.7–58.3%) | 1759.3 (1176.5–2416.6) | -21.2% (-42.2 to 3.7%)    | 47.1% (38.6–55.1%) | 76.2 (49.3–106.5) | -19.2% (-40.8 to 5.3%)   |
|                                            | Ischaemic stroke                        | 46.7% (36.2–56.3%) | 872.5 (577–1229.5)     | 32.6% (-2 to 71.2%)       | 43.5% (32.8–54.8%) | 42.7 (27–61.9)    | 28.1% (-5.7 to 68.6%)    |
| High temperature                           | Intracerebral haemorrhage               | 54.5% (43.3–63.8%) | 761.9 (490.6–1065)     | -44.1% (-60.3 to -23.8%)  | 52.8% (41.9–63.5%) | 28.6 (17.6–40.5)  | -45.7% (-60 to -27.5%)   |
|                                            | Subarachnoid haemorrhage                | 53.2% (42.2–63.7%) | 124.9 (42.1–222.3)     | -41.1% (-60.5 to -6.2%)   | 52% (40.4–63.4%)   | 4.9 (1.4–9)       | -41% (-58.7 to -5.7%)    |
|                                            | Stroke                                  | 0.6% (-0.1–1.6%)   | 20.5 (-3.1–54.7)       | -25.3% (-193.2 to 101.4%) | 0.6% (-0.1–1.7%)   | 1 (-0.2–2.8)      | -20.9% (-197.5 to 113%)  |
|                                            | Ischaemic stroke                        | 0.6% (-0.1–1.5%)   | 10.6 (-1.6–28.8)       | 25.2% (-256.7 to 247.1%)  | 0.6% (-0.1–1.7%)   | 0.6 (-0.1–1.7)    | 20.3% (-249.2 to 217.9%) |
| Household air pollution from solid fuels   | Intracerebral haemorrhage               | 0.6% (-0.1–1.6%)   | 8.5 (-1.2–23)          | -48% (-165.8 to 39.6%)    | 0.6% (-0.1–1.7%)   | 0.3 (0–0.9)       | -48.8% (-164 to 38.9%)   |
|                                            | Subarachnoid haemorrhage                | 0.6% (-0.1–1.6%)   | 1.4 (-0.2–4.3)         | -46.4% (-167.4 to 50.1%)  | 0.6% (-0.1–1.7%)   | 0.1 (0–0.2)       | -44.5% (-170.8 to 54.8%) |
|                                            | Meningitis                              | 1.3% (0.6–2.3%)    | 3.1 (1.4–5.7)          | -83.3% (-92.9 to -59.4%)  | 0.8% (0.4–1.6%)    | <0.1 (<0.1–0.1)   | -83.3% (-92.9 to -59.4%) |
|                                            | Encephalitis                            | 0.2% (0.1–0.5%)    | 0.4 (0.2–1.2)          | -37.3% (-74.6 to 54.3%)   | 0.1% (0–0.3%)      | <0.1 (<0.1–<0.1)  | -37.3% (-74.6 to 54.3%)  |
| Kidney dysfunction                         | Stroke                                  | 32% (24–39.4%)     | 1120.1 (755.8–1574.4)  | -44.1% (-57.9 to -26.8%)  | 28.4% (21–35.6%)   | 45.9 (29.8–65.2)  | -44.5% (-58.1 to -28.4%) |
|                                            | Ischaemic stroke                        | 30.3% (22.5–37.5%) | 565.5 (387.8–817.9)    | -8.4% (-30.4 to 18.8%)    | 26.8% (19.7–34%)   | 26.3 (17.3–38.8)  | -15.4% (-35.8 to 11.6%)  |
|                                            | Intracerebral haemorrhage               | 34.1% (25.8–41.5%) | 476.3 (315.8–683.1)    | -60.3% (-71.3 to -46.5%)  | 31% (23.1–38.4%)   | 16.8 (10.8–24.4)  | -62.4% (-72.2 to -50.1%) |
|                                            | Subarachnoid haemorrhage                | 33.6% (25.4–41.8%) | 78.3 (26–140.1)        | -58.4% (-71.3 to -33.7%)  | 30.6% (22.6–38.7%) | 2.8 (0.9–5.4)     | -59.7% (-71.3 to -34.6%) |
|                                            | Stroke                                  | 9.9% (8.1–11.6%)   | 345.8 (241.5–470.4)    | 7.6% (-17.3 to 35.5%)     | 9.6% (7.1–12%)     | 15.5 (9.7–22.1)   | 12% (-15.3 to 42.2%)     |
|                                            | Ischaemic stroke                        | 11.6% (8.9–14.3%)  | 216.4 (143.6–305.5)    | 69% (30.9 to 113.7%)      | 10.2% (6.5–13.8%)  | 10 (5.6–15.1)     | 66.4% (26 to 113.5%)     |
| Lead exposure                              | Intracerebral haemorrhage               | 9.3% (7.6–11.2%)   | 129.4 (85.2–182.3)     | -33.1% (-50.3 to -12.4%)  | 10.1% (7.9–12.2%)  | 5.5 (3.4–7.8)     | -30.1% (-47.3 to -10.5%) |
|                                            | Stroke                                  | 12.4% (9.4–15.4%)  | 434.9 (284.8–613.6)    | -16.9% (-37.4 to 7%)      | 12% (9–14.9%)      | 19.3 (12.1–28)    | -8.5% (-30.2 to 15.9%)   |
|                                            | Ischaemic stroke                        | 11.6% (8.4–14.8%)  | 216.3 (137.8–313.6)    | 48.3% (14 to 90.9%)       | 11% (7.9–14.6%)    | 10.8 (6.5–16.5)   | 53.4% (18.2 to 97.5%)    |
|                                            | Intracerebral haemorrhage               | 13.5% (9.7–17.5%)  | 188 (116.7–272.6)      | -42.6% (-57.3 to -23.8%)  | 13.4% (9.5–17.7%)  | 7.3 (4.3–10.7)    | -40.4% (-54.8 to -22.6%) |
| Low birth weight                           | Subarachnoid haemorrhage                | 12.9% (9.1–17.2%)  | 30.5 (11.1–58.1)       | -39.1% (-57.1 to -5.9%)   | 13% (9–17.8%)      | 1.2 (0.4–2.4)     | -34.6% (-53.1 to 3%)     |
|                                            | Meningitis                              | 5.7% (2.9–10%)     | 13.8 (6.8–24.7)        | -75.6% (-89.2 to -44.2%)  | 3.7% (1.8–6.9%)    | 0.2 (0.1–0.3)     | -75.6% (-89.2 to -44.2%) |
|                                            | Encephalitis                            | 1.1% (0.5–2.3%)    | 2 (0.8–5)              | -9.5% (-63.1 to 118.9%)   | 0.5% (0.2–1.3%)    | <0.1 (<0.1–0.1)   | -9.5% (-63.1 to 118.8%)  |
| Low birth weight and short gestation       | Meningitis                              | 5.9% (3–10.4%)     | 14.3 (7.1–25.7)        | -75.4% (-89 to -43.5%)    | 3.8% (1.8–7.1%)    | 0.2 (0.1–0.3)     | -75.4% (-89 to -43.5%)   |
|                                            | Encephalitis                            | 1.1% (0.5–2.3%)    | 2.1 (0.8–5.2)          | -9.4% (-62.7 to 119.3%)   | 0.5% (0.2–1.3%)    | <0.1 (<0.1–0.1)   | -9.4% (-62.7 to 119.3%)  |
| Low physical activity                      | Stroke                                  | 3.7% (0.8–8.9%)    | 129.9 (25.1–306.9)     | 31.8% (2.6 to 64.1%)      | 5% (1.1–11%)       | 8.1 (1.7–18)      | 27.2% (-0.5 to 60.4%)    |

**Table S16** Regional and national disabilities and deaths related to neurological conditions attributable to risk factors in North Africa and Middle East countries

| Location<br>Risk factor (alphabetic order) | Cause                                   | DALYs (95% UI)     |                        |                          | Deaths (95% UI)          |                    |                          |
|--------------------------------------------|-----------------------------------------|--------------------|------------------------|--------------------------|--------------------------|--------------------|--------------------------|
|                                            |                                         | PAF (%)            | Rate per 100,000       | Rate change (%)          | PAF (%)                  | Rate per 100,000   | Rate change (%)          |
|                                            |                                         | 2019               | 2019                   | From 1990 to 2019        | 2019                     | 2019               | From 1990 to 2019        |
| Low temperature                            | Ischaemic stroke                        | 7% (1.5–16.6%)     | 129.9 (25.1–306.9)     | 31.8% (2.6 to 64.1%)     | 8.3% (1.8–17.7%)         | 8.1 (1.7–18)       | 27.2% (-0.5 to 60.4%)    |
|                                            | Stroke                                  | 8.9% (6.2–12.1%)   | 310 (185.3–451)        | -22.6% (-41.2 to -1.5%)  | 9.5% (6.7–13.2%)         | 15.4 (9.1–22.6)    | -18% (-36.1 to 1.3%)     |
|                                            | Ischaemic stroke                        | 8.6% (6.1–11.7%)   | 159.8 (97–234.7)       | 29.6% (-1.9 to 67.2%)    | 9.5% (6.7–13.2%)         | 9.4 (5.7–13.8)     | 24.5% (-2.7 to 57%)      |
|                                            | Intracerebral haemorrhage               | 9.2% (6.4–12.6%)   | 128.7 (74.2–191.7)     | -46.1% (-59.9 to -28.4%) | 9.5% (6.7–13.2%)         | 5.2 (2.9–7.7)      | -47% (-59.7 to -31.7%)   |
|                                            | Subarachnoid haemorrhage                | 9.1% (6.3–12.4%)   | 21.5 (6.5–40.5)        | -44.2% (-59.9 to -14.4%) | 9.5% (6.7–13.2%)         | 0.9 (0.3–1.8)      | -42.2% (-58.3 to -11.2%) |
| Metabolic risk factors†                    | Stroke                                  | 72.9% (65.5–79.7%) | 2551.6 (1806.9–3399.4) | -12.2% (-32.7 to 12.5%)  | 70% (61.5–78.8%)         | 113.2 (76.4–150.1) | -9.5% (-30.2 to 13.8%)   |
|                                            | Ischaemic stroke                        | 73.9% (64.9–84.1%) | 1378 (992.7–1835.5)    | 41.5% (9.4 to 78.5%)     | 69.7% (57.9–84.1%)       | 68.3 (45.9–94.7)   | 37.4% (6.3 to 74.2%)     |
|                                            | Intracerebral haemorrhage               | 72.4% (64–80%)     | 1012.9 (691.2–1384.7)  | -39.7% (-55.2 to -19.4%) | 71.4% (62.8–79.7%)       | 38.6 (25.9–53.1)   | -41.1% (-56 to -23.1%)   |
|                                            | Subarachnoid haemorrhage                | 68.4% (58.7–76.8%) | 160.7 (52.7–279.9)     | -36.2% (-56.2 to -0.4%)  | 67.3% (57–76.8%)         | 6.3 (1.8–11.6)     | -35.9% (-54.9 to 1.5%)   |
|                                            | Neurological disorders*                 | 7% (2.1–15.7%)     | 105 (28.6–292.2)       | 60.3% (33.5 to 114.4%)   | 16.4% (5.7–30.5%)        | 7.3 (1.3–23.3)     | 61% (29.8 to 122.5%)     |
| Non-optimal temperature                    | Alzheimer's disease and other dementias | 24.2% (10.5–41%)   | 105 (28.6–292.2)       | 60.3% (33.5 to 114.4%)   | 23.5% (10–40.2%)         | 7.3 (1.3–23.3)     | 61% (29.8 to 122.5%)     |
|                                            | Stroke                                  | 9.4% (6.9–12.6%)   | 328.6 (204.9–469.1)    | -22.8% (-41.4 to -1.6%)  | 10.1% (7.5–13.6%)        | 16.3 (10–23.6)     | -18.2% (-36.2 to 1.2%)   |
|                                            | Ischaemic stroke                        | 9.1% (6.7–12.1%)   | 169.5 (107.1–243.3)    | 29.3% (-1.8 to 65.8%)    | 10.1% (7.5–13.6%)        | 9.9 (6.2–14.2)     | 24.3% (-3 to 56.4%)      |
|                                            | Intracerebral haemorrhage               | 9.8% (7.2–13.1%)   | 136.4 (83.5–198.2)     | -46.2% (-59.8 to -28.2%) | 10.1% (7.5–13.6%)        | 5.5 (3.3–8)        | -47.1% (-59.8 to -32%)   |
|                                            | Subarachnoid haemorrhage                | 9.6% (7–12.8%)     | 22.8 (6.9–42.4)        | -44.3% (-60.1 to -15%)   | 10.1% (7.5–13.6%)        | 1 (0.3–1.8)        | -42.3% (-58.4 to -11.5%) |
| Other environmental risks                  | Stroke                                  | 12.4% (9.4–15.4%)  | 434.9 (284.8–613.6)    | -16.9% (-37.4 to 7%)     | 12% (9–14.9%)            | 19.3 (12.1–28)     | -8.5% (-30.2 to 15.9%)   |
|                                            | Ischaemic stroke                        | 11.6% (8.4–14.8%)  | 216.3 (137.8–313.6)    | 48.3% (14 to 90.9%)      | 11% (7.9–14.6%)          | 10.8 (6.5–16.5)    | 53.4% (18.2 to 97.5%)    |
|                                            | Intracerebral haemorrhage               | 13.5% (9.7–17.5%)  | 188 (116.7–272.6)      | -42.6% (-57.3 to -23.8%) | 13.4% (9.5–17.7%)        | 7.3 (4.3–10.7)     | -40.4% (-54.8 to -22.6%) |
|                                            | Subarachnoid haemorrhage                | 12.9% (9.1–17.2%)  | 30.5 (11.1–58.1)       | -39.1% (-57.1 to -5.9%)  | 13% (9–17.8%)            | 1.2 (0.4–2.4)      | -34.6% (-53.1 to 3%)     |
|                                            | Particulate matter pollution            | Meningitis         | 1.6% (0.8–2.8%)        | 3.9 (1.8–7)              | -80.3% (-91.4 to -52.2%) | 1% (0.5–1.9%)      | <0.1 (<0.1–0.1)          |
| Encephalitis                               |                                         | 0.3% (0.1–0.7%)    | 0.6 (0.2–1.5)          | -25.9% (-70.4 to 85.9%)  | 0.1% (0–0.4%)            | <0.1 (<0.1–<0.1)   | -25.9% (-70.4 to 85.9%)  |
| Stroke                                     |                                         | 42% (38.1–46%)     | 1470.1 (1038.2–1910.8) | -32.2% (-49 to -12.5%)   | 37.3% (33.3–41.7%)       | 60.3 (41–79.3)     | -32.7% (-49.3 to -13.8%) |
| Ischaemic stroke                           |                                         | 39.8% (35.8–44.1%) | 742.3 (545.1–990.3)    | 11% (-15.9 to 44.3%)     | 35.2% (31.3–40%)         | 34.5 (24–47.2)     | 2.7% (-23.3 to 36.4%)    |
| Intracerebral haemorrhage                  |                                         | 44.7% (40.6–48.7%) | 625.2 (435.8–839.5)    | -51.8% (-64.5 to -35.1%) | 40.7% (36.7–44.9%)       | 22 (14.8–29.6)     | -54.4% (-66.3 to -39.4%) |
| Secondhand smoke                           | Subarachnoid haemorrhage                | 43.9% (39.4–48.8%) | 102.7 (33.5–177.9)     | -49.5% (-65.4 to -19.4%) | 40% (35.2–45.1%)         | 3.7 (1.1–6.8)      | -51% (-65.6 to -22%)     |
|                                            | Stroke                                  | 4.4% (3.3–5.6%)    | 154.5 (101–218.8)      | -18.4% (-39.4 to 6.2%)   | 3.7% (2.8–4.7%)          | 6 (3.9–8.5)        | -14.5% (-34.5 to 7.6%)   |
|                                            | Ischaemic stroke                        | 3.9% (2.9–5%)      | 73 (48.6–104.1)        | 45.8% (8.5 to 91.5%)     | 3.3% (2.5–4.2%)          | 3.2 (2.1–4.7)      | 40.2% (5.9 to 83.8%)     |
|                                            | Intracerebral haemorrhage               | 5% (3.7–6.4%)      | 70.1 (43.8–104.8)      | -41.8% (-58.1 to -21.6%) | 4.3% (3.2–5.5%)          | 2.3 (1.4–3.4)      | -42.1% (-57.5 to -23.5%) |
|                                            | Subarachnoid haemorrhage                | 4.9% (3.5–6.5%)    | 11.5 (3.7–20.5)        | -39.6% (-59.6 to -4%)    | 4.2% (3–5.7%)            | 0.4 (0.1–0.7)      | -38.5% (-57.9 to -1.3%)  |
| Short gestation                            | Meningitis                              | 4.1% (2.1–7.3%)    | 10 (4.9–17.9)          | -74.4% (-88.5 to -41.4%) | 2.7% (1.3–4.9%)          | 0.1 (0.1–0.2)      | -74.4% (-88.5 to -41.4%) |
|                                            | Encephalitis                            | 0.8% (0.4–1.6%)    | 1.5 (0.6–3.6)          | -6.9% (-61.6 to 122.5%)  | 0.4% (0.1–0.9%)          | <0.1 (<0.1–<0.1)   | -6.9% (-61.6 to 122.5%)  |
| Smoking                                    | Stroke                                  | 7.7% (6.6–9%)      | 269.9 (190.2–369.4)    | 26.6% (-8.6 to 76.4%)    | 5.8% (4.9–6.9%)          | 9.3 (6.4–12.9)     | 17.7% (-13.7 to 59.4%)   |

**Table S16** Regional and national disabilities and deaths related to neurological conditions attributable to risk factors in North Africa and Middle East countries

| Location         | Risk factor (alphabetic order) | Cause                                   | DALYs (95% UI)     |                        |                            | Deaths (95% UI)    |                        |                            |
|------------------|--------------------------------|-----------------------------------------|--------------------|------------------------|----------------------------|--------------------|------------------------|----------------------------|
|                  |                                |                                         | PAF (%)            | Rate per 100,000       | Rate change (%)            | PAF (%)            | Rate per 100,000       | Rate change (%)            |
|                  |                                |                                         | 2019               | 2019                   | From 1990 to 2019          | 2019               | 2019                   | From 1990 to 2019          |
| Tobacco          |                                | Ischaemic stroke                        | 6.8% (5.6–8.1%)    | 126.2 (91.2–181)       | 102.9% (47.6 to 180.3%)    | 4.9% (4–5.9%)      | 4.8 (3.4–7)            | 81.2% (30.5 to 151.7%)     |
|                  |                                | Intracerebral haemorrhage               | 8.9% (7.5–10.7%)   | 124.7 (86.6–170.8)     | -5.3% (-33.8 to 36.5%)     | 7.3% (6–8.9%)      | 3.9 (2.7–5.4)          | -14.8% (-39 to 20.6%)      |
|                  |                                | Subarachnoid haemorrhage                | 7.9% (4.9–10.6%)   | 19 (6.6–38.2)          | -1.7% (-34.4 to 73.9%)     | 6.4% (3.6–8.8%)    | 0.6 (0.2–1.3)          | -10.8% (-37.9 to 58.6%)    |
|                  |                                | Neurological disorders*                 | 2.4% (0.8–5.3%)    | 36.6 (10.2–96.7)       | 22.5% (-7.1 to 57.8%)      | 5.1% (1.5–8.9%)    | 2.3 (0.3–7.6)          | 22.6% (-10.5 to 66.5%)     |
|                  |                                | Alzheimer's disease and other dementias | 9.2% (5.6–13.3%)   | 39.9 (13.7–101.3)      | 19.9% (-8.2 to 51.3%)      | 8.4% (5–12.3%)     | 2.6 (0.5–7.8)          | 21.2% (-9.2 to 57%)        |
|                  |                                | Parkinson's disease                     | -4.4% (-6.9–2.3%)  | -5 (-8–2.6)            | 14.4% (-18.8 to 57.9%)     | -4.3% (-6.7–2.2%)  | -0.3 (-0.5–0.1)        | 13.7% (-19.6 to 56.4%)     |
|                  |                                | Multiple sclerosis                      | 6.2% (3.9–9.2%)    | 1.7 (0.9–2.8)          | 81.4% (26.4 to 153.6%)     | 6.5% (3.6–10.3%)   | <0.1 (<0.1–0.1)        | 60.9% (6.4 to 147.9%)      |
|                  |                                | Stroke                                  | 11.8% (10.3–13.4%) | 411.9 (293.6–559.7)    | 4.7% (-22.3 to 39.4%)      | 9.2% (8–10.7%)     | 14.9 (10.4–19.9)       | 2% (-22.9 to 33.4%)        |
|                  |                                | Ischaemic stroke                        | 10.4% (8.9–11.8%)  | 193.8 (141.6–269)      | 76.2% (31.5 to 133.2%)     | 8% (6.8–9.3%)      | 7.9 (5.6–10.9)         | 61.2% (20.4 to 112.3%)     |
|                  |                                | Intracerebral haemorrhage               | 13.5% (11.7–15.6%) | 188.6 (130.8–258.9)    | -23.4% (-45.1 to 5.6%)     | 11.2% (9.6–13.1%)  | 6.1 (4.1–8.3)          | -28.1% (-47.7 to -2.4%)    |
|                  |                                | Subarachnoid haemorrhage                | 12.5% (9.4–15.1%)  | 29.5 (10.3–55.6)       | -21.1% (-47.2 to 28.7%)    | 10.3% (7.5–12.9%)  | 1 (0.3–1.9)            | -24.7% (-47.3 to 23.4%)    |
|                  |                                | Neurological disorders*                 | 2.4% (0.8–5.3%)    | 36.6 (10.2–96.7)       | 22.5% (-7.1 to 57.8%)      | 5.1% (1.5–8.9%)    | 2.3 (0.3–7.6)          | 22.6% (-10.5 to 66.5%)     |
|                  |                                | Alzheimer's disease and other dementias | 9.2% (5.6–13.3%)   | 39.9 (13.7–101.3)      | 19.9% (-8.2 to 51.3%)      | 8.4% (5–12.3%)     | 2.6 (0.5–7.8)          | 21.2% (-9.2 to 57%)        |
|                  | Parkinson's disease            | -4.4% (-6.9–2.3%)                       | -5 (-8–2.6)        | 14.4% (-18.8 to 57.9%) | -4.3% (-6.7–2.2%)          | -0.3 (-0.5–0.1)    | 13.7% (-19.6 to 56.4%) |                            |
|                  | Multiple sclerosis             | 6.2% (3.9–9.2%)                         | 1.7 (0.9–2.8)      | 81.4% (26.4 to 153.6%) | 6.5% (3.6–10.3%)           | <0.1 (<0.1–0.1)    | 60.9% (6.4 to 147.9%)  |                            |
| <b>Sudan</b>     |                                |                                         |                    |                        |                            |                    |                        |                            |
| Air pollution    |                                | Meningitis                              | 1.2% (0.6–2.2%)    | 1.2 (0.5–2.2)          | -90.2% (-95.6 to -79.7%)   | 0.7% (0.3–1.4%)    | <0.1 (<0.1–<0.1)       | -90.2% (-95.6 to -79.7%)   |
|                  |                                | Encephalitis                            | 0.5% (0.2–1.1%)    | 0.2 (0.1–0.3)          | -39.4% (-77 to 76.3%)      | 0.3% (0.1–0.7%)    | <0.1 (<0.1–<0.1)       | -39.4% (-77.1 to 76.4%)    |
|                  |                                | Stroke                                  | 36.3% (31.1–40.6%) | 938.9 (668–1337.9)     | -44% (-57.4 to -25.9%)     | 32.1% (27.3–36.1%) | 40.2 (28.3–59.3)       | -45.2% (-59.6 to -26.4%)   |
|                  |                                | Ischaemic stroke                        | 35.2% (30.2–39.4%) | 596.3 (430.8–861.6)    | -9.3% (-32.4 to 20.7%)     | 30.8% (26.1–34.6%) | 27.8 (19.7–40.7)       | -17.8% (-40.4 to 11.2%)    |
|                  |                                | Intracerebral haemorrhage               | 38.5% (33.2–42.9%) | 296.8 (196–425.8)      | -66.2% (-75.6 to -52.7%)   | 35.5% (30.3–39.8%) | 10.8 (7.1–15.2)        | -68.5% (-77.4 to -55.8%)   |
|                  |                                | Subarachnoid haemorrhage                | 37.3% (32–42.2%)   | 45.8 (25.3–77.9)       | -67.1% (-79.3 to -37.3%)   | 35.2% (29.9–39.8%) | 1.6 (0.8–2.8)          | -69.7% (-80.7 to -38.3%)   |
| Alcohol use      |                                | Stroke                                  | 0% (-0.1–0%)       | -0.5 (-1.8–0.6)        | -101.5% (-109 to -98.2%)   | 0% (-0.1–0%)       | 0 (-0.1–0)             | -102.2% (-112.8 to -98.4%) |
|                  |                                | Ischaemic stroke                        | 0% (-0.1–0%)       | -0.8 (-2.1–0.2)        | -127.6% (-513.9 to 186.7%) | 0% (-0.1–0%)       | 0 (-0.1–0)             | -134.8% (-564.5 to 308.4%) |
|                  |                                | Intracerebral haemorrhage               | 0% (0–0.1%)        | 0.3 (-0.2–1.1)         | -99% (-100.8 to -97%)      | 0% (0–0.1%)        | <0.1 (<0.1–<0.1)       | -99.1% (-100.8 to -97.1%)  |
|                  |                                | Neurological disorders*                 | 0% (0–0%)          | 0.2 (0–0.4)            | -96.3% (-99 to -91.1%)     | 0% (0–0%)          | <0.1 (<0.1–<0.1)       | -96.8% (-99 to -93%)       |
|                  |                                | Idiopathic epilepsy                     | 0.1% (0–0.2%)      | 0.2 (0–0.4)            | -96.3% (-99 to -91.1%)     | 0.1% (0–0.2%)      | <0.1 (<0.1–<0.1)       | -96.8% (-99 to -93%)       |
| All risk factors |                                | Meningitis                              | 5.3% (3.8–9%)      | 5.3 (2.8–9.7)          | -86.8% (-93.3 to -76.2%)   | 3.2% (1.7–5.9%)    | 0.1 (0–0.1)            | -86.8% (-93.3 to -76.2%)   |
|                  |                                | Encephalitis                            | 2.2% (1.1–4.1%)    | 0.7 (0.3–1.1)          | -22.8% (-67.6 to 98%)      | 1.5% (0.7–2.9%)    | <0.1 (<0.1–<0.1)       | -22.8% (-67.6 to 98%)      |
|                  |                                | Stroke                                  | 89.3% (86.2–92.2%) | 2309.3 (1736.6–3195.8) | -29.3% (-43.2 to -11.8%)   | 88.8% (84.4–93.3%) | 111.2 (81.4–157.5)     | -27.2% (-40.6 to -8.8%)    |
|                  |                                | Ischaemic stroke                        | 90.4% (86.6–94.3%) | 1530.3 (1174.1–2133)   | 13.1% (-9 to 40.6%)        | 88.8% (83.4–94.9%) | 80.2 (58.9–114.9)      | 8% (-12.5 to 34.6%)        |

**Table S16** Regional and national disabilities and deaths related to neurological conditions attributable to risk factors in North Africa and Middle East countries

| Location<br>Risk factor (alphabetic order) | Cause                                   | DALYs (95% UI)     |                      |                           | Deaths (95% UI)    |                  |                          |
|--------------------------------------------|-----------------------------------------|--------------------|----------------------|---------------------------|--------------------|------------------|--------------------------|
|                                            |                                         | PAF (%)            | Rate per 100,000     | Rate change (%)           | PAF (%)            | Rate per 100,000 | Rate change (%)          |
|                                            |                                         | 2019               | 2019                 | From 1990 to 2019         | 2019               | 2019             | From 1990 to 2019        |
| Ambient particulate matter pollution       | Intracerebral haemorrhage               | 87.8% (83.9–91%)   | 676.5 (461–951)      | -59.1% (-69.5 to -44.9%)  | 89.2% (84.6–92.9%) | 27.2 (18.4–37.7) | -60.3% (-69.4 to -47.1%) |
|                                            | Subarachnoid haemorrhage                | 83.3% (76.9–87.8%) | 102.4 (58.6–172.8)   | -60.4% (-74.3 to -25.9%)  | 86.7% (81.4–91.1%) | 3.9 (2.1–6.6)    | -61.8% (-74.5 to -26.2%) |
|                                            | Neurological disorders*                 | 9.8% (3.7–20.4%)   | 131 (45.2–336.8)     | 33.8% (11.8 to 63.7%)     | 23.8% (10–39.3%)   | 8.2 (1.5–26.4)   | 39.9% (15.6 to 81.2%)    |
|                                            | Alzheimer's disease and other dementias | 37.4% (24.3–52.1%) | 137.2 (51.6–344.1)   | 35.1% (13.8 to 62%)       | 35.8% (22.8–50.5%) | 8.6 (1.8–26.8)   | 37.4% (13.4 to 71.6%)    |
|                                            | Parkinson's disease                     | -8.8% (-13.2–4.8%) | -7.5 (-12.2–4)       | -15% (-41.1 to 31.7%)     | -8.1% (-12.5–4.4%) | -0.4 (-0.7–0.2)  | -10.1% (-38.8 to 43.2%)  |
|                                            | Idiopathic epilepsy                     | 0.1% (0–0.2%)      | 0.2 (0–0.4)          | -96.3% (-99 to -91.1%)    | 0.1% (0–0.2%)      | <0.1 (<0.1–<0.1) | -96.8% (-99 to -93%)     |
|                                            | Multiple sclerosis                      | 8.6% (5.6–12%)     | 1.2 (0.7–1.9)        | 5.8% (-31.7 to 50.8%)     | 9.8% (6–14.1%)     | <0.1 (<0.1–<0.1) | 5.6% (-44.3 to 72.1%)    |
|                                            | Meningitis                              | 0.6% (0.3–1.3%)    | 0.6 (0.2–1.3)        | -41% (-78.6 to 95.8%)     | 0.4% (0.2–0.8%)    | <0.1 (<0.1–<0.1) | -41% (-78.6 to 95.8%)    |
|                                            | Encephalitis                            | 0.3% (0.1–0.6%)    | 0.1 (0–0.2)          | 260.8% (10.3 to 1547.2%)  | 0.2% (0.1–0.4%)    | <0.1 (<0.1–<0.1) | 260.8% (10.2 to 1547.4%) |
|                                            | Stroke                                  | 21.6% (13.2–29.5%) | 558.6 (317.3–894.1)  | 206.9% (59 to 596.3%)     | 19.1% (11.5–26.3%) | 24 (13.4–38.7)   | 203% (60.9 to 572.6%)    |
| Behavioural risk factors‡                  | Ischaemic stroke                        | 20.9% (12.6–28.8%) | 354.9 (206–573)      | 399.8% (163.3 to 1031.7%) | 18.4% (11.1–25.4%) | 16.6 (9.3–27.5)  | 358.2% (147.2 to 899.2%) |
|                                            | Intracerebral haemorrhage               | 22.9% (14–31.4%)   | 176.6 (96.2–274.8)   | 84.1% (-8.7 to 346.8%)    | 21.2% (13.1–29%)   | 6.4 (3.5–10.2)   | 72.8% (-13.1 to 306.7%)  |
|                                            | Subarachnoid haemorrhage                | 22% (13.6–30.7%)   | 27.1 (12.9–51)       | 80.2% (-15.7 to 447.9%)   | 20.9% (12.6–29.1%) | 0.9 (0.4–1.8)    | 66.1% (-20.5 to 405.5%)  |
|                                            | Meningitis                              | 5% (2.8–8.3%)      | 5 (2.6–9.1)          | -86.4% (-93 to -75%)      | 3% (1.6–5.5%)      | 0.1 (0–0.1)      | -86.4% (-93 to -75%)     |
|                                            | Encephalitis                            | 2% (1–3.9%)        | 0.6 (0.3–1)          | -20.4% (-66.6 to 104.2%)  | 1.4% (0.7–2.7%)    | <0.1 (<0.1–<0.1) | -20.4% (-66.6 to 104.2%) |
|                                            | Stroke                                  | 38.2% (32.3–44.3%) | 989.8 (705.8–1424.5) | -32.6% (-47.6 to -13.6%)  | 35.2% (28.9–41.5%) | 44.1 (30.4–64.8) | -30.1% (-44.5 to -12%)   |
|                                            | Ischaemic stroke                        | 40.7% (32.8–48.3%) | 688.7 (477.7–1021)   | 8.8% (-13.2 to 38.2%)     | 37.1% (29.1–44.8%) | 33.5 (22.3–50.4) | 3.2% (-17.2 to 29.3%)    |
|                                            | Intracerebral haemorrhage               | 33.8% (27.2–40.6%) | 261.2 (169.2–388.2)  | -63.9% (-74 to -49.8%)    | 30.5% (24.1–37.5%) | 9.3 (6–14)       | -65.2% (-74.3 to -52.9%) |
|                                            | Subarachnoid haemorrhage                | 32.3% (25.2–39.6%) | 39.9 (21.1–75.2)     | -64.1% (-77.1 to -31.6%)  | 30% (22.8–37.3%)   | 1.3 (0.6–2.6)    | -65.9% (-77.6 to -31.9%) |
|                                            | Neurological disorders*                 | 3.6% (1.2–8%)      | 48.2 (14.4–122.5)    | -8.6% (-30.7 to 13.5%)    | 7.8% (2–14%)       | 2.8 (0.3–8.8)    | -4.2% (-30 to 30.6%)     |
| Child and maternal malnutrition            | Alzheimer's disease and other dementias | 14.8% (8.9–21.3%)  | 54.4 (20.4–131.1)    | -3.5% (-23.1 to 20.4%)    | 13.2% (7.6–19.1%)  | 3.2 (0.6–9.1)    | -3.6% (-26.7 to 24.9%)   |
|                                            | Parkinson's disease                     | -8.8% (-13.2–4.8%) | -7.5 (-12.2–4)       | -15% (-41.1 to 31.7%)     | -8.1% (-12.5–4.4%) | -0.4 (-0.7–0.2)  | -10.1% (-38.8 to 43.2%)  |
|                                            | Idiopathic epilepsy                     | 0.1% (0–0.2%)      | 0.2 (0–0.4)          | -96.3% (-99 to -91.1%)    | 0.1% (0–0.2%)      | <0.1 (<0.1–<0.1) | -96.8% (-99 to -93%)     |
|                                            | Multiple sclerosis                      | 8.6% (5.6–12%)     | 1.2 (0.7–1.9)        | 5.8% (-31.7 to 50.8%)     | 9.8% (6–14.1%)     | <0.1 (<0.1–<0.1) | 5.6% (-44.3 to 72.1%)    |
|                                            | Meningitis                              | 5% (2.8–8.3%)      | 5 (2.6–9.1)          | -86.4% (-93 to -75%)      | 3% (1.6–5.5%)      | 0.1 (0–0.1)      | -86.4% (-93 to -75%)     |
|                                            | Encephalitis                            | 2% (1–3.9%)        | 0.6 (0.3–1)          | -20.4% (-66.6 to 104.2%)  | 1.4% (0.7–2.7%)    | <0.1 (<0.1–<0.1) | -20.4% (-66.6 to 104.2%) |
|                                            | Stroke                                  | 3.3% (1.1–5.2%)    | 85.3 (29–150.8)      | -31.8% (-58.1 to 15.6%)   | 2.5% (0.9–4%)      | 3.2 (1.1–5.8)    | -32.2% (-58 to 10.5%)    |
|                                            | Ischaemic stroke                        | 2.9% (0.4–4.9%)    | 49.7 (6.8–94.3)      | 22.1% (-8.4 to 68.4%)     | 2.2% (0.4–3.6%)    | 2 (0.3–3.8)      | 13.9% (-13.8 to 57.8%)   |
|                                            | Intracerebral haemorrhage               | 4% (0.6–6.7%)      | 30.8 (4.3–61.7)      | -57.7% (-71.1 to -36.7%)  | 3.4% (0.5–5.7%)    | 1 (0.1–2.1)      | -59.3% (-71.1 to -39.8%) |
|                                            | Subarachnoid haemorrhage                | 4% (0.6–6.8%)      | 4.8 (0.6–11.1)       | -58.9% (-74.4 to -20.2%)  | 3.4% (0.5–5.8%)    | 0.2 (0–0.4)      | -61.4% (-75.8 to -20.8%) |
| Diet high in red meat                      | Stroke                                  | 2% (0.3–7.9%)      | 51.6 (6.1–210.2)     | -32.7% (-62 to 30.1%)     | 1.7% (0.3–7%)      | 2.2 (0.3–9.1)    | -31.4% (-59.5 to 32.7%)  |



**Table S16** Regional and national disabilities and deaths related to neurological conditions attributable to risk factors in North Africa and Middle East countries

| Location<br>Risk factor (alphabetic order) | Cause                     | DALYs (95% UI)     |                       |                          | Deaths (95% UI)         |                    |                          |                         |
|--------------------------------------------|---------------------------|--------------------|-----------------------|--------------------------|-------------------------|--------------------|--------------------------|-------------------------|
|                                            |                           | PAF (%)            | Rate per 100,000      | Rate change (%)          | PAF (%)                 | Rate per 100,000   | Rate change (%)          |                         |
|                                            |                           | 2019               | 2019                  | From 1990 to 2019        | 2019                    | 2019               | From 1990 to 2019        |                         |
| Diet low in fibre                          | Ischaemic stroke          | 1.9% (0.3–7.5%)    | 31.4 (4.1–130.4)      | 14.7% (-38.7 to 114.8%)  | 1.6% (0.3–6.3%)         | 1.4 (0.2–6.1)      | 10.4% (-42 to 103.7%)    |                         |
|                                            | Intracerebral haemorrhage | 2.3% (0.3–9.1%)    | 17.6 (1.8–73.6)       | -58.8% (-77.5 to -22.2%) | 2.1% (0.3–8.5%)         | 0.6 (0.1–2.7)      | -60.3% (-77.9 to -21.9%) |                         |
|                                            | Subarachnoid haemorrhage  | 2.1% (0.2–8.5%)    | 2.6 (0.2–11.4)        | -60% (-80.4 to -4.2%)    | 2.1% (0.3–8.3%)         | 0.1 (0–0.4)        | -61.7% (-79.9 to -6.3%)  |                         |
|                                            | Stroke                    | 4% (0.8–7.4%)      | 104.6 (20.7–206)      | -46.2% (-62.7 to -28.3%) | 3.4% (0.8–6.3%)         | 4.3 (0.9–8.6)      | -45.5% (-61.5 to -27.5%) |                         |
|                                            | Ischaemic stroke          | 3.8% (0.8–7.1%)    | 65.2 (12.9–128.7)     | -8.1% (-34.6 to 24.7%)   | 3.2% (0.7–5.9%)         | 2.9 (0.6–5.8)      | -13.3% (-39.7 to 16.3%)  |                         |
| Diet low in fruits                         | Intracerebral haemorrhage | 4.4% (0.9–8%)      | 34 (6.6–67.3)         | -68% (-78.5 to -54.6%)   | 4% (0.8–7.3%)           | 1.2 (0.2–2.4)      | -69.1% (-78.4 to -56.8%) |                         |
|                                            | Subarachnoid haemorrhage  | 4.4% (0.9–8.2%)    | 5.4 (1.1–12.7)        | -68.6% (-81.1 to -39.7%) | 4% (0.8–7.5%)           | 0.2 (0–0.4)        | -70.3% (-81.7 to -40.4%) |                         |
|                                            | Stroke                    | 5.9% (2.8–9.6%)    | 153.1 (65.8–282.2)    | -45.2% (-64.5 to -19%)   | 4.8% (2.2–7.8%)         | 6 (2.5–11.2)       | -45.1% (-64.2 to -20.5%) |                         |
|                                            | Ischaemic stroke          | 4.7% (1.1–9%)      | 80.3 (17.8–175.8)     | 4.2% (-24.1 to 37.5%)    | 3.8% (0.9–7.3%)         | 3.5 (0.8–7.6)      | -2.6% (-31.3 to 27.8%)   |                         |
|                                            | Intracerebral haemorrhage | 8.2% (3.8–15%)     | 62.9 (27.7–124.7)     | -63.9% (-74.7 to -48.3%) | 7.3% (3.4–13.5%)        | 2.2 (1–4.4)        | -65.3% (-74.9 to -50.8%) |                         |
| Diet low in vegetables                     | Subarachnoid haemorrhage  | 8.1% (3.8–14.8%)   | 9.9 (3.7–21.7)        | -64.8% (-78.2 to -33.6%) | 7.3% (3.4–13.5%)        | 0.3 (0.1–0.8)      | -66.7% (-78.9 to -34.8%) |                         |
|                                            | Stroke                    | 3.4% (1.1–5.6%)    | 86.7 (28.7–162.7)     | -50.4% (-69.1 to -17.3%) | 2.8% (1.4–7%)           | 3.6 (1.2–6.6)      | -49.5% (-68.6 to -19%)   |                         |
|                                            | Ischaemic stroke          | 2.7% (0.4–5%)      | 45.7 (6–90.2)         | -0.7% (-30.9 to 33.7%)   | 2.3% (0.3–4.2%)         | 2.1 (0.3–4.1)      | -5.9% (-32.8 to 24.1%)   |                         |
|                                            | Intracerebral haemorrhage | 4.6% (0.4–9.6%)    | 35.5 (2.9–77.4)       | -68% (-81.9 to -54%)     | 4.3% (0.4–8.9%)         | 1.3 (0.1–2.8)      | -68.8% (-81.1 to -55.8%) |                         |
|                                            | Subarachnoid haemorrhage  | 4.5% (0.4–9.3%)    | 5.5 (0.4–13.3)        | -69.1% (-83.4 to -41%)   | 4.3% (0.4–8.7%)         | 0.2 (0–0.5)        | -70.3% (-83.4 to -41.6%) |                         |
| Diet low in whole grains                   | Stroke                    | 6% (3.2–7.9%)      | 154.9 (78.1–238.1)    | 11.6% (-11.4 to 41%)     | 5.9% (3.4–7.6%)         | 7.4 (3.9–11.6)     | 5.4% (-16.1 to 32%)      |                         |
|                                            | Ischaemic stroke          | 9.1% (4.9–11.9%)   | 154.9 (78.1–238.1)    | 11.6% (-11.4 to 41%)     | 8.1% (4.7–10.4%)        | 7.4 (3.9–11.6)     | 5.4% (-16.1 to 32%)      |                         |
|                                            | Stroke                    | 21.9% (16.3–27.8%) | 567.2 (380.9–891.4)   | -35.4% (-50.8 to -15.9%) | 19.3% (14.4–24.6%)      | 24.3 (15.9–38.4)   | -34.3% (-48.7 to -15.8%) |                         |
| Dietary risks                              | Ischaemic stroke          | 22.4% (16–28.8%)   | 379.4 (241.1–592.9)   | 6.9% (-15.3 to 36.4%)    | 19.4% (14–24.9%)        | 17.5 (10.8–27.5)   | 0.8% (-19.6 to 27.5%)    |                         |
|                                            | Intracerebral haemorrhage | 21.1% (13.8–28.6%) | 162.4 (92.2–262.9)    | -64% (-73.8 to -50.1%)   | 19.3% (12.5–26.5%)      | 5.9 (3.3–9.7)      | -65.3% (-74 to -52.7%)   |                         |
|                                            | Subarachnoid haemorrhage  | 20.6% (13.4–28.2%) | 25.4 (12.6–49.2)      | -64.9% (-77.6 to -33.9%) | 19.2% (12.4–26.6%)      | 0.9 (0.4–1.7)      | -66.8% (-78.2 to -34.4%) |                         |
|                                            | Stroke                    | 45.4% (39.9–49.7%) | 1174.4 (841.1–1661.1) | -40.8% (-54 to -23.4%)   | 42.3% (37–46.8%)        | 53.1 (37.3–76.2)   | -39.9% (-53.3 to -22.1%) |                         |
|                                            | Ischaemic stroke          | 44.3% (38.8–48.6%) | 750.8 (551.7–1085.2)  | -3.4% (-25.9 to 26.4%)   | 41% (35.5–45.5%)        | 37.1 (26.3–53.6)   | -9.1% (-32.3 to 19.8%)   |                         |
| Environmental/occupational risk factors§   | Intracerebral haemorrhage | 47.6% (42.1–52.4%) | 367.1 (242.3–520.5)   | -64.8% (-74.1 to -51.6%) | 45.9% (40.2–50.7%)      | 14 (9.2–19.7)      | -66.1% (-74.7 to -53.5%) |                         |
|                                            | Subarachnoid haemorrhage  | 45.9% (40.3–51%)   | 56.5 (31.5–97.6)      | -66% (-78.2 to -36.2%)   | 45.3% (39.8–50.7%)      | 2 (1.1–3.5)        | -67.4% (-78.8 to -35.9%) |                         |
|                                            | Stroke                    | 30.4% (20.5–40.6%) | 788.1 (470.6–1219.2)  | 7.6% (-24.6 to 73.4%)    | 20.3% (12.7–28.7%)      | 25.4 (14.3–40.4)   | 11.6% (-20.9 to 75.9%)   |                         |
|                                            | Ischaemic stroke          | 24.1% (15.5–33.6%) | 407.8 (234.4–645.8)   | 124.9% (64.4 to 259.2%)  | 15.8% (9.2–23.4%)       | 14.3 (7.6–24.5)    | 123.8% (60.3 to 255.8%)  |                         |
|                                            | Intracerebral haemorrhage | 42.5% (29.9–54.4%) | 328.3 (190.2–509.5)   | -30.5% (-54.2 to 19.7%)  | 32.1% (21–43.5%)        | 9.8 (5.4–15.6)     | -31.1% (-53.2 to 17.5%)  |                         |
|                                            | Subarachnoid haemorrhage  | 42.5% (29.5–55%)   | 51.9 (27.1–92.1)      | -34.1% (-61 to 32.1%)    | 32.1% (21–44.7%)        | 1.4 (0.7–2.7)      | -36.5% (-62 to 33%)      |                         |
|                                            | Neurological disorders*   | 4.1% (1.1–9.4%)    | 54.3 (14.6–141.7)     | 123.6% (61.7 to 300.4%)  | 10% (3.4–19.8%)         | 3.4 (0.5–10.8)     | 131.1% (56.6 to 374.5%)  |                         |
|                                            | High body-mass index      | Stroke             | 30.4% (20.5–40.6%)    | 788.1 (470.6–1219.2)     | 7.6% (-24.6 to 73.4%)   | 20.3% (12.7–28.7%) | 25.4 (14.3–40.4)         | 11.6% (-20.9 to 75.9%)  |
|                                            |                           | Ischaemic stroke   | 24.1% (15.5–33.6%)    | 407.8 (234.4–645.8)      | 124.9% (64.4 to 259.2%) | 15.8% (9.2–23.4%)  | 14.3 (7.6–24.5)          | 123.8% (60.3 to 255.8%) |
| Intracerebral haemorrhage                  |                           | 42.5% (29.9–54.4%) | 328.3 (190.2–509.5)   | -30.5% (-54.2 to 19.7%)  | 32.1% (21–43.5%)        | 9.8 (5.4–15.6)     | -31.1% (-53.2 to 17.5%)  |                         |



**Table S16** Regional and national disabilities and deaths related to neurological conditions attributable to risk factors in North Africa and Middle East countries

| Location<br>Risk factor (alphabetic order) | Cause                                   | DALYs (95% UI)     |                        |                          | Deaths (95% UI)    |                   |                          |
|--------------------------------------------|-----------------------------------------|--------------------|------------------------|--------------------------|--------------------|-------------------|--------------------------|
|                                            |                                         | PAF (%)            | Rate per 100,000       | Rate change (%)          | PAF (%)            | Rate per 100,000  | Rate change (%)          |
|                                            |                                         | 2019               | 2019                   | From 1990 to 2019        | 2019               | 2019              | From 1990 to 2019        |
| High fasting plasma glucose                | Alzheimer's disease and other dementias | 14.8% (6.1–26.7%)  | 54.3 (14.6–141.7)      | 123.6% (61.7 to 300.4%)  | 14.1% (5.7–25.5%)  | 3.4 (0.5–10.8)    | 131.1% (56.6 to 374.5%)  |
|                                            | Stroke                                  | 30.6% (19.3–48.6%) | 789.9 (460.5–1335.5)   | 46.2% (3.8 to 110.5%)    | 32.3% (18–59%)     | 40.3 (21.4–74.9)  | 39.1% (-3.2 to 108.5%)   |
|                                            | Ischaemic stroke                        | 32.8% (16.5–59.5%) | 554.3 (271.4–1092.5)   | 115.5% (53.4 to 218.4%)  | 33.1% (15.8–68.6%) | 29.8 (13.1–64.2)  | 92.6% (35.5 to 201.7%)   |
|                                            | Intracerebral haemorrhage               | 26.8% (16.2–38.8%) | 206.2 (111.7–332.6)    | -16.1% (-41.7 to 21.2%)  | 30.3% (18.2–47.2%) | 9.2 (4.8–15.5)    | -21.6% (-45.3 to 16.6%)  |
|                                            | Subarachnoid haemorrhage                | 23.9% (14.3–35.1%) | 29.5 (13.3–54.8)       | -21.4% (-50.9 to 56%)    | 29.1% (17.7–45.9%) | 1.3 (0.5–2.6)     | -25.7% (-53.6 to 56%)    |
|                                            | Neurological disorders*                 | 3.7% (0.6–10.6%)   | 49.9 (9–154.8)         | 66.7% (50.4 to 97.2%)    | 9.7% (2–22.1%)     | 3.3 (0.4–12.2)    | 62.8% (42.4 to 101.4%)   |
| High LDL cholesterol                       | Alzheimer's disease and other dementias | 13.6% (3.4–28.3%)  | 49.9 (9–154.8)         | 66.7% (50.4 to 97.2%)    | 13.7% (3.4–28.4%)  | 3.3 (0.4–12.2)    | 62.8% (42.4 to 101.4%)   |
|                                            | Stroke                                  | 13.6% (8.2–22.3%)  | 351.2 (191.4–615.1)    | 28.8% (1.7 to 68.7%)     | 12.4% (5–25.5%)    | 15.6 (5.7–34.2)   | 20.2% (-4 to 58.5%)      |
| High systolic blood pressure               | Ischaemic stroke                        | 20.7% (12.2–34.5%) | 351.2 (191.4–615.1)    | 28.8% (1.7 to 68.7%)     | 17.2% (6.8–34.9%)  | 15.6 (5.7–34.2)   | 20.2% (-4 to 58.5%)      |
|                                            | Stroke                                  | 61.6% (54–68.4%)   | 1592.1 (1151.5–2261.1) | -26% (-41.5 to -4.4%)    | 58.6% (49.6–67.9%) | 73.4 (50.8–105.5) | -23.4% (-39.3 to -1.1%)  |
| High temperature                           | Ischaemic stroke                        | 59.8% (49.2–68.9%) | 1012.8 (706.9–1466.3)  | 24.5% (-0.8 to 57.4%)    | 56.1% (43.7–67.9%) | 50.7 (33.7–76.8)  | 19.8% (-5.7 to 53.3%)    |
|                                            | Intracerebral haemorrhage               | 65.3% (55.8–73.3%) | 503.1 (334.5–713.6)    | -56.5% (-67.4 to -40.4%) | 65.4% (54.6–75.6%) | 19.9 (13.1–28.7)  | -57.2% (-67.2 to -42.2%) |
|                                            | Subarachnoid haemorrhage                | 62.1% (51.3–71%)   | 76.2 (43–130.2)        | -57.9% (-72.9 to -20.8%) | 64% (53.2–73.6%)   | 2.9 (1.5–4.9)     | -59% (-72.8 to -20.5%)   |
|                                            | Stroke                                  | 3.9% (1.5–7.5%)    | 101 (35.3–219.9)       | -25.1% (-74.3 to 11%)    | 4.4% (1.6–8.3%)    | 5.5 (1.9–12)      | -17.6% (-69.7 to 23.1%)  |
|                                            | Ischaemic stroke                        | 3.8% (1.4–7.3%)    | 64.1 (22.4–139.7)      | 23.8% (-57.7 to 81.3%)   | 4.4% (1.6–8.3%)    | 3.9 (1.4–8.5)     | 22.2% (-55.3 to 79%)     |
|                                            | Intracerebral haemorrhage               | 4.1% (1.6–8%)      | 31.9 (11.4–69.3)       | -54.9% (-85 to -28.6%)   | 4.4% (1.6–8.3%)    | 1.3 (0.5–2.8)     | -55% (-83.9 to -29.8%)   |
| Household air pollution from solid fuels   | Subarachnoid haemorrhage                | 4% (1.5–7.5%)      | 5 (1.5–11.8)           | -59.2% (-85.8 to -15.2%) | 4.4% (1.6–8.3%)    | 0.2 (0.1–0.5)     | -56.9% (-83.8 to -6.9%)  |
|                                            | Meningitis                              | 0.5% (0.2–1.1%)    | 0.5 (0.2–1.1)          | -95.1% (-98.1 to -89%)   | 0.3% (0.1–0.7%)    | <0.1 (<0.1–<0.1)  | -95.1% (-98.1 to -89%)   |
|                                            | Encephalitis                            | 0.2% (0.1–0.5%)    | 0.1 (0–0.1)            | -69.4% (-89.9 to -7.4%)  | 0.2% (0.1–0.4%)    | <0.1 (<0.1–<0.1)  | -69.4% (-89.9 to -7.3%)  |
|                                            | Stroke                                  | 14.7% (9.1–21.2%)  | 380.3 (213.6–621.6)    | -74.5% (-84.5 to -61.4%) | 13% (8–19%)        | 16.2 (8.9–26.7)   | -75.2% (-84.5 to -62%)   |
|                                            | Ischaemic stroke                        | 14.3% (8.8–20.7%)  | 241.4 (135.5–392.8)    | -58.8% (-74.6 to -38.5%) | 12.4% (7.7–18.3%)  | 11.2 (6.2–18.8)   | -62.8% (-76.7 to -44%)   |
|                                            | Intracerebral haemorrhage               | 15.6% (9.6–22.5%)  | 120.3 (63.8–200.5)     | -84.6% (-91 to -75.4%)   | 14.3% (8.9–20.8%)  | 4.4 (2.4–7.3)     | -85.7% (-91.5 to -77.6%) |
| Kidney dysfunction                         | Subarachnoid haemorrhage                | 15.3% (9.4–22.3%)  | 18.6 (8.9–35.8)        | -85% (-91.9 to -69%)     | 14.3% (8.8–21%)    | 0.6 (0.3–1.2)     | -86.3% (-92.5 to -70.1%) |
|                                            | Stroke                                  | 10.1% (8–12.2%)    | 260.1 (182.5–369.4)    | 1.6% (-18.7 to 26.9%)    | 9.8% (6.7–12.8%)   | 12.2 (7.5–18.6)   | 3.6% (-19.7 to 32.8%)    |
|                                            | Ischaemic stroke                        | 11.4% (8.4–14.2%)  | 192.1 (125.5–285.4)    | 53.5% (22.9 to 91.5%)    | 10.1% (6.1–14%)    | 9.1 (4.9–15)      | 48.6% (14.5 to 88.7%)    |
|                                            | Intracerebral haemorrhage               | 8.9% (7.2–10.7%)   | 68.1 (45.3–97)         | -48.1% (-60.5 to -29.5%) | 10.2% (7.8–12.6%)  | 3.1 (2–4.5)       | -45.4% (-58.1 to -25.9%) |
| Lead exposure                              | Stroke                                  | 8.9% (6.4–11.5%)   | 230.7 (144.7–348.1)    | -38.6% (-52.1 to -21.3%) | 9% (6.4–11.8%)     | 11.3 (7.1–17.4)   | -29.9% (-45.4 to -9.9%)  |
|                                            | Ischaemic stroke                        | 8.8% (6.1–11.7%)   | 148.4 (90.6–227.8)     | 10.5% (-13.1 to 39.3%)   | 8.6% (5.9–11.9%)   | 7.8 (4.6–12.6)    | 16.1% (-9 to 46.1%)      |
|                                            | Intracerebral haemorrhage               | 9.3% (6.1–12.6%)   | 71.8 (41.9–112.1)      | -65.7% (-75.2 to -53.2%) | 10% (6.8–13.8%)    | 3.1 (1.8–4.9)     | -62.6% (-71.6 to -49.3%) |
|                                            | Subarachnoid haemorrhage                | 8.5% (5.4–11.9%)   | 10.6 (4.6–19.9)        | -67.3% (-78.7 to -39.5%) | 9.7% (6.4–13.3%)   | 0.4 (0.2–0.8)     | -64.1% (-75.9 to -30.1%) |
| Low birth weight                           | Meningitis                              | 4.6% (2.6–7.7%)    | 4.6 (2.4–8.4)          | -86.7% (-93.2 to -75.9%) | 2.8% (1.5–5.1%)    | 0.1 (0–0.1)       | -86.7% (-93.2 to -75.9%) |

**Table S16** Regional and national disabilities and deaths related to neurological conditions attributable to risk factors in North Africa and Middle East countries

| Location<br>Risk factor (alphabetic order) |                                         | DALYs (95% UI)     |                        |                           | Deaths (95% UI)    |                  |                           |
|--------------------------------------------|-----------------------------------------|--------------------|------------------------|---------------------------|--------------------|------------------|---------------------------|
|                                            |                                         | PAF (%)            | Rate per 100,000       | Rate change (%)           | PAF (%)            | Rate per 100,000 | Rate change (%)           |
| Cause                                      |                                         | 2019               | 2019                   | From 1990 to 2019         | 2019               | 2019             | From 1990 to 2019         |
| Low birth weight and short gestation       | Encephalitis                            | 1.9% (0.9–3.6%)    | 0.6 (0.3–1)            | -21.7% (-67.4 to 102.5%)  | 1.3% (0.6–2.5%)    | <0.1 (<0.1–<0.1) | -21.7% (-67.4 to 102.5%)  |
|                                            | Meningitis                              | 5% (2.8–8.3%)      | 5 (2.6–9.1)            | -86.4% (-93 to -75%)      | 3% (1.6–5.5%)      | 0.1 (0–0.1)      | -86.4% (-93 to -75%)      |
| Low physical activity                      | Encephalitis                            | 2% (1–3.9%)        | 0.6 (0.3–1)            | -20.4% (-66.6 to 104.2%)  | 1.4% (0.7–2.7%)    | <0.1 (<0.1–<0.1) | -20.4% (-66.6 to 104.2%)  |
|                                            | Stroke                                  | 7.9% (2–14.6%)     | 203.9 (52.2–391.6)     | 16.4% (-5.1 to 43.8%)     | 9.4% (2.7–16.5%)   | 11.7 (3.4–21.3)  | 9% (-11.5 to 35.3%)       |
| Low temperature                            | Ischaemic stroke                        | 12.1% (3.1–22.5%)  | 203.9 (52.2–391.6)     | 16.4% (-5.1 to 43.8%)     | 13% (3.7–22.8%)    | 11.7 (3.4–21.3)  | 9% (-11.5 to 35.3%)       |
|                                            | Stroke                                  | 2.3% (-1.2–5.5%)   | 59.2 (-32.7–151.3)     | -34.1% (-118.1 to 30.3%)  | 2.6% (-1.3–6.1%)   | 3.2 (-1.7–8.1)   | -27.4% (-120.4 to 41.1%)  |
| Metabolic risk factors†                    | Ischaemic stroke                        | 2.2% (-1.1–5.3%)   | 37.5 (-19.9–94.6)      | 9.4% (-132.3 to 121.6%)   | 2.6% (-1.3–6.1%)   | 2.3 (-1.2–5.9)   | 8% (-132.6 to 114.5%)     |
|                                            | Intracerebral haemorrhage               | 2.4% (-1.3–5.8%)   | 18.8 (-10.1–49)        | -60.3% (-109.8 to -18.9%) | 2.6% (-1.3–6.1%)   | 0.8 (-0.4–2)     | -60.4% (-109.7 to -18.9%) |
|                                            | Subarachnoid haemorrhage                | 2.4% (-1.2–5.6%)   | 2.9 (-1.3–8.2)         | -64.4% (-108.9 to -9.4%)  | 2.6% (-1.3–6.1%)   | 0.1 (-0.1–0.3)   | -62.4% (-109.7 to -7.8%)  |
|                                            | Stroke                                  | 78.3% (71.8–84.3%) | 2024.1 (1510.3–2822.9) | -21.3% (-37.1 to -0.5%)   | 76.1% (67.7–85.2%) | 95.3 (68–137.2)  | -18.8% (-34.1 to 2.6%)    |
|                                            | Ischaemic stroke                        | 78.8% (70.6–87.6%) | 1333.9 (987.6–1858.1)  | 26.6% (2.1 to 59.6%)      | 75.4% (64.3–88.5%) | 68 (47.8–101.8)  | 21.7% (-2.4 to 55.8%)     |
|                                            | Intracerebral haemorrhage               | 78% (70.6–83.6%)   | 600.9 (408.3–849.5)    | -54.4% (-65.9 to -37.6%)  | 78.6% (70.2–85.4%) | 23.9 (16.3–33.5) | -55.4% (-65.9 to -39.5%)  |
| Non-optimal temperature                    | Subarachnoid haemorrhage                | 72.6% (63.4–80.1%) | 89.2 (51.2–150.1)      | -55.6% (-71.1 to -17%)    | 74.9% (65.6–83.4%) | 3.3 (1.7–5.8)    | -57% (-71.5 to -16.5%)    |
|                                            | Neurological disorders*                 | 7.3% (2.3–16.4%)   | 96.8 (29.8–247.7)      | 84.9% (50.9 to 163.6%)    | 18.4% (7.1–32.8%)  | 6.2 (1.1–19.9)   | 84.3% (46.3 to 172.4%)    |
|                                            | Alzheimer's disease and other dementias | 26.4% (12.3–43.3%) | 96.8 (29.8–247.7)      | 84.9% (50.9 to 163.6%)    | 25.9% (11.7–43.1%) | 6.2 (1.1–19.9)   | 84.3% (46.3 to 172.4%)    |
|                                            | Stroke                                  | 6.1% (2.1–9.9%)    | 157.8 (54.9–295.8)     | -28.8% (-66.2 to 9.2%)    | 6.8% (2.3–11%)     | 8.6 (3–15.9)     | -21.6% (-61.4 to 21%)     |
|                                            | Ischaemic stroke                        | 5.9% (2–9.6%)      | 100.1 (31.6–189.8)     | 17.9% (-42.6 to 85.7%)    | 6.8% (2.3–11%)     | 6.2 (2–11.5)     | 16.4% (-42.1 to 86.3%)    |
|                                            | Intracerebral haemorrhage               | 6.5% (2.2–10.5%)   | 49.9 (16.7–91.2)       | -57.1% (-80.3 to -29.9%)  | 6.8% (2.3–11%)     | 2.1 (0.7–3.9)    | -57.2% (-78.8 to -29.6%)  |
| Other environmental risks                  | Subarachnoid haemorrhage                | 6.2% (2.2–10.2%)   | 7.8 (2.1–16.8)         | -61.4% (-82.8 to -15.5%)  | 6.8% (2.3–11%)     | 0.3 (0.1–0.7)    | -59.2% (-81 to -6.2%)     |
|                                            | Stroke                                  | 8.9% (6.4–11.5%)   | 230.7 (144.7–348.1)    | -38.6% (-52.1 to -21.3%)  | 9% (6.4–11.8%)     | 11.3 (7.1–17.4)  | -29.9% (-45.4 to -9.9%)   |
|                                            | Ischaemic stroke                        | 8.8% (6.1–11.7%)   | 148.4 (90.6–227.8)     | 10.5% (-13.1 to 39.3%)    | 8.6% (5.9–11.9%)   | 7.8 (4.6–12.6)   | 16.1% (-9 to 46.1%)       |
|                                            | Intracerebral haemorrhage               | 9.3% (6.1–12.6%)   | 71.8 (41.9–112.1)      | -65.7% (-75.2 to -53.2%)  | 10% (6.8–13.8%)    | 3.1 (1.8–4.9)    | -62.6% (-71.6 to -49.3%)  |
| Particulate matter pollution               | Subarachnoid haemorrhage                | 8.5% (5.4–11.9%)   | 10.6 (4.6–19.9)        | -67.3% (-78.7 to -39.5%)  | 9.7% (6.4–13.3%)   | 0.4 (0.2–0.8)    | -64.1% (-75.9 to -30.1%)  |
|                                            | Meningitis                              | 1.2% (0.6–2.2%)    | 1.2 (0.5–2.2)          | -90.2% (-95.6 to -79.7%)  | 0.7% (0.3–1.4%)    | <0.1 (<0.1–<0.1) | -90.2% (-95.6 to -79.7%)  |
|                                            | Encephalitis                            | 0.5% (0.2–1.1%)    | 0.2 (0.1–0.3)          | -39.4% (-77 to 76.3%)     | 0.3% (0.1–0.7%)    | <0.1 (<0.1–<0.1) | -39.4% (-77.1 to 76.4%)   |
|                                            | Stroke                                  | 36.3% (31.1–40.6%) | 938.9 (668–1337.9)     | -44% (-57.4 to -25.9%)    | 32.1% (27.3–36.1%) | 40.2 (28.3–59.3) | -45.2% (-59.6 to -26.4%)  |
|                                            | Ischaemic stroke                        | 35.2% (30.2–39.4%) | 596.3 (430.8–861.6)    | -9.3% (-32.4 to 20.7%)    | 30.8% (26.1–34.6%) | 27.8 (19.7–40.7) | -17.8% (-40.4 to 11.2%)   |
|                                            | Intracerebral haemorrhage               | 38.5% (33.2–42.9%) | 296.8 (196–425.8)      | -66.2% (-75.6 to -52.7%)  | 35.5% (30.3–39.8%) | 10.8 (7.1–15.2)  | -68.5% (-77.4 to -55.8%)  |
| Secondhand smoke                           | Subarachnoid haemorrhage                | 37.3% (32–42.2%)   | 45.8 (25.3–77.9)       | -67.1% (-79.3 to -37.3%)  | 35.2% (29.9–39.8%) | 1.6 (0.8–2.8)    | -69.7% (-80.7 to -38.3%)  |
|                                            | Stroke                                  | 3.4% (2.6–4.3%)    | 89.4 (59.9–131.4)      | -41.1% (-55.2 to -22.1%)  | 2.9% (2.2–3.6%)    | 3.6 (2.4–5.3)    | -39.8% (-52.6 to -21.8%)  |
|                                            | Ischaemic stroke                        | 3.1% (2.4–3.9%)    | 53.3 (35.3–79.6)       | 2.7% (-19.9 to 34.6%)     | 2.7% (2–3.4%)      | 2.4 (1.6–3.6)    | -4.8% (-24.5 to 21.6%)    |
|                                            | Intracerebral haemorrhage               | 4% (3.1–5%)        | 31.2 (19.4–48)         | -63.7% (-74.4 to -49.3%)  | 3.5% (2.6–4.3%)    | 1.1 (0.7–1.6)    | -64.9% (-74.4 to -51.6%)  |

**Table S16** Regional and national disabilities and deaths related to neurological conditions attributable to risk factors in North Africa and Middle East countries

| Location<br>Risk factor (alphabetic order) | Cause                                   | DALYs (95% UI)      |                        |                          | Deaths (95% UI)     |                         |                          |
|--------------------------------------------|-----------------------------------------|---------------------|------------------------|--------------------------|---------------------|-------------------------|--------------------------|
|                                            |                                         | PAF (%)             | Rate per 100,000       | Rate change (%)          | PAF (%)             | Rate per 100,000        | Rate change (%)          |
|                                            |                                         | 2019                | 2019                   | From 1990 to 2019        | 2019                | 2019                    | From 1990 to 2019        |
| Short gestation                            | Subarachnoid haemorrhage                | 4% (3–5·1%)         | 4·9 (2·6–8·6)          | -65·1% (-78·4 to -33·7%) | 3·5% (2·6–4·5%)     | 0·2 (0·1–0·3)           | -66·6% (-78·9 to -34·1%) |
|                                            | Meningitis                              | 2·8% (1·6–4·6%)     | 2·8 (1·5–5·1)          | -83·9% (-91·6 to -71·2%) | 1·7% (0·9–3·1%)     | <0·1 (<0·1–0·1)         | -83·9% (-91·6 to -71·2%) |
|                                            | Encephalitis                            | 1·2% (0·6–2·2%)     | 0·3 (0·2–0·6)          | -6·6% (-61·9 to 137·7%)  | 0·8% (0·4–1·5%)     | <0·1 (<0·1–<0·1)        | -6·6% (-61·9 to 137·7%)  |
| Smoking                                    | Stroke                                  | 11·8% (9·7–14·1%)   | 306·3 (210·2–445·3)    | -37·8% (-54·6 to -15·8%) | 9% (7·3–10·9%)      | 11·4 (7·7–16·8)         | -37·4% (-54·1 to -15·7%) |
|                                            | Ischaemic stroke                        | 11% (9–13·2%)       | 186·6 (127·8–291·9)    | 8·5% (-21·3 to 47·3%)    | 8·1% (6·5–10%)      | 7·4 (5–11·7)            | 3·9% (-26·1 to 44·4%)    |
|                                            | Intracerebral haemorrhage               | 13·5% (10·6–16·8%)  | 104·4 (65·4–158·9)     | -62·6% (-74·4 to -44·6%) | 11·4% (8·7–14·3%)   | 3·5 (2·1–5·3)           | -63·7% (-74·7 to -47·1%) |
| Tobacco                                    | Subarachnoid haemorrhage                | 12·1% (8·4–16%)     | 15·2 (6·9–30·2)        | -63·5% (-77·6 to -22·5%) | 10·8% (7–14·6%)     | 0·5 (0·2–1)             | -65·1% (-78·4 to -23·1%) |
|                                            | Neurological disorders*                 | 3·6% (1·2–8%)       | 48 (14·2–122·2)        | -1·2% (-21·5 to 25·8%)   | 7·8% (1·9–14%)      | 2·8 (0·3–8·8)           | -2·5% (-28·7 to 38·7%)   |
|                                            | Alzheimer's disease and other dementias | 14·8% (8·9–21·3%)   | 54·4 (20·4–131·1)      | -3·5% (-23·1 to 20·4%)   | 13·2% (7·6–19·1%)   | 3·2 (0·6–9·1)           | -3·6% (-26·7 to 24·9%)   |
|                                            | Parkinson's disease                     | -8·8% (-13·2–-4·8%) | -7·5 (-12·2–-4)        | -15% (-41·1 to 31·7%)    | -8·1% (-12·5–-4·4%) | -0·4 (-0·7–0·2)         | -10·1% (-38·8 to 43·2%)  |
|                                            | Multiple sclerosis                      | 8·6% (5·6–12%)      | 1·2 (0·7–1·9)          | 5·8% (-31·7 to 50·8%)    | 9·8% (6–14·1%)      | <0·1 (<0·1–<0·1)        | 5·6% (-44·3 to 72·1%)    |
|                                            | Stroke                                  | 14·8% (12·5–17·2%)  | 383·9 (269·7–549·8)    | -38·3% (-54 to -18%)     | 11·6% (9·7–13·5%)   | 14·6 (9·9–21·6)         | -37·7% (-53·1 to -18%)   |
|                                            | Ischaemic stroke                        | 13·7% (11·6–16·1%)  | 233·3 (163–351·8)      | 7·4% (-19·8 to 44·3%)    | 10·5% (8·8–12·4%)   | 9·5 (6·6–14·6)          | 1·8% (-24·4 to 38%)      |
|                                            | Intracerebral haemorrhage               | 17% (14–20·2%)      | 131·2 (83·3–194·5)     | -62·7% (-74·1 to -45·6%) | 14·5% (11·7–17·3%)  | 4·4 (2·8–6·5)           | -63·9% (-74·4 to -48·6%) |
|                                            | Subarachnoid haemorrhage                | 15·6% (11·9–19·3%)  | 19·5 (9·5–36·9)        | -63·8% (-77·5 to -27·7%) | 13·9% (10·2–17·6%)  | 0·6 (0·3–1·2)           | -65·4% (-78·2 to -27·6%) |
|                                            | Neurological disorders*                 | 3·6% (1·2–8%)       | 48 (14·2–122·2)        | -1·2% (-21·5 to 25·8%)   | 7·8% (1·9–14%)      | 2·8 (0·3–8·8)           | -2·5% (-28·7 to 38·7%)   |
| Alzheimer's disease and other dementias    | 14·8% (8·9–21·3%)                       | 54·4 (20·4–131·1)   | -3·5% (-23·1 to 20·4%) | 13·2% (7·6–19·1%)        | 3·2 (0·6–9·1)       | -3·6% (-26·7 to 24·9%)  |                          |
| Parkinson's disease                        | -8·8% (-13·2–-4·8%)                     | -7·5 (-12·2–-4)     | -15% (-41·1 to 31·7%)  | -8·1% (-12·5–-4·4%)      | -0·4 (-0·7–0·2)     | -10·1% (-38·8 to 43·2%) |                          |
| Multiple sclerosis                         | 8·6% (5·6–12%)                          | 1·2 (0·7–1·9)       | 5·8% (-31·7 to 50·8%)  | 9·8% (6–14·1%)           | <0·1 (<0·1–<0·1)    | 5·6% (-44·3 to 72·1%)   |                          |

Data in parentheses are 95% uncertainty intervals. Rate data per 100,000 and percentage data are rounded to one decimal place. Percentages of DALYs are not mutually exclusive: the sum of percentages of DALYs in the columns exceeds the totals for all risk factors combined because of overlap between various risk factors. The crude sum of population attributable fraction (PAF) of the risk factors might exceed 100% because the effects of many of these risk factors are mediated partly or fully through another risk factor or risk factors. DALY=disability-adjusted life-year. PM<sub>2.5</sub>=particulate matter with a diameter of <25 µm. \*Neurological disorders in the Global Burden of Disease Study 2019 include Alzheimer's disease and other dementias, Parkinson's disease, idiopathic epilepsy, multiple sclerosis, headache disorders (including migraine and tension-type headache), motor neuron disease, and other neurological disorders. Metabolic risk factors† cluster includes high body-mass index, high fasting plasma glucose, high LDL cholesterol, high systolic blood pressure, and kidney dysfunction. ‡Behavioural risk factors cluster includes tobacco (including smoking and second-hand smoking), dietary risks (diet high in sodium, diet low in fruits, diet low in vegetables, diet high in red meat, and diet low in whole grains), low physical activity, alcohol consumption, and child and maternal malnutrition (including low birth weight and short gestation). §Environmental risk factors cluster includes air pollution (including ambient PM<sub>2.5</sub> pollution and household air pollution from solid fuels), non-optimal temperature (including low ambient temperature and high ambient temperature), and other environmental risks (including lead exposure). Risk factors with insufficient data are not reported here.

***Table S17 Age-specific disability and death related to neurological conditions (NCs) in North Africa and Middle East countries in 2019***  
(NEXT PAGE)

**Table S17** Age-specific disability and death related to neurological conditions (NCs)\* in North Africa and Middle East countries in 2019

|                                               |                       | <b>Under 5</b>               | <b>5-14 years</b>           | <b>15-49 years</b>            | <b>50-69 years</b>           | <b>70+ years</b>              |
|-----------------------------------------------|-----------------------|------------------------------|-----------------------------|-------------------------------|------------------------------|-------------------------------|
|                                               |                       | Mean (95% UI)                | Mean (95% UI)               | Mean (95% UI)                 | Mean (95% UI)                | Mean (95% UI)                 |
| <b>DALYs (Disability-Adjusted Life Years)</b> |                       |                              |                             |                               |                              |                               |
| Global                                        | Number                | 16605633 (12900218–21704624) | 11182406 (6838747–17433172) | 70848156 (41725263–112830549) | 82296089 (69409585–98883050) | 92131170 (74791237–121617720) |
|                                               | Percent (all-cause)†  | 3·5% (2·9–4·4%)              | 9·5% (5·7–14·5%)            | 9% (5·2–13·9%)                | 12·2% (10·1–14·6%)           | 19% (15·4–25·2%)              |
|                                               | Percent (proportion)‡ | 6·1%                         | 4·1%                        | 25·9%                         | 30·1%                        | 33·7%                         |
| North Africa and Middle East                  | Number                | 797643 (542482–1151776)      | 1060594 (559933–1869084)    | 6228226 (3408366–10432270)    | 4423367 (3517269–5550477)    | 4059720 (3240436–5508356)     |
|                                               | Percent (all-cause)†  | 2·8% (2–3·9%)                | 11·2% (5·9–18·6%)           | 9·9% (5·5–15·7%)              | 10·9% (8·9–13·4%)            | 17·9% (14·5–24·3%)            |
|                                               | Percent (proportion)‡ | 4·8%                         | 6·4%                        | 37·6%                         | 26·7%                        | 24·5%                         |
| Algeria                                       | Number                | 27101 (15223–44949)          | 55654 (24729–107594)        | 378902 (193276–663212)        | 285076 (205640–384834)       | 340712 (254537–485493)        |
|                                               | Percent (all-cause)†  | 1·6% (0·9–2·6%)              | 10·7% (4·9–19%)             | 10% (5·2–16·7%)               | 11·6% (8·8–15·4%)            | 19·9% (15·5–27·8%)            |
|                                               | Percent (proportion)‡ | 2·5%                         | 5·1%                        | 34·8%                         | 26·2%                        | 31·3%                         |
| Bahrain                                       | Number                | 340 (199–534)                | 1206 (465–2308)             | 13511 (6647–23530)            | 7028 (4797–10236)            | 3377 (2464–5139)              |
|                                               | Percent (all-cause)†  | 3·5% (2·1–5·4%)              | 12·2% (5·2–21%)             | 9·5% (4·8–15·4%)              | 7·3% (5·2–10·3%)             | 11·7% (9–17·6%)               |
|                                               | Percent (proportion)‡ | 1·3%                         | 4·7%                        | 53·1%                         | 27·6%                        | 13·3%                         |
| Egypt                                         | Number                | 199086 (87725–360822)        | 246543 (106580–452385)      | 1042873 (533696–1790894)      | 790771 (546779–1154184)      | 481318 (335229–728958)        |
|                                               | Percent (all-cause)†  | 6·2% (2·9–11·1%)             | 14·7% (6·4–25·7%)           | 11·5% (6–18·7%)               | 9·2% (6·9–12·6%)             | 12·8% (9·4–18·9%)             |
|                                               | Percent (proportion)‡ | 7·2%                         | 8·9%                        | 37·8%                         | 28·6%                        | 17·4%                         |
| Iran                                          | Number                | 38235 (23464–55577)          | 104897 (53514–179251)       | 804469 (402305–1392492)       | 558351 (430278–709880)       | 654516 (501331–914052)        |
|                                               | Percent (all-cause)†  | 2·5% (1·6–3·5%)              | 11·2% (5·7–18%)             | 9·4% (4·7–15·4%)              | 10·5% (8–13·5%)              | 18·5% (14·2–25·8%)            |
|                                               | Percent (proportion)‡ | 1·8%                         | 4·9%                        | 37·2%                         | 25·8%                        | 30·3%                         |
| Iraq                                          | Number                | 50570 (28435–83370)          | 88491 (44666–157494)        | 481145 (260209–822400)        | 362735 (263602–476746)       | 278210 (218221–363373)        |
|                                               | Percent (all-cause)†  | 3·4% (2·1–5·2%)              | 12·1% (6·1–20·3%)           | 10·7% (6–17%)                 | 15·1% (12·5–18·3%)           | 23·7% (19·7–30·3%)            |
|                                               | Percent (proportion)‡ | 4·0%                         | 7·0%                        | 38·2%                         | 28·8%                        | 22·1%                         |
| Jordan                                        | Number                | 6975 (4105–11479)            | 18721 (7972–35650)          | 90389 (41565–165624)          | 53791 (39599–72764)          | 51367 (39003–70616)           |
|                                               | Percent (all-cause)†  | 1·9% (1·3–3%)                | 11·3% (5–20·1%)             | 10·3% (4·9–17·3%)             | 11% (8·3–14·3%)              | 19·9% (15·4–27%)              |
|                                               | Percent (proportion)‡ | 3·2%                         | 8·5%                        | 40·9%                         | 24·3%                        | 23·2%                         |
| Kuwait                                        | Number                | 1531 (920–2480)              | 4125 (1751–7667)            | 42198 (19565–75801)           | 15903 (11116–22440)          | 14610 (10345–21911)           |
|                                               | Percent (all-cause)†  | 2·7% (1·6–4·2%)              | 12·3% (5·4–21%)             | 10·1% (4·8–16·9%)             | 9·1% (6·5–12·4%)             | 18·7% (13·5–28%)              |
|                                               | Percent (proportion)‡ | 2·0%                         | 5·3%                        | 53·8%                         | 20·3%                        | 18·6%                         |
| Lebanon                                       | Number                | 2259 (1011–4364)             | 6217 (2357–12241)           | 40486 (17825–74208)           | 24495 (16350–35866)          | 44814 (29623–72053)           |
|                                               | Percent (all-cause)†  | 2·2% (1·4–2%)                | 12·3% (4·9–22·2%)           | 8·8% (4–15·3%)                | 6·5% (4·4–9·3%)              | 12·4% (8·2–19·9%)             |
|                                               | Percent (proportion)‡ | 1·9%                         | 5·3%                        | 34·2%                         | 20·7%                        | 37·9%                         |
| Libya                                         | Number                | 4145 (2169–6781)             | 8279 (3486–15797)           | 77104 (40134–132215)          | 44686 (31379–62634)          | 44606 (30684–69379)           |
|                                               | Percent (all-cause)†  | 3·7% (2·1–5·7%)              | 10·4% (4·6–18·6%)           | 9·1% (4·9–14·9%)              | 10·3% (7·7–13·7%)            | 18·7% (13·5–28·9%)            |
|                                               | Percent (proportion)‡ | 2·3%                         | 4·6%                        | 43·1%                         | 25·0%                        | 24·9%                         |
| Morocco                                       | Number                | 30483 (11698–71678)          | 48497 (18451–93127)         | 336344 (162714–610367)        | 391366 (281291–522867)       | 353357 (268261–493509)        |
|                                               | Percent (all-cause)†  | 2·8% (1·2–6·3%)              | 10·8% (4·3–19·6%)           | 9·7% (5–16·2%)                | 11·8% (9·3–14·9%)            | 19·6% (15·5–27·4%)            |
|                                               | Percent (proportion)‡ | 2·6%                         | 4·2%                        | 29·0%                         | 33·7%                        | 30·5%                         |
| Palestine                                     | Number                | 4150 (2522–6451)             | 9818 (4480–18271)           | 39996 (19833–70390)           | 26740 (20800–34333)          | 26315 (21058–34920)           |
|                                               | Percent (all-cause)†  | 2·7% (1·7–3·9%)              | 12% (5·5–20·6%)             | 10% (5·1–16·2%)               | 11·4% (9·1–14·2%)            | 20·8% (17·1–26·9%)            |
|                                               | Percent (proportion)‡ | 3·9%                         | 9·2%                        | 37·4%                         | 25·0%                        | 24·6%                         |
| Oman                                          | Number                | 3584 (1887–6338)             | 4994 (2086–9573)            | 44419 (20714–81041)           | 16192 (11914–21988)          | 12629 (9918–16987)            |
|                                               | Percent (all-cause)†  | 4·2% (2·3–7·2%)              | 11·4% (4·8–20·3%)           | 9·1% (4·3–15·6%)              | 9·8% (7·2–13·2%)             | 16·2% (12·9–21·8%)            |
|                                               | Percent (proportion)‡ | 4·4%                         | 6·1%                        | 54·3%                         | 19·8%                        | 15·4%                         |
| Qatar                                         | Number                | 657 (360–1113)               | 1883 (774–3572)             | 27488 (13015–49977)           | 6539 (4273–9735)             | 1770 (1262–2673)              |
|                                               | Percent (all-cause)†  | 2·9% (1·7–4·8%)              | 12·1% (5·3–21·2%)           | 9·1% (4·4–15·4%)              | 6·9% (4·8–10%)               | 9·5% (7·1–14·2%)              |
|                                               | Percent (proportion)‡ | 1·7%                         | 4·9%                        | 71·7%                         | 17·1%                        | 4·6%                          |
| Saudi Arabia                                  | Number                | 8050 (3436–16522)            | 33883 (12397–67862)         | 488935 (269752–805802)        | 237098 (170507–310376)       | 105240 (78234–143422)         |

**Table S17** Age-specific disability and death related to neurological conditions (NCs)\* in North Africa and Middle East countries in 2019

|                              |                       | Under 5                | 5-14 years            | 15-49 years             | 50-69 years               | 70+ years                 |  |
|------------------------------|-----------------------|------------------------|-----------------------|-------------------------|---------------------------|---------------------------|--|
|                              |                       | Mean (95% UI)          | Mean (95% UI)         | Mean (95% UI)           | Mean (95% UI)             | Mean (95% UI)             |  |
| Syrian Arab Republic         | Percent (all-cause)†  | 2.7% (1.2–5.5%)        | 13.1% (5.3–23.6%)     | 9.4% (5.4–14.6%)        | 11.6% (8.5–14.5%)         | 19.2% (14.5–25.8%)        |  |
|                              | Percent (proportion)‡ | 0.9%                   | 3.9%                  | 56.0%                   | 27.2%                     | 12.1%                     |  |
|                              | Number                | 11539 (6642–18505)     | 31145 (15993–54933)   | 144354 (75022–250248)   | 143567 (99881–203993)     | 110866 (81402–158425)     |  |
| Tunisia                      | Percent (all-cause)†  | 3.5% (2.2–5.4%)        | 11.4% (5.9–19.1%)     | 10.7% (5.8–17.1%)       | 11% (8.7–13.9%)           | 16.3% (13.1–22.4%)        |  |
|                              | Percent (proportion)‡ | 2.6%                   | 7.1%                  | 32.7%                   | 32.5%                     | 25.1%                     |  |
|                              | Number                | 4274 (2287–7097)       | 11960 (4576–23646)    | 94897 (42577–170592)    | 99201 (67282–139873)      | 132160 (92074–199141)     |  |
| Türkiye                      | Percent (all-cause)†  | 2.2% (1.2–3.6%)        | 11% (4.5–20.2%)       | 9.7% (4.6–16.2%)        | 10.8% (8.1–14.3%)         | 19.5% (14.7–27.7%)        |  |
|                              | Percent (proportion)‡ | 1.2%                   | 3.5%                  | 27.7%                   | 29.0%                     | 38.6%                     |  |
|                              | Number                | 52857 (35218–75744)    | 95807 (43009–168545)  | 733340 (361548–1268878) | 628628 (442893–860076)    | 878505 (628258–1305538)   |  |
| United Arab Emirates         | Percent (all-cause)†  | 3.5% (2.4–4.9%)        | 14% (6.9–22.7%)       | 11% (5.6–17.7%)         | 10.3% (7.7–13.4%)         | 18.5% (13.9–26.5%)        |  |
|                              | Percent (proportion)‡ | 2.2%                   | 4.0%                  | 30.7%                   | 26.3%                     | 36.8%                     |  |
|                              | Number                | 1694 (738–3196)        | 6821 (2766–12971)     | 146946 (82016–242462)   | 57117 (39645–79112)       | 7581 (5489–10795)         |  |
| Yemen                        | Percent (all-cause)†  | 4.6% (2.1–8.5%)        | 13.7% (5.9–24.1%)     | 10% (6.1–16%)           | 10.6% (7.9–14.3%)         | 15.7% (11.9–22.4%)        |  |
|                              | Percent (proportion)‡ | 0.8%                   | 3.1%                  | 66.7%                   | 25.9%                     | 3.4%                      |  |
|                              | Number                | 56801 (29003–100601)   | 72627 (31297–138071)  | 297179 (142806–526477)  | 192754 (140153–268514)    | 147798 (106843–208570)    |  |
| Afghanistan                  | Percent (all-cause)†  | 1.3% (0.7–2.3%)        | 7% (3.2–12.6%)        | 7.3% (3.7–12.1%)        | 12.6% (9.6–16.2%)         | 19.3% (14.2–27%)          |  |
|                              | Percent (proportion)‡ | 7.4%                   | 9.5%                  | 38.7%                   | 25.1%                     | 19.3%                     |  |
|                              | Number                | 194746 (101477–367959) | 112288 (52195–212965) | 492049 (278048–820164)  | 236803 (159072–330329)    | 148738 (97288–217702)     |  |
| Sudan                        | Percent (all-cause)†  | 2.6% (1.4–4.7%)        | 8.7% (4.1–15.9%)      | 9% (5.5–14%)            | 11.6% (8.5–15.1%)         | 17% (11.5–24.2%)          |  |
|                              | Percent (proportion)‡ | 16.4%                  | 9.5%                  | 41.5%                   | 20.0%                     | 12.6%                     |  |
|                              | Number                | 97753 (47171–175224)   | 95660 (42990–180127)  | 404875 (190045–734098)  | 240032 (167704–346506)    | 217106 (154628–324852)    |  |
| Deaths                       | Percent (all-cause)†  | 2.1% (1.1–3.4%)        | 10.1% (4.7–17.6%)     | 9.9% (5–16.9%)          | 13% (9.5–18%)             | 19.8% (14.3–29%)          |  |
|                              | Percent (proportion)‡ | 9.3%                   | 9.1%                  | 38.4%                   | 22.7%                     | 20.6%                     |  |
|                              | Number                |                        |                       |                         |                           |                           |  |
| Global                       | Number                | 178082 (138244–233183) | 62789 (51146–77721)   | 585522 (523590–654541)  | 2188785 (1938806–2552982) | 6365925 (4768855–9097901) |  |
| North Africa and Middle East | Percent (all-cause)†  | 3.5% (3–4.3%)          | 9.3% (7.7–11.3%)      | 7.9% (7.3–8.6%)         | 14.6% (13.4–16.6%)        | 22.4% (16.8–32%)          |  |
|                              | Percent (proportion)‡ | 1.9%                   | 0.7%                  | 6.2%                    | 23.3%                     | 67.9%                     |  |
|                              | Number                | 7896 (5248–11524)      | 4988 (3682–6573)      | 45180 (36559–55093)     | 110829 (91513–138296)     | 272220 (203156–396516)    |  |
| Algeria                      | Percent (all-cause)†  | 2.6% (1.8–3.7%)        | 10.2% (7.6–13.1%)     | 8.8% (7.7–9.9%)         | 12.2% (10.8–14.4%)        | 20.5% (15.4–30%)          |  |
|                              | Percent (proportion)‡ | 1.8%                   | 1.1%                  | 10.2%                   | 25.1%                     | 61.7%                     |  |
|                              | Number                | 227 (134–358)          | 184 (116–270)         | 2327 (1699–3103)        | 6739 (4805–9466)          | 23518 (16432–35774)       |  |
| Bahrain                      | Percent (all-cause)†  | 1.3% (0.8–2%)          | 7.3% (4.7–10.5%)      | 8.3% (6.5–10.4%)        | 13.7% (10.8–18.3%)        | 22.6% (16.5–33.4%)        |  |
|                              | Percent (proportion)‡ | 0.7%                   | 0.6%                  | 7.1%                    | 20.4%                     | 71.3%                     |  |
|                              | Number                | 2 (2–3)                | 3 (2–4)               | 63 (47–83)              | 128 (89–199)              | 202 (135–334)             |  |
| Egypt                        | Percent (all-cause)†  | 2.8% (2.1–3.7%)        | 8.7% (6.3–11.8%)      | 7.5% (6.1–8.9%)         | 7.5% (5.7–11%)            | 12.8% (9–21.2%)           |  |
|                              | Percent (proportion)‡ | 0.6%                   | 0.7%                  | 15.9%                   | 32.2%                     | 50.6%                     |  |
|                              | Number                | 2018 (914–3649)        | 1413 (799–2351)       | 8120 (5759–11256)       | 20430 (13432–31142)       | 28338 (17831–46810)       |  |
| Iran                         | Percent (all-cause)†  | 6.2% (3–11.3%)         | 16.9% (10–27.3%)      | 10.4% (8.2–13.1%)       | 9.1% (6.8–13%)            | 13% (8.6–21.1%)           |  |
|                              | Percent (proportion)‡ | 3.3%                   | 2.3%                  | 13.5%                   | 33.9%                     | 47.0%                     |  |
|                              | Number                | 291 (169–419)          | 399 (286–489)         | 4368 (3634–5025)        | 12634 (10376–15532)       | 45863 (32101–69411)       |  |
| Iraq                         | Percent (all-cause)†  | 1.9% (1.1–2.6%)        | 9.1% (6.6–11%)        | 7.5% (6.3–8.6%)         | 12.4% (10.3–15.1%)        | 21.7% (15.1–32.8%)        |  |
|                              | Percent (proportion)‡ | 0.5%                   | 0.6%                  | 6.9%                    | 19.9%                     | 72.2%                     |  |
|                              | Number                | 488 (285–793)          | 465 (331–629)         | 4165 (2960–5824)        | 10105 (7367–13263)        | 18437 (13830–25067)       |  |
| Jordan                       | Percent (all-cause)†  | 3.3% (2.1–4.7%)        | 12.6% (9.2–16.6%)     | 11% (9.4–13.2%)         | 18.2% (16.1–21%)          | 27.3% (21.8–37%)          |  |
|                              | Percent (proportion)‡ | 1.4%                   | 1.4%                  | 12.4%                   | 30.0%                     | 54.8%                     |  |
|                              | Number                | 56 (37–85)             | 53 (40–71)            | 355 (274–445)           | 1181 (884–1594)           | 3142 (2176–4605)          |  |
|                              | Percent (all-cause)†  | 1.5% (1.2–2%)          | 7.6% (5.8–9.8%)       | 7.3% (6–8.6%)           | 12.6% (9.9–15.8%)         | 23% (16.3–33.2%)          |  |

**Table S17** Age-specific disability and death related to neurological conditions (NCs)\* in North Africa and Middle East countries in 2019

|                      |                       | <b>Under 5</b>   | <b>5-14 years</b>  | <b>15-49 years</b> | <b>50-69 years</b>  | <b>70+ years</b>     |
|----------------------|-----------------------|------------------|--------------------|--------------------|---------------------|----------------------|
|                      |                       | Mean (95% UI)    | Mean (95% UI)      | Mean (95% UI)      | Mean (95% UI)       | Mean (95% UI)        |
| Kuwait               | Percent (proportion)‡ | 1.2%             | 1.1%               | 7.4%               | 24.7%               | 65.6%                |
|                      | Number                | 11 (8–16)        | 11 (9–15)          | 176 (137–223)      | 294 (213–423)       | 1037 (634–1726)      |
|                      | Percent (all-cause)†  | 2% (1.5–2.6%)    | 9.9% (7.8–12.4%)   | 8.6% (7.1–10.2%)   | 10.6% (8.2–14.3%)   | 22.9% (14.1–38.2%)   |
| Lebanon              | Percent (proportion)‡ | 0.7%             | 0.7%               | 11.5%              | 19.2%               | 67.8%                |
|                      | Number                | 16 (7–32)        | 17 (10–28)         | 175 (112–257)      | 439 (269–717)       | 2935 (1547–5469)     |
|                      | Percent (all-cause)†  | 1.7% (0.8–3%)    | 10.5% (6.2–16.6%)  | 5.4% (3.8–7.6%)    | 5.4% (3.6–8.7%)     | 13.7% (7.2–25%)      |
| Libya                | Percent (proportion)‡ | 0.5%             | 0.5%               | 4.9%               | 12.3%               | 81.9%                |
|                      | Number                | 41 (21–67)       | 31 (20–45)         | 580 (406–808)      | 1053 (732–1506)     | 3100 (1873–5317)     |
|                      | Percent (all-cause)†  | 3.7% (2.1–5.6%)  | 8.2% (5.4–11.9%)   | 7.8% (6–10.2%)     | 11.7% (8.9–15.9%)   | 22.6% (14.2–38%)     |
| Morocco              | Percent (proportion)‡ | 0.9%             | 0.6%               | 12.1%              | 21.9%               | 64.5%                |
|                      | Number                | 282 (109–689)    | 147 (77–249)       | 2238 (1432–3595)   | 10411 (7319–14166)  | 24015 (17145–35496)  |
|                      | Percent (all-cause)†  | 2.5% (1.1–5.9%)  | 7.8% (4.1–12.8%)   | 8.2% (6–11.1%)     | 13.2% (10.8–16.8%)  | 22% (16.2–32.5%)     |
| Palestine            | Percent (proportion)‡ | 0.8%             | 0.4%               | 6.0%               | 28.1%               | 64.7%                |
|                      | Number                | 37 (24–56)       | 38 (28–55)         | 214 (169–262)      | 701 (559–893)       | 1788 (1363–2525)     |
|                      | Percent (all-cause)†  | 2.3% (1.7–3.2%)  | 12.3% (9.3–17.5%)  | 9.5% (7.9–11.1%)   | 13.8% (11.8–16.5%)  | 24.1% (19–32.9%)     |
| Oman                 | Percent (proportion)‡ | 1.3%             | 1.4%               | 7.7%               | 25.2%               | 64.4%                |
|                      | Number                | 33 (19–56)       | 20 (13–30)         | 218 (161–333)      | 389 (295–532)       | 779 (581–1112)       |
|                      | Percent (all-cause)†  | 4.1% (2.5–6.7%)  | 10.3% (6.5–15.5%)  | 6.3% (4.8–9.5%)    | 10.9% (8.6–14.9%)   | 17.8% (13.5–25.3%)   |
| Qatar                | Percent (proportion)‡ | 2.3%             | 1.4%               | 15.2%              | 27.0%               | 54.1%                |
|                      | Number                | 5 (3–7)          | 5 (3–7)            | 102 (72–146)       | 105 (67–175)        | 94 (61–157)          |
|                      | Percent (all-cause)†  | 2.1% (1.5–3%)    | 8.3% (6–11.1%)     | 6% (4.9–7.8%)      | 6.9% (5–10.8%)      | 10% (7–16.6%)        |
| Saudi Arabia         | Percent (proportion)‡ | 1.5%             | 1.6%               | 32.9%              | 33.8%               | 30.3%                |
|                      | Number                | 41 (20–87)       | 55 (35–90)         | 3946 (2772–5572)   | 5850 (4137–7728)    | 6836 (4704–9931)     |
|                      | Percent (all-cause)†  | 1.6% (0.8–3.2%)  | 7.3% (4.8–11.6%)   | 7.8% (6.3–9.5%)    | 13.1% (9.6–16.1%)   | 22.9% (15.8–33%)     |
| Syrian Arab Republic | Percent (proportion)‡ | 0.2%             | 0.3%               | 23.6%              | 35.0%               | 40.9%                |
|                      | Number                | 110 (67–171)     | 176 (132–237)      | 1114 (803–1540)    | 3715 (2566–5394)    | 7123 (4890–10986)    |
|                      | Percent (all-cause)†  | 3.4% (2.3–4.9%)  | 13.3% (10.3–17.4%) | 11% (9.4–12.5%)    | 12.4% (10.5–15.2%)  | 17.9% (13.7–26%)     |
| Tunisia              | Percent (proportion)‡ | 0.9%             | 1.4%               | 9.1%               | 30.4%               | 58.2%                |
|                      | Number                | 35 (19–54)       | 31 (20–48)         | 516 (345–725)      | 2400 (1614–3606)    | 9219 (5856–14847)    |
|                      | Percent (all-cause)†  | 1.8% (1.1–2.7%)  | 7.1% (4.6–10.5%)   | 7.7% (6.1–9.7%)    | 12.9% (10.1–16.9%)  | 23.1% (15.6–35.6%)   |
| Türkiye              | Percent (proportion)‡ | 0.3%             | 0.3%               | 4.2%               | 19.7%               | 75.6%                |
|                      | Number                | 488 (329–682)    | 368 (251–490)      | 3991 (2836–5244)   | 14428 (10085–20504) | 60981 (39084–101104) |
|                      | Percent (all-cause)†  | 3.2% (2.3–4.2%)  | 14.9% (10.5–19.5%) | 10.9% (8.8–12.9%)  | 11.8% (9.3–15.1%)   | 21.9% (14.9–34%)     |
| United Arab Emirates | Percent (proportion)‡ | 0.6%             | 0.5%               | 5.0%               | 18.0%               | 76.0%                |
|                      | Number                | 11 (5–21)        | 20 (11–33)         | 1396 (868–2165)    | 1291 (860–1847)     | 417 (283–651)        |
|                      | Percent (all-cause)†  | 3.8% (1.8–6.9%)  | 12.5% (7–20%)      | 9.5% (7–13.8%)     | 11.2% (8.3–15.2%)   | 17.2% (12.1–26.5%)   |
| Yemen                | Percent (proportion)‡ | 0.4%             | 0.6%               | 44.5%              | 41.2%               | 13.3%                |
|                      | Number                | 578 (289–1041)   | 349 (203–571)      | 2403 (1516–3585)   | 5431 (3900–7696)    | 9601 (6485–14287)    |
|                      | Percent (all-cause)†  | 1.3% (0.7–2.3%)  | 5% (3.1–7.4%)      | 5.8% (4.1–7.8%)    | 14.2% (11–18%)      | 21.8% (15.1–31.9%)   |
| Afghanistan          | Percent (proportion)‡ | 3.1%             | 1.9%               | 13.1%              | 29.6%               | 52.3%                |
|                      | Number                | 2096 (1082–4020) | 692 (370–1231)     | 5501 (3590–8284)   | 6556 (4321–9252)    | 9790 (5901–15080)    |
|                      | Percent (all-cause)†  | 2.6% (1.4–4.7%)  | 8% (4.4–13.8%)     | 9.1% (6.7–11.6%)   | 13% (9.8–16.7%)     | 19.2% (12.2–28.6%)   |
| Sudan                | Percent (proportion)‡ | 8.5%             | 2.8%               | 22.3%              | 26.6%               | 39.7%                |
|                      | Number                | 1021 (472–1859)  | 504 (282–834)      | 3164 (1818–4980)   | 6436 (4407–9633)    | 14729 (9709–23575)   |
|                      | Percent (all-cause)†  | 2% (1.3–3%)      | 9.2% (5.4–13.8%)   | 8.7% (6–12.1%)     | 14.7% (11.1–20.7%)  | 22.4% (15–35.6%)     |
|                      | Percent (proportion)‡ | 4.0%             | 1.9%               | 12.2%              | 24.9%               | 57.0%                |

**YLDs (Years Lived with Disability)**

|        |                       |                          |                            |                              |                              |                              |
|--------|-----------------------|--------------------------|----------------------------|------------------------------|------------------------------|------------------------------|
| Global | Number                | 1029053 (595443–1601400) | 6201989 (2533503–11573219) | 41134540 (13902263–81467833) | 20244168 (11391526–32840399) | 16054878 (11239271–21194040) |
|        | Percent (all-cause)†  | 3.8% (2.3–5.8%)          | 9.7% (4.1–17.2%)           | 10.3% (3.7–18.2%)            | 8.3% (4.9–12.7%)             | 12.4% (9.6–15.5%)            |
|        | Percent (proportion)‡ | 1.2%                     | 7.3%                       | 48.6%                        | 23.9%                        | 19.0%                        |



**Table S17** Age-specific disability and death related to neurological conditions (NCs)\* in North Africa and Middle East countries in 2019

|                              |                       | <b>Under 5</b>        | <b>5-14 years</b>       | <b>15-49 years</b>        | <b>50-69 years</b>       | <b>70+ years</b>       |
|------------------------------|-----------------------|-----------------------|-------------------------|---------------------------|--------------------------|------------------------|
|                              |                       | Mean (95% UI)         | Mean (95% UI)           | Mean (95% UI)             | Mean (95% UI)            | Mean (95% UI)          |
| North Africa and Middle East | Number                | 106090 (57815–169842) | 665672 (239345–1378182) | 3898903 (1409732–7746463) | 1242427 (708831–2023007) | 715201 (504864–948446) |
|                              | Percent (all-cause)†  | 4.5% (2.5–7%)         | 12% (4.4–21.7%)         | 11% (4.3–19.3%)           | 8.9% (5.4–13.4%)         | 13.4% (10.4–16.7%)     |
|                              | Percent (proportion)‡ | 1.6%                  | 10.0%                   | 58.8%                     | 18.7%                    | 10.8%                  |
| Algeria                      | Number                | 7265 (1888–15613)     | 41133 (13902–88878)     | 261118 (96258–519835)     | 94042 (53916–153255)     | 59458 (41887–79465)    |
|                              | Percent (all-cause)†  | 5.1% (1.3–10.4%)      | 12.8% (4.9–23.7%)       | 11.3% (4.5–19.9%)         | 9.1% (5.5–14%)           | 13.9% (10.6–17.6%)     |
|                              | Percent (proportion)‡ | 1.6%                  | 8.9%                    | 56.4%                     | 20.3%                    | 12.8%                  |
| Bahrain                      | Number                | 127 (30–279)          | 978 (279–2043)          | 10313 (3848–19932)        | 3324 (1767–5581)         | 729 (510–980)          |
|                              | Percent (all-cause)†  | 5.9% (1.5–12.5%)      | 13.5% (4.6–24.3%)       | 10.5% (4.3–18%)           | 7.2% (4–11.2%)           | 10.6% (7.9–13.4%)      |
|                              | Percent (proportion)‡ | 0.8%                  | 6.3%                    | 66.7%                     | 21.5%                    | 4.7%                   |
| Egypt                        | Number                | 21669 (5184–43591)    | 135008 (33308–290109)   | 600233 (192267–1204548)   | 206706 (119477–328266)   | 92816 (65546–124064)   |
|                              | Percent (all-cause)†  | 6% (1.5–11.6%)        | 13.2% (3.6–24.9%)       | 11.9% (4.2–21.4%)         | 9.8% (6.1–14.6%)         | 13.8% (10.6–17.4%)     |
|                              | Percent (proportion)‡ | 2.1%                  | 12.8%                   | 56.8%                     | 19.6%                    | 8.8%                   |
| Iran                         | Number                | 12856 (6879–21401)    | 73311 (29686–142977)    | 579623 (205491–1155228)   | 199448 (109038–330752)   | 126856 (87935–171157)  |
|                              | Percent (all-cause)†  | 6.1% (3.3–9.4%)       | 12.3% (5.2–21.4%)       | 10.7% (4.2–18.8%)         | 8.4% (4.9–13.1%)         | 13% (9.9–16.4%)        |
|                              | Percent (proportion)‡ | 1.3%                  | 7.4%                    | 58.4%                     | 20.1%                    | 12.8%                  |
| Iraq                         | Number                | 8014 (2053–16804)     | 51456 (16548–110037)    | 266632 (96207–539023)     | 72201 (41850–116308)     | 38582 (27075–50973)    |
|                              | Percent (all-cause)†  | 4.7% (1.2–9.7%)       | 11.8% (3.9–21.9%)       | 10.7% (4.1–19%)           | 9.4% (5.7–13.9%)         | 14.5% (11.1–18.3%)     |
|                              | Percent (proportion)‡ | 1.8%                  | 11.8%                   | 61.0%                     | 16.5%                    | 8.8%                   |
| Jordan                       | Number                | 2058 (536–4541)       | 14477 (4457–30533)      | 72227 (25351–145210)      | 20208 (11364–33176)      | 10708 (7484–14342)     |
|                              | Percent (all-cause)†  | 5.5% (1.5–11.8%)      | 13.2% (4.4–24.5%)       | 11.6% (4.4–20.7%)         | 9.5% (5.7–14.6%)         | 14.9% (11.3–18.8%)     |
|                              | Percent (proportion)‡ | 1.7%                  | 12.1%                   | 60.4%                     | 16.9%                    | 8.9%                   |
| Kuwait                       | Number                | 543 (137–1247)        | 3230 (977–6657)         | 33439 (11825–65894)       | 7223 (3918–12122)        | 3356 (2372–4457)       |
|                              | Percent (all-cause)†  | 6.4% (1.6–13.6%)      | 13.2% (4.4–23.5%)       | 10.6% (4–18.7%)           | 7.9% (4.4–12.4%)         | 13.3% (10.2–16.6%)     |
|                              | Percent (proportion)‡ | 1.1%                  | 6.8%                    | 70.0%                     | 15.1%                    | 7.0%                   |
| Lebanon                      | Number                | 830 (216–1820)        | 4842 (1412–10209)       | 31315 (10415–62192)       | 12167 (6757–20139)       | 11956 (8389–15740)     |
|                              | Percent (all-cause)†  | 5.4% (1.4–11.7%)      | 12.9% (4.2–24.1%)       | 10.7% (3.9–18.9%)         | 8.2% (4.9–12.6%)         | 13% (10–16.3%)         |
|                              | Percent (proportion)‡ | 1.4%                  | 7.9%                    | 51.2%                     | 19.9%                    | 19.6%                  |
| Libya                        | Number                | 594 (180–1204)        | 5862 (1704–12633)       | 47674 (16764–94232)       | 14198 (8033–23364)       | 8718 (6134–11555)      |
|                              | Percent (all-cause)†  | 4.1% (1.3–8.4%)       | 11.7% (3.8–22.1%)       | 10.3% (4–18.4%)           | 8.5% (5.1–13.1%)         | 13.2% (10.2–16.5%)     |
|                              | Percent (proportion)‡ | 0.8%                  | 7.6%                    | 61.9%                     | 18.4%                    | 11.3%                  |
| Morocco                      | Number                | 5641 (1229–12615)     | 36912 (10360–76918)     | 225060 (76899–451211)     | 97029 (54253–156140)     | 51589 (36320–68664)    |
|                              | Percent (all-cause)†  | 5.1% (1.3–11.2%)      | 12.4% (3.9–23.3%)       | 10.9% (4.2–19.3%)         | 9.2% (5.6–13.8%)         | 13.9% (10.6–17.4%)     |
|                              | Percent (proportion)‡ | 1.4%                  | 8.9%                    | 54.1%                     | 23.3%                    | 12.4%                  |
| Palestine                    | Number                | 963 (259–2036)        | 6804 (2090–14276)       | 28680 (9833–57506)        | 6923 (3833–11463)        | 3554 (2499–4729)       |
|                              | Percent (all-cause)†  | 5.1% (1.5–10.4%)      | 11.9% (3.8–22.5%)       | 10.2% (3.9–18%)           | 7.9% (4.7–12.2%)         | 13.2% (10.1–16.8%)     |
|                              | Percent (proportion)‡ | 2.1%                  | 14.5%                   | 61.1%                     | 14.8%                    | 7.6%                   |
| Oman                         | Number                | 694 (178–1540)        | 3410 (1013–7265)        | 32773 (11278–64661)       | 5146 (2836–8568)         | 1909 (1350–2557)       |
|                              | Percent (all-cause)†  | 4.8% (1.2–10%)        | 11.9% (3.8–22.1%)       | 11% (4.2–19.3%)           | 8.3% (4.7–12.9%)         | 12.7% (9.6–16.2%)      |
|                              | Percent (proportion)‡ | 1.6%                  | 7.8%                    | 74.6%                     | 11.7%                    | 4.3%                   |
| Qatar                        | Number                | 261 (69–575)          | 1493 (459–3082)         | 22247 (8736–43034)        | 3410 (1866–5679)         | 408 (285–556)          |
|                              | Percent (all-cause)†  | 6.7% (1.9–14.1%)      | 13.7% (4.8–25.2%)       | 10.7% (4.3–18.4%)         | 6.9% (3.9–10.7%)         | 9.4% (7–12.1%)         |
|                              | Percent (proportion)‡ | 0.9%                  | 5.4%                    | 80.0%                     | 12.3%                    | 1.5%                   |
| Saudi Arabia                 | Number                | 4457 (1144–9703)      | 29560 (9168–61625)      | 294212 (113282–564071)    | 62487 (35622–98927)      | 18825 (13336–24790)    |
|                              | Percent (all-cause)†  | 6.8% (1.8–14.2%)      | 14.8% (5.4–26.5%)       | 11.3% (4.7–19.3%)         | 9.1% (5.4–13.5%)         | 13.2% (9.9–16.6%)      |
|                              | Percent (proportion)‡ | 1.1%                  | 7.2%                    | 71.8%                     | 15.3%                    | 4.6%                   |
| Syrian Arab Republic         | Number                | 1988 (483–4190)       | 17318 (5045–37181)      | 86397 (29329–176057)      | 37150 (20724–61839)      | 17752 (12478–23773)    |
|                              | Percent (all-cause)†  | 4.6% (1.2–9.2%)       | 10.2% (3.4–19.7%)       | 10.4% (3.9–18.7%)         | 8.6% (5.1–13.2%)         | 12.2% (9.2–15.5%)      |
|                              | Percent (proportion)‡ | 1.2%                  | 10.8%                   | 53.8%                     | 23.1%                    | 11.1%                  |
| Tunisia                      | Number                | 1243 (317–2747)       | 9476 (2757–20236)       | 69142 (22909–138399)      | 32409 (17990–53019)      | 23197 (16253–30922)    |

**Table S17** Age-specific disability and death related to neurological conditions (NCs)\* in North Africa and Middle East countries in 2019

|                                  |                       | Under 5                      | 5-14 years                | 15-49 years                  | 50-69 years                  | 70+ years                     |
|----------------------------------|-----------------------|------------------------------|---------------------------|------------------------------|------------------------------|-------------------------------|
|                                  |                       | Mean (95% UI)                | Mean (95% UI)             | Mean (95% UI)                | Mean (95% UI)                | Mean (95% UI)                 |
| Türkiye                          | Percent (all-cause)†  | 4.8% (1.3–10.2%)             | 12.9% (4.2–24.4%)         | 10.9% (4.1–19.6%)            | 8.4% (5–12.9%)               | 13% (10.1–16.3%)              |
|                                  | Percent (proportion)‡ | 0.9%                         | 7.0%                      | 51.0%                        | 23.9%                        | 17.1%                         |
|                                  | Number                | 10509 (2597–22288)           | 66600 (20994–133604)      | 531490 (197580–1036232)      | 222358 (123358–366493)       | 177301 (124301–235688)        |
| United Arab Emirates             | Percent (all-cause)†  | 6.6% (1.8–13.3%)             | 13.5% (4.8–23.9%)         | 11.1% (4.5–19.5%)            | 8.6% (5.1–13.2%)             | 13.5% (10.4–16.8%)            |
|                                  | Percent (proportion)‡ | 1.0%                         | 6.6%                      | 52.7%                        | 22.1%                        | 17.6%                         |
|                                  | Number                | 723 (192–1518)               | 5225 (1740–10565)         | 79441 (33111–148484)         | 17122 (9956–27173)           | 1598 (1117–2144)              |
| Yemen                            | Percent (all-cause)†  | 6.7% (1.9–13.3%)             | 14.1% (5.1–25.5%)         | 10.6% (4.9–17.7%)            | 9.6% (6–14.2%)               | 14% (10.7–17.8%)              |
|                                  | Percent (proportion)‡ | 0.7%                         | 5.0%                      | 76.3%                        | 16.4%                        | 1.5%                          |
|                                  | Number                | 6183 (1509–13323)            | 44942 (12272–96213)       | 174619 (57103–355404)        | 37188 (20813–60664)          | 18927 (13187–25352)           |
| Afghanistan                      | Percent (all-cause)†  | 1.8% (0.5–3.7%)              | 9.4% (2.9–17.9%)          | 9.9% (3.5–18%)               | 9% (5.3–13.7%)               | 12.7% (9.6–16.1%)             |
|                                  | Percent (proportion)‡ | 2.2%                         | 15.9%                     | 62.0%                        | 13.2%                        | 6.7%                          |
|                                  | Number                | 10669 (2315–23865)           | 57248 (16318–122848)      | 209754 (73291–418173)        | 36238 (20305–58861)          | 15853 (11225–21268)           |
| Sudan                            | Percent (all-cause)†  | 3.6% (0.8–7.4%)              | 9.5% (3.1–18.1%)          | 9.5% (3.7–17.1%)             | 7.4% (4.2–11.7%)             | 10.3% (7.8–13.3%)             |
|                                  | Percent (proportion)‡ | 3.2%                         | 17.4%                     | 63.6%                        | 11.0%                        | 4.8%                          |
|                                  | Number                | 8698 (2159–19252)            | 55713 (16868–118448)      | 238554 (81724–484970)        | 54189 (30557–87648)          | 30382 (21473–40356)           |
| Sudan                            | Percent (all-cause)†  | 3.1% (0.8–6.7%)              | 10.8% (3.8–20.4%)         | 11.3% (4.3–20.3%)            | 9.6% (5.9–14.6%)             | 13.5% (10.3–17%)              |
|                                  | Percent (proportion)‡ | 2.2%                         | 14.4%                     | 61.6%                        | 14.0%                        | 7.8%                          |
|                                  | Number                | 8698 (2159–19252)            | 55713 (16868–118448)      | 238554 (81724–484970)        | 54189 (30557–87648)          | 30382 (21473–40356)           |
| <b>YLLs (Years of Life Lost)</b> |                       |                              |                           |                              |                              |                               |
| Global                           | Number                | 15576579 (12089825–20399870) | 4980417 (4056697–6169097) | 29713616 (26564786–33285822) | 62051920 (55032968–72228588) | 76076291 (59694633–104427592) |
|                                  | Percent (all-cause)†  | 3.5% (2.9–4.3%)              | 9.3% (7.7–11.3%)          | 7.6% (7–8.3%)                | 14.3% (13.1–16.3%)           | 21.4% (17–29.4%)              |
|                                  | Percent (proportion)‡ | 8.3%                         | 2.6%                      | 15.8%                        | 32.9%                        | 40.4%                         |
| North Africa and Middle East     | Number                | 691552 (459261–1010884)      | 394922 (291311–520942)    | 2329323 (1883336–2840794)    | 3180940 (2627179–3966664)    | 3344518 (2576639–4737669)     |
|                                  | Percent (all-cause)†  | 2.6% (1.8–3.7%)              | 10.1% (7.6–13.1%)         | 8.6% (7.5–9.6%)              | 12% (10.6–14.1%)             | 19.4% (15.1–27.5%)            |
|                                  | Percent (proportion)‡ | 7.0%                         | 4.0%                      | 23.4%                        | 32.0%                        | 33.6%                         |
| Algeria                          | Number                | 19836 (11715–31291)          | 14522 (9166–21391)        | 117784 (86429–156976)        | 191034 (138117–267539)       | 281255 (198413–422905)        |
|                                  | Percent (all-cause)†  | 1.3% (0.8–2%)                | 7.3% (4.7–10.6%)          | 7.9% (6.3–9.9%)              | 13.5% (10.6–17.7%)           | 21.9% (16.2–32.2%)            |
|                                  | Percent (proportion)‡ | 3.2%                         | 2.3%                      | 18.9%                        | 30.6%                        | 45.0%                         |
| Bahrain                          | Number                | 214 (146–303)                | 229 (164–312)             | 3198 (2391–4142)             | 3705 (2572–5721)             | 2648 (1807–4294)              |
|                                  | Percent (all-cause)†  | 2.8% (2.1–3.6%)              | 8.7% (6.3–11.7%)          | 7.4% (6.1–8.7%)              | 7.4% (5.7–10.8%)             | 12% (8.7–19.9%)               |
|                                  | Percent (proportion)‡ | 2.1%                         | 2.3%                      | 32.0%                        | 37.1%                        | 26.5%                         |
| Egypt                            | Number                | 177417 (80198–321189)        | 111535 (62958–186427)     | 442640 (313927–609409)       | 584066 (385169–893501)       | 388502 (247886–631086)        |
|                                  | Percent (all-cause)†  | 6.2% (3–11.2%)               | 16.9% (9.9–27.4%)         | 10.8% (8.6–13.5%)            | 9% (6.7–12.8%)               | 12.6% (8.5–19.9%)             |
|                                  | Percent (proportion)‡ | 10.4%                        | 6.5%                      | 26.0%                        | 34.3%                        | 22.8%                         |
| Iran                             | Number                | 25379 (14728–36503)          | 31586 (22581–38719)       | 224846 (187256–256848)       | 358902 (294890–438508)       | 527660 (380949–778819)        |
|                                  | Percent (all-cause)†  | 1.9% (1.1–2.6%)              | 9.1% (6.6–11.1%)          | 7.2% (6.1–8.2%)              | 12.2% (10.1–14.8%)           | 20.6% (14.9–30.4%)            |
|                                  | Percent (proportion)‡ | 2.2%                         | 2.7%                      | 19.2%                        | 30.7%                        | 45.2%                         |
| Iraq                             | Number                | 42556 (24850–69198)          | 37035 (26207–50121)       | 214513 (152826–298870)       | 290535 (211315–384402)       | 239628 (182360–321001)        |
|                                  | Percent (all-cause)†  | 3.2% (2.1–4.7%)              | 12.6% (9.2–16.6%)         | 10.5% (9–12.6%)              | 17.8% (15.8–20.5%)           | 26.4% (21.5–34.7%)            |
|                                  | Percent (proportion)‡ | 5.2%                         | 4.5%                      | 26.0%                        | 35.2%                        | 29.1%                         |
| Jordan                           | Number                | 4917 (3224–7435)             | 4244 (3151–5612)          | 18162 (14057–22616)          | 33583 (25116–45026)          | 40659 (28753–59253)           |
|                                  | Percent (all-cause)†  | 1.5% (1.2–2%)                | 7.6% (5.8–9.8%)           | 7% (5.8–8.2%)                | 12.3% (9.7–15.4%)            | 21.8% (15.9–31%)              |
|                                  | Percent (proportion)‡ | 4.8%                         | 4.2%                      | 17.9%                        | 33.1%                        | 40.0%                         |
| Kuwait                           | Number                | 987 (693–1356)               | 894 (679–1153)            | 8759 (6873–11008)            | 8680 (6317–12396)            | 11253 (7197–18310)            |
|                                  | Percent (all-cause)†  | 2% (1.5–2.6%)                | 9.9% (7.8–12.4%)          | 8.4% (7–9.9%)                | 10.4% (8.1–13.9%)            | 21.3% (13.9–34.4%)            |
|                                  | Percent (proportion)‡ | 3.2%                         | 2.9%                      | 28.6%                        | 28.4%                        | 36.8%                         |
| Lebanon                          | Number                | 1430 (627–2801)              | 1375 (810–2254)           | 9170 (5904–13492)            | 12328 (7577–20072)           | 32858 (17841–60302)           |
|                                  | Percent (all-cause)†  | 1.7% (0.8–3%)                | 10.5% (6.2–16.7%)         | 5.4% (3.8–7.6%)              | 5.3% (3.6–8.5%)              | 12.2% (6.6–21.9%)             |

**Table S17** Age-specific disability and death related to neurological conditions (NCs)\* in North Africa and Middle East countries in 2019

|                      |                       | <b>Under 5</b>        | <b>5-14 years</b>   | <b>15-49 years</b>     | <b>50-69 years</b>     | <b>70+ years</b>        |
|----------------------|-----------------------|-----------------------|---------------------|------------------------|------------------------|-------------------------|
|                      |                       | Mean (95% UI)         | Mean (95% UI)       | Mean (95% UI)          | Mean (95% UI)          | Mean (95% UI)           |
| Libya                | Percent (proportion)‡ | 2.5%                  | 2.4%                | 16.0%                  | 21.6%                  | 57.5%                   |
|                      | Number                | 3551 (1838–5843)      | 2418 (1541–3547)    | 29431 (20734–40888)    | 30488 (21166–43578)    | 35888 (22556–59908)     |
|                      | Percent (all-cause)†  | 3.7% (2.5–5.5%)       | 8.2% (5.3–11.9%)    | 7.6% (5.8–9.8%)        | 11.4% (8.9–15.5%)      | 20.9% (13.8–34.2%)      |
| Morocco              | Percent (proportion)‡ | 3.5%                  | 2.4%                | 28.9%                  | 30.0%                  | 35.3%                   |
|                      | Number                | 24843 (9611–60775)    | 11585 (6084–19711)  | 111284 (70802–180725)  | 294337 (206215–399206) | 301768 (221294–437190)  |
|                      | Percent (all-cause)†  | 2.5% (1.1–5.8%)       | 7.7% (4.1–12.8%)    | 7.9% (5.7–10.7%)       | 12.9% (10.6–16.3%)     | 21.1% (16.1–30.4%)      |
| Palestine            | Percent (proportion)‡ | 3.3%                  | 1.6%                | 15.0%                  | 39.6%                  | 40.6%                   |
|                      | Number                | 3187 (2065–4860)      | 3014 (2212–4350)    | 11316 (8982–13894)     | 19816 (15811–25133)    | 22760 (17647–31383)     |
|                      | Percent (all-cause)†  | 2.3% (1.7–3.2%)       | 12.3% (9.3–17.5%)   | 9.2% (7.7–10.9%)       | 13.5% (11.6–16%)       | 22.9% (18.5–30.5%)      |
| Oman                 | Percent (proportion)‡ | 5.3%                  | 5.0%                | 18.8%                  | 33.0%                  | 37.9%                   |
|                      | Number                | 2891 (1661–4875)      | 1585 (991–2411)     | 11646 (8601–17664)     | 11046 (8349–15117)     | 10720 (8091–15019)      |
|                      | Percent (all-cause)†  | 4% (2.4–6.6%)         | 10.3% (6.5–15.5%)   | 6.1% (4.6–9.2%)        | 10.7% (8.4–14.8%)      | 17.1% (13.2–23.9%)      |
| Qatar                | Percent (proportion)‡ | 7.6%                  | 4.2%                | 30.7%                  | 29.2%                  | 28.3%                   |
|                      | Number                | 396 (249–597)         | 390 (276–535)       | 5241 (3717–7479)       | 3129 (1968–5211)       | 1362 (882–2265)         |
|                      | Percent (all-cause)†  | 2.1% (1.4–3%)         | 8.3% (6–11.1%)      | 5.7% (4.6–7.4%)        | 7% (5–10.8%)           | 9.5% (6.6–15.8%)        |
| Saudi Arabia         | Percent (proportion)‡ | 3.8%                  | 3.7%                | 49.8%                  | 29.7%                  | 12.9%                   |
|                      | Number                | 3593 (1779–7542)      | 4323 (2728–7058)    | 194724 (138313–274083) | 174611 (123725–229068) | 86415 (60676–123987)    |
|                      | Percent (all-cause)†  | 1.6% (0.8–3.2%)       | 7.3% (4.8–11.6%)    | 7.5% (6.1–9.1%)        | 12.8% (9.5–15.6%)      | 21.3% (14.9–30%)        |
| Syrian Arab Republic | Percent (proportion)‡ | 0.8%                  | 0.9%                | 42.0%                  | 37.7%                  | 18.6%                   |
|                      | Number                | 9551 (5853–14802)     | 13828 (10382–18637) | 57957 (42147–79724)    | 106417 (73218–155056)  | 93114 (64679–141563)    |
|                      | Percent (all-cause)†  | 3.4% (2.3–4.8%)       | 13.3% (10.3–17.4%)  | 11% (9.3–12.4%)        | 12.2% (10.4–14.9%)     | 17.4% (13.6–24.8%)      |
| Tunisia              | Percent (proportion)‡ | 3.4%                  | 4.9%                | 20.6%                  | 37.9%                  | 33.2%                   |
|                      | Number                | 3031 (1698–4745)      | 2484 (1543–3780)    | 25755 (17249–36077)    | 66792 (44849–99866)    | 108962 (70651–172346)   |
|                      | Percent (all-cause)†  | 1.8% (1.1–2.7%)       | 7.1% (4.6–10.5%)    | 7.4% (5.9–9.3%)        | 12.6% (9.9–16.4%)      | 21.9% (15.5–32.8%)      |
| Türkiye              | Percent (proportion)‡ | 1.5%                  | 1.2%                | 12.4%                  | 32.3%                  | 52.6%                   |
|                      | Number                | 42348 (28569–59174)   | 29207 (19866–38851) | 201851 (144281–263691) | 406269 (283602–573676) | 701204 (461666–1141534) |
|                      | Percent (all-cause)†  | 3.2% (2.3–4.1%)       | 15% (10.5–19.6%)    | 10.7% (8.7–12.7%)      | 11.7% (9.2–14.8%)      | 20.4% (14.5–31%)        |
| United Arab Emirates | Percent (proportion)‡ | 3.1%                  | 2.1%                | 14.6%                  | 29.4%                  | 50.8%                   |
|                      | Number                | 972 (439–1871)        | 1596 (881–2593)     | 67505 (42117–104630)   | 39995 (26413–57486)    | 5982 (4020–9158)        |
|                      | Percent (all-cause)†  | 3.7% (1.8–6.8%)       | 12.5% (7–20.1%)     | 9.3% (6.9–13.7%)       | 11.1% (8.2–15%)        | 16.3% (11.5–24.8%)      |
| Yemen                | Percent (proportion)‡ | 0.8%                  | 1.4%                | 58.2%                  | 34.5%                  | 5.2%                    |
|                      | Number                | 50618 (25284–91055)   | 27685 (16100–45292) | 122560 (76773–182002)  | 155566 (111695–220052) | 128871 (88852–189769)   |
|                      | Percent (all-cause)†  | 1.3% (0.7–2.3%)       | 5% (3.1–7.4%)       | 5.3% (3.7–7.2%)        | 13.9% (10.9–17.7%)     | 20.9% (14.8–29.9%)      |
| Afghanistan          | Percent (proportion)‡ | 10.4%                 | 5.7%                | 25.3%                  | 32.1%                  | 26.6%                   |
|                      | Number                | 184077 (95108–352918) | 55040 (29403–98127) | 282295 (184158–427672) | 200566 (132241–284657) | 132885 (81899–200170)   |
|                      | Percent (all-cause)†  | 2.6% (1.4–4.7%)       | 8% (4.4–13.8%)      | 8.7% (6.4–11.1%)       | 12.9% (9.7–16.5%)      | 18.4% (12–27%)          |
| Sudan                | Percent (proportion)‡ | 21.5%                 | 6.4%                | 33.0%                  | 23.5%                  | 15.5%                   |
|                      | Number                | 89056 (41178–162374)  | 39947 (22418–65982) | 166321 (95277–262096)  | 185843 (126165–277261) | 186724 (126167–291084)  |
|                      | Percent (all-cause)†  | 2% (1–3.3%)           | 9.2% (5.4–13.8%)    | 8.4% (5.8–11.8%)       | 14.4% (10.8–20.4%)     | 21.4% (14.7–33%)        |
|                      | Percent (proportion)‡ | 13.3%                 | 6.0%                | 24.9%                  | 27.8%                  | 28.0%                   |

DALYs, Disability-Adjusted Life Years; NC, neurological condition; UI, uncertainty interval; YLDs, Years Lived with Disability; YLLs, Years of Life Lost. Count data are absolute numbers and percentage data are rounded to one decimal place. Percentages and number of DALYs, deaths, YLDs, and YLLs are not mutually exclusive: the sum of percentages and number of DALYs, deaths, YLDs, and YLLs in the columns exceeds the totals for all causes combined because of overlap between various causes. Measures with insufficient data are not reported here. \*Neurological conditions in this table include stroke, encephalitis, meningitis, tetanus, brain and central nervous system cancer, Alzheimer's disease and other dementias, Parkinson's disease, idiopathic epilepsy, multiple sclerosis, headache disorders (including migraine and tension-type headache), motor neuron disease, and other neurological disorders. †Percent of all-cause indicates the proportion of the specified measure (ie, DALYs, deaths, YDLs, or YLLs) of NCs out of all causes in the age-group in the region/nation. ‡Percent proportion indicates the share of the specified measure (ie, DALYs, deaths, YDLs, or YLLs) of NCs in different age-groups in the region/nation. Data in parentheses are 95% uncertainty intervals.

***Table S18 Age-specific disability and death related to stroke in North Africa and Middle East countries in 2019***  
(NEXT PAGE)

**Table S18** Age-specific disability and death related to stroke in North Africa and Middle East countries in 2019

|                                               |                       | Under 5                 | 5-14 years             | 15-49 years                  | 50-69 years                  | 70+ years                    |
|-----------------------------------------------|-----------------------|-------------------------|------------------------|------------------------------|------------------------------|------------------------------|
|                                               |                       | Mean (95% UI)           | Mean (95% UI)          | Mean (95% UI)                | Mean (95% UI)                | Mean (95% UI)                |
| <b>DALYs (Disability-Adjusted Life Years)</b> |                       |                         |                        |                              |                              |                              |
| Global                                        | Number                | 883016 (692630–1156560) | 795524 (665731–943026) | 21456824 (19629438–23350770) | 58900257 (54657029–63240721) | 61196563 (55988184–65395158) |
|                                               | Percent (all-cause)*  | 0.2% (0.2–0.2%)         | 0.7% (0.6–0.8%)        | 2.7% (2.4–3.1%)              | 8.7% (7.9–9.5%)              | 12.6% (11.5–13.5%)           |
|                                               | Percent (proportion)† | 0.6%                    | 0.6%                   | 15.0%                        | 41.1%                        | 42.7%                        |
| North Africa and Middle East                  | Number                | 173970 (109281–274824)  | 139345 (105063–179017) | 1886930 (1603813–2221147)    | 3052765 (2684215–3443302)    | 2692994 (2430297–2944737)    |
|                                               | Percent (all-cause)*  | 0.6% (0.4–1%)           | 1.5% (1.1–2%)          | 3% (2.6–3.6%)                | 7.5% (6.8–8.3%)              | 11.9% (10.9–13%)             |
|                                               | Percent (proportion)† | 2.2%                    | 1.8%                   | 23.7%                        | 38.4%                        | 33.9%                        |
| Algeria                                       | Number                | 3933 (2466–6060)        | 4466 (3232–6015)       | 103255 (81223–129971)        | 194700 (155120–239431)       | 237591 (195543–283638)       |
|                                               | Percent (all-cause)*  | 0.2% (0.1–0.3%)         | 0.9% (0.6–1.2%)        | 2.8% (2.2–3.5%)              | 7.9% (6.6–9.5%)              | 13.9% (12–15.8%)             |
|                                               | Percent (proportion)† | 0.7%                    | 0.8%                   | 19.0%                        | 35.8%                        | 43.7%                        |
| Bahrain                                       | Number                | 38 (25–54)              | 57 (42–74)             | 2627 (2147–3165)             | 3343 (2709–4298)             | 1923 (1603–2402)             |
|                                               | Percent (all-cause)*  | 0.4% (0.3–0.5%)         | 0.6% (0.4–0.8%)        | 1.9% (1.5–2.2%)              | 3.5% (3.4–2%)                | 6.6% (5.9–8.1%)              |
|                                               | Percent (proportion)† | 0.5%                    | 0.7%                   | 32.9%                        | 41.8%                        | 24.1%                        |
| Egypt                                         | Number                | 107800 (50352–193128)   | 69128 (42975–97747)    | 396743 (299439–523614)       | 587440 (425240–826541)       | 332858 (246949–451178)       |
|                                               | Percent (all-cause)*  | 3.3% (1.7–6%)           | 4.2% (2.6–6.1%)        | 4.4% (3.4–5.6%)              | 6.8% (5.4–8.9%)              | 8.8% (7–11.4%)               |
|                                               | Percent (proportion)† | 7.2%                    | 4.6%                   | 26.6%                        | 39.3%                        | 22.3%                        |
| Iran                                          | Number                | 3209 (1849–4612)        | 7233 (5852–8752)       | 159382 (144749–177369)       | 320978 (295631–345196)       | 393966 (351961–423741)       |
|                                               | Percent (all-cause)*  | 0.2% (0.1–0.3%)         | 0.8% (0.6–1%)          | 1.9% (1.6–2.2%)              | 6.1% (5.4–6.7%)              | 11.1% (9.9–12.1%)            |
|                                               | Percent (proportion)† | 0.4%                    | 0.8%                   | 18.0%                        | 36.3%                        | 44.5%                        |
| Iraq                                          | Number                | 5890 (3380–9686)        | 8571 (6631–10691)      | 173231 (131014–230788)       | 282662 (216985–351869)       | 212588 (179402–241445)       |
|                                               | Percent (all-cause)*  | 0.4% (0.3–0.6%)         | 1.2% (0.9–1.5%)        | 3.9% (3.1–4.8%)              | 11.8% (10.5–13.2%)           | 18.1% (16.3–19.9%)           |
|                                               | Percent (proportion)† | 0.9%                    | 1.3%                   | 25.4%                        | 41.4%                        | 31.1%                        |
| Jordan                                        | Number                | 384 (253–606)           | 963 (703–1283)         | 15272 (12580–18270)          | 34058 (28435–40799)          | 35441 (29479–41141)          |
|                                               | Percent (all-cause)*  | 0.1% (0.1–0.2%)         | 0.6% (0.4–0.8%)        | 1.8% (1.5–2.1%)              | 7% (6–7.9%)                  | 13.7% (11.7–15.4%)           |
|                                               | Percent (proportion)† | 0.4%                    | 1.1%                   | 17.7%                        | 39.5%                        | 41.2%                        |
| Kuwait                                        | Number                | 154 (113–206)           | 281 (215–361)          | 8684 (7268–10329)            | 8474 (7007–10246)            | 7870 (6568–9241)             |
|                                               | Percent (all-cause)*  | 0.3% (0.2–0.3%)         | 0.9% (0.7–1.1%)        | 2.1% (1.7–2.6%)              | 4.8% (4.1–5.6%)              | 10.1% (8.6–11.4%)            |
|                                               | Percent (proportion)† | 0.6%                    | 1.1%                   | 34.1%                        | 33.3%                        | 30.9%                        |
| Lebanon                                       | Number                | 98 (53–184)             | 263 (181–361)          | 6045 (4439–8049)             | 11188 (8642–14372)           | 21621 (16607–26956)          |
|                                               | Percent (all-cause)*  | 0.1% (0.1–0.2%)         | 0.5% (0.4–0.7%)        | 1.3% (1.1–1.7%)              | 3% (2.3–3.7%)                | 6% (4.5–7.3%)                |
|                                               | Percent (proportion)† | 0.3%                    | 0.7%                   | 15.4%                        | 28.5%                        | 55.1%                        |
| Libya                                         | Number                | 1991 (956–3299)         | 1060 (710–1501)        | 23971 (17769–31823)          | 28852 (21884–37306)          | 26445 (20632–34061)          |
|                                               | Percent (all-cause)*  | 1.8% (0.9–2.7%)         | 1.4% (0.9–2%)          | 2.8% (2.2–3.7%)              | 6.7% (5.4–8.1%)              | 11.1% (9.1–14.1%)            |
|                                               | Percent (proportion)† | 2.4%                    | 1.3%                   | 29.1%                        | 35.0%                        | 32.1%                        |
| Morocco                                       | Number                | 3196 (1405–5850)        | 4271 (2886–5753)       | 102734 (75651–145087)        | 297421 (226011–370896)       | 258663 (213632–311033)       |
|                                               | Percent (all-cause)*  | 0.3% (0.1–0.5%)         | 1% (0.6–1.4%)          | 3% (2.3–3.8%)                | 8.9% (7.6–10.5%)             | 14.4% (12.3–17.1%)           |
|                                               | Percent (proportion)† | 0.5%                    | 0.6%                   | 15.4%                        | 44.6%                        | 38.8%                        |
| Palestine                                     | Number                | 364 (243–565)           | 480 (357–644)          | 6577 (5529–7798)             | 18054 (15485–20979)          | 19428 (16967–21977)          |
|                                               | Percent (all-cause)*  | 0.2% (0.2–0.3%)         | 0.6% (0.5–0.8%)        | 1.7% (1.4–2%)                | 7.7% (6.8–8.6%)              | 15.4% (13.8–16.8%)           |
|                                               | Percent (proportion)† | 0.8%                    | 1.1%                   | 14.6%                        | 40.2%                        | 43.3%                        |
| Oman                                          | Number                | 1028 (649–1488)         | 635 (477–811)          | 9716 (7938–13156)            | 10494 (8694–12802)           | 8986 (7701–10313)            |
|                                               | Percent (all-cause)*  | 1.2% (0.8–1.7%)         | 1.5% (1.1–1.9%)        | 2% (1.6–2.8%)                | 6.3% (5.3–7.7%)              | 11.6% (10.1–13.1%)           |
|                                               | Percent (proportion)† | 3.3%                    | 2.1%                   | 31.5%                        | 34.0%                        | 29.1%                        |
| Qatar                                         | Number                | 47 (30–72)              | 110 (80–143)           | 4988 (3963–6120)             | 2912 (2265–3755)             | 942 (755–1221)               |
|                                               | Percent (all-cause)*  | 0.2% (0.1–0.3%)         | 0.7% (0.5–0.9%)        | 1.7% (1.4–2%)                | 3.1% (2.5–3.8%)              | 5.1% (4.3–6.4%)              |
|                                               | Percent (proportion)† | 0.5%                    | 1.2%                   | 55.4%                        | 32.4%                        | 10.5%                        |
| Saudi Arabia                                  | Number                | 284 (185–464)           | 2039 (1418–2775)       | 167641 (127902–218203)       | 175205 (134088–212035)       | 72430 (58550–84049)          |
|                                               | Percent (all-cause)*  | 0.1% (0.1–0.2%)         | 0.8% (0.6–1%)          | 3.2% (2.6–3.9%)              | 8.5% (6.7–9.8%)              | 13.2% (10.8–14.9%)           |

**Table S18** Age-specific disability and death related to stroke in North Africa and Middle East countries in 2019

|                              |                       | <b>Under 5</b>      | <b>5-14 years</b>  | <b>15-49 years</b>     | <b>50-69 years</b>        | <b>70+ years</b>          |
|------------------------------|-----------------------|---------------------|--------------------|------------------------|---------------------------|---------------------------|
|                              |                       | Mean (95% UI)       | Mean (95% UI)      | Mean (95% UI)          | Mean (95% UI)             | Mean (95% UI)             |
| Syrian Arab Republic         | Percent (proportion)† | 0·1%                | 0·5%               | 40·1%                  | 42·0%                     | 17·3%                     |
|                              | Number                | 2478 (1554–3566)    | 6607 (5158–8292)   | 50232 (38771–65385)    | 102185 (76128–136893)     | 76832 (61630–94251)       |
|                              | Percent (all-cause)*  | 0·8% (0·5–1%)       | 2·5% (1·8–3·2%)    | 3·7% (3–4·6%)          | 7·8% (6·8–9%)             | 11·3% (10·1–12·8%)        |
| Tunisia                      | Percent (proportion)† | 1·0%                | 2·8%               | 21·1%                  | 42·9%                     | 32·2%                     |
|                              | Number                | 433 (263–654)       | 738 (520–987)      | 22597 (16498–29429)    | 66312 (49136–86536)       | 86811 (66605–109379)      |
|                              | Percent (all-cause)*  | 0·2% (0·1–0·3%)     | 0·7% (0·5–1%)      | 2·3% (1·8–3%)          | 7·2% (5·9–8·5%)           | 12·8% (10·8–14·7%)        |
| Türkiye                      | Percent (proportion)† | 0·2%                | 0·4%               | 12·8%                  | 37·5%                     | 49·1%                     |
|                              | Number                | 1957 (1223–3016)    | 4552 (3485–5738)   | 137353 (112468–167086) | 343723 (280163–417073)    | 505498 (414045–608923)    |
|                              | Percent (all-cause)*  | 0·1% (0·1–0·2%)     | 0·7% (0·5–0·9%)    | 2·1% (1·7–2·5%)        | 5·7% (4·9–6·4%)           | 10·6% (9·4–11·9%)         |
| United Arab Emirates         | Percent (proportion)† | 0·2%                | 0·5%               | 13·8%                  | 34·6%                     | 50·9%                     |
|                              | Number                | 197 (111–322)       | 409 (293–549)      | 51628 (36777–74312)    | 38081 (28406–49996)       | 5203 (4077–6610)          |
|                              | Percent (all-cause)*  | 0·5% (0·3–0·8%)     | 0·8% (0·6–1·1%)    | 3·5% (2·7–5%)          | 7% (5·8–8·9%)             | 10·8% (8·8–13·7%)         |
| Yemen                        | Percent (proportion)† | 0·2%                | 0·4%               | 54·1%                  | 39·9%                     | 5·4%                      |
|                              | Number                | 11257 (6187–19439)  | 7765 (5047–11254)  | 103623 (70850–144669)  | 152744 (117078–201608)    | 113097 (86885–141260)     |
|                              | Percent (all-cause)*  | 0·3% (0·2–0·5%)     | 0·8% (0·5–1·1%)    | 2·6% (1·9–3·4%)        | 10% (8·1–12·1%)           | 14·8% (11·6–18%)          |
| Afghanistan                  | Percent (proportion)† | 2·9%                | 2·0%               | 26·7%                  | 39·3%                     | 29·1%                     |
|                              | Number                | 5532 (3249–11166)   | 6787 (4383–9583)   | 200182 (146085–276404) | 185464 (129064–245925)    | 109872 (75310–143136)     |
|                              | Percent (all-cause)*  | 0·1% (0–0·1%)       | 0·5% (0·3–0·7%)    | 3·7% (2·9–4·5%)        | 9·1% (7–11%)              | 12·6% (8·9–15·6%)         |
| Sudan                        | Percent (proportion)† | 1·1%                | 1·3%               | 39·4%                  | 36·5%                     | 21·6%                     |
|                              | Number                | 23523 (10974–42502) | 12789 (7118–20912) | 138532 (88169–206979)  | 185373 (136963–257456)    | 162194 (122519–218780)    |
|                              | Percent (all-cause)*  | 0·5% (0·3–0·8%)     | 1·4% (0·7–2·2%)    | 3·4% (2·3–4·9%)        | 10% (7·8–13·3%)           | 14·8% (11·3–19·4%)        |
|                              | Percent (proportion)† | 4·5%                | 2·4%               | 26·5%                  | 35·5%                     | 31·0%                     |
| <b>Deaths</b>                |                       |                     |                    |                        |                           |                           |
| Global                       | Number                | 9598 (7458–12734)   | 6507 (5485–7685)   | 370056 (339481–401358) | 1821451 (1685907–1957375) | 4345112 (3888594–4659972) |
|                              | Percent (all-cause)*  | 0·2% (0·2–0·3%)     | 1% (0·8–1·1%)      | 5% (4·7–5·3%)          | 12·2% (11·7–12·7%)        | 15·3% (13·8–16·2%)        |
|                              | Percent (proportion)† | 0·1%                | 0·1%               | 5·6%                   | 27·8%                     | 66·3%                     |
| North Africa and Middle East | Number                | 1938 (1200–3073)    | 1445 (1016–1924)   | 30779 (25686–37374)    | 90431 (78757–103725)      | 187627 (167507–207442)    |
|                              | Percent (all-cause)*  | 0·6% (0·4–1%)       | 2·9% (2·1–3·8%)    | 6% (5·5–6·6%)          | 9·9% (9·3–10·6%)          | 14·1% (12·7–15·2%)        |
|                              | Percent (proportion)† | 0·6%                | 0·5%               | 9·9%                   | 29·0%                     | 60·1%                     |
| Algeria                      | Number                | 42 (25–66)          | 38 (23–56)         | 1656 (1222–2189)       | 5623 (4227–7194)          | 17453 (13966–21059)       |
|                              | Percent (all-cause)*  | 0·2% (0·1–0·4%)     | 1·5% (0·9–2·2%)    | 5·9% (4·7–7·4%)        | 11·5% (9·6–13·7%)         | 16·8% (14·2–19·3%)        |
|                              | Percent (proportion)† | 0·2%                | 0·2%               | 6·7%                   | 22·7%                     | 70·3%                     |
| Bahrain                      | Number                | 0 (0–1)             | <0·1 (<0·1–<0·1)   | 36 (27–45)             | 85 (66–117)               | 123 (101–159)             |
|                              | Percent (all-cause)*  | 0·4% (0·3–0·6%)     | 0·8% (0·6–1·1%)    | 4·2% (3·6–4·8%)        | 5% (4·3–6·4%)             | 7·8% (6·8–9·8%)           |
|                              | Percent (proportion)† | 0·2%                | 0·1%               | 14·5%                  | 34·8%                     | 50·4%                     |
| Egypt                        | Number                | 1216 (568–2181)     | 820 (487–1186)     | 6351 (4582–8685)       | 17329 (11612–25388)       | 20051 (14423–28200)       |
|                              | Percent (all-cause)*  | 3·7% (1·9–6·9%)     | 9·8% (6·1–13·8%)   | 8·2% (6·6–10·1%)       | 7·7% (5·9–10·5%)          | 9·2% (7–12·4%)            |
|                              | Percent (proportion)† | 2·7%                | 1·8%               | 13·9%                  | 37·9%                     | 43·8%                     |
| Iran                         | Number                | 32 (16–48)          | 59 (47–70)         | 2376 (2227–2606)       | 9228 (8537–9806)          | 29217 (25532–31667)       |
|                              | Percent (all-cause)*  | 0·2% (0·1–0·3%)     | 1·3% (1·1–1·6%)    | 4·1% (3·9–4·5%)        | 9% (8·4–9·5%)             | 13·8% (12–14·9%)          |
|                              | Percent (proportion)† | 0·1%                | 0·1%               | 5·8%                   | 22·6%                     | 71·4%                     |
| Iraq                         | Number                | 64 (36–107)         | 80 (58–105)        | 2934 (2113–4089)       | 8763 (6554–10990)         | 14416 (12111–16389)       |
|                              | Percent (all-cause)*  | 0·4% (0·3–0·6%)     | 2·2% (1·6–2·8%)    | 7·7% (6·8–9·4%)        | 15·8% (14·5–17·2%)        | 21·4% (19·2–23·3%)        |
|                              | Percent (proportion)† | 0·2%                | 0·3%               | 11·2%                  | 33·4%                     | 54·9%                     |
| Jordan                       | Number                | 3 (2–6)             | 4 (3–6)            | 182 (146–226)          | 930 (740–1134)            | 2248 (1797–2634)          |
|                              | Percent (all-cause)*  | 0·1% (0·1–0·1%)     | 0·5% (0·4–0·9%)    | 3·7% (3·2–4·3%)        | 9·9% (8·3–11·1%)          | 16·4% (13·5–18·2%)        |
|                              | Percent (proportion)† | 0·1%                | 0·1%               | 5·4%                   | 27·6%                     | 66·8%                     |
| Kuwait                       | Number                | 2 (1–2)             | 2 (1–3)            | 118 (93–147)           | 216 (171–269)             | 582 (469–694)             |
|                              | Percent (all-cause)*  | 0·3% (0·2–0·4%)     | 1·8% (1·3–2·3%)    | 5·8% (4·9–6·7%)        | 7·8% (6·7–8·9%)           | 12·9% (10·5–14·6%)        |

**Table S18** Age-specific disability and death related to stroke in North Africa and Middle East countries in 2019

|                                           |                       | <b>Under 5</b>      | <b>5-14 years</b>      | <b>15-49 years</b>        | <b>50-69 years</b>        | <b>70+ years</b>          |
|-------------------------------------------|-----------------------|---------------------|------------------------|---------------------------|---------------------------|---------------------------|
|                                           |                       | Mean (95% UI)       | Mean (95% UI)          | Mean (95% UI)             | Mean (95% UI)             | Mean (95% UI)             |
| Lebanon                                   | Percent (proportion)† | 0.2%                | 0.2%                   | 12.8%                     | 23.5%                     | 63.3%                     |
|                                           | Number                | 1 (0–2)             | 1 (0–2)                | 69 (43–103)               | 248 (162–348)             | 1445 (985–1879)           |
|                                           | Percent (all-cause)*  | 0.1% (0–0.2%)       | 0.5% (0.2–0.9%)        | 2.2% (1.4–3.1%)           | 3.1% (2.2–4.2%)           | 6.7% (4.5–8.7%)           |
| Libya                                     | Percent (proportion)† | 0.0%                | 0.0%                   | 3.9%                      | 14.0%                     | 81.9%                     |
|                                           | Number                | 23 (11–38)          | 10 (6–16)              | 388 (269–542)             | 814 (591–1079)            | 1852 (1398–2458)          |
|                                           | Percent (all-cause)*  | 2% (1.3–1%)         | 2.8% (1.6–4.2%)        | 5.2% (3.9–6.8%)           | 9% (7.2–11.3%)            | 13.5% (10.7–17.3%)        |
| Morocco                                   | Percent (proportion)† | 0.7%                | 0.3%                   | 12.6%                     | 26.4%                     | 60.0%                     |
|                                           | Number                | 34 (14–64)          | 36 (20–54)             | 1685 (1132–2551)          | 9106 (6615–11660)         | 18172 (14770–22104)       |
|                                           | Percent (all-cause)*  | 0.3% (0.1–0.5%)     | 1.9% (1.1–2.8%)        | 6.2% (4.8–7.7%)           | 11.6% (9.8–13.7%)         | 16.7% (14.1–19.7%)        |
| Palestine                                 | Percent (proportion)† | 0.1%                | 0.1%                   | 5.8%                      | 31.4%                     | 62.6%                     |
|                                           | Number                | 4 (2–6)             | 3 (2–5)                | 92 (74–114)               | 557 (465–658)             | 1364 (1175–1546)          |
|                                           | Percent (all-cause)*  | 0.2% (0.2–0.4%)     | 0.9% (0.6–1.6%)        | 4.1% (3.5–4.8%)           | 11% (9.9–12.1%)           | 18.4% (16.4–20%)          |
| Oman                                      | Percent (proportion)† | 0.2%                | 0.1%                   | 4.5%                      | 27.6%                     | 67.5%                     |
|                                           | Number                | 11 (7–17)           | 6 (4–8)                | 133 (104–200)             | 310 (252–389)             | 569 (481–658)             |
|                                           | Percent (all-cause)*  | 1.4% (0.9–2%)       | 3.2% (2.3–4.3%)        | 3.9% (3.1–5.8%)           | 8.7% (7.3–10.9%)          | 13% (11.2–14.8%)          |
| Qatar                                     | Percent (proportion)† | 1.1%                | 0.6%                   | 12.9%                     | 30.1%                     | 55.2%                     |
|                                           | Number                | 0 (0–1)             | 1 (0–1)                | 61 (45–82)                | 65 (46–92)                | 54 (42–73)                |
|                                           | Percent (all-cause)*  | 0.2% (0.1–0.3%)     | 1.1% (0.7–1.5%)        | 3.6% (3.4–3%)             | 4.3% (3.5–5.6%)           | 5.7% (4.8–7.7%)           |
| Saudi Arabia                              | Percent (proportion)† | 0.2%                | 0.3%                   | 34.0%                     | 35.8%                     | 29.7%                     |
|                                           | Number                | 1 (0–3)             | 5 (3–8)                | 2795 (1976–3876)          | 5037 (3642–6240)          | 4830 (3804–5664)          |
|                                           | Percent (all-cause)*  | 0% (0–0.1%)         | 0.7% (0.4–1%)          | 5.5% (4.5–6.5%)           | 11.3% (8.4–12.9%)         | 16.2% (12.7–18.3%)        |
| Syrian Arab Republic                      | Percent (proportion)† | 0.0%                | 0.0%                   | 22.1%                     | 39.8%                     | 38.1%                     |
|                                           | Number                | 28 (17–41)          | 76 (58–97)             | 824 (604–1133)            | 3088 (2226–4248)          | 5170 (4076–6438)          |
|                                           | Percent (all-cause)*  | 0.9% (0.6–1.2%)     | 5.7% (4.5–7%)          | 8.2% (7.1–9%)             | 10.3% (9.2–11.7%)         | 13% (11.6–14.7%)          |
| Tunisia                                   | Percent (proportion)† | 0.3%                | 0.8%                   | 9.0%                      | 33.6%                     | 56.3%                     |
|                                           | Number                | 4 (3–7)             | 6 (3–9)                | 363 (244–496)             | 1991 (1409–2719)          | 6349 (4789–8043)          |
|                                           | Percent (all-cause)*  | 0.2% (0.1–0.3%)     | 1.3% (0.8–1.9%)        | 5.4% (4.3–6.6%)           | 10.7% (8.9–12.4%)         | 15.9% (12.9–18.3%)        |
| Türkiye                                   | Percent (proportion)† | 0.1%                | 0.1%                   | 4.2%                      | 22.9%                     | 72.9%                     |
|                                           | Number                | 20 (11–32)          | 31 (21–42)             | 2011 (1543–2562)          | 9929 (7725–12580)         | 36957 (29468–45035)       |
|                                           | Percent (all-cause)*  | 0.1% (0.1–0.2%)     | 1.2% (0.9–1.7%)        | 5.5% (4.9–6.2%)           | 8.1% (7.3–9%)             | 13.3% (11.4–14.8%)        |
| United Arab Emirates                      | Percent (proportion)† | 0.0%                | 0.1%                   | 4.1%                      | 20.3%                     | 75.5%                     |
|                                           | Number                | 2 (1–3)             | 2 (1–4)                | 872 (551–1351)            | 996 (694–1369)            | 296 (226–390)             |
|                                           | Percent (all-cause)*  | 0.7% (0.4–1.1%)     | 1.5% (0.9–2.3%)        | 5.9% (4.5–8.9%)           | 8.6% (6.8–11.2%)          | 12.2% (9.8–15.8%)         |
| Yemen                                     | Percent (proportion)† | 0.1%                | 0.1%                   | 40.2%                     | 46.0%                     | 13.6%                     |
|                                           | Number                | 125 (67–219)        | 76 (43–120)            | 1798 (1165–2640)          | 4801 (3557–6510)          | 7575 (5690–9588)          |
|                                           | Percent (all-cause)*  | 0.3% (0.2–0.5%)     | 1.1% (0.7–1.6%)        | 4.4% (3.2–5.7%)           | 12.6% (10.1–15.1%)        | 17.2% (13.3–20.9%)        |
| Afghanistan                               | Percent (proportion)† | 0.9%                | 0.5%                   | 12.5%                     | 33.4%                     | 52.7%                     |
|                                           | Number                | 58 (33–123)         | 56 (26–91)             | 3708 (2608–5249)          | 5608 (3765–7572)          | 7386 (4887–9700)          |
|                                           | Percent (all-cause)*  | 0.1% (0–0.1%)       | 0.6% (0.3–1%)          | 6.1% (5.7–2%)             | 11.2% (8.6–13.5%)         | 14.5% (10.2–18%)          |
| Sudan                                     | Percent (proportion)† | 0.3%                | 0.3%                   | 22.1%                     | 33.3%                     | 43.9%                     |
|                                           | Number                | 265 (123–481)       | 133 (63–235)           | 2297 (1327–3602)          | 5614 (3951–8121)          | 11329 (8328–15686)        |
|                                           | Percent (all-cause)*  | 0.5% (0.3–0.9%)     | 2.4% (1.2–4%)          | 6.3% (4.4–8.9%)           | 12.8% (10–17.5%)          | 17.2% (12.9–22.9%)        |
|                                           | Percent (proportion)† | 1.4%                | 0.7%                   | 11.7%                     | 28.6%                     | 57.7%                     |
| <b>YLDs (Years Lived with Disability)</b> |                       |                     |                        |                           |                           |                           |
| Global                                    | Number                | 42149 (27680–60875) | 283563 (189735–399734) | 3553705 (2515004–4652331) | 7316451 (5253574–9472049) | 6545873 (4663662–8438002) |
|                                           | Percent (all-cause)*  | 0.2% (0.1–0.2%)     | 0.4% (0.3–0.6%)        | 0.9% (0.7–1.1%)           | 3% (2.3–3.7%)             | 5.1% (3.9–6.3%)           |
|                                           | Percent (proportion)† | 0.2%                | 1.6%                   | 20.0%                     | 41.2%                     | 36.9%                     |
| North Africa and Middle East              | Number                | 3654 (2463–5175)    | 25897 (17543–35793)    | 333497 (239034–428325)    | 459579 (334454–588503)    | 291113 (213062–372012)    |
|                                           | Percent (all-cause)*  | 0.2% (0.1–0.2%)     | 0.5% (0.3–0.6%)        | 1% (0.8–1.1%)             | 3.3% (2.6–4%)             | 5.5% (4.3–6.8%)           |
|                                           | Percent (proportion)† | 0.3%                | 2.3%                   | 29.9%                     | 41.3%                     | 26.1%                     |
| Algeria                                   | Number                | 242 (162–340)       | 1524 (1000–2169)       | 21558 (15409–28093)       | 35180 (25530–45285)       | 26520 (19311–34271)       |
|                                           | Percent (all-cause)*  | 0.2% (0.1–0.2%)     | 0.5% (0.3–0.7%)        | 1% (0.8–1.2%)             | 3.4% (2.7–4.2%)           | 6.2% (4.8–7.7%)           |



**Table S18** Age-specific disability and death related to stroke in North Africa and Middle East countries in 2019

|                      |                       | <b>Under 5</b>  | <b>5-14 years</b> | <b>15-49 years</b>  | <b>50-69 years</b>   | <b>70+ years</b>    |
|----------------------|-----------------------|-----------------|-------------------|---------------------|----------------------|---------------------|
|                      |                       | Mean (95% UI)   | Mean (95% UI)     | Mean (95% UI)       | Mean (95% UI)        | Mean (95% UI)       |
| Bahrain              | Percent (proportion)† | 0.3%            | 1.8%              | 25.4%               | 41.4%                | 31.2%               |
|                      | Number                | 4 (3–6)         | 36 (24–52)        | 890 (631–1169)      | 886 (636–1153)       | 260 (188–332)       |
|                      | Percent (all-cause)*  | 0.2% (0.1–0.3%) | 0.5% (0.3–0.7%)   | 0.9% (0.7–1.1%)     | 1.9% (1.5–2.4%)      | 3.8% (2.9–4.7%)     |
| Egypt                | Percent (proportion)† | 0.2%            | 1.7%              | 42.9%               | 42.6%                | 12.5%               |
|                      | Number                | 663 (442–932)   | 4783 (3077–6905)  | 50971 (36346–65502) | 92206 (67207–118968) | 45237 (32561–58748) |
|                      | Percent (all-cause)*  | 0.2% (0.1–0.3%) | 0.5% (0.3–0.7%)   | 1% (0.8–1.3%)       | 4.4% (3.5–5.4%)      | 6.8% (5.3–8.4%)     |
| Iran                 | Percent (proportion)† | 0.3%            | 2.5%              | 26.3%               | 47.6%                | 23.3%               |
|                      | Number                | 377 (246–560)   | 2632 (1700–3789)  | 40135 (28114–53174) | 59745 (42427–78671)  | 45148 (31692–60213) |
|                      | Percent (all-cause)*  | 0.2% (0.1–0.3%) | 0.4% (0.3–0.6%)   | 0.8% (0.6–0.9%)     | 2.5% (2.3–2%)        | 4.6% (3.5–5.9%)     |
| Iraq                 | Percent (proportion)† | 0.3%            | 1.8%              | 27.1%               | 40.4%                | 30.5%               |
|                      | Number                | 323 (217–455)   | 2273 (1455–3232)  | 25293 (17792–32647) | 31525 (22746–40380)  | 19029 (13711–24247) |
|                      | Percent (all-cause)*  | 0.2% (0.1–0.3%) | 0.5% (0.4–0.7%)   | 1% (0.8–1.3%)       | 4.1% (3.2–5%)        | 7.2% (5.6–8.9%)     |
| Jordan               | Percent (proportion)† | 0.4%            | 2.9%              | 32.2%               | 40.2%                | 24.3%               |
|                      | Number                | 93 (63–131)     | 668 (436–952)     | 6548 (4595–8567)    | 7791 (5676–9961)     | 5415 (3885–6990)    |
|                      | Percent (all-cause)*  | 0.2% (0.2–0.3%) | 0.6% (0.4–0.9%)   | 1.1% (0.9–1.3%)     | 3.7% (2.9–4.5%)      | 7.6% (5.8–9.4%)     |
| Kuwait               | Percent (proportion)† | 0.5%            | 3.3%              | 31.9%               | 38.0%                | 26.4%               |
|                      | Number                | 18 (12–26)      | 123 (79–179)      | 2936 (2080–3846)    | 2083 (1523–2676)     | 1121 (823–1432)     |
|                      | Percent (all-cause)*  | 0.2% (0.2–0.3%) | 0.5% (0.4–0.7%)   | 0.9% (0.7–1.2%)     | 2.3% (1.8–2.8%)      | 4.5% (3.4–5.5%)     |
| Lebanon              | Percent (proportion)† | 0.3%            | 2.0%              | 46.8%               | 33.2%                | 17.8%               |
|                      | Number                | 32 (22–45)      | 199 (132–287)     | 2568 (1803–3361)    | 4258 (3058–5481)     | 4743 (3453–6031)    |
|                      | Percent (all-cause)*  | 0.2% (0.1–0.3%) | 0.5% (0.4–0.7%)   | 0.9% (0.7–1.1%)     | 2.9% (2.3–3.5%)      | 5.2% (4.6–4%)       |
| Libya                | Percent (proportion)† | 0.3%            | 1.7%              | 21.8%               | 36.1%                | 40.2%               |
|                      | Number                | 26 (18–37)      | 241 (155–344)     | 4567 (3231–5962)    | 5373 (3884–6850)     | 3535 (2544–4524)    |
|                      | Percent (all-cause)*  | 0.2% (0.1–0.3%) | 0.5% (0.3–0.7%)   | 1% (0.8–1.2%)       | 3.2% (2.5–4%)        | 5.4% (4.2–6.6%)     |
| Morocco              | Percent (proportion)† | 0.2%            | 1.8%              | 33.2%               | 39.1%                | 25.7%               |
|                      | Number                | 190 (128–266)   | 1439 (942–2073)   | 20945 (15041–26893) | 39981 (28663–51484)  | 22674 (16450–29038) |
|                      | Percent (all-cause)*  | 0.2% (0.1–0.2%) | 0.5% (0.3–0.7%)   | 1% (0.8–1.2%)       | 3.8% (3.4–7%)        | 6.1% (4.7–7.5%)     |
| Palestine            | Percent (proportion)† | 0.2%            | 1.7%              | 24.6%               | 46.9%                | 26.6%               |
|                      | Number                | 37 (25–53)      | 264 (171–372)     | 2020 (1396–2671)    | 2434 (1768–3106)     | 1587 (1140–2061)    |
|                      | Percent (all-cause)*  | 0.2% (0.1–0.3%) | 0.5% (0.3–0.6%)   | 0.7% (0.6–0.9%)     | 2.8% (2.2–3.4%)      | 5.9% (4.6–7.4%)     |
| Oman                 | Percent (proportion)† | 0.6%            | 4.2%              | 31.9%               | 38.4%                | 25.0%               |
|                      | Number                | 25 (17–36)      | 143 (94–201)      | 2717 (1897–3596)    | 1736 (1254–2242)     | 902 (660–1176)      |
|                      | Percent (all-cause)*  | 0.2% (0.1–0.2%) | 0.5% (0.4–0.7%)   | 0.9% (0.7–1.1%)     | 2.8% (2.2–3.5%)      | 6% (4.7–7.6%)       |
| Qatar                | Percent (proportion)† | 0.5%            | 2.6%              | 49.2%               | 31.4%                | 16.3%               |
|                      | Number                | 9 (6–13)        | 61 (40–87)        | 1902 (1348–2491)    | 964 (690–1235)       | 163 (118–208)       |
|                      | Percent (all-cause)*  | 0.2% (0.2–0.3%) | 0.6% (0.4–0.8%)   | 0.9% (0.7–1.1%)     | 2% (1.5–2.4%)        | 3.8% (2.9–4.7%)     |
| Saudi Arabia         | Percent (proportion)† | 0.3%            | 2.0%              | 61.4%               | 31.1%                | 5.3%                |
|                      | Number                | 176 (118–247)   | 1646 (1053–2385)  | 33384 (22997–43657) | 24908 (18204–31863)  | 8800 (6428–11201)   |
|                      | Percent (all-cause)*  | 0.3% (0.2–0.4%) | 0.8% (0.6–1.2%)   | 1.3% (1.1–6%)       | 3.6% (2.8–4.4%)      | 6.2% (4.8–7.7%)     |
| Syrian Arab Republic | Percent (proportion)† | 0.3%            | 2.4%              | 48.4%               | 36.1%                | 12.8%               |
|                      | Number                | 72 (48–101)     | 694 (455–987)     | 7988 (5696–10442)   | 13731 (10034–17495)  | 7565 (5541–9733)    |
|                      | Percent (all-cause)*  | 0.2% (0.1–0.2%) | 0.4% (0.3–0.6%)   | 1% (0.8–1.2%)       | 3.2% (2.5–3.9%)      | 5.2% (4.6–5%)       |
| Tunisia              | Percent (proportion)† | 0.2%            | 2.3%              | 26.6%               | 45.7%                | 25.2%               |
|                      | Number                | 43 (29–60)      | 292 (192–417)     | 4937 (3469–6435)    | 10896 (7986–13880)   | 8765 (6367–11150)   |
|                      | Percent (all-cause)*  | 0.2% (0.1–0.2%) | 0.4% (0.3–0.6%)   | 0.8% (0.6–1%)       | 2.8% (2.2–3.5%)      | 4.9% (3.9–6%)       |
| Türkiye              | Percent (proportion)† | 0.2%            | 1.2%              | 19.8%               | 43.7%                | 35.2%               |
|                      | Number                | 253 (169–357)   | 2142 (1405–3030)  | 40205 (28303–52472) | 65350 (47287–83209)  | 60065 (43735–76886) |
|                      | Percent (all-cause)*  | 0.2% (0.1–0.2%) | 0.4% (0.3–0.6%)   | 0.9% (0.7–1%)       | 2.5% (2.3–1%)        | 4.6% (3.6–5.7%)     |
| United Arab Emirates | Percent (proportion)† | 0.2%            | 1.3%              | 23.9%               | 38.9%                | 35.7%               |
|                      | Number                | 26 (17–37)      | 222 (143–318)     | 10331 (7427–13565)  | 7304 (5364–9492)     | 890 (642–1155)      |
|                      | Percent (all-cause)*  | 0.2% (0.2–0.3%) | 0.6% (0.4–0.9%)   | 1.4% (1.1–1.7%)     | 4.1% (3.3–5%)        | 7.8% (6.1–9.8%)     |
| Yemen                | Percent (proportion)† | 0.1%            | 1.2%              | 55.0%               | 38.9%                | 4.7%                |
|                      | Number                | 264 (176–371)   | 1782 (1176–2502)  | 14040 (10177–18258) | 15360 (11160–19679)  | 8333 (5989–10764)   |

**Table S18** Age-specific disability and death related to stroke in North Africa and Middle East countries in 2019

|                                  |                       | <b>Under 5</b>          | <b>5-14 years</b>      | <b>15-49 years</b>           | <b>50-69 years</b>           | <b>70+ years</b>             |
|----------------------------------|-----------------------|-------------------------|------------------------|------------------------------|------------------------------|------------------------------|
|                                  |                       | Mean (95% UI)           | Mean (95% UI)          | Mean (95% UI)                | Mean (95% UI)                | Mean (95% UI)                |
| Afghanistan                      | Percent (all-cause)*  | 0.1% (0.1-0.1%)         | 0.4% (0.3-0.5%)        | 0.8% (0.6-1%)                | 3.7% (2.9-4.5%)              | 5.6% (4.3-7%)                |
|                                  | Percent (proportion)† | 0.7%                    | 4.5%                   | 35.3%                        | 38.6%                        | 20.9%                        |
|                                  | Number                | 437 (293-612)           | 2425 (1570-3418)       | 18175 (13095-23568)          | 14001 (10251-17837)          | 6510 (4712-8361)             |
| Sudan                            | Percent (all-cause)*  | 0.1% (0.1-0.2%)         | 0.4% (0.3-0.6%)        | 0.8% (0.7-1%)                | 2.9% (2.2-3.6%)              | 4.3% (3.3-5.3%)              |
|                                  | Percent (proportion)† | 1.1%                    | 5.8%                   | 43.7%                        | 33.7%                        | 15.7%                        |
|                                  | Number                | 340 (230-477)           | 2284 (1487-3201)       | 21048 (15105-27468)          | 23401 (16882-30125)          | 13553 (9720-17624)           |
|                                  | Percent (all-cause)*  | 0.1% (0.1-0.2%)         | 0.5% (0.3-0.6%)        | 1% (0.8-1.2%)                | 4.2% (3.3-5.1%)              | 6% (4.7-7.6%)                |
|                                  | Percent (proportion)† | 0.6%                    | 3.8%                   | 34.7%                        | 38.6%                        | 22.4%                        |
| <b>YLLs (Years of Life Lost)</b> |                       |                         |                        |                              |                              |                              |
| Global                           | Number                | 840866 (653490-1114648) | 511960 (431942-604344) | 17903119 (16440193-19432798) | 51583806 (47709326-55492328) | 54650690 (49704353-58398599) |
|                                  | Percent (all-cause)*  | 0.2% (0.2-0.3%)         | 1% (0.8-1.1%)          | 4.6% (4.3-4.9%)              | 11.9% (11.4-12.4%)           | 15.4% (14.2-16.2%)           |
|                                  | Percent (proportion)† | 0.7%                    | 0.4%                   | 14.3%                        | 41.1%                        | 43.5%                        |
| North Africa and Middle East     | Number                | 170316 (105339-270546)  | 113448 (79866-150712)  | 1553433 (1294780-1888666)    | 2593186 (2252813-2991093)    | 2401881 (2154889-2655440)    |
|                                  | Percent (all-cause)*  | 0.6% (0.4-1%)           | 2.9% (2.1-3.8%)        | 5.7% (5.2-6.3%)              | 9.8% (9.2-10.5%)             | 13.9% (12.7-15%)             |
|                                  | Percent (proportion)† | 2.5%                    | 1.7%                   | 22.7%                        | 38.0%                        | 35.2%                        |
| Algeria                          | Number                | 3691 (2221-5802)        | 2942 (1825-4377)       | 81697 (60635-107944)         | 159520 (121390-204485)       | 211070 (169527-256476)       |
|                                  | Percent (all-cause)*  | 0.2% (0.1-0.4%)         | 1.5% (0.9-2.2%)        | 5.5% (4.4-6.9%)              | 11.2% (9.4-13.4%)            | 16.5% (14-19%)               |
|                                  | Percent (proportion)† | 0.8%                    | 0.6%                   | 17.8%                        | 34.8%                        | 46.0%                        |
| Bahrain                          | Number                | 34 (21-50)              | 21 (15-29)             | 1737 (1343-2221)             | 2457 (1894-3367)             | 1662 (1358-2147)             |
|                                  | Percent (all-cause)*  | 0.4% (0.3-0.6%)         | 0.8% (0.6-1.1%)        | 4% (3.5-4.6%)                | 4.9% (4.3-6.3%)              | 7.6% (6.6-9.7%)              |
|                                  | Percent (proportion)† | 0.6%                    | 0.4%                   | 29.4%                        | 41.6%                        | 28.1%                        |
| Egypt                            | Number                | 107137 (49825-192218)   | 64345 (38264-92979)    | 345772 (249596-469119)       | 495235 (332823-731460)       | 287621 (203669-408070)       |
|                                  | Percent (all-cause)*  | 3.7% (1.9-6.9%)         | 9.7% (6.1-13.7%)       | 8.5% (6.9-10.4%)             | 7.6% (5.8-10.4%)             | 9.3% (7-12.5%)               |
|                                  | Percent (proportion)† | 8.2%                    | 4.9%                   | 26.6%                        | 38.1%                        | 22.1%                        |
| Iran                             | Number                | 2832 (1448-4251)        | 4601 (3692-5477)       | 119247 (111943-129865)       | 261232 (241385-277728)       | 348818 (306925-376273)       |
|                                  | Percent (all-cause)*  | 0.2% (0.1-0.3%)         | 1.3% (1.1-1.6%)        | 3.8% (3.6-4.2%)              | 8.8% (8.3-9.3%)              | 13.6% (12-14.6%)             |
|                                  | Percent (proportion)† | 0.4%                    | 0.6%                   | 16.2%                        | 35.5%                        | 47.3%                        |
| Iraq                             | Number                | 5567 (3123-9378)        | 6299 (4566-8220)       | 147938 (106720-205474)       | 251137 (187410-318640)       | 193559 (161599-223002)       |
|                                  | Percent (all-cause)*  | 0.4% (0.3-0.6%)         | 2.2% (1.6-2.8%)        | 7.2% (6.4-8.8%)              | 15.4% (14.2-16.8%)           | 21.3% (19.2-23.3%)           |
|                                  | Percent (proportion)† | 0.9%                    | 1.0%                   | 24.5%                        | 41.5%                        | 32.0%                        |
| Jordan                           | Number                | 291 (166-506)           | 295 (199-492)          | 8723 (7043-10779)            | 26267 (20852-31932)          | 30026 (24104-35444)          |
|                                  | Percent (all-cause)*  | 0.1% (0.1-0.1%)         | 0.5% (0.4-0.9%)        | 3.4% (2.9-3.9%)              | 9.6% (8-10.7%)               | 16.1% (13.4-17.9%)           |
|                                  | Percent (proportion)† | 0.4%                    | 0.4%                   | 13.3%                        | 40.0%                        | 45.8%                        |
| Kuwait                           | Number                | 136 (96-186)            | 158 (115-213)          | 5748 (4593-7102)             | 6391 (5056-7957)             | 6750 (5488-8047)             |
|                                  | Percent (all-cause)*  | 0.3% (0.2-0.4%)         | 1.8% (1.3-2.3%)        | 5.5% (4.7-6.3%)              | 7.6% (6.5-8.7%)              | 12.8% (10.7-14.4%)           |
|                                  | Percent (proportion)† | 0.7%                    | 0.8%                   | 30.0%                        | 33.3%                        | 35.2%                        |
| Lebanon                          | Number                | 66 (24-155)             | 64 (30-124)            | 3477 (2149-5180)             | 6931 (4528-9813)             | 16879 (11510-21999)          |
|                                  | Percent (all-cause)*  | 0.1% (0-0.2%)           | 0.5% (0.2-0.9%)        | 2.1% (1.3-2.9%)              | 3% (2.2-4.1%)                | 6.3% (4.2-8.1%)              |
|                                  | Percent (proportion)† | 0.2%                    | 0.2%                   | 12.7%                        | 25.3%                        | 61.6%                        |
| Libya                            | Number                | 1965 (931-3274)         | 820 (474-1242)         | 19405 (13496-27109)          | 23479 (16995-31394)          | 22910 (17299-30333)          |
|                                  | Percent (all-cause)*  | 2% (1-3.1%)             | 2.8% (1.6-4.2%)        | 5% (3.8-6.5%)                | 8.8% (7.1-11.1%)             | 13.3% (10.7-17.1%)           |
|                                  | Percent (proportion)† | 2.9%                    | 1.2%                   | 28.3%                        | 34.2%                        | 33.4%                        |
| Morocco                          | Number                | 3006 (1196-5681)        | 2832 (1596-4215)       | 81789 (54839-124587)         | 257439 (186062-329222)       | 235988 (192807-287618)       |
|                                  | Percent (all-cause)*  | 0.3% (0.1-0.5%)         | 1.9% (1.1-2.8%)        | 5.8% (4.5-7.2%)              | 11.3% (9.6-13.4%)            | 16.5% (14.1-19.6%)           |
|                                  | Percent (proportion)† | 0.5%                    | 0.5%                   | 14.1%                        | 44.3%                        | 40.6%                        |
| Palestine                        | Number                | 327 (206-531)           | 216 (148-380)          | 4557 (3698-5665)             | 15620 (13037-18412)          | 17841 (15332-20275)          |
|                                  | Percent (all-cause)*  | 0.2% (0.2-0.3%)         | 0.9% (0.6-1.6%)        | 3.7% (3.2-4.4%)              | 10.6% (9.6-11.6%)            | 17.9% (16.1-19.5%)           |
|                                  | Percent (proportion)† | 0.8%                    | 0.6%                   | 11.8%                        | 40.5%                        | 46.3%                        |

**Table S18** Age-specific disability and death related to stroke in North Africa and Middle East countries in 2019

|                      |                       | <b>Under 5</b>      | <b>5-14 years</b>  | <b>15-49 years</b>     | <b>50-69 years</b>     | <b>70+ years</b>       |
|----------------------|-----------------------|---------------------|--------------------|------------------------|------------------------|------------------------|
|                      |                       | Mean (95% UI)       | Mean (95% UI)      | Mean (95% UI)          | Mean (95% UI)          | Mean (95% UI)          |
| Oman                 | Number                | 1003 (620–1465)     | 492 (347–653)      | 6999 (5490–10410)      | 8758 (7084–11018)      | 8084 (6804–9385)       |
|                      | Percent (all-cause)*  | 1.4% (0.9–2%)       | 3.2% (2.3–4.3%)    | 3.7% (3–5.4%)          | 8.5% (7.1–10.8%)       | 12.9% (11.1–14.7%)     |
|                      | Percent (proportion)† | 4.0%                | 1.9%               | 27.6%                  | 34.6%                  | 31.9%                  |
| Qatar                | Number                | 37 (20–63)          | 49 (32–74)         | 3085 (2239–4089)       | 1948 (1364–2795)       | 779 (598–1060)         |
|                      | Percent (all-cause)*  | 0.2% (0.1–0.3%)     | 1% (0.7–1.5%)      | 3.3% (2.8–4%)          | 4.3% (3.6–5.6%)        | 5.5% (4.5–7.4%)        |
|                      | Percent (proportion)† | 0.6%                | 0.8%               | 52.3%                  | 33.0%                  | 13.2%                  |
| Saudi Arabia         | Number                | 108 (37–266)        | 392 (255–597)      | 134257 (95974–185395)  | 150297 (108728–185513) | 63630 (50012–75069)    |
|                      | Percent (all-cause)*  | 0% (0–0.1%)         | 0.7% (0.4–1%)      | 5.1% (4.2–6%)          | 11% (8.3–12.6%)        | 15.7% (12.2–17.8%)     |
|                      | Percent (proportion)† | 0.0%                | 0.1%               | 38.5%                  | 43.1%                  | 18.2%                  |
| Syrian Arab Republic | Number                | 2406 (1496–3506)    | 5913 (4501–7548)   | 42244 (31195–57856)    | 88454 (63354–122541)   | 69268 (54500–86913)    |
|                      | Percent (all-cause)*  | 0.9% (0.6–1.2%)     | 5.7% (4.4–7%)      | 8% (7–8.9%)            | 10.1% (9.1–11.5%)      | 13% (11.6–14.7%)       |
|                      | Percent (proportion)† | 1.2%                | 2.8%               | 20.3%                  | 42.5%                  | 33.3%                  |
| Tunisia              | Number                | 390 (220–610)       | 446 (262–669)      | 17660 (11916–24172)    | 55416 (39104–75799)    | 78046 (58577–100328)   |
|                      | Percent (all-cause)*  | 0.2% (0.1–0.3%)     | 1.3% (0.8–1.9%)    | 5.1% (4.1–6.2%)        | 10.4% (8.7–12.1%)      | 15.7% (13–18.1%)       |
|                      | Percent (proportion)† | 0.3%                | 0.3%               | 11.6%                  | 36.5%                  | 51.4%                  |
| Türkiye              | Number                | 1704 (992–2787)     | 2409 (1635–3290)   | 97148 (75009–122772)   | 278373 (215842–351855) | 445433 (353793–549537) |
|                      | Percent (all-cause)*  | 0.1% (0.1–0.2%)     | 1.2% (0.9–1.7%)    | 5.2% (4.6–5.8%)        | 8% (7.1–8.9%)          | 13% (11.4–14.4%)       |
|                      | Percent (proportion)† | 0.2%                | 0.3%               | 11.8%                  | 33.7%                  | 54.0%                  |
| United Arab Emirates | Number                | 171 (84–297)        | 186 (114–294)      | 41297 (26187–63867)    | 30777 (21199–42702)    | 4312 (3219–5686)       |
|                      | Percent (all-cause)*  | 0.7% (0.4–1.1%)     | 1.5% (0.9–2.3%)    | 5.7% (4.4–8.6%)        | 8.5% (6.6–11.1%)       | 11.7% (9.3–15.5%)      |
|                      | Percent (proportion)† | 0.2%                | 0.2%               | 53.8%                  | 40.1%                  | 5.6%                   |
| Yemen                | Number                | 10994 (5918–19205)  | 5983 (3357–9426)   | 89583 (57932–130891)   | 137384 (101636–186522) | 104763 (78660–133741)  |
|                      | Percent (all-cause)*  | 0.3% (0.2–0.5%)     | 1.1% (0.6–1.6%)    | 3.9% (2.8–5.1%)        | 12.3% (9.9–14.8%)      | 17% (13.1–20.6%)       |
|                      | Percent (proportion)† | 3.2%                | 1.7%               | 25.7%                  | 39.4%                  | 30.0%                  |
| Afghanistan          | Number                | 5095 (2883–10845)   | 4362 (2051–7074)   | 182007 (129177–258289) | 171464 (115165–233178) | 103362 (68738–136411)  |
|                      | Percent (all-cause)*  | 0.1% (0–0.1%)       | 0.6% (0.3–1%)      | 5.6% (4.6–6.5%)        | 11% (8.5–13.3%)        | 14.3% (10.1–17.9%)     |
|                      | Percent (proportion)† | 1.1%                | 0.9%               | 39.0%                  | 36.8%                  | 22.2%                  |
| Sudan                | Number                | 23183 (10692–42154) | 10506 (5017–18460) | 117484 (67607–184188)  | 161972 (112811–233942) | 148641 (109777–202905) |
|                      | Percent (all-cause)*  | 0.5% (0.3–0.9%)     | 2.4% (1.2–4%)      | 5.9% (4.1–8.5%)        | 12.6% (9.7–17.2%)      | 17.1% (12.8–22.9%)     |
|                      | Percent (proportion)† | 5.0%                | 2.3%               | 25.4%                  | 35.1%                  | 32.2%                  |

DALYs, Disability-Adjusted Life Years; NC, neurological condition; UI, uncertainty interval; YLDs, Years Lived with Disability; YLLs, Years of Life Lost. Count data are absolute numbers and percentage data are rounded to one decimal place. Percentages and number of DALYs, deaths, YLDs, and YLLs are not mutually exclusive: the sum of percentages and number of DALYs, deaths, YLDs, and YLLs in the columns exceeds the totals for all causes combined because of overlap between various causes. Measures with insufficient data are not reported here. \*Percent of all-cause indicates the proportion of the specified measure (ie, DALYs, deaths, YDLs, or YLLs) of stroke out of all causes in the age-group in the region/nation. †Percent proportion indicates the share of the specified measure (ie, DALYs, deaths, YDLs, or YLLs) of stroke in different age-groups in the region/nation. Data in parentheses are 95% uncertainty intervals. Stroke include ischaemic stroke, intracerebral haemorrhage, and subarachnoid haemorrhage.

***Table S19 Age-specific disability and death related to Alzheimer's disease in North Africa and Middle East countries in 2019***  
(NEXT PAGE)

**Table S19** Age-specific disability and death related to Alzheimer's disease and other dementias in North Africa and Middle East countries in 2019

|                                               |                       | Under 5       | 5-14 years    | 15-49 years           | 50-69 years               | 70+ years                   |
|-----------------------------------------------|-----------------------|---------------|---------------|-----------------------|---------------------------|-----------------------------|
|                                               |                       | Mean (95% UI) | Mean (95% UI) | Mean (95% UI)         | Mean (95% UI)             | Mean (95% UI)               |
| <b>DALYs (Disability-Adjusted Life Years)</b> |                       |               |               |                       |                           |                             |
| Global                                        | Number                |               |               | 217455 (63432–597751) | 4013666 (1619463–9422508) | 21045868 (9429356–45714619) |
|                                               | Percent (all-cause)*  |               |               | 0% (0–0.1%)           | 0.6% (0.2–1.4%)           | 4.3% (2.9–7%)               |
|                                               | Percent (proportion)† |               |               | 0.9%                  | 15.9%                     | 83.3%                       |
| North Africa and Middle East                  | Number                |               |               | 17143 (5020–48553)    | 240759 (98904–565373)     | 950162 (424991–2122937)     |
|                                               | Percent (all-cause)*  |               |               | 0% (0–0.1%)           | 0.6% (0.2–1.4%)           | 4.2% (1.9–9.5%)             |
|                                               | Percent (proportion)† |               |               | 1.4%                  | 19.9%                     | 78.7%                       |
| Algeria                                       | Number                |               |               | 1369 (375–3942)       | 19818 (7928–48729)        | 74386 (32784–174779)        |
|                                               | Percent (all-cause)*  |               |               | 0% (0–0.1%)           | 0.8% (0.3–1.9%)           | 4.3% (1.9–10.2%)            |
|                                               | Percent (proportion)† |               |               | 1.4%                  | 20.7%                     | 77.8%                       |
| Bahrain                                       | Number                |               |               | 69 (19–199)           | 681 (283–1606)            | 943 (417–2167)              |
|                                               | Percent (all-cause)*  |               |               | 0% (0–0.1%)           | 0.7% (0.3–1.7%)           | 3.3% (1.4–7.6%)             |
|                                               | Percent (proportion)† |               |               | 4.1%                  | 40.2%                     | 55.7%                       |
| Egypt                                         | Number                |               |               | 2064 (634–5715)       | 34909 (14379–87057)       | 98599 (44060–221608)        |
|                                               | Percent (all-cause)*  |               |               | 0% (0–0.1%)           | 0.4% (0.2–1%)             | 2.6% (1.2–6%)               |
|                                               | Percent (proportion)† |               |               | 1.5%                  | 25.7%                     | 72.7%                       |
| Iran                                          | Number                |               |               | 2353 (694–6394)       | 40883 (16574–96284)       | 184892 (82798–409859)       |
|                                               | Percent (all-cause)*  |               |               | 0% (0–0.1%)           | 0.8% (0.3–1.8%)           | 5.2% (2.4–11.6%)            |
|                                               | Percent (proportion)† |               |               | 1.0%                  | 17.9%                     | 81.0%                       |
| Iraq                                          | Number                |               |               | 1043 (310–3021)       | 12437 (5063–29498)        | 44018 (19300–96479)         |
|                                               | Percent (all-cause)*  |               |               | 0% (0–0.1%)           | 0.5% (0.2–1.2%)           | 3.7% (1.7–8.5%)             |
|                                               | Percent (proportion)† |               |               | 1.8%                  | 21.6%                     | 76.6%                       |
| Jordan                                        | Number                |               |               | 309 (92–855)          | 3532 (1444–8281)          | 10986 (4912–24011)          |
|                                               | Percent (all-cause)*  |               |               | 0% (0–0.1%)           | 0.7% (0.3–1.7%)           | 4.3% (2.9–7%)               |
|                                               | Percent (proportion)† |               |               | 2.1%                  | 23.8%                     | 74.1%                       |
| Kuwait                                        | Number                |               |               | 181 (53–506)          | 1405 (573–3305)           | 5274 (2375–11230)           |
|                                               | Percent (all-cause)*  |               |               | 0% (0–0.1%)           | 0.8% (0.3–1.9%)           | 6.7% (3.1–14.8%)            |
|                                               | Percent (proportion)† |               |               | 2.6%                  | 20.5%                     | 76.9%                       |
| Lebanon                                       | Number                |               |               | 145 (42–419)          | 2566 (1069–6166)          | 17016 (7398–38218)          |
|                                               | Percent (all-cause)*  |               |               | 0% (0–0.1%)           | 0.7% (0.3–1.6%)           | 4.7% (2.1–10.5%)            |
|                                               | Percent (proportion)† |               |               | 0.7%                  | 13.0%                     | 86.3%                       |
| Libya                                         | Number                |               |               | 278 (73–819)          | 2801 (1086–6760)          | 13516 (5768–29748)          |
|                                               | Percent (all-cause)*  |               |               | 0% (0–0.1%)           | 0.6% (0.3–1.6%)           | 5.7% (2.5–12.9%)            |
|                                               | Percent (proportion)† |               |               | 1.7%                  | 16.9%                     | 81.4%                       |
| Morocco                                       | Number                |               |               | 1113 (305–3221)       | 18641 (7377–43564)        | 66429 (28751–150844)        |
|                                               | Percent (all-cause)*  |               |               | 0% (0–0.1%)           | 0.6% (0.2–1.3%)           | 3.7% (1.7–8.7%)             |
|                                               | Percent (proportion)† |               |               | 1.3%                  | 21.6%                     | 77.1%                       |
| Palestine                                     | Number                |               |               | 104 (30–294)          | 1318 (524–3144)           | 4397 (1922–10338)           |
|                                               | Percent (all-cause)*  |               |               | 0% (0–0.1%)           | 0.6% (0.2–1.3%)           | 3.5% (1.5–8%)               |
|                                               | Percent (proportion)† |               |               | 1.8%                  | 22.6%                     | 75.6%                       |
| Oman                                          | Number                |               |               | 116 (34–328)          | 1000 (394–2349)           | 2197 (944–5092)             |
|                                               | Percent (all-cause)*  |               |               | 0% (0–0.1%)           | 0.6% (0.2–1.5%)           | 2.8% (1.2–6.6%)             |
|                                               | Percent (proportion)† |               |               | 3.5%                  | 30.2%                     | 66.3%                       |
| Qatar                                         | Number                |               |               | 102 (29–295)          | 650 (260–1537)            | 451 (194–1044)              |
|                                               | Percent (all-cause)*  |               |               | 0% (0–0.1%)           | 0.7% (0.3–1.6%)           | 2.4% (1.5–7%)               |
|                                               | Percent (proportion)† |               |               | 8.5%                  | 54.1%                     | 37.5%                       |
| Saudi Arabia                                  | Number                |               |               | 1375 (385–3838)       | 10055 (4038–23734)        | 21101 (9127–47496)          |
|                                               | Percent (all-cause)*  |               |               | 0% (0–0.1%)           | 0.5% (0.2–1.1%)           | 3.8% (1.7–8.6%)             |
|                                               | Percent (proportion)† |               |               | 4.2%                  | 30.9%                     | 64.9%                       |
| Syrian Arab Republic                          | Number                |               |               | 447 (129–1275)        | 7433 (3034–17567)         | 22808 (9882–52894)          |
|                                               | Percent (all-cause)*  |               |               | 0% (0–0.1%)           | 0.6% (0.2–1.3%)           | 3.3% (1.5–7.7%)             |
|                                               | Percent (proportion)† |               |               | 1.5%                  | 24.2%                     | 74.3%                       |

**Table S19** Age-specific disability and death related to Alzheimer's disease and other dementias in North Africa and Middle East countries in 2019

|                              |                       | Under 5       | 5-14 years    | 15-49 years      | 50-69 years           | 70+ years                |
|------------------------------|-----------------------|---------------|---------------|------------------|-----------------------|--------------------------|
|                              |                       | Mean (95% UI) | Mean (95% UI) | Mean (95% UI)    | Mean (95% UI)         | Mean (95% UI)            |
| Tunisia                      | Number                |               |               | 406 (115–1155)   | 7583 (3076–18450)     | 34032 (14988–76188)      |
|                              | Percent (all-cause)*  |               |               | 0% (0–0.1%)      | 0.8% (0.3–1.9%)       | 5% (2.2–11.2%)           |
|                              | Percent (proportion)† |               |               | 1.0%             | 18.0%                 | 81.0%                    |
| Türkiye                      | Number                |               |               | 2661 (797–7473)  | 49981 (20502–117841)  | 261022 (117846–585163)   |
|                              | Percent (all-cause)*  |               |               | 0% (0–0.1%)      | 0.8% (0.4–1.9%)       | 5.5% (2.5–11.9%)         |
|                              | Percent (proportion)† |               |               | 0.8%             | 15.9%                 | 83.2%                    |
| United Arab Emirates         | Number                |               |               | 601 (148–1848)   | 2220 (842–5522)       | 1263 (551–2896)          |
|                              | Percent (all-cause)*  |               |               | 0% (0–0.1%)      | 0.4% (0.2–1%)         | 2.6% (1.2–6.1%)          |
|                              | Percent (proportion)† |               |               | 14.7%            | 54.4%                 | 30.9%                    |
| Yemen                        | Number                |               |               | 585 (161–1695)   | 7201 (2825–17255)     | 23992 (10360–55822)      |
|                              | Percent (all-cause)*  |               |               | 0% (0–0%)        | 0.5% (0.2–1.1%)       | 3.1% (1.4–7.5%)          |
|                              | Percent (proportion)† |               |               | 1.8%             | 22.7%                 | 75.5%                    |
| Afghanistan                  | Number                |               |               | 971 (254–2846)   | 6110 (2275–14838)     | 23857 (9823–55888)       |
|                              | Percent (all-cause)*  |               |               | 0% (0–0.1%)      | 0.3% (0.1–0.7%)       | 2.7% (1.1–6.5%)          |
|                              | Percent (proportion)† |               |               | 3.1%             | 19.7%                 | 77.1%                    |
| Sudan                        | Number                |               |               | 834 (242–2410)   | 9289 (3690–22342)     | 38018 (16922–87440)      |
|                              | Percent (all-cause)*  |               |               | 0% (0–0.1%)      | 0.5% (0.2–1.2%)       | 3.5% (1.6–8%)            |
|                              | Percent (proportion)† |               |               | 1.7%             | 19.3%                 | 79.0%                    |
| <b>Deaths</b>                |                       |               |               |                  |                       |                          |
| Global                       | Number                |               |               | 4002 (521–12748) | 107114 (23167–311942) | 1512160 (381998–3937954) |
|                              | Percent (all-cause)*  |               |               | 0.1% (0–0.2%)    | 0.7% (0.2–2.1%)       | 5.3% (1.3–14.1%)         |
|                              | Percent (proportion)† |               |               | 0.2%             | 6.6%                  | 93.2%                    |
| North Africa and Middle East | Number                |               |               | 317 (40–1066)    | 6410 (1366–18809)     | 63755 (15830–169586)     |
|                              | Percent (all-cause)*  |               |               | 0.1% (0–0.2%)    | 0.7% (0.1–2.1%)       | 4.8% (1.2–13.2%)         |
|                              | Percent (proportion)† |               |               | 0.4%             | 9.1%                  | 90.5%                    |
| Algeria                      | Number                |               |               | 26 (3–86)        | 535 (118–1567)        | 4648 (1104–13354)        |
|                              | Percent (all-cause)*  |               |               | 0.1% (0–0.3%)    | 1.1% (0.2–3.2%)       | 4.5% (1–12.8%)           |
|                              | Percent (proportion)† |               |               | 0.5%             | 10.3%                 | 89.2%                    |
| Bahrain                      | Number                |               |               | 1 (0–4)          | 17 (4–51)             | 55 (13–150)              |
|                              | Percent (all-cause)*  |               |               | 0.1% (0–0.5%)    | 1% (0.2–2.9%)         | 3.5% (0.8–10%)           |
|                              | Percent (proportion)† |               |               | 1.7%             | 23.4%                 | 74.8%                    |
| Egypt                        | Number                |               |               | 37 (4–124)       | 924 (194–2839)        | 5957 (1357–16407)        |
|                              | Percent (all-cause)*  |               |               | 0% (0–0.2%)      | 0.4% (0.1–1.2%)       | 2.7% (0.6–7.6%)          |
|                              | Percent (proportion)† |               |               | 0.5%             | 13.4%                 | 86.1%                    |
| Iran                         | Number                |               |               | 43 (6–137)       | 1083 (228–3149)       | 12784 (3183–33808)       |
|                              | Percent (all-cause)*  |               |               | 0.1% (0–0.2%)    | 1.1% (0.2–3%)         | 6.1% (1.5–16.1%)         |
|                              | Percent (proportion)† |               |               | 0.3%             | 7.8%                  | 91.9%                    |
| Iraq                         | Number                |               |               | 19 (2–65)        | 332 (69–997)          | 2907 (703–7528)          |
|                              | Percent (all-cause)*  |               |               | 0.1% (0–0.2%)    | 0.6% (0.1–1.7%)       | 4.3% (1–12.1%)           |
|                              | Percent (proportion)† |               |               | 0.6%             | 10.2%                 | 89.2%                    |
| Jordan                       | Number                |               |               | 6 (1–19)         | 92 (20–267)           | 670 (164–1759)           |
|                              | Percent (all-cause)*  |               |               | 0.1% (0–0.4%)    | 1% (0.2–2.8%)         | 4.9% (1.2–13.3%)         |
|                              | Percent (proportion)† |               |               | 0.7%             | 12.0%                 | 87.3%                    |
| Kuwait                       | Number                |               |               | 3 (0–11)         | 35 (8–103)            | 386 (98–968)             |
|                              | Percent (all-cause)*  |               |               | 0.2% (0–0.5%)    | 1.3% (0.3–3.7%)       | 8.5% (2.1–22.1%)         |
|                              | Percent (proportion)† |               |               | 0.8%             | 8.3%                  | 90.9%                    |
| Lebanon                      | Number                |               |               | 3 (0–9)          | 69 (15–200)           | 1184 (286–3211)          |
|                              | Percent (all-cause)*  |               |               | 0.1% (0–0.3%)    | 0.8% (0.2–2.5%)       | 5.5% (1.3–14.7%)         |
|                              | Percent (proportion)† |               |               | 0.2%             | 5.5%                  | 94.3%                    |
| Libya                        | Number                |               |               | 5 (1–18)         | 77 (15–226)           | 1012 (258–2581)          |
|                              | Percent (all-cause)*  |               |               | 0.1% (0–0.2%)    | 0.8% (0.2–2.5%)       | 7.4% (1.9–18.9%)         |
|                              | Percent (proportion)† |               |               | 0.5%             | 7.0%                  | 92.5%                    |

**Table S19** Age-specific disability and death related to Alzheimer's disease and other dementias in North Africa and Middle East countries in 2019

|                                           |                       | Under 5       | 5-14 years    | 15-49 years         | 50-69 years              | 70+ years                 |
|-------------------------------------------|-----------------------|---------------|---------------|---------------------|--------------------------|---------------------------|
|                                           |                       | Mean (95% UI) | Mean (95% UI) | Mean (95% UI)       | Mean (95% UI)            | Mean (95% UI)             |
| Morocco                                   | Number                |               |               | 21 (2–70)           | 506 (103–1491)           | 4418 (1007–12015)         |
|                                           | Percent (all-cause)*  |               |               | 0·1% (0–0·2%)       | 0·6% (0·1–1·9%)          | 4% (0·9–11·4%)            |
|                                           | Percent (proportion)† |               |               | 0·4%                | 10·2%                    | 89·3%                     |
| Palestine                                 | Number                |               |               | 2 (0–6)             | 35 (7–104)               | 289 (67–826)              |
|                                           | Percent (all-cause)*  |               |               | 0·1% (0–0·3%)       | 0·7% (0·1–2%)            | 3·9% (0·9–10·9%)          |
|                                           | Percent (proportion)† |               |               | 0·6%                | 10·7%                    | 88·8%                     |
| Oman                                      | Number                |               |               | 2 (0–7)             | 26 (5–76)                | 134 (30–377)              |
|                                           | Percent (all-cause)*  |               |               | 0·1% (0–0·2%)       | 0·7% (0·2–2·1%)          | 3·1% (0·7–8·6%)           |
|                                           | Percent (proportion)† |               |               | 1·3%                | 16·1%                    | 82·6%                     |
| Qatar                                     | Number                |               |               | 2 (0–6)             | 16 (3–48)                | 23 (5–65)                 |
|                                           | Percent (all-cause)*  |               |               | 0·1% (0–0·4%)       | 1·1% (0·2–3·1%)          | 2·4% (0·5–7%)             |
|                                           | Percent (proportion)† |               |               | 4·6%                | 39·7%                    | 55·8%                     |
| Saudi Arabia                              | Number                |               |               | 26 (3–84)           | 260 (56–744)             | 1421 (340–3670)           |
|                                           | Percent (all-cause)*  |               |               | 0·1% (0–0·2%)       | 0·6% (0·1–1·7%)          | 4·8% (1·2–12·7%)          |
|                                           | Percent (proportion)† |               |               | 1·5%                | 15·3%                    | 83·2%                     |
| Syrian Arab Republic                      | Number                |               |               | 8 (1–27)            | 198 (40–579)             | 1385 (325–3909)           |
|                                           | Percent (all-cause)*  |               |               | 0·1% (0–0·3%)       | 0·7% (0·1–1·9%)          | 3·5% (0·8–9·8%)           |
|                                           | Percent (proportion)† |               |               | 0·5%                | 12·4%                    | 87·0%                     |
| Tunisia                                   | Number                |               |               | 8 (1–25)            | 204 (41–614)             | 2335 (554–6277)           |
|                                           | Percent (all-cause)*  |               |               | 0·1% (0–0·4%)       | 1·1% (0·2–3·2%)          | 5·9% (1·4–15·9%)          |
|                                           | Percent (proportion)† |               |               | 0·3%                | 8·0%                     | 91·7%                     |
| Türkiye                                   | Number                |               |               | 48 (6–163)          | 1327 (287–3947)          | 18346 (4639–50529)        |
|                                           | Percent (all-cause)*  |               |               | 0·1% (0–0·4%)       | 1·1% (0·2–3·1%)          | 6·6% (1·6–17·3%)          |
|                                           | Percent (proportion)† |               |               | 0·2%                | 6·7%                     | 93·0%                     |
| United Arab Emirates                      | Number                |               |               | 12 (1–40)           | 57 (11–170)              | 70 (16–196)               |
|                                           | Percent (all-cause)*  |               |               | 0·1% (0–0·3%)       | 0·5% (0·1–1·5%)          | 2·9% (0·7–8·2%)           |
|                                           | Percent (proportion)† |               |               | 8·5%                | 41·1%                    | 50·4%                     |
| Yemen                                     | Number                |               |               | 11 (1–36)           | 196 (40–589)             | 1524 (360–4192)           |
|                                           | Percent (all-cause)*  |               |               | 0% (0–0·1%)         | 0·5% (0·1–1·5%)          | 3·5% (0·8–9·7%)           |
|                                           | Percent (proportion)† |               |               | 0·6%                | 11·3%                    | 88·1%                     |
| Afghanistan                               | Number                |               |               | 19 (2–61)           | 169 (34–500)             | 1587 (379–4360)           |
|                                           | Percent (all-cause)*  |               |               | 0% (0–0·1%)         | 0·3% (0·1–1%)            | 3·1% (0·7–8·7%)           |
|                                           | Percent (proportion)† |               |               | 1·1%                | 9·5%                     | 89·4%                     |
| Sudan                                     | Number                |               |               | 15 (2–51)           | 245 (51–738)             | 2554 (601–7032)           |
|                                           | Percent (all-cause)*  |               |               | 0% (0–0·1%)         | 0·6% (0·1–1·6%)          | 3·9% (0·9–11·4%)          |
|                                           | Percent (proportion)† |               |               | 0·5%                | 8·7%                     | 90·7%                     |
| <b>YLDs (Years Lived with Disability)</b> |                       |               |               |                     |                          |                           |
| Global                                    | Number                |               |               | 47056 (25759–76245) | 1146141 (752252–1697743) | 6223872 (4354736–8378321) |
|                                           | Percent (all-cause)*  |               |               | 0% (0–0%)           | 0·5% (0·3–0·6%)          | 4·8% (3·8–6%)             |
|                                           | Percent (proportion)† |               |               | 0·6%                | 15·5%                    | 83·9%                     |
| North Africa and Middle East              | Number                |               |               | 3615 (1936–5908)    | 68650 (44992–100885)     | 279920 (196403–379895)    |
|                                           | Percent (all-cause)*  |               |               | 0% (0–0%)           | 0·5% (0·4–0·7%)          | 5·2% (4·1–6·5%)           |
|                                           | Percent (proportion)† |               |               | 1·0%                | 19·5%                    | 79·5%                     |
| Algeria                                   | Number                |               |               | 263 (129–458)       | 5469 (3572–8028)         | 21619 (15168–29473)       |
|                                           | Percent (all-cause)*  |               |               | 0% (0–0%)           | 0·5% (0·4–0·7%)          | 5·1% (3·9–6·4%)           |
|                                           | Percent (proportion)† |               |               | 1·0%                | 20·0%                    | 79·0%                     |
| Bahrain                                   | Number                |               |               | 15 (7–28)           | 203 (134–297)            | 274 (193–372)             |
|                                           | Percent (all-cause)*  |               |               | 0% (0–0%)           | 0·4% (0·3–0·6%)          | 4% (3·1–5%)               |
|                                           | Percent (proportion)† |               |               | 3·1%                | 41·3%                    | 55·6%                     |
| Egypt                                     | Number                |               |               | 485 (253–796)       | 10216 (6650–15077)       | 30501 (21163–41337)       |
|                                           | Percent (all-cause)*  |               |               | 0% (0–0%)           | 0·5% (0·3–0·7%)          | 4·5% (3·6–5·7%)           |
|                                           | Percent (proportion)† |               |               | 1·2%                | 24·8%                    | 74·0%                     |



**Table S19** Age-specific disability and death related to Alzheimer’s disease and other dementias in North Africa and Middle East countries in 2019

|                      |                       | Under 5       | 5-14 years    | 15-49 years    | 50-69 years        | 70+ years            |
|----------------------|-----------------------|---------------|---------------|----------------|--------------------|----------------------|
|                      |                       | Mean (95% UI) | Mean (95% UI) | Mean (95% UI)  | Mean (95% UI)      | Mean (95% UI)        |
| Iran                 | Number                |               |               | 518 (270–855)  | 11792 (7679–17518) | 54981 (38434–74776)  |
|                      | Percent (all-cause)*  |               |               | 0% (0–0%)      | 0.5% (0.4–0.7%)    | 5.6% (4.4–7%)        |
|                      | Percent (proportion)† |               |               | 0.8%           | 17.5%              | 81.7%                |
| Iraq                 | Number                |               |               | 220 (109–378)  | 3500 (2292–5225)   | 12926 (9108–17594)   |
|                      | Percent (all-cause)*  |               |               | 0% (0–0%)      | 0.5% (0.3–0.6%)    | 4.9% (3.8–6.1%)      |
|                      | Percent (proportion)† |               |               | 1.3%           | 21.0%              | 77.7%                |
| Jordan               | Number                |               |               | 67 (33–111)    | 1030 (672–1520)    | 3381 (2358–4635)     |
|                      | Percent (all-cause)*  |               |               | 0% (0–0%)      | 0.5% (0.3–0.7%)    | 4.7% (3.7–5.9%)      |
|                      | Percent (proportion)† |               |               | 1.5%           | 23.0%              | 75.5%                |
| Kuwait               | Number                |               |               | 41 (19–72)     | 413 (265–605)      | 1591 (1107–2153)     |
|                      | Percent (all-cause)*  |               |               | 0% (0–0%)      | 0.5% (0.3–0.6%)    | 6.3% (4.9–7.8%)      |
|                      | Percent (proportion)† |               |               | 2.0%           | 20.2%              | 77.8%                |
| Lebanon              | Number                |               |               | 33 (16–56)     | 758 (495–1108)     | 4931 (3467–6626)     |
|                      | Percent (all-cause)*  |               |               | 0% (0–0%)      | 0.5% (0.4–0.7%)    | 5.3% (4.2–6.7%)      |
|                      | Percent (proportion)† |               |               | 0.6%           | 13.2%              | 86.2%                |
| Libya                | Number                |               |               | 52 (25–90)     | 713 (469–1043)     | 3591 (2510–4873)     |
|                      | Percent (all-cause)*  |               |               | 0% (0–0%)      | 0.4% (0.3–0.6%)    | 5.4% (4.2–6.8%)      |
|                      | Percent (proportion)† |               |               | 1.2%           | 16.4%              | 82.4%                |
| Morocco              | Number                |               |               | 225 (116–366)  | 5087 (3305–7546)   | 19420 (13572–26247)  |
|                      | Percent (all-cause)*  |               |               | 0% (0–0%)      | 0.5% (0.3–0.7%)    | 5.2% (4.1–6.5%)      |
|                      | Percent (proportion)† |               |               | 0.9%           | 20.6%              | 78.5%                |
| Palestine            | Number                |               |               | 22 (11–37)     | 376 (244–558)      | 1281 (901–1747)      |
|                      | Percent (all-cause)*  |               |               | 0% (0–0%)      | 0.4% (0.3–0.6%)    | 4.8% (3.8–6%)        |
|                      | Percent (proportion)† |               |               | 1.3%           | 22.4%              | 76.3%                |
| Oman                 | Number                |               |               | 25 (13–44)     | 281 (182–421)      | 601 (419–808)        |
|                      | Percent (all-cause)*  |               |               | 0% (0–0%)      | 0.5% (0.3–0.6%)    | 4% (3.1–5%)          |
|                      | Percent (proportion)† |               |               | 2.8%           | 31.0%              | 66.2%                |
| Qatar                | Number                |               |               | 21 (11–36)     | 189 (121–283)      | 128 (90–178)         |
|                      | Percent (all-cause)*  |               |               | 0% (0–0%)      | 0.4% (0.3–0.5%)    | 2.9% (2.2–3.8%)      |
|                      | Percent (proportion)† |               |               | 6.3%           | 55.8%              | 37.8%                |
| Saudi Arabia         | Number                |               |               | 282 (142–484)  | 2847 (1825–4187)   | 5983 (4181–8089)     |
|                      | Percent (all-cause)*  |               |               | 0% (0–0%)      | 0.4% (0.3–0.6%)    | 4.2% (3.3–5.3%)      |
|                      | Percent (proportion)† |               |               | 3.1%           | 31.2%              | 65.7%                |
| Syrian Arab Republic | Number                |               |               | 98 (47–167)    | 2125 (1364–3135)   | 6585 (4595–9063)     |
|                      | Percent (all-cause)*  |               |               | 0% (0–0%)      | 0.5% (0.3–0.7%)    | 4.5% (3.5–5.7%)      |
|                      | Percent (proportion)† |               |               | 1.1%           | 24.1%              | 74.8%                |
| Tunisia              | Number                |               |               | 85 (42–142)    | 2142 (1397–3166)   | 9866 (6848–13406)    |
|                      | Percent (all-cause)*  |               |               | 0% (0–0%)      | 0.6% (0.4–0.8%)    | 5.5% (4.3–6.9%)      |
|                      | Percent (proportion)† |               |               | 0.7%           | 17.7%              | 81.6%                |
| Türkiye              | Number                |               |               | 608 (314–1035) | 14812 (9656–21937) | 77306 (53605–105361) |
|                      | Percent (all-cause)*  |               |               | 0% (0–0%)      | 0.6% (0.4–0.8%)    | 5.9% (4.6–7.3%)      |
|                      | Percent (proportion)† |               |               | 0.7%           | 16.0%              | 83.4%                |
| United Arab Emirates | Number                |               |               | 97 (48–161)    | 568 (349–856)      | 367 (258–506)        |
|                      | Percent (all-cause)*  |               |               | 0% (0–0%)      | 0.3% (0.2–0.5%)    | 3.2% (2.5–4.1%)      |
|                      | Percent (proportion)† |               |               | 9.4%           | 55.0%              | 35.6%                |
| Yemen                | Number                |               |               | 117 (61–192)   | 1960 (1286–2917)   | 6977 (4869–9524)     |
|                      | Percent (all-cause)*  |               |               | 0% (0–0%)      | 0.5% (0.3–0.6%)    | 4.7% (3.7–5.9%)      |
|                      | Percent (proportion)† |               |               | 1.3%           | 21.6%              | 77.1%                |
| Afghanistan          | Number                |               |               | 164 (87–270)   | 1446 (936–2118)    | 5880 (4071–7989)     |
|                      | Percent (all-cause)*  |               |               | 0% (0–0%)      | 0.3% (0.2–0.4%)    | 3.8% (2.9–4.8%)      |
|                      | Percent (proportion)† |               |               | 2.2%           | 19.3%              | 78.5%                |
| Sudan                | Number                |               |               | 173 (93–280)   | 2654 (1761–3930)   | 11448 (8006–15587)   |

**Table S19** Age-specific disability and death related to Alzheimer's disease and other dementias in North Africa and Middle East countries in 2019

|                                  |                       | Under 5       | 5-14 years    | 15-49 years           | 50-69 years              | 70+ years                   |
|----------------------------------|-----------------------|---------------|---------------|-----------------------|--------------------------|-----------------------------|
|                                  |                       | Mean (95% UI) | Mean (95% UI) | Mean (95% UI)         | Mean (95% UI)            | Mean (95% UI)               |
|                                  | Percent (all-cause)*  |               |               | 0% (0-0%)             | 0.5% (0.3-0.6%)          | 5.1% (3.9-6.4%)             |
|                                  | Percent (proportion)† |               |               | 1.2%                  | 18.6%                    | 80.2%                       |
| <b>YLLs (Years of Life Lost)</b> |                       |               |               |                       |                          |                             |
| Global                           | Number                |               |               | 170399 (22090-542810) | 2867525 (615307-8288018) | 14821996 (3659226-39694582) |
|                                  | Percent (all-cause)*  |               |               | 0% (0-0.1%)           | 0.7% (0.1-2%)            | 4.2% (1-11.4%)              |
|                                  | Percent (proportion)† |               |               | 1.0%                  | 16.1%                    | 83.0%                       |
| North Africa and Middle East     | Number                |               |               | 13528 (1713-45549)    | 172109 (35923-506948)    | 670241 (163027-1824261)     |
|                                  | Percent (all-cause)*  |               |               | 0% (0-0.2%)           | 0.6% (0.1-1.9%)          | 3.9% (0.9-11%)              |
|                                  | Percent (proportion)† |               |               | 1.6%                  | 20.1%                    | 78.3%                       |
| Algeria                          | Number                |               |               | 1106 (129-3685)       | 14349 (3101-42664)       | 52767 (12501-149097)        |
|                                  | Percent (all-cause)*  |               |               | 0.1% (0-0.2%)         | 1% (0.2-2.9%)            | 4.1% (1-11.8%)              |
|                                  | Percent (proportion)† |               |               | 1.6%                  | 21.0%                    | 77.3%                       |
| Bahrain                          | Number                |               |               | 54 (6-182)            | 478 (104-1410)           | 670 (158-1820)              |
|                                  | Percent (all-cause)*  |               |               | 0.1% (0-0.4%)         | 1% (0.2-2.7%)            | 3% (0.7-8.8%)               |
|                                  | Percent (proportion)† |               |               | 4.5%                  | 39.8%                    | 55.7%                       |
| Egypt                            | Number                |               |               | 1579 (190-5289)       | 24693 (5047-75572)       | 68098 (15379-189014)        |
|                                  | Percent (all-cause)*  |               |               | 0% (0-0.1%)           | 0.4% (0.1-1.1%)          | 2.2% (0.5-6.2%)             |
|                                  | Percent (proportion)† |               |               | 1.7%                  | 26.2%                    | 72.2%                       |
| Iran                             | Number                |               |               | 1835 (238-5868)       | 29091 (6060-84765)       | 129911 (31662-353397)       |
|                                  | Percent (all-cause)*  |               |               | 0.1% (0-0.2%)         | 1% (0.2-2.9%)            | 5.1% (1.2-13.9%)            |
|                                  | Percent (proportion)† |               |               | 1.1%                  | 18.1%                    | 80.8%                       |
| Iraq                             | Number                |               |               | 823 (101-2799)        | 8937 (1842-26535)        | 31092 (7279-82073)          |
|                                  | Percent (all-cause)*  |               |               | 0% (0-0.1%)           | 0.5% (0.1-1.6%)          | 3.4% (0.8-9.7%)             |
|                                  | Percent (proportion)† |               |               | 2.0%                  | 21.9%                    | 76.1%                       |
| Jordan                           | Number                |               |               | 242 (29-795)          | 2502 (535-7297)          | 7605 (1820-20831)           |
|                                  | Percent (all-cause)*  |               |               | 0.1% (0-0.3%)         | 0.9% (0.2-2.7%)          | 4.1% (1-11.4%)              |
|                                  | Percent (proportion)† |               |               | 2.3%                  | 24.2%                    | 73.5%                       |
| Kuwait                           | Number                |               |               | 140 (17-465)          | 992 (213-2907)           | 3683 (928-9479)             |
|                                  | Percent (all-cause)*  |               |               | 0.1% (0-0.4%)         | 1.2% (0.2-3.4%)          | 7% (1.7-18.5%)              |
|                                  | Percent (proportion)† |               |               | 2.9%                  | 20.6%                    | 76.5%                       |
| Lebanon                          | Number                |               |               | 113 (13-386)          | 1808 (386-5262)          | 12085 (2879-33139)          |
|                                  | Percent (all-cause)*  |               |               | 0.1% (0-0.2%)         | 0.8% (0.2-2.3%)          | 4.5% (1.1-12.1%)            |
|                                  | Percent (proportion)† |               |               | 0.8%                  | 12.9%                    | 86.3%                       |
| Libya                            | Number                |               |               | 225 (27-766)          | 2089 (413-6152)          | 9925 (2488-26131)           |
|                                  | Percent (all-cause)*  |               |               | 0.1% (0-0.2%)         | 0.8% (0.2-2.3%)          | 5.8% (1.4-15.3%)            |
|                                  | Percent (proportion)† |               |               | 1.8%                  | 17.1%                    | 81.1%                       |
| Morocco                          | Number                |               |               | 888 (106-2979)        | 13554 (2787-39141)       | 47009 (10918-131462)        |
|                                  | Percent (all-cause)*  |               |               | 0.1% (0-0.2%)         | 0.6% (0.1-1.7%)          | 3.3% (0.8-9.4%)             |
|                                  | Percent (proportion)† |               |               | 1.4%                  | 22.1%                    | 76.5%                       |
| Palestine                        | Number                |               |               | 81 (11-274)           | 942 (195-2758)           | 3116 (727-9132)             |
|                                  | Percent (all-cause)*  |               |               | 0.1% (0-0.2%)         | 0.6% (0.1-1.9%)          | 3.1% (0.7-9.1%)             |
|                                  | Percent (proportion)† |               |               | 2.0%                  | 22.8%                    | 75.3%                       |
| Oman                             | Number                |               |               | 91 (12-309)           | 719 (145-2059)           | 1596 (356-4488)             |
|                                  | Percent (all-cause)*  |               |               | 0% (0-0.2%)           | 0.7% (0.1-2%)            | 2.5% (0.6-7.2%)             |
|                                  | Percent (proportion)† |               |               | 3.8%                  | 29.9%                    | 66.3%                       |
| Qatar                            | Number                |               |               | 80 (9-269)            | 461 (94-1356)            | 323 (76-915)                |
|                                  | Percent (all-cause)*  |               |               | 0.1% (0-0.3%)         | 1% (0.2-3%)              | 2.3% (0.5-6.4%)             |
|                                  | Percent (proportion)† |               |               | 9.3%                  | 53.4%                    | 37.3%                       |
| Saudi Arabia                     | Number                |               |               | 1093 (129-3593)       | 7208 (1513-20985)        | 15118 (3632-41220)          |
|                                  | Percent (all-cause)*  |               |               | 0% (0-0.1%)           | 0.5% (0.1-1.5%)          | 3.7% (0.9-10.2%)            |
|                                  | Percent (proportion)† |               |               | 4.7%                  | 30.8%                    | 64.6%                       |
| Syrian Arab                      | Number                |               |               | 349 (43-1130)         | 5308 (1064-15576)        | 16223 (3759-46742)          |

**Table S19** Age-specific disability and death related to Alzheimer's disease and other dementias in North Africa and Middle East countries in 2019

|                      |                       | <b>Under 5</b> | <b>5-14 years</b> | <b>15-49 years</b> | <b>50-69 years</b>  | <b>70+ years</b>      |
|----------------------|-----------------------|----------------|-------------------|--------------------|---------------------|-----------------------|
|                      |                       | Mean (95% UI)  | Mean (95% UI)     | Mean (95% UI)      | Mean (95% UI)       | Mean (95% UI)         |
| Republic             | Percent (all-cause)*  |                |                   | 0·1% (0-0·2%)      | 0·6% (0·1-1·7%)     | 3% (0·7-8·5%)         |
|                      | Percent (proportion)† |                |                   | 1·6%               | 24·3%               | 74·1%                 |
| Tunisia              | Number                |                |                   | 320 (39-1080)      | 5440 (1075-16468)   | 24166 (5663-65210)    |
|                      | Percent (all-cause)*  |                |                   | 0·1% (0-0·3%)      | 1% (0·2-3%)         | 4·9% (1·1-13·4%)      |
| Türkiye              | Number                |                |                   | 2053 (272-6935)    | 35169 (7554-104356) | 183716 (46763-517375) |
|                      | Percent (all-cause)*  |                |                   | 0·1% (0-0·4%)      | 1% (0·2-2·8%)       | 5·4% (1·3-14·6%)      |
| United Arab Emirates | Number                |                |                   | 505 (57-1738)      | 1652 (322-4950)     | 896 (207-2537)        |
|                      | Percent (all-cause)*  |                |                   | 0·1% (0-0·2%)      | 0·5% (0·1-1·4%)     | 2·4% (0·5-6·9%)       |
| Yemen                | Number                |                |                   | 468 (52-1554)      | 5241 (1049-15385)   | 17015 (3956-47211)    |
|                      | Percent (all-cause)*  |                |                   | 0% (0-0·1%)        | 0·5% (0·1-1·4%)     | 2·8% (0·6-8%)         |
| Afghanistan          | Number                |                |                   | 807 (102-2623)     | 4664 (921-13627)    | 17977 (4222-48674)    |
|                      | Percent (all-cause)*  |                |                   | 0% (0-0·1%)        | 0·3% (0·1-0·9%)     | 2·5% (0·6-7%)         |
| Sudan                | Number                |                |                   | 661 (76-2196)      | 6634 (1327-19892)   | 26570 (6144-76171)    |
|                      | Percent (all-cause)*  |                |                   | 0% (0-0·1%)        | 0·5% (0·1-1·5%)     | 3·1% (0·7-8·7%)       |
|                      | Percent (proportion)† |                |                   | 2·0%               | 19·6%               | 78·5%                 |

DALYs, Disability-Adjusted Life Years; NC, neurological condition; UI, uncertainty interval; YLDs, Years Lived with Disability; YLLs, Years of Life Lost. Count data are absolute numbers and percentage data are rounded to one decimal place. Percentages and number of DALYs, YLDs, YLLs, deaths, incident cases, and prevalent cases are not mutually exclusive: the sum of percentages and number of DALYs, deaths, YLDs, and YLLs in the columns exceeds the totals for all causes combined because of overlap between various causes. Measures with insufficient data are not reported here. \*Percent of all-cause indicates the proportion of the specified measure (ie, DALYs, deaths, YDLs, or YLLs) of Alzheimer's disease and other dementias out of all causes in the age-group in the region/nation. †Percent proportion indicates the share of the specified measure (ie, DALYs, deaths, YDLs, or YLLs) of Alzheimer's disease and other dementias in different age-groups in the region/nation. Data in parentheses are 95% uncertainty intervals.

***Table S20 Age-specific disability and death related to Parkinson's disease in North Africa and Middle East countries in 2019***  
(NEXT PAGE)

**Table S20** Age-specific disability and death related to Parkinson's disease in North Africa and Middle East countries in 2019

|                                               |                       | Under 5       | 5-14 years    | 15-49 years            | 50-69 years               | 70+ years                 |
|-----------------------------------------------|-----------------------|---------------|---------------|------------------------|---------------------------|---------------------------|
|                                               |                       | Mean (95% UI) | Mean (95% UI) | Mean (95% UI)          | Mean (95% UI)             | Mean (95% UI)             |
| <b>DALYs (Disability-Adjusted Life Years)</b> |                       |               |               |                        |                           |                           |
| Global                                        | Number                |               |               | 167349 (139424–204373) | 1469531 (1306329–1664080) | 4655736 (4236098–5000462) |
|                                               | Percent (all-cause)*  |               |               | 0% (0–0%)              | 0.2% (0.2–0.2%)           | 1% (0.9–1%)               |
|                                               | Percent (proportion)† |               |               | 2.7%                   | 23.4%                     | 74.0%                     |
| North Africa and Middle East                  | Number                |               |               | 15964 (13263–19424)    | 88811 (77628–104049)      | 195922 (172810–246304)    |
|                                               | Percent (all-cause)*  |               |               | 0% (0–0%)              | 0.2% (0.2–0.2%)           | 0.9% (0.8–1.1%)           |
|                                               | Percent (proportion)† |               |               | 5.3%                   | 29.5%                     | 65.2%                     |
| Algeria                                       | Number                |               |               | 1048 (780–1346)        | 5513 (4313–6955)          | 15147 (12234–18295)       |
|                                               | Percent (all-cause)*  |               |               | 0% (0–0%)              | 0.2% (0.2–0.3%)           | 0.9% (0.8–1.1%)           |
|                                               | Percent (proportion)† |               |               | 4.8%                   | 25.4%                     | 69.8%                     |
| Bahrain                                       | Number                |               |               | 36 (26–50)             | 191 (134–242)             | 240 (174–290)             |
|                                               | Percent (all-cause)*  |               |               | 0% (0–0%)              | 0.2% (0.1–0.2%)           | 0.8% (0.6–1%)             |
|                                               | Percent (proportion)† |               |               | 7.8%                   | 40.9%                     | 51.4%                     |
| Egypt                                         | Number                |               |               | 1990 (1435–2765)       | 18619 (14234–24993)       | 27734 (21536–40618)       |
|                                               | Percent (all-cause)*  |               |               | 0% (0–0%)              | 0.2% (0.2–0.3%)           | 0.7% (0.6–1.1%)           |
|                                               | Percent (proportion)† |               |               | 4.1%                   | 38.5%                     | 57.4%                     |
| Iran                                          | Number                |               |               | 2108 (1623–2575)       | 12853 (10198–14535)       | 33818 (29672–37251)       |
|                                               | Percent (all-cause)*  |               |               | 0% (0–0%)              | 0.2% (0.2–0.3%)           | 1% (0.8–1.1%)             |
|                                               | Percent (proportion)† |               |               | 4.3%                   | 26.3%                     | 69.3%                     |
| Iraq                                          | Number                |               |               | 978 (723–1336)         | 4214 (3169–6403)          | 9780 (8112–13107)         |
|                                               | Percent (all-cause)*  |               |               | 0% (0–0%)              | 0.2% (0.2–0.3%)           | 0.8% (0.7–1.1%)           |
|                                               | Percent (proportion)† |               |               | 6.5%                   | 28.1%                     | 65.3%                     |
| Jordan                                        | Number                |               |               | 184 (142–243)          | 968 (804–1181)            | 2382 (2009–2788)          |
|                                               | Percent (all-cause)*  |               |               | 0% (0–0%)              | 0.2% (0.2–0.2%)           | 0.9% (0.8–1%)             |
|                                               | Percent (proportion)† |               |               | 5.2%                   | 27.4%                     | 67.4%                     |
| Kuwait                                        | Number                |               |               | 84 (60–118)            | 300 (245–363)             | 669 (551–788)             |
|                                               | Percent (all-cause)*  |               |               | 0% (0–0%)              | 0.2% (0.1–0.2%)           | 0.9% (0.7–1%)             |
|                                               | Percent (proportion)† |               |               | 7.9%                   | 28.5%                     | 63.6%                     |
| Lebanon                                       | Number                |               |               | 96 (70–130)            | 709 (542–928)             | 2856 (2334–3829)          |
|                                               | Percent (all-cause)*  |               |               | 0% (0–0%)              | 0.2% (0.1–0.2%)           | 0.8% (0.7–1.1%)           |
|                                               | Percent (proportion)† |               |               | 2.6%                   | 19.4%                     | 78.0%                     |
| Libya                                         | Number                |               |               | 267 (195–358)          | 1114 (817–1442)           | 2330 (1798–2986)          |
|                                               | Percent (all-cause)*  |               |               | 0% (0–0%)              | 0.3% (0.2–0.3%)           | 1% (0.8–1.2%)             |
|                                               | Percent (proportion)† |               |               | 7.2%                   | 30.0%                     | 62.8%                     |
| Morocco                                       | Number                |               |               | 1085 (765–1512)        | 8492 (6415–10504)         | 15692 (13024–18198)       |
|                                               | Percent (all-cause)*  |               |               | 0% (0–0%)              | 0.3% (0.2–0.3%)           | 0.9% (0.8–1%)             |
|                                               | Percent (proportion)† |               |               | 4.3%                   | 33.6%                     | 62.1%                     |
| Palestine                                     | Number                |               |               | 65 (47–84)             | 466 (332–554)             | 1082 (755–1247)           |
|                                               | Percent (all-cause)*  |               |               | 0% (0–0%)              | 0.2% (0.1–0.2%)           | 0.9% (0.6–0.9%)           |
|                                               | Percent (proportion)† |               |               | 4.0%                   | 28.9%                     | 67.1%                     |
| Oman                                          | Number                |               |               | 68 (47–100)            | 273 (220–342)             | 756 (474–875)             |
|                                               | Percent (all-cause)*  |               |               | 0% (0–0%)              | 0.2% (0.1–0.2%)           | 1% (0.6–1.1%)             |
|                                               | Percent (proportion)† |               |               | 6.2%                   | 24.9%                     | 68.9%                     |
| Qatar                                         | Number                |               |               | 69 (48–95)             | 217 (154–293)             | 203 (128–271)             |
|                                               | Percent (all-cause)*  |               |               | 0% (0–0%)              | 0.2% (0.2–0.3%)           | 1.1% (0.7–1.3%)           |
|                                               | Percent (proportion)† |               |               | 14.1%                  | 44.3%                     | 41.6%                     |
| Saudi Arabia                                  | Number                |               |               | 1412 (1070–1862)       | 4099 (3286–4923)          | 6076 (4402–7106)          |
|                                               | Percent (all-cause)*  |               |               | 0% (0–0%)              | 0.2% (0.2–0.2%)           | 1.1% (0.8–1.3%)           |
|                                               | Percent (proportion)† |               |               | 12.2%                  | 35.4%                     | 52.4%                     |
| Syrian Arab Republic                          | Number                |               |               | 260 (188–349)          | 2247 (1648–2899)          | 5280 (3554–6608)          |
|                                               | Percent (all-cause)*  |               |               | 0% (0–0%)              | 0.2% (0.1–0.2%)           | 0.8% (0.5–0.9%)           |
|                                               | Percent (proportion)† |               |               | 3.3%                   | 28.9%                     | 67.8%                     |

**Table S20** Age-specific disability and death related to Parkinson's disease in North Africa and Middle East countries in 2019

|                              |                       | Under 5       | 5-14 years    | 15-49 years      | 50-69 years         | 70+ years              |
|------------------------------|-----------------------|---------------|---------------|------------------|---------------------|------------------------|
|                              |                       | Mean (95% UI) | Mean (95% UI) | Mean (95% UI)    | Mean (95% UI)       | Mean (95% UI)          |
| Tunisia                      | Number                |               |               | 253 (180–344)    | 2057 (1533–2763)    | 5961 (4619–7711)       |
|                              | Percent (all-cause)*  |               |               | 0% (0–0%)        | 0.2% (0.2–0.3%)     | 0.9% (0.7–1.1%)        |
|                              | Percent (proportion)† |               |               | 3.1%             | 24.9%               | 72.1%                  |
| Türkiye                      | Number                |               |               | 2101 (1639–2705) | 13847 (10758–22143) | 46231 (35855–80458)    |
|                              | Percent (all-cause)*  |               |               | 0% (0–0%)        | 0.2% (0.2–0.4%)     | 1% (0.8–1.7%)          |
|                              | Percent (proportion)† |               |               | 3.4%             | 22.3%               | 74.4%                  |
| United Arab Emirates         | Number                |               |               | 799 (561–1117)   | 1589 (1089–2100)    | 509 (335–654)          |
|                              | Percent (all-cause)*  |               |               | 0.1% (0–0.1%)    | 0.3% (0.2–0.4%)     | 1.1% (0.7–1.3%)        |
|                              | Percent (proportion)† |               |               | 27.6%            | 54.9%               | 17.6%                  |
| Yemen                        | Number                |               |               | 615 (421–911)    | 2781 (2031–3845)    | 4767 (3807–5985)       |
|                              | Percent (all-cause)*  |               |               | 0% (0–0%)        | 0.2% (0.1–0.2%)     | 0.6% (0.5–0.8%)        |
|                              | Percent (proportion)† |               |               | 7.5%             | 34.1%               | 58.4%                  |
| Afghanistan                  | Number                |               |               | 1567 (890–2307)  | 4084 (2867–5530)    | 5923 (4753–7304)       |
|                              | Percent (all-cause)*  |               |               | 0% (0–0%)        | 0.2% (0.1–0.3%)     | 0.7% (0.6–0.8%)        |
|                              | Percent (proportion)† |               |               | 13.5%            | 35.3%               | 51.2%                  |
| Sudan                        | Number                |               |               | 863 (577–1244)   | 4088 (2932–5516)    | 8287 (6685–10182)      |
|                              | Percent (all-cause)*  |               |               | 0% (0–0%)        | 0.2% (0.2–0.3%)     | 0.8% (0.6–0.9%)        |
|                              | Percent (proportion)† |               |               | 6.5%             | 30.9%               | 62.6%                  |
| <b>Deaths</b>                |                       |               |               |                  |                     |                        |
| Global                       | Number                |               |               | 2297 (2093–2512) | 38717 (35959–41549) | 321893 (287088–344825) |
|                              | Percent (all-cause)*  |               |               | 0% (0–0%)        | 0.3% (0.2–0.3%)     | 1.1% (1–1.2%)          |
|                              | Percent (proportion)† |               |               | 0.6%             | 10.7%               | 88.7%                  |
| North Africa and Middle East | Number                |               |               | 265 (223–313)    | 2611 (2273–3079)    | 13908 (11945–18301)    |
|                              | Percent (all-cause)*  |               |               | 0.1% (0–0.1%)    | 0.3% (0.3–0.3%)     | 1% (0.9–1.4%)          |
|                              | Percent (proportion)† |               |               | 1.6%             | 15.6%               | 82.9%                  |
| Algeria                      | Number                |               |               | 17 (12–23)       | 154 (115–200)       | 1111 (886–1369)        |
|                              | Percent (all-cause)*  |               |               | 0.1% (0–0.1%)    | 0.3% (0.3–0.4%)     | 1.1% (0.9–1.3%)        |
|                              | Percent (proportion)† |               |               | 1.3%             | 12.0%               | 86.6%                  |
| Bahrain                      | Number                |               |               | 0 (0–1)          | 5 (3–7)             | 16 (11–20)             |
|                              | Percent (all-cause)*  |               |               | 0.1% (0–0.1%)    | 0.3% (0.2–0.4%)     | 1% (0.7–1.2%)          |
|                              | Percent (proportion)† |               |               | 2.1%             | 23.4%               | 74.5%                  |
| Egypt                        | Number                |               |               | 32 (22–50)       | 585 (429–819)       | 1822 (1385–2846)       |
|                              | Percent (all-cause)*  |               |               | 0% (0–0.1%)      | 0.3% (0.2–0.3%)     | 0.8% (0.7–1.3%)        |
|                              | Percent (proportion)† |               |               | 1.3%             | 24.0%               | 74.7%                  |
| Iran                         | Number                |               |               | 31 (23–35)       | 360 (278–398)       | 2457 (2096–2722)       |
|                              | Percent (all-cause)*  |               |               | 0.1% (0–0.1%)    | 0.4% (0.3–0.4%)     | 1.2% (1–1.3%)          |
|                              | Percent (proportion)† |               |               | 1.1%             | 12.7%               | 86.2%                  |
| Iraq                         | Number                |               |               | 17 (12–24)       | 121 (87–198)        | 705 (577–929)          |
|                              | Percent (all-cause)*  |               |               | 0% (0–0.1%)      | 0.2% (0.2–0.3%)     | 1% (0.9–1.4%)          |
|                              | Percent (proportion)† |               |               | 2.0%             | 14.4%               | 83.6%                  |
| Jordan                       | Number                |               |               | 3 (2–3)          | 27 (22–33)          | 163 (135–193)          |
|                              | Percent (all-cause)*  |               |               | 0.1% (0–0.1%)    | 0.3% (0.3–0.3%)     | 1.2% (1–1.3%)          |
|                              | Percent (proportion)† |               |               | 1.4%             | 13.8%               | 84.8%                  |
| Kuwait                       | Number                |               |               | 1 (1–1)          | 7 (6–9)             | 50 (39–59)             |
|                              | Percent (all-cause)*  |               |               | 0% (0–0.1%)      | 0.3% (0.2–0.3%)     | 1.1% (0.9–1.3%)        |
|                              | Percent (proportion)† |               |               | 1.6%             | 12.8%               | 85.6%                  |
| Lebanon                      | Number                |               |               | 1 (1–2)          | 20 (15–28)          | 204 (162–282)          |
|                              | Percent (all-cause)*  |               |               | 0% (0–0.1%)      | 0.3% (0.2–0.4%)     | 1% (0.8–1.3%)          |
|                              | Percent (proportion)† |               |               | 0.7%             | 9.0%                | 90.3%                  |
| Libya                        | Number                |               |               | 5 (3–7)          | 32 (22–43)          | 165 (123–216)          |
|                              | Percent (all-cause)*  |               |               | 0.1% (0–0.1%)    | 0.4% (0.3–0.4%)     | 1.2% (0.9–1.5%)        |
|                              | Percent (proportion)† |               |               | 2.3%             | 16.0%               | 81.7%                  |

**Table S20** Age-specific disability and death related to Parkinson's disease in North Africa and Middle East countries in 2019

|                                           |                       | Under 5       | 5-14 years    | 15-49 years          | 50-69 years            | 70+ years              |
|-------------------------------------------|-----------------------|---------------|---------------|----------------------|------------------------|------------------------|
|                                           |                       | Mean (95% UI) | Mean (95% UI) | Mean (95% UI)        | Mean (95% UI)          | Mean (95% UI)          |
| Morocco                                   | Number                |               |               | 19 (12–29)           | 262 (188–331)          | 1109 (909–1286)        |
|                                           | Percent (all-cause)*  |               |               | 0·1% (0·1–0·1%)      | 0·3% (0·3–0·4%)        | 1% (0·9–1·2%)          |
|                                           | Percent (proportion)† |               |               | 1·4%                 | 18·8%                  | 79·8%                  |
| Palestine                                 | Number                |               |               | 1 (1–1)              | 14 (9–16)              | 78 (51–90)             |
|                                           | Percent (all-cause)*  |               |               | 0% (0–0%)            | 0·3% (0·2–0·3%)        | 1% (0·7–1·2%)          |
|                                           | Percent (proportion)† |               |               | 1·0%                 | 14·8%                  | 84·1%                  |
| Oman                                      | Number                |               |               | 1 (1–1)              | 7 (6–9)                | 52 (29–61)             |
|                                           | Percent (all-cause)*  |               |               | 0% (0–0%)            | 0·2% (0·2–0·3%)        | 1·2% (0·7–1·4%)        |
|                                           | Percent (proportion)† |               |               | 1·2%                 | 12·0%                  | 86·8%                  |
| Qatar                                     | Number                |               |               | 1 (1–1)              | 6 (4–8)                | 13 (7–17)              |
|                                           | Percent (all-cause)*  |               |               | 0·1% (0·0–0·1%)      | 0·4% (0·3–0·4%)        | 1·3% (0·8–1·6%)        |
|                                           | Percent (proportion)† |               |               | 4·7%                 | 29·2%                  | 66·2%                  |
| Saudi Arabia                              | Number                |               |               | 24 (17–32)           | 115 (89–140)           | 424 (287–503)          |
|                                           | Percent (all-cause)*  |               |               | 0% (0–0·1%)          | 0·3% (0·2–0·3%)        | 1·4% (0·9–1·7%)        |
|                                           | Percent (proportion)† |               |               | 4·2%                 | 20·4%                  | 75·4%                  |
| Syrian Arab Republic                      | Number                |               |               | 4 (3–5)              | 65 (43–87)             | 366 (239–461)          |
|                                           | Percent (all-cause)*  |               |               | 0% (0–0%)            | 0·2% (0·2–0·2%)        | 0·9% (0·6–1·1%)        |
|                                           | Percent (proportion)† |               |               | 0·9%                 | 14·9%                  | 84·2%                  |
| Tunisia                                   | Number                |               |               | 4 (3–6)              | 59 (41–84)             | 422 (313–556)          |
|                                           | Percent (all-cause)*  |               |               | 0·1% (0·0–0·1%)      | 0·3% (0·3–0·4%)        | 1·1% (0·9–1·3%)        |
|                                           | Percent (proportion)† |               |               | 0·8%                 | 12·2%                  | 87·0%                  |
| Türkiye                                   | Number                |               |               | 34 (26–43)           | 390 (288–718)          | 3415 (2580–6374)       |
|                                           | Percent (all-cause)*  |               |               | 0·1% (0·1–0·1%)      | 0·3% (0·3–0·6%)        | 1·2% (1–2·3%)          |
|                                           | Percent (proportion)† |               |               | 0·9%                 | 10·2%                  | 89·0%                  |
| United Arab Emirates                      | Number                |               |               | 14 (9–21)            | 45 (28–62)             | 31 (19–41)             |
|                                           | Percent (all-cause)*  |               |               | 0·1% (0·1–0·1%)      | 0·4% (0·3–0·5%)        | 1·3% (0·8–1·6%)        |
|                                           | Percent (proportion)† |               |               | 15·9%                | 49·6%                  | 34·5%                  |
| Yemen                                     | Number                |               |               | 11 (7–17)            | 85 (60–122)            | 317 (250–410)          |
|                                           | Percent (all-cause)*  |               |               | 0% (0–0%)            | 0·2% (0·2–0·3%)        | 0·7% (0·6–0·9%)        |
|                                           | Percent (proportion)† |               |               | 2·6%                 | 20·6%                  | 76·8%                  |
| Afghanistan                               | Number                |               |               | 31 (16–48)           | 124 (85–170)           | 404 (322–502)          |
|                                           | Percent (all-cause)*  |               |               | 0·1% (0·0–0·1%)      | 0·2% (0·2–0·3%)        | 0·8% (0·7–1%)          |
|                                           | Percent (proportion)† |               |               | 5·6%                 | 22·2%                  | 72·1%                  |
| Sudan                                     | Number                |               |               | 15 (9–23)            | 124 (84–173)           | 572 (454–713)          |
|                                           | Percent (all-cause)*  |               |               | 0% (0–0·1%)          | 0·3% (0·2–0·4%)        | 0·9% (0·7–1·1%)        |
|                                           | Percent (proportion)† |               |               | 2·1%                 | 17·4%                  | 80·5%                  |
| <b>YLDs (Years Lived with Disability)</b> |                       |               |               |                      |                        |                        |
| Global                                    | Number                |               |               | 66229 (40135–102877) | 434898 (293184–618932) | 708966 (498500–952772) |
|                                           | Percent (all-cause)*  |               |               | 0% (0–0%)            | 0·2% (0·1–0·2%)        | 0·5% (0·4–0·7%)        |
|                                           | Percent (proportion)† |               |               | 5·5%                 | 35·9%                  | 58·6%                  |
| North Africa and Middle East              | Number                |               |               | 4368 (2485–7114)     | 16886 (11132–24744)    | 23251 (16222–30943)    |
|                                           | Percent (all-cause)*  |               |               | 0% (0–0%)            | 0·1% (0·1–0·2%)        | 0·4% (0·3–0·6%)        |
|                                           | Percent (proportion)† |               |               | 9·8%                 | 37·9%                  | 52·2%                  |
| Algeria                                   | Number                |               |               | 300 (152–517)        | 1246 (786–1883)        | 1895 (1284–2624)       |
|                                           | Percent (all-cause)*  |               |               | 0% (0–0%)            | 0·1% (0·1–0·2%)        | 0·4% (0·3–0·6%)        |
|                                           | Percent (proportion)† |               |               | 8·7%                 | 36·2%                  | 55·1%                  |
| Bahrain                                   | Number                |               |               | 17 (8–29)            | 52 (32–78)             | 30 (20–42)             |
|                                           | Percent (all-cause)*  |               |               | 0% (0–0%)            | 0·1% (0·1–0·2%)        | 0·4% (0·3–0·6%)        |
|                                           | Percent (proportion)† |               |               | 17·2%                | 52·4%                  | 30·4%                  |
| Egypt                                     | Number                |               |               | 581 (305–1005)       | 2811 (1755–4123)       | 2974 (1974–4227)       |
|                                           | Percent (all-cause)*  |               |               | 0% (0–0%)            | 0·1% (0·1–0·2%)        | 0·4% (0·3–0·6%)        |
|                                           | Percent (proportion)† |               |               | 9·1%                 | 44·2%                  | 46·7%                  |



**Table S20** Age-specific disability and death related to Parkinson's disease in North Africa and Middle East countries in 2019

|                      |                       | Under 5       | 5-14 years    | 15-49 years    | 50-69 years      | 70+ years        |
|----------------------|-----------------------|---------------|---------------|----------------|------------------|------------------|
|                      |                       | Mean (95% UI) | Mean (95% UI) | Mean (95% UI)  | Mean (95% UI)    | Mean (95% UI)    |
| Iran                 | Number                |               |               | 745 (438–1161) | 2944 (1928–4274) | 4378 (2954–6002) |
|                      | Percent (all-cause)*  |               |               | 0% (0–0%)      | 0·1% (0·1–0·2%)  | 0·4% (0·3–0·6%)  |
|                      | Percent (proportion)† |               |               | 9·2%           | 36·5%            | 54·3%            |
| Iraq                 | Number                |               |               | 247 (131–420)  | 827 (526–1229)   | 998 (675–1366)   |
|                      | Percent (all-cause)*  |               |               | 0% (0–0%)      | 0·1% (0·1–0·2%)  | 0·4% (0·3–0·5%)  |
|                      | Percent (proportion)† |               |               | 11·9%          | 39·9%            | 48·2%            |
| Jordan               | Number                |               |               | 70 (35–127)    | 233 (147–349)    | 298 (199–408)    |
|                      | Percent (all-cause)*  |               |               | 0% (0–0%)      | 0·1% (0·1–0·2%)  | 0·4% (0·3–0·5%)  |
|                      | Percent (proportion)† |               |               | 11·7%          | 38·8%            | 49·6%            |
| Kuwait               | Number                |               |               | 43 (21–76)     | 90 (56–137)      | 99 (67–135)      |
|                      | Percent (all-cause)*  |               |               | 0% (0–0%)      | 0·1% (0·1–0·1%)  | 0·4% (0·3–0·5%)  |
|                      | Percent (proportion)† |               |               | 18·4%          | 39·0%            | 42·6%            |
| Lebanon              | Number                |               |               | 32 (15–56)     | 158 (98–241)     | 379 (264–523)    |
|                      | Percent (all-cause)*  |               |               | 0% (0–0%)      | 0·1% (0·1–0·2%)  | 0·4% (0·3–0·5%)  |
|                      | Percent (proportion)† |               |               | 5·6%           | 27·7%            | 66·7%            |
| Libya                | Number                |               |               | 65 (34–110)    | 204 (130–305)    | 280 (186–390)    |
|                      | Percent (all-cause)*  |               |               | 0% (0–0%)      | 0·1% (0·1–0·2%)  | 0·4% (0·3–0·6%)  |
|                      | Percent (proportion)† |               |               | 11·9%          | 37·2%            | 51·0%            |
| Morocco              | Number                |               |               | 266 (140–448)  | 1310 (841–1975)  | 1383 (923–1923)  |
|                      | Percent (all-cause)*  |               |               | 0% (0–0%)      | 0·1% (0·1–0·2%)  | 0·4% (0·3–0·5%)  |
|                      | Percent (proportion)† |               |               | 9·0%           | 44·3%            | 46·7%            |
| Palestine            | Number                |               |               | 24 (12–40)     | 87 (55–132)      | 107 (72–149)     |
|                      | Percent (all-cause)*  |               |               | 0% (0–0%)      | 0·1% (0·1–0·1%)  | 0·4% (0·3–0·5%)  |
|                      | Percent (proportion)† |               |               | 10·9%          | 39·9%            | 49·2%            |
| Oman                 | Number                |               |               | 37 (19–68)     | 76 (48–117)      | 85 (57–120)      |
|                      | Percent (all-cause)*  |               |               | 0% (0–0%)      | 0·1% (0·1–0·2%)  | 0·6% (0·4–0·7%)  |
|                      | Percent (proportion)† |               |               | 18·8%          | 38·2%            | 42·9%            |
| Qatar                | Number                |               |               | 30 (16–53)     | 60 (37–92)       | 22 (14–30)       |
|                      | Percent (all-cause)*  |               |               | 0% (0–0%)      | 0·1% (0·1–0·2%)  | 0·5% (0·4–0·7%)  |
|                      | Percent (proportion)† |               |               | 26·9%          | 53·5%            | 19·5%            |
| Saudi Arabia         | Number                |               |               | 383 (201–653)  | 818 (518–1244)   | 727 (508–1007)   |
|                      | Percent (all-cause)*  |               |               | 0% (0–0%)      | 0·1% (0·1–0·2%)  | 0·5% (0·4–0·7%)  |
|                      | Percent (proportion)† |               |               | 19·9%          | 42·4%            | 37·7%            |
| Syrian Arab Republic | Number                |               |               | 93 (47–160)    | 478 (298–732)    | 626 (422–878)    |
|                      | Percent (all-cause)*  |               |               | 0% (0–0%)      | 0·1% (0·1–0·2%)  | 0·4% (0·3–0·6%)  |
|                      | Percent (proportion)† |               |               | 7·8%           | 39·9%            | 52·3%            |
| Tunisia              | Number                |               |               | 83 (42–140)    | 457 (287–701)    | 783 (531–1085)   |
|                      | Percent (all-cause)*  |               |               | 0% (0–0%)      | 0·1% (0·1–0·2%)  | 0·4% (0·3–0·6%)  |
|                      | Percent (proportion)† |               |               | 6·3%           | 34·5%            | 59·2%            |
| Türkiye              | Number                |               |               | 612 (325–1074) | 3292 (2028–5078) | 6388 (4310–8784) |
|                      | Percent (all-cause)*  |               |               | 0% (0–0%)      | 0·1% (0·1–0·2%)  | 0·5% (0·4–0·6%)  |
|                      | Percent (proportion)† |               |               | 5·9%           | 32·0%            | 62·1%            |
| United Arab Emirates | Number                |               |               | 169 (87–287)   | 247 (154–381)    | 58 (39–80)       |
|                      | Percent (all-cause)*  |               |               | 0% (0–0%)      | 0·1% (0·1–0·2%)  | 0·5% (0·4–0·7%)  |
|                      | Percent (proportion)† |               |               | 35·6%          | 52·2%            | 12·2%            |
| Yemen                | Number                |               |               | 147 (76–255)   | 422 (260–629)    | 480 (322–672)    |
|                      | Percent (all-cause)*  |               |               | 0% (0–0%)      | 0·1% (0·1–0·1%)  | 0·3% (0·2–0·4%)  |
|                      | Percent (proportion)† |               |               | 14·0%          | 40·2%            | 45·8%            |
| Afghanistan          | Number                |               |               | 209 (113–337)  | 414 (267–625)    | 436 (289–616)    |
|                      | Percent (all-cause)*  |               |               | 0% (0–0%)      | 0·1% (0·1–0·1%)  | 0·3% (0·2–0·4%)  |
|                      | Percent (proportion)† |               |               | 19·7%          | 39·1%            | 41·2%            |
| Sudan                | Number                |               |               | 213 (108–372)  | 641 (395–962)    | 801 (553–1132)   |
|                      | Percent (all-cause)*  |               |               | 0% (0–0%)      | 0·1% (0·1–0·2%)  | 0·4% (0·3–0·5%)  |

**Table S20** Age-specific disability and death related to Parkinson's disease in North Africa and Middle East countries in 2019

|                                  |                       | Under 5       | 5-14 years    | 15-49 years           | 50-69 years              | 70+ years                 |
|----------------------------------|-----------------------|---------------|---------------|-----------------------|--------------------------|---------------------------|
|                                  |                       | Mean (95% UI) | Mean (95% UI) | Mean (95% UI)         | Mean (95% UI)            | Mean (95% UI)             |
| Percent (proportion)†            |                       |               |               | 12.9%                 | 38.7%                    | 48.4%                     |
| <b>YLLs (Years of Life Lost)</b> |                       |               |               |                       |                          |                           |
| Global                           | Number                |               |               | 101119 (92186–110703) | 1034633 (960744–1106747) | 3946770 (3581846–4212751) |
|                                  | Percent (all-cause)*  |               |               | 0% (0–0%)             | 0.2% (0.2–0.2%)          | 1.1% (1–1.2%)             |
|                                  | Percent (proportion)† |               |               | 2.0%                  | 20.4%                    | 77.7%                     |
| North Africa and Middle East     | Number                |               |               | 11596 (9734–13684)    | 71926 (62639–84837)      | 172671 (150564–222188)    |
|                                  | Percent (all-cause)*  |               |               | 0% (0–0%)             | 0.3% (0.3–0.3%)          | 1% (0.9–1.3%)             |
|                                  | Percent (proportion)† |               |               | 4.5%                  | 28.1%                    | 67.4%                     |
| Algeria                          | Number                |               |               | 748 (530–993)         | 4267 (3194–5559)         | 13252 (10508–16399)       |
|                                  | Percent (all-cause)*  |               |               | 0.1% (0–0.1%)         | 0.3% (0.2–0.4%)          | 1% (0.9–1.2%)             |
|                                  | Percent (proportion)† |               |               | 4.1%                  | 23.4%                    | 72.5%                     |
| Bahrain                          | Number                |               |               | 19 (13–26)            | 139 (85–183)             | 210 (146–261)             |
|                                  | Percent (all-cause)*  |               |               | 0% (0–0.1%)           | 0.3% (0.2–0.3%)          | 1% (0.7–1.1%)             |
|                                  | Percent (proportion)† |               |               | 5.3%                  | 37.8%                    | 57.0%                     |
| Egypt                            | Number                |               |               | 1409 (962–2163)       | 15807 (11554–22181)      | 24760 (18719–37961)       |
|                                  | Percent (all-cause)*  |               |               | 0% (0–0.1%)           | 0.2% (0.2–0.3%)          | 0.8% (0.7–1.2%)           |
|                                  | Percent (proportion)† |               |               | 3.4%                  | 37.7%                    | 59.0%                     |
| Iran                             | Number                |               |               | 1363 (988–1531)       | 9909 (7613–10950)        | 29440 (25079–32598)       |
|                                  | Percent (all-cause)*  |               |               | 0% (0–0%)             | 0.3% (0.3–0.4%)          | 1.2% (1–1.3%)             |
|                                  | Percent (proportion)† |               |               | 3.3%                  | 24.3%                    | 72.3%                     |
| Iraq                             | Number                |               |               | 732 (516–1064)        | 3387 (2424–5523)         | 8782 (7148–12013)         |
|                                  | Percent (all-cause)*  |               |               | 0% (0–0%)             | 0.2% (0.2–0.3%)          | 1% (0.9–1.3%)             |
|                                  | Percent (proportion)† |               |               | 5.7%                  | 26.3%                    | 68.1%                     |
| Jordan                           | Number                |               |               | 114 (91–142)          | 736 (599–903)            | 2084 (1734–2480)          |
|                                  | Percent (all-cause)*  |               |               | 0% (0–0.1%)           | 0.3% (0.2–0.3%)          | 1.1% (0.9–1.3%)           |
|                                  | Percent (proportion)† |               |               | 3.9%                  | 25.1%                    | 71.0%                     |
| Kuwait                           | Number                |               |               | 41 (32–51)            | 209 (168–256)            | 570 (458–686)             |
|                                  | Percent (all-cause)*  |               |               | 0% (0–0%)             | 0.2% (0.2–0.3%)          | 1.1% (0.9–1.2%)           |
|                                  | Percent (proportion)† |               |               | 5.0%                  | 25.5%                    | 69.5%                     |
| Lebanon                          | Number                |               |               | 65 (45–91)            | 551 (402–763)            | 2477 (1968–3432)          |
|                                  | Percent (all-cause)*  |               |               | 0% (0–0.1%)           | 0.2% (0.2–0.3%)          | 0.9% (0.7–1.3%)           |
|                                  | Percent (proportion)† |               |               | 2.1%                  | 17.8%                    | 80.1%                     |
| Libya                            | Number                |               |               | 202 (138–284)         | 910 (619–1221)           | 2050 (1526–2694)          |
|                                  | Percent (all-cause)*  |               |               | 0.1% (0–0.1%)         | 0.3% (0.3–0.4%)          | 1.2% (0.9–1.5%)           |
|                                  | Percent (proportion)† |               |               | 6.4%                  | 28.8%                    | 64.8%                     |
| Morocco                          | Number                |               |               | 819 (530–1253)        | 7182 (5145–9142)         | 14309 (11654–16738)       |
|                                  | Percent (all-cause)*  |               |               | 0.1% (0–0.1%)         | 0.3% (0.3–0.4%)          | 1% (0.9–1.1%)             |
|                                  | Percent (proportion)† |               |               | 3.7%                  | 32.2%                    | 64.1%                     |
| Palestine                        | Number                |               |               | 42 (28–51)            | 380 (254–455)            | 975 (644–1136)            |
|                                  | Percent (all-cause)*  |               |               | 0% (0–0%)             | 0.3% (0.2–0.3%)          | 1% (0.7–1.1%)             |
|                                  | Percent (proportion)† |               |               | 3.0%                  | 27.2%                    | 69.8%                     |
| Oman                             | Number                |               |               | 31 (23–46)            | 197 (158–252)            | 671 (395–788)             |
|                                  | Percent (all-cause)*  |               |               | 0% (0–0%)             | 0.2% (0.2–0.2%)          | 1.1% (0.6–1.2%)           |
|                                  | Percent (proportion)† |               |               | 3.4%                  | 21.9%                    | 74.7%                     |
| Qatar                            | Number                |               |               | 39 (24–55)            | 157 (101–224)            | 181 (107–248)             |
|                                  | Percent (all-cause)*  |               |               | 0% (0–0.1%)           | 0.3% (0.3–0.4%)          | 1.3% (0.8–1.5%)           |
|                                  | Percent (proportion)† |               |               | 10.3%                 | 41.6%                    | 48.1%                     |
| Saudi Arabia                     | Number                |               |               | 1028 (742–1402)       | 3281 (2544–4021)         | 5349 (3694–6335)          |
|                                  | Percent (all-cause)*  |               |               | 0% (0–0%)             | 0.2% (0.2–0.3%)          | 1.3% (0.9–1.5%)           |
|                                  | Percent (proportion)† |               |               | 10.6%                 | 34.0%                    | 55.4%                     |
| Syrian Arab Republic             | Number                |               |               | 167 (116–235)         | 1769 (1178–2380)         | 4654 (2999–5949)          |
|                                  | Percent (all-cause)*  |               |               | 0% (0–0%)             | 0.2% (0.1–0.2%)          | 0.9% (0.6–1%)             |

**Table S20** Age-specific disability and death related to Parkinson's disease in North Africa and Middle East countries in 2019

|                      |                       | <b>Under 5</b> | <b>5-14 years</b> | <b>15-49 years</b> | <b>50-69 years</b> | <b>70+ years</b>    |
|----------------------|-----------------------|----------------|-------------------|--------------------|--------------------|---------------------|
|                      |                       | Mean (95% UI)  | Mean (95% UI)     | Mean (95% UI)      | Mean (95% UI)      | Mean (95% UI)       |
| Tunisia              | Percent (proportion)† |                |                   | 2.5%               | 26.8%              | 70.6%               |
|                      | Number                |                |                   | 170 (111–250)      | 1600 (1115–2272)   | 5177 (3843–6918)    |
|                      | Percent (all-cause)*  |                |                   | 0% (0–0.1%)        | 0.3% (0.2–0.4%)    | 1% (0.9–1.3%)       |
| Türkiye              | Percent (proportion)† |                |                   | 2.4%               | 23.0%              | 74.5%               |
|                      | Number                |                |                   | 1489 (1145–1914)   | 10555 (7850–19375) | 39843 (30188–74909) |
|                      | Percent (all-cause)*  |                |                   | 0.1% (0.1–0.1%)    | 0.3% (0.3–0.5%)    | 1.2% (1–2.2%)       |
| United Arab Emirates | Percent (proportion)† |                |                   | 2.9%               | 20.3%              | 76.8%               |
|                      | Number                |                |                   | 630 (401–930)      | 1341 (852–1860)    | 450 (279–598)       |
|                      | Percent (all-cause)*  |                |                   | 0.1% (0.1–0.1%)    | 0.4% (0.3–0.5%)    | 1.2% (0.8–1.6%)     |
| Yemen                | Percent (proportion)† |                |                   | 26.0%              | 55.4%              | 18.6%               |
|                      | Number                |                |                   | 468 (291–740)      | 2359 (1649–3423)   | 4287 (3381–5496)    |
|                      | Percent (all-cause)*  |                |                   | 0% (0–0%)          | 0.2% (0.2–0.3%)    | 0.7% (0.6–0.9%)     |
| Afghanistan          | Percent (proportion)† |                |                   | 6.6%               | 33.2%              | 60.3%               |
|                      | Number                |                |                   | 1359 (694–2050)    | 3669 (2478–5051)   | 5487 (4345–6838)    |
|                      | Percent (all-cause)*  |                |                   | 0% (0–0.1%)        | 0.2% (0.2–0.3%)    | 0.8% (0.6–0.9%)     |
| Sudan                | Percent (proportion)† |                |                   | 12.9%              | 34.9%              | 52.2%               |
|                      | Number                |                |                   | 650 (377–1017)     | 3447 (2347–4833)   | 7486 (5917–9368)    |
|                      | Percent (all-cause)*  |                |                   | 0% (0–0%)          | 0.3% (0.2–0.3%)    | 0.9% (0.7–1.1%)     |
|                      | Percent (proportion)† |                |                   | 5.6%               | 29.8%              | 64.6%               |

DALYs, Disability-Adjusted Life Years; NC, neurological condition; UI, uncertainty interval; YLDs, Years Lived with Disability; YLLs, Years of Life Lost. Count data are absolute numbers and percentage data are rounded to one decimal place. Percentages and number of DALYs, deaths, YLDs, and YLLs are not mutually exclusive: the sum of percentages and number of DALYs, deaths, YLDs, and YLLs in the columns exceeds the totals for all causes combined because of overlap between various causes. Measures with insufficient data are not reported here. \*Percent of all-cause indicates the proportion of the specified measure (ie, DALYs, deaths, YDLs, or YLLs) of Parkinson's disease out of all causes in the age-group in the region/nation. †Percent proportion indicates the share of the specified measure (ie, DALYs, deaths, YDLs, or YLLs) of Parkinson's disease in different age-groups in the region/nation. Data in parentheses are 95% uncertainty intervals.

***Table S21 Age-specific disability and death related to meningitis in North Africa and Middle East countries in 2019***

(NEXT PAGE)

**Table S21** Age-specific disability and death related to meningitis in North Africa and Middle East countries in 2019

|                                               |                       | <b>Under 5</b>             | <b>5-14 years</b>         | <b>15-49 years</b>        | <b>50-69 years</b>      | <b>70+ years</b>       |
|-----------------------------------------------|-----------------------|----------------------------|---------------------------|---------------------------|-------------------------|------------------------|
|                                               |                       | Mean (95% UI)              | Mean (95% UI)             | Mean (95% UI)             | Mean (95% UI)           | Mean (95% UI)          |
| <b>DALYs (Disability-Adjusted Life Years)</b> |                       |                            |                           |                           |                         |                        |
| Global                                        | Number                | 9876051 (7717983–12749796) | 1956141 (1644966–2278293) | 3210383 (2858065–3585633) | 945906 (860913–1040812) | 344717 (314336–375836) |
|                                               | Percent (all-cause)*  | 2.1% (1.8–2.5%)            | 1.7% (1.3–2%)             | 0.4% (0.4–0.5%)           | 0.1% (0.1–0.2%)         | 0.1% (0.1–0.1%)        |
|                                               | Percent (proportion)† | 60.5%                      | 12.0%                     | 19.7%                     | 5.8%                    | 2.1%                   |
| North Africa and Middle East                  | Number                | 205567 (155408–275119)     | 54450 (44616–66488)       | 107792 (89095–129809)     | 31468 (26721–36709)     | 13495 (11734–15401)    |
|                                               | Percent (all-cause)*  | 0.7% (0.6–0.9%)            | 0.6% (0.5–0.7%)           | 0.2% (0.1–0.2%)           | 0.1% (0.1–0.1%)         | 0.1% (0.1–0.1%)        |
|                                               | Percent (proportion)† | 49.8%                      | 13.2%                     | 26.1%                     | 7.6%                    | 3.3%                   |
| Algeria                                       | Number                | 5773 (3786–9006)           | 2131 (1637–2804)          | 5391 (4181–6755)          | 1834 (1352–2437)        | 1096 (827–1414)        |
|                                               | Percent (all-cause)*  | 0.3% (0.2–0.5%)            | 0.4% (0.3–0.6%)           | 0.1% (0.1–0.2%)           | 0.1% (0.1–0.1%)         | 0.1% (0–0.1%)          |
|                                               | Percent (proportion)† | 35.6%                      | 13.1%                     | 33.2%                     | 11.3%                   | 6.8%                   |
| Bahrain                                       | Number                | 33 (23–46)                 | 21 (17–27)                | 105 (85–128)              | 39 (31–48)              | 10 (8–13)              |
|                                               | Percent (all-cause)*  | 0.3% (0.3–0.4%)            | 0.2% (0.2–0.3%)           | 0.1% (0.1–0.1%)           | 0% (0–0%)               | 0% (0–0%)              |
|                                               | Percent (proportion)† | 15.8%                      | 10.3%                     | 50.5%                     | 18.5%                   | 5.0%                   |
| Egypt                                         | Number                | 22167 (11934–35778)        | 9025 (6089–13059)         | 18250 (12968–25640)       | 4296 (2929–6262)        | 890 (604–1358)         |
|                                               | Percent (all-cause)*  | 0.7% (0.4–1.1%)            | 0.5% (0.4–0.8%)           | 0.2% (0.2–0.3%)           | 0% (0–0.1%)             | 0% (0–0%)              |
|                                               | Percent (proportion)† | 40.6%                      | 16.5%                     | 33.4%                     | 7.9%                    | 1.6%                   |
| Iran                                          | Number                | 7317 (4969–9867)           | 3818 (3220–4507)          | 11800 (10264–13658)       | 4549 (4036–5165)        | 2609 (2284–2938)       |
|                                               | Percent (all-cause)*  | 0.5% (0.3–0.6%)            | 0.4% (0.3–0.5%)           | 0.1% (0.1–0.2%)           | 0.1% (0.1–0.1%)         | 0.1% (0.1–0.1%)        |
|                                               | Percent (proportion)† | 24.3%                      | 12.7%                     | 39.2%                     | 15.1%                   | 8.7%                   |
| Iraq                                          | Number                | 12701 (8425–19228)         | 4662 (3482–5996)          | 8106 (6057–11014)         | 2149 (1532–2836)        | 771 (584–979)          |
|                                               | Percent (all-cause)*  | 0.8% (0.6–1.1%)            | 0.6% (0.5–0.8%)           | 0.2% (0.1–0.2%)           | 0.1% (0.1–0.1%)         | 0.1% (0.1–0.1%)        |
|                                               | Percent (proportion)† | 44.7%                      | 16.4%                     | 28.6%                     | 7.6%                    | 2.7%                   |
| Jordan                                        | Number                | 2411 (1621–3659)           | 1096 (849–1395)           | 1721 (1374–2091)          | 505 (398–638)           | 195 (152–252)          |
|                                               | Percent (all-cause)*  | 0.7% (0.5–0.9%)            | 0.7% (0.5–0.9%)           | 0.2% (0.2–0.2%)           | 0.1% (0.1–0.1%)         | 0.1% (0.1–0.1%)        |
|                                               | Percent (proportion)† | 40.7%                      | 18.5%                     | 29.0%                     | 8.5%                    | 3.3%                   |
| Kuwait                                        | Number                | 213 (139–304)              | 72 (58–89)                | 328 (267–397)             | 105 (83–132)            | 32 (25–40)             |
|                                               | Percent (all-cause)*  | 0.4% (0.3–0.5%)            | 0.2% (0.2–0.3%)           | 0.1% (0.1–0.1%)           | 0.1% (0–0.1%)           | 0% (0–0%)              |
|                                               | Percent (proportion)† | 28.4%                      | 9.6%                      | 43.8%                     | 14.0%                   | 4.3%                   |
| Lebanon                                       | Number                | 354 (190–613)              | 148 (104–216)             | 578 (418–783)             | 241 (174–331)           | 206 (148–287)          |
|                                               | Percent (all-cause)*  | 0.3% (0.2–0.5%)            | 0.3% (0.2–0.4%)           | 0.1% (0.1–0.2%)           | 0.1% (0–0.1%)           | 0.1% (0–0.1%)          |
|                                               | Percent (proportion)† | 23.2%                      | 9.7%                      | 37.9%                     | 15.8%                   | 13.5%                  |
| Libya                                         | Number                | 405 (259–611)              | 204 (152–266)             | 1064 (801–1365)           | 346 (240–467)           | 160 (113–216)          |
|                                               | Percent (all-cause)*  | 0.4% (0.3–0.5%)            | 0.3% (0.2–0.4%)           | 0.1% (0.1–0.2%)           | 0.1% (0.1–0.1%)         | 0.1% (0–0.1%)          |
|                                               | Percent (proportion)† | 18.6%                      | 9.4%                      | 48.8%                     | 15.9%                   | 7.3%                   |
| Morocco                                       | Number                | 9710 (4700–17324)          | 2150 (1495–2904)          | 5671 (3955–8096)          | 3127 (2154–4175)        | 1421 (1005–1885)       |
|                                               | Percent (all-cause)*  | 0.9% (0.5–1.4%)            | 0.5% (0.3–0.7%)           | 0.2% (0.1–0.2%)           | 0.1% (0.1–0.1%)         | 0.1% (0.1–0.1%)        |
|                                               | Percent (proportion)† | 44.0%                      | 9.7%                      | 25.7%                     | 14.2%                   | 6.4%                   |
| Palestine                                     | Number                | 934 (636–1341)             | 335 (267–414)             | 518 (428–624)             | 127 (105–154)           | 81 (65–99)             |
|                                               | Percent (all-cause)*  | 0.6% (0.5–0.8%)            | 0.4% (0.3–0.5%)           | 0.1% (0.1–0.2%)           | 0.1% (0–0.1%)           | 0.1% (0.1–0.1%)        |
|                                               | Percent (proportion)† | 46.8%                      | 16.8%                     | 26.0%                     | 6.3%                    | 4.1%                   |
| Oman                                          | Number                | 251 (164–396)              | 71 (57–90)                | 250 (209–302)             | 77 (60–96)              | 59 (44–76)             |
|                                               | Percent (all-cause)*  | 0.3% (0.2–0.4%)            | 0.2% (0.1–0.2%)           | 0.1% (0–0.1%)             | 0% (0–0.1%)             | 0.1% (0.1–0.1%)        |
|                                               | Percent (proportion)† | 35.4%                      | 10.1%                     | 35.4%                     | 10.8%                   | 8.3%                   |
| Qatar                                         | Number                | 92 (62–133)                | 43 (32–58)                | 324 (242–419)             | 44 (32–60)              | 12 (9–17)              |
|                                               | Percent (all-cause)*  | 0.4% (0.3–0.5%)            | 0.3% (0.2–0.4%)           | 0.1% (0.1–0.1%)           | 0% (0–0.1%)             | 0.1% (0–0.1%)          |
|                                               | Percent (proportion)† | 17.9%                      | 8.3%                      | 62.8%                     | 8.6%                    | 2.4%                   |
| Saudi Arabia                                  | Number                | 377 (238–562)              | 398 (308–520)             | 5897 (4376–8124)          | 1364 (994–1823)         | 455 (345–588)          |
|                                               | Percent (all-cause)*  | 0.1% (0.1–0.2%)            | 0.2% (0.1–0.2%)           | 0.1% (0.1–0.1%)           | 0.1% (0.1–0.1%)         | 0.1% (0.1–0.1%)        |
|                                               | Percent (proportion)† | 4.4%                       | 4.7%                      | 69.5%                     | 16.1%                   | 5.4%                   |
| Syrian Arab Republic                          | Number                | 4326 (2678–6519)           | 3554 (2762–4483)          | 3817 (2864–4970)          | 1248 (921–1661)         | 524 (398–662)          |
|                                               | Percent (all-cause)*  | 1.3% (0.9–1.8%)            | 1.3% (1–1.7%)             | 0.3% (0.2–0.4%)           | 0.1% (0.1–0.1%)         | 0.1% (0.1–0.1%)        |
|                                               | Percent (proportion)† | 32.1%                      | 26.4%                     | 28.3%                     | 9.3%                    | 3.9%                   |

**Table S21** Age-specific disability and death related to meningitis in North Africa and Middle East countries in 2019

|                              |                       | <b>Under 5</b>        | <b>5-14 years</b>   | <b>15-49 years</b>  | <b>50-69 years</b>  | <b>70+ years</b>    |
|------------------------------|-----------------------|-----------------------|---------------------|---------------------|---------------------|---------------------|
|                              |                       | Mean (95% UI)         | Mean (95% UI)       | Mean (95% UI)       | Mean (95% UI)       | Mean (95% UI)       |
| Tunisia                      | Number                | 1108 (670–1619)       | 428 (309–601)       | 1348 (976–1783)     | 711 (515–992)       | 461 (329–650)       |
|                              | Percent (all-cause)*  | 0·6% (0·4–0·8%)       | 0·4% (0·3–0·6%)     | 0·1% (0·1–0·2%)     | 0·1% (0·1–0·1%)     | 0·1% (0·1–0·1%)     |
|                              | Percent (proportion)† | 27·3%                 | 10·6%               | 33·2%               | 17·5%               | 11·4%               |
| Türkiye                      | Number                | 5982 (4202–8380)      | 2046 (1582–2663)    | 5292 (4193–6602)    | 2499 (1885–3196)    | 1399 (1076–1789)    |
|                              | Percent (all-cause)*  | 0·4% (0·3–0·5%)       | 0·3% (0·2–0·4%)     | 0·1% (0·1–0·1%)     | 0% (0–0%)           | 0% (0–0%)           |
|                              | Percent (proportion)† | 34·7%                 | 11·9%               | 30·7%               | 14·5%               | 8·1%                |
| United Arab Emirates         | Number                | 114 (67–234)          | 131 (87–205)        | 2139 (1352–3161)    | 421 (227–656)       | 29 (15–44)          |
|                              | Percent (all-cause)*  | 0·3% (0·2–0·6%)       | 0·3% (0·2–0·4%)     | 0·1% (0·1–0·2%)     | 0·1% (0–0·1%)       | 0·1% (0–0·1%)       |
|                              | Percent (proportion)† | 4·0%                  | 4·6%                | 75·5%               | 14·9%               | 1·0%                |
| Yemen                        | Number                | 17482 (9540–31588)    | 5710 (3429–8552)    | 7204 (4511–10147)   | 1928 (1252–2766)    | 786 (513–1063)      |
|                              | Percent (all-cause)*  | 0·4% (0·2–0·7%)       | 0·6% (0·3–0·8%)     | 0·2% (0·1–0·2%)     | 0·1% (0·1–0·2%)     | 0·1% (0·1–0·1%)     |
|                              | Percent (proportion)† | 52·8%                 | 17·2%               | 21·8%               | 5·8%                | 2·4%                |
| Afghanistan                  | Number                | 84270 (54835–132122)  | 12106 (7019–18668)  | 19729 (11218–29830) | 3856 (2314–5691)    | 1319 (821–1831)     |
|                              | Percent (all-cause)*  | 1·1% (0·8–1·7%)       | 0·9% (0·5–1·4%)     | 0·4% (0·2–0·5%)     | 0·2% (0·1–0·3%)     | 0·2% (0·1–0·2%)     |
|                              | Percent (proportion)† | 69·5%                 | 10·0%               | 16·3%               | 3·2%                | 1·1%                |
| Sudan                        | Number                | 29339 (14574–54555)   | 6245 (3752–9928)    | 8150 (4816–12413)   | 1971 (1204–2884)    | 966 (634–1355)      |
|                              | Percent (all-cause)*  | 0·6% (0·4–1%)         | 0·7% (0·4–1%)       | 0·2% (0·1–0·3%)     | 0·1% (0·1–0·1%)     | 0·1% (0·1–0·1%)     |
|                              | Percent (proportion)† | 62·9%                 | 13·4%               | 17·5%               | 4·2%                | 2·1%                |
| <b>Deaths</b>                |                       |                       |                     |                     |                     |                     |
| Global                       | Number                | 112205 (87353–145091) | 22543 (18755–26540) | 49895 (44171–56266) | 28641 (26004–31744) | 22938 (20618–25102) |
|                              | Percent (all-cause)*  | 2·2% (1·9–2·6%)       | 3·3% (2·9–3·8%)     | 0·7% (0·6–0·7%)     | 0·2% (0·2–0·2%)     | 0·1% (0·1–0·1%)     |
|                              | Percent (proportion)† | 47·5%                 | 9·5%                | 21·1%               | 12·1%               | 9·7%                |
| North Africa and Middle East | Number                | 2314 (1739–3104)      | 589 (470–734)       | 1574 (1242–1942)    | 896 (749–1064)      | 903 (776–1029)      |
|                              | Percent (all-cause)*  | 0·8% (0·6–1%)         | 1·2% (1–1·4%)       | 0·3% (0·3–0·3%)     | 0·1% (0·1–0·1%)     | 0·1% (0·1–0·1%)     |
|                              | Percent (proportion)† | 36·9%                 | 9·4%                | 25·1%               | 14·3%               | 14·4%               |
| Algeria                      | Number                | 64 (41–101)           | 22 (16–30)          | 76 (55–101)         | 51 (35–71)          | 79 (59–103)         |
|                              | Percent (all-cause)*  | 0·4% (0·2–0·6%)       | 0·9% (0·6–1·1%)     | 0·3% (0·2–0·3%)     | 0·1% (0·1–0·1%)     | 0·1% (0·1–0·1%)     |
|                              | Percent (proportion)† | 22·0%                 | 7·4%                | 26·1%               | 17·3%               | 27·2%               |
| Bahrain                      | Number                | 0 (0–1)               | <0·1 (<0·1–<0·1)    | 1 (1–2)             | 1 (1–1)             | 1 (1–1)             |
|                              | Percent (all-cause)*  | 0·4% (0·3–0·5%)       | 0·6% (0·5–0·7%)     | 0·1% (0·1–0·2%)     | 0·1% (0–0·1%)       | 0% (0–0%)           |
|                              | Percent (proportion)† | 10·7%                 | 5·8%                | 37·4%               | 26·6%               | 19·5%               |
| Egypt                        | Number                | 246 (129–401)         | 95 (59–147)         | 256 (169–384)       | 118 (75–180)        | 49 (31–78)          |
|                              | Percent (all-cause)*  | 0·8% (0·4–1·2%)       | 1·1% (0·7–1·7%)     | 0·3% (0·2–0·5%)     | 0·1% (0–0·1%)       | 0% (0–0%)           |
|                              | Percent (proportion)† | 32·2%                 | 12·4%               | 33·5%               | 15·4%               | 6·4%                |
| Iran                         | Number                | 80 (54–110)           | 37 (31–44)          | 151 (137–172)       | 121 (109–137)       | 188 (161–214)       |
|                              | Percent (all-cause)*  | 0·5% (0·4–0·7%)       | 0·8% (0·7–1%)       | 0·3% (0·2–0·3%)     | 0·1% (0·1–0·1%)     | 0·1% (0·1–0·1%)     |
|                              | Percent (proportion)† | 13·9%                 | 6·3%                | 26·2%               | 21·0%               | 32·6%               |
| Iraq                         | Number                | 143 (93–218)          | 51 (37–67)          | 120 (83–172)        | 64 (44–86)          | 49 (38–62)          |
|                              | Percent (all-cause)*  | 1% (0·7–1·3%)         | 1·4% (1·1–1·7%)     | 0·3% (0·3–0·4%)     | 0·1% (0·1–0·1%)     | 0·1% (0·1–0·1%)     |
|                              | Percent (proportion)† | 33·4%                 | 12·0%               | 28·0%               | 15·0%               | 11·6%               |
| Jordan                       | Number                | 27 (18–41)            | 11 (8–15)           | 20 (16–26)          | 13 (9–17)           | 12 (9–15)           |
|                              | Percent (all-cause)*  | 0·7% (0·6–1%)         | 1·6% (1·2–2%)       | 0·4% (0·4–0·5%)     | 0·1% (0·1–0·2%)     | 0·1% (0·1–0·1%)     |
|                              | Percent (proportion)† | 32·4%                 | 13·4%               | 24·6%               | 15·3%               | 14·3%               |
| Kuwait                       | Number                | 2 (2–3)               | 1 (0–1)             | 4 (3–5)             | 3 (2–3)             | 2 (2–3)             |
|                              | Percent (all-cause)*  | 0·4% (0·3–0·6%)       | 0·6% (0·4–0·7%)     | 0·2% (0·2–0·2%)     | 0·1% (0·1–0·1%)     | 0·1% (0–0·1%)       |
|                              | Percent (proportion)† | 19·1%                 | 5·3%                | 34·0%               | 21·6%               | 20·0%               |
| Lebanon                      | Number                | 4 (2–7)               | 1 (1–2)             | 8 (5–11)            | 7 (4–10)            | 14 (10–20)          |
|                              | Percent (all-cause)*  | 0·4% (0·2–0·6%)       | 0·7% (0·5–1·2%)     | 0·2% (0·2–0·3%)     | 0·1% (0·1–0·1%)     | 0·1% (0–0·1%)       |
|                              | Percent (proportion)† | 11·3%                 | 3·6%                | 22·3%               | 19·8%               | 42·9%               |
| Libya                        | Number                | 5 (3–7)               | 2 (1–3)             | 16 (11–22)          | 10 (6–14)           | 11 (8–15)           |
|                              | Percent (all-cause)*  | 0·4% (0·3–0·6%)       | 0·5% (0·4–0·7%)     | 0·2% (0·2–0·3%)     | 0·1% (0·1–0·1%)     | 0·1% (0·1–0·1%)     |
|                              | Percent (proportion)† | 10·4%                 | 4·4%                | 36·8%               | 22·7%               | 25·7%               |

**Table S21** Age-specific disability and death related to meningitis in North Africa and Middle East countries in 2019

|                                           |                       | <b>Under 5</b>      | <b>5-14 years</b>      | <b>15-49 years</b>     | <b>50-69 years</b>   | <b>70+ years</b>    |
|-------------------------------------------|-----------------------|---------------------|------------------------|------------------------|----------------------|---------------------|
|                                           |                       | Mean (95% UI)       | Mean (95% UI)          | Mean (95% UI)          | Mean (95% UI)        | Mean (95% UI)       |
| Morocco                                   | Number                | 109 (52–195)        | 21 (13–30)             | 80 (47–126)            | 93 (61–130)          | 97 (69–128)         |
|                                           | Percent (all-cause)*  | 1% (0.5–1.5%)       | 1.1% (0.7–1.5%)        | 0.3% (0.2–0.4%)        | 0.1% (0.1–0.2%)      | 0.1% (0.1–0.1%)     |
|                                           | Percent (proportion)† | 27.1%               | 5.3%                   | 20.0%                  | 23.3%                | 24.3%               |
| Palestine                                 | Number                | 10 (7–15)           | 3 (2–4)                | 5 (4–6)                | 3 (2–4)              | 6 (5–7)             |
|                                           | Percent (all-cause)*  | 0.7% (0.5–0.9%)     | 1% (0.8–1.2%)          | 0.2% (0.2–0.3%)        | 0.1% (0.1–0.1%)      | 0.1% (0.1–0.1%)     |
|                                           | Percent (proportion)† | 37.0%               | 10.8%                  | 19.2%                  | 11.1%                | 21.9%               |
| Oman                                      | Number                | 3 (2–4)             | 1 (1–1)                | 4 (3–4)                | 3 (2–3)              | 4 (3–5)             |
|                                           | Percent (all-cause)*  | 0.3% (0.2–0.5%)     | 0.4% (0.3–0.5%)        | 0.1% (0.1–0.1%)        | 0.1% (0.1–0.1%)      | 0.1% (0.1–0.1%)     |
|                                           | Percent (proportion)† | 20.3%               | 5.6%                   | 25.9%                  | 18.3%                | 30.0%               |
| Qatar                                     | Number                | 1 (1–1)             | <0.1 (<0.1–<0.1)       | 3 (2–4)                | 1 (0–1)              | 1 (0–1)             |
|                                           | Percent (all-cause)*  | 0.5% (0.3–0.6%)     | 0.5% (0.4–0.7%)        | 0.2% (0.1–0.2%)        | 0% (0–0.1%)          | 0.1% (0.1–0.1%)     |
|                                           | Percent (proportion)† | 19.0%               | 5.6%                   | 50.5%                  | 11.5%                | 13.3%               |
| Saudi Arabia                              | Number                | 4 (2–6)             | 3 (2–5)                | 99 (69–142)            | 41 (29–56)           | 33 (25–42)          |
|                                           | Percent (all-cause)*  | 0.1% (0.1–0.2%)     | 0.4% (0.3–0.6%)        | 0.2% (0.2–0.2%)        | 0.1% (0.1–0.1%)      | 0.1% (0.1–0.1%)     |
|                                           | Percent (proportion)† | 2.1%                | 1.8%                   | 55.2%                  | 22.7%                | 18.3%               |
| Syrian Arab Republic                      | Number                | 49 (30–74)          | 42 (32–53)             | 53 (38–73)             | 35 (24–49)           | 35 (26–44)          |
|                                           | Percent (all-cause)*  | 1.5% (1.2–1.1%)     | 3.2% (2.6–4%)          | 0.5% (0.4–0.6%)        | 0.1% (0.1–0.1%)      | 0.1% (0.1–0.1%)     |
|                                           | Percent (proportion)† | 23.0%               | 19.6%                  | 24.9%                  | 16.4%                | 16.1%               |
| Tunisia                                   | Number                | 12 (7–18)           | 4 (3–6)                | 17 (12–25)             | 19 (13–28)           | 32 (22–46)          |
|                                           | Percent (all-cause)*  | 0.6% (0.4–0.9%)     | 0.9% (0.6–1.4%)        | 0.3% (0.2–0.4%)        | 0.1% (0.1–0.1%)      | 0.1% (0.1–0.1%)     |
|                                           | Percent (proportion)† | 14.5%               | 4.7%                   | 20.6%                  | 22.7%                | 37.5%               |
| Türkiye                                   | Number                | 68 (48–96)          | 24 (18–31)             | 85 (65–108)            | 77 (56–101)          | 97 (74–124)         |
|                                           | Percent (all-cause)*  | 0.5% (0.3–0.6%)     | 1% (0.7–1.3%)          | 0.2% (0.2–0.3%)        | 0.1% (0.1–0.1%)      | 0% (0–0%)           |
|                                           | Percent (proportion)† | 19.5%               | 6.8%                   | 24.2%                  | 21.9%                | 27.7%               |
| United Arab Emirates                      | Number                | 1 (1–3)             | 1 (1–2)                | 38 (22–59)             | 12 (6–19)            | 2 (1–3)             |
|                                           | Percent (all-cause)*  | 0.4% (0.3–0.9%)     | 0.8% (0.5–1.4%)        | 0.3% (0.2–0.4%)        | 0.1% (0.1–0.2%)      | 0.1% (0–0.1%)       |
|                                           | Percent (proportion)† | 2.3%                | 2.4%                   | 69.9%                  | 22.2%                | 3.2%                |
| Yemen                                     | Number                | 196 (106–358)       | 63 (34–98)             | 110 (62–163)           | 59 (37–86)           | 50 (31–67)          |
|                                           | Percent (all-cause)*  | 0.4% (0.3–0.8%)     | 0.9% (0.5–1.3%)        | 0.3% (0.2–0.4%)        | 0.2% (0.1–0.2%)      | 0.1% (0.1–0.2%)     |
|                                           | Percent (proportion)† | 41.0%               | 13.1%                  | 23.0%                  | 12.3%                | 10.5%               |
| Afghanistan                               | Number                | 953 (618–1498)      | 134 (69–217)           | 298 (145–482)          | 105 (57–161)         | 73 (38–110)         |
|                                           | Percent (all-cause)*  | 1.2% (0.8–1.7%)     | 1.5% (0.8–2.3%)        | 0.5% (0.3–0.7%)        | 0.2% (0.1–0.3%)      | 0.1% (0.1–0.2%)     |
|                                           | Percent (proportion)† | 61.0%               | 8.6%                   | 19.1%                  | 6.7%                 | 4.6%                |
| Sudan                                     | Number                | 333 (164–621)       | 73 (42–118)            | 128 (71–202)           | 61 (36–92)           | 67 (44–93)          |
|                                           | Percent (all-cause)*  | 0.7% (0.4–1.1%)     | 1.3% (0.8–1.9%)        | 0.4% (0.2–0.5%)        | 0.1% (0.1–0.2%)      | 0.1% (0.1–0.1%)     |
|                                           | Percent (proportion)† | 50.4%               | 11.0%                  | 19.4%                  | 9.2%                 | 10.1%               |
| <b>YLDs (Years Lived with Disability)</b> |                       |                     |                        |                        |                      |                     |
| Global                                    | Number                | 66379 (44732–90801) | 162180 (112835–227958) | 354785 (250355–478152) | 77640 (55841–103018) | 22349 (15359–29915) |
|                                           | Percent (all-cause)*  | 0.2% (0.2–0.3%)     | 0.3% (0.2–0.3%)        | 0.1% (0.1–0.1%)        | 0% (0–0%)            | 0% (0–0%)           |
|                                           | Percent (proportion)† | 9.7%                | 23.7%                  | 51.9%                  | 11.4%                | 3.3%                |
| North Africa and Middle East              | Number                | 2622 (1783–3638)    | 7626 (5210–10604)      | 20273 (13979–27251)    | 4320 (3020–5728)     | 1390 (957–1860)     |
|                                           | Percent (all-cause)*  | 0.1% (0.1–0.1%)     | 0.1% (0.1–0.2%)        | 0.1% (0–0.1%)          | 0% (0–0%)            | 0% (0–0%)           |
|                                           | Percent (proportion)† | 7.2%                | 21.0%                  | 56.0%                  | 11.9%                | 3.8%                |
| Algeria                                   | Number                | 152 (103–215)       | 412 (276–577)          | 1236 (842–1668)        | 325 (226–433)        | 104 (70–142)        |
|                                           | Percent (all-cause)*  | 0.1% (0.1–0.1%)     | 0.1% (0.1–0.2%)        | 0.1% (0–0.1%)          | 0% (0–0%)            | 0% (0–0%)           |
|                                           | Percent (proportion)† | 6.8%                | 18.5%                  | 55.5%                  | 14.6%                | 4.7%                |
| Bahrain                                   | Number                | 2 (1–2)             | 6 (4–9)                | 38 (26–53)             | 11 (8–15)            | 1 (1–1)             |
|                                           | Percent (all-cause)*  | 0.1% (0.1–0.1%)     | 0.1% (0.1–0.1%)        | 0% (0–0%)              | 0% (0–0%)            | 0% (0–0%)           |
|                                           | Percent (proportion)† | 2.7%                | 10.6%                  | 65.5%                  | 19.5%                | 1.7%                |
| Egypt                                     | Number                | 484 (320–669)       | 1517 (1015–2138)       | 3523 (2388–4822)       | 667 (463–900)        | 143 (92–202)        |
|                                           | Percent (all-cause)*  | 0.1% (0.1–0.2%)     | 0.2% (0.1–0.2%)        | 0.1% (0.1–0.1%)        | 0% (0–0%)            | 0% (0–0%)           |
|                                           | Percent (proportion)† | 7.6%                | 23.9%                  | 55.6%                  | 10.5%                | 2.3%                |



**Table S21** Age-specific disability and death related to meningitis in North Africa and Middle East countries in 2019

|                      |                       | <b>Under 5</b>  | <b>5-14 years</b> | <b>15-49 years</b> | <b>50-69 years</b> | <b>70+ years</b> |
|----------------------|-----------------------|-----------------|-------------------|--------------------|--------------------|------------------|
|                      |                       | Mean (95% UI)   | Mean (95% UI)     | Mean (95% UI)      | Mean (95% UI)      | Mean (95% UI)    |
| Iran                 | Number                | 275 (185–385)   | 917 (616–1282)    | 3475 (2391–4641)   | 968 (675–1280)     | 282 (191–381)    |
|                      | Percent (all-cause)*  | 0·1% (0·1–0·2%) | 0·2% (0·1–0·2%)   | 0·1% (0·1–0·1%)    | 0% (0–0%)          | 0% (0–0%)        |
|                      | Percent (proportion)† | 4·7%            | 15·5%             | 58·7%              | 16·4%              | 4·8%             |
| Iraq                 | Number                | 209 (137–292)   | 579 (388–802)     | 1395 (954–1887)    | 214 (151–289)      | 62 (42–87)       |
|                      | Percent (all-cause)*  | 0·1% (0·1–0·2%) | 0·1% (0·1–0·2%)   | 0·1% (0–0·1%)      | 0% (0–0%)          | 0% (0–0%)        |
|                      | Percent (proportion)† | 8·5%            | 23·5%             | 56·7%              | 8·7%               | 2·5%             |
| Jordan               | Number                | 62 (40–87)      | 215 (125–330)     | 574 (381–830)      | 119 (78–169)       | 26 (18–36)       |
|                      | Percent (all-cause)*  | 0·2% (0·1–0·2%) | 0·2% (0·1–0·3%)   | 0·1% (0·1–0·1%)    | 0·1% (0–0·1%)      | 0% (0–0%)        |
|                      | Percent (proportion)† | 6·2%            | 21·6%             | 57·6%              | 11·9%              | 2·7%             |
| Kuwait               | Number                | 7 (5–10)        | 20 (14–28)        | 107 (74–145)       | 22 (15–29)         | 4 (3–6)          |
|                      | Percent (all-cause)*  | 0·1% (0·1–0·1%) | 0·1% (0·1–0·1%)   | 0% (0–0%)          | 0% (0–0%)          | 0% (0–0%)        |
|                      | Percent (proportion)† | 4·3%            | 12·3%             | 67·1%              | 13·5%              | 2·7%             |
| Lebanon              | Number                | 17 (11–24)      | 51 (34–72)        | 163 (112–224)      | 45 (31–61)         | 21 (14–28)       |
|                      | Percent (all-cause)*  | 0·1% (0·1–0·1%) | 0·1% (0·1–0·2%)   | 0·1% (0–0·1%)      | 0% (0–0%)          | 0% (0–0%)        |
|                      | Percent (proportion)† | 5·8%            | 17·2%             | 54·9%              | 15·2%              | 7·0%             |
| Libya                | Number                | 13 (9–19)       | 54 (36–75)        | 214 (145–287)      | 46 (31–61)         | 16 (11–22)       |
|                      | Percent (all-cause)*  | 0·1% (0·1–0·1%) | 0·1% (0·1–0·1%)   | 0% (0–0·1%)        | 0% (0–0%)          | 0% (0–0%)        |
|                      | Percent (proportion)† | 3·8%            | 15·7%             | 62·5%              | 13·3%              | 4·7%             |
| Morocco              | Number                | 153 (102–217)   | 474 (309–691)     | 1354 (886–1873)    | 355 (245–484)      | 107 (70–147)     |
|                      | Percent (all-cause)*  | 0·1% (0·1–0·2%) | 0·2% (0·1–0·2%)   | 0·1% (0·1–0·1%)    | 0% (0–0%)          | 0% (0–0%)        |
|                      | Percent (proportion)† | 6·3%            | 19·4%             | 55·4%              | 14·5%              | 4·4%             |
| Palestine            | Number                | 28 (18–39)      | 95 (63–134)       | 206 (140–287)      | 36 (24–49)         | 8 (5–11)         |
|                      | Percent (all-cause)*  | 0·1% (0·1–0·2%) | 0·2% (0·1–0·2%)   | 0·1% (0·1–0·1%)    | 0% (0–0·1%)        | 0% (0–0%)        |
|                      | Percent (proportion)† | 7·5%            | 25·4%             | 55·5%              | 9·6%               | 2·1%             |
| Oman                 | Number                | 5 (3–7)         | 10 (7–15)         | 50 (33–70)         | 6 (4–8)            | 1 (1–2)          |
|                      | Percent (all-cause)*  | 0% (0–0%)       | 0% (0–0%)         | 0% (0–0%)          | 0% (0–0%)          | 0% (0–0%)        |
|                      | Percent (proportion)† | 6·5%            | 14·6%             | 69·6%              | 7·8%               | 1·6%             |
| Qatar                | Number                | 6 (4–8)         | 20 (12–31)        | 182 (115–263)      | 26 (16–38)         | 1 (1–2)          |
|                      | Percent (all-cause)*  | 0·2% (0·1–0·2%) | 0·2% (0·1–0·3%)   | 0·1% (0·1–0·1%)    | 0·1% (0–0·1%)      | 0% (0–0%)        |
|                      | Percent (proportion)† | 2·5%            | 8·4%              | 77·5%              | 10·9%              | 0·6%             |
| Saudi Arabia         | Number                | 41 (27–59)      | 145 (97–200)      | 734 (508–997)      | 99 (68–134)        | 20 (13–28)       |
|                      | Percent (all-cause)*  | 0·1% (0–0·1%)   | 0·1% (0·1–0·1%)   | 0% (0–0%)          | 0% (0–0%)          | 0% (0–0%)        |
|                      | Percent (proportion)† | 4·0%            | 13·9%             | 70·7%              | 9·5%               | 1·9%             |
| Syrian Arab Republic | Number                | 58 (38–82)      | 247 (166–345)     | 645 (424–875)      | 197 (135–264)      | 48 (32–66)       |
|                      | Percent (all-cause)*  | 0·1% (0·1–0·2%) | 0·1% (0·1–0·2%)   | 0·1% (0·1–0·1%)    | 0% (0–0·1%)        | 0% (0–0%)        |
|                      | Percent (proportion)† | 4·9%            | 20·7%             | 54·0%              | 16·5%              | 4·0%             |
| Tunisia              | Number                | 33 (23–47)      | 115 (78–162)      | 415 (283–583)      | 150 (101–211)      | 52 (34–71)       |
|                      | Percent (all-cause)*  | 0·1% (0·1–0·2%) | 0·2% (0·1–0·2%)   | 0·1% (0·1–0·1%)    | 0% (0–0%)          | 0% (0–0%)        |
|                      | Percent (proportion)† | 4·4%            | 15·1%             | 54·2%              | 19·6%              | 6·7%             |
| Türkiye              | Number                | 43 (28–62)      | 156 (102–223)     | 696 (462–969)      | 234 (161–319)      | 106 (70–148)     |
|                      | Percent (all-cause)*  | 0% (0–0%)       | 0% (0–0%)         | 0% (0–0%)          | 0% (0–0%)          | 0% (0–0%)        |
|                      | Percent (proportion)† | 3·5%            | 12·6%             | 56·4%              | 18·9%              | 8·6%             |
| United Arab Emirates | Number                | 8 (5–11)        | 29 (19–40)        | 229 (157–315)      | 34 (23–46)         | 3 (2–4)          |
|                      | Percent (all-cause)*  | 0·1% (0·1–0·1%) | 0·1% (0·1–0·1%)   | 0% (0–0%)          | 0% (0–0%)          | 0% (0–0%)        |
|                      | Percent (proportion)† | 2·5%            | 9·5%              | 75·9%              | 11·1%              | 0·9%             |
| Yemen                | Number                | 251 (166–353)   | 690 (458–977)     | 1138 (785–1554)    | 153 (107–206)      | 63 (42–87)       |
|                      | Percent (all-cause)*  | 0·1% (0·1–0·1%) | 0·1% (0·1–0·2%)   | 0·1% (0·1–0·1%)    | 0% (0–0%)          | 0% (0–0·1%)      |
|                      | Percent (proportion)† | 11·0%           | 30·1%             | 49·6%              | 6·6%               | 2·7%             |
| Afghanistan          | Number                | 589 (400–826)   | 1416 (964–1953)   | 3043 (2127–4095)   | 493 (345–660)      | 270 (186–362)    |
|                      | Percent (all-cause)*  | 0·2% (0·1–0·3%) | 0·2% (0·2–0·3%)   | 0·1% (0·1–0·2%)    | 0·1% (0·1–0·1%)    | 0·2% (0·1–0·2%)  |
|                      | Percent (proportion)† | 10·1%           | 24·4%             | 52·4%              | 8·5%               | 4·6%             |
| Sudan                | Number                | 183 (122–258)   | 453 (306–649)     | 834 (575–1149)     | 118 (83–160)       | 51 (34–70)       |
|                      | Percent (all-cause)*  | 0·1% (0–0·1%)   | 0·1% (0·1–0·1%)   | 0% (0–0%)          | 0% (0–0%)          | 0% (0–0%)        |

**Table S21** Age-specific disability and death related to meningitis in North Africa and Middle East countries in 2019

|                                  |                       | <b>Under 5</b>             | <b>5-14 years</b>         | <b>15-49 years</b>        | <b>50-69 years</b>     | <b>70+ years</b>       |
|----------------------------------|-----------------------|----------------------------|---------------------------|---------------------------|------------------------|------------------------|
|                                  |                       | Mean (95% UI)              | Mean (95% UI)             | Mean (95% UI)             | Mean (95% UI)          | Mean (95% UI)          |
| Percent (proportion)†            |                       | 11.2%                      | 27.7%                     | 50.9%                     | 7.2%                   | 3.1%                   |
| <b>YLLs (Years of Life Lost)</b> |                       |                            |                           |                           |                        |                        |
| Global                           | Number                | 9809672 (7635431–12681594) | 1793961 (1490950–2112825) | 2855598 (2524348–3219199) | 868267 (788914–961398) | 322368 (292983–352467) |
|                                  | Percent (all-cause)*  | 2.2% (1.9–2.6%)            | 3.3% (2.9–3.8%)           | 0.7% (0.7–0.8%)           | 0.2% (0.2–0.2%)        | 0.1% (0.1–0.1%)        |
|                                  | Percent (proportion)† | 62.7%                      | 11.5%                     | 18.2%                     | 5.5%                   | 2.1%                   |
| North Africa and Middle East     | Number                | 202945 (152473–272531)     | 46824 (37348–58380)       | 87519 (68703–108580)      | 27147 (22591–32276)    | 12105 (10423–13885)    |
|                                  | Percent (all-cause)*  | 0.8% (0.6–1%)              | 1.2% (1–1.4%)             | 0.3% (0.3–0.4%)           | 0.1% (0.1–0.1%)        | 0.1% (0.1–0.1%)        |
|                                  | Percent (proportion)† | 53.9%                      | 12.4%                     | 23.2%                     | 7.2%                   | 3.2%                   |
| Algeria                          | Number                | 5620 (3624–8851)           | 1719 (1229–2357)          | 4154 (2980–5510)          | 1508 (1053–2104)       | 992 (727–1309)         |
|                                  | Percent (all-cause)*  | 0.4% (0.2–0.6%)            | 0.9% (0.6–1.2%)           | 0.3% (0.2–0.3%)           | 0.1% (0.1–0.1%)        | 0.1% (0.1–0.1%)        |
|                                  | Percent (proportion)† | 40.2%                      | 12.3%                     | 29.7%                     | 10.8%                  | 7.1%                   |
| Bahrain                          | Number                | 31 (22–44)                 | 15 (12–20)                | 67 (51–85)                | 27 (21–36)             | 9 (7–12)               |
|                                  | Percent (all-cause)*  | 0.4% (0.3–0.5%)            | 0.6% (0.5–0.7%)           | 0.2% (0.1–0.2%)           | 0.1% (0–0.1%)          | 0% (0–0.1%)            |
|                                  | Percent (proportion)† | 20.8%                      | 10.2%                     | 44.6%                     | 18.1%                  | 6.3%                   |
| Egypt                            | Number                | 21683 (11411–35293)        | 7508 (4636–11555)         | 14726 (9716–21916)        | 3629 (2312–5519)       | 747 (462–1212)         |
|                                  | Percent (all-cause)*  | 0.8% (0.4–1.2%)            | 1.1% (0.7–1.7%)           | 0.4% (0.3–0.5%)           | 0.1% (0–0.1%)          | 0% (0–0%)              |
|                                  | Percent (proportion)† | 44.9%                      | 15.5%                     | 30.5%                     | 7.5%                   | 1.5%                   |
| Iran                             | Number                | 7042 (4736–9592)           | 2901 (2417–3493)          | 8324 (7546–9489)          | 3580 (3218–4055)       | 2327 (2019–2646)       |
|                                  | Percent (all-cause)*  | 0.5% (0.4–0.7%)            | 0.8% (0.7–1%)             | 0.3% (0.2–0.3%)           | 0.1% (0.1–0.1%)        | 0.1% (0.1–0.1%)        |
|                                  | Percent (proportion)† | 29.1%                      | 12.0%                     | 34.4%                     | 14.8%                  | 9.6%                   |
| Iraq                             | Number                | 12491 (8153–19026)         | 4083 (2959–5387)          | 6711 (4645–9585)          | 1936 (1322–2614)       | 709 (520–916)          |
|                                  | Percent (all-cause)*  | 0.9% (0.7–1.3%)            | 1.4% (1.1–1.8%)           | 0.3% (0.3–0.4%)           | 0.1% (0.1–0.1%)        | 0.1% (0.1–0.1%)        |
|                                  | Percent (proportion)† | 48.2%                      | 15.7%                     | 25.9%                     | 7.5%                   | 2.7%                   |
| Jordan                           | Number                | 2349 (1566–3596)           | 881 (657–1172)            | 1147 (905–1440)           | 386 (286–508)          | 169 (126–225)          |
|                                  | Percent (all-cause)*  | 0.7% (0.6–0.9%)            | 1.6% (1.2–2%)             | 0.4% (0.4–0.5%)           | 0.1% (0.1–0.2%)        | 0.1% (0.1–0.1%)        |
|                                  | Percent (proportion)† | 47.6%                      | 17.9%                     | 23.2%                     | 7.8%                   | 3.4%                   |
| Kuwait                           | Number                | 206 (132–296)              | 52 (40–67)                | 220 (169–276)             | 83 (63–110)            | 28 (21–36)             |
|                                  | Percent (all-cause)*  | 0.4% (0.3–0.6%)            | 0.6% (0.5–0.7%)           | 0.2% (0.2–0.3%)           | 0.1% (0.1–0.1%)        | 0.1% (0–0.1%)          |
|                                  | Percent (proportion)† | 34.9%                      | 8.8%                      | 37.4%                     | 14.2%                  | 4.7%                   |
| Lebanon                          | Number                | 337 (170–597)              | 97 (58–161)               | 415 (271–609)             | 196 (130–282)          | 185 (128–265)          |
|                                  | Percent (all-cause)*  | 0.4% (0.2–0.6%)            | 0.7% (0.5–1.2%)           | 0.2% (0.2–0.3%)           | 0.1% (0.1–0.1%)        | 0.1% (0–0.1%)          |
|                                  | Percent (proportion)† | 27.4%                      | 7.9%                      | 33.8%                     | 15.9%                  | 15.0%                  |
| Libya                            | Number                | 392 (245–600)              | 151 (104–213)             | 850 (596–1144)            | 301 (195–421)          | 144 (98–200)           |
|                                  | Percent (all-cause)*  | 0.4% (0.3–0.6%)            | 0.5% (0.4–0.7%)           | 0.2% (0.2–0.3%)           | 0.1% (0.1–0.1%)        | 0.1% (0.1–0.1%)        |
|                                  | Percent (proportion)† | 21.3%                      | 8.2%                      | 46.3%                     | 16.4%                  | 7.8%                   |
| Morocco                          | Number                | 9556 (4544–17173)          | 1676 (1018–2357)          | 4318 (2585–6749)          | 2771 (1777–3839)       | 1314 (902–1776)        |
|                                  | Percent (all-cause)*  | 1% (0.5–1.5%)              | 1.1% (0.7–1.5%)           | 0.3% (0.2–0.4%)           | 0.1% (0.1–0.2%)        | 0.1% (0.1–0.1%)        |
|                                  | Percent (proportion)† | 48.7%                      | 8.5%                      | 22.0%                     | 14.1%                  | 6.7%                   |
| Palestine                        | Number                | 906 (608–1307)             | 241 (181–311)             | 312 (256–383)             | 91 (72–115)            | 73 (58–90)             |
|                                  | Percent (all-cause)*  | 0.7% (0.5–0.8%)            | 1% (0.8–1.3%)             | 0.3% (0.2–0.3%)           | 0.1% (0.1–0.1%)        | 0.1% (0.1–0.1%)        |
|                                  | Percent (proportion)† | 55.8%                      | 14.8%                     | 19.2%                     | 5.6%                   | 4.5%                   |
| Oman                             | Number                | 246 (160–392)              | 61 (46–80)                | 201 (163–248)             | 71 (55–91)             | 58 (43–75)             |
|                                  | Percent (all-cause)*  | 0.3% (0.2–0.5%)            | 0.4% (0.3–0.5%)           | 0.1% (0.1–0.1%)           | 0.1% (0.1–0.1%)        | 0.1% (0.1–0.1%)        |
|                                  | Percent (proportion)† | 38.7%                      | 9.6%                      | 31.5%                     | 11.2%                  | 9.0%                   |
| Qatar                            | Number                | 86 (57–127)                | 23 (17–34)                | 141 (102–198)             | 19 (12–28)             | 11 (7–15)              |
|                                  | Percent (all-cause)*  | 0.5% (0.3–0.6%)            | 0.5% (0.4–0.7%)           | 0.2% (0.1–0.2%)           | 0% (0–0.1%)            | 0.1% (0.1–0.1%)        |
|                                  | Percent (proportion)† | 30.8%                      | 8.3%                      | 50.5%                     | 6.6%                   | 3.9%                   |
| Saudi Arabia                     | Number                | 336 (196–517)              | 254 (181–363)             | 5163 (3631–7372)          | 1265 (903–1726)        | 435 (324–568)          |
|                                  | Percent (all-cause)*  | 0.1% (0.1–0.2%)            | 0.4% (0.3–0.6%)           | 0.2% (0.2–0.2%)           | 0.1% (0.1–0.1%)        | 0.1% (0.1–0.1%)        |
|                                  | Percent (proportion)† | 4.5%                       | 3.4%                      | 69.3%                     | 17.0%                  | 5.8%                   |
| Syrian Arab Republic             | Number                | 4268 (2629–6461)           | 3307 (2532–4228)          | 3172 (2258–4326)          | 1052 (725–1483)        | 475 (356–613)          |
|                                  | Percent (all-cause)*  | 1.5% (1.2–1%)              | 3.2% (2.6–4%)             | 0.6% (0.5–0.7%)           | 0.1% (0.1–0.1%)        | 0.1% (0.1–0.1%)        |

**Table S21** Age-specific disability and death related to meningitis in North Africa and Middle East countries in 2019

|                      |                       | <b>Under 5</b>       | <b>5-14 years</b>  | <b>15-49 years</b> | <b>50-69 years</b> | <b>70+ years</b> |
|----------------------|-----------------------|----------------------|--------------------|--------------------|--------------------|------------------|
|                      |                       | Mean (95% UI)        | Mean (95% UI)      | Mean (95% UI)      | Mean (95% UI)      | Mean (95% UI)    |
| Tunisia              | Percent (proportion)† | 34·8%                | 26·9%              | 25·8%              | 8·6%               | 3·9%             |
|                      | Number                | 1074 (634–1586)      | 313 (200–464)      | 933 (623–1348)     | 561 (366–819)      | 410 (274–599)    |
|                      | Percent (all-cause)*  | 0·6% (0·4–0·9%)      | 0·9% (0·6–1·4%)    | 0·3% (0·2–0·4%)    | 0·1% (0·1–0·1%)    | 0·1% (0·1–0·1%)  |
| Türkiye              | Percent (proportion)† | 32·6%                | 9·5%               | 28·3%              | 17·1%              | 12·4%            |
|                      | Number                | 5939 (4161–8336)     | 1890 (1437–2513)   | 4596 (3532–5875)   | 2265 (1653–2941)   | 1292 (973–1683)  |
|                      | Percent (all-cause)*  | 0·4% (0·3–0·6%)      | 1% (0·8–1·3%)      | 0·2% (0·2–0·3%)    | 0·1% (0·1–0·1%)    | 0% (0–0%)        |
| United Arab Emirates | Percent (proportion)† | 37·2%                | 11·8%              | 28·8%              | 14·2%              | 8·1%             |
|                      | Number                | 107 (59–225)         | 102 (61–174)       | 1909 (1115–2948)   | 388 (199–618)      | 26 (13–41)       |
|                      | Percent (all-cause)*  | 0·4% (0·3–0·9%)      | 0·8% (0·5–1·4%)    | 0·3% (0·2–0·4%)    | 0·1% (0·1–0·2%)    | 0·1% (0·0–0·1%)  |
| Yemen                | Percent (proportion)† | 4·2%                 | 4·0%               | 75·4%              | 15·3%              | 1·0%             |
|                      | Number                | 17231 (9316–31383)   | 5020 (2707–7818)   | 6065 (3359–8916)   | 1775 (1096–2621)   | 723 (447–998)    |
|                      | Percent (all-cause)*  | 0·4% (0·3–0·8%)      | 0·9% (0·5–1·3%)    | 0·3% (0·2–0·4%)    | 0·2% (0·1–0·2%)    | 0·1% (0·1–0·2%)  |
| Afghanistan          | Percent (proportion)† | 55·9%                | 16·3%              | 19·7%              | 5·8%               | 2·3%             |
|                      | Number                | 83681 (54266–131524) | 10690 (5483–17304) | 16686 (8146–26755) | 3362 (1784–5232)   | 1049 (547–1570)  |
|                      | Percent (all-cause)*  | 1·2% (0·8–1·7%)      | 1·5% (0·8–2·3%)    | 0·5% (0·3–0·7%)    | 0·2% (0·1–0·3%)    | 0·1% (0·1–0·2%)  |
| Sudan                | Percent (proportion)† | 72·5%                | 9·3%               | 14·5%              | 2·9%               | 0·9%             |
|                      | Number                | 29156 (14358–54381)  | 5792 (3332–9472)   | 7317 (4045–11563)  | 1853 (1088–2779)   | 916 (588–1303)   |
|                      | Percent (all-cause)*  | 0·6% (0·4–1·1%)      | 1·3% (0·8–1·9%)    | 0·4% (0·2–0·5%)    | 0·1% (0·1–0·2%)    | 0·1% (0·1–0·1%)  |
|                      | Percent (proportion)† | 64·7%                | 12·9%              | 16·2%              | 4·1%               | 2·0%             |

DALYs, Disability-Adjusted Life Years; NC, neurological condition; UI, uncertainty interval; YLDs, Years Lived with Disability; YLLs, Years of Life Lost. Count data are absolute numbers and percentage data are rounded to one decimal place. Percentages and number of DALYs, deaths, YLDs, and YLLs are not mutually exclusive: the sum of percentages and number of DALYs, deaths, YLDs, and YLLs in the columns exceeds the totals for all causes combined because of overlap between various causes. Measures with insufficient data are not reported here. \*Percent of all-cause indicates the proportion of the specified measure (ie, DALYs, deaths, YDLs, or YLLs) of meningitis out of all causes in the age-group in the region/nation. †Percent proportion indicates the share of the specified measure (ie, DALYs, deaths, YDLs, or YLLs) of meningitis in different age-groups in the region/nation. Data in parentheses are 95% uncertainty intervals.

***Table S22 Age-specific disability and death related to encephalitis in North Africa and Middle East countries in 2019***

(NEXT PAGE)

**Table S22** Age-specific disability and death related to encephalitis in North Africa and Middle East countries in 2019

|                                               |                       | <b>Under 5</b>            | <b>5-14 years</b>       | <b>15-49 years</b>        | <b>50-69 years</b>     | <b>70+ years</b>       |
|-----------------------------------------------|-----------------------|---------------------------|-------------------------|---------------------------|------------------------|------------------------|
|                                               |                       | Mean (95% UI)             | Mean (95% UI)           | Mean (95% UI)             | Mean (95% UI)          | Mean (95% UI)          |
| <b>DALYs (Disability-Adjusted Life Years)</b> |                       |                           |                         |                           |                        |                        |
| Global                                        | Number                | 1485888 (1164977–1948151) | 888459 (704119–1248375) | 1460107 (1241590–1991998) | 599186 (502978–859621) | 363767 (307901–479386) |
|                                               | Percent (all-cause)*  | 0.3% (0.3–0.4%)           | 0.8% (0.6–1.1%)         | 0.2% (0.2–0.3%)           | 0.1% (0.1–0.1%)        | 0.1% (0.1–0.1%)        |
|                                               | Percent (proportion)† | 31.0%                     | 18.5%                   | 30.4%                     | 12.5%                  | 7.6%                   |
| North Africa and Middle East                  | Number                | 95569 (65409–145030)      | 47356 (36532–63497)     | 78784 (63571–100605)      | 22006 (17846–27372)    | 7334 (6142–8754)       |
|                                               | Percent (all-cause)*  | 0.3% (0.2–0.5%)           | 0.5% (0.4–0.7%)         | 0.1% (0.1–0.2%)           | 0.1% (0–0.1%)          | 0% (0–0%)              |
|                                               | Percent (proportion)† | 38.1%                     | 18.9%                   | 31.4%                     | 8.8%                   | 2.9%                   |
| Algeria                                       | Number                | 2837 (1542–4957)          | 1382 (752–2680)         | 2741 (1819–5337)          | 936 (634–1600)         | 388 (265–610)          |
|                                               | Percent (all-cause)*  | 0.2% (0.1–0.3%)           | 0.3% (0.1–0.6%)         | 0.1% (0.1–0.1%)           | 0% (0–0.1%)            | 0% (0–0%)              |
|                                               | Percent (proportion)† | 34.2%                     | 16.7%                   | 33.1%                     | 11.3%                  | 4.7%                   |
| Bahrain                                       | Number                | 20 (13–30)                | 16 (12–22)              | 82 (64–100)               | 20 (15–28)             | 3 (2–4)                |
|                                               | Percent (all-cause)*  | 0.2% (0.1–0.3%)           | 0.2% (0.1–0.2%)         | 0.1% (0–0.1%)             | 0% (0–0%)              | 0% (0–0%)              |
|                                               | Percent (proportion)† | 13.9%                     | 11.3%                   | 58.3%                     | 14.2%                  | 2.3%                   |
| Egypt                                         | Number                | 32441 (11458–61047)       | 13925 (6823–24481)      | 13616 (9633–19410)        | 4375 (2710–7483)       | 691 (375–1404)         |
|                                               | Percent (all-cause)*  | 1% (0.4–1.8%)             | 0.8% (0.4–1.5%)         | 0.2% (0.1–0.2%)           | 0.1% (0–0.1%)          | 0% (0–0%)              |
|                                               | Percent (proportion)† | 49.9%                     | 21.4%                   | 20.9%                     | 6.7%                   | 1.1%                   |
| Iran                                          | Number                | 3324 (2025–4679)          | 2249 (1684–2706)        | 4509 (3871–5438)          | 1808 (1405–2074)       | 800 (496–953)          |
|                                               | Percent (all-cause)*  | 0.2% (0.1–0.3%)           | 0.2% (0.2–0.3%)         | 0.1% (0–0.1%)             | 0% (0–0%)              | 0% (0–0%)              |
|                                               | Percent (proportion)† | 26.2%                     | 17.7%                   | 35.5%                     | 14.2%                  | 6.3%                   |
| Iraq                                          | Number                | 12882 (6858–21559)        | 7236 (4481–11188)       | 7538 (5426–10315)         | 2129 (1470–2915)       | 624 (436–919)          |
|                                               | Percent (all-cause)*  | 0.9% (0.5–1.3%)           | 1% (0.6–1.6%)           | 0.2% (0.1–0.2%)           | 0.1% (0.1–0.1%)        | 0.1% (0–0.1%)          |
|                                               | Percent (proportion)† | 42.4%                     | 23.8%                   | 24.8%                     | 7.0%                   | 2.1%                   |
| Jordan                                        | Number                | 312 (183–501)             | 282 (197–390)           | 518 (401–675)             | 120 (92–160)           | 30 (21–43)             |
|                                               | Percent (all-cause)*  | 0.1% (0.1–0.1%)           | 0.2% (0.1–0.2%)         | 0.1% (0–0.1%)             | 0% (0–0%)              | 0% (0–0%)              |
|                                               | Percent (proportion)† | 24.7%                     | 22.4%                   | 41.1%                     | 9.5%                   | 2.4%                   |
| Kuwait                                        | Number                | 107 (78–148)              | 45 (35–59)              | 192 (158–247)             | 51 (41–64)             | 8 (7–10)               |
|                                               | Percent (all-cause)*  | 0.2% (0.1–0.2%)           | 0.1% (0.1–0.2%)         | 0% (0–0.1%)               | 0% (0–0%)              | 0% (0–0%)              |
|                                               | Percent (proportion)† | 26.6%                     | 11.2%                   | 47.6%                     | 12.5%                  | 2.0%                   |
| Lebanon                                       | Number                | 256 (110–522)             | 131 (73–254)            | 322 (214–572)             | 119 (80–192)           | 74 (50–116)            |
|                                               | Percent (all-cause)*  | 0.2% (0.1–0.5%)           | 0.3% (0.1–0.5%)         | 0.1% (0–0.1%)             | 0% (0–0%)              | 0% (0–0%)              |
|                                               | Percent (proportion)† | 28.4%                     | 14.6%                   | 35.7%                     | 13.2%                  | 8.2%                   |
| Libya                                         | Number                | 208 (111–366)             | 148 (84–280)            | 460 (293–916)             | 150 (97–275)           | 60 (41–100)            |
|                                               | Percent (all-cause)*  | 0.2% (0.1–0.3%)           | 0.2% (0.1–0.4%)         | 0.1% (0–0.1%)             | 0% (0–0.1%)            | 0% (0–0%)              |
|                                               | Percent (proportion)† | 20.2%                     | 14.4%                   | 44.8%                     | 14.6%                  | 5.9%                   |
| Morocco                                       | Number                | 3119 (1319–6299)          | 1118 (565–2383)         | 2595 (1598–5340)          | 1292 (734–2546)        | 469 (262–904)          |
|                                               | Percent (all-cause)*  | 0.3% (0.1–0.5%)           | 0.3% (0.1–0.6%)         | 0.1% (0.1–0.2%)           | 0% (0–0.1%)            | 0% (0–0%)              |
|                                               | Percent (proportion)† | 36.3%                     | 13.0%                   | 30.2%                     | 15.0%                  | 5.5%                   |
| Palestine                                     | Number                | 276 (166–439)             | 162 (110–239)           | 307 (237–417)             | 59 (45–86)             | 19 (15–24)             |
|                                               | Percent (all-cause)*  | 0.2% (0.1–0.3%)           | 0.2% (0.1–0.3%)         | 0.1% (0.1–0.1%)           | 0% (0–0%)              | 0% (0–0%)              |
|                                               | Percent (proportion)† | 33.5%                     | 19.7%                   | 37.3%                     | 7.2%                   | 2.3%                   |
| Oman                                          | Number                | 1252 (651–2447)           | 528 (297–974)           | 2010 (1296–3772)          | 553 (356–789)          | 163 (90–244)           |
|                                               | Percent (all-cause)*  | 1.5% (0.8–2.8%)           | 1.2% (0.6–2.4%)         | 0.4% (0.3–0.8%)           | 0.3% (0.2–0.5%)        | 0.2% (0.1–0.3%)        |
|                                               | Percent (proportion)† | 27.8%                     | 11.7%                   | 44.6%                     | 12.3%                  | 3.6%                   |
| Qatar                                         | Number                | 47 (27–79)                | 32 (20–48)              | 164 (118–232)             | 28 (19–42)             | 7 (2–13)               |
|                                               | Percent (all-cause)*  | 0.2% (0.1–0.3%)           | 0.2% (0.1–0.3%)         | 0.1% (0–0.1%)             | 0% (0–0%)              | 0% (0–0.1%)            |
|                                               | Percent (proportion)† | 16.9%                     | 11.6%                   | 58.6%                     | 10.2%                  | 2.7%                   |
| Saudi Arabia                                  | Number                | 1032 (372–2932)           | 566 (321–1007)          | 6155 (4317–8947)          | 1446 (950–2083)        | 263 (173–369)          |
|                                               | Percent (all-cause)*  | 0.3% (0.1–0.9%)           | 0.2% (0.1–0.4%)         | 0.1% (0.1–0.2%)           | 0.1% (0–0.1%)          | 0% (0–0.1%)            |
|                                               | Percent (proportion)† | 10.9%                     | 6.0%                    | 65.1%                     | 15.3%                  | 2.8%                   |
| Syrian Arab Republic                          | Number                | 957 (586–1515)            | 886 (652–1168)          | 1186 (879–1662)           | 535 (393–718)          | 150 (109–206)          |
|                                               | Percent (all-cause)*  | 0.3% (0.2–0.4%)           | 0.3% (0.2–0.4%)         | 0.1% (0.1–0.1%)           | 0% (0–0.1%)            | 0% (0–0%)              |
|                                               | Percent (proportion)† | 25.8%                     | 23.8%                   | 31.9%                     | 14.4%                  | 4.0%                   |
| Tunisia                                       | Number                | 468 (241–847)             | 317 (168–626)           | 719 (464–1439)            | 335 (216–599)          | 148 (99–236)           |

**Table S22** Age-specific disability and death related to encephalitis in North Africa and Middle East countries in 2019

|                              |                       | <b>Under 5</b>      | <b>5-14 years</b>  | <b>15-49 years</b>  | <b>50-69 years</b>  | <b>70+ years</b>    |
|------------------------------|-----------------------|---------------------|--------------------|---------------------|---------------------|---------------------|
|                              |                       | Mean (95% UI)       | Mean (95% UI)      | Mean (95% UI)       | Mean (95% UI)       | Mean (95% UI)       |
| Türkiye                      | Percent (all-cause)*  | 0.2% (0.1–0.4%)     | 0.3% (0.2–0.6%)    | 0.1% (0.1–0.1%)     | 0% (0–0.1%)         | 0% (0–0%)           |
|                              | Percent (proportion)† | 23.6%               | 16.0%              | 36.2%               | 16.8%               | 7.5%                |
|                              | Number                | 2987 (1830–4552)    | 2039 (1428–2926)   | 4952 (3977–6224)    | 2386 (1762–3139)    | 882 (669–1128)      |
| United Arab Emirates         | Percent (all-cause)*  | 0.2% (0.1–0.3%)     | 0.3% (0.2–0.4%)    | 0.1% (0.1–0.1%)     | 0% (0–0%)           | 0% (0–0%)           |
|                              | Percent (proportion)† | 22.5%               | 15.4%              | 37.4%               | 18.0%               | 6.7%                |
|                              | Number                | 164 (79–322)        | 126 (73–238)       | 1029 (556–2158)     | 148 (79–274)        | 7 (4–13)            |
| Yemen                        | Percent (all-cause)*  | 0.4% (0.2–0.8%)     | 0.3% (0.1–0.5%)    | 0.1% (0–0.1%)       | 0% (0–0%)           | 0% (0–0%)           |
|                              | Percent (proportion)† | 11.1%               | 8.6%               | 69.8%               | 10.0%               | 0.5%                |
|                              | Number                | 6647 (3073–12758)   | 2038 (981–4187)    | 2033 (1203–4330)    | 505 (301–956)       | 188 (101–330)       |
| Afghanistan                  | Percent (all-cause)*  | 0.2% (0.1–0.3%)     | 0.2% (0.1–0.4%)    | 0.1% (0–0.1%)       | 0% (0–0.1%)         | 0% (0–0%)           |
|                              | Percent (proportion)† | 58.2%               | 17.9%              | 17.8%               | 4.4%                | 1.6%                |
|                              | Number                | 17661 (5302–64837)  | 11518 (5703–23430) | 24614 (15807–37450) | 4322 (2885–6073)    | 2073 (1009–3093)    |
| Sudan                        | Percent (all-cause)*  | 0.2% (0.1–0.8%)     | 0.9% (0.5–1.9%)    | 0.5% (0.3–0.6%)     | 0.2% (0.2–0.3%)     | 0.2% (0.1–0.3%)     |
|                              | Percent (proportion)† | 29.3%               | 19.1%              | 40.9%               | 7.2%                | 3.4%                |
|                              | Number                | 8477 (3578–16918)   | 2562 (1252–4968)   | 2963 (1701–5837)    | 667 (392–1160)      | 278 (151–468)       |
|                              | Percent (all-cause)*  | 0.2% (0.1–0.3%)     | 0.3% (0.1–0.5%)    | 0.1% (0–0.1%)       | 0% (0–0.1%)         | 0% (0–0%)           |
|                              | Percent (proportion)† | 56.7%               | 17.1%              | 19.8%               | 4.5%                | 1.9%                |
| <b>Deaths</b>                |                       |                     |                    |                     |                     |                     |
| Global                       | Number                | 16854 (13145–22089) | 10272 (7997–14849) | 20811 (17527–30313) | 17412 (14377–26231) | 24549 (20530–32281) |
|                              | Percent (all-cause)*  | 0.3% (0.3–0.4%)     | 1.5% (1.2–2.2%)    | 0.3% (0.2–0.4%)     | 0.1% (0.1–0.2%)     | 0.1% (0.1–0.1%)     |
|                              | Percent (proportion)† | 18.7%               | 11.4%              | 23.1%               | 19.4%               | 27.3%               |
| North Africa and Middle East | Number                | 1085 (740–1651)     | 553 (420–754)      | 1169 (911–1551)     | 631 (497–808)       | 487 (404–585)       |
|                              | Percent (all-cause)*  | 0.4% (0.3–0.5%)     | 1.1% (0.9–1.5%)    | 0.2% (0.2–0.3%)     | 0.1% (0.1–0.1%)     | 0% (0–0%)           |
|                              | Percent (proportion)† | 27.6%               | 14.1%              | 29.8%               | 16.1%               | 12.4%               |
| Algeria                      | Number                | 32 (17–56)          | 15 (7–32)          | 36 (21–82)          | 25 (15–47)          | 26 (17–42)          |
|                              | Percent (all-cause)*  | 0.2% (0.1–0.3%)     | 0.6% (0.3–1.2%)    | 0.1% (0.1–0.3%)     | 0% (0–0.1%)         | 0% (0–0%)           |
|                              | Percent (proportion)† | 23.9%               | 11.4%              | 27.0%               | 18.3%               | 19.4%               |
| Bahrain                      | Number                | <0.1 (<0.1–<0.1)    | <0.1 (<0.1–<0.1)   | 1 (1–1)             | 0 (0–1)             | <0.1 (<0.1–<0.1)    |
|                              | Percent (all-cause)*  | 0.2% (0.2–0.4%)     | 0.5% (0.4–0.7%)    | 0.1% (0.1–0.2%)     | 0% (0–0%)           | 0% (0–0%)           |
|                              | Percent (proportion)† | 10.0%               | 7.7%               | 52.5%               | 20.7%               | 9.1%                |
| Egypt                        | Number                | 369 (129–694)       | 166 (78–297)       | 204 (134–305)       | 131 (77–230)        | 41 (21–91)          |
|                              | Percent (all-cause)*  | 1.1% (0.4–2.1%)     | 2% (1.3–5%)        | 0.3% (0.2–0.4%)     | 0.1% (0–0.1%)       | 0% (0–0%)           |
|                              | Percent (proportion)† | 40.5%               | 18.3%              | 22.4%               | 14.4%               | 4.5%                |
| Iran                         | Number                | 37 (22–53)          | 24 (17–30)         | 53 (47–69)          | 46 (32–53)          | 56 (32–69)          |
|                              | Percent (all-cause)*  | 0.2% (0.2–0.3%)     | 0.6% (0.4–0.7%)    | 0.1% (0.1–0.1%)     | 0% (0–0.1%)         | 0% (0–0%)           |
|                              | Percent (proportion)† | 17.1%               | 11.2%              | 24.7%               | 21.0%               | 25.9%               |
| Iraq                         | Number                | 147 (78–246)        | 87 (53–136)        | 116 (80–165)        | 65 (44–90)          | 42 (29–63)          |
|                              | Percent (all-cause)*  | 1% (0.6–1.5%)       | 2.4% (1.5–3.6%)    | 0.3% (0.2–0.4%)     | 0.1% (0.1–0.1%)     | 0.1% (0–0.1%)       |
|                              | Percent (proportion)† | 32.2%               | 19.0%              | 25.5%               | 14.2%               | 9.1%                |
| Jordan                       | Number                | 3 (2–6)             | 3 (2–4)            | 5 (4–7)             | 2 (2–3)             | 2 (1–3)             |
|                              | Percent (all-cause)*  | 0.1% (0.1–0.1%)     | 0.4% (0.3–0.6%)    | 0.1% (0.1–0.2%)     | 0% (0–0%)           | 0% (0–0%)           |
|                              | Percent (proportion)† | 22.6%               | 18.4%              | 34.0%               | 14.9%               | 10.2%               |
| Kuwait                       | Number                | 1 (1–2)             | 0 (0–1)            | 2 (2–3)             | 1 (1–2)             | 1 (0–1)             |
|                              | Percent (all-cause)*  | 0.2% (0.2–0.3%)     | 0.4% (0.3–0.5%)    | 0.1% (0.1–0.2%)     | 0% (0–0.1%)         | 0% (0–0%)           |
|                              | Percent (proportion)† | 20.6%               | 8.2%               | 41.6%               | 20.7%               | 8.8%                |
| Lebanon                      | Number                | 3 (1–6)             | 1 (1–3)            | 4 (2–8)             | 3 (2–5)             | 5 (3–8)             |
|                              | Percent (all-cause)*  | 0.3% (0.1–0.5%)     | 0.8% (0.4–1.7%)    | 0.1% (0.1–0.2%)     | 0% (0–0.1%)         | 0% (0–0%)           |
|                              | Percent (proportion)† | 18.7%               | 8.7%               | 23.8%               | 18.2%               | 30.6%               |
| Libya                        | Number                | 2 (1–4)             | 2 (1–3)            | 6 (4–15)            | 4 (2–8)             | 4 (3–7)             |
|                              | Percent (all-cause)*  | 0.2% (0.1–0.3%)     | 0.4% (0.2–0.9%)    | 0.1% (0.1–0.2%)     | 0% (0–0.1%)         | 0% (0–0%)           |
|                              | Percent (proportion)† | 12.4%               | 8.6%               | 34.4%               | 22.1%               | 22.5%               |
| Morocco                      | Number                | 35 (15–72)          | 12 (5–28)          | 33 (17–84)          | 37 (18–78)          | 33 (17–64)          |
|                              | Percent (all-cause)*  | 0.3% (0.1–0.6%)     | 0.6% (0.3–1.4%)    | 0.1% (0.1–0.3%)     | 0% (0–0.1%)         | 0% (0–0.1%)         |

**Table S22** Age-specific disability and death related to encephalitis in North Africa and Middle East countries in 2019

|                                           |                       | <b>Under 5</b>      | <b>5-14 years</b>   | <b>15-49 years</b>     | <b>50-69 years</b>   | <b>70+ years</b>    |
|-------------------------------------------|-----------------------|---------------------|---------------------|------------------------|----------------------|---------------------|
|                                           |                       | Mean (95% UI)       | Mean (95% UI)       | Mean (95% UI)          | Mean (95% UI)        | Mean (95% UI)       |
| Palestine                                 | Percent (proportion)† | 23·5%               | 8·0%                | 22·3%                  | 24·4%                | 21·8%               |
|                                           | Number                | 3 (2–5)             | 2 (1–2)             | 3 (2–5)                | 1 (1–2)              | 1 (1–2)             |
|                                           | Percent (all-cause)*  | 0·2% (0·1–0·3%)     | 0·5% (0·3–0·8%)     | 0·1% (0·1–0·2%)        | 0% (0–0%)            | 0% (0–0%)           |
| Oman                                      | Percent (proportion)† | 29·6%               | 14·7%               | 30·4%                  | 11·5%                | 13·8%               |
|                                           | Number                | 14 (7–28)           | 6 (4–12)            | 34 (22–65)             | 18 (11–25)           | 10 (6–15)           |
|                                           | Percent (all-cause)*  | 1·8% (0·9–3·4%)     | 3·3% (1·9–6·1%)     | 1% (0·6–1·9%)          | 0·5% (0·3–0·7%)      | 0·2% (0·1–0·3%)     |
| Qatar                                     | Percent (proportion)† | 17·2%               | 7·8%                | 41·5%                  | 21·2%                | 12·3%               |
|                                           | Number                | 1 (0–1)             | 0 (0–1)             | 2 (2–4)                | 1 (0–1)              | 0 (0–1)             |
|                                           | Percent (all-cause)*  | 0·2% (0·1–0·4%)     | 0·6% (0·4–1%)       | 0·1% (0·1–0·2%)        | 0% (0–0·1%)          | 0% (0–0·1%)         |
| Saudi Arabia                              | Percent (proportion)† | 12·1%               | 8·3%                | 53·3%                  | 16·6%                | 9·8%                |
|                                           | Number                | 12 (4–33)           | 6 (3–12)            | 106 (70–159)           | 43 (28–63)           | 18 (11–26)          |
|                                           | Percent (all-cause)*  | 0·4% (0·2–1·2%)     | 0·8% (0·4–1·5%)     | 0·2% (0·1–0·3%)        | 0·1% (0·1–0·1%)      | 0·1% (0–0·1%)       |
| Syrian Arab Republic                      | Percent (proportion)† | 6·3%                | 3·4%                | 57·1%                  | 23·4%                | 9·9%                |
|                                           | Number                | 11 (7–17)           | 10 (7–13)           | 15 (10–23)             | 14 (10–20)           | 9 (7–13)            |
|                                           | Percent (all-cause)*  | 0·3% (0·2–0·5%)     | 0·8% (0·5–1%)       | 0·1% (0·1–0·2%)        | 0% (0–0·1%)          | 0% (0–0%)           |
| Tunisia                                   | Percent (proportion)† | 18·2%               | 16·9%               | 24·9%                  | 24·1%                | 15·9%               |
|                                           | Number                | 5 (3–10)            | 3 (2–7)             | 9 (5–22)               | 8 (5–17)             | 10 (6–16)           |
|                                           | Percent (all-cause)*  | 0·3% (0·1–0·5%)     | 0·8% (0·4–1·6%)     | 0·1% (0·1–0·3%)        | 0% (0–0·1%)          | 0% (0–0%)           |
| Türkiye                                   | Percent (proportion)† | 14·6%               | 9·5%                | 25·1%                  | 23·5%                | 27·3%               |
|                                           | Number                | 34 (20–52)          | 22 (15–33)          | 60 (44–79)             | 61 (39–84)           | 55 (40–72)          |
|                                           | Percent (all-cause)*  | 0·2% (0·1–0·3%)     | 0·9% (0·6–1·3%)     | 0·2% (0·1–0·2%)        | 0% (0–0·1%)          | 0% (0–0%)           |
| United Arab Emirates                      | Percent (proportion)† | 14·6%               | 9·7%                | 25·8%                  | 26·3%                | 23·6%               |
|                                           | Number                | 2 (1–4)             | 1 (1–3)             | 17 (8–39)              | 4 (2–8)              | 0 (0–1)             |
|                                           | Percent (all-cause)*  | 0·6% (0·3–1·1%)     | 0·9% (0·5–1·7%)     | 0·1% (0·1–0·3%)        | 0% (0–0·1%)          | 0% (0–0%)           |
| Yemen                                     | Percent (proportion)† | 7·4%                | 5·8%                | 69·4%                  | 15·7%                | 1·7%                |
|                                           | Number                | 75 (35–146)         | 22 (9–49)           | 24 (11–64)             | 14 (7–29)            | 12 (6–21)           |
|                                           | Percent (all-cause)*  | 0·2% (0·1–0·3%)     | 0·3% (0·1–0·7%)     | 0·1% (0–0·1%)          | 0% (0–0·1%)          | 0% (0–0%)           |
| Afghanistan                               | Percent (proportion)† | 51·0%               | 15·1%               | 16·4%                  | 9·5%                 | 8·0%                |
|                                           | Number                | 201 (59–742)        | 139 (66–288)        | 399 (244–613)          | 135 (87–191)         | 143 (66–209)        |
|                                           | Percent (all-cause)*  | 0·2% (0·1–0·9%)     | 1·6% (0·8–3·4%)     | 0·7% (0·4–0·9%)        | 0·3% (0·2–0·4%)      | 0·3% (0·1–0·4%)     |
| Sudan                                     | Percent (proportion)† | 19·8%               | 13·6%               | 39·3%                  | 13·3%                | 14·0%               |
|                                           | Number                | 97 (40–193)         | 29 (12–59)          | 36 (16–86)             | 18 (9–35)            | 18 (9–31)           |
|                                           | Percent (all-cause)*  | 0·2% (0·1–0·3%)     | 0·5% (0·2–1%)       | 0·1% (0·1–0·2%)        | 0% (0–0·1%)          | 0% (0–0%)           |
|                                           | Percent (proportion)† | 48·8%               | 14·5%               | 18·4%                  | 9·1%                 | 9·2%                |
| <b>YLDs (Years Lived with Disability)</b> |                       |                     |                     |                        |                      |                     |
| Global                                    | Number                | 15652 (10885–21724) | 71038 (48877–97524) | 279051 (194582–379827) | 93297 (67250–124086) | 23398 (16958–30399) |
|                                           | Percent (all-cause)*  | 0·1% (0–0·1%)       | 0·1% (0·1–0·1%)     | 0·1% (0·1–0·1%)        | 0% (0–0%)            | 0% (0–0%)           |
|                                           | Percent (proportion)† | 3·2%                | 14·7%               | 57·8%                  | 19·3%                | 4·8%                |
| North Africa and Middle East              | Number                | 762 (531–1069)      | 3183 (2163–4387)    | 12444 (8617–16994)     | 2944 (2070–3994)     | 466 (335–626)       |
|                                           | Percent (all-cause)*  | 0% (0–0%)           | 0·1% (0–0·1%)       | 0% (0–0%)              | 0% (0–0%)            | 0% (0–0%)           |
|                                           | Percent (proportion)† | 3·8%                | 16·1%               | 62·9%                  | 14·9%                | 2·4%                |
| Algeria                                   | Number                | 42 (28–60)          | 161 (108–225)       | 708 (493–972)          | 207 (146–279)        | 34 (24–47)          |
|                                           | Percent (all-cause)*  | 0% (0–0%)           | 0·1% (0–0·1%)       | 0% (0–0%)              | 0% (0–0%)            | 0% (0–0%)           |
|                                           | Percent (proportion)† | 3·6%                | 14·0%               | 61·4%                  | 18·0%                | 3·0%                |
| Bahrain                                   | Number                | 1 (0–1)             | 3 (2–4)             | 20 (14–28)             | 6 (4–9)              | <0·1 (<0·1–<0·1)    |
|                                           | Percent (all-cause)*  | 0% (0–0%)           | 0% (0–0%)           | 0% (0–0%)              | 0% (0–0%)            | 0% (0–0%)           |
|                                           | Percent (proportion)† | 1·8%                | 8·5%                | 67·6%                  | 21·0%                | 1·1%                |
| Egypt                                     | Number                | 154 (104–217)       | 618 (419–855)       | 1987 (1366–2737)       | 408 (284–554)        | 46 (32–65)          |
|                                           | Percent (all-cause)*  | 0% (0–0·1%)         | 0·1% (0–0·1%)       | 0% (0–0%)              | 0% (0–0%)            | 0% (0–0%)           |
|                                           | Percent (proportion)† | 4·8%                | 19·2%               | 61·8%                  | 12·7%                | 1·4%                |
| Iran                                      | Number                | 78 (53–111)         | 311 (212–431)       | 1524 (1041–2086)       | 454 (317–615)        | 78 (56–106)         |
|                                           | Percent (all-cause)*  | 0% (0–0%)           | 0·1% (0–0·1%)       | 0% (0–0%)              | 0% (0–0%)            | 0% (0–0%)           |



**Table S22** Age-specific disability and death related to encephalitis in North Africa and Middle East countries in 2019

|                      |                       | <b>Under 5</b> | <b>5-14 years</b> | <b>15-49 years</b> | <b>50-69 years</b> | <b>70+ years</b> |
|----------------------|-----------------------|----------------|-------------------|--------------------|--------------------|------------------|
|                      |                       | Mean (95% UI)  | Mean (95% UI)     | Mean (95% UI)      | Mean (95% UI)      | Mean (95% UI)    |
| Iraq                 | Percent (proportion)† | 3·2%           | 12·7%             | 62·3%              | 18·6%              | 3·2%             |
|                      | Number                | 61 (41–85)     | 249 (171–347)     | 848 (587–1157)     | 153 (107–209)      | 24 (17–33)       |
|                      | Percent (all-cause)*  | 0% (0–0%)      | 0·1% (0–0·1%)     | 0% (0–0%)          | 0% (0–0%)          | 0% (0–0%)        |
| Jordan               | Percent (proportion)† | 4·5%           | 18·7%             | 63·5%              | 11·5%              | 1·8%             |
|                      | Number                | 13 (9–18)      | 61 (41–85)        | 223 (153–305)      | 52 (36–71)         | 7 (5–9)          |
|                      | Percent (all-cause)*  | 0% (0–0%)      | 0·1% (0–0·1%)     | 0% (0–0%)          | 0% (0–0%)          | 0% (0–0%)        |
| Kuwait               | Percent (proportion)† | 3·6%           | 17·2%             | 62·7%              | 14·6%              | 1·9%             |
|                      | Number                | 2 (1–3)        | 8 (5–11)          | 58 (40–81)         | 13 (9–18)          | 1 (1–2)          |
|                      | Percent (all-cause)*  | 0% (0–0%)      | 0% (0–0%)         | 0% (0–0%)          | 0% (0–0%)          | 0% (0–0%)        |
| Lebanon              | Percent (proportion)† | 2·4%           | 9·2%              | 70·9%              | 15·6%              | 1·8%             |
|                      | Number                | 7 (5–10)       | 25 (17–35)        | 115 (79–157)       | 38 (26–51)         | 12 (8–16)        |
|                      | Percent (all-cause)*  | 0% (0–0·1%)    | 0·1% (0·1–0·1%)   | 0% (0–0%)          | 0% (0–0%)          | 0% (0–0%)        |
| Libya                | Percent (proportion)† | 3·4%           | 12·7%             | 58·7%              | 19·2%              | 6·1%             |
|                      | Number                | 4 (3–5)        | 20 (13–27)        | 103 (70–140)       | 23 (16–31)         | 4 (3–5)          |
|                      | Percent (all-cause)*  | 0% (0–0%)      | 0% (0–0·1%)       | 0% (0–0%)          | 0% (0–0%)          | 0% (0–0%)        |
| Morocco              | Percent (proportion)† | 2·5%           | 12·8%             | 67·0%              | 15·1%              | 2·6%             |
|                      | Number                | 37 (25–53)     | 169 (115–236)     | 720 (498–988)      | 206 (145–278)      | 27 (19–38)       |
|                      | Percent (all-cause)*  | 0% (0–0%)      | 0·1% (0–0·1%)     | 0% (0–0%)          | 0% (0–0%)          | 0% (0–0%)        |
| Palestine            | Percent (proportion)† | 3·2%           | 14·5%             | 62·2%              | 17·8%              | 2·4%             |
|                      | Number                | 9 (6–13)       | 42 (28–59)        | 124 (86–173)       | 24 (17–33)         | 3 (2–3)          |
|                      | Percent (all-cause)*  | 0% (0–0·1%)    | 0·1% (0·1–0·1%)   | 0% (0–0·1%)        | 0% (0–0%)          | 0% (0–0%)        |
| Oman                 | Percent (proportion)† | 4·5%           | 20·7%             | 61·7%              | 11·9%              | 1·2%             |
|                      | Number                | 5 (3–6)        | 14 (9–19)         | 99 (68–139)        | 17 (12–23)         | 2 (1–3)          |
|                      | Percent (all-cause)*  | 0% (0–0%)      | 0% (0–0·1%)       | 0% (0–0%)          | 0% (0–0%)          | 0% (0–0%)        |
| Qatar                | Percent (proportion)† | 3·4%           | 10·1%             | 72·7%              | 12·4%              | 1·3%             |
|                      | Number                | 1 (1–1)        | 3 (2–4)           | 33 (23–45)         | 5 (3–7)            | <0·1 (<0·1–<0·1) |
|                      | Percent (all-cause)*  | 0% (0–0%)      | 0% (0–0%)         | 0% (0–0%)          | 0% (0–0%)          | 0% (0–0%)        |
| Saudi Arabia         | Percent (proportion)† | 2·0%           | 7·3%              | 78·3%              | 11·9%              | 0·4%             |
|                      | Number                | 17 (11–23)     | 71 (49–98)        | 503 (347–700)      | 81 (56–113)        | 8 (6–12)         |
|                      | Percent (all-cause)*  | 0% (0–0%)      | 0% (0–0%)         | 0% (0–0%)          | 0% (0–0%)          | 0% (0–0%)        |
| Syrian Arab Republic | Percent (proportion)† | 2·4%           | 10·5%             | 73·9%              | 11·9%              | 1·2%             |
|                      | Number                | 16 (11–23)     | 91 (61–127)       | 324 (224–442)      | 108 (77–146)       | 13 (9–18)        |
|                      | Percent (all-cause)*  | 0% (0–0%)      | 0·1% (0–0·1%)     | 0% (0–0%)          | 0% (0–0%)          | 0% (0–0%)        |
| Tunisia              | Percent (proportion)† | 2·9%           | 16·4%             | 58·7%              | 19·6%              | 2·4%             |
|                      | Number                | 10 (7–14)      | 43 (29–60)        | 217 (149–296)      | 86 (60–117)        | 15 (11–21)       |
|                      | Percent (all-cause)*  | 0% (0–0%)      | 0·1% (0–0·1%)     | 0% (0–0%)          | 0% (0–0%)          | 0% (0–0%)        |
| Türkiye              | Percent (proportion)† | 2·6%           | 11·6%             | 58·5%              | 23·1%              | 4·2%             |
|                      | Number                | 50 (33–71)     | 254 (170–361)     | 1647 (1112–2291)   | 611 (424–841)      | 115 (78–158)     |
|                      | Percent (all-cause)*  | 0% (0–0%)      | 0·1% (0–0·1%)     | 0% (0–0%)          | 0% (0–0%)          | 0% (0–0%)        |
| United Arab Emirates | Percent (proportion)† | 1·9%           | 9·5%              | 61·5%              | 22·8%              | 4·3%             |
|                      | Number                | 3 (2–4)        | 12 (9–17)         | 131 (90–182)       | 19 (13–26)         | 0 (0–1)          |
|                      | Percent (all-cause)*  | 0% (0–0%)      | 0% (0–0%)         | 0% (0–0%)          | 0% (0–0%)          | 0% (0–0%)        |
| Yemen                | Percent (proportion)† | 1·6%           | 7·5%              | 79·3%              | 11·3%              | 0·3%             |
|                      | Number                | 60 (41–85)     | 262 (175–370)     | 646 (448–883)      | 89 (63–120)        | 15 (10–21)       |
|                      | Percent (all-cause)*  | 0% (0–0%)      | 0·1% (0–0·1%)     | 0% (0–0%)          | 0% (0–0%)          | 0% (0–0%)        |
| Afghanistan          | Percent (proportion)† | 5·6%           | 24·5%             | 60·3%              | 8·3%               | 1·4%             |
|                      | Number                | 133 (92–187)   | 486 (329–683)     | 1585 (1124–2133)   | 217 (156–293)      | 38 (27–53)       |
|                      | Percent (all-cause)*  | 0% (0–0·1%)    | 0·1% (0·1–0·1%)   | 0·1% (0·1–0·1%)    | 0% (0–0·1%)        | 0% (0–0%)        |
| Sudan                | Percent (proportion)† | 5·4%           | 19·8%             | 64·4%              | 8·8%               | 1·6%             |
|                      | Number                | 63 (42–89)     | 279 (189–388)     | 816 (566–1120)     | 125 (87–170)       | 21 (14–28)       |
|                      | Percent (all-cause)*  | 0% (0–0%)      | 0·1% (0–0·1%)     | 0% (0–0%)          | 0% (0–0%)          | 0% (0–0%)        |
|                      | Percent (proportion)† | 4·8%           | 21·4%             | 62·6%              | 9·6%               | 1·6%             |

YLLs (Years of Life Lost)

**Table S22** Age-specific disability and death related to encephalitis in North Africa and Middle East countries in 2019

|                              |                       | <b>Under 5</b>            | <b>5-14 years</b>       | <b>15-49 years</b>       | <b>50-69 years</b>     | <b>70+ years</b>       |
|------------------------------|-----------------------|---------------------------|-------------------------|--------------------------|------------------------|------------------------|
|                              |                       | Mean (95% UI)             | Mean (95% UI)           | Mean (95% UI)            | Mean (95% UI)          | Mean (95% UI)          |
| Global                       | Number                | 1470236 (1146095–1928348) | 817421 (637038–1181684) | 1181056 (994716–1724553) | 505888 (417339–764216) | 340369 (285930–456845) |
|                              | Percent (all-cause)*  | 0.3% (0.3–0.4%)           | 1.5% (1.2–2.2%)         | 0.3% (0.3–0.4%)          | 0.1% (0.1–0.2%)        | 0.1% (0.1–0.1%)        |
|                              | Percent (proportion)† | 34.1%                     | 18.9%                   | 27.4%                    | 11.7%                  | 7.9%                   |
| North Africa and Middle East | Number                | 94808 (64607–144268)      | 44172 (33536–60239)     | 66340 (51997–88142)      | 19062 (15071–24398)    | 6869 (5623–8335)       |
|                              | Percent (all-cause)*  | 0.4% (0.3–0.5%)           | 1.1% (0.9–1.5%)         | 0.2% (0.2–0.3%)          | 0.1% (0.1–0.1%)        | 0% (0–0%)              |
|                              | Percent (proportion)† | 41.0%                     | 19.1%                   | 28.7%                    | 8.2%                   | 3.0%                   |
| Algeria                      | Number                | 2795 (1497–4920)          | 1221 (589–2527)         | 2033 (1183–4586)         | 729 (441–1398)         | 354 (232–581)          |
|                              | Percent (all-cause)*  | 0.2% (0.1–0.3%)           | 0.6% (0.3–1.2%)         | 0.1% (0.1–0.3%)          | 0.1% (0–0.1%)          | 0% (0–0%)              |
|                              | Percent (proportion)† | 39.2%                     | 17.1%                   | 28.5%                    | 10.2%                  | 5.0%                   |
| Bahrain                      | Number                | 19 (12–29)                | 13 (9–19)               | 62 (44–79)               | 14 (9–21)              | 3 (2–4)                |
|                              | Percent (all-cause)*  | 0.2% (0.2–0.4%)           | 0.5% (0.4–0.7%)         | 0.1% (0.1–0.2%)          | 0% (0–0%)              | 0% (0–0%)              |
|                              | Percent (proportion)† | 17.1%                     | 12.1%                   | 55.8%                    | 12.5%                  | 2.6%                   |
| Egypt                        | Number                | 32287 (11287–60909)       | 13306 (6222–23943)      | 11629 (7712–17334)       | 3966 (2301–7123)       | 645 (331–1366)         |
|                              | Percent (all-cause)*  | 1.1% (0.4–2.1%)           | 2% (1.3–6%)             | 0.3% (0.2–0.4%)          | 0.1% (0–0.1%)          | 0% (0–0%)              |
|                              | Percent (proportion)† | 52.2%                     | 21.5%                   | 18.8%                    | 6.4%                   | 1.0%                   |
| Iran                         | Number                | 3247 (1943–4610)          | 1938 (1378–2388)        | 2985 (2642–3821)         | 1354 (968–1553)        | 722 (424–874)          |
|                              | Percent (all-cause)*  | 0.2% (0.1–0.3%)           | 0.6% (0.4–0.7%)         | 0.1% (0.1–0.1%)          | 0% (0–0.1%)            | 0% (0–0%)              |
|                              | Percent (proportion)† | 31.7%                     | 18.9%                   | 29.1%                    | 13.2%                  | 7.0%                   |
| Iraq                         | Number                | 12821 (6783–21496)        | 6987 (4243–10898)       | 6690 (4580–9534)         | 1976 (1337–2765)       | 599 (408–892)          |
|                              | Percent (all-cause)*  | 1% (0.6–1.5%)             | 2.4% (1.5–3.7%)         | 0.3% (0.3–0.4%)          | 0.1% (0.1–0.2%)        | 0.1% (0–0.1%)          |
|                              | Percent (proportion)† | 44.1%                     | 24.0%                   | 23.0%                    | 6.8%                   | 2.1%                   |
| Jordan                       | Number                | 299 (169–486)             | 221 (139–325)           | 295 (212–433)            | 68 (45–106)            | 23 (15–37)             |
|                              | Percent (all-cause)*  | 0.1% (0.1–0.1%)           | 0.4% (0.3–0.6%)         | 0.1% (0.1–0.2%)          | 0% (0–0%)              | 0% (0–0%)              |
|                              | Percent (proportion)† | 33.0%                     | 24.4%                   | 32.6%                    | 7.5%                   | 2.5%                   |
| Kuwait                       | Number                | 105 (76–146)              | 38 (27–50)              | 134 (107–184)            | 38 (29–50)             | 7 (5–8)                |
|                              | Percent (all-cause)*  | 0.2% (0.2–0.3%)           | 0.4% (0.3–0.5%)         | 0.1% (0.1–0.2%)          | 0% (0–0.1%)            | 0% (0–0%)              |
|                              | Percent (proportion)† | 32.8%                     | 11.8%                   | 41.6%                    | 11.8%                  | 2.0%                   |
| Lebanon                      | Number                | 250 (103–514)             | 107 (49–229)            | 207 (109–457)            | 81 (47–155)            | 62 (38–104)            |
|                              | Percent (all-cause)*  | 0.3% (0.1–0.5%)           | 0.8% (0.4–1.7%)         | 0.1% (0.1–0.3%)          | 0% (0–0.1%)            | 0% (0–0%)              |
|                              | Percent (proportion)† | 35.4%                     | 15.1%                   | 29.3%                    | 11.5%                  | 8.7%                   |
| Libya                        | Number                | 204 (107–362)             | 128 (64–262)            | 357 (198–824)            | 127 (75–253)           | 56 (37–96)             |
|                              | Percent (all-cause)*  | 0.2% (0.1–0.3%)           | 0.4% (0.2–0.9%)         | 0.1% (0.1–0.2%)          | 0% (0–0.1%)            | 0% (0–0.1%)            |
|                              | Percent (proportion)† | 23.4%                     | 14.7%                   | 40.9%                    | 14.5%                  | 6.5%                   |
| Morocco                      | Number                | 3082 (1280–6272)          | 950 (415–2203)          | 1875 (925–4693)          | 1086 (527–2328)        | 442 (232–876)          |
|                              | Percent (all-cause)*  | 0.3% (0.1–0.6%)           | 0.6% (0.3–1.4%)         | 0.1% (0.1–0.3%)          | 0% (0–0.1%)            | 0% (0–0.1%)            |
|                              | Percent (proportion)† | 41.5%                     | 12.8%                   | 25.2%                    | 14.6%                  | 5.9%                   |
| Palestine                    | Number                | 267 (155–431)             | 121 (71–197)            | 183 (129–283)            | 36 (24–62)             | 17 (12–22)             |
|                              | Percent (all-cause)*  | 0.2% (0.1–0.3%)           | 0.5% (0.3–0.8%)         | 0.1% (0.1–0.2%)          | 0% (0–0%)              | 0% (0–0%)              |
|                              | Percent (proportion)† | 42.9%                     | 19.4%                   | 29.4%                    | 5.7%                   | 2.7%                   |
| Oman                         | Number                | 1247 (646–2443)           | 514 (285–963)           | 1910 (1200–3670)         | 536 (340–773)          | 161 (87–242)           |
|                              | Percent (all-cause)*  | 1.7% (0.9–3.4%)           | 3.3% (1.9–6.2%)         | 1% (0.6–1.9%)            | 0.5% (0.3–0.7%)        | 0.3% (0.1–0.4%)        |
|                              | Percent (proportion)† | 28.5%                     | 11.8%                   | 43.7%                    | 12.3%                  | 3.7%                   |
| Qatar                        | Number                | 46 (26–78)                | 29 (17–46)              | 131 (85–198)             | 23 (14–37)             | 7 (2–12)               |
|                              | Percent (all-cause)*  | 0.2% (0.1–0.4%)           | 0.6% (0.4–1%)           | 0.1% (0.1–0.2%)          | 0.1% (0–0.1%)          | 0.1% (0–0.1%)          |
|                              | Percent (proportion)† | 19.6%                     | 12.3%                   | 55.1%                    | 9.9%                   | 3.1%                   |
| Saudi Arabia                 | Number                | 1015 (357–2912)           | 494 (250–934)           | 5653 (3800–8458)         | 1365 (866–1999)        | 255 (165–360)          |
|                              | Percent (all-cause)*  | 0.4% (0.2–1.2%)           | 0.8% (0.4–1.5%)         | 0.2% (0.2–0.3%)          | 0.1% (0.1–0.1%)        | 0.1% (0–0.1%)          |
|                              | Percent (proportion)† | 11.6%                     | 5.6%                    | 64.4%                    | 15.5%                  | 2.9%                   |
| Syrian Arab Republic         | Number                | 941 (571–1502)            | 795 (568–1074)          | 863 (581–1335)           | 427 (293–614)          | 137 (98–193)           |
|                              | Percent (all-cause)*  | 0.3% (0.2–0.5%)           | 0.8% (0.5–1%)           | 0.2% (0.1–0.2%)          | 0% (0–0.1%)            | 0% (0–0%)              |
|                              | Percent (proportion)† | 29.8%                     | 25.1%                   | 27.3%                    | 13.5%                  | 4.3%                   |
| Tunisia                      | Number                | 459 (231–838)             | 274 (126–574)           | 502 (261–1222)           | 249 (136–516)          | 133 (83–222)           |

**Table S22** Age-specific disability and death related to encephalitis in North Africa and Middle East countries in 2019

|                      |                       | <b>Under 5</b>     | <b>5-14 years</b>  | <b>15-49 years</b>  | <b>50-69 years</b> | <b>70+ years</b> |
|----------------------|-----------------------|--------------------|--------------------|---------------------|--------------------|------------------|
|                      |                       | Mean (95% UI)      | Mean (95% UI)      | Mean (95% UI)       | Mean (95% UI)      | Mean (95% UI)    |
| Türkiye              | Percent (all-cause)*  | 0.3% (0.1–0.5%)    | 0.8% (0.4–1.6%)    | 0.1% (0.1–0.3%)     | 0% (0–0.1%)        | 0% (0–0%)        |
|                      | Percent (proportion)† | 28.4%              | 17.0%              | 31.1%               | 15.4%              | 8.2%             |
|                      | Number                | 2937 (1779–4498)   | 1785 (1173–2646)   | 3304 (2486–4373)    | 1775 (1151–2454)   | 768 (555–1014)   |
|                      | Percent (all-cause)*  | 0.2% (0.1–0.3%)    | 0.9% (0.6–1.3%)    | 0.2% (0.1–0.2%)     | 0.1% (0–0.1%)      | 0% (0–0%)        |
| United Arab Emirates | Percent (proportion)† | 27.8%              | 16.9%              | 31.3%               | 16.8%              | 7.3%             |
|                      | Number                | 161 (76–319)       | 114 (61–227)       | 898 (434–2030)      | 129 (62–258)       | 7 (4–12)         |
|                      | Percent (all-cause)*  | 0.6% (0.3–1.1%)    | 0.9% (0.5–1.8%)    | 0.1% (0.1–0.3%)     | 0% (0–0.1%)        | 0% (0–0%)        |
| Yemen                | Percent (proportion)† | 12.3%              | 8.7%               | 68.6%               | 9.9%               | 0.5%             |
|                      | Number                | 6587 (3016–12705)  | 1776 (732–3940)    | 1387 (595–3690)     | 417 (211–870)      | 173 (87–317)     |
|                      | Percent (all-cause)*  | 0.2% (0.1–0.3%)    | 0.3% (0.1–0.7%)    | 0.1% (0–0.2%)       | 0% (0–0.1%)        | 0% (0–0.1%)      |
| Afghanistan          | Percent (proportion)† | 63.7%              | 17.2%              | 13.4%               | 4.0%               | 1.7%             |
|                      | Number                | 17528 (5191–64732) | 11033 (5247–23016) | 23029 (14249–35779) | 4105 (2664–5881)   | 2035 (970–3053)  |
|                      | Percent (all-cause)*  | 0.2% (0.1–0.9%)    | 1.6% (0.8–3.4%)    | 0.7% (0.5–1%)       | 0.3% (0.2–0.4%)    | 0.3% (0.1–0.4%)  |
| Sudan                | Percent (proportion)† | 30.4%              | 19.1%              | 39.9%               | 7.1%               | 3.5%             |
|                      | Number                | 8414 (3510–16853)  | 2283 (974–4715)    | 2146 (932–5078)     | 542 (270–1050)     | 258 (131–444)    |
|                      | Percent (all-cause)*  | 0.2% (0.1–0.3%)    | 0.5% (0.2–1%)      | 0.1% (0.1–0.2%)     | 0% (0–0.1%)        | 0% (0–0.1%)      |
|                      | Percent (proportion)† | 61.7%              | 16.7%              | 15.7%               | 4.0%               | 1.9%             |

DALYs, Disability-Adjusted Life Years; NC, neurological condition; UI, uncertainty interval; YLDs, Years Lived with Disability; YLLs, Years of Life Lost. Count data are absolute numbers and percentage data are rounded to one decimal place. Percentages and number of DALYs, YLDs, YLLs, deaths, incident cases, and prevalent cases are not mutually exclusive: the sum of percentages and number of DALYs, YLDs, YLLs, deaths, incident cases, and prevalent cases in the columns exceeds the totals for all causes combined because of overlap between various causes. Measures with insufficient data are not reported here. \*Percent of all-cause indicates the proportion of the specified measure (ie, DALYs, deaths, YDLs, or YLLs) of encephalitis out of all causes in the age-group in the region/nation. †Percent proportion indicates the share of the specified measure (ie, DALYs, deaths, YDLs, or YLLs) of encephalitis in different age-groups in the region/nation. Data in parentheses are 95% uncertainty intervals.

***Table S23 Age-specific disability and death related to tetanus in North Africa and Middle East countries in 2019***  
(NEXT PAGE)

**Table S23** Age-specific disability and death related to tetanus in North Africa and Middle East countries in 2019

|                                               |                       | <b>Under 5</b>            | <b>5-14 years</b>     | <b>15-49 years</b>     | <b>50-69 years</b>    | <b>70+ years</b>    |
|-----------------------------------------------|-----------------------|---------------------------|-----------------------|------------------------|-----------------------|---------------------|
|                                               |                       | Mean (95% UI)             | Mean (95% UI)         | Mean (95% UI)          | Mean (95% UI)         | Mean (95% UI)       |
| <b>DALYs (Disability-Adjusted Life Years)</b> |                       |                           |                       |                        |                       |                     |
| Global                                        | Number                | 1619573 (1205997–2379454) | 125916 (75807–255182) | 370093 (240811–567062) | 157195 (96617–216106) | 43605 (28503–59460) |
|                                               | Percent (all-cause)*  | 0.3% (0.3–0.5%)           | 0.1% (0.1–0.2%)       | 0% (0–0.1%)            | 0% (0–0%)             | 0% (0–0%)           |
|                                               | Percent (proportion)† | 69.9%                     | 5.4%                  | 16.0%                  | 6.8%                  | 1.9%                |
| North Africa and Middle East                  | Number                | 62662 (29942–111836)      | 5854 (2453–16910)     | 12324 (7059–20470)     | 4677 (2828–8544)      | 1896 (1048–3182)    |
|                                               | Percent (all-cause)*  | 0.2% (0.1–0.4%)           | 0.1% (0–0.2%)         | 0% (0–0%)              | 0% (0–0%)             | 0% (0–0%)           |
|                                               | Percent (proportion)† | 71.7%                     | 6.7%                  | 14.1%                  | 5.4%                  | 2.2%                |
| Algeria                                       | Number                | 238 (134–459)             | 69 (53–119)           | 167 (127–292)          | 42 (22–131)           | 23 (12–62)          |
|                                               | Percent (all-cause)*  | 0% (0–0%)                 | 0% (0–0%)             | 0% (0–0%)              | 0% (0–0%)             | 0% (0–0%)           |
|                                               | Percent (proportion)† | 44.0%                     | 12.9%                 | 31.0%                  | 7.8%                  | 4.3%                |
| Bahrain                                       | Number                | 1 (1–2)                   | 1 (1–2)               | 6 (5–8)                | 1 (1–2)               | <0.1 (<0.1–<0.1)    |
|                                               | Percent (all-cause)*  | 0% (0–0%)                 | 0% (0–0%)             | 0% (0–0%)              | 0% (0–0%)             | 0% (0–0%)           |
|                                               | Percent (proportion)† | 13.4%                     | 14.4%                 | 61.4%                  | 10.1%                 | 0.7%                |
| Egypt                                         | Number                | 2906 (564–11348)          | 688 (218–2293)        | 2482 (483–7269)        | 1133 (369–3866)       | 196 (71–614)        |
|                                               | Percent (all-cause)*  | 0.1% (0–0.3%)             | 0% (0–0.1%)           | 0% (0–0.1%)            | 0% (0–0%)             | 0% (0–0%)           |
|                                               | Percent (proportion)† | 39.2%                     | 9.3%                  | 33.5%                  | 15.3%                 | 2.7%                |
| Iran                                          | Number                | 362 (223–596)             | 115 (94–151)          | 312 (275–406)          | 82 (45–171)           | 41 (16–72)          |
|                                               | Percent (all-cause)*  | 0% (0–0%)                 | 0% (0–0%)             | 0% (0–0%)              | 0% (0–0%)             | 0% (0–0%)           |
|                                               | Percent (proportion)† | 39.7%                     | 12.6%                 | 34.3%                  | 8.9%                  | 4.5%                |
| Iraq                                          | Number                | 1347 (655–2551)           | 141 (69–266)          | 225 (135–406)          | 52 (27–148)           | 17 (9–55)           |
|                                               | Percent (all-cause)*  | 0.1% (0–0.2%)             | 0% (0–0%)             | 0% (0–0%)              | 0% (0–0%)             | 0% (0–0%)           |
|                                               | Percent (proportion)† | 75.5%                     | 7.9%                  | 12.6%                  | 2.9%                  | 1.0%                |
| Jordan                                        | Number                | 49 (27–94)                | 23 (19–27)            | 41 (34–50)             | 5 (4–11)              | 1 (0–4)             |
|                                               | Percent (all-cause)*  | 0% (0–0%)                 | 0% (0–0%)             | 0% (0–0%)              | 0% (0–0%)             | 0% (0–0%)           |
|                                               | Percent (proportion)† | 41.1%                     | 19.3%                 | 34.7%                  | 4.1%                  | 0.7%                |
| Kuwait                                        | Number                | <0.1 (<0.1–<0.1)          | <0.1 (<0.1–<0.1)      | 1 (0–2)                | 0 (0–1)               | <0.1 (<0.1–<0.1)    |
|                                               | Percent (all-cause)*  | 0% (0–0%)                 | 0% (0–0%)             | 0% (0–0%)              | 0% (0–0%)             | 0% (0–0%)           |
|                                               | Percent (proportion)† | 4.4%                      | 9.2%                  | 58.6%                  | 24.6%                 | 3.1%                |
| Lebanon                                       | Number                | 106 (9–397)               | 101 (21–301)          | 288 (60–852)           | 125 (28–552)          | 147 (26–681)        |
|                                               | Percent (all-cause)*  | 0.1% (0–0.4%)             | 0.2% (0–0.6%)         | 0.1% (0–0.2%)          | 0% (0–0.1%)           | 0% (0–0.2%)         |
|                                               | Percent (proportion)† | 13.8%                     | 13.1%                 | 37.6%                  | 16.4%                 | 19.1%               |
| Libya                                         | Number                | 19 (6–42)                 | 7 (6–12)              | 29 (21–55)             | 7 (3–24)              | 4 (1–11)            |
|                                               | Percent (all-cause)*  | 0% (0–0%)                 | 0% (0–0%)             | 0% (0–0%)              | 0% (0–0%)             | 0% (0–0%)           |
|                                               | Percent (proportion)† | 28.8%                     | 11.1%                 | 43.7%                  | 10.6%                 | 5.8%                |
| Morocco                                       | Number                | 6219 (1152–25946)         | 254 (37–803)          | 545 (119–1989)         | 438 (79–1681)         | 213 (22–815)        |
|                                               | Percent (all-cause)*  | 0.6% (0.1–2.4%)           | 0.1% (0–0.2%)         | 0% (0–0.1%)            | 0% (0–0.1%)           | 0% (0–0%)           |
|                                               | Percent (proportion)† | 81.1%                     | 3.3%                  | 7.1%                   | 5.7%                  | 2.8%                |
| Palestine                                     | Number                | 41 (24–77)                | 9 (7–11)              | 18 (15–21)             | 2 (1–5)               | 1 (0–2)             |
|                                               | Percent (all-cause)*  | 0% (0–0%)                 | 0% (0–0%)             | 0% (0–0%)              | 0% (0–0%)             | 0% (0–0%)           |
|                                               | Percent (proportion)† | 58.0%                     | 12.7%                 | 24.9%                  | 3.3%                  | 1.0%                |
| Oman                                          | Number                | 11 (7–17)                 | 5 (4–6)               | 21 (17–25)             | 2 (1–4)               | 1 (0–3)             |
|                                               | Percent (all-cause)*  | 0% (0–0%)                 | 0% (0–0%)             | 0% (0–0%)              | 0% (0–0%)             | 0% (0–0%)           |
|                                               | Percent (proportion)† | 26.9%                     | 13.3%                 | 52.4%                  | 4.6%                  | 2.8%                |
| Qatar                                         | Number                | 2 (2–3)                   | 2 (2–3)               | 12 (9–16)              | 1 (1–2)               | <0.1 (<0.1–<0.1)    |
|                                               | Percent (all-cause)*  | 0% (0–0%)                 | 0% (0–0%)             | 0% (0–0%)              | 0% (0–0%)             | 0% (0–0%)           |
|                                               | Percent (proportion)† | 14.1%                     | 12.1%                 | 67.8%                  | 5.5%                  | 0.5%                |
| Saudi Arabia                                  | Number                | 122 (53–272)              | 29 (16–52)            | 504 (120–917)          | 84 (28–182)           | 10 (5–24)           |
|                                               | Percent (all-cause)*  | 0% (0–0.1%)               | 0% (0–0%)             | 0% (0–0%)              | 0% (0–0%)             | 0% (0–0%)           |
|                                               | Percent (proportion)† | 16.3%                     | 3.9%                  | 67.3%                  | 11.2%                 | 1.3%                |
| Syrian Arab Republic                          | Number                | 158 (69–391)              | 35 (24–75)            | 75 (43–158)            | 29 (11–91)            | 10 (4–31)           |
|                                               | Percent (all-cause)*  | 0% (0–0.1%)               | 0% (0–0%)             | 0% (0–0%)              | 0% (0–0%)             | 0% (0–0%)           |
|                                               | Percent (proportion)† | 51.5%                     | 11.3%                 | 24.4%                  | 9.5%                  | 3.4%                |
| Tunisia                                       | Number                | 31 (16–67)                | 16 (11–22)            | 41 (28–63)             | 12 (6–36)             | 6 (3–17)            |

**Table S23** Age-specific disability and death related to tetanus in North Africa and Middle East countries in 2019

|                              |                       | <b>Under 5</b>      | <b>5-14 years</b> | <b>15-49 years</b> | <b>50-69 years</b> | <b>70+ years</b> |
|------------------------------|-----------------------|---------------------|-------------------|--------------------|--------------------|------------------|
|                              |                       | Mean (95% UI)       | Mean (95% UI)     | Mean (95% UI)      | Mean (95% UI)      | Mean (95% UI)    |
| Türkiye                      | Percent (all-cause)*  | 0% (0-0%)           | 0% (0-0%)         | 0% (0-0%)          | 0% (0-0%)          | 0% (0-0%)        |
|                              | Percent (proportion)† | 29.2%               | 14.8%             | 39.0%              | 10.9%              | 6.0%             |
|                              | Number                | 188 (118-293)       | 91 (66-129)       | 263 (200-345)      | 118 (63-206)       | 52 (31-99)       |
| United Arab Emirates         | Percent (all-cause)*  | 0% (0-0%)           | 0% (0-0%)         | 0% (0-0%)          | 0% (0-0%)          | 0% (0-0%)        |
|                              | Percent (proportion)† | 26.4%               | 12.7%             | 37.0%              | 16.6%              | 7.3%             |
|                              | Number                | 35 (15-76)          | 22 (6-124)        | 385 (184-1098)     | 513 (119-933)      | 105 (11-201)     |
| Yemen                        | Percent (all-cause)*  | 0.1% (0-0.2%)       | 0% (0-0.3%)       | 0% (0-0.1%)        | 0.1% (0-0.2%)      | 0.2% (0-0.4%)    |
|                              | Percent (proportion)† | 3.3%                | 2.1%              | 36.3%              | 48.4%              | 9.9%             |
|                              | Number                | 3240 (1068-6938)    | 362 (81-1613)     | 334 (104-1327)     | 182 (55-534)       | 77 (23-195)      |
| Afghanistan                  | Percent (all-cause)*  | 0.1% (0-0.2%)       | 0% (0-0.2%)       | 0% (0-0%)          | 0% (0-0%)          | 0% (0-0%)        |
|                              | Percent (proportion)† | 77.2%               | 8.6%              | 8.0%               | 4.3%               | 1.8%             |
|                              | Number                | 45500 (20151-89774) | 3676 (1158-12409) | 6277 (3397-12016)  | 1726 (904-3228)    | 931 (341-1837)   |
| Sudan                        | Percent (all-cause)*  | 0.6% (0.3-1.1%)     | 0.3% (0.1-1%)     | 0.1% (0.1-0.2%)    | 0.1% (0-0.2%)      | 0.1% (0-0.2%)    |
|                              | Percent (proportion)† | 78.3%               | 6.3%              | 10.8%              | 3.0%               | 1.6%             |
|                              | Number                | 2023 (694-4754)     | 202 (79-789)      | 285 (118-919)      | 117 (43-356)       | 59 (24-162)      |
|                              | Percent (all-cause)*  | 0% (0-0.1%)         | 0% (0-0.1%)       | 0% (0-0%)          | 0% (0-0%)          | 0% (0-0%)        |
|                              | Percent (proportion)† | 75.3%               | 7.5%              | 10.6%              | 4.4%               | 2.2%             |
| <b>Deaths</b>                |                       |                     |                   |                    |                    |                  |
| Global                       | Number                | 18293 (13609-26836) | 1581 (946-3190)   | 6744 (4356-10169)  | 5129 (3176-7089)   | 2936 (1888-3966) |
|                              | Percent (all-cause)*  | 0.4% (0.3-0.5%)     | 0.2% (0.1-0.5%)   | 0.1% (0.1-0.1%)    | 0% (0-0%)          | 0% (0-0%)        |
|                              | Percent (proportion)† | 52.7%               | 4.6%              | 19.4%              | 14.8%              | 8.5%             |
| North Africa and Middle East | Number                | 707 (338-1260)      | 74 (31-211)       | 222 (127-365)      | 153 (91-278)       | 134 (73-223)     |
|                              | Percent (all-cause)*  | 0.2% (0.1-0.4%)     | 0.1% (0.1-0.4%)   | 0% (0-0.1%)        | 0% (0-0%)          | 0% (0-0%)        |
|                              | Percent (proportion)† | 54.8%               | 5.7%              | 17.2%              | 11.9%              | 10.4%            |
| Algeria                      | Number                | 3 (2-5)             | 1 (1-1)           | 3 (2-5)            | 1 (1-4)            | 2 (1-5)          |
|                              | Percent (all-cause)*  | 0% (0-0%)           | 0% (0-0.1%)       | 0% (0-0%)          | 0% (0-0%)          | 0% (0-0%)        |
|                              | Percent (proportion)† | 28.0%               | 9.1%              | 30.5%              | 14.5%              | 18.0%            |
| Bahrain                      | Number                | <0.1 (<0.1-<0.1)    | <0.1 (<0.1-<0.1)  | <0.1 (<0.1-<0.1)   | <0.1 (<0.1-<0.1)   | <0.1 (<0.1-<0.1) |
|                              | Percent (all-cause)*  | 0% (0-0%)           | 0.1% (0-0.1%)     | 0% (0-0%)          | 0% (0-0%)          | 0% (0-0%)        |
|                              | Percent (proportion)† | 8.5%                | 9.9%              | 61.8%              | 17.1%              | 2.6%             |
| Egypt                        | Number                | 33 (6-128)          | 9 (3-29)          | 45 (8-130)         | 37 (12-124)        | 13 (5-39)        |
|                              | Percent (all-cause)*  | 0.1% (0-0.4%)       | 0.1% (0-0.3%)     | 0.1% (0-0.2%)      | 0% (0-0.1%)        | 0% (0-0%)        |
|                              | Percent (proportion)† | 24.2%               | 6.4%              | 32.7%              | 27.2%              | 9.5%             |
| Iran                         | Number                | 4 (3-7)             | 1 (1-2)           | 6 (5-7)            | 3 (1-6)            | 3 (1-6)          |
|                              | Percent (all-cause)*  | 0% (0-0%)           | 0% (0-0%)         | 0% (0-0%)          | 0% (0-0%)          | 0% (0-0%)        |
|                              | Percent (proportion)† | 24.2%               | 8.5%              | 32.6%              | 15.9%              | 18.7%            |
| Iraq                         | Number                | 15 (7-29)           | 2 (1-3)           | 4 (2-7)            | 2 (1-5)            | 1 (1-4)          |
|                              | Percent (all-cause)*  | 0.1% (0.1-0.2%)     | 0% (0-0.1%)       | 0% (0-0%)          | 0% (0-0%)          | 0% (0-0%)        |
|                              | Percent (proportion)† | 63.9%               | 7.5%              | 16.3%              | 6.9%               | 5.4%             |
| Jordan                       | Number                | 1 (0-1)             | <0.1 (<0.1-<0.1)  | 1 (1-1)            | <0.1 (<0.1-<0.1)   | <0.1 (<0.1-<0.1) |
|                              | Percent (all-cause)*  | 0% (0-0%)           | 0% (0-0%)         | 0% (0-0%)          | 0% (0-0%)          | 0% (0-0%)        |
|                              | Percent (proportion)† | 31.6%               | 16.4%             | 39.9%              | 8.7%               | 3.3%             |
| Kuwait                       | Number                | <0.1 (<0.1-<0.1)    | <0.1 (<0.1-<0.1)  | <0.1 (<0.1-<0.1)   | <0.1 (<0.1-<0.1)   | <0.1 (<0.1-<0.1) |
|                              | Percent (all-cause)*  | 0% (0-0%)           | 0% (0-0%)         | 0% (0-0%)          | 0% (0-0%)          | 0% (0-0%)        |
|                              | Percent (proportion)† | 2.1%                | 5.2%              | 48.2%              | 33.2%              | 11.4%            |
| Lebanon                      | Number                | 1 (0-5)             | 1 (0-4)           | 5 (1-15)           | 4 (1-20)           | 12 (2-51)        |
|                              | Percent (all-cause)*  | 0.1% (0-0.5%)       | 0.8% (0.2-2.2%)   | 0.2% (0-0.5%)      | 0.1% (0-0.2%)      | 0.1% (0-0.2%)    |
|                              | Percent (proportion)† | 5.2%                | 5.4%              | 21.4%              | 18.8%              | 49.2%            |
| Libya                        | Number                | <0.1 (<0.1-<0.1)    | <0.1 (<0.1-<0.1)  | 1 (0-1)            | 0 (0-1)            | 0 (0-1)          |
|                              | Percent (all-cause)*  | 0% (0-0%)           | 0% (0-0%)         | 0% (0-0%)          | 0% (0-0%)          | 0% (0-0%)        |
|                              | Percent (proportion)† | 16.2%               | 6.9%              | 38.4%              | 16.9%              | 21.6%            |
| Morocco                      | Number                | 70 (13-292)         | 3 (0-10)          | 10 (2-35)          | 14 (3-56)          | 16 (2-59)        |
|                              | Percent (all-cause)*  | 0.6% (0.1-2.7%)     | 0.2% (0-0.6%)     | 0% (0-0.1%)        | 0% (0-0.1%)        | 0% (0-0.1%)      |

**Table S23** Age-specific disability and death related to tetanus in North Africa and Middle East countries in 2019

|                                           |                       | <b>Under 5</b>        | <b>5-14 years</b> | <b>15-49 years</b> | <b>50-69 years</b> | <b>70+ years</b> |       |
|-------------------------------------------|-----------------------|-----------------------|-------------------|--------------------|--------------------|------------------|-------|
|                                           |                       | Mean (95% UI)         | Mean (95% UI)     | Mean (95% UI)      | Mean (95% UI)      | Mean (95% UI)    |       |
| Palestine                                 | Percent (proportion)† | 62.0%                 | 2.8%              | 8.6%               | 12.8%              | 13.8%            |       |
|                                           | Number                | 0 (0-1)               | <0.1 (<0.1-<0.1)  | <0.1 (<0.1-<0.1)   | <0.1 (<0.1-<0.1)   | <0.1 (<0.1-<0.1) |       |
|                                           | Percent (all-cause)*  | 0% (0-0.1%)           | 0% (0-0%)         | 0% (0-0%)          | 0% (0-0%)          | 0% (0-0%)        |       |
| Oman                                      | Percent (proportion)† | 46.5%                 | 11.3%             | 29.5%              | 7.4%               | 5.3%             |       |
|                                           | Number                | <0.1 (<0.1-<0.1)      | <0.1 (<0.1-<0.1)  | <0.1 (<0.1-<0.1)   | <0.1 (<0.1-<0.1)   | <0.1 (<0.1-<0.1) |       |
|                                           | Percent (all-cause)*  | 0% (0-0%)             | 0% (0-0%)         | 0% (0-0%)          | 0% (0-0%)          | 0% (0-0%)        |       |
| Qatar                                     | Percent (proportion)† | 18.2%                 | 9.9%              | 53.3%              | 8.4%               | 10.3%            |       |
|                                           | Number                | <0.1 (<0.1-<0.1)      | <0.1 (<0.1-<0.1)  | <0.1 (<0.1-<0.1)   | <0.1 (<0.1-<0.1)   | <0.1 (<0.1-<0.1) |       |
|                                           | Percent (all-cause)*  | 0% (0-0%)             | 0% (0-0.1%)       | 0% (0-0%)          | 0% (0-0%)          | 0% (0-0%)        |       |
| Saudi Arabia                              | Percent (proportion)† | 9.5%                  | 8.8%              | 69.9%              | 9.8%               | 2.0%             |       |
|                                           | Number                | 1 (1-3)               | 0 (0-1)           | 10 (2-18)          | 3 (1-5)            | 1 (0-2)          |       |
|                                           | Percent (all-cause)*  | 0.1% (0-0.1%)         | 0% (0-0.1%)       | 0% (0-0%)          | 0% (0-0%)          | 0% (0-0%)        |       |
| Syrian Arab Republic                      | Percent (proportion)† | 9.6%                  | 2.6%              | 65.7%              | 17.7%              | 4.5%             |       |
|                                           | Number                | 2 (1-4)               | 0 (0-1)           | 1 (1-3)            | 1 (0-3)            | 1 (0-2)          |       |
|                                           | Percent (all-cause)*  | 0.1% (0-0.1%)         | 0% (0-0.1%)       | 0% (0-0%)          | 0% (0-0%)          | 0% (0-0%)        |       |
| Tunisia                                   | Percent (proportion)† | 34.4%                 | 8.4%              | 25.1%              | 17.8%              | 14.4%            |       |
|                                           | Number                | 0 (0-1)               | <0.1 (<0.1-<0.1)  | 1 (1-1)            | 0 (0-1)            | 0 (0-1)          |       |
|                                           | Percent (all-cause)*  | 0% (0-0%)             | 0% (0-0.1%)       | 0% (0-0%)          | 0% (0-0%)          | 0% (0-0%)        |       |
| Türkiye                                   | Percent (proportion)† | 16.5%                 | 9.2%              | 34.2%              | 17.8%              | 22.3%            |       |
|                                           | Number                | 2 (1-3)               | 1 (1-2)           | 5 (4-6)            | 4 (2-7)            | 4 (2-8)          |       |
|                                           | Percent (all-cause)*  | 0% (0-0%)             | 0% (0-0.1%)       | 0% (0-0%)          | 0% (0-0%)          | 0% (0-0%)        |       |
| United Arab Emirates                      | Percent (proportion)† | 13.6%                 | 7.2%              | 29.5%              | 26.1%              | 23.6%            |       |
|                                           | Number                | 0 (0-1)               | 0 (0-2)           | 8 (4-21)           | 17 (4-32)          | 7 (1-13)         |       |
|                                           | Percent (all-cause)*  | 0.1% (0.1-0.3%)       | 0.2% (0-1%)       | 0.1% (0-0.1%)      | 0.1% (0-0.3%)      | 0.3% (0-0.6%)    |       |
| Yemen                                     | Percent (proportion)† | 1.2%                  | 0.8%              | 24.3%              | 52.1%              | 21.5%            |       |
|                                           | Number                | 37 (12-79)            | 5 (1-20)          | 6 (2-23)           | 6 (2-17)           | 5 (2-13)         |       |
|                                           | Percent (all-cause)*  | 0.1% (0-0.2%)         | 0.1% (0-0.3%)     | 0% (0-0.1%)        | 0% (0-0%)          | 0% (0-0%)        |       |
| Afghanistan                               | Percent (proportion)† | 62.8%                 | 7.8%              | 10.2%              | 10.4%              | 8.9%             |       |
|                                           | Number                | 513 (227-1011)        | 46 (14-156)       | 112 (60-212)       | 56 (30-103)        | 65 (23-124)      |       |
|                                           | Percent (all-cause)*  | 0.6% (0.3-1.2%)       | 0.5% (0.2-1.9%)   | 0.2% (0.1-0.3%)    | 0.1% (0.1-0.2%)    | 0.1% (0-0.2%)    |       |
| Sudan                                     | Percent (proportion)† | 64.8%                 | 5.8%              | 14.2%              | 7.0%               | 8.2%             |       |
|                                           | Number                | 23 (8-54)             | 3 (1-10)          | 5 (2-15)           | 4 (1-12)           | 4 (2-11)         |       |
|                                           | Percent (all-cause)*  | 0% (0-0.1%)           | 0% (0-0.2%)       | 0% (0-0%)          | 0% (0-0%)          | 0% (0-0%)        |       |
|                                           |                       | Percent (proportion)† | 59.7%             | 6.6%               | 12.7%              | 10.1%            | 10.9% |
| <b>YLDs (Years Lived with Disability)</b> |                       |                       |                   |                    |                    |                  |       |
| Global                                    | Number                | 440 (269-674)         | 285 (148-472)     | 718 (386-1174)     | 219 (120-344)      | 83 (48-128)      |       |
|                                           | Percent (all-cause)*  | 0% (0-0%)             | 0% (0-0%)         | 0% (0-0%)          | 0% (0-0%)          | 0% (0-0%)        |       |
|                                           | Percent (proportion)† | 25.2%                 | 16.3%             | 41.2%              | 12.5%              | 4.7%             |       |
| North Africa and Middle East              | Number                | 9 (4-17)              | 4 (2-7)           | 10 (5-16)          | 3 (2-5)            | 2 (1-3)          |       |
|                                           | Percent (all-cause)*  | 0% (0-0%)             | 0% (0-0%)         | 0% (0-0%)          | 0% (0-0%)          | 0% (0-0%)        |       |
|                                           | Percent (proportion)† | 33.3%                 | 14.2%             | 34.8%              | 11.4%              | 6.3%             |       |
| Algeria                                   | Number                | <0.1 (<0.1-<0.1)      | <0.1 (<0.1-<0.1)  | <0.1 (<0.1-<0.1)   | <0.1 (<0.1-<0.1)   | <0.1 (<0.1-<0.1) |       |
|                                           | Percent (all-cause)*  | 0% (0-0%)             | 0% (0-0%)         | 0% (0-0%)          | 0% (0-0%)          | 0% (0-0%)        |       |
|                                           | Percent (proportion)† | 23.2%                 | 14.2%             | 42.4%              | 12.9%              | 7.4%             |       |
| Bahrain                                   | Number                | <0.1 (<0.1-<0.1)      | <0.1 (<0.1-<0.1)  | <0.1 (<0.1-<0.1)   | <0.1 (<0.1-<0.1)   | <0.1 (<0.1-<0.1) |       |
|                                           | Percent (all-cause)*  | 0% (0-0%)             | 0% (0-0%)         | 0% (0-0%)          | 0% (0-0%)          | 0% (0-0%)        |       |
|                                           | Percent (proportion)† | 8.9%                  | 10.7%             | 62.1%              | 16.8%              | 1.4%             |       |
| Egypt                                     | Number                | 1 (0-2)               | 1 (0-1)           | 2 (1-3)            | 1 (0-2)            | <0.1 (<0.1-<0.1) |       |
|                                           | Percent (all-cause)*  | 0% (0-0%)             | 0% (0-0%)         | 0% (0-0%)          | 0% (0-0%)          | 0% (0-0%)        |       |
|                                           | Percent (proportion)† | 17.6%                 | 16.1%             | 44.1%              | 17.3%              | 5.0%             |       |
| Iran                                      | Number                | <0.1 (<0.1-<0.1)      | <0.1 (<0.1-<0.1)  | <0.1 (<0.1-<0.1)   | <0.1 (<0.1-<0.1)   | <0.1 (<0.1-<0.1) |       |
|                                           | Percent (all-cause)*  | 0% (0-0%)             | 0% (0-0%)         | 0% (0-0%)          | 0% (0-0%)          | 0% (0-0%)        |       |
|                                           | Percent (proportion)† | 18.6%                 | 14.0%             | 45.8%              | 13.6%              | 8.1%             |       |



**Table S23** Age-specific disability and death related to tetanus in North Africa and Middle East countries in 2019

|                      |                       | <b>Under 5</b>   | <b>5-14 years</b> | <b>15-49 years</b> | <b>50-69 years</b> | <b>70+ years</b> |
|----------------------|-----------------------|------------------|-------------------|--------------------|--------------------|------------------|
|                      |                       | Mean (95% UI)    | Mean (95% UI)     | Mean (95% UI)      | Mean (95% UI)      | Mean (95% UI)    |
| Iraq                 | Number                | 0 (0-1)          | <0.1 (<0.1-<0.1)  | 1 (0-1)            | <0.1 (<0.1-<0.1)   | <0.1 (<0.1-<0.1) |
|                      | Percent (all-cause)*  | 0% (0-0%)        | 0% (0-0%)         | 0% (0-0%)          | 0% (0-0%)          | 0% (0-0%)        |
|                      | Percent (proportion)† | 25.2%            | 18.2%             | 44.9%              | 8.9%               | 2.8%             |
| Jordan               | Number                | <0.1 (<0.1-<0.1) | <0.1 (<0.1-<0.1)  | <0.1 (<0.1-<0.1)   | <0.1 (<0.1-<0.1)   | <0.1 (<0.1-<0.1) |
|                      | Percent (all-cause)*  | 0% (0-0%)        | 0% (0-0%)         | 0% (0-0%)          | 0% (0-0%)          | 0% (0-0%)        |
|                      | Percent (proportion)† | 22.1%            | 19.0%             | 47.2%              | 9.5%               | 2.2%             |
| Kuwait               | Number                | <0.1 (<0.1-<0.1) | <0.1 (<0.1-<0.1)  | <0.1 (<0.1-<0.1)   | <0.1 (<0.1-<0.1)   | <0.1 (<0.1-<0.1) |
|                      | Percent (all-cause)*  | 0% (0-0%)        | 0% (0-0%)         | 0% (0-0%)          | 0% (0-0%)          | 0% (0-0%)        |
|                      | Percent (proportion)† | 11.3%            | 12.3%             | 62.9%              | 11.7%              | 1.9%             |
| Lebanon              | Number                | <0.1 (<0.1-<0.1) | <0.1 (<0.1-<0.1)  | <0.1 (<0.1-<0.1)   | <0.1 (<0.1-<0.1)   | 0 (0-1)          |
|                      | Percent (all-cause)*  | 0% (0-0%)        | 0% (0-0%)         | 0% (0-0%)          | 0% (0-0%)          | 0% (0-0%)        |
|                      | Percent (proportion)† | 7.4%             | 7.2%              | 24.6%              | 17.2%              | 43.6%            |
| Libya                | Number                | <0.1 (<0.1-<0.1) | <0.1 (<0.1-<0.1)  | <0.1 (<0.1-<0.1)   | <0.1 (<0.1-<0.1)   | <0.1 (<0.1-<0.1) |
|                      | Percent (all-cause)*  | 0% (0-0%)        | 0% (0-0%)         | 0% (0-0%)          | 0% (0-0%)          | 0% (0-0%)        |
|                      | Percent (proportion)† | 15.9%            | 12.0%             | 50.0%              | 13.4%              | 8.7%             |
| Morocco              | Number                | 1 (0-4)          | 0 (0-1)           | 1 (1-3)            | 1 (0-1)            | 0 (0-1)          |
|                      | Percent (all-cause)*  | 0% (0-0%)        | 0% (0-0%)         | 0% (0-0%)          | 0% (0-0%)          | 0% (0-0%)        |
|                      | Percent (proportion)† | 25.9%            | 13.1%             | 38.9%              | 15.2%              | 6.9%             |
| Palestine            | Number                | <0.1 (<0.1-<0.1) | <0.1 (<0.1-<0.1)  | <0.1 (<0.1-<0.1)   | <0.1 (<0.1-<0.1)   | <0.1 (<0.1-<0.1) |
|                      | Percent (all-cause)*  | 0% (0-0%)        | 0% (0-0%)         | 0% (0-0%)          | 0% (0-0%)          | 0% (0-0%)        |
|                      | Percent (proportion)† | 29.0%            | 19.6%             | 41.2%              | 7.8%               | 2.4%             |
| Oman                 | Number                | <0.1 (<0.1-<0.1) | <0.1 (<0.1-<0.1)  | <0.1 (<0.1-<0.1)   | <0.1 (<0.1-<0.1)   | <0.1 (<0.1-<0.1) |
|                      | Percent (all-cause)*  | 0% (0-0%)        | 0% (0-0%)         | 0% (0-0%)          | 0% (0-0%)          | 0% (0-0%)        |
|                      | Percent (proportion)† | 19.7%            | 11.7%             | 58.8%              | 7.1%               | 2.8%             |
| Qatar                | Number                | <0.1 (<0.1-<0.1) | <0.1 (<0.1-<0.1)  | <0.1 (<0.1-<0.1)   | <0.1 (<0.1-<0.1)   | <0.1 (<0.1-<0.1) |
|                      | Percent (all-cause)*  | 0% (0-0%)        | 0% (0-0%)         | 0% (0-0%)          | 0% (0-0%)          | 0% (0-0%)        |
|                      | Percent (proportion)† | 14.3%            | 10.7%             | 66.3%              | 8.0%               | 0.7%             |
| Saudi Arabia         | Number                | <0.1 (<0.1-<0.1) | <0.1 (<0.1-<0.1)  | 0 (0-1)            | <0.1 (<0.1-<0.1)   | <0.1 (<0.1-<0.1) |
|                      | Percent (all-cause)*  | 0% (0-0%)        | 0% (0-0%)         | 0% (0-0%)          | 0% (0-0%)          | 0% (0-0%)        |
|                      | Percent (proportion)† | 11.4%            | 9.3%              | 65.5%              | 11.7%              | 2.1%             |
| Syrian Arab Republic | Number                | <0.1 (<0.1-<0.1) | <0.1 (<0.1-<0.1)  | <0.1 (<0.1-<0.1)   | <0.1 (<0.1-<0.1)   | <0.1 (<0.1-<0.1) |
|                      | Percent (all-cause)*  | 0% (0-0%)        | 0% (0-0%)         | 0% (0-0%)          | 0% (0-0%)          | 0% (0-0%)        |
|                      | Percent (proportion)† | 18.5%            | 16.7%             | 42.5%              | 16.2%              | 6.0%             |
| Tunisia              | Number                | <0.1 (<0.1-<0.1) | <0.1 (<0.1-<0.1)  | <0.1 (<0.1-<0.1)   | <0.1 (<0.1-<0.1)   | <0.1 (<0.1-<0.1) |
|                      | Percent (all-cause)*  | 0% (0-0%)        | 0% (0-0%)         | 0% (0-0%)          | 0% (0-0%)          | 0% (0-0%)        |
|                      | Percent (proportion)† | 16.9%            | 13.0%             | 43.5%              | 16.9%              | 9.7%             |
| Türkiye              | Number                | <0.1 (<0.1-<0.1) | <0.1 (<0.1-<0.1)  | 1 (0-1)            | <0.1 (<0.1-<0.1)   | <0.1 (<0.1-<0.1) |
|                      | Percent (all-cause)*  | 0% (0-0%)        | 0% (0-0%)         | 0% (0-0%)          | 0% (0-0%)          | 0% (0-0%)        |
|                      | Percent (proportion)† | 10.5%            | 12.2%             | 50.3%              | 18.8%              | 8.2%             |
| United Arab Emirates | Number                | <0.1 (<0.1-<0.1) | <0.1 (<0.1-<0.1)  | <0.1 (<0.1-<0.1)   | <0.1 (<0.1-<0.1)   | <0.1 (<0.1-<0.1) |
|                      | Percent (all-cause)*  | 0% (0-0%)        | 0% (0-0%)         | 0% (0-0%)          | 0% (0-0%)          | 0% (0-0%)        |
|                      | Percent (proportion)† | 2.6%             | 2.5%              | 33.8%              | 43.8%              | 17.4%            |
| Yemen                | Number                | 1 (0-1)          | 0 (0-1)           | 0 (0-1)            | <0.1 (<0.1-<0.1)   | <0.1 (<0.1-<0.1) |
|                      | Percent (all-cause)*  | 0% (0-0%)        | 0% (0-0%)         | 0% (0-0%)          | 0% (0-0%)          | 0% (0-0%)        |
|                      | Percent (proportion)† | 36.5%            | 18.9%             | 31.7%              | 8.3%               | 4.6%             |
| Afghanistan          | Number                | 6 (2-12)         | 2 (1-3)           | 3 (2-5)            | 1 (0-1)            | 1 (0-1)          |
|                      | Percent (all-cause)*  | 0% (0-0%)        | 0% (0-0%)         | 0% (0-0%)          | 0% (0-0%)          | 0% (0-0%)        |
|                      | Percent (proportion)† | 48.9%            | 13.3%             | 25.2%              | 6.6%               | 5.9%             |
| Sudan                | Number                | 0 (0-1)          | <0.1 (<0.1-<0.1)  | 0 (0-1)            | <0.1 (<0.1-<0.1)   | <0.1 (<0.1-<0.1) |
|                      | Percent (all-cause)*  | 0% (0-0%)        | 0% (0-0%)         | 0% (0-0%)          | 0% (0-0%)          | 0% (0-0%)        |
|                      | Percent (proportion)† | 30.9%            | 18.9%             | 36.9%              | 8.5%               | 4.7%             |

**YLLs (Years of Life Lost)**

**Table S23** Age-specific disability and death related to tetanus in North Africa and Middle East countries in 2019

|                              |                       | <b>Under 5</b>            | <b>5-14 years</b>     | <b>15-49 years</b>     | <b>50-69 years</b>    | <b>70+ years</b>    |
|------------------------------|-----------------------|---------------------------|-----------------------|------------------------|-----------------------|---------------------|
|                              |                       | Mean (95% UI)             | Mean (95% UI)         | Mean (95% UI)          | Mean (95% UI)         | Mean (95% UI)       |
| Global                       | Number                | 1619133 (1205610–2379105) | 125631 (75338–254791) | 369374 (239946–566351) | 156976 (96397–215864) | 43522 (28415–59378) |
|                              | Percent (all-cause)*  | 0.4% (0.3–0.5%)           | 0.2% (0.1–0.5%)       | 0.1% (0.1–0.1%)        | 0% (0–0.1%)           | 0% (0–0%)           |
|                              | Percent (proportion)† | 70.0%                     | 5.4%                  | 16.0%                  | 6.8%                  | 1.9%                |
| North Africa and Middle East | Number                | 62652 (29937–111824)      | 5850 (2448–16905)     | 12314 (7046–20458)     | 4674 (2826–8538)      | 1894 (1047–3179)    |
|                              | Percent (all-cause)*  | 0.2% (0.1–0.4%)           | 0.2% (0.1–0.4%)       | 0% (0–0.1%)            | 0% (0–0%)             | 0% (0–0%)           |
|                              | Percent (proportion)† | 71.7%                     | 6.7%                  | 14.1%                  | 5.3%                  | 2.2%                |
| Algeria                      | Number                | 238 (134–459)             | 69 (53–119)           | 167 (127–291)          | 42 (22–131)           | 23 (12–62)          |
|                              | Percent (all-cause)*  | 0% (0–0%)                 | 0% (0–0.1%)           | 0% (0–0%)              | 0% (0–0%)             | 0% (0–0%)           |
|                              | Percent (proportion)† | 44.1%                     | 12.9%                 | 31.0%                  | 7.8%                  | 4.3%                |
| Bahrain                      | Number                | 1 (1–2)                   | 1 (1–2)               | 6 (5–8)                | 1 (1–2)               | <0.1 (<0.1–<0.1)    |
|                              | Percent (all-cause)*  | 0% (0–0%)                 | 0.1% (0–0.1%)         | 0% (0–0%)              | 0% (0–0%)             | 0% (0–0%)           |
|                              | Percent (proportion)† | 13.4%                     | 14.4%                 | 61.4%                  | 10.1%                 | 0.7%                |
| Egypt                        | Number                | 2906 (563–11347)          | 687 (217–2292)        | 2480 (481–7266)        | 1132 (368–3864)       | 196 (71–614)        |
|                              | Percent (all-cause)*  | 0.1% (0–0.4%)             | 0.1% (0–0.3%)         | 0.1% (0–0.2%)          | 0% (0–0.1%)           | 0% (0–0%)           |
|                              | Percent (proportion)† | 39.3%                     | 9.3%                  | 33.5%                  | 15.3%                 | 2.7%                |
| Iran                         | Number                | 362 (223–595)             | 115 (94–151)          | 312 (275–406)          | 81 (45–171)           | 41 (16–72)          |
|                              | Percent (all-cause)*  | 0% (0–0%)                 | 0% (0–0%)             | 0% (0–0%)              | 0% (0–0%)             | 0% (0–0%)           |
|                              | Percent (proportion)† | 39.7%                     | 12.6%                 | 34.3%                  | 8.9%                  | 4.5%                |
| Iraq                         | Number                | 1346 (654–2550)           | 141 (69–266)          | 225 (134–406)          | 52 (27–147)           | 17 (9–55)           |
|                              | Percent (all-cause)*  | 0.1% (0.1–0.2%)           | 0% (0–0.1%)           | 0% (0–0%)              | 0% (0–0%)             | 0% (0–0%)           |
|                              | Percent (proportion)† | 75.6%                     | 7.9%                  | 12.6%                  | 2.9%                  | 1.0%                |
| Jordan                       | Number                | 49 (27–94)                | 23 (19–27)            | 41 (34–50)             | 5 (4–11)              | 1 (0–4)             |
|                              | Percent (all-cause)*  | 0% (0–0%)                 | 0% (0–0%)             | 0% (0–0%)              | 0% (0–0%)             | 0% (0–0%)           |
|                              | Percent (proportion)† | 41.2%                     | 19.3%                 | 34.6%                  | 4.1%                  | 0.7%                |
| Kuwait                       | Number                | <0.1 (<0.1–<0.1)          | <0.1 (<0.1–<0.1)      | 1 (0–2)                | 0 (0–1)               | <0.1 (<0.1–<0.1)    |
|                              | Percent (all-cause)*  | 0% (0–0%)                 | 0% (0–0%)             | 0% (0–0%)              | 0% (0–0%)             | 0% (0–0%)           |
|                              | Percent (proportion)† | 4.0%                      | 9.0%                  | 58.3%                  | 25.5%                 | 3.2%                |
| Lebanon                      | Number                | 106 (9–397)               | 101 (21–301)          | 288 (60–851)           | 125 (28–551)          | 147 (26–680)        |
|                              | Percent (all-cause)*  | 0.1% (0–0.4%)             | 0.8% (0.2–2.3%)       | 0.2% (0–0.5%)          | 0.1% (0–0.3%)         | 0.1% (0–0.2%)       |
|                              | Percent (proportion)† | 13.8%                     | 13.2%                 | 37.6%                  | 16.4%                 | 19.1%               |
| Libya                        | Number                | 19 (6–42)                 | 7 (6–12)              | 29 (21–54)             | 7 (3–24)              | 4 (1–11)            |
|                              | Percent (all-cause)*  | 0% (0–0%)                 | 0% (0–0%)             | 0% (0–0%)              | 0% (0–0%)             | 0% (0–0%)           |
|                              | Percent (proportion)† | 28.8%                     | 11.1%                 | 43.7%                  | 10.6%                 | 5.8%                |
| Morocco                      | Number                | 6218 (1152–25943)         | 253 (37–803)          | 544 (116–1987)         | 438 (78–1680)         | 212 (22–814)        |
|                              | Percent (all-cause)*  | 0.6% (0.1–2.7%)           | 0.2% (0–0.6%)         | 0% (0–0.1%)            | 0% (0–0.1%)           | 0% (0–0.1%)         |
|                              | Percent (proportion)† | 81.1%                     | 3.3%                  | 7.1%                   | 5.7%                  | 2.8%                |
| Palestine                    | Number                | 41 (24–77)                | 9 (7–11)              | 18 (15–21)             | 2 (1–5)               | 1 (0–2)             |
|                              | Percent (all-cause)*  | 0% (0–0.1%)               | 0% (0–0%)             | 0% (0–0%)              | 0% (0–0%)             | 0% (0–0%)           |
|                              | Percent (proportion)† | 58.0%                     | 12.7%                 | 24.9%                  | 3.3%                  | 1.0%                |
| Oman                         | Number                | 11 (7–17)                 | 5 (4–6)               | 21 (17–25)             | 2 (1–4)               | 1 (0–3)             |
|                              | Percent (all-cause)*  | 0% (0–0%)                 | 0% (0–0%)             | 0% (0–0%)              | 0% (0–0%)             | 0% (0–0%)           |
|                              | Percent (proportion)† | 26.9%                     | 13.3%                 | 52.4%                  | 4.6%                  | 2.8%                |
| Qatar                        | Number                | 2 (2–3)                   | 2 (2–3)               | 12 (9–16)              | 1 (1–2)               | <0.1 (<0.1–<0.1)    |
|                              | Percent (all-cause)*  | 0% (0–0%)                 | 0% (0–0.1%)           | 0% (0–0%)              | 0% (0–0%)             | 0% (0–0%)           |
|                              | Percent (proportion)† | 14.1%                     | 12.1%                 | 67.8%                  | 5.5%                  | 0.5%                |
| Saudi Arabia                 | Number                | 122 (53–272)              | 29 (16–52)            | 504 (120–917)          | 84 (28–182)           | 10 (5–24)           |
|                              | Percent (all-cause)*  | 0.1% (0–0.1%)             | 0% (0–0.1%)           | 0% (0–0%)              | 0% (0–0%)             | 0% (0–0%)           |
|                              | Percent (proportion)† | 16.3%                     | 3.9%                  | 67.3%                  | 11.2%                 | 1.3%                |
| Syrian Arab Republic         | Number                | 158 (69–391)              | 35 (24–74)            | 75 (43–158)            | 29 (11–91)            | 10 (4–31)           |
|                              | Percent (all-cause)*  | 0.1% (0–0.1%)             | 0% (0–0.1%)           | 0% (0–0%)              | 0% (0–0%)             | 0% (0–0%)           |
|                              | Percent (proportion)† | 51.5%                     | 11.3%                 | 24.4%                  | 9.5%                  | 3.4%                |
| Tunisia                      | Number                | 31 (16–67)                | 16 (11–22)            | 41 (28–63)             | 12 (6–36)             | 6 (3–17)            |

**Table S23** Age-specific disability and death related to tetanus in North Africa and Middle East countries in 2019

|                      |                       | <b>Under 5</b>      | <b>5-14 years</b> | <b>15-49 years</b> | <b>50-69 years</b> | <b>70+ years</b> |
|----------------------|-----------------------|---------------------|-------------------|--------------------|--------------------|------------------|
|                      |                       | Mean (95% UI)       | Mean (95% UI)     | Mean (95% UI)      | Mean (95% UI)      | Mean (95% UI)    |
| Türkiye              | Percent (all-cause)*  | 0% (0–0%)           | 0% (0–0·1%)       | 0% (0–0%)          | 0% (0–0%)          | 0% (0–0%)        |
|                      | Percent (proportion)† | 29·3%               | 14·8%             | 39·0%              | 10·9%              | 6·0%             |
|                      | Number                | 187 (118–293)       | 90 (66–129)       | 262 (199–344)      | 118 (63–205)       | 51 (31–99)       |
|                      | Percent (all-cause)*  | 0% (0–0%)           | 0% (0–0·1%)       | 0% (0–0%)          | 0% (0–0%)          | 0% (0–0%)        |
| United Arab Emirates | Percent (proportion)† | 26·4%               | 12·7%             | 37·0%              | 16·6%              | 7·3%             |
|                      | Number                | 35 (15–76)          | 22 (6–124)        | 384 (184–1098)     | 513 (119–933)      | 105 (11–201)     |
|                      | Percent (all-cause)*  | 0·1% (0·1–0·3%)     | 0·2% (0–1%)       | 0·1% (0–0·1%)      | 0·1% (0–0·2%)      | 0·3% (0–0·6%)    |
|                      | Percent (proportion)† | 3·3%                | 2·1%              | 36·3%              | 48·4%              | 9·9%             |
| Yemen                | Number                | 3240 (1068–6937)    | 362 (80–1613)     | 334 (103–1327)     | 182 (55–534)       | 77 (23–195)      |
|                      | Percent (all-cause)*  | 0·1% (0–0·2%)       | 0·1% (0–0·3%)     | 0% (0–0·1%)        | 0% (0–0%)          | 0% (0–0%)        |
|                      | Percent (proportion)† | 77·2%               | 8·6%              | 8·0%               | 4·3%               | 1·8%             |
|                      | Number                | 45495 (20149–89766) | 3675 (1156–12407) | 6274 (3394–12012)  | 1725 (903–3228)    | 930 (341–1835)   |
| Afghanistan          | Percent (all-cause)*  | 0·6% (0·3–1·2%)     | 0·5% (0·2–1·9%)   | 0·2% (0·1–0·3%)    | 0·1% (0·1–0·2%)    | 0·1% (0–0·3%)    |
|                      | Percent (proportion)† | 78·3%               | 6·3%              | 10·8%              | 3·0%               | 1·6%             |
|                      | Number                | 2023 (694–4753)     | 201 (79–789)      | 284 (118–918)      | 117 (43–356)       | 59 (24–162)      |
|                      | Percent (all-cause)*  | 0% (0–0·1%)         | 0% (0–0·2%)       | 0% (0–0%)          | 0% (0–0%)          | 0% (0–0%)        |
| Sudan                | Percent (proportion)† | 75·4%               | 7·5%              | 10·6%              | 4·4%               | 2·2%             |

DALYs, Disability-Adjusted Life Years; NC, neurological condition; UI, uncertainty interval; YLDs, Years Lived with Disability; YLLs, Years of Life Lost. Count data are absolute numbers and percentage data are rounded to one decimal place. Percentages and number of DALYs, YLDs, YLLs, deaths, incident cases, and prevalent cases are not mutually exclusive: the sum of percentages and number of DALYs, YLDs, YLLs, deaths, incident cases, and prevalent cases in the columns exceeds the totals for all causes combined because of overlap between various causes. Measures with insufficient data are not reported here. \*Percent of all-cause indicates the proportion of the specified measure (ie, DALYs, deaths, YDLs, or YLLs) of tetanus out of all causes in the age-group in the region/nation. †Percent proportion indicates the share of the specified measure (ie, DALYs, deaths, YDLs, or YLLs) of tetanus in different age-groups in the region/nation. Data in parentheses are 95% uncertainty intervals.

***Table S24 Age-specific disability and death related to brain and central nervous system cancer in North Africa and Middle East countries in 2019***  
(NEXT PAGE)

**Table S24** Age-specific disability and death related to brain and central nervous system cancer in North Africa and Middle East countries in 2019

|                                               |                       | Under 5                | 5-14 years              | 15-49 years               | 50-69 years               | 70+ years                |
|-----------------------------------------------|-----------------------|------------------------|-------------------------|---------------------------|---------------------------|--------------------------|
|                                               |                       | Mean (95% UI)          | Mean (95% UI)           | Mean (95% UI)             | Mean (95% UI)             | Mean (95% UI)            |
| <b>DALYs (Disability-Adjusted Life Years)</b> |                       |                        |                         |                           |                           |                          |
| Global                                        | Number                | 747941 (563194–929664) | 918491 (729458–1064866) | 2917784 (2305066–3247571) | 3012572 (2332933–3308723) | 1063083 (730700–1201828) |
|                                               | Percent (all-cause)*  | 0.2% (0.1–0.2%)        | 0.8% (0.6–0.9%)         | 0.4% (0.3–0.4%)           | 0.4% (0.3–0.5%)           | 0.2% (0.2–0.3%)          |
|                                               | Percent (proportion)† | 8.6%                   | 10.6%                   | 33.7%                     | 34.8%                     | 12.3%                    |
| North Africa and Middle East                  | Number                | 57666 (37139–77963)    | 111665 (81689–136938)   | 288648 (191271–352604)    | 202369 (137242–241816)    | 55923 (35555–66454)      |
|                                               | Percent (all-cause)*  | 0.2% (0.1–0.3%)        | 1.2% (0.9–1.5%)         | 0.5% (0.3–0.6%)           | 0.5% (0.3–0.6%)           | 0.2% (0.2–0.3%)          |
|                                               | Percent (proportion)† | 8.1%                   | 15.6%                   | 40.3%                     | 28.3%                     | 7.8%                     |
| Algeria                                       | Number                | 2209 (1042–3741)       | 4383 (2267–6413)        | 9561 (5868–12862)         | 5947 (3845–7928)          | 1574 (1104–2088)         |
|                                               | Percent (all-cause)*  | 0.1% (0.1–0.2%)        | 0.9% (0.4–1.3%)         | 0.3% (0.2–0.3%)           | 0.2% (0.2–0.3%)           | 0.1% (0.1–0.1%)          |
|                                               | Percent (proportion)† | 9.3%                   | 18.5%                   | 40.4%                     | 25.1%                     | 6.6%                     |
| Bahrain                                       | Number                | 30 (19–43)             | 88 (56–118)             | 499 (298–675)             | 358 (209–512)             | 46 (33–63)               |
|                                               | Percent (all-cause)*  | 0.3% (0.2–0.4%)        | 0.9% (0.6–1.3%)         | 0.4% (0.2–0.5%)           | 0.4% (0.2–0.5%)           | 0.2% (0.1–0.2%)          |
|                                               | Percent (proportion)† | 2.9%                   | 8.6%                    | 48.8%                     | 35.1%                     | 4.5%                     |
| Egypt                                         | Number                | 6819 (2834–11537)      | 15714 (9268–23272)      | 36205 (23519–50331)       | 25833 (17032–40238)       | 4485 (2455–8982)         |
|                                               | Percent (all-cause)*  | 0.2% (0.1–0.3%)        | 1% (0.5–1.5%)           | 0.4% (0.3–0.5%)           | 0.3% (0.2–0.4%)           | 0.1% (0.1–0.2%)          |
|                                               | Percent (proportion)† | 7.7%                   | 17.6%                   | 40.7%                     | 29.0%                     | 5.0%                     |
| Iran                                          | Number                | 6260 (2860–9710)       | 15449 (9093–19605)      | 53229 (28058–64198)       | 40486 (20191–48599)       | 13122 (6010–16197)       |
|                                               | Percent (all-cause)*  | 0.4% (0.2–0.6%)        | 1.7% (0.9–2.3%)         | 0.6% (0.3–0.8%)           | 0.8% (0.4–1%)             | 0.4% (0.2–0.5%)          |
|                                               | Percent (proportion)† | 4.9%                   | 12.0%                   | 41.4%                     | 31.5%                     | 10.2%                    |
| Iraq                                          | Number                | 5605 (3193–9567)       | 14539 (10314–19146)     | 35031 (23857–48987)       | 20277 (13889–26806)       | 4413 (3312–5875)         |
|                                               | Percent (all-cause)*  | 0.4% (0.2–0.6%)        | 2% (1.4–2.7%)           | 0.8% (0.6–1%)             | 0.8% (0.6–1%)             | 0.4% (0.3–0.5%)          |
|                                               | Percent (proportion)† | 7.0%                   | 18.2%                   | 43.9%                     | 25.4%                     | 5.5%                     |
| Jordan                                        | Number                | 689 (447–997)          | 1910 (1401–2484)        | 3822 (2648–4824)          | 2697 (1799–3578)          | 620 (459–803)            |
|                                               | Percent (all-cause)*  | 0.2% (0.1–0.3%)        | 1.2% (0.8–1.6%)         | 0.4% (0.3–0.6%)           | 0.6% (0.4–0.7%)           | 0.2% (0.2–0.3%)          |
|                                               | Percent (proportion)† | 7.1%                   | 19.6%                   | 39.3%                     | 27.7%                     | 6.4%                     |
| Kuwait                                        | Number                | 198 (136–273)          | 321 (233–420)           | 1133 (768–1454)           | 674 (472–878)             | 152 (106–198)            |
|                                               | Percent (all-cause)*  | 0.3% (0.2–0.4%)        | 1% (0.7–1.4%)           | 0.3% (0.2–0.4%)           | 0.4% (0.3–0.5%)           | 0.2% (0.1–0.2%)          |
|                                               | Percent (proportion)† | 8.0%                   | 13.0%                   | 45.7%                     | 27.2%                     | 6.1%                     |
| Lebanon                                       | Number                | 309 (139–548)          | 717 (459–1009)          | 2427 (1611–3271)          | 1899 (1273–2585)          | 741 (546–1033)           |
|                                               | Percent (all-cause)*  | 0.3% (0.1–0.5%)        | 1.4% (0.9–2.1%)         | 0.5% (0.4–0.7%)           | 0.5% (0.4–0.7%)           | 0.2% (0.2–0.3%)          |
|                                               | Percent (proportion)† | 5.1%                   | 11.8%                   | 39.8%                     | 31.2%                     | 12.2%                    |
| Libya                                         | Number                | 413 (234–721)          | 881 (589–1187)          | 4260 (3049–5799)          | 2500 (1741–3396)          | 584 (416–876)            |
|                                               | Percent (all-cause)*  | 0.4% (0.2–0.6%)        | 1.1% (0.7–1.6%)         | 0.5% (0.4–0.7%)           | 0.6% (0.4–0.7%)           | 0.2% (0.2–0.4%)          |
|                                               | Percent (proportion)† | 4.8%                   | 10.2%                   | 49.3%                     | 28.9%                     | 6.8%                     |
| Morocco                                       | Number                | 1190 (562–2309)        | 3469 (1910–5235)        | 7639 (4552–12214)         | 6093 (4179–8091)          | 1224 (847–1762)          |
|                                               | Percent (all-cause)*  | 0.1% (0.1–0.2%)        | 0.8% (0.4–1.2%)         | 0.2% (0.1–0.3%)           | 0.2% (0.1–0.2%)           | 0.1% (0.0–0.1%)          |
|                                               | Percent (proportion)† | 6.1%                   | 17.7%                   | 38.9%                     | 31.1%                     | 6.2%                     |
| Palestine                                     | Number                | 845 (519–1329)         | 1757 (1272–2532)        | 3399 (2478–4175)          | 2261 (1636–2857)          | 641 (418–813)            |
|                                               | Percent (all-cause)*  | 0.5% (0.4–0.8%)        | 2.2% (1.5–3.2%)         | 0.9% (0.6–1.1%)           | 1% (0.7–1.2%)             | 0.5% (0.3–0.6%)          |
|                                               | Percent (proportion)† | 9.5%                   | 19.7%                   | 38.2%                     | 25.4%                     | 7.2%                     |
| Oman                                          | Number                | 197 (91–309)           | 356 (189–496)           | 1324 (766–1809)           | 533 (314–725)             | 109 (77–143)             |
|                                               | Percent (all-cause)*  | 0.2% (0.1–0.4%)        | 0.8% (0.4–1.2%)         | 0.3% (0.2–0.4%)           | 0.3% (0.2–0.4%)           | 0.1% (0.1–0.2%)          |
|                                               | Percent (proportion)† | 7.8%                   | 14.1%                   | 52.6%                     | 21.2%                     | 4.3%                     |
| Qatar                                         | Number                | 70 (39–113)            | 185 (126–252)           | 992 (630–1732)            | 397 (240–721)             | 49 (34–68)               |
|                                               | Percent (all-cause)*  | 0.3% (0.2–0.5%)        | 1.2% (0.8–1.7%)         | 0.3% (0.2–0.6%)           | 0.4% (0.3–0.7%)           | 0.3% (0.2–0.3%)          |
|                                               | Percent (proportion)† | 4.1%                   | 10.9%                   | 58.6%                     | 23.4%                     | 2.9%                     |
| Saudi Arabia                                  | Number                | 805 (412–1602)         | 1824 (1043–3341)        | 16766 (11626–26175)       | 6199 (4289–9998)          | 859 (591–1322)           |
|                                               | Percent (all-cause)*  | 0.3% (0.1–0.5%)        | 0.7% (0.4–1.4%)         | 0.3% (0.2–0.5%)           | 0.3% (0.2–0.5%)           | 0.2% (0.1–0.2%)          |
|                                               | Percent (proportion)† | 3.0%                   | 6.9%                    | 63.4%                     | 23.4%                     | 3.2%                     |
| Syrian Arab Republic                          | Number                | 875 (488–1641)         | 2739 (1925–4275)        | 6910 (4761–9542)          | 7846 (4919–11126)         | 2020 (1275–2715)         |
|                                               | Percent (all-cause)*  | 0.3% (0.2–0.5%)        | 1% (0.7–1.6%)           | 0.5% (0.4–0.7%)           | 0.6% (0.4–0.8%)           | 0.3% (0.2–0.4%)          |
|                                               | Percent (proportion)† | 4.3%                   | 13.4%                   | 33.9%                     | 38.5%                     | 9.9%                     |

**Table S24** Age-specific disability and death related to brain and central nervous system cancer in North Africa and Middle East countries in 2019

|                              |                       | <b>Under 5</b>     | <b>5-14 years</b>  | <b>15-49 years</b>  | <b>50-69 years</b>    | <b>70+ years</b>    |
|------------------------------|-----------------------|--------------------|--------------------|---------------------|-----------------------|---------------------|
|                              |                       | Mean (95% UI)      | Mean (95% UI)      | Mean (95% UI)       | Mean (95% UI)         | Mean (95% UI)       |
| Tunisia                      | Number                | 277 (146–474)      | 646 (396–948)      | 1898 (1206–2723)    | 1754 (1164–2494)      | 501 (353–719)       |
|                              | Percent (all-cause)*  | 0.1% (0.1–0.2%)    | 0.6% (0.4–0.9%)    | 0.2% (0.1–0.3%)     | 0.2% (0.1–0.2%)       | 0.1% (0.1–0.1%)     |
|                              | Percent (proportion)† | 5.5%               | 12.7%              | 37.4%               | 34.5%                 | 9.9%                |
| Türkiye                      | Number                | 6649 (3263–10195)  | 11584 (6213–15834) | 43344 (21287–61176) | 51708 (22740–75513)   | 19604 (8421–28454)  |
|                              | Percent (all-cause)*  | 0.4% (0.2–0.7%)    | 1.7% (0.9–2.5%)    | 0.7% (0.3–0.9%)     | 0.8% (0.4–1.2%)       | 0.4% (0.2–0.6%)     |
|                              | Percent (proportion)† | 5.0%               | 8.7%               | 32.6%               | 38.9%                 | 14.8%               |
| United Arab Emirates         | Number                | 281 (87–543)       | 777 (372–1169)     | 10090 (5608–15451)  | 3055 (1782–4515)      | 125 (84–182)        |
|                              | Percent (all-cause)*  | 0.8% (0.2–1.4%)    | 1.6% (0.7–2.5%)    | 0.7% (0.4–1%)       | 0.6% (0.4–0.8%)       | 0.3% (0.2–0.4%)     |
|                              | Percent (proportion)† | 2.0%               | 5.4%               | 70.4%               | 21.3%                 | 0.9%                |
| Yemen                        | Number                | 4507 (1592–7955)   | 8346 (5231–13393)  | 11370 (6189–17358)  | 5964 (3644–9275)      | 1413 (962–1965)     |
|                              | Percent (all-cause)*  | 0.1% (0–0.2%)      | 0.8% (0.5–1.2%)    | 0.3% (0.2–0.4%)     | 0.4% (0.3–0.6%)       | 0.2% (0.1–0.3%)     |
|                              | Percent (proportion)† | 14.3%              | 26.4%              | 36.0%               | 18.9%                 | 4.5%                |
| Afghanistan                  | Number                | 10535 (3360–20635) | 13591 (8082–21040) | 21247 (11025–43588) | 7649 (4397–15277)     | 1507 (1026–2405)    |
|                              | Percent (all-cause)*  | 0.1% (0–0.3%)      | 1.1% (0.6–1.6%)    | 0.4% (0.2–0.8%)     | 0.4% (0.2–0.7%)       | 0.2% (0.1–0.3%)     |
|                              | Percent (proportion)† | 19.3%              | 24.9%              | 39.0%               | 14.0%                 | 2.8%                |
| Sudan                        | Number                | 8845 (3064–16321)  | 12275 (7486–19108) | 17207 (9290–27678)  | 8032 (4832–12064)     | 2075 (1273–2902)    |
|                              | Percent (all-cause)*  | 0.2% (0.1–0.3%)    | 1.3% (0.8–1.9%)    | 0.4% (0.2–0.6%)     | 0.4% (0.3–0.6%)       | 0.2% (0.1–0.3%)     |
|                              | Percent (proportion)† | 18.3%              | 25.3%              | 35.5%               | 16.6%                 | 4.3%                |
| <b>Deaths</b>                |                       |                    |                    |                     |                       |                     |
| Global                       | Number                | 8530 (6414–10621)  | 11458 (9085–13291) | 55346 (43754–61463) | 100648 (77704–110636) | 70270 (47842–80009) |
|                              | Percent (all-cause)*  | 0.2% (0.1–0.2%)    | 1.7% (1.3–1.9%)    | 0.7% (0.6–0.8%)     | 0.7% (0.5–0.7%)       | 0.2% (0.2–0.3%)     |
|                              | Percent (proportion)† | 3.5%               | 4.7%               | 22.5%               | 40.9%                 | 28.5%               |
| North Africa and Middle East | Number                | 656 (423–886)      | 1389 (1018–1706)   | 5412 (3581–6623)    | 6650 (4499–7931)      | 3667 (2305–4369)    |
|                              | Percent (all-cause)*  | 0.2% (0.1–0.3%)    | 2.8% (2.1–3.3%)    | 1.1% (0.7–1.2%)     | 0.7% (0.5–0.8%)       | 0.3% (0.2–0.3%)     |
|                              | Percent (proportion)† | 3.7%               | 7.8%               | 30.4%               | 37.4%                 | 20.6%               |
| Algeria                      | Number                | 25 (12–42)         | 54 (28–80)         | 178 (110–240)       | 196 (126–260)         | 104 (74–137)        |
|                              | Percent (all-cause)*  | 0.1% (0.1–0.2%)    | 2.2% (1.1–3.1%)    | 0.6% (0.4–0.8%)     | 0.4% (0.3–0.5%)       | 0.1% (0.1–0.1%)     |
|                              | Percent (proportion)† | 4.5%               | 9.8%               | 32.0%               | 35.1%                 | 18.6%               |
| Bahrain                      | Number                | <0.1 (<0.1–<0.1)   | 1 (1–1)            | 10 (6–13)           | 12 (7–16)             | 3 (2–4)             |
|                              | Percent (all-cause)*  | 0.4% (0.2–0.5%)    | 3.3% (2.1–4.3%)    | 1.1% (0.7–1.4%)     | 0.7% (0.4–0.9%)       | 0.2% (0.1–0.2%)     |
|                              | Percent (proportion)† | 1.3%               | 4.3%               | 37.8%               | 45.5%                 | 11.1%               |
| Egypt                        | Number                | 78 (32–132)        | 196 (116–291)      | 673 (439–940)       | 845 (557–1320)        | 274 (148–553)       |
|                              | Percent (all-cause)*  | 0.2% (0.1–0.4%)    | 2.3% (1.4–3.4%)    | 0.9% (0.6–1.1%)     | 0.4% (0.3–0.6%)       | 0.1% (0.1–0.2%)     |
|                              | Percent (proportion)† | 3.8%               | 9.5%               | 32.6%               | 40.9%                 | 13.3%               |
| Iran                         | Number                | 71 (32–110)        | 191 (113–243)      | 998 (525–1203)      | 1341 (670–1607)       | 893 (411–1110)      |
|                              | Percent (all-cause)*  | 0.5% (0.2–0.7%)    | 4.4% (2.6–5.5%)    | 1.7% (0.9–2.1%)     | 1.3% (0.7–1.6%)       | 0.4% (0.2–0.5%)     |
|                              | Percent (proportion)† | 2.0%               | 5.5%               | 28.6%               | 38.4%                 | 25.6%               |
| Iraq                         | Number                | 64 (36–109)        | 181 (129–238)      | 655 (443–920)       | 661 (462–868)         | 282 (214–369)       |
|                              | Percent (all-cause)*  | 0.4% (0.3–0.6%)    | 4.9% (3.6–6.2%)    | 1.7% (1.3–2%)       | 1.2% (0.9–1.4%)       | 0.4% (0.3–0.5%)     |
|                              | Percent (proportion)† | 3.5%               | 9.8%               | 35.6%               | 35.9%                 | 15.3%               |
| Jordan                       | Number                | 8 (5–11)           | 24 (17–31)         | 70 (49–89)          | 87 (58–115)           | 39 (29–50)          |
|                              | Percent (all-cause)*  | 0.2% (0.2–0.3%)    | 3.4% (2.5–4.3%)    | 1.4% (1–1.7%)       | 0.9% (0.7–1.1%)       | 0.3% (0.2–0.4%)     |
|                              | Percent (proportion)† | 3.4%               | 10.3%              | 30.8%               | 38.2%                 | 17.2%               |
| Kuwait                       | Number                | 2 (2–3)            | 4 (3–5)            | 22 (15–28)          | 21 (15–28)            | 10 (7–13)           |
|                              | Percent (all-cause)*  | 0.4% (0.3–0.5%)    | 3.4% (2.6–4.4%)    | 1.1% (0.7–1.3%)     | 0.8% (0.6–0.9%)       | 0.2% (0.2–0.3%)     |
|                              | Percent (proportion)† | 3.7%               | 6.6%               | 36.5%               | 36.1%                 | 17.1%               |
| Lebanon                      | Number                | 3 (2–6)            | 9 (6–12)           | 45 (29–60)          | 63 (43–85)            | 48 (36–68)          |
|                              | Percent (all-cause)*  | 0.4% (0.2–0.6%)    | 5.3% (3.4–7.2%)    | 1.4% (1–1.8%)       | 0.8% (0.6–1%)         | 0.2% (0.2–0.3%)     |
|                              | Percent (proportion)† | 2.0%               | 5.2%               | 26.5%               | 37.5%                 | 28.8%               |
| Libya                        | Number                | 5 (3–8)            | 11 (7–15)          | 82 (58–112)         | 81 (57–108)           | 39 (28–57)          |
|                              | Percent (all-cause)*  | 0.4% (0.3–0.7%)    | 3% (2–3.9%)        | 1.1% (0.8–1.4%)     | 0.9% (0.7–1.1%)       | 0.3% (0.2–0.4%)     |
|                              | Percent (proportion)† | 2.2%               | 5.1%               | 37.7%               | 37.2%                 | 17.8%               |

**Table S24** Age-specific disability and death related to brain and central nervous system cancer in North Africa and Middle East countries in 2019

|                                           |                       | <b>Under 5</b>    | <b>5-14 years</b> | <b>15-49 years</b>  | <b>50-69 years</b>  | <b>70+ years</b>    |
|-------------------------------------------|-----------------------|-------------------|-------------------|---------------------|---------------------|---------------------|
|                                           |                       | Mean (95% UI)     | Mean (95% UI)     | Mean (95% UI)       | Mean (95% UI)       | Mean (95% UI)       |
| Morocco                                   | Number                | 14 (6–26)         | 43 (24–65)        | 143 (86–228)        | 201 (139–267)       | 78 (54–113)         |
|                                           | Percent (all-cause)*  | 0.1% (0.1–0.2%)   | 2.3% (1.3–3.3%)   | 0.5% (0.3–0.7%)     | 0.3% (0.2–0.3%)     | 0.1% (0.1–0.1%)     |
|                                           | Percent (proportion)† | 2.8%              | 9.0%              | 29.9%               | 42.0%               | 16.2%               |
| Palestine                                 | Number                | 10 (6–15)         | 22 (16–31)        | 63 (45–77)          | 74 (54–94)          | 41 (27–52)          |
|                                           | Percent (all-cause)*  | 0.6% (0.4–0.9%)   | 7.1% (5.2–9.9%)   | 2.8% (2.3–3.3%)     | 1.5% (1.1–1.7%)     | 0.6% (0.4–0.7%)     |
|                                           | Percent (proportion)† | 4.6%              | 10.4%             | 29.8%               | 35.5%               | 19.8%               |
| Oman                                      | Number                | 2 (1–3)           | 4 (2–6)           | 24 (14–33)          | 17 (10–23)          | 6 (5–8)             |
|                                           | Percent (all-cause)*  | 0.3% (0.1–0.4%)   | 2.3% (1.2–3.1%)   | 0.7% (0.4–0.9%)     | 0.5% (0.3–0.6%)     | 0.1% (0.1–0.2%)     |
|                                           | Percent (proportion)† | 4.1%              | 8.1%              | 44.2%               | 31.7%               | 11.9%               |
| Qatar                                     | Number                | 1 (0–1)           | 2 (2–3)           | 18 (11–32)          | 13 (8–23)           | 3 (2–4)             |
|                                           | Percent (all-cause)*  | 0.4% (0.2–0.6%)   | 3.8% (2.7–5.1%)   | 1.1% (0.8–1.8%)     | 0.8% (0.6–1.4%)     | 0.3% (0.2–0.4%)     |
|                                           | Percent (proportion)† | 2.1%              | 6.2%              | 49.5%               | 34.4%               | 7.8%                |
| Saudi Arabia                              | Number                | 9 (5–18)          | 23 (13–41)        | 317 (216–492)       | 195 (135–312)       | 53 (37–81)          |
|                                           | Percent (all-cause)*  | 0.3% (0.2–0.7%)   | 3% (1.8–5.3%)     | 0.6% (0.5–0.9%)     | 0.4% (0.3–0.7%)     | 0.2% (0.1–0.3%)     |
|                                           | Percent (proportion)† | 1.5%              | 3.8%              | 53.2%               | 32.6%               | 8.9%                |
| Syrian Arab Republic                      | Number                | 10 (6–19)         | 34 (24–54)        | 131 (88–180)        | 260 (164–369)       | 132 (82–177)        |
|                                           | Percent (all-cause)*  | 0.3% (0.2–0.6%)   | 2.6% (1.9–3.9%)   | 1.3% (1.1–5%)       | 0.9% (0.6–1%)       | 0.3% (0.2–0.4%)     |
|                                           | Percent (proportion)† | 1.8%              | 6.1%              | 23.1%               | 45.9%               | 23.2%               |
| Tunisia                                   | Number                | 3 (2–5)           | 8 (5–12)          | 36 (23–52)          | 58 (39–83)          | 32 (23–46)          |
|                                           | Percent (all-cause)*  | 0.2% (0.1–0.3%)   | 1.8% (1.1–2.5%)   | 0.5% (0.4–0.7%)     | 0.3% (0.2–0.4%)     | 0.1% (0.1–0.1%)     |
|                                           | Percent (proportion)† | 2.3%              | 5.8%              | 26.0%               | 42.4%               | 23.5%               |
| Türkiye                                   | Number                | 75 (37–115)       | 143 (77–196)      | 828 (400–1176)      | 1727 (766–2497)     | 1302 (559–1866)     |
|                                           | Percent (all-cause)*  | 0.5% (0.2–0.8%)   | 5.8% (3.2–7.7%)   | 2.3% (1.1–2.8%)     | 1.4% (0.7–1.8%)     | 0.5% (0.2–0.6%)     |
|                                           | Percent (proportion)† | 1.8%              | 3.5%              | 20.3%               | 42.4%               | 32.0%               |
| United Arab Emirates                      | Number                | 3 (1–6)           | 10 (5–15)         | 200 (111–308)       | 94 (55–138)         | 7 (5–11)            |
|                                           | Percent (all-cause)*  | 1.1% (0.3–2%)     | 6% (2.9–8.8%)     | 1.4% (0.8–1.9%)     | 0.8% (0.5–1.1%)     | 0.3% (0.2–0.4%)     |
|                                           | Percent (proportion)† | 1.0%              | 3.1%              | 63.8%               | 29.8%               | 2.3%                |
| Yemen                                     | Number                | 52 (18–91)        | 104 (65–167)      | 213 (115–329)       | 197 (121–306)       | 88 (61–121)         |
|                                           | Percent (all-cause)*  | 0.1% (0–0.2%)     | 1.5% (1–2.1%)     | 0.5% (0.3–0.8%)     | 0.5% (0.3–0.7%)     | 0.2% (0.1–0.3%)     |
|                                           | Percent (proportion)† | 7.9%              | 16.0%             | 32.5%               | 30.1%               | 13.5%               |
| Afghanistan                               | Number                | 121 (39–236)      | 170 (101–262)     | 392 (201–805)       | 238 (139–466)       | 94 (65–147)         |
|                                           | Percent (all-cause)*  | 0.1% (0.1–0.3%)   | 2% (1.2–2.9%)     | 0.6% (0.3–1.2%)     | 0.5% (0.3–0.9%)     | 0.2% (0.1–0.3%)     |
|                                           | Percent (proportion)† | 11.9%             | 16.7%             | 38.6%               | 23.4%               | 9.3%                |
| Sudan                                     | Number                | 101 (35–187)      | 153 (93–240)      | 311 (167–498)       | 263 (159–395)       | 133 (82–183)        |
|                                           | Percent (all-cause)*  | 0.2% (0.1–0.4%)   | 2.8% (1.8–3.9%)   | 0.8% (0.5–1.1%)     | 0.6% (0.4–0.8%)     | 0.2% (0.1–0.3%)     |
|                                           | Percent (proportion)† | 10.5%             | 15.9%             | 32.3%               | 27.3%               | 13.9%               |
| <b>YLDs (Years Lived with Disability)</b> |                       |                   |                   |                     |                     |                     |
| Global                                    | Number                | 7271 (4685–10127) | 8439 (5581–11431) | 43170 (28898–58560) | 44591 (29417–60309) | 25932 (15417–36287) |
|                                           | Percent (all-cause)*  | 0% (0–0%)         | 0% (0–0%)         | 0% (0–0%)           | 0% (0–0%)           | 0% (0–0%)           |
|                                           | Percent (proportion)† | 5.6%              | 6.5%              | 33.4%               | 34.5%               | 20.0%               |
| North Africa and Middle East              | Number                | 790 (445–1233)    | 1347 (817–1927)   | 4637 (2703–6616)    | 2816 (1609–3990)    | 1058 (574–1506)     |
|                                           | Percent (all-cause)*  | 0% (0–0%)         | 0% (0–0%)         | 0% (0–0%)           | 0% (0–0%)           | 0% (0–0%)           |
|                                           | Percent (proportion)† | 7.4%              | 12.6%             | 43.6%               | 26.4%               | 9.9%                |
| Algeria                                   | Number                | 38 (11–81)        | 60 (28–104)       | 154 (82–246)        | 80 (45–122)         | 30 (18–45)          |
|                                           | Percent (all-cause)*  | 0% (0–0.1%)       | 0% (0–0%)         | 0% (0–0%)           | 0% (0–0%)           | 0% (0–0%)           |
|                                           | Percent (proportion)† | 10.5%             | 16.6%             | 42.5%               | 22.1%               | 8.3%                |
| Bahrain                                   | Number                | 1 (0–1)           | 2 (1–3)           | 11 (6–17)           | 6 (3–10)            | 1 (1–2)             |
|                                           | Percent (all-cause)*  | 0% (0–0.1%)       | 0% (0–0%)         | 0% (0–0%)           | 0% (0–0%)           | 0% (0–0%)           |
|                                           | Percent (proportion)† | 3.5%              | 8.5%              | 53.3%               | 29.7%               | 4.9%                |
| Egypt                                     | Number                | 81 (32–150)       | 156 (79–260)      | 426 (242–639)       | 302 (171–497)       | 72 (34–154)         |
|                                           | Percent (all-cause)*  | 0% (0–0%)         | 0% (0–0%)         | 0% (0–0%)           | 0% (0–0%)           | 0% (0–0%)           |
|                                           | Percent (proportion)† | 7.8%              | 15.1%             | 41.0%               | 29.1%               | 7.0%                |



**Table S24** Age-specific disability and death related to brain and central nervous system cancer in North Africa and Middle East countries in 2019

|                      |                       | Under 5       | 5-14 years    | 15-49 years     | 50-69 years    | 70+ years     |
|----------------------|-----------------------|---------------|---------------|-----------------|----------------|---------------|
|                      |                       | Mean (95% UI) | Mean (95% UI) | Mean (95% UI)   | Mean (95% UI)  | Mean (95% UI) |
| Iran                 | Number                | 143 (53–269)  | 279 (138–444) | 1086 (500–1664) | 609 (282–916)  | 263 (108–397) |
|                      | Percent (all-cause)*  | 0·1% (0–0·1%) | 0% (0–0·1%)   | 0% (0–0%)       | 0% (0–0%)      | 0% (0–0%)     |
|                      | Percent (proportion)† | 6·0%          | 11·7%         | 45·6%           | 25·6%          | 11·0%         |
| Iraq                 | Number                | 80 (32–156)   | 170 (95–263)  | 473 (273–749)   | 243 (141–373)  | 68 (37–108)   |
|                      | Percent (all-cause)*  | 0% (0–0·1%)   | 0% (0–0·1%)   | 0% (0–0%)       | 0% (0–0%)      | 0% (0–0%)     |
|                      | Percent (proportion)† | 7·8%          | 16·4%         | 45·8%           | 23·5%          | 6·6%          |
| Jordan               | Number                | 14 (6–27)     | 32 (16–55)    | 75 (42–113)     | 40 (23–61)     | 13 (8–19)     |
|                      | Percent (all-cause)*  | 0% (0–0·1%)   | 0% (0–0%)     | 0% (0–0%)       | 0% (0–0%)      | 0% (0–0%)     |
|                      | Percent (proportion)† | 8·2%          | 18·2%         | 43·2%           | 23·1%          | 7·3%          |
| Kuwait               | Number                | 7 (3–13)      | 9 (5–15)      | 37 (21–58)      | 15 (9–23)      | 5 (3–8)       |
|                      | Percent (all-cause)*  | 0·1% (0–0·1%) | 0% (0–0·1%)   | 0% (0–0%)       | 0% (0–0%)      | 0% (0–0%)     |
|                      | Percent (proportion)† | 9·5%          | 12·2%         | 50·2%           | 20·8%          | 7·2%          |
| Lebanon              | Number                | 10 (3–23)     | 19 (9–33)     | 76 (43–120)     | 39 (22–59)     | 20 (11–32)    |
|                      | Percent (all-cause)*  | 0·1% (0–0·1%) | 0·1% (0–0·1%) | 0% (0–0%)       | 0% (0–0%)      | 0% (0–0%)     |
|                      | Percent (proportion)† | 6·3%          | 11·5%         | 46·3%           | 23·4%          | 12·4%         |
| Libya                | Number                | 6 (2–12)      | 11 (5–18)     | 60 (36–90)      | 32 (19–49)     | 11 (6–17)     |
|                      | Percent (all-cause)*  | 0% (0–0·1%)   | 0% (0–0%)     | 0% (0–0%)       | 0% (0–0%)      | 0% (0–0%)     |
|                      | Percent (proportion)† | 5·2%          | 9·1%          | 49·9%           | 26·6%          | 9·1%          |
| Morocco              | Number                | 13 (5–28)     | 33 (16–56)    | 83 (46–140)     | 69 (42–101)    | 19 (12–30)    |
|                      | Percent (all-cause)*  | 0% (0–0%)     | 0% (0–0%)     | 0% (0–0%)       | 0% (0–0%)      | 0% (0–0%)     |
|                      | Percent (proportion)† | 6·0%          | 15·1%         | 38·2%           | 31·8%          | 8·9%          |
| Palestine            | Number                | 13 (6–24)     | 21 (12–35)    | 49 (30–70)      | 28 (18–40)     | 10 (5–15)     |
|                      | Percent (all-cause)*  | 0·1% (0–0·1%) | 0% (0–0·1%)   | 0% (0–0%)       | 0% (0–0%)      | 0% (0–0·1%)   |
|                      | Percent (proportion)† | 10·6%         | 17·7%         | 40·6%           | 22·9%          | 8·2%          |
| Oman                 | Number                | 5 (2–10)      | 8 (3–14)      | 35 (17–57)      | 9 (5–15)       | 2 (1–4)       |
|                      | Percent (all-cause)*  | 0% (0–0·1%)   | 0% (0–0%)     | 0% (0–0%)       | 0% (0–0%)      | 0% (0–0%)     |
|                      | Percent (proportion)† | 8·4%          | 12·7%         | 58·8%           | 15·9%          | 4·2%          |
| Qatar                | Number                | 2 (1–5)       | 5 (2–8)       | 32 (17–61)      | 9 (4–17)       | 1 (1–2)       |
|                      | Percent (all-cause)*  | 0·1% (0–0·1%) | 0% (0–0·1%)   | 0% (0–0%)       | 0% (0–0%)      | 0% (0–0%)     |
|                      | Percent (proportion)† | 4·7%          | 9·7%          | 65·7%           | 17·3%          | 2·6%          |
| Saudi Arabia         | Number                | 18 (6–39)     | 37 (16–75)    | 425 (246–703)   | 117 (68–194)   | 23 (14–38)    |
|                      | Percent (all-cause)*  | 0% (0–0·1%)   | 0% (0–0%)     | 0% (0–0%)       | 0% (0–0%)      | 0% (0–0%)     |
|                      | Percent (proportion)† | 2·8%          | 6·0%          | 68·6%           | 18·9%          | 3·8%          |
| Syrian Arab Republic | Number                | 14 (5–29)     | 38 (19–66)    | 103 (61–161)    | 104 (59–163)   | 34 (17–53)    |
|                      | Percent (all-cause)*  | 0% (0–0·1%)   | 0% (0–0%)     | 0% (0–0%)       | 0% (0–0%)      | 0% (0–0%)     |
|                      | Percent (proportion)† | 4·7%          | 12·9%         | 35·3%           | 35·7%          | 11·5%         |
| Tunisia              | Number                | 6 (2–14)      | 12 (6–22)     | 41 (23–65)      | 28 (16–44)     | 11 (7–17)     |
|                      | Percent (all-cause)*  | 0% (0–0·1%)   | 0% (0–0%)     | 0% (0–0%)       | 0% (0–0%)      | 0% (0–0%)     |
|                      | Percent (proportion)† | 6·6%          | 12·4%         | 41·5%           | 28·4%          | 11·2%         |
| Türkiye              | Number                | 156 (61–298)  | 216 (98–372)  | 926 (396–1514)  | 823 (322–1431) | 397 (147–682) |
|                      | Percent (all-cause)*  | 0·1% (0–0·2%) | 0% (0–0·1%)   | 0% (0–0%)       | 0% (0–0·1%)    | 0% (0–0%)     |
|                      | Percent (proportion)† | 6·2%          | 8·6%          | 36·8%           | 32·7%          | 15·8%         |
| United Arab Emirates | Number                | 4 (1–9)       | 9 (3–17)      | 127 (62–227)    | 38 (19–61)     | 2 (1–3)       |
|                      | Percent (all-cause)*  | 0% (0–0·1%)   | 0% (0–0%)     | 0% (0–0%)       | 0% (0–0%)      | 0% (0–0%)     |
|                      | Percent (proportion)† | 2·1%          | 5·0%          | 70·7%           | 21·0%          | 1·2%          |
| Yemen                | Number                | 36 (12–70)    | 58 (31–98)    | 95 (48–158)     | 63 (35–104)    | 21 (12–32)    |
|                      | Percent (all-cause)*  | 0% (0–0%)     | 0% (0–0%)     | 0% (0–0%)       | 0% (0–0%)      | 0% (0–0%)     |
|                      | Percent (proportion)† | 13·1%         | 21·3%         | 34·9%           | 23·0%          | 7·7%          |
| Afghanistan          | Number                | 64 (20–139)   | 77 (41–126)   | 152 (74–324)    | 72 (37–148)    | 21 (12–36)    |
|                      | Percent (all-cause)*  | 0% (0–0%)     | 0% (0–0%)     | 0% (0–0%)       | 0% (0–0%)      | 0% (0–0%)     |
|                      | Percent (proportion)† | 16·6%         | 19·9%         | 39·4%           | 18·7%          | 5·5%          |
| Sudan                | Number                | 77 (23–153)   | 95 (51–159)   | 167 (79–277)    | 87 (47–142)    | 32 (17–49)    |

**Table S24** Age-specific disability and death related to brain and central nervous system cancer in North Africa and Middle East countries in 2019

|                                  |                       | Under 5                | 5-14 years              | 15-49 years               | 50-69 years               | 70+ years                |
|----------------------------------|-----------------------|------------------------|-------------------------|---------------------------|---------------------------|--------------------------|
|                                  |                       | Mean (95% UI)          | Mean (95% UI)           | Mean (95% UI)             | Mean (95% UI)             | Mean (95% UI)            |
|                                  | Percent (all-cause)*  | 0% (0-0.1%)            | 0% (0-0%)               | 0% (0-0%)                 | 0% (0-0%)                 | 0% (0-0%)                |
|                                  | Percent (proportion)† | 16.8%                  | 20.8%                   | 36.5%                     | 19.0%                     | 6.9%                     |
| <b>YLLs (Years of Life Lost)</b> |                       |                        |                         |                           |                           |                          |
| Global                           | Number                | 740670 (556696-922051) | 910051 (722163-1055945) | 2874614 (2273181-3192868) | 2967981 (2304922-3262153) | 1037151 (715526-1173210) |
|                                  | Percent (all-cause)*  | 0.2% (0.1-0.2%)        | 1.7% (1.3-1.9%)         | 0.7% (0.6-0.8%)           | 0.7% (0.5-0.7%)           | 0.3% (0.2-0.3%)          |
|                                  | Percent (proportion)† | 8.7%                   | 10.7%                   | 33.7%                     | 34.8%                     | 12.2%                    |
| North Africa and Middle East     | Number                | 56877 (36593-76844)    | 110318 (80896-135517)   | 284011 (187954-346971)    | 199553 (135342-238528)    | 54865 (34878-65147)      |
|                                  | Percent (all-cause)*  | 0.2% (0.1-0.3%)        | 2.8% (2.1-3.3%)         | 1% (0.7-1.2%)             | 0.8% (0.5-0.9%)           | 0.3% (0.2-0.4%)          |
|                                  | Percent (proportion)† | 8.1%                   | 15.6%                   | 40.2%                     | 28.3%                     | 7.8%                     |
| Algeria                          | Number                | 2171 (1023-3681)       | 4323 (2239-6344)        | 9407 (5785-12617)         | 5867 (3789-7814)          | 1544 (1084-2047)         |
|                                  | Percent (all-cause)*  | 0.1% (0.1-0.2%)        | 2.2% (1.2-3.1%)         | 0.6% (0.4-0.8%)           | 0.4% (0.3-0.5%)           | 0.1% (0.1-0.2%)          |
|                                  | Percent (proportion)† | 9.3%                   | 18.5%                   | 40.4%                     | 25.2%                     | 6.6%                     |
| Bahrain                          | Number                | 29 (18-42)             | 87 (55-115)             | 488 (292-658)             | 352 (205-501)             | 45 (32-61)               |
|                                  | Percent (all-cause)*  | 0.4% (0.2-0.5%)        | 3.3% (2.1-4.3%)         | 1.1% (0.7-1.4%)           | 0.7% (0.4-0.9%)           | 0.2% (0.1-0.3%)          |
|                                  | Percent (proportion)† | 2.9%                   | 8.7%                    | 48.7%                     | 35.2%                     | 4.5%                     |
| Egypt                            | Number                | 6738 (2802-11446)      | 15558 (9162-23066)      | 35780 (23235-49811)       | 25530 (16799-39727)       | 4413 (2419-8808)         |
|                                  | Percent (all-cause)*  | 0.2% (0.1-0.4%)        | 2.4% (1.4-3.4%)         | 0.9% (0.6-1.1%)           | 0.4% (0.3-0.6%)           | 0.1% (0.1-0.3%)          |
|                                  | Percent (proportion)† | 7.7%                   | 17.7%                   | 40.6%                     | 29.0%                     | 5.0%                     |
| Iran                             | Number                | 6117 (2786-9524)       | 15170 (8930-19284)      | 52143 (27444-62859)       | 39877 (19954-47862)       | 12860 (5884-15928)       |
|                                  | Percent (all-cause)*  | 0.5% (0.2-0.7%)        | 4.4% (2.6-5.5%)         | 1.7% (0.9-2%)             | 1.4% (0.7-1.6%)           | 0.5% (0.2-0.6%)          |
|                                  | Percent (proportion)† | 4.8%                   | 12.0%                   | 41.3%                     | 31.6%                     | 10.2%                    |
| Iraq                             | Number                | 5525 (3152-9438)       | 14369 (10200-18940)     | 34558 (23544-48290)       | 20035 (13703-26418)       | 4345 (3269-5801)         |
|                                  | Percent (all-cause)*  | 0.4% (0.3-0.6%)        | 4.9% (3.5-6.2%)         | 1.7% (1.3-1.9%)           | 1.2% (1-1.4%)             | 0.5% (0.4-0.6%)          |
|                                  | Percent (proportion)† | 7.0%                   | 18.2%                   | 43.8%                     | 25.4%                     | 5.5%                     |
| Jordan                           | Number                | 674 (438-975)          | 1878 (1380-2432)        | 3747 (2588-4722)          | 2657 (1770-3525)          | 607 (450-790)            |
|                                  | Percent (all-cause)*  | 0.2% (0.2-0.3%)        | 3.4% (2.5-4.2%)         | 1.5% (1-1.7%)             | 1% (0.7-1.2%)             | 0.3% (0.3-0.4%)          |
|                                  | Percent (proportion)† | 7.1%                   | 19.6%                   | 39.2%                     | 27.8%                     | 6.4%                     |
| Kuwait                           | Number                | 191 (131-264)          | 312 (227-409)           | 1096 (745-1405)           | 659 (462-859)             | 147 (102-191)            |
|                                  | Percent (all-cause)*  | 0.4% (0.3-0.5%)        | 3.5% (2.6-4.4%)         | 1.1% (0.7-1.3%)           | 0.8% (0.6-1%)             | 0.3% (0.2-0.3%)          |
|                                  | Percent (proportion)† | 7.9%                   | 13.0%                   | 45.6%                     | 27.4%                     | 6.1%                     |
| Lebanon                          | Number                | 299 (134-530)          | 698 (444-980)           | 2351 (1560-3169)          | 1860 (1249-2536)          | 721 (529-1007)           |
|                                  | Percent (all-cause)*  | 0.3% (0.2-0.6%)        | 5.3% (3.4-7.2%)         | 1.4% (1-1.8%)             | 0.8% (0.6-1.1%)           | 0.3% (0.2-0.4%)          |
|                                  | Percent (proportion)† | 5.0%                   | 11.8%                   | 39.7%                     | 31.4%                     | 12.2%                    |
| Libya                            | Number                | 407 (230-709)          | 870 (582-1175)          | 4200 (2999-5712)          | 2469 (1714-3344)          | 574 (409-859)            |
|                                  | Percent (all-cause)*  | 0.4% (0.3-0.7%)        | 3% (2.1-3.9%)           | 1.1% (0.8-1.4%)           | 0.9% (0.7-1.2%)           | 0.3% (0.3-0.5%)          |
|                                  | Percent (proportion)† | 4.8%                   | 10.2%                   | 49.3%                     | 29.0%                     | 6.7%                     |
| Morocco                          | Number                | 1177 (556-2286)        | 3436 (1898-5190)        | 7556 (4497-12095)         | 6024 (4130-7994)          | 1204 (836-1736)          |
|                                  | Percent (all-cause)*  | 0.1% (0.1-0.2%)        | 2.3% (1.3-3.3%)         | 0.5% (0.3-0.7%)           | 0.3% (0.2-0.3%)           | 0.1% (0.1-0.1%)          |
|                                  | Percent (proportion)† | 6.1%                   | 17.7%                   | 39.0%                     | 31.1%                     | 6.2%                     |
| Palestine                        | Number                | 832 (512-1306)         | 1735 (1260-2498)        | 3350 (2437-4123)          | 2234 (1617-2827)          | 631 (412-801)            |
|                                  | Percent (all-cause)*  | 0.6% (0.4-0.9%)        | 7.1% (5.2-10%)          | 2.7% (2-3.3%)             | 1.5% (1.2-1.8%)           | 0.6% (0.4-0.8%)          |
|                                  | Percent (proportion)† | 9.5%                   | 19.8%                   | 38.1%                     | 25.4%                     | 7.2%                     |
| Oman                             | Number                | 192 (89-299)           | 348 (185-484)           | 1290 (746-1765)           | 524 (309-710)             | 106 (75-140)             |
|                                  | Percent (all-cause)*  | 0.3% (0.1-0.4%)        | 2.3% (1.2-3.1%)         | 0.7% (0.4-0.9%)           | 0.5% (0.3-0.7%)           | 0.2% (0.1-0.2%)          |
|                                  | Percent (proportion)† | 7.8%                   | 14.2%                   | 52.4%                     | 21.3%                     | 4.3%                     |
| Qatar                            | Number                | 68 (38-109)            | 180 (123-245)           | 959 (610-1681)            | 388 (235-704)             | 47 (33-66)               |
|                                  | Percent (all-cause)*  | 0.4% (0.2-0.6%)        | 3.9% (2.7-5.1%)         | 1% (0.7-1.7%)             | 0.9% (0.6-1.4%)           | 0.3% (0.2-0.4%)          |
|                                  | Percent (proportion)† | 4.1%                   | 11.0%                   | 58.4%                     | 23.6%                     | 2.9%                     |
| Saudi Arabia                     | Number                | 787 (405-1557)         | 1787 (1019-3265)        | 16341 (11286-25445)       | 6082 (4209-9803)          | 836 (574-1288)           |
|                                  | Percent (all-cause)*  | 0.3% (0.2-0.6%)        | 3% (1.8-5.4%)           | 0.6% (0.5-0.9%)           | 0.4% (0.3-0.7%)           | 0.2% (0.1-0.3%)          |
|                                  | Percent (proportion)† | 3.0%                   | 6.9%                    | 63.3%                     | 23.5%                     | 3.2%                     |

**Table S24** Age-specific disability and death related to brain and central nervous system cancer in North Africa and Middle East countries in 2019

|                      |                       | <b>Under 5</b>     | <b>5-14 years</b>  | <b>15-49 years</b>  | <b>50-69 years</b>  | <b>70+ years</b>   |
|----------------------|-----------------------|--------------------|--------------------|---------------------|---------------------|--------------------|
|                      |                       | Mean (95% UI)      | Mean (95% UI)      | Mean (95% UI)       | Mean (95% UI)       | Mean (95% UI)      |
| Syrian Arab Republic | Number                | 861 (481–1613)     | 2702 (1902–4219)   | 6807 (4676–9396)    | 7742 (4858–10981)   | 1986 (1255–2672)   |
|                      | Percent (all-cause)*  | 0.3% (0.2–0.5%)    | 2.6% (1.9–4%)      | 1.3% (1.1–5%)       | 0.9% (0.6–1.1%)     | 0.4% (0.2–0.5%)    |
|                      | Percent (proportion)† | 4.3%               | 13.4%              | 33.9%               | 38.5%               | 9.9%               |
| Tunisia              | Number                | 271 (144–461)      | 634 (388–931)      | 1857 (1178–2669)    | 1726 (1142–2461)    | 490 (346–702)      |
|                      | Percent (all-cause)*  | 0.2% (0.1–0.3%)    | 1.8% (1.2–2.5%)    | 0.5% (0.4–0.6%)     | 0.3% (0.2–0.4%)     | 0.1% (0.1–0.1%)    |
|                      | Percent (proportion)† | 5.4%               | 12.7%              | 37.3%               | 34.7%               | 9.8%               |
| Türkiye              | Number                | 6493 (3196–9970)   | 11368 (6120–15571) | 42418 (20788–59783) | 50885 (22387–73857) | 19207 (8243–27843) |
|                      | Percent (all-cause)*  | 0.5% (0.2–0.7%)    | 5.8% (3.2–7.7%)    | 2.3% (1.2–2.8%)     | 1.5% (0.7–1.9%)     | 0.6% (0.3–0.8%)    |
|                      | Percent (proportion)† | 5.0%               | 8.7%               | 32.5%               | 39.0%               | 14.7%              |
| United Arab Emirates | Number                | 277 (86–537)       | 768 (368–1156)     | 9963 (5554–15230)   | 3017 (1764–4469)    | 123 (82–179)       |
|                      | Percent (all-cause)*  | 1.1% (0.3–2%)      | 6% (2.9–8.9%)      | 1.4% (0.8–1.9%)     | 0.8% (0.5–1.1%)     | 0.3% (0.2–0.5%)    |
|                      | Percent (proportion)† | 2.0%               | 5.4%               | 70.4%               | 21.3%               | 0.9%               |
| Yemen                | Number                | 4471 (1579–7893)   | 8288 (5196–13280)  | 11275 (6122–17217)  | 5902 (3606–9189)    | 1392 (949–1935)    |
|                      | Percent (all-cause)*  | 0.1% (0–0.2%)      | 1.5% (1.2–1%)      | 0.5% (0.3–0.7%)     | 0.5% (0.3–0.8%)     | 0.2% (0.2–0.3%)    |
|                      | Percent (proportion)† | 14.3%              | 26.5%              | 36.0%               | 18.8%               | 4.4%               |
| Afghanistan          | Number                | 10471 (3340–20487) | 13514 (8038–20910) | 21095 (10942–43267) | 7577 (4351–15140)   | 1486 (1013–2371)   |
|                      | Percent (all-cause)*  | 0.1% (0–0.3%)      | 2% (1.2–2.9%)      | 0.6% (0.3–1.2%)     | 0.5% (0.3–0.9%)     | 0.2% (0.1–0.3%)    |
|                      | Percent (proportion)† | 19.3%              | 25.0%              | 39.0%               | 14.0%               | 2.7%               |
| Sudan                | Number                | 8768 (3041–16196)  | 12179 (7425–18949) | 17040 (9192–27379)  | 7945 (4774–11965)   | 2044 (1249–2851)   |
|                      | Percent (all-cause)*  | 0.2% (0.1–0.3%)    | 2.8% (1.8–3.9%)    | 0.9% (0.5–1.1%)     | 0.6% (0.4–0.8%)     | 0.2% (0.1–0.3%)    |
|                      | Percent (proportion)† | 18.3%              | 25.4%              | 35.5%               | 16.6%               | 4.3%               |

DALYs, Disability-Adjusted Life Years; NC, neurological condition; UI, uncertainty interval; YLDs, Years Lived with Disability; YLLs, Years of Life Lost. Count data are absolute numbers and percentage data are rounded to one decimal place. Percentages and number of DALYs, deaths, YLDs, and YLLs are not mutually exclusive: the sum of percentages and number of DALYs, deaths, YLDs, and YLLs in the columns exceeds the totals for all causes combined because of overlap between various causes. Measures with insufficient data are not reported here. \*Percent of all-cause indicates the proportion of the specified measure (ie, DALYs, deaths, YDLs, or YLLs) of brain and central nervous system cancer out of all causes in the age-group in the region/nation. † Percent proportion indicates the share of the specified measure (ie, DALYs, deaths, YDLs, or YLLs) of brain and central nervous system cancer in different age-groups in the region/nation. Data in parentheses are 95% uncertainty intervals.

***Table S25 Age-specific disability and death related to idiopathic epilepsy in North Africa and Middle East countries in 2019***  
(NEXT PAGE)

**Table S25** Age-specific disability and death related to idiopathic epilepsy in North Africa and Middle East countries in 2019

|                                               |                       | <b>Under 5</b>            | <b>5-14 years</b>         | <b>15-49 years</b>        | <b>50-69 years</b>        | <b>70+ years</b>        |
|-----------------------------------------------|-----------------------|---------------------------|---------------------------|---------------------------|---------------------------|-------------------------|
|                                               |                       | Mean (95% UI)             | Mean (95% UI)             | Mean (95% UI)             | Mean (95% UI)             | Mean (95% UI)           |
| <b>DALYs (Disability-Adjusted Life Years)</b> |                       |                           |                           |                           |                           |                         |
| Global                                        | Number                | 1364826 (1047194–1772052) | 2156722 (1466090–3125087) | 6704468 (5204772–8628445) | 1914325 (1428454–2520572) | 937283 (676978–1263079) |
|                                               | Percent (all-cause)*  | 0.3% (0.2–0.4%)           | 1.8% (1.3–2.6%)           | 0.9% (0.7–1.1%)           | 0.3% (0.2–0.4%)           | 0.2% (0.1–0.3%)         |
|                                               | Percent (proportion)† | 10.4%                     | 16.5%                     | 51.3%                     | 14.6%                     | 7.2%                    |
| North Africa and Middle East                  | Number                | 137368 (89438–184303)     | 199297 (130894–304430)    | 482917 (346712–656307)    | 98174 (65064–142742)      | 37516 (23994–55668)     |
|                                               | Percent (all-cause)*  | 0.5% (0.3–0.6%)           | 2.1% (1.5–3.1%)           | 0.8% (0.6–1%)             | 0.2% (0.2–0.3%)           | 0.2% (0.1–0.2%)         |
|                                               | Percent (proportion)† | 14.4%                     | 20.9%                     | 50.6%                     | 10.3%                     | 3.9%                    |
| Algeria                                       | Number                | 8729 (4272–15247)         | 12766 (5377–25124)        | 30010 (15343–48513)       | 6378 (2727–11527)         | 2600 (1008–4846)        |
|                                               | Percent (all-cause)*  | 0.5% (0.3–0.9%)           | 2.5% (1.1–4.7%)           | 0.8% (0.4–1.3%)           | 0.3% (0.1–0.5%)           | 0.2% (0.1–0.3%)         |
|                                               | Percent (proportion)† | 14.4%                     | 21.1%                     | 49.6%                     | 10.5%                     | 4.3%                    |
| Bahrain                                       | Number                | 124 (53–230)              | 296 (102–606)             | 1427 (710–2467)           | 401 (175–731)             | 86 (42–149)             |
|                                               | Percent (all-cause)*  | 1.3% (0.5–2.3%)           | 3% (1.1–5.9%)             | 1% (0.5–1.7%)             | 0.4% (0.2–0.8%)           | 0.3% (0.1–0.5%)         |
|                                               | Percent (proportion)† | 5.3%                      | 12.7%                     | 61.1%                     | 17.2%                     | 3.7%                    |
| Egypt                                         | Number                | 16880 (5187–32442)        | 30125 (9731–59992)        | 51201 (22975–91784)       | 10514 (4019–19608)        | 2932 (939–5747)         |
|                                               | Percent (all-cause)*  | 0.5% (0.2–1%)             | 1.8% (0.6–3.5%)           | 0.6% (0.3–1%)             | 0.1% (0–0.2%)             | 0.1% (0–0.2%)           |
|                                               | Percent (proportion)† | 15.1%                     | 27.0%                     | 45.9%                     | 9.4%                      | 2.6%                    |
| Iran                                          | Number                | 12387 (7814–18301)        | 23476 (14600–36465)       | 57873 (40588–79619)       | 13759 (9118–20298)        | 5773 (3710–8560)        |
|                                               | Percent (all-cause)*  | 0.8% (0.5–1.2%)           | 2.5% (1.6–3.7%)           | 0.7% (0.5–0.9%)           | 0.3% (0.2–0.4%)           | 0.2% (0.1–0.2%)         |
|                                               | Percent (proportion)† | 10.9%                     | 20.7%                     | 51.1%                     | 12.1%                     | 5.1%                    |
| Iraq                                          | Number                | 7067 (2811–13302)         | 13907 (5022–27159)        | 29550 (14181–52668)       | 4479 (2047–8069)          | 1261 (467–2383)         |
|                                               | Percent (all-cause)*  | 0.5% (0.2–0.9%)           | 1.9% (0.7–3.6%)           | 0.7% (0.3–1.1%)           | 0.2% (0.1–0.3%)           | 0.1% (0–0.2%)           |
|                                               | Percent (proportion)† | 12.6%                     | 24.7%                     | 52.5%                     | 8.0%                      | 2.2%                    |
| Jordan                                        | Number                | 1777 (690–3540)           | 3763 (1314–7862)          | 7067 (3238–13097)         | 1200 (539–2241)           | 330 (116–646)           |
|                                               | Percent (all-cause)*  | 0.5% (0.2–1%)             | 2.3% (0.8–4.6%)           | 0.8% (0.4–1.5%)           | 0.2% (0.1–0.5%)           | 0.1% (0–0.3%)           |
|                                               | Percent (proportion)† | 12.6%                     | 26.6%                     | 50.0%                     | 8.5%                      | 2.3%                    |
| Kuwait                                        | Number                | 495 (203–996)             | 1044 (429–2152)           | 3235 (1446–6096)          | 557 (215–1164)            | 173 (66–338)            |
|                                               | Percent (all-cause)*  | 0.9% (0.4–1.7%)           | 3.1% (1.3–6.1%)           | 0.8% (0.3–1.4%)           | 0.3% (0.1–0.6%)           | 0.2% (0.1–0.4%)         |
|                                               | Percent (proportion)† | 9.0%                      | 19.0%                     | 58.8%                     | 10.1%                     | 3.1%                    |
| Lebanon                                       | Number                | 789 (332–1485)            | 1316 (456–2685)           | 3353 (1737–5901)          | 824 (379–1554)            | 504 (204–992)           |
|                                               | Percent (all-cause)*  | 0.8% (0.3–1.5%)           | 2.6% (0.9–5.4%)           | 0.7% (0.4–1.3%)           | 0.2% (0.1–0.4%)           | 0.1% (0.1–0.3%)         |
|                                               | Percent (proportion)† | 11.6%                     | 19.4%                     | 49.4%                     | 12.1%                     | 7.4%                    |
| Libya                                         | Number                | 805 (413–1282)            | 1479 (627–2775)           | 5652 (3254–8976)          | 1017 (550–1697)           | 361 (174–615)           |
|                                               | Percent (all-cause)*  | 0.7% (0.4–1.1%)           | 1.9% (0.8–3.4%)           | 0.7% (0.4–1%)             | 0.2% (0.1–0.4%)           | 0.2% (0.1–0.3%)         |
|                                               | Percent (proportion)† | 8.6%                      | 15.9%                     | 60.7%                     | 10.9%                     | 3.9%                    |
| Morocco                                       | Number                | 4666 (1316–9652)          | 10150 (3062–20505)        | 24359 (9444–45833)        | 6481 (2403–12801)         | 2248 (740–4441)         |
|                                               | Percent (all-cause)*  | 0.4% (0.1–0.9%)           | 2.3% (0.7–4.5%)           | 0.7% (0.3–1.3%)           | 0.2% (0.1–0.4%)           | 0.1% (0–0.2%)           |
|                                               | Percent (proportion)† | 9.7%                      | 21.2%                     | 50.8%                     | 13.5%                     | 4.7%                    |
| Palestine                                     | Number                | 1107 (556–1860)           | 2024 (816–3732)           | 4286 (2591–6594)          | 634 (363–1006)            | 181 (92–300)            |
|                                               | Percent (all-cause)*  | 0.7% (0.4–1.2%)           | 2.5% (1.1–4.4%)           | 1.1% (0.7–1.6%)           | 0.3% (0.2–0.4%)           | 0.1% (0.1–0.2%)         |
|                                               | Percent (proportion)† | 13.4%                     | 24.6%                     | 52.1%                     | 7.7%                      | 2.2%                    |
| Oman                                          | Number                | 528 (159–1137)            | 882 (253–1965)            | 2737 (985–5350)           | 320 (116–657)             | 77 (27–150)             |
|                                               | Percent (all-cause)*  | 0.6% (0.2–1.3%)           | 2% (0.6–4.1%)             | 0.6% (0.2–1.1%)           | 0.2% (0.1–0.4%)           | 0.1% (0–0.2%)           |
|                                               | Percent (proportion)† | 11.6%                     | 19.4%                     | 60.2%                     | 7.1%                      | 1.7%                    |
| Qatar                                         | Number                | 209 (70–432)              | 417 (140–903)             | 2216 (873–4383)           | 278 (96–573)              | 27 (9–55)               |
|                                               | Percent (all-cause)*  | 0.9% (0.3–2%)             | 2.7% (0.9–5.6%)           | 0.7% (0.3–1.4%)           | 0.3% (0.1–0.6%)           | 0.1% (0–0.3%)           |
|                                               | Percent (proportion)† | 6.6%                      | 13.2%                     | 70.4%                     | 8.8%                      | 0.9%                    |
| Saudi Arabia                                  | Number                | 3533 (1120–7210)          | 8788 (3028–18599)         | 58855 (31146–95966)       | 8587 (4130–14758)         | 1593 (685–2784)         |
|                                               | Percent (all-cause)*  | 1.2% (0.4–2.5%)           | 3.4% (1.2–7%)             | 1.1% (0.6–1.8%)           | 0.4% (0.2–0.7%)           | 0.3% (0.1–0.5%)         |
|                                               | Percent (proportion)† | 4.3%                      | 10.8%                     | 72.3%                     | 10.6%                     | 2.0%                    |
| Syrian Arab Republic                          | Number                | 1621 (539–3183)           | 3845 (1161–8056)          | 7893 (3723–13948)         | 1967 (902–3646)           | 547 (213–1030)          |
|                                               | Percent (all-cause)*  | 0.5% (0.2–1%)             | 1.4% (0.4–2.9%)           | 0.6% (0.3–1%)             | 0.2% (0.1–0.3%)           | 0.1% (0–0.2%)           |
|                                               | Percent (proportion)† | 10.2%                     | 24.2%                     | 49.7%                     | 12.4%                     | 3.4%                    |

**Table S25** Age-specific disability and death related to idiopathic epilepsy in North Africa and Middle East countries in 2019

|                              |                       | <b>Under 5</b>      | <b>5-14 years</b>   | <b>15-49 years</b>   | <b>50-69 years</b>  | <b>70+ years</b>    |
|------------------------------|-----------------------|---------------------|---------------------|----------------------|---------------------|---------------------|
|                              |                       | Mean (95% UI)       | Mean (95% UI)       | Mean (95% UI)        | Mean (95% UI)       | Mean (95% UI)       |
| Tunisia                      | Number                | 1407 (659–2488)     | 2522 (1003–4984)    | 6485 (3381–11223)    | 2002 (897–3687)     | 930 (381–1737)      |
|                              | Percent (all-cause)*  | 0.7% (0.4–1.3%)     | 2.3% (1.4–4%)       | 0.7% (0.3–1.1%)      | 0.2% (0.1–0.4%)     | 0.1% (0.1–0.3%)     |
|                              | Percent (proportion)† | 10.5%               | 18.9%               | 48.6%                | 15.0%               | 7.0%                |
| Türkiye                      | Number                | 19283 (11282–29061) | 24816 (10917–45215) | 77479 (38570–133058) | 26451 (12334–46244) | 14949 (6837–26669)  |
|                              | Percent (all-cause)*  | 1.3% (0.8–1.9%)     | 3.6% (1.6–6.4%)     | 1.2% (0.6–2%)        | 0.4% (0.2–0.8%)     | 0.3% (0.1–0.6%)     |
|                              | Percent (proportion)† | 11.8%               | 15.2%               | 47.5%                | 16.2%               | 9.2%                |
| United Arab Emirates         | Number                | 629 (230–1238)      | 1737 (598–3520)     | 14233 (7127–22910)   | 2189 (967–3912)     | 116 (43–211)        |
|                              | Percent (all-cause)*  | 1.7% (0.6–3.3%)     | 3.5% (1.2–7%)       | 1% (0.5–1.5%)        | 0.4% (0.2–0.7%)     | 0.2% (0.1–0.4%)     |
|                              | Percent (proportion)† | 3.3%                | 9.2%                | 75.3%                | 11.6%               | 0.6%                |
| Yemen                        | Number                | 10715 (5578–17386)  | 14315 (6862–25849)  | 21189 (11027–35562)  | 2573 (1424–4238)    | 749 (356–1295)      |
|                              | Percent (all-cause)*  | 0.3% (0.1–0.4%)     | 1.4% (0.7–2.5%)     | 0.5% (0.3–0.8%)      | 0.2% (0.1–0.3%)     | 0.1% (0–0.2%)       |
|                              | Percent (proportion)† | 21.6%               | 28.9%               | 42.8%                | 5.2%                | 1.5%                |
| Afghanistan                  | Number                | 25137 (10576–40580) | 22371 (10833–39696) | 41972 (21467–67215)  | 3748 (2008–5953)    | 812 (380–1428)      |
|                              | Percent (all-cause)*  | 0.3% (0.1–0.5%)     | 1.7% (0.9–3%)       | 0.8% (0.4–1.2%)      | 0.2% (0.1–0.3%)     | 0.1% (0–0.2%)       |
|                              | Percent (proportion)† | 26.7%               | 23.8%               | 44.6%                | 4.0%                | 0.9%                |
| Sudan                        | Number                | 19342 (9899–30810)  | 19054 (9514–34141)  | 31355 (16822–51598)  | 3714 (1946–6422)    | 1231 (581–2271)     |
|                              | Percent (all-cause)*  | 0.4% (0.2–0.6%)     | 2% (1.3–5%)         | 0.8% (0.4–1.2%)      | 0.2% (0.1–0.3%)     | 0.1% (0.1–0.2%)     |
|                              | Percent (proportion)† | 25.9%               | 25.5%               | 42.0%                | 5.0%                | 1.6%                |
| <b>Deaths</b>                |                       |                     |                     |                      |                     |                     |
| Global                       | Number                | 8242 (6534–10730)   | 7339 (6162–8890)    | 53273 (47734–60615)  | 23716 (20434–26475) | 21442 (16765–24127) |
|                              | Percent (all-cause)*  | 0.2% (0.1–0.2%)     | 1.1% (0.9–1.3%)     | 0.7% (0.7–0.8%)      | 0.2% (0.1–0.2%)     | 0.1% (0.1–0.1%)     |
|                              | Percent (proportion)† | 7.2%                | 6.4%                | 46.7%                | 20.8%               | 18.8%               |
| North Africa and Middle East | Number                | 763 (395–1036)      | 647 (506–798)       | 3426 (2825–4072)     | 1018 (847–1216)     | 717 (572–877)       |
|                              | Percent (all-cause)*  | 0.3% (0.1–0.3%)     | 1.3% (1.1–1.6%)     | 0.7% (0.6–0.7%)      | 0.1% (0.1–0.1%)     | 0.1% (0–0.1%)       |
|                              | Percent (proportion)† | 11.6%               | 9.8%                | 52.1%                | 15.5%               | 10.9%               |
| Algeria                      | Number                | 44 (21–65)          | 42 (31–56)          | 217 (161–281)        | 60 (42–80)          | 47 (36–60)          |
|                              | Percent (all-cause)*  | 0.3% (0.1–0.4%)     | 1.7% (1.2–2.2%)     | 0.8% (0.6–0.9%)      | 0.1% (0.1–0.2%)     | 0% (0–0.1%)         |
|                              | Percent (proportion)† | 10.7%               | 10.2%               | 52.9%                | 14.7%               | 11.5%               |
| Bahrain                      | Number                | 0 (0–1)             | 1 (1–1)             | 10 (7–13)            | 4 (3–5)             | 2 (1–3)             |
|                              | Percent (all-cause)*  | 0.5% (0.4–0.8%)     | 2.1% (1.5–3.4%)     | 1.2% (1.1–1.6%)      | 0.2% (0.2–0.3%)     | 0.1% (0.1–0.2%)     |
|                              | Percent (proportion)† | 2.5%                | 4.2%                | 57.3%                | 23.0%               | 13.1%               |
| Egypt                        | Number                | 25 (12–59)          | 47 (31–82)          | 270 (156–390)        | 76 (48–109)         | 22 (15–32)          |
|                              | Percent (all-cause)*  | 0.1% (0–0.2%)       | 0.6% (0.4–1%)       | 0.3% (0.2–0.5%)      | 0% (0–0%)           | 0% (0–0%)           |
|                              | Percent (proportion)† | 5.7%                | 10.8%               | 61.3%                | 17.2%               | 5.0%                |
| Iran                         | Number                | 43 (21–67)          | 63 (54–76)          | 355 (325–439)        | 115 (104–134)       | 87 (75–103)         |
|                              | Percent (all-cause)*  | 0.3% (0.1–0.4%)     | 1.4% (1.2–1.7%)     | 0.6% (0.6–0.8%)      | 0.1% (0.1–0.1%)     | 0% (0–0%)           |
|                              | Percent (proportion)† | 6.4%                | 9.5%                | 53.6%                | 17.3%               | 13.1%               |
| Iraq                         | Number                | 20 (12–32)          | 32 (25–42)          | 188 (130–263)        | 44 (31–60)          | 17 (13–24)          |
|                              | Percent (all-cause)*  | 0.1% (0.1–0.2%)     | 0.9% (0.7–1.1%)     | 0.5% (0.4–0.6%)      | 0.1% (0.1–0.1%)     | 0% (0–0%)           |
|                              | Percent (proportion)† | 6.7%                | 10.7%               | 62.3%                | 14.7%               | 5.6%                |
| Jordan                       | Number                | 5 (3–7)             | 8 (6–10)            | 39 (28–49)           | 11 (7–15)           | 4 (3–5)             |
|                              | Percent (all-cause)*  | 0.1% (0.1–0.2%)     | 1.1% (0.9–1.4%)     | 0.8% (0.6–0.9%)      | 0.1% (0.1–0.1%)     | 0% (0–0%)           |
|                              | Percent (proportion)† | 7.2%                | 11.5%               | 58.6%                | 16.7%               | 6.0%                |
| Kuwait                       | Number                | 1 (1–2)             | 3 (3–4)             | 17 (14–22)           | 4 (3–5)             | 3 (2–3)             |
|                              | Percent (all-cause)*  | 0.3% (0.2–0.3%)     | 2.8% (2.3–3.4%)     | 0.8% (0.7–1.1%)      | 0.1% (0.1–0.2%)     | 0.1% (0–0.1%)       |
|                              | Percent (proportion)† | 5.3%                | 11.5%               | 60.7%                | 13.1%               | 9.4%                |
| Lebanon                      | Number                | 3 (1–5)             | 3 (2–4)             | 23 (17–33)           | 8 (6–11)            | 9 (7–13)            |
|                              | Percent (all-cause)*  | 0.3% (0.1–0.5%)     | 1.7% (1.1–2.6%)     | 0.7% (0.6–1%)        | 0.1% (0.1–0.1%)     | 0% (0–0.1%)         |
|                              | Percent (proportion)† | 5.9%                | 6.0%                | 50.4%                | 17.9%               | 19.9%               |
| Libya                        | Number                | 5 (2–8)             | 4 (3–7)             | 46 (33–63)           | 13 (8–18)           | 7 (5–10)            |
|                              | Percent (all-cause)*  | 0.4% (0.2–0.6%)     | 1.1% (0.7–1.7%)     | 0.6% (0.5–0.8%)      | 0.1% (0.1–0.2%)     | 0.1% (0–0.1%)       |
|                              | Percent (proportion)† | 6.3%                | 5.5%                | 61.3%                | 16.9%               | 9.9%                |

**Table S25** Age-specific disability and death related to idiopathic epilepsy in North Africa and Middle East countries in 2019

|                                           |                       | <b>Under 5</b>          | <b>5-14 years</b>        | <b>15-49 years</b>        | <b>50-69 years</b>       | <b>70+ years</b>       |
|-------------------------------------------|-----------------------|-------------------------|--------------------------|---------------------------|--------------------------|------------------------|
|                                           |                       | Mean (95% UI)           | Mean (95% UI)            | Mean (95% UI)             | Mean (95% UI)            | Mean (95% UI)          |
| Morocco                                   | Number                | 10 (4–29)               | 23 (8–57)                | 156 (54–414)              | 71 (21–219)              | 44 (11–134)            |
|                                           | Percent (all-cause)*  | 0.1% (0.0–0.3%)         | 1.2% (0.4–2.9%)          | 0.6% (0.2–1.5%)           | 0.1% (0.0–0.3%)          | 0% (0.0–0.1%)          |
|                                           | Percent (proportion)† | 3.3%                    | 7.5%                     | 51.3%                     | 23.5%                    | 14.4%                  |
| Palestine                                 | Number                | 5 (4–8)                 | 7 (5–10)                 | 37 (31–43)                | 10 (8–12)                | 5 (4–7)                |
|                                           | Percent (all-cause)*  | 0.3% (0.3–0.5%)         | 2.2% (1.7–3.2%)          | 1.6% (1.5–1.9%)           | 0.2% (0.2–0.2%)          | 0.1% (0.1–0.1%)        |
|                                           | Percent (proportion)† | 8.6%                    | 10.8%                    | 57.6%                     | 15.0%                    | 8.0%                   |
| Oman                                      | Number                | 1 (0–1)                 | 1 (1–1)                  | 8 (6–12)                  | 2 (1–2)                  | 1 (1–1)                |
|                                           | Percent (all-cause)*  | 0.1% (0.1–0.1%)         | 0.5% (0.3–0.6%)          | 0.2% (0.2–0.3%)           | 0% (0.0–0.1%)            | 0% (0.0–0%)            |
|                                           | Percent (proportion)† | 5.2%                    | 7.2%                     | 67.2%                     | 13.8%                    | 6.5%                   |
| Qatar                                     | Number                | 0 (0–1)                 | 1 (1–1)                  | 9 (6–12)                  | 1 (1–2)                  | <0.1 (<0.1–<0.1)       |
|                                           | Percent (all-cause)*  | 0.2% (0.1–0.3%)         | 1.2% (0.9–1.6%)          | 0.5% (0.4–0.7%)           | 0.1% (0.1–0.1%)          | 0% (0.0–0%)            |
|                                           | Percent (proportion)† | 3.4%                    | 6.1%                     | 76.8%                     | 11.7%                    | 2.1%                   |
| Saudi Arabia                              | Number                | 6 (3–16)                | 13 (9–19)                | 455 (314–656)             | 96 (69–126)              | 32 (20–41)             |
|                                           | Percent (all-cause)*  | 0.2% (0.1–0.6%)         | 1.8% (1.3–2.5%)          | 0.9% (0.7–1.2%)           | 0.2% (0.2–0.3%)          | 0.1% (0.1–0.1%)        |
|                                           | Percent (proportion)† | 0.9%                    | 2.2%                     | 75.6%                     | 15.9%                    | 5.3%                   |
| Syrian Arab Republic                      | Number                | 3 (2–6)                 | 6 (4–10)                 | 51 (31–72)                | 19 (12–27)               | 8 (6–10)               |
|                                           | Percent (all-cause)*  | 0.1% (0.1–0.2%)         | 0.4% (0.3–0.8%)          | 0.5% (0.3–0.6%)           | 0.1% (0.0–0.1%)          | 0% (0.0–0%)            |
|                                           | Percent (proportion)† | 3.9%                    | 6.6%                     | 58.2%                     | 22.1%                    | 9.2%                   |
| Tunisia                                   | Number                | 7 (3–11)                | 8 (5–11)                 | 47 (32–68)                | 21 (14–30)               | 18 (13–24)             |
|                                           | Percent (all-cause)*  | 0.3% (0.2–0.5%)         | 1.7% (1.2–2.5%)          | 0.7% (0.6–0.9%)           | 0.1% (0.1–0.1%)          | 0% (0.0–0.1%)          |
|                                           | Percent (proportion)† | 6.6%                    | 7.6%                     | 47.0%                     | 21.0%                    | 17.8%                  |
| Türkiye                                   | Number                | 139 (71–196)            | 91 (72–115)              | 511 (393–691)             | 282 (215–365)            | 339 (242–428)          |
|                                           | Percent (all-cause)*  | 0.9% (0.5–1.2%)         | 3.7% (3.4–5%)            | 1.4% (1.2–1.8%)           | 0.2% (0.2–0.3%)          | 0.1% (0.1–0.1%)        |
|                                           | Percent (proportion)† | 10.2%                   | 6.7%                     | 37.5%                     | 20.7%                    | 24.9%                  |
| United Arab Emirates                      | Number                | 2 (1–4)                 | 3 (2–6)                  | 115 (69–184)              | 19 (10–31)               | 1 (1–2)                |
|                                           | Percent (all-cause)*  | 0.5% (0.2–1.3%)         | 2% (1.2–3.7%)            | 0.8% (0.5–1.1%)           | 0.2% (0.1–0.2%)          | 0% (0.0–0.1%)          |
|                                           | Percent (proportion)† | 1.1%                    | 2.4%                     | 82.0%                     | 13.7%                    | 0.9%                   |
| Yemen                                     | Number                | 77 (36–126)             | 68 (44–101)              | 179 (107–262)             | 40 (26–59)               | 18 (12–25)             |
|                                           | Percent (all-cause)*  | 0.2% (0.1–0.3%)         | 1% (0.7–1.3%)            | 0.4% (0.3–0.6%)           | 0.1% (0.1–0.1%)          | 0% (0.0–0.1%)          |
|                                           | Percent (proportion)† | 20.1%                   | 17.8%                    | 46.7%                     | 10.6%                    | 4.8%                   |
| Afghanistan                               | Number                | 210 (77–360)            | 129 (78–188)             | 429 (196–682)             | 68 (37–98)               | 23 (16–34)             |
|                                           | Percent (all-cause)*  | 0.3% (0.1–0.4%)         | 1.5% (0.9–2%)            | 0.7% (0.3–0.9%)           | 0.1% (0.1–0.2%)          | 0% (0.0–0.1%)          |
|                                           | Percent (proportion)† | 24.5%                   | 15.0%                    | 49.9%                     | 7.9%                     | 2.7%                   |
| Sudan                                     | Number                | 156 (67–258)            | 94 (57–143)              | 261 (156–388)             | 52 (33–75)               | 29 (20–41)             |
|                                           | Percent (all-cause)*  | 0.3% (0.1–0.5%)         | 1.7% (1.1–2.4%)          | 0.7% (0.5–0.9%)           | 0.1% (0.1–0.2%)          | 0% (0.0–0.1%)          |
|                                           | Percent (proportion)† | 26.4%                   | 15.8%                    | 44.2%                     | 8.8%                     | 4.9%                   |
| <b>YLDs (Years Lived with Disability)</b> |                       |                         |                          |                           |                          |                        |
| Global                                    | Number                | 649209 (366259–1025820) | 1578201 (896618–2556081) | 3667157 (2279484–5491347) | 1193064 (703496–1795679) | 653173 (396382–976374) |
|                                           | Percent (all-cause)*  | 2.4% (1.4–3.7%)         | 2.5% (1.5–3.9%)          | 0.9% (0.6–1.4%)           | 0.5% (0.3–0.7%)          | 0.5% (0.3–0.7%)        |
|                                           | Percent (proportion)† | 8.4%                    | 20.4%                    | 47.4%                     | 15.4%                    | 8.4%                   |
| North Africa and Middle East              | Number                | 71148 (38107–115403)    | 148087 (80697–250836)    | 289352 (162603–458214)    | 66503 (35086–111251)     | 28023 (14552–45895)    |
|                                           | Percent (all-cause)*  | 3% (1.7–4.8%)           | 2.7% (1.6–4.4%)          | 0.8% (0.5–1.3%)           | 0.5% (0.3–0.8%)          | 0.5% (0.3–0.9%)        |
|                                           | Percent (proportion)† | 11.8%                   | 24.6%                    | 48.0%                     | 11.0%                    | 4.6%                   |
| Algeria                                   | Number                | 4916 (1133–10808)       | 9462 (2099–21448)        | 17776 (3913–36171)        | 4513 (923–9706)          | 1997 (418–4212)        |
|                                           | Percent (all-cause)*  | 3.4% (0.8–7.2%)         | 3% (0.7–6.7%)            | 0.8% (0.2–1.6%)           | 0.4% (0.1–0.9%)          | 0.5% (0.1–1%)          |
|                                           | Percent (proportion)† | 12.7%                   | 24.5%                    | 46.0%                     | 11.7%                    | 5.2%                   |
| Bahrain                                   | Number                | 87 (18–195)             | 240 (51–557)             | 886 (213–1905)            | 281 (60–614)             | 56 (14–117)            |
|                                           | Percent (all-cause)*  | 4.1% (0.9–8.7%)         | 3.4% (0.8–7.3%)          | 0.9% (0.2–1.9%)           | 0.6% (0.1–1.3%)          | 0.8% (0.2–1.7%)        |
|                                           | Percent (proportion)† | 5.6%                    | 15.5%                    | 57.2%                     | 18.1%                    | 3.6%                   |
| Egypt                                     | Number                | 14689 (3089–30199)      | 26394 (6047–54975)       | 35459 (8535–74423)        | 8134 (1760–17022)        | 2602 (624–5368)        |
|                                           | Percent (all-cause)*  | 4% (0.9–8%)             | 2.6% (0.7–5.5%)          | 0.7% (0.2–1.5%)           | 0.4% (0.1–0.8%)          | 0.4% (0.1–0.8%)        |
|                                           | Percent (proportion)† | 16.8%                   | 30.2%                    | 40.6%                     | 9.3%                     | 3.0%                   |



**Table S25** Age-specific disability and death related to idiopathic epilepsy in North Africa and Middle East countries in 2019

|                      |                       | <b>Under 5</b>    | <b>5-14 years</b>  | <b>15-49 years</b>   | <b>50-69 years</b> | <b>70+ years</b>   |
|----------------------|-----------------------|-------------------|--------------------|----------------------|--------------------|--------------------|
|                      |                       | Mean (95% UI)     | Mean (95% UI)      | Mean (95% UI)        | Mean (95% UI)      | Mean (95% UI)      |
| Iran                 | Number                | 8692 (4605–14609) | 18498 (9736–30887) | 37785 (20982–59969)  | 10214 (5605–16660) | 4661 (2605–7332)   |
|                      | Percent (all-cause)*  | 4.1% (2.2–6.4%)   | 3.2% (1.7–5.1%)    | 0.7% (0.4–1.1%)      | 0.4% (0.2–0.7%)    | 0.5% (0.3–0.7%)    |
|                      | Percent (proportion)† | 10.9%             | 23.2%              | 47.3%                | 12.8%              | 5.8%               |
| Iraq                 | Number                | 5317 (1162–11498) | 11361 (2378–24640) | 18915 (4002–41162)   | 3049 (629–6560)    | 1022 (233–2178)    |
|                      | Percent (all-cause)*  | 3.1% (0.7–6.6%)   | 2.6% (0.6–5.6%)    | 0.8% (0.2–1.7%)      | 0.4% (0.1–0.8%)    | 0.4% (0.1–0.8%)    |
|                      | Percent (proportion)† | 13.4%             | 28.6%              | 47.7%                | 7.7%               | 2.6%               |
| Jordan               | Number                | 1359 (301–3107)   | 3154 (697–7273)    | 4844 (1048–10652)    | 844 (203–1907)     | 275 (60–596)       |
|                      | Percent (all-cause)*  | 3.6% (0.8–8.1%)   | 2.9% (0.7–6.4%)    | 0.8% (0.2–1.8%)      | 0.4% (0.1–0.9%)    | 0.4% (0.1–0.9%)    |
|                      | Percent (proportion)† | 13.0%             | 30.1%              | 46.2%                | 8.1%               | 2.6%               |
| Kuwait               | Number                | 368 (82–870)      | 795 (186–1886)     | 2304 (548–5215)      | 441 (102–1052)     | 140 (31–306)       |
|                      | Percent (all-cause)*  | 4.3% (0.9–9.4%)   | 3.3% (0.8–7.3%)    | 0.7% (0.2–1.6%)      | 0.5% (0.1–1.1%)    | 0.6% (0.1–1.2%)    |
|                      | Percent (proportion)† | 9.1%              | 19.6%              | 56.9%                | 10.9%              | 3.5%               |
| Lebanon              | Number                | 553 (127–1250)    | 1098 (235–2487)    | 2028 (486–4490)      | 573 (133–1320)     | 386 (91–888)       |
|                      | Percent (all-cause)*  | 3.6% (0.8–8.1%)   | 3% (0.7–6.6%)      | 0.7% (0.2–1.6%)      | 0.4% (0.1–0.9%)    | 0.4% (0.1–1%)      |
|                      | Percent (proportion)† | 11.9%             | 23.7%              | 43.7%                | 12.3%              | 8.3%               |
| Libya                | Number                | 395 (107–826)     | 1152 (315–2436)    | 3112 (882–6310)      | 615 (173–1291)     | 264 (74–513)       |
|                      | Percent (all-cause)*  | 2.8% (0.8–5.7%)   | 2.3% (0.6–4.8%)    | 0.7% (0.2–1.4%)      | 0.4% (0.1–0.7%)    | 0.4% (0.1–0.8%)    |
|                      | Percent (proportion)† | 7.1%              | 20.8%              | 56.2%                | 11.1%              | 4.8%               |
| Morocco              | Number                | 3801 (706–8691)   | 8345 (1709–18263)  | 15583 (3271–33467)   | 4285 (903–9547)    | 1664 (361–3591)    |
|                      | Percent (all-cause)*  | 3.4% (0.7–7.8%)   | 2.8% (0.6–6%)      | 0.8% (0.2–1.6%)      | 0.4% (0.1–0.9%)    | 0.4% (0.1–0.9%)    |
|                      | Percent (proportion)† | 11.3%             | 24.8%              | 46.3%                | 12.7%              | 4.9%               |
| Palestine            | Number                | 635 (147–1382)    | 1479 (322–3127)    | 2146 (502–4503)      | 336 (76–709)       | 114 (27–232)       |
|                      | Percent (all-cause)*  | 3.4% (0.8–7.1%)   | 2.6% (0.6–5.4%)    | 0.8% (0.2–1.6%)      | 0.4% (0.1–0.8%)    | 0.4% (0.1–0.9%)    |
|                      | Percent (proportion)† | 13.5%             | 31.4%              | 45.6%                | 7.1%               | 2.4%               |
| Oman                 | Number                | 474 (112–1078)    | 813 (184–1898)     | 2269 (548–4883)      | 269 (65–606)       | 65 (16–137)        |
|                      | Percent (all-cause)*  | 3.3% (0.8–7%)     | 2.9% (0.7–6.3%)    | 0.8% (0.2–1.7%)      | 0.4% (0.1–1%)      | 0.4% (0.1–0.9%)    |
|                      | Percent (proportion)† | 12.2%             | 20.9%              | 58.3%                | 6.9%               | 1.7%               |
| Qatar                | Number                | 176 (41–396)      | 362 (87–845)       | 1733 (416–3924)      | 237 (54–529)       | 23 (6–51)          |
|                      | Percent (all-cause)*  | 4.5% (1.1–9.8%)   | 3.4% (0.8–7.4%)    | 0.8% (0.2–1.8%)      | 0.5% (0.1–1.1%)    | 0.5% (0.1–1.1%)    |
|                      | Percent (proportion)† | 6.9%              | 14.3%              | 68.5%                | 9.3%               | 0.9%               |
| Saudi Arabia         | Number                | 3047 (703–6762)   | 7749 (1906–17426)  | 34125 (8194–71059)   | 5476 (1285–11535)  | 1153 (270–2345)    |
|                      | Percent (all-cause)*  | 4.6% (1.1–9.9%)   | 3.9% (1–8.4%)      | 1.3% (0.3–2.7%)      | 0.8% (0.2–1.7%)    | 0.8% (0.2–1.7%)    |
|                      | Percent (proportion)† | 5.9%              | 15.0%              | 66.2%                | 10.6%              | 2.2%               |
| Syrian Arab Republic | Number                | 1323 (275–2870)   | 3389 (696–7577)    | 5123 (1075–10845)    | 1360 (323–2960)    | 430 (103–905)      |
|                      | Percent (all-cause)*  | 3% (0.7–6.3%)     | 2% (0.4–4.3%)      | 0.6% (0.1–1.3%)      | 0.3% (0.1–0.7%)    | 0.3% (0.1–0.6%)    |
|                      | Percent (proportion)† | 11.4%             | 29.2%              | 44.1%                | 11.7%              | 3.7%               |
| Tunisia              | Number                | 834 (184–1897)    | 1920 (411–4363)    | 3859 (828–8621)      | 1361 (311–3012)    | 694 (151–1488)     |
|                      | Percent (all-cause)*  | 3.2% (0.8–7.1%)   | 2.7% (0.6–5.7%)    | 0.6% (0.1–1.3%)      | 0.4% (0.1–0.8%)    | 0.4% (0.1–0.8%)    |
|                      | Percent (proportion)† | 9.6%              | 22.1%              | 44.5%                | 15.7%              | 8.0%               |
| Türkiye              | Number                | 7238 (1651–15585) | 17620 (4042–38172) | 48974 (11747–103954) | 18011 (4399–38379) | 10566 (2712–22231) |
|                      | Percent (all-cause)*  | 4.5% (1.2–9.3%)   | 3.6% (0.9–7.5%)    | 1% (0.3–2.2%)        | 0.7% (0.2–1.5%)    | 0.8% (0.2–1.7%)    |
|                      | Percent (proportion)† | 7.1%              | 17.2%              | 47.8%                | 17.6%              | 10.3%              |
| United Arab Emirates | Number                | 496 (120–1055)    | 1475 (340–3189)    | 8259 (2009–16540)    | 1545 (392–3210)    | 98 (27–196)        |
|                      | Percent (all-cause)*  | 4.6% (1.2–9.3%)   | 4% (1–8.8%)        | 1.1% (0.3–2.2%)      | 0.9% (0.2–1.7%)    | 0.9% (0.2–1.6%)    |
|                      | Percent (proportion)† | 4.2%              | 12.4%              | 69.6%                | 13.0%              | 0.8%               |
| Yemen                | Number                | 4038 (807–9022)   | 8906 (1839–20073)  | 10991 (2130–24230)   | 1312 (289–2848)    | 483 (101–1032)     |
|                      | Percent (all-cause)*  | 1.2% (0.3–2.5%)   | 1.9% (0.4–4.3%)    | 0.6% (0.1–1.4%)      | 0.3% (0.1–0.7%)    | 0.3% (0.1–0.7%)    |
|                      | Percent (proportion)† | 15.7%             | 34.6%              | 42.7%                | 5.1%               | 1.9%               |
| Afghanistan          | Number                | 6824 (1076–16029) | 12095 (2155–28343) | 16937 (2791–37326)   | 1494 (237–3484)    | 473 (80–1061)      |
|                      | Percent (all-cause)*  | 2.3% (0.4–4.9%)   | 2% (0.4–4.6%)      | 0.8% (0.1–1.7%)      | 0.3% (0.1–0.7%)    | 0.3% (0.1–0.7%)    |
|                      | Percent (proportion)† | 18.0%             | 32.0%              | 44.8%                | 3.9%               | 1.2%               |
| Sudan                | Number                | 5814 (1264–13306) | 11629 (2588–27240) | 15949 (3473–35555)   | 2088 (421–4885)    | 830 (175–1884)     |
|                      | Percent (all-cause)*  | 2.1% (0.5–4.6%)   | 2.3% (0.5–5.1%)    | 0.8% (0.2–1.7%)      | 0.4% (0.1–0.8%)    | 0.4% (0.1–0.8%)    |

**Table S25** Age-specific disability and death related to idiopathic epilepsy in North Africa and Middle East countries in 2019

|                                  |                       | <b>Under 5</b>         | <b>5-14 years</b>      | <b>15-49 years</b>        | <b>50-69 years</b>     | <b>70+ years</b>       |
|----------------------------------|-----------------------|------------------------|------------------------|---------------------------|------------------------|------------------------|
|                                  |                       | Mean (95% UI)          | Mean (95% UI)          | Mean (95% UI)             | Mean (95% UI)          | Mean (95% UI)          |
| Percent (proportion)†            |                       | 16·0%                  | 32·0%                  | 43·9%                     | 5·7%                   | 2·3%                   |
| <b>YLLs (Years of Life Lost)</b> |                       |                        |                        |                           |                        |                        |
| Global                           | Number                | 715618 (567062–932427) | 578522 (485307–701108) | 3037311 (2722902–3465690) | 721261 (622686–802261) | 284109 (227543–320376) |
|                                  | Percent (all-cause)*  | 0·2% (0·1–0·2%)        | 1·1% (0·9–1·3%)        | 0·8% (0·7–0·9%)           | 0·2% (0·1–0·2%)        | 0·1% (0·1–0·1%)        |
|                                  | Percent (proportion)† | 13·4%                  | 10·8%                  | 56·9%                     | 13·5%                  | 5·3%                   |
| North Africa and Middle East     | Number                | 66219 (34273–89854)    | 51209 (39999–63269)    | 193566 (159820–230173)    | 31670 (26457–37767)    | 9493 (7532–11609)      |
|                                  | Percent (all-cause)*  | 0·3% (0·1–0·3%)        | 1·3% (1·1–1·6%)        | 0·7% (0·6–0·8%)           | 0·1% (0·1–0·1%)        | 0·1% (0·0–0·1%)        |
|                                  | Percent (proportion)† | 18·8%                  | 14·5%                  | 55·0%                     | 9·0%                   | 2·7%                   |
| Algeria                          | Number                | 3812 (1838–5678)       | 3305 (2405–4419)       | 12234 (9175–15857)        | 1865 (1310–2516)       | 603 (445–775)          |
|                                  | Percent (all-cause)*  | 0·2% (0·1–0·4%)        | 1·7% (1·2–2·2%)        | 0·8% (0·7–1%)             | 0·1% (0·1–0·2%)        | 0% (0·0–0·1%)          |
|                                  | Percent (proportion)† | 17·5%                  | 15·1%                  | 56·1%                     | 8·5%                   | 2·8%                   |
| Bahrain                          | Number                | 37 (25–60)             | 56 (40–93)             | 541 (416–730)             | 120 (86–160)           | 30 (16–40)             |
|                                  | Percent (all-cause)*  | 0·5% (0·4–0·7%)        | 2·1% (1·5–3·4%)        | 1·2% (1·1–1·6%)           | 0·2% (0·2–0·3%)        | 0·1% (0·1–0·2%)        |
|                                  | Percent (proportion)† | 4·7%                   | 7·2%                   | 68·9%                     | 15·3%                  | 3·9%                   |
| Egypt                            | Number                | 2191 (1047–5099)       | 3731 (2407–6492)       | 15742 (8997–22820)        | 2380 (1510–3421)       | 330 (220–478)          |
|                                  | Percent (all-cause)*  | 0·1% (0·0–0·2%)        | 0·6% (0·4–1%)          | 0·4% (0·2–0·5%)           | 0% (0–0%)              | 0% (0–0%)              |
|                                  | Percent (proportion)† | 9·0%                   | 15·3%                  | 64·6%                     | 9·8%                   | 1·4%                   |
| Iran                             | Number                | 3694 (1801–5808)       | 4977 (4238–6021)       | 20089 (18392–25027)       | 3544 (3213–4157)       | 1111 (978–1302)        |
|                                  | Percent (all-cause)*  | 0·3% (0·1–0·4%)        | 1·4% (1·2–1·7%)        | 0·6% (0·6–0·8%)           | 0·1% (0·1–0·1%)        | 0% (0·0–0·1%)          |
|                                  | Percent (proportion)† | 11·1%                  | 14·9%                  | 60·1%                     | 10·6%                  | 3·3%                   |
| Iraq                             | Number                | 1750 (1057–2757)       | 2546 (1963–3337)       | 10634 (7413–14823)        | 1430 (995–1927)        | 239 (185–325)          |
|                                  | Percent (all-cause)*  | 0·1% (0·1–0·2%)        | 0·9% (0·7–1·1%)        | 0·5% (0·4–0·6%)           | 0·1% (0·1–0·1%)        | 0% (0–0%)              |
|                                  | Percent (proportion)† | 10·5%                  | 15·3%                  | 64·1%                     | 8·6%                   | 1·4%                   |
| Jordan                           | Number                | 418 (270–624)          | 608 (470–778)          | 2223 (1639–2775)          | 355 (231–472)          | 55 (43–75)             |
|                                  | Percent (all-cause)*  | 0·1% (0·1–0·2%)        | 1·1% (0·9–1·4%)        | 0·9% (0·6–1%)             | 0·1% (0·1–0·2%)        | 0% (0–0%)              |
|                                  | Percent (proportion)† | 11·4%                  | 16·6%                  | 60·7%                     | 9·7%                   | 1·5%                   |
| Kuwait                           | Number                | 127 (92–171)           | 250 (198–317)          | 932 (762–1221)            | 116 (91–147)           | 33 (26–41)             |
|                                  | Percent (all-cause)*  | 0·3% (0·2–0·3%)        | 2·8% (2·3–3·4%)        | 0·9% (0·8–1·1%)           | 0·1% (0·1–0·2%)        | 0·1% (0·1–0·1%)        |
|                                  | Percent (proportion)† | 8·7%                   | 17·1%                  | 64·0%                     | 7·9%                   | 2·3%                   |
| Lebanon                          | Number                | 236 (100–431)          | 218 (137–356)          | 1325 (945–1870)           | 251 (170–351)          | 119 (87–172)           |
|                                  | Percent (all-cause)*  | 0·3% (0·1–0·5%)        | 1·7% (1·1–2·6%)        | 0·8% (0·6–1·1%)           | 0·1% (0·1–0·1%)        | 0% (0·0–0·1%)          |
|                                  | Percent (proportion)† | 11·0%                  | 10·1%                  | 61·7%                     | 11·7%                  | 5·5%                   |
| Libya                            | Number                | 410 (192–657)          | 327 (215–515)          | 2540 (1831–3462)          | 402 (265–570)          | 97 (64–136)            |
|                                  | Percent (all-cause)*  | 0·4% (0·2–0·6%)        | 1·1% (0·7–1·7%)        | 0·7% (0·5–0·8%)           | 0·2% (0·1–0·2%)        | 0·1% (0·0–0·1%)        |
|                                  | Percent (proportion)† | 10·9%                  | 8·7%                   | 67·3%                     | 10·7%                  | 2·6%                   |
| Morocco                          | Number                | 865 (305–2478)         | 1805 (647–4454)        | 8776 (3085–23179)         | 2196 (654–6788)        | 584 (154–1818)         |
|                                  | Percent (all-cause)*  | 0·1% (0·0–0·2%)        | 1·2% (0·4–2·9%)        | 0·6% (0·2–1·6%)           | 0·1% (0·0–0·3%)        | 0% (0·0–0·1%)          |
|                                  | Percent (proportion)† | 6·1%                   | 12·7%                  | 61·7%                     | 15·4%                  | 4·1%                   |
| Palestine                        | Number                | 472 (305–734)          | 545 (415–782)          | 2140 (1796–2552)          | 298 (239–378)          | 66 (53–95)             |
|                                  | Percent (all-cause)*  | 0·3% (0·3–0·5%)        | 2·2% (1·7–3·2%)        | 1·7% (1·6–2%)             | 0·2% (0·2–0·2%)        | 0·1% (0·1–0·1%)        |
|                                  | Percent (proportion)† | 13·4%                  | 15·5%                  | 60·8%                     | 8·5%                   | 1·9%                   |
| Oman                             | Number                | 55 (37–78)             | 69 (52–94)             | 468 (363–685)             | 51 (38–75)             | 12 (8–15)              |
|                                  | Percent (all-cause)*  | 0·1% (0·1–0·1%)        | 0·4% (0·3–0·6%)        | 0·2% (0·2–0·4%)           | 0% (0·0–0·1%)          | 0% (0–0%)              |
|                                  | Percent (proportion)† | 8·3%                   | 10·6%                  | 71·4%                     | 7·9%                   | 1·8%                   |
| Qatar                            | Number                | 33 (21–53)             | 55 (41–76)             | 483 (357–666)             | 42 (29–61)             | 4 (3–5)                |
|                                  | Percent (all-cause)*  | 0·2% (0·1–0·3%)        | 1·2% (0·9–1·6%)        | 0·5% (0·4–0·7%)           | 0·1% (0·1–0·1%)        | 0% (0–0%)              |
|                                  | Percent (proportion)† | 5·3%                   | 8·9%                   | 78·4%                     | 6·8%                   | 0·6%                   |
| Saudi Arabia                     | Number                | 486 (232–1376)         | 1039 (729–1505)        | 24731 (17275–35451)       | 3111 (2198–4143)       | 439 (275–556)          |
|                                  | Percent (all-cause)*  | 0·2% (0·1–0·6%)        | 1·7% (1·3–2·5%)        | 0·9% (0·8–1·2%)           | 0·2% (0·2–0·3%)        | 0·1% (0·1–0·1%)        |
|                                  | Percent (proportion)† | 1·6%                   | 3·5%                   | 83·0%                     | 10·4%                  | 1·5%                   |
| Syrian Arab Republic             | Number                | 297 (178–486)          | 456 (326–819)          | 2771 (1831–3898)          | 608 (387–868)          | 117 (87–155)           |
|                                  | Percent (all-cause)*  | 0·1% (0·1–0·2%)        | 0·4% (0·3–0·8%)        | 0·5% (0·4–0·6%)           | 0·1% (0·0–0·1%)        | 0% (0–0%)              |

**Table S25** Age-specific disability and death related to idiopathic epilepsy in North Africa and Middle East countries in 2019

|                      |                       | <b>Under 5</b>     | <b>5-14 years</b>  | <b>15-49 years</b>  | <b>50-69 years</b> | <b>70+ years</b> |
|----------------------|-----------------------|--------------------|--------------------|---------------------|--------------------|------------------|
|                      |                       | Mean (95% UI)      | Mean (95% UI)      | Mean (95% UI)       | Mean (95% UI)      | Mean (95% UI)    |
| Tunisia              | Percent (proportion)† | 7·0%               | 10·7%              | 65·2%               | 14·3%              | 2·8%             |
|                      | Number                | 573 (263–911)      | 602 (398–871)      | 2626 (1781–3776)    | 641 (428–922)      | 235 (164–317)    |
|                      | Percent (all-cause)*  | 0·3% (0·2–0·5%)    | 1·7% (1·2–2·5%)    | 0·8% (0·6–1%)       | 0·1% (0·1–0·2%)    | 0% (0–0·1%)      |
| Türkiye              | Percent (proportion)† | 12·3%              | 12·9%              | 56·1%               | 13·7%              | 5·0%             |
|                      | Number                | 12045 (6151–16919) | 7196 (5683–9142)   | 28505 (21978–38691) | 8440 (6393–10990)  | 4383 (3126–5570) |
|                      | Percent (all-cause)*  | 0·9% (0·5–1·2%)    | 3·7% (3–4·5%)      | 1·5% (1·3–2%)       | 0·2% (0·2–0·3%)    | 0·1% (0·1–0·2%)  |
| United Arab Emirates | Percent (proportion)† | 19·9%              | 11·9%              | 47·1%               | 13·9%              | 7·2%             |
|                      | Number                | 133 (53–334)       | 261 (157–476)      | 5974 (3589–9506)    | 644 (326–1037)     | 19 (10–30)       |
|                      | Percent (all-cause)*  | 0·5% (0·2–1·3%)    | 2% (1·2–3·7%)      | 0·8% (0·6–1·2%)     | 0·2% (0·1–0·3%)    | 0·1% (0–0·1%)    |
| Yemen                | Percent (proportion)† | 1·9%               | 3·7%               | 85·0%               | 9·2%               | 0·3%             |
|                      | Number                | 6677 (3137–10950)  | 5409 (3432–7957)   | 10198 (6003–14953)  | 1261 (791–1839)    | 266 (171–360)    |
|                      | Percent (all-cause)*  | 0·2% (0·1–0·3%)    | 1% (0·7–1·3%)      | 0·4% (0·3–0·6%)     | 0·1% (0·1–0·1%)    | 0% (0–0·1%)      |
| Afghanistan          | Percent (proportion)† | 28·0%              | 22·7%              | 42·8%               | 5·3%               | 1·1%             |
|                      | Number                | 18314 (6724–31266) | 10276 (6208–14956) | 25035 (11501–39475) | 2255 (1216–3297)   | 339 (229–482)    |
|                      | Percent (all-cause)*  | 0·3% (0·1–0·4%)    | 1·5% (0·9–2%)      | 0·8% (0·4–1%)       | 0·1% (0·1–0·2%)    | 0% (0–0·1%)      |
| Sudan                | Percent (proportion)† | 32·6%              | 18·3%              | 44·5%               | 4·0%               | 0·6%             |
|                      | Number                | 13528 (5831–22381) | 7426 (4530–11371)  | 15406 (9211–22980)  | 1627 (1043–2393)   | 401 (272–571)    |
|                      | Percent (all-cause)*  | 0·3% (0·1–0·4%)    | 1·7% (1·1–2·4%)    | 0·8% (0·6–1%)       | 0·1% (0·1–0·2%)    | 0% (0–0·1%)      |
|                      | Percent (proportion)† | 35·2%              | 19·3%              | 40·1%               | 4·2%               | 1·0%             |

DALYs, Disability-Adjusted Life Years; NC, neurological condition; UI, uncertainty interval; YLDs, Years Lived with Disability; YLLs, Years of Life Lost. Count data are absolute numbers and percentage data are rounded to one decimal place. Percentages and number of DALYs, YLDs, YLLs, deaths, incident cases, and prevalent cases are not mutually exclusive: the sum of percentages and number of DALYs, YLDs, YLLs, deaths, incident cases, and prevalent cases in the columns exceeds the totals for all causes combined because of overlap between various causes. Measures with insufficient data are not reported here. \*Percent of all-cause indicates the proportion of the specified measure (ie, DALYs, deaths, YDLs, or YLLs) of idiopathic epilepsy out of all causes in the age-group in the region/nation. †Percent proportion indicates the share of the specified measure (ie, DALYs, deaths, YDLs, or YLLs) of idiopathic epilepsy in different age-groups in the region/nation. Data in parentheses are 95% uncertainty intervals.

***Table S26 Age-specific disability and death related to multiple sclerosis in North Africa and Middle East countries in 2019***  
(NEXT PAGE)

**Table S26** Age-specific disability and death related to multiple sclerosis in North Africa and Middle East countries in 2019

|                                               |                       | Under 5       | 5-14 years        | 15-49 years            | 50-69 years            | 70+ years              |
|-----------------------------------------------|-----------------------|---------------|-------------------|------------------------|------------------------|------------------------|
|                                               |                       | Mean (95% UI) | Mean (95% UI)     | Mean (95% UI)          | Mean (95% UI)          | Mean (95% UI)          |
| <b>DALYs (Disability-Adjusted Life Years)</b> |                       |               |                   |                        |                        |                        |
| Global                                        | Number                |               | 8463 (1715–33264) | 522233 (432760–652880) | 495501 (430081–582567) | 133635 (110459–153369) |
|                                               | Percent (all-cause)*  |               | 0% (0–0%)         | 0.1% (0.1–0.1%)        | 0.1% (0.1–0.1%)        | 0% (0–0%)              |
|                                               | Percent (proportion)† |               | 0.7%              | 45.0%                  | 42.7%                  | 11.5%                  |
| North Africa and Middle East                  | Number                |               | 6292 (369–30700)  | 69619 (55707–85215)    | 33710 (27509–40801)    | 6264 (5129–7445)       |
|                                               | Percent (all-cause)*  |               | 0.1% (0–0.3%)     | 0.1% (0.1–0.1%)        | 0.1% (0.1–0.1%)        | 0% (0–0%)              |
|                                               | Percent (proportion)† |               | 5.4%              | 60.1%                  | 29.1%                  | 5.4%                   |
| Algeria                                       | Number                |               | 162 (20–848)      | 5401 (3609–7135)       | 2453 (1743–3202)       | 506 (346–662)          |
|                                               | Percent (all-cause)*  |               | 0% (0–0.2%)       | 0.1% (0.1–0.2%)        | 0.1% (0.1–0.1%)        | 0% (0–0%)              |
|                                               | Percent (proportion)† |               | 1.9%              | 63.4%                  | 28.8%                  | 5.9%                   |
| Bahrain                                       | Number                |               | 0 (0–1)           | 154 (109–213)          | 72 (51–94)             | 6 (4–8)                |
|                                               | Percent (all-cause)*  |               | 0% (0–0%)         | 0.1% (0.1–0.1%)        | 0.1% (0.1–0.1%)        | 0% (0–0%)              |
|                                               | Percent (proportion)† |               | 0.2%              | 66.4%                  | 30.8%                  | 2.6%                   |
| Egypt                                         | Number                |               | 4122 (52–26181)   | 6269 (4241–9668)       | 3471 (2168–6125)       | 473 (307–711)          |
|                                               | Percent (all-cause)*  |               | 0.2% (0–1.6%)     | 0.1% (0–0.1%)          | 0% (0–0.1%)            | 0% (0–0%)              |
|                                               | Percent (proportion)† |               | 28.8%             | 43.7%                  | 24.2%                  | 3.3%                   |
| Iran                                          | Number                |               | 270 (78–512)      | 16572 (13239–21688)    | 8447 (6686–11425)      | 1627 (1341–1980)       |
|                                               | Percent (all-cause)*  |               | 0% (0–0.1%)       | 0.2% (0.2–0.3%)        | 0.2% (0.1–0.2%)        | 0% (0–0.1%)            |
|                                               | Percent (proportion)† |               | 1.0%              | 61.6%                  | 31.4%                  | 6.0%                   |
| Iraq                                          | Number                |               | 35 (16–84)        | 3278 (2358–4489)       | 1346 (994–1764)        | 235 (166–319)          |
|                                               | Percent (all-cause)*  |               | 0% (0–0%)         | 0.1% (0.1–0.1%)        | 0.1% (0–0.1%)          | 0% (0–0%)              |
|                                               | Percent (proportion)† |               | 0.7%              | 67.0%                  | 27.5%                  | 4.8%                   |
| Jordan                                        | Number                |               | 9 (4–19)          | 1269 (868–1641)        | 540 (396–698)          | 86 (62–115)            |
|                                               | Percent (all-cause)*  |               | 0% (0–0%)         | 0.1% (0.1–0.2%)        | 0.1% (0.1–0.1%)        | 0% (0–0%)              |
|                                               | Percent (proportion)† |               | 0.5%              | 66.7%                  | 28.4%                  | 4.5%                   |
| Kuwait                                        | Number                |               | 4 (1–7)           | 651 (459–872)          | 209 (152–279)          | 30 (22–40)             |
|                                               | Percent (all-cause)*  |               | 0% (0–0%)         | 0.2% (0.1–0.2%)        | 0.1% (0.1–0.2%)        | 0% (0–0.1%)            |
|                                               | Percent (proportion)† |               | 0.4%              | 72.8%                  | 23.4%                  | 3.4%                   |
| Lebanon                                       | Number                |               | 17 (2–89)         | 732 (503–965)          | 393 (280–510)          | 127 (91–166)           |
|                                               | Percent (all-cause)*  |               | 0% (0–0.2%)       | 0.2% (0.1–0.2%)        | 0.1% (0.1–0.1%)        | 0% (0–0%)              |
|                                               | Percent (proportion)† |               | 1.3%              | 57.7%                  | 31.0%                  | 10.0%                  |
| Libya                                         | Number                |               | 19 (3–99)         | 1079 (709–1541)        | 431 (302–603)          | 75 (51–100)            |
|                                               | Percent (all-cause)*  |               | 0% (0–0.1%)       | 0.1% (0.1–0.2%)        | 0.1% (0.1–0.1%)        | 0% (0–0%)              |
|                                               | Percent (proportion)† |               | 1.2%              | 67.3%                  | 26.9%                  | 4.7%                   |
| Morocco                                       | Number                |               | 110 (17–620)      | 4206 (2853–5916)       | 2654 (1859–3477)       | 467 (317–629)          |
|                                               | Percent (all-cause)*  |               | 0% (0–0.1%)       | 0.1% (0.1–0.2%)        | 0.1% (0.1–0.1%)        | 0% (0–0%)              |
|                                               | Percent (proportion)† |               | 1.5%              | 56.5%                  | 35.7%                  | 6.3%                   |
| Palestine                                     | Number                |               | 12 (4–40)         | 492 (376–620)          | 192 (144–262)          | 29 (21–40)             |
|                                               | Percent (all-cause)*  |               | 0% (0–0.1%)       | 0.1% (0.1–0.2%)        | 0.1% (0.1–0.1%)        | 0% (0–0%)              |
|                                               | Percent (proportion)† |               | 1.7%              | 67.8%                  | 26.4%                  | 4.0%                   |
| Oman                                          | Number                |               | 13 (1–59)         | 553 (374–735)          | 144 (99–203)           | 18 (12–28)             |
|                                               | Percent (all-cause)*  |               | 0% (0–0.1%)       | 0.1% (0.1–0.1%)        | 0.1% (0.1–0.1%)        | 0% (0–0%)              |
|                                               | Percent (proportion)† |               | 1.8%              | 76.0%                  | 19.7%                  | 2.5%                   |
| Qatar                                         | Number                |               | 1 (0–1)           | 436 (307–584)          | 98 (69–131)            | 5 (4–7)                |
|                                               | Percent (all-cause)*  |               | 0% (0–0%)         | 0.1% (0.1–0.2%)        | 0.1% (0.1–0.1%)        | 0% (0–0%)              |
|                                               | Percent (proportion)† |               | 0.1%              | 80.7%                  | 18.2%                  | 1.0%                   |
| Saudi Arabia                                  | Number                |               | 10 (5–16)         | 3463 (2474–4641)       | 989 (734–1285)         | 98 (71–132)            |
|                                               | Percent (all-cause)*  |               | 0% (0–0%)         | 0.1% (0.1–0.1%)        | 0% (0–0.1%)            | 0% (0–0%)              |
|                                               | Percent (proportion)† |               | 0.2%              | 76.0%                  | 21.7%                  | 2.1%                   |
| Syrian Arab Republic                          | Number                |               | 10 (5–16)         | 1153 (849–1533)        | 854 (615–1123)         | 136 (97–186)           |
|                                               | Percent (all-cause)*  |               | 0% (0–0%)         | 0.1% (0.1–0.1%)        | 0.1% (0–0.1%)          | 0% (0–0%)              |
|                                               | Percent (proportion)† |               | 0.4%              | 53.6%                  | 39.7%                  | 6.3%                   |
| Tunisia                                       | Number                |               | 40 (5–172)        | 1633 (1135–2190)       | 1020 (725–1315)        | 245 (171–318)          |

**Table S26** Age-specific disability and death related to multiple sclerosis in North Africa and Middle East countries in 2019

|                              |                       | <b>Under 5</b> | <b>5-14 years</b> | <b>15-49 years</b> | <b>50-69 years</b> | <b>70+ years</b> |
|------------------------------|-----------------------|----------------|-------------------|--------------------|--------------------|------------------|
|                              |                       | Mean (95% UI)  | Mean (95% UI)     | Mean (95% UI)      | Mean (95% UI)      | Mean (95% UI)    |
| Türkiye                      | Percent (all-cause)*  |                | 0% (0–0.2%)       | 0.2% (0.1–0.2%)    | 0.1% (0.1–0.1%)    | 0% (0–0%)        |
|                              | Percent (proportion)† |                | 1.4%              | 55.6%              | 34.7%              | 8.3%             |
|                              | Number                |                | 673 (40–3705)     | 10281 (7968–12957) | 6857 (5385–8510)   | 1613 (1220–2091) |
|                              | Percent (all-cause)*  |                | 0.1% (0–0.6%)     | 0.2% (0.1–0.2%)    | 0.1% (0.1–0.1%)    | 0% (0–0%)        |
|                              | Percent (proportion)† |                | 3.5%              | 52.9%              | 35.3%              | 8.3%             |
|                              | Number                |                | 14 (1–69)         | 2326 (1380–3634)   | 476 (281–804)      | 11 (6–19)        |
| United Arab Emirates         | Percent (all-cause)*  |                | 0% (0–0.1%)       | 0.2% (0.1–0.2%)    | 0.1% (0.1–0.1%)    | 0% (0–0%)        |
|                              | Percent (proportion)† |                | 0.5%              | 82.3%              | 16.8%              | 0.4%             |
|                              | Number                |                | 170 (16–948)      | 2089 (1347–3091)   | 717 (485–960)      | 120 (79–160)     |
| Yemen                        | Percent (all-cause)*  |                | 0% (0–0.1%)       | 0.1% (0–0.1%)      | 0% (0–0.1%)        | 0% (0–0%)        |
|                              | Percent (proportion)† |                | 5.5%              | 67.5%              | 23.1%              | 3.9%             |
|                              | Number                |                | 378 (35–2032)     | 4694 (2790–9266)   | 1333 (854–2265)    | 170 (108–235)    |
| Afghanistan                  | Percent (all-cause)*  |                | 0% (0–0.2%)       | 0.1% (0.1–0.2%)    | 0.1% (0–0.1%)      | 0% (0–0%)        |
|                              | Percent (proportion)† |                | 5.8%              | 71.4%              | 20.3%              | 2.6%             |
|                              | Number                |                | 218 (21–1146)     | 2816 (1742–4086)   | 981 (649–1326)     | 179 (116–239)    |
| Sudan                        | Percent (all-cause)*  |                | 0% (0–0.1%)       | 0.1% (0–0.1%)      | 0.1% (0–0.1%)      | 0% (0–0%)        |
|                              | Percent (proportion)† |                | 5.2%              | 67.1%              | 23.4%              | 4.3%             |
|                              | Number                |                |                   |                    |                    |                  |
| <b>Deaths</b>                |                       |                |                   |                    |                    |                  |
| Global                       | Number                |                | 87 (8–386)        | 6039 (5281–8366)   | 10819 (9422–13366) | 5494 (4129–6300) |
|                              | Percent (all-cause)*  |                | 0% (0–0.1%)       | 0.1% (0.1–0.1%)    | 0.1% (0.1–0.1%)    | 0% (0–0%)        |
|                              | Percent (proportion)† |                | 0.4%              | 26.9%              | 48.2%              | 24.5%            |
| North Africa and Middle East | Number                |                | 75 (2–372)        | 667 (540–853)      | 521 (432–686)      | 174 (146–212)    |
|                              | Percent (all-cause)*  |                | 0.2% (0–0.7%)     | 0.1% (0.1–0.2%)    | 0.1% (0–0.1%)      | 0% (0–0%)        |
|                              | Percent (proportion)† |                | 5.2%              | 46.4%              | 36.3%              | 12.1%            |
| Algeria                      | Number                |                | 2 (0–10)          | 51 (26–75)         | 34 (18–47)         | 14 (7–20)        |
|                              | Percent (all-cause)*  |                | 0.1% (0–0.4%)     | 0.2% (0.1–0.2%)    | 0.1% (0–0.1%)      | 0% (0–0%)        |
|                              | Percent (proportion)† |                | 1.8%              | 50.4%              | 33.9%              | 13.9%            |
| Bahrain                      | Number                |                | <0.1 (<0.1–<0.1)  | 1 (1–1)            | 1 (0–1)            | <0.1 (<0.1–<0.1) |
|                              | Percent (all-cause)*  |                | 0% (0–0%)         | 0.1% (0.1–0.2%)    | 0% (0–0.1%)        | 0% (0–0%)        |
|                              | Percent (proportion)† |                | 0.1%              | 53.3%              | 39.6%              | 7.0%             |
| Egypt                        | Number                |                | 50 (0–320)        | 62 (33–129)        | 64 (31–147)        | 14 (8–30)        |
|                              | Percent (all-cause)*  |                | 0.6% (0–3.7%)     | 0.1% (0–0.2%)      | 0% (0–0.1%)        | 0% (0–0%)        |
|                              | Percent (proportion)† |                | 26.3%             | 32.3%              | 33.8%              | 7.6%             |
| Iran                         | Number                |                | 3 (1–6)           | 186 (151–275)      | 147 (117–238)      | 60 (49–80)       |
|                              | Percent (all-cause)*  |                | 0.1% (0–0.1%)     | 0.3% (0.3–0.5%)    | 0.1% (0.1–0.2%)    | 0% (0–0%)        |
|                              | Percent (proportion)† |                | 0.7%              | 47.1%              | 37.0%              | 15.2%            |
| Iraq                         | Number                |                | 0 (0–1)           | 21 (14–31)         | 15 (10–22)         | 4 (3–5)          |
|                              | Percent (all-cause)*  |                | 0% (0–0%)         | 0.1% (0–0.1%)      | 0% (0–0%)          | 0% (0–0%)        |
|                              | Percent (proportion)† |                | 0.5%              | 51.9%              | 37.9%              | 9.8%             |
| Jordan                       | Number                |                | <0.1 (<0.1–<0.1)  | 10 (5–13)          | 6 (4–8)            | 1 (1–2)          |
|                              | Percent (all-cause)*  |                | 0% (0–0%)         | 0.2% (0.1–0.3%)    | 0.1% (0–0.1%)      | 0% (0–0%)        |
|                              | Percent (proportion)† |                | 0.2%              | 55.3%              | 36.9%              | 7.6%             |
| Kuwait                       | Number                |                | <0.1 (<0.1–<0.1)  | 3 (2–4)            | 2 (1–2)            | 0 (0–1)          |
|                              | Percent (all-cause)*  |                | 0% (0–0.1%)       | 0.1% (0.1–0.2%)    | 0.1% (0–0.1%)      | 0% (0–0%)        |
|                              | Percent (proportion)† |                | 0.6%              | 54.6%              | 34.9%              | 9.9%             |
| Lebanon                      | Number                |                | 0 (0–1)           | 6 (3–9)            | 5 (3–8)            | 3 (2–5)          |
|                              | Percent (all-cause)*  |                | 0.1% (0–0.6%)     | 0.2% (0.1–0.3%)    | 0.1% (0–0.1%)      | 0% (0–0%)        |
|                              | Percent (proportion)† |                | 1.2%              | 41.5%              | 35.3%              | 21.9%            |
| Libya                        | Number                |                | 0 (0–1)           | 11 (6–20)          | 7 (4–12)           | 2 (1–4)          |
|                              | Percent (all-cause)*  |                | 0.1% (0–0.3%)     | 0.2% (0.1–0.3%)    | 0.1% (0–0.1%)      | 0% (0–0%)        |
|                              | Percent (proportion)† |                | 1.0%              | 54.2%              | 33.7%              | 11.1%            |
| Morocco                      | Number                |                | 1 (0–7)           | 39 (19–67)         | 44 (24–62)         | 15 (7–21)        |
|                              | Percent (all-cause)*  |                | 0.1% (0–0.4%)     | 0.1% (0.1–0.2%)    | 0.1% (0–0.1%)      | 0% (0–0%)        |

**Table S26** Age-specific disability and death related to multiple sclerosis in North Africa and Middle East countries in 2019

|                                           |                       | <b>Under 5</b> | <b>5-14 years</b> | <b>15-49 years</b>     | <b>50-69 years</b>     | <b>70+ years</b>    |
|-------------------------------------------|-----------------------|----------------|-------------------|------------------------|------------------------|---------------------|
|                                           |                       | Mean (95% UI)  | Mean (95% UI)     | Mean (95% UI)          | Mean (95% UI)          | Mean (95% UI)       |
| Palestine                                 | Percent (proportion)† |                | 1·2%              | 39·5%                  | 44·5%                  | 14·8%               |
|                                           | Number                |                | <0·1 (<0·1–<0·1)  | 5 (3–6)                | 3 (2–5)                | 1 (0–1)             |
|                                           | Percent (all-cause)*  |                | 0% (0–0·2%)       | 0·2% (0·1–0·2%)        | 0·1% (0–0·1%)          | 0% (0–0%)           |
| Oman                                      | Percent (proportion)† |                | 1·5%              | 55·6%                  | 34·6%                  | 8·3%                |
|                                           | Number                |                | 0 (0–1)           | 5 (2–7)                | 2 (1–4)                | 1 (0–1)             |
|                                           | Percent (all-cause)*  |                | 0·1% (0–0·4%)     | 0·1% (0·1–0·2%)        | 0·1% (0–0·1%)          | 0% (0–0%)           |
| Qatar                                     | Percent (proportion)† |                | 1·9%              | 61·5%                  | 29·0%                  | 7·6%                |
|                                           | Number                |                | <0·1 (<0·1–<0·1)  | 1 (1–2)                | 1 (0–1)                | <0·1 (<0·1–<0·1)    |
|                                           | Percent (all-cause)*  |                | 0% (0–0%)         | 0·1% (0–0·1%)          | 0% (0–0%)              | 0% (0–0%)           |
| Saudi Arabia                              | Percent (proportion)† |                | 0·1%              | 65·3%                  | 30·9%                  | 3·7%                |
|                                           | Number                |                | <0·1 (<0·1–<0·1)  | 26 (17–41)             | 12 (9–17)              | 2 (1–3)             |
|                                           | Percent (all-cause)*  |                | 0% (0–0%)         | 0·1% (0–0·1%)          | 0% (0–0%)              | 0% (0–0%)           |
| Syrian Arab Republic                      | Percent (proportion)† |                | 0·0%              | 65·1%                  | 29·9%                  | 4·9%                |
|                                           | Number                |                | <0·1 (<0·1–<0·1)  | 6 (5–9)                | 10 (6–14)              | 2 (1–3)             |
|                                           | Percent (all-cause)*  |                | 0% (0–0%)         | 0·1% (0·1–0·1%)        | 0% (0–0%)              | 0% (0–0%)           |
| Tunisia                                   | Percent (proportion)† |                | 0·1%              | 35·3%                  | 53·6%                  | 11·0%               |
|                                           | Number                |                | 0 (0–2)           | 14 (8–22)              | 14 (7–20)              | 6 (3–9)             |
|                                           | Percent (all-cause)*  |                | 0·1% (0–0·5%)     | 0·2% (0·1–0·3%)        | 0·1% (0–0·1%)          | 0% (0–0%)           |
| Türkiye                                   | Percent (proportion)† |                | 1·3%              | 41·3%                  | 39·5%                  | 17·9%               |
|                                           | Number                |                | 8 (0–45)          | 78 (58–111)            | 88 (64–127)            | 32 (21–56)          |
|                                           | Percent (all-cause)*  |                | 0·3% (0–1·9%)     | 0·2% (0·2–0·3%)        | 0·1% (0·1–0·1%)        | 0% (0–0%)           |
| United Arab Emirates                      | Percent (proportion)† |                | 3·9%              | 38·0%                  | 42·8%                  | 15·3%               |
|                                           | Number                |                | 0 (0–1)           | 34 (15–60)             | 10 (4–19)              | 0 (0–1)             |
|                                           | Percent (all-cause)*  |                | 0·1% (0–0·5%)     | 0·2% (0·1–0·4%)        | 0·1% (0–0·2%)          | 0% (0–0%)           |
| Yemen                                     | Percent (proportion)† |                | 0·4%              | 76·4%                  | 22·3%                  | 0·9%                |
|                                           | Number                |                | 2 (0–11)          | 22 (10–38)             | 13 (7–20)              | 4 (2–5)             |
|                                           | Percent (all-cause)*  |                | 0% (0–0·2%)       | 0·1% (0–0·1%)          | 0% (0–0%)              | 0% (0–0%)           |
| Afghanistan                               | Percent (proportion)† |                | 4·8%              | 54·0%                  | 32·1%                  | 9·1%                |
|                                           | Number                |                | 4 (0–25)          | 55 (19–139)            | 25 (12–51)             | 6 (2–9)             |
|                                           | Percent (all-cause)*  |                | 0·1% (0–0·3%)     | 0·1% (0–0·2%)          | 0% (0–0·1%)            | 0% (0–0%)           |
| Sudan                                     | Percent (proportion)† |                | 4·9%              | 61·0%                  | 27·9%                  | 6·3%                |
|                                           | Number                |                | 3 (0–14)          | 30 (12–52)             | 18 (9–27)              | 6 (3–9)             |
|                                           | Percent (all-cause)*  |                | 0% (0–0·3%)       | 0·1% (0–0·1%)          | 0% (0–0·1%)            | 0% (0–0%)           |
|                                           | Percent (proportion)† |                | 4·4%              | 53·4%                  | 31·5%                  | 10·7%               |
| <b>YLDs (Years Lived with Disability)</b> |                       |                |                   |                        |                        |                     |
| Global                                    | Number                |                | 1444 (768–2409)   | 228548 (158500–305838) | 168937 (120355–219306) | 52275 (37821–67675) |
|                                           | Percent (all-cause)*  |                | 0% (0–0%)         | 0·1% (0–0·1%)          | 0·1% (0·1–0·1%)        | 0% (0–0·1%)         |
|                                           | Percent (proportion)† |                | 0·3%              | 50·7%                  | 37·4%                  | 11·6%               |
| North Africa and Middle East              | Number                |                | 221 (114–356)     | 36295 (25110–49080)    | 17354 (12170–22654)    | 3818 (2767–4960)    |
|                                           | Percent (all-cause)*  |                | 0% (0–0%)         | 0·1% (0·1–0·1%)        | 0·1% (0·1–0·2%)        | 0·1% (0·1–0·1%)     |
|                                           | Percent (proportion)† |                | 0·4%              | 62·9%                  | 30·1%                  | 6·6%                |
| Algeria                                   | Number                |                | 14 (7–23)         | 2838 (1791–4057)       | 1382 (896–1958)        | 312 (206–446)       |
|                                           | Percent (all-cause)*  |                | 0% (0–0%)         | 0·1% (0·1–0·2%)        | 0·1% (0·1–0·2%)        | 0·1% (0–0·1%)       |
|                                           | Percent (proportion)† |                | 0·3%              | 62·4%                  | 30·4%                  | 6·9%                |
| Bahrain                                   | Number                |                | <0·1 (<0·1–<0·1)  | 104 (65–153)           | 46 (30–65)             | 4 (3–6)             |
|                                           | Percent (all-cause)*  |                | 0% (0–0%)         | 0·1% (0·1–0·2%)        | 0·1% (0·1–0·1%)        | 0·1% (0–0·1%)       |
|                                           | Percent (proportion)† |                | 0·2%              | 67·2%                  | 30·0%                  | 2·6%                |
| Egypt                                     | Number                |                | 30 (15–49)        | 3052 (1940–4452)       | 1463 (959–2062)        | 248 (155–345)       |
|                                           | Percent (all-cause)*  |                | 0% (0–0%)         | 0·1% (0–0·1%)          | 0·1% (0–0·1%)          | 0% (0–0·1%)         |
|                                           | Percent (proportion)† |                | 0·6%              | 63·7%                  | 30·5%                  | 5·2%                |
| Iran                                      | Number                |                | 33 (17–52)        | 7245 (5010–9794)       | 3883 (2741–5134)       | 810 (573–1053)      |
|                                           | Percent (all-cause)*  |                | 0% (0–0%)         | 0·1% (0·1–0·2%)        | 0·2% (0·1–0·2%)        | 0·1% (0·1–0·1%)     |



**Table S26** Age-specific disability and death related to multiple sclerosis in North Africa and Middle East countries in 2019

|                      |                       | <b>Under 5</b> | <b>5-14 years</b> | <b>15-49 years</b> | <b>50-69 years</b> | <b>70+ years</b> |
|----------------------|-----------------------|----------------|-------------------|--------------------|--------------------|------------------|
|                      |                       | Mean (95% UI)  | Mean (95% UI)     | Mean (95% UI)      | Mean (95% UI)      | Mean (95% UI)    |
| Iraq                 | Percent (proportion)† |                | 0.3%              | 60.5%              | 32.4%              | 6.8%             |
|                      | Number                |                | 20 (10–33)        | 2261 (1419–3350)   | 860 (542–1240)     | 178 (112–253)    |
|                      | Percent (all-cause)*  |                | 0% (0–0%)         | 0.1% (0.1–0.1%)    | 0.1% (0.1–0.2%)    | 0.1% (0.0–0.1%)  |
| Jordan               | Percent (proportion)† |                | 0.6%              | 68.1%              | 25.9%              | 5.4%             |
|                      | Number                |                | 6 (3–10)          | 793 (491–1138)     | 333 (208–478)      | 66 (43–94)       |
|                      | Percent (all-cause)*  |                | 0% (0–0%)         | 0.1% (0.1–0.2%)    | 0.2% (0.1–0.2%)    | 0.1% (0.1–0.1%)  |
| Kuwait               | Percent (proportion)† |                | 0.5%              | 66.2%              | 27.8%              | 5.5%             |
|                      | Number                |                | 2 (1–3)           | 522 (339–742)      | 154 (100–222)      | 23 (15–32)       |
|                      | Percent (all-cause)*  |                | 0% (0–0%)         | 0.2% (0.1–0.2%)    | 0.2% (0.1–0.2%)    | 0.1% (0.1–0.1%)  |
| Lebanon              | Percent (proportion)† |                | 0.2%              | 74.5%              | 22.0%              | 3.3%             |
|                      | Number                |                | 2 (1–3)           | 422 (273–605)      | 233 (150–325)      | 82 (54–114)      |
|                      | Percent (all-cause)*  |                | 0% (0–0%)         | 0.1% (0.1–0.2%)    | 0.2% (0.1–0.2%)    | 0.1% (0.1–0.1%)  |
| Libya                | Percent (proportion)† |                | 0.3%              | 57.1%              | 31.5%              | 11.2%            |
|                      | Number                |                | 2 (1–3)           | 518 (333–738)      | 206 (134–288)      | 43 (28–59)       |
|                      | Percent (all-cause)*  |                | 0% (0–0%)         | 0.1% (0.1–0.2%)    | 0.1% (0.1–0.2%)    | 0.1% (0.0–0.1%)  |
| Morocco              | Percent (proportion)† |                | 0.3%              | 67.4%              | 26.8%              | 5.6%             |
|                      | Number                |                | 14 (7–24)         | 2290 (1477–3275)   | 1290 (821–1811)    | 259 (160–373)    |
|                      | Percent (all-cause)*  |                | 0% (0–0%)         | 0.1% (0.1–0.2%)    | 0.1% (0.1–0.2%)    | 0.1% (0.0–0.1%)  |
| Palestine            | Percent (proportion)† |                | 0.4%              | 59.4%              | 33.5%              | 6.7%             |
|                      | Number                |                | 3 (1–4)           | 261 (169–376)      | 103 (66–144)       | 19 (12–28)       |
|                      | Percent (all-cause)*  |                | 0% (0–0%)         | 0.1% (0.1–0.1%)    | 0.1% (0.1–0.2%)    | 0.1% (0.0–0.1%)  |
| Oman                 | Percent (proportion)† |                | 0.7%              | 67.7%              | 26.6%              | 5.0%             |
|                      | Number                |                | 1 (0–2)           | 309 (199–448)      | 74 (48–106)        | 9 (6–14)         |
|                      | Percent (all-cause)*  |                | 0% (0–0%)         | 0.1% (0.1–0.1%)    | 0.1% (0.1–0.2%)    | 0.1% (0.0–0.1%)  |
| Qatar                | Percent (proportion)† |                | 0.2%              | 78.7%              | 18.7%              | 2.4%             |
|                      | Number                |                | 1 (0–1)           | 379 (252–527)      | 81 (53–114)        | 4 (3–6)          |
|                      | Percent (all-cause)*  |                | 0% (0–0%)         | 0.2% (0.1–0.2%)    | 0.2% (0.1–0.2%)    | 0.1% (0.1–0.1%)  |
| Saudi Arabia         | Percent (proportion)† |                | 0.1%              | 81.5%              | 17.4%              | 0.9%             |
|                      | Number                |                | 8 (4–13)          | 2167 (1350–3192)   | 598 (366–860)      | 68 (43–100)      |
|                      | Percent (all-cause)*  |                | 0% (0–0%)         | 0.1% (0.1–0.1%)    | 0.1% (0.1–0.1%)    | 0% (0.0–0.1%)    |
| Syrian Arab Republic | Percent (proportion)† |                | 0.3%              | 76.3%              | 21.0%              | 2.4%             |
|                      | Number                |                | 8 (4–13)          | 843 (542–1194)     | 554 (350–799)      | 106 (67–154)     |
|                      | Percent (all-cause)*  |                | 0% (0–0%)         | 0.1% (0.1–0.1%)    | 0.1% (0.1–0.2%)    | 0.1% (0.0–0.1%)  |
| Tunisia              | Percent (proportion)† |                | 0.5%              | 55.8%              | 36.7%              | 7.0%             |
|                      | Number                |                | 4 (2–7)           | 921 (604–1311)     | 600 (400–832)      | 157 (105–221)    |
|                      | Percent (all-cause)*  |                | 0% (0–0%)         | 0.1% (0.1–0.2%)    | 0.2% (0.1–0.2%)    | 0.1% (0.1–0.1%)  |
| Türkiye              | Percent (proportion)† |                | 0.2%              | 54.7%              | 35.7%              | 9.3%             |
|                      | Number                |                | 25 (14–39)        | 6468 (4455–8759)   | 4096 (2825–5605)   | 1182 (833–1600)  |
|                      | Percent (all-cause)*  |                | 0% (0–0%)         | 0.1% (0.1–0.2%)    | 0.2% (0.1–0.2%)    | 0.1% (0.1–0.1%)  |
| United Arab Emirates | Percent (proportion)† |                | 0.2%              | 55.0%              | 34.8%              | 10.0%            |
|                      | Number                |                | 1 (0–2)           | 679 (434–964)      | 147 (90–218)       | 4 (3–6)          |
|                      | Percent (all-cause)*  |                | 0% (0–0%)         | 0.1% (0.1–0.1%)    | 0.1% (0.1–0.1%)    | 0% (0.0–0.1%)    |
| Yemen                | Percent (proportion)† |                | 0.1%              | 81.7%              | 17.7%              | 0.5%             |
|                      | Number                |                | 11 (5–19)         | 973 (615–1436)     | 304 (196–425)      | 63 (41–89)       |
|                      | Percent (all-cause)*  |                | 0% (0–0%)         | 0.1% (0.0–0.1%)    | 0.1% (0.0–0.1%)    | 0% (0.0–0.1%)    |
| Afghanistan          | Percent (proportion)† |                | 0.8%              | 72.0%              | 22.5%              | 4.6%             |
|                      | Number                |                | 24 (12–40)        | 1941 (1229–2787)   | 507 (321–721)      | 85 (52–124)      |
|                      | Percent (all-cause)*  |                | 0% (0–0%)         | 0.1% (0.1–0.1%)    | 0.1% (0.1–0.1%)    | 0.1% (0.0–0.1%)  |
| Sudan                | Percent (proportion)† |                | 0.9%              | 75.9%              | 19.8%              | 3.3%             |
|                      | Number                |                | 13 (7–23)         | 1272 (815–1846)    | 422 (268–603)      | 91 (60–126)      |
|                      | Percent (all-cause)*  |                | 0% (0–0%)         | 0.1% (0.0–0.1%)    | 0.1% (0.0–0.1%)    | 0% (0.0–0.1%)    |
|                      | Percent (proportion)† |                | 0.7%              | 70.8%              | 23.5%              | 5.0%             |

**YLLs (Years of Life Lost)**

**Table S26** Age-specific disability and death related to multiple sclerosis in North Africa and Middle East countries in 2019

|                              |                       | <b>Under 5</b> | <b>5-14 years</b> | <b>15-49 years</b>     | <b>50-69 years</b>     | <b>70+ years</b>    |
|------------------------------|-----------------------|----------------|-------------------|------------------------|------------------------|---------------------|
|                              |                       | Mean (95% UI)  | Mean (95% UI)     | Mean (95% UI)          | Mean (95% UI)          | Mean (95% UI)       |
| Global                       | Number                |                | 7020 (634–31493)  | 293684 (256630–402068) | 326564 (286720–408544) | 81360 (60548–92996) |
|                              | Percent (all-cause)*  |                | 0% (0–0.1%)       | 0.1% (0.1–0.1%)        | 0.1% (0.1–0.1%)        | 0% (0–0%)           |
|                              | Percent (proportion)† |                | 1.0%              | 41.4%                  | 46.1%                  | 11.5%               |
| North Africa and Middle East | Number                |                | 6071 (185–30374)  | 33324 (26924–42587)    | 16356 (13496–21539)    | 2447 (2061–3018)    |
|                              | Percent (all-cause)*  |                | 0.2% (0–0.8%)     | 0.1% (0.1–0.1%)        | 0.1% (0.1–0.1%)        | 0% (0–0%)           |
|                              | Percent (proportion)† |                | 10.4%             | 57.3%                  | 28.1%                  | 4.2%                |
| Algeria                      | Number                |                | 148 (9–834)       | 2563 (1291–3724)       | 1071 (570–1475)        | 193 (91–276)        |
|                              | Percent (all-cause)*  |                | 0.1% (0–0.4%)     | 0.2% (0.1–0.2%)        | 0.1% (0–0.1%)          | 0% (0–0%)           |
|                              | Percent (proportion)† |                | 3.7%              | 64.5%                  | 26.9%                  | 4.9%                |
| Bahrain                      | Number                |                | <0.1 (<0.1–<0.1)  | 51 (29–71)             | 25 (14–35)             | 2 (1–3)             |
|                              | Percent (all-cause)*  |                | 0% (0–0%)         | 0.1% (0.1–0.2%)        | 0.1% (0–0.1%)          | 0% (0–0%)           |
|                              | Percent (proportion)† |                | 0.1%              | 64.9%                  | 32.4%                  | 2.6%                |
| Egypt                        | Number                |                | 4092 (25–26145)   | 3217 (1765–6385)       | 2009 (961–4627)        | 225 (117–466)       |
|                              | Percent (all-cause)*  |                | 0.6% (0–3.9%)     | 0.1% (0–0.1%)          | 0% (0–0.1%)            | 0% (0–0%)           |
|                              | Percent (proportion)† |                | 42.9%             | 33.7%                  | 21.0%                  | 2.4%                |
| Iran                         | Number                |                | 237 (48–475)      | 9327 (7639–13501)      | 4563 (3630–7457)       | 817 (684–1107)      |
|                              | Percent (all-cause)*  |                | 0.1% (0–0.1%)     | 0.3% (0.2–0.4%)        | 0.2% (0.1–0.3%)        | 0% (0–0%)           |
|                              | Percent (proportion)† |                | 1.6%              | 62.4%                  | 30.5%                  | 5.5%                |
| Iraq                         | Number                |                | 15 (2–63)         | 1017 (684–1529)        | 486 (332–701)          | 56 (43–76)          |
|                              | Percent (all-cause)*  |                | 0% (0–0%)         | 0% (0–0.1%)            | 0% (0–0%)              | 0% (0–0%)           |
|                              | Percent (proportion)† |                | 0.9%              | 64.6%                  | 30.9%                  | 3.6%                |
| Jordan                       | Number                |                | 3 (0–12)          | 476 (262–641)          | 207 (129–272)          | 20 (14–26)          |
|                              | Percent (all-cause)*  |                | 0% (0–0%)         | 0.2% (0.1–0.2%)        | 0.1% (0–0.1%)          | 0% (0–0%)           |
|                              | Percent (proportion)† |                | 0.4%              | 67.5%                  | 29.3%                  | 2.9%                |
| Kuwait                       | Number                |                | 2 (0–6)           | 129 (94–195)           | 55 (40–80)             | 7 (5–9)             |
|                              | Percent (all-cause)*  |                | 0% (0–0.1%)       | 0.1% (0.1–0.2%)        | 0.1% (0–0.1%)          | 0% (0–0%)           |
|                              | Percent (proportion)† |                | 1.2%              | 66.8%                  | 28.5%                  | 3.6%                |
| Lebanon                      | Number                |                | 15 (1–87)         | 310 (155–461)          | 161 (88–237)           | 45 (23–71)          |
|                              | Percent (all-cause)*  |                | 0.1% (0–0.6%)     | 0.2% (0.1–0.3%)        | 0.1% (0–0.1%)          | 0% (0–0%)           |
|                              | Percent (proportion)† |                | 2.8%              | 58.5%                  | 30.3%                  | 8.5%                |
| Libya                        | Number                |                | 17 (1–97)         | 561 (267–988)          | 225 (116–371)          | 33 (15–49)          |
|                              | Percent (all-cause)*  |                | 0.1% (0–0.3%)     | 0.1% (0.1–0.2%)        | 0.1% (0–0.1%)          | 0% (0–0%)           |
|                              | Percent (proportion)† |                | 2.0%              | 67.1%                  | 26.9%                  | 3.9%                |
| Morocco                      | Number                |                | 96 (6–609)        | 1915 (914–3329)        | 1364 (742–1942)        | 209 (96–295)        |
|                              | Percent (all-cause)*  |                | 0.1% (0–0.4%)     | 0.1% (0.1–0.2%)        | 0.1% (0–0.1%)          | 0% (0–0%)           |
|                              | Percent (proportion)† |                | 2.7%              | 53.4%                  | 38.1%                  | 5.8%                |
| Palestine                    | Number                |                | 10 (2–39)         | 231 (160–296)          | 89 (62–153)            | 10 (7–20)           |
|                              | Percent (all-cause)*  |                | 0% (0–0.2%)       | 0.2% (0.1–0.2%)        | 0.1% (0–0.1%)          | 0% (0–0%)           |
|                              | Percent (proportion)† |                | 2.9%              | 68.0%                  | 26.2%                  | 2.9%                |
| Oman                         | Number                |                | 12 (0–58)         | 245 (116–363)          | 70 (36–121)            | 9 (4–19)            |
|                              | Percent (all-cause)*  |                | 0.1% (0–0.4%)     | 0.1% (0.1–0.2%)        | 0.1% (0–0.1%)          | 0% (0–0%)           |
|                              | Percent (proportion)† |                | 3.5%              | 72.8%                  | 20.9%                  | 2.7%                |
| Qatar                        | Number                |                | <0.1 (<0.1–<0.1)  | 57 (38–86)             | 17 (11–25)             | 1 (1–1)             |
|                              | Percent (all-cause)*  |                | 0% (0–0%)         | 0.1% (0–0.1%)          | 0% (0–0.1%)            | 0% (0–0%)           |
|                              | Percent (proportion)† |                | 0.2%              | 75.4%                  | 23.0%                  | 1.4%                |
| Saudi Arabia                 | Number                |                | 2 (0–6)           | 1295 (840–2036)        | 391 (273–544)          | 30 (19–40)          |
|                              | Percent (all-cause)*  |                | 0% (0–0%)         | 0% (0–0.1%)            | 0% (0–0%)              | 0% (0–0%)           |
|                              | Percent (proportion)† |                | 0.1%              | 75.4%                  | 22.8%                  | 1.7%                |
| Syrian Arab Republic         | Number                |                | 2 (0–6)           | 311 (218–438)          | 299 (184–425)          | 30 (22–39)          |
|                              | Percent (all-cause)*  |                | 0% (0–0%)         | 0.1% (0–0.1%)          | 0% (0–0%)              | 0% (0–0%)           |
|                              | Percent (proportion)† |                | 0.3%              | 48.4%                  | 46.6%                  | 4.7%                |
| Tunisia                      | Number                |                | 36 (2–168)        | 712 (373–1096)         | 420 (223–631)          | 87 (41–132)         |

**Table S26** Age-specific disability and death related to multiple sclerosis in North Africa and Middle East countries in 2019

|                      |                       | <b>Under 5</b> | <b>5-14 years</b> | <b>15-49 years</b> | <b>50-69 years</b> | <b>70+ years</b> |
|----------------------|-----------------------|----------------|-------------------|--------------------|--------------------|------------------|
|                      |                       | Mean (95% UI)  | Mean (95% UI)     | Mean (95% UI)      | Mean (95% UI)      | Mean (95% UI)    |
| Türkiye              | Percent (all-cause)*  |                | 0·1% (0–0·5%)     | 0·2% (0·1–0·3%)    | 0·1% (0–0·1%)      | 0% (0–0%)        |
|                      | Percent (proportion)† |                | 2·9%              | 56·7%              | 33·5%              | 7·0%             |
|                      | Number                |                | 648 (19–3687)     | 3813 (2816–5362)   | 2761 (2009–3966)   | 432 (287–766)    |
|                      | Percent (all-cause)*  |                | 0·3% (0–2%)       | 0·2% (0·2–0·3%)    | 0·1% (0·1–0·1%)    | 0% (0–0%)        |
| United Arab Emirates | Percent (proportion)† |                | 8·5%              | 49·8%              | 36·1%              | 5·6%             |
|                      | Number                |                | 13 (0–69)         | 1647 (752–2913)    | 329 (140–644)      | 7 (2–15)         |
|                      | Percent (all-cause)*  |                | 0·1% (0–0·5%)     | 0·2% (0·1–0·4%)    | 0·1% (0–0·2%)      | 0% (0–0%)        |
| Yemen                | Percent (proportion)† |                | 0·6%              | 82·5%              | 16·5%              | 0·3%             |
|                      | Number                |                | 159 (7–939)       | 1116 (501–1933)    | 412 (215–637)      | 57 (25–84)       |
|                      | Percent (all-cause)*  |                | 0% (0–0·2%)       | 0% (0–0·1%)        | 0% (0–0·1%)        | 0% (0–0%)        |
| Afghanistan          | Percent (proportion)† |                | 9·1%              | 64·0%              | 23·6%              | 3·3%             |
|                      | Number                |                | 354 (14–2001)     | 2753 (946–7079)    | 826 (394–1703)     | 85 (32–136)      |
|                      | Percent (all-cause)*  |                | 0·1% (0–0·3%)     | 0·1% (0–0·2%)      | 0·1% (0–0·1%)      | 0% (0–0%)        |
| Sudan                | Percent (proportion)† |                | 8·8%              | 68·5%              | 20·6%              | 2·1%             |
|                      | Number                |                | 204 (10–1134)     | 1544 (601–2659)    | 560 (282–849)      | 89 (39–137)      |
|                      | Percent (all-cause)*  |                | 0% (0–0·3%)       | 0·1% (0–0·1%)      | 0% (0–0·1%)        | 0% (0–0%)        |
|                      | Percent (proportion)† |                | 8·5%              | 64·4%              | 23·4%              | 3·7%             |

DALYs, Disability-Adjusted Life Years; NC, neurological condition; UI, uncertainty interval; YLDs, Years Lived with Disability; YLLs, Years of Life Lost. Count data are absolute numbers and percentage data are rounded to one decimal place. Percentages and number of DALYs, deaths, YLDs, and YLLs are not mutually exclusive: the sum of percentages and number of DALYs, deaths, YLDs, and YLLs in the columns exceeds the totals for all causes combined because of overlap between various causes. Measures with insufficient data are not reported here. \* Percent of all-cause indicates the proportion of the specified measure (ie, DALYs, deaths, YDLs, or YLLs) of multiple sclerosis out of all causes in the age-group in the region/nation. † Percent proportion indicates the share of the specified measure (ie, DALYs, deaths, YDLs, or YLLs) of multiple sclerosis in different age-groups in the region/nation. Data in parentheses are 95% uncertainty intervals.

***Table S27 Age-specific disability related to headache disorders in North Africa and Middle East countries in 2019***

(NEXT PAGE)

**Table S27** Age-specific disability related to headache disorders in North Africa and Middle East countries in 2019

|                                               |                       | <b>Under 5</b> | <b>5-14 years</b>        | <b>15-49 years</b>          | <b>50-69 years</b>         | <b>70+ years</b>         |
|-----------------------------------------------|-----------------------|----------------|--------------------------|-----------------------------|----------------------------|--------------------------|
|                                               |                       | Mean (95% UI)  | Mean (95% UI)            | Mean (95% UI)               | Mean (95% UI)              | Mean (95% UI)            |
| <b>DALYs (Disability-Adjusted Life Years)</b> |                       |                |                          |                             |                            |                          |
| Global                                        | Number                |                | 3498167 (169001–8587733) | 32008633 (6002309–69417118) | 9446252 (2809899–19653634) | 1666302 (562136–3418126) |
|                                               | Percent (all-cause)*  |                | 2.9% (0.1–6.8%)          | 4% (0.8–8.3%)               | 1.4% (0.4–2.9%)            | 0.3% (0.1–0.7%)          |
|                                               | Percent (proportion)† |                | 7.5%                     | 68.7%                       | 20.3%                      | 3.6%                     |
| North Africa and Middle East                  | Number                |                | 423677 (20740–1106941)   | 3121116 (726209–6761669)    | 584504 (192079–1211309)    | 80506 (28725–162504)     |
|                                               | Percent (all-cause)*  |                | 4.4% (0.2–10.5%)         | 4.9% (1.2–10.1%)            | 1.4% (0.5–2.9%)            | 0.4% (0.1–0.7%)          |
|                                               | Percent (proportion)† |                | 10.1%                    | 74.1%                       | 13.9%                      | 1.9%                     |
| Algeria                                       | Number                |                | 25960 (1358–67811)       | 211710 (49154–457494)       | 44263 (14125–92240)        | 6490 (2197–13078)        |
|                                               | Percent (all-cause)*  |                | 4.9% (0.3–11.6%)         | 5.5% (1.4–11.2%)            | 1.8% (0.6–3.7%)            | 0.4% (0.1–0.8%)          |
|                                               | Percent (proportion)† |                | 9.0%                     | 73.4%                       | 15.3%                      | 2.3%                     |
| Bahrain                                       | Number                |                | 600 (30–1574)            | 8116 (1979–17147)           | 1764 (569–3711)            | 95 (33–196)              |
|                                               | Percent (all-cause)*  |                | 6% (0.3–14%)             | 5.7% (1.5–11.3%)            | 1.8% (0.6–3.7%)            | 0.3% (0.1–0.7%)          |
|                                               | Percent (proportion)† |                | 5.7%                     | 76.7%                       | 16.7%                      | 0.9%                     |
| Egypt                                         | Number                |                | 91694 (3873–239916)      | 494747 (108032–1091253)     | 88047 (29163–181483)       | 10306 (3646–20614)       |
|                                               | Percent (all-cause)*  |                | 5.4% (0.3–12.8%)         | 5.4% (1.3–11%)              | 1% (0.3–2.1%)              | 0.3% (0.1–0.6%)          |
|                                               | Percent (proportion)† |                | 13.4%                    | 72.2%                       | 12.9%                      | 1.5%                     |
| Iran                                          | Number                |                | 43717 (2422–111116)      | 477225 (116735–1018314)     | 105648 (34277–215376)      | 15247 (5386–30567)       |
|                                               | Percent (all-cause)*  |                | 4.6% (0.3–10.6%)         | 5.6% (1.4–10.9%)            | 2% (0.7–3.9%)              | 0.4% (0.2–0.9%)          |
|                                               | Percent (proportion)† |                | 6.8%                     | 74.4%                       | 16.5%                      | 2.4%                     |
| Iraq                                          | Number                |                | 32534 (1595–85882)       | 212071 (46972–469338)       | 30905 (9914–64550)         | 4009 (1409–8261)         |
|                                               | Percent (all-cause)*  |                | 4.4% (0.2–10.6%)         | 4.7% (1.1–9.7%)             | 1.3% (0.4–2.6%)            | 0.3% (0.1–0.7%)          |
|                                               | Percent (proportion)† |                | 11.6%                    | 75.9%                       | 11.1%                      | 1.4%                     |
| Jordan                                        | Number                |                | 9150 (448–24013)         | 57712 (13055–125698)        | 9481 (3045–20246)          | 1152 (398–2339)          |
|                                               | Percent (all-cause)*  |                | 5.5% (0.3–13%)           | 6.5% (1.6–13%)              | 1.9% (0.6–4%)              | 0.4% (0.2–0.9%)          |
|                                               | Percent (proportion)† |                | 11.8%                    | 74.5%                       | 12.2%                      | 1.5%                     |
| Kuwait                                        | Number                |                | 1975 (95–5212)           | 26787 (6125–58023)          | 3857 (1171–8132)           | 343 (116–722)            |
|                                               | Percent (all-cause)*  |                | 5.8% (0.3–13.8%)         | 6.4% (1.5–12.5%)            | 2.2% (0.7–4.5%)            | 0.4% (0.1–0.9%)          |
|                                               | Percent (proportion)† |                | 6.0%                     | 81.3%                       | 11.7%                      | 1.0%                     |
| Lebanon                                       | Number                |                | 3036 (163–7982)          | 25338 (5840–54834)          | 5882 (1916–12240)          | 1289 (453–2638)          |
|                                               | Percent (all-cause)*  |                | 5.9% (0.3–13.9%)         | 5.5% (1.3–11.2%)            | 1.5% (0.5–3.2%)            | 0.4% (0.1–0.7%)          |
|                                               | Percent (proportion)† |                | 8.5%                     | 71.3%                       | 16.5%                      | 3.6%                     |
| Libya                                         | Number                |                | 3944 (199–10329)         | 38170 (8920–83341)          | 6787 (2198–14239)          | 911 (315–1861)           |
|                                               | Percent (all-cause)*  |                | 4.9% (0.2–11.5%)         | 4.5% (1.1–9%)               | 1.6% (0.5–3.2%)            | 0.4% (0.1–0.8%)          |
|                                               | Percent (proportion)† |                | 7.9%                     | 76.6%                       | 13.6%                      | 1.8%                     |
| Morocco                                       | Number                |                | 23295 (1061–61028)       | 179510 (40938–391750)       | 43136 (14020–90023)        | 5652 (1968–11415)        |
|                                               | Percent (all-cause)*  |                | 5.1% (0.3–12.2%)         | 5.2% (1.2–10.7%)            | 1.3% (0.4–2.6%)            | 0.3% (0.1–0.6%)          |
|                                               | Percent (proportion)† |                | 9.3%                     | 71.3%                       | 17.1%                      | 2.2%                     |
| Palestine                                     | Number                |                | 4344 (217–11230)         | 23266 (5274–51290)          | 3398 (1096–7086)           | 398 (138–807)            |
|                                               | Percent (all-cause)*  |                | 5.2% (0.3–12.3%)         | 5.7% (1.3–11.5%)            | 1.4% (0.5–3%)              | 0.3% (0.1–0.6%)          |
|                                               | Percent (proportion)† |                | 13.8%                    | 74.1%                       | 10.8%                      | 1.3%                     |
| Oman                                          | Number                |                | 2120 (104–5646)          | 26692 (6508–57191)          | 2595 (841–5370)            | 225 (78–452)             |
|                                               | Percent (all-cause)*  |                | 4.8% (0.3–11.4%)         | 5.4% (1.3–10.8%)            | 1.6% (0.5–3.1%)            | 0.3% (0.1–0.6%)          |
|                                               | Percent (proportion)† |                | 6.7%                     | 84.4%                       | 8.2%                       | 0.7%                     |
| Qatar                                         | Number                |                | 908 (45–2392)            | 17505 (4383–37185)          | 1770 (582–3665)            | 61 (21–124)              |
|                                               | Percent (all-cause)*  |                | 5.8% (0.3–13.7%)         | 5.8% (1.5–11.5%)            | 1.9% (0.6–3.7%)            | 0.3% (0.1–0.7%)          |
|                                               | Percent (proportion)† |                | 4.5%                     | 86.5%                       | 8.7%                       | 0.3%                     |
| Saudi Arabia                                  | Number                |                | 16967 (816–44767)        | 214595 (52065–454355)       | 26370 (8616–53965)         | 1891 (668–3808)          |
|                                               | Percent (all-cause)*  |                | 6.5% (0.3–15.3%)         | 4.1% (1.8–5%)               | 1.3% (0.4–2.7%)            | 0.3% (0.1–0.7%)          |
|                                               | Percent (proportion)† |                | 6.5%                     | 82.6%                       | 10.1%                      | 0.7%                     |
| Syrian Arab Republic                          | Number                |                | 11551 (586–29870)        | 69688 (15543–153290)        | 17994 (5816–37337)         | 2199 (757–4505)          |
|                                               | Percent (all-cause)*  |                | 4.2% (0.2–10%)           | 5.1% (1.2–10.5%)            | 1.4% (0.4–2.8%)            | 0.3% (0.1–0.7%)          |

**Table S27** Age-specific disability related to headache disorders in North Africa and Middle East countries in 2019

|                      |                       | <b>Under 5</b> | <b>5-14 years</b>   | <b>15-49 years</b>     | <b>50-69 years</b>    | <b>70+ years</b>   |
|----------------------|-----------------------|----------------|---------------------|------------------------|-----------------------|--------------------|
|                      |                       | Mean (95% UI)  | Mean (95% UI)       | Mean (95% UI)          | Mean (95% UI)         | Mean (95% UI)      |
| Tunisia              | Percent (proportion)† |                | 11·4%               | 68·7%                  | 17·7%                 | 2·2%               |
|                      | Number                |                | 6365 (301–16819)    | 57502 (13459–123606)   | 16198 (5223–33218)    | 2667 (923–5425)    |
|                      | Percent (all-cause)*  |                | 5·8% (0·3–13·7%)    | 5·8% (1·5–11·7%)       | 1·8% (0·6–3·6%)       | 0·4% (0·1–0·8%)    |
| Türkiye              | Percent (proportion)† |                | 7·7%                | 69·5%                  | 19·6%                 | 3·2%               |
|                      | Number                |                | 39489 (2107–103405) | 418925 (106156–901517) | 110701 (37316–229381) | 19628 (7066–39582) |
|                      | Percent (all-cause)*  |                | 5·7% (0·3–13·4%)    | 6·2% (1·6–12·4%)       | 1·8% (0·6–3·7%)       | 0·4% (0·1–0·8%)    |
| United Arab Emirates | Percent (proportion)† |                | 6·7%                | 71·2%                  | 18·8%                 | 3·3%               |
|                      | Number                |                | 2923 (149–7547)     | 57603 (14777–120565)   | 6891 (2209–14288)     | 163 (57–331)       |
|                      | Percent (all-cause)*  |                | 5·8% (0·3–13·4%)    | 3·9% (1·7–8%)          | 1·3% (0·4–2·6%)       | 0·3% (0·1–0·7%)    |
| Yemen                | Percent (proportion)† |                | 4·3%                | 85·2%                  | 10·2%                 | 0·2%               |
|                      | Number                |                | 29890 (1485–78490)  | 143655 (32468–316821)  | 17094 (5534–35235)    | 2346 (818–4755)    |
|                      | Percent (all-cause)*  |                | 2·9% (0·1–6·9%)     | 3·5% (0·8–7·3%)        | 1·1% (0·4–2·3%)       | 0·3% (0·1–0·6%)    |
| Afghanistan          | Percent (proportion)† |                | 15·5%               | 74·4%                  | 8·9%                  | 1·2%               |
|                      | Number                |                | 36192 (1707–94677)  | 163111 (36129–362471)  | 17119 (5316–35359)    | 2013 (697–4151)    |
|                      | Percent (all-cause)*  |                | 2·8% (0·1–6·9%)     | 3% (0·7–6·3%)          | 0·8% (0·3–1·7%)       | 0·2% (0·1–0·5%)    |
| Sudan                | Percent (proportion)† |                | 16·6%               | 74·7%                  | 7·8%                  | 0·9%               |
|                      | Number                |                | 36592 (1779–96016)  | 194017 (42838–429916)  | 24008 (7634–50010)    | 3337 (1159–6787)   |
|                      | Percent (all-cause)*  |                | 3·8% (0·2–9%)       | 4·7% (1·1–9·9%)        | 1·3% (0·4–2·7%)       | 0·3% (0·1–0·6%)    |
|                      | Percent (proportion)† |                | 14·2%               | 75·2%                  | 9·3%                  | 1·3%               |

DALYs, Disability-Adjusted Life Years; NC, neurological condition; UI, uncertainty interval; Count data are absolute numbers and percentage data are rounded to one decimal place. Percentages and number of DALYs and deaths are not mutually exclusive: the sum of percentages and number of DALYs in the columns exceeds the totals for all causes combined because of overlap between various causes. Measures with insufficient data are not reported here. \*Percent of all-cause indicates the proportion of the specified measure (ie, DALYs) of headache disorders out of all causes in the age-group in the region/nation. †Percent proportion indicates the share of the specified measure (ie, DALYs, deaths, YDLs, or YLLs) of headache disorders in different age-groups in the region/nation. Data in parentheses are 95% uncertainty intervals.

***Table S28 Age-specific disability and death related to motor neuron disease in North Africa and Middle East countries in 2019***  
(NEXT PAGE)



**Table S28** Age-specific disability and death related to motor neuron disease in North Africa and Middle East countries in 2019

|                                               |                       | <b>Under 5</b>      | <b>5-14 years</b>   | <b>15-49 years</b>     | <b>50-69 years</b>     | <b>70+ years</b>       |
|-----------------------------------------------|-----------------------|---------------------|---------------------|------------------------|------------------------|------------------------|
|                                               |                       | Mean (95% UI)       | Mean (95% UI)       | Mean (95% UI)          | Mean (95% UI)          | Mean (95% UI)          |
| <b>DALYs (Disability-Adjusted Life Years)</b> |                       |                     |                     |                        |                        |                        |
| Global                                        | Number                | 54863 (47661–63607) | 16764 (14448–19314) | 179164 (166915–191390) | 508354 (484110–530715) | 275463 (251383–294355) |
|                                               | Percent (all-cause)*  | 0% (0–0%)           | 0% (0–0%)           | 0% (0–0%)              | 0.1% (0.1–0.1%)        | 0.1% (0.1–0.1%)        |
|                                               | Percent (proportion)† | 5.3%                | 1.6%                | 17.3%                  | 49.1%                  | 26.6%                  |
| North Africa and Middle East                  | Number                | 7317 (4724–11194)   | 1583 (1184–2144)    | 11659 (9349–14513)     | 17967 (13755–22567)    | 3102 (2269–4034)       |
|                                               | Percent (all-cause)*  | 0% (0–0%)           | 0% (0–0%)           | 0% (0–0%)              | 0% (0–0.1%)            | 0% (0–0%)              |
|                                               | Percent (proportion)† | 17.6%               | 3.8%                | 28.0%                  | 43.2%                  | 7.5%                   |
| Algeria                                       | Number                | 51 (37–72)          | 58 (47–71)          | 414 (320–536)          | 455 (322–622)          | 45 (30–67)             |
|                                               | Percent (all-cause)*  | 0% (0–0%)           | 0% (0–0%)           | 0% (0–0%)              | 0% (0–0%)              | 0% (0–0%)              |
|                                               | Percent (proportion)† | 4.9%                | 5.7%                | 40.5%                  | 44.5%                  | 4.4%                   |
| Bahrain                                       | Number                | 1 (1–1)             | 1 (1–2)             | 16 (13–21)             | 14 (10–18)             | 1 (0–1)                |
|                                               | Percent (all-cause)*  | 0% (0–0%)           | 0% (0–0%)           | 0% (0–0%)              | 0% (0–0%)              | 0% (0–0%)              |
|                                               | Percent (proportion)† | 2.4%                | 4.1%                | 49.5%                  | 42.1%                  | 1.9%                   |
| Egypt                                         | Number                | 487 (182–1171)      | 178 (124–258)       | 1900 (1119–3089)       | 3622 (1836–6242)       | 296 (158–502)          |
|                                               | Percent (all-cause)*  | 0% (0–0%)           | 0% (0–0%)           | 0% (0–0%)              | 0% (0–0.1%)            | 0% (0–0%)              |
|                                               | Percent (proportion)† | 7.5%                | 2.8%                | 29.3%                  | 55.9%                  | 4.6%                   |
| Iran                                          | Number                | 260 (166–398)       | 107 (84–138)        | 1190 (1011–1414)       | 1937 (1640–2267)       | 338 (262–448)          |
|                                               | Percent (all-cause)*  | 0% (0–0%)           | 0% (0–0%)           | 0% (0–0%)              | 0% (0–0%)              | 0% (0–0%)              |
|                                               | Percent (proportion)† | 6.8%                | 2.8%                | 31.0%                  | 50.5%                  | 8.8%                   |
| Iraq                                          | Number                | 42 (28–61)          | 64 (51–81)          | 296 (220–384)          | 220 (148–303)          | 17 (12–24)             |
|                                               | Percent (all-cause)*  | 0% (0–0%)           | 0% (0–0%)           | 0% (0–0%)              | 0% (0–0%)              | 0% (0–0%)              |
|                                               | Percent (proportion)† | 6.6%                | 10.1%               | 46.3%                  | 34.4%                  | 2.6%                   |
| Jordan                                        | Number                | 102 (56–180)        | 27 (21–34)          | 116 (93–147)           | 87 (65–113)            | 6 (4–8)                |
|                                               | Percent (all-cause)*  | 0% (0–0%)           | 0% (0–0%)           | 0% (0–0%)              | 0% (0–0%)              | 0% (0–0%)              |
|                                               | Percent (proportion)† | 30.1%               | 7.9%                | 34.4%                  | 25.8%                  | 1.8%                   |
| Kuwait                                        | Number                | 42 (26–62)          | 15 (10–20)          | 93 (70–113)            | 49 (36–62)             | 12 (8–15)              |
|                                               | Percent (all-cause)*  | 0.1% (0.0–0.1%)     | 0% (0–0.1%)         | 0% (0–0%)              | 0% (0–0%)              | 0% (0–0%)              |
|                                               | Percent (proportion)† | 20.0%               | 7.1%                | 44.2%                  | 23.2%                  | 5.6%                   |
| Lebanon                                       | Number                | 5 (3–8)             | 7 (5–9)             | 57 (41–81)             | 87 (48–153)            | 13 (7–25)              |
|                                               | Percent (all-cause)*  | 0% (0–0%)           | 0% (0–0%)           | 0% (0–0%)              | 0% (0–0%)              | 0% (0–0%)              |
|                                               | Percent (proportion)† | 3.0%                | 4.0%                | 33.8%                  | 51.4%                  | 7.8%                   |
| Libya                                         | Number                | 5 (3–7)             | 7 (6–9)             | 109 (66–170)           | 114 (59–179)           | 8 (5–13)               |
|                                               | Percent (all-cause)*  | 0% (0–0%)           | 0% (0–0%)           | 0% (0–0%)              | 0% (0–0%)              | 0% (0–0%)              |
|                                               | Percent (proportion)† | 1.9%                | 3.0%                | 44.9%                  | 46.7%                  | 3.4%                   |
| Morocco                                       | Number                | 33 (18–52)          | 40 (31–51)          | 300 (219–421)          | 487 (326–683)          | 43 (28–61)             |
|                                               | Percent (all-cause)*  | 0% (0–0%)           | 0% (0–0%)           | 0% (0–0%)              | 0% (0–0%)              | 0% (0–0%)              |
|                                               | Percent (proportion)† | 3.7%                | 4.5%                | 33.2%                  | 53.9%                  | 4.8%                   |
| Palestine                                     | Number                | 15 (9–25)           | 9 (7–11)            | 34 (27–42)             | 25 (18–34)             | 2 (1–2)                |
|                                               | Percent (all-cause)*  | 0% (0–0%)           | 0% (0–0%)           | 0% (0–0%)              | 0% (0–0%)              | 0% (0–0%)              |
|                                               | Percent (proportion)† | 17.3%               | 10.5%               | 40.6%                  | 29.7%                  | 2.0%                   |
| Oman                                          | Number                | 5 (4–7)             | 5 (4–6)             | 50 (38–65)             | 37 (17–57)             | 3 (1–5)                |
|                                               | Percent (all-cause)*  | 0% (0–0%)           | 0% (0–0%)           | 0% (0–0%)              | 0% (0–0%)              | 0% (0–0%)              |
|                                               | Percent (proportion)† | 4.9%                | 4.9%                | 50.2%                  | 37.2%                  | 2.9%                   |
| Qatar                                         | Number                | 1 (1–2)             | 2 (2–3)             | 31 (24–40)             | 15 (10–21)             | 1 (0–1)                |
|                                               | Percent (all-cause)*  | 0% (0–0%)           | 0% (0–0%)           | 0% (0–0%)              | 0% (0–0%)              | 0% (0–0%)              |
|                                               | Percent (proportion)† | 2.8%                | 4.2%                | 62.2%                  | 29.6%                  | 1.2%                   |
| Saudi Arabia                                  | Number                | 28 (18–45)          | 30 (23–39)          | 530 (372–755)          | 318 (204–486)          | 35 (22–57)             |
|                                               | Percent (all-cause)*  | 0% (0–0%)           | 0% (0–0%)           | 0% (0–0%)              | 0% (0–0%)              | 0% (0–0%)              |
|                                               | Percent (proportion)† | 3.0%                | 3.2%                | 56.3%                  | 33.7%                  | 3.7%                   |
| Syrian Arab Republic                          | Number                | 15 (10–23)          | 25 (21–31)          | 140 (97–208)           | 224 (122–392)          | 19 (11–32)             |
|                                               | Percent (all-cause)*  | 0% (0–0%)           | 0% (0–0%)           | 0% (0–0%)              | 0% (0–0%)              | 0% (0–0%)              |
|                                               | Percent (proportion)† | 3.6%                | 6.0%                | 33.1%                  | 52.9%                  | 4.4%                   |
| Tunisia                                       | Number                | 10 (6–14)           | 14 (11–18)          | 119 (86–159)           | 182 (118–276)          | 21 (13–32)             |

**Table S28** Age-specific disability and death related to motor neuron disease in North Africa and Middle East countries in 2019

|                              |                       | <b>Under 5</b>   | <b>5-14 years</b> | <b>15-49 years</b> | <b>50-69 years</b>  | <b>70+ years</b>    |
|------------------------------|-----------------------|------------------|-------------------|--------------------|---------------------|---------------------|
|                              |                       | Mean (95% UI)    | Mean (95% UI)     | Mean (95% UI)      | Mean (95% UI)       | Mean (95% UI)       |
| Türkiye                      | Percent (all-cause)*  | 0% (0–0%)        | 0% (0–0%)         | 0% (0–0%)          | 0% (0–0%)           | 0% (0–0%)           |
|                              | Percent (proportion)† | 2.7%             | 4.1%              | 34.3%              | 52.7%               | 6.1%                |
|                              | Number                | 6036 (3631–9610) | 783 (476–1279)    | 5205 (3876–6915)   | 9359 (6688–12678)   | 2191 (1435–3131)    |
| United Arab Emirates         | Percent (all-cause)*  | 0.4% (0.2–0.6%)  | 0.1% (0.1–0.2%)   | 0.1% (0.1–0.1%)    | 0.2% (0.1–0.2%)     | 0% (0–0.1%)         |
|                              | Percent (proportion)† | 25.6%            | 3.3%              | 22.1%              | 39.7%               | 9.3%                |
|                              | Number                | 4 (2–5)          | 7 (5–8)           | 350 (169–681)      | 198 (63–420)        | 3 (1–7)             |
| Yemen                        | Percent (all-cause)*  | 0% (0–0%)        | 0% (0–0%)         | 0% (0–0%)          | 0% (0–0.1%)         | 0% (0–0%)           |
|                              | Percent (proportion)† | 0.6%             | 1.2%              | 62.4%              | 35.3%               | 0.6%                |
|                              | Number                | 38 (22–58)       | 53 (40–68)        | 165 (119–225)      | 129 (85–195)        | 11 (7–17)           |
| Afghanistan                  | Percent (all-cause)*  | 0% (0–0%)        | 0% (0–0%)         | 0% (0–0%)          | 0% (0–0%)           | 0% (0–0%)           |
|                              | Percent (proportion)† | 9.5%             | 13.3%             | 41.7%              | 32.5%               | 2.9%                |
|                              | Number                | 70 (43–107)      | 80 (64–101)       | 280 (207–382)      | 184 (113–284)       | 13 (8–23)           |
| Sudan                        | Percent (all-cause)*  | 0% (0–0%)        | 0% (0–0%)         | 0% (0–0%)          | 0% (0–0%)           | 0% (0–0%)           |
|                              | Percent (proportion)† | 11.2%            | 12.8%             | 44.6%              | 29.3%               | 2.1%                |
|                              | Number                | 61 (37–101)      | 68 (52–90)        | 251 (173–340)      | 207 (128–333)       | 20 (12–33)          |
|                              | Percent (all-cause)*  | 0% (0–0%)        | 0% (0–0%)         | 0% (0–0%)          | 0% (0–0%)           | 0% (0–0%)           |
|                              | Percent (proportion)† | 10.1%            | 11.2%             | 41.4%              | 34.1%               | 3.3%                |
|                              |                       |                  |                   |                    |                     |                     |
| <b>Deaths</b>                |                       |                  |                   |                    |                     |                     |
| Global                       | Number                | 611 (528–710)    | 152 (136–171)     | 3221 (3041–3401)   | 17276 (16440–18046) | 17821 (15982–19106) |
|                              | Percent (all-cause)*  | 0% (0–0%)        | 0% (0–0%)         | 0% (0–0%)          | 0.1% (0.1–0.1%)     | 0.1% (0.1–0.1%)     |
|                              | Percent (proportion)† | 1.6%             | 0.4%              | 8.2%               | 44.2%               | 45.6%               |
| North Africa and Middle East | Number                | 83 (53–128)      | 15 (11–22)        | 197 (151–254)      | 590 (450–747)       | 182 (132–235)       |
|                              | Percent (all-cause)*  | 0% (0–0%)        | 0% (0–0%)         | 0% (0–0%)          | 0.1% (0.1–0.1%)     | 0% (0–0%)           |
|                              | Percent (proportion)† | 7.8%             | 1.4%              | 18.5%              | 55.3%               | 17.0%               |
| Algeria                      | Number                | 1 (0–1)          | <0.1 (<0.1–<0.1)  | 6 (4–8)            | 14 (10–20)          | 2 (1–3)             |
|                              | Percent (all-cause)*  | 0% (0–0%)        | 0% (0–0%)         | 0% (0–0%)          | 0% (0–0%)           | 0% (0–0%)           |
|                              | Percent (proportion)† | 2.2%             | 1.8%              | 25.0%              | 61.2%               | 9.7%                |
| Bahrain                      | Number                | <0.1 (<0.1–<0.1) | <0.1 (<0.1–<0.1)  | <0.1 (<0.1–<0.1)   | 0 (0–1)             | <0.1 (<0.1–<0.1)    |
|                              | Percent (all-cause)*  | 0% (0–0%)        | 0% (0–0%)         | 0% (0–0%)          | 0% (0–0%)           | 0% (0–0%)           |
|                              | Percent (proportion)† | 1.2%             | 1.3%              | 30.0%              | 63.1%               | 4.4%                |
| Egypt                        | Number                | 5 (2–13)         | 1 (1–2)           | 34 (17–60)         | 119 (59–205)        | 17 (9–28)           |
|                              | Percent (all-cause)*  | 0% (0–0%)        | 0% (0–0%)         | 0% (0–0.1%)        | 0.1% (0–0.1%)       | 0% (0–0%)           |
|                              | Percent (proportion)† | 3.0%             | 0.8%              | 19.2%              | 67.5%               | 9.5%                |
| Iran                         | Number                | 3 (2–4)          | 1 (1–1)           | 17 (15–20)         | 63 (53–74)          | 19 (15–26)          |
|                              | Percent (all-cause)*  | 0% (0–0%)        | 0% (0–0%)         | 0% (0–0%)          | 0.1% (0.1–0.1%)     | 0% (0–0%)           |
|                              | Percent (proportion)† | 2.8%             | 0.8%              | 16.6%              | 61.1%               | 18.8%               |
| Iraq                         | Number                | 0 (0–1)          | <0.1 (<0.1–<0.1)  | 3 (2–5)            | 6 (4–9)             | 1 (0–1)             |
|                              | Percent (all-cause)*  | 0% (0–0%)        | 0% (0–0%)         | 0% (0–0%)          | 0% (0–0%)           | 0% (0–0%)           |
|                              | Percent (proportion)† | 3.6%             | 3.6%              | 28.0%              | 59.2%               | 5.6%                |
| Jordan                       | Number                | 1 (1–2)          | <0.1 (<0.1–<0.1)  | 1 (1–2)            | 3 (2–3)             | <0.1 (<0.1–<0.1)    |
|                              | Percent (all-cause)*  | 0% (0–0.1%)      | 0% (0–0%)         | 0% (0–0%)          | 0% (0–0%)           | 0% (0–0%)           |
|                              | Percent (proportion)† | 19.9%            | 3.7%              | 26.3%              | 45.5%               | 4.6%                |
| Kuwait                       | Number                | 0 (0–1)          | <0.1 (<0.1–<0.1)  | 1 (1–2)            | 1 (1–2)             | 1 (1–1)             |
|                              | Percent (all-cause)*  | 0.1% (0.1–0.1%)  | 0.1% (0.1–0.2%)   | 0.1% (0–0.1%)      | 0.1% (0–0.1%)       | 0% (0–0%)           |
|                              | Percent (proportion)† | 11.2%            | 3.8%              | 31.5%              | 34.5%               | 18.9%               |
| Lebanon                      | Number                | <0.1 (<0.1–<0.1) | <0.1 (<0.1–<0.1)  | 1 (0–1)            | 3 (1–5)             | 1 (0–1)             |
|                              | Percent (all-cause)*  | 0% (0–0%)        | 0% (0–0%)         | 0% (0–0%)          | 0% (0–0.1%)         | 0% (0–0%)           |
|                              | Percent (proportion)† | 1.1%             | 0.9%              | 18.2%              | 64.3%               | 15.6%               |
| Libya                        | Number                | <0.1 (<0.1–<0.1) | <0.1 (<0.1–<0.1)  | 2 (1–3)            | 4 (2–6)             | 0 (0–1)             |
|                              | Percent (all-cause)*  | 0% (0–0%)        | 0% (0–0%)         | 0% (0–0%)          | 0% (0–0.1%)         | 0% (0–0%)           |
|                              | Percent (proportion)† | 0.8%             | 0.8%              | 31.1%              | 60.1%               | 7.2%                |
| Morocco                      | Number                | 0 (0–1)          | <0.1 (<0.1–<0.1)  | 4 (2–6)            | 15 (10–22)          | 2 (1–3)             |
|                              | Percent (all-cause)*  | 0% (0–0%)        | 0% (0–0%)         | 0% (0–0%)          | 0% (0–0%)           | 0% (0–0%)           |

**Table S28** Age-specific disability and death related to motor neuron disease in North Africa and Middle East countries in 2019

|                                           |                       | <b>Under 5</b>   | <b>5-14 years</b> | <b>15-49 years</b>  | <b>50-69 years</b>  | <b>70+ years</b>   |
|-------------------------------------------|-----------------------|------------------|-------------------|---------------------|---------------------|--------------------|
|                                           |                       | Mean (95% UI)    | Mean (95% UI)     | Mean (95% UI)       | Mean (95% UI)       | Mean (95% UI)      |
| Palestine                                 | Percent (proportion)† | 1·5%             | 1·1%              | 17·8%               | 70·1%               | 9·6%               |
|                                           | Number                | <0·1 (<0·1–<0·1) | <0·1 (<0·1–<0·1)  | <0·1 (<0·1–<0·1)    | 1 (1–1)             | <0·1 (<0·1–<0·1)   |
|                                           | Percent (all-cause)*  | 0% (0–0%)        | 0% (0–0%)         | 0% (0–0%)           | 0% (0–0%)           | 0% (0–0%)          |
| Oman                                      | Percent (proportion)† | 11·3%            | 4·1%              | 25·1%               | 54·7%               | 4·8%               |
|                                           | Number                | <0·1 (<0·1–<0·1) | <0·1 (<0·1–<0·1)  | 1 (0–1)             | 1 (1–2)             | <0·1 (<0·1–<0·1)   |
|                                           | Percent (all-cause)*  | 0% (0–0%)        | 0% (0–0%)         | 0% (0–0%)           | 0% (0–0·1%)         | 0% (0–0%)          |
| Qatar                                     | Percent (proportion)† | 2·4%             | 1·7%              | 30·8%               | 57·7%               | 7·5%               |
|                                           | Number                | <0·1 (<0·1–<0·1) | <0·1 (<0·1–<0·1)  | <0·1 (<0·1–<0·1)    | 0 (0–1)             | <0·1 (<0·1–<0·1)   |
|                                           | Percent (all-cause)*  | 0% (0–0%)        | 0% (0–0%)         | 0% (0–0%)           | 0% (0–0%)           | 0% (0–0%)          |
| Saudi Arabia                              | Percent (proportion)† | 1·6%             | 1·6%              | 38·7%               | 54·2%               | 3·8%               |
|                                           | Number                | <0·1 (<0·1–<0·1) | <0·1 (<0·1–<0·1)  | 8 (5–13)            | 10 (6–15)           | 2 (1–3)            |
|                                           | Percent (all-cause)*  | 0% (0–0%)        | 0% (0–0%)         | 0% (0–0%)           | 0% (0–0%)           | 0% (0–0%)          |
| Syrian Arab Republic                      | Percent (proportion)† | 1·4%             | 0·8%              | 39·6%               | 48·3%               | 9·9%               |
|                                           | Number                | <0·1 (<0·1–<0·1) | <0·1 (<0·1–<0·1)  | 2 (1–3)             | 7 (4–13)            | 1 (0–2)            |
|                                           | Percent (all-cause)*  | 0% (0–0%)        | 0% (0–0%)         | 0% (0–0%)           | 0% (0–0%)           | 0% (0–0%)          |
| Tunisia                                   | Percent (proportion)† | 1·5%             | 1·7%              | 18·8%               | 68·9%               | 9·0%               |
|                                           | Number                | <0·1 (<0·1–<0·1) | <0·1 (<0·1–<0·1)  | 2 (1–2)             | 6 (4–9)             | 1 (1–2)            |
|                                           | Percent (all-cause)*  | 0% (0–0%)        | 0% (0–0%)         | 0% (0–0%)           | 0% (0–0%)           | 0% (0–0%)          |
| Türkiye                                   | Percent (proportion)† | 1·1%             | 1·1%              | 18·5%               | 67·4%               | 11·9%              |
|                                           | Number                | 69 (41–110)      | 9 (5–15)          | 99 (72–134)         | 314 (224–428)       | 132 (88–185)       |
|                                           | Percent (all-cause)*  | 0·5% (0·3–0·7%)  | 0·4% (0·2–0·6%)   | 0·3% (0·2–0·3%)     | 0·3% (0·2–0·3%)     | 0% (0–0·1%)        |
| United Arab Emirates                      | Percent (proportion)† | 11·1%            | 1·5%              | 15·9%               | 50·3%               | 21·1%              |
|                                           | Number                | <0·1 (<0·1–<0·1) | <0·1 (<0·1–<0·1)  | 6 (3–14)            | 6 (2–13)            | <0·1 (<0·1–<0·1)   |
|                                           | Percent (all-cause)*  | 0% (0–0%)        | 0% (0–0%)         | 0% (0–0·1%)         | 0·1% (0–0·1%)       | 0% (0–0%)          |
| Yemen                                     | Percent (proportion)† | 0·3%             | 0·3%              | 50·8%               | 47·4%               | 1·3%               |
|                                           | Number                | 0 (0–1)          | 0 (0–1)           | 2 (1–3)             | 4 (3–6)             | 1 (0–1)            |
|                                           | Percent (all-cause)*  | 0% (0–0%)        | 0% (0–0%)         | 0% (0–0%)           | 0% (0–0%)           | 0% (0–0%)          |
| Afghanistan                               | Percent (proportion)† | 5·3%             | 5·7%              | 27·4%               | 54·4%               | 7·3%               |
|                                           | Number                | 1 (0–1)          | 1 (1–1)           | 4 (2–6)             | 5 (3–9)             | 1 (0–1)            |
|                                           | Percent (all-cause)*  | 0% (0–0%)        | 0% (0–0%)         | 0% (0–0%)           | 0% (0–0%)           | 0% (0–0%)          |
| Sudan                                     | Percent (proportion)† | 6·3%             | 5·7%              | 34·2%               | 48·2%               | 5·6%               |
|                                           | Number                | 1 (0–1)          | 1 (0–1)           | 3 (2–5)             | 6 (4–10)            | 1 (1–2)            |
|                                           | Percent (all-cause)*  | 0% (0–0%)        | 0% (0–0%)         | 0% (0–0%)           | 0% (0–0%)           | 0% (0–0%)          |
|                                           | Percent (proportion)† | 5·5%             | 4·7%              | 27·1%               | 54·5%               | 8·3%               |
| <b>YLDs (Years Lived with Disability)</b> |                       |                  |                   |                     |                     |                    |
| Global                                    | Number                | 1310 (786–2004)  | 4763 (3017–6915)  | 23366 (15910–32888) | 15905 (10538–22039) | 11724 (7909–16184) |
|                                           | Percent (all-cause)*  | 0% (0–0%)        | 0% (0–0%)         | 0% (0–0%)           | 0% (0–0%)           | 0% (0–0%)          |
|                                           | Percent (proportion)† | 2·3%             | 8·3%              | 40·9%               | 27·9%               | 20·5%              |
| North Africa and Middle East              | Number                | 89 (51–142)      | 376 (238–553)     | 2165 (1453–3090)    | 535 (330–811)       | 144 (89–213)       |
|                                           | Percent (all-cause)*  | 0% (0–0%)        | 0% (0–0%)         | 0% (0–0%)           | 0% (0–0%)           | 0% (0–0%)          |
|                                           | Percent (proportion)† | 2·7%             | 11·4%             | 65·4%               | 16·2%               | 4·3%               |
| Algeria                                   | Number                | 7 (4–11)         | 25 (15–37)        | 137 (91–199)        | 34 (20–53)          | 9 (5–14)           |
|                                           | Percent (all-cause)*  | 0% (0–0%)        | 0% (0–0%)         | 0% (0–0%)           | 0% (0–0%)           | 0% (0–0%)          |
|                                           | Percent (proportion)† | 3·2%             | 11·8%             | 64·8%               | 15·8%               | 4·3%               |
| Bahrain                                   | Number                | <0·1 (<0·1–<0·1) | 1 (0–1)           | 7 (5–10)            | 2 (1–3)             | <0·1 (<0·1–<0·1)   |
|                                           | Percent (all-cause)*  | 0% (0–0%)        | 0% (0–0%)         | 0% (0–0%)           | 0% (0–0%)           | 0% (0–0%)          |
|                                           | Percent (proportion)† | 1·5%             | 6·9%              | 73·2%               | 17·0%               | 1·4%               |
| Egypt                                     | Number                | 15 (9–25)        | 67 (42–98)        | 300 (199–431)       | 58 (35–91)          | 13 (7–20)          |
|                                           | Percent (all-cause)*  | 0% (0–0%)        | 0% (0–0%)         | 0% (0–0%)           | 0% (0–0%)           | 0% (0–0%)          |
|                                           | Percent (proportion)† | 3·4%             | 14·8%             | 66·1%               | 12·9%               | 2·8%               |
| Iran                                      | Number                | 11 (6–18)        | 44 (27–65)        | 367 (242–538)       | 94 (58–144)         | 25 (15–38)         |
|                                           | Percent (all-cause)*  | 0% (0–0%)        | 0% (0–0%)         | 0% (0–0%)           | 0% (0–0%)           | 0% (0–0%)          |
|                                           | Percent (proportion)† | 1·9%             | 8·1%              | 67·9%               | 17·4%               | 4·6%               |

**Table S28** Age-specific disability and death related to motor neuron disease in North Africa and Middle East countries in 2019

|                      |                       | <b>Under 5</b>   | <b>5-14 years</b> | <b>15-49 years</b> | <b>50-69 years</b> | <b>70+ years</b> |
|----------------------|-----------------------|------------------|-------------------|--------------------|--------------------|------------------|
|                      |                       | Mean (95% UI)    | Mean (95% UI)     | Mean (95% UI)      | Mean (95% UI)      | Mean (95% UI)    |
| Iraq                 | Number                | 8 (5-13)         | 33 (21-48)        | 146 (98-207)       | 25 (14-39)         | 6 (4-10)         |
|                      | Percent (all-cause)*  | 0% (0-0%)        | 0% (0-0%)         | 0% (0-0%)          | 0% (0-0%)          | 0% (0-0%)        |
|                      | Percent (proportion)† | 3.8%             | 15.1%             | 66.9%              | 11.3%              | 2.9%             |
| Jordan               | Number                | 2 (1-4)          | 10 (6-15)         | 44 (29-62)         | 8 (5-12)           | 2 (1-3)          |
|                      | Percent (all-cause)*  | 0% (0-0%)        | 0% (0-0%)         | 0% (0-0%)          | 0% (0-0%)          | 0% (0-0%)        |
|                      | Percent (proportion)† | 3.8%             | 15.3%             | 66.7%              | 11.8%              | 2.5%             |
| Kuwait               | Number                | 1 (0-1)          | 3 (2-4)           | 24 (16-34)         | 4 (2-7)            | 1 (0-1)          |
|                      | Percent (all-cause)*  | 0% (0-0%)        | 0% (0-0%)         | 0% (0-0%)          | 0% (0-0%)          | 0% (0-0%)        |
|                      | Percent (proportion)† | 2.2%             | 8.0%              | 74.4%              | 13.0%              | 2.5%             |
| Lebanon              | Number                | 1 (1-2)          | 4 (2-5)           | 20 (13-28)         | 5 (3-8)            | 2 (1-3)          |
|                      | Percent (all-cause)*  | 0% (0-0%)        | 0% (0-0%)         | 0% (0-0%)          | 0% (0-0%)          | 0% (0-0%)        |
|                      | Percent (proportion)† | 3.5%             | 12.0%             | 62.3%              | 15.6%              | 6.7%             |
| Libya                | Number                | 1 (0-1)          | 4 (2-5)           | 24 (16-35)         | 5 (3-8)            | 1 (1-2)          |
|                      | Percent (all-cause)*  | 0% (0-0%)        | 0% (0-0%)         | 0% (0-0%)          | 0% (0-0%)          | 0% (0-0%)        |
|                      | Percent (proportion)† | 2.0%             | 10.4%             | 69.4%              | 14.5%              | 3.7%             |
| Morocco              | Number                | 5 (3-8)          | 21 (13-31)        | 117 (79-168)       | 32 (19-50)         | 8 (5-12)         |
|                      | Percent (all-cause)*  | 0% (0-0%)        | 0% (0-0%)         | 0% (0-0%)          | 0% (0-0%)          | 0% (0-0%)        |
|                      | Percent (proportion)† | 2.6%             | 11.6%             | 63.9%              | 17.4%              | 4.4%             |
| Palestine            | Number                | 1 (1-2)          | 4 (3-6)           | 17 (11-23)         | 3 (2-4)            | 1 (0-1)          |
|                      | Percent (all-cause)*  | 0% (0-0%)        | 0% (0-0%)         | 0% (0-0%)          | 0% (0-0%)          | 0% (0-0%)        |
|                      | Percent (proportion)† | 4.4%             | 17.6%             | 65.2%              | 10.6%              | 2.2%             |
| Oman                 | Number                | 1 (0-1)          | 2 (1-3)           | 20 (13-28)         | 2 (1-3)            | <0.1 (<0.1-<0.1) |
|                      | Percent (all-cause)*  | 0% (0-0%)        | 0% (0-0%)         | 0% (0-0%)          | 0% (0-0%)          | 0% (0-0%)        |
|                      | Percent (proportion)† | 2.8%             | 8.9%              | 79.5%              | 7.7%               | 1.1%             |
| Qatar                | Number                | <0.1 (<0.1-<0.1) | 1 (1-2)           | 16 (11-23)         | 2 (1-3)            | <0.1 (<0.1-<0.1) |
|                      | Percent (all-cause)*  | 0% (0-0%)        | 0% (0-0%)         | 0% (0-0%)          | 0% (0-0%)          | 0% (0-0%)        |
|                      | Percent (proportion)† | 1.5%             | 5.5%              | 82.9%              | 9.7%               | 0.5%             |
| Saudi Arabia         | Number                | 4 (2-7)          | 17 (11-25)        | 151 (101-216)      | 21 (13-34)         | 3 (2-5)          |
|                      | Percent (all-cause)*  | 0% (0-0%)        | 0% (0-0%)         | 0% (0-0%)          | 0% (0-0%)          | 0% (0-0%)        |
|                      | Percent (proportion)† | 2.1%             | 8.8%              | 76.7%              | 10.8%              | 1.5%             |
| Syrian Arab Republic | Number                | 2 (1-4)          | 11 (7-17)         | 48 (32-69)         | 14 (8-21)          | 3 (2-5)          |
|                      | Percent (all-cause)*  | 0% (0-0%)        | 0% (0-0%)         | 0% (0-0%)          | 0% (0-0%)          | 0% (0-0%)        |
|                      | Percent (proportion)† | 2.8%             | 14.3%             | 61.4%              | 17.5%              | 4.0%             |
| Tunisia              | Number                | 2 (1-3)          | 7 (4-10)          | 44 (29-63)         | 14 (9-22)          | 4 (2-7)          |
|                      | Percent (all-cause)*  | 0% (0-0%)        | 0% (0-0%)         | 0% (0-0%)          | 0% (0-0%)          | 0% (0-0%)        |
|                      | Percent (proportion)† | 2.3%             | 9.7%              | 61.7%              | 20.2%              | 6.0%             |
| Türkiye              | Number                | 10 (6-15)        | 46 (30-67)        | 385 (259-545)      | 175 (111-252)      | 56 (36-82)       |
|                      | Percent (all-cause)*  | 0% (0-0%)        | 0% (0-0%)         | 0% (0-0%)          | 0% (0-0%)          | 0% (0-0%)        |
|                      | Percent (proportion)† | 1.5%             | 6.9%              | 57.2%              | 26.0%              | 8.4%             |
| United Arab Emirates | Number                | 1 (0-1)          | 3 (2-5)           | 52 (35-76)         | 6 (4-10)           | <0.1 (<0.1-<0.1) |
|                      | Percent (all-cause)*  | 0% (0-0%)        | 0% (0-0%)         | 0% (0-0%)          | 0% (0-0%)          | 0% (0-0%)        |
|                      | Percent (proportion)† | 1.2%             | 5.4%              | 82.8%              | 10.2%              | 0.3%             |
| Yemen                | Number                | 4 (2-7)          | 20 (12-30)        | 65 (44-95)         | 8 (5-13)           | 2 (1-4)          |
|                      | Percent (all-cause)*  | 0% (0-0%)        | 0% (0-0%)         | 0% (0-0%)          | 0% (0-0%)          | 0% (0-0%)        |
|                      | Percent (proportion)† | 4.2%             | 19.7%             | 65.4%              | 8.5%               | 2.2%             |
| Afghanistan          | Number                | 7 (4-12)         | 29 (18-44)        | 90 (60-129)        | 10 (6-16)          | 3 (1-4)          |
|                      | Percent (all-cause)*  | 0% (0-0%)        | 0% (0-0%)         | 0% (0-0%)          | 0% (0-0%)          | 0% (0-0%)        |
|                      | Percent (proportion)† | 5.2%             | 20.8%             | 65.0%              | 7.1%               | 1.8%             |
| Sudan                | Number                | 5 (3-9)          | 24 (14-35)        | 90 (60-129)        | 13 (8-20)          | 4 (2-6)          |
|                      | Percent (all-cause)*  | 0% (0-0%)        | 0% (0-0%)         | 0% (0-0%)          | 0% (0-0%)          | 0% (0-0%)        |
|                      | Percent (proportion)† | 3.8%             | 17.6%             | 66.3%              | 9.6%               | 2.7%             |

**YLLs (Years of Life Lost)**

**Table S28** Age-specific disability and death related to motor neuron disease in North Africa and Middle East countries in 2019

|                              |                       | <b>Under 5</b>      | <b>5-14 years</b>   | <b>15-49 years</b>     | <b>50-69 years</b>     | <b>70+ years</b>       |
|------------------------------|-----------------------|---------------------|---------------------|------------------------|------------------------|------------------------|
|                              |                       | Mean (95% UI)       | Mean (95% UI)       | Mean (95% UI)          | Mean (95% UI)          | Mean (95% UI)          |
| Global                       | Number                | 53552 (46299–62155) | 12001 (10695–13476) | 155798 (146851–164731) | 492448 (469063–514672) | 263739 (239740–281776) |
|                              | Percent (all-cause)*  | 0% (0–0%)           | 0% (0–0%)           | 0% (0–0%)              | 0.1% (0.1–0.1%)        | 0.1% (0.1–0.1%)        |
|                              | Percent (proportion)† | 5.5%                | 1.2%                | 15.9%                  | 50.4%                  | 27.0%                  |
| North Africa and Middle East | Number                | 7229 (4654–11108)   | 1207 (841–1722)     | 9495 (7281–12097)      | 17432 (13261–22119)    | 2958 (2125–3900)       |
|                              | Percent (all-cause)*  | 0% (0–0%)           | 0% (0–0%)           | 0% (0–0%)              | 0.1% (0.1–0.1%)        | 0% (0–0%)              |
|                              | Percent (proportion)† | 18.9%               | 3.1%                | 24.8%                  | 45.5%                  | 7.7%                   |
| Algeria                      | Number                | 44 (31–66)          | 33 (28–39)          | 277 (192–390)          | 422 (291–590)          | 36 (22–57)             |
|                              | Percent (all-cause)*  | 0% (0–0%)           | 0% (0–0%)           | 0% (0–0%)              | 0% (0–0%)              | 0% (0–0%)              |
|                              | Percent (proportion)† | 5.4%                | 4.1%                | 34.1%                  | 52.0%                  | 4.4%                   |
| Bahrain                      | Number                | 1 (0–1)             | 1 (1–1)             | 9 (6–12)               | 12 (9–16)              | 0 (0–1)                |
|                              | Percent (all-cause)*  | 0% (0–0%)           | 0% (0–0%)           | 0% (0–0%)              | 0% (0–0%)              | 0% (0–0%)              |
|                              | Percent (proportion)† | 2.8%                | 2.9%                | 39.5%                  | 52.7%                  | 2.1%                   |
| Egypt                        | Number                | 471 (166–1153)      | 111 (66–187)        | 1600 (847–2791)        | 3563 (1776–6194)       | 283 (145–488)          |
|                              | Percent (all-cause)*  | 0% (0–0%)           | 0% (0–0%)           | 0% (0–0.1%)            | 0.1% (0.0–0.1%)        | 0% (0–0%)              |
|                              | Percent (proportion)† | 7.8%                | 1.8%                | 26.5%                  | 59.1%                  | 4.7%                   |
| Iran                         | Number                | 250 (154–386)       | 63 (50–86)          | 823 (705–969)          | 1843 (1553–2176)       | 313 (236–423)          |
|                              | Percent (all-cause)*  | 0% (0–0%)           | 0% (0–0%)           | 0% (0–0%)              | 0.1% (0.1–0.1%)        | 0% (0–0%)              |
|                              | Percent (proportion)† | 7.6%                | 1.9%                | 25.0%                  | 56.0%                  | 9.5%                   |
| Iraq                         | Number                | 34 (21–52)          | 32 (26–38)          | 151 (99–226)           | 196 (126–278)          | 11 (6–17)              |
|                              | Percent (all-cause)*  | 0% (0–0%)           | 0% (0–0%)           | 0% (0–0%)              | 0% (0–0%)              | 0% (0–0%)              |
|                              | Percent (proportion)† | 8.0%                | 7.5%                | 35.7%                  | 46.3%                  | 2.5%                   |
| Jordan                       | Number                | 99 (53–178)         | 17 (13–22)          | 73 (56–96)             | 80 (58–105)            | 4 (3–6)                |
|                              | Percent (all-cause)*  | 0% (0–0.1%)         | 0% (0–0%)           | 0% (0–0%)              | 0% (0–0%)              | 0% (0–0%)              |
|                              | Percent (proportion)† | 36.4%               | 6.1%                | 26.7%                  | 29.1%                  | 1.6%                   |
| Kuwait                       | Number                | 41 (26–62)          | 12 (8–18)           | 69 (49–87)             | 45 (32–58)             | 11 (7–14)              |
|                              | Percent (all-cause)*  | 0.1% (0.1–0.1%)     | 0.1% (0.1–0.2%)     | 0.1% (0.0–0.1%)        | 0.1% (0.0–0.1%)        | 0% (0–0%)              |
|                              | Percent (proportion)† | 23.2%               | 6.9%                | 38.7%                  | 25.1%                  | 6.1%                   |
| Lebanon                      | Number                | 4 (2–7)             | 3 (2–4)             | 38 (23–59)             | 82 (43–149)            | 11 (5–23)              |
|                              | Percent (all-cause)*  | 0% (0–0%)           | 0% (0–0%)           | 0% (0–0%)              | 0% (0.0–0.1%)          | 0% (0–0%)              |
|                              | Percent (proportion)† | 2.9%                | 2.2%                | 27.3%                  | 59.5%                  | 8.1%                   |
| Libya                        | Number                | 4 (3–6)             | 4 (3–5)             | 85 (43–146)            | 109 (54–174)           | 7 (4–11)               |
|                              | Percent (all-cause)*  | 0% (0–0%)           | 0% (0–0%)           | 0% (0–0%)              | 0% (0.0–0.1%)          | 0% (0–0%)              |
|                              | Percent (proportion)† | 1.9%                | 1.8%                | 40.8%                  | 52.1%                  | 3.4%                   |
| Morocco                      | Number                | 28 (13–48)          | 19 (14–24)          | 182 (120–288)          | 455 (292–649)          | 35 (21–54)             |
|                              | Percent (all-cause)*  | 0% (0–0%)           | 0% (0–0%)           | 0% (0–0%)              | 0% (0–0%)              | 0% (0–0%)              |
|                              | Percent (proportion)† | 3.9%                | 2.7%                | 25.4%                  | 63.2%                  | 4.9%                   |
| Palestine                    | Number                | 13 (8–24)           | 4 (4–5)             | 18 (14–22)             | 22 (15–30)             | 1 (1–2)                |
|                              | Percent (all-cause)*  | 0% (0–0%)           | 0% (0–0%)           | 0% (0–0%)              | 0% (0–0%)              | 0% (0–0%)              |
|                              | Percent (proportion)† | 22.8%               | 7.4%                | 29.9%                  | 37.9%                  | 1.9%                   |
| Oman                         | Number                | 4 (3–6)             | 3 (2–3)             | 31 (20–44)             | 35 (15–55)             | 3 (1–5)                |
|                              | Percent (all-cause)*  | 0% (0–0%)           | 0% (0–0%)           | 0% (0–0%)              | 0% (0.0–0.1%)          | 0% (0–0%)              |
|                              | Percent (proportion)† | 5.6%                | 3.6%                | 40.7%                  | 46.7%                  | 3.4%                   |
| Qatar                        | Number                | 1 (1–2)             | 1 (1–1)             | 15 (10–21)             | 13 (8–19)              | 1 (0–1)                |
|                              | Percent (all-cause)*  | 0% (0–0%)           | 0% (0–0%)           | 0% (0–0%)              | 0% (0–0%)              | 0% (0–0%)              |
|                              | Percent (proportion)† | 3.6%                | 3.3%                | 48.6%                  | 42.7%                  | 1.8%                   |
| Saudi Arabia                 | Number                | 24 (15–41)          | 13 (10–16)          | 379 (233–604)          | 296 (185–466)          | 32 (19–54)             |
|                              | Percent (all-cause)*  | 0% (0–0%)           | 0% (0–0%)           | 0% (0–0%)              | 0% (0–0%)              | 0% (0–0%)              |
|                              | Percent (proportion)† | 3.3%                | 1.7%                | 50.9%                  | 39.8%                  | 4.3%                   |
| Syrian Arab Republic         | Number                | 13 (9–20)           | 14 (12–16)          | 92 (55–153)            | 210 (108–376)          | 16 (8–28)              |
|                              | Percent (all-cause)*  | 0% (0–0%)           | 0% (0–0%)           | 0% (0–0%)              | 0% (0–0%)              | 0% (0–0%)              |
|                              | Percent (proportion)† | 3.8%                | 4.1%                | 26.7%                  | 60.9%                  | 4.5%                   |
| Tunisia                      | Number                | 8 (5–12)            | 7 (6–9)             | 75 (47–113)            | 168 (104–260)          | 17 (10–28)             |

**Table S28** Age-specific disability and death related to motor neuron disease in North Africa and Middle East countries in 2019

|                      |                       | <b>Under 5</b>   | <b>5-14 years</b> | <b>15-49 years</b> | <b>50-69 years</b> | <b>70+ years</b> |
|----------------------|-----------------------|------------------|-------------------|--------------------|--------------------|------------------|
|                      |                       | Mean (95% UI)    | Mean (95% UI)     | Mean (95% UI)      | Mean (95% UI)      | Mean (95% UI)    |
| Türkiye              | Percent (all-cause)*  | 0% (0-0%)        | 0% (0-0%)         | 0% (0-0%)          | 0% (0-0%)          | 0% (0-0%)        |
|                      | Percent (proportion)† | 2.9%             | 2.7%              | 27.2%              | 61.1%              | 6.1%             |
|                      | Number                | 6026 (3621-9601) | 736 (429-1226)    | 4820 (3489-6503)   | 9184 (6510-12535)  | 2135 (1382-3095) |
|                      | Percent (all-cause)*  | 0.5% (0.3-0.7%)  | 0.4% (0.2-0.6%)   | 0.3% (0.2-0.3%)    | 0.3% (0.2-0.3%)    | 0.1% (0-0.1%)    |
| United Arab Emirates | Percent (proportion)† | 26.3%            | 3.2%              | 21.0%              | 40.1%              | 9.3%             |
|                      | Number                | 3 (2-4)          | 3 (3-4)           | 297 (120-630)      | 191 (56-414)       | 3 (1-7)          |
|                      | Percent (all-cause)*  | 0% (0-0%)        | 0% (0-0%)         | 0% (0-0.1%)        | 0.1% (0-0.1%)      | 0% (0-0%)        |
| Yemen                | Percent (proportion)† | 0.6%             | 0.6%              | 59.8%              | 38.5%              | 0.6%             |
|                      | Number                | 34 (19-54)       | 33 (24-45)        | 100 (61-154)       | 120 (78-186)       | 9 (5-15)         |
|                      | Percent (all-cause)*  | 0% (0-0%)        | 0% (0-0%)         | 0% (0-0%)          | 0% (0-0%)          | 0% (0-0%)        |
| Afghanistan          | Percent (proportion)† | 11.4%            | 11.2%             | 33.7%              | 40.6%              | 3.1%             |
|                      | Number                | 63 (36-100)      | 52 (41-68)        | 190 (126-286)      | 174 (105-275)      | 11 (6-20)        |
|                      | Percent (all-cause)*  | 0% (0-0%)        | 0% (0-0%)         | 0% (0-0%)          | 0% (0-0%)          | 0% (0-0%)        |
| Sudan                | Percent (proportion)† | 12.8%            | 10.5%             | 38.8%              | 35.6%              | 2.2%             |
|                      | Number                | 56 (32-96)       | 44 (33-64)        | 162 (96-248)       | 194 (115-317)      | 17 (9-30)        |
|                      | Percent (all-cause)*  | 0% (0-0%)        | 0% (0-0%)         | 0% (0-0%)          | 0% (0-0%)          | 0% (0-0%)        |
|                      | Percent (proportion)† | 11.9%            | 9.3%              | 34.2%              | 41.1%              | 3.5%             |

DALYs, Disability-Adjusted Life Years; NC, neurological condition; UI, uncertainty interval; YLDs, Years Lived with Disability; YLLs, Years of Life Lost. Count data are absolute numbers and percentage data are rounded to one decimal place. Percentages and number of DALYs, YLDs, YLLs, deaths, incident cases, and prevalent cases are not mutually exclusive: the sum of percentages and number of DALYs, deaths, YLDs, and YLLs in the columns exceeds the totals for all causes combined because of overlap between various causes. Measures with insufficient data are not reported here. \*Percent of all-cause indicates the proportion of the specified measure (ie, DALYs, deaths, YDLs, or YLLs) of motor neuron diseases out of all causes in the age-group in the region/nation. † Percent proportion indicates the share of the specified measure (ie, DALYs, deaths, YDLs, or YLLs) of motor neuron diseases in different age-groups in the region/nation. Data in parentheses are 95% uncertainty intervals.

***Table S29 Age-specific disability and death related to other rare neurological conditions in North Africa and Middle East countries in 2019***  
(NEXT PAGE)



**Table S29** Age-specific disability and death related to other neurological disorders in North Africa and Middle East countries in 2019

|                                               |                       | <b>Under 5</b>         | <b>5-14 years</b>       | <b>15-49 years</b>        | <b>50-69 years</b>     | <b>70+ years</b>       |
|-----------------------------------------------|-----------------------|------------------------|-------------------------|---------------------------|------------------------|------------------------|
|                                               |                       | Mean (95% UI)          | Mean (95% UI)           | Mean (95% UI)             | Mean (95% UI)          | Mean (95% UI)          |
| <b>DALYs (Disability-Adjusted Life Years)</b> |                       |                        |                         |                           |                        |                        |
| Global                                        | Number                | 573475 (438275–731685) | 817759 (556212–1186886) | 1633664 (1288030–2051379) | 833344 (729013–951499) | 405148 (363856–448501) |
|                                               | Percent (all-cause)*  | 0.1% (0.1–0.2%)        | 0.7% (0.5–1%)           | 0.2% (0.2–0.3%)           | 0.1% (0.1–0.1%)        | 0.1% (0.1–0.1%)        |
|                                               | Percent (proportion)† | 13.5%                  | 19.2%                   | 38.3%                     | 19.5%                  | 9.5%                   |
| North Africa and Middle East                  | Number                | 57524 (42235–75626)    | 71076 (45915–109443)    | 135329 (104551–174882)    | 46157 (38568–54481)    | 14605 (12696–16876)    |
|                                               | Percent (all-cause)*  | 0.2% (0.2–0.3%)        | 0.8% (0.5–1.1%)         | 0.2% (0.2–0.3%)           | 0.1% (0.1–0.1%)        | 0.1% (0.1–0.1%)        |
|                                               | Percent (proportion)† | 17.7%                  | 21.9%                   | 41.7%                     | 14.2%                  | 4.5%                   |
| Algeria                                       | Number                | 3332 (1722–5632)       | 4275 (1524–8915)        | 7835 (4650–11817)         | 2735 (2080–3600)       | 867 (689–1062)         |
|                                               | Percent (all-cause)*  | 0.2% (0.1–0.3%)        | 0.8% (0.3–1.7%)         | 0.2% (0.1–0.3%)           | 0.1% (0.1–0.1%)        | 0.1% (0–0.1%)          |
|                                               | Percent (proportion)† | 17.5%                  | 22.4%                   | 41.1%                     | 14.4%                  | 4.6%                   |
| Bahrain                                       | Number                | 94 (60–139)            | 124 (54–244)            | 372 (225–591)             | 145 (105–197)          | 23 (19–28)             |
|                                               | Percent (all-cause)*  | 1% (0.6–1.4%)          | 1.3% (0.6–2.3%)         | 0.3% (0.2–0.4%)           | 0.2% (0.1–0.2%)        | 0.1% (0.1–0.1%)        |
|                                               | Percent (proportion)† | 12.4%                  | 16.4%                   | 49.0%                     | 19.1%                  | 3.1%                   |
| Egypt                                         | Number                | 9586 (4694–16147)      | 11945 (4558–22891)      | 17408 (10355–26783)       | 8514 (5807–11474)      | 1856 (1346–2460)       |
|                                               | Percent (all-cause)*  | 0.3% (0.2–0.5%)        | 0.7% (0.3–1.3%)         | 0.2% (0.1–0.3%)           | 0.1% (0.1–0.1%)        | 0% (0–0.1%)            |
|                                               | Percent (proportion)† | 19.4%                  | 24.2%                   | 35.3%                     | 17.3%                  | 3.8%                   |
| Iran                                          | Number                | 5115 (3405–7354)       | 8464 (5200–13031)       | 17915 (14089–22762)       | 6923 (5895–8127)       | 2283 (1959–2626)       |
|                                               | Percent (all-cause)*  | 0.3% (0.2–0.5%)        | 0.9% (0.6–1.3%)         | 0.2% (0.2–0.3%)           | 0.1% (0.1–0.1%)        | 0.1% (0.1–0.1%)        |
|                                               | Percent (proportion)† | 12.6%                  | 20.8%                   | 44.0%                     | 17.0%                  | 5.6%                   |
| Iraq                                          | Number                | 5037 (2880–7769)       | 6802 (3375–11808)       | 9796 (6047–15455)         | 1864 (1373–2456)       | 479 (384–590)          |
|                                               | Percent (all-cause)*  | 0.3% (0.2–0.5%)        | 0.9% (0.5–1.6%)         | 0.2% (0.1–0.3%)           | 0.1% (0.1–0.1%)        | 0% (0–0%)              |
|                                               | Percent (proportion)† | 21.0%                  | 28.4%                   | 40.9%                     | 7.8%                   | 2.0%                   |
| Jordan                                        | Number                | 1252 (734–1967)        | 1499 (574–2986)         | 2358 (1461–3722)          | 597 (460–773)          | 139 (111–172)          |
|                                               | Percent (all-cause)*  | 0.4% (0.2–0.5%)        | 0.9% (0.4–1.8%)         | 0.3% (0.2–0.4%)           | 0.1% (0.1–0.2%)        | 0.1% (0–0.1%)          |
|                                               | Percent (proportion)† | 21.4%                  | 25.6%                   | 40.3%                     | 10.2%                  | 2.4%                   |
| Kuwait                                        | Number                | 321 (194–523)          | 367 (137–763)           | 830 (470–1427)            | 224 (165–308)          | 45 (36–56)             |
|                                               | Percent (all-cause)*  | 0.6% (0.3–0.9%)        | 1.1% (0.4–2.2%)         | 0.2% (0.1–0.3%)           | 0.1% (0.1–0.2%)        | 0.1% (0–0.1%)          |
|                                               | Percent (proportion)† | 18.0%                  | 20.5%                   | 46.4%                     | 12.6%                  | 2.5%                   |
| Lebanon                                       | Number                | 342 (161–614)          | 481 (165–997)           | 1103 (697–1700)           | 461 (349–596)          | 219 (169–273)          |
|                                               | Percent (all-cause)*  | 0.3% (0.2–0.6%)        | 1% (0.3–2%)             | 0.2% (0.2–0.4%)           | 0.1% (0.1–0.2%)        | 0.1% (0–0.1%)          |
|                                               | Percent (proportion)† | 13.1%                  | 18.4%                   | 42.3%                     | 17.7%                  | 8.4%                   |
| Libya                                         | Number                | 299 (163–473)          | 528 (216–1011)          | 1764 (1203–2499)          | 566 (433–738)          | 151 (121–184)          |
|                                               | Percent (all-cause)*  | 0.3% (0.2–0.4%)        | 0.7% (0.3–1.2%)         | 0.2% (0.1–0.3%)           | 0.1% (0.1–0.2%)        | 0.1% (0.1–0.1%)        |
|                                               | Percent (proportion)† | 9.0%                   | 16.0%                   | 53.3%                     | 17.1%                  | 4.6%                   |
| Morocco                                       | Number                | 2352 (964–4392)        | 3639 (1141–7403)        | 6587 (3652–10728)         | 3104 (2305–4093)       | 836 (613–1046)         |
|                                               | Percent (all-cause)*  | 0.2% (0.1–0.4%)        | 0.8% (0.3–1.6%)         | 0.2% (0.1–0.3%)           | 0.1% (0.1–0.1%)        | 0% (0–0.1%)            |
|                                               | Percent (proportion)† | 14.2%                  | 22.0%                   | 39.9%                     | 18.8%                  | 5.1%                   |
| Palestine                                     | Number                | 570 (337–874)          | 686 (251–1292)          | 930 (547–1481)            | 203 (156–260)          | 55 (45–67)             |
|                                               | Percent (all-cause)*  | 0.4% (0.2–0.6%)        | 0.8% (0.3–1.6%)         | 0.2% (0.1–0.4%)           | 0.1% (0.1–0.1%)        | 0% (0–0.1%)            |
|                                               | Percent (proportion)† | 23.3%                  | 28.1%                   | 38.1%                     | 8.3%                   | 2.3%                   |
| Oman                                          | Number                | 312 (161–545)          | 380 (148–778)           | 881 (522–1402)            | 163 (113–225)          | 34 (25–46)             |
|                                               | Percent (all-cause)*  | 0.4% (0.2–0.6%)        | 0.9% (0.4–1.6%)         | 0.2% (0.1–0.3%)           | 0.1% (0.1–0.1%)        | 0% (0–0.1%)            |
|                                               | Percent (proportion)† | 17.6%                  | 21.4%                   | 49.8%                     | 9.2%                   | 1.9%                   |
| Qatar                                         | Number                | 188 (118–286)          | 184 (83–357)            | 650 (383–1056)            | 129 (95–177)           | 12 (9–15)              |
|                                               | Percent (all-cause)*  | 0.8% (0.5–1.2%)        | 1.2% (0.6–2.2%)         | 0.2% (0.1–0.3%)           | 0.1% (0.1–0.2%)        | 0.1% (0.1–0.1%)        |
|                                               | Percent (proportion)† | 16.2%                  | 15.8%                   | 55.9%                     | 11.1%                  | 1.0%                   |
| Saudi Arabia                                  | Number                | 1869 (913–3370)        | 3232 (1060–6878)        | 11743 (6245–19385)        | 2382 (1717–3233)       | 430 (347–516)          |
|                                               | Percent (all-cause)*  | 0.6% (0.3–1.1%)        | 1.3% (0.4–2.6%)         | 0.2% (0.1–0.4%)           | 0.1% (0.1–0.2%)        | 0.1% (0.1–0.1%)        |
|                                               | Percent (proportion)† | 9.5%                   | 16.4%                   | 59.7%                     | 12.1%                  | 2.2%                   |
| Syrian Arab Republic                          | Number                | 1109 (631–1742)        | 1894 (871–3515)         | 2552 (1483–4027)          | 1004 (752–1311)        | 341 (276–419)          |
|                                               | Percent (all-cause)*  | 0.3% (0.2–0.5%)        | 0.7% (0.3–1.3%)         | 0.2% (0.1–0.3%)           | 0.1% (0.1–0.1%)        | 0.1% (0–0.1%)          |
|                                               | Percent (proportion)† | 16.1%                  | 27.5%                   | 37.0%                     | 14.6%                  | 4.9%                   |
| Tunisia                                       | Number                | 540 (265–931)          | 873 (316–1762)          | 1896 (1173–2884)          | 1036 (767–1376)        | 377 (292–478)          |
|                                               | Percent (all-cause)*  | 0.3% (0.1–0.5%)        | 0.8% (0.3–1.6%)         | 0.2% (0.1–0.3%)           | 0.1% (0.1–0.1%)        | 0.1% (0–0.1%)          |
|                                               | Percent (proportion)† | 11.4%                  | 18.5%                   | 40.1%                     | 21.9%                  | 8.0%                   |

**Table S29** Age-specific disability and death related to other neurological disorders in North Africa and Middle East countries in 2019

|                              |                       | <b>Under 5</b>    | <b>5-14 years</b> | <b>15-49 years</b>  | <b>50-69 years</b>  | <b>70+ years</b>    |
|------------------------------|-----------------------|-------------------|-------------------|---------------------|---------------------|---------------------|
|                              |                       | Mean (95% UI)     | Mean (95% UI)     | Mean (95% UI)       | Mean (95% UI)       | Mean (95% UI)       |
| Türkiye                      | Number                | 9777 (6739–13551) | 9734 (4522–17471) | 25485 (16350–37650) | 10996 (8304–14119)  | 5436 (4452–6542)    |
|                              | Percent (all-cause)*  | 0.7% (0.5–0.9%)   | 1.4% (0.7–2.5%)   | 0.4% (0.3–0.6%)     | 0.2% (0.1–0.2%)     | 0.1% (0.1–0.1%)     |
|                              | Percent (proportion)† | 15.9%             | 15.8%             | 41.5%               | 17.9%               | 8.8%                |
| United Arab Emirates         | Number                | 272 (122–487)     | 677 (260–1323)    | 5764 (3677–8466)    | 1335 (836–1938)     | 46 (30–64)          |
|                              | Percent (all-cause)*  | 0.7% (0.3–1.3%)   | 1.4% (0.5–2.7%)   | 0.4% (0.3–0.6%)     | 0.2% (0.2–0.3%)     | 0.1% (0.1–0.1%)     |
|                              | Percent (proportion)† | 3.4%              | 8.4%              | 71.2%               | 16.5%               | 0.6%                |
| Yemen                        | Number                | 2915 (1458–5018)  | 3978 (1381–8221)  | 4316 (2194–7369)    | 935 (691–1261)      | 254 (198–319)       |
|                              | Percent (all-cause)*  | 0.1% (0.0–0.1%)   | 0.4% (0.1–0.8%)   | 0.1% (0.1–0.2%)     | 0.1% (0.0–0.1%)     | 0% (0–0%)           |
|                              | Percent (proportion)† | 23.5%             | 32.1%             | 34.8%               | 7.5%                | 2.0%                |
| Afghanistan                  | Number                | 6042 (3167–9889)  | 5587 (1786–11592) | 7405 (3956–12524)   | 1207 (880–1609)     | 247 (184–318)       |
|                              | Percent (all-cause)*  | 0.1% (0.0–0.1%)   | 0.4% (0.1–0.9%)   | 0.1% (0.1–0.2%)     | 0.1% (0.0–0.1%)     | 0% (0–0%)           |
|                              | Percent (proportion)† | 29.5%             | 27.3%             | 36.1%               | 5.9%                | 1.2%                |
| Sudan                        | Number                | 6143 (3129–10469) | 5656 (2213–11457) | 7602 (4220–12411)   | 1585 (1140–2149)    | 460 (335–602)       |
|                              | Percent (all-cause)*  | 0.1% (0.1–0.2%)   | 0.6% (0.2–1.2%)   | 0.2% (0.1–0.3%)     | 0.1% (0.1–0.1%)     | 0% (0–0.1%)         |
|                              | Percent (proportion)† | 28.6%             | 26.4%             | 35.4%               | 7.4%                | 2.1%                |
| <b>Deaths</b>                |                       |                   |                   |                     |                     |                     |
| Global                       | Number                | 3750 (2868–4719)  | 2850 (2259–3593)  | 13837 (12508–15559) | 17861 (16764–19066) | 21311 (18910–22698) |
|                              | Percent (all-cause)*  | 0.1% (0.1–0.1%)   | 0.4% (0.3–0.5%)   | 0.2% (0.2–0.2%)     | 0.1% (0.1–0.1%)     | 0.1% (0.1–0.1%)     |
|                              | Percent (proportion)† | 6.3%              | 4.8%              | 23.2%               | 30.0%               | 35.8%               |
| North Africa and Middle East | Number                | 350 (274–450)     | 201 (172–238)     | 1151 (997–1353)     | 918 (774–1077)      | 666 (577–764)       |
|                              | Percent (all-cause)*  | 0.1% (0.1–0.1%)   | 0.4% (0.4–0.5%)   | 0.2% (0.2–0.3%)     | 0.1% (0.1–0.1%)     | 0.1% (0.0–0.1%)     |
|                              | Percent (proportion)† | 10.6%             | 6.1%              | 35.0%               | 27.9%               | 20.3%               |
| Algeria                      | Number                | 17 (11–25)        | 10 (7–12)         | 62 (48–79)          | 46 (35–59)          | 31 (24–40)          |
|                              | Percent (all-cause)*  | 0.1% (0.1–0.1%)   | 0.4% (0.3–0.5%)   | 0.2% (0.2–0.3%)     | 0.1% (0.1–0.1%)     | 0% (0–0%)           |
|                              | Percent (proportion)† | 10.2%             | 5.9%              | 37.3%               | 27.8%               | 18.8%               |
| Bahrain                      | Number                | 1 (0–1)           | 0 (0–1)           | 3 (2–4)             | 3 (2–3)             | 1 (1–1)             |
|                              | Percent (all-cause)*  | 0.8% (0.6–1.1%)   | 1.3% (1–1.7%)     | 0.4% (0.3–0.4%)     | 0.2% (0.1–0.2%)     | 0.1% (0.1–0.1%)     |
|                              | Percent (proportion)† | 8.9%              | 5.5%              | 38.4%               | 33.1%               | 14.1%               |
| Egypt                        | Number                | 46 (25–78)        | 28 (18–42)        | 157 (103–226)       | 201 (127–295)       | 77 (50–113)         |
|                              | Percent (all-cause)*  | 0.1% (0.1–0.2%)   | 0.3% (0.2–0.5%)   | 0.2% (0.1–0.3%)     | 0.1% (0.1–0.1%)     | 0% (0–0%)           |
|                              | Percent (proportion)† | 9.0%              | 5.5%              | 30.9%               | 39.5%               | 15.2%               |
| Iran                         | Number                | 21 (15–29)        | 20 (18–23)        | 151 (141–164)       | 127 (117–140)       | 98 (86–110)         |
|                              | Percent (all-cause)*  | 0.1% (0.1–0.2%)   | 0.5% (0.4–0.5%)   | 0.3% (0.2–0.3%)     | 0.1% (0.1–0.1%)     | 0% (0–0.1%)         |
|                              | Percent (proportion)† | 5.0%              | 4.8%              | 36.2%               | 30.4%               | 23.5%               |
| Iraq                         | Number                | 35 (21–55)        | 32 (24–42)        | 88 (63–124)         | 31 (22–40)          | 15 (12–18)          |
|                              | Percent (all-cause)*  | 0.2% (0.2–0.3%)   | 0.9% (0.7–1.1%)   | 0.2% (0.2–0.3%)     | 0.1% (0.0–0.1%)     | 0% (0–0%)           |
|                              | Percent (proportion)† | 17.3%             | 16.0%             | 43.9%               | 15.3%               | 7.4%                |
| Jordan                       | Number                | 8 (6–12)          | 4 (3–5)           | 18 (15–23)          | 10 (8–13)           | 4 (3–5)             |
|                              | Percent (all-cause)*  | 0.2% (0.2–0.3%)   | 0.6% (0.4–0.7%)   | 0.4% (0.3–0.4%)     | 0.1% (0.1–0.1%)     | 0% (0–0%)           |
|                              | Percent (proportion)† | 18.5%             | 8.9%              | 40.7%               | 22.6%               | 9.2%                |
| Kuwait                       | Number                | 2 (1–3)           | 1 (1–1)           | 5 (4–6)             | 3 (2–4)             | 1 (1–2)             |
|                              | Percent (all-cause)*  | 0.4% (0.3–0.5%)   | 0.8% (0.6–1%)     | 0.2% (0.2–0.3%)     | 0.1% (0.1–0.1%)     | 0% (0–0%)           |
|                              | Percent (proportion)† | 17.4%             | 7.4%              | 39.0%               | 24.6%               | 11.5%               |
| Lebanon                      | Number                | 2 (1–3)           | 1 (1–1)           | 10 (7–15)           | 9 (7–13)            | 9 (7–12)            |
|                              | Percent (all-cause)*  | 0.2% (0.1–0.3%)   | 0.6% (0.4–0.8%)   | 0.3% (0.2–0.4%)     | 0.1% (0.1–0.1%)     | 0% (0–0.1%)         |
|                              | Percent (proportion)† | 4.8%              | 2.9%              | 32.9%               | 30.0%               | 29.4%               |
| Libya                        | Number                | 2 (1–3)           | 1 (1–2)           | 18 (13–25)          | 12 (8–16)           | 6 (5–8)             |
|                              | Percent (all-cause)*  | 0.2% (0.1–0.2%)   | 0.3% (0.2–0.4%)   | 0.2% (0.2–0.3%)     | 0.1% (0.1–0.2%)     | 0% (0–0.1%)         |
|                              | Percent (proportion)† | 4.4%              | 3.0%              | 46.1%               | 30.4%               | 16.1%               |
| Morocco                      | Number                | 10 (5–21)         | 7 (4–9)           | 48 (33–72)          | 61 (40–81)          | 32 (19–44)          |
|                              | Percent (all-cause)*  | 0.1% (0.1–0.2%)   | 0.3% (0.2–0.5%)   | 0.2% (0.1–0.2%)     | 0.1% (0.1–0.1%)     | 0% (0–0%)           |
|                              | Percent (proportion)† | 6.6%              | 4.2%              | 30.3%               | 38.6%               | 20.3%               |
| Palestine                    | Number                | 4 (2–6)           | 2 (1–2)           | 6 (5–8)             | 3 (3–4)             | 2 (2–3)             |
|                              | Percent (all-cause)*  | 0.2% (0.2–0.3%)   | 0.6% (0.4–0.7%)   | 0.3% (0.2–0.3%)     | 0.1% (0.1–0.1%)     | 0% (0–0%)           |
|                              | Percent (proportion)† | 21.7%             | 9.8%              | 37.1%               | 19.1%               | 12.2%               |

**Table S29** Age-specific disability and death related to other neurological disorders in North Africa and Middle East countries in 2019

|                                           |                       | <b>Under 5</b>         | <b>5-14 years</b>      | <b>15-49 years</b>      | <b>50-69 years</b>     | <b>70+ years</b>      |
|-------------------------------------------|-----------------------|------------------------|------------------------|-------------------------|------------------------|-----------------------|
|                                           |                       | Mean (95% UI)          | Mean (95% UI)          | Mean (95% UI)           | Mean (95% UI)          | Mean (95% UI)         |
| Oman                                      | Number                | 2 (1-2)                | 1 (1-1)                | 6 (5-8)                 | 3 (2-4)                | 1 (1-2)               |
|                                           | Percent (all-cause)*  | 0.2% (0.1-0.3%)        | 0.5% (0.4-0.7%)        | 0.2% (0.1-0.2%)         | 0.1% (0-0.1%)          | 0% (0-0%)             |
|                                           | Percent (proportion)† | 12.0%                  | 8.1%                   | 48.7%                   | 21.5%                  | 9.7%                  |
| Qatar                                     | Number                | 1 (1-2)                | 1 (0-1)                | 4 (3-6)                 | 2 (1-3)                | 0 (0-1)               |
|                                           | Percent (all-cause)*  | 0.6% (0.5-0.9%)        | 1.1% (0.8-1.4%)        | 0.2% (0.2-0.3%)         | 0.1% (0.1-0.2%)        | 0% (0-0.1%)           |
|                                           | Percent (proportion)† | 16.2%                  | 7.5%                   | 48.8%                   | 22.1%                  | 5.4%                  |
| Saudi Arabia                              | Number                | 8 (5-14)               | 4 (3-5)                | 80 (57-113)             | 39 (29-51)             | 20 (15-25)            |
|                                           | Percent (all-cause)*  | 0.3% (0.2-0.5%)        | 0.5% (0.4-0.7%)        | 0.2% (0.1-0.2%)         | 0.1% (0.1-0.1%)        | 0.1% (0.1-0.1%)       |
|                                           | Percent (proportion)† | 5.4%                   | 2.7%                   | 53.1%                   | 25.9%                  | 12.9%                 |
| Syrian Arab Republic                      | Number                | 7 (4-10)               | 8 (6-10)               | 20 (14-27)              | 17 (12-24)             | 15 (11-19)            |
|                                           | Percent (all-cause)*  | 0.2% (0.1-0.3%)        | 0.6% (0.5-0.7%)        | 0.2% (0.2-0.2%)         | 0.1% (0-0.1%)          | 0% (0-0%)             |
|                                           | Percent (proportion)† | 10.5%                  | 11.6%                  | 29.6%                   | 25.8%                  | 22.5%                 |
| Tunisia                                   | Number                | 3 (2-4)                | 2 (1-3)                | 16 (11-22)              | 19 (13-27)             | 14 (10-19)            |
|                                           | Percent (all-cause)*  | 0.1% (0.1-0.2%)        | 0.4% (0.3-0.6%)        | 0.2% (0.2-0.3%)         | 0.1% (0.1-0.1%)        | 0% (0-0%)             |
|                                           | Percent (proportion)† | 4.9%                   | 3.7%                   | 29.9%                   | 35.4%                  | 26.1%                 |
| Türkiye                                   | Number                | 80 (57-109)            | 39 (30-51)             | 233 (182-299)           | 229 (176-293)          | 303 (234-380)         |
|                                           | Percent (all-cause)*  | 0.5% (0.4-0.7%)        | 1.6% (1.3-2%)          | 0.6% (0.6-0.8%)         | 0.2% (0.2-0.2%)        | 0.1% (0.1-0.1%)       |
|                                           | Percent (proportion)† | 9.1%                   | 4.4%                   | 26.4%                   | 25.9%                  | 34.2%                 |
| United Arab Emirates                      | Number                | 1 (1-2)                | 2 (1-2)                | 79 (48-123)             | 31 (16-48)             | 2 (1-3)               |
|                                           | Percent (all-cause)*  | 0.3% (0.2-0.5%)        | 1% (0.7-1.5%)          | 0.5% (0.4-0.7%)         | 0.3% (0.2-0.4%)        | 0.1% (0-0.1%)         |
|                                           | Percent (proportion)† | 0.9%                   | 1.4%                   | 69.0%                   | 26.9%                  | 1.8%                  |
| Yemen                                     | Number                | 16 (9-28)              | 8 (6-12)               | 28 (17-41)              | 17 (12-24)             | 7 (5-10)              |
|                                           | Percent (all-cause)*  | 0% (0-0.1%)            | 0.1% (0.1-0.2%)        | 0.1% (0-0.1%)           | 0% (0-0.1%)            | 0% (0-0%)             |
|                                           | Percent (proportion)† | 20.8%                  | 10.9%                  | 36.8%                   | 22.0%                  | 9.5%                  |
| Afghanistan                               | Number                | 39 (22-65)             | 14 (9-20)              | 54 (38-82)              | 23 (16-32)             | 8 (5-12)              |
|                                           | Percent (all-cause)*  | 0% (0-0.1%)            | 0.2% (0.1-0.2%)        | 0.1% (0.1-0.1%)         | 0% (0-0.1%)            | 0% (0-0%)             |
|                                           | Percent (proportion)† | 28.4%                  | 10.0%                  | 39.1%                   | 16.6%                  | 5.9%                  |
| Sudan                                     | Number                | 45 (21-88)             | 17 (10-26)             | 62 (35-97)              | 31 (19-46)             | 17 (10-25)            |
|                                           | Percent (all-cause)*  | 0.1% (0-0.2%)          | 0.3% (0.2-0.4%)        | 0.2% (0.1-0.2%)         | 0.1% (0-0.1%)          | 0% (0-0%)             |
|                                           | Percent (proportion)† | 26.3%                  | 9.7%                   | 36.1%                   | 18.1%                  | 9.7%                  |
| <b>YLDs (Years Lived with Disability)</b> |                       |                        |                        |                         |                        |                       |
| Global                                    | Number                | 246643 (139785-389742) | 593908 (340948-961440) | 862121 (543801-1257081) | 306772 (210192-421960) | 120932 (86864-158974) |
|                                           | Percent (all-cause)*  | 0.9% (0.5-1.4%)        | 0.9% (0.6-1.5%)        | 0.2% (0.1-0.3%)         | 0.1% (0.1-0.2%)        | 0.1% (0.1-0.1%)       |
|                                           | Percent (proportion)† | 11.6%                  | 27.9%                  | 40.5%                   | 14.4%                  | 5.7%                  |
| North Africa and Middle East              | Number                | 27017 (14455-43351)    | 55253 (30063-93238)    | 71132 (42365-110560)    | 18333 (12299-25737)    | 5511 (3922-7311)      |
|                                           | Percent (all-cause)*  | 1.2% (0.6-1.8%)        | 1% (0.6-1.6%)          | 0.2% (0.1-0.3%)         | 0.1% (0.1-0.2%)        | 0.1% (0.1-0.1%)       |
|                                           | Percent (proportion)† | 15.2%                  | 31.2%                  | 40.1%                   | 10.3%                  | 3.1%                  |
| Algeria                                   | Number                | 1867 (444-4101)        | 3515 (804-7996)        | 4438 (1443-8371)        | 1342 (773-2055)        | 446 (309-598)         |
|                                           | Percent (all-cause)*  | 1.3% (0.3-2.7%)        | 1.1% (0.3-2.5%)        | 0.2% (0.1-0.4%)         | 0.1% (0.1-0.2%)        | 0.1% (0.1-0.1%)       |
|                                           | Percent (proportion)† | 16.1%                  | 30.3%                  | 38.2%                   | 11.6%                  | 3.8%                  |
| Bahrain                                   | Number                | 33 (7-73)              | 90 (20-210)            | 209 (71-418)            | 67 (36-111)            | 7 (5-10)              |
|                                           | Percent (all-cause)*  | 1.5% (0.3-3.2%)        | 1.3% (0.3-2.7%)        | 0.2% (0.1-0.4%)         | 0.1% (0.1-0.2%)        | 0.1% (0.1-0.1%)       |
|                                           | Percent (proportion)† | 8.1%                   | 22.3%                  | 51.4%                   | 16.4%                  | 1.8%                  |
| Egypt                                     | Number                | 5582 (1186-11407)      | 9749 (2338-20237)      | 8702 (2735-17372)       | 2394 (1436-3639)       | 674 (475-916)         |
|                                           | Percent (all-cause)*  | 1.5% (0.4-3%)          | 1% (0.3-2.1%)          | 0.2% (0.1-0.4%)         | 0.1% (0.1-0.2%)        | 0.1% (0.1-0.1%)       |
|                                           | Percent (proportion)† | 20.6%                  | 36.0%                  | 32.1%                   | 8.8%                   | 2.5%                  |
| Iran                                      | Number                | 3281 (1727-5489)       | 6881 (3625-11498)      | 9519 (5738-14217)       | 3096 (2104-4344)       | 983 (706-1312)        |
|                                           | Percent (all-cause)*  | 1.5% (0.8-2.4%)        | 1.2% (0.6-1.9%)        | 0.2% (0.1-0.3%)         | 0.1% (0.1-0.2%)        | 0.1% (0.1-0.1%)       |
|                                           | Percent (proportion)† | 13.8%                  | 29.0%                  | 40.1%                   | 13.0%                  | 4.1%                  |
| Iraq                                      | Number                | 2015 (454-4306)        | 4238 (910-9173)        | 4762 (1434-9740)        | 900 (519-1418)         | 260 (180-357)         |
|                                           | Percent (all-cause)*  | 1.2% (0.3-2.5%)        | 1% (0.2-2.1%)          | 0.2% (0.1-0.4%)         | 0.1% (0.1-0.2%)        | 0.1% (0.1-0.1%)       |
|                                           | Percent (proportion)† | 16.6%                  | 34.8%                  | 39.1%                   | 7.4%                   | 2.1%                  |
| Jordan                                    | Number                | 514 (117-1166)         | 1181 (268-2701)        | 1276 (419-2616)         | 277 (171-428)          | 75 (52-102)           |
|                                           | Percent (all-cause)*  | 1.4% (0.3-3%)          | 1.1% (0.3-2.4%)        | 0.2% (0.1-0.4%)         | 0.1% (0.1-0.2%)        | 0.1% (0.1-0.1%)       |
|                                           | Percent (proportion)† | 15.5%                  | 35.5%                  | 38.4%                   | 8.3%                   | 2.2%                  |

**Table S29** Age-specific disability and death related to other neurological disorders in North Africa and Middle East countries in 2019

|                                  |                       | <b>Under 5</b>         | <b>5-14 years</b>      | <b>15-49 years</b>     | <b>50-69 years</b>     | <b>70+ years</b>       |
|----------------------------------|-----------------------|------------------------|------------------------|------------------------|------------------------|------------------------|
|                                  |                       | Mean (95% UI)          | Mean (95% UI)          | Mean (95% UI)          | Mean (95% UI)          | Mean (95% UI)          |
| Kuwait                           | Number                | 140 (32–325)           | 297 (70–698)           | 580 (217–1187)         | 132 (78–215)           | 27 (19–36)             |
|                                  | Percent (all-cause)*  | 1.6% (0.4–3.6%)        | 1.2% (0.3–2.8%)        | 0.2% (0.1–0.4%)        | 0.1% (0.1–0.2%)        | 0.1% (0.1–0.1%)        |
|                                  | Percent (proportion)† | 11.9%                  | 25.2%                  | 49.3%                  | 11.2%                  | 2.3%                   |
| Lebanon                          | Number                | 210 (48–474)           | 408 (92–917)           | 521 (190–1037)         | 180 (111–282)          | 90 (63–121)            |
|                                  | Percent (all-cause)*  | 1.4% (0.3–3.1%)        | 1.1% (0.2–2.4%)        | 0.2% (0.1–0.4%)        | 0.1% (0.1–0.2%)        | 0.1% (0.1–0.1%)        |
|                                  | Percent (proportion)† | 14.9%                  | 29.0%                  | 37.0%                  | 12.8%                  | 6.4%                   |
| Libya                            | Number                | 148 (40–304)           | 435 (123–912)          | 789 (302–1499)         | 195 (123–290)          | 62 (44–83)             |
|                                  | Percent (all-cause)*  | 1% (0.3–2.2%)          | 0.9% (0.3–1.8%)        | 0.2% (0.1–0.3%)        | 0.1% (0.1–0.2%)        | 0.1% (0.1–0.1%)        |
|                                  | Percent (proportion)† | 9.1%                   | 26.7%                  | 48.4%                  | 12.0%                  | 3.8%                   |
| Morocco                          | Number                | 1441 (266–3312)        | 3122 (655–6814)        | 3964 (1244–8052)       | 1276 (735–2065)        | 375 (261–514)          |
|                                  | Percent (all-cause)*  | 1.3% (0.3–2.9%)        | 1.1% (0.2–2.2%)        | 0.2% (0.1–0.4%)        | 0.1% (0.1–0.2%)        | 0.1% (0.1–0.1%)        |
|                                  | Percent (proportion)† | 14.2%                  | 30.7%                  | 39.0%                  | 12.5%                  | 3.7%                   |
| Palestine                        | Number                | 240 (56–520)           | 552 (123–1168)         | 545 (165–1084)         | 101 (60–154)           | 26 (18–36)             |
|                                  | Percent (all-cause)*  | 1.3% (0.3–2.6%)        | 1% (0.2–2%)            | 0.2% (0.1–0.4%)        | 0.1% (0.1–0.2%)        | 0.1% (0.1–0.1%)        |
|                                  | Percent (proportion)† | 16.4%                  | 37.7%                  | 37.2%                  | 6.9%                   | 1.8%                   |
| Oman                             | Number                | 180 (42–406)           | 299 (69–691)           | 520 (173–1039)         | 81 (47–128)            | 16 (11–21)             |
|                                  | Percent (all-cause)*  | 1.2% (0.3–2.6%)        | 1.1% (0.3–2.3%)        | 0.2% (0.1–0.4%)        | 0.1% (0.1–0.2%)        | 0.1% (0.1–0.1%)        |
|                                  | Percent (proportion)† | 16.4%                  | 27.3%                  | 47.5%                  | 7.4%                   | 1.4%                   |
| Qatar                            | Number                | 66 (16–151)            | 134 (33–313)           | 411 (153–824)          | 69 (40–113)            | 4 (3–6)                |
|                                  | Percent (all-cause)*  | 1.7% (0.4–3.7%)        | 1.2% (0.3–2.7%)        | 0.2% (0.1–0.4%)        | 0.1% (0.1–0.2%)        | 0.1% (0.1–0.1%)        |
|                                  | Percent (proportion)† | 9.7%                   | 19.5%                  | 60.1%                  | 10.1%                  | 0.7%                   |
| Saudi Arabia                     | Number                | 1155 (276–2568)        | 2919 (727–6602)        | 7463 (2220–14747)      | 1152 (576–1964)        | 148 (100–201)          |
|                                  | Percent (all-cause)*  | 1.8% (0.4–3.8%)        | 1.5% (0.4–3.2%)        | 0.3% (0.1–0.6%)        | 0.2% (0.1–0.3%)        | 0.1% (0.1–0.1%)        |
|                                  | Percent (proportion)† | 9.0%                   | 22.7%                  | 58.1%                  | 9.0%                   | 1.2%                   |
| Syrian Arab Republic             | Number                | 503 (106–1093)         | 1290 (274–2889)        | 1444 (481–2834)        | 485 (304–738)          | 143 (101–195)          |
|                                  | Percent (all-cause)*  | 1.2% (0.3–2.4%)        | 0.8% (0.2–1.6%)        | 0.2% (0.1–0.3%)        | 0.1% (0.1–0.2%)        | 0.1% (0.1–0.1%)        |
|                                  | Percent (proportion)† | 13.0%                  | 33.4%                  | 37.4%                  | 12.6%                  | 3.7%                   |
| Tunisia                          | Number                | 315 (71–713)           | 717 (160–1629)         | 1038 (385–2038)        | 475 (300–717)          | 183 (129–248)          |
|                                  | Percent (all-cause)*  | 1.2% (0.3–2.7%)        | 1% (0.2–2.1%)          | 0.2% (0.1–0.3%)        | 0.1% (0.1–0.2%)        | 0.1% (0.1–0.1%)        |
|                                  | Percent (proportion)† | 11.5%                  | 26.3%                  | 38.0%                  | 17.4%                  | 6.7%                   |
| Türkiye                          | Number                | 2759 (646–5902)        | 6650 (1545–14473)      | 12044 (3951–24161)     | 4252 (2344–7004)       | 1492 (1036–2066)       |
|                                  | Percent (all-cause)*  | 1.7% (0.4–3.5%)        | 1.4% (0.3–2.8%)        | 0.3% (0.1–0.5%)        | 0.2% (0.1–0.3%)        | 0.1% (0.1–0.1%)        |
|                                  | Percent (proportion)† | 10.1%                  | 24.5%                  | 44.3%                  | 15.6%                  | 5.5%                   |
| United Arab Emirates             | Number                | 186 (45–401)           | 550 (129–1180)         | 1764 (555–3332)        | 322 (152–549)          | 12 (8–17)              |
|                                  | Percent (all-cause)*  | 1.7% (0.4–3.5%)        | 1.5% (0.4–3.3%)        | 0.2% (0.1–0.4%)        | 0.2% (0.1–0.3%)        | 0.1% (0.1–0.1%)        |
|                                  | Percent (proportion)† | 6.6%                   | 19.4%                  | 62.2%                  | 11.4%                  | 0.4%                   |
| Yemen                            | Number                | 1530 (307–3409)        | 3323 (710–7582)        | 2751 (716–5816)        | 423 (257–658)          | 144 (101–194)          |
|                                  | Percent (all-cause)*  | 0.4% (0.1–0.9%)        | 0.7% (0.2–1.6%)        | 0.2% (0.0–0.3%)        | 0.1% (0.1–0.1%)        | 0.1% (0.1–0.1%)        |
|                                  | Percent (proportion)† | 18.7%                  | 40.7%                  | 33.7%                  | 5.2%                   | 1.8%                   |
| Afghanistan                      | Number                | 2610 (426–6090)        | 4503 (826–10510)       | 4345 (1082–9085)       | 463 (262–768)          | 124 (86–170)           |
|                                  | Percent (all-cause)*  | 0.9% (0.2–1.9%)        | 0.8% (0.1–1.7%)        | 0.2% (0.1–0.4%)        | 0.1% (0.1–0.2%)        | 0.1% (0.1–0.1%)        |
|                                  | Percent (proportion)† | 21.7%                  | 37.4%                  | 36.1%                  | 3.8%                   | 1.0%                   |
| Sudan                            | Number                | 2216 (484–5027)        | 4344 (987–10165)       | 3975 (1127–8492)       | 632 (374–993)          | 216 (153–293)          |
|                                  | Percent (all-cause)*  | 0.8% (0.2–1.7%)        | 0.9% (0.2–1.9%)        | 0.2% (0.1–0.4%)        | 0.1% (0.1–0.2%)        | 0.1% (0.1–0.1%)        |
|                                  | Percent (proportion)† | 19.5%                  | 38.2%                  | 34.9%                  | 5.6%                   | 1.9%                   |
| <b>YLLs (Years of Life Lost)</b> |                       |                        |                        |                        |                        |                        |
| Global                           | Number                | 326833 (250003–410930) | 223850 (177426–282126) | 771543 (694367–872149) | 526572 (493571–562807) | 284216 (257255–301458) |
|                                  | Percent (all-cause)*  | 0.1% (0.1–0.1%)        | 0.4% (0.3–0.5%)        | 0.2% (0.2–0.2%)        | 0.1% (0.1–0.1%)        | 0.1% (0.1–0.1%)        |
|                                  | Percent (proportion)† | 15.3%                  | 10.5%                  | 36.2%                  | 24.7%                  | 13.3%                  |
| North Africa and Middle East     | Number                | 30507 (23876–39231)    | 15823 (13544–18782)    | 64197 (55672–75416)    | 27825 (23319–32751)    | 9094 (7929–10474)      |
|                                  | Percent (all-cause)*  | 0.1% (0.1–0.1%)        | 0.4% (0.4–0.5%)        | 0.2% (0.2–0.3%)        | 0.1% (0.1–0.1%)        | 0.1% (0.0–0.1%)        |
|                                  | Percent (proportion)† | 20.7%                  | 10.7%                  | 43.5%                  | 18.9%                  | 6.2%                   |
| Algeria                          | Number                | 1465 (946–2159)        | 760 (567–969)          | 3397 (2631–4324)       | 1393 (1054–1807)       | 421 (319–544)          |
|                                  | Percent (all-cause)*  | 0.1% (0.1–0.1%)        | 0.4% (0.3–0.5%)        | 0.2% (0.2–0.3%)        | 0.1% (0.1–0.1%)        | 0% (0–0%)              |
|                                  | Percent (proportion)† | 19.7%                  | 10.2%                  | 45.7%                  | 18.7%                  | 5.7%                   |

**Table S29** Age-specific disability and death related to other neurological disorders in North Africa and Middle East countries in 2019

|                      |                       | <b>Under 5</b>   | <b>5-14 years</b> | <b>15-49 years</b>  | <b>50-69 years</b> | <b>70+ years</b> |
|----------------------|-----------------------|------------------|-------------------|---------------------|--------------------|------------------|
|                      |                       | Mean (95% UI)    | Mean (95% UI)     | Mean (95% UI)       | Mean (95% UI)      | Mean (95% UI)    |
| Bahrain              | Number                | 61 (43–87)       | 34 (25–44)        | 164 (128–205)       | 79 (61–103)        | 16 (13–21)       |
|                      | Percent (all-cause)*  | 0.8% (0.6–1.1%)  | 1.3% (1.1–1.6%)   | 0.4% (0.3–0.4%)     | 0.2% (0.1–0.2%)    | 0.1% (0.1–0.1%)  |
|                      | Percent (proportion)† | 17.3%            | 9.7%              | 46.3%               | 22.2%              | 4.5%             |
| Egypt                | Number                | 4004 (2211–6874) | 2196 (1387–3289)  | 8706 (5700–12484)   | 6120 (3789–8984)   | 1182 (753–1757)  |
|                      | Percent (all-cause)*  | 0.1% (0.1–0.2%)  | 0.3% (0.2–0.5%)   | 0.2% (0.1–0.3%)     | 0.1% (0.1–0.1%)    | 0% (0–0.1%)      |
|                      | Percent (proportion)† | 18.0%            | 9.9%              | 39.2%               | 27.6%              | 5.3%             |
| Iran                 | Number                | 1835 (1348–2515) | 1584 (1379–1802)  | 8396 (7797–9099)    | 3827 (3508–4193)   | 1300 (1150–1443) |
|                      | Percent (all-cause)*  | 0.1% (0.1–0.2%)  | 0.5% (0.4–0.5%)   | 0.3% (0.3–0.3%)     | 0.1% (0.1–0.1%)    | 0.1% (0–0.1%)    |
|                      | Percent (proportion)† | 10.8%            | 9.3%              | 49.6%               | 22.6%              | 7.7%             |
| Iraq                 | Number                | 3021 (1826–4782) | 2563 (1921–3319)  | 5034 (3575–7017)    | 964 (678–1272)     | 219 (169–273)    |
|                      | Percent (all-cause)*  | 0.2% (0.2–0.3%)  | 0.9% (0.7–1.1%)   | 0.2% (0.2–0.3%)     | 0.1% (0.1–0.1%)    | 0% (0–0%)        |
|                      | Percent (proportion)† | 25.6%            | 21.7%             | 42.7%               | 8.2%               | 1.9%             |
| Jordan               | Number                | 738 (486–1077)   | 318 (240–410)     | 1082 (868–1342)     | 320 (247–410)      | 64 (49–82)       |
|                      | Percent (all-cause)*  | 0.2% (0.2–0.3%)  | 0.6% (0.4–0.7%)   | 0.4% (0.4–0.5%)     | 0.1% (0.1–0.1%)    | 0% (0–0%)        |
|                      | Percent (proportion)† | 29.2%            | 12.6%             | 42.9%               | 12.7%              | 2.5%             |
| Kuwait               | Number                | 181 (124–263)    | 70 (51–96)        | 251 (202–310)       | 93 (72–116)        | 18 (14–24)       |
|                      | Percent (all-cause)*  | 0.4% (0.3–0.5%)  | 0.8% (0.6–1%)     | 0.2% (0.2–0.3%)     | 0.1% (0.1–0.1%)    | 0% (0–0%)        |
|                      | Percent (proportion)† | 29.6%            | 11.5%             | 40.9%               | 15.1%              | 3.0%             |
| Lebanon              | Number                | 133 (65–231)     | 72 (45–108)       | 581 (392–824)       | 281 (202–381)      | 129 (91–172)     |
|                      | Percent (all-cause)*  | 0.2% (0.1–0.3%)  | 0.6% (0.4–0.8%)   | 0.3% (0.3–0.5%)     | 0.1% (0.1–0.2%)    | 0% (0–0.1%)      |
|                      | Percent (proportion)† | 11.1%            | 6.0%              | 48.6%               | 23.5%              | 10.8%            |
| Libya                | Number                | 150 (92–229)     | 93 (67–126)       | 975 (717–1306)      | 371 (258–511)      | 89 (65–116)      |
|                      | Percent (all-cause)*  | 0.2% (0.1–0.2%)  | 0.3% (0.2–0.4%)   | 0.3% (0.2–0.3%)     | 0.1% (0.1–0.2%)    | 0.1% (0–0.1%)    |
|                      | Percent (proportion)† | 9.0%             | 5.5%              | 58.1%               | 22.1%              | 5.3%             |
| Morocco              | Number                | 911 (410–1826)   | 517 (349–743)     | 2622 (1817–3944)    | 1828 (1216–2461)   | 461 (278–636)    |
|                      | Percent (all-cause)*  | 0.1% (0–0.2%)    | 0.3% (0.2–0.5%)   | 0.2% (0.1–0.2%)     | 0.1% (0.1–0.1%)    | 0% (0–0%)        |
|                      | Percent (proportion)† | 14.4%            | 8.2%              | 41.4%               | 28.8%              | 7.3%             |
| Palestine            | Number                | 330 (211–490)    | 133 (100–170)     | 385 (309–480)       | 102 (82–126)       | 29 (23–36)       |
|                      | Percent (all-cause)*  | 0.2% (0.2–0.3%)  | 0.5% (0.4–0.7%)   | 0.3% (0.3–0.4%)     | 0.1% (0.1–0.1%)    | 0% (0–0%)        |
|                      | Percent (proportion)† | 33.7%            | 13.6%             | 39.3%               | 10.4%              | 3.0%             |
| Oman                 | Number                | 133 (91–194)     | 81 (60–104)       | 361 (274–454)       | 83 (51–122)        | 19 (12–28)       |
|                      | Percent (all-cause)*  | 0.2% (0.1–0.3%)  | 0.5% (0.4–0.7%)   | 0.2% (0.1–0.2%)     | 0.1% (0–0.1%)      | 0% (0–0%)        |
|                      | Percent (proportion)† | 19.6%            | 11.9%             | 53.4%               | 12.3%              | 2.8%             |
| Qatar                | Number                | 121 (80–176)     | 50 (38–68)        | 239 (169–345)       | 60 (42–88)         | 7 (5–10)         |
|                      | Percent (all-cause)*  | 0.6% (0.5–0.9%)  | 1.1% (0.8–1.4%)   | 0.3% (0.2–0.3%)     | 0.1% (0.1–0.2%)    | 0.1% (0–0.1%)    |
|                      | Percent (proportion)† | 25.4%            | 10.6%             | 50.0%               | 12.5%              | 1.5%             |
| Saudi Arabia         | Number                | 715 (420–1220)   | 313 (217–429)     | 4279 (3098–6029)    | 1230 (908–1614)    | 282 (216–362)    |
|                      | Percent (all-cause)*  | 0.3% (0.2–0.5%)  | 0.5% (0.4–0.7%)   | 0.2% (0.1–0.2%)     | 0.1% (0.1–0.1%)    | 0.1% (0.1–0.1%)  |
|                      | Percent (proportion)† | 10.5%            | 4.6%              | 62.8%               | 18.0%              | 4.1%             |
| Syrian Arab Republic | Number                | 606 (375–896)    | 605 (460–774)     | 1108 (801–1525)     | 519 (358–718)      | 198 (146–254)    |
|                      | Percent (all-cause)*  | 0.2% (0.1–0.3%)  | 0.6% (0.5–0.7%)   | 0.2% (0.2–0.3%)     | 0.1% (0.1–0.1%)    | 0% (0–0%)        |
|                      | Percent (proportion)† | 20.0%            | 19.9%             | 36.5%               | 17.1%              | 6.5%             |
| Tunisia              | Number                | 226 (132–359)    | 156 (109–220)     | 858 (593–1177)      | 560 (381–802)      | 194 (135–273)    |
|                      | Percent (all-cause)*  | 0.1% (0.1–0.2%)  | 0.4% (0.3–0.6%)   | 0.2% (0.2–0.3%)     | 0.1% (0.1–0.1%)    | 0% (0–0.1%)      |
|                      | Percent (proportion)† | 11.3%            | 7.8%              | 43.0%               | 28.1%              | 9.7%             |
| Türkiye              | Number                | 7018 (4995–9480) | 3084 (2358–4005)  | 13441 (10476–17475) | 6744 (5154–8627)   | 3944 (3071–4960) |
|                      | Percent (all-cause)*  | 0.5% (0.4–0.7%)  | 1.6% (1.2–2%)     | 0.7% (0.6–0.9%)     | 0.2% (0.2–0.2%)    | 0.1% (0.1–0.1%)  |
|                      | Percent (proportion)† | 20.5%            | 9.0%              | 39.3%               | 19.7%              | 11.5%            |
| United Arab Emirates | Number                | 85 (45–152)      | 127 (81–191)      | 4000 (2408–6182)    | 1013 (525–1575)    | 34 (17–52)       |
|                      | Percent (all-cause)*  | 0.3% (0.2–0.5%)  | 1% (0.6–1.4%)     | 0.6% (0.4–0.8%)     | 0.3% (0.2–0.4%)    | 0.1% (0–0.1%)    |
|                      | Percent (proportion)† | 1.6%             | 2.4%              | 76.1%               | 19.3%              | 0.6%             |
| Yemen                | Number                | 1385 (769–2415)  | 655 (451–934)     | 1564 (943–2299)     | 512 (368–733)      | 110 (77–155)     |
|                      | Percent (all-cause)*  | 0% (0–0.1%)      | 0.1% (0.1–0.2%)   | 0.1% (0–0.1%)       | 0% (0–0.1%)        | 0% (0–0%)        |
|                      | Percent (proportion)† | 32.8%            | 15.5%             | 37.0%               | 12.1%              | 2.6%             |
| Afghanistan          | Number                | 3432 (1920–5670) | 1084 (689–1559)   | 3061 (2132–4629)    | 744 (509–1033)     | 123 (77–180)     |

**Table S29** Age-specific disability and death related to other neurological disorders in North Africa and Middle East countries in 2019

|       |                       | <b>Under 5</b>   | <b>5-14 years</b> | <b>15-49 years</b> | <b>50-69 years</b> | <b>70+ years</b> |
|-------|-----------------------|------------------|-------------------|--------------------|--------------------|------------------|
|       |                       | Mean (95% UI)    | Mean (95% UI)     | Mean (95% UI)      | Mean (95% UI)      | Mean (95% UI)    |
| Sudan | Percent (all-cause)*  | 0% (0-0.1%)      | 0.2% (0.1-0.2%)   | 0.1% (0.1-0.1%)    | 0% (0-0.1%)        | 0% (0-0%)        |
|       | Percent (proportion)† | 40.6%            | 12.8%             | 36.2%              | 8.8%               | 1.5%             |
|       | Number                | 3927 (1846-7642) | 1311 (784-2069)   | 3627 (2056-5639)   | 954 (585-1424)     | 245 (142-369)    |
|       | Percent (all-cause)*  | 0.1% (0-0.2%)    | 0.3% (0.2-0.4%)   | 0.2% (0.1-0.3%)    | 0.1% (0-0.1%)      | 0% (0-0%)        |
|       | Percent (proportion)† | 39.0%            | 13.0%             | 36.0%              | 9.5%               | 2.4%             |

DALYs, Disability-Adjusted Life Years; UI, uncertainty interval; YLDs, Years Lived with Disability; YLLs, Years of Life Lost. Count data are absolute numbers and percentage data are rounded to one decimal place. Percentages and number of DALYs, deaths, YLDs, and YLLs are not mutually exclusive: the sum of percentages and number of DALYs, deaths, YLDs, and YLLs in the columns exceeds the totals for all causes combined because of overlap between various causes. Measures with insufficient data are not reported here. \*Percent of all-cause indicates the proportion of the specified measure (ie, DALYs, deaths, YDLs, or YLLs) of other rare neurological conditions out of all causes in the age-group in the region/nation. † Percent proportion indicates the share of the specified measure (ie, DALYs, deaths, YDLs, or YLLs) of other rare neurological conditions in different age-groups in the region/nation. Data in parentheses are 95% uncertainty intervals.

***Table S30 Age-specific disability and death related to neurological disorders in North Africa and Middle East countries in 2019***  
(NEXT PAGE)



**Table S30** Age-specific disability and death related to neurological disorders\* in North Africa and Middle East countries in 2019

|                                               |                       | <b>Under 5</b>            | <b>5-14 years</b>          | <b>15-49 years</b>           | <b>50-69 years</b>           | <b>70+ years</b>             |
|-----------------------------------------------|-----------------------|---------------------------|----------------------------|------------------------------|------------------------------|------------------------------|
|                                               |                       | Mean (95% UI)             | Mean (95% UI)              | Mean (95% UI)                | Mean (95% UI)                | Mean (95% UI)                |
| <b>DALYs (Disability-Adjusted Life Years)</b> |                       |                           |                            |                              |                              |                              |
| Global                                        | Number                | 1993164 (1555437–2540999) | 6497875 (3018666–11643430) | 41432965 (15450293–80087515) | 18680973 (10959114–30217067) | 29119435 (17421613–54106052) |
|                                               | Percent (all-cause)†  | 0.4% (0.3–0.6%)           | 5.5% (2.6–9.4%)            | 5.2% (2.9–5%)                | 2.8% (1.6–4.3%)              | 6% (3.6–11.2%)               |
|                                               | Percent (proportion)‡ | 2.0%                      | 6.6%                       | 42.4%                        | 19.1%                        | 29.8%                        |
| North Africa and Middle East                  | Number                | 202209 (145302–267004)    | 701924 (289581–1406235)    | 3853748 (1453556–7607634)    | 1110082 (648417–1792734)     | 1288077 (755661–2469828)     |
|                                               | Percent (all-cause)†  | 0.7% (0.5–0.9%)           | 7.4% (3.1–13.5%)           | 6.1% (2.4–11.1%)             | 2.7% (1.6–4.3%)              | 5.7% (3.4–11%)               |
|                                               | Percent (proportion)‡ | 2.8%                      | 9.8%                       | 53.9%                        | 15.5%                        | 18.0%                        |
| Algeria                                       | Number                | 12112 (6253–20726)        | 43222 (16788–89562)        | 257787 (100058–507996)       | 81616 (44667–133306)         | 100041 (56786–197682)        |
|                                               | Percent (all-cause)†  | 0.7% (0.4–1.2%)           | 8.3% (3.4–15.3%)           | 6.8% (2.7–12.5%)             | 3.3% (2–5.4%)                | 5.8% (3.4–11.7%)             |
|                                               | Percent (proportion)‡ | 2.4%                      | 8.7%                       | 52.1%                        | 16.5%                        | 20.2%                        |
| Bahrain                                       | Number                | 218 (118–360)             | 1022 (336–2066)            | 10191 (4048–19454)           | 3268 (1833–5347)             | 1395 (818–2656)              |
|                                               | Percent (all-cause)†  | 2.2% (1.2–3.7%)           | 10.3% (3.9–18.4%)          | 7.2% (3–12.5%)               | 3.4% (2–5.4%)                | 4.8% (2.9–9.2%)              |
|                                               | Percent (proportion)‡ | 1.4%                      | 6.4%                       | 63.3%                        | 20.3%                        | 8.7%                         |
| Egypt                                         | Number                | 26953 (10584–47984)       | 138064 (41206–291534)      | 575578 (187655–1164630)      | 167695 (98500–269794)        | 142197 (84776–265422)        |
|                                               | Percent (all-cause)†  | 0.8% (0.3–1.5%)           | 8.2% (2.5–15.8%)           | 6.3% (2.1–12%)               | 1.9% (1.2–3.1%)              | 3.8% (2.3–7.1%)              |
|                                               | Percent (proportion)‡ | 2.6%                      | 13.1%                      | 54.8%                        | 16.0%                        | 13.5%                        |
| Iran                                          | Number                | 17762 (11538–26112)       | 76033 (33570–143529)       | 575237 (215087–1131424)      | 190449 (108969–308676)       | 243978 (140564–470151)       |
|                                               | Percent (all-cause)†  | 1.1% (0.8–1.7%)           | 8% (3.6–14%)               | 6.7% (2.6–12.1%)             | 3.6% (2.1–5.7%)              | 6.9% (4.1–13.1%)             |
|                                               | Percent (proportion)‡ | 1.6%                      | 6.9%                       | 52.1%                        | 17.3%                        | 22.1%                        |
| Iraq                                          | Number                | 12146 (5925–20779)        | 53341 (19690–110206)       | 257013 (93720–520890)        | 55466 (29698–92173)          | 59797 (34479–114100)         |
|                                               | Percent (all-cause)†  | 0.8% (0.4–1.4%)           | 7.3% (2.7–13.6%)           | 5.7% (2.2–10.7%)             | 2.3% (1.3–3.9%)              | 5.1% (3–9.8%)                |
|                                               | Percent (proportion)‡ | 2.8%                      | 12.2%                      | 58.7%                        | 12.7%                        | 13.7%                        |
| Jordan                                        | Number                | 3131 (1574–5621)          | 14447 (4803–30070)         | 69015 (24527–139714)         | 16406 (8871–27578)           | 15081 (8891–28373)           |
|                                               | Percent (all-cause)†  | 0.9% (0.5–1.6%)           | 8.7% (3.1–16.6%)           | 7.8% (2.9–14.4%)             | 3.4% (1.9–5.5%)              | 5.8% (3.5–11.2%)             |
|                                               | Percent (proportion)‡ | 2.7%                      | 12.2%                      | 58.4%                        | 13.9%                        | 12.8%                        |
| Kuwait                                        | Number                | 859 (453–1548)            | 3405 (1210–6740)           | 31861 (11104–63371)          | 6600 (3514–11119)            | 6547 (3639–12421)            |
|                                               | Percent (all-cause)†  | 1.5% (0.8–2.7%)           | 10.1% (3.8–18.1%)          | 7.6% (2.8–13.8%)             | 3.8% (2.1–6.2%)              | 8.4% (4.7–16.3%)             |
|                                               | Percent (proportion)‡ | 1.7%                      | 6.9%                       | 64.7%                        | 13.4%                        | 13.3%                        |
| Lebanon                                       | Number                | 1136 (510–2100)           | 4857 (1519–10100)          | 30825 (11084–60680)          | 10923 (6152–17835)           | 22025 (12247–42981)          |
|                                               | Percent (all-cause)†  | 1.1% (0.5–2.2%)           | 9.5% (3.2–17.8%)           | 6.7% (2.5–12.4%)             | 2.9% (1.6–4.7%)              | 6.1% (3.5–11.9%)             |
|                                               | Percent (proportion)‡ | 1.6%                      | 7.0%                       | 44.2%                        | 15.7%                        | 31.6%                        |
| Libya                                         | Number                | 1109 (604–1741)           | 5978 (1945–12551)          | 47320 (18202–92257)          | 12831 (7412–21166)           | 17352 (9480–34116)           |
|                                               | Percent (all-cause)†  | 1% (0.6–1.6%)             | 7.5% (2.7–14.4%)           | 5.6% (2.2–10.2%)             | 3% (1.8–4.7%)                | 7.3% (4.1–14.3%)             |
|                                               | Percent (proportion)‡ | 1.3%                      | 7.1%                       | 55.9%                        | 15.2%                        | 20.5%                        |
| Morocco                                       | Number                | 7051 (2559–13950)         | 37235 (11559–76048)        | 217159 (76839–437641)        | 82995 (48134–135477)         | 91368 (52492–177110)         |
|                                               | Percent (all-cause)†  | 0.7% (0.2–1.3%)           | 8.3% (2.7–15.7%)           | 6.3% (2.4–11.6%)             | 2.5% (1.5–3.9%)              | 5.1% (3–10%)                 |
|                                               | Percent (proportion)‡ | 1.6%                      | 8.5%                       | 49.8%                        | 19.0%                        | 21.0%                        |
| Palestine                                     | Number                | 1691 (935–2700)           | 7075 (2466–14431)          | 29177 (11146–57355)          | 6236 (3528–10253)            | 6145 (3593–12006)            |
|                                               | Percent (all-cause)†  | 1.1% (0.6–1.7%)           | 8.6% (3.1–15.8%)           | 7.2% (2.9–12.9%)             | 2.7% (1.5–4.3%)              | 4.9% (2.9–9.4%)              |
|                                               | Percent (proportion)‡ | 3.4%                      | 14.1%                      | 58.0%                        | 12.4%                        | 12.2%                        |
| Oman                                          | Number                | 846 (325–1681)            | 3399 (1061–7196)           | 31098 (10488–61978)          | 4533 (2488–7572)             | 3311 (2006–6207)             |
|                                               | Percent (all-cause)†  | 1% (0.4–1.9%)             | 7.7% (2.5–14.6%)           | 6.3% (2.2–11.6%)             | 2.7% (1.5–4.5%)              | 4.3% (2.6–8.1%)              |
|                                               | Percent (proportion)‡ | 2.0%                      | 7.9%                       | 72.0%                        | 10.5%                        | 7.7%                         |
| Qatar                                         | Number                | 398 (200–713)             | 1511 (515–3068)            | 21009 (8053–41459)           | 3157 (1716–5155)             | 759 (462–1355)               |
|                                               | Percent (all-cause)†  | 1.8% (0.9–3.1%)           | 9.7% (3.6–17.8%)           | 7% (2.7–12.6%)               | 3.3% (1.9–5.4%)              | 4.1% (2.5–7.3%)              |
|                                               | Percent (proportion)‡ | 1.5%                      | 5.6%                       | 78.3%                        | 11.8%                        | 2.8%                         |
| Saudi Arabia                                  | Number                | 5430 (2176–10690)         | 29027 (9291–60167)         | 291972 (121411–543436)       | 52800 (30159–84256)          | 31223 (18569–57070)          |
|                                               | Percent (all-cause)†  | 1.8% (0.7–3.6%)           | 11.2% (4–20.5%)            | 5.6% (2.4–9.9%)              | 2.6% (1.5–4.1%)              | 5.7% (3.5–10.4%)             |

**Table S30** Age-specific disability and death related to neurological disorders\* in North Africa and Middle East countries in 2019

|                              |                        | <b>Under 5</b>      | <b>5-14 years</b>    | <b>15-49 years</b>      | <b>50-69 years</b>     | <b>70+ years</b>         |
|------------------------------|------------------------|---------------------|----------------------|-------------------------|------------------------|--------------------------|
|                              |                        | Mean (95% UI)       | Mean (95% UI)        | Mean (95% UI)           | Mean (95% UI)          | Mean (95% UI)            |
| Syrian Arab Republic         | Percent (proportion) ‡ | 1.3%                | 7.1%                 | 71.1%                   | 12.9%                  | 7.6%                     |
|                              | Number                 | 2745 (1266–4873)    | 17325 (5471–36640)   | 82134 (27704–168531)    | 31723 (17509–53504)    | 31330 (17985–60561)      |
|                              | Percent (all-cause)†   | 0.8% (0.4–1.5%)     | 6.3% (2.1–12.2%)     | 6% (2.1–11.3%)          | 2.4% (1.4–4%)          | 4.6% (2.7–9%)            |
| Tunisia                      | Percent (proportion) ‡ | 1.7%                | 10.5%                | 49.7%                   | 19.2%                  | 19.0%                    |
|                              | Number                 | 1957 (951–3435)     | 9814 (3172–20462)    | 68294 (23405–135155)    | 30078 (16245–49217)    | 44232 (24685–88139)      |
|                              | Percent (all-cause)†   | 1% (0.5–1.8%)       | 9% (3.2–17.1%)       | 6.9% (2.5–12.6%)        | 3.3% (1.9–5.4%)        | 6.5% (3.7–12.8%)         |
| Türkiye                      | Percent (proportion) ‡ | 1.3%                | 6.4%                 | 44.2%                   | 19.5%                  | 28.7%                    |
|                              | Number                 | 35095 (24581–49307) | 75495 (30235–141255) | 542136 (219424–1027446) | 228193 (136281–360950) | 351071 (204017–665144)   |
|                              | Percent (all-cause)†   | 2.4% (1.7–3.2%)     | 10.9% (5–18.5%)      | 8.1% (3.5–14.1%)        | 3.8% (2.3–5.7%)        | 7.4% (4.4–14%)           |
| United Arab Emirates         | Percent (proportion) ‡ | 2.8%                | 6.1%                 | 44.0%                   | 18.5%                  | 28.5%                    |
|                              | Number                 | 904 (379–1698)      | 5357 (1935–10687)    | 81676 (37538–146281)    | 14898 (9033–22737)     | 2111 (1298–3746)         |
|                              | Percent (all-cause)†   | 2.5% (1.1–4.6%)     | 10.7% (4.3–19.2%)    | 5.6% (2.8–9.6%)         | 2.8% (1.7–4.3%)        | 4.4% (2.8–7.8%)          |
| Yemen                        | Percent (proportion) ‡ | 0.9%                | 5.1%                 | 77.8%                   | 14.2%                  | 2.0%                     |
|                              | Number                 | 13668 (7543–21924)  | 48406 (16529–99072)  | 172615 (59949–348645)   | 31430 (17823–53374)    | 32238 (18358–63757)      |
|                              | Percent (all-cause)†   | 0.3% (0.2–0.5%)     | 4.7% (1.7–9%)        | 4.2% (1.5–7.9%)         | 2.1% (1.2–3.3%)        | 4.2% (2.4–8.5%)          |
| Afghanistan                  | Percent (proportion) ‡ | 4.6%                | 16.2%                | 57.9%                   | 10.5%                  | 10.8%                    |
|                              | Number                 | 31249 (14580–49425) | 64609 (25851–127835) | 220000 (90517–420876)   | 33786 (19508–54136)    | 33035 (18781–65400)      |
|                              | Percent (all-cause)†   | 0.4% (0.2–0.6%)     | 5% (2.1–9.3%)        | 4% (1.8–7.4%)           | 1.7% (1.2–7%)          | 3.8% (2.2–7.6%)          |
| Sudan                        | Percent (proportion) ‡ | 8.2%                | 16.9%                | 57.5%                   | 8.8%                   | 8.6%                     |
|                              | Number                 | 25546 (14287–40174) | 61587 (23303–124422) | 237738 (85950–480273)   | 43872 (24269–72586)    | 51533 (30027–101185)     |
|                              | Percent (all-cause)†   | 0.5% (0.3–0.8%)     | 6.5% (2.6–11.9%)     | 5.8% (2.2–10.9%)        | 2.4% (1.3–3.9%)        | 4.7% (2.8–9.2%)          |
|                              | Percent (proportion) ‡ | 6.1%                | 14.7%                | 56.6%                   | 10.4%                  | 12.3%                    |
| <b>Deaths</b>                |                        |                     |                      |                         |                        |                          |
| Global                       | Number                 | 12603 (10265–15812) | 10428 (8879–12166)   | 82670 (74302–94972)     | 215503 (131638–419907) | 1900121 (789382–4296570) |
|                              | Percent (all-cause)†   | 0.2% (0.2–0.3%)     | 1.5% (1.3–1.8%)      | 1.1% (1–1.3%)           | 1.4% (0.9–2.8%)        | 6.7% (2.7–15.4%)         |
|                              | Percent (proportion) ‡ | 0.6%                | 0.5%                 | 3.7%                    | 9.7%                   | 85.5%                    |
| North Africa and Middle East | Number                 | 1195 (809–1551)     | 938 (726–1244)       | 6024 (5013–7238)        | 12068 (6920–24490)     | 79402 (32093–182869)     |
|                              | Percent (all-cause)†   | 0.4% (0.3–0.5%)     | 1.9% (1.5–2.5%)      | 1.2% (1.1–1.4%)         | 1.3% (0.8–2.7%)        | 6% (2.4–14.3%)           |
|                              | Percent (proportion) ‡ | 1.2%                | 0.9%                 | 6.0%                    | 12.1%                  | 79.7%                    |
| Algeria                      | Number                 | 61 (37–87)          | 54 (41–72)           | 378 (289–487)           | 844 (402–1890)         | 5854 (2315–14428)        |
|                              | Percent (all-cause)†   | 0.4% (0.2–0.5%)     | 2.1% (1.6–2.8%)      | 1.3% (1.1–1.6%)         | 1.7% (0.9–3.8%)        | 5.6% (2.2–13.9%)         |
|                              | Percent (proportion) ‡ | 0.8%                | 0.7%                 | 5.3%                    | 11.7%                  | 81.4%                    |
| Bahrain                      | Number                 | 1 (1–2)             | 1 (1–2)              | 16 (12–21)              | 30 (15–64)             | 75 (32–170)              |
|                              | Percent (all-cause)†   | 1.3% (1.1–1.6%)     | 3.5% (2.8–4.8%)      | 1.9% (1.6–2.3%)         | 1.8% (1.3–6%)          | 4.7% (2.1–11.2%)         |
|                              | Percent (proportion) ‡ | 0.9%                | 0.9%                 | 12.9%                   | 24.5%                  | 60.8%                    |
| Egypt                        | Number                 | 76 (49–114)         | 127 (57–402)         | 592 (426–812)           | 1970 (1100–3901)       | 7910 (3203–17849)        |
|                              | Percent (all-cause)†   | 0.2% (0.2–0.3%)     | 1.5% (0.7–4.6%)      | 0.8% (0.6–0.9%)         | 0.9% (0.5–1.7%)        | 3.6% (1.5–8.3%)          |
|                              | Percent (proportion) ‡ | 0.7%                | 1.2%                 | 5.5%                    | 18.5%                  | 74.1%                    |
| Iran                         | Number                 | 66 (41–91)          | 87 (77–100)          | 784 (693–968)           | 1896 (1026–3924)       | 15505 (5965–36346)       |
|                              | Percent (all-cause)†   | 0.4% (0.3–0.6%)     | 2% (1.8–2.3%)        | 1.3% (1.2–1.7%)         | 1.9% (1.3–8%)          | 7.3% (2.8–17.3%)         |
|                              | Percent (proportion) ‡ | 0.4%                | 0.5%                 | 4.3%                    | 10.3%                  | 84.6%                    |
| Iraq                         | Number                 | 55 (34–84)          | 65 (53–81)           | 336 (239–472)           | 551 (263–1224)         | 3648 (1437–8180)         |
|                              | Percent (all-cause)†   | 0.4% (0.3–0.5%)     | 1.8% (1.5–2.1%)      | 0.9% (0.8–1.1%)         | 1% (0.5–2.1%)          | 5.4% (2.1–13%)           |
|                              | Percent (proportion) ‡ | 1.2%                | 1.4%                 | 7.2%                    | 11.8%                  | 78.4%                    |
| Jordan                       | Number                 | 14 (10–20)          | 12 (10–15)           | 77 (59–96)              | 149 (74–324)           | 842 (340–1902)           |
|                              | Percent (all-cause)†   | 0.4% (0.3–0.5%)     | 1.7% (1.4–2%)        | 1.6% (1.3–1.9%)         | 1.6% (0.8–3.4%)        | 6.2% (2.5–14.4%)         |
|                              | Percent (proportion) ‡ | 1.3%                | 1.1%                 | 7.0%                    | 13.6%                  | 77.0%                    |
| Kuwait                       | Number                 | 4 (3–5)             | 4 (3–5)              | 30 (24–39)              | 53 (24–121)            | 441 (157–1015)           |
|                              | Percent (all-cause)†   | 0.7% (0.6–0.9%)     | 3.7% (3.1–4.4%)      | 1.4% (1.2–1.8%)         | 1.9% (0.9–4.3%)        | 9.7% (3.4–23.2%)         |

**Table S30** Age-specific disability and death related to neurological disorders\* in North Africa and Middle East countries in 2019

|                                           |                        | <b>Under 5</b>          | <b>5-14 years</b>          | <b>15-49 years</b>           | <b>50-69 years</b>          | <b>70+ years</b>           |
|-------------------------------------------|------------------------|-------------------------|----------------------------|------------------------------|-----------------------------|----------------------------|
|                                           |                        | Mean (95% UI)           | Mean (95% UI)              | Mean (95% UI)                | Mean (95% UI)               | Mean (95% UI)              |
| Lebanon                                   | Percent (proportion) ‡ | 0·8%                    | 0·8%                       | 5·6%                         | 9·9%                        | 83·0%                      |
|                                           | Number                 | 4 (2–7)                 | 4 (3–6)                    | 45 (32–60)                   | 115 (57–250)                | 1411 (511–3442)            |
|                                           | Percent (all-cause)†   | 0·4% (0·2–0·6%)         | 2·4% (1·6–3·4%)            | 1·4% (1·1–1·8%)              | 1·4% (0·7–3·1%)             | 6·6% (2·4–15·6%)           |
| Libya                                     | Percent (proportion) ‡ | 0·3%                    | 0·2%                       | 2·8%                         | 7·3%                        | 89·4%                      |
|                                           | Number                 | 7 (4–10)                | 6 (4–8)                    | 87 (64–116)                  | 144 (76–295)                | 1194 (437–2779)            |
|                                           | Percent (all-cause)†   | 0·6% (0·4–0·8%)         | 1·5% (1·1–2·2%)            | 1·2% (1–1·4%)                | 1·6% (0·9–3·2%)             | 8·7% (3·2–20·1%)           |
| Morocco                                   | Percent (proportion) ‡ | 0·5%                    | 0·4%                       | 6·1%                         | 10·1%                       | 83·0%                      |
|                                           | Number                 | 21 (10–39)              | 31 (14–63)                 | 286 (148–570)                | 959 (484–1975)              | 5620 (2233–13028)          |
|                                           | Percent (all-cause)†   | 0·2% (0·1–0·3%)         | 1·6% (0·8–3·3%)            | 1·1% (0·6–1·9%)              | 1·2% (0·7–2·5%)             | 5·1% (2·1–12·4%)           |
| Palestine                                 | Percent (proportion) ‡ | 0·3%                    | 0·4%                       | 4·1%                         | 13·9%                       | 81·2%                      |
|                                           | Number                 | 9 (6–14)                | 9 (7–12)                   | 51 (43–60)                   | 65 (37–134)                 | 375 (156–917)              |
|                                           | Percent (all-cause)†   | 0·6% (0·5–0·8%)         | 2·8% (2·3–3·8%)            | 2·2% (2–2·6%)                | 1·3% (0·7–2·6%)             | 5·1% (2·1–12%)             |
| Oman                                      | Percent (proportion) ‡ | 1·8%                    | 1·7%                       | 10·0%                        | 12·7%                       | 73·7%                      |
|                                           | Number                 | 2 (2–3)                 | 2 (2–3)                    | 23 (18–29)                   | 41 (20–91)                  | 189 (86–425)               |
|                                           | Percent (all-cause)†   | 0·3% (0·2–0·3%)         | 1·1% (0·8–1·4%)            | 0·7% (0·5–0·8%)              | 1·2% (0·6–2·6%)             | 4·3% (1·9–9·8%)            |
| Qatar                                     | Percent (proportion) ‡ | 0·9%                    | 0·8%                       | 8·8%                         | 16·0%                       | 73·6%                      |
|                                           | Number                 | 2 (1–2)                 | 1 (1–2)                    | 17 (12–25)                   | 26 (12–58)                  | 36 (17–79)                 |
|                                           | Percent (all-cause)†   | 0·8% (0·6–1·1%)         | 2·3% (1·9–2·8%)            | 1% (0·8–1·3%)                | 1·7% (0·8–3·8%)             | 3·9% (1·9–8·3%)            |
| Saudi Arabia                              | Percent (proportion) ‡ | 2·2%                    | 1·6%                       | 20·7%                        | 31·5%                       | 44·0%                      |
|                                           | Number                 | 14 (8–23)               | 18 (13–24)                 | 619 (438–885)                | 532 (302–1052)              | 1901 (826–4116)            |
|                                           | Percent (all-cause)†   | 0·5% (0·3–0·9%)         | 2·3% (1·8–3·1%)            | 1·2% (1–1·5%)                | 1·2% (0·7–2·3%)             | 6·4% (2·8–14·2%)           |
| Syrian Arab Republic                      | Percent (proportion) ‡ | 0·5%                    | 0·6%                       | 20·1%                        | 17·2%                       | 61·7%                      |
|                                           | Number                 | 11 (7–15)               | 14 (11–19)                 | 91 (62–128)                  | 316 (142–705)               | 1777 (699–4311)            |
|                                           | Percent (all-cause)†   | 0·3% (0·2–0·4%)         | 1% (0·8–1·4%)              | 0·9% (0·7–1·1%)              | 1·1% (0·5–2·3%)             | 4·5% (1·8–10·8%)           |
| Tunisia                                   | Percent (proportion) ‡ | 0·5%                    | 0·6%                       | 4·1%                         | 14·3%                       | 80·5%                      |
|                                           | Number                 | 9 (5–14)                | 10 (7–14)                  | 91 (61–128)                  | 323 (148–758)               | 2796 (1016–6695)           |
|                                           | Percent (all-cause)†   | 0·5% (0·3–0·7%)         | 2·3% (1·7–3·1%)            | 1·4% (1·1–1·7%)              | 1·7% (0·9–3·9%)             | 7% (2·6–17%)               |
| Türkiye                                   | Percent (proportion) ‡ | 0·3%                    | 0·3%                       | 2·8%                         | 10·0%                       | 86·6%                      |
|                                           | Number                 | 289 (211–383)           | 147 (119–186)              | 1004 (781–1314)              | 2630 (1496–5234)            | 22567 (8940–53999)         |
|                                           | Percent (all-cause)†   | 1·9% (1·5–2·3%)         | 6% (5–7·5%)                | 2·7% (2·4–3·4%)              | 2·2% (1·3–4·1%)             | 8·1% (3·2–18·5%)           |
| United Arab Emirates                      | Percent (proportion) ‡ | 1·1%                    | 0·6%                       | 3·8%                         | 9·9%                        | 84·7%                      |
|                                           | Number                 | 3 (1–5)                 | 5 (3–8)                    | 261 (171–387)                | 168 (99–282)                | 105 (50–233)               |
|                                           | Percent (all-cause)†   | 0·9% (0·5–1·6%)         | 3·2% (2·2–4·7%)            | 1·8% (1·4–2·3%)              | 1·4% (0·9–2·4%)             | 4·3% (2·9–6%)              |
| Yemen                                     | Percent (proportion) ‡ | 0·5%                    | 1·0%                       | 48·2%                        | 31·0%                       | 19·4%                      |
|                                           | Number                 | 93 (51–149)             | 79 (51–116)                | 253 (161–365)                | 355 (177–747)               | 1871 (696–4476)            |
|                                           | Percent (all-cause)†   | 0·2% (0·1–0·3%)         | 1·1% (0·8–1·5%)            | 0·6% (0·4–0·8%)              | 0·9% (0·5–1·9%)             | 4·2% (1·6–10·5%)           |
| Afghanistan                               | Percent (proportion) ‡ | 3·5%                    | 3·0%                       | 9·5%                         | 13·4%                       | 70·6%                      |
|                                           | Number                 | 250 (107–409)           | 148 (94–218)               | 592 (332–923)                | 415 (243–758)               | 2029 (822–4791)            |
|                                           | Percent (all-cause)†   | 0·3% (0·1–0·5%)         | 1·7% (1·1–2·3%)            | 1% (0·6–1·3%)                | 0·8% (0·5–1·5%)             | 4% (1·6–9·5%)              |
| Sudan                                     | Percent (proportion) ‡ | 7·3%                    | 4·3%                       | 17·2%                        | 12·1%                       | 59·1%                      |
|                                           | Number                 | 202 (102–324)           | 113 (71–171)               | 387 (235–576)                | 476 (250–979)               | 3178 (1243–7572)           |
|                                           | Percent (all-cause)†   | 0·4% (0·2–0·6%)         | 2·1% (1·4–2·8%)            | 1·1% (0·8–1·3%)              | 1·1% (0·6–2·2%)             | 4·8% (1·9–12·2%)           |
|                                           | Percent (proportion) ‡ | 4·6%                    | 2·6%                       | 8·9%                         | 10·9%                       | 73·0%                      |
| <b>YLDs (Years Lived with Disability)</b> |                        |                         |                            |                              |                             |                            |
| Global                                    | Number                 | 897162 (507192–1417198) | 5676483 (2176328–10836099) | 36903110 (10913039–75897789) | 12711970 (5985325–23080592) | 9437244 (6527828–12659309) |
|                                           | Percent (all-cause)†   | 3·4% (1·9–5·2%)         | 8·9% (3·5–16·1%)           | 9·2% (2·9–16·9%)             | 5·2% (2·5–8·8%)             | 7·3% (5·6–9·1%)            |
|                                           | Percent (proportion) ‡ | 1·4%                    | 8·6%                       | 56·2%                        | 19·4%                       | 14·4%                      |
| North Africa and Middle East              | Number                 | 98254 (52588–158711)    | 627614 (213610–1325464)    | 3528042 (1145394–7267261)    | 772764 (367676–1420787)     | 421173 (289935–572440)     |
|                                           | Percent (all-cause)†   | 4·2% (2·3–6·6%)         | 11·3% (3·9–20·8%)          | 9·9% (3·5–18%)               | 5·5% (2·7–9·3%)             | 7·9% (6·1–9·9%)            |
|                                           | Percent (proportion) ‡ | 1·8%                    | 11·5%                      | 64·8%                        | 14·2%                       | 7·7%                       |
| Algeria                                   | Number                 | 6791 (1584–14918)       | 38976 (12490–85802)        | 237462 (79432–488855)        | 58249 (27969–107137)        | 32769 (22463–44961)        |

**Table S30** Age-specific disability and death related to neurological disorders\* in North Africa and Middle East countries in 2019

|                      |                        | <b>Under 5</b>     | <b>5-14 years</b>     | <b>15-49 years</b>      | <b>50-69 years</b>    | <b>70+ years</b>      |
|----------------------|------------------------|--------------------|-----------------------|-------------------------|-----------------------|-----------------------|
|                      |                        | Mean (95% UI)      | Mean (95% UI)         | Mean (95% UI)           | Mean (95% UI)         | Mean (95% UI)         |
| Bahrain              | Percent (all-cause)†   | 4·7% (1·1–10%)     | 12·1% (4·4–22·7%)     | 10·3% (3·7–18·6%)       | 5·6% (2·8–9·7%)       | 7·7% (5·8–9·8%)       |
|                      | Percent (proportion) ‡ | 1·8%               | 10·4%                 | 63·5%                   | 15·6%                 | 8·8%                  |
|                      | Number                 | 119 (25–268)       | 931 (248–1976)        | 9353 (3171–18665)       | 2414 (1116–4393)      | 467 (321–644)         |
| Egypt                | Percent (all-cause)†   | 5·6% (1·2–12%)     | 12·8% (4·2–23·4%)     | 9·5% (3·6–16·8%)        | 5·2% (2·5–8·7%)       | 6·8% (4·9–8·6%)       |
|                      | Percent (proportion) ‡ | 0·9%               | 7·0%                  | 70·4%                   | 18·2%                 | 3·5%                  |
|                      | Number                 | 20287 (4286–41622) | 127933 (28718–279950) | 543325 (151925–1130844) | 113122 (51352–207345) | 47317 (32827–64894)   |
| Iran                 | Percent (all-cause)†   | 5·6% (1·3–11%)     | 12·5% (3·1–23·9%)     | 10·8% (3·3–20%)         | 5·3% (2·6–9·2%)       | 7% (5·3–9%)           |
|                      | Percent (proportion) ‡ | 2·4%               | 15·0%                 | 63·8%                   | 13·3%                 | 5·6%                  |
|                      | Number                 | 11983 (6342–20076) | 69172 (27020–137031)  | 533403 (173445–1093662) | 137671 (65337–249269) | 81085 (55888–110060)  |
| Iraq                 | Percent (all-cause)†   | 5·6% (3·1–8·9%)    | 11·6% (4·7–20·5%)     | 9·8% (3·5–17·8%)        | 5·8% (2·9–9·8%)       | 8·3% (6·3–10·4%)      |
|                      | Percent (proportion) ‡ | 1·4%               | 8·3%                  | 64·0%                   | 16·5%                 | 9·7%                  |
|                      | Number                 | 7341 (1626–15815)  | 48186 (14439–105392)  | 238623 (76600–502582)   | 40066 (18706–75057)   | 19398 (13268–26499)   |
| Jordan               | Percent (all-cause)†   | 4·3% (1·9–1%)      | 11% (3·3–20·9%)       | 9·6% (3·2–17·6%)        | 5·2% (2·4–8·8%)       | 7·3% (5·5–9·3%)       |
|                      | Percent (proportion) ‡ | 2·1%               | 13·6%                 | 67·5%                   | 11·3%                 | 5·5%                  |
|                      | Number                 | 1876 (418–4277)    | 13501 (3840–29110)    | 64806 (20180–135395)    | 12206 (5551–22914)    | 5248 (3569–7288)      |
| Kuwait               | Percent (all-cause)†   | 5% (1·2–11·2%)     | 12·3% (3·8–23·2%)     | 10·4% (3·4–19·2%)       | 5·7% (2·8–9·9%)       | 7·3% (5·4–9·3%)       |
|                      | Percent (proportion) ‡ | 1·9%               | 13·8%                 | 66·4%                   | 12·5%                 | 5·4%                  |
|                      | Number                 | 509 (115–1196)     | 3071 (875–6425)       | 30300 (9610–61765)      | 5091 (2362–9376)      | 2224 (1542–3009)      |
| Lebanon              | Percent (all-cause)†   | 6% (1·3–13%)       | 12·5% (3·9–22·6%)     | 9·6% (3·2–17·5%)        | 5·6% (2·6–9·5%)       | 8·8% (6·7–11%)        |
|                      | Percent (proportion) ‡ | 1·2%               | 7·5%                  | 73·6%                   | 12·4%                 | 5·4%                  |
|                      | Number                 | 763 (175–1718)     | 4548 (1219–9783)      | 28393 (8378–58331)      | 7788 (3619–14486)     | 7160 (4903–9632)      |
| Libya                | Percent (all-cause)†   | 5% (1·2–11·1%)     | 12·1% (3·7–23%)       | 9·7% (3·1–17·7%)        | 5·2% (2·5–9%)         | 7·8% (5·9–9·8%)       |
|                      | Percent (proportion) ‡ | 1·6%               | 9·3%                  | 58·4%                   | 16·0%                 | 14·7%                 |
|                      | Number                 | 544 (148–1131)     | 5537 (1494–12167)     | 42731 (13282–87754)     | 8725 (4083–16373)     | 5152 (3570–6986)      |
| Morocco              | Percent (all-cause)†   | 3·8% (1·7–9%)      | 11% (3·4–21·2%)       | 9·3% (3·1–17·1%)        | 5·2% (2·5–9%)         | 7·8% (6·9–8%)         |
|                      | Percent (proportion) ‡ | 0·9%               | 8·8%                  | 68·2%                   | 13·9%                 | 8·2%                  |
|                      | Number                 | 5247 (968–12047)   | 34797 (8977–73861)    | 201956 (60428–421315)   | 56416 (25156–103793)  | 28760 (19770–39410)   |
| Palestine            | Percent (all-cause)†   | 4·7% (1–10·7%)     | 11·6% (3·4–22·3%)     | 9·8% (3·3–17·9%)        | 5·3% (2·6–9·1%)       | 7·7% (5·9–9·8%)       |
|                      | Percent (proportion) ‡ | 1·6%               | 10·6%                 | 61·7%                   | 17·2%                 | 8·8%                  |
|                      | Number                 | 876 (204–1908)     | 6382 (1816–13676)     | 26280 (8182–54305)      | 4403 (2007–8236)      | 1947 (1346–2638)      |
| Oman                 | Percent (all-cause)†   | 4·7% (1·1–9·8%)    | 11·1% (3·3–21·5%)     | 9·4% (3·2–16·9%)        | 5% (2·4–8·7%)         | 7·2% (5·5–9·3%)       |
|                      | Percent (proportion) ‡ | 2·2%               | 16·0%                 | 65·9%                   | 11·0%                 | 4·9%                  |
|                      | Number                 | 654 (153–1481)     | 3235 (900–7016)       | 29872 (9262–60799)      | 3377 (1562–6281)      | 1002 (687–1373)       |
| Qatar                | Percent (all-cause)†   | 4·5% (1·1–9·6%)    | 11·3% (3·4–21·2%)     | 10% (3·4–18·1%)         | 5·4% (2·5–9·4%)       | 6·7% (4·9–8·6%)       |
|                      | Percent (proportion) ‡ | 1·7%               | 8·5%                  | 78·3%                   | 8·9%                  | 2·6%                  |
|                      | Number                 | 242 (57–547)       | 1404 (403–2951)       | 20096 (7233–40174)      | 2407 (1152–4383)      | 243 (165–345)         |
| Saudi Arabia         | Percent (all-cause)†   | 6·2% (1·5–13·5%)   | 12·9% (4·2–24%)       | 9·6% (3·5–17·1%)        | 4·8% (2·4–8·2%)       | 5·6% (4·1–7·3%)       |
|                      | Percent (proportion) ‡ | 1·0%               | 5·8%                  | 82·4%                   | 9·9%                  | 1·0%                  |
|                      | Number                 | 4206 (981–9334)    | 27661 (7954–58866)    | 259167 (89184–518013)   | 37282 (17225–66624)   | 9973 (6875–13511)     |
| Syrian Arab Republic | Percent (all-cause)†   | 6·4% (1·5–13·6%)   | 13·9% (4·7–25·1%)     | 10% (3·7–17·6%)         | 5·4% (2·6–9·1%)       | 7% (5·2–8·9%)         |
|                      | Percent (proportion) ‡ | 1·2%               | 8·2%                  | 76·6%                   | 11·0%                 | 2·9%                  |
|                      | Number                 | 1828 (381–3954)    | 16249 (4344–35656)    | 77336 (22926–164137)    | 23010 (10419–43772)   | 10092 (6879–13902)    |
| Tunisia              | Percent (all-cause)†   | 4·2% (0·9–8·7%)    | 9·6% (2·9–18·8%)      | 9·3% (3·1–17·4%)        | 5·3% (2·6–9·2%)       | 6·9% (5·1–8·9%)       |
|                      | Percent (proportion) ‡ | 1·4%               | 12·6%                 | 60·2%                   | 17·9%                 | 7·9%                  |
|                      | Number                 | 1150 (256–2612)    | 9013 (2451–19575)     | 63533 (18985–131020)    | 21249 (9827–38768)    | 14354 (9834–19662)    |
| Türkiye              | Percent (all-cause)†   | 4·5% (1·1–9·7%)    | 12·2% (3·7–23·6%)     | 10% (3·3–18·5%)         | 5·5% (2·7–9·4%)       | 8% (6·2–10·2%)        |
|                      | Percent (proportion) ‡ | 1·1%               | 8·2%                  | 58·1%                   | 19·4%                 | 13·1%                 |
|                      | Number                 | 10007 (2305–21500) | 63832 (19219–129618)  | 488015 (167307–978985)  | 155339 (75164–280693) | 116618 (80270–157814) |
|                      | Percent (all-cause)†   | 6·3% (1·6–12·8%)   | 12·9% (4·4–23·1%)     | 10·2% (3·8–18·4%)       | 6% (3·1–10%)          | 8·9% (6·8–11·1%)      |

**Table S30** Age-specific disability and death related to neurological disorders\* in North Africa and Middle East countries in 2019

|                                  |                        | <b>Under 5</b>           | <b>5-14 years</b>      | <b>15-49 years</b>        | <b>50-69 years</b>         | <b>70+ years</b>            |
|----------------------------------|------------------------|--------------------------|------------------------|---------------------------|----------------------------|-----------------------------|
|                                  |                        | Mean (95% UI)            | Mean (95% UI)          | Mean (95% UI)             | Mean (95% UI)              | Mean (95% UI)               |
| United Arab Emirates             | Percent (proportion) ‡ | 1.2%                     | 7.7%                   | 58.5%                     | 18.6%                      | 14.0%                       |
|                                  | Number                 | 683 (166–1457)           | 4953 (1566–10173)      | 68623 (25375–134195)      | 9727 (4536–17548)          | 702 (472–981)               |
|                                  | Percent (all-cause)†   | 6.3% (1.6–12.8%)         | 13.4% (4.6–24.5%)      | 9.2% (3.7–15.9%)          | 5.4% (2.7–9.1%)            | 6.2% (4.6–8%)               |
| Yemen                            | Percent (proportion) ‡ | 0.8%                     | 5.8%                   | 81.0%                     | 11.5%                      | 0.8%                        |
|                                  | Number                 | 5572 (1114–12442)        | 42150 (10431–92266)    | 158700 (45646–334550)     | 21523 (9449–40556)         | 10495 (7133–14448)          |
| Afghanistan                      | Percent (all-cause)†   | 1.6% (0.4–3.5%)          | 8.8% (2.5–17.1%)       | 9% (2.8–16.9%)            | 5.2% (2.4–9.1%)            | 7% (5.2–9.1%)               |
|                                  | Percent (proportion) ‡ | 2.3%                     | 17.7%                  | 66.6%                     | 9.0%                       | 4.4%                        |
|                                  | Number                 | 9441 (1508–22089)        | 52844 (13413–116665)   | 186796 (56870–388048)     | 21453 (9516–39921)         | 9013 (6288–12454)           |
| Sudan                            | Percent (all-cause)†   | 3.2% (0.5–6.8%)          | 8.7% (2.5–17.1%)       | 8.5% (2.8–15.8%)          | 4.4% (1.9–7.8%)            | 5.9% (4.4–7.6%)             |
|                                  | Percent (proportion) ‡ | 3.4%                     | 18.9%                  | 66.8%                     | 7.7%                       | 3.2%                        |
|                                  | Number                 | 8035 (1742–18275)        | 52602 (14834–114051)   | 215688 (65398–454954)     | 30457 (13458–57051)        | 16726 (11688–22584)         |
|                                  | Percent (all-cause)†   | 2.9% (0.7–6.3%)          | 10.2% (3.3–19.6%)      | 10.2% (3.4–18.9%)         | 5.4% (2.6–9.4%)            | 7.4% (5.7–9.4%)             |
|                                  | Percent (proportion) ‡ | 2.5%                     | 16.3%                  | 66.7%                     | 9.4%                       | 5.2%                        |
| <b>YLLs (Years of Life Lost)</b> |                        |                          |                        |                           |                            |                             |
| Global                           | Number                 | 1096003 (892503–1374123) | 821392 (699266–959507) | 4529855 (4092401–5150052) | 5969002 (3716070–11532629) | 19682190 (8667426–43987093) |
|                                  | Percent (all-cause)†   | 0.2% (0.2–0.3%)          | 1.5% (1.3–1.7%)        | 1.2% (1.1–1.3%)           | 1.4% (0.9–2.7%)            | 5.5% (2.4–12.7%)            |
|                                  | Percent (proportion) ‡ | 3.4%                     | 2.6%                   | 14.1%                     | 18.6%                      | 61.3%                       |
| North Africa and Middle East     | Number                 | 103955 (70312–134872)    | 74310 (57217–99189)    | 325706 (272857–387977)    | 337318 (198537–671831)     | 866904 (369779–1991684)     |
|                                  | Percent (all-cause)†   | 0.4% (0.3–0.5%)          | 1.9% (1.5–2.6%)        | 1.2% (1.1–1.4%)           | 1.3% (0.8–2.5%)            | 5% (2.1–12%)                |
|                                  | Percent (proportion) ‡ | 6.1%                     | 4.4%                   | 19.1%                     | 19.7%                      | 50.7%                       |
| Algeria                          | Number                 | 5321 (3216–7577)         | 4246 (3231–5666)       | 20325 (15719–26027)       | 23367 (11422–51607)        | 67272 (26830–162430)        |
|                                  | Percent (all-cause)†   | 0.3% (0.2–0.5%)          | 2.1% (1.6–2.8%)        | 1.4% (1.2–1.6%)           | 1.6% (0.8–3.6%)            | 5.2% (2.1–12.9%)            |
|                                  | Percent (proportion) ‡ | 4.4%                     | 3.5%                   | 16.9%                     | 19.4%                      | 55.8%                       |
| Bahrain                          | Number                 | 99 (72–135)              | 91 (72–127)            | 838 (656–1091)            | 853 (442–1794)             | 928 (408–2070)              |
|                                  | Percent (all-cause)†   | 1.3% (1–1.6%)            | 3.5% (2.8–4.8%)        | 1.9% (1.7–2.4%)           | 1.7% (1.3–5%)              | 4.2% (1.9–9.9%)             |
|                                  | Percent (proportion) ‡ | 3.5%                     | 3.2%                   | 29.8%                     | 30.4%                      | 33.0%                       |
| Egypt                            | Number                 | 6666 (4309–9976)         | 10131 (4457–32592)     | 32253 (23187–43963)       | 54573 (30567–105807)       | 94880 (40934–211016)        |
|                                  | Percent (all-cause)†   | 0.2% (0.2–0.3%)          | 1.5% (0.7–4.7%)        | 0.8% (0.6–1%)             | 0.8% (0.5–1.6%)            | 3.1% (1.4–7%)               |
|                                  | Percent (proportion) ‡ | 3.4%                     | 5.1%                   | 16.2%                     | 27.5%                      | 47.8%                       |
| Iran                             | Number                 | 5779 (3592–7931)         | 6861 (6070–7926)       | 41834 (37406–50407)       | 52777 (29319–107139)       | 162893 (65683–383025)       |
|                                  | Percent (all-cause)†   | 0.4% (0.3–0.6%)          | 2% (1.8–2.3%)          | 1.3% (1.2–1.6%)           | 1.8% (1.3–6%)              | 6.4% (2.5–15.1%)            |
|                                  | Percent (proportion) ‡ | 2.1%                     | 2.5%                   | 15.5%                     | 19.5%                      | 60.3%                       |
| Iraq                             | Number                 | 4805 (2985–7310)         | 5155 (4170–6411)       | 18390 (13201–25581)       | 15400 (7516–33818)         | 40399 (16555–90335)         |
|                                  | Percent (all-cause)†   | 0.4% (0.3–0.5%)          | 1.8% (1.5–2.1%)        | 0.9% (0.8–1.1%)           | 0.9% (0.5–2%)              | 4.4% (1.8–10.6%)            |
|                                  | Percent (proportion) ‡ | 5.7%                     | 6.1%                   | 21.9%                     | 18.3%                      | 48.0%                       |
| Jordan                           | Number                 | 1255 (858–1778)          | 946 (758–1164)         | 4209 (3274–5192)          | 4200 (2159–8944)           | 9833 (4058–22753)           |
|                                  | Percent (all-cause)†   | 0.4% (0.3–0.5%)          | 1.7% (1.4–2%)          | 1.6% (1.3–1.9%)           | 1.5% (0.8–3.3%)            | 5.3% (2.2–12.5%)            |
|                                  | Percent (proportion) ‡ | 6.1%                     | 4.6%                   | 20.6%                     | 20.5%                      | 48.1%                       |
| Kuwait                           | Number                 | 350 (259–463)            | 334 (270–413)          | 1561 (1260–2040)          | 1509 (708–3418)            | 4322 (1580–10027)           |
|                                  | Percent (all-cause)†   | 0.7% (0.6–0.9%)          | 3.7% (3.1–4.4%)        | 1.5% (1.3–1.9%)           | 1.8% (0.9–4.1%)            | 8.2% (3–19.6%)              |
|                                  | Percent (proportion) ‡ | 4.3%                     | 4.1%                   | 19.3%                     | 18.7%                      | 53.5%                       |
| Lebanon                          | Number                 | 372 (187–607)            | 308 (207–459)          | 2431 (1755–3225)          | 3135 (1595–6734)           | 14865 (5611–36246)          |
|                                  | Percent (all-cause)†   | 0.4% (0.2–0.6%)          | 2.4% (1.6–3.4%)        | 1.4% (1.2–1.8%)           | 1.4% (0.7–2.9%)            | 5.5% (2.1–13%)              |
|                                  | Percent (proportion) ‡ | 1.8%                     | 1.5%                   | 11.5%                     | 14.8%                      | 70.4%                       |
| Libya                            | Number                 | 564 (319–855)            | 441 (312–643)          | 4589 (3424–6044)          | 4106 (2183–8142)           | 12201 (4712–28410)          |
|                                  | Percent (all-cause)†   | 0.6% (0.4–0.8%)          | 1.5% (1.1–2.2%)        | 1.2% (1–1.4%)             | 1.5% (0.9–3%)              | 7.1% (2.8–16.4%)            |
|                                  | Percent (proportion) ‡ | 2.6%                     | 2.0%                   | 21.0%                     | 18.7%                      | 55.7%                       |

**Table S30** Age-specific disability and death related to neurological disorders\* in North Africa and Middle East countries in 2019

|                      |                       | <b>Under 5</b>      | <b>5-14 years</b>  | <b>15-49 years</b>  | <b>50-69 years</b>   | <b>70+ years</b>      |
|----------------------|-----------------------|---------------------|--------------------|---------------------|----------------------|-----------------------|
|                      |                       | Mean (95% UI)       | Mean (95% UI)      | Mean (95% UI)       | Mean (95% UI)        | Mean (95% UI)         |
| Morocco              | Number                | 1804 (883–3420)     | 2437 (1122–4942)   | 15203 (7841–30613)  | 26579 (13640–54144)  | 62607 (26495–144369)  |
|                      | Percent (all-cause)†  | 0.2% (0.1–0.3%)     | 1.6% (0.8–3.3%)    | 1.1% (0.6–2%)       | 1.2% (0.6–2.3%)      | 4.4% (1.9–10.4%)      |
|                      | Percent (proportion)‡ | 1.7%                | 2.2%               | 14.0%               | 24.5%                | 57.6%                 |
| Palestine            | Number                | 815 (559–1209)      | 693 (544–953)      | 2896 (2448–3418)    | 1833 (1059–3712)     | 4197 (1832–10193)     |
|                      | Percent (all-cause)†  | 0.6% (0.5–0.8%)     | 2.8% (2.3–3.8%)    | 2.4% (2.2–2.7%)     | 1.3% (0.7–2.5%)      | 4.2% (1.8–10.1%)      |
|                      | Percent (proportion)‡ | 7.8%                | 6.6%               | 27.8%               | 17.6%                | 40.2%                 |
| Oman                 | Number                | 192 (140–260)       | 164 (125–227)      | 1226 (985–1546)     | 1156 (560–2522)      | 2310 (1081–5175)      |
|                      | Percent (all-cause)†  | 0.3% (0.2–0.3%)     | 1.1% (0.8–1.4%)    | 0.6% (0.5–0.8%)     | 1.1% (0.6–2.5%)      | 3.7% (1.7–8.4%)       |
|                      | Percent (proportion)‡ | 3.8%                | 3.3%               | 24.3%               | 22.9%                | 45.8%                 |
| Qatar                | Number                | 156 (106–217)       | 107 (86–134)       | 913 (673–1297)      | 750 (342–1645)       | 517 (242–1111)        |
|                      | Percent (all-cause)†  | 0.8% (0.6–1.1%)     | 2.3% (1.9–2.8%)    | 1% (0.8–1.3%)       | 1.7% (0.8–3.6%)      | 3.6% (1.8–7.8%)       |
|                      | Percent (proportion)‡ | 6.4%                | 4.4%               | 37.4%               | 30.7%                | 21.2%                 |
| Saudi Arabia         | Number                | 1224 (732–2018)     | 1366 (1007–1846)   | 32805 (23503–46496) | 15517 (8990–29845)   | 21250 (9596–46679)    |
|                      | Percent (all-cause)†  | 0.5% (0.3–0.8%)     | 2.3% (1.8–3%)      | 1.3% (1–1.6%)       | 1.1% (0.7–2.1%)      | 5.2% (2.4–11.7%)      |
|                      | Percent (proportion)‡ | 1.7%                | 1.9%               | 45.5%               | 21.5%                | 29.4%                 |
| Syrian Arab Republic | Number                | 916 (608–1330)      | 1077 (854–1494)    | 4797 (3395–6653)    | 8713 (3977–19347)    | 21238 (8468–51143)    |
|                      | Percent (all-cause)†  | 0.3% (0.2–0.4%)     | 1% (0.8–1.4%)      | 0.9% (0.7–1.1%)     | 1% (0.5–2.1%)        | 4% (1.7–9.4%)         |
|                      | Percent (proportion)‡ | 2.5%                | 2.9%               | 13.1%               | 23.7%                | 57.8%                 |
| Tunisia              | Number                | 806 (453–1185)      | 801 (555–1120)     | 4761 (3243–6603)    | 8829 (4095–20236)    | 29877 (11369–70479)   |
|                      | Percent (all-cause)†  | 0.5% (0.3–0.7%)     | 2.3% (1.7–3.1%)    | 1.4% (1.1–1.7%)     | 1.7% (0.8–3.7%)      | 6% (2.3–14.4%)        |
|                      | Percent (proportion)‡ | 1.8%                | 1.8%               | 10.6%               | 19.6%                | 66.3%                 |
| Türkiye              | Number                | 25089 (18322–33290) | 11664 (9436–14703) | 54122 (42268–70543) | 72853 (42506–142364) | 234453 (98071–561356) |
|                      | Percent (all-cause)†  | 1.9% (1.5–2.3%)     | 6% (5–7.5%)        | 2.9% (2.6–3.6%)     | 2.1% (1.3–3.9%)      | 6.8% (2.8–15.8%)      |
|                      | Percent (proportion)‡ | 6.3%                | 2.9%               | 13.6%               | 18.3%                | 58.9%                 |
| United Arab Emirates | Number                | 221 (118–416)       | 404 (272–618)      | 13053 (8643–19457)  | 5170 (3071–8507)     | 1408 (691–3038)       |
|                      | Percent (all-cause)†  | 0.9% (0.5–1.5%)     | 3.2% (2.2–4.7%)    | 1.8% (1.4–2.4%)     | 1.4% (0.9–2.3%)      | 3.8% (1.9–8.2%)       |
|                      | Percent (proportion)‡ | 1.1%                | 2.0%               | 64.4%               | 25.5%                | 7.0%                  |
| Yemen                | Number                | 8096 (4386–12932)   | 6256 (4028–9216)   | 13915 (8664–19962)  | 9906 (5091–20316)    | 21744 (8687–52584)    |
|                      | Percent (all-cause)†  | 0.2% (0.1–0.3%)     | 1.1% (0.8–1.5%)    | 0.6% (0.4–0.8%)     | 0.9% (0.5–1.8%)      | 3.5% (1.4–8.7%)       |
|                      | Percent (proportion)‡ | 13.5%               | 10.4%              | 23.2%               | 16.5%                | 36.3%                 |
| Afghanistan          | Number                | 21808 (9280–35565)  | 11766 (7428–17416) | 33204 (18250–51570) | 12333 (7374–21998)   | 24022 (10291–54929)   |
|                      | Percent (all-cause)†  | 0.3% (0.1–0.5%)     | 1.7% (1.1–2.3%)    | 1% (0.6–1.3%)       | 0.8% (0.5–1.4%)      | 3.3% (1.4–7.9%)       |
|                      | Percent (proportion)‡ | 21.1%               | 11.4%              | 32.2%               | 12.0%                | 23.3%                 |
| Sudan                | Number                | 17511 (8883–28037)  | 8985 (5590–13596)  | 22050 (13383–32970) | 13415 (7179–27169)   | 34807 (14398–83419)   |
|                      | Percent (all-cause)†  | 0.4% (0.2–0.6%)     | 2.1% (1.4–2.8%)    | 1.1% (0.8–1.4%)     | 1% (0.6–2%)          | 4% (1.7–9.6%)         |
|                      | Percent (proportion)‡ | 18.1%               | 9.3%               | 22.8%               | 13.9%                | 36.0%                 |

DALYs, Disability-Adjusted Life Years; UI, uncertainty interval; YLDs, Years Lived with Disability; YLLs, Years of Life Lost. Count data are absolute numbers and percentage data are rounded to one decimal place. Percentages and number of DALYs, deaths, YLDs, and YLLs are not mutually exclusive: the sum of percentages and number of DALYs, deaths, YLDs, and YLLs in the columns exceeds the totals for all causes combined because of overlap between various causes. Measures with insufficient data are not reported here. \*Neurological disorders in this table include stroke, encephalitis, meningitis, tetanus, brain and central nervous system cancer, Alzheimer's disease and other dementias, Parkinson's disease, idiopathic epilepsy, multiple sclerosis, headache disorders (including migraine and tension-type headache), motor neuron disease, and other neurological disorders. †Percent of all-cause indicates the proportion of the specified measure (ie, DALYs, deaths, YDLs, or YLLs) of neurological disorders out of all causes in the age-group in the region/nation. ‡ Percent proportion indicates the share of the specified measure (ie, DALYs, deaths, YDLs, or YLLs) of neurological disorders in different age-groups in the region/nation. Data in parentheses are 95% uncertainty intervals.

***Table S31 Age- and sex-specific disability, prevalent cases, and new cases of head and spinal injuries in North Africa and Middle East countries in 2019***  
(NEXT PAGE)



**Table S31** Age- and sex-specific disability, prevalent cases, and new cases of head and spinal injuries in North Africa and Middle East countries in 2019

|                                           | Age       | Head Injuries                |                              |                              | Spinal Injuries              |                              |                              |
|-------------------------------------------|-----------|------------------------------|------------------------------|------------------------------|------------------------------|------------------------------|------------------------------|
|                                           |           | Both sexes                   | Female                       | Male                         | Both sexes                   | Female                       | Male                         |
| <b>YLDs (Years Lived with Disability)</b> |           |                              |                              |                              |                              |                              |                              |
| Global                                    | <70 years | 5843015 (4128883 to 7902436) | 2032503 (1434073 to 2740375) | 3810512 (2701858 to 5173980) | 5419258 (3870006 to 7241016) | 2209474 (1573836 to 3059171) | 3209784 (2282707 to 4215563) |
|                                           | 70+ years | 1233888 (882797 to 1650438)  | 660790 (470961 to 887912)    | 573098 (412154 to 760888)    | 781551 (565913 to 1009407)   | 465387 (336197 to 603985)    | 316164 (229335 to 405345)    |
| North Africa and Middle East              | <70 years | 415584 (303805 to 555076)    | 128920 (93528 to 172295)     | 286664 (209305 to 382719)    | 545901 (278350 to 1195167)   | 210152 (99568 to 532583)     | 335749 (177102 to 667242)    |
|                                           | 70+ years | 37450 (27657 to 48972)       | 16451 (12114 to 21720)       | 20998 (15623 to 27407)       | 18288 (11106 to 32702)       | 8612 (5185 to 16319)         | 9677 (5903 to 17169)         |
| Algeria                                   | <70 years | 26978 (19299 to 36281)       | 9429 (6631 to 12769)         | 17549 (12481 to 23540)       | 20489 (13393 to 31648)       | 8005 (5230 to 12990)         | 12484 (8069 to 18701)        |
|                                           | 70+ years | 2958 (2124 to 3946)          | 1209 (857 to 1611)           | 1750 (1253 to 2327)          | 1054 (760 to 1378)           | 460 (324 to 625)             | 594 (415 to 788)             |
| Bahrain                                   | <70 years | 1205 (846 to 1658)           | 266 (186 to 359)             | 939 (657 to 1297)            | 704 (491 to 924)             | 185 (130 to 251)             | 519 (357 to 684)             |
|                                           | 70+ years | 34 (24 to 45)                | 13 (9 to 17)                 | 21 (15 to 28)                | 12 (8 to 16)                 | 5 (3 to 7)                   | 7 (5 to 10)                  |
| Egypt                                     | <70 years | 47011 (32951 to 64181)       | 16684 (11588 to 22894)       | 30327 (21482 to 41034)       | 28071 (19797 to 36459)       | 11557 (8031 to 15078)        | 16514 (11745 to 21787)       |
|                                           | 70+ years | 3330 (2362 to 4444)          | 1286 (882 to 1730)           | 2045 (1460 to 2731)          | 901 (618 to 1193)            | 395 (258 to 549)             | 505 (336 to 702)             |
| Iran (Islamic Republic of)                | <70 years | 62946 (46891 to 83514)       | 20026 (14826 to 26520)       | 42920 (31933 to 57375)       | 55885 (34860 to 92605)       | 21075 (12778 to 37206)       | 34810 (22011 to 56046)       |
|                                           | 70+ years | 7246 (5372 to 9515)          | 2975 (2198 to 3920)          | 4270 (3157 to 5596)          | 3040 (2041 to 4459)          | 1382 (934 to 2079)           | 1658 (1138 to 2376)          |
| Iraq                                      | <70 years | 35280 (25300 to 48266)       | 10962 (7724 to 15280)        | 24318 (17289 to 33059)       | 104664 (34298 to 291336)     | 41046 (11332 to 128191)      | 63617 (21804 to 154600)      |
|                                           | 70+ years | 2030 (1473 to 2744)          | 813 (576 to 1108)            | 1217 (885 to 1652)           | 1756 (659 to 4610)           | 805 (288 to 2502)            | 950 (368 to 2364)            |
| Jordan                                    | <70 years | 5492 (3821 to 7479)          | 1756 (1211 to 2401)          | 3736 (2587 to 5099)          | 3539 (2465 to 4648)          | 1310 (884 to 1814)           | 2230 (1528 to 2947)          |
|                                           | 70+ years | 392 (278 to 521)             | 157 (109 to 213)             | 235 (168 to 314)             | 139 (100 to 185)             | 62 (43 to 83)                | 77 (52 to 105)               |
| Kuwait                                    | <70 years | 3508 (2484 to 4737)          | 983 (694 to 1326)            | 2525 (1779 to 3425)          | 2576 (1671 to 4095)          | 916 (554 to 1610)            | 1661 (1092 to 2504)          |
|                                           | 70+ years | 202 (147 to 267)             | 53 (39 to 72)                | 149 (108 to 198)             | 79 (53 to 116)               | 26 (16 to 41)                | 53 (35 to 76)                |
| Lebanon                                   | <70 years | 3501 (2468 to 4857)          | 1274 (899 to 1784)           | 2227 (1587 to 3094)          | 6850 (2267 to 19463)         | 3228 (931 to 10788)          | 3622 (1304 to 9618)          |
|                                           | 70+ years | 525 (377 to 730)             | 244 (175 to 332)             | 281 (203 to 396)             | 377 (151 to 1122)            | 174 (73 to 524)              | 203 (73 to 592)              |
| Libya                                     | <70 years | 5841 (4259 to 7883)          | 1755 (1259 to 2368)          | 4086 (2975 to 5482)          | 7177 (3674 to 15425)         | 2413 (1182 to 5820)          | 4764 (2434 to 9572)          |
|                                           | 70+ years | 480 (352 to 636)             | 190 (138 to 252)             | 290 (213 to 386)             | 189 (126 to 306)             | 79 (51 to 135)               | 110 (71 to 172)              |
| Morocco                                   | <70 years | 23988 (16863 to 32476)       | 8131 (5756 to 11030)         | 15857 (11092 to 21545)       | 14971 (10806 to 19243)       | 6256 (4559 to 8196)          | 8715 (6128 to 11370)         |
|                                           | 70+ years | 2526 (1805 to 3374)          | 1149 (800 to 1542)           | 1378 (984 to 1867)           | 849 (606 to 1102)            | 434 (297 to 591)             | 415 (292 to 554)             |
| Palestine                                 | <70 years | 3553 (2513 to 4922)          | 1136 (776 to 1592)           | 2416 (1719 to 3358)          | 13154 (4180 to 36709)        | 5273 (1407 to 16825)         | 7881 (2685 to 18928)         |
|                                           | 70+ years | 176 (130 to 230)             | 80 (58 to 106)               | 96 (71 to 127)               | 167 (69 to 419)              | 70 (30 to 191)               | 97 (38 to 231)               |
| Oman                                      | <70 years | 4117 (2844 to 5638)          | 816 (563 to 1119)            | 3301 (2278 to 4532)          | 2081 (1453 to 2727)          | 463 (321 to 623)             | 1618 (1110 to 2151)          |
|                                           | 70+ years | 129 (93 to 173)              | 52 (37 to 72)                | 77 (55 to 103)               | 35 (24 to 46)                | 15 (10 to 21)                | 20 (13 to 27)                |
| Qatar                                     | <70 years | 2822 (1970 to 3864)          | 375 (262 to 512)             | 2446 (1707 to 3344)          | 1514 (1064 to 2010)          | 242 (166 to 324)             | 1272 (891 to 1703)           |
|                                           | 70+ years | 35 (25 to 46)                | 6 (4 to 8)                   | 29 (21 to 38)                | 11 (8 to 15)                 | 2 (1 to 3)                   | 9 (6 to 12)                  |
| Saudi Arabia                              | <70 years | 53147 (37200 to 72733)       | 10967 (7635 to 15053)        | 42180 (29532 to 57996)       | 27507 (19554 to 36172)       | 6409 (4450 to 8475)          | 21097 (14966 to 27697)       |
|                                           | 70+ years | 1928 (1373 to 2581)          | 585 (414 to 784)             | 1343 (957 to 1781)           | 520 (371 to 695)             | 178 (127 to 237)             | 343 (238 to 467)             |
| Syrian Arab Republic                      | <70 years | 14117 (9400 to 20611)        | 5067 (3348 to 7410)          | 9050 (6006 to 13577)         | 54288 (15623 to 152168)      | 21219 (5308 to 66277)        | 33069 (9685 to 84425)        |

**Table S31** Age- and sex-specific disability, prevalent cases, and new cases of head and spinal injuries in North Africa and Middle East countries in 2019

|                              | Head Injuries     |                                 |                                 |                                 | Spinal Injuries                 |                              |                                |
|------------------------------|-------------------|---------------------------------|---------------------------------|---------------------------------|---------------------------------|------------------------------|--------------------------------|
|                              | Age               | Both sexes                      | Female                          | Male                            | Both sexes                      | Female                       | Male                           |
| Tunisia                      | 70+ years         | 1647 (986 to 2655)              | 649 (391 to 1032)               | 999 (604 to 1639)               | 2377 (593 to 7015)              | 1047 (245 to 3431)           | 1330 (351 to 3597)             |
|                              | <70 years         | 8165 (5690 to 11117)            | 2816 (1981 to 3824)             | 5350 (3753 to 7295)             | 4347 (3131 to 5667)             | 1740 (1204 to 2328)          | 2607 (1839 to 3443)            |
| Türkiye                      | 70+ years         | 1215 (870 to 1635)              | 552 (392 to 746)                | 663 (477 to 885)                | 371 (267 to 482)                | 186 (131 to 246)             | 185 (126 to 249)               |
|                              | <70 years         | 53325 (38292 to 72034)          | 18798 (13425 to 25224)          | 34527 (24768 to 46844)          | 37027 (25060 to 53037)          | 14763 (9777 to 21414)        | 22264 (14925 to 31988)         |
| United Arab Emirates         | 70+ years         | 9517 (6861 to 12825)            | 5280 (3747 to 7164)             | 4237 (3034 to 5649)             | 3136 (2211 to 4193)             | 1870 (1322 to 2510)          | 1265 (865 to 1723)             |
|                              | <70 years         | 9903 (6907 to 13572)            | 1398 (978 to 1905)              | 8505 (5925 to 11641)            | 5443 (3813 to 7057)             | 942 (651 to 1240)            | 4501 (3170 to 5919)            |
| Yemen                        | 70+ years         | 73 (53 to 97)                   | 22 (15 to 29)                   | 52 (37 to 69)                   | 20 (14 to 27)                   | 7 (4 to 9)                   | 14 (9 to 19)                   |
|                              | <70 years         | 16066 (11360 to 22024)          | 5372 (3745 to 7326)             | 10694 (7583 to 14689)           | 26534 (11705 to 63852)          | 10494 (4243 to 28396)        | 16040 (7216 to 34857)          |
| Afghanistan                  | 70+ years         | 1022 (733 to 1368)              | 427 (297 to 578)                | 595 (429 to 807)                | 938 (347 to 2471)               | 453 (145 to 1337)            | 485 (192 to 1172)              |
|                              | <70 years         | 24294 (15770 to 38844)          | 7649 (4716 to 12900)            | 16646 (11060 to 25822)          | 97600 (25998 to 284386)         | 39450 (8351 to 131770)       | 58150 (17240 to 153986)        |
| Sudan                        | 70+ years         | 1117 (646 to 1954)              | 395 (224 to 683)                | 722 (421 to 1287)               | 1289 (337 to 3964)              | 541 (132 to 1740)            | 748 (205 to 2240)              |
|                              | <70 years         | 9904 (7134 to 13321)            | 3129 (2218 to 4193)             | 6775 (4898 to 9230)             | 30926 (19734 to 54260)          | 12952 (7907 to 25041)        | 17974 (11669 to 28866)         |
| 70+ years                    | 830 (610 to 1097) | 301 (217 to 404)                | 529 (385 to 706)                | 1012 (732 to 1373)              | 412 (292 to 574)                | 600 (427 to 812)             |                                |
| <b>Prevalent cases</b>       |                   |                                 |                                 |                                 |                                 |                              |                                |
| Global                       | <70 years         | 39776878 (37915052 to 41958172) | 14006164 (13353394 to 14770448) | 25770714 (24498467 to 27246856) | 17512507 (15942692 to 20511484) | 7300793 (6600951 to 8750342) | 10211715 (9291628 to 11729277) |
|                              | 70+ years         | 9211049 (8666380 to 9717634)    | 4941512 (4612611 to 5257343)    | 4269537 (4043382 to 4477017)    | 3122530 (2744381 to 3550621)    | 1879091 (1638092 to 2152582) | 1243439 (1099255 to 1402217)   |
| North Africa and Middle East | <70 years         | 2819605 (2583544 to 3177403)    | 887582 (810540 to 1010466)      | 1932023 (1769938 to 2176309)    | 1533674 (942862 to 3082991)     | 594909 (341382 to 1345814)   | 938765 (598225 to 1652615)     |
|                              | 70+ years         | 277277 (254119 to 308674)       | 121741 (111012 to 135161)       | 155536 (142705 to 173188)       | 64066 (48408 to 103915)         | 30664 (23023 to 50667)       | 33401 (25016 to 52212)         |
| Algeria                      | <70 years         | 181008 (171634 to 191736)       | 64073 (60453 to 68091)          | 116935 (110835 to 124238)       | 63821 (52429 to 90638)          | 25655 (20887 to 37699)       | 38167 (31204 to 52167)         |
|                              | 70+ years         | 21598 (20522 to 22609)          | 8853 (8336 to 9348)             | 12744 (12162 to 13303)          | 3951 (3582 to 4433)             | 1751 (1581 to 1980)          | 2200 (1992 to 2475)            |
| Bahrain                      | <70 years         | 8080 (7665 to 8555)             | 1812 (1702 to 1929)             | 6267 (5918 to 6658)             | 2415 (2241 to 2627)             | 656 (601 to 721)             | 1759 (1626 to 1908)            |
|                              | 70+ years         | 252 (241 to 264)                | 95 (90 to 101)                  | 157 (150 to 163)                | 49 (45 to 53)                   | 20 (18 to 22)                | 28 (26 to 31)                  |
| Egypt                        | <70 years         | 313279 (298586 to 329318)       | 112829 (107038 to 118963)       | 200450 (191146 to 211054)       | 88414 (82039 to 96943)          | 37325 (34197 to 41071)       | 51089 (47265 to 55723)         |
|                              | 70+ years         | 24292 (22971 to 25618)          | 9402 (8706 to 10046)            | 14890 (14089 to 15593)          | 3310 (3037 to 3616)             | 1464 (1324 to 1618)          | 1846 (1687 to 2015)            |
| Iran (Islamic Republic of)   | <70 years         | 425367 (394239 to 463865)       | 137062 (126283 to 151251)       | 288305 (267524 to 313391)       | 180613 (137338 to 273551)       | 69558 (50849 to 113325)      | 111055 (86341 to 160481)       |
|                              | 70+ years         | 53561 (50011 to 57306)          | 22025 (20349 to 23716)          | 31536 (29540 to 33618)          | 11779 (9759 to 15201)           | 5415 (4376 to 7192)          | 6364 (5328 to 8015)            |
| Iraq                         | <70 years         | 245544 (194596 to 327572)       | 77231 (61288 to 105377)         | 168313 (132757 to 226446)       | 270255 (97796 to 721722)        | 106904 (32711 to 320799)     | 163351 (63218 to 382839)       |
|                              | 70+ years         | 15662 (12416 to 21504)          | 6299 (4921 to 8833)             | 9363 (7434 to 12482)            | 5394 (2480 to 13584)            | 2491 (1080 to 6899)          | 2903 (1409 to 6673)            |
| Jordan                       | <70 years         | 36576 (34780 to 38424)          | 11866 (11147 to 12656)          | 24710 (23515 to 25984)          | 11811 (10904 to 13156)          | 4495 (4107 to 5016)          | 7316 (6747 to 8150)            |
|                              | 70+ years         | 2844 (2706 to 2977)             | 1141 (1070 to 1208)             | 1703 (1629 to 1779)             | 545 (505 to 591)                | 245 (225 to 267)             | 301 (279 to 325)               |
| Kuwait                       | <70 years         | 23462 (22211 to 24939)          | 6666 (6252 to 7143)             | 16796 (15888 to 17817)          | 8618 (7046 to 12255)            | 3118 (2456 to 4914)          | 5501 (4572 to 7320)            |
|                              | 70+ years         | 1486 (1412 to 1571)             | 392 (368 to 418)                | 1094 (1041 to 1155)             | 307 (263 to 408)                | 100 (84 to 145)              | 207 (179 to 265)               |
| Lebanon                      | <70 years         | 24072 (20354 to 31732)          | 8871 (7505 to 12025)            | 15200 (12807 to 19947)          | 20104 (8117 to 57225)           | 9524 (3396 to 29721)         | 10580 (4611 to 26976)          |

**Table S31** Age- and sex-specific disability, prevalent cases, and new cases of head and spinal injuries in North Africa and Middle East countries in 2019

|                              | Head Injuries    |                                 |                              |                                 | Spinal Injuries           |                           |                           |
|------------------------------|------------------|---------------------------------|------------------------------|---------------------------------|---------------------------|---------------------------|---------------------------|
|                              | Age              | Both sexes                      | Female                       | Male                            | Both sexes                | Female                    | Male                      |
| Libya                        | 70+ years        | 3973 (3373 to 5276)             | 1829 (1602 to 2338)          | 2144 (1760 to 2963)             | 1303 (678 to 3355)        | 618 (349 to 1600)         | 685 (327 to 1777)         |
|                              | <70 years        | 39571 (36155 to 44257)          | 12055 (11068 to 13442)       | 27516 (25085 to 31052)          | 20299 (12307 to 40598)    | 6973 (4152 to 15127)      | 13327 (8103 to 24760)     |
| Morocco                      | 70+ years        | 3559 (3355 to 3806)             | 1410 (1316 to 1507)          | 2149 (2031 to 2299)             | 678 (555 to 954)          | 286 (233 to 414)          | 392 (319 to 537)          |
|                              | <70 years        | 161004 (153220 to 169198)       | 55391 (52153 to 58744)       | 105613 (100532 to 111171)       | 46129 (42719 to 50424)    | 19731 (18036 to 22032)    | 26398 (24480 to 28641)    |
| Palestine                    | 70+ years        | 18471 (17440 to 19556)          | 8403 (7771 to 9103)          | 10068 (9561 to 10565)           | 3008 (2733 to 3324)       | 1561 (1388 to 1785)       | 1447 (1330 to 1589)       |
|                              | <70 years        | 24833 (18752 to 34685)          | 8019 (6100 to 11360)         | 16813 (12592 to 23619)          | 34095 (11732 to 91840)    | 13755 (3875 to 42418)     | 20340 (7574 to 47478)     |
| Oman                         | 70+ years        | 1333 (1109 to 1730)             | 605 (517 to 759)             | 728 (585 to 965)                | 522 (263 to 1223)         | 225 (117 to 557)          | 297 (143 to 662)          |
|                              | <70 years        | 27190 (25735 to 28824)          | 5489 (5195 to 5831)          | 21700 (20469 to 23031)          | 7286 (6717 to 7866)       | 1695 (1568 to 1824)       | 5591 (5135 to 6069)       |
| Qatar                        | 70+ years        | 945 (889 to 997)                | 381 (357 to 406)             | 563 (532 to 594)                | 145 (130 to 161)          | 63 (57 to 71)             | 81 (73 to 90)             |
|                              | <70 years        | 18716 (17623 to 19927)          | 2542 (2377 to 2720)          | 16174 (15223 to 17232)          | 5391 (4971 to 5826)       | 893 (814 to 972)          | 4497 (4132 to 4875)       |
| Saudi Arabia                 | 70+ years        | 258 (245 to 271)                | 45 (42 to 47)                | 213 (202 to 225)                | 47 (43 to 52)             | 9 (8 to 10)               | 38 (35 to 42)             |
|                              | <70 years        | 355464 (331010 to 382448)       | 74113 (69561 to 79225)       | 281351 (260810 to 304031)       | 97040 (88544 to 106470)   | 23212 (21262 to 25339)    | 73828 (66960 to 81232)    |
| Syrian Arab Republic         | 70+ years        | 14310 (13381 to 15238)          | 4336 (4023 to 4649)          | 9975 (9332 to 10624)            | 2192 (1911 to 2487)       | 748 (660 to 854)          | 1444 (1249 to 1648)       |
|                              | <70 years        | 99142 (69527 to 149003)         | 35907 (26132 to 52850)       | 63235 (43061 to 99023)          | 139759 (44391 to 388498)  | 55317 (15363 to 169985)   | 84442 (27379 to 208932)   |
| Tunisia                      | 70+ years        | 12716 (7855 to 21804)           | 5048 (3147 to 8724)          | 7669 (4675 to 13269)            | 7021 (2080 to 19786)      | 3126 (858 to 9782)        | 3895 (1181 to 10190)      |
|                              | <70 years        | 54754 (52166 to 57487)          | 19066 (17979 to 20163)       | 35688 (33939 to 37552)          | 15204 (14233 to 16374)    | 6235 (5784 to 6764)       | 8969 (8386 to 9719)       |
| Türkiye                      | 70+ years        | 8887 (8454 to 9311)             | 4023 (3797 to 4251)          | 4864 (4640 to 5090)             | 1494 (1384 to 1628)       | 750 (692 to 825)          | 745 (686 to 815)          |
|                              | <70 years        | 358777 (339670 to 381289)       | 128200 (120466 to 136674)    | 230577 (218146 to 245196)       | 126455 (109002 to 158850) | 51820 (44586 to 65829)    | 74635 (63957 to 93347)    |
| United Arab Emirates         | 70+ years        | 69357 (64366 to 74227)          | 38449 (35058 to 41788)       | 30908 (29082 to 32735)          | 12736 (11389 to 14424)    | 7606 (6712 to 8734)       | 5129 (4582 to 5798)       |
|                              | <70 years        | 65749 (62048 to 69757)          | 9464 (8921 to 10054)         | 56286 (53147 to 59933)          | 17200 (15996 to 18500)    | 3071 (2832 to 3327)       | 14129 (13097 to 15269)    |
| Yemen                        | 70+ years        | 543 (514 to 570)                | 160 (150 to 171)             | 383 (363 to 401)                | 77 (70 to 84)             | 25 (23 to 28)             | 52 (47 to 57)             |
|                              | <70 years        | 110040 (95063 to 132378)        | 37464 (32129 to 46473)       | 72576 (62570 to 87561)          | 65936 (33287 to 153393)   | 26542 (12422 to 67550)    | 39394 (20593 to 80722)    |
| Afghanistan                  | 70+ years        | 7681 (6246 to 10343)            | 3231 (2567 to 4510)          | 4450 (3652 to 5883)             | 2675 (1151 to 6631)       | 1303 (507 to 3656)        | 1372 (638 to 3109)        |
|                              | <70 years        | 173717 (114222 to 286048)       | 55994 (34733 to 100187)      | 117723 (79378 to 188750)        | 225866 (63780 to 646622)  | 91898 (20481 to 294646)   | 133967 (43150 to 347268)  |
| Sudan                        | 70+ years        | 8819 (5206 to 16027)            | 3141 (1855 to 5767)          | 5678 (3288 to 10426)            | 3410 (1038 to 9707)       | 1443 (406 to 4504)        | 1967 (628 to 5516)        |
|                              | <70 years        | 70395 (63345 to 80441)          | 22564 (20223 to 26259)       | 47831 (43130 to 54602)          | 85404 (66125 to 132299)   | 35927 (26602 to 61328)    | 49476 (39494 to 73321)    |
|                              | 70+ years        | 6447 (6021 to 6991)             | 2347 (2167 to 2576)          | 4099 (3834 to 4443)             | 3360 (2946 to 4104)       | 1385 (1206 to 1740)       | 1974 (1725 to 2378)       |
|                              | <b>New cases</b> |                                 |                              |                                 |                           |                           |                           |
| Global                       | <70 years        | 23751486 (20176909 to 27444773) | 8237012 (6856154 to 9765169) | 15514474 (13281655 to 17881670) | 688194 (543418 to 868065) | 279968 (217003 to 363066) | 408225 (325737 to 510371) |
|                              | 70+ years        | 3409222 (2771480 to 4143987)    | 2058223 (1653450 to 2548303) | 1350999 (1115275 to 1624095)    | 220807 (150489 to 324936) | 143500 (95961 to 215448)  | 77307 (54892 to 111933)   |
| North Africa and Middle East | <70 years        | 1803668 (1527209 to 2178202)    | 582850 (477280 to 752389)    | 1220818 (1051425 to 1435809)    | 48308 (32057 to 86937)    | 18768 (11294 to 39595)    | 29540 (20638 to 47885)    |
|                              | 70+ years        | 107827 (88248 to 131351)        | 56164 (44868 to 69715)       | 51663 (42474 to 63156)          | 4468 (2635 to 8653)       | 2407 (1412 to 4806)       | 2061 (1173 to 3936)       |
| Algeria                      | <70 years        | 103471 (89337 to 119685)        | 36470 (30808 to 43252)       | 67001 (58098 to 76996)          | 1777 (1454 to 2172)       | 700 (556 to 882)          | 1078 (886 to 1303)        |

**Table S31** Age- and sex-specific disability, prevalent cases, and new cases of head and spinal injuries in North Africa and Middle East countries in 2019

|                            | Head Injuries |                           |                        |                           | Spinal Injuries     |                     |                     |
|----------------------------|---------------|---------------------------|------------------------|---------------------------|---------------------|---------------------|---------------------|
|                            | Age           | Both sexes                | Female                 | Male                      | Both sexes          | Female              | Male                |
| Bahrain                    | 70+ years     | 6347 (5296 to 7440)       | 3041 (2484 to 3631)    | 3307 (2778 to 3917)       | 158 (118 to 209)    | 84 (61 to 114)      | 74 (57 to 96)       |
|                            | <70 years     | 3530 (3066 to 4081)       | 924 (773 to 1113)      | 2606 (2277 to 2999)       | 63 (51 to 76)       | 19 (15 to 23)       | 44 (36 to 54)       |
| Egypt                      | 70+ years     | 76 (64 to 88)             | 32 (27 to 38)          | 44 (37 to 51)             | 2 (1 to 2)          | 1 (1 to 1)          | 1 (1 to 1)          |
|                            | <70 years     | 213803 (183660 to 248129) | 78794 (66097 to 93610) | 135010 (117188 to 154475) | 3853 (3103 to 4835) | 1570 (1236 to 2001) | 2284 (1840 to 2855) |
| Iran (Islamic Republic of) | 70+ years     | 8663 (7061 to 10522)      | 4099 (3248 to 5018)    | 4565 (3702 to 5576)       | 206 (153 to 275)    | 107 (77 to 149)     | 99 (73 to 134)      |
|                            | <70 years     | 208096 (178781 to 241874) | 64894 (54683 to 76275) | 143202 (123488 to 166084) | 3728 (3022 to 4546) | 1289 (1032 to 1621) | 2439 (1974 to 2987) |
| Iraq                       | 70+ years     | 16673 (13348 to 20614)    | 8417 (6495 to 10621)   | 8255 (6687 to 10037)      | 436 (315 to 601)    | 243 (170 to 347)    | 193 (144 to 258)    |
|                            | <70 years     | 137571 (116896 to 163097) | 44151 (36670 to 54027) | 93420 (80088 to 109849)   | 2997 (2141 to 4833) | 1068 (743 to 1881)  | 1928 (1373 to 2980) |
| Jordan                     | 70+ years     | 2721 (2320 to 3166)       | 1323 (1102 to 1556)    | 1398 (1201 to 1622)       | 79 (60 to 110)      | 42 (31 to 59)       | 38 (28 to 53)       |
|                            | <70 years     | 25206 (21596 to 29544)    | 8425 (6967 to 10212)   | 16782 (14477 to 19550)    | 434 (361 to 519)    | 163 (131 to 199)    | 271 (225 to 322)    |
| Kuwait                     | 70+ years     | 832 (708 to 974)          | 370 (308 to 442)       | 462 (395 to 540)          | 22 (17 to 28)       | 11 (8 to 14)        | 11 (9 to 14)        |
|                            | <70 years     | 12151 (10451 to 14201)    | 3535 (2915 to 4280)    | 8616 (7450 to 9994)       | 213 (176 to 256)    | 71 (57 to 88)       | 143 (118 to 171)    |
| Lebanon                    | 70+ years     | 386 (324 to 446)          | 110 (92 to 128)        | 276 (228 to 325)          | 9 (7 to 12)         | 3 (2 to 4)          | 6 (4 to 8)          |
|                            | <70 years     | 11606 (9955 to 13651)     | 4050 (3366 to 4906)    | 7556 (6532 to 8762)       | 211 (174 to 253)    | 85 (69 to 104)      | 126 (104 to 151)    |
| Libya                      | 70+ years     | 1177 (969 to 1403)        | 689 (548 to 859)       | 488 (415 to 570)          | 33 (24 to 44)       | 21 (15 to 29)       | 12 (9 to 15)        |
|                            | <70 years     | 25702 (21255 to 33108)    | 7712 (6188 to 10402)   | 17990 (15057 to 22769)    | 783 (446 to 1600)   | 252 (136 to 581)    | 531 (309 to 1013)   |
| Morocco                    | 70+ years     | 1074 (904 to 1257)        | 497 (406 to 593)       | 577 (487 to 683)          | 33 (23 to 50)       | 16 (11 to 25)       | 16 (11 to 25)       |
|                            | <70 years     | 95597 (82770 to 111624)   | 33221 (27995 to 40050) | 62376 (54160 to 72220)    | 1664 (1372 to 2016) | 689 (560 to 844)    | 975 (798 to 1187)   |
| Palestine                  | 70+ years     | 6592 (5409 to 7901)       | 3714 (2912 to 4637)    | 2877 (2371 to 3412)       | 172 (126 to 233)    | 110 (77 to 156)     | 62 (46 to 82)       |
|                            | <70 years     | 12260 (10520 to 14318)    | 4267 (3529 to 5180)    | 7993 (6918 to 9224)       | 243 (197 to 311)    | 93 (74 to 121)      | 151 (122 to 189)    |
| Oman                       | 70+ years     | 373 (311 to 442)          | 213 (172 to 257)       | 160 (136 to 187)          | 10 (8 to 14)        | 6 (5 to 9)          | 4 (3 to 5)          |
|                            | <70 years     | 16702 (14317 to 19416)    | 3598 (3008 to 4264)    | 13105 (11233 to 15280)    | 269 (217 to 341)    | 64 (49 to 83)       | 205 (167 to 260)    |
| Qatar                      | 70+ years     | 417 (342 to 497)          | 191 (154 to 234)       | 225 (186 to 270)          | 10 (8 to 14)        | 5 (4 to 7)          | 5 (4 to 7)          |
|                            | <70 years     | 11809 (10016 to 14058)    | 1536 (1265 to 1861)    | 10273 (8723 to 12216)     | 202 (166 to 246)    | 30 (24 to 38)       | 173 (142 to 211)    |
| Saudi Arabia               | 70+ years     | 81 (67 to 97)             | 18 (15 to 22)          | 63 (51 to 74)             | 2 (1 to 3)          | 0 (0 to 1)          | 1 (1 to 2)          |
|                            | <70 years     | 237382 (202556 to 282123) | 50179 (42294 to 60899) | 187203 (159918 to 220052) | 4181 (3368 to 5094) | 1015 (805 to 1263)  | 3167 (2546 to 3843) |
| Syrian Arab Republic       | 70+ years     | 4841 (3988 to 5797)       | 1797 (1447 to 2201)    | 3043 (2509 to 3608)       | 123 (90 to 165)     | 52 (37 to 72)       | 71 (52 to 95)       |
|                            | <70 years     | 44535 (34857 to 62035)    | 18340 (13977 to 26483) | 26196 (20823 to 35598)    | 1904 (874 to 4624)  | 835 (371 to 2282)   | 1069 (495 to 2409)  |
| Tunisia                    | 70+ years     | 8295 (4192 to 15643)      | 3364 (1703 to 6756)    | 4931 (2487 to 9236)       | 858 (199 to 2582)   | 391 (81 to 1328)    | 467 (115 to 1300)   |
|                            | <70 years     | 28815 (24934 to 33537)    | 9758 (8168 to 11625)   | 19058 (16577 to 21967)    | 500 (406 to 614)    | 193 (154 to 243)    | 307 (249 to 377)    |
| Türkiye                    | 70+ years     | 2943 (2473 to 3461)       | 1498 (1226 to 1796)    | 1445 (1223 to 1696)       | 73 (55 to 97)       | 41 (30 to 55)       | 32 (25 to 41)       |
|                            | <70 years     | 186544 (161303 to 217911) | 64558 (54277 to 76808) | 121986 (105970 to 140513) | 3475 (2886 to 4208) | 1358 (1100 to 1677) | 2116 (1758 to 2534) |
| United Arab Emirates       | 70+ years     | 32712 (26365 to 40357)    | 20870 (16495 to 26055) | 11843 (9836 to 14089)     | 917 (647 to 1272)   | 627 (427 to 878)    | 289 (215 to 386)    |
|                            | <70 years     | 33014 (28322 to 38377)    | 5122 (4300 to 6110)    | 27892 (23783 to 32650)    | 558 (452 to 690)    | 95 (75 to 123)      | 463 (376 to 569)    |

**Table S31** Age- and sex-specific disability, prevalent cases, and new cases of head and spinal injuries in North Africa and Middle East countries in 2019

|             | Head Injuries |                           |                         | Spinal Injuries          |                      |                      |                      |
|-------------|---------------|---------------------------|-------------------------|--------------------------|----------------------|----------------------|----------------------|
|             | Age           | Both sexes                | Female                  | Male                     | Both sexes           | Female               | Male                 |
| Yemen       | 70+ years     | 169 (135 to 208)          | 62 (49 to 76)           | 108 (86 to 134)          | 4 (3 to 5)           | 1 (1 to 2)           | 2 (2 to 3)           |
|             | <70 years     | 162607 (106330 to 285112) | 54641 (32926 to 113352) | 107966 (72350 to 179275) | 8657 (2886 to 23813) | 3178 (916 to 9906)   | 5479 (1955 to 13149) |
| Afghanistan | 70+ years     | 2291 (1780 to 3033)       | 1054 (820 to 1381)      | 1237 (952 to 1670)       | 106 (51 to 243)      | 51 (24 to 127)       | 55 (26 to 120)       |
|             | <70 years     | 163477 (110009 to 279016) | 65871 (37733 to 136864) | 97606 (70656 to 147371)  | 9417 (3058 to 26788) | 4792 (1238 to 15455) | 4625 (1798 to 11357) |
| Sudan       | 70+ years     | 9267 (4062 to 18874)      | 3985 (1582 to 9017)     | 5282 (2433 to 10213)     | 1036 (208 to 3275)   | 501 (81 to 1750)     | 535 (119 to 1497)    |
|             | <70 years     | 67956 (54505 to 85310)    | 22214 (17234 to 28703)  | 45743 (37156 to 56634)   | 3129 (2489 to 3938)  | 1192 (920 to 1567)   | 1937 (1547 to 2400)  |
|             | 70+ years     | 1788 (1413 to 2222)       | 763 (579 to 967)        | 1025 (799 to 1277)       | 175 (127 to 239)     | 90 (62 to 126)       | 85 (63 to 115)       |

Count data are absolute numbers. Data in parentheses are 95% uncertainty intervals.

***Table S32 Temporal changes in the number of DALY, mortality, incidence, prevalence, and YLD of neurological conditions in North Africa and Middle East and the world from 2010 to 2019***  
(NEXT PAGE)

**Table S32** Temporal changes in the number of DALYs, mortality, incidence, prevalence, and YLDs of neurological conditions in North Africa and Middle East and the world from 2010 to 2019

| Condition            | Location                     | DALYs                   | Deaths                  | Incidence               | Prevalence              | YLDs                    |
|----------------------|------------------------------|-------------------------|-------------------------|-------------------------|-------------------------|-------------------------|
| Meningitis           | Global                       | -32.4% (-40.9 to -21.9) | -27.8% (-35.4 to -18.2) | -8.5% (-11.1 to -5.9)   | -4.3% (-7.1 to -1.4)    | -2.8% (-5.3 to -0.2)    |
|                      | North Africa and Middle East | -42.9% (-51.4 to -33.1) | -36.4% (-44.7 to -26.8) | -3.3% (-7.3 to 0.9)     | 6.7% (0.1 to 14)        | 8.2% (4.1 to 12.5)      |
|                      | Afghanistan                  | -37.4% (-55.3 to -12.5) | -35.2% (-52.3 to -12.1) | -8.1% (-13.4 to -1.9)   | -1.4% (-20.1 to 22.6)   | 3.3% (-8.5 to 16.4)     |
|                      | Algeria                      | -37.3% (-51.5 to -19.7) | -27% (-43.4 to -6.8)    | 13.7% (6 to 21)         | 17.4% (-2.6 to 42.8)    | 18.9% (10.2 to 28)      |
|                      | Bahrain                      | -5.4% (-18.9 to 10.7)   | -4.2% (-20.4 to 17.5)   | 60.5% (39.8 to 82.5)    | 65.6% (33.3 to 103.2)   | 61.9% (41.1 to 81.5)    |
|                      | Egypt                        | -33.8% (-51.7 to -9.2)  | -31.2% (-51.2 to -5)    | 0.2% (-8.2 to 8.7)      | 6.3% (-11.2 to 29.6)    | 8.4% (-2.4 to 20.3)     |
|                      | Iran                         | -44.8% (-52.9 to -34.7) | -33.2% (-41.8 to -21.8) | 22.2% (14.9 to 30.7)    | 28.8% (22.1 to 35.4)    | 30.2% (22.4 to 37.7)    |
|                      | Iraq                         | -54.8% (-65.7 to -41.2) | -49.8% (-61.3 to -35.9) | -11.8% (-18.6 to -5.1)  | -2.5% (-19.3 to 19.4)   | 3% (-6.1 to 12.5)       |
|                      | Jordan                       | 53.2% (23.6 to 89.6)    | 58.9% (28.6 to 96.6)    | 96.4% (83.7 to 110.3)   | 119.8% (86.9 to 163.1)  | 110.2% (76.3 to 149.5)  |
|                      | Kuwait                       | 17.1% (-3.2 to 39.8)    | 20.9% (-2 to 47.7)      | 70.2% (56.5 to 87.5)    | 91.1% (58.7 to 132.9)   | 91% (77.5 to 106.2)     |
|                      | Lebanon                      | -18.2% (-35.7 to 1.6)   | -12.1% (-29.1 to 8.8)   | 26.6% (18.3 to 35.4)    | 35.4% (14.1 to 63.5)    | 34.9% (24.4 to 45.3)    |
|                      | Libya                        | -24.8% (-41.4 to -4.6)  | -10% (-31.8 to 15.6)    | 6.3% (-2.4 to 14.9)     | 60.8% (33.5 to 96.9)    | 59.6% (47.3 to 76.6)    |
|                      | Morocco                      | -58.4% (-70.4 to -42.2) | -47.1% (-61.4 to -28.9) | -14.4% (-20.3 to -7.8)  | -3.9% (-20.8 to 19)     | -0.9% (-13.5 to 14)     |
|                      | Oman                         | 3.6% (-12.7 to 21.9)    | -4.1% (-18.1 to 12.1)   | 70.7% (57 to 85.9)      | 129.3% (87.9 to 178.8)  | 126.3% (105.3 to 148.1) |
|                      | Palestine                    | -50.9% (-63.1 to -35.4) | -45.4% (-58.3 to -29.5) | -0.4% (-8.6 to 8.3)     | 11.9% (-6.4 to 34.7)    | 7.3% (-4.6 to 19.8)     |
|                      | Qatar                        | 38.6% (14.9 to 65.6)    | 11.8% (-12.4 to 40.4)   | 124.5% (110.7 to 138)   | 120.3% (79.2 to 168.6)  | 121% (63 to 194.3)      |
|                      | Saudi Arabia                 | 4.9% (-17.2 to 34.4)    | 4.1% (-18.9 to 35.1)    | 41% (29.7 to 55.4)      | 67.9% (39.5 to 103.6)   | 61.9% (46.8 to 78.4)    |
|                      | Sudan                        | -59.2% (-71.1 to -40.8) | -54% (-67.1 to -35.2)   | -57.5% (-60.9 to -54)   | -52.2% (-60.8 to -40.8) | -51.3% (-55.7 to -46.5) |
|                      | Syrian Arab Republic         | -46.3% (-57.1 to -32.5) | -38.2% (-51.2 to -21.7) | -28.5% (-33.9 to -22.4) | -7.9% (-22.7 to 12.2)   | -14.4% (-23.6 to -4.3)  |
|                      | Tunisia                      | -34.3% (-48.8 to -14.5) | -25% (-41.2 to -0.4)    | 4.4% (-2.4 to 10.5)     | 11.5% (-7 to 35.8)      | 11.1% (-2 to 27.2)      |
| Turkey               | -34.7% (-47.8 to -17.3)      | -22.4% (-38.2 to -4.1)  | 5.1% (-2.7 to 14)       | -0.2% (-16.4 to 21.8)   | -4% (-15.2 to 7.1)      |                         |
| United Arab Emirates | 7.1% (-18.4 to 38.9)         | 23.6% (-7.6 to 66.7)    | 17.1% (2.8 to 34.2)     | 22.8% (1.7 to 49.7)     | 19% (11 to 28.1)        |                         |
| Yemen                | -36.1% (-53.5 to -11.9)      | -29.1% (-47.8 to -5.4)  | 3.7% (-4.9 to 12.1)     | 46.8% (19 to 82.3)      | 45.7% (33 to 59.7)      |                         |
| Encephalitis         | Global                       | -7.6% (-17.6 to 4)      | 3.5% (-7.2 to 16)       | 10.6% (8.9 to 12.3)     | 5.4% (4.1 to 6.7)       | 4.6% (2 to 7.1)         |
|                      | North Africa and Middle East | -0.1% (-16.4 to 17.9)   | 5.3% (-9.8 to 21.8)     | 13.3% (11.1 to 16)      | 22.1% (19.9 to 24.5)    | 21.6% (18.2 to 24.7)    |
|                      | Afghanistan                  | 18.8% (-6.7 to 53.8)    | 17.7% (-5.4 to 46.9)    | 15.5% (10.1 to 21.2)    | 22.5% (14.4 to 31.2)    | 26.9% (14.1 to 41.6)    |
|                      | Algeria                      | 2.8% (-20.6 to 33.7)    | 10.1% (-11.9 to 43.3)   | 18.9% (13.9 to 25.4)    | 21.6% (16.2 to 27.5)    | 21.3% (13.7 to 28.7)    |
|                      | Bahrain                      | -13% (-28.9 to 11.7)    | -7.5% (-28.8 to 28)     | 14.3% (7.8 to 22.4)     | 22.9% (15.8 to 31.4)    | 17% (3.4 to 26.7)       |
|                      | Egypt                        | -5% (-35.5 to 39.3)     | -0.7% (-31.5 to 41.4)   | 7.7% (2.8 to 13.9)      | 11.2% (5.8 to 16.9)     | 11% (3.2 to 18.5)       |
|                      | Iran                         | 9.8% (-8.3 to 27.4)     | 25.9% (-0.9 to 44.9)    | 16.5% (13.3 to 19.8)    | 24% (21.8 to 26.6)      | 24.6% (18.3 to 29)      |
|                      | Iraq                         | -11.9% (-34.8 to 17.1)  | -6.1% (-27.9 to 19.4)   | 5.5% (0.2 to 10.7)      | 15.8% (9.8 to 21.6)     | 19.5% (11.2 to 26.8)    |
|                      | Jordan                       | 9.8% (-15.7 to 54.4)    | 6.4% (-22.4 to 61.3)    | 51.9% (44.2 to 60.4)    | 69.9% (61.7 to 78.5)    | 67.3% (53.4 to 76.6)    |
|                      | Kuwait                       | 20.6% (0.8 to 45.9)     | 22.9% (0.6 to 53.2)     | 45.7% (38.5 to 53.5)    | 66.8% (56.2 to 78.6)    | 67.4% (58.8 to 76.7)    |
|                      | Lebanon                      | 14.8% (-9.3 to 43.3)    | 18.2% (-5.4 to 46.1)    | 11.9% (7.1 to 17)       | 20.5% (14.6 to 26.5)    | 20.9% (11.2 to 30.3)    |
|                      | Libya                        | 5.2% (-18.9 to 36.1)    | 16% (-9.1 to 50.5)      | 3.3% (-2.6 to 9.1)      | 57.5% (49.4 to 66.1)    | 56.4% (46.3 to 72.4)    |
|                      | Morocco                      | -16.6% (-37.3 to 10.6)  | -6.1% (-26.7 to 21.5)   | 2% (-2.8 to 6.9)        | 10.3% (4.9 to 15.4)     | 11.6% (5.1 to 18.4)     |
|                      | Oman                         | 38.6% (10.1 to 71.6)    | 38.5% (9.5 to 66.9)     | 27.4% (21 to 34)        | 59.6% (48.6 to 69.8)    | 59.3% (45.5 to 70.4)    |
|                      | Palestine                    | -11% (-29.8 to 11.3)    | -9.7% (-30 to 12.8)     | 12.8% (7.6 to 18)       | 24.9% (18.6 to 31.6)    | 19.3% (7 to 30.4)       |
|                      | Qatar                        | 55.1% (22.8 to 95.2)    | 56.3% (17.7 to 105.7)   | 68.5% (61 to 76.6)      | 81.4% (65.9 to 97.7)    | 84.9% (75.5 to 94.5)    |
|                      | Saudi Arabia                 | 25.9% (-0.6 to 63)      | 31.7% (3.6 to 73.1)     | 16.2% (9.8 to 22.2)     | 34% (25.8 to 43.8)      | 29.9% (18.9 to 39.9)    |
|                      | Sudan                        | -2.1% (-35.8 to 50)     | 0.5% (-32 to 49.1)      | 15.8% (10.3 to 22.5)    | 28.1% (20.8 to 36.1)    | 30.2% (21.2 to 39.2)    |
|                      | Syrian Arab Republic         | -37.6% (-50 to -22.2)   | -26.5% (-42.6 to -7.5)  | -36.5% (-40.8 to -32)   | -17.8% (-21.6 to -13.4) | -21% (-25 to -16.7)     |
|                      | Tunisia                      | -3.1% (-24.2 to 23)     | 5.5% (-19.2 to 38.7)    | 7.6% (2.3 to 13.6)      | 13.8% (8.8 to 19)       | 13.2% (6.5 to 19.1)     |
| Turkey               | -14.6% (-31.3 to 5.1)        | -8.9% (-28.3 to 15.3)   | 29.5% (21.6 to 38.4)    | 31.5% (24.1 to 39.1)    | 24.2% (10.4 to 37.2)    |                         |
| United Arab Emirates | 1% (-24.7 to 37.5)           | 14.9% (-18.3 to 66.9)   | 9.5% (-0.5 to 21.1)     | 13.1% (5.1 to 21.6)     | 9.8% (3.9 to 15.6)      |                         |
| Yemen                | -4.8% (-36.7 to 42)          | -1.6% (-34.7 to 44)     | 18.4% (12.1 to 25)      | 58.7% (49.4 to 68.5)    | 56.2% (46.4 to 67.1)    |                         |
| Tetanus              | Global                       | -48.3% (-60.3 to -34.9) | -44.9% (-56.4 to -32.4) | -45.1% (-56.5 to -32.2) | -17.7% (-21 to -15.1)   | -27.7% (-35.8 to -21.5) |
|                      | North Africa and Middle East | -58.5% (-75.4 to -36.3) | -55.2% (-71.5 to -36.7) | -53.2% (-69.8 to -34.5) | -11.9% (-23.4 to -3)    | -35.7% (-53 to -18)     |
|                      | Afghanistan                  | -61.2% (-80.2 to -29.9) | -60.2% (-78.1 to -35)   | -58.6% (-77 to -32.2)   | -21.1% (-39.7 to -2.4)  | -48.5% (-68.3 to -21.1) |



**Table S32** Temporal changes in the number of DALYs, mortality, incidence, prevalence, and YLDs of neurological conditions in North Africa and Middle East and the world from 2010 to 2019

| Condition                               | Location                     | DALYs                        | Deaths                  | Incidence               | Prevalence              | YLDs                    |                      |
|-----------------------------------------|------------------------------|------------------------------|-------------------------|-------------------------|-------------------------|-------------------------|----------------------|
|                                         | Algeria                      | -29.9% (-53.1 to 8.8)        | -22.8% (-43.5 to 9.7)   | -20.5% (-41.6 to 12.2)  | 9% (-3.6 to 21.9)       | -1.5% (-18.8 to 14.7)   |                      |
|                                         | Bahrain                      | 6.5% (-10 to 23.6)           | 15.9% (-2.9 to 36.3)    | 15% (-4.9 to 36.8)      | 15.8% (11.2 to 20.8)    | 13% (4.5 to 19.4)       |                      |
|                                         | Egypt                        | -36.7% (-70 to 12.2)         | -30.2% (-62.7 to 17.8)  | -28.3% (-61.9 to 21.1)  | -0.3% (-13.8 to 13.6)   | -12% (-33.8 to 13.7)    |                      |
|                                         | Iran                         | -39.6% (-53.1 to -18.2)      | -30.3% (-44.3 to -11.2) | -30% (-43.8 to -10.1)   | 4.2% (-4.1 to 10.7)     | -10.1% (-23.3 to 0.7)   |                      |
|                                         | Iraq                         | -66.8% (-82.2 to -37.9)      | -64.3% (-79 to -36.3)   | -63.3% (-79 to -33.4)   | -21.1% (-30.7 to -9.7)  | -35% (-51.5 to -17.7)   |                      |
|                                         | Jordan                       | 26.3% (-2.7 to 69.9)         | 33.5% (7 to 72.5)       | 37% (6.8 to 75.4)       | 60.2% (47.5 to 74.9)    | 52.5% (36.4 to 66.7)    |                      |
|                                         | Kuwait                       | 61.2% (-24.3 to 309.6)       | 69.9% (-28.8 to 410.2)  | 68.2% (-29.4 to 402.4)  | 47.3% (38.8 to 55.5)    | 43.7% (28.4 to 57)      |                      |
|                                         | Lebanon                      | -11.8% (-54.5 to 38.7)       | -17.3% (-51.1 to 17.3)  | -15.4% (-50.8 to 20.1)  | -6.3% (-31.9 to 22.2)   | -13.7% (-44.3 to 20.3)  |                      |
|                                         | Libya                        | -1.1% (-27.2 to 36.8)        | 12% (-15.5 to 51.7)     | 9.8% (-17 to 47.2)      | 10.7% (2.2 to 20.4)     | 7.2% (-5.8 to 22)       |                      |
|                                         | Morocco                      | -64.5% (-85.7 to -23.1)      | -59.5% (-83.2 to -17.1) | -58.7% (-82.8 to -15.5) | -17.3% (-29.8 to -5.5)  | -34.9% (-60.2 to -4.8)  |                      |
|                                         | Oman                         | 17.4% (-5.9 to 40.7)         | 12.2% (-11.6 to 41.7)   | 15% (-9.1 to 44.5)      | 62.3% (51.5 to 76.3)    | 44.9% (26.2 to 59.8)    |                      |
|                                         | Palestine                    | -37.1% (-56.6 to -4.3)       | -32.7% (-51 to -3.9)    | -29.9% (-48.8 to -1.8)  | 7.6% (-7.1 to 23.1)     | -4.7% (-21.6 to 11.4)   |                      |
|                                         | Qatar                        | 54.4% (24 to 88.5)           | 56.8% (25.1 to 92.4)    | 58.7% (26 to 94.4)      | 66.9% (55.8 to 78.4)    | 55.6% (36 to 74.9)      |                      |
|                                         | Saudi Arabia                 | -7.8% (-49.6 to 45.5)        | -2.3% (-46.4 to 52.6)   | 0.7% (-44.6 to 59.8)    | 27.1% (9.1 to 43.8)     | 14.9% (-9.4 to 40)      |                      |
|                                         | Sudan                        | -67.1% (-82.8 to -33.1)      | -64.1% (-80.2 to -34.6) | -62.7% (-79.4 to -31.3) | -19.1% (-33.5 to -6.2)  | -39% (-59.1 to -16.2)   |                      |
|                                         | Syrian Arab Republic         | -49% (-69.6 to -13.4)        | -40.8% (-63.2 to -4.5)  | -40.7% (-63.1 to -5.1)  | -30.7% (-35.9 to -25.1) | -34.6% (-43.7 to -23.7) |                      |
|                                         | Tunisia                      | -24% (-45.5 to 3.5)          | -17.5% (-40 to 11.4)    | -15.8% (-38.2 to 12.8)  | 6% (-3.4 to 15.2)       | -2.1% (-16 to 9.7)      |                      |
|                                         | Turkey                       | -36.7% (-52.6 to -16.2)      | -32.7% (-49 to -11.6)   | -31.5% (-47.6 to -9.6)  | 13% (1 to 26.1)         | 2.1% (-13.1 to 16.2)    |                      |
|                                         | United Arab Emirates         | 16.6% (-40.4 to 84)          | 21.1% (-34.1 to 87.8)   | 21.2% (-34.2 to 86.9)   | 4.8% (-17.4 to 30.4)    | 17% (-27.2 to 68.4)     |                      |
|                                         | Yemen                        | -39.5% (-68.6 to 42.3)       | -34.6% (-64.3 to 36.8)  | -33.6% (-63.3 to 36.3)  | 0% (-15.6 to 15.1)      | -16.1% (-43.1 to 19.5)  |                      |
| Brain and central nervous system cancer | Global                       | 11.6% (-1.3 to 20.8)         | 19.3% (7.6 to 27.5)     | 22.4% (9 to 32.9)       | 29.6% (14 to 41.7)      | 25.9% (11.6 to 36.9)    |                      |
|                                         | North Africa and Middle East | 21.8% (1.9 to 35.7)          | 32.2% (11.6 to 46.4)    | 40.8% (17.7 to 56.7)    | 58.7% (31 to 78.8)      | 50% (24.6 to 68.9)      |                      |
|                                         | Afghanistan                  | 25.7% (-3.1 to 72.4)         | 28.5% (2.8 to 66.2)     | 30.7% (3.6 to 72.9)     | 36.6% (3.5 to 88.1)     | 32.9% (3.9 to 76.7)     |                      |
|                                         | Algeria                      | 16.3% (-5.3 to 44.2)         | 24.4% (1.3 to 54.3)     | 35.5% (9.3 to 70.5)     | 57.6% (22.7 to 102.1)   | 46.7% (15.8 to 86.1)    |                      |
|                                         | Bahrain                      | 34.2% (8.6 to 64.3)          | 49.9% (19.5 to 86.6)    | 52.9% (22.4 to 88.9)    | 58.3% (24 to 100)       | 59.1% (21.6 to 102.5)   |                      |
|                                         | Egypt                        | 13.6% (-14.3 to 45.3)        | 16.8% (-12.8 to 49.2)   | 24.9% (-5.8 to 59.7)    | 46.6% (8.2 to 91.4)     | 33.2% (0.1 to 71.5)     |                      |
|                                         | Iran                         | 26.5% (-10.9 to 41.1)        | 43.8% (4.3 to 60.2)     | 54% (10.8 to 73.4)      | 72.4% (21.6 to 106.7)   | 64.4% (16.9 to 91.1)    |                      |
|                                         | Iraq                         | 37.6% (-3.8 to 78.2)         | 52.4% (6.8 to 97.1)     | 62.3% (14.7 to 110.8)   | 87.2% (28.6 to 151.6)   | 72.4% (19.2 to 132.3)   |                      |
|                                         | Jordan                       | 64.3% (37.2 to 95.5)         | 74.5% (45.2 to 108.7)   | 92% (61.2 to 128.7)     | 119.9% (77.7 to 169.1)  | 106.5% (62.9 to 157.2)  |                      |
|                                         | Kuwait                       | 47.2% (19.6 to 80.5)         | 55.5% (26.5 to 90.9)    | 75.9% (42.2 to 118.2)   | 93.2% (50.9 to 143.7)   | 88.7% (45.5 to 142.8)   |                      |
|                                         | Lebanon                      | 25.1% (3.3 to 49.7)          | 23.4% (3.8 to 46)       | 47.7% (22.5 to 77.3)    | 76.8% (40.1 to 121.9)   | 61.9% (28.2 to 105.1)   |                      |
|                                         | Libya                        | 17.3% (-6.7 to 46.4)         | 31.3% (4.7 to 62.1)     | 18.7% (-4.6 to 48.8)    | 0.2% (-22.4 to 29.6)    | 12.4% (-14.4 to 47.9)   |                      |
|                                         | Morocco                      | 8.2% (-16.5 to 37.1)         | 19.5% (-5.3 to 50.6)    | 23.6% (-3.9 to 56.7)    | 38% (1.6 to 81.8)       | 30.2% (-0.2 to 66.4)    |                      |
|                                         | Oman                         | 41.7% (7.2 to 74)            | 40.3% (6.3 to 74.6)     | 66.5% (26.2 to 108.4)   | 95.2% (47 to 153.2)     | 82.6% (27.6 to 150.9)   |                      |
|                                         | Palestine                    | 33.5% (10 to 58.1)           | 41.7% (16.5 to 67.9)    | 54.5% (27.9 to 83.4)    | 82.1% (46 to 127.1)     | 66.8% (31.6 to 108.4)   |                      |
|                                         | Qatar                        | 56.3% (19 to 100)            | 64.4% (22.8 to 112.5)   | 86.5% (39.5 to 143.2)   | 104.2% (49.2 to 172.6)  | 97.4% (39.6 to 178.7)   |                      |
|                                         | Saudi Arabia                 | 31.8% (3.1 to 69)            | 33.2% (3.5 to 70.4)     | 66.9% (29.9 to 116.1)   | 113.5% (60.4 to 186.1)  | 92.5% (42.9 to 161)     |                      |
|                                         | Sudan                        | 13.8% (-16.9 to 54.8)        | 21% (-7.4 to 55.7)      | 27% (-5.3 to 67.3)      | 43.3% (0.5 to 102.8)    | 33.6% (-3.3 to 82.6)    |                      |
|                                         | Syrian Arab Republic         | -13.4% (-33.8 to 11.4)       | 3.7% (-21.1 to 34.5)    | -5.3% (-27.6 to 22.4)   | -18.6% (-37.9 to 7.4)   | -9.2% (-32.9 to 21.3)   |                      |
|                                         | Tunisia                      | 11.6% (-13.3 to 44.4)        | 21.9% (-4.8 to 57.9)    | 30.4% (1.3 to 68.4)     | 44% (9.9 to 89.8)       | 39.8% (7.4 to 80.4)     |                      |
|                                         | Turkey                       | 18% (-9.9 to 47)             | 30.3% (-1.9 to 64.2)    | 38.3% (5.4 to 71.3)     | 51.9% (16.2 to 91.3)    | 46.7% (10.7 to 89.8)    |                      |
|                                         | United Arab Emirates         | 49.1% (16 to 91.9)           | 71.3% (33.7 to 119.9)   | 62.2% (24.2 to 111.5)   | 49.3% (10.2 to 102.4)   | 59.3% (13 to 121.3)     |                      |
|                                         | Yemen                        | 28.3% (0.7 to 67.7)          | 37% (10.8 to 71.1)      | 35.5% (8.3 to 70.9)     | 33.6% (1.9 to 75)       | 35.8% (6.6 to 73.2)     |                      |
|                                         | Stroke*                      | Global                       | 9.6% (3.3 to 16.3)      | 12.2% (5.2 to 19.2)     | 24.7% (22.1 to 27.5)    | 27.1% (25.3 to 29)      | 28.1% (26 to 30.4)   |
|                                         |                              | North Africa and Middle East | 14.8% (6.9 to 23.6)     | 17.9% (9.6 to 27)       | 33.1% (29.5 to 36.9)    | 32.6% (30.9 to 34.5)    | 31.8% (29.7 to 34)   |
|                                         |                              | Afghanistan                  | 15% (-3.9 to 37)        | 11.1% (-7.3 to 32.2)    | 31.3% (25.1 to 37.7)    | 35.4% (29.7 to 41.2)    | 33.4% (26.4 to 41.1) |
|                                         |                              | Algeria                      | 20.9% (2.3 to 43.5)     | 28.5% (6.9 to 54.4)     | 34.1% (25.7 to 43.1)    | 31.6% (26.2 to 37.2)    | 31.2% (24.8 to 38.1) |
| Bahrain                                 |                              | 40.5% (21.2 to 62.6)         | 43.7% (20.2 to 70.9)    | 57.2% (46.8 to 68.3)    | 56% (48 to 64.1)        | 53.6% (43.5 to 64.5)    |                      |
| Egypt                                   |                              | 5.5% (-15.7 to 32.3)         | 12.9% (-12.2 to 41.3)   | 32.6% (24.9 to 41.2)    | 32.2% (26.9 to 38.1)    | 31.9% (25.5 to 38.8)    |                      |

**Table S32** Temporal changes in the number of DALYs, mortality, incidence, prevalence, and YLDs of neurological conditions in North Africa and Middle East and the world from 2010 to 2019

| Condition                 | Location                     | DALYs                  | Deaths                | Incidence              | Prevalence            | YLDs                  |
|---------------------------|------------------------------|------------------------|-----------------------|------------------------|-----------------------|-----------------------|
|                           | Iran                         | 13·6% (8·2 to 18·9)    | 17·5% (11·2 to 24·1)  | 32·4% (28·3 to 36·4)   | 30·9% (28·6 to 33·5)  | 29·7% (27·2 to 32·4)  |
|                           | Iraq                         | 26·4% (8·1 to 49·6)    | 31·7% (12·1 to 54)    | 38·4% (29·9 to 47·2)   | 40·8% (35·4 to 46·4)  | 40·3% (33·7 to 47·6)  |
|                           | Jordan                       | 72·7% (50·9 to 96·9)   | 74·5% (47·6 to 104·6) | 72·2% (59 to 84·8)     | 80·4% (71·4 to 91·1)  | 79·6% (69·6 to 91·3)  |
|                           | Kuwait                       | 35% (17·7 to 54·8)     | 32% (10·4 to 54·9)    | 52·9% (42·8 to 64·7)   | 54·7% (47·1 to 63·4)  | 53·2% (43·9 to 63)    |
|                           | Lebanon                      | 17·1% (5·4 to 29·7)    | 15·5% (-0·8 to 33)    | 35·2% (26·5 to 44·6)   | 31·5% (26·1 to 37·3)  | 31·4% (25·1 to 38·8)  |
|                           | Libya                        | 35·2% (13·2 to 62·8)   | 43·1% (17·3 to 74·6)  | 47·5% (38·8 to 56·2)   | 43% (36·8 to 48·8)    | 41·2% (34·4 to 49·1)  |
|                           | Morocco                      | 17·2% (-1·4 to 38·7)   | 20·8% (1 to 45·9)     | 25·8% (17·6 to 33·7)   | 26·6% (21·5 to 32·1)  | 25·9% (19·5 to 32·4)  |
|                           | Oman                         | 4·5% (-6·8 to 18·3)    | -1·8% (-13·3 to 10·9) | 48·4% (40·2 to 57·6)   | 60·5% (52·9 to 68·5)  | 57·6% (48·5 to 67·6)  |
|                           | Palestine                    | 20·9% (4·1 to 37)      | 19·6% (1·9 to 36·5)   | 45·4% (36·3 to 54·7)   | 41·8% (34·8 to 49·2)  | 41·3% (32·9 to 49·7)  |
|                           | Qatar                        | 39·4% (16·8 to 64·2)   | 33·7% (3·6 to 68)     | 59·6% (49·3 to 70·7)   | 67·6% (58·6 to 77·2)  | 68·6% (55·2 to 82)    |
|                           | Saudi Arabia                 | 23·8% (2 to 48·5)      | 14·7% (-7·2 to 37·4)  | 44·6% (36·1 to 54·1)   | 50·1% (43·9 to 57·2)  | 47·7% (40·1 to 56·7)  |
|                           | Sudan                        | 6·7% (-9·6 to 25·5)    | 8·8% (-6·2 to 27·9)   | 26·1% (19·8 to 33·4)   | 29·6% (24 to 34·7)    | 28·8% (22·6 to 35·5)  |
|                           | Syrian Arab Republic         | 7·1% (-14·7 to 34·5)   | 20·9% (-4·8 to 53·4)  | 9·9% (3·1 to 17·1)     | 6·7% (2 to 11·3)      | 5·8% (-0·2 to 12)     |
|                           | Tunisia                      | 15·9% (-7·2 to 42·5)   | 17·2% (-8 to 46·3)    | 33·3% (24·9 to 42·2)   | 31·5% (25·8 to 37·5)  | 30·7% (23·9 to 37·7)  |
|                           | Turkey                       | 6·2% (-12·6 to 28·6)   | 7·8% (-12·7 to 32·1)  | 28·2% (22·1 to 35·7)   | 22·2% (17·3 to 27·3)  | 22·5% (16·5 to 28·8)  |
|                           | United Arab Emirates         | 91% (54·4 to 136·7)    | 91·5% (50 to 142·9)   | 104·7% (86·2 to 122·2) | 86·9% (75·9 to 99·2)  | 83·4% (68·7 to 99)    |
|                           | Yemen                        | 32·5% (12·4 to 56·4)   | 34·3% (15 to 58·5)    | 33·5% (27·5 to 39·6)   | 35·1% (29·2 to 40·9)  | 34·7% (27·9 to 42·3)  |
| Ischaemic stroke          | Global                       | 19·1% (12·8 to 25·4)   | 20·2% (13·3 to 27·2)  | 31·4% (27·6 to 35·3)   | 30% (27·6 to 32·7)    | 31·8% (29 to 34·7)    |
|                           | North Africa and Middle East | 24% (16·5 to 32·5)     | 24% (15·2 to 32·9)    | 37·6% (32·5 to 42·6)   | 33·9% (32 to 35·8)    | 33·6% (31·1 to 36)    |
|                           | Afghanistan                  | 23·4% (4·9 to 46·4)    | 17·6% (-1 to 40·1)    | 38·7% (28·8 to 48·3)   | 36·6% (31·4 to 41·6)  | 34·9% (26·2 to 44·2)  |
|                           | Algeria                      | 29·9% (9·7 to 53·1)    | 36·1% (12 to 64)      | 38·5% (27·5 to 50·7)   | 33·8% (28·1 to 39·6)  | 33·6% (26 to 42)      |
|                           | Bahrain                      | 51·3% (33·2 to 70·8)   | 50·1% (26·8 to 76·4)  | 62·4% (47·4 to 78·3)   | 58·7% (51·6 to 66·4)  | 58·4% (45·8 to 72·4)  |
|                           | Egypt                        | 21·8% (-0·7 to 48·8)   | 23·2% (-3·2 to 55)    | 37·5% (26·6 to 49·1)   | 34·5% (29 to 39·9)    | 34·4% (27 to 42·1)    |
|                           | Iran                         | 16·9% (10·7 to 22·6)   | 19·8% (12·9 to 27)    | 36·7% (31·8 to 41·6)   | 30·3% (27·9 to 33)    | 30·3% (27·4 to 33·5)  |
|                           | Iraq                         | 36·8% (17·8 to 59·1)   | 39·4% (20·1 to 63·9)  | 43·1% (30·7 to 56·4)   | 42% (36·6 to 47·7)    | 42·1% (33·5 to 50·5)  |
|                           | Jordan                       | 76·1% (54·8 to 99·5)   | 77·9% (51·5 to 108·9) | 70·6% (54·1 to 86·1)   | 79·9% (70·3 to 91·1)  | 79·9% (68·2 to 93·9)  |
|                           | Kuwait                       | 27% (10·7 to 44·9)     | 23·2% (2·5 to 45·4)   | 47·2% (34·3 to 62·6)   | 49·5% (42·4 to 57·2)  | 48·7% (37·5 to 60·5)  |
|                           | Lebanon                      | 19·5% (7·7 to 32·8)    | 18·5% (1·7 to 37·5)   | 35·3% (25 to 47·2)     | 31·3% (25·9 to 37·3)  | 31·3% (24 to 39·8)    |
|                           | Libya                        | 43·5% (20·5 to 72)     | 46·2% (19·2 to 77·6)  | 50% (39 to 61·3)       | 43·6% (37·4 to 49)    | 42·8% (34·2 to 51·5)  |
|                           | Morocco                      | 26·7% (7·4 to 48·4)    | 27·4% (6·5 to 53·2)   | 30·7% (19·7 to 41·2)   | 29·1% (23·9 to 34·3)  | 28·6% (21·4 to 36·4)  |
|                           | Oman                         | 10% (-2·9 to 26·1)     | 1·2% (-12 to 15·6)    | 51·6% (40·4 to 63)     | 59·2% (53·1 to 65·6)  | 56·9% (45·8 to 69·5)  |
|                           | Palestine                    | 45·9% (25·8 to 66·6)   | 44·9% (22·7 to 66·5)  | 57·4% (44·9 to 71·1)   | 47·9% (40·6 to 55·2)  | 47·8% (37·7 to 58·3)  |
|                           | Qatar                        | 55·4% (36 to 76·7)     | 40·8% (10·2 to 76·6)  | 63·4% (48·8 to 80·6)   | 72·8% (65·9 to 79·9)  | 73·7% (57·5 to 92)    |
|                           | Saudi Arabia                 | 27·5% (6·7 to 50·1)    | 15·8% (-6 to 36·9)    | 47·3% (34·9 to 61·6)   | 49·7% (44·1 to 55·3)  | 48·1% (38·7 to 59·3)  |
|                           | Sudan                        | 19·7% (4·1 to 38·2)    | 17·4% (2 to 39·3)     | 31·8% (22·8 to 43·2)   | 32% (26·8 to 36·6)    | 31·4% (24·1 to 39·4)  |
|                           | Syrian Arab Republic         | 21·5% (-1·1 to 49·6)   | 28·8% (2 to 61·7)     | 15·9% (5·8 to 26·6)    | 10·7% (5·9 to 16)     | 10·8% (3·6 to 18·6)   |
|                           | Tunisia                      | 22% (-1·5 to 49·3)     | 21·4% (-4 to 51·6)    | 36·6% (25·6 to 48·2)   | 32·8% (26·9 to 38·5)  | 32·8% (24·9 to 40·7)  |
|                           | Turkey                       | 10·1% (-8·2 to 31·8)   | 10·2% (-11·5 to 34·9) | 31% (22 to 41·8)       | 23·1% (17·9 to 28)    | 23·7% (15·9 to 31·4)  |
|                           | United Arab Emirates         | 105·1% (69·3 to 146·2) | 96·1% (55·3 to 146·1) | 114% (87·9 to 138·6)   | 93·2% (83·1 to 104·6) | 93·1% (73·5 to 112·5) |
|                           | Yemen                        | 41·6% (22 to 64·3)     | 40·9% (21·6 to 66·7)  | 37·7% (28·9 to 47·1)   | 37·2% (32·2 to 42·7)  | 36·9% (28·5 to 46·5)  |
| Intracerebral haemorrhage | Global                       | 2·4% (-4·6 to 9·5)     | 4·3% (-2·9 to 11·7)   | 13·5% (10·3 to 16·3)   | 18·5% (17·2 to 19·9)  | 18·1% (16·6 to 19·7)  |
|                           | North Africa and Middle East | 4·7% (-4·3 to 15·3)    | 8·1% (-0·4 to 18·2)   | 20·6% (17·5 to 23·8)   | 25·3% (23·3 to 27·3)  | 24·8% (20·8 to 28·9)  |
|                           | Afghanistan                  | 9·3% (-10·1 to 32·8)   | 5·3% (-14 to 28·4)    | 20·9% (14·5 to 27·4)   | 29·5% (22·9 to 36·8)  | 28·5% (15·5 to 43)    |
|                           | Algeria                      | 5·4% (-14 to 28·4)     | 10·6% (-10·9 to 36·5) | 18·7% (11·8 to 25·9)   | 19·1% (14·5 to 23·4)  | 19·1% (6·7 to 32·8)   |
|                           | Bahrain                      | 31·9% (9·4 to 58·5)    | 36·6% (11·4 to 66·7)  | 34·9% (24·5 to 48·3)   | 39·3% (33 to 46·1)    | 38·4% (19·6 to 59·3)  |
|                           | Egypt                        | -8·4% (-29·5 to 19·7)  | -0·7% (-24·8 to 29)   | 18·3% (12·1 to 25·5)   | 21·9% (17·4 to 26·9)  | 21·9% (9·5 to 36·1)   |
|                           | Iran                         | 4·8% (-1·3 to 10·5)    | 10% (2·9 to 17)       | 9·6% (5·2 to 14·3)     | 23% (21 to 24·9)      | 22·4% (18·4 to 26·4)  |
|                           | Iraq                         | 18·7% (-1·4 to 44)     | 22·9% (1·8 to 48·6)   | 30·7% (24·2 to 37·4)   | 36·7% (32·2 to 42)    | 36·2% (22·1 to 49·7)  |
|                           | Jordan                       | 65% (39·7 to 95·6)     | 66% (37·8 to 99·4)    | 63·5% (52·5 to 75·4)   | 73·9% (65·9 to 81·6)  | 72·7% (53·6 to 94·3)  |
|                           | Kuwait                       | 46·8% (19·9 to 75)     | 54·3% (23·5 to 85·8)  | 46·8% (35·2 to 59·8)   | 58·7% (51·2 to 66·1)  | 59·3% (38·2 to 82·1)  |

**Table S32** Temporal changes in the number of DALYs, mortality, incidence, prevalence, and YLDs of neurological conditions in North Africa and Middle East and the world from 2010 to 2019

| Condition                | Location                     | DALYs                   | Deaths                 | Incidence              | Prevalence            | YLDs                  |
|--------------------------|------------------------------|-------------------------|------------------------|------------------------|-----------------------|-----------------------|
|                          | Lebanon                      | 7·9% (-6·8 to 24·4)     | 2·7% (-12·6 to 19·5)   | 26% (17·3 to 34·5)     | 29·5% (24·5 to 34·4)  | 28·9% (15 to 43·5)    |
|                          | Libya                        | 22·2% (-0·8 to 51·9)    | 35·5% (9·4 to 68·1)    | 36% (27·8 to 45·3)     | 32·8% (28·1 to 37·4)  | 32·1% (17·4 to 49·2)  |
|                          | Morocco                      | 2·9% (-15·7 to 27·5)    | 7·5% (-11·9 to 33·5)   | 11·8% (5·7 to 19)      | 15·5% (11·2 to 20·1)  | 15·3% (3·2 to 28·7)   |
|                          | Oman                         | -5·4% (-17·2 to 9·1)    | -8·8% (-20·6 to 4·6)   | 26·9% (18·1 to 35·9)   | 55·6% (48 to 64·2)    | 53·3% (34·1 to 74)    |
|                          | Palestine                    | -15·7% (-29·4 to -0·2)  | -23·2% (-36·1 to -8·6) | 5·1% (-1·5 to 11·9)    | 12% (4·2 to 18·5)     | 12% (-1·6 to 27·2)    |
|                          | Qatar                        | 24% (-1·8 to 52·7)      | 23·9% (-5·7 to 58·7)   | 47·3% (32 to 63·5)     | 56% (48·5 to 62·6)    | 56·4% (31·6 to 85·8)  |
|                          | Saudi Arabia                 | 19·9% (-3·7 to 48·8)    | 12·8% (-10·4 to 40)    | 32·2% (23·8 to 40·4)   | 46·8% (39·3 to 57·2)  | 45·4% (30·1 to 64·8)  |
|                          | Sudan                        | -7·4% (-25 to 13·2)     | -4·9% (-20·7 to 14·9)  | 11·9% (6·9 to 17·8)    | 19% (15·1 to 23·5)    | 18·9% (6·5 to 31·7)   |
|                          | Syrian Arab Republic         | 2·5% (-22·3 to 34·3)    | 16% (-11·8 to 50·8)    | -1·9% (-7·9 to 4·9)    | -7·7% (-11·5 to -2·7) | -7·6% (-16·8 to 3·4)  |
|                          | Tunisia                      | 3·3% (-19·7 to 32·8)    | 5·4% (-17·4 to 36·6)   | 20·4% (12·4 to 28·1)   | 19·1% (13·4 to 24·5)  | 19·1% (5·1 to 35·6)   |
|                          | Turkey                       | 1·4% (-19·4 to 26·9)    | 3·4% (-17·9 to 29·6)   | 24·5% (15·8 to 34·3)   | 19·1% (14·1 to 24·2)  | 19·4% (7·3 to 32·6)   |
|                          | United Arab Emirates         | 78·3% (36·3 to 129·8)   | 88% (40·5 to 143)      | 83·3% (65·8 to 102)    | 58·8% (49·8 to 67·7)  | 55·5% (29·4 to 86·8)  |
|                          | Yemen                        | 22·2% (0 to 47·9)       | 23·7% (2·8 to 49·2)    | 23·1% (17·5 to 29·2)   | 25·6% (20·7 to 30·6)  | 25·4% (11·8 to 39·4)  |
| Subarachnoid haemorrhage | Global                       | 7·6% (-1·3 to 18)       | 12·4% (2·1 to 24·4)    | 19·1% (15·8 to 22·3)   | 19·9% (18·6 to 21·1)  | 19·9% (18·1 to 21·6)  |
|                          | North Africa and Middle East | -3·8% (-17·1 to 10·3)   | 1·4% (-12·3 to 16·9)   | 27·8% (23 to 32·8)     | 28·4% (25·6 to 30·8)  | 28·1% (21·7 to 34·8)  |
|                          | Afghanistan                  | 8·5% (-13·4 to 42·6)    | 3% (-17·9 to 38·9)     | 24·2% (14·8 to 35·3)   | 38·4% (30·9 to 45·6)  | 37% (19·5 to 59·5)    |
|                          | Algeria                      | 3% (-18·6 to 30·5)      | 5·3% (-19·9 to 39·1)   | 29% (20·2 to 37·6)     | 26·4% (17·2 to 32·5)  | 26·5% (7·9 to 48·5)   |
|                          | Bahrain                      | 25·3% (2·7 to 52·6)     | 35·4% (6·8 to 70)      | 69·1% (49·7 to 91·5)   | 50·5% (41·6 to 59·8)  | 50% (27·1 to 76·9)    |
|                          | Egypt                        | -21·3% (-43·5 to 10·8)  | -13·9% (-36·6 to 17·3) | 21·2% (12·7 to 30)     | 21·2% (15·8 to 26·7)  | 21·5% (4·2 to 40·8)   |
|                          | Iran                         | 3·1% (-10·8 to 20·7)    | 2·3% (-14·3 to 22·6)   | 34·2% (28·3 to 41)     | 38% (33·6 to 41·8)    | 37·4% (30·7 to 44·3)  |
|                          | Iraq                         | -11·5% (-29·8 to 13·5)  | -12% (-32·3 to 16·5)   | 19% (10·6 to 28·9)     | 29% (23·5 to 35·5)    | 29% (11·2 to 49·6)    |
|                          | Jordan                       | 69·3% (44·6 to 98·2)    | 62·8% (31·4 to 101·5)  | 109·1% (88·6 to 129·2) | 94·6% (84·1 to 103·5) | 93·3% (64·8 to 125·3) |
|                          | Kuwait                       | 59·2% (34·7 to 85·3)    | 55·7% (26·2 to 88·5)   | 103·3% (81·9 to 128·8) | 87·8% (73·7 to 97·6)  | 88·1% (58·9 to 120·8) |
|                          | Lebanon                      | 12·1% (-5·4 to 31·7)    | 0·7% (-20·4 to 24·5)   | 50% (34·4 to 66·9)     | 40·1% (33·6 to 46·7)  | 39·9% (20·2 to 63·3)  |
|                          | Libya                        | 14·2% (-11·6 to 46·3)   | 30·2% (-2 to 72·1)     | 48·3% (36·9 to 61·6)   | 41·3% (32·7 to 48·9)  | 40·8% (19 to 66·9)    |
|                          | Morocco                      | -6·7% (-25·8 to 20·8)   | -2·1% (-23·2 to 31·6)  | 14·1% (6·2 to 23·3)    | 13% (0·8 to 18·9)     | 12·1% (-6·3 to 32·5)  |
|                          | Oman                         | 17·1% (-5·1 to 53·5)    | 8·8% (-11·5 to 46·1)   | 76·7% (62·5 to 93·2)   | 83·8% (73·4 to 93)    | 80·8% (57·6 to 107·5) |
|                          | Palestine                    | 15·9% (-5·3 to 40·3)    | 9·5% (-14·5 to 39·9)   | 46·3% (36·7 to 60·3)   | 40·1% (34·3 to 46·5)  | 40% (19 to 62·3)      |
|                          | Qatar                        | 43·4% (13·2 to 82·9)    | 44·9% (8·7 to 95)      | 62% (48·3 to 77·9)     | 61·2% (52·5 to 69·9)  | 63·2% (34·5 to 93·9)  |
|                          | Saudi Arabia                 | 26·5% (-3·3 to 62·7)    | 19·5% (-12·6 to 58·8)  | 64% (49·4 to 83·9)     | 60·2% (52·8 to 68·3)  | 58·5% (35·4 to 86·8)  |
|                          | Sudan                        | -6·7% (-28·1 to 26·5)   | -6·4% (-27·9 to 25·1)  | 20·2% (12·7 to 28·6)   | 26·6% (21·7 to 31·8)  | 26·7% (6·6 to 46)     |
|                          | Syrian Arab Republic         | -32·2% (-45·6 to -15·2) | -15% (-33·4 to 8·9)    | 5% (-4 to 15·8)        | -6·4% (-13·6 to -0·1) | -5·9% (-20·2 to 10·9) |
|                          | Tunisia                      | -0·5% (-23·7 to 28·5)   | 0·3% (-25·5 to 34·2)   | 28·5% (19·3 to 38)     | 21·4% (16 to 27)      | 21·5% (2·3 to 43·7)   |
|                          | Turkey                       | 2·8% (-19·7 to 31)      | 7·7% (-18·1 to 39·7)   | 21·1% (12·2 to 31·7)   | 17·8% (13 to 22·9)    | 17·9% (0·4 to 39·8)   |
|                          | United Arab Emirates         | 59·1% (17·3 to 114·4)   | 71·2% (18·9 to 138·6)  | 76·6% (53 to 100·7)    | 63·4% (49·5 to 77·3)  | 62·1% (38·1 to 92·2)  |
|                          | Yemen                        | 27·5% (-1·7 to 63·7)    | 30·5% (3 to 67)        | 31·4% (22·7 to 41·5)   | 36·4% (30·1 to 42·1)  | 36·5% (18·6 to 58·1)  |
| Neurological disorders†  | Global                       | 17·9% (14·1 to 23·8)    | 35·5% (28·6 to 40·9)   | 11·8% (10·7 to 13·1)   | 12·8% (11·9 to 13·7)  | 15·5% (13 to 21)      |
|                          | North Africa and Middle East | 19·6% (13·8 to 26·5)    | 32·9% (23·5 to 42·3)   | 18·7% (16·8 to 20·4)   | 20·1% (18·7 to 21·5)  | 19·4% (12·8 to 28·8)  |
|                          | Afghanistan                  | 29·4% (4·8 to 56·9)     | 17·3% (2·7 to 32·3)    | 34·5% (31·7 to 38·3)   | 36·6% (34·2 to 39·1)  | 37·6% (1·7 to 90·9)   |
|                          | Algeria                      | 19·3% (3·7 to 41·9)     | 46·9% (23·1 to 72·4)   | 15·1% (12·5 to 17·9)   | 15% (13·1 to 17·1)    | 16·3% (-2 to 49·3)    |
|                          | Bahrain                      | 22% (2·9 to 48·7)       | 65·9% (35·1 to 95·8)   | 15·9% (9·4 to 22·3)    | 18·1% (14 to 22·3)    | 18·6% (-3·3 to 48·3)  |
|                          | Egypt                        | 17·7% (-2·9 to 40·8)    | 27·8% (6·3 to 53·2)    | 20·4% (18·9 to 22·1)   | 19·7% (18·4 to 20·9)  | 16% (-12·4 to 43·8)   |
|                          | Iran                         | 16·2% (10·2 to 25·1)    | 48% (36·6 to 60·2)     | 12·5% (8·1 to 17·5)    | 13·4% (10·6 to 16·4)  | 13·5% (7·8 to 22·4)   |
|                          | Iraq                         | 30·1% (8·3 to 55·9)     | 36·9% (21·7 to 57)     | 26·5% (23·9 to 29)     | 29·9% (27·8 to 32·1)  | 31·9% (4·2 to 70·2)   |
|                          | Jordan                       | 71·1% (47·7 to 103·4)   | 98% (71·5 to 126·6)    | 64·1% (61·8 to 66·4)   | 66·9% (64·8 to 69·2)  | 68·7% (38·4 to 106·9) |
|                          | Kuwait                       | 54·5% (30·6 to 79)      | 67·1% (45 to 89·9)     | 50% (46·5 to 53·5)     | 53·4% (50·5 to 56·3)  | 55·2% (27·1 to 88·9)  |
|                          | Lebanon                      | 27·9% (14·7 to 44·8)    | 38·5% (26·5 to 50·5)   | 25·9% (23·2 to 28·3)   | 25·5% (23·8 to 27·3)  | 27·5% (8·4 to 53·6)   |
|                          | Libya                        | 19·3% (4·6 to 38·9)     | 39·9% (18·6 to 63·7)   | 12·9% (10 to 15·8)     | 16·2% (13·9 to 18·6)  | 16·2% (-0·5 to 40·5)  |
|                          | Morocco                      | 13·4% (-0·5 to 34)      | 21·6% (5·4 to 42·7)    | 9·9% (8·4 to 11·7)     | 11·3% (9·8 to 12·8)   | 12% (-6·1 to 40·3)    |
|                          | Oman                         | 56·8% (30·3 to 84·7)    | 12·4% (3·5 to 24·2)    | 65·1% (58·2 to 72)     | 66·9% (62·1 to 71·5)  | 63·4% (32·7 to 103·6) |

**Table S32** Temporal changes in the number of DALYs, mortality, incidence, prevalence, and YLDs of neurological conditions in North Africa and Middle East and the world from 2010 to 2019

| Condition                               | Location                     | DALYs                        | Deaths                  | Incidence               | Prevalence              | YLDs                    |                      |
|-----------------------------------------|------------------------------|------------------------------|-------------------------|-------------------------|-------------------------|-------------------------|----------------------|
|                                         | Palestine                    | 26·8% (7·2 to 55·5)          | 35·6% (20 to 53·2)      | 23·8% (22·1 to 25·6)    | 25·7% (24·1 to 27·4)    | 26·4% (2 to 68·2)       |                      |
|                                         | Qatar                        | 65·2% (37·9 to 96·7)         | 72·1% (34·4 to 115)     | 65·7% (63·2 to 68·3)    | 65·3% (63·4 to 67·3)    | 66% (33·9 to 102·2)     |                      |
|                                         | Saudi Arabia                 | 30·5% (5·2 to 58·6)          | 25·7% (7·5 to 46·1)     | 30·2% (26·6 to 34·2)    | 34% (30·7 to 37·2)      | 32·1% (-1 to 73·6)      |                      |
|                                         | Sudan                        | 21·4% (-1·9 to 42·7)         | 15·2% (1·3 to 32·7)     | 25·3% (24·1 to 26·6)    | 27·6% (26·2 to 28·9)    | 27·2% (-1·3 to 63·7)    |                      |
|                                         | Syrian Arab Republic         | -17% (-28·7 to 4·6)          | 23·2% (-1·2 to 48·7)    | -27·6% (-30·5 to -24·5) | -24·3% (-26·5 to -22·3) | -22·3% (-35·2 to -1·8)  |                      |
|                                         | Tunisia                      | 14·7% (3·1 to 33·4)          | 35·5% (11·7 to 65)      | 7·8% (5·7 to 10·3)      | 8·4% (6·6 to 10·2)      | 10·9% (-2·3 to 35)      |                      |
|                                         | Turkey                       | 15·7% (-0·7 to 35·5)         | 28·2% (6·4 to 52·9)     | 16·1% (12 to 21·5)      | 19·6% (15·1 to 24·6)    | 17·1% (-5·2 to 49·8)    |                      |
|                                         | United Arab Emirates         | 15·5% (-3·3 to 48·6)         | 75·7% (38·3 to 119·2)   | 9·3% (-1·7 to 20·3)     | 10·2% (3·4 to 17·6)     | 9·4% (-13·9 to 43·4)    |                      |
|                                         | Yemen                        | 28·7% (5·2 to 54·4)          | 35·9% (18·3 to 53·7)    | 31·1% (29·6 to 32·9)    | 32·8% (31·2 to 34·5)    | 30·5% (1·4 to 68·2)     |                      |
| Alzheimer's disease and other dementias | Global                       | 36·3% (31·9 to 40·8)         | 40·3% (35 to 46·2)      | 37·2% (34·6 to 39·6)    | 39·1% (36·6 to 41·4)    | 39·3% (36·7 to 41·8)    |                      |
|                                         | North Africa and Middle East | 34·5% (28·5 to 41·2)         | 36·4% (28·2 to 46·7)    | 38% (34·6 to 41·1)      | 38·6% (35·2 to 41·7)    | 38·4% (34·9 to 41·9)    |                      |
|                                         | Afghanistan                  | 20·3% (8·7 to 32·6)          | 20·2% (4·8 to 35·1)     | 22·9% (18·1 to 28·4)    | 21·6% (16·6 to 26·6)    | 21·2% (15·1 to 27·5)    |                      |
|                                         | Algeria                      | 47·4% (30·3 to 66·4)         | 53·2% (28·9 to 80·6)    | 47·9% (41·2 to 54·8)    | 48·7% (42·6 to 55·8)    | 49·4% (41·7 to 57·9)    |                      |
|                                         | Bahrain                      | 94% (71·2 to 120·2)          | 91·7% (62·8 to 124·1)   | 102·1% (91·2 to 114·3)  | 104·9% (95·4 to 115·1)  | 103·5% (89·4 to 117·8)  |                      |
|                                         | Egypt                        | 29·3% (13·6 to 46·7)         | 26·6% (5·7 to 49·9)     | 32·1% (28 to 36·5)      | 31·9% (27·6 to 36·4)    | 30·8% (24·4 to 37·5)    |                      |
|                                         | Iran                         | 45% (39·6 to 53·4)           | 55·3% (47·2 to 69)      | 45·3% (39·8 to 50·9)    | 47·1% (43·3 to 51·2)    | 48% (43·4 to 53)        |                      |
|                                         | Iraq                         | 43·8% (31·9 to 58·8)         | 40% (26 to 60·5)        | 47·7% (43·1 to 52·9)    | 47·8% (42·1 to 54·1)    | 47·2% (40·2 to 54·2)    |                      |
|                                         | Jordan                       | 103·9% (83·7 to 126)         | 105·3% (79·2 to 136·3)  | 105% (96·6 to 113·6)    | 105·7% (97·4 to 114·3)  | 106·6% (95·5 to 118·6)  |                      |
|                                         | Kuwait                       | 68·6% (53·8 to 86)           | 73·9% (54·5 to 97·8)    | 70·2% (60·2 to 79·2)    | 70·2% (62·7 to 78·2)    | 69·4% (59·6 to 78·9)    |                      |
|                                         | Lebanon                      | 32·5% (23·8 to 41·7)         | 42% (29·5 to 56·6)      | 32·7% (27·2 to 39·1)    | 34·3% (28·6 to 40·3)    | 35·2% (28·8 to 42·3)    |                      |
|                                         | Libya                        | 43·9% (27·3 to 62·4)         | 42·7% (22·9 to 65·8)    | 46·8% (41·3 to 52·7)    | 45·4% (39·8 to 51)      | 45·2% (38·2 to 52)      |                      |
|                                         | Morocco                      | 21·8% (9·3 to 37·2)          | 18·2% (0·3 to 39)       | 23·7% (19·3 to 29)      | 23·9% (19 to 29·6)      | 22% (16 to 28·6)        |                      |
|                                         | Oman                         | 22·6% (13·2 to 32·7)         | 10·6% (0·5 to 22·2)     | 36·2% (29 to 42·9)      | 32·9% (26·6 to 39·9)    | 28·4% (19·9 to 37·6)    |                      |
|                                         | Palestine                    | 34·8% (23·2 to 48·9)         | 34·9% (19·5 to 53·9)    | 36·4% (31 to 41·7)      | 36·6% (31·2 to 41·8)    | 35·5% (28·1 to 42·9)    |                      |
|                                         | Qatar                        | 116·8% (80·1 to 157·1)       | 100·7% (58·1 to 150·9)  | 125·6% (112·7 to 140·5) | 133·9% (121·7 to 148·8) | 129·9% (107·1 to 152·6) |                      |
|                                         | Saudi Arabia                 | 33·5% (20·8 to 47·5)         | 28·5% (12·3 to 46·7)    | 40·2% (34·2 to 45·9)    | 38·5% (32 to 44·7)      | 36·1% (28·1 to 44·9)    |                      |
|                                         | Sudan                        | 20·1% (10·9 to 32·6)         | 16·8% (5 to 33)         | 23% (18·5 to 27·7)      | 23% (18 to 27·7)        | 21·7% (15·8 to 27·7)    |                      |
|                                         | Syrian Arab Republic         | 28·8% (11·3 to 49·5)         | 29·3% (6·4 to 55·6)     | 29·9% (24·6 to 34·7)    | 30·2% (24·9 to 35·7)    | 28·3% (21·8 to 35·4)    |                      |
|                                         | Tunisia                      | 37·1% (19·4 to 58·6)         | 39·5% (17·3 to 70·1)    | 38·5% (33·1 to 43·6)    | 39·6% (34·8 to 44·8)    | 39·7% (33·2 to 46·7)    |                      |
|                                         | Turkey                       | 28·3% (12·2 to 47)           | 31·4% (11·1 to 57·7)    | 36·1% (30·8 to 41·3)    | 36·8% (31·3 to 42)      | 37·7% (30·7 to 44·2)    |                      |
|                                         | United Arab Emirates         | 158·3% (124·6 to 197·8)      | 139·8% (103·9 to 186·3) | 168·4% (153·3 to 184·4) | 170·1% (155·7 to 184·7) | 165·7% (139·7 to 194·8) |                      |
|                                         | Yemen                        | 40·2% (28·8 to 53·4)         | 40·9% (25·8 to 58·2)    | 40·3% (34·8 to 45·1)    | 39·5% (33·8 to 44·7)    | 38·9% (31·6 to 45·7)    |                      |
|                                         | Parkinson's disease          | Global                       | 28·1% (22·7 to 33·1)    | 31·3% (25·4 to 36·9)    | 38·4% (33·5 to 43)      | 30·9% (26·9 to 34·6)    | 30·6% (26·5 to 34·8) |
|                                         |                              | North Africa and Middle East | 34·5% (26·3 to 43·9)    | 34·5% (26 to 44·9)      | 39·5% (35·1 to 45)      | 41·1% (35 to 48·9)      | 40·9% (33·1 to 49·9) |
|                                         |                              | Afghanistan                  | 25% (7·9 to 43·8)       | 20·3% (3·6 to 38·5)     | 25·2% (15·2 to 35·7)    | 27·8% (11·9 to 43·1)    | 28·8% (7·8 to 53·5)  |
|                                         |                              | Algeria                      | 39·4% (18·4 to 62·2)    | 46·3% (22·2 to 72·3)    | 43·8% (31·7 to 61·4)    | 46·8% (29·9 to 70)      | 45·7% (23·5 to 73·4) |
| Bahrain                                 |                              | 64·5% (39·5 to 91·8)         | 60% (33·7 to 91·2)      | 90·1% (69·6 to 119·1)   | 95·5% (72·2 to 127·4)   | 94·1% (62·8 to 136·8)   |                      |
| Egypt                                   |                              | 33·1% (9·4 to 60·8)          | 32% (6·9 to 60·3)       | 35·2% (22·8 to 50·4)    | 35·7% (18·5 to 56·7)    | 35% (12·3 to 62·6)      |                      |
| Iran                                    |                              | 35·9% (28·4 to 46·7)         | 40·6% (31·2 to 54·4)    | 34·6% (25·6 to 43·4)    | 39·4% (32·6 to 47·3)    | 39·2% (31·8 to 48·7)    |                      |
| Iraq                                    |                              | 51·6% (31·3 to 75·3)         | 53·7% (32·7 to 79·2)    | 47·2% (36 to 59·1)      | 49·6% (34·6 to 64·8)    | 49·6% (26·9 to 75·7)    |                      |
| Jordan                                  |                              | 99% (72·9 to 128·1)          | 95·4% (66·9 to 127·4)   | 109·7% (89·1 to 134·3)  | 120·7% (92·4 to 155·2)  | 119·6% (83·1 to 166·1)  |                      |
| Kuwait                                  |                              | 53·1% (33·8 to 75·7)         | 50·4% (27·9 to 76·5)    | 61·8% (44·1 to 81·5)    | 69·4% (48·1 to 91·6)    | 70·1% (40·4 to 100·2)   |                      |
| Lebanon                                 |                              | 22·4% (10·2 to 35·7)         | 25·1% (12·1 to 39·9)    | 27·1% (12·3 to 42·1)    | 28% (11·4 to 47)        | 27% (6·2 to 50·4)       |                      |
| Libya                                   |                              | 45·9% (22·5 to 75·5)         | 42·7% (18·5 to 72·3)    | 44·6% (32·7 to 57·7)    | 44·8% (28·2 to 63·4)    | 44·6% (23·9 to 69·6)    |                      |
| Morocco                                 |                              | 41·7% (21·9 to 66·3)         | 42·7% (21 to 69)        | 33·4% (22·5 to 45·7)    | 37·2% (21·9 to 54·5)    | 36·9% (15·2 to 61·9)    |                      |
| Oman                                    |                              | 14·6% (2·9 to 28·4)          | 9·9% (-1·6 to 23·1)     | 52·1% (37·3 to 70·9)    | 50·1% (30·6 to 72·6)    | 52·5% (27·7 to 81·4)    |                      |
| Palestine                               |                              | 43·1% (25·2 to 62·1)         | 44·1% (25 to 66·1)      | 38·2% (23·7 to 53)      | 39·8% (21·6 to 58·7)    | 39·6% (16·4 to 68·4)    |                      |

**Table S32** Temporal changes in the number of DALYs, mortality, incidence, prevalence, and YLDs of neurological conditions in North Africa and Middle East and the world from 2010 to 2019

| Condition           | Location                     | DALYs                  | Deaths                 | Incidence               | Prevalence              | YLDs                    |
|---------------------|------------------------------|------------------------|------------------------|-------------------------|-------------------------|-------------------------|
|                     | Qatar                        | 74.1% (44.1 to 109.4)  | 69.7% (34.9 to 112.6)  | 103.4% (81.9 to 127)    | 105.5% (81.7 to 131.3)  | 102.9% (68.2 to 148.5)  |
|                     | Saudi Arabia                 | 29.1% (12.7 to 45.9)   | 17.4% (1.8 to 33.6)    | 56.5% (42.3 to 71.5)    | 56.4% (39.2 to 75.1)    | 57% (32 to 85.2)        |
|                     | Sudan                        | 28.2% (12.5 to 48.5)   | 26.5% (10.3 to 46.8)   | 27.6% (15.7 to 41.3)    | 29.2% (13.1 to 49.2)    | 29.6% (8 to 57.4)       |
|                     | Syrian Arab Republic         | 25.1% (1.4 to 53.7)    | 23.8% (-2 to 53.7)     | 24% (11.1 to 38.1)      | 25.7% (8.9 to 43.7)     | 24% (3.2 to 49.9)       |
|                     | Tunisia                      | 28.7% (7.2 to 56.5)    | 28.3% (5.3 to 60)      | 35% (18.8 to 50.6)      | 39.1% (18.3 to 59.4)    | 38.4% (14.2 to 65.4)    |
|                     | Turkey                       | 26.8% (6.1 to 51.1)    | 27.2% (3.8 to 53.4)    | 42.1% (30.3 to 55)      | 40.8% (25.3 to 56.1)    | 40.7% (20 to 63.7)      |
|                     | United Arab Emirates         | 133% (94.7 to 183.5)   | 100.9% (66.3 to 147.7) | 140.3% (113.2 to 170.6) | 153.1% (119.2 to 191.9) | 150.4% (97.7 to 226)    |
|                     | Yemen                        | 42.9% (24.9 to 63.8)   | 42.7% (23.4 to 65.3)   | 38.7% (26.4 to 53.3)    | 38.2% (21.7 to 57.4)    | 37.8% (14.2 to 65.3)    |
| Idiopathic epilepsy | Global                       | 4.8% (-2.4 to 13.5)    | 4.7% (-2.8 to 15.8)    | 12.9% (2.8 to 23.4)     | 14.5% (4.7 to 24.6)     | 11.9% (0.8 to 24.2)     |
|                     | North Africa and Middle East | 2% (-17.4 to 25.6)     | 0.3% (-10.2 to 13.5)   | 12.8% (-13.9 to 46.5)   | 14.8% (-13.6 to 51.6)   | 9.3% (-22.9 to 54.1)    |
|                     | Afghanistan                  | 13.1% (-32.8 to 102)   | 6.2% (-14 to 36.8)     | 38% (-76.4 to 664.9)    | 39.5% (-75.9 to 692.9)  | 33.7% (-77.1 to 713.8)  |
|                     | Algeria                      | 2.2% (-52 to 113.2)    | 1.8% (-16.5 to 25.1)   | 15.3% (-68.8 to 336)    | 15.4% (-69.2 to 335.9)  | 7.7% (-74 to 377.1)     |
|                     | Bahrain                      | 5.6% (-53 to 123.2)    | 16.2% (-5.9 to 41.6)   | 8.3% (-66.1 to 272.2)   | 10.9% (-65.9 to 282.4)  | 6.8% (-74.7 to 337)     |
|                     | Egypt                        | -4% (-66.6 to 169.5)   | 7.9% (-18.5 to 38.7)   | 0% (-74.7 to 334.7)     | -1.3% (-75.4 to 328.2)  | -5.7% (-78.4 to 308.5)  |
|                     | Iran                         | -7.3% (-23.4 to 13.7)  | -15.9% (-23 to -2.2)   | 11.1% (-13.2 to 43.4)   | 11% (-13.1 to 43.2)     | 5.6% (-20.2 to 40.4)    |
|                     | Iraq                         | 11.9% (-56.5 to 154.3) | -6% (-23.4 to 17.4)    | 27.9% (-69.7 to 437.6)  | 34.5% (-67.8 to 446.3)  | 27.6% (-77.5 to 541.4)  |
|                     | Jordan                       | 61.7% (-34.5 to 299.1) | 57.6% (32 to 88.5)     | 59.6% (-57.6 to 497.6)  | 68.4% (-53.6 to 525.2)  | 65.9% (-61.1 to 578.8)  |
|                     | Kuwait                       | 28.3% (-47.2 to 197.8) | 26.2% (4.7 to 54.4)    | 37% (-59.7 to 374.5)    | 36% (-60.1 to 380.9)    | 32.1% (-66.9 to 456.1)  |
|                     | Lebanon                      | 23.3% (-44.6 to 181.9) | 18.9% (-1.1 to 41.5)   | 27.4% (-63 to 337.3)    | 28.2% (-62.2 to 339.9)  | 27.4% (-67.6 to 436.1)  |
|                     | Libya                        | -5.7% (-52 to 96.7)    | 5.3% (-15.7 to 31.5)   | -4.9% (-69.5 to 231.4)  | -3.7% (-70.3 to 231.2)  | -4.7% (-74.8 to 304)    |
|                     | Morocco                      | -0.2% (-61.6 to 151.5) | -5.3% (-25.2 to 16.9)  | 8.6% (-75.9 to 335.9)   | 14.8% (-74.9 to 341.8)  | 8.1% (-77.6 to 362.3)   |
|                     | Oman                         | 47.8% (-54.3 to 337.5) | 13.1% (-6 to 49.9)     | 57.7% (-52 to 500.1)    | 60.6% (-50.6 to 497.2)  | 56% (-64.9 to 555.8)    |
|                     | Palestine                    | 18.8% (-39.8 to 149.1) | 27.4% (3.1 to 51.3)    | 18.6% (-69.3 to 391.5)  | 23.7% (-68.6 to 419.7)  | 18.9% (-71.1 to 445.8)  |
|                     | Qatar                        | 50.7% (-48.1 to 294.7) | 32.1% (3.4 to 68.8)    | 63.6% (-53 to 470)      | 63% (-54.7 to 444.3)    | 57.1% (-64.9 to 564.7)  |
|                     | Saudi Arabia                 | 14.9% (-43.3 to 139.8) | 19.1% (-10.8 to 56.7)  | 23.1% (-62.5 to 315.9)  | 25.2% (-61 to 319.2)    | 15.7% (-73.2 to 344.6)  |
|                     | Sudan                        | -1% (-45 to 86.3)      | -8% (-30.2 to 28.6)    | 22.5% (-71.4 to 419.5)  | 25.7% (-70.4 to 431.3)  | 18.3% (-73.7 to 414)    |
|                     | Syrian Arab Republic         | -30.5% (-73.7 to 82.4) | -20.8% (-38.8 to 5.2)  | -35.8% (-82.1 to 180)   | -29% (-81 to 218.1)     | -30.4% (-84.2 to 227.4) |
|                     | Tunisia                      | -1.8% (-53.5 to 116.1) | -4% (-25.4 to 24.5)    | 8% (-72.1 to 297.2)     | 12.9% (-70.4 to 322.6)  | 7.2% (-73.2 to 369.4)   |
|                     | Turkey                       | -1.8% (-51.5 to 93.4)  | -3.9% (-22.3 to 18.3)  | 11.5% (-66.8 to 271.9)  | 16.3% (-65.3 to 285.6)  | 10.7% (-72.4 to 317.8)  |
|                     | United Arab Emirates         | 0.8% (-51.5 to 107.4)  | 25.1% (-7.9 to 67.4)   | 5.6% (-68.3 to 248.8)   | 0.3% (-69.1 to 237.6)   | -4% (-73.8 to 261.9)    |
|                     | Yemen                        | 6.4% (-46.7 to 112.2)  | 11.6% (-12.4 to 45.2)  | 13.3% (-74.4 to 470.2)  | 13.1% (-74.9 to 465)    | 9.6% (-75.5 to 487)     |
| Multiple sclerosis  | Global                       | 14.3% (9.6 to 18.9)    | 17.8% (11.3 to 23.7)   | 10.3% (8.2 to 12.3)     | 15.8% (13.7 to 17.7)    | 15.5% (12.7 to 18)      |
|                     | North Africa and Middle East | 30.8% (10.1 to 52.4)   | 32.4% (8.6 to 58.8)    | 22% (18 to 25.6)        | 36.6% (34 to 39.2)      | 35.9% (29.6 to 42.2)    |
|                     | Afghanistan                  | 41.2% (5 to 88.3)      | 36.9% (3.2 to 93.1)    | 52.9% (44 to 63.7)      | 51.4% (43.2 to 60.8)    | 51% (23.1 to 82.3)      |
|                     | Algeria                      | 32.4% (11.6 to 55.5)   | 32.7% (4.5 to 67)      | 16.5% (8.3 to 24.3)     | 38.1% (30.5 to 46.9)    | 37.1% (13.1 to 64.4)    |
|                     | Bahrain                      | 55.2% (32.6 to 81.6)   | 65.9% (28.9 to 104.3)  | 13.4% (2.8 to 26.3)     | 55.8% (46.1 to 66.1)    | 53.6% (25.4 to 89)      |
|                     | Egypt                        | 20.9% (-49.6 to 173.1) | 21.6% (-54.1 to 169.2) | 28.4% (21.4 to 34.9)    | 38% (31 to 45.2)        | 37.3% (19.8 to 60.8)    |
|                     | Iran                         | 29.7% (21.7 to 37.4)   | 34.4% (21 to 47.7)     | 12.9% (5 to 20)         | 34.5% (30.7 to 38.1)    | 33.4% (25.9 to 40.4)    |
|                     | Iraq                         | 46.7% (26.8 to 69.5)   | 37.1% (8.1 to 75.4)    | 48.2% (41.3 to 56.8)    | 56.7% (50.2 to 64.4)    | 55.2% (31 to 82.3)      |
|                     | Jordan                       | 81.8% (57.5 to 109)    | 77.4% (45.6 to 123.3)  | 67.2% (58.6 to 76.6)    | 89.2% (78.5 to 100.1)   | 88.2% (56.6 to 125.5)   |
|                     | Kuwait                       | 80.7% (54.5 to 108.9)  | 83.3% (48.6 to 123.9)  | 52.8% (43 to 62.2)      | 82.9% (73.1 to 92.6)    | 80.5% (49.1 to 117.1)   |
|                     | Lebanon                      | 38.9% (19.6 to 60)     | 36.6% (10.1 to 69.5)   | 34.8% (24.7 to 45.8)    | 38.3% (29.6 to 47.5)    | 38.1% (16.7 to 64.5)    |
|                     | Libya                        | 36.5% (15.2 to 61.8)   | 44.2% (13.1 to 82.9)   | 13.2% (5.5 to 20.1)     | 37.9% (29.4 to 46)      | 36.8% (13.6 to 65.5)    |
|                     | Morocco                      | 23.6% (1.7 to 46.9)    | 26.3% (-1 to 65.6)     | 16.6% (10.7 to 22.5)    | 31.6% (24.4 to 39.1)    | 30.7% (9.9 to 56.4)     |
|                     | Oman                         | 65.5% (36.6 to 102.5)  | 37.5% (7.4 to 88.5)    | 85.3% (69.2 to 99.4)    | 95.9% (84.8 to 107.3)   | 95% (62.7 to 131.7)     |
|                     | Palestine                    | 43.9% (23.2 to 69.2)   | 46.9% (14.7 to 90.9)   | 36.1% (29.3 to 43.6)    | 44.8% (38.1 to 52.2)    | 43.1% (21.9 to 68.4)    |
|                     | Qatar                        | 72.4% (44.8 to 104.3)  | 61.9% (21.4 to 109.7)  | 64.3% (55.6 to 72.8)    | 76.9% (69.9 to 84.6)    | 74.9% (43.9 to 111.6)   |
|                     | Saudi Arabia                 | 66.7% (41.4 to 94.8)   | 63.2% (22.4 to 114)    | 49.3% (39 to 57.8)      | 70.9% (61.1 to 79.3)    | 67.7% (40.7 to 99)      |
|                     | Sudan                        | 37.4% (3.6 to 77.8)    | 36.4% (0.6 to 91)      | 37.6% (30.6 to 43.5)    | 43.2% (36.3 to 49.4)    | 41.4% (20.7 to 66)      |



**Table S32** Temporal changes in the number of DALYs, mortality, incidence, prevalence, and YLDs of neurological conditions in North Africa and Middle East and the world from 2010 to 2019

| Condition            | Location                     | DALYs                        | Deaths                | Incidence               | Prevalence              | YLDs                    |                      |
|----------------------|------------------------------|------------------------------|-----------------------|-------------------------|-------------------------|-------------------------|----------------------|
|                      | Syrian Arab Republic         | -0.6% (-1.6 to 17.3)         | 14.7% (-16.1 to 57.5) | -28.4% (-33.5 to -22)   | -0.5% (-6.7 to 5.4)     | -2.7% (-19.1 to 16.5)   |                      |
|                      | Tunisia                      | 24.8% (6.8 to 46.7)          | 25% (-5.1 to 64.2)    | 8.7% (1.4 to 15.8)      | 29.6% (22 to 37.2)      | 28.9% (9.1 to 54)       |                      |
|                      | Turkey                       | 18.3% (-10.8 to 43.2)        | 19.6% (-16.5 to 63.3) | 11.3% (8.3 to 14.4)     | 22% (19.1 to 25.2)      | 22.2% (3 to 42.3)       |                      |
|                      | United Arab Emirates         | 72.8% (38.7 to 115)          | 95.1% (43.9 to 155.9) | 6.7% (-13.5 to 29)      | 60.4% (46.5 to 76.6)    | 57.7% (27.5 to 97)      |                      |
|                      | Yemen                        | 48.8% (11.9 to 87.9)         | 51.3% (12.2 to 99.3)  | 37.9% (30 to 45.4)      | 48.2% (40.4 to 57.1)    | 47.5% (23.9 to 74.1)    |                      |
| Headache disorders‡  | Global                       | 12.2% (10.8 to 14.2)         | 0% (0 to 0)           | 11.6% (10.5 to 12.9)    | 12.4% (11.5 to 13.4)    | 12.2% (10.8 to 14.2)    |                      |
|                      | North Africa and Middle East | 19% (16.7 to 24)             | 0% (0 to 0)           | 18.6% (16.7 to 20.4)    | 20% (18.6 to 21.4)      | 19% (16.7 to 24)        |                      |
|                      | Afghanistan                  | 38% (33.1 to 45.4)           | 0% (0 to 0)           | 34.5% (31.7 to 38.1)    | 36.6% (34.4 to 38.8)    | 38% (33.1 to 45.4)      |                      |
|                      | Algeria                      | 14.3% (10.3 to 21)           | 0% (0 to 0)           | 14.9% (12.3 to 17.7)    | 14.8% (12.9 to 16.8)    | 14.3% (10.3 to 21)      |                      |
|                      | Bahrain                      | 17.2% (11.4 to 27.8)         | 0% (0 to 0)           | 15.7% (9.2 to 22.2)     | 17.8% (13.6 to 21.9)    | 17.2% (11.4 to 27.8)    |                      |
|                      | Egypt                        | 18.6% (15.1 to 23)           | 0% (0 to 0)           | 20.5% (19 to 22)        | 19.7% (18.7 to 20.9)    | 18.6% (15.1 to 23)      |                      |
|                      | Iran                         | 11% (6.9 to 17.3)            | 0% (0 to 0)           | 12.3% (7.8 to 17.3)     | 13.2% (10.4 to 16.2)    | 11% (6.9 to 17.3)       |                      |
|                      | Iraq                         | 30.9% (27 to 38.1)           | 0% (0 to 0)           | 26.4% (24 to 28.9)      | 29.8% (27.8 to 31.6)    | 30.9% (27 to 38.1)      |                      |
|                      | Jordan                       | 65.9% (61.1 to 73.5)         | 0% (0 to 0)           | 63.9% (61.7 to 66.1)    | 66.7% (64.9 to 68.8)    | 65.9% (61.1 to 73.5)    |                      |
|                      | Kuwait                       | 57.2% (51.7 to 65)           | 0% (0 to 0)           | 49.9% (46.4 to 53.4)    | 53.4% (50.7 to 56.3)    | 57.2% (51.7 to 65)      |                      |
|                      | Lebanon                      | 25.6% (22 to 30.1)           | 0% (0 to 0)           | 25.8% (23.1 to 28.2)    | 25.4% (23.8 to 27.1)    | 25.6% (22 to 30.1)      |                      |
|                      | Libya                        | 16.7% (12.6 to 24.8)         | 0% (0 to 0)           | 12.8% (10 to 15.6)      | 16.1% (13.8 to 18.5)    | 16.7% (12.6 to 24.8)    |                      |
|                      | Morocco                      | 10.8% (7.8 to 16.2)          | 0% (0 to 0)           | 9.8% (8.4 to 11.6)      | 11.1% (9.8 to 12.5)     | 10.8% (7.8 to 16.2)     |                      |
|                      | Oman                         | 65.1% (57.4 to 79.1)         | 0% (0 to 0)           | 65.2% (58.3 to 71.8)    | 67% (62.3 to 71.6)      | 65.1% (57.4 to 79.1)    |                      |
|                      | Palestine                    | 26.5% (22.5 to 32.6)         | 0% (0 to 0)           | 23.7% (22.3 to 25.4)    | 25.7% (24.3 to 27.1)    | 26.5% (22.5 to 32.6)    |                      |
|                      | Qatar                        | 65.6% (59.4 to 72.1)         | 0% (0 to 0)           | 65.6% (63.2 to 68.1)    | 65.2% (63.5 to 66.9)    | 65.6% (59.4 to 72.1)    |                      |
|                      | Saudi Arabia                 | 35.6% (30 to 46.6)           | 0% (0 to 0)           | 30.2% (26.6 to 34)      | 34.1% (31 to 37)        | 35.6% (30 to 46.6)      |                      |
|                      | Sudan                        | 28.5% (24.6 to 33.7)         | 0% (0 to 0)           | 25.4% (24.3 to 26.5)    | 27.6% (26.6 to 28.7)    | 28.5% (24.6 to 33.7)    |                      |
|                      | Syrian Arab Republic         | -24.6% (-27.7 to -18.5)      | 0% (0 to 0)           | -27.8% (-30.7 to -24.7) | -24.6% (-26.7 to -22.6) | -24.6% (-27.7 to -18.5) |                      |
|                      | Tunisia                      | 7.1% (3.5 to 13)             | 0% (0 to 0)           | 7.6% (5.4 to 10)        | 8% (6.3 to 9.7)         | 7.1% (3.5 to 13)        |                      |
|                      | Turkey                       | 15% (6.2 to 27.5)            | 0% (0 to 0)           | 15.9% (11.9 to 21.3)    | 19.5% (14.8 to 24.4)    | 15% (6.2 to 27.5)       |                      |
|                      | United Arab Emirates         | 10.2% (1.3 to 25.8)          | 0% (0 to 0)           | 9.2% (-1.9 to 20.2)     | 10.1% (3.2 to 17.7)     | 10.2% (1.3 to 25.8)     |                      |
|                      | Yemen                        | 33.4% (29.1 to 39)           | 0% (0 to 0)           | 31.2% (29.8 to 32.7)    | 32.9% (31.7 to 34.2)    | 33.4% (29.1 to 39)      |                      |
|                      | Migraine                     | Global                       | 12.1% (10.6 to 14.1)  | 0% (0 to 0)             | 8.7% (7.5 to 9.9)       | 12.3% (10.8 to 13.8)    | 12.1% (10.6 to 14.1) |
|                      |                              | North Africa and Middle East | 18.7% (16.4 to 24)    | 0% (0 to 0)             | 13.7% (12.1 to 15.4)    | 18.6% (16.6 to 20.5)    | 18.7% (16.4 to 24)   |
|                      |                              | Afghanistan                  | 37.9% (32.8 to 45.4)  | 0% (0 to 0)             | 32% (28.8 to 35.7)      | 37.3% (35.5 to 39.3)    | 37.9% (32.8 to 45.4) |
| Algeria              |                              | 13.9% (9.7 to 21.2)          | 0% (0 to 0)           | 12% (8.5 to 15.6)       | 13.8% (11.3 to 16.3)    | 13.9% (9.7 to 21.2)     |                      |
| Bahrain              |                              | 16.6% (10.6 to 28)           | 0% (0 to 0)           | 7.6% (0.5 to 15.1)      | 16.1% (11.7 to 21)      | 16.6% (10.6 to 28)      |                      |
| Egypt                |                              | 18.4% (14.6 to 23.4)         | 0% (0 to 0)           | 20.3% (18 to 22.3)      | 18.3% (17.4 to 19.2)    | 18.4% (14.6 to 23.4)    |                      |
| Iran                 |                              | 10.5% (6.3 to 17.4)          | 0% (0 to 0)           | 5.4% (0.2 to 10.4)      | 10.2% (5.9 to 14.6)     | 10.5% (6.3 to 17.4)     |                      |
| Iraq                 |                              | 30.5% (26.3 to 38)           | 0% (0 to 0)           | 20.8% (17.5 to 24)      | 30.4% (27.9 to 32.5)    | 30.5% (26.3 to 38)      |                      |
| Jordan               |                              | 65.5% (60.2 to 74.2)         | 0% (0 to 0)           | 56.9% (54.8 to 59)      | 65.3% (63.4 to 67.5)    | 65.5% (60.2 to 74.2)    |                      |
| Kuwait               |                              | 57% (51 to 65.2)             | 0% (0 to 0)           | 47.8% (43 to 53)        | 56.8% (53 to 60.7)      | 57% (51 to 65.2)        |                      |
| Lebanon              |                              | 25.5% (21.5 to 30.4)         | 0% (0 to 0)           | 26.3% (23 to 29.5)      | 25.4% (23.6 to 27.1)    | 25.5% (21.5 to 30.4)    |                      |
| Libya                |                              | 16.2% (11.9 to 25.5)         | 0% (0 to 0)           | 5.4% (2.6 to 8.6)       | 16% (13.3 to 19.1)      | 16.2% (11.9 to 25.5)    |                      |
| Morocco              |                              | 10.5% (7.3 to 16.8)          | 0% (0 to 0)           | 5.1% (3.8 to 6.5)       | 10.3% (8.7 to 11.8)     | 10.5% (7.3 to 16.8)     |                      |
| Oman                 |                              | 64.2% (56.3 to 79.3)         | 0% (0 to 0)           | 52.1% (45.8 to 59)      | 63.5% (58.3 to 68.3)    | 64.2% (56.3 to 79.3)    |                      |
| Palestine            |                              | 26.2% (21.8 to 33)           | 0% (0 to 0)           | 20.6% (19 to 22.4)      | 25.8% (24.2 to 27.3)    | 26.2% (21.8 to 33)      |                      |
| Qatar                |                              | 65.6% (58.9 to 72.9)         | 0% (0 to 0)           | 66.6% (63.8 to 69.1)    | 65.9% (64.8 to 67.1)    | 65.6% (58.9 to 72.9)    |                      |
| Saudi Arabia         |                              | 35% (29.1 to 47.1)           | 0% (0 to 0)           | 21.8% (17.2 to 26.4)    | 34.7% (30.7 to 38.4)    | 35% (29.1 to 47.1)      |                      |
| Sudan                |                              | 28.3% (24.2 to 34.2)         | 0% (0 to 0)           | 22.7% (20.9 to 24.2)    | 28.2% (27.1 to 29.2)    | 28.3% (24.2 to 34.2)    |                      |
| Syrian Arab Republic |                              | -25% (-28.2 to -17.7)        | 0% (0 to 0)           | -33.9% (-37.2 to -30.6) | -24.8% (-27 to -22)     | -25% (-28.2 to -17.7)   |                      |
| Tunisia              |                              | 6.7% (3.1 to 13)             | 0% (0 to 0)           | 2.8% (0.5 to 5.2)       | 6.6% (4.4 to 8.7)       | 6.7% (3.1 to 13)        |                      |
| Turkey               |                              | 14.4% (6 to 27.7)            | 0% (0 to 0)           | 3.7% (-1.4 to 8.5)      | 14.5% (7.4 to 21.1)     | 14.4% (6 to 27.7)       |                      |
| United Arab Emirates |                              | 9.3% (0.3 to 26.7)           | 0% (0 to 0)           | 3.4% (-10.6 to 18.4)    | 8.7% (1.9 to 17.1)      | 9.3% (0.3 to 26.7)      |                      |

**Table S32** Temporal changes in the number of DALYs, mortality, incidence, prevalence, and YLDs of neurological conditions in North Africa and Middle East and the world from 2010 to 2019

| Condition                    | Location                     | DALYs                  | Deaths                | Incidence               | Prevalence              | YLDs                    |
|------------------------------|------------------------------|------------------------|-----------------------|-------------------------|-------------------------|-------------------------|
| Tension-type headache        | Yemen                        | 33·3% (28·7 to 39·5)   | 0% (0 to 0)           | 29·6% (27·8 to 31·6)    | 33·4% (32·2 to 34·8)    | 33·3% (28·7 to 39·5)    |
|                              | Global                       | 13·3% (9·9 to 16)      | 0% (0 to 0)           | 12% (10·7 to 13·4)      | 12·6% (11·2 to 14)      | 13·3% (9·9 to 16)       |
|                              | North Africa and Middle East | 22·3% (17·4 to 27·5)   | 0% (0 to 0)           | 19·3% (17·2 to 21·4)    | 21·2% (18·9 to 23·7)    | 22·3% (17·4 to 27·5)    |
|                              | Afghanistan                  | 39·4% (26·8 to 56)     | 0% (0 to 0)           | 35% (31·8 to 39·1)      | 36·3% (32·8 to 40·4)    | 39·4% (26·8 to 56)      |
|                              | Algeria                      | 17·8% (8·7 to 29·6)    | 0% (0 to 0)           | 15·4% (12·4 to 18·8)    | 15% (11·8 to 18·3)      | 17·8% (8·7 to 29·6)     |
|                              | Bahrain                      | 23% (10 to 40·6)       | 0% (0 to 0)           | 16·9% (9·5 to 24·5)     | 18·5% (11·4 to 26)      | 23% (10 to 40·6)        |
|                              | Egypt                        | 20·5% (9·6 to 30·6)    | 0% (0 to 0)           | 20·5% (18·8 to 22·3)    | 20·2% (18·4 to 21·9)    | 20·5% (9·6 to 30·6)     |
|                              | Iran                         | 15·8% (9·8 to 21·6)    | 0% (0 to 0)           | 13·3% (8·2 to 19)       | 15·5% (10·6 to 20·7)    | 15·8% (9·8 to 21·6)     |
|                              | Iraq                         | 34·2% (23·1 to 49·9)   | 0% (0 to 0)           | 27·3% (24·7 to 30·3)    | 29·6% (26·6 to 32·5)    | 34·2% (23·1 to 49·9)    |
|                              | Jordan                       | 70·2% (57·3 to 86·2)   | 0% (0 to 0)           | 65·1% (62·5 to 67·8)    | 67·3% (64·8 to 70·1)    | 70·2% (57·3 to 86·2)    |
|                              | Kuwait                       | 59·1% (47·6 to 78·6)   | 0% (0 to 0)           | 50·3% (46·2 to 54·2)    | 51·7% (47·5 to 56·3)    | 59·1% (47·6 to 78·6)    |
|                              | Lebanon                      | 27% (17·9 to 37)       | 0% (0 to 0)           | 25·7% (22·8 to 28·5)    | 25·2% (22·4 to 28·1)    | 27% (17·9 to 37)        |
|                              | Libya                        | 21% (12·4 to 35)       | 0% (0 to 0)           | 14% (10·7 to 17·4)      | 16·2% (12·7 to 19·9)    | 21% (12·4 to 35)        |
|                              | Morocco                      | 13·8% (5·6 to 24·6)    | 0% (0 to 0)           | 10·6% (8·9 to 12·7)     | 11·5% (9·5 to 13·5)     | 13·8% (5·6 to 24·6)     |
|                              | Oman                         | 74% (58·5 to 95·6)     | 0% (0 to 0)           | 67·2% (59·4 to 74·8)    | 69·1% (60·7 to 77·4)    | 74% (58·5 to 95·6)      |
|                              | Palestine                    | 29% (19·4 to 43)       | 0% (0 to 0)           | 24·3% (22·6 to 26·2)    | 25·6% (23·5 to 27·6)    | 29% (19·4 to 43)        |
|                              | Qatar                        | 65·6% (48·7 to 85·1)   | 0% (0 to 0)           | 65·5% (62·8 to 68·3)    | 64·4% (62·1 to 66·6)    | 65·6% (48·7 to 85·1)    |
|                              | Saudi Arabia                 | 41·1% (29·6 to 58·9)   | 0% (0 to 0)           | 31·6% (27·5 to 35·9)    | 34% (29·5 to 38·7)      | 41·1% (29·6 to 58·9)    |
|                              | Sudan                        | 29·9% (19·5 to 43·3)   | 0% (0 to 0)           | 25·8% (24·6 to 27·1)    | 27·4% (26·2 to 28·6)    | 29·9% (19·5 to 43·3)    |
|                              | Syrian Arab Republic         | -21·4% (-29·2 to -9·9) | 0% (0 to 0)           | -26·7% (-30·2 to -23·1) | -24·5% (-28·3 to -21)   | -21·4% (-29·2 to -9·9)  |
| Tunisia                      | 10·7% (2 to 20·6)            | 0% (0 to 0)            | 8·3% (5·9 to 11·2)    | 8·5% (5·8 to 11·4)      | 10·7% (2 to 20·6)       |                         |
| Turkey                       | 20% (-0·5 to 38·9)           | 0% (0 to 0)            | 17·8% (13·2 to 24)    | 25·9% (18·2 to 35·5)    | 20% (-0·5 to 38·9)      |                         |
| United Arab Emirates         | 17·5% (-0·8 to 43·2)         | 0% (0 to 0)            | 9·9% (-2·5 to 22·3)   | 10·7% (-1·7 to 23·8)    | 17·5% (-0·8 to 43·2)    |                         |
| Yemen                        | 34·7% (25 to 47·8)           | 0% (0 to 0)            | 31·5% (29·8 to 33·3)  | 32·8% (31 to 34·8)      | 34·7% (25 to 47·8)      |                         |
| Motor neuron disease         | Global                       | 23·8% (18·3 to 28·9)   | 29·2% (23·2 to 34·7)  | 28·1% (25·5 to 31)      | 21·2% (18·8 to 23·9)    | 21·2% (18·7 to 23·9)    |
|                              | North Africa and Middle East | 19·9% (-3·4 to 46·6)   | 37·9% (11·5 to 69)    | 29·3% (24·8 to 33·8)    | 25·8% (21·8 to 29·6)    | 25·8% (21·8 to 29·6)    |
|                              | Afghanistan                  | 54·8% (28·6 to 85·8)   | 58·5% (19·9 to 107·2) | 43% (33·6 to 53·8)      | 44·7% (37·7 to 54·7)    | 44·7% (37·7 to 54·7)    |
|                              | Algeria                      | 36% (8·7 to 69·9)      | 46·6% (8·4 to 96·8)   | 35·3% (28·5 to 41·9)    | 23·8% (16·8 to 30·2)    | 23·8% (16·8 to 30·2)    |
|                              | Bahrain                      | 49% (25·7 to 76·9)     | 75·7% (36·1 to 124·5) | 53·2% (40·3 to 67·2)    | 26·1% (16·2 to 36·6)    | 26·1% (16·2 to 36·6)    |
|                              | Egypt                        | 48·5% (-0·1 to 111·2)  | 58·3% (2·6 to 128·9)  | 28·3% (22·3 to 35·5)    | 27% (20·6 to 32·3)      | 27% (20·6 to 32·3)      |
|                              | Iran                         | 52·8% (29·9 to 76·9)   | 75·7% (44·5 to 109·7) | 36·9% (31 to 43)        | 24·1% (17·2 to 30·9)    | 24·1% (17·2 to 30·9)    |
|                              | Iraq                         | 33·2% (12·4 to 60·5)   | 46·2% (8·1 to 94·7)   | 34·9% (27 to 41·9)      | 37·7% (31 to 44·2)      | 37·7% (31 to 44·2)      |
|                              | Jordan                       | 76·1% (39·7 to 124·8)  | 87·4% (45·7 to 137·4) | 73·1% (62·5 to 85·7)    | 73·9% (64·4 to 84·4)    | 73·9% (64·4 to 84·4)    |
|                              | Kuwait                       | 18·3% (-9·8 to 48·3)   | 37·1% (0·7 to 75·2)   | 61·6% (50·1 to 73)      | 53·5% (44·9 to 63·6)    | 53·5% (44·9 to 63·6)    |
|                              | Lebanon                      | 43·1% (10·9 to 77·4)   | 43·8% (2·8 to 88·7)   | 37·6% (31·3 to 44·1)    | 35·1% (29·5 to 41·9)    | 35·1% (29·5 to 41·9)    |
|                              | Libya                        | 55·1% (8·6 to 113·8)   | 71% (9·5 to 149)      | 32% (23·1 to 41·6)      | 16·3% (8·9 to 23·7)     | 16·3% (8·9 to 23·7)     |
|                              | Morocco                      | 39·1% (10·7 to 75·2)   | 58·8% (17·3 to 118·9) | 20·3% (13 to 26·6)      | 18·7% (13·1 to 24·3)    | 18·7% (13·1 to 24·3)    |
|                              | Oman                         | 46·9% (21 to 79·6)     | 37·1% (6·5 to 80·3)   | 81·8% (68 to 97·4)      | 81·4% (69·8 to 94·5)    | 81·4% (69·8 to 94·5)    |
|                              | Palestine                    | 27·9% (7·6 to 53·6)    | 40·6% (6 to 81·4)     | 22·8% (14·3 to 30·6)    | 30·7% (23·9 to 36·8)    | 30·6% (23·9 to 36·8)    |
|                              | Qatar                        | 79·6% (48·5 to 118·8)  | 96·5% (39·9 to 171·7) | 79·2% (69·2 to 88·7)    | 72·4% (63·2 to 81)      | 72·4% (63·2 to 81)      |
|                              | Saudi Arabia                 | 63·3% (25·8 to 112·8)  | 72·7% (22·9 to 133·4) | 47·2% (36·6 to 57·6)    | 42·9% (34 to 51·2)      | 43% (34 to 51·2)        |
|                              | Sudan                        | 39·7% (11·5 to 76)     | 49·5% (9 to 101·9)    | 25·4% (17·1 to 32·6)    | 33·3% (27 to 38·9)      | 33·3% (27 to 38·9)      |
|                              | Syrian Arab Republic         | 7·2% (-22·1 to 47·9)   | 36·5% (-9·8 to 101·2) | -15·7% (-24·3 to -7·7)  | -25·8% (-31·2 to -19·9) | -25·7% (-31·2 to -19·9) |
|                              | Tunisia                      | 32·3% (1·4 to 75·1)    | 46·1% (2 to 113)      | 26·1% (19·1 to 31·9)    | 15·9% (10·5 to 22·3)    | 15·9% (10·5 to 22·3)    |
| Turkey                       | 4·8% (-23·4 to 39·8)         | 24·6% (-7·5 to 66·5)   | 20·1% (14·7 to 26)    | 20·6% (15·3 to 26)      | 20·6% (15·3 to 26)      |                         |
| United Arab Emirates         | 114·3% (41·5 to 219·4)       | 155·1% (59·2 to 278·3) | 61·6% (38·9 to 86·8)  | 17·5% (2·8 to 33·8)     | 17·5% (2·8 to 33·8)     |                         |
| Yemen                        | 41·8% (13·1 to 74·6)         | 51·4% (8·7 to 101·9)   | 30·6% (21·6 to 40·5)  | 32·7% (25·3 to 40·1)    | 32·7% (25·3 to 40·1)    |                         |
| Other neurological disorders | Global                       | 18·8% (12·3 to 25·4)   | 24·3% (18·3 to 29·8)  |                         | 19% (15·5 to 23)        | 26·6% (15·6 to 38·4)    |



**Table S32** Temporal changes in the number of DALYs, mortality, incidence, prevalence, and YLDs of neurological conditions in North Africa and Middle East and the world from 2010 to 2019

| Condition      | Location                     | DALYs                  | Deaths                 | Incidence              | Prevalence              | YLDs                    |
|----------------|------------------------------|------------------------|------------------------|------------------------|-------------------------|-------------------------|
|                | North Africa and Middle East | 22.2% (4 to 44)        | 37.5% (23.6 to 50.7)   |                        | 22.9% (17.8 to 28.5)    | 24.4% (-8.1 to 66.3)    |
|                | Afghanistan                  | 42.9% (-29.9 to 188.6) | 35.1% (6.7 to 70.5)    |                        | 34.7% (28.8 to 42.2)    | 54% (-65.1 to 628.2)    |
|                | Algeria                      | 23.4% (-32.5 to 123.1) | 35.4% (10.3 to 64.4)   |                        | 22.7% (17.8 to 27.2)    | 24.8% (-57.6 to 281.7)  |
|                | Bahrain                      | 19.7% (-29.2 to 100.9) | 34.5% (11.4 to 62.7)   |                        | 31.9% (19.1 to 45.8)    | 24.1% (-58.4 to 286.8)  |
|                | Egypt                        | 18.5% (-36.5 to 125)   | 40.7% (7.7 to 82.3)    |                        | 21.7% (19.4 to 23.9)    | 12.2% (-65.7 to 281.8)  |
|                | Iran                         | 24.3% (8.6 to 43)      | 55.6% (44 to 67.6)     |                        | 17.5% (8 to 26.6)       | 20.9% (-3.2 to 51.7)    |
|                | Iraq                         | 26% (-31.2 to 115.9)   | 20.7% (-2.7 to 51.5)   |                        | 28.6% (23.9 to 33.4)    | 44.4% (-63.3 to 455.5)  |
|                | Jordan                       | 78.7% (0.9 to 218.6)   | 78.4% (47.1 to 116)    |                        | 68.8% (62.7 to 75)      | 90.9% (-38.2 to 507.7)  |
|                | Kuwait                       | 49.4% (-21.7 to 176.7) | 54.9% (27 to 88.6)     |                        | 59.2% (51.3 to 67.6)    | 54.5% (-45.4 to 339.8)  |
|                | Lebanon                      | 43.7% (-12.7 to 137.5) | 46.9% (22.4 to 75.3)   |                        | 26.2% (23.3 to 28.9)    | 43.6% (-45 to 282.2)    |
|                | Libya                        | 12.4% (-30.1 to 88.7)  | 31.4% (5.6 to 63.9)    |                        | 21.4% (13.8 to 30.1)    | 11.3% (-58.1 to 243.1)  |
|                | Morocco                      | 17.6% (-35.4 to 122.8) | 31.5% (8.6 to 60.9)    |                        | 13.8% (10 to 18.2)      | 22.8% (-60.5 to 287.7)  |
|                | Oman                         | 53.9% (-24.7 to 190.2) | 33.9% (14.6 to 56.6)   |                        | 68.2% (56.6 to 79.1)    | 70% (-49.8 to 465.3)    |
|                | Palestine                    | 28.2% (-33.6 to 146.4) | 33.2% (7.3 to 65)      |                        | 24% (20.2 to 28.1)      | 35.8% (-58.8 to 390.9)  |
|                | Qatar                        | 54.7% (-15.8 to 158.7) | 37.6% (8.2 to 73.7)    |                        | 69.3% (64.6 to 75.3)    | 79.4% (-40.5 to 437.4)  |
|                | Saudi Arabia                 | 28.4% (-35.2 to 156.3) | 47.6% (18.8 to 83.6)   |                        | 36.9% (28.3 to 45.7)    | 25.6% (-62.8 to 316.9)  |
|                | Sudan                        | 34.1% (-27.4 to 160)   | 45.6% (2.4 to 102.9)   |                        | 24.1% (21 to 27.3)      | 34.9% (-62.3 to 393.2)  |
|                | Syrian Arab Republic         | -23.7% (-57.3 to 36.6) | -12.5% (-32.2 to 12.4) |                        | -20.2% (-27.2 to -12.2) | -17.9% (-73.9 to 171.3) |
|                | Tunisia                      | 18.4% (-28.8 to 106.3) | 29.7% (-1.6 to 71.6)   |                        | 14.7% (10.1 to 19.6)    | 22.8% (-51.2 to 230.3)  |
|                | Turkey                       | 13.3% (-27.1 to 71.9)  | 33% (7.7 to 65)        |                        | 22% (4.1 to 43.5)       | 19.1% (-57.9 to 236.7)  |
|                | United Arab Emirates         | 33.7% (-12.5 to 100.4) | 76.1% (27.5 to 136.2)  |                        | 31.3% (9.6 to 56.3)     | 12.6% (-62.1 to 261.1)  |
|                | Yemen                        | 23.9% (-42 to 180.6)   | 29.4% (-1.2 to 64.8)   |                        | 29.3% (25.5 to 33.8)    | 27.6% (-65.5 to 447.6)  |
| Head injuries§ | Global                       |                        |                        | 12.3% (9.7 to 14.8)    | 20.6% (19.7 to 21.5)    | 19.8% (18.8 to 20.9)    |
|                | North Africa and Middle East |                        |                        | 25% (21.5 to 30.3)     | 35.2% (32.7 to 37.8)    | 34.5% (31.7 to 37.6)    |
|                | Afghanistan                  |                        |                        | 43.7% (33.7 to 56.2)   | 37% (15.6 to 59)        | 37.5% (16.5 to 61.7)    |
|                | Algeria                      |                        |                        | 11.9% (7.2 to 16.4)    | 26.5% (23.9 to 28.8)    | 25.7% (19.7 to 32.1)    |
|                | Bahrain                      |                        |                        | 9.1% (3.3 to 15.5)     | 46.1% (42.2 to 50.5)    | 44.5% (34.7 to 55.2)    |
|                | Egypt                        |                        |                        | 29.9% (24.5 to 35.4)   | 34.6% (32 to 37.2)      | 34% (26.9 to 41.4)      |
|                | Iran                         |                        |                        | 1.2% (-2.3 to 4.5)     | 14.6% (12.2 to 16.6)    | 14.1% (11.4 to 16.5)    |
|                | Iraq                         |                        |                        | -5.9% (-27 to 11.6)    | 37% (34.5 to 39.4)      | 37.2% (31.4 to 43.7)    |
|                | Jordan                       |                        |                        | 64.3% (58.1 to 70.4)   | 85% (81.2 to 88.6)      | 84.2% (73.3 to 96.5)    |
|                | Kuwait                       |                        |                        | 33.5% (27.7 to 40.2)   | 52.7% (49 to 56.1)      | 52.1% (43.7 to 59.8)    |
|                | Lebanon                      |                        |                        | 42.1% (37.7 to 46.6)   | 31.9% (19.8 to 42.3)    | 32.5% (19.3 to 45.2)    |
|                | Libya                        |                        |                        | 33.3% (17.2 to 67.7)   | 38.9% (32.2 to 48.5)    | 37.2% (27.9 to 48.4)    |
|                | Morocco                      |                        |                        | 9.3% (5 to 13.3)       | 21.3% (18.6 to 23.8)    | 20.7% (14.9 to 26.8)    |
|                | Oman                         |                        |                        | 53.6% (44.2 to 64.5)   | 81.2% (77.5 to 84.8)    | 81% (71.1 to 91.8)      |
|                | Palestine                    |                        |                        | -7.4% (-34.3 to 15.2)  | 17.6% (8.9 to 29.2)     | 18.3% (8 to 31.4)       |
|                | Qatar                        |                        |                        | 45.9% (38.4 to 54.4)   | 48.3% (44.3 to 52.2)    | 47.7% (38.6 to 56.7)    |
|                | Saudi Arabia                 |                        |                        | 33.1% (26.5 to 40.2)   | 52.1% (48.4 to 55.8)    | 51.8% (44.8 to 59.1)    |
|                | Sudan                        |                        |                        | 14.6% (-4.1 to 26.2)   | 29.6% (24.7 to 33.5)    | 29.8% (20.8 to 39.7)    |
|                | Syrian Arab Republic         |                        |                        | 19.6% (-8 to 76.7)     | 85.7% (32.8 to 172.2)   | 75.8% (28.9 to 164.3)   |
|                | Tunisia                      |                        |                        | 9.3% (5.2 to 13.4)     | 23.5% (21.1 to 25.8)    | 22.8% (16.7 to 29)      |
|                | Turkey                       |                        |                        | 26.8% (22.6 to 31.1)   | 37.6% (34.8 to 40.4)    | 37.3% (30.6 to 44.4)    |
|                | United Arab Emirates         |                        |                        | 2.9% (-5.1 to 12.1)    | 42.7% (38 to 46.9)      | 41.2% (30.5 to 53.9)    |
|                | Yemen                        |                        |                        | 168.5% (83.2 to 337.8) | 68.6% (49.9 to 97.3)    | 64.8% (45.3 to 92.9)    |
| Minor TBI      | Global                       |                        |                        | 10% (6.2 to 13.1)      | 23.5% (22.4 to 24.7)    | 23.1% (21.7 to 24.5)    |
|                | North Africa and Middle East |                        |                        | 24.8% (19.5 to 33.7)   | 37.4% (33.2 to 43.6)    | 37.3% (31.9 to 43.9)    |
|                | Afghanistan                  |                        |                        | 40.2% (28.5 to 54.4)   | 36.5% (15.3 to 60.7)    | 36.8% (15.4 to 65.5)    |
|                | Algeria                      |                        |                        | 8.7% (2 to 13.9)       | 24.4% (20.2 to 28.4)    | 24.2% (11 to 38.7)      |
|                | Bahrain                      |                        |                        | 6.2% (0.5 to 11.9)     | 44.2% (39 to 49.5)      | 43.9% (24.9 to 66.1)    |

**Table S32** Temporal changes in the number of DALYs, mortality, incidence, prevalence, and YLDs of neurological conditions in North Africa and Middle East and the world from 2010 to 2019

| Condition               | Location                        | DALYs | Deaths | Incidence              | Prevalence             | YLDs                  |
|-------------------------|---------------------------------|-------|--------|------------------------|------------------------|-----------------------|
|                         | Egypt                           |       |        | 32% (26·1 to 39·4)     | 36·9% (33·3 to 40·8)   | 36·6% (22·1 to 52·4)  |
|                         | Iran                            |       |        | -2·2% (-6·6 to 1·7)    | 12·3% (7·8 to 16·2)    | 12·1% (6·6 to 17·3)   |
|                         | Iraq                            |       |        | -17% (-41·5 to 6·9)    | 31·7% (26·8 to 35·7)   | 32·8% (23·2 to 43·6)  |
|                         | Jordan                          |       |        | 63% (56·8 to 69·2)     | 85·2% (79·9 to 91·5)   | 85·8% (63·5 to 111·5) |
|                         | Kuwait                          |       |        | 33·1% (27·3 to 39·5)   | 51·5% (45·7 to 57·5)   | 51·4% (34·4 to 69·2)  |
|                         | Lebanon                         |       |        | 41·6% (36·9 to 46·8)   | 22·3% (9·8 to 36·9)    | 22% (7·4 to 42·5)     |
|                         | Libya                           |       |        | 48·1% (18·3 to 119·2)  | 56·6% (38 to 88·2)     | 55·9% (32·7 to 90·7)  |
|                         | Morocco                         |       |        | 6·5% (2·2 to 10·7)     | 19·8% (16·4 to 23)     | 19·8% (8·5 to 32·7)   |
|                         | Oman                            |       |        | 55·3% (45·9 to 65·2)   | 76·6% (70 to 83·5)     | 77·5% (54·8 to 102·4) |
|                         | Palestine                       |       |        | -21·2% (-51 to 9·6)    | 6·2% (-1·5 to 19·5)    | 5·9% (-5·2 to 23·4)   |
|                         | Qatar                           |       |        | 46·2% (38·7 to 54·9)   | 49·3% (40·6 to 56·4)   | 48·9% (30·1 to 70·6)  |
|                         | Saudi Arabia                    |       |        | 27·6% (20·8 to 35·2)   | 46·3% (40·8 to 51·5)   | 46·2% (32·2 to 60·5)  |
|                         | Sudan                           |       |        | 11·8% (-12·2 to 26·1)  | 26·9% (19·2 to 33·1)   | 27·2% (13·8 to 43·4)  |
|                         | Syrian Arab Republic            |       |        | 31·3% (-10·5 to 137·8) | 185·4% (61·1 to 401·1) | 181% (59·5 to 403·9)  |
|                         | Tunisia                         |       |        | 6% (1·7 to 10·2)       | 23·3% (20 to 26·4)     | 22·7% (10·9 to 36·9)  |
|                         | Turkey                          |       |        | 20·5% (16·1 to 24·9)   | 35·5% (31·3 to 39·4)   | 35·5% (21·9 to 51·5)  |
|                         | United Arab Emirates            |       |        | -4·6% (-11 to 2·6)     | 38·2% (32·5 to 45·3)   | 37·7% (16·5 to 65·3)  |
|                         | Yemen                           |       |        | 249·9% (97·6 to 535·2) | 129·3% (70·9 to 229)   | 126% (66 to 224·7)    |
| Moderate/<br>Severe TBI | Global                          |       |        | 14·4% (11·8 to 17·2)   | 19·7% (18·7 to 20·9)   | 19·1% (17·9 to 20·3)  |
|                         | North Africa and<br>Middle East |       |        | 25·2% (21·8 to 30·1)   | 34·5% (32·3 to 37·4)   | 33·9% (30·9 to 37·2)  |
|                         | Afghanistan                     |       |        | 51·8% (38·8 to 70·5)   | 37·4% (16 to 57·6)     | 37·9% (15·7 to 61)    |
|                         | Algeria                         |       |        | 14·8% (10·1 to 19·5)   | 27% (24·1 to 29·8)     | 26% (19·1 to 33·4)    |
|                         | Bahrain                         |       |        | 11·8% (5·1 to 19·2)    | 46·5% (41·9 to 51·7)   | 44·6% (33·6 to 56·6)  |
|                         | Egypt                           |       |        | 28% (22·5 to 33·9)     | 34·1% (30·9 to 37·2)   | 33·6% (25·4 to 41·6)  |
|                         | Iran                            |       |        | 4·2% (0·5 to 7·7)      | 15·2% (12·7 to 17·3)   | 14·5% (11·6 to 17·2)  |
|                         | Iraq                            |       |        | 14·2% (-2·3 to 25·8)   | 39·6% (37·2 to 42·3)   | 39% (31·7 to 46·9)    |
|                         | Jordan                          |       |        | 65·7% (58·6 to 72·6)   | 84·9% (80·2 to 89·4)   | 83·9% (72·1 to 97·3)  |
|                         | Kuwait                          |       |        | 33·8% (27·2 to 41·7)   | 53% (48·9 to 56·8)     | 52·2% (42·9 to 61·3)  |
|                         | Lebanon                         |       |        | 42·6% (37·6 to 47·5)   | 35·6% (21·9 to 45·4)   | 35·7% (19·6 to 49)    |
|                         | Libya                           |       |        | 19·8% (11·4 to 33·9)   | 34·6% (28·7 to 44·9)   | 33·6% (24·6 to 46·1)  |
|                         | Morocco                         |       |        | 11·8% (6·9 to 16·3)    | 21·6% (18·6 to 24·6)   | 20·9% (14·6 to 27·9)  |
|                         | Oman                            |       |        | 52·2% (41·3 to 64·7)   | 82·2% (77·9 to 86·5)   | 81·6% (71·6 to 93·4)  |
|                         | Palestine                       |       |        | 17·9% (-3·9 to 33·1)   | 23·8% (9·9 to 38·3)    | 23·6% (8·7 to 39·8)   |
|                         | Qatar                           |       |        | 45·7% (37·6 to 54·4)   | 48% (43·6 to 52·1)     | 47·4% (38 to 57·6)    |
|                         | Saudi Arabia                    |       |        | 38·6% (31·6 to 46·3)   | 53·5% (49·3 to 57·9)   | 52·8% (45 to 61·3)    |
|                         | Sudan                           |       |        | 23·5% (14·8 to 31·2)   | 31·9% (27·2 to 35·5)   | 31·6% (19·4 to 46·1)  |
|                         | Syrian Arab Republic            |       |        | 6·6% (-14·5 to 51·4)   | 57·8% (14·5 to 161·5)  | 53% (10·4 to 155·9)   |
|                         | Tunisia                         |       |        | 12·2% (7·4 to 16·9)    | 23·6% (20·8 to 26·5)   | 22·8% (16·3 to 29·6)  |
|                         | Turkey                          |       |        | 32·4% (27·6 to 37·2)   | 38·1% (34·8 to 41·5)   | 37·6% (29·9 to 45·8)  |
|                         | United Arab Emirates            |       |        | 9·7% (-0·2 to 20·8)    | 43·6% (38·3 to 48·6)   | 41·8% (29·8 to 55·9)  |
|                         | Yemen                           |       |        | 76·5% (41·1 to 153·2)  | 51·9% (39·6 to 80·5)   | 51·8% (35·4 to 81·1)  |
| Spinal injuries¶        | Global                          |       |        | 17·4% (7·3 to 25·4)    | 27·2% (24·8 to 29)     | 23·4% (20·4 to 25·6)  |
|                         | North Africa and<br>Middle East |       |        | 45·3% (29 to 68·7)     | 41·4% (29·9 to 53·8)   | 39·2% (26 to 53·2)    |
|                         | Afghanistan                     |       |        | 72·6% (42·6 to 103)    | 26·1% (-3·2 to 83·4)   | 25·1% (-3·9 to 84·8)  |
|                         | Algeria                         |       |        | 8·1% (-7·3 to 17)      | 19·1% (11·4 to 25·6)   | 12·5% (1·1 to 27·1)   |
|                         | Bahrain                         |       |        | 15% (8·9 to 21·3)      | 45·8% (40·8 to 50·8)   | 39·8% (22·9 to 59·6)  |
|                         | Egypt                           |       |        | 40% (29·5 to 61·5)     | 41·2% (36 to 48·2)     | 36·6% (20·2 to 55·7)  |
|                         | Iran                            |       |        | 0·9% (-6·3 to 6·8)     | 3·8% (-2·8 to 11)      | -2% (-8·6 to 6·2)     |
|                         | Iraq                            |       |        | -44·1% (-62·3 to -6·6) | 40% (38·2 to 42·4)     | 36·2% (28·9 to 44·2)  |
|                         | Jordan                          |       |        | 68·6% (62·4 to 74·5)   | 92·9% (85·1 to 106)    | 87·2% (62·3 to 120)   |
|                         | Kuwait                          |       |        | 37·6% (32·2 to 43·9)   | 50·6% (42·8 to 58·6)   | 46·2% (32·6 to 63)    |

**Table S32** Temporal changes in the number of DALYs, mortality, incidence, prevalence, and YLDs of neurological conditions in North Africa and Middle East and the world from 2010 to 2019

| Condition                           | Location                     | DALYs | Deaths                 | Incidence                | Prevalence               | YLDs                     |
|-------------------------------------|------------------------------|-------|------------------------|--------------------------|--------------------------|--------------------------|
|                                     | Lebanon                      |       |                        | 46.3% (41.2 to 52.1)     | 5% (-2.8 to 28.5)        | 0.5% (-7.2 to 24.6)      |
|                                     | Libya                        |       |                        | 138.8% (43.2 to 385)     | 95.3% (50.8 to 153.6)    | 109.7% (54.7 to 174)     |
|                                     | Morocco                      |       |                        | 11.3% (7 to 15.3)        | 19.3% (15.1 to 22.9)     | 13.6% (2.6 to 25.5)      |
|                                     | Oman                         |       |                        | 51.4% (40.8 to 61.3)     | 93.7% (88.7 to 99.1)     | 87.7% (65.5 to 112.2)    |
|                                     | Palestine                    |       |                        | -52.3% (-75 to -6.7)     | -2.8% (-5.8 to 7.9)      | -6.8% (-10.7 to 3.8)     |
|                                     | Qatar                        |       |                        | 49.3% (41.8 to 57.8)     | 52.8% (46.6 to 59.3)     | 49.9% (31 to 69.6)       |
|                                     | Saudi Arabia                 |       |                        | 36.5% (30.3 to 42.7)     | 53% (48.4 to 57.6)       | 44.3% (31.2 to 59.5)     |
|                                     | Sudan                        |       |                        | 16.2% (-12.1 to 33.9)    | 31.5% (20.1 to 42)       | 25.5% (12.5 to 43.4)     |
|                                     | Syrian Arab Republic         |       |                        | 253.8% (40.8 to 823)     | 496.5% (146.4 to 1051.1) | 595.6% (190.1 to 1256.7) |
|                                     | Tunisia                      |       |                        | 15.9% (11.4 to 21)       | 25% (21.8 to 28.5)       | 20% (8.3 to 34)          |
|                                     | Turkey                       |       |                        | 30% (25.3 to 34.9)       | 30.1% (24.8 to 34.7)     | 24.9% (12.7 to 37.9)     |
|                                     | United Arab Emirates         |       |                        | 9.5% (1.9 to 17.7)       | 36.7% (32.2 to 41.4)     | 31.1% (12.2 to 54.2)     |
|                                     | Yemen                        |       |                        | 598.4% (194.5 to 1168.3) | 192.3% (81.7 to 339.4)   | 217.1% (88.5 to 393.6)   |
| Spinal cord lesion at neck level    | Global                       |       |                        | 17.1% (4.9 to 26.6)      | 26.7% (23.1 to 29)       | 24.3% (20.4 to 27)       |
|                                     | North Africa and Middle East |       |                        | 56.3% (33.2 to 81.9)     | 45.5% (29.9 to 60.1)     | 42.9% (27.4 to 57.7)     |
|                                     | Afghanistan                  |       |                        | 77.2% (46.3 to 108.7)    | 25.5% (-4.1 to 90)       | 24.9% (-5 to 89.6)       |
|                                     | Algeria                      |       |                        | 0.3% (-22.9 to 14)       | 14.4% (6.2 to 23.6)      | 11.2% (-2 to 29.6)       |
|                                     | Bahrain                      |       |                        | 14.7% (7.9 to 21.8)      | 44.2% (37.5 to 50.5)     | 41.1% (19.7 to 69.9)     |
|                                     | Egypt                        |       |                        | 49.7% (31.8 to 93.2)     | 44.7% (36.8 to 57.6)     | 41.8% (19.7 to 69.3)     |
|                                     | Iran                         |       |                        | -1.7% (-13 to 5.9)       | -0.6% (-7.2 to 8.9)      | -3.4% (-10.4 to 6.8)     |
|                                     | Iraq                         |       |                        | -56.4% (-68.3 to -22.6)  | 39.8% (38 to 42.4)       | 36.6% (29.2 to 45.4)     |
|                                     | Jordan                       |       |                        | 68.7% (61.5 to 75.3)     | 99.1% (85.6 to 124.1)    | 95.6% (60.9 to 140.8)    |
|                                     | Kuwait                       |       |                        | 36.9% (30.6 to 43.8)     | 45% (36.3 to 55)         | 43.5% (29.1 to 63.1)     |
|                                     | Lebanon                      |       |                        | 48% (41.5 to 56.8)       | -0.3% (-5.7 to 19.4)     | -1.9% (-8.6 to 20.1)     |
|                                     | Libya                        |       |                        | 247.6% (66.9 to 729.2)   | 129.6% (64.4 to 190.1)   | 131.1% (63.8 to 194.9)   |
|                                     | Morocco                      |       |                        | 11.1% (6 to 15.9)        | 17.3% (10.3 to 22.8)     | 14.3% (-0.4 to 31.5)     |
|                                     | Oman                         |       |                        | 51.4% (39.9 to 62.7)     | 95.5% (89 to 102.6)      | 92.6% (63.1 to 126.2)    |
|                                     | Palestine                    |       |                        | -67.6% (-82.4 to -27.1)  | -5.2% (-7 to 1.4)        | -7.9% (-11.7 to 1.8)     |
|                                     | Qatar                        |       |                        | 48.7% (40.5 to 57.7)     | 52.1% (44.2 to 60.7)     | 50.4% (27.4 to 77.1)     |
|                                     | Saudi Arabia                 |       |                        | 37.5% (30.8 to 44.2)     | 55.2% (48.9 to 61.4)     | 50.4% (33.2 to 70.8)     |
|                                     | Sudan                        |       |                        | 2.1% (-33.7 to 30.5)     | 25.1% (14.1 to 39.4)     | 22.4% (8.4 to 45)        |
|                                     | Syrian Arab Republic         |       |                        | 492.7% (86.8 to 1583.8)  | 773% (270.4 to 1510.4)   | 769.4% (280.7 to 1535.5) |
|                                     | Tunisia                      |       |                        | 17.1% (11.5 to 24.3)     | 25.9% (21.3 to 31.2)     | 22.7% (7.1 to 41.4)      |
| Turkey                              |                              |       | 30.6% (24.9 to 36.4)   | 30.2% (24 to 35.3)       | 27.1% (12 to 44.1)       |                          |
| United Arab Emirates                |                              |       | 9.6% (1.4 to 18.5)     | 34.6% (28.6 to 40.5)     | 30.6% (7 to 62)          |                          |
| Yemen                               |                              |       | 920.9% (313 to 1565.9) | 290.8% (120.5 to 465.5)  | 291.3% (116.8 to 478.1)  |                          |
| Spinal cord lesion below neck level | Global                       |       |                        | 17.7% (2.4 to 28.2)      | 27.8% (25.9 to 29.4)     | 21.7% (19.3 to 23.7)     |
|                                     | North Africa and Middle East |       |                        | 23.5% (20 to 27.1)       | 31.1% (26.1 to 34.7)     | 21.5% (14.9 to 27.8)     |
|                                     | Afghanistan                  |       |                        | 23.9% (2.8 to 38.7)      | 36% (25.2 to 45.3)       | 29.5% (8.3 to 58.4)      |
|                                     | Algeria                      |       |                        | 18.7% (13.6 to 23.6)     | 26.9% (21.6 to 32.2)     | 16.5% (1 to 34.9)        |
|                                     | Bahrain                      |       |                        | 15.4% (8.8 to 21.9)      | 47.6% (42.1 to 53)       | 36.6% (15.4 to 62.3)     |
|                                     | Egypt                        |       |                        | 28.8% (23.7 to 33.9)     | 37.5% (32.9 to 43.2)     | 27.1% (8.7 to 49.6)      |
|                                     | Iran                         |       |                        | 3.9% (-3.6 to 10.5)      | 11.9% (5.3 to 17.4)      | 2.8% (-4 to 9.7)         |
|                                     | Iraq                         |       |                        | 30.2% (26.4 to 34.5)     | 41.7% (37.8 to 45.9)     | 29.6% (13.2 to 49.7)     |
|                                     | Jordan                       |       |                        | 68.6% (62.1 to 74.9)     | 86.2% (80 to 92.9)       | 69.9% (42.4 to 98.8)     |
|                                     | Kuwait                       |       |                        | 38.5% (32.5 to 45.2)     | 60.6% (54.5 to 67)       | 57% (36.8 to 80.1)       |

**Table S32** Temporal changes in the number of DALYs, mortality, incidence, prevalence, and YLDs of neurological conditions in North Africa and Middle East and the world from 2010 to 2019

| Condition | Location             | DALYs | Deaths | Incidence            | Prevalence           | YLDs                  |
|-----------|----------------------|-------|--------|----------------------|----------------------|-----------------------|
|           | Lebanon              |       |        | 44.5% (39.4 to 49.7) | 48.5% (43.8 to 53.4) | 44.5% (25.8 to 66.7)  |
|           | Libya                |       |        | 12.7% (8.7 to 17)    | 34.7% (28 to 45.4)   | 35.7% (17.3 to 58.7)  |
|           | Morocco              |       |        | 11.5% (6.8 to 16.3)  | 21.5% (17.7 to 25.5) | 12.2% (-1.9 to 29.7)  |
|           | Oman                 |       |        | 51.3% (38.2 to 63.2) | 91.7% (85.6 to 98.2) | 76.6% (49.4 to 106.3) |
|           | Palestine            |       |        | 42.6% (36.8 to 51.1) | 37% (22.6 to 48)     | 26.9% (5.4 to 53.4)   |
|           | Qatar                |       |        | 49.9% (42.5 to 58.4) | 53.5% (45.3 to 62.2) | 48.5% (24.6 to 76.5)  |
|           | Saudi Arabia         |       |        | 35.5% (29.2 to 42)   | 50.9% (44.9 to 57.3) | 32.3% (16.2 to 49.9)  |
|           | Sudan                |       |        | 36.8% (30.9 to 44.4) | 43.1% (37.3 to 49.3) | 34.8% (19.5 to 52.9)  |
|           | Syrian Arab Republic |       |        | -13.8% (-20 to -2.6) | -3.8% (-8 to 1)      | -8.1% (-21.9 to 7.6)  |
|           | Tunisia              |       |        | 14.5% (10.1 to 19.3) | 24.2% (20.1 to 28.4) | 14.3% (-0.7 to 30.9)  |
|           | Turkey               |       |        | 29.3% (22.8 to 35.7) | 30.1% (22.6 to 36.7) | 19.3% (5.2 to 37.6)   |
|           | United Arab Emirates |       |        | 9.3% (2.5 to 17.1)   | 39.1% (33.3 to 45.1) | 32.2% (6.7 to 64.1)   |
|           | Yemen                |       |        | 26.6% (21 to 31.9)   | 36.9% (31.5 to 41.4) | 32.4% (9.8 to 57.4)   |

The presented data represent the mean percentage changes in the number of each measure, along with their corresponding 95% uncertainty intervals enclosed in parentheses. Data are rounded to one decimal place. DALYs, Disability-Adjusted Life Years; TBI, traumatic brain injury; UI, uncertainty interval; YLDs, Years Lived with Disability. \*Stroke include ischaemic stroke, intracerebral haemorrhage, and subarachnoid haemorrhage; †Neurological disorders include Alzheimer's disease and other dementias, Parkinson's disease, idiopathic epilepsy, multiple sclerosis, headache disorders (including migraine and tension-type headache), motor neuron disease, and other neurological disorders; ‡Headache disorders include migraine and tension-type headache. §Head injuries include minor TBI and moderate or severe TBI. ¶Spinal injuries include spinal cord lesion at neck level and below neck level.

***Table S33 Temporal changes in the age-standardised rate of DALY, mortality, incidence, prevalence, and YLD of neurological conditions in North Africa and Middle East and the world from 2010 to 2019***  
(NEXT PAGE)

**Table S33** Temporal changes in the age-standardised rate of DALYs, mortality, incidence, prevalence, and YLDs of neurological conditions in North Africa and Middle East and the world from 2010 to 2019

| Condition            | Location                     | DALYs                   | Deaths                  | Incidence               | Prevalence              | YLDs                    |
|----------------------|------------------------------|-------------------------|-------------------------|-------------------------|-------------------------|-------------------------|
| Meningitis           | Global                       | -35.3% (-43.7 to -24.9) | -33.2% (-40.6 to -23.8) | -13.2% (-15.6 to -10.7) | -13.1% (-15.6 to -10.4) | -10.6% (-13 to -8.1)    |
|                      | North Africa and Middle East | -45.2% (-53 to -35.9)   | -39.9% (-46.8 to -32)   | -12.3% (-15.5 to -9.1)  | -10.2% (-15.7 to -4)    | -7.2% (-10.6 to -3.4)   |
|                      | Afghanistan                  | -46.9% (-59.1 to -31.5) | -41.3% (-53 to -28.1)   | -30% (-33.5 to -26.3)   | -27.9% (-42.1 to -10.6) | -24.5% (-33.5 to -14.5) |
|                      | Algeria                      | -43.4% (-55.4 to -28.5) | -36.6% (-50.6 to -20.3) | -2.1% (-8.5 to 3.9)     | -0.5% (-17.4 to 21)     | 2.2% (-5.6 to 10.6)     |
|                      | Bahrain                      | -22.1% (-33.1 to -9.8)  | -30.5% (-41.4 to -17.7) | 16% (0.3 to 33.2)       | 28% (2.9 to 56.8)       | 29.7% (13.1 to 46.9)    |
|                      | Egypt                        | -38% (-54.6 to -15.5)   | -36.4% (-54.2 to -14.3) | -8.3% (-14.9 to -1.9)   | -10.9% (-25.8 to 9.3)   | -8.3% (-17.6 to 1.8)    |
|                      | Iran                         | -50% (-57.6 to -40.5)   | -41.9% (-49.1 to -32.3) | 10.1% (5.4 to 15.8)     | 13.4% (7.7 to 19.2)     | 16.5% (9.8 to 22.8)     |
|                      | Iraq                         | -58% (-67.3 to -46.5)   | -52.6% (-61.8 to -41.6) | -22.2% (-27.2 to -17.2) | -23.2% (-36.8 to -5.6)  | -16.7% (-23.9 to -9.1)  |
|                      | Jordan                       | 4.7% (-14.3 to 28.4)    | 2.3% (-16 to 24.5)      | 31.6% (24.4 to 39.4)    | 33.1% (12.1 to 60)      | 29.7% (9.3 to 53.1)     |
|                      | Kuwait                       | -16.9% (-32.1 to 0.5)   | -18.2% (-33 to 0.1)     | 23.1% (14.6 to 32.9)    | 25.9% (4.4 to 54.4)     | 27.1% (16.9 to 39.1)    |
|                      | Lebanon                      | -31.4% (-45.3 to -15.5) | -29.3% (-42.5 to -13.4) | 3.9% (-2.4 to 10.8)     | 7.5% (-9.4 to 29.8)     | 7.3% (-1.1 to 15.8)     |
|                      | Libya                        | -31% (-46 to -12.3)     | -23.3% (-41.3 to -2.3)  | 2.4% (-5.7 to 11.1)     | 38.2% (14.6 to 69)      | 40.9% (29 to 56.1)      |
|                      | Morocco                      | -55% (-67.6 to -38.3)   | -44.5% (-58 to -28.3)   | -11.8% (-17.1 to -5.1)  | -12.8% (-28.2 to 7.9)   | -8% (-19.3 to 5.5)      |
|                      | Oman                         | -26.5% (-37.4 to -13.9) | -23.3% (-36.2 to -6.9)  | 18.2% (9.7 to 26.5)     | 37.4% (12.7 to 67.5)    | 38.5% (24.6 to 54.1)    |
|                      | Palestine                    | -46.8% (-58.2 to -33.6) | -36.7% (-49.4 to -23.8) | -6.3% (-12 to -0.5)     | -8.7% (-24.3 to 10.3)   | -11.1% (-20.9 to -0.9)  |
|                      | Qatar                        | -22.9% (-35.5 to -9.1)  | -34.3% (-48.8 to -16.8) | 28.7% (20 to 36.4)      | 31.6% (7.1 to 61.5)     | 31.3% (7.7 to 57.6)     |
|                      | Saudi Arabia                 | -27.8% (-40.2 to -11.4) | -28.7% (-42.8 to -11.6) | 15.3% (5.5 to 26)       | 24% (2.4 to 51)         | 22.9% (10.2 to 37.1)    |
|                      | Sudan                        | -58% (-69.3 to -42.1)   | -49.1% (-62.1 to -33.1) | -60.4% (-63.2 to -57.3) | -61.9% (-69.1 to -52.7) | -60.5% (-64 to -56.7)   |
|                      | Syrian Arab Republic         | -7.2% (-26.9 to 18.2)   | -8.1% (-27.2 to 16.1)   | 16.3% (10.1 to 22.3)    | 23.7% (3.6 to 51.4)     | 21.1% (7.6 to 35.5)     |
|                      | Tunisia                      | -38.6% (-52.6 to -20.3) | -36.5% (-50 to -16.6)   | -1.1% (-6.9 to 4.7)     | 0.7% (-15.8 to 22.9)    | 2.7% (-8.9 to 16.8)     |
| Turkey               | -39% (-51.4 to -21.6)        | -33.6% (-46.5 to -16.9) | -2.6% (-9.6 to 4.5)     | -11.4% (-25.8 to 7.6)   | -13% (-23.2 to -2.7)    |                         |
| United Arab Emirates | -23.3% (-37.1 to -4.4)       | -30.9% (-44.6 to -11.1) | -2.8% (-8.6 to 3.9)     | 4.2% (-13.6 to 27.3)    | 5.4% (-5.3 to 17.1)     |                         |
| Yemen                | -33.4% (-49.4 to -13.5)      | -25.3% (-41.4 to -6.6)  | -5.3% (-11 to 1.5)      | 13.7% (-8.1 to 41.6)    | 13.9% (3.7 to 25)       |                         |
| Encephalitis         | Global                       | -14.9% (-24.5 to -3.8)  | -9.9% (-19.1 to 0.7)    | -0.1% (-1.6 to 1.3)     | -6.6% (-7.9 to -5.2)    | -5.9% (-8.2 to -3.6)    |
|                      | North Africa and Middle East | -8.6% (-23.2 to 7.2)    | -8.4% (-20.2 to 4.2)    | 1.3% (-0.7 to 3.4)      | 1.6% (-0.4 to 3.7)      | 2.6% (-0.2 to 5.2)      |
|                      | Afghanistan                  | -8.4% (-26 to 13)       | -7.6% (-25.3 to 15)     | -16% (-19.9 to -11.9)   | -13.4% (-19.5 to -6.5)  | -10% (-19.9 to 1.1)     |
|                      | Algeria                      | -9.6% (-29.1 to 16.5)   | -8.4% (-25.7 to 16.3)   | 2.4% (-2 to 7.1)        | 2.6% (-2 to 7.6)        | 3.8% (-2.7 to 10.3)     |
|                      | Bahrain                      | -19.8% (-33.9 to 0.2)   | -21.9% (-37.9 to 1.4)   | 3% (-1.2 to 8)          | 0.6% (-5.5 to 7.8)      | -1.5% (-12.3 to 7.1)    |
|                      | Egypt                        | -12.2% (-39.9 to 26.7)  | -10.6% (-36.4 to 23.5)  | -5.3% (-9.6 to 0.1)     | -7.6% (-12 to -2.7)     | -6.9% (-13.3 to -0.6)   |
|                      | Iran                         | 0.4% (-17.4 to 17.9)    | 7.8% (-14.8 to 23.4)    | 6.5% (5.1 to 8)         | 9% (7.1 to 11.4)        | 11% (5.7 to 14.8)       |
|                      | Iraq                         | -21.1% (-40.1 to 2.4)   | -17.9% (-34.4 to 1.1)   | -9.7% (-13.9 to -5.7)   | -10.8% (-15.7 to -6.2)  | -6.5% (-13 to -0.5)     |
|                      | Jordan                       | -26.1% (-41.8 to 1.8)   | -28.8% (-46.2 to 1.6)   | 2% (-2.6 to 6.9)        | 1.6% (-3.5 to 6.6)      | 1.2% (-7 to 6.8)        |
|                      | Kuwait                       | -15% (-29.5 to 3.4)     | -17.2% (-32 to 2.1)     | 4% (-0.8 to 9.5)        | 7.9% (1.1 to 15.8)      | 9.3% (2.8 to 16.2)      |
|                      | Lebanon                      | -5.3% (-24.6 to 18.3)   | -4.5% (-23.2 to 17.8)   | -9.5% (-12.9 to -5.7)   | -4.6% (-9.3 to 0.2)     | -4.4% (-12.1 to 3)      |
|                      | Libya                        | 0.2% (-22.5 to 30.2)    | 0.4% (-20.6 to 30.4)    | 1.1% (-3.8 to 5.6)      | 34.1% (27.3 to 41.4)    | 35.7% (27 to 49.3)      |
|                      | Morocco                      | -14.2% (-34.9 to 14.6)  | -8.8% (-26.8 to 16.5)   | 0.7% (-3.6 to 5.3)      | -1.5% (-6.5 to 3.1)     | 1.4% (-4.8 to 7.7)      |
|                      | Oman                         | -10.2% (-26.4 to 8.4)   | -12.7% (-28.3 to 5.2)   | -17% (-20.8 to -13.3)   | -6.2% (-13 to 0.4)      | -4.9% (-13.3 to 2.8)    |
|                      | Palestine                    | -18.3% (-33.4 to -1.9)  | -17.2% (-33.6 to 1.4)   | 1.8% (-2.4 to 6.3)      | -0.7% (-5.9 to 4.7)     | -4.3% (-13.3 to 4.3)    |
|                      | Qatar                        | -12% (-31.2 to 12.3)    | -16.3% (-39.8 to 14.8)  | 1.7% (-2.9 to 6.2)      | 8.4% (-1.2 to 18.4)     | 11.4% (4.5 to 18.3)     |
|                      | Saudi Arabia                 | -8.1% (-26.1 to 12.8)   | -8.4% (-27 to 14.1)     | -2.5% (-6.6 to 2)       | -1.4% (-7.7 to 6)       | -2.6% (-10.9 to 5.5)    |
|                      | Sudan                        | -7.9% (-35.9 to 32.6)   | -6.3% (-29.6 to 25.7)   | 2% (-2.3 to 6.6)        | 1.1% (-4.9 to 7.6)      | 3.6% (-3.1 to 10.6)     |
|                      | Syrian Arab Republic         | 2.4% (-17.6 to 26.5)    | 3.4% (-18.3 to 30)      | 1.9% (-2.5 to 6.4)      | 8.2% (3.3 to 13.7)      | 8.2% (2.4 to 14.4)      |
|                      | Tunisia                      | -8% (-29.1 to 18.1)     | -8.3% (-30.3 to 20.3)   | 2.2% (-2.4 to 7.1)      | 2.6% (-2.1 to 7.3)      | 3.9% (-2.5 to 9.6)      |
| Turkey               | -19.5% (-37.3 to 0.7)        | -20.1% (-36.4 to 0.4)   | 25.3% (17.3 to 33.5)    | 15.4% (8.7 to 22.1)     | 10.7% (-1.7 to 22.7)    |                         |
| United Arab Emirates | -7.7% (-28 to 19.1)          | -10.4% (-29.4 to 15.6)  | 2.6% (-2.6 to 8)        | -0.9% (-8.1 to 6.6)     | -0.5% (-6.9 to 6.2)     |                         |
| Yemen                | -7.5% (-33.7 to 28.6)        | -5.3% (-29.1 to 24)     | 2.6% (-1.7 to 7.9)      | 20.8% (13.6 to 28.2)    | 19.1% (11.9 to 27.1)    |                         |
| Tetanus              | Global                       | -49.9% (-61.7 to -36)   | -48.7% (-59.2 to -36.5) | -48.9% (-59.4 to -36.9) | -24.4% (-27.4 to -22)   | -33.4% (-40.9 to -27.5) |
|                      | North Africa and Middle East | -59% (-75.1 to -37.1)   | -57.8% (-72.1 to -42.3) | -56.1% (-70.3 to -40.6) | -23% (-32.5 to -15.6)   | -42.4% (-56.9 to -27.8) |
|                      | Afghanistan                  | -68.3% (-81.8 to -50.4) | -65.7% (-77.7 to -48.8) | -64.7% (-77.1 to -46.9) | -39.4% (-51.3 to -28.6) | -58% (-70.5 to -41.7)   |
|                      | Algeria                      | -36.3% (-55.8 to -2.8)  | -35% (-51.2 to -7.9)    | -32.8% (-49.4 to -5.1)  | -6.1% (-17.1 to 5.1)    | -15.6% (-31 to -1.3)    |
|                      | Bahrain                      | -0.9% (-16.8 to 14.4)   | -2.5% (-19.1 to 15.7)   | -1.5% (-19 to 16.9)     | 0.2% (-4.4 to 5)        | -0.7% (-8.4 to 5.4)     |

**Table S33** Temporal changes in the age-standardised rate of DALYs, mortality, incidence, prevalence, and YLDs of neurological conditions in North Africa and Middle East and the world from 2010 to 2019

| Condition                               | Location                     | DALYs                   | Deaths                  | Incidence               | Prevalence              | YLDs                    |
|-----------------------------------------|------------------------------|-------------------------|-------------------------|-------------------------|-------------------------|-------------------------|
|                                         | Egypt                        | -41.5% (-71.1 to 0.5)   | -39% (-65 to -0.5)      | -37.6% (-64.8 to 2.4)   | -15.8% (-27.2 to -3.8)  | -25.2% (-42 to -2.9)    |
|                                         | Iran                         | -43% (-56.5 to -20.9)   | -39.1% (-51.5 to -21.5) | -38.4% (-51 to -20.7)   | -5.6% (-13.4 to 0.7)    | -19.6% (-31.9 to -9.4)  |
|                                         | Iraq                         | -68.5% (-82.4 to -41.6) | -66% (-78.9 to -42.9)   | -65.2% (-78.8 to -41.2) | -35.5% (-43.1 to -26.4) | -44.5% (-56.9 to -31.3) |
|                                         | Jordan                       | -12.8% (-32.8 to 17.3)  | -14.5% (-32.9 to 9.8)   | -12% (-30.8 to 12)      | 0.5% (-7.5 to 9.9)      | -2% (-12.2 to 7)        |
|                                         | Kuwait                       | -1.1% (-47.8 to 142.5)  | -6.5% (-53.3 to 180.1)  | -5.6% (-53.9 to 182.8)  | -0.5% (-6.1 to 5)       | -1.3% (-10.6 to 7.4)    |
|                                         | Lebanon                      | -28.5% (-62.9 to 13.4)  | -35.5% (-62 to -9.5)    | -34% (-61.6 to -6.4)    | -26.5% (-46.8 to -3.7)  | -32.4% (-56.2 to -5.8)  |
|                                         | Libya                        | -1.5% (-28.9 to 47.2)   | -0.9% (-26.5 to 39.2)   | -1.6% (-26.9 to 36.8)   | 0.1% (-8.4 to 8.9)      | -0.9% (-13.2 to 15.4)   |
|                                         | Morocco                      | -57.4% (-82.8 to -8)    | -53.6% (-79.9 to -10.9) | -52.7% (-79.3 to -4.7)  | -21.8% (-32.2 to -11)   | -34.9% (-59.6 to -5.2)  |
|                                         | Oman                         | -25.1% (-40.6 to -8.2)  | -35.5% (-53 to -9.1)    | -33.4% (-51.5 to -7.3)  | -1.4% (-9.2 to 7.5)     | -12.3% (-27.7 to 0.9)   |
|                                         | Palestine                    | -36.7% (-54.2 to -7.4)  | -37.8% (-52.1 to -19.3) | -35.6% (-50.4 to -17.9) | -8.9% (-20.8 to 4.2)    | -15.9% (-29.6 to -2.7)  |
|                                         | Qatar                        | -12.2% (-29.1 to 6.1)   | -17.1% (-35.5 to 8.6)   | -15.5% (-33.7 to 8.5)   | -1% (-6.9 to 4.8)       | -7.2% (-18.3 to 4.1)    |
|                                         | Saudi Arabia                 | -37.1% (-61.9 to -4.2)  | -40.2% (-62.2 to -9.7)  | -37.9% (-61.2 to -5)    | -3.5% (-17.4 to 9.5)    | -18.2% (-35 to -0.6)    |
|                                         | Sudan                        | -66.4% (-81.1 to -37.7) | -62.8% (-76.6 to -41.2) | -61.8% (-75.7 to -40.2) | -31.7% (-41.2 to -21.6) | -44.8% (-59.3 to -29.3) |
|                                         | Syrian Arab Republic         | -11.2% (-46.5 to 53.6)  | -14.9% (-45.3 to 32.7)  | -14.1% (-45.3 to 36.7)  | -0.1% (-7.6 to 8.1)     | -4% (-16.9 to 13.4)     |
|                                         | Tunisia                      | -26.2% (-49 to 3.2)     | -27.1% (-46.7 to -1)    | -24.7% (-45.3 to 0)     | -1.2% (-10.5 to 7.3)    | -8.6% (-21.8 to 2.8)    |
|                                         | Turkey                       | -43.1% (-58.5 to -23.3) | -44.2% (-57.2 to -26.4) | -42.4% (-55.7 to -24.3) | 3.2% (-8 to 15.1)       | -8.4% (-22.6 to 4.6)    |
|                                         | United Arab Emirates         | -55.8% (-70.9 to -31.9) | -56.7% (-72.1 to -30.6) | -55.9% (-71.4 to -28.2) | -51.1% (-65.6 to -23.4) | -51.8% (-69.9 to -22.4) |
|                                         | Yemen                        | -37.3% (-63.8 to 27.1)  | -32.6% (-56.1 to 14.4)  | -32.2% (-56.8 to 16.3)  | -17.3% (-27.2 to -6.7)  | -23.9% (-41.8 to 0.5)   |
| Brain and central nervous system cancer | Global                       | -4% (-15 to 4.1)        | -2.6% (-11.6 to 4)      | 2.1% (-8.9 to 10.8)     | 12% (-1.2 to 22.2)      | 5.9% (-6.1 to 15.2)     |
|                                         | North Africa and Middle East | 0.5% (-14.9 to 11.5)    | 4.3% (-11.6 to 15.5)    | 13.6% (-4.5 to 26.1)    | 35.6% (12.9 to 52.4)    | 22.3% (2.5 to 37.9)     |
|                                         | Afghanistan                  | -3.4% (-21.7 to 24.1)   | -1.3% (-18.9 to 23.3)   | -0.6% (-18.3 to 24.7)   | 2.8% (-17.3 to 32.8)    | 0.3% (-17.6 to 26.3)    |
|                                         | Algeria                      | -5.6% (-23.2 to 16.5)   | -4.2% (-21.5 to 18.9)   | 7.9% (-12.6 to 34.1)    | 34.5% (5.6 to 70.9)     | 19.1% (-5.2 to 49.9)    |
|                                         | Bahrain                      | -7.4% (-24.2 to 12.8)   | -9.7% (-27.7 to 11.8)   | 4.5% (-15.9 to 28.4)    | 29.9% (4.3 to 60.5)     | 15.6% (-9.2 to 46)      |
|                                         | Egypt                        | -7.6% (-30.4 to 17.4)   | -7.7% (-31.3 to 17.8)   | -0.6% (-25.4 to 27)     | 21% (-10.6 to 57)       | 6.5% (-19.5 to 35.9)    |
|                                         | Iran                         | 5.1% (-25.1 to 17.2)    | 14% (-16.3 to 27.4)     | 27.1% (-7.7 to 43.2)    | 52.7% (9.1 to 82.4)     | 38% (-0.2 to 59.3)      |
|                                         | Iraq                         | 10.7% (-22.1 to 43)     | 15.9% (-16.4 to 50.4)   | 24.9% (-10.8 to 61)     | 51.2% (6.3 to 99.7)     | 32.6% (-7.2 to 75.8)    |
|                                         | Jordan                       | -4.1% (-20.2 to 14.4)   | -4.4% (-20.8 to 13.7)   | 8.3% (-9.5 to 29.2)     | 35.4% (11 to 64.4)      | 19.2% (-3.7 to 46.4)    |
|                                         | Kuwait                       | -8.3% (-24.8 to 11.5)   | -7.9% (-24.4 to 12.2)   | 9.8% (-10 to 35.2)      | 29.9% (3.7 to 64.8)     | 20.6% (-5.3 to 53.4)    |
|                                         | Lebanon                      | -0.6% (-18 to 18)       | -1.4% (-17 to 16.3)     | 17.4% (-2.6 to 39.8)    | 39.8% (11.4 to 75.7)    | 28.2% (1.7 to 61)       |
|                                         | Libya                        | -4% (-21.7 to 17.8)     | -0.9% (-19.7 to 21.8)   | -3.9% (-22 to 17.4)     | -9.6% (-28.1 to 14.8)   | -5.8% (-26.4 to 20.2)   |
|                                         | Morocco                      | -4% (-25.7 to 20.9)     | 0% (-19.9 to 24.8)      | 6.4% (-16.4 to 33.5)    | 27.1% (-6.6 to 65.7)    | 13.5% (-11.8 to 43.9)   |
|                                         | Oman                         | -14.2% (-33.8 to 4)     | -14.3% (-31.8 to 4.2)   | -1.1% (-22.5 to 20.4)   | 21.5% (-6.3 to 51.3)    | 8.8% (-18.6 to 38.9)    |
|                                         | Palestine                    | 8% (-10.7 to 28.2)      | 8.6% (-10.4 to 28.1)    | 19.1% (-1.6 to 40.2)    | 49.9% (22.5 to 81.2)    | 29.6% (1.6 to 61)       |
|                                         | Qatar                        | -13.9% (-33.4 to 11.3)  | -12.7% (-31.8 to 11.5)  | 0.8% (-22.1 to 28.6)    | 18.9% (-9.7 to 53.3)    | 10.7% (-18 to 47.6)     |
|                                         | Saudi Arabia                 | -11.9% (-30.1 to 9.9)   | -16.6% (-35.1 to 7.3)   | 5.8% (-17 to 33.1)      | 49.3% (15.8 to 92)      | 25.2% (-4.2 to 61.4)    |
|                                         | Sudan                        | -2.2% (-24.9 to 25.7)   | 0.7% (-18.6 to 26.2)    | 5.4% (-16.4 to 32.9)    | 21% (-10 to 58.9)       | 10.3% (-14 to 39.4)     |
|                                         | Syrian Arab Republic         | 0.6% (-22.2 to 28.5)    | 0% (-22.9 to 27.6)      | 4% (-19 to 33.4)        | 12.5% (-13.2 to 46.9)   | 6.7% (-17.7 to 40.5)    |
|                                         | Tunisia                      | -4.6% (-26.1 to 22)     | -2.4% (-24.3 to 26.2)   | 10.9% (-13.7 to 43)     | 32.8% (0.9 to 73.2)     | 21.9% (-7 to 58.6)      |
|                                         | Turkey                       | -0.1% (-22.3 to 22.5)   | 4.1% (-21 to 29.8)      | 15.5% (-11 to 41.6)     | 35.9% (4.3 to 69.7)     | 25.1% (-4.5 to 59.6)    |
|                                         | United Arab Emirates         | -2.1% (-24 to 22.6)     | -4% (-29.9 to 22.6)     | 3.8% (-21.5 to 30.2)    | 22.5% (-4.9 to 56.2)    | 10.3% (-16.8 to 42.2)   |
|                                         | Yemen                        | 4.2% (-15.8 to 30.3)    | 6% (-12.6 to 29)        | 7% (-12.4 to 30.4)      | 10.5% (-12.4 to 39.4)   | 8.3% (-12 to 32.5)      |
| Stroke*                                 | Global                       | -13.7% (-18.6 to -8.5)  | -14.7% (-19.8 to -9.6)  | -1.5% (-3.3 to 0.4)     | 1.9% (0.6 to 3.2)       | 2.3% (0.8 to 3.8)       |
|                                         | North Africa and Middle East | -12% (-17.7 to -5.8)    | -11.8% (-17.8 to -5.5)  | -0.2% (-2.8 to 2.4)     | -0.1% (-1.5 to 1.1)     | -0.3% (-2 to 1.2)       |
|                                         | Afghanistan                  | -12.7% (-26.4 to 1.7)   | -10.4% (-24 to 4.8)     | -3.8% (-8 to 0.6)       | -0.6% (-4.5 to 3.3)     | -0.7% (-5.2 to 3.9)     |
|                                         | Algeria                      | -12.6% (-25.7 to 2.5)   | -11.9% (-25.6 to 3.3)   | -2.6% (-8.8 to 3.7)     | -2.5% (-6.6 to 1.6)     | -2.7% (-7.5 to 2.4)     |
|                                         | Bahrain                      | -21.9% (-31.7 to -11.2) | -24.8% (-35.4 to -13.5) | -8.9% (-14 to -3.5)     | -5.3% (-9.3 to -1.3)    | -6% (-10.6 to -1.2)     |
|                                         | Egypt                        | -11.8% (-28.7 to 8.1)   | -9.9% (-28.1 to 11.4)   | 2.1% (-4.2 to 8.4)      | 2.3% (-2.2 to 6.7)      | 2.1% (-2.8 to 7.3)      |
|                                         | Iran                         | -14.7% (-18.7 to -10.5) | -15.9% (-20.3 to -11)   | -1.8% (-4.5 to 0.8)     | -0.8% (-2.7 to 0.9)     | -1% (-3 to 0.8)         |
|                                         | Iraq                         | -9.2% (-21.7 to 5.2)    | -6% (-18.8 to 8.7)      | -2.2% (-8.7 to 4.4)     | -1.3% (-5.2 to 2.7)     | -1.1% (-6 to 3.7)       |



**Table S33** Temporal changes in the age-standardised rate of DALYs, mortality, incidence, prevalence, and YLDs of neurological conditions in North Africa and Middle East and the world from 2010 to 2019

| Condition                 | Location                     | DALYs                   | Deaths                  | Incidence               | Prevalence              | YLDs                   |
|---------------------------|------------------------------|-------------------------|-------------------------|-------------------------|-------------------------|------------------------|
|                           | Jordan                       | -11.8% (-22.9 to 0.5)   | -13% (-25.3 to 0.9)     | -10.4% (-17.4 to -3.5)  | -4.1% (-9.1 to 2.3)     | -4.3% (-10 to 2.7)     |
|                           | Kuwait                       | -20.5% (-31.2 to -8.6)  | -20% (-32.4 to -6.2)    | -10.7% (-16.9 to -2.9)  | -12% (-16.6 to -7.1)    | -12% (-17.4 to -6.4)   |
|                           | Lebanon                      | -7.6% (-16.6 to 2.1)    | -13.6% (-25.3 to -0.8)  | 6.9% (0.4 to 14.1)      | 5.6% (1.4 to 10.3)      | 5.6% (0.6 to 11.4)     |
|                           | Libya                        | 0.4% (-15.3 to 20.2)    | 1.1% (-17 to 22.1)      | 4.1% (-1.8 to 10.1)     | 1.3% (-2.8 to 5.3)      | 0.7% (-4.1 to 5.9)     |
|                           | Morocco                      | -4.7% (-19.2 to 12.8)   | 1.1% (-14.8 to 22.4)    | -0.3% (-6.8 to 5.8)     | 0.4% (-3.7 to 4.8)      | 0.4% (-4.5 to 5.6)     |
|                           | Oman                         | -26.8% (-34.3 to -19)   | -19.3% (-28.4 to -10.3) | -4.5% (-10.7 to 1.6)    | -6.4% (-10.3 to -2.1)   | -5.8% (-10.6 to -1)    |
|                           | Palestine                    | -9.8% (-21.8 to 2.1)    | -7.7% (-20.8 to 4.5)    | 8.1% (0.7 to 15.4)      | 6.6% (0.9 to 12.2)      | 7.1% (0.7 to 13.2)     |
|                           | Qatar                        | -24.7% (-36.8 to -12)   | -19.3% (-34.1 to -3.3)  | -17.9% (-22.9 to -11.4) | -13% (-16.7 to -9.6)    | -13.6% (-18.2 to -9.2) |
|                           | Saudi Arabia                 | -19.5% (-31.7 to -6.9)  | -19.8% (-32.9 to -7.5)  | -4.6% (-10 to 1.6)      | -0.8% (-4.8 to 3.3)     | -1.5% (-6.4 to 3.2)    |
|                           | Sudan                        | -12.1% (-24.1 to 2.4)   | -9.6% (-21.1 to 7.7)    | -1.8% (-7.1 to 4.3)     | -0.7% (-4.9 to 3.4)     | -0.6% (-5.1 to 4)      |
|                           | Syrian Arab Republic         | -0.5% (-19.6 to 22.8)   | -1.6% (-20 to 21.6)     | 1.2% (-4.6 to 7)        | -0.3% (-4.1 to 3.8)     | -1.1% (-6.1 to 3.9)    |
|                           | Tunisia                      | -12.2% (-29.3 to 7.7)   | -13.4% (-31.2 to 7.6)   | 1.7% (-4.4 to 8.1)      | 1.5% (-3 to 6.2)        | 1.3% (-3.9 to 6.8)     |
|                           | Turkey                       | -18.3% (-32.5 to -1.2)  | -19.5% (-34.8 to -1.7)  | 0.4% (-4.4 to 5.9)      | -3.5% (-7.4 to 0.4)     | -3.1% (-7.9 to 2.1)    |
|                           | United Arab Emirates         | -30.6% (-40.6 to -18.9) | -37.9% (-47.8 to -26.9) | -6.5% (-12.5 to 0.1)    | -2.9% (-7.3 to 1.5)     | -3.6% (-8.5 to 1.6)    |
|                           | Yemen                        | -2.4% (-15.4 to 14.2)   | -2.2% (-15 to 14.6)     | -2.9% (-8 to 2.1)       | -3.1% (-7.2 to 1.2)     | -3.1% (-8 to 2.1)      |
| Ischaemic stroke          | Global                       | -8.3% (-13.1 to -3.6)   | -10.4% (-15.4 to -5.4)  | 2.7% (0.1 to 5.4)       | 3.6% (2 to 5.4)         | 4.3% (2.5 to 6.4)      |
|                           | North Africa and Middle East | -7.2% (-12.7 to -1.2)   | -8.3% (-14.6 to -1.7)   | 2.5% (-1.2 to 6)        | 0.8% (-0.7 to 2)        | 0.6% (-1.2 to 2.4)     |
|                           | Afghanistan                  | -3.4% (-17 to 13.2)     | -2.5% (-16.4 to 14.6)   | 3.1% (-3.6 to 10.1)     | 2.7% (-1.6 to 6.6)      | 2.5% (-3.1 to 7.9)     |
|                           | Algeria                      | -8.5% (-21.8 to 6.8)    | -8.7% (-22.9 to 7.3)    | -0.4% (-8.5 to 8)       | -1.4% (-5.8 to 3)       | -1.8% (-7.3 to 4.3)    |
|                           | Bahrain                      | -20.4% (-29.8 to -10.5) | -23.8% (-34.8 to -12.1) | -8.8% (-15.6 to -1.3)   | -5.4% (-9.6 to -1.5)    | -6% (-11.5 to -0.4)    |
|                           | Egypt                        | -4.2% (-21.3 to 16.5)   | -5.1% (-23.5 to 17)     | 5.2% (-3.3 to 13.6)     | 3.6% (-1 to 8.3)        | 3.2% (-2.6 to 9.1)     |
|                           | Iran                         | -13.4% (-17.6 to -9)    | -14.9% (-19.5 to -9.8)  | 0.9% (-2.2 to 4.1)      | -1% (-3 to 0.8)         | -1% (-3.3 to 1.2)      |
|                           | Iraq                         | -3.8% (-16.2 to 11.1)   | -1.3% (-14.1 to 14.9)   | 0.8% (-8.1 to 10.1)     | -0.4% (-5.1 to 4.1)     | -0.2% (-5.9 to 5.6)    |
|                           | Jordan                       | -10.6% (-21.2 to 1.4)   | -12% (-24.4 to 2)       | -11.3% (-19.5 to -2.7)  | -4.4% (-10.3 to 3)      | -4.5% (-10.8 to 3.5)   |
|                           | Kuwait                       | -24.4% (-34.5 to -13.5) | -24.1% (-36.9 to -10.6) | -13.9% (-21.7 to -4.4)  | -14.2% (-19 to -9.1)    | -14.1% (-20.2 to -7.6) |
|                           | Lebanon                      | -5.7% (-14.9 to 4.5)    | -11.9% (-24.3 to 1.5)   | 7.3% (-0.7 to 16)       | 6% (1.6 to 10.5)        | 5.9% (0.1 to 12.5)     |
|                           | Libya                        | 2.9% (-13.2 to 22.2)    | 1.9% (-16.1 to 23)      | 4.9% (-2.7 to 12.6)     | 1.7% (-2.7 to 6)        | 1.1% (-4.5 to 7)       |
|                           | Morocco                      | 2% (-12.6 to 19.4)      | 6.9% (-10.1 to 28.6)    | 2.7% (-6 to 10.9)       | 1.9% (-2.3 to 6.3)      | 1.9% (-3.6 to 7.7)     |
|                           | Oman                         | -20.8% (-29.2 to -11.4) | -13.7% (-24.1 to -2.7)  | -2.2% (-10.3 to 5.8)    | -5.2% (-9.4 to -0.9)    | -4.6% (-10 to 1.3)     |
|                           | Palestine                    | 8.8% (-6 to 23.5)       | 11.1% (-5.5 to 27.4)    | 17.9% (7.7 to 27.9)     | 11.7% (5.5 to 18.1)     | 12% (4 to 19.5)        |
|                           | Qatar                        | -21.4% (-33.2 to -8.4)  | -16.1% (-32.3 to 1.4)   | -18.7% (-25.9 to -10)   | -13.6% (-17.3 to -10.1) | -14.2% (-19.5 to -9.1) |
|                           | Saudi Arabia                 | -15.6% (-28.1 to -3.7)  | -16.4% (-30.2 to -3.7)  | -2.7% (-10.2 to 6)      | -0.5% (-5.3 to 4)       | -1.1% (-6.9 to 5)      |
|                           | Sudan                        | -3.6% (-15.5 to 11.8)   | -2.8% (-15.2 to 13.9)   | 2.7% (-4.7 to 11.2)     | 1.7% (-2.8 to 6)        | 1.7% (-3.8 to 7.4)     |
|                           | Syrian Arab Republic         | 1.2% (-16.6 to 23.4)    | -0.5% (-19.1 to 21.7)   | 3.3% (-4.8 to 11.6)     | 0.6% (-3.4 to 5.2)      | -0.3% (-5.7 to 5.9)    |
|                           | Tunisia                      | -8.9% (-26.3 to 11)     | -10.9% (-28.7 to 10.7)  | 3.3% (-4.6 to 11.8)     | 2.1% (-2.4 to 6.6)      | 1.9% (-4.1 to 8.1)     |
|                           | Turkey                       | -16.1% (-29.9 to 0.1)   | -18.6% (-34.6 to -0.6)  | 1.8% (-5.3 to 9.9)      | -3.1% (-7.2 to 0.7)     | -2.8% (-9.1 to 3.1)    |
|                           | United Arab Emirates         | -31% (-40.4 to -20.1)   | -38% (-47.8 to -27.5)   | -5.8% (-13.2 to 2.6)    | -3.1% (-7.8 to 1.5)     | -3.5% (-9.2 to 2.3)    |
|                           | Yemen                        | 2.2% (-10.8 to 18.4)    | 1.8% (-11.7 to 19.3)    | 0.4% (-7 to 7.4)        | -1.3% (-5.6 to 3.5)     | -1.5% (-7.2 to 4.7)    |
| Intracerebral haemorrhage | Global                       | -18.6% (-24 to -12.9)   | -19.6% (-25.1 to -13.9) | -9.2% (-11.6 to -7.2)   | -2.9% (-3.8 to -2.1)    | -3.6% (-4.7 to -2.5)   |
|                           | North Africa and Middle East | -19.1% (-25.5 to -11.6) | -19.1% (-25.3 to -12.1) | -8.4% (-10.9 to -6.1)   | -4.4% (-5.9 to -2.9)    | -4.6% (-7.6 to -1.8)   |
|                           | Afghanistan                  | -21.6% (-35.3 to -5.4)  | -20.4% (-34 to -4.1)    | -15% (-19.2 to -10.7)   | -10.2% (-15.5 to -3.9)  | -10.3% (-18.9 to -0.6) |
|                           | Algeria                      | -21.9% (-35.6 to -5.9)  | -21.9% (-36.3 to -5.1)  | -11.6% (-16.7 to -6.2)  | -8.8% (-12.1 to -5.4)   | -8.8% (-17.6 to 0.6)   |
|                           | Bahrain                      | -26.1% (-37.2 to -12.6) | -28.3% (-39.9 to -14.8) | -15.4% (-21.3 to -9.3)  | -7.8% (-11.5 to -3.8)   | -8.5% (-18.2 to 1.5)   |
|                           | Egypt                        | -21.9% (-39.8 to 0.3)   | -19.9% (-38.5 to 2.5)   | -7.8% (-12.6 to -2.1)   | -4.3% (-8.1 to 0)       | -4.4% (-13.8 to 6)     |
|                           | Iran                         | -18.6% (-23.2 to -13.9) | -19% (-23.8 to -13.6)   | -17.2% (-20.3 to -14)   | -3.8% (-5.8 to -1.7)    | -4.2% (-7.4 to -0.9)   |
|                           | Iraq                         | -15.3% (-29.4 to 2)     | -13.7% (-27.8 to 2.4)   | -7.7% (-12.6 to -2.7)   | -3.8% (-7 to 0.2)       | -4.1% (-12.7 to 4.6)   |
|                           | Jordan                       | -15.9% (-28.8 to -0.4)  | -16.5% (-30 to -1)      | -13.7% (-20 to -7.2)    | -5% (-9.5 to -0.7)      | -5.5% (-14.7 to 5.2)   |
|                           | Kuwait                       | -10.9% (-26.4 to 6)     | -5.4% (-24.3 to 14.1)   | -8.9% (-16.2 to -0.2)   | -5.8% (-10.2 to -1.1)   | -5.3% (-15.5 to 5.1)   |
|                           | Lebanon                      | -14.6% (-25.9 to -2.2)  | -21.1% (-32.3 to -8.5)  | -1.1% (-7.7 to 5.4)     | 2.6% (-1.2 to 6.4)      | 2.2% (-8.5 to 13.7)    |
|                           | Libya                        | -5.2% (-22.6 to 16.4)   | -1.7% (-19.6 to 21.3)   | -1.1% (-7.4 to 5.4)     | -2% (-5.2 to 1.4)       | -2.5% (-11.9 to 7.7)   |
|                           | Morocco                      | -17% (-31.6 to 1.8)     | -12.8% (-28.3 to 8.3)   | -9.2% (-14 to -3.5)     | -6.6% (-10 to -2.8)     | -6.7% (-16 to 3.6)     |

**Table S33** Temporal changes in the age-standardised rate of DALYs, mortality, incidence, prevalence, and YLDs of neurological conditions in North Africa and Middle East and the world from 2010 to 2019

| Condition                | Location                     | DALYs                   | Deaths                  | Incidence               | Prevalence              | YLDs                   |
|--------------------------|------------------------------|-------------------------|-------------------------|-------------------------|-------------------------|------------------------|
|                          | Oman                         | -38.5% (-46 to -30.6)   | -32.3% (-40.6 to -23.3) | -13.8% (-19.5 to -8.1)  | -12.8% (-17.1 to -8.1)  | -12.7% (-21.4 to -3.7) |
|                          | Palestine                    | -41.9% (-51.4 to -31.4) | -44.6% (-53.5 to -34.4) | -24.7% (-29.5 to -19.7) | -19.8% (-26.1 to -14.5) | -20% (-29.2 to -9.7)   |
|                          | Qatar                        | -32.6% (-45.3 to -17.5) | -27.9% (-42.6 to -10.3) | -20.4% (-26.5 to -14.5) | -13.6% (-17.4 to -10)   | -13.9% (-22.9 to -3.6) |
|                          | Saudi Arabia                 | -25.3% (-38.4 to -10.3) | -26.4% (-38.7 to -12.9) | -12.5% (-17.9 to -7.1)  | -2.8% (-8 to 3)         | -3.5% (-11.1 to 6)     |
|                          | Sudan                        | -24.8% (-36.8 to -9.3)  | -23.3% (-35 to -7.9)    | -13.7% (-17.9 to -9.1)  | -11% (-14.1 to -7.6)    | -10.8% (-19.1 to -2)   |
|                          | Syrian Arab Republic         | -2% (-25.3 to 25.4)     | -3.2% (-25.1 to 23)     | -4.6% (-9.9 to 0.8)     | -4.7% (-8.2 to -0.8)    | -5.1% (-13.9 to 4.6)   |
|                          | Tunisia                      | -20.3% (-37.8 to 1.9)   | -21.4% (-38.1 to 1.3)   | -5.8% (-12.1 to 0.4)    | -4.2% (-8.4 to 0.1)     | -4.3% (-15.2 to 8.4)   |
|                          | Turkey                       | -21.7% (-37.5 to -2)    | -21.7% (-37.3 to -2.1)  | -1.8% (-8.5 to 5.9)     | -4.2% (-8.2 to 0)       | -4% (-13.1 to 5.8)     |
|                          | United Arab Emirates         | -30.2% (-43.4 to -14.8) | -38.1% (-49.6 to -24.5) | -11% (-16.6 to -5.2)    | -4% (-8.4 to 0.4)       | -4.8% (-13.8 to 5)     |
|                          | Yemen                        | -10% (-25.1 to 8.1)     | -10.7% (-24.1 to 6.8)   | -11.3% (-15.8 to -6.6)  | -11% (-14.9 to -7.1)    | -11.2% (-19.7 to -1.9) |
| Subarachnoid haemorrhage | Global                       | -11.5% (-18.9 to -3.1)  | -11.5% (-19.3 to -2.5)  | -3.8% (-6.2 to -1.3)    | -1.6% (-2.3 to -0.8)    | -2.2% (-3.3 to -1)     |
|                          | North Africa and Middle East | -22.5% (-32.5 to -11.3) | -22% (-32.4 to -9.7)    | -4.1% (-7.5 to -0.6)    | -1.7% (-4 to 0)         | -1.8% (-6.6 to 3.3)    |
|                          | Afghanistan                  | -20.8% (-36.3 to 3.7)   | -20.9% (-36.8 to 6.6)   | -10.9% (-15.9 to -5.4)  | -7.8% (-12.1 to -3.3)   | -7.9% (-20.1 to 6.7)   |
|                          | Algeria                      | -22.1% (-38.2 to -1.1)  | -23.7% (-41.3 to -0.9)  | -4.4% (-10.3 to 1.9)    | -2.5% (-9.6 to 2.1)     | -2.4% (-16.8 to 14.7)  |
|                          | Bahrain                      | -16.8% (-30.4 to -0.3)  | -19% (-34.8 to -0.4)    | 8.3% (-1.4 to 20.7)     | 3.7% (-0.4 to 8.5)      | 3.4% (-10.8 to 19.7)   |
|                          | Egypt                        | -28.8% (-47.4 to -4.4)  | -25.9% (-44.1 to -2.4)  | -5.2% (-11.7 to 1.5)    | -2.6% (-7.2 to 2.1)     | -2.5% (-16.3 to 12.8)  |
|                          | Iran                         | -20.9% (-32.2 to -6.9)  | -24.8% (-37.3 to -9.7)  | -0.3% (-4 to 4)         | 8% (6.2 to 10)          | 7.3% (2.8 to 11.9)     |
|                          | Iraq                         | -35.3% (-48.9 to -17.4) | -38.1% (-52.6 to -16.5) | -17.6% (-23.7 to -11.1) | -8.9% (-13 to -4.2)     | -8.7% (-21.2 to 6.1)   |
|                          | Jordan                       | -11.6% (-25.2 to 4.8)   | -17.8% (-33.7 to 1.6)   | 12.6% (0.7 to 22.5)     | 5.2% (0.3 to 9.5)       | 4.6% (-10.7 to 22.3)   |
|                          | Kuwait                       | -6.4% (-21.3 to 9.3)    | -7% (-24.4 to 13.3)     | 16.2% (4.5 to 31.1)     | 8.1% (-3 to 13.4)       | 8.4% (-7 to 24.9)      |
|                          | Lebanon                      | -12.2% (-25.6 to 3.3)   | -21.8% (-38.3 to -3.7)  | 17.3% (5.2 to 30.5)     | 7.7% (2.8 to 13)        | 7.6% (-7.5 to 25.4)    |
|                          | Libya                        | -6.4% (-27.9 to 21.6)   | -0.6% (-25.4 to 31.9)   | 5.9% (-1 to 14.9)       | 2.8% (-2 to 7.6)        | 2.8% (-11.7 to 19.3)   |
|                          | Morocco                      | -22.3% (-37.6 to -0.1)  | -19.1% (-36.3 to 7.9)   | -8.1% (-14.6 to -1.4)   | -5.9% (-16.9 to -0.6)   | -6.7% (-21.5 to 9.6)   |
|                          | Oman                         | -28.1% (-40.7 to -9)    | -27.1% (-40.9 to -10.4) | -2.6% (-9.5 to 4.2)     | -3.4% (-12 to 1.3)      | -4.4% (-17.8 to 9.6)   |
|                          | Palestine                    | -15.2% (-31.9 to 3.9)   | -19.4% (-37.6 to 4)     | 7.3% (0.3 to 17.7)      | 4.4% (0.1 to 9.1)       | 4.2% (-12.2 to 22)     |
|                          | Qatar                        | -19.7% (-36.8 to 2.1)   | -16.6% (-36.6 to 11)    | -7% (-13.7 to 0.7)      | -3.5% (-8.3 to 1.9)     | -2.6% (-18 to 13.7)    |
|                          | Saudi Arabia                 | -19.9% (-37.3 to -0.7)  | -23.5% (-42.6 to -2.9)  | 7.5% (-2.2 to 21.3)     | 3.2% (-0.9 to 7.6)      | 2.5% (-11.3 to 18.1)   |
|                          | Sudan                        | -24.3% (-41.3 to -0.8)  | -24.8% (-42.1 to -1.2)  | -8.7% (-14.5 to -2.2)   | -5.4% (-9.3 to -1.4)    | -5.1% (-20.2 to 10.7)  |
|                          | Syrian Arab Republic         | -5.2% (-23 to 16.6)     | -2.2% (-23.2 to 22.8)   | 5.2% (-2.6 to 13.3)     | 3.1% (-1.1 to 7.9)      | 3.5% (-11 to 20.5)     |
|                          | Tunisia                      | -20.6% (-38.9 to 2.4)   | -23.7% (-42.9 to 1.9)   | 2.1% (-4.5 to 9.5)      | 2% (-2.2 to 6.2)        | 1.7% (-13.8 to 19.4)   |
|                          | Turkey                       | -18% (-35.8 to 4.8)     | -16.8% (-36 to 7.8)     | -3.3% (-10 to 4.7)      | -3% (-7 to 1)           | -3% (-17 to 14.2)      |
|                          | United Arab Emirates         | -25.4% (-40.9 to -5)    | -34.5% (-50.2 to -13.6) | -2% (-8.8 to 5.2)       | -0.7% (-6 to 3.4)       | -0.3% (-13.6 to 15.6)  |
|                          | Yemen                        | -4.5% (-24.4 to 21.2)   | -4.8% (-23.8 to 21.5)   | -6.8% (-13.1 to -0.1)   | -3.8% (-8.4 to 0.5)     | -3.4% (-17.1 to 12.5)  |
| Neurological disorders†  | Global                       | -0.4% (-2.6 to 1.7)     | -1.6% (-4.9 to 1.9)     | 0.5% (0 to 1.1)         | 0.7% (0.2 to 1.2)       | 1.3% (-0.5 to 3.7)     |
|                          | North Africa and Middle East | -1.1% (-5.4 to 2.9)     | -1.7% (-7.5 to 5.3)     | 1.1% (0.4 to 1.7)       | 1.2% (0.6 to 1.8)       | 0.3% (-5.2 to 6)       |
|                          | Afghanistan                  | -1.7% (-13.2 to 10.4)   | -0.7% (-12.7 to 10)     | 0% (-0.4 to 0.5)        | 0% (-0.7 to 0.8)        | 0.7% (-17.6 to 25.1)   |
|                          | Algeria                      | -1.2% (-13 to 11.7)     | -1.4% (-14.5 to 13.5)   | 0% (-0.4 to 0.5)        | 0.1% (-0.6 to 0.9)      | -0.1% (-16.3 to 21.9)  |
|                          | Bahrain                      | -2.8% (-17 to 11.9)     | -7.4% (-19.9 to 4.7)    | 0.2% (-0.5 to 0.8)      | 0.3% (-0.7 to 1.4)      | 0.3% (-19.4 to 23.8)   |
|                          | Egypt                        | -1.7% (-16 to 12.5)     | 0.5% (-14.1 to 16.8)    | -0.1% (-0.5 to 0.4)     | -0.1% (-0.8 to 0.7)     | -2.5% (-22.5 to 16.8)  |
|                          | Iran                         | -0.6% (-4.4 to 2.9)     | -1.2% (-5.1 to 6.8)     | 3.1% (0.8 to 5.7)       | 3.4% (1.6 to 5.2)       | 1.1% (-3.4 to 6.2)     |
|                          | Iraq                         | 0.2% (-11.6 to 14.2)    | 0.9% (-8.2 to 16.1)     | 0.1% (-0.4 to 0.5)      | 0.2% (-0.6 to 1)        | 1.6% (-15.8 to 24.4)   |
|                          | Jordan                       | 0.2% (-10.9 to 12.8)    | -1% (-12.5 to 12.4)     | 0% (-0.5 to 0.4)        | -0.1% (-0.9 to 0.6)     | 0.7% (-14.4 to 18.7)   |
|                          | Kuwait                       | 0.3% (-14.4 to 14.5)    | -0.6% (-11.6 to 11.9)   | 0.1% (-0.4 to 0.7)      | 0.9% (0.1 to 1.8)       | 1.6% (-16.9 to 24.5)   |
|                          | Lebanon                      | 0% (-10.3 to 12.8)      | -2.5% (-10 to 5.6)      | 0% (-0.4 to 0.5)        | 0.1% (-0.7 to 0.9)      | 0.8% (-14.7 to 21.3)   |
|                          | Libya                        | -1.7% (-13.7 to 10.6)   | -1.7% (-15.5 to 14.9)   | 0% (-0.4 to 0.5)        | 0% (-0.7 to 0.8)        | -1.1% (-16.3 to 17.7)  |
|                          | Morocco                      | 1.3% (-10 to 15.9)      | 5.1% (-9.2 to 23.7)     | 0% (-0.4 to 0.5)        | 0% (-0.7 to 0.8)        | 1% (-14.8 to 23.1)     |
|                          | Oman                         | -2.5% (-13.7 to 10.2)   | -1.6% (-9.5 to 9.2)     | -0.1% (-0.6 to 0.4)     | -0.7% (-1.5 to 0.2)     | -1% (-17.7 to 21.4)    |
|                          | Palestine                    | 1.8% (-8.8 to 15.9)     | 3.9% (-7.1 to 18.5)     | 0% (-0.5 to 0.4)        | 0.1% (-0.7 to 0.8)      | 1% (-14.1 to 24.9)     |
|                          | Qatar                        | -2.3% (-15.8 to 11.7)   | -0.6% (-16.6 to 15.7)   | -0.3% (-0.9 to 0.2)     | -0.1% (-1.1 to 0.8)     | 0% (-20.7 to 24.8)     |
|                          | Saudi Arabia                 | -2.7% (-17.8 to 14.4)   | -3.6% (-14.8 to 8.1)    | 0% (-0.7 to 0.6)        | 0% (-1.1 to 1.2)        | -0.8% (-23.8 to 28.8)  |
|                          | Sudan                        | -0.6% (-12 to 11.6)     | 0.9% (-9.4 to 15)       | 0% (-0.5 to 0.4)        | 0.1% (-0.6 to 0.9)      | 0.7% (-16.3 to 21)     |

**Table S33** Temporal changes in the age-standardised rate of DALYs, mortality, incidence, prevalence, and YLDs of neurological conditions in North Africa and Middle East and the world from 2010 to 2019

| Condition                               | Location                     | DALYs                        | Deaths                  | Incidence             | Prevalence            | YLDs                  |                      |
|-----------------------------------------|------------------------------|------------------------------|-------------------------|-----------------------|-----------------------|-----------------------|----------------------|
|                                         | Syrian Arab Republic         | 1·3% (-10·4 to 14·8)         | -1·2% (-17·6 to 16·9)   | 0·2% (-0·2 to 0·7)    | 0·9% (0·1 to 1·7)     | 2·1% (-14·1 to 19·9)  |                      |
|                                         | Tunisia                      | -0·7% (-11·8 to 12·4)        | -2% (-17·9 to 18·9)     | 0% (-0·4 to 0·5)      | 0·1% (-0·6 to 0·9)    | 0·8% (-13·2 to 20·1)  |                      |
|                                         | Turkey                       | -2·5% (-17·1 to 13·9)        | -6·4% (-20·8 to 11·7)   | 5·2% (1·8 to 9·6)     | 5·8% (1·9 to 10)      | 2·3% (-19·4 to 30·2)  |                      |
|                                         | United Arab Emirates         | -4·5% (-19·3 to 11·2)        | -12% (-23·2 to -1)      | 0·5% (-0·2 to 1·2)    | 0·6% (-0·4 to 1·7)    | -0·5% (-24·7 to 29·1) |                      |
|                                         | Yemen                        | -0·4% (-11·5 to 13·2)        | 2·3% (-8·7 to 14·6)     | 0% (-0·4 to 0·5)      | 0·1% (-0·6 to 0·8)    | -1% (-17·2 to 19·4)   |                      |
| Alzheimer's disease and other dementias | Global                       | -0·3% (-3·1 to 2·7)          | -1·2% (-4·5 to 2·2)     | 1·7% (0 to 3·3)       | 2·6% (0·8 to 4·2)     | 2·3% (0·5 to 4·1)     |                      |
|                                         | North Africa and Middle East | -1·4% (-5·7 to 3·5)          | -2% (-7·7 to 5·2)       | 1·5% (-0·6 to 3·4)    | 1·8% (-0·6 to 4)      | 1·6% (-0·8 to 4·1)    |                      |
|                                         | Afghanistan                  | 0·7% (-8·3 to 9·8)           | 0·4% (-11·6 to 11·7)    | 2·4% (-0·9 to 5·6)    | 2·4% (-1·4 to 6·2)    | 1·7% (-3 to 6·5)      |                      |
|                                         | Algeria                      | -0·6% (-10·9 to 10·8)        | -1% (-14 to 13·9)       | 1·5% (-1·9 to 4·8)    | 1·7% (-2 to 6·2)      | 1·3% (-3 to 6·2)      |                      |
|                                         | Bahrain                      | -3·6% (-12·7 to 6·4)         | -4·2% (-15·9 to 9)      | 0·5% (-2·7 to 3·6)    | 0·9% (-2·8 to 4·6)    | 1% (-3·3 to 5·6)      |                      |
|                                         | Egypt                        | 0% (-10·5 to 11·7)           | -0·4% (-14·4 to 15·8)   | 1·5% (-1·3 to 4·5)    | 1·5% (-1·7 to 4·9)    | 1·2% (-3 to 5·6)      |                      |
|                                         | Iran                         | -0·4% (-3·5 to 4·7)          | -1·4% (-5·2 to 6·4)     | 2·1% (-0·1 to 4·2)    | 2·3% (0 to 4·4)       | 2·1% (-0·2 to 4·4)    |                      |
|                                         | Iraq                         | 0·9% (-6·7 to 11·1)          | 0·1% (-9·5 to 15·2)     | 2·4% (-0·9 to 5·7)    | 3% (-0·7 to 7·1)      | 3·2% (-1·2 to 7·8)    |                      |
|                                         | Jordan                       | 0·8% (-8·5 to 10·7)          | 0·4% (-11·3 to 14·5)    | 1·6% (-1·9 to 5·2)    | 2% (-2·4 to 6·3)      | 1·9% (-3 to 7)        |                      |
|                                         | Kuwait                       | 0·7% (-7·4 to 10·1)          | 0·1% (-10·6 to 12·8)    | 1·7% (-1·8 to 5·6)    | 1·9% (-2·3 to 6)      | 1·9% (-3·3 to 6·8)    |                      |
|                                         | Lebanon                      | -1·7% (-7·7 to 4·9)          | -2·7% (-10·7 to 6·1)    | 1·3% (-1·9 to 4·9)    | 1·7% (-1·8 to 5·7)    | 1·3% (-2·7 to 6)      |                      |
|                                         | Libya                        | -1% (-12·2 to 11·5)          | -1·6% (-14·8 to 13·9)   | 1·1% (-2·4 to 4·8)    | 0·6% (-3·3 to 4·3)    | 0·2% (-4·4 to 5)      |                      |
|                                         | Morocco                      | 2% (-7·9 to 14·1)            | 2·4% (-13 to 20·2)      | 1·9% (-1·5 to 5·9)    | 2·6% (-1·4 to 7·1)    | 2·1% (-2·3 to 7·1)    |                      |
|                                         | Oman                         | -2·2% (-8·2 to 4·8)          | -2·4% (-10·5 to 8·4)    | 0·9% (-2·3 to 4·3)    | 1·2% (-2·4 to 5·1)    | 1·1% (-3·5 to 5·8)    |                      |
|                                         | Palestine                    | 1·3% (-6·8 to 11·3)          | 1·7% (-10 to 15·4)      | 1·5% (-2·1 to 4·7)    | 2% (-1·9 to 6)        | 1·7% (-3·2 to 6·4)    |                      |
|                                         | Qatar                        | -0·8% (-13·1 to 12·4)        | -0·4% (-16·9 to 15·9)   | 1·1% (-1·9 to 5)      | 1·3% (-2·5 to 5·6)    | 1·6% (-3·1 to 6·7)    |                      |
|                                         | Saudi Arabia                 | -1·1% (-9·5 to 7·9)          | -1·3% (-12·1 to 11)     | 0·6% (-2·8 to 3·9)    | 1·1% (-2·9 to 4·9)    | 1·2% (-3·4 to 6)      |                      |
|                                         | Sudan                        | 0·8% (-6·7 to 11)            | 0·6% (-9·3 to 14·6)     | 1·8% (-1·7 to 5·1)    | 2·3% (-1·7 to 6·2)    | 2·1% (-2·7 to 6·7)    |                      |
|                                         | Syrian Arab Republic         | -0·5% (-12·8 to 13·2)        | -0·7% (-15·8 to 17·2)   | 1·2% (-2·2 to 4·5)    | 1% (-3 to 4·7)        | -0·8% (-5·5 to 3·7)   |                      |
|                                         | Tunisia                      | -0·6% (-12·8 to 14·6)        | -1·1% (-16·4 to 19·5)   | 1·3% (-1·8 to 4·5)    | 1·8% (-1·7 to 5·7)    | 1·6% (-2·8 to 6·1)    |                      |
|                                         | Turkey                       | -5·7% (-17·3 to 7·5)         | -6·5% (-20·7 to 11·3)   | 0·8% (-2·5 to 3·9)    | 1% (-2·7 to 4·9)      | 1·3% (-3·4 to 6)      |                      |
|                                         | United Arab Emirates         | -3·7% (-12·4 to 5·9)         | -5% (-15·6 to 7·9)      | 1·3% (-2·3 to 4·9)    | 1·5% (-2·5 to 5·6)    | 1·7% (-3·1 to 6·7)    |                      |
|                                         | Yemen                        | 1·8% (-6·1 to 10·5)          | 2·1% (-9 to 14)         | 1·7% (-1·8 to 5·2)    | 1·2% (-2·9 to 4·9)    | 0·8% (-4 to 5·3)      |                      |
|                                         | Parkinson's disease          | Global                       | -2·1% (-6·1 to 1·7)     | -1·5% (-5·8 to 2·6)   | 6·6% (3 to 10)        | 0·1% (-2·9 to 3·1)    | 0·1% (-2·8 to 3·3)   |
|                                         |                              | North Africa and Middle East | 0·6% (-5·2 to 7·6)      | 0·5% (-5·7 to 7·9)    | 4·4% (1·1 to 8·3)     | 4·7% (0·1 to 10·8)    | 4·4% (-1·2 to 11·3)  |
|                                         |                              | Afghanistan                  | -0·8% (-14 to 13·5)     | 0·9% (-12·1 to 16)    | 0·2% (-6·4 to 7)      | 1·1% (-11·2 to 12·6)  | 0·6% (-15·7 to 18·2) |
|                                         |                              | Algeria                      | -2·5% (-16·6 to 13)     | -1·5% (-16·4 to 16·1) | 3·8% (-4·2 to 15·1)   | 4·5% (-7·5 to 22·5)   | 3·8% (-11·1 to 24)   |
| Bahrain                                 |                              | -16·1% (-27·5 to -3·1)       | -17·9% (-30·2 to -4·2)  | 1·2% (-7·1 to 13·6)   | -0·2% (-13·2 to 17·9) | -0·4% (-15·7 to 19·3) |                      |
| Egypt                                   |                              | 2% (-15·4 to 21)             | 2·6% (-15·2 to 22·3)    | 3·7% (-5·2 to 13·5)   | 3·7% (-9·7 to 19·3)   | 3·1% (-13·1 to 23·8)  |                      |
| Iran                                    |                              | 1·3% (-4·6 to 9·5)           | 1·7% (-5·4 to 12·1)     | 0·8% (-4·8 to 6·4)    | 2·1% (-2·8 to 7·6)    | 2·1% (-3·4 to 8·2)    |                      |
| Iraq                                    |                              | 6·9% (-6·8 to 22·7)          | 9·8% (-4·6 to 27·6)     | 0·8% (-7·1 to 9·1)    | 2·8% (-7·7 to 14·5)   | 2·8% (-11·7 to 20·3)  |                      |
| Jordan                                  |                              | -3·8% (-16 to 9·7)           | -6·9% (-20·2 to 7·2)    | 2·3% (-7·5 to 13·1)   | 8·4% (-6·7 to 26·5)   | 8% (-10·2 to 29·9)    |                      |
| Kuwait                                  |                              | -3·4% (-16·3 to 11·2)        | -2·5% (-17·3 to 14·5)   | -1·8% (-12·2 to 10·3) | -0·2% (-13·7 to 14·6) | -0·5% (-18·5 to 17·5) |                      |
| Lebanon                                 |                              | -2·1% (-11·6 to 8·3)         | -3·9% (-13·5 to 7·2)    | 3·2% (-7·7 to 14·9)   | 2·7% (-10·8 to 18)    | 2% (-14·3 to 20·5)    |                      |
| Libya                                   |                              | 0·5% (-15·6 to 20·9)         | -1·3% (-18 to 19·1)     | 0·2% (-8 to 10·5)     | -0·9% (-13·2 to 13·8) | -1·3% (-15·6 to 16·4) |                      |
| Morocco                                 |                              | 15·9% (-0·5 to 35·2)         | 21·8% (3·4 to 43·9)     | 5·2% (-4·1 to 14·4)   | 7·9% (-4·7 to 22·5)   | 7·5% (-9 to 27·5)     |                      |
| Oman                                    |                              | -3·7% (-13·2 to 7)           | 3·4% (-7·7 to 15·7)     | 4·5% (-4·9 to 17·1)   | 3% (-10·7 to 21·8)    | 2·9% (-13·5 to 24·3)  |                      |
| Palestine                               |                              | 9·1% (-4·1 to 23·6)          | 12·6% (-1·7 to 29·1)    | 3·4% (-7·1 to 14·1)   | 2·9% (-12·5 to 17·7)  | 2·5% (-15·1 to 22·2)  |                      |
| Qatar                                   |                              | -7·6% (-22·5 to 10·7)        | 1·5% (-16·3 to 24·1)    | -2·3% (-11·4 to 6·8)  | -4% (-17·5 to 10)     | -3·7% (-17·8 to 13·4) |                      |
| Saudi Arabia                            |                              | -7·2% (-17·9 to 3·5)         | -8·3% (-19·2 to 3·3)    | 8·1% (-1·4 to 18·9)   | 8·6% (-4·6 to 24·3)   | 8·3% (-8·5 to 27·5)   |                      |
| Sudan                                   |                              | 3·7% (-8·9 to 20·1)          | 6·1% (-7 to 23·4)       | 1·2% (-8·7 to 12·1)   | 2·3% (-11·1 to 19·3)  | 2·2% (-14·7 to 24·4)  |                      |
| Syrian Arab Republic                    |                              | -3·1% (-20·5 to 17·5)        | -4·8% (-22·5 to 15·4)   | 0·4% (-8·6 to 10·5)   | -0·6% (-14·8 to 15·9) | -1·8% (-17·9 to 18·4) |                      |
| Tunisia                                 |                              | -3·5% (-19 to 17)            | -4·9% (-21·5 to 17·6)   | 2·7% (-9·2 to 14·5)   | 4% (-12 to 19·7)      | 3·6% (-14·8 to 23·9)  |                      |
| Turkey                                  |                              | -3·7% (-19·3 to 14·5)        | -6% (-23·4 to 13·4)     | 8·9% (0 to 18·5)      | 7·1% (-4·9 to 19·3)   | 7·3% (-8·2 to 25)     |                      |
| United Arab Emirates                    |                              | -27·2% (-36·2 to -12·9)      | -30·5% (-39·2 to -17·5) | -3% (-11 to 5·7)      | -1·1% (-14·6 to 14·4) | -1% (-16·3 to 17·4)   |                      |

**Table S33** Temporal changes in the age-standardised rate of DALYs, mortality, incidence, prevalence, and YLDs of neurological conditions in North Africa and Middle East and the world from 2010 to 2019

| Condition            | Location                     | DALYs                   | Deaths                 | Incidence               | Prevalence              | YLDs                    |
|----------------------|------------------------------|-------------------------|------------------------|-------------------------|-------------------------|-------------------------|
| Idiopathic epilepsy  | Yemen                        | 3.7% (-9 to 18.3)       | 4.8% (-9 to 21)        | 0.5% (-7.7 to 10.7)     | -0.5% (-12.9 to 15)     | -1.1% (-17.3 to 19.5)   |
|                      | Global                       | -4.7% (-11.5 to 3.6)    | -8.7% (-15.1 to 1.3)   | 3.8% (-5.3 to 13.5)     | 2.8% (-5.4 to 11.9)     | 1.4% (-8.7 to 12.3)     |
|                      | North Africa and Middle East | -9.5% (-27.2 to 12.2)   | -13.8% (-22.2 to -3.4) | 0.9% (-23.2 to 31.8)    | 0.6% (-24.6 to 34.5)    | -3.7% (-32.6 to 36.7)   |
|                      | Afghanistan                  | -12.5% (-48.4 to 55.4)  | -16.6% (-29.9 to 1.8)  | 5% (-82.1 to 482.1)     | 5.1% (-81.9 to 491.7)   | 0.7% (-83.1 to 493.6)   |
|                      | Algeria                      | -9.6% (-58.3 to 92.8)   | -13.1% (-28.3 to 6.4)  | 1.7% (-72.7 to 282.8)   | 1% (-72.8 to 284.3)     | -5.3% (-76.7 to 312)    |
|                      | Bahrain                      | -6.9% (-58.5 to 98.7)   | -14.1% (-30 to 3.2)    | -3.2% (-70 to 224.7)    | -3.2% (-69.2 to 229.1)  | -5.3% (-77.7 to 282.6)  |
|                      | Egypt                        | -18.4% (-71.6 to 135.9) | -7.9% (-29.9 to 17.7)  | -13.6% (-78.5 to 275.8) | -16.9% (-79.3 to 258.8) | -20.4% (-81.7 to 241.9) |
|                      | Iran                         | -13.7% (-28.8 to 5.9)   | -25% (-31.5 to -12.9)  | 3.6% (-18.8 to 31.5)    | 2.5% (-19.6 to 30.6)    | -2% (-26.3 to 29.3)     |
|                      | Iraq                         | -7.5% (-63.7 to 109.2)  | -24% (-37.3 to -6.1)   | 8.9% (-74.2 to 363.1)   | 11% (-73.3 to 356.2)    | 5.7% (-81.3 to 430.5)   |
|                      | Jordan                       | 2.7% (-58.3 to 154.5)   | -7% (-21.7 to 10.8)    | 5.7% (-71.8 to 290.3)   | 7.3% (-70.5 to 298.7)   | 6.1% (-74.9 to 335.4)   |
|                      | Kuwait                       | -9.9% (-63.8 to 109.5)  | -15.5% (-29.6 to 2.3)  | -3.1% (-72.5 to 237.7)  | -5.1% (-72.7 to 232.3)  | -7.2% (-77.3 to 281.2)  |
|                      | Lebanon                      | 0.5% (-55.2 to 130.8)   | -5.1% (-20.8 to 12.3)  | 3.6% (-70 to 253.4)     | 4.1% (-69.6 to 254.8)   | 3.6% (-73.7 to 337)     |
|                      | Libya                        | -12.8% (-56.8 to 83.8)  | -9.2% (-26.6 to 12.3)  | -8.1% (-70.7 to 218.4)  | -11.5% (-72.4 to 206.2) | -11.6% (-76.6 to 276.9) |
|                      | Morocco                      | -4.9% (-63.7 to 142.1)  | -13.4% (-30.5 to 5.6)  | 7.2% (-76.2 to 320.6)   | 9.3% (-76.1 to 321)     | 3.5% (-78.9 to 334.8)   |
|                      | Oman                         | -3.4% (-69.6 to 186.9)  | -26% (-36.8 to -11.3)  | 4% (-68.8 to 293.7)     | 4.6% (-68.2 to 292)     | 2% (-76.8 to 339)       |
|                      | Palestine                    | 2.2% (-47.6 to 113.4)   | 4.6% (-14.9 to 23.5)   | 5.6% (-72.8 to 338.2)   | 5.9% (-73.1 to 343.9)   | 2% (-74.8 to 369.7)     |
|                      | Qatar                        | -9.5% (-69.3 to 140.5)  | -22.2% (-36.8 to -2.1) | -1% (-71.5 to 239)      | -2.4% (-72.3 to 235.5)  | -5.4% (-78.9 to 300.9)  |
|                      | Saudi Arabia                 | -11.2% (-58.8 to 87.6)  | -17.4% (-34.6 to 3.5)  | 1.4% (-69 to 234.7)     | 0.1% (-69.3 to 231.1)   | -6.8% (-77.8 to 264.4)  |
|                      | Sudan                        | -12.1% (-52 to 66.8)    | -16.6% (-34.4 to 8.8)  | 5.8% (-75.3 to 350.1)   | 6% (-75 to 346.9)       | -0.1% (-78.2 to 337.5)  |
|                      | Syrian Arab Republic         | 3.8% (-60.2 to 168.3)   | -0.4% (-23.2 to 31.5)  | 5% (-70.9 to 369.3)     | 6.7% (-70.6 to 376.3)   | 5.7% (-75.9 to 392.9)   |
| Tunisia              | -6.9% (-55.8 to 108.9)       | -15.2% (-33.8 to 8.4)   | 5.2% (-72.8 to 282.1)  | 6.4% (-72.3 to 292.9)   | 1.7% (-74.9 to 339.9)   |                         |
| Turkey               | -9.3% (-54.3 to 76.2)        | -17.6% (-32.3 to -0.2)  | 7% (-68.3 to 257.6)    | 7.7% (-68.1 to 255)     | 3.3% (-74.1 to 288.6)   |                         |
| United Arab Emirates | -10% (-59.1 to 98.3)         | -10.7% (-29.4 to 15.2)  | -6.6% (-71.8 to 211.4) | -8.6% (-72.1 to 206.7)  | -11.3% (-76.1 to 224.7) |                         |
| Yemen                | -10.4% (-54.8 to 81.9)       | -4.6% (-22.4 to 18.1)   | -5.8% (-78.7 to 380.5) | -9.4% (-79.6 to 359.3)  | -12% (-80.3 to 378.6)   |                         |
| Multiple sclerosis   | Global                       | -4.4% (-8.1 to -0.4)    | -4.9% (-9.9 to -0.1)   | 0.1% (-1.7 to 1.7)      | -2.7% (-4.5 to -0.9)    | -2.7% (-5.2 to -0.5)    |
|                      | North Africa and Middle East | 1.8% (-11.4 to 17.9)    | 1.3% (-12.7 to 19.1)   | 4.2% (2.3 to 5.9)       | 5% (3.1 to 6.8)         | 4.7% (0.1 to 9.4)       |
|                      | Afghanistan                  | 1.1% (-17.7 to 24.6)    | -1.5% (-22 to 29.9)    | 7% (2.5 to 12.4)        | 7.9% (2.1 to 14)        | 7.2% (-11.2 to 27.3)    |
|                      | Algeria                      | 2.8% (-13.1 to 19.8)    | -0.6% (-21.7 to 22.9)  | 5.6% (0.3 to 11.3)      | 6.8% (1.2 to 13.4)      | 6.5% (-10.8 to 26.6)    |
|                      | Bahrain                      | 5% (-8.7 to 21.5)       | -2.9% (-23.3 to 17.6)  | 11.6% (5.1 to 17.7)     | 7.8% (1.5 to 13.4)      | 7.6% (-9.9 to 27.5)     |
|                      | Egypt                        | -1.4% (-54.1 to 97)     | -1.5% (-55.7 to 87.9)  | 8.8% (4.1 to 13.5)      | 10.3% (4.9 to 15.9)     | 9.9% (-4.4 to 28.7)     |
|                      | Iran                         | 2.6% (-4 to 8.6)        | 2.7% (-7.9 to 13.6)    | 4.4% (2.1 to 6.7)       | 5.7% (3.4 to 8.1)       | 5.4% (-0.3 to 10.7)     |
|                      | Iraq                         | 4.9% (-9.1 to 20.8)     | -1.5% (-21.5 to 24.1)  | 9.7% (5.6 to 14.6)      | 11.1% (6.6 to 16.4)     | 10.4% (-6.7 to 29)      |
|                      | Jordan                       | -0.5% (-12.9 to 13.5)   | -6.6% (-23 to 16.3)    | 3.1% (-1.9 to 8.4)      | 4.1% (-1.4 to 10.2)     | 3.9% (-11.9 to 22.6)    |
|                      | Kuwait                       | 5.6% (-7 to 20.5)       | 0.6% (-16.7 to 21.9)   | 7.1% (2.5 to 12)        | 8.1% (3.1 to 13.7)      | 7.1% (-8.3 to 25.8)     |
|                      | Lebanon                      | 6.4% (-8.3 to 22.9)     | 5.7% (-15.2 to 31.1)   | 4.2% (-1.6 to 10.3)     | 6% (-0.5 to 13.1)       | 5.8% (-10.1 to 25.7)    |
|                      | Libya                        | 2% (-12.9 to 20.4)      | 3% (-18 to 28.6)       | 2.5% (-2.3 to 7.3)      | 2.5% (-2.8 to 8)        | 2.2% (-13.9 to 22)      |
|                      | Morocco                      | 3.1% (-14.1 to 22)      | 3.8% (-17.5 to 34.5)   | 7.7% (2.5 to 13)        | 9.1% (3.2 to 15.3)      | 8.6% (-8.8 to 29.2)     |
|                      | Oman                         | -12.8% (-25.8 to 5.6)   | -21.2% (-35.3 to -0.8) | 0.7% (-4.2 to 5.9)      | 2.8% (-2.3 to 8.6)      | 2% (-13 to 19.7)        |
|                      | Palestine                    | 6.6% (-8.2 to 24.2)     | 6.9% (-15.5 to 37.1)   | 6.5% (2.2 to 11.8)      | 7.1% (2.4 to 12.6)      | 6% (-10 to 23.4)        |
|                      | Qatar                        | 0.4% (-11.8 to 14)      | -9.1% (-29.2 to 15.6)  | 0.8% (-3 to 4.6)        | 3.1% (-0.4 to 7.1)      | 2.8% (-11.2 to 19.1)    |
|                      | Saudi Arabia                 | 4.6% (-9.6 to 20.5)     | -0.7% (-22.6 to 24)    | 8.5% (3.7 to 12.9)      | 9.9% (4.4 to 14.7)      | 7.3% (-9.3 to 25.8)     |
|                      | Sudan                        | 4.9% (-14.1 to 28.5)    | 4.8% (-18.7 to 37)     | 5.8% (0.4 to 10.2)      | 8.2% (2.8 to 12.8)      | 6.9% (-8.8 to 24.9)     |
|                      | Syrian Arab Republic         | 8% (-8 to 25.2)         | 4.9% (-22.3 to 40.6)   | 11.5% (6.4 to 17)       | 10% (4.7 to 15.5)       | 9% (-8 to 29.5)         |
|                      | Tunisia                      | 4.2% (-11 to 22.6)      | -0.2% (-24.2 to 30.4)  | 6.6% (0.9 to 12.3)      | 7.6% (1.7 to 13.9)      | 7.6% (-8.8 to 27.4)     |
| Turkey               | -2.1% (-28.4 to 24.4)        | -3.3% (-33.9 to 34.2)   | -0.6% (-3.1 to 1.9)    | -0.9% (-3.3 to 1.6)     | -0.4% (-15.5 to 15.4)   |                         |
| United Arab Emirates | 1.5% (-14.8 to 23.6)         | -6.7% (-26.6 to 22.1)   | 4.2% (-1.3 to 10.8)    | 2.1% (-3.2 to 8.1)      | 1.8% (-14.8 to 19.9)    |                         |

**Table S33** Temporal changes in the age-standardised rate of DALYs, mortality, incidence, prevalence, and YLDs of neurological conditions in North Africa and Middle East and the world from 2010 to 2019

| Condition             | Location                     | DALYs                | Deaths               | Incidence            | Prevalence           | YLDs                |
|-----------------------|------------------------------|----------------------|----------------------|----------------------|----------------------|---------------------|
| Headache disorders‡   | Yemen                        | 6·1% (-11·2 to 24·8) | 6·8% (-14·2 to 33·4) | 4·6% (-0·7 to 9·6)   | 5·4% (-0·5 to 11)    | 5% (-11·5 to 24·8)  |
|                       | Global                       | 0·6% (-1·2 to 1·5)   | 0% (0 to 0)          | 0·5% (-0·1 to 1·1)   | 0·6% (0·1 to 1·1)    | 0·6% (-1·2 to 1·5)  |
|                       | North Africa and Middle East | 0·2% (-1·4 to 1·7)   | 0% (0 to 0)          | 1% (0·4 to 1·7)      | 1·2% (0·6 to 1·8)    | 0·2% (-1·4 to 1·7)  |
|                       | Afghanistan                  | 0% (-3·1 to 2·9)     | 0% (0 to 0)          | 0% (-0·1 to 0)       | 0% (-0·5 to 0·4)     | 0% (-3·1 to 2·9)    |
|                       | Algeria                      | -0·1% (-2·9 to 2·8)  | 0% (0 to 0)          | 0% (0 to 0)          | 0·1% (-0·4 to 0·5)   | -0·1% (-2·9 to 2·8) |
|                       | Bahrain                      | 0·8% (-2·5 to 4)     | 0% (0 to 0)          | 0·2% (0 to 0·4)      | 0·4% (-0·2 to 0·9)   | 0·8% (-2·5 to 4)    |
|                       | Egypt                        | -0·4% (-3 to 2·5)    | 0% (0 to 0)          | 0% (-0·1 to 0)       | 0% (-0·5 to 0·4)     | -0·4% (-3 to 2·5)   |
|                       | Iran                         | 0·8% (-1·7 to 3·4)   | 0% (0 to 0)          | 3·1% (0·7 to 5·8)    | 3·4% (1·6 to 5·3)    | 0·8% (-1·7 to 3·4)  |
|                       | Iraq                         | 0% (-2·9 to 2·7)     | 0% (0 to 0)          | 0% (0 to 0)          | 0·1% (-0·4 to 0·6)   | 0% (-2·9 to 2·7)    |
|                       | Jordan                       | -1% (-3·7 to 1·9)    | 0% (0 to 0)          | -0·1% (-0·1 to 0)    | -0·2% (-0·7 to 0·3)  | -1% (-3·7 to 1·9)   |
|                       | Kuwait                       | 2·7% (-0·4 to 5·5)   | 0% (0 to 0)          | 0·1% (-0·1 to 0·3)   | 0·9% (0·5 to 1·4)    | 2·7% (-0·4 to 5·5)  |
|                       | Lebanon                      | -0·3% (-3·2 to 2·5)  | 0% (0 to 0)          | 0% (0 to 0·1)        | 0% (-0·5 to 0·5)     | -0·3% (-3·2 to 2·5) |
|                       | Libya                        | 0% (-3·2 to 2·9)     | 0% (0 to 0)          | 0·1% (0 to 0·1)      | 0·1% (-0·4 to 0·6)   | 0% (-3·2 to 2·9)    |
|                       | Morocco                      | -0·4% (-3 to 2·5)    | 0% (0 to 0)          | 0% (-0·1 to 0)       | -0·1% (-0·5 to 0·4)  | -0·4% (-3 to 2·5)   |
|                       | Oman                         | -2·6% (-5·4 to 0·4)  | 0% (0 to 0)          | -0·2% (-0·4 to 0)    | -0·7% (-1·3 to -0·2) | -2·6% (-5·4 to 0·4) |
|                       | Palestine                    | 0·1% (-2·7 to 2·9)   | 0% (0 to 0)          | -0·1% (-0·1 to 0)    | 0% (-0·5 to 0·5)     | 0·1% (-2·7 to 2·9)  |
|                       | Qatar                        | 0·3% (-2·9 to 3·8)   | 0% (0 to 0)          | -0·3% (-0·5 to -0·2) | -0·1% (-0·6 to 0·5)  | 0·3% (-2·9 to 3·8)  |
|                       | Saudi Arabia                 | -0·3% (-3·2 to 2·6)  | 0% (0 to 0)          | -0·1% (-0·1 to 0)    | 0% (-0·5 to 0·5)     | -0·3% (-3·2 to 2·6) |
|                       | Sudan                        | 0% (-2·9 to 3·1)     | 0% (0 to 0)          | -0·1% (-0·2 to 0)    | 0% (-0·4 to 0·5)     | 0% (-2·9 to 3·1)    |
|                       | Syrian Arab Republic         | 1·6% (-1·4 to 4·3)   | 0% (0 to 0)          | 0·2% (0 to 0·4)      | 0·8% (0·3 to 1·4)    | 1·6% (-1·4 to 4·3)  |
| Tunisia               | -0·1% (-2·5 to 2·9)          | 0% (0 to 0)          | 0% (0 to 0)          | 0·1% (-0·4 to 0·6)   | -0·1% (-2·5 to 2·9)  |                     |
| Turkey                | 1·5% (-6·6 to 10·2)          | 0% (0 to 0)          | 5·2% (1·9 to 9·7)    | 5·9% (2·1 to 10·2)   | 1·5% (-6·6 to 10·2)  |                     |
| United Arab Emirates  | 1·9% (-1·5 to 5·6)           | 0% (0 to 0)          | 0·5% (0·2 to 0·9)    | 0·7% (0·2 to 1·4)    | 1·9% (-1·5 to 5·6)   |                     |
| Yemen                 | 0% (-3 to 3)                 | 0% (0 to 0)          | 0% (0 to 0·1)        | 0·1% (-0·4 to 0·6)   | 0% (-3 to 3)         |                     |
| Migraine              | Global                       | 0·7% (-1·3 to 1·7)   | 0% (0 to 0)          | 0·8% (0 to 1·6)      | 1% (0 to 2·1)        | 0·7% (-1·3 to 1·7)  |
|                       | North Africa and Middle East | 0·1% (-1·4 to 1·7)   | 0% (0 to 0)          | 0·1% (-0·5 to 0·8)   | 0·3% (-0·9 to 1·2)   | 0·1% (-1·4 to 1·7)  |
|                       | Afghanistan                  | -0·1% (-3·2 to 3·2)  | 0% (0 to 0)          | 0% (-0·1 to 0·1)     | -0·4% (-0·5 to -0·2) | -0·1% (-3·2 to 3·2) |
|                       | Algeria                      | -0·1% (-3·1 to 3)    | 0% (0 to 0)          | 0% (0 to 0)          | 0% (0 to 0)          | -0·1% (-3·1 to 3)   |
|                       | Bahrain                      | 0·8% (-2·7 to 4·4)   | 0% (0 to 0)          | 1·8% (1·2 to 2·6)    | 0·9% (0·5 to 1·4)    | 0·8% (-2·7 to 4·4)  |
|                       | Egypt                        | -0·4% (-3·5 to 2·8)  | 0% (0 to 0)          | -0·3% (-0·3 to -0·2) | -0·3% (-0·4 to -0·3) | -0·4% (-3·5 to 2·8) |
|                       | Iran                         | 0·6% (-2·1 to 3·5)   | 0% (0 to 0)          | 0·5% (-2 to 3)       | 0·6% (-2·3 to 3·7)   | 0·6% (-2·1 to 3·5)  |
|                       | Iraq                         | 0% (-3·2 to 3·2)     | 0% (0 to 0)          | 0% (0 to 0)          | 0% (0 to 0)          | 0% (-3·2 to 3·2)    |
|                       | Jordan                       | -1·1% (-4·2 to 2·1)  | 0% (0 to 0)          | -0·8% (-0·9 to -0·6) | -1·1% (-1·2 to -0·9) | -1·1% (-4·2 to 2·1) |
|                       | Kuwait                       | 2·8% (-0·6 to 5·9)   | 0% (0 to 0)          | 2·1% (1·6 to 2·8)    | 2·8% (2·3 to 3·3)    | 2·8% (-0·6 to 5·9)  |
|                       | Lebanon                      | -0·4% (-3·4 to 2·8)  | 0% (0 to 0)          | -0·5% (-0·7 to -0·4) | -0·4% (-0·6 to -0·3) | -0·4% (-3·4 to 2·8) |
|                       | Libya                        | -0·1% (-3·6 to 3·3)  | 0% (0 to 0)          | 0·2% (0·1 to 0·3)    | 0·1% (0·1 to 0·2)    | -0·1% (-3·6 to 3·3) |
|                       | Morocco                      | -0·4% (-3·3 to 2·8)  | 0% (0 to 0)          | -0·4% (-0·5 to -0·3) | -0·4% (-0·5 to -0·3) | -0·4% (-3·3 to 2·8) |
|                       | Oman                         | -2·8% (-5·8 to 0·6)  | 0% (0 to 0)          | -2·4% (-3 to -1·9)   | -2·8% (-3·3 to -2·3) | -2·8% (-5·8 to 0·6) |
|                       | Palestine                    | 0·1% (-3 to 3·3)     | 0% (0 to 0)          | -0·1% (-0·1 to 0)    | -0·1% (-0·2 to -0·1) | 0·1% (-3 to 3·3)    |
|                       | Qatar                        | 0·3% (-3·2 to 4·2)   | 0% (0 to 0)          | -0·1% (-0·6 to 0·3)  | 0·4% (0·1 to 0·7)    | 0·3% (-3·2 to 4·2)  |
|                       | Saudi Arabia                 | -0·3% (-3·6 to 2·9)  | 0% (0 to 0)          | -0·3% (-0·4 to -0·2) | -0·2% (-0·3 to -0·1) | -0·3% (-3·6 to 2·9) |
|                       | Sudan                        | 0% (-3·2 to 3·3)     | 0% (0 to 0)          | -0·2% (-0·4 to 0)    | 0·1% (-0·1 to 0·2)   | 0% (-3·2 to 3·3)    |
|                       | Syrian Arab Republic         | 1·7% (-1·5 to 5)     | 0% (0 to 0)          | 2·6% (2 to 3·2)      | 2·7% (2·2 to 3·1)    | 1·7% (-1·5 to 5)    |
|                       | Tunisia                      | -0·1% (-2·8 to 3·2)  | 0% (0 to 0)          | -0·1% (-0·1 to 0)    | 0% (0 to 0)          | -0·1% (-2·8 to 3·2) |
| Turkey                | 1·4% (-6·3 to 10·5)          | 0% (0 to 0)          | 0·8% (-4·3 to 5·8)   | 1·7% (-4·6 to 7·8)   | 1·4% (-6·3 to 10·5)  |                     |
| United Arab Emirates  | 2·1% (-1·9 to 5·6)           | 0% (0 to 0)          | 3·3% (2·1 to 4·7)    | 2·2% (1·6 to 3)      | 2·1% (-1·9 to 5·6)   |                     |
| Yemen                 | -0·1% (-3·1 to 3·1)          | 0% (0 to 0)          | 0·1% (0·1 to 0·1)    | 0·1% (0·1 to 0·2)    | -0·1% (-3·1 to 3·1)  |                     |
| Tension-type headache | Global                       | -0·3% (-2·2 to 1·3)  | 0% (0 to 0)          | 0·5% (-0·2 to 1·1)   | 0·7% (-0·1 to 1·4)   | -0·3% (-2·2 to 1·3) |
|                       | North Africa and Middle East | 0·6% (-3·4 to 3·2)   | 0% (0 to 0)          | 1·2% (0·5 to 1·9)    | 2% (1·2 to 3)        | 0·6% (-3·4 to 3·2)  |
|                       | Afghanistan                  | 0·2% (-7·6 to 7·7)   | 0% (0 to 0)          | 0% (-0·1 to 0)       | 0% (-0·1 to 0·1)     | 0·2% (-7·6 to 7·7)  |



**Table S33** Temporal changes in the age-standardised rate of DALYs, mortality, incidence, prevalence, and YLDs of neurological conditions in North Africa and Middle East and the world from 2010 to 2019

| Condition                    | Location                     | DALYs                  | Deaths                | Incidence            | Prevalence           | YLDs                   |
|------------------------------|------------------------------|------------------------|-----------------------|----------------------|----------------------|------------------------|
|                              | Algeria                      | 0% (-7.2 to 7.4)       | 0% (0 to 0)           | 0% (0 to 0)          | 0% (0 to 0)          | 0% (-7.2 to 7.4)       |
|                              | Bahrain                      | 0.3% (-7.7 to 7.6)     | 0% (0 to 0)           | 0% (-0.2 to 0.2)     | 0.1% (-0.2 to 0.4)   | 0.3% (-7.7 to 7.6)     |
|                              | Egypt                        | 0% (-8 to 6.9)         | 0% (0 to 0)           | 0% (0 to 0)          | 0% (0 to 0)          | 0% (-8 to 6.9)         |
|                              | Iran                         | 2.3% (-1.8 to 6.5)     | 0% (0 to 0)           | 3.5% (0.8 to 6.5)    | 5.7% (2.6 to 8.8)    | 2.3% (-1.8 to 6.5)     |
|                              | Iraq                         | 0.1% (-7.3 to 7.4)     | 0% (0 to 0)           | 0% (0 to 0)          | 0% (0 to 0)          | 0.1% (-7.3 to 7.4)     |
|                              | Jordan                       | -0.5% (-7.7 to 5.9)    | 0% (0 to 0)           | 0% (0 to 0.1)        | 0% (-0.1 to 0.1)     | -0.5% (-7.7 to 5.9)    |
|                              | Kuwait                       | 1.7% (-5.2 to 10.6)    | 0% (0 to 0)           | -0.1% (-0.4 to 0.1)  | 0% (-0.2 to 0.3)     | 1.7% (-5.2 to 10.6)    |
|                              | Lebanon                      | 0.1% (-7.3 to 7.1)     | 0% (0 to 0)           | 0.1% (0 to 0.1)      | 0.1% (0 to 0.1)      | 0.1% (-7.3 to 7.1)     |
|                              | Libya                        | 0.1% (-6.7 to 7.9)     | 0% (0 to 0)           | 0% (0 to 0.1)        | 0.1% (0 to 0.1)      | 0.1% (-6.7 to 7.9)     |
|                              | Morocco                      | -0.1% (-7.1 to 7.4)    | 0% (0 to 0)           | 0% (0 to 0.1)        | 0% (0 to 0.1)        | -0.1% (-7.1 to 7.4)    |
|                              | Oman                         | -1.1% (-8.9 to 6.4)    | 0% (0 to 0)           | 0.1% (-0.1 to 0.4)   | 0% (-0.3 to 0.3)     | -1.1% (-8.9 to 6.4)    |
|                              | Palestine                    | 0.2% (-7.1 to 7.8)     | 0% (0 to 0)           | -0.1% (-0.1 to 0)    | -0.1% (-0.1 to -0.1) | 0.2% (-7.1 to 7.8)     |
|                              | Qatar                        | 0% (-7.9 to 8.9)       | 0% (0 to 0)           | -0.3% (-0.5 to -0.2) | -0.4% (-0.7 to -0.2) | 0% (-7.9 to 8.9)       |
|                              | Saudi Arabia                 | 0% (-6.8 to 7.6)       | 0% (0 to 0)           | 0% (-0.1 to 0)       | 0% (-0.1 to 0)       | 0% (-6.8 to 7.6)       |
|                              | Sudan                        | 0.2% (-7.7 to 8.3)     | 0% (0 to 0)           | -0.1% (-0.1 to 0)    | -0.1% (-0.2 to 0)    | 0.2% (-7.7 to 8.3)     |
|                              | Syrian Arab Republic         | 0.6% (-6.4 to 8.9)     | 0% (0 to 0)           | -0.1% (-0.4 to 0.1)  | 0% (-0.3 to 0.3)     | 0.6% (-6.4 to 8.9)     |
|                              | Tunisia                      | 0% (-6.9 to 7)         | 0% (0 to 0)           | 0% (0 to 0)          | 0% (0 to 0)          | 0% (-6.9 to 7)         |
|                              | Turkey                       | 3.3% (-15.1 to 17.9)   | 0% (0 to 0)           | 5.9% (2.2 to 10.9)   | 11.2% (5 to 19.4)    | 3.3% (-15.1 to 17.9)   |
|                              | United Arab Emirates         | 1% (-7.1 to 10)        | 0% (0 to 0)           | 0.2% (-0.2 to 0.6)   | 0.1% (-0.3 to 0.5)   | 1% (-7.1 to 10)        |
|                              | Yemen                        | 0.1% (-6.3 to 7.2)     | 0% (0 to 0)           | 0% (0 to 0)          | 0% (0 to 0.1)        | 0.1% (-6.3 to 7.2)     |
| Motor neuron disease         | Global                       | 0% (-4.4 to 4.3)       | 0.7% (-4.1 to 4.9)    | 4.7% (2.9 to 6.7)    | 3.3% (1.6 to 4.9)    | 3.2% (1.6 to 4.9)      |
|                              | North Africa and Middle East | -0.3% (-19 to 20.7)    | 7.2% (-13.9 to 31.9)  | 7.2% (5.1 to 9.2)    | 5.4% (3.8 to 7.1)    | 5.4% (3.8 to 7.1)      |
|                              | Afghanistan                  | 9.3% (-14 to 37.8)     | 10.3% (-18.2 to 49.3) | 10.2% (5.7 to 15.2)  | 8.3% (4.2 to 13.5)   | 8.3% (4.2 to 13.5)     |
|                              | Algeria                      | 5.7% (-16.8 to 32.3)   | 6.4% (-21.6 to 44.8)  | 9.5% (5.6 to 13.6)   | 6.5% (2 to 10.7)     | 6.5% (2 to 10.7)       |
|                              | Bahrain                      | -2.5% (-16.7 to 13.4)  | -7.2% (-26.8 to 15.2) | 10.9% (6.8 to 15)    | 6% (1.1 to 10.7)     | 6% (1.1 to 10.7)       |
|                              | Egypt                        | 20.3% (-18.8 to 71.5)  | 23.3% (-19.1 to 79.5) | 9.7% (5.4 to 14.2)   | 6.8% (2.3 to 10.6)   | 6.8% (2.3 to 10.6)     |
|                              | Iran                         | 21.1% (2.7 to 40.9)    | 31.3% (6.4 to 58.5)   | 12.5% (10.6 to 14.3) | 9.9% (7.5 to 12.3)   | 9.9% (7.5 to 12.3)     |
|                              | Iraq                         | 3.5% (-15.4 to 27.2)   | 7.2% (-22.1 to 45.2)  | 9.1% (5.1 to 12.9)   | 8% (3.9 to 12.2)     | 8% (3.9 to 12.2)       |
|                              | Jordan                       | 6.5% (-14.6 to 33.8)   | 3.3% (-20.7 to 30.5)  | 9.6% (5.6 to 14.2)   | 6.4% (2.2 to 11.7)   | 6.4% (2.2 to 11.7)     |
|                              | Kuwait                       | -19.3% (-39.7 to 2.4)  | -10% (-35 to 15.9)    | 2% (-2.3 to 6.4)     | -0.1% (-4.9 to 4.4)  | -0.1% (-4.9 to 4.4)    |
|                              | Lebanon                      | 14.1% (-11.8 to 41.6)  | 15.9% (-16.8 to 52.2) | 10.2% (5.8 to 15.2)  | 6.5% (2.2 to 11.3)   | 6.5% (2.2 to 11.3)     |
|                              | Libya                        | 10.7% (-21.9 to 52.8)  | 13.4% (-25.4 to 66.2) | 10.2% (5.7 to 14.6)  | 0.5% (-4.1 to 4.9)   | 0.5% (-4.1 to 4.9)     |
|                              | Morocco                      | 14.9% (-8.6 to 44.9)   | 22% (-9.4 to 67.8)    | 9.4% (4.8 to 13.7)   | 7.7% (3.7 to 12)     | 7.7% (3.7 to 12)       |
|                              | Oman                         | -17.9% (-35 to 4.3)    | -20.5% (-40 to 5.3)   | 10.9% (6.5 to 15.6)  | 5.8% (1.2 to 10.5)   | 5.8% (1.2 to 10.5)     |
|                              | Palestine                    | 5.9% (-13.7 to 28.7)   | 7.4% (-21.2 to 44.5)  | 8.9% (4.3 to 13)     | 6.3% (1.9 to 10.4)   | 6.3% (1.9 to 10.4)     |
|                              | Qatar                        | -2% (-21.8 to 22.7)    | -4.7% (-32.3 to 32.3) | 9.1% (5 to 13.1)     | 5.9% (1.2 to 10.4)   | 5.9% (1.2 to 10.4)     |
|                              | Saudi Arabia                 | 9.3% (-15 to 39.3)     | 9% (-20.6 to 45.6)    | 8.5% (4.9 to 12.6)   | 6.6% (2.5 to 11)     | 6.6% (2.5 to 11)       |
|                              | Sudan                        | 13.4% (-13.3 to 44.9)  | 17% (-17 to 60)       | 9.1% (4.8 to 13.8)   | 6.7% (2.4 to 10.7)   | 6.7% (2.4 to 10.7)     |
|                              | Syrian Arab Republic         | 13.3% (-16.2 to 53.5)  | 17.3% (-21.5 to 72.1) | 11.6% (7.6 to 15.4)  | 3.5% (-0.5 to 7.6)   | 3.5% (-0.5 to 7.6)     |
|                              | Tunisia                      | 7.5% (-16.9 to 41.2)   | 9.8% (-22.3 to 59.2)  | 9.6% (5.2 to 13.5)   | 6.5% (2.6 to 11)     | 6.5% (2.6 to 11)       |
|                              | Turkey                       | -11.4% (-36.7 to 21.2) | -1.2% (-26.8 to 31.5) | 0.5% (-3.6 to 5)     | 4.5% (0.5 to 8.7)    | 4.5% (0.5 to 8.7)      |
| United Arab Emirates         | -1.4% (-31.8 to 39.5)        | -6.4% (-42.3 to 38.1)  | 8.5% (4.3 to 13.1)    | 3.1% (-1.6 to 7.8)   | 3.1% (-1.6 to 7.8)   |                        |
| Yemen                        | 10.4% (-15.3 to 40.2)        | 12.6% (-21.7 to 52.9)  | 12.2% (7.8 to 17.1)   | 2.3% (-1.7 to 7.1)   | 2.3% (-1.7 to 7.1)   |                        |
| Other neurological disorders | Global                       | 7.1% (1 to 13.1)       | 2.4% (-2.7 to 7)      |                      | 3.7% (1.6 to 5.8)    | 16.5% (6.4 to 27.4)    |
|                              | North Africa and Middle East | 8.6% (-6.5 to 26.1)    | 16.6% (4.7 to 28.2)   |                      | 0.6% (-2.2 to 3.1)   | 10.5% (-17.6 to 45.9)  |
|                              | Afghanistan                  | 8.7% (-40 to 95.9)     | 5.9% (-13.2 to 32)    |                      | -0.4% (-0.7 to -0.1) | 15.3% (-66.5 to 294.2) |
|                              | Algeria                      | 8.4% (-39.2 to 91.2)   | 11% (-8.7 to 34.2)    |                      | 0% (0 to 0.1)        | 10.1% (-61.1 to 203)   |
|                              | Bahrain                      | 1.2% (-38.2 to 61.2)   | -10% (-24.6 to 6.3)   |                      | -0.2% (-0.6 to 0.2)  | 11.2% (-63.3 to 209.2) |
|                              | Egypt                        | 3.2% (-41 to 82.1)     | 18.9% (-8.9 to 52.1)  |                      | 0% (-0.1 to 0.1)     | -3.8% (-68 to 198.5)   |

**Table S33** Temporal changes in the age-standardised rate of DALYs, mortality, incidence, prevalence, and YLDs of neurological conditions in North Africa and Middle East and the world from 2010 to 2019

| Condition      | Location                     | DALYs                  | Deaths                | Incidence               | Prevalence             | YLDs                   |
|----------------|------------------------------|------------------------|-----------------------|-------------------------|------------------------|------------------------|
|                | Iran                         | 14·8% (0 to 32·7)      | 32% (22·1 to 42·3)    |                         | -0·3% (-6·2 to 5·3)    | 12·5% (-9·9 to 40·9)   |
|                | Iraq                         | 7·3% (-37·7 to 76·5)   | 1% (-16·8 to 23·6)    |                         | 0% (-0·1 to 0)         | 21·3% (-63·1 to 276·8) |
|                | Jordan                       | 14·6% (-31·9 to 92·8)  | 7·3% (-10·9 to 28·9)  |                         | -0·4% (-0·6 to -0·2)   | 21·3% (-56·3 to 229·7) |
|                | Kuwait                       | 6·2% (-43·5 to 91·6)   | 4·1% (-14·2 to 26·5)  |                         | 0·3% (-0·1 to 0·7)     | 9·3% (-60·9 to 196·7)  |
|                | Lebanon                      | 19% (-28·5 to 96·5)    | 19·5% (-0·6 to 41·5)  |                         | 0% (-0·2 to 0·1)       | 18·2% (-55·6 to 217·4) |
|                | Libya                        | 1·5% (-36 to 65·7)     | 5% (-14·6 to 29·6)    |                         | -0·1% (-0·2 to 0)      | 5% (-59·4 to 197·6)    |
|                | Morocco                      | 12·6% (-37·3 to 108·2) | 16·6% (-2·4 to 41·5)  |                         | 0% (-0·1 to 0·1)       | 19% (-60·8 to 254·9)   |
|                | Oman                         | 5·9% (-43·6 to 86·9)   | -7·2% (-19·2 to 6·4)  |                         | -0·3% (-0·6 to 0·2)    | 17·3% (-62·2 to 233·7) |
|                | Palestine                    | 14·7% (-34·2 to 101·9) | 18·8% (-2·5 to 45·2)  |                         | 0% (-0·1 to 0·2)       | 16·4% (-58·2 to 245·4) |
|                | Qatar                        | -6·9% (-45·1 to 47·1)  | -15·8% (-31·6 to 3·2) |                         | 0·4% (0·1 to 0·8)      | 10·6% (-62·6 to 220)   |
|                | Saudi Arabia                 | 4·5% (-44·2 to 94·9)   | 5·9% (-11·5 to 26·8)  |                         | 0·1% (0 to 0·3)        | 7·3% (-65·9 to 224·8)  |
|                | Sudan                        | 18·3% (-31·8 to 111·3) | 31·3% (0·2 to 70)     |                         | 0·1% (0 to 0·2)        | 14·3% (-60 to 250·2)   |
|                | Syrian Arab Republic         | 13·4% (-33 to 91)      | 6·7% (-16·9 to 35·4)  |                         | 0% (-0·4 to 0·4)       | 21·2% (-58·1 to 235·1) |
|                | Tunisia                      | 10% (-35·2 to 94·5)    | 7·6% (-17·7 to 40·5)  |                         | 0% (0 to 0·1)          | 16·7% (-55·9 to 219·8) |
|                | Turkey                       | 6·4% (-31·1 to 60·3)   | 12% (-9·3 to 37·8)    |                         | 5·4% (-8 to 21·3)      | 15·7% (-60·7 to 230·6) |
|                | United Arab Emirates         | 8·5% (-29·6 to 63·3)   | 9·7% (-20·9 to 42·6)  |                         | -0·4% (-1 to 0)        | 3·5% (-64·3 to 201·2)  |
|                | Yemen                        | 4·5% (-44·8 to 108·2)  | 9·3% (-11·6 to 34·3)  |                         | 0% (-0·1 to 0)         | 4·1% (-64·4 to 250·8)  |
| Head injuries§ | Global                       |                        |                       | -0·4% (-2·4 to 1·5)     | 1% (0·4 to 1·6)        | 0·7% (-0·1 to 1·4)     |
|                | North Africa and Middle East |                        |                       | 9·9% (6·2 to 15·9)      | 7% (5·2 to 9·3)        | 6·7% (4·6 to 9·2)      |
|                | Afghanistan                  |                        |                       | 44·7% (19·8 to 77·4)    | 4·4% (-10·2 to 22·2)   | 4·3% (-10·1 to 22·7)   |
|                | Algeria                      |                        |                       | -0·3% (-4·2 to 3·3)     | 0·4% (-1·3 to 2·1)     | 0·1% (-4·2 to 5)       |
|                | Bahrain                      |                        |                       | 3% (-1·4 to 7·4)        | 6·8% (4·3 to 9·5)      | 6·4% (0·2 to 12·6)     |
|                | Egypt                        |                        |                       | 9·7% (5·4 to 13·9)      | 8·7% (6·7 to 10·6)     | 8·4% (3·1 to 13·9)     |
|                | Iran                         |                        |                       | -4·7% (-6·7 to -2·7)    | -6·5% (-8·4 to -5·2)   | -6·6% (-8·8 to -4·9)   |
|                | Iraq                         |                        |                       | -23·5% (-39·6 to -10·7) | -1·6% (-4·4 to 0·9)    | -1·1% (-5·2 to 3·1)    |
|                | Jordan                       |                        |                       | 2·7% (-0·9 to 6·2)      | 3·7% (1·8 to 5·5)      | 3·5% (-1·9 to 9·5)     |
|                | Kuwait                       |                        |                       | -5·6% (-9·4 to -1·3)    | -7·3% (-9·4 to -5·2)   | -7·4% (-11·6 to -3)    |
|                | Lebanon                      |                        |                       | 14·8% (11·5 to 17·9)    | 3% (-6·3 to 11·1)      | 3·5% (-6·8 to 13·4)    |
|                | Libya                        |                        |                       | 20·8% (5·7 to 52·3)     | 5% (0·1 to 12·1)       | 4·1% (-2·4 to 12·1)    |
|                | Morocco                      |                        |                       | 2·1% (-1·6 to 5·7)      | 2·2% (0·2 to 4·1)      | 1·9% (-2·6 to 6·7)     |
|                | Oman                         |                        |                       | -4·8% (-9·5 to -0·2)    | -2·6% (-4·2 to -1)     | -2·8% (-6·7 to 1·5)    |
|                | Palestine                    |                        |                       | -18·7% (-40·5 to -1·3)  | -4·5% (-10·3 to 2·6)   | -4·1% (-10·9 to 3·8)   |
|                | Qatar                        |                        |                       | -8·3% (-12 to -4·6)     | -6·7% (-8·7 to -4·8)   | -7·1% (-11·1 to -2·9)  |
|                | Saudi Arabia                 |                        |                       | -0·4% (-4·3 to 3·6)     | 1·8% (-0·1 to 3·8)     | 1·7% (-2·2 to 5·6)     |
|                | Sudan                        |                        |                       | -6·6% (-20·3 to 1·7)    | 1·1% (-1·1 to 3·2)     | 1% (-4·8 to 7·3)       |
|                | Syrian Arab Republic         |                        |                       | 96·5% (43·7 to 199·7)   | 120·4% (54·7 to 227·4) | 109·6% (50·8 to 219·8) |
|                | Tunisia                      |                        |                       | 3·6% (-0·2 to 7·1)      | 3·6% (1·6 to 5·4)      | 3·4% (-1·7 to 8·3)     |
|                | Turkey                       |                        |                       | 14·5% (11·1 to 17·9)    | 13·7% (11·5 to 15·9)   | 13·7% (8·5 to 19·5)    |
|                | United Arab Emirates         |                        |                       | -4·4% (-8·4 to -0·1)    | 0·4% (-1·7 to 2·2)     | 0·2% (-5 to 5·5)       |
|                | Yemen                        |                        |                       | 93·4% (36·9 to 209·3)   | 20·1% (7·5 to 37·8)    | 17·6% (5·1 to 36)      |
| Minor TBI      | Global                       |                        |                       | -0·1% (-3·1 to 2·4)     | 3·1% (2·4 to 3·9)      | 3·1% (2·1 to 4)        |
|                | North Africa and Middle East |                        |                       | 12·6% (6·7 to 22·8)     | 9·8% (6·3 to 15)       | 9·7% (5·5 to 15·4)     |
|                | Afghanistan                  |                        |                       | 41·6% (13·3 to 77·1)    | 5·8% (-10·1 to 27·4)   | 5·3% (-9·8 to 29·7)    |
|                | Algeria                      |                        |                       | -0·6% (-6·2 to 4)       | 0·2% (-2·7 to 2·9)     | 0·2% (-9·3 to 10·3)    |
|                | Bahrain                      |                        |                       | 5·9% (1·2 to 10·1)      | 7·2% (4·1 to 10·6)     | 7·2% (-4·1 to 18·6)    |
|                | Egypt                        |                        |                       | 12·9% (8·1 to 19·3)     | 10·6% (7·9 to 13·4)    | 10·4% (-0·4 to 21·7)   |
|                | Iran                         |                        |                       | -4·3% (-7·7 to -1·3)    | -8·1% (-12·5 to -4·9)  | -8·1% (-13 to -3·9)    |



**Table S33** Temporal changes in the age-standardised rate of DALYs, mortality, incidence, prevalence, and YLDs of neurological conditions in North Africa and Middle East and the world from 2010 to 2019

| Condition               | Location                        | DALYs | Deaths | Incidence               | Prevalence             | YLDs                    |
|-------------------------|---------------------------------|-------|--------|-------------------------|------------------------|-------------------------|
|                         | Iraq                            |       |        | -32.1% (-51.3 to -13.2) | -5.4% (-9.9 to -1.4)   | -4.5% (-10.8 to 3.2)    |
|                         | Jordan                          |       |        | 4.3% (0.4 to 8)         | 5.2% (2.3 to 8.4)      | 5.5% (-5.4 to 18.5)     |
|                         | Kuwait                          |       |        | -3% (-6.8 to 1.3)       | -7% (-11.4 to -3.2)    | -7.1% (-15.4 to 2.6)    |
|                         | Lebanon                         |       |        | 15.6% (12 to 19.1)      | -4.1% (-13.9 to 7.2)   | -4.4% (-15.9 to 10.9)   |
|                         | Libya                           |       |        | 41.6% (11.3 to 115.3)   | 21% (6.8 to 45.2)      | 20.6% (3.6 to 47.8)     |
|                         | Morocco                         |       |        | 1.9% (-2 to 5.9)        | 2% (-0.7 to 4.5)       | 1.9% (-7.1 to 11.9)     |
|                         | Oman                            |       |        | -2.7% (-7.8 to 2)       | -4% (-6.6 to -0.7)     | -4.1% (-12.8 to 4.5)    |
|                         | Palestine                       |       |        | -31.4% (-56.5 to -6.2)  | -10.4% (-16 to -1.7)   | -10.6% (-18.3 to 1)     |
|                         | Qatar                           |       |        | -7.8% (-11.7 to -3.8)   | -8% (-12.3 to -4.6)    | -8.1% (-16.4 to 1.1)    |
|                         | Saudi Arabia                    |       |        | -1.7% (-6.1 to 3)       | -0.4% (-3.5 to 2.7)    | -0.6% (-7.7 to 7.4)     |
|                         | Sudan                           |       |        | -8.5% (-26.8 to 2.2)    | 0.5% (-3.3 to 3.8)     | 0.6% (-8 to 10.9)       |
|                         | Syrian Arab Republic            |       |        | 131.7% (47.1 to 348)    | 250.6% (93.2 to 517.5) | 244.1% (93.1 to 520.2)  |
|                         | Tunisia                         |       |        | 4.4% (0.3 to 8.6)       | 4.4% (1.8 to 6.9)      | 4.2% (-5.3 to 15.7)     |
|                         | Turkey                          |       |        | 13.5% (10 to 17)        | 12.8% (9.6 to 16)      | 13% (2.2 to 25)         |
|                         | United Arab Emirates            |       |        | -2.2% (-6.4 to 1.9)     | 0% (-2.8 to 2.8)       | -0.1% (-10.1 to 11.3)   |
|                         | Yemen                           |       |        | 164.2% (52.7 to 384.2)  | 56.8% (20.3 to 120.8)  | 54.5% (17.5 to 118.5)   |
| Moderate/<br>Severe TBI | Global                          |       |        | -0.6% (-2.4 to 1.4)     | 0.3% (-0.4 to 1.2)     | 0.1% (-0.7 to 1)        |
|                         | North Africa and<br>Middle East |       |        | 7.2% (4.2 to 12.3)      | 6.2% (4.5 to 8.6)      | 6% (3.8 to 8.8)         |
|                         | Afghanistan                     |       |        | 50.3% (15.3 to 104.3)   | 3.5% (-11 to 19.8)     | 3.8% (-10.4 to 21.5)    |
|                         | Algeria                         |       |        | 0% (-3.5 to 3.6)        | 0.5% (-1.5 to 2.5)     | 0.1% (-4.9 to 5.6)      |
|                         | Bahrain                         |       |        | 0.5% (-4.2 to 5)        | 6.7% (3.8 to 10.1)     | 6.3% (-0.3 to 13.1)     |
|                         | Egypt                           |       |        | 7.1% (2.7 to 11.7)      | 8.2% (5.8 to 10.6)     | 8.1% (2.3 to 14.4)      |
|                         | Iran                            |       |        | -5% (-7 to -3.1)        | -6.1% (-8 to -4.7)     | -6.3% (-8.5 to -4.5)    |
|                         | Iraq                            |       |        | -10.1% (-22.3 to -1.8)  | 0.3% (-2.6 to 2.7)     | 0.2% (-4.5 to 5.3)      |
|                         | Jordan                          |       |        | 1.2% (-2.6 to 5)        | 3.3% (1 to 5.5)        | 3.2% (-2.6 to 10.2)     |
|                         | Kuwait                          |       |        | -7.7% (-11.9 to -3.2)   | -7.3% (-9.7 to -5.1)   | -7.4% (-12.1 to -2.6)   |
|                         | Lebanon                         |       |        | 13.9% (10.4 to 17.2)    | 5.8% (-4.8 to 13.4)    | 5.9% (-6.7 to 16.2)     |
|                         | Libya                           |       |        | 3.6% (-3.5 to 15.9)     | 1.1% (-2.8 to 8.8)     | 1% (-5.3 to 9.5)        |
|                         | Morocco                         |       |        | 2.3% (-1.8 to 6.1)      | 2.2% (-0.1 to 4.6)     | 1.9% (-3.1 to 7.3)      |
|                         | Oman                            |       |        | -6.3% (-11.5 to -1)     | -2.3% (-4.2 to -0.3)   | -2.5% (-6.7 to 2.1)     |
|                         | Palestine                       |       |        | -0.1% (-16.5 to 10.7)   | -1.6% (-10.4 to 7.1)   | -1.5% (-10.8 to 8.8)    |
|                         | Qatar                           |       |        | -8.7% (-12.5 to -5.1)   | -6.4% (-8.6 to -4.3)   | -6.9% (-11.4 to -2.2)   |
|                         | Saudi Arabia                    |       |        | 0.6% (-3.5 to 4.6)      | 2.4% (0.2 to 4.7)      | 2.1% (-1.9 to 6.5)      |
|                         | Sudan                           |       |        | -2.1% (-8.5 to 3.4)     | 1.7% (-0.9 to 3.9)     | 1.3% (-6.5 to 10.3)     |
|                         | Syrian Arab Republic            |       |        | 63.7% (21.7 to 156.8)   | 84.5% (30.2 to 211)    | 80.6% (28.3 to 207.8)   |
|                         | Tunisia                         |       |        | 2.9% (-1.1 to 6.7)      | 3.3% (1.1 to 5.7)      | 3.3% (-2 to 8.5)        |
|                         | Turkey                          |       |        | 15.3% (11.4 to 19.3)    | 13.9% (11.2 to 16.5)   | 13.9% (7.9 to 20.3)     |
|                         | United Arab Emirates            |       |        | -6% (-10.3 to -1.2)     | 0.4% (-2.1 to 2.6)     | 0.2% (-5.2 to 5.8)      |
|                         | Yemen                           |       |        | 29.9% (6.7 to 79.8)     | 10.3% (1.1 to 31.6)    | 9.9% (-0.9 to 30.5)     |
| Spinal injuries¶        | Global                          |       |        | 0.4% (-7.7 to 5.9)      | 8.2% (6.4 to 9.5)      | 6% (3.9 to 7.6)         |
|                         | North Africa and<br>Middle East |       |        | 31.1% (11.7 to 59.7)    | 15.6% (6.5 to 26.5)    | 14.6% (3.4 to 27.3)     |
|                         | Afghanistan                     |       |        | 122.1% (44 to 203.8)    | -6.5% (-24 to 34)      | -7.9% (-25.3 to 34.3)   |
|                         | Algeria                         |       |        | -4.8% (-17.3 to 2.3)    | -1.6% (-6.4 to 2.7)    | -6.3% (-14.7 to 3.9)    |
|                         | Bahrain                         |       |        | 4.5% (0.4 to 8.4)       | 11.1% (7.9 to 14.5)    | 7.6% (-3.4 to 19.4)     |
|                         | Egypt                           |       |        | 16.4% (8.4 to 32.9)     | 15.3% (11.3 to 20.2)   | 11.8% (0.1 to 26.1)     |
|                         | Iran                            |       |        | -6.9% (-12.5 to -2.8)   | -13% (-18.4 to -7.4)   | -17.5% (-22.9 to -11.2) |
|                         | Iraq                            |       |        | -53.4% (-68.7 to -25.1) | 3.8% (1 to 6.2)        | 1.5% (-4.2 to 6.7)      |
|                         | Jordan                          |       |        | 3.5% (-0.1 to 6.8)      | 9.4% (5.4 to 16.2)     | 6.6% (-6 to 21.8)       |
|                         | Kuwait                          |       |        | -4.3% (-8 to -0.6)      | -7.9% (-14 to -2.8)    | -10.5% (-18.9 to -0.3)  |
|                         | Lebanon                         |       |        | 16.8% (13.3 to 21)      | -18.4% (-24.4 to 0)    | -21.9% (-27.8 to -3.8)  |

**Table S33** Temporal changes in the age-standardised rate of DALYs, mortality, incidence, prevalence, and YLDs of neurological conditions in North Africa and Middle East and the world from 2010 to 2019

| Condition                           | Location                     | DALYs | Deaths | Incidence                | Prevalence               | YLDs                     |
|-------------------------------------|------------------------------|-------|--------|--------------------------|--------------------------|--------------------------|
|                                     | Libya                        |       |        | 112.3% (25.1 to 336.9)   | 55.2% (17.7 to 109.8)    | 69.4% (23.3 to 130.9)    |
|                                     | Morocco                      |       |        | 2.4% (-1.2 to 6)         | 2.3% (-1.2 to 5.1)       | -2.2% (-11.4 to 7.5)     |
|                                     | Oman                         |       |        | -6.4% (-12 to -1.8)      | 5.8% (3.5 to 8.4)        | 2.3% (-7.8 to 12.7)      |
|                                     | Palestine                    |       |        | -55.8% (-76.6 to -18)    | -16.6% (-19.3 to -9.8)   | -19.6% (-23 to -12.1)    |
|                                     | Qatar                        |       |        | -6.6% (-10 to -3.1)      | -3.3% (-6.5 to 0.4)      | -5% (-13.9 to 4.3)       |
|                                     | Saudi Arabia                 |       |        | 0.6% (-2.9 to 4.2)       | 3.6% (1 to 6.3)          | -2.3% (-9.6 to 6.2)      |
|                                     | Sudan                        |       |        | -5% (-25.9 to 7.3)       | 4.5% (-2.2 to 10.4)      | 0.3% (-8 to 10.7)        |
|                                     | Syrian Arab Republic         |       |        | 549.6% (125.3 to 1643.3) | 639.7% (205.3 to 1335)   | 771.2% (260.8 to 1616.4) |
|                                     | Tunisia                      |       |        | 7.1% (3.2 to 11.4)       | 7.6% (4.8 to 10.9)       | 4% (-6.3 to 15.6)        |
|                                     | Turkey                       |       |        | 14.5% (11.1 to 18)       | 9.7% (5 to 13.5)         | 5.9% (-4.3 to 16.8)      |
|                                     | United Arab Emirates         |       |        | -1.8% (-6.3 to 2.4)      | 3% (0.5 to 5.5)          | 0.2% (-9.9 to 12.7)      |
|                                     | Yemen                        |       |        | 381.1% (105.4 to 818.9)  | 98.2% (26.9 to 205.4)    | 112.8% (32.8 to 224.8)   |
| Spinal cord lesion at neck level    | Global                       |       |        | 0.4% (-9 to 6.9)         | 8.6% (6.1 to 10.2)       | 7.1% (4.2 to 9.2)        |
|                                     | North Africa and Middle East |       |        | 44.5% (16.5 to 76.3)     | 20.3% (7.4 to 33.4)      | 18.5% (5.2 to 32.2)      |
|                                     | Afghanistan                  |       |        | 136.8% (53.6 to 220.7)   | -7% (-24.5 to 39)        | -8.1% (-25.9 to 38.8)    |
|                                     | Algeria                      |       |        | -11.3% (-30.6 to -0.3)   | -4.2% (-9.4 to 1.7)      | -6.5% (-16.8 to 7.3)     |
|                                     | Bahrain                      |       |        | 3.9% (-1.2 to 8.5)       | 10.8% (6.7 to 15.3)      | 9.2% (-4.6 to 25.8)      |
|                                     | Egypt                        |       |        | 23.4% (9.7 to 56.4)      | 18.4% (12.3 to 28)       | 16.2% (-0.8 to 36.2)     |
|                                     | Iran                         |       |        | -9.2% (-18.3 to -3.6)    | -16.4% (-22.2 to -8.7)   | -18.4% (-24.4 to -10.4)  |
|                                     | Iraq                         |       |        | -63.6% (-73.9 to -36.7)  | 3.8% (0.7 to 6.5)        | 1.9% (-4 to 8)           |
|                                     | Jordan                       |       |        | 3.3% (-0.8 to 7.2)       | 12.9% (5.8 to 25.5)      | 11.4% (-5.8 to 34.3)     |
|                                     | Kuwait                       |       |        | -5% (-9.2 to -1)         | -11.8% (-18.3 to -5)     | -12.5% (-21.2 to -0.2)   |
|                                     | Lebanon                      |       |        | 18.1% (13.5 to 24.8)     | -22.5% (-26.6 to -7.3)   | -23.8% (-28.9 to -6.4)   |
|                                     | Libya                        |       |        | 209.4% (46.6 to 649.7)   | 86.8% (29.8 to 147.3)    | 89.6% (31.1 to 153.8)    |
|                                     | Morocco                      |       |        | 2.1% (-2.6 to 6.2)       | 1% (-4.9 to 5.6)         | -1.3% (-13.4 to 13)      |
|                                     | Oman                         |       |        | -6.6% (-13.4 to -1)      | 7.2% (3.8 to 10.8)       | 5.3% (-7.6 to 20.1)      |
|                                     | Palestine                    |       |        | -69.7% (-83.6 to -34.1)  | -18.2% (-20.4 to -13.7)  | -20.3% (-23.7 to -13.5)  |
|                                     | Qatar                        |       |        | -6.9% (-10.7 to -3.2)    | -3.1% (-7.3 to 1.6)      | -4.3% (-15.6 to 8.1)     |
|                                     | Saudi Arabia                 |       |        | 1% (-2.9 to 4.8)         | 5.3% (1.3 to 9.2)        | 2.1% (-7.8 to 13.9)      |
|                                     | Sudan                        |       |        | -15% (-43.7 to 4.8)      | 1.2% (-5.7 to 9.3)       | -1% (-10.6 to 13.2)      |
|                                     | Syrian Arab Republic         |       |        | 1009.2% (207.2 to 3164)  | 992.5% (372.5 to 1958.7) | 994.3% (375.3 to 2011.5) |
|                                     | Tunisia                      |       |        | 8% (3.2 to 14.3)         | 8.9% (4.9 to 13.8)       | 6.8% (-6.9 to 23.2)      |
|                                     | Turkey                       |       |        | 15.1% (11 to 19.2)       | 10.5% (5.1 to 14.8)      | 8.3% (-4.6 to 22.8)      |
|                                     | United Arab Emirates         |       |        | -2.7% (-8.1 to 2.2)      | 2.1% (-1.3 to 5.7)       | 0.5% (-12.7 to 18)       |
|                                     | Yemen                        |       |        | 611.8% (183.7 to 1146.1) | 164.2% (52.5 to 288.9)   | 162% (50.4 to 287.2)     |
| Spinal cord lesion below neck level | Global                       |       |        | 0.4% (-11.7 to 7.7)      | 7.7% (6.4 to 8.9)        | 3.6% (1.9 to 5.2)        |
|                                     | North Africa and Middle East |       |        | 5.9% (2.9 to 8.7)        | 4.8% (1 to 7.4)          | -2.6% (-7.5 to 2)        |
|                                     | Afghanistan                  |       |        | -3.5% (-18.5 to 8.7)     | 1.1% (-4.9 to 6.5)       | -3.6% (-17 to 13.3)      |
|                                     | Algeria                      |       |        | 3.9% (0 to 7.6)          | 2.3% (-2 to 6.5)         | -5.6% (-17.6 to 8.2)     |
|                                     | Bahrain                      |       |        | 5.2% (0.6 to 9.2)        | 11.3% (7.7 to 14.8)      | 3.9% (-9.8 to 20.4)      |
|                                     | Egypt                        |       |        | 8.1% (4.1 to 12.2)       | 12.2% (8.6 to 16.5)      | 4% (-10.3 to 20.4)       |
|                                     | Iran                         |       |        | -4.1% (-9.9 to 0.4)      | -7.1% (-12.7 to -2.9)    | -14.3% (-19.7 to -8.7)   |
|                                     | Iraq                         |       |        | 1.9% (-0.8 to 4.9)       | 3.7% (1.1 to 6.7)        | -4.8% (-15.3 to 8.9)     |
|                                     | Jordan                       |       |        | 3.7% (-0.2 to 7.3)       | 5.8% (2.6 to 9.4)        | -3.1% (-16.7 to 11.6)    |
|                                     | Kuwait                       |       |        | -3.5% (-7.4 to 0.5)      | -1.3% (-4.7 to 2.2)      | -3.1% (-14 to 10.2)      |
|                                     | Lebanon                      |       |        | 15.3% (11.9 to 18.5)     | 15.8% (12.2 to 19.5)     | 12.6% (-1.5 to 29.1)     |

**Table S33** Temporal changes in the age-standardised rate of DALYs, mortality, incidence, prevalence, and YLDs of neurological conditions in North Africa and Middle East and the world from 2010 to 2019

| Condition | Location             | DALYs | Deaths | Incidence             | Prevalence           | YLDs                  |
|-----------|----------------------|-------|--------|-----------------------|----------------------|-----------------------|
|           | Libya                |       |        | -0.8% (-3.9 to 2.5)   | 3.9% (-1 to 11.5)    | 5.2% (-8.1 to 19.8)   |
|           | Morocco              |       |        | 2.8% (-1.4 to 7.1)    | 3.6% (0.4 to 6.7)    | -4% (-15.8 to 10.1)   |
|           | Oman                 |       |        | -6.1% (-13.5 to -0.5) | 4.4% (1.4 to 7.5)    | -3.9% (-15.7 to 9.3)  |
|           | Palestine            |       |        | 18.4% (14.3 to 24.6)  | 4.5% (-6 to 12.7)    | -3.2% (-17.7 to 14.2) |
|           | Qatar                |       |        | -6.2% (-9.8 to -2.6)  | -3.5% (-7.9 to 1.1)  | -6.6% (-18.2 to 5.7)  |
|           | Saudi Arabia         |       |        | 0.2% (-3.4 to 3.9)    | 1.9% (-1.7 to 5.8)   | -10.3% (-19.7 to 0)   |
|           | Sudan                |       |        | 9.2% (4.3 to 14.8)    | 10.1% (6.1 to 14.5)  | 3.7% (-6.4 to 15.2)   |
|           | Syrian Arab Republic |       |        | 27.6% (14.3 to 55.9)  | 15.4% (10.2 to 22.3) | 11.2% (-4.9 to 29.7)  |
|           | Tunisia              |       |        | 6% (2 to 9.6)         | 6.2% (2.7 to 9.8)    | -1.7% (-13.9 to 12.2) |
|           | Turkey               |       |        | 13.8% (9.1 to 18.1)   | 8.8% (2.4 to 14.3)   | 0.1% (-11.7 to 14.6)  |
|           | United Arab Emirates |       |        | -0.8% (-5.6 to 3.8)   | 4% (0.6 to 7.5)      | -0.3% (-13.8 to 15.3) |
|           | Yemen                |       |        | -1.8% (-6.1 to 2.1)   | 0% (-3.8 to 3.1)     | -3.1% (-17.3 to 11.6) |

The presented data represent the mean percentage changes in age-standardized rates for each measure, along with their corresponding 95% uncertainty intervals enclosed in parentheses. Data are rounded to one decimal place. DALYs, Disability-Adjusted Life Years; TBI, traumatic brain injury; UI, uncertainty interval; YLDs, Years Lived with Disability. \*Stroke include ischaemic stroke, intracerebral haemorrhage, and subarachnoid haemorrhage; †Neurological disorders include Alzheimer's disease and other dementias, Parkinson's disease, idiopathic epilepsy, multiple sclerosis, headache disorders (including migraine and tension-type headache), motor neuron disease, and other neurological disorders; ‡Headache disorders include migraine and tension-type headache. §Head injuries include minor TBI and moderate or severe TBI. ¶Spinal injuries include spinal cord lesion at neck level and below neck level.

***Table S34 Systematic literature search for the epidemiological measures of neurological conditions in North Africa and Middle East countries***  
(NEXT PAGE)

**Table S32** Systematic literature search for epidemiological measures of neurological conditions\* in North Africa and Middle East countries

| Disease               | Measure(s)             | Countries                    | Reference                  | PubMed link                                                                                       |
|-----------------------|------------------------|------------------------------|----------------------------|---------------------------------------------------------------------------------------------------|
| Alzheimer's disease   | Prevalence             | Egypt                        | Farrag et al. 1998         | <a href="https://pubmed.ncbi.nlm.nih.gov/9769445/">https://pubmed.ncbi.nlm.nih.gov/9769445/</a>   |
| Epilepsy              | Prevalence             | Morocco                      | Souirti et al. 2023        | <a href="https://pubmed.ncbi.nlm.nih.gov/37805672/">https://pubmed.ncbi.nlm.nih.gov/37805672/</a> |
|                       | Incidence              | Sudan                        | Jada et al. 2023           | <a href="https://pubmed.ncbi.nlm.nih.gov/37474232/">https://pubmed.ncbi.nlm.nih.gov/37474232/</a> |
|                       | Prevalence             | Iran                         | Pakdaman et al. 2021       | <a href="https://pubmed.ncbi.nlm.nih.gov/33941831/">https://pubmed.ncbi.nlm.nih.gov/33941831/</a> |
|                       | Death                  | Türkiye                      | Yucel et al. 2021          | <a href="https://pubmed.ncbi.nlm.nih.gov/33401066/">https://pubmed.ncbi.nlm.nih.gov/33401066/</a> |
|                       | Prevalence             | Iran                         | Asadi-Pooya et al. 2021    | <a href="https://pubmed.ncbi.nlm.nih.gov/33222160/">https://pubmed.ncbi.nlm.nih.gov/33222160/</a> |
|                       | Burden                 | Sudan                        | Jada et al. 2020           | <a href="https://pubmed.ncbi.nlm.nih.gov/32810838/">https://pubmed.ncbi.nlm.nih.gov/32810838/</a> |
|                       | Incidence              | Oman                         | Al-Asmi et al. 2020        | <a href="https://pubmed.ncbi.nlm.nih.gov/32590287/">https://pubmed.ncbi.nlm.nih.gov/32590287/</a> |
|                       | Prevalence, incidence  | Sudan                        | Colebunders et al. 2019    | <a href="https://pubmed.ncbi.nlm.nih.gov/30468964/">https://pubmed.ncbi.nlm.nih.gov/30468964/</a> |
|                       | Incidence              | Sudan                        | Abd-Elfarag et al. 2019    | <a href="https://pubmed.ncbi.nlm.nih.gov/30424817/">https://pubmed.ncbi.nlm.nih.gov/30424817/</a> |
|                       | Prevalence             | Saudi Arabia                 | Alsharif et al. 2017       | <a href="https://pubmed.ncbi.nlm.nih.gov/28979739/">https://pubmed.ncbi.nlm.nih.gov/28979739/</a> |
|                       | Prevalence             | Sudan                        | Mohamed et al. 2017        | <a href="https://pubmed.ncbi.nlm.nih.gov/28162058/">https://pubmed.ncbi.nlm.nih.gov/28162058/</a> |
|                       | Prevalence             | Egypt                        | Hashem et al. 2015         | <a href="https://pubmed.ncbi.nlm.nih.gov/26454046/">https://pubmed.ncbi.nlm.nih.gov/26454046/</a> |
|                       | Prevalence, incidence  | Egypt                        | Fawi et al. 2015           | <a href="https://pubmed.ncbi.nlm.nih.gov/25986192/">https://pubmed.ncbi.nlm.nih.gov/25986192/</a> |
|                       | Prevalence, incidence  | Egypt                        | Khedr et al. 2013          | <a href="https://pubmed.ncbi.nlm.nih.gov/22948127/">https://pubmed.ncbi.nlm.nih.gov/22948127/</a> |
|                       | Prevalence             | Türkiye and Pakistan         | Aziz et al. 1997           | <a href="https://pubmed.ncbi.nlm.nih.gov/9186255/">https://pubmed.ncbi.nlm.nih.gov/9186255/</a>   |
|                       | Headache               | Prevalence                   | Egypt                      | Elsary et al. 2023                                                                                |
| Prevalence            |                        | Türkiye                      | Erdoğan et al. 2021        | <a href="https://pubmed.ncbi.nlm.nih.gov/34152113/">https://pubmed.ncbi.nlm.nih.gov/34152113/</a> |
| Prevalence            |                        | Saudi Arabia                 | Almalki et al. 2021        | <a href="https://pubmed.ncbi.nlm.nih.gov/33747320/">https://pubmed.ncbi.nlm.nih.gov/33747320/</a> |
| Prevalence            |                        | Saudi Arabia                 | Jumah et al. 2020          | <a href="https://pubmed.ncbi.nlm.nih.gov/32033539/">https://pubmed.ncbi.nlm.nih.gov/32033539/</a> |
| Prevalence            |                        | Türkiye                      | Wöber et al. 2018          | <a href="https://pubmed.ncbi.nlm.nih.gov/29484508/">https://pubmed.ncbi.nlm.nih.gov/29484508/</a> |
| Prevalence            |                        | Kuwait                       | Al-Hashel et al. 2017      | <a href="https://pubmed.ncbi.nlm.nih.gov/28728154/">https://pubmed.ncbi.nlm.nih.gov/28728154/</a> |
| Prevalence            |                        | Oman                         | Deleu et al. 2002          | <a href="https://pubmed.ncbi.nlm.nih.gov/12453027/">https://pubmed.ncbi.nlm.nih.gov/12453027/</a> |
| Headache and migraine | Prevalence             | Qatar                        | Bener. 2006                | <a href="https://pubmed.ncbi.nlm.nih.gov/16847389/">https://pubmed.ncbi.nlm.nih.gov/16847389/</a> |
| Meningitis            | Incidence              | Tunisia                      | Soltani et al. 2005        | <a href="https://pubmed.ncbi.nlm.nih.gov/16532667/">https://pubmed.ncbi.nlm.nih.gov/16532667/</a> |
|                       | Burden                 | Saudi Arabia                 | Al-Mazroui et al. 2003     | <a href="https://pubmed.ncbi.nlm.nih.gov/14710273/">https://pubmed.ncbi.nlm.nih.gov/14710273/</a> |
| Migraine              | Prevalence             | Iran                         | Mohammadi et al. 2023      | <a href="https://pubmed.ncbi.nlm.nih.gov/37106419/">https://pubmed.ncbi.nlm.nih.gov/37106419/</a> |
|                       | Prevalence             | Türkiye                      | Akarsu et al. 2019         | <a href="https://pubmed.ncbi.nlm.nih.gov/32550778/">https://pubmed.ncbi.nlm.nih.gov/32550778/</a> |
|                       | Prevalence             | Egypt                        | Kandil et al. 2016         | <a href="https://pubmed.ncbi.nlm.nih.gov/27078706/">https://pubmed.ncbi.nlm.nih.gov/27078706/</a> |
|                       | Incidence              | Türkiye                      | Baykan et al. 2015         | <a href="https://pubmed.ncbi.nlm.nih.gov/26634568/">https://pubmed.ncbi.nlm.nih.gov/26634568/</a> |
|                       | Prevalence, disability | Türkiye                      | Ozdemir et al. 2014        | <a href="https://pubmed.ncbi.nlm.nih.gov/25551933/">https://pubmed.ncbi.nlm.nih.gov/25551933/</a> |
|                       | Prevalence             | Türkiye                      | Börü et al. 2005           | <a href="https://pubmed.ncbi.nlm.nih.gov/15802875/">https://pubmed.ncbi.nlm.nih.gov/15802875/</a> |
| Multiple sclerosis    | Prevalence             | Iran                         | Nasiri et al. 2023         | <a href="https://pubmed.ncbi.nlm.nih.gov/37637785/">https://pubmed.ncbi.nlm.nih.gov/37637785/</a> |
|                       | Prevalence             | Iran                         | Nasiri et al. 2023         | <a href="https://pubmed.ncbi.nlm.nih.gov/37543896/">https://pubmed.ncbi.nlm.nih.gov/37543896/</a> |
|                       | Incidence              | Iran                         | Kamali et al. 2022         | <a href="https://pubmed.ncbi.nlm.nih.gov/36407743/">https://pubmed.ncbi.nlm.nih.gov/36407743/</a> |
|                       | Prevalence             | Saudi Arabia                 | Bahathig et al. 2021       | <a href="https://pubmed.ncbi.nlm.nih.gov/33532152/">https://pubmed.ncbi.nlm.nih.gov/33532152/</a> |
|                       | Prevalence, incidence  | Iran                         | Molazadeh et al. 2021      | <a href="https://pubmed.ncbi.nlm.nih.gov/33217696/">https://pubmed.ncbi.nlm.nih.gov/33217696/</a> |
|                       | Prevalence             | Jordan                       | Kofahi et al. 2020         | <a href="https://pubmed.ncbi.nlm.nih.gov/33121451/">https://pubmed.ncbi.nlm.nih.gov/33121451/</a> |
|                       | Incidence              | Iran                         | Hosseinzadeh et al. 2019   | <a href="https://pubmed.ncbi.nlm.nih.gov/31476710/">https://pubmed.ncbi.nlm.nih.gov/31476710/</a> |
|                       | Incidence              | Iran                         | Hosseinzadeh et al. 2019   | <a href="https://pubmed.ncbi.nlm.nih.gov/30634104/">https://pubmed.ncbi.nlm.nih.gov/30634104/</a> |
|                       | Prevalence             | Iran                         | Eskandarieh et al. 2018    | <a href="https://pubmed.ncbi.nlm.nih.gov/29415659/">https://pubmed.ncbi.nlm.nih.gov/29415659/</a> |
|                       | Incidence              | Iran                         | Abdollahpour et al. 2018   | <a href="https://pubmed.ncbi.nlm.nih.gov/29353734/">https://pubmed.ncbi.nlm.nih.gov/29353734/</a> |
|                       | Prevalence             | Iran                         | Eskandarieh et al. 2017    | <a href="https://pubmed.ncbi.nlm.nih.gov/28560202/">https://pubmed.ncbi.nlm.nih.gov/28560202/</a> |
|                       | Prevalence             | North Africa and Middle East | Heydarpour et al. 2015     | <a href="https://pubmed.ncbi.nlm.nih.gov/26088327/">https://pubmed.ncbi.nlm.nih.gov/26088327/</a> |
|                       | Prevalence, incidence  | Iran                         | Etemadifar et al. 2013     | <a href="https://pubmed.ncbi.nlm.nih.gov/24192707/">https://pubmed.ncbi.nlm.nih.gov/24192707/</a> |
|                       | Prevalence, incidence  | Iran                         | Elhami et al. 2011         | <a href="https://pubmed.ncbi.nlm.nih.gov/21508646/">https://pubmed.ncbi.nlm.nih.gov/21508646/</a> |
|                       | Prevalence, incidence  | Iran                         | Maghzi et al. 2010         | <a href="https://pubmed.ncbi.nlm.nih.gov/20086021/">https://pubmed.ncbi.nlm.nih.gov/20086021/</a> |
|                       | Incidence              | Iran                         | Maghzi et al. 2007         | <a href="https://pubmed.ncbi.nlm.nih.gov/17548450/">https://pubmed.ncbi.nlm.nih.gov/17548450/</a> |
| Parkinson's disease   | Prevalence             | Egypt                        | Khedr et al. 2015          | <a href="https://pubmed.ncbi.nlm.nih.gov/25796953/">https://pubmed.ncbi.nlm.nih.gov/25796953/</a> |
|                       | Prevalence             | Iran                         | Fereshtehnejad et al. 2015 | <a href="https://pubmed.ncbi.nlm.nih.gov/25709455/">https://pubmed.ncbi.nlm.nih.gov/25709455/</a> |
|                       | Prevalence             | Türkiye                      | Durmus et al. 2014         | <a href="https://pubmed.ncbi.nlm.nih.gov/25351343/">https://pubmed.ncbi.nlm.nih.gov/25351343/</a> |
|                       | Prevalence             | Egypt                        | Khedr et al. 2012          | <a href="https://pubmed.ncbi.nlm.nih.gov/22473384/">https://pubmed.ncbi.nlm.nih.gov/22473384/</a> |
| Stroke                | Incidence              | Iran                         | Aghaali et al. 2022        | <a href="https://pubmed.ncbi.nlm.nih.gov/34292120/">https://pubmed.ncbi.nlm.nih.gov/34292120/</a> |
|                       | Prevalence, burden     | Iran                         | Movahed et al. 2021        | <a href="https://pubmed.ncbi.nlm.nih.gov/33517227/">https://pubmed.ncbi.nlm.nih.gov/33517227/</a> |

**Table S32** Systematic literature search for epidemiological measures of neurological conditions\* in North Africa and Middle East countries

| Disease                | Measure(s)               | Countries | Reference                   | PubMed link                                                                                       |
|------------------------|--------------------------|-----------|-----------------------------|---------------------------------------------------------------------------------------------------|
|                        | Incidence, mortality     | Algeria   | Bezzaoucha et al. 2020      | <a href="https://pubmed.ncbi.nlm.nih.gov/32395772/">https://pubmed.ncbi.nlm.nih.gov/32395772/</a> |
|                        | Prevalence               | Egypt     | Shaken et al. 2019          | <a href="https://pubmed.ncbi.nlm.nih.gov/31301986/">https://pubmed.ncbi.nlm.nih.gov/31301986/</a> |
|                        | Incidence                | Iran      | Morovatdar et al. 2019      | <a href="https://pubmed.ncbi.nlm.nih.gov/30991387/">https://pubmed.ncbi.nlm.nih.gov/30991387/</a> |
|                        | Disability               | Iran      | Farzadfard et al. 2019      | <a href="https://pubmed.ncbi.nlm.nih.gov/30117788/">https://pubmed.ncbi.nlm.nih.gov/30117788/</a> |
|                        | Prevalence               | Türkiye   | Köseoğlu Toksoy et al. 2018 | <a href="https://pubmed.ncbi.nlm.nih.gov/30057814/">https://pubmed.ncbi.nlm.nih.gov/30057814/</a> |
|                        | Prevalence               | Türkiye   | Padir Şensöz et al. 2017    | <a href="https://pubmed.ncbi.nlm.nih.gov/29736423/">https://pubmed.ncbi.nlm.nih.gov/29736423/</a> |
|                        | Mortality                | Iran      | Farzadfard et al. 2018      | <a href="https://pubmed.ncbi.nlm.nih.gov/29433933/">https://pubmed.ncbi.nlm.nih.gov/29433933/</a> |
|                        | Incidence, mortality     | Iran      | Salehi et al. 2018          | <a href="https://pubmed.ncbi.nlm.nih.gov/29320778/">https://pubmed.ncbi.nlm.nih.gov/29320778/</a> |
|                        | Prevalence, incidence    | Egypt     | Abd-Allah et al. 2018       | <a href="https://pubmed.ncbi.nlm.nih.gov/29258372/">https://pubmed.ncbi.nlm.nih.gov/29258372/</a> |
|                        | Incidence                | Iran      | Saber et al. 2017           | <a href="https://pubmed.ncbi.nlm.nih.gov/28796991/">https://pubmed.ncbi.nlm.nih.gov/28796991/</a> |
|                        | Incidence                | Iran      | Saber et al. 2017           | <a href="https://pubmed.ncbi.nlm.nih.gov/28043215/">https://pubmed.ncbi.nlm.nih.gov/28043215/</a> |
|                        | Burden                   | Qatar     | Ibrahim et al. 2015         | <a href="https://pubmed.ncbi.nlm.nih.gov/26604108/">https://pubmed.ncbi.nlm.nih.gov/26604108/</a> |
|                        | Mortality                | Iran      | Shoeibi et al. 2015         | <a href="https://pubmed.ncbi.nlm.nih.gov/26502970/">https://pubmed.ncbi.nlm.nih.gov/26502970/</a> |
|                        | Prevalence               | Lebanon   | Farah et al. 2015           | <a href="https://pubmed.ncbi.nlm.nih.gov/26178607/">https://pubmed.ncbi.nlm.nih.gov/26178607/</a> |
|                        | Prevalence               | Morocco   | Engels et al. 2014          | <a href="https://pubmed.ncbi.nlm.nih.gov/24586649/">https://pubmed.ncbi.nlm.nih.gov/24586649/</a> |
|                        | Prevalence               | Egypt     | Khedr et al. 2013           | <a href="https://pubmed.ncbi.nlm.nih.gov/23486276/">https://pubmed.ncbi.nlm.nih.gov/23486276/</a> |
|                        | Incidence                | Iran      | Azarpazhooh et al. 2010     | <a href="https://pubmed.ncbi.nlm.nih.gov/19926844/">https://pubmed.ncbi.nlm.nih.gov/19926844/</a> |
|                        | Incidence, mortality     | Iran      | Oveisgharan et al. 2007     | <a href="https://pubmed.ncbi.nlm.nih.gov/17971627/">https://pubmed.ncbi.nlm.nih.gov/17971627/</a> |
|                        | Incidence                | Qatar     | Hamad et al. 2001           | <a href="https://pubmed.ncbi.nlm.nih.gov/17903831/">https://pubmed.ncbi.nlm.nih.gov/17903831/</a> |
| Neurological disorders | Incidence and prevalence | UAE       | Benamer and Loney. 2023     | <a href="https://pubmed.ncbi.nlm.nih.gov/37923997/">https://pubmed.ncbi.nlm.nih.gov/37923997/</a> |

PubMed search date: January 1, 2024. \*Neurological conditions included stroke, encephalitis, meningitis, tetanus, brain and central nervous system cancer, Alzheimer's disease and other dementias, Parkinson's disease, idiopathic epilepsy, multiple sclerosis, headache disorders (including migraine and tension-type headache), motor neuron disease, and other neurological disorders.

## References

- 1 GBD 2019 Diseases and Injuries Collaborators. Global burden of 369 diseases and injuries in 204 countries and territories, 1990-2019: a systematic analysis for the Global Burden of Disease Study 2019. *Lancet* 2020; **396**: 1204–22.
- 2 GBD 2019 Risk Factors Collaborators. Global burden of 87 risk factors in 204 countries and territories, 1990-2019: a systematic analysis for the Global Burden of Disease Study 2019. *Lancet* 2020; **396**: 1223–49.
- 3 GBD 2019 Stroke Collaborators. Global, regional, and national burden of stroke and its risk factors, 1990-2019: a systematic analysis for the Global Burden of Disease Study 2019. *Lancet Neurol* 2021; **20**: 795–820.
- 4 Burkart KG, Brauer M, Aravkin AY, *et al*. Estimating the cause-specific relative risks of non-optimal temperature on daily mortality: a two-part modelling approach applied to the Global Burden of Disease Study. *Lancet* 2021; **398**: 685–97.
- 5 GBD 2016 Neurology Collaborators. Global, regional, and national burden of neurological disorders, 1990-2016: a systematic analysis for the Global Burden of Disease Study 2016. *Lancet Neurol* 2019; **18**: 459–80.
- 6 Zheng P, Barber R, Sorensen RJD, Murray CJL, Aravkin AY. Trimmed constrained mixed effects models: formulations and algorithms. *Journal of Computational and Graphical Statistics* 2021; : 1–13.
- 7 Salomon JA, Haagsma JA, Davis A, *et al*. Disability weights for the Global Burden of Disease 2013 study. *Lancet Glob Health* 2015; **3**: e712-23.
- 8 GBD 2019 Collaborators. Global mortality from dementia: Application of a new method and results from the Global Burden of Disease Study 2019. *Alzheimers Dement (N Y)* 2021; **7**: e12200.
- 9 Foreman KJ, Lozano R, Lopez AD, Murray CJ. Modeling causes of death: an integrated approach using CODEm. *Popul Health Metr* 2012; **10**: 1.
- 10 Murray CJL. The Global Burden of Disease Study at 30 years. *Nat Med* 2022; **28**: 2019–26.
- 11 Zheng P, Afshin A, Biryukov S, *et al*. The Burden of Proof studies: assessing the evidence of risk. *Nat Med* 2022; **28**: 2038–44.
- 12 Feigin VL, Owolabi MO, World Stroke Organization–Lancet Neurology Commission Stroke Collaboration Group. Pragmatic solutions to reduce the global burden of stroke: a World Stroke Organization-Lancet Neurology Commission. *Lancet Neurol* 2023; **22**: 1160–206.
- 13 GBD 2019 Demographics Collaborators. Global age-sex-specific fertility, mortality, healthy life expectancy (HALE), and population estimates in 204 countries and territories, 1950-2019: a comprehensive demographic analysis for the Global Burden of Disease Study 2019. *Lancet* 2020; **396**: 1160–203.
- 14 GBD 2017 Causes of Death Collaborators. Global, regional, and national age-sex-specific mortality for 282 causes of death in 195 countries and territories, 1980-2017: a systematic analysis for the Global Burden of Disease Study 2017. *Lancet* 2018; **392**: 1736–88.
- 15 Mukadam N, Sommerlad A, Huntley J, Livingston G. Population attributable fractions for risk factors for dementia in low-income and middle-income countries: an analysis using cross-sectional survey data. *Lancet Glob Health* 2019; **7**: e596–603.
- 16 Harris PA, Taylor R, Thielke R, Payne J, Gonzalez N, Conde JG. Research electronic data capture (REDCap): A metadata-driven methodology and workflow process for providing translational research informatics support. *J Biomed Inform* 2009; **42**: 377–81.
- 17 GBD 2017 Risk Factor Collaborators. Global, regional, and national comparative risk assessment of 84 behavioural, environmental and occupational, and metabolic risks or clusters of risks for 195 countries and



- territories, 1990-2017: a systematic analysis for the Global Burden of Disease Study 2017. *Lancet* 2018; **392**: 1923–94.
- 18 Lim SS, Carnahan E, Nelson EC, *et al.* Validation of a new predictive risk model: measuring the impact of the major modifiable risks of death for patients and populations. *Popul Health Metr* 2015; **13**: 27.
  - 19 Danaei G, Finucane MM, Lin JK, *et al.* National, regional, and global trends in systolic blood pressure since 1980: systematic analysis of health examination surveys and epidemiological studies with 786 country-years and 5·4 million participants. *Lancet* 2011; **377**: 568–77.
  - 20 Das Gupta P. Standardization and Decomposition of Rates: A User's Manual. Washington, DC: U.S. Government Printing Office, 1993.
  - 21 Akushevich I, Kravchenko J, Ukraintseva S, Arbeev K, Yashin AI. Time trends of incidence of age-associated diseases in the US elderly population: Medicare-based analysis. *Age Ageing* 2013; **42**: 494–500.
  - 22 Matthews FE, Arthur A, Barnes LE, *et al.* A two-decade comparison of prevalence of dementia in individuals aged 65 years and older from three geographical areas of England: results of the Cognitive Function and Ageing Study I and II. *Lancet* 2013; **382**: 1405–12.
  - 23 Kim B-K, Chung YK, Kim J-M, Lee K-S, Chu MK. Prevalence, clinical characteristics and disability of migraine and probable migraine: a nationwide population-based survey in Korea. *Cephalalgia* 2013; **33**: 1106–16.
  - 24 Lantéri-Minet M, Valade D, Géraud G, Chautard MH, Lucas C. Migraine and probable migraine--results of FRAMIG 3, a French nationwide survey carried out according to the 2004 IHS classification. *Cephalalgia* 2005; **25**: 1146–58.
  - 25 Pfaffenrath V, Fendrich K, Vennemann M, *et al.* Regional variations in the prevalence of migraine and tension-type headache applying the new IHS criteria: the German DMKG Headache Study. *Cephalalgia* 2009; **29**: 48–57.
  - 26 Rasmussen BK, Jensen R, Olesen J. A population-based analysis of the diagnostic criteria of the International Headache Society. *Cephalalgia* 1991; **11**: 129–34.
  - 27 Fendrich K, Vennemann M, Pfaffenrath V, *et al.* Headache prevalence among adolescents--the German DMKG headache study. *Cephalalgia* 2007; **27**: 347–54.
  - 28 Steiner TJ, Stovner LJ, Al Jumah M, *et al.* Improving quality in population surveys of headache prevalence, burden and cost: key methodological considerations. *J Headache Pain* 2013; **14**: 87.
